# Supplementary material for: Cooperative participation of epigenomic and genomic alterations in the clinicopathological diversity of gastric adenocarcinomas: significance of cell adhesion and epithelial–mesenchymal transition-related signaling pathways
Source: PubMed Central journal article supplement — Carcinogenesis. 2020 Jul 25;41(11):1473–84. doi: 10.1093/carcin/bgaa079 (PMC7665242; doi:10.1093/carcin/bgaa079), 2020-07-25
Supplement: bgaa079_suppl_supplementary-materials.pdf [file bgaa079_suppl_supplementary-materials.pdf]

**Supplementary Table 1.** Clinicopathological parameters of patients with gastric adenocarcinoma included in this study

| Patient ID | Clinicopathological parameter |        |                               |                             |                              |                         |                                 | Epigenomic clustering <sup>4</sup> | Whole-exome analysis |
|------------|-------------------------------|--------|-------------------------------|-----------------------------|------------------------------|-------------------------|---------------------------------|------------------------------------|----------------------|
|            | Age group (years)             | Gender | Helicobacter pylori infection | Histological classification |                              | T category <sup>3</sup> | Pathological stage <sup>3</sup> |                                    |                      |
|            |                               |        |                               | Predominant <sup>1</sup>    | Most aggressive <sup>2</sup> |                         |                                 |                                    |                      |
| Case 1     | 60 to under 70                | M      | -                             | pap                         | tub1                         | 2                       | I B                             | A                                  | Y                    |
| Case 2     | 60 to under 70                | M      | +                             | tub1                        | por2                         | 2                       | I B                             | B2                                 | Y                    |
| Case 3     | 70 to under 80                | M      | +                             | por1                        | por1                         | 3                       | II B                            | A                                  | ND                   |
| Case 4     | 70 to under 80                | M      | +                             | por1                        | sig                          | 2                       | II A                            | B2                                 | Y                    |
| Case 5     | 40 to under 50                | F      | +                             | por1                        | por1                         | 1                       | I A                             | B2                                 | ND                   |
| Case 6     | 50 to under 60                | M      | +                             | muc                         | por2                         | 4a                      | III B                           | B2                                 | Y                    |
| Case 7     | 60 to under 70                | M      | -                             | tub1                        | tub1                         | 1                       | I A                             | B2                                 | ND                   |
| Case 8     | 50 to under 60                | F      | +                             | sig                         | sig                          | 1                       | I A                             | B2                                 | ND                   |
| Case 9     | 70 to under 80                | M      | +                             | tub2                        | tub2                         | 2                       | I B                             | B2                                 | ND                   |
| Case 10    | 70 to under 80                | M      | -                             | por2                        | por2                         | 4a                      | III C                           | B2                                 | ND                   |
| Case 11    | 70 to under 80                | M      | +                             | por2                        | por2                         | 3                       | II B                            | B2                                 | ND                   |
| Case 12    | 60 to under 70                | M      | +                             | tub1                        | tub1                         | 1                       | I A                             | A                                  | ND                   |
| Case 13    | 60 to under 70                | M      | +                             | sig                         | sig                          | 4a                      | IV                              | B2                                 | ND                   |
| Case 14    | 60 to under 70                | M      | -                             | tub2                        | tub2                         | 3                       | II B                            | A                                  | Y                    |
| Case 15    | 70 to under 80                | M      | +                             | por2                        | sig                          | 4a                      | III C                           | A                                  | ND                   |
| Case 16    | 50 to under 60                | M      | -                             | por2                        | por2                         | 4a                      | III C                           | B1                                 | Y                    |
| Case 17    | 60 to under 70                | M      | +                             | tub1                        | por2                         | 4a                      | III A                           | B2                                 | ND                   |
| Case 18    | 60 to under 70                | M      | -                             | tub1                        | por                          | 3                       | II A                            | A                                  | ND                   |
| Case 19    | 60 to under 70                | M      | -                             | tub2                        | tub2                         | 4a                      | III C                           | A                                  | ND                   |
| Case 20    | 70 to under 80                | M      | +                             | por2                        | sig                          | 4a                      | III C                           | A                                  | ND                   |
| Case 21    | 60 to under 70                | F      | +                             | tub2                        | tub2                         | 1                       | I A                             | A                                  | ND                   |
| Case 22    | 60 to under 70                | F      | +                             | tub2                        | tub2                         | 1                       | I B                             | B2                                 | ND                   |
| Case 23    | 50 to under 60                | M      | -                             | tub2                        | por2                         | 3                       | II B                            | B1                                 | ND                   |
| Case 24    | 20 to under 30                | F      | +                             | por2                        | por2                         | 4a                      | III C                           | B2                                 | ND                   |
| Case 25    | 60 to under 70                | M      | +                             | por1                        | por1                         | 4a                      | III C                           | B2                                 | Y                    |
| Case 26    | 70 to under 80                | F      | -                             | por2                        | por2                         | 3                       | II A                            | B1                                 | Y                    |
| Case 27    | 60 to under 70                | F      | +                             | por2                        | por2                         | 4a                      | IV                              | B1                                 | ND                   |
| Case 28    | 50 to under 60                | F      | +                             | tub2                        | por1                         | 2                       | II B                            | B1                                 | ND                   |
| Case 29    | 70 to under 80                | M      | -                             | tub1                        | tub1                         | 4a                      | IV                              | B2                                 | ND                   |
| Case 30    | 60 to under 70                | M      | -                             | por1                        | por1                         | 2                       | I B                             | B2                                 | ND                   |
| Case 31    | 60 to under 70                | M      | -                             | por1                        | por1                         | 1                       | I B                             | B2                                 | Y                    |
| Case 32    | 50 to under 60                | M      | -                             | por2                        | por2                         | 4a                      | III C                           | B2                                 | ND                   |
| Case 33    | 70 to under 80                | M      | +                             | tub1                        | tub1                         | 3                       | III A                           | B2                                 | ND                   |
| Case 34    | 70 to under 80                | M      | -                             | por2                        | sig                          | 4a                      | III C                           | B2                                 | Y                    |
| Case 35    | 70 to under 80                | F      | +                             | tub1                        | por1                         | 4a                      | III B                           | B2                                 | Y                    |
| Case 36    | 60 to under 70                | F      | +                             | tub2                        | tub2                         | 3                       | III A                           | B2                                 | Y                    |
| Case 37    | 50 to under 60                | M      | +                             | tub2                        | por2                         | 4a                      | III C                           | B2                                 | ND                   |
| Case 38    | 80 to under 90                | M      | +                             | pap                         | por                          | 4a                      | III C                           | B1                                 | ND                   |
| Case 39    | 60 to under 70                | M      | +                             | tub2                        | por2                         | 4a                      | III C                           | B2                                 | ND                   |
| Case 40    | 70 to under 80                | M      | +                             | tub2                        | tub2                         | 4a                      | III B                           | A                                  | Y                    |
| Case 41    | 70 to under 80                | M      | -                             | tub1                        | tub1                         | 1                       | I A                             | B2                                 | ND                   |
| Case 42    | 60 to under 70                | M      | +                             | tub1                        | tub1                         | 3                       | II A                            | B1                                 | ND                   |
| Case 43    | 60 to under 70                | M      | -                             | tub2                        | por                          | 3                       | III B                           | B2                                 | Y                    |
| Case 44    | 50 to under 60                | M      | +                             | por1                        | por1                         | 4a                      | III C                           | B2                                 | Y                    |
| Case 45    | 80 to under 90                | F      | -                             | por2                        | por2                         | 4a                      | III C                           | B2                                 | Y                    |
| Case 46    | 30 to under 40                | F      | +                             | sig                         | sig                          | 1                       | I A                             | B2                                 | ND                   |
| Case 47    | 50 to under 60                | M      | +                             | por2                        | sig                          | 4a                      | III A                           | B2                                 | Y                    |
| Case 48    | 50 to under 60                | M      | -                             | sig                         | sig                          | 1                       | I A                             | B2                                 | ND                   |
| Case 49    | 70 to under 80                | M      | +                             | tub1                        | por                          | 1                       | I A                             | A                                  | Y                    |
| Case 50    | 60 to under 70                | F      | +                             | tub2                        | tub2                         | 4a                      | III B                           | A                                  | Y                    |
| Case 51    | 50 to under 60                | M      | +                             | por2                        | sig                          | 1                       | I A                             | B2                                 | ND                   |
| Case 52    | 60 to under 70                | F      | +                             | tub1                        | tub1                         | 1                       | I B                             | A                                  | Y                    |
| Case 53    | 70 to under 80                | M      | -                             | por2                        | por2                         | 3                       | III A                           | A                                  | Y                    |
| Case 54    | 50 to under 60                | M      | +                             | sig                         | sig                          | 1                       | I A                             | B2                                 | ND                   |
| Case 55    | 40 to under 50                | F      | +                             | por2                        | sig                          | 4a                      | III B                           | B1                                 | ND                   |

|          |                 |   |         |      |      |    |       |    |    |
|----------|-----------------|---|---------|------|------|----|-------|----|----|
| Case 56  | 40 to under 50  | M | -       | por2 | por2 | 4a | III C | B1 | Y  |
| Case 57  | 60 to under 70  | F | +       | por2 | sig  | 1  | I A   | B2 | ND |
| Case 58  | 70 to under 80  | F | +       | tub2 | tub2 | 3  | III A | B2 | ND |
| Case 59  | 60 to under 70  | M | -       | tub1 | sig  | 1  | I A   | A  | Y  |
| Case 60  | 60 to under 70  | M | -       | tub2 | tub2 | 2  | I B   | A  | ND |
| Case 61  | 50 to under 60  | M | +       | por2 | por2 | 4a | III C | B2 | Y  |
| Case 62  | 60 to under 70  | M | +       | tub1 | tub1 | 1  | I A   | B2 | Y  |
| Case 63  | 70 to under 80  | M | +       | tub2 | por2 | 3  | III A | A  | Y  |
| Case 64  | 60 to under 70  | M | -       | sig  | sig  | 4a | III C | B1 | Y  |
| Case 65  | 50 to under 60  | F | -       | sig  | sig  | 4a | III C | B2 | Y  |
| Case 66  | 60 to under 70  | M | +       | tub2 | tub2 | 1  | I A   | B2 | Y  |
| Case 67  | 70 to under 80  | F | +       | tub1 | tub2 | 1  | I A   | B2 | Y  |
| Case 68  | 50 to under 60  | F | +       | sig  | sig  | 1  | I A   | B2 | ND |
| Case 69  | 70 to under 80  | M | -       | tub2 | por  | 4a | IV    | B2 | Y  |
| Case 70  | 70 to under 80  | M | +       | tub2 | por2 | 3  | II B  | B2 | Y  |
| Case 71  | 40 to under 50  | F | +       | sig  | sig  | 4a | IV    | B2 | Y  |
| Case 72  | 60 to under 70  | M | +       | tub1 | tub2 | 3  | II B  | B2 | ND |
| Case 73  | 60 to under 70  | M | -       | tub2 | por1 | 3  | III A | A  | Y  |
| Case 74  | 60 to under 70  | F | +       | por1 | por1 | 4a | III A | B2 | Y  |
| Case 75  | 50 to under 60  | M | +       | tub2 | por  | 3  | II B  | B2 | Y  |
| Case 76  | 70 to under 80  | M | +       | tub2 | tub2 | 3  | III A | B2 | Y  |
| Case 77  | 60 to under 70  | M | Unknown | sig  | sig  | 4a | IV    | B2 | Y  |
| Case 78  | 60 to under 70  | M | -       | tub2 | por  | 4a | IV    | B1 | Y  |
| Case 79  | 70 to under 80  | M | Unknown | tub2 | tub2 | 4a | III B | B2 | Y  |
| Case 80  | 60 to under 70  | M | +       | tub2 | por1 | 3  | II B  | B2 | Y  |
| Case 81  | 50 to under 60  | M | +       | por1 | por1 | 3  | II B  | B1 | ND |
| Case 82  | 50 to under 60  | M | +       | por2 | por2 | 4a | II B  | B1 | Y  |
| Case 83  | 40 to under 50  | F | +       | por2 | sig  | 4a | II B  | B2 | Y  |
| Case 84  | 70 to under 80  | M | +       | por2 | por2 | 4a | IV    | B1 | Y  |
| Case 85  | 60 to under 70  | M | +       | por2 | por2 | 4a | II B  | B1 | Y  |
| Case 86  | 70 to under 80  | M | +       | tub2 | por2 | 4b | III C | B2 | ND |
| Case 87  | 60 to under 70  | M | -       | tub2 | tub2 | 3  | III B | B2 | Y  |
| Case 88  | 50 to under 60  | F | -       | sig  | sig  | 4a | III C | B2 | Y  |
| Case 89  | 60 to under 70  | M | -       | por2 | por2 | 4a | III C | B2 | Y  |
| Case 90  | 70 to under 80  | M | +       | tub2 | por2 | 4a | III C | B1 | ND |
| Case 91  | 70 to under 80  | M | +       | tub2 | por1 | 3  | II A  | B2 | Y  |
| Case 92  | 60 to under 70  | M | -       | tub2 | tub2 | 4a | IV    | A  | Y  |
| Case 93  | 40 to under 50  | M | -       | por2 | sig  | 4b | IV    | B2 | Y  |
| Case 94  | 90 to under 100 | M | +       | tub2 | por1 | 4a | III C | B2 | Y  |
| Case 95  | 70 to under 80  | F | +       | tub1 | tub1 | 4a | IV    | B2 | Y  |
| Case 96  | 50 to under 60  | M | -       | tub2 | por2 | 4a | IV    | B2 | Y  |
| Case 97  | 60 to under 70  | M | -       | tub1 | tub2 | 3  | IV    | B2 | Y  |
| Case 98  | 70 to under 80  | F | -       | por2 | sig  | 4a | III C | B2 | Y  |
| Case 99  | 60 to under 70  | M | +       | por2 | por2 | 4a | III A | B1 | Y  |
| Case 100 | 60 to under 70  | F | -       | por1 | por2 | 4a | IV    | B2 | Y  |
| Case 101 | 50 to under 60  | F | +       | por2 | por2 | 4a | IV    | B1 | Y  |
| Case 102 | 40 to under 50  | F | +       | por2 | por2 | 4a | III C | B2 | ND |
| Case 103 | 60 to under 70  | M | +       | muc  | sig  | 4a | III C | A  | Y  |
| Case 104 | 60 to under 70  | F | +       | por2 | por2 | 4a | III C | B2 | Y  |
| Case 105 | 70 to under 80  | M | +       | pap  | tub1 | 4a | III B | B1 | Y  |
| Case 106 | 60 to under 70  | M | +       | muc  | sig  | 4a | III B | B1 | Y  |
| Case 107 | 70 to under 80  | M | +       | tub2 | por2 | 4a | IV    | B2 | Y  |
| Case 108 | 50 to under 60  | M | -       | tub2 | por1 | 4a | III C | B2 | Y  |
| Case 109 | 70 to under 80  | M | +       | tub2 | por2 | 4a | III C | B2 | Y  |

M, male; F, female; pap, papillary adenocarcinoma; tub1, tubular adenocarcinoma (well differentiated type); tub2, tubular adenocarcinoma (moderately differentiated type); por1, poorly differentiated adenocarcinoma (solid type); por2, poorly differentiated adenocarcinoma (non-solid type); sig, signet ring cell carcinoma; muc, mucinous adenocarcinoma; Y, done; ND, not done; NA, not applicable.

<sup>1</sup>If the tumor showed heterogeneity, findings in the predominant area were described. <sup>2</sup>If the tumor showed heterogeneity, the most aggressive features of the tumor were described. <sup>3</sup>Based on The Union for International Cancer Control classification (Ref. 20). <sup>4</sup>In our previous study, 109 patients were clustered into 3 subclusters, Clusters A (n=20), B1 (n=20) and B2 (n=69), based on the genome-wide DNA methylation profile (Ref. 13).

**Supplementary Table 2.** Genes showing significant differences of DNA methylation levels in N samples compared to C samples in Clusters A, B1 and B2 ( $P < 0.05$  for Welch's T test after Bonferroni correction and  $\Delta\beta_{N-C} \geq 0.3$  or  $\Delta\beta_{N-C} \leq -0.3$ )

(A) Genes showing significant differences of DNA methylation levels between N and C samples in Cluster A

| Gene symbol | Probe ID <sup>1</sup> | National Center for<br>Biotechnology Information<br>(NCBI) Gene ID | Chromosome | Gene region <sup>2</sup> | CpG type <sup>3</sup> | $\Delta\beta_{N-C}$ | $P$       |
|-------------|-----------------------|--------------------------------------------------------------------|------------|--------------------------|-----------------------|---------------------|-----------|
| ABCC12      | cg14074641            | 94160                                                              | 16         | TSS1500                  | Open sea              | -3.134E-01          | 2.931E-10 |
| ABCC2       | cg09448875            | 1244                                                               | 10         | TSS200                   | Open sea              | -3.100E-01          | 1.259E-09 |
| ACTL6B      | cg08572611            | 51412                                                              | 7          | Gene body                | Island                | 4.264E-01           | 1.542E-12 |
| ACTN2       | cg21376883            | 88                                                                 | 1          | Gene body                | Island                | 3.157E-01           | 4.898E-16 |
| ADAM12      | cg11668923            | 8038                                                               | 10         | 1st exon/5'UTR           | Island                | 3.558E-01           | 1.123E-11 |
| ADAM12      | cg13488201            | 8038                                                               | 10         | TSS200                   | Island                | 3.088E-01           | 1.632E-14 |
| ADAM19      | cg07540118            | 8728                                                               | 5          | 1st exon/5'UTR           | Island                | 3.437E-01           | 9.498E-07 |
| ADAM23      | cg16778809            | 8745                                                               | 2          | 1st exon/5'UTR           | Island                | 3.157E-01           | 4.493E-04 |
| ADAMTS1     | cg00472814            | 9510                                                               | 21         | 1st exon/5'UTR           | Island                | 3.566E-01           | 4.494E-11 |
| ADAMTS1     | cg11189837            | 9510                                                               | 21         | TSS1500                  | Island                | 3.385E-01           | 3.386E-09 |
| ADAMTS18    | cg03238797            | 170692                                                             | 16         | 1st exon/5'UTR           | Island                | 4.483E-01           | 1.599E-18 |
| ADAMTS2     | cg14409941            | 9509                                                               | 5          | Gene body                | Island                | 4.141E-01           | 2.409E-13 |
| ADAMTS5     | cg08190291            | 11096                                                              | 21         | TSS200                   | Island                | 3.735E-01           | 2.933E-14 |
| ADAMTSL3    | cg11611600            | 57188                                                              | 15         | 5'UTR                    | Island                | 3.370E-01           | 1.164E-09 |
| ADCY4       | cg16761581            | 196883                                                             | 14         | 1st exon                 | Island                | 3.110E-01           | 3.709E-11 |
| ADCY5       | cg13878010            | 111                                                                | 3          | 1st exon                 | Island                | 3.292E-01           | 1.254E-11 |
| ADD2        | cg08132931            | 119                                                                | 2          | 5'UTR                    | Island                | 3.026E-01           | 5.056E-06 |
| ADD2        | cg25631352            | 119                                                                | 2          | TSS200                   | S-Shore               | 3.765E-01           | 5.046E-14 |
| ADHFE1      | cg01988129            | 137872                                                             | 8          | Gene body                | Island                | 5.281E-01           | 1.330E-16 |
| ADRB1       | cg14826456            | 153                                                                | 10         | 1st exon                 | Island                | 3.222E-01           | 4.133E-18 |
| ADRB3       | cg17619823            | 155                                                                | 8          | 1st exon                 | Island                | 3.693E-01           | 4.979E-16 |
| AEBP1       | cg02126753            | 165                                                                | 7          | 1st exon/5'UTR           | Open sea              | 4.023E-01           | 1.729E-10 |
| AGBL4       | cg06744574            | 84871                                                              | 1          | Gene body                | N-Shore               | 3.637E-01           | 3.181E-05 |
| AGTR1       | cg04878152            | 185                                                                | 3          | 5'UTR                    | S-Shore               | 3.428E-01           | 2.686E-15 |
| AIM2        | cg10636246            | 9447                                                               | 1          | TSS1500                  | Open sea              | -3.481E-01          | 8.413E-15 |
| AJAP1       | cg17525406            | 55966                                                              | 1          | Gene body                | Island                | 5.266E-01           | 3.552E-20 |
| AJAP1       | cg20959866            | 55966                                                              | 1          | TSS1500                  | Island                | 3.703E-01           | 6.837E-16 |
| AKAP12      | cg01555431            | 9590                                                               | 6          | Gene body                | Island                | 4.267E-01           | 2.841E-16 |
| ALDH1A2     | cg03365437            | 8854                                                               | 15         | 5'UTR/1st exon           | Island                | 3.378E-01           | 1.027E-15 |
| ALDH1A3     | cg21359747            | 220                                                                | 15         | Gene body                | Island                | 3.833E-01           | 5.430E-11 |
| ALG12       | cg15316289            | 79087                                                              | 22         | 5'UTR                    | N-Shore               | 3.084E-01           | 1.680E-21 |
| ALK         | cg18277754            | 238                                                                | 2          | 5'UTR/1st exon           | Island                | 3.918E-01           | 4.279E-19 |
| ALPL        | cg20645065            | 249                                                                | 1          | 5'UTR                    | Island                | 3.395E-01           | 1.449E-13 |
| ALX4        | cg04988423            | 60529                                                              | 11         | 1st exon                 | Island                | 3.670E-01           | 2.094E-09 |
| AMICA1      | cg07376232            | 120425                                                             | 11         | Gene body/TSS1500        | Open sea              | -3.430E-01          | 3.346E-15 |
| AMPH        | cg10293925            | 273                                                                | 7          | 5'UTR/1st exon           | Island                | 4.993E-01           | 4.195E-15 |
| ANXA13      | cg02800334            | 312                                                                | 8          | TSS1500                  | Open sea              | -3.352E-01          | 4.619E-14 |
| APCDD1L     | cg23418591            | 164284                                                             | 20         | TSS1500                  | S-Shore               | 3.022E-01           | 1.289E-15 |
| ASAM        | cg19096475            | 79827                                                              | 11         | TSS1500                  | Island                | 3.416E-01           | 9.246E-15 |
| ATP10A      | cg19326876            | 57194                                                              | 15         | Gene body                | Island                | 3.022E-01           | 2.859E-14 |
| ATP2B4      | cg22226839            | 493                                                                | 1          | 5'UTR/1st exon           | N-Shelf               | 3.168E-01           | 8.312E-11 |
| ATP8A2      | cg18236477            | 51761                                                              | 13         | Gene body                | Island                | 3.205E-01           | 1.245E-14 |
| ATP8B2      | cg08190044            | 57198                                                              | 1          | 5'UTR                    | Island                | 3.021E-01           | 2.569E-05 |
| ATRNL1      | cg04335339            | 26033                                                              | 10         | TSS200                   | Island                | 3.044E-01           | 6.772E-07 |
| AZGP1       | cg12019109            | 563                                                                | 7          | TSS1500                  | Open sea              | -3.149E-01          | 3.612E-14 |
| B3GALT5     | cg11479877            | 10317                                                              | 21         | 1st exon/5'UTR           | Open sea              | -3.072E-01          | 3.119E-10 |
| B3GAT1      | cg11038843            | 27087                                                              | 11         | 5'UTR                    | Island                | 3.388E-01           | 9.546E-10 |
| BAALC       | cg10918202            | 79870                                                              | 8          | 1st exon                 | Island                | 3.594E-01           | 2.642E-09 |
| BCAN        | cg21475402            | 63827                                                              | 1          | 5'UTR                    | Island                | 3.545E-01           | 3.734E-14 |
| BEND5       | cg06744574            | 79656                                                              | 1          | 1st exon                 | N-Shore               | 3.637E-01           | 3.181E-05 |
| BLNK        | cg16779976            | 29760                                                              | 10         | 1st exon                 | Open sea              | -3.896E-01          | 8.050E-14 |
| BMPR1B      | cg09156233            | 658                                                                | 4          | 5'UTR                    | Island                | 3.608E-01           | 4.712E-14 |
| BNC1        | cg10398682            | 646                                                                | 15         | Gene body                | Island                | 3.287E-01           | 1.712E-16 |
| BNC1        | cg18952647            | 646                                                                | 15         | TSS1500                  | Island                | 4.510E-01           | 1.141E-17 |
| BNC1        | cg19988449            | 646                                                                | 15         | Gene body                | Island                | 3.054E-01           | 3.186E-12 |
| BPI         | cg08254089            | 671                                                                | 20         | Gene body                | Open sea              | -3.262E-01          | 3.254E-16 |
| BPTF        | cg16435601            | 2186                                                               | 17         | 1st exon                 | S-Shore               | -3.605E-01          | 1.417E-19 |
| BRSK2       | cg01468621            | 9024                                                               | 11         | Gene body                | Island                | 3.513E-01           | 1.787E-08 |
| BTG4        | cg01192900            | 54766                                                              | 11         | TSS1500                  | Island                | 3.197E-01           | 3.542E-14 |
| BTG4        | cg22879515            | 54766                                                              | 11         | TSS1500                  | Island                | 3.938E-01           | 6.037E-11 |
| BTG4        | cg23211240            | 54766                                                              | 11         | TSS1500                  | Island                | 3.864E-01           | 3.170E-15 |
| C10orf25    | cg00899659            | 220979                                                             | 10         | Gene body                | N-Shore               | -3.141E-01          | 4.402E-12 |
| C10orf72    | cg02569613            | 196740                                                             | 10         | Gene body                | N-Shore               | 3.379E-01           | 2.608E-14 |
| C14orf132   | cg16539629            | 56967                                                              | 14         | Gene body                | Island                | 3.027E-01           | 1.490E-10 |
| C14orf139   | cg10145926            | 161176                                                             | 14         | Gene body                | Open sea              | -3.008E-01          | 1.364E-14 |
| C14orf162   | cg14912575            | 56936                                                              | 14         | TSS1500                  | Island                | 3.601E-01           | 8.168E-21 |
| C17orf73    | cg03016571            | 55018                                                              | 17         | Gene body                | Open sea              | -4.011E-01          | 3.072E-12 |
| C17orf93    | cg12374721            | 360205                                                             | 17         | TSS1500                  | N-Shore               | 4.215E-01           | 1.130E-14 |
| C1orf229    | cg23695504            | 388759                                                             | 1          | 1st exon                 | Island                | 3.064E-01           | 2.510E-08 |
| C1QL1       | cg13818573            | 10882                                                              | 17         | 1st exon                 | Island                | 3.391E-01           | 2.566E-08 |
| C1QTNF3     | cg18752880            | 114899                                                             | 5          | TSS200                   | Open sea              | 3.048E-01           | 3.340E-14 |
| C8orf56     | cg10918202            | 157556                                                             | 8          | Gene body                | Island                | 3.594E-01           | 2.642E-09 |
| C9orf25     | cg23579062            | 203259                                                             | 9          | Gene body                | Island                | 3.008E-01           | 1.594E-16 |
| CABP7       | cg20256494            | 164633                                                             | 22         | 1st exon                 | Island                | 3.010E-01           | 9.986E-10 |
| CACNA1A     | cg22187630            | 773                                                                | 19         | 1st exon                 | Island                | 3.036E-01           | 2.277E-13 |
| CACNA1G     | cg18454685            | 8913                                                               | 17         | Gene body                | Island                | 3.412E-01           | 3.462E-14 |

|             |            |        |    |                          |          |            |           |
|-------------|------------|--------|----|--------------------------|----------|------------|-----------|
| CACNB2      | cg01805540 | 783    | 10 | 1st exon/5'UTR           | Island   | 4.450E-01  | 1.483E-13 |
| CARTPT      | cg23300372 | 9607   | 5  | Gene body                | Island   | 3.448E-01  | 1.580E-13 |
| CASP2       | cg09243021 | 835    | 7  | TSS1500                  | N-Shore  | 3.739E-01  | 1.158E-22 |
| CASP8       | cg26799474 | 841    | 2  | 5'UTR                    | Open sea | -3.108E-01 | 1.270E-14 |
| CBLN4       | cg25993718 | 140689 | 20 | TSS200                   | Island   | 3.382E-01  | 1.932E-15 |
| CCDC105     | cg09601629 | 126402 | 19 | Gene body                | S-Shore  | 3.083E-01  | 1.796E-12 |
| CCDC141     | cg12501949 | 285025 | 2  | TSS1500                  | Open sea | -3.149E-01 | 1.087E-13 |
| CCDC37      | cg00891278 | 348807 | 3  | 1st exon/5'UTR           | Island   | 3.639E-01  | 4.106E-17 |
| CCDC37      | cg20312228 | 348807 | 3  | TSS200                   | Island   | 3.598E-01  | 2.717E-19 |
| CCL14-CCL15 | cg23743114 | NA     | 17 | Gene body                | Open sea | -4.730E-01 | 4.591E-12 |
| CCL15       | cg23743114 | 6359   | 17 | Gene body                | Open sea | -4.730E-01 | 4.591E-12 |
| CCL28       | cg03077492 | 56477  | 5  | TSS1500                  | Open sea | -3.166E-01 | 6.429E-08 |
| CCNA1       | cg12571423 | 8900   | 13 | 5'UTR/1st exon           | S-Shore  | 3.277E-01  | 2.162E-13 |
| CD209       | cg07608333 | 30835  | 19 | TSS1500                  | Open sea | -3.350E-01 | 2.273E-20 |
| CD53        | cg22325572 | 963    | 1  | 5'UTR                    | Open sea | -3.062E-01 | 3.875E-12 |
| CD8A        | cg17108819 | 925    | 2  | 5'UTR/1st exon/Gene body | Island   | 3.600E-01  | 2.007E-08 |
| CDH11       | cg10065825 | 1009   | 16 | TSS1500                  | Island   | 3.033E-01  | 2.772E-12 |
| CDH11       | cg12163490 | 1009   | 16 | 5'UTR/1st exon           | Island   | 3.265E-01  | 5.739E-16 |
| CDH13       | cg00806490 | 1012   | 16 | Gene body                | Island   | 3.573E-01  | 1.380E-16 |
| CDH17       | cg12038710 | 1015   | 8  | 5'UTR                    | Open sea | -3.367E-01 | 3.750E-09 |
| CDH8        | cg11323198 | 1006   | 16 | 5'UTR                    | Island   | 3.912E-01  | 1.979E-15 |
| CDO1        | cg12880658 | 1036   | 5  | 1st exon/5'UTR           | Island   | 3.101E-01  | 1.090E-10 |
| CEBPG       | cg15046693 | 1054   | 19 | TSS1500                  | N-Shore  | -3.032E-01 | 2.652E-13 |
| CELSR1      | cg06268694 | 9620   | 22 | 1st exon                 | Island   | 4.612E-01  | 1.556E-12 |
| CELSR3      | cg06621358 | 1951   | 3  | 1st exon                 | Island   | 3.109E-01  | 8.215E-17 |
| CENPP       | cg24105685 | 401541 | 9  | Gene body                | Open sea | -3.687E-01 | 4.743E-14 |
| CES3        | cg09407859 | 23491  | 16 | Gene body                | Open sea | -3.385E-01 | 8.025E-16 |
| CGB5        | cg24908058 | 93659  | 19 | 5'UTR/1st exon           | Open sea | 3.050E-01  | 2.790E-19 |
| CHAT        | cg11389172 | 1103   | 10 | 5'UTR                    | Island   | 4.019E-01  | 1.390E-12 |
| CHAT        | cg14008883 | 1103   | 10 | 5'UTR                    | Island   | 3.302E-01  | 4.758E-17 |
| CHD5        | cg08080029 | 26038  | 1  | Gene body                | Island   | 3.246E-01  | 4.535E-05 |
| CHGA        | cg12422450 | 1113   | 14 | Gene body                | Island   | 3.416E-01  | 9.389E-11 |
| CHRNA3      | cg04603031 | 1136   | 15 | 5'UTR/1st exon           | Island   | 3.608E-01  | 3.414E-13 |
| CHST12      | cg03545635 | 55501  | 7  | 5'UTR                    | N-Shore  | -3.644E-01 | 2.570E-08 |
| CLEC11A     | cg20308817 | 6320   | 19 | TSS1500                  | N-Shore  | 3.084E-01  | 1.054E-17 |
| CLEC2D      | cg12810837 | 29121  | 12 | TSS200                   | Open sea | -3.123E-01 | 2.792E-15 |
| CLRN3       | cg23817637 | 119467 | 10 | TSS1500                  | Open sea | -3.350E-01 | 1.916E-18 |
| CMTM2       | cg01683883 | 146225 | 16 | TSS1500                  | Island   | 3.294E-01  | 3.810E-16 |
| CNIH3       | cg00290506 | 149111 | 1  | 1st exon/5'UTR           | Island   | 4.300E-01  | 2.144E-16 |
| CNR1        | cg23276695 | 1268   | 6  | 5'UTR/TSS1500            | Open sea | -3.730E-01 | 3.688E-23 |
| CNRIP1      | cg07080358 | 25927  | 2  | 1st exon                 | Island   | 4.752E-01  | 1.173E-12 |
| CNTNAP2     | cg07028533 | 26047  | 7  | TSS200                   | Island   | 3.054E-01  | 4.910E-13 |
| CNTNAP2     | cg16254309 | 26047  | 7  | Gene body                | S-Shore  | 3.580E-01  | 1.551E-15 |
| COL15A1     | cg19461644 | 1306   | 9  | Gene body                | Island   | 3.837E-01  | 1.664E-17 |
| COL23A1     | cg10730712 | 91522  | 5  | TSS1500                  | S-Shore  | 3.540E-01  | 1.464E-11 |
| COL4A1      | cg27546237 | 1282   | 13 | TSS1500                  | Island   | 3.474E-01  | 1.622E-16 |
| COL4A2      | cg27546237 | 1284   | 13 | Gene body                | Island   | 3.474E-01  | 1.622E-16 |
| COL5A1      | cg26024843 | 1289   | 9  | 1st exon/5'UTR           | Island   | 3.353E-01  | 5.451E-15 |
| COLEC12     | cg19461621 | 81035  | 18 | TSS1500                  | S-Shore  | 3.740E-01  | 7.024E-16 |
| COMP        | cg09949775 | 1311   | 19 | 1st exon/5'UTR           | Island   | 3.753E-01  | 1.905E-18 |
| CPA3        | cg24290574 | 1359   | 3  | 1st exon                 | Open sea | -3.411E-01 | 1.001E-14 |
| CPLX2       | cg19885761 | 10814  | 5  | 5'UTR/1st exon           | Island   | 4.003E-01  | 1.055E-11 |
| CPNE8       | cg23495733 | 144402 | 12 | Gene body                | N-Shore  | 3.371E-01  | 8.043E-11 |
| CPZ         | cg03292388 | 8532   | 4  | 5'UTR/1st exon           | Island   | 3.636E-01  | 1.354E-14 |
| CRELD2      | cg15316289 | 79174  | 22 | TSS1500                  | N-Shore  | 3.084E-01  | 1.680E-21 |
| CRHR2       | cg14896516 | 1395   | 7  | TSS1500                  | Island   | 3.696E-01  | 2.162E-08 |
| CRISPLD1    | cg05624932 | 83690  | 8  | 5'UTR                    | S-Shore  | 3.022E-01  | 4.103E-09 |
| CRMP1       | cg03544320 | 1400   | 4  | 1st exon                 | Island   | 4.317E-01  | 2.834E-06 |
| CRYBA4      | cg15559737 | 1413   | 22 | TSS1500                  | Open sea | 3.083E-01  | 1.159E-19 |
| CSMD1       | cg22619018 | 64478  | 8  | TSS1500                  | Island   | 5.625E-01  | 1.414E-20 |
| CSTL1       | cg20171451 | 128817 | 20 | TSS1500                  | Open sea | 3.458E-01  | 2.375E-28 |
| CTNNA3      | cg00132141 | 29119  | 10 | TSS1500                  | Open sea | -3.505E-01 | 3.507E-24 |
| CTNND2      | cg25302419 | 1501   | 5  | 5'UTR/1st exon           | Island   | 3.236E-01  | 1.700E-13 |
| CTSF        | cg06817264 | 8722   | 11 | Gene body                | Island   | 3.203E-01  | 5.013E-14 |
| CUX2        | cg09229912 | 23316  | 12 | 1st exon/5'UTR           | Island   | 4.852E-01  | 3.580E-20 |
| CUX2        | cg17190608 | 23316  | 12 | TSS1500                  | Island   | 3.328E-01  | 9.690E-12 |
| CWH43       | cg25484904 | 80157  | 4  | TSS1500                  | Island   | 3.057E-01  | 4.895E-14 |
| CXCR1       | cg13519373 | 3577   | 2  | 5'UTR                    | Open sea | -3.319E-01 | 1.384E-16 |
| CYP26B1     | cg04884908 | 56603  | 2  | 1st exon                 | Island   | 3.220E-01  | 9.772E-15 |
| CYP4F11     | cg24655310 | 57834  | 19 | 1st exon/Gene body       | Open sea | 3.137E-01  | 2.074E-12 |
| DAB1        | cg00848728 | 1600   | 1  | 5'UTR/1st exon           | Island   | 3.039E-01  | 6.355E-12 |
| DBC1        | cg25935911 | 1620   | 9  | TSS1500                  | S-Shore  | 3.805E-01  | 7.514E-19 |
| DCC         | cg01839464 | 1630   | 18 | Gene body                | Island   | 3.774E-01  | 3.468E-15 |
| DCC         | cg23242898 | 1630   | 18 | Gene body                | N-Shore  | 3.529E-01  | 2.018E-12 |
| DCHS1       | cg01086895 | 8642   | 11 | 5'UTR                    | Island   | 3.446E-01  | 1.167E-12 |
| DES         | cg18182399 | 1674   | 2  | 1st exon/5'UTR           | N-Shore  | 3.296E-01  | 1.672E-10 |
| DGKI        | cg06277657 | 9162   | 7  | TSS1500                  | Island   | 3.372E-01  | 5.070E-15 |
| DHFR        | cg08244028 | 1719   | 5  | Gene body                | N-Shore  | -3.055E-01 | 4.314E-19 |
| DLK1        | cg17412258 | 8788   | 14 | TSS1500                  | Island   | 3.757E-01  | 5.557E-16 |
| DLX5        | cg11997899 | 1749   | 7  | TSS200                   | Island   | 3.187E-01  | 2.391E-13 |
| DLX5        | cg13344740 | 1749   | 7  | 5'UTR/1st exon           | Island   | 3.370E-01  | 5.517E-19 |
| DLX5        | cg13462129 | 1749   | 7  | Gene body                | Island   | 3.077E-01  | 7.091E-13 |

|         |            |        |    |                          |          |            |           |
|---------|------------|--------|----|--------------------------|----------|------------|-----------|
| DMBX1   | cg09914444 | 127343 | 1  | TSS1500                  | Open sea | -3.149E-01 | 1.761E-13 |
| DMKN    | cg10133777 | 93099  | 19 | TSS1500                  | Open sea | -3.565E-01 | 1.358E-18 |
| DMRT1   | cg03168582 | 1761   | 9  | 1st exon                 | Island   | 5.442E-01  | 7.063E-17 |
| DMRT2   | cg00250430 | 10655  | 9  | 5'UTR                    | N-Shore  | 3.536E-01  | 7.895E-14 |
| DMRT3   | cg12420104 | 58524  | 9  | 1st exon                 | Island   | 3.158E-01  | 1.004E-08 |
| DNAI1   | cg23579062 | 27019  | 9  | TSS1500                  | Island   | 3.008E-01  | 1.594E-16 |
| DNM3    | cg23391785 | 26052  | 1  | Gene body                | Island   | 4.034E-01  | 4.754E-09 |
| DPYS    | cg10303487 | 1807   | 8  | 1st exon                 | Island   | 5.085E-01  | 2.962E-15 |
| DPYSL4  | cg12109455 | 10570  | 10 | Gene body                | Island   | 3.460E-01  | 1.080E-17 |
| DPYSL5  | cg26195812 | 56896  | 2  | 5'UTR                    | Island   | 3.439E-01  | 1.814E-10 |
| DSCR10  | cg17233935 | 259234 | 21 | TSS1500                  | Open sea | -3.119E-01 | 5.121E-18 |
| DTX1    | cg11939071 | 1840   | 12 | TSS1500                  | Island   | 4.022E-01  | 2.224E-13 |
| DUSP2   | cg01148741 | 1844   | 2  | TSS1500                  | Island   | -3.629E-01 | 8.973E-17 |
| DYRK2   | cg21281799 | 8445   | 12 | TSS1500                  | N-Shore  | -3.178E-01 | 2.005E-16 |
| ECEL1   | cg25431974 | 9427   | 2  | TSS1500                  | Island   | 3.510E-01  | 1.301E-20 |
| ECM2    | cg24105685 | 1842   | 9  | TSS1500                  | Open sea | -3.687E-01 | 4.743E-14 |
| EDIL3   | cg03478689 | 10085  | 5  | TSS200                   | Island   | 3.081E-01  | 3.007E-12 |
| EDIL3   | cg16773899 | 10085  | 5  | 5'UTR/1st exon           | Island   | 3.793E-01  | 2.435E-18 |
| EDNRB   | cg23316360 | 1910   | 13 | 5'UTR/1st exon           | Island   | 4.647E-01  | 4.961E-22 |
| EFCAB1  | cg22836229 | 79645  | 8  | 5'UTR/1st exon/Gene body | Island   | 3.794E-01  | 4.440E-16 |
| EIF4E3  | cg13562542 | 317649 | 3  | 5'UTR                    | Island   | 4.131E-01  | 2.276E-12 |
| ELMO1   | cg08453021 | 9844   | 7  | TSS200                   | Island   | 3.607E-01  | 2.734E-12 |
| ELMO1   | cg19118812 | 9844   | 7  | 5'UTR/1st exon           | Island   | 3.867E-01  | 2.146E-06 |
| ELN     | cg05822532 | 2006   | 7  | 1st exon                 | Open sea | 3.351E-01  | 2.654E-11 |
| ELOVL2  | cg13562911 | 54898  | 6  | Gene body                | Island   | 4.574E-01  | 5.321E-11 |
| ELOVL4  | cg13297865 | 6785   | 6  | TSS200                   | Island   | 4.112E-01  | 1.285E-11 |
| ENO2    | cg13334990 | 2026   | 12 | 1st exon/5'UTR           | Island   | 3.211E-01  | 8.855E-13 |
| EPB41L3 | cg00027083 | 23136  | 18 | 5'UTR                    | Island   | 3.882E-01  | 2.079E-08 |
| EPHA10  | cg07447922 | 284656 | 1  | TSS200                   | Island   | 3.025E-01  | 1.039E-09 |
| EPHA10  | cg12128017 | 284656 | 1  | 1st exon/5'UTR           | Island   | 3.444E-01  | 4.748E-15 |
| EPHA5   | cg18420965 | 2044   | 4  | Gene body                | N-Shore  | 3.974E-01  | 3.080E-15 |
| EPHA7   | cg08001895 | 2045   | 6  | TSS1500                  | Island   | 3.097E-01  | 3.740E-13 |
| EPO     | cg08575537 | 2056   | 7  | Gene body                | Island   | 4.831E-01  | 2.574E-12 |
| ERBB4   | cg07015629 | 2066   | 2  | 1st exon                 | Island   | 3.482E-01  | 2.457E-09 |
| ERBB4   | cg20637307 | 2066   | 2  | TSS1500                  | S-Shore  | 3.399E-01  | 3.730E-07 |
| ERC2    | cg04759439 | 26059  | 3  | TSS1500                  | Island   | 4.210E-01  | 8.390E-20 |
| ESR1    | cg20253551 | 2099   | 6  | Gene body/1st exon       | Island   | 3.026E-01  | 1.170E-08 |
| EYA4    | cg01805282 | 2070   | 6  | 5'UTR                    | Island   | 3.580E-01  | 3.240E-16 |
| EYA4    | cg24176563 | 2070   | 6  | 5'UTR/1st exon           | Island   | 3.419E-01  | 3.325E-16 |
| EYA4    | cg26656135 | 2070   | 6  | 5'UTR/1st exon           | Island   | 3.217E-01  | 1.662E-11 |
| FAM123A | cg22029275 | 219287 | 13 | 1st exon/5'UTR           | Island   | 4.059E-01  | 4.139E-10 |
| FAM150A | cg17162024 | 389658 | 8  | TSS1500                  | Island   | 3.982E-01  | 2.577E-15 |
| FAM19A4 | cg13921352 | 151647 | 3  | TSS200                   | Island   | 4.235E-01  | 4.778E-14 |
| FAM20A  | cg01697732 | 54757  | 17 | TSS1500                  | Island   | 3.622E-01  | 1.810E-05 |
| FAM20A  | cg13591701 | 54757  | 17 | 5'UTR/1st exon           | Island   | 3.386E-01  | 1.041E-08 |
| FAM43B  | cg20404387 | 163933 | 1  | 1st exon/5'UTR           | Island   | 3.492E-01  | 2.629E-18 |
| FBN1    | cg18671950 | 2200   | 15 | Gene body                | Island   | 3.997E-01  | 5.791E-17 |
| FBN2    | cg25084878 | 2201   | 5  | 1st exon/5'UTR           | Island   | 4.707E-01  | 1.596E-22 |
| FBXO39  | cg20723355 | 162517 | 17 | 5'UTR                    | Island   | 4.299E-01  | 2.458E-15 |
| FCRL3   | cg25259754 | 115352 | 1  | Gene body                | Open sea | -3.125E-01 | 1.957E-14 |
| FERD3L  | cg25691167 | 222894 | 7  | 1st exon                 | Island   | 3.874E-01  | 1.203E-12 |
| FGF10   | cg20387341 | 2255   | 5  | TSS1500                  | Open sea | 3.533E-01  | 3.150E-17 |
| FGF2    | cg25583174 | 2247   | 4  | 1st exon                 | Island   | 3.399E-01  | 3.117E-07 |
| FGF3    | cg15337897 | 2248   | 11 | TSS1500                  | Island   | 3.852E-01  | 5.492E-16 |
| FGF5    | cg18638496 | 2250   | 4  | TSS1500                  | N-Shore  | 3.020E-01  | 9.911E-11 |
| FGF8    | cg16584573 | 2253   | 10 | 1st exon                 | Island   | 3.568E-01  | 2.774E-14 |
| FGFR1   | cg08722122 | 2260   | 8  | TSS1500                  | S-Shore  | 3.413E-01  | 1.260E-19 |
| FLI1    | cg17872757 | 2313   | 11 | Gene body/5'UTR          | Island   | 3.627E-01  | 4.243E-06 |
| FLRT2   | cg17410236 | 23768  | 14 | 1st exon/5'UTR           | Island   | 4.594E-01  | 6.224E-19 |
| FLT3    | cg07017374 | 2322   | 13 | Gene body                | Island   | 4.505E-01  | 2.205E-11 |
| FLT4    | cg00489401 | 2324   | 5  | Gene body                | Island   | 3.956E-01  | 2.105E-11 |
| FOXD3   | cg22815110 | 27022  | 1  | 1st exon                 | Island   | 3.960E-01  | 2.608E-17 |
| FOXG1   | cg10300684 | 2290   | 14 | 1st exon/5'UTR           | N-Shore  | 3.354E-01  | 2.392E-12 |
| FOXI2   | cg13929328 | 399823 | 10 | 1st exon                 | Island   | 3.248E-01  | 3.938E-14 |
| FOXI2   | cg19884262 | 399823 | 10 | 1st exon                 | Island   | 3.590E-01  | 5.855E-18 |
| FOXL1   | cg06995715 | 2300   | 16 | 1st exon                 | Island   | 3.651E-01  | 2.907E-14 |
| FZD10   | cg23054883 | 11211  | 12 | 1st exon                 | Island   | 3.774E-01  | 5.723E-17 |
| FZD2    | cg25228126 | 2535   | 17 | 1st exon                 | Island   | 3.068E-01  | 2.823E-11 |
| GABBR2  | cg02058918 | 9568   | 9  | 1st exon                 | Island   | 3.732E-01  | 6.081E-09 |
| GAL3ST3 | cg21238818 | 89792  | 11 | 5'UTR/1st exon           | Island   | 3.597E-01  | 1.152E-20 |
| GALR1   | cg00662556 | 2587   | 18 | Gene body                | Island   | 3.239E-01  | 6.726E-16 |
| GALR1   | cg04534765 | 2587   | 18 | 1st exon/5'UTR           | Island   | 4.577E-01  | 2.273E-10 |
| GALR1   | cg10486998 | 2587   | 18 | TSS1500                  | Island   | 3.477E-01  | 1.913E-14 |
| GALR1   | cg15343119 | 2587   | 18 | TSS1500                  | Island   | 3.135E-01  | 7.630E-12 |
| GALR1   | cg26721264 | 2587   | 18 | TSS1500                  | Island   | 4.736E-01  | 5.178E-19 |
| GBGT1   | cg01169778 | 26301  | 9  | 5'UTR                    | Island   | 4.378E-01  | 5.420E-30 |
| GBX2    | cg06954481 | 2637   | 2  | 1st exon                 | Island   | 4.186E-01  | 3.894E-14 |
| GCM1    | cg20967220 | 8521   | 6  | TSS200                   | Open sea | -3.036E-01 | 4.060E-09 |
| GCM2    | cg02844545 | 9247   | 6  | 1st exon/5'UTR           | Island   | 3.256E-01  | 1.284E-16 |
| GDAP1L1 | cg04448487 | 78997  | 20 | TSS200                   | Island   | 3.782E-01  | 1.216E-17 |
| GDNF    | cg07442479 | 2668   | 5  | 1st exon/5'UTR           | Island   | 3.947E-01  | 1.962E-16 |
| GDPD3   | cg13543096 | 79153  | 16 | TSS1500                  | Open sea | 3.382E-01  | 2.043E-14 |

|           |            |        |    |                          |          |            |           |
|-----------|------------|--------|----|--------------------------|----------|------------|-----------|
| GFPT2     | cg21937886 | 9945   | 5  | Gene body                | Island   | 4.225E-01  | 5.880E-13 |
| GJD2      | cg21053529 | 57369  | 15 | TSS200                   | Island   | 3.151E-01  | 7.360E-13 |
| GLB1L3    | cg19674669 | 112937 | 11 | Gene body                | Island   | 3.535E-01  | 1.281E-14 |
| GLRB      | cg09688546 | 2743   | 4  | 1st exon/TSS200/5'UTR    | Island   | 3.319E-01  | 6.110E-12 |
| GNA15     | cg26482939 | 2769   | 19 | Gene body                | Open sea | -3.641E-01 | 3.883E-20 |
| GNG4      | cg09649610 | 2786   | 1  | TSS1500/1st exon/5'UTR   | Island   | 3.186E-01  | 7.556E-10 |
| GPC6      | cg16792800 | 10082  | 13 | 1st exon/5'UTR           | Island   | 3.568E-01  | 2.285E-10 |
| GPR128    | cg23855093 | 84873  | 3  | 1st exon                 | Open sea | -3.210E-01 | 1.324E-16 |
| GPR26     | cg02757432 | 2849   | 10 | 1st exon                 | Island   | 3.712E-01  | 1.125E-17 |
| GPR27     | cg13562542 | 2850   | 3  | 1st exon                 | Island   | 4.131E-01  | 2.276E-12 |
| GPR6      | cg26252167 | 2830   | 6  | 1st exon                 | Island   | 3.318E-01  | 4.015E-10 |
| GPR75     | cg19664945 | 10936  | 2  | TSS1500                  | S-Shore  | 3.371E-01  | 1.513E-10 |
| GPSM1     | cg14934821 | 26086  | 9  | Gene body                | Island   | -3.273E-01 | 1.137E-12 |
| GRASP     | cg04034767 | 160622 | 12 | 1st exon                 | Island   | 3.743E-01  | 2.621E-06 |
| GREB1     | cg10612997 | 9687   | 2  | TSS1500                  | Open sea | -3.081E-01 | 9.437E-12 |
| GRIA2     | cg25148589 | 2891   | 4  | 1st exon/5'UTR           | N-Shore  | 3.379E-01  | 3.857E-18 |
| GRIA4     | cg09980522 | 2893   | 11 | Gene body/1st exon       | S-Shore  | 3.587E-01  | 4.601E-17 |
| GRIA4     | cg19343464 | 2893   | 11 | 5'UTR/1st exon           | S-Shore  | 3.114E-01  | 3.496E-12 |
| GRIK2     | cg26316946 | 2898   | 6  | 1st exon/5'UTR           | Island   | 3.353E-01  | 2.221E-16 |
| GRIK3     | cg06722633 | 2899   | 1  | Gene body                | Island   | 4.165E-01  | 5.716E-19 |
| GRM6      | cg14859460 | 2916   | 5  | TSS200                   | Island   | 3.813E-01  | 3.837E-14 |
| GRM6      | cg15674997 | 2916   | 5  | Gene body                | Island   | 3.147E-01  | 3.353E-26 |
| GSC2      | cg26599006 | 2928   | 22 | Gene body                | Island   | 3.715E-01  | 3.561E-13 |
| GSX1      | cg26609631 | 219409 | 13 | 5'UTR/1st exon           | Island   | 3.755E-01  | 3.768E-07 |
| GUCY1A2   | cg23984434 | 2977   | 11 | 1st exon                 | Island   | 3.579E-01  | 5.124E-09 |
| GUCY2C    | cg18754342 | 2984   | 12 | 1st exon                 | Open sea | -4.310E-01 | 4.579E-11 |
| HAND2     | cg01580681 | 9464   | 4  | 1st exon                 | N-Shore  | 3.421E-01  | 9.012E-16 |
| HBB       | cg14544583 | 3043   | 11 | TSS1500                  | Open sea | -3.026E-01 | 9.517E-17 |
| HBQ1      | cg07703401 | 3049   | 16 | 1st exon/5'UTR           | Island   | 3.750E-01  | 4.571E-15 |
| HCN1      | cg11285003 | 348980 | 5  | TSS1500                  | S-Shore  | 3.044E-01  | 2.327E-13 |
| HCN4      | cg24396745 | 10021  | 15 | 1st exon/5'UTR           | Island   | 3.035E-01  | 5.366E-16 |
| HHIP      | cg14580567 | 64399  | 4  | 1st exon/5'UTR           | Island   | 3.779E-01  | 1.482E-16 |
| HHIPL1    | cg06834875 | 84439  | 14 | TSS1500                  | Island   | -3.364E-01 | 3.247E-15 |
| HIF3A     | cg07022477 | 64344  | 19 | TSS1500                  | N-Shore  | -3.705E-01 | 4.645E-22 |
| HIST1H2BO | cg12629515 | 8348   | 6  | TSS1500                  | N-Shore  | -3.592E-01 | 2.267E-17 |
| HIST1H3J  | cg12629515 | 8356   | 6  | TSS1500                  | N-Shore  | -3.592E-01 | 2.267E-17 |
| HKR1      | cg12024906 | 284459 | 19 | 1st exon/5'UTR           | Island   | 3.361E-01  | 5.352E-13 |
| HOXA9     | cg01381846 | 3205   | 7  | 1st exon                 | Island   | 3.684E-01  | 3.446E-12 |
| HOXA9     | cg26521404 | 3205   | 7  | 1st exon                 | Island   | 4.665E-01  | 4.891E-10 |
| HOXA9     | cg27009703 | 3205   | 7  | 1st exon                 | Island   | 3.058E-01  | 1.768E-08 |
| HOXB1     | cg17233506 | 3211   | 17 | TSS200                   | Island   | 3.045E-01  | 5.017E-15 |
| HOXB4     | cg08089301 | 3214   | 17 | 1st exon                 | Island   | 4.669E-01  | 3.037E-12 |
| HOXB4     | cg14458834 | 3214   | 17 | 1st exon                 | Island   | 4.206E-01  | 2.434E-12 |
| HOXB4     | cg21546671 | 3214   | 17 | 1st exon                 | Island   | 3.928E-01  | 7.972E-10 |
| HOXC11    | cg22709192 | 3227   | 12 | 5'UTR/1st exon           | Island   | 3.975E-01  | 6.371E-20 |
| HOXD1     | cg19001226 | 3231   | 2  | 1st exon/5'UTR           | Island   | 4.355E-01  | 2.077E-15 |
| HOXD12    | cg23130254 | 3238   | 2  | 1st exon                 | Island   | 3.460E-01  | 3.576E-16 |
| HOXD8     | cg15520279 | 3234   | 2  | 5'UTR/1st exon           | Island   | 3.553E-01  | 5.323E-13 |
| HOXD9     | cg14991487 | 3235   | 2  | TSS200                   | Island   | 4.121E-01  | 1.887E-16 |
| HS3ST2    | cg19064258 | 9956   | 16 | 1st exon                 | Island   | 3.453E-01  | 2.635E-12 |
| HS3ST3A1  | cg07480567 | 9955   | 17 | 1st exon/5'UTR           | Island   | 3.968E-01  | 4.021E-17 |
| HS3ST3A1  | cg18236079 | 9955   | 17 | TSS1500                  | S-Shore  | 3.511E-01  | 6.319E-10 |
| HSPA2     | cg27120999 | 3306   | 14 | 1st exon                 | Island   | 3.684E-01  | 3.709E-21 |
| HSPB3     | cg20169062 | 8988   | 5  | TSS200                   | Open sea | -3.157E-01 | 1.476E-13 |
| HTR7      | cg06291867 | 3363   | 10 | 1st exon                 | Island   | 3.270E-01  | 2.112E-16 |
| IGF2      | cg02166532 | 3481   | 11 | Gene body/5'UTR/1st exon | Island   | 3.318E-01  | 1.617E-17 |
| IGF2      | cg13791131 | 3481   | 11 | 5'UTR                    | Island   | 3.991E-01  | 7.673E-16 |
| IGF2      | cg20792294 | 3481   | 11 | 5'UTR                    | Island   | 3.390E-01  | 5.274E-14 |
| IGF2      | cg25574024 | 3481   | 11 | 5'UTR                    | Island   | 4.295E-01  | 3.262E-16 |
| IGF2AS    | cg13791131 | 51214  | 11 | Gene body                | Island   | 3.991E-01  | 7.673E-16 |
| IGF2AS    | cg20792294 | 51214  | 11 | Gene body                | Island   | 3.390E-01  | 5.274E-14 |
| IGF2AS    | cg25574024 | 51214  | 11 | Gene body                | Island   | 4.295E-01  | 3.262E-16 |
| IGFBP3    | cg06713098 | 3486   | 7  | 1st exon                 | Island   | 3.264E-01  | 5.318E-11 |
| IGFBP3    | cg15898840 | 3486   | 7  | 1st exon/5'UTR           | Island   | 4.349E-01  | 5.296E-13 |
| IGFBP7    | cg03876618 | 3490   | 4  | Gene body                | Island   | 3.217E-01  | 5.638E-15 |
| IGSF21    | cg23349790 | 84966  | 1  | 5'UTR/1st exon           | Island   | 5.612E-01  | 9.642E-11 |
| IL1B      | cg07935264 | 3553   | 2  | TSS200                   | Open sea | -4.414E-01 | 7.665E-18 |
| IL1R2     | cg17142183 | 7850   | 2  | TSS200                   | Open sea | -3.164E-01 | 7.826E-11 |
| IL21      | cg00136405 | 59067  | 4  | 5'UTR/1st exon           | Open sea | -3.024E-01 | 2.409E-15 |
| INS-IGF2  | cg02166532 | 723961 | 11 | Gene body                | Island   | 3.318E-01  | 1.617E-17 |
| INS-IGF2  | cg13791131 | 723961 | 11 | Gene body                | Island   | 3.991E-01  | 7.673E-16 |
| INS-IGF2  | cg20792294 | 723961 | 11 | Gene body                | Island   | 3.390E-01  | 5.274E-14 |
| INS-IGF2  | cg25574024 | 723961 | 11 | Gene body                | Island   | 4.295E-01  | 3.262E-16 |
| IRX4      | cg00243313 | 50805  | 5  | TSS1500                  | Island   | 3.310E-01  | 6.303E-09 |
| IRX4      | cg03963198 | 50805  | 5  | 5'UTR/1st exon           | Island   | 4.631E-01  | 5.236E-17 |
| ITGA9     | cg25870420 | 3680   | 3  | 1st exon                 | Island   | 3.528E-01  | 1.383E-08 |
| IVL       | cg25082710 | 3713   | 1  | TSS1500                  | Open sea | -3.071E-01 | 3.020E-14 |
| JAM2      | cg03382304 | 58494  | 21 | 1st exon                 | Island   | 3.331E-01  | 5.353E-08 |
| JOSD2     | cg13521229 | 126119 | 19 | Gene body                | N-Shore  | 3.305E-01  | 1.894E-17 |
| KCNA1     | cg08832227 | 3736   | 12 | Gene body                | Island   | 3.070E-01  | 2.330E-13 |
| KCNA4     | cg15183083 | 3739   | 11 | 1st exon/5'UTR           | N-Shore  | 3.186E-01  | 3.970E-14 |
| KCNA5     | cg20792062 | 3741   | 12 | 5'UTR/1st exon           | Island   | 3.169E-01  | 1.929E-14 |

|              |            |        |    |                          |          |            |           |
|--------------|------------|--------|----|--------------------------|----------|------------|-----------|
| KCNA6        | cg26162582 | 3742   | 12 | 5'UTR/1st exon           | Island   | 3.693E-01  | 3.082E-10 |
| KCNB1        | cg24507762 | 3745   | 20 | TSS1500                  | N-Shore  | 3.297E-01  | 1.448E-16 |
| KCNG1        | cg24924779 | 3755   | 20 | TSS1500                  | Island   | 3.614E-01  | 6.095E-15 |
| KCNH2        | cg19781133 | 3757   | 7  | 1st exon                 | Island   | 3.215E-01  | 1.469E-05 |
| KCNH7        | cg19965810 | 90134  | 2  | TSS1500                  | Open sea | 3.196E-01  | 1.288E-14 |
| KCNQ2        | cg08003150 | 3785   | 20 | 1st exon                 | Island   | 3.368E-01  | 1.025E-07 |
| KCNQ3        | cg27016990 | 3786   | 8  | 1st exon                 | Island   | 3.981E-01  | 5.706E-04 |
| KCNQ5        | cg24687051 | 56479  | 6  | 1st exon                 | Island   | 4.760E-01  | 2.314E-10 |
| KCTD8        | cg12300353 | 386617 | 4  | 1st exon                 | Island   | 3.497E-01  | 2.400E-12 |
| KDR          | cg14323109 | 3791   | 4  | TSS200                   | Island   | 3.050E-01  | 1.142E-09 |
| KHDRBS2      | cg18239753 | 202559 | 6  | 1st exon/5'UTR           | Island   | 3.732E-01  | 1.596E-18 |
| KIAA0355     | cg10087081 | 9710   | 19 | 5'UTR                    | Open sea | -3.570E-01 | 2.329E-12 |
| KIAA0355     | cg21665774 | 9710   | 19 | 5'UTR                    | Open sea | -3.392E-01 | 1.496E-11 |
| KIF17        | cg15613048 | 57576  | 1  | 1st exon                 | Island   | 3.664E-01  | 1.359E-15 |
| KIF1A        | cg14662379 | 547    | 2  | 5'UTR                    | Island   | 3.660E-01  | 1.835E-18 |
| KMO          | cg18087514 | 8564   | 1  | Gene body                | Open sea | -3.032E-01 | 2.605E-08 |
| KRT80        | cg24506604 | 144501 | 12 | Gene body                | Open sea | -3.180E-01 | 2.666E-16 |
| KRT85        | cg21518208 | 3891   | 12 | TSS200                   | S-Shore  | -3.604E-01 | 6.327E-19 |
| L3MBTL4      | cg17688525 | 91133  | 18 | TSS200                   | S-Shore  | 3.502E-01  | 4.536E-10 |
| LACRT        | cg07643942 | 90070  | 12 | TSS1500                  | Open sea | -3.682E-01 | 9.645E-21 |
| LAMA1        | cg07846220 | 284217 | 18 | 1st exon                 | Island   | 4.927E-01  | 1.455E-12 |
| LAT2         | cg03375002 | 7462   | 7  | TSS1500                  | Open sea | -3.841E-01 | 2.375E-18 |
| LCT          | cg21375825 | 3938   | 2  | 1st exon                 | Open sea | -3.658E-01 | 4.513E-07 |
| LEP          | cg19594666 | 3952   | 7  | TSS200                   | Island   | 3.105E-01  | 3.475E-10 |
| LHX1         | cg22660578 | 3975   | 17 | TSS1500                  | Island   | 4.073E-01  | 3.852E-13 |
| LIN28        | cg16530429 | 79727  | 1  | Gene body                | Island   | 3.065E-01  | 1.049E-10 |
| LIN7A        | cg05647859 | 8825   | 12 | TSS200                   | S-Shore  | 4.499E-01  | 4.734E-18 |
| LMX1B        | cg18453621 | 4010   | 9  | Gene body                | Island   | 4.269E-01  | 1.641E-12 |
| LOC100192379 | cg05396987 | NA     | 4  | Gene body                | Island   | 3.011E-01  | 2.869E-14 |
| LOC100271831 | cg13543096 | NA     | 16 | TSS200                   | Open sea | 3.382E-01  | 2.043E-14 |
| LOC100302652 | cg19664945 | NA     | 2  | TSS200                   | S-Shore  | 3.371E-01  | 1.513E-10 |
| LOC283392    | cg13663218 | NA     | 12 | Gene body                | Island   | 3.444E-01  | 3.204E-17 |
| LOC286002    | cg14646244 | NA     | 7  | Gene body                | N-Shore  | -3.211E-01 | 4.680E-14 |
| LOC389458    | cg01870826 | NA     | 7  | Gene body                | Island   | 3.133E-01  | 1.351E-13 |
| LPPR3        | cg15640375 | 79948  | 19 | 5'UTR                    | Island   | 3.370E-01  | 3.983E-16 |
| LRFN5        | cg04784672 | 145581 | 14 | 5'UTR/1st exon           | S-Shore  | 3.262E-01  | 1.405E-13 |
| LRTOMT       | cg23256971 | 220074 | 11 | 5'UTR/Gene body          | S-Shore  | 3.617E-01  | 4.528E-30 |
| LVRN         | cg25044651 | 206338 | 5  | 1st exon                 | Island   | 3.449E-01  | 2.711E-16 |
| MAFB         | cg02497758 | 9935   | 20 | 1st exon                 | Island   | 3.251E-01  | 1.249E-12 |
| MAGI2        | cg05902852 | 9863   | 7  | 1st exon                 | Island   | 3.081E-01  | 3.683E-15 |
| MAL          | cg06668300 | 4118   | 2  | Gene body                | Island   | 3.365E-01  | 2.391E-09 |
| MALL         | cg01615704 | 7851   | 2  | 5'UTR/1st exon           | Island   | 3.388E-01  | 8.165E-14 |
| MCHR2        | cg20134215 | 84539  | 6  | 5'UTR                    | Island   | 3.276E-01  | 8.324E-17 |
| MEP1B        | cg01941619 | 4225   | 18 | 1st exon                 | Open sea | -3.251E-01 | 5.059E-19 |
| MGAT5B       | cg00654814 | 146664 | 10 | 1st exon/5'UTR           | Island   | 3.781E-01  | 5.565E-12 |
| MGMT         | cg07638938 | 4255   | 10 | Gene body                | Open sea | 4.344E-01  | 7.115E-29 |
| MGST1        | cg11203041 | 4257   | 12 | TSS1500/5'UTR            | Open sea | -3.436E-01 | 2.041E-17 |
| MIR34B       | cg01192900 | 407041 | 11 | Gene body                | Island   | 3.197E-01  | 3.542E-14 |
| MIR34B       | cg22879515 | 407041 | 11 | TSS200                   | Island   | 3.938E-01  | 6.037E-11 |
| MIR34B       | cg23211240 | 407041 | 11 | TSS200                   | Island   | 3.864E-01  | 3.170E-15 |
| MIR34C       | cg01192900 | 407042 | 11 | TSS1500                  | Island   | 3.197E-01  | 3.542E-14 |
| MIR34C       | cg22879515 | 407042 | 11 | TSS1500                  | Island   | 3.938E-01  | 6.037E-11 |
| MIR34C       | cg23211240 | 407042 | 11 | TSS1500                  | Island   | 3.864E-01  | 3.170E-15 |
| MLNR         | cg02620013 | 2862   | 13 | 1st exon                 | Island   | 3.331E-01  | 5.564E-16 |
| MMP2         | cg14400118 | 4313   | 16 | 1st exon/5'UTR           | N-Shore  | 3.051E-01  | 2.692E-13 |
| MMRN1        | cg21092324 | 22915  | 4  | 1st exon                 | Open sea | -3.281E-01 | 1.732E-14 |
| MN1          | cg27269921 | 4330   | 22 | 5'UTR/1st exon           | Island   | 4.175E-01  | 1.421E-13 |
| MSC          | cg23710218 | 9242   | 8  | 1st exon/5'UTR           | Island   | 3.518E-01  | 1.637E-20 |
| MSH3         | cg08244028 | 4437   | 5  | TSS1500                  | N-Shore  | -3.055E-01 | 4.314E-19 |
| MSX1         | cg09748975 | 4487   | 4  | Gene body                | Island   | 3.464E-01  | 3.855E-08 |
| MTNR1B       | cg15842276 | 4544   | 11 | TSS200                   | N-Shore  | 3.046E-01  | 5.053E-16 |
| MYCBP        | cg12792157 | 26292  | 1  | 5'UTR/1st exon           | Island   | -4.198E-01 | 3.856E-24 |
| MYCT1        | cg02830467 | 80177  | 6  | TSS1500                  | Open sea | -3.020E-01 | 1.878E-17 |
| MYO3A        | cg08441170 | 53904  | 10 | 1st exon/5'UTR           | Island   | 4.396E-01  | 2.203E-11 |
| MYO3A        | cg23771603 | 53904  | 10 | 5'UTR                    | Island   | 4.840E-01  | 3.770E-14 |
| MYOD1        | cg07271264 | 4654   | 11 | TSS200                   | Island   | 3.010E-01  | 1.031E-09 |
| MYOD1        | cg18555440 | 4654   | 11 | 1st exon                 | Island   | 3.241E-01  | 2.078E-18 |
| NALCN        | cg02932669 | 259232 | 13 | 5'UTR                    | Island   | 3.167E-01  | 1.532E-12 |
| NALCN        | cg15202954 | 259232 | 13 | TSS200                   | Island   | 4.072E-01  | 5.858E-17 |
| NAT2         | cg12639234 | 10     | 8  | 5'UTR                    | S-Shelf  | -3.814E-01 | 1.308E-15 |
| NAT8L        | cg21269934 | 339983 | 4  | TSS1500                  | Island   | 3.679E-01  | 3.219E-21 |
| NAV1         | cg25167447 | 89796  | 1  | TSS1500                  | Island   | 3.570E-01  | 1.021E-13 |
| NCAPH        | cg01906055 | 23397  | 2  | TSS1500                  | N-Shore  | -3.559E-01 | 9.470E-23 |
| NCRNA00181   | cg22568540 | 503538 | 19 | Gene body/5'UTR/1st exon | N-Shelf  | 3.450E-01  | 4.832E-22 |
| NEFL         | cg13266631 | 4747   | 8  | TSS1500                  | S-Shore  | 3.143E-01  | 5.873E-12 |
| NEFM         | cg18267374 | 4741   | 8  | TSS1500/5'UTR/1st exon   | Island   | 3.152E-01  | 3.310E-13 |
| NEFM         | cg23290344 | 4741   | 8  | TSS1500/1st exon         | Island   | 4.233E-01  | 4.974E-10 |
| NETO1        | cg26186727 | 81832  | 18 | 1st exon/5'UTR           | Island   | 3.483E-01  | 4.513E-12 |
| NEU1         | cg14976276 | 4758   | 6  | 5'UTR/1st exon           | Island   | 3.216E-01  | 8.561E-06 |
| NEUROG1      | cg04330449 | 4762   | 5  | 1st exon                 | Island   | 4.250E-01  | 2.998E-11 |
| NEUROG1      | cg04897683 | 4762   | 5  | 5'UTR/1st exon           | Island   | 3.437E-01  | 5.509E-15 |
| NEUROG1      | cg11248413 | 4762   | 5  | TSS200                   | Island   | 3.378E-01  | 4.757E-13 |

|          |            |        |    |                          |          |            |           |
|----------|------------|--------|----|--------------------------|----------|------------|-----------|
| NFASC    | cg22571530 | 23114  | 1  | 5'UTR                    | Island   | 3.167E-01  | 6.148E-09 |
| NHLH2    | cg22427279 | 4808   | 1  | TSS1500                  | S-Shelf  | -3.098E-01 | 5.316E-12 |
| NID2     | cg22881914 | 22795  | 14 | TSS1500                  | Island   | 4.235E-01  | 9.897E-16 |
| NIPSNAP1 | cg13797031 | 8508   | 22 | TSS1500                  | S-Shore  | -3.482E-01 | 8.643E-11 |
| NKAIN2   | cg21787291 | 154215 | 6  | 5'UTR/1st exon           | Island   | 3.243E-01  | 1.134E-07 |
| NKX2-8   | cg17685628 | 26257  | 14 | 5'UTR/1st exon           | Island   | 3.155E-01  | 4.262E-13 |
| NKX6-2   | cg08441806 | 84504  | 10 | 1st exon                 | Island   | 3.369E-01  | 1.421E-09 |
| NLGN2    | cg15660077 | 57555  | 17 | 1st exon                 | N-Shore  | 3.269E-01  | 3.313E-22 |
| NOL4     | cg06722216 | 8715   | 18 | 1st exon                 | Island   | 3.397E-01  | 5.592E-15 |
| NOS1     | cg03538436 | 4842   | 12 | 5'UTR/1st exon           | Island   | 3.675E-01  | 6.528E-17 |
| NPAS2    | cg14383135 | 4862   | 2  | 5'UTR                    | Island   | 3.170E-01  | 5.941E-06 |
| NPR      | cg12876594 | 4882   | 9  | TSS1500                  | Island   | 4.236E-01  | 9.983E-14 |
| NPR2     | cg24194775 | 4882   | 9  | TSS1500                  | N-Shore  | 4.823E-01  | 1.440E-12 |
| NPTX2    | cg00548268 | 4885   | 7  | TSS1500                  | Island   | 3.563E-01  | 2.349E-18 |
| NPY5R    | cg18438777 | 4889   | 4  | 5'UTR                    | Island   | 4.095E-01  | 1.342E-17 |
| NR3C1    | cg08818984 | 2908   | 5  | 1st exon/5'UTR           | Open sea | -3.474E-01 | 2.131E-10 |
| NRG1     | cg17457560 | 3084   | 8  | 1st exon/5'UTR/Gene body | Island   | 3.649E-01  | 8.202E-14 |
| NTM      | cg11965370 | 50863  | 11 | 1st exon/5'UTR/Gene body | Island   | 4.107E-01  | 5.147E-17 |
| NTM      | cg20881910 | 50863  | 11 | TSS1500/Gene body        | Island   | 4.161E-01  | 3.489E-18 |
| NTRK3    | cg14384532 | 4916   | 15 | TSS1500                  | Island   | 3.273E-01  | 2.881E-16 |
| NTSR1    | cg03567830 | 4923   | 20 | TSS1500                  | Island   | 3.422E-01  | 3.519E-11 |
| NUDT15   | cg11473104 | 55270  | 13 | TSS200                   | N-Shore  | 3.120E-01  | 2.433E-14 |
| NUMA1    | cg23256971 | 4926   | 11 | TSS1500                  | S-Shore  | 3.617E-01  | 4.528E-30 |
| OLFM4    | cg12582008 | 10562  | 13 | Gene body                | Open sea | -3.622E-01 | 2.892E-12 |
| OPRK1    | cg25990647 | 4986   | 8  | 5'UTR/1st exon           | Island   | 4.390E-01  | 6.730E-14 |
| OR10J1   | cg15700197 | 26476  | 1  | TSS1500                  | Open sea | -3.063E-01 | 1.774E-11 |
| OR51B4   | cg06353345 | 79339  | 11 | 1st exon                 | Open sea | -3.207E-01 | 4.182E-21 |
| OTOP1    | cg14882700 | 133060 | 4  | 1st exon                 | Island   | 3.978E-01  | 5.978E-15 |
| PALM     | cg19912436 | 5064   | 19 | TSS200                   | N-Shore  | 3.721E-01  | 1.299E-08 |
| PAX7     | cg07536847 | 5081   | 1  | TSS1500                  | Island   | 3.307E-01  | 9.781E-13 |
| PAX7     | cg11428724 | 5081   | 1  | 5'UTR/1st exon           | Island   | 4.800E-01  | 2.064E-18 |
| PCDHA1   | cg12629325 | 56147  | 5  | Gene body                | Island   | 5.365E-01  | 7.217E-21 |
| PCDHA1   | cg18902090 | 56147  | 5  | Gene body                | Island   | 3.129E-01  | 5.483E-14 |
| PCDHA10  | cg12629325 | 56139  | 5  | Gene body                | Island   | 5.365E-01  | 7.217E-21 |
| PCDHA10  | cg18902090 | 56139  | 5  | Gene body                | Island   | 3.129E-01  | 5.483E-14 |
| PCDHA11  | cg12629325 | 56138  | 5  | Gene body                | Island   | 5.365E-01  | 7.217E-21 |
| PCDHA11  | cg18902090 | 56138  | 5  | Gene body                | Island   | 3.129E-01  | 5.483E-14 |
| PCDHA12  | cg12629325 | 56137  | 5  | Gene body                | Island   | 5.365E-01  | 7.217E-21 |
| PCDHA12  | cg18902090 | 56137  | 5  | Gene body                | Island   | 3.129E-01  | 5.483E-14 |
| PCDHA13  | cg12629325 | 56136  | 5  | Gene body                | Island   | 5.365E-01  | 7.217E-21 |
| PCDHA13  | cg18902090 | 56136  | 5  | Gene body                | Island   | 3.129E-01  | 5.483E-14 |
| PCDHA2   | cg12629325 | 56146  | 5  | Gene body                | Island   | 5.365E-01  | 7.217E-21 |
| PCDHA2   | cg18902090 | 56146  | 5  | Gene body                | Island   | 3.129E-01  | 5.483E-14 |
| PCDHA3   | cg12629325 | 56145  | 5  | Gene body                | Island   | 5.365E-01  | 7.217E-21 |
| PCDHA3   | cg18902090 | 56145  | 5  | Gene body                | Island   | 3.129E-01  | 5.483E-14 |
| PCDHA4   | cg12629325 | 56144  | 5  | Gene body                | Island   | 5.365E-01  | 7.217E-21 |
| PCDHA4   | cg18902090 | 56144  | 5  | Gene body                | Island   | 3.129E-01  | 5.483E-14 |
| PCDHA5   | cg12629325 | 56143  | 5  | Gene body                | Island   | 5.365E-01  | 7.217E-21 |
| PCDHA5   | cg18902090 | 56143  | 5  | Gene body                | Island   | 3.129E-01  | 5.483E-14 |
| PCDHA6   | cg12629325 | 56142  | 5  | Gene body                | Island   | 5.365E-01  | 7.217E-21 |
| PCDHA6   | cg18902090 | 56142  | 5  | Gene body                | Island   | 3.129E-01  | 5.483E-14 |
| PCDHA7   | cg12629325 | 56141  | 5  | Gene body                | Island   | 5.365E-01  | 7.217E-21 |
| PCDHA7   | cg18902090 | 56141  | 5  | Gene body                | Island   | 3.129E-01  | 5.483E-14 |
| PCDHA8   | cg12629325 | 56140  | 5  | Gene body                | Island   | 5.365E-01  | 7.217E-21 |
| PCDHA8   | cg18902090 | 56140  | 5  | Gene body                | Island   | 3.129E-01  | 5.483E-14 |
| PCDHA9   | cg12629325 | 9752   | 5  | Gene body                | Island   | 5.365E-01  | 7.217E-21 |
| PCDHA9   | cg18902090 | 9752   | 5  | Gene body                | Island   | 3.129E-01  | 5.483E-14 |
| PCDHAC1  | cg12629325 | 56135  | 5  | 1st exon/5'UTR           | Island   | 5.365E-01  | 7.217E-21 |
| PCDHAC1  | cg18902090 | 56135  | 5  | TSS200                   | Island   | 3.129E-01  | 5.483E-14 |
| PCSK1    | cg09786257 | 5122   | 5  | 1st exon                 | N-Shore  | 3.032E-01  | 1.846E-18 |
| PCSK6    | cg20249919 | 5046   | 15 | 1st exon                 | Island   | 5.384E-01  | 9.503E-15 |
| PDE4B    | cg26963271 | 5142   | 1  | 5'UTR                    | S-Shore  | 3.922E-01  | 2.421E-16 |
| PDE4C    | cg17861230 | 5143   | 19 | Gene body                | Island   | 3.976E-01  | 3.026E-11 |
| PDGFC    | cg20937139 | 56034  | 4  | TSS1500                  | Island   | 3.004E-01  | 5.019E-09 |
| PDPN     | cg10743104 | 10630  | 1  | TSS200                   | Island   | 3.343E-01  | 2.793E-12 |
| PHACTR3  | cg20357628 | 116154 | 20 | 5'UTR/1st exon           | Island   | 4.681E-01  | 4.028E-15 |
| PHF21B   | cg01775414 | 112885 | 22 | 1st exon/Gene body       | Island   | 3.726E-01  | 1.797E-10 |
| PHOX2A   | cg08876932 | 401    | 11 | TSS1500                  | Island   | 3.080E-01  | 4.805E-13 |
| PHOX2A   | cg18722841 | 401    | 11 | 1st exon                 | Island   | 3.033E-01  | 2.641E-12 |
| PKDREJ   | cg11377136 | 10343  | 22 | 1st exon                 | Island   | 5.020E-01  | 6.211E-13 |
| PLA2G7   | cg18630040 | 7941   | 6  | 1st exon/5'UTR           | Island   | 3.456E-01  | 1.962E-12 |
| PLEKHF1  | cg05512099 | 79156  | 19 | TSS1500                  | N-Shore  | -4.225E-01 | 1.285E-21 |
| PNMAL1   | cg17296166 | 55228  | 19 | 5'UTR                    | Island   | 3.641E-01  | 1.210E-12 |
| POU3F3   | cg20291049 | 5455   | 2  | 1st exon                 | Island   | 3.252E-01  | 8.042E-13 |
| POU4F2   | cg13262687 | 5458   | 4  | TSS1500                  | Island   | 3.071E-01  | 5.486E-11 |
| POU4F2   | cg24199834 | 5458   | 4  | 1st exon/5'UTR           | Island   | 3.872E-01  | 5.458E-17 |
| POU4F3   | cg18482268 | 5459   | 5  | Gene body                | Island   | 3.124E-01  | 2.415E-12 |
| PPP1R14D | cg23382741 | 54866  | 15 | TSS1500                  | Open sea | -3.008E-01 | 1.380E-13 |
| PRAC     | cg12374721 | 84366  | 17 | Gene body                | N-Shore  | 4.215E-01  | 1.130E-14 |
| PRDM12   | cg09191327 | 59335  | 9  | 1st exon                 | Island   | 3.501E-01  | 4.814E-10 |
| PRICKLE1 | cg16041660 | 144165 | 12 | 5'UTR/1st exon           | Island   | 3.713E-01  | 1.560E-09 |
| PRKAR1B  | cg13577076 | 5575   | 7  | 5'UTR/TSS1500            | S-Shore  | 3.723E-01  | 1.061E-09 |



|            |            |        |    |                          |          |            |           |
|------------|------------|--------|----|--------------------------|----------|------------|-----------|
| PRLHR      | cg15748507 | 2834   | 10 | Gene body                | Island   | 3.230E-01  | 2.733E-16 |
| PSMB9      | cg03465320 | 5698   | 6  | Gene body                | S-Shore  | -3.006E-01 | 2.675E-10 |
| PSME2      | cg05874478 | 5721   | 14 | 1st exon                 | N-Shore  | -3.291E-01 | 3.476E-22 |
| PTF1A      | cg11438428 | 256297 | 10 | 1st exon                 | Island   | 3.822E-01  | 1.027E-16 |
| PTGDR      | cg09516965 | 5729   | 14 | 1st exon/5'UTR           | Island   | 4.481E-01  | 4.762E-17 |
| PTH2R      | cg25057743 | 5746   | 2  | TSS200                   | Island   | 3.472E-01  | 2.768E-20 |
| PTPRM      | cg01946574 | 5797   | 18 | Gene body                | Island   | 3.372E-01  | 1.178E-09 |
| PTPRN      | cg10140638 | 5798   | 2  | TSS200                   | Island   | 3.082E-01  | 1.113E-14 |
| PTPRT      | cg13168820 | 11122  | 20 | 1st exon                 | Island   | 3.590E-01  | 1.174E-13 |
| PXDN       | cg12164282 | 7837   | 2  | 1st exon                 | Island   | 4.670E-01  | 4.359E-13 |
| PXDN       | cg14037665 | 7837   | 2  | TSS1500                  | Island   | 3.770E-01  | 2.947E-12 |
| PYCARD     | cg12100791 | 29108  | 16 | TSS200                   | S-Shore  | -3.578E-01 | 1.146E-11 |
| PYGO1      | cg19850348 | 26108  | 15 | Gene body                | Island   | 3.703E-01  | 1.730E-10 |
| QRFPR      | cg00015770 | 84109  | 4  | 1st exon/5'UTR           | Island   | 3.085E-01  | 2.342E-15 |
| RAB32      | cg23833452 | 10981  | 6  | TSS200                   | Island   | 3.079E-01  | 2.018E-10 |
| RASGRF2    | cg09952204 | 5924   | 5  | 1st exon                 | Island   | 3.006E-01  | 4.013E-07 |
| RELN       | cg17923358 | 5649   | 7  | 1st exon                 | Island   | 3.372E-01  | 2.022E-14 |
| RGS6       | cg03188118 | 9628   | 14 | 5'UTR/1st exon           | S-Shore  | 3.257E-01  | 1.587E-13 |
| RIC3       | cg08383315 | 79608  | 11 | 1st exon/5'UTR           | Island   | 3.414E-01  | 1.214E-14 |
| RIMBP2     | cg24272907 | 23504  | 12 | TSS1500                  | Open sea | -3.031E-01 | 1.113E-15 |
| RNF207     | cg00030047 | 388591 | 1  | Gene body                | N-Shore  | 3.682E-01  | 1.511E-17 |
| RNF217     | cg24298280 | 154214 | 6  | 5'UTR                    | Open sea | -3.264E-01 | 1.085E-16 |
| RNF31      | cg05874478 | 55072  | 14 | TSS1500                  | N-Shore  | -3.291E-01 | 3.476E-22 |
| RNH1       | cg06417962 | 6050   | 11 | TSS1500                  | Island   | 3.125E-01  | 1.829E-16 |
| RPL36      | cg25136310 | 25873  | 19 | 1st exon/Gene body       | Island   | -3.130E-01 | 2.409E-35 |
| RPRM       | cg27420236 | 56475  | 2  | 3'UTR/1st exon           | Island   | 3.303E-01  | 9.857E-09 |
| RSPO2      | cg14070647 | 340419 | 8  | 5'UTR                    | Island   | 3.121E-01  | 8.853E-11 |
| RYR2       | cg11657808 | 6262   | 1  | Gene body                | Island   | 4.779E-01  | 1.457E-17 |
| SALL1      | cg22674717 | 6299   | 16 | TSS1500                  | Island   | 3.031E-01  | 6.762E-11 |
| SALL3      | cg15191648 | 27164  | 18 | TSS200                   | Island   | 3.584E-01  | 8.363E-12 |
| SCARF2     | cg14785479 | 91179  | 22 | TSS1500                  | Island   | 4.217E-01  | 3.551E-20 |
| SCNN1B     | cg23113963 | 6338   | 16 | TSS1500                  | Island   | 3.438E-01  | 4.539E-12 |
| SEC31B     | cg20831708 | 25956  | 10 | 5'UTR                    | Island   | 3.106E-01  | 6.830E-09 |
| SFRP1      | cg13398291 | 6422   | 8  | 1st exon                 | Island   | 4.311E-01  | 1.569E-18 |
| SFRP1      | cg15839448 | 6422   | 8  | 1st exon                 | Island   | 3.900E-01  | 4.585E-16 |
| SFRP1      | cg22418909 | 6422   | 8  | 1st exon/5'UTR           | Island   | 4.067E-01  | 1.192E-13 |
| SFRP2      | cg23207990 | 6423   | 4  | TSS1500                  | Island   | 3.350E-01  | 5.834E-13 |
| SH3GL3     | cg22946150 | 6457   | 15 | Gene body/1st exon/5'UTR | Island   | 4.302E-01  | 6.937E-14 |
| SHD        | cg26646370 | 56961  | 19 | 5'UTR/1st exon           | Island   | 3.136E-01  | 1.533E-03 |
| SIRPB1     | cg09577651 | 10326  | 20 | TSS200                   | Open sea | -3.011E-01 | 2.398E-14 |
| SIX6       | cg14611174 | 4990   | 14 | TSS200                   | Island   | 3.062E-01  | 1.253E-14 |
| SIX6       | cg19456540 | 4990   | 14 | 1st exon                 | Island   | 4.241E-01  | 2.627E-14 |
| SLC12A5    | cg22752533 | 57468  | 20 | 1st exon/5'UTR/Gene body | Island   | 4.013E-01  | 2.594E-10 |
| SLC13A5    | cg16652063 | 284111 | 17 | 5'UTR/1st exon           | Island   | 3.126E-01  | 1.518E-13 |
| SLC13A5    | cg22040627 | 284111 | 17 | TSS1500                  | Island   | 3.477E-01  | 1.148E-12 |
| SLC16A12   | cg09186006 | 387700 | 10 | 1st exon/5'UTR           | Island   | 3.842E-01  | 3.419E-14 |
| SLC16A12   | cg12005098 | 387700 | 10 | TSS200                   | Island   | 3.737E-01  | 8.940E-13 |
| SLC18A3    | cg11389172 | 6572   | 10 | TSS200                   | Island   | 4.019E-01  | 1.390E-12 |
| SLC18A3    | cg14008883 | 6572   | 10 | 1st exon                 | Island   | 3.302E-01  | 4.758E-17 |
| SLC22A12   | cg07220939 | 116085 | 11 | 1st exon/5'UTR           | Open sea | -3.584E-01 | 1.786E-07 |
| SLC22A18   | cg03336167 | 5002   | 11 | Gene body                | Island   | 5.169E-01  | 3.669E-17 |
| SLC22A18   | cg16873863 | 5002   | 11 | 5'UTR                    | N-Shelf  | -3.477E-01 | 1.290E-14 |
| SLC22A18AS | cg16873863 | 5003   | 11 | 5'UTR                    | N-Shelf  | -3.477E-01 | 1.290E-14 |
| SLC26A3    | cg04996020 | 1811   | 7  | TSS1500                  | Open sea | -3.884E-01 | 2.060E-19 |
| SLC26A4    | cg14646244 | 5172   | 7  | TSS1500                  | N-Shore  | -3.211E-01 | 4.680E-14 |
| SLC27A6    | cg07103493 | 28965  | 5  | 5'UTR/1st exon           | Island   | 3.481E-01  | 1.286E-18 |
| SLC30A2    | cg07766612 | 7780   | 1  | TSS1500                  | Island   | 3.189E-01  | 4.980E-08 |
| SLC30A8    | cg23338195 | 169026 | 8  | TSS1500                  | Open sea | -3.261E-01 | 1.740E-14 |
| SLC32A1    | cg08535373 | 140679 | 20 | TSS1500                  | Island   | 3.441E-01  | 2.607E-14 |
| SLC35F3    | cg25437385 | 148641 | 1  | 1st exon                 | Island   | 3.954E-01  | 4.737E-11 |
| SLC3A1     | cg02192965 | 6519   | 2  | 1st exon                 | Open sea | -3.964E-01 | 2.784E-12 |
| SLC5A7     | cg16232126 | 60482  | 2  | 1st exon/5'UTR           | Island   | 3.273E-01  | 1.609E-11 |
| SLC5A8     | cg10141715 | 160728 | 12 | 1st exon                 | Island   | 3.430E-01  | 3.229E-15 |
| SLC6A1     | cg11021744 | 6529   | 3  | TSS200                   | N-Shore  | 3.348E-01  | 7.324E-13 |
| SLC6A2     | cg04490714 | 6530   | 16 | 1st exon/5'UTR           | Island   | 4.257E-01  | 4.846E-21 |
| SLC6A2     | cg10362591 | 6530   | 16 | TSS1500                  | Island   | 4.406E-01  | 7.356E-15 |
| SLCO1B1    | cg00995065 | 10599  | 12 | TSS1500                  | Open sea | -3.182E-01 | 3.525E-17 |
| SLIT2      | cg18972811 | 9353   | 4  | TSS1500                  | Island   | 3.146E-01  | 1.401E-15 |
| SLIT3      | cg11732619 | 6586   | 5  | 5'UTR/1st exon           | Island   | 3.764E-01  | 5.172E-17 |
| SLITRK1    | cg07104706 | 114798 | 13 | 1st exon/5'UTR           | S-Shelf  | 3.009E-01  | 1.002E-11 |
| SLITRK5    | cg09083627 | 26050  | 13 | TSS1500                  | Island   | 4.792E-01  | 4.400E-16 |
| SMPD3      | cg00891541 | 55512  | 16 | 5'UTR                    | Island   | 3.257E-01  | 2.695E-08 |
| SMPD3      | cg10556064 | 55512  | 16 | 5'UTR                    | Island   | 3.144E-01  | 1.341E-11 |
| SNAP91     | cg21688264 | 9892   | 6  | Gene body/5'UTR          | Island   | 4.252E-01  | 1.739E-15 |
| SNCAIP     | cg04684516 | 9627   | 5  | 1st exon/5'UTR           | Island   | 3.331E-01  | 3.393E-14 |
| SNN        | cg09816471 | 8303   | 16 | TSS1500                  | Island   | 3.218E-01  | 4.190E-17 |
| SNRPN      | cg02171545 | 6638   | 15 | 5'UTR                    | Island   | 3.136E-01  | 5.048E-15 |
| SNRPN      | cg24993443 | 6638   | 15 | 5'UTR                    | Island   | 3.075E-01  | 4.534E-21 |
| SNX32      | cg19018097 | 254122 | 11 | TSS200                   | Island   | 3.053E-01  | 6.092E-11 |
| SORCS3     | cg09551147 | 22986  | 10 | TSS1500                  | Island   | 4.143E-01  | 1.531E-12 |
| SORCS3     | cg16787600 | 22986  | 10 | 1st exon/5'UTR           | Island   | 4.767E-01  | 1.011E-18 |
| SOX1       | cg06675478 | 6656   | 13 | TSS200                   | Island   | 3.127E-01  | 3.997E-19 |

|           |            |        |    |                        |          |            |           |
|-----------|------------|--------|----|------------------------|----------|------------|-----------|
| SOX11     | cg08432727 | 6664   | 2  | TSS1500                | N-Shore  | 3.384E-01  | 1.442E-15 |
| SOX11     | cg20008332 | 6664   | 2  | 1st exon               | Island   | 4.461E-01  | 8.141E-21 |
| SPAG6     | cg06908778 | 9576   | 10 | Gene body              | Island   | 3.325E-01  | 3.416E-16 |
| SPDYA     | cg04786857 | 245711 | 2  | 5'UTR                  | Island   | 3.587E-01  | 2.594E-17 |
| SPOCK1    | cg12832649 | 6695   | 5  | 5'UTR                  | Island   | 3.780E-01  | 4.222E-11 |
| SPSB4     | cg22036988 | 92369  | 3  | TSS1500                | Island   | 3.430E-01  | 1.118E-08 |
| SRD5A2    | cg15403517 | 6716   | 2  | TSS1500                | Island   | 3.079E-01  | 4.614E-12 |
| SRD5A2    | cg19502744 | 6716   | 2  | 1st exon               | Island   | 3.869E-01  | 4.875E-18 |
| SST       | cg02164046 | 6750   | 3  | 1st exon/5'UTR         | Island   | 3.327E-01  | 8.059E-13 |
| SSTR4     | cg17586860 | 6754   | 20 | TSS200                 | Island   | 4.107E-01  | 2.296E-17 |
| ST6GAL2   | cg04434339 | 84620  | 2  | 1st exon/5'UTR/TSS1500 | Island   | 3.236E-01  | 2.251E-11 |
| STK38     | cg02964385 | 11329  | 6  | TSS1500                | S-Shore  | -3.556E-01 | 1.269E-10 |
| SUMO3     | cg21053323 | 6612   | 21 | Gene body              | Island   | 3.070E-01  | 5.115E-14 |
| SYT6      | cg05368341 | 148281 | 1  | 5'UTR/1st exon         | Island   | 3.004E-01  | 1.344E-11 |
| SYT9      | cg08185661 | 143425 | 11 | 1st exon               | Island   | 3.743E-01  | 3.406E-13 |
| TAP1      | cg03465320 | 6890   | 6  | TSS1500                | S-Shore  | -3.006E-01 | 2.675E-10 |
| TAS1R1    | cg14186992 | 80835  | 1  | 3'UTR/Gene body        | Island   | 3.016E-01  | 1.147E-18 |
| TCERG1L   | cg03943081 | 256536 | 10 | TSS1500                | Island   | 3.635E-01  | 7.307E-17 |
| TCP10L    | cg20857253 | 140290 | 21 | 5'UTR                  | Open sea | -3.334E-01 | 2.192E-17 |
| TEX15     | cg20939319 | 56154  | 8  | TSS1500                | Open sea | -3.614E-01 | 2.885E-20 |
| TFPI2     | cg23141855 | 7980   | 7  | Gene body              | Island   | 3.060E-01  | 1.494E-10 |
| TFPI2     | cg23686014 | 7980   | 7  | 1st exon               | Island   | 3.073E-01  | 2.546E-08 |
| TLX3      | cg25720804 | 30012  | 5  | 1st exon               | Island   | 4.427E-01  | 4.137E-13 |
| TM6SF1    | cg14696396 | 53346  | 15 | 1st exon               | Island   | 4.422E-01  | 6.394E-11 |
| TMEFF2    | cg06856528 | 23671  | 2  | 5'UTR/1st exon         | Island   | 3.150E-01  | 5.301E-14 |
| TMEM132D  | cg03469054 | 121256 | 12 | 1st exon               | Island   | 3.280E-01  | 1.414E-13 |
| TMEM132D  | cg13234863 | 121256 | 12 | TSS1500                | Island   | 3.193E-01  | 1.936E-14 |
| TMEM132E  | cg18338311 | 124842 | 17 | 1st exon/5'UTR         | Island   | 3.870E-01  | 8.651E-13 |
| TMEM139   | cg09243021 | 135932 | 7  | 3'UTR                  | N-Shore  | 3.739E-01  | 1.158E-22 |
| TMEM155   | cg05396987 | 132332 | 4  | 1st exon/5'UTR         | Island   | 3.011E-01  | 2.869E-14 |
| TMEM179   | cg03734874 | 388021 | 14 | TSS1500                | Island   | 3.991E-01  | 1.059E-16 |
| TMPRSS3   | cg01214847 | 64699  | 21 | 1st exon/5'UTR         | Open sea | -3.202E-01 | 4.296E-14 |
| TMPRSS3   | cg25608949 | 64699  | 21 | TSS200                 | Open sea | -3.047E-01 | 1.037E-13 |
| TNFRSF10A | cg26530341 | 8797   | 8  | TSS1500                | S-Shore  | -4.388E-01 | 5.739E-18 |
| TP73      | cg00565688 | 7161   | 1  | TSS1500                | Island   | 3.916E-01  | 8.553E-17 |
| TRAM1L1   | cg05807991 | 133022 | 4  | TSS200                 | Island   | 3.587E-01  | 1.175E-11 |
| TREML2    | cg19005210 | 79865  | 6  | TSS200                 | Open sea | -3.534E-01 | 5.393E-20 |
| TRH       | cg01009664 | 7200   | 3  | 5'UTR/1st exon         | Island   | 3.896E-01  | 4.954E-15 |
| TRHDE     | cg13663218 | 29953  | 12 | 1st exon               | Island   | 3.444E-01  | 3.204E-17 |
| TRHR      | cg26989103 | 7201   | 8  | TSS200                 | Open sea | -3.923E-01 | 3.706E-16 |
| TRIM31    | cg00679556 | 11074  | 6  | 5'UTR                  | Open sea | -3.276E-01 | 1.498E-12 |
| TRIM31    | cg15238224 | 11074  | 6  | TSS1500                | Open sea | -3.277E-01 | 1.774E-13 |
| TRIM40    | cg09196959 | 135644 | 6  | TSS200                 | Open sea | -3.472E-01 | 4.272E-17 |
| TRIM58    | cg07533148 | 25893  | 1  | 1st exon               | Island   | 4.020E-01  | 1.051E-08 |
| TRIM63    | cg13998293 | 84676  | 1  | TSS1500                | Open sea | -3.176E-01 | 3.507E-18 |
| TRPA1     | cg01610488 | 8989   | 8  | TSS200                 | Island   | 4.190E-01  | 6.580E-14 |
| TRPM2     | cg08191854 | 7226   | 21 | TSS200                 | Open sea | -3.600E-01 | 2.055E-15 |
| TSPYL5    | cg15747595 | 85453  | 8  | 1st exon               | Island   | 3.020E-01  | 1.725E-12 |
| TUBB8     | cg26675077 | 347688 | 10 | TSS1500/1st exon/5'UTR | S-Shore  | 3.074E-01  | 1.607E-21 |
| TWIST1    | cg20052718 | 7291   | 7  | 1st exon               | Island   | 4.046E-01  | 4.676E-19 |
| TWIST1    | cg24446548 | 7291   | 7  | 1st exon/5'UTR         | Island   | 4.197E-01  | 2.786E-08 |
| UCN       | cg04527918 | 7349   | 2  | TSS200                 | Island   | 3.799E-01  | 5.647E-21 |
| UNC5C     | cg10520887 | 8633   | 4  | 5'UTR/1st exon         | Island   | 3.280E-01  | 1.524E-12 |
| UNC5C     | cg13265789 | 8633   | 4  | TSS1500                | Island   | 3.865E-01  | 7.089E-16 |
| UNC80     | cg14419187 | 285175 | 2  | Gene body              | S-Shore  | 4.142E-01  | 4.047E-15 |
| UTF1      | cg03755123 | 8433   | 10 | TSS1500                | Island   | 3.945E-01  | 8.608E-21 |
| UTF1      | cg09053680 | 8433   | 10 | 1st exon               | Island   | 4.708E-01  | 1.380E-10 |
| VHL       | cg16869108 | 7428   | 3  | Gene body              | S-Shore  | -3.780E-01 | 7.847E-20 |
| VHL       | cg24092914 | 7428   | 3  | Gene body              | S-Shore  | -3.655E-01 | 4.328E-16 |
| VIM       | cg12874092 | 7431   | 10 | Gene body              | Island   | 3.710E-01  | 2.348E-07 |
| VIPR2     | cg18349835 | 7434   | 7  | Gene body              | Island   | 4.607E-01  | 2.350E-13 |
| VNN1      | cg00852964 | 8876   | 6  | 1st exon               | Open sea | -3.245E-01 | 6.273E-11 |
| VSTM1     | cg12315311 | 284415 | 19 | TSS1500                | Open sea | -3.185E-01 | 8.037E-20 |
| VSX1      | cg06151165 | 30813  | 20 | Gene body              | Island   | 3.306E-01  | 3.252E-12 |
| VSX2      | cg11525285 | 338917 | 14 | 1st exon               | Island   | 3.027E-01  | 1.266E-10 |
| WBSCR17   | cg01366419 | 64409  | 7  | TSS1500                | Island   | 3.578E-01  | 2.339E-15 |
| WDR17     | cg18443378 | 116966 | 4  | TSS200                 | Island   | 3.150E-01  | 2.279E-05 |
| WDR8      | cg26128092 | 49856  | 1  | TSS1500                | Island   | 3.451E-01  | 1.125E-16 |
| WDR86     | cg24068372 | 349136 | 7  | TSS200                 | Island   | 3.630E-01  | 4.071E-12 |
| WIPI2     | cg20592700 | 26100  | 7  | 1st exon               | Island   | -3.403E-01 | 8.038E-31 |
| WT1       | cg01693350 | 7490   | 11 | Gene body              | Island   | 3.834E-01  | 4.178E-11 |
| WT1       | cg04096767 | 7490   | 11 | Gene body              | Island   | 3.179E-01  | 6.298E-16 |
| WT1       | cg05222924 | 7490   | 11 | Gene body              | N-Shore  | 3.029E-01  | 3.834E-10 |
| WT1       | cg13641903 | 7490   | 11 | Gene body              | Island   | 3.698E-01  | 3.627E-16 |
| ZBTB48    | cg14186992 | 3104   | 1  | TSS1500                | Island   | 3.016E-01  | 1.147E-18 |
| ZFP28     | cg23850212 | 140612 | 19 | TSS1500                | Island   | 3.448E-01  | 8.146E-15 |
| ZFP42     | cg06274159 | 132625 | 4  | TSS200                 | Island   | 4.198E-01  | 3.118E-15 |
| ZFP82     | cg25886284 | 284406 | 19 | 5'UTR/1st exon         | Island   | 3.836E-01  | 5.016E-12 |
| ZNF135    | cg16638540 | 7694   | 19 | TSS200                 | Island   | 3.642E-01  | 2.151E-15 |
| ZNF148    | cg15705999 | 7707   | 3  | 5'UTR                  | Island   | -3.362E-01 | 5.663E-25 |
| ZNF154    | cg08668790 | 7710   | 19 | TSS200                 | S-Shore  | 3.415E-01  | 1.565E-13 |

|         |            |        |    |                          |          |            |           |
|---------|------------|--------|----|--------------------------|----------|------------|-----------|
| ZNF154  | cg21790626 | 7710   | 19 | 5'UTR/1st exon           | Island   | 4.459E-01  | 2.436E-18 |
| ZNF177  | cg09643544 | 7730   | 19 | 1st exon/5'UTR           | Island   | 3.032E-01  | 3.187E-15 |
| ZNF22   | cg00899659 | 7570   | 10 | TSS1500                  | N-Shore  | -3.141E-01 | 4.402E-12 |
| ZNF385D | cg18267381 | 79750  | 3  | 1st exon/5'UTR           | Open sea | 3.214E-01  | 2.513E-15 |
| ZNF415  | cg10332700 | 55786  | 19 | 5'UTR/1st exon/Gene body | Island   | 4.031E-01  | 2.960E-12 |
| ZNF454  | cg03355526 | 285676 | 5  | 5'UTR                    | Island   | 3.932E-01  | 2.399E-15 |
| ZNF454  | cg23037403 | 285676 | 5  | TSS200                   | Island   | 3.390E-01  | 1.419E-15 |
| ZNF471  | cg14289985 | 57573  | 19 | TSS1500                  | Island   | 3.364E-01  | 4.026E-12 |
| ZNF540  | cg03975694 | 163255 | 19 | 5'UTR/1st exon           | S-Shelf  | 3.172E-01  | 2.718E-13 |
| ZNF542  | cg26309134 | 147947 | 19 | TSS200/Gene body         | Island   | 4.104E-01  | 1.527E-12 |
| ZNF560  | cg04062391 | 147741 | 19 | 5'UTR                    | Island   | 3.250E-01  | 3.343E-14 |
| ZNF577  | cg16731240 | 84765  | 19 | TSS200                   | Island   | 3.057E-01  | 1.237E-09 |
| ZNF619  | cg21942438 | 285267 | 3  | TSS1500                  | N-Shore  | -3.076E-01 | 1.395E-13 |
| ZNF625  | cg17892556 | 90589  | 19 | 1st exon/5'UTR           | Island   | 4.173E-01  | 3.855E-09 |
| ZNF660  | cg22598028 | 285349 | 3  | 5'UTR/1st exon           | Island   | 3.610E-01  | 1.781E-11 |
| ZNF671  | cg19246110 | 79891  | 19 | 1st exon/5'UTR           | Island   | 3.244E-01  | 2.095E-08 |
| ZNF677  | cg16708981 | 342926 | 19 | TSS1500                  | S-Shore  | 3.051E-01  | 2.313E-14 |
| ZNF677  | cg18335068 | 342926 | 19 | 5'UTR                    | Island   | 3.165E-01  | 5.074E-13 |
| ZNF718  | cg15792688 | 255403 | 4  | Gene body                | Island   | -3.274E-01 | 2.287E-17 |
| ZNF781  | cg25875213 | 163115 | 19 | 5'UTR/1st exon           | Island   | 3.698E-01  | 6.159E-12 |
| ZSCAN1  | cg21331821 | 284312 | 19 | TSS1500                  | Island   | 4.085E-01  | 1.214E-15 |
| ZSCAN18 | cg06243556 | 65982  | 19 | Gene body/5'UTR/1st exon | Island   | 3.051E-01  | 7.245E-06 |
| NA      | cg13912117 | NA     | 8  | NA                       | Island   | 5.050E-01  | 6.391E-21 |

(B) Genes showing significant differences of DNA methylation levels between N and C samples in Cluster B1

| Gene symbol  | Probe ID <sup>1</sup> | National Center for<br>Biotechnology Information<br>(NCBI) Gene ID | Chromosome | Gene region <sup>2</sup> | CpG type <sup>3</sup> | $\Delta\beta_{N-C}$ | <i>P</i>  |
|--------------|-----------------------|--------------------------------------------------------------------|------------|--------------------------|-----------------------|---------------------|-----------|
| A1BG         | cg22568540            | 1                                                                  | 19         | 5'UTR/1st exon           | N-Shelf               | 3.470E-01           | 1.781E-24 |
| ABCC12       | cg14074641            | 94160                                                              | 16         | TSS1500                  | Open sea              | -3.377E-01          | 7.371E-10 |
| AOAH         | cg14451276            | 313                                                                | 7          | 1st exon/5'UTR           | Open sea              | -3.174E-01          | 9.905E-11 |
| ATP2B4       | cg22226839            | 493                                                                | 1          | 5'UTR/1st exon           | N-Shelf               | 3.044E-01           | 5.860E-14 |
| BATF         | cg15645309            | 10538                                                              | 14         | TSS200                   | Open sea              | -3.116E-01          | 1.254E-11 |
| BLNK         | cg16779976            | 29760                                                              | 10         | 1st exon                 | Open sea              | -3.497E-01          | 1.555E-12 |
| BPTF         | cg16435601            | 2186                                                               | 17         | 1st exon                 | S-Shore               | -3.683E-01          | 2.586E-19 |
| C14orf162    | cg14912575            | 56936                                                              | 14         | TSS1500                  | Island                | 3.020E-01           | 8.252E-16 |
| CELSR1       | cg06268694            | 9620                                                               | 22         | 1st exon                 | Island                | 3.027E-01           | 1.445E-07 |
| CGB5         | cg24908058            | 93659                                                              | 19         | 5'UTR/1st exon           | Open sea              | 3.298E-01           | 3.616E-20 |
| CPA3         | cg24290574            | 1359                                                               | 3          | 1st exon                 | Open sea              | -3.305E-01          | 1.220E-11 |
| CRMP1        | cg03544320            | 1400                                                               | 4          | 1st exon                 | Island                | 3.489E-01           | 5.130E-05 |
| CSTL1        | cg20171451            | 128817                                                             | 20         | TSS1500                  | Open sea              | 3.535E-01           | 8.234E-30 |
| DUSP2        | cg01148741            | 1844                                                               | 2          | TSS1500                  | Island                | -3.365E-01          | 3.483E-16 |
| EPB41L3      | cg00027083            | 23136                                                              | 18         | 5'UTR                    | Island                | 3.015E-01           | 2.816E-06 |
| EPO          | cg08575537            | 2056                                                               | 7          | Gene body                | Island                | 3.291E-01           | 4.329E-08 |
| FGFR1        | cg08722122            | 2260                                                               | 8          | TSS1500                  | S-Shore               | 3.293E-01           | 1.415E-22 |
| GBGT1        | cg01169778            | 26301                                                              | 9          | 5'UTR                    | Island                | 4.117E-01           | 2.242E-20 |
| GDPD3        | cg13543096            | 79153                                                              | 16         | TSS1500                  | Open sea              | 3.067E-01           | 2.318E-16 |
| GNA15        | cg26482939            | 2769                                                               | 19         | Gene body                | Open sea              | -3.680E-01          | 2.309E-13 |
| HHIPL1       | cg06834875            | 84439                                                              | 14         | TSS1500                  | Island                | -3.348E-01          | 5.451E-14 |
| HOXA9        | cg26521404            | 3205                                                               | 7          | 1st exon                 | Island                | 3.347E-01           | 9.099E-07 |
| IGSF21       | cg23349790            | 84966                                                              | 1          | 5'UTR/1st exon           | Island                | 3.806E-01           | 8.450E-07 |
| LOC100271831 | cg13543096            | NA                                                                 | 16         | TSS200                   | Open sea              | 3.067E-01           | 2.318E-16 |
| LRTOMT       | cg23256971            | 220074                                                             | 11         | 5'UTR/Gene body/TSS1500  | S-Shore               | 3.616E-01           | 4.100E-33 |
| MGMT         | cg07638938            | 4255                                                               | 10         | Gene body                | Open sea              | 4.308E-01           | 1.795E-35 |
| MMRN1        | cg21092324            | 22915                                                              | 4          | 1st exon                 | Open sea              | -3.433E-01          | 5.968E-12 |
| MN1          | cg27269921            | 4330                                                               | 22         | 5'UTR/1st exon           | Island                | 3.169E-01           | 2.072E-06 |
| MYCBP        | cg12792157            | 26292                                                              | 1          | 5'UTR/1st exon           | Island                | -4.247E-01          | 3.123E-24 |
| NCRNA00181   | cg22568540            | 503538                                                             | 19         | Gene body                | N-Shelf               | 3.470E-01           | 1.781E-24 |
| NUDT15       | cg11473104            | 55270                                                              | 13         | TSS200                   | N-Shore               | 3.440E-01           | 2.643E-18 |
| OBP2B        | cg15538820            | 29989                                                              | 9          | TSS200                   | Open sea              | 3.465E-01           | 1.103E-25 |
| PCSK6        | cg20249919            | 5046                                                               | 15         | 1st exon                 | Island                | 4.452E-01           | 7.871E-07 |
| PKDREJ       | cg11377136            | 10343                                                              | 22         | 1st exon                 | Island                | 3.240E-01           | 2.553E-08 |
| PKP2         | cg03302287            | 5318                                                               | 12         | 1st exon                 | Island                | -3.132E-01          | 3.814E-13 |
| PLEKHF1      | cg05512099            | 79156                                                              | 19         | TSS1500                  | N-Shore               | -3.304E-01          | 1.356E-12 |
| PSME2        | cg05874478            | 5721                                                               | 14         | 1st exon                 | N-Shore               | -3.150E-01          | 9.556E-19 |
| PXDN         | cg12164282            | 7837                                                               | 2          | 1st exon                 | Island                | 3.089E-01           | 3.458E-07 |
| RNF31        | cg05874478            | 55072                                                              | 14         | TSS1500                  | N-Shore               | -3.150E-01          | 9.556E-19 |
| RPL36        | cg25136310            | 25873                                                              | 19         | 1st exon/Gene body       | Island                | -3.178E-01          | 2.668E-35 |
| SLC22A18     | cg03336167            | 5002                                                               | 11         | Gene body                | Island                | 4.285E-01           | 5.987E-12 |
| TUBB8        | cg26675077            | 347688                                                             | 10         | TSS1500/1st exon/5'UTR   | S-Shore               | 3.160E-01           | 7.479E-22 |
| WIPI2        | cg20592700            | 26100                                                              | 7          | 1st exon                 | Island                | -3.353E-01          | 4.326E-24 |
| ZNF148       | cg15705999            | 7707                                                               | 3          | 5'UTR                    | Island                | -3.420E-01          | 1.067E-24 |
| ZNF718       | cg15792688            | 255403                                                             | 4          | Gene body                | Island                | -3.642E-01          | 7.872E-29 |

(C) Genes showing significant differences of DNA methylation levels between N and C samples in Cluster B2

| Gene symbol | Probe ID <sup>1</sup> | National Center for<br>Biotechnology Information<br>(NCBI) Gene ID | Chromosome | Gene region <sup>2</sup> | CpG type <sup>3</sup> | $\Delta\beta_{N-C}$ | <i>P</i>  |
|-------------|-----------------------|--------------------------------------------------------------------|------------|--------------------------|-----------------------|---------------------|-----------|
| A1BG        | cg22568540            | 1                                                                  | 19         | 5'UTR/1st exon           | N-Shelf               | 3.531E-01           | 1.366E-19 |
| ANAT        | cg09382492            | 15                                                                 | 17         | Gene body/1st exon/5'UTR | Open sea              | 3.103E-01           | 3.961E-29 |
| ABCC12      | cg14074641            | 94160                                                              | 16         | TSS1500                  | Open sea              | -3.420E-01          | 4.609E-46 |
| ABCC3       | cg00081975            | 8714                                                               | 17         | Gene body                | Island                | 3.354E-01           | 9.603E-16 |

|           |            |        |    |                |          |            |           |
|-----------|------------|--------|----|----------------|----------|------------|-----------|
| ACADL     | cg14795968 | 33     | 2  | Gene body      | Island   | 3.103E-01  | 1.726E-11 |
| ACTL6B    | cg08572611 | 51412  | 7  | Gene body      | Island   | 3.164E-01  | 3.884E-08 |
| ADAMTS15  | cg02564733 | 170689 | 11 | 1st exon       | Island   | 3.144E-01  | 1.595E-29 |
| ADAMTS18  | cg03238797 | 170692 | 16 | 1st exon/5'UTR | Island   | 3.188E-01  | 1.161E-12 |
| ADCY5     | cg13878010 | 111    | 3  | 1st exon       | Island   | 3.039E-01  | 5.189E-11 |
| ADHFE1    | cg01988129 | 137872 | 8  | Gene body      | Island   | 4.350E-01  | 2.452E-12 |
| ADRA1D    | cg11934695 | 146    | 20 | TSS1500        | Island   | 3.349E-01  | 5.848E-16 |
| ADRB3     | cg17619823 | 155    | 8  | 1st exon       | Island   | 3.207E-01  | 1.392E-13 |
| AFF3      | cg06183267 | 3899   | 2  | TSS200         | Open sea | -3.001E-01 | 3.053E-10 |
| AIM2      | cg10636246 | 9447   | 1  | TSS1500        | Open sea | -3.582E-01 | 4.047E-15 |
| AJAP1     | cg17525406 | 55966  | 1  | Gene body      | Island   | 3.730E-01  | 7.845E-15 |
| AKAP12    | cg01555431 | 9590   | 6  | Gene body      | Island   | 3.215E-01  | 2.297E-23 |
| AKR1C1    | cg07639198 | 1645   | 10 | TSS1500        | Open sea | -3.082E-01 | 5.875E-04 |
| ALDH1A3   | cg19177941 | 220    | 15 | 1st exon       | Island   | 3.602E-01  | 2.842E-19 |
| ALG12     | cg15316289 | 79087  | 22 | 5'UTR          | N-Shore  | 3.214E-01  | 2.066E-19 |
| AMPH      | cg10293925 | 273    | 7  | 5'UTR/1st exon | Island   | 3.843E-01  | 2.176E-10 |
| AOAH      | cg14451276 | 313    | 7  | 1st exon/5'UTR | Open sea | -3.953E-01 | 6.165E-12 |
| ARHGAP15  | cg27365426 | 55843  | 2  | TSS1500        | Open sea | -3.075E-01 | 2.836E-13 |
| ARHGAP25  | cg09721047 | 9938   | 2  | 5'UTR/1st exon | Open sea | -3.232E-01 | 2.750E-12 |
| ARHGAP25  | cg15258980 | 9938   | 2  | TSS1500        | Open sea | -3.014E-01 | 2.857E-12 |
| ARNT2     | cg17788682 | 9915   | 15 | Gene body      | Island   | 3.034E-01  | 1.986E-22 |
| ARRDC4    | cg05595345 | 91947  | 15 | 1st exon       | Island   | 3.695E-01  | 2.685E-12 |
| ATP2B4    | cg22226839 | 493    | 1  | 5'UTR/1st exon | N-Shelf  | 3.073E-01  | 1.142E-50 |
| ATP6V0A1  | cg00706536 | 535    | 17 | TSS1500        | N-Shore  | -3.015E-01 | 5.103E-35 |
| ATRNL1    | cg04335339 | 26033  | 10 | TSS200         | Island   | 3.716E-01  | 1.116E-30 |
| BAALC     | cg10918202 | 79870  | 8  | 1st exon       | Island   | 3.104E-01  | 6.360E-46 |
| BACE1     | cg15427448 | 23621  | 11 | 1st exon/5'UTR | Island   | 4.145E-01  | 4.154E-17 |
| BATF      | cg15645309 | 10538  | 14 | TSS200         | Open sea | -3.460E-01 | 4.938E-11 |
| BCL11B    | cg02452985 | 64919  | 14 | 1st exon       | Island   | 3.690E-01  | 1.326E-26 |
| BLNK      | cg16779976 | 29760  | 10 | 1st exon       | Open sea | -3.570E-01 | 4.998E-11 |
| BMPR1B    | cg09156233 | 658    | 4  | 5'UTR          | Island   | 4.232E-01  | 7.593E-13 |
| BPTF      | cg16435601 | 2186   | 17 | 1st exon       | S-Shore  | -3.699E-01 | 1.513E-17 |
| BRSK2     | cg01468621 | 9024   | 11 | Gene body      | Island   | 3.575E-01  | 1.458E-16 |
| BTBD3     | cg14603345 | 22903  | 20 | TSS200         | Island   | 3.948E-01  | 1.548E-11 |
| BTG4      | cg22879515 | 54766  | 11 | TSS1500        | Island   | 3.037E-01  | 1.073E-26 |
| BTG4      | cg23211240 | 54766  | 11 | TSS1500        | Island   | 3.320E-01  | 1.459E-11 |
| BZRAP1    | cg12937434 | 9256   | 17 | 1st exon/5'UTR | S-Shelf  | -3.263E-01 | 3.132E-11 |
| C10orf35  | cg22368262 | 219738 | 10 | 5'UTR          | Island   | 4.255E-01  | 2.456E-14 |
| C11orf21  | cg00041575 | 29125  | 11 | Gene body      | Open sea | -3.491E-01 | 2.475E-15 |
| C14orf162 | cg14912575 | 56936  | 14 | TSS1500        | Island   | 3.276E-01  | 3.406E-19 |
| C18orf1   | cg18106189 | 753    | 18 | TSS200         | Island   | 3.253E-01  | 2.126E-28 |
| C1orf229  | cg23695504 | 388759 | 1  | 1st exon       | Island   | 3.837E-01  | 7.364E-09 |
| C6orf155  | cg25141674 | 79940  | 6  | TSS1500        | Island   | 3.109E-01  | 6.703E-22 |
| C8orf56   | cg10918202 | 157556 | 8  | Gene body      | Island   | 3.104E-01  | 6.360E-46 |
| C9orf25   | cg23579062 | 203259 | 9  | Gene body      | Island   | 3.429E-01  | 1.092E-15 |
| CACNA1G   | cg18454685 | 8913   | 17 | Gene body      | Island   | 3.890E-01  | 8.438E-29 |
| CACNB2    | cg01805540 | 783    | 10 | 1st exon/5'UTR | Island   | 3.709E-01  | 8.062E-10 |
| CASP2     | cg09243021 | 835    | 7  | TSS1500        | N-Shore  | 3.570E-01  | 5.757E-23 |
| CASP8     | cg26799474 | 841    | 2  | 5'UTR          | Open sea | -3.220E-01 | 7.152E-15 |
| CD101     | cg23953831 | 9398   | 1  | 5'UTR/1st exon | Open sea | -3.314E-01 | 6.122E-12 |
| CD160     | cg12832565 | 11126  | 1  | TSS200         | S-Shore  | -3.179E-01 | 2.013E-16 |
| CD164L2   | cg05436231 | 388611 | 1  | 1st exon/5'UTR | Island   | 3.208E-01  | 1.926E-09 |
| CD209     | cg07608333 | 30835  | 19 | TSS1500        | Open sea | -3.106E-01 | 1.793E-27 |
| CD37      | cg10037005 | 951    | 19 | TSS200         | N-Shelf  | -3.803E-01 | 1.192E-20 |
| CD37      | cg15046675 | 951    | 19 | 1st exon/5'UTR | N-Shelf  | -3.043E-01 | 3.916E-12 |
| CD53      | cg22325572 | 963    | 1  | 5'UTR          | Open sea | -3.572E-01 | 1.294E-14 |
| CD84      | cg16776350 | 8832   | 1  | Gene body      | Open sea | -3.292E-01 | 1.748E-13 |
| CD96      | cg25298754 | 10225  | 3  | Gene body      | Open sea | -3.040E-01 | 4.153E-14 |
| CDH1      | cg20716119 | 999    | 16 | Gene body      | Island   | 3.225E-01  | 8.195E-13 |
| CDH1      | cg23989635 | 999    | 16 | 5'UTR/1st exon | Island   | 3.126E-01  | 4.018E-23 |
| CDH11     | cg10065825 | 1009   | 16 | TSS1500        | Island   | 3.146E-01  | 3.186E-12 |
| CDH11     | cg12163490 | 1009   | 16 | 5'UTR/1st exon | Island   | 3.009E-01  | 3.133E-12 |
| CDKN1C    | cg23146358 | 1028   | 11 | Gene body      | Island   | 3.690E-01  | 1.956E-28 |
| CEBPA     | cg07422345 | 1050   | 19 | TSS1500        | Island   | 3.084E-01  | 3.792E-30 |
| CELSR1    | cg06268694 | 9620   | 22 | 1st exon       | Island   | 4.284E-01  | 1.278E-10 |
| CGB5      | cg24908058 | 93659  | 19 | 5'UTR/1st exon | Open sea | 3.407E-01  | 1.218E-16 |
| CHAT      | cg11389172 | 1103   | 10 | 5'UTR          | Island   | 3.200E-01  | 3.153E-08 |
| CHD5      | cg08080029 | 26038  | 1  | Gene body      | Island   | 4.839E-01  | 1.600E-24 |
| CHP2      | cg15309006 | 63928  | 16 | 1st exon/5'UTR | Island   | 3.488E-01  | 3.447E-10 |
| CHRNA3    | cg04603031 | 1136   | 15 | 5'UTR/1st exon | Island   | 3.164E-01  | 7.375E-10 |
| CHRNA6    | cg07906724 | 8973   | 8  | TSS1500        | Open sea | -3.320E-01 | 1.091E-12 |
| CLEC11A   | cg20308817 | 6320   | 19 | TSS1500        | N-Shore  | 3.007E-01  | 5.351E-17 |
| CLEC2D    | cg12810837 | 29121  | 12 | TSS200         | Open sea | -3.603E-01 | 7.363E-22 |
| CNIH3     | cg00290506 | 149111 | 1  | 1st exon/5'UTR | Island   | 3.068E-01  | 6.676E-13 |
| CNN3      | cg26619317 | 1266   | 1  | Gene body      | Island   | 3.695E-01  | 7.724E-17 |
| COL18A1   | cg15470298 | 80781  | 21 | Gene body      | Island   | 3.484E-01  | 2.795E-41 |
| CPA3      | cg24290574 | 1359   | 3  | 1st exon       | Open sea | -4.210E-01 | 3.065E-18 |
| CPZ       | cg00514895 | 8532   | 4  | TSS200         | Island   | 3.023E-01  | 2.377E-24 |
| CPZ       | cg03292388 | 8532   | 4  | 5'UTR/1st exon | Island   | 3.620E-01  | 6.633E-14 |
| CRELD2    | cg15316289 | 79174  | 22 | TSS1500        | N-Shore  | 3.214E-01  | 2.066E-19 |
| CRLF1     | cg10810921 | 9244   | 19 | 1st exon/5'UTR | Island   | 3.036E-01  | 1.125E-35 |
| CRMP1     | cg03544320 | 1400   | 4  | 1st exon       | Island   | 4.152E-01  | 7.652E-06 |

|         |            |        |    |                        |          |            |           |
|---------|------------|--------|----|------------------------|----------|------------|-----------|
| CRYBA4  | cg15559737 | 1413   | 22 | TSS1500                | Open sea | 3.057E-01  | 3.945E-16 |
| CSMD1   | cg22619018 | 64478  | 8  | TSS1500                | Island   | 4.122E-01  | 1.412E-19 |
| CST7    | cg11804789 | 8530   | 20 | TSS200                 | Open sea | -3.722E-01 | 3.816E-15 |
| CSTL1   | cg20171451 | 128817 | 20 | TSS1500                | Open sea | 3.524E-01  | 1.130E-27 |
| CTDSP1  | cg11171719 | 10217  | 3  | 1st exon/5'UTR         | Island   | 3.243E-01  | 5.237E-12 |
| CTGF    | cg24311382 | 1490   | 6  | 1st exon/5'UTR         | Island   | 3.319E-01  | 5.231E-24 |
| CUX2    | cg09229912 | 23316  | 12 | 1st exon/5'UTR         | Island   | 4.030E-01  | 6.385E-15 |
| CXCR1   | cg13519373 | 3577   | 2  | 5'UTR                  | Open sea | -3.212E-01 | 9.114E-15 |
| CYP26B1 | cg04884908 | 56603  | 2  | 1st exon               | Island   | 3.254E-01  | 1.759E-15 |
| CYP4F11 | cg24655310 | 57834  | 19 | 1st exon/Gene body     | Open sea | 3.185E-01  | 1.786E-12 |
| CYP4F22 | cg14851685 | 126410 | 19 | TSS1500                | N-Shore  | 3.391E-01  | 1.385E-24 |
| CYR61   | cg04453065 | 3491   | 1  | 1st exon/5'UTR         | Island   | 3.572E-01  | 3.136E-13 |
| DAPK1   | cg08797471 | 1612   | 9  | 5'UTR                  | Island   | 4.360E-01  | 3.078E-15 |
| DAPP1   | cg21614638 | 27071  | 4  | TSS200                 | Open sea | -3.082E-01 | 2.412E-08 |
| DES     | cg18182399 | 1674   | 2  | 1st exon/5'UTR         | N-Shore  | 3.199E-01  | 1.997E-08 |
| DLX5    | cg13344740 | 1749   | 7  | 5'UTR/1st exon         | Island   | 3.300E-01  | 1.752E-15 |
| DMBX1   | cg09914444 | 127343 | 1  | TSS1500                | Open sea | -3.705E-01 | 1.659E-15 |
| DMRT3   | cg12420104 | 58524  | 9  | 1st exon               | Island   | 3.124E-01  | 1.978E-16 |
| DNAI1   | cg23579062 | 27019  | 9  | TSS1500                | Island   | 3.429E-01  | 1.092E-15 |
| DPYS    | cg10303487 | 1807   | 8  | 1st exon               | Island   | 3.937E-01  | 6.042E-11 |
| DPYSL5  | cg26195812 | 56896  | 2  | 5'UTR                  | Island   | 3.273E-01  | 2.909E-16 |
| DRD4    | cg06825142 | 1815   | 11 | TSS200                 | Island   | 3.056E-01  | 3.982E-22 |
| DSCR10  | cg17233935 | 259234 | 21 | TSS1500                | Open sea | -3.044E-01 | 2.069E-37 |
| DSG4    | cg13445249 | 147409 | 18 | Gene body              | Open sea | -3.088E-01 | 1.088E-19 |
| DUSP2   | cg01148741 | 1844   | 2  | TSS1500                | Island   | -3.875E-01 | 9.330E-16 |
| ECEL1   | cg25431974 | 9427   | 2  | TSS1500                | Island   | 3.252E-01  | 9.364E-34 |
| EDN3    | cg04048259 | 1908   | 20 | TSS200                 | Island   | 3.129E-01  | 2.053E-08 |
| EDNRB   | cg23316360 | 1910   | 13 | 5'UTR/1st exon         | Island   | 3.117E-01  | 9.153E-16 |
| EGFR    | cg14094960 | 1956   | 7  | 5'UTR/1st exon         | Island   | 4.072E-01  | 2.373E-13 |
| EIF4E3  | cg13562542 | 317649 | 3  | 5'UTR                  | Island   | 4.502E-01  | 7.449E-11 |
| ENO2    | cg13334990 | 2026   | 12 | 1st exon/5'UTR         | Island   | 3.281E-01  | 8.222E-38 |
| EPB41L3 | cg00027083 | 23136  | 18 | 5'UTR                  | Island   | 3.777E-01  | 9.058E-08 |
| EPO     | cg08575537 | 2056   | 7  | Gene body              | Island   | 4.591E-01  | 1.986E-10 |
| ERBB2   | cg11993754 | 2064   | 17 | 5'UTR/1st exon         | Island   | 3.242E-01  | 9.105E-11 |
| ERBB2   | cg26111030 | 2064   | 17 | 5'UTR/1st exon         | N-Shore  | 3.899E-01  | 4.715E-25 |
| ERBB4   | cg20637307 | 2066   | 2  | TSS1500                | S-Shore  | 3.585E-01  | 2.044E-37 |
| ERC2    | cg04759439 | 26059  | 3  | TSS1500                | Island   | 3.984E-01  | 3.016E-15 |
| ERP29   | cg26789453 | 10961  | 12 | Gene body              | S-Shore  | -3.308E-01 | 1.204E-12 |
| EVI2A   | cg23352695 | 2123   | 17 | TSS200                 | Open sea | -3.571E-01 | 1.814E-14 |
| EVL     | cg18621299 | 51466  | 14 | TSS200                 | Open sea | -3.322E-01 | 8.217E-12 |
| FAM150A | cg17162024 | 389658 | 8  | TSS1500                | Island   | 3.466E-01  | 2.574E-11 |
| FAM20A  | cg01697732 | 54757  | 17 | TSS1500                | Island   | 4.575E-01  | 4.159E-45 |
| FAM20A  | cg13591701 | 54757  | 17 | 5'UTR/1st exon         | Island   | 3.658E-01  | 1.027E-22 |
| FAM3B   | cg03158400 | 54097  | 21 | Gene body              | Island   | 3.137E-01  | 6.826E-28 |
| FAM78A  | cg17936488 | 286336 | 9  | 1st exon               | N-Shore  | -3.021E-01 | 3.040E-10 |
| FAT1    | cg03098643 | 2195   | 4  | 5'UTR                  | Island   | 3.766E-01  | 2.127E-14 |
| FBLIM1  | cg23002761 | 54751  | 1  | 5'UTR                  | Island   | 3.082E-01  | 1.452E-12 |
| FBN2    | cg25084878 | 2201   | 5  | 1st exon/5'UTR         | Island   | 3.708E-01  | 2.532E-16 |
| FBXO2   | cg01420388 | 26232  | 1  | Gene body              | Island   | 3.004E-01  | 3.760E-21 |
| FBXO39  | cg20723355 | 162517 | 17 | 5'UTR                  | Island   | 3.457E-01  | 7.214E-11 |
| FBXO44  | cg01420388 | 93611  | 1  | TSS1500/TSS200         | Island   | 3.004E-01  | 3.760E-21 |
| FGF3    | cg15337897 | 2248   | 11 | TSS1500                | Island   | 3.284E-01  | 1.177E-12 |
| FGF8    | cg16584573 | 2253   | 10 | 1st exon               | Island   | 3.259E-01  | 1.232E-14 |
| FGFR1   | cg08722122 | 2260   | 8  | TSS1500                | S-Shore  | 3.465E-01  | 5.845E-17 |
| FGFR2   | cg17028039 | 2263   | 10 | 5'UTR/1st exon         | Island   | 3.308E-01  | 3.457E-17 |
| FLRT2   | cg17410236 | 23768  | 14 | 1st exon/5'UTR         | Island   | 3.361E-01  | 3.247E-20 |
| FLT4    | cg00489401 | 2324   | 5  | Gene body/Gene body    | Island   | 3.012E-01  | 4.390E-08 |
| FOXD3   | cg22815110 | 27022  | 1  | 1st exon               | Island   | 3.472E-01  | 3.640E-13 |
| FOXE3   | cg18815943 | 2301   | 1  | 1st exon               | Island   | 3.588E-01  | 7.979E-16 |
| GABBR2  | cg02058918 | 9568   | 9  | 1st exon               | Island   | 3.490E-01  | 5.187E-21 |
| GALR1   | cg04534765 | 2587   | 18 | 1st exon/5'UTR         | Island   | 3.508E-01  | 5.423E-07 |
| GALR1   | cg26721264 | 2587   | 18 | TSS1500                | Island   | 3.180E-01  | 2.445E-12 |
| GATA5   | cg15749748 | 140628 | 20 | Gene body              | Island   | 3.136E-01  | 9.395E-15 |
| GBGT1   | cg01169778 | 26301  | 9  | 5'UTR                  | Island   | 4.378E-01  | 1.347E-28 |
| GBX2    | cg06954481 | 2637   | 2  | 1st exon               | Island   | 4.109E-01  | 1.024E-11 |
| GCET2   | cg27043141 | 257144 | 3  | 5'UTR/Gene body        | Open sea | -3.477E-01 | 1.174E-30 |
| GDNF    | cg07442479 | 2668   | 5  | 1st exon/5'UTR         | Island   | 3.236E-01  | 1.326E-11 |
| GDPD3   | cg13543096 | 79153  | 16 | TSS1500                | Open sea | 3.429E-01  | 1.296E-14 |
| GFPT2   | cg21937886 | 9945   | 5  | Gene body              | Island   | 3.654E-01  | 4.015E-22 |
| GLB1L3  | cg19674669 | 112937 | 11 | Gene body              | Island   | 3.445E-01  | 2.488E-18 |
| GLRB    | cg09688546 | 2743   | 4  | 1st exon/TSS200/5'UTR  | Island   | 3.141E-01  | 1.315E-09 |
| GNA15   | cg26482939 | 2769   | 19 | Gene body              | Open sea | -3.757E-01 | 5.555E-19 |
| GNG4    | cg09649610 | 2786   | 1  | TSS1500/1st exon/5'UTR | Island   | 3.165E-01  | 9.518E-19 |
| GNMT    | cg14338887 | 27232  | 6  | 1st exon/5'UTR         | Island   | 4.416E-01  | 9.532E-12 |
| GNMT    | cg24101359 | 27232  | 6  | TSS200                 | Island   | 3.745E-01  | 2.447E-16 |
| GPATCH2 | cg01727899 | 55105  | 1  | TSS1500                | S-Shore  | -3.053E-01 | 1.961E-43 |
| GPR26   | cg02757432 | 2849   | 10 | 1st exon               | Island   | 3.052E-01  | 1.313E-12 |
| GPR27   | cg13562542 | 2850   | 3  | 1st exon               | Island   | 4.502E-01  | 7.449E-11 |
| GPR55   | cg20287234 | 9290   | 2  | 5'UTR                  | Open sea | -3.163E-01 | 3.127E-22 |
| GPR65   | cg15625636 | 8477   | 14 | 5'UTR                  | Open sea | -3.352E-01 | 2.212E-17 |
| GPRC5C  | cg07789083 | 55890  | 17 | TSS200                 | Island   | 3.295E-01  | 6.668E-17 |
| GPRC5C  | cg23953396 | 55890  | 17 | 1st exon/5'UTR         | Island   | 3.010E-01  | 1.332E-19 |

|              |            |        |    |                          |          |            |           |
|--------------|------------|--------|----|--------------------------|----------|------------|-----------|
| GRAP2        | cg03840259 | 9402   | 22 | TSS200                   | Open sea | -3.028E-01 | 8.746E-11 |
| GRB10        | cg06386517 | 2887   | 7  | 5'UTR                    | N-Shore  | 3.630E-01  | 1.700E-27 |
| GRB10        | cg06790324 | 2887   | 7  | 5'UTR                    | N-Shore  | 3.654E-01  | 6.838E-16 |
| GRB10        | cg20651681 | 2887   | 7  | TSS1500                  | Island   | 3.216E-01  | 1.441E-39 |
| GRB10        | cg24302095 | 2887   | 7  | 5'UTR/1st exon           | N-Shore  | 3.381E-01  | 1.397E-15 |
| GREB1        | cg10849854 | 9687   | 2  | 5'UTR                    | Open sea | -3.088E-01 | 6.745E-17 |
| GSC2         | cg26599006 | 2928   | 22 | Gene body                | Island   | 3.708E-01  | 4.572E-16 |
| GSTM3        | cg23472215 | 2947   | 1  | Gene body                | Island   | 3.271E-01  | 4.965E-13 |
| GSX1         | cg26609631 | 219409 | 13 | 5'UTR/1st exon           | Island   | 3.527E-01  | 6.984E-06 |
| HCN4         | cg24396745 | 10021  | 15 | 1st exon/5'UTR           | Island   | 3.440E-01  | 2.115E-17 |
| HES4         | cg02397514 | 57801  | 1  | 1st exon/Gene body       | Island   | 3.380E-01  | 4.636E-34 |
| HHIP         | cg14580567 | 64399  | 4  | 1st exon/5'UTR           | Island   | 3.126E-01  | 4.551E-12 |
| HLA-DOB      | cg04576021 | 3112   | 6  | Gene body                | Open sea | -3.394E-01 | 3.829E-22 |
| HOXA9        | cg26521404 | 3205   | 7  | 1st exon                 | Island   | 4.038E-01  | 1.638E-08 |
| HOXC11       | cg22709192 | 3227   | 12 | 5'UTR/1st exon           | Island   | 3.001E-01  | 1.716E-25 |
| HOXD1        | cg19001226 | 3231   | 2  | 1st exon/5'UTR           | Island   | 3.598E-01  | 1.260E-10 |
| HS3ST1       | cg18059088 | 9957   | 4  | 1st exon/5'UTR           | Island   | 3.026E-01  | 6.615E-22 |
| HS3ST3A1     | cg07480567 | 9955   | 17 | 1st exon/5'UTR           | Island   | 3.038E-01  | 1.834E-11 |
| HTRA1        | cg25920792 | 5654   | 10 | TSS1500                  | Island   | 3.324E-01  | 9.172E-39 |
| IGF1R        | cg22375192 | 3480   | 15 | Gene body                | Island   | 4.237E-01  | 1.701E-13 |
| IGF2         | cg13791131 | 3481   | 11 | 5'UTR                    | Island   | 3.339E-01  | 2.766E-11 |
| IGF2         | cg25574024 | 3481   | 11 | 5'UTR                    | Island   | 3.645E-01  | 1.019E-11 |
| IGF2AS       | cg13791131 | 51214  | 11 | Gene body                | Island   | 3.339E-01  | 2.766E-11 |
| IGF2AS       | cg25574024 | 51214  | 11 | Gene body                | Island   | 3.645E-01  | 1.019E-11 |
| IGFBP2       | cg26187237 | 3485   | 2  | 1st exon                 | Island   | 3.003E-01  | 1.700E-14 |
| IGFBP3       | cg06713098 | 3486   | 7  | 1st exon                 | Island   | 3.974E-01  | 4.484E-11 |
| IGFBP3       | cg15898840 | 3486   | 7  | 1st exon/5'UTR           | Island   | 4.869E-01  | 7.656E-12 |
| IGFBP7       | cg03876618 | 3490   | 4  | Gene body                | Island   | 3.005E-01  | 6.046E-18 |
| IGSF21       | cg23349790 | 84966  | 1  | 5'UTR/1st exon           | Island   | 5.105E-01  | 3.631E-09 |
| IHH          | cg17178336 | 3549   | 2  | TSS200                   | Island   | 3.198E-01  | 3.162E-14 |
| IHH          | cg25908985 | 3549   | 2  | 1st exon                 | Island   | 3.420E-01  | 3.616E-29 |
| IL1B         | cg07935264 | 3553   | 2  | TSS200                   | Open sea | -3.556E-01 | 1.339E-14 |
| IL9          | cg24585690 | 3578   | 5  | 1st exon/5'UTR           | Open sea | -3.331E-01 | 3.667E-21 |
| INHA         | cg06552037 | 3623   | 2  | TSS1500                  | Island   | 3.409E-01  | 3.842E-20 |
| INS-IGF2     | cg02166532 | 723961 | 11 | Gene body/5'UTR/1st exon | Island   | 3.621E-01  | 1.679E-14 |
| INS-IGF2     | cg13791131 | 723961 | 11 | Gene body                | Island   | 3.339E-01  | 2.766E-11 |
| INS-IGF2     | cg25574024 | 723961 | 11 | Gene body                | Island   | 3.645E-01  | 1.019E-11 |
| IPO5         | cg01679262 | 3843   | 13 | 5'UTR                    | Open sea | -3.142E-01 | 2.495E-18 |
| IRS2         | cg14341579 | 8660   | 13 | 5'UTR/1st exon           | Island   | 3.690E-01  | 2.199E-23 |
| IRS2         | cg25802424 | 8660   | 13 | TSS200                   | Island   | 3.474E-01  | 6.893E-19 |
| IRX3         | cg24662961 | 79191  | 16 | TSS1500                  | Island   | 3.693E-01  | 1.318E-12 |
| IRX4         | cg03963198 | 50805  | 5  | 5'UTR/1st exon           | Island   | 4.074E-01  | 2.215E-12 |
| IVL          | cg25082710 | 3713   | 1  | TSS1500                  | Open sea | -3.002E-01 | 1.017E-13 |
| KANK4        | cg07558455 | 163782 | 1  | 5'UTR                    | Island   | 3.297E-01  | 1.186E-10 |
| KCND3        | cg22957381 | 3752   | 1  | TSS1500                  | Island   | 3.325E-01  | 2.259E-37 |
| KCNH2        | cg19781133 | 3757   | 7  | 1st exon                 | Island   | 4.605E-01  | 5.237E-29 |
| KCNK1        | cg14249872 | 3775   | 1  | TSS200                   | Island   | 3.397E-01  | 1.090E-19 |
| KCNK5        | cg02128567 | 8645   | 6  | 1st exon/5'UTR           | Island   | 3.179E-01  | 5.317E-14 |
| KCNK9        | cg01717150 | 51305  | 8  | TSS1500                  | Island   | 3.115E-01  | 4.263E-44 |
| KCNQ1DN      | cg01530101 | 55539  | 11 | TSS200                   | Island   | 3.075E-01  | 2.817E-07 |
| KIF17        | cg15613048 | 57576  | 1  | 1st exon                 | Island   | 3.705E-01  | 1.213E-17 |
| KIF1A        | cg14662379 | 547    | 2  | 5'UTR                    | Island   | 3.600E-01  | 2.356E-18 |
| KITLG        | cg25741452 | 4254   | 12 | 5'UTR/1st exon           | Island   | 3.089E-01  | 1.733E-10 |
| KLF4         | cg07309102 | 9314   | 9  | 1st exon/5'UTR           | Island   | 3.855E-01  | 3.155E-16 |
| KMO          | cg18087514 | 8564   | 1  | Gene body                | Open sea | -3.107E-01 | 3.720E-08 |
| L3MBTL4      | cg14155416 | 91133  | 18 | 5'UTR                    | Island   | 3.357E-01  | 8.607E-15 |
| L3MBTL4      | cg17688525 | 91133  | 18 | TSS200                   | S-Shore  | 4.202E-01  | 6.711E-11 |
| LAMA1        | cg07846220 | 284217 | 18 | 1st exon                 | Island   | 4.016E-01  | 2.869E-09 |
| LARP6        | cg08592761 | 55323  | 15 | Gene body                | Island   | 3.040E-01  | 1.473E-17 |
| LCP1         | cg17771150 | 3936   | 13 | 5'UTR                    | Open sea | -3.264E-01 | 2.153E-11 |
| LCP2         | cg17127769 | 3937   | 5  | 1st exon                 | Open sea | -3.362E-01 | 1.568E-11 |
| LGI2         | cg13359415 | 55203  | 4  | TSS200                   | S-Shore  | 3.142E-01  | 1.381E-10 |
| LHX1         | cg22660578 | 3975   | 17 | TSS1500                  | Island   | 3.399E-01  | 1.093E-09 |
| LMX1B        | cg18453621 | 4010   | 9  | Gene body                | Island   | 3.126E-01  | 1.560E-34 |
| LOC100271831 | cg13543096 | NA     | 16 | TSS200                   | Open sea | 3.429E-01  | 1.296E-14 |
| LOC286002    | cg14646244 | NA     | 7  | Gene body                | N-Shore  | -3.046E-01 | 4.185E-13 |
| LOC80054     | cg07422345 | NA     | 19 | Gene body                | Island   | 3.084E-01  | 3.792E-30 |
| LOXL1        | cg03682712 | 4016   | 15 | 1st exon                 | Island   | 3.157E-01  | 6.818E-14 |
| LRIG3        | cg10708905 | 121227 | 12 | 1st exon/TSS1500         | Island   | 3.199E-01  | 3.695E-12 |
| LRTOMT       | cg23256971 | 220074 | 11 | 5'UTR/Gene body          | S-Shore  | 3.608E-01  | 2.445E-31 |
| LY9          | cg01367992 | 4063   | 1  | Gene body                | Open sea | -3.244E-01 | 3.319E-16 |
| MAFB         | cg02497758 | 9935   | 20 | 1st exon                 | Island   | 3.298E-01  | 2.791E-12 |
| MALL         | cg01615704 | 7851   | 2  | 5'UTR/1st exon           | Island   | 4.421E-01  | 8.692E-15 |
| MAP1B        | cg07380496 | 4131   | 5  | 1st exon                 | Island   | 3.221E-01  | 5.904E-14 |
| MATN3        | cg00261781 | 4148   | 2  | TSS200                   | Island   | 3.233E-01  | 1.207E-23 |
| MED21        | cg01982833 | 9412   | 12 | TSS1500                  | N-Shore  | -3.109E-01 | 1.223E-17 |
| MGMT         | cg07638938 | 4255   | 10 | Gene body                | Open sea | 4.433E-01  | 4.687E-45 |
| MIR34B       | cg22879515 | 407041 | 11 | TSS200                   | Island   | 3.037E-01  | 1.073E-26 |
| MIR34B       | cg23211240 | 407041 | 11 | TSS200                   | Island   | 3.320E-01  | 1.459E-11 |
| MIR34C       | cg22879515 | 407042 | 11 | TSS1500                  | Island   | 3.037E-01  | 1.073E-26 |
| MIR34C       | cg23211240 | 407042 | 11 | TSS1500                  | Island   | 3.320E-01  | 1.459E-11 |
| MMRN1        | cg21092324 | 22915  | 4  | 1st exon                 | Open sea | -4.124E-01 | 1.053E-16 |

|                   |            |        |    |                          |          |            |           |
|-------------------|------------|--------|----|--------------------------|----------|------------|-----------|
| <i>MN1</i>        | cg27269921 | 4330   | 22 | 5'UTR/1st exon           | Island   | 5.033E-01  | 7.830E-18 |
| <i>MSX1</i>       | cg26615830 | 4487   | 4  | TSS200                   | Island   | 3.565E-01  | 8.826E-36 |
| <i>MYCBP</i>      | cg12792157 | 26292  | 1  | 5'UTR/1st exon           | Island   | -4.240E-01 | 3.522E-22 |
| <i>MYO3A</i>      | cg08441170 | 53904  | 10 | 1st exon/5'UTR           | Island   | 3.444E-01  | 6.448E-08 |
| <i>MYO3A</i>      | cg23771603 | 53904  | 10 | 5'UTR                    | Island   | 3.780E-01  | 3.612E-10 |
| <i>NACC2</i>      | cg12004206 | 138151 | 9  | 5'UTR/1st exon           | Island   | 4.219E-01  | 8.043E-43 |
| <i>NAT2</i>       | cg12639234 | 10     | 8  | 5'UTR                    | S-Shelf  | -3.075E-01 | 1.741E-15 |
| <i>NAV1</i>       | cg25167447 | 89796  | 1  | TSS1500                  | Island   | 3.167E-01  | 7.022E-12 |
| <i>NCAPH</i>      | cg01906055 | 23397  | 2  | TSS1500                  | N-Shore  | -3.067E-01 | 2.547E-21 |
| <i>NCKAP1L</i>    | cg16509569 | 3071   | 12 | 1st exon                 | Open sea | -3.264E-01 | 1.215E-16 |
| <i>NCRNA00181</i> | cg22568540 | 503538 | 19 | Gene body                | N-Shelf  | 3.531E-01  | 1.366E-19 |
| <i>NEUROG1</i>    | cg04330449 | 4762   | 5  | 1st exon                 | Island   | 3.647E-01  | 7.552E-09 |
| <i>NF1</i>        | cg23352695 | 4763   | 17 | Gene body                | Open sea | -3.571E-01 | 1.814E-14 |
| <i>NID2</i>       | cg22881914 | 22795  | 14 | TSS1500                  | Island   | 3.008E-01  | 6.960E-10 |
| <i>NKD2</i>       | cg26054540 | 85409  | 5  | Gene body                | Island   | 3.600E-01  | 3.313E-18 |
| <i>NKX6-2</i>     | cg08441806 | 84504  | 10 | 1st exon                 | Island   | 3.326E-01  | 1.445E-08 |
| <i>NLGN2</i>      | cg15660077 | 57555  | 17 | 1st exon                 | N-Shore  | 3.234E-01  | 9.619E-23 |
| <i>NPAS2</i>      | cg07799947 | 4862   | 2  | TSS1500                  | Island   | 3.693E-01  | 2.842E-16 |
| <i>NPAS2</i>      | cg14383135 | 4862   | 2  | 5'UTR                    | Island   | 4.783E-01  | 6.207E-28 |
| <i>NPR2</i>       | cg12876594 | 4882   | 9  | TSS1500                  | Island   | 3.533E-01  | 3.565E-11 |
| <i>NPR2</i>       | cg24194775 | NA     | 9  | TSS1500                  | N-Shore  | 3.819E-01  | 5.608E-10 |
| <i>NR3C1</i>      | cg08818984 | 2908   | 5  | 1st exon/5'UTR           | Open sea | -3.361E-01 | 1.564E-09 |
| <i>NRG1</i>       | cg17457560 | 3084   | 8  | 1st exon/5'UTR/Gene body | Island   | 3.293E-01  | 4.967E-12 |
| <i>NRP1</i>       | cg12870705 | 8829   | 10 | TSS1500                  | Island   | 4.122E-01  | 1.618E-15 |
| <i>NTSR1</i>      | cg03567830 | 4923   | 20 | TSS1500                  | Island   | 3.104E-01  | 6.682E-09 |
| <i>NUDT15</i>     | cg11473104 | 55270  | 13 | TSS200                   | N-Shore  | 3.319E-01  | 5.981E-57 |
| <i>NUMA1</i>      | cg23256971 | 4926   | 11 | TSS1500                  | S-Shore  | 3.608E-01  | 2.445E-31 |
| <i>OBP2B</i>      | cg15538820 | 29989  | 9  | TSS200                   | Open sea | 3.529E-01  | 9.031E-21 |
| <i>OBSL1</i>      | cg06552037 | 23363  | 2  | 1st exon                 | Island   | 3.409E-01  | 3.842E-20 |
| <i>OVOL1</i>      | cg20909686 | 5017   | 11 | TSS1500                  | Island   | 4.640E-01  | 7.461E-59 |
| <i>P2RY6</i>      | cg06637774 | 5031   | 11 | 5'UTR                    | Island   | 3.318E-01  | 9.829E-15 |
| <i>PALM</i>       | cg19912436 | 5064   | 19 | TSS200                   | N-Shore  | 4.951E-01  | 1.028E-15 |
| <i>PARD6G</i>     | cg23922708 | 84552  | 18 | 1st exon                 | Island   | 3.194E-01  | 2.688E-19 |
| <i>PAX7</i>       | cg11428724 | 5081   | 1  | 5'UTR/1st exon           | Island   | 4.426E-01  | 7.151E-15 |
| <i>PCDHA1</i>     | cg12629325 | 56147  | 5  | Gene body                | Island   | 3.458E-01  | 5.378E-16 |
| <i>PCDHA10</i>    | cg12629325 | 56139  | 5  | Gene body                | Island   | 3.458E-01  | 5.378E-16 |
| <i>PCDHA11</i>    | cg12629325 | 56138  | 5  | Gene body                | Island   | 3.458E-01  | 5.378E-16 |
| <i>PCDHA12</i>    | cg12629325 | 56137  | 5  | Gene body                | Island   | 3.458E-01  | 5.378E-16 |
| <i>PCDHA13</i>    | cg12629325 | 56136  | 5  | Gene body                | Island   | 3.458E-01  | 5.378E-16 |
| <i>PCDHA2</i>     | cg12629325 | 56146  | 5  | Gene body                | Island   | 3.458E-01  | 5.378E-16 |
| <i>PCDHA3</i>     | cg12629325 | 56145  | 5  | Gene body                | Island   | 3.458E-01  | 5.378E-16 |
| <i>PCDHA4</i>     | cg12629325 | 56144  | 5  | Gene body                | Island   | 3.458E-01  | 5.378E-16 |
| <i>PCDHA5</i>     | cg12629325 | 56143  | 5  | Gene body                | Island   | 3.458E-01  | 5.378E-16 |
| <i>PCDHA6</i>     | cg12629325 | 56142  | 5  | Gene body                | Island   | 3.458E-01  | 5.378E-16 |
| <i>PCDHA7</i>     | cg12629325 | 56141  | 5  | Gene body                | Island   | 3.458E-01  | 5.378E-16 |
| <i>PCDHA8</i>     | cg12629325 | 56140  | 5  | Gene body                | Island   | 3.458E-01  | 5.378E-16 |
| <i>PCDHA9</i>     | cg12629325 | 9752   | 5  | Gene body                | Island   | 3.458E-01  | 5.378E-16 |
| <i>PCDHAC1</i>    | cg12629325 | 56135  | 5  | 1st exon/5'UTR           | Island   | 3.458E-01  | 5.378E-16 |
| <i>PCSK6</i>      | cg20249919 | 5046   | 15 | 1st exon                 | Island   | 6.168E-01  | 1.551E-12 |
| <i>PDE10A</i>     | cg24133115 | 10846  | 6  | 5'UTR/1st exon           | Island   | 3.477E-01  | 6.280E-10 |
| <i>PDE4C</i>      | cg17861230 | 5143   | 19 | Gene body                | Island   | 3.046E-01  | 4.508E-08 |
| <i>PDGFC</i>      | cg20937139 | 56034  | 4  | TSS1500                  | Island   | 4.155E-01  | 1.117E-13 |
| <i>PDLIM3</i>     | cg10000775 | 27295  | 4  | 1st exon                 | Island   | 3.026E-01  | 1.636E-31 |
| <i>PDX1</i>       | cg17740399 | 3651   | 13 | 5'UTR/1st exon           | Island   | 3.401E-01  | 4.283E-17 |
| <i>PDX1</i>       | cg26344532 | 3651   | 13 | 5'UTR/1st exon           | Island   | 3.196E-01  | 9.231E-17 |
| <i>PHACTR3</i>    | cg20357628 | 116154 | 20 | 5'UTR/1st exon           | Island   | 3.572E-01  | 3.572E-15 |
| <i>PIK3CG</i>     | cg08779777 | 5294   | 7  | TSS200                   | N-Shelf  | -3.465E-01 | 8.490E-13 |
| <i>PKDREJ</i>     | cg11377136 | 10343  | 2  | 1st exon                 | Island   | 4.373E-01  | 1.717E-10 |
| <i>PLA2G7</i>     | cg18630040 | 7941   | 6  | 1st exon/5'UTR           | Island   | 3.444E-01  | 5.763E-34 |
| <i>PLEKHF1</i>    | cg05512099 | 79156  | 19 | TSS1500                  | N-Shore  | -4.151E-01 | 1.567E-24 |
| <i>PLEKHG6</i>    | cg25268678 | 55200  | 12 | 5'UTR/TSS200             | Island   | 3.509E-01  | 1.895E-27 |
| <i>PNPLA3</i>     | cg13184872 | 80339  | 22 | 1st exon/5'UTR           | Island   | 3.093E-01  | 6.412E-17 |
| <i>PPIL6</i>      | cg23978557 | 285755 | 6  | Gene body                | N-Shore  | 3.034E-01  | 1.487E-09 |
| <i>PPP1R1A</i>    | cg01316819 | 5502   | 12 | 5'UTR/1st exon           | Island   | 3.710E-01  | 9.102E-19 |
| <i>PRICKLE1</i>   | cg16041660 | 144165 | 12 | 5'UTR/1st exon           | Island   | 3.825E-01  | 1.033E-30 |
| <i>PSMB8</i>      | cg16890093 | 5696   | 6  | TSS1500                  | S-Shore  | -3.492E-01 | 6.807E-12 |
| <i>PSME2</i>      | cg05874478 | 5721   | 14 | 1st exon                 | N-Shore  | -3.259E-01 | 2.708E-28 |
| <i>PSTPIP2</i>    | cg20670302 | 9050   | 18 | 1st exon/5'UTR           | Island   | 3.691E-01  | 6.363E-39 |
| <i>PTGDR</i>      | cg09516965 | 5729   | 14 | 1st exon/5'UTR           | Island   | 4.340E-01  | 6.579E-16 |
| <i>PTPRK</i>      | cg12148919 | 5796   | 6  | 1st exon/5'UTR           | Island   | 3.039E-01  | 1.709E-16 |
| <i>PXDN</i>       | cg12164282 | 7837   | 2  | 1st exon                 | Island   | 3.985E-01  | 1.615E-10 |
| <i>RAB32</i>      | cg23833452 | 10981  | 6  | TSS200                   | Island   | 3.713E-01  | 1.677E-14 |
| <i>RASGRF2</i>    | cg09952204 | 5924   | 5  | 1st exon                 | Island   | 3.292E-01  | 1.900E-16 |
| <i>RBP1</i>       | cg12497564 | 5947   | 3  | Gene body                | Island   | 3.270E-01  | 3.208E-09 |
| <i>RBP4</i>       | cg12331389 | 5950   | 10 | Gene body                | Island   | 3.088E-01  | 6.996E-16 |
| <i>RBP7</i>       | cg25397076 | 116362 | 1  | 1st exon/5'UTR           | Island   | 3.145E-01  | 1.539E-22 |
| <i>RET</i>        | cg05621401 | 5979   | 10 | TSS1500                  | Island   | 3.280E-01  | 7.887E-37 |
| <i>RGS11</i>      | cg03390211 | 8786   | 16 | 5'UTR/Gene body          | Island   | 4.018E-01  | 1.110E-36 |
| <i>RIPK4</i>      | cg11719297 | 54101  | 21 | 1st exon                 | Island   | 3.066E-01  | 3.309E-15 |
| <i>RNF31</i>      | cg05874478 | 55072  | 14 | TSS1500                  | N-Shore  | -3.259E-01 | 2.708E-28 |
| <i>ROR1</i>       | cg27303880 | 4919   | 1  | Gene body                | Island   | 4.043E-01  | 4.270E-19 |
| <i>ROR2</i>       | cg25766046 | 4920   | 9  | Gene body                | Island   | 3.220E-01  | 3.374E-13 |

|            |            |        |    |                          |          |            |           |
|------------|------------|--------|----|--------------------------|----------|------------|-----------|
| RPL36      | cg25136310 | 25873  | 19 | 1st exon/Gene body       | Island   | -3.230E-01 | 2.622E-28 |
| RUNX1      | cg04915566 | 861    | 21 | 5'UTR/1st exon           | Open sea | -3.390E-01 | 1.815E-12 |
| RUNX3      | cg03171924 | 864    | 1  | Gene body                | Island   | 3.124E-01  | 1.174E-14 |
| RUNX3      | cg13461622 | 864    | 1  | 1st exon/5'UTR           | Open sea | -3.337E-01 | 1.617E-12 |
| SALL4      | cg06303238 | 57167  | 20 | 1st exon/5'UTR           | Island   | 3.351E-01  | 3.206E-09 |
| SCARF2     | cg14785479 | 91179  | 22 | TSS1500                  | Island   | 3.367E-01  | 2.652E-21 |
| SEC31B     | cg20831708 | 25956  | 10 | 5'UTR                    | Island   | 3.113E-01  | 7.441E-08 |
| SEMA3C     | cg11051843 | 10512  | 7  | TSS200                   | Island   | 3.407E-01  | 2.232E-10 |
| SEPT1      | cg19663795 | 1731   | 16 | 5'UTR                    | S-Shelf  | -3.531E-01 | 4.392E-15 |
| SFRP1      | cg22418909 | 6422   | 8  | 1st exon/5'UTR           | Island   | 3.291E-01  | 3.945E-10 |
| SH3GL3     | cg22946150 | 6457   | 15 | Gene body/1st exon/5'UTR | Island   | 3.472E-01  | 2.428E-10 |
| SIX2       | cg03310469 | 10736  | 2  | TSS200                   | Island   | 3.261E-01  | 8.841E-19 |
| SLC12A5    | cg22752533 | 57468  | 20 | 1st exon/5'UTR/Gene body | Island   | 3.535E-01  | 9.439E-09 |
| SLC15A1    | cg10694152 | 6564   | 13 | Gene body                | Island   | 3.210E-01  | 3.573E-12 |
| SLC16A12   | cg09186006 | 387700 | 10 | 1st exon/5'UTR           | Island   | 3.657E-01  | 4.294E-11 |
| SLC16A12   | cg12005098 | 387700 | 10 | TSS200                   | Island   | 3.566E-01  | 1.874E-18 |
| SLC16A5    | cg27619475 | 9121   | 17 | TSS200                   | Island   | 3.250E-01  | 1.507E-35 |
| SLC18A3    | cg11389172 | 6572   | 10 | TSS200                   | Island   | 3.200E-01  | 3.153E-08 |
| SLC22A18   | cg03336167 | 5002   | 11 | Gene body                | Island   | 4.807E-01  | 1.382E-15 |
| SLC22A18   | cg16873863 | 5002   | 11 | 5'UTR                    | N-Shelf  | -3.316E-01 | 5.339E-12 |
| SLC22A18AS | cg16873863 | 5003   | 11 | 5'UTR                    | N-Shelf  | -3.316E-01 | 5.339E-12 |
| SLC22A3    | cg07237939 | 6581   | 6  | 1st exon                 | Island   | 3.559E-01  | 4.237E-12 |
| SLC26A4    | cg14646244 | 5172   | 7  | TSS1500                  | N-Shore  | -3.046E-01 | 4.185E-13 |
| SLC30A2    | cg05674944 | 7780   | 1  | Gene body                | Island   | 3.801E-01  | 2.435E-14 |
| SLC30A2    | cg07766612 | 7780   | 1  | TSS1500                  | Island   | 3.621E-01  | 8.983E-14 |
| SLC35F3    | cg25437385 | 148641 | 1  | 1st exon                 | Island   | 3.769E-01  | 1.912E-20 |
| SLC6A2     | cg04490714 | 6530   | 16 | 1st exon/5'UTR           | Island   | 3.153E-01  | 1.090E-14 |
| SLC6A2     | cg10362591 | 6530   | 16 | TSS1500                  | Island   | 3.514E-01  | 4.669E-10 |
| SLCO2A1    | cg19591206 | 6578   | 3  | 1st exon/5'UTR           | Island   | 3.206E-01  | 3.555E-20 |
| SLIT3      | cg11732619 | 6586   | 5  | 5'UTR/1st exon           | Island   | 3.464E-01  | 2.430E-17 |
| SLITRK5    | cg09083627 | 26050  | 13 | TSS1500                  | Island   | 3.649E-01  | 2.776E-11 |
| SMPD2      | cg23978557 | 6610   | 6  | TSS1500                  | N-Shore  | 3.034E-01  | 1.487E-09 |
| SNAP91     | cg21688264 | 9892   | 6  | Gene body/5'UTR          | Island   | 3.005E-01  | 3.665E-12 |
| SNCAIP     | cg04684516 | 9627   | 5  | 1st exon/5'UTR           | Island   | 3.664E-01  | 1.458E-14 |
| SNX20      | cg27081230 | 124460 | 16 | TSS1500                  | Open sea | -3.070E-01 | 1.267E-13 |
| SOX11      | cg20008332 | 6664   | 2  | 1st exon                 | Island   | 3.013E-01  | 7.104E-18 |
| SOX7       | cg08056146 | 83595  | 8  | 1st exon/5'UTR           | Island   | 3.145E-01  | 1.029E-33 |
| SPATA17    | cg01727899 | 128153 | 1  | Gene body                | S-Shore  | -3.053E-01 | 1.961E-43 |
| SPDYA      | cg04786857 | 245711 | 2  | 5'UTR                    | Island   | 3.114E-01  | 1.724E-14 |
| SPRY2      | cg11653500 | 10253  | 13 | 1st exon/5'UTR           | Island   | 3.018E-01  | 4.909E-18 |
| SSH3       | cg22285621 | 54961  | 11 | Gene body                | Island   | 3.524E-01  | 8.710E-08 |
| ST6GALNAC3 | cg26363196 | 256435 | 1  | TSS200                   | Island   | 3.109E-01  | 3.770E-16 |
| SUMO3      | cg21053323 | 6612   | 21 | Gene body                | Island   | 3.840E-01  | 1.737E-20 |
| SYNM       | cg13191049 | 23336  | 15 | 1st exon                 | Island   | 3.379E-01  | 3.415E-13 |
| SYT9       | cg08185661 | 143425 | 11 | 1st exon                 | Island   | 3.556E-01  | 8.290E-17 |
| TAP1       | cg16890093 | 6890   | 6  | 3'UTR                    | S-Shore  | -3.492E-01 | 6.807E-12 |
| TAS1R1     | cg14186992 | 80835  | 1  | 3'UTR/Gene body          | Island   | 3.485E-01  | 7.775E-23 |
| TCL1B      | cg13771579 | 9623   | 14 | 1st exon/5'UTR           | Open sea | 3.061E-01  | 1.957E-37 |
| TEAD4      | cg02915837 | 7004   | 12 | 5'UTR                    | Island   | 3.264E-01  | 2.506E-24 |
| THBD       | cg24562819 | 7056   | 20 | 1st exon                 | Island   | 3.402E-01  | 9.347E-15 |
| TLX3       | cg25720804 | 30012  | 5  | 1st exon                 | Island   | 3.405E-01  | 1.852E-09 |
| TM6SF1     | cg14696396 | 53346  | 15 | 1st exon                 | Island   | 3.625E-01  | 5.227E-09 |
| TMEM116    | cg26789453 | 89894  | 12 | TSS1500                  | S-Shore  | -3.308E-01 | 1.204E-12 |
| TMEM139    | cg09243021 | 135932 | 7  | 3'UTR                    | N-Shore  | 3.570E-01  | 5.757E-23 |
| TMEM179    | cg03734874 | 388021 | 14 | TSS1500                  | Island   | 3.536E-01  | 3.782E-12 |
| TP73       | cg00565688 | 7161   | 1  | TSS1500                  | Island   | 3.331E-01  | 1.100E-12 |
| TRAM1L1    | cg05807991 | 133022 | 4  | TSS200                   | Island   | 3.227E-01  | 4.374E-11 |
| TRHR       | cg26989103 | 7201   | 8  | TSS200                   | Open sea | -3.219E-01 | 3.653E-27 |
| TRIM31     | cg15238224 | 11074  | 6  | TSS1500                  | Open sea | -3.007E-01 | 1.422E-11 |
| TRIM40     | cg09196959 | 135644 | 6  | TSS200                   | Open sea | -3.128E-01 | 9.692E-17 |
| TSPAN32    | cg00041575 | 10077  | 11 | TSS1500                  | Open sea | -3.491E-01 | 2.475E-15 |
| UACA       | cg08815652 | 55075  | 15 | 1st exon                 | Island   | 3.017E-01  | 4.336E-22 |
| UCN        | cg04527918 | 7349   | 2  | TSS200                   | Island   | 3.304E-01  | 9.338E-21 |
| UTF1       | cg03755123 | 8433   | 10 | TSS1500                  | Island   | 3.048E-01  | 2.082E-14 |
| UTF1       | cg09053680 | 8433   | 10 | 1st exon                 | Island   | 4.394E-01  | 4.206E-08 |
| UTS2D      | cg11158430 | 257313 | 3  | 5'UTR                    | Open sea | -3.041E-01 | 7.041E-30 |
| VHL        | cg24092914 | 7428   | 3  | Gene body                | S-Shore  | -3.351E-01 | 4.041E-25 |
| VWA1       | cg25234611 | 64856  | 1  | Gene body                | Island   | 3.345E-01  | 1.292E-16 |
| WDR88      | cg26687173 | 126248 | 19 | 1st exon                 | Island   | 3.013E-01  | 1.438E-14 |
| WIPF1      | cg13821008 | 7456   | 2  | 5'UTR                    | Open sea | -3.571E-01 | 1.272E-13 |
| WIPI2      | cg20592700 | 26100  | 7  | 1st exon                 | Island   | -3.401E-01 | 2.519E-29 |
| WNK2       | cg20616414 | 65268  | 9  | 1st exon                 | Island   | 3.046E-01  | 1.040E-04 |
| WNT9B      | cg23422659 | 7484   | 17 | Gene body                | Island   | 3.701E-01  | 1.272E-45 |
| WT1        | cg01693350 | 7490   | 11 | Gene body                | Island   | 3.086E-01  | 6.345E-08 |
| WT1        | cg13641903 | 7490   | 11 | Gene body                | Island   | 3.220E-01  | 3.103E-12 |
| ZBED2      | cg25298754 | 79413  | 3  | 5'UTR                    | Open sea | -3.040E-01 | 4.153E-14 |
| ZBTB48     | cg14186992 | 3104   | 1  | TSS1500                  | Island   | 3.485E-01  | 7.775E-23 |
| ZNF148     | cg15705999 | 7707   | 3  | 5'UTR                    | Island   | -3.465E-01 | 4.974E-19 |
| ZNF454     | cg03355526 | 285676 | 5  | 5'UTR                    | Island   | 3.105E-01  | 7.369E-11 |
| ZNF718     | cg15792688 | 255403 | 4  | Gene body                | Island   | -3.449E-01 | 8.120E-34 |
| NA         | cg13912117 | NA     | 8  | NA                       | Island   | 3.390E-01  | 1.546E-16 |



---

<sup>1</sup>Probe IDs for the Infinium HumanMethylation27 BeadChip (Illumina). <sup>2</sup>TSS1500, from 200 bp upstream of the transcription start site (TSS) to 1500 bp upstream of it; TSS200, from TSS to 200 bp upstream of TSS; UTR, untranslated region; Gene body, second exon and downstream on the RefSeq database (<http://www.ncbi.nlm.nih.gov/refseq/>). <sup>3</sup>N-Shelf, 2000 bp region 5' adjacent to N-Shore; N-Shore, 2000 bp region 5' adjacent to CpG island; S-Shore, 2000 bp region 3' adjacent to CpG island; S-Shelf, 2000 bp region 3' adjacent to S-Shore based on the UCSC Genome Browser (<https://genome.ucsc.edu/>). NA, not applicable (designed in the intergenic regions).

**Supplementary Table 3.** Genes showing significant differences of DNA methylation levels in T samples compared to N samples in Clusters B1 and B2, ( $P < 0.05$  for Welch's T test after Bonferroni correction and  $\Delta\beta_{N-C} \geq 0.3$  or  $\Delta\beta_{N-C} \leq -0.3$ )

(A) Genes showing significant differences of DNA methylation levels between T and N samples in Cluster B1

| Gene symbol     | Probe ID <sup>1</sup> | National Center for<br>Biotechnology<br>Information (NCBI)<br>Gene ID | Chromosome | Gene region <sup>2</sup> | CpG type <sup>3</sup> | $\Delta\beta_{T-N}$ | <i>P</i>  |
|-----------------|-----------------------|-----------------------------------------------------------------------|------------|--------------------------|-----------------------|---------------------|-----------|
| <i>AJAP1</i>    | cg17525406            | 55966                                                                 | 1          | Gene body                | Island                | 3.091E-01           | 7.928E-03 |
| <i>C17orf93</i> | cg12374721            | 360205                                                                | 17         | TSS1500;Gene body        | N-Shore               | 3.007E-01           | 1.325E-03 |
| <i>CDO1</i>     | cg12880658            | 1036                                                                  | 5          | 1st exon/5'UTR           | Island                | 3.228E-01           | 3.323E-04 |
| <i>EYA4</i>     | cg20286200            | 2070                                                                  | 6          | TSS1500                  | Island                | 3.012E-01           | 4.724E-03 |
| <i>EYA4</i>     | cg26656135            | 2070                                                                  | 6          | 5'UTR/1st exon           | Island                | 3.101E-01           | 2.098E-03 |
| <i>FAM123A</i>  | cg22029275            | 219287                                                                | 13         | 1st exon/5'UTR           | Island                | 3.562E-01           | 1.183E-02 |
| <i>FBN1</i>     | cg18671950            | 2200                                                                  | 15         | Gene body                | Island                | 3.166E-01           | 8.007E-03 |
| <i>FLT3</i>     | cg07017374            | 2322                                                                  | 13         | Gene body                | Island                | 3.908E-01           | 1.558E-02 |
| <i>GPX7</i>     | cg16557944            | 2882                                                                  | 1          | 1st exon                 | Island                | 3.927E-01           | 1.321E-02 |
| <i>HOXD9</i>    | cg14991487            | 3235                                                                  | 2          | TSS200                   | Island                | 3.030E-01           | 1.189E-02 |
| <i>IRF4</i>     | cg12741420            | 3662                                                                  | 6          | 5'UTR                    | Island                | 3.049E-01           | 1.643E-03 |
| <i>KCNQ5</i>    | cg24687051            | 56479                                                                 | 6          | 1st exon                 | Island                | 4.592E-01           | 3.247E-03 |
| <i>PRAC</i>     | cg12374721            | 84366                                                                 | 17         | TSS1500;Gene body        | N-Shore               | 3.007E-01           | 1.325E-03 |
| <i>PRKAR1B</i>  | cg13577076            | 5575                                                                  | 7          | 5'UTR/TSS1500            | S-Shore               | 3.568E-01           | 1.420E-02 |
| <i>RYR2</i>     | cg11657808            | 6262                                                                  | 1          | Gene body                | Island                | 3.619E-01           | 9.576E-04 |
| <i>SARM1</i>    | cg23887396            | 23098                                                                 | 17         | Gene body                | Island                | 3.055E-01           | 3.788E-02 |
| <i>TFPI2</i>    | cg19784477            | 7980                                                                  | 7          | Gene body                | Island                | 3.261E-01           | 2.824E-02 |
| <i>TFPI2</i>    | cg23141855            | 7980                                                                  | 7          | Gene body                | Island                | 3.150E-01           | 1.296E-02 |
| <i>TRH</i>      | cg01009664            | 7200                                                                  | 3          | 5'UTR/1st exon           | Island                | 3.064E-01           | 3.489E-06 |
| <i>TWIST1</i>   | cg24446548            | 7291                                                                  | 7          | 1st exon/5'UTR           | Island                | 3.944E-01           | 4.042E-02 |
| <i>VIM</i>      | cg12874092            | 7431                                                                  | 10         | Gene body                | Island                | 3.710E-01           | 2.937E-02 |
| <i>ZNF132</i>   | cg13877915            | 7691                                                                  | 19         | TSS200                   | Island                | 3.483E-01           | 2.945E-02 |
| <i>ZNF154</i>   | cg21790626            | 7710                                                                  | 19         | 5'UTR/1st exon           | Island                | 3.013E-01           | 2.349E-02 |
| NA              | cg13912117            | NA                                                                    | 8          | NA                       | Island                | 3.456E-01           | 8.282E-06 |

(B) Genes showing significant differences of DNA methylation levels between T and N samples in Cluster B2

| Gene symbol    | Probe ID <sup>1</sup> | National Center for<br>Biotechnology<br>Information (NCBI)<br>Gene ID | Chromosome | Gene region <sup>2</sup> | CpG type <sup>3</sup> | $\Delta\beta_{T-N}$ | <i>P</i>  |
|----------------|-----------------------|-----------------------------------------------------------------------|------------|--------------------------|-----------------------|---------------------|-----------|
| <i>ADAM23</i>  | cg16778809            | 8745                                                                  | 2          | 1st exon/5'UTR           | Island                | 3.031E-01           | 8.126E-08 |
| <i>ATP8B2</i>  | cg08190044            | 57198                                                                 | 1          | 5'UTR                    | Island                | 3.250E-01           | 1.940E-09 |
| <i>BCL11B</i>  | cg02452985            | 64919                                                                 | 14         | 1st exon                 | Island                | -3.201E-01          | 1.178E-23 |
| <i>BEND5</i>   | cg06744574            | 79656                                                                 | 1          | 1st exon/Gene body       | N-Shore               | 3.070E-01           | 9.088E-10 |
| <i>CHST2</i>   | cg00995327            | 9435                                                                  | 3          | 5'UTR/1st exon           | Island                | 3.044E-01           | 9.969E-09 |
| <i>DAPK1</i>   | cg08797471            | 1612                                                                  | 9          | 5'UTR                    | Island                | -3.033E-01          | 4.735E-19 |
| <i>DMRT1</i>   | cg03168582            | 1761                                                                  | 9          | 1st exon                 | Island                | 3.242E-01           | 9.128E-13 |
| <i>DYNLRB2</i> | cg00720137            | 83657                                                                 | 16         | Gene body                | Island                | 3.416E-01           | 3.399E-10 |
| <i>EGFR</i>    | cg14094960            | 1956                                                                  | 7          | 1st exon/5'UTR           | Island                | -3.204E-01          | 8.516E-18 |
| <i>ELMO1</i>   | cg08453021            | 9844                                                                  | 7          | TSS200                   | Island                | 3.189E-01           | 3.558E-14 |
| <i>ELMO1</i>   | cg19118812            | 9844                                                                  | 7          | 5'UTR/1st exon           | Island                | 4.093E-01           | 2.118E-15 |
| <i>ESR1</i>    | cg20253551            | 2099                                                                  | 6          | 1st exon/Gene body       | Island                | 3.209E-01           | 2.587E-13 |
| <i>FAM123A</i> | cg22029275            | 219287                                                                | 13         | 1st exon/5'UTR           | Island                | 3.191E-01           | 3.461E-13 |
| <i>FGF2</i>    | cg25583174            | 2247                                                                  | 4          | 1st exon                 | Island                | 3.392E-01           | 3.946E-11 |
| <i>FLI1</i>    | cg17872757            | 2313                                                                  | 11         | Gene body/5'UTR          | Island                | 4.123E-01           | 3.635E-14 |
| <i>FLT3</i>    | cg07017374            | 2322                                                                  | 13         | Gene body                | Island                | 3.594E-01           | 3.089E-12 |
| <i>GPX7</i>    | cg16557944            | 2882                                                                  | 1          | 1st exon                 | Island                | 3.246E-01           | 8.444E-10 |

|                 |            |        |    |                |          |            |           |
|-----------------|------------|--------|----|----------------|----------|------------|-----------|
| <i>IRF4</i>     | cg12741420 | 3662   | 6  | 5'UTR          | Island   | 3.464E-01  | 1.118E-20 |
| <i>ITGA4</i>    | cg20415809 | 3676   | 2  | 5'UTR/1st exon | Island   | 3.815E-01  | 3.185E-17 |
| <i>JAM2</i>     | cg03382304 | 58494  | 21 | 1st exon       | Island   | 3.005E-01  | 8.910E-13 |
| <i>KCNQ5</i>    | cg24687051 | 56479  | 6  | 1st exon       | Island   | 4.432E-01  | 1.269E-16 |
| <i>NPAS2</i>    | cg14383135 | 4862   | 2  | 5'UTR          | Island   | -3.198E-01 | 9.319E-21 |
| <i>SLC22A12</i> | cg07220939 | 116085 | 11 | 1st exon/5'UTR | Open sea | -3.243E-01 | 1.472E-15 |
| <i>TWIST1</i>   | cg24446548 | 7291   | 7  | 1st exon/5'UTR | Island   | 3.417E-01  | 5.836E-11 |
| <i>VAV3</i>     | cg24662718 | 10451  | 1  | 1st exon       | Island   | 3.129E-01  | 5.771E-09 |
| <i>VIM</i>      | cg12874092 | 7431   | 10 | Gene body      | Island   | 3.491E-01  | 4.917E-12 |
| <i>ZFP82</i>    | cg25886284 | 284406 | 19 | 5'UTR/1st exon | Island   | 3.239E-01  | 1.892E-13 |
| <i>ZNF569</i>   | cg03884783 | 148266 | 19 | 5'UTR/1st exon | Island   | 3.077E-01  | 2.311E-08 |
| <i>ZNF671</i>   | cg19246110 | 79891  | 19 | 1st exon/5'UTR | Island   | 3.896E-01  | 1.901E-17 |

<sup>1</sup>Probe IDs for the Infinium HumanMethylation27 BeadChip (Illumina). <sup>2</sup>TSS1500, from the transcription start site (TSS) to 1500 bp upstream of it; TSS200, from TSS to 200 bp upstream of TSS; UTR, untranslated region; Gene body, second exon and downstream on the RefSeq database (<http://www.ncbi.nlm.nih.gov/refseq/>). <sup>3</sup>N-Shore, 2000 bp region 5' adjacent to CpG island; S-Shore, 2000 bp region 3' adjacent to CpG island; S-Shelf on the UCSC Genome Browser (<https://genome.ucsc.edu/>). NA, not applicable (designed in the intergenic regions).

**Supplementary Table 4.** Genes showing significant differences of DNA methylation levels in T samples compared to C samples in Clusters A, B1 and B2, ( $P < 0.05$  for Welch's T test after Bonferroni correction and  $\Delta\beta_{T-C} \geq 0.3$  or  $\Delta\beta_{T-C} \leq -0.3$ )

(A) Genes showing significant differences of DNA methylation levels between T and C samples in Cluster A

| Gene symbol     | Probe ID <sup>1</sup> | National Center for Biotechnology Information (NCBI) Gene ID | Chromosome | Gene region <sup>2</sup> | CpG type <sup>3</sup> | $\Delta\beta_{T-C}$ | <i>P</i>  |
|-----------------|-----------------------|--------------------------------------------------------------|------------|--------------------------|-----------------------|---------------------|-----------|
| <i>ABCC12</i>   | cg14074641            | 94160                                                        | 16         | TSS1500                  | Open sea              | -4.046E-01          | 1.105E-09 |
| <i>ABCC2</i>    | cg09448875            | 1244                                                         | 10         | TSS200                   | Open sea              | -3.709E-01          | 7.657E-06 |
| <i>ABCC2</i>    | cg17044311            | 1244                                                         | 10         | Gene body                | Open sea              | -3.410E-01          | 9.464E-05 |
| <i>ABCC9</i>    | cg20025970            | 10060                                                        | 12         | 1stExon                  | Open sea              | -3.289E-01          | 1.494E-12 |
| <i>ACCN5</i>    | cg14401592            | 51802                                                        | 4          | TSS1500                  | Open sea              | -3.101E-01          | 5.433E-06 |
| <i>ACRBP</i>    | cg25683185            | 84519                                                        | 12         | Gene body                | Island                | -3.161E-01          | 1.137E-06 |
| <i>ACTA1</i>    | cg13547644            | 58                                                           | 1          | 5'UTR                    | Island                | 3.561E-01           | 1.387E-05 |
| <i>ACTL6B</i>   | cg08572611            | 51412                                                        | 7          | Gene body                | Island                | 3.850E-01           | 6.040E-04 |
| <i>ACTN2</i>    | cg21376883            | 88                                                           | 1          | Gene body                | Island                | 3.687E-01           | 3.057E-08 |
| <i>ADAM12</i>   | cg11668923            | 8038                                                         | 10         | 1stExon/5'UTR            | Island                | 4.112E-01           | 2.974E-06 |
| <i>ADAM12</i>   | cg13488201            | 8038                                                         | 10         | TSS200                   | Island                | 3.392E-01           | 5.807E-05 |
| <i>ADAM19</i>   | cg07540118            | 8728                                                         | 5          | 1stExon/5'UTR            | Island                | 3.744E-01           | 9.303E-03 |
| <i>ADAM23</i>   | cg16778809            | 8745                                                         | 2          | 1stExon/5'UTR            | Island                | 4.076E-01           | 1.740E-02 |
| <i>ADAMTS1</i>  | cg00472814            | 9510                                                         | 21         | 1stExon/5'UTR            | Island                | 3.673E-01           | 2.188E-03 |
| <i>ADAMTS1</i>  | cg11189837            | 9510                                                         | 21         | TSS1500                  | Island                | 3.670E-01           | 9.126E-03 |
| <i>ADAMTS18</i> | cg03238797            | 170692                                                       | 16         | 1stExon/5'UTR            | Island                | 3.907E-01           | 2.114E-03 |
| <i>ADAMTS2</i>  | cg14409941            | 9509                                                         | 5          | Gene body                | Island                | 4.203E-01           | 6.383E-04 |
| <i>ADAMTS5</i>  | cg08190291            | 11096                                                        | 21         | TSS200                   | Island                | 3.501E-01           | 2.281E-04 |
| <i>ADAMTSL3</i> | cg11611600            | 57188                                                        | 15         | 5'UTR                    | Island                | 3.468E-01           | 4.314E-03 |
| <i>ADCY1</i>    | cg07651242            | 107                                                          | 7          | 1stExon                  | Island                | 4.446E-01           | 1.241E-05 |
| <i>ADCY5</i>    | cg13878010            | 111                                                          | 3          | 1stExon                  | Island                | 3.887E-01           | 1.138E-04 |
| <i>ADD2</i>     | cg25631352            | 119                                                          | 2          | TSS200                   | S-Shore               | 3.821E-01           | 4.305E-06 |
| <i>ADHFE1</i>   | cg01988129            | 137872                                                       | 8          | Gene body                | Island                | 5.781E-01           | 7.264E-11 |
| <i>ADHFE1</i>   | cg08090772            | 137872                                                       | 8          | TSS200                   | Island                | 3.517E-01           | 7.396E-05 |
| <i>ADRA1D</i>   | cg11934695            | 146                                                          | 20         | TSS1500                  | Island                | 3.083E-01           | 4.801E-03 |
| <i>ADRB3</i>    | cg17619823            | 155                                                          | 8          | 1stExon                  | Island                | 4.235E-01           | 1.767E-06 |
| <i>AEBP1</i>    | cg02126753            | 165                                                          | 7          | 1stExon/5'UTR            | Open sea              | 3.899E-01           | 8.855E-03 |
| <i>AFF3</i>     | cg06183267            | 3899                                                         | 2          | TSS200                   | Open sea              | -3.543E-01          | 1.621E-05 |
| <i>AGBL4</i>    | cg06744574            | 84871                                                        | 1          | Gene body                | N-Shore               | 3.942E-01           | 1.608E-02 |
| <i>AGR2</i>     | cg21201572            | 10551                                                        | 7          | 5'UTR/1stExon            | Open sea              | -3.074E-01          | 2.553E-07 |
| <i>AGTR1</i>    | cg04878152            | 185                                                          | 3          | 5'UTR                    | S-Shore               | 3.329E-01           | 1.794E-03 |
| <i>AGXT2</i>    | cg09745307            | 64902                                                        | 5          | TSS1500                  | Open sea              | -3.023E-01          | 2.072E-05 |
| <i>AIM2</i>     | cg10636246            | 9447                                                         | 1          | TSS1500                  | Open sea              | -4.764E-01          | 3.209E-18 |
| <i>AJAP1</i>    | cg17525406            | 55966                                                        | 1          | Gene body                | Island                | 5.289E-01           | 5.281E-08 |
| <i>AJAP1</i>    | cg20959866            | 55966                                                        | 1          | TSS1500                  | Island                | 3.792E-01           | 6.519E-08 |
| <i>AKAP12</i>   | cg01555431            | 9590                                                         | 6          | Gene body                | Island                | 4.104E-01           | 7.930E-03 |
| <i>AKR1C4</i>   | cg09272256            | 1109                                                         | 10         | 1stExon                  | Open sea              | -3.454E-01          | 6.074E-05 |
| <i>ALDH1A2</i>  | cg00930873            | 8854                                                         | 15         | TSS200                   | Island                | 3.363E-01           | 1.617E-03 |
| <i>ALDH1A2</i>  | cg03365437            | 8854                                                         | 15         | 5'UTR/1stExon            | Island                | 3.883E-01           | 8.605E-07 |
| <i>ALDH1A3</i>  | cg21359747            | 220                                                          | 15         | Gene body                | Island                | 4.290E-01           | 1.766E-03 |
| <i>ALK</i>      | cg18277754            | 238                                                          | 2          | 5'UTR/1stExon            | Island                | 3.909E-01           | 3.772E-05 |
| <i>ALX1</i>     | cg02409351            | 8092                                                         | 12         | TSS200                   | Island                | 3.138E-01           | 5.491E-03 |
| <i>ALX4</i>     | cg04988423            | 60529                                                        | 11         | 1stExon                  | Island                | 4.163E-01           | 1.004E-03 |
| <i>ALX4</i>     | cg15817236            | 60529                                                        | 11         | 1stExon                  | Island                | 3.149E-01           | 5.130E-03 |
| <i>ALX4</i>     | cg26365854            | 60529                                                        | 11         | Gene body                | Island                | 3.599E-01           | 1.500E-02 |
| <i>AMICA1</i>   | cg07376232            | 120425                                                       | 11         | Gene body/TSS1500        | Open sea              | -3.422E-01          | 1.234E-05 |
| <i>AMICA1</i>   | cg23818978            | 120425                                                       | 11         | Gene body                | Open sea              | -3.190E-01          | 6.456E-09 |
| <i>AMPH</i>     | cg10293925            | 273                                                          | 7          | 5'UTR/1stExon            | Island                | 5.313E-01           | 2.903E-08 |
| <i>AMY2A</i>    | cg22215192            | 279                                                          | 1          | Gene body                | Open sea              | -3.006E-01          | 1.643E-04 |
| <i>ANXA13</i>   | cg02800334            | 312                                                          | 8          | TSS1500                  | Open sea              | -4.015E-01          | 5.343E-10 |
| <i>AOAH</i>     | cg14451276            | 313                                                          | 7          | 1stExon/5'UTR            | Open sea              | -3.191E-01          | 2.519E-09 |
| <i>APCDD1L</i>  | cg23418591            | 164284                                                       | 20         | TSS1500                  | S-Shore               | 3.400E-01           | 3.492E-07 |
| <i>APOC2</i>    | cg13119609            | 344                                                          | 19         | 1stExon/5'UTR            | Open sea              | -3.025E-01          | 4.177E-04 |
| <i>AQP9</i>     | cg11098259            | 366                                                          | 15         | TSS200                   | Open sea              | -3.693E-01          | 4.399E-06 |
| <i>ARHGAP15</i> | cg27365426            | 55843                                                        | 2          | TSS1500                  | Open sea              | -3.471E-01          | 8.421E-07 |
| <i>ASAM</i>     | cg19096475            | 79827                                                        | 11         | TSS1500                  | Island                | 3.314E-01           | 1.013E-12 |
| <i>ATAD3C</i>   | cg11405695            | 219293                                                       | 1          | TSS1500                  | Open sea              | -3.243E-01          | 5.034E-09 |

|                  |            |        |    |                |          |            |           |
|------------------|------------|--------|----|----------------|----------|------------|-----------|
| <i>ATP10A</i>    | cg08831522 | 57194  | 15 | Gene body      | Open sea | -3.101E-01 | 1.154E-05 |
| <i>ATP2B4</i>    | cg22226839 | 493    | 1  | 5'UTR/1stExon  | N-Shelf  | 3.059E-01  | 2.523E-08 |
| <i>ATP8A2</i>    | cg18236477 | 51761  | 13 | Gene body      | Island   | 3.676E-01  | 9.134E-11 |
| <i>ATP8B2</i>    | cg08190044 | 57198  | 1  | 5'UTR          | Island   | 3.916E-01  | 4.898E-02 |
| <i>ATRNL1</i>    | cg04335339 | 26033  | 10 | TSS200         | Island   | 4.496E-01  | 5.393E-03 |
| <i>AZGP1</i>     | cg12019109 | 563    | 7  | TSS1500        | Open sea | -3.369E-01 | 1.677E-06 |
| <i>B3GALT5</i>   | cg11479877 | 10317  | 21 | 1stExon/5'UTR  | Open sea | -3.224E-01 | 3.346E-05 |
| <i>B3GAT1</i>    | cg11038843 | 27087  | 11 | 5'UTR          | Island   | 3.248E-01  | 1.460E-02 |
| <i>BAALC</i>     | cg10918202 | 79870  | 8  | 1stExon        | Island   | 4.078E-01  | 1.490E-03 |
| <i>BASP1</i>     | cg23496260 | 10409  | 5  | 5'UTR          | Island   | 3.945E-01  | 1.061E-04 |
| <i>BATF</i>      | cg15645309 | 10538  | 14 | TSS200         | Open sea | -3.122E-01 | 2.113E-10 |
| <i>BCAN</i>      | cg21475402 | 63827  | 1  | 5'UTR          | Island   | 3.495E-01  | 2.755E-03 |
| <i>BEND5</i>     | cg06744574 | 79656  | 1  | 1stExon        | N-Shore  | 3.942E-01  | 1.608E-02 |
| <i>BFSP2</i>     | cg20383064 | 8419   | 3  | TSS1500        | Open sea | -3.276E-01 | 2.465E-03 |
| <i>BLNK</i>      | cg16779976 | 29760  | 10 | 1stExon        | Open sea | -3.515E-01 | 7.978E-13 |
| <i>BMP3</i>      | cg01049530 | 651    | 4  | TSS200         | Island   | 4.363E-01  | 1.213E-03 |
| <i>BMPR1B</i>    | cg09156233 | 658    | 4  | 5'UTR          | Island   | 3.073E-01  | 3.332E-02 |
| <i>BNC1</i>      | cg10398682 | 646    | 15 | Gene body      | Island   | 3.477E-01  | 4.796E-10 |
| <i>BNC1</i>      | cg18952647 | 646    | 15 | TSS1500        | Island   | 4.856E-01  | 2.325E-12 |
| <i>BNC1</i>      | cg19988449 | 646    | 15 | Gene body      | Island   | 3.354E-01  | 3.761E-06 |
| <i>BNC2</i>      | cg14613546 | 54796  | 9  | Gene body      | S-Shore  | -3.033E-01 | 3.000E-04 |
| <i>BOLL</i>      | cg17560332 | 66037  | 2  | TSS1500        | Island   | 3.608E-01  | 4.265E-09 |
| <i>BPI</i>       | cg08254089 | 671    | 20 | Gene body      | Open sea | -3.476E-01 | 2.002E-07 |
| <i>BPIL3</i>     | cg18223379 | 128859 | 20 | Gene body      | Open sea | -3.236E-01 | 1.204E-04 |
| <i>BPTF</i>      | cg16435601 | 2186   | 17 | 1stExon        | S-Shore  | -3.585E-01 | 3.251E-19 |
| <i>BRCA1</i>     | cg06973652 | 672    | 17 | TSS1500        | S-Shore  | -3.531E-01 | 2.522E-02 |
| <i>BTG4</i>      | cg01192900 | 54766  | 11 | TSS1500        | Island   | 3.252E-01  | 3.803E-02 |
| <i>BTG4</i>      | cg22879515 | 54766  | 11 | TSS1500        | Island   | 4.080E-01  | 3.958E-02 |
| <i>BTG4</i>      | cg23211240 | 54766  | 11 | TSS1500        | Island   | 3.406E-01  | 1.056E-03 |
| <i>BVES</i>      | cg20624391 | 11149  | 6  | 5'UTR/1stExon  | Island   | 3.281E-01  | 5.405E-04 |
| <i>C10orf25</i>  | cg00899659 | 220979 | 10 | Gene body      | N-Shore  | -3.684E-01 | 2.586E-07 |
| <i>C10orf72</i>  | cg02569613 | 196740 | 10 | Gene body      | N-Shore  | 3.098E-01  | 2.012E-04 |
| <i>C11orf21</i>  | cg00041575 | 29125  | 11 | Gene body      | Open sea | -4.088E-01 | 3.291E-11 |
| <i>C13orf30</i>  | cg07409200 | 144809 | 13 | TSS1500        | Open sea | -3.041E-01 | 1.982E-03 |
| <i>C13orf30</i>  | cg26682500 | 144809 | 13 | 5'UTR          | Open sea | -3.270E-01 | 2.248E-03 |
| <i>C14orf139</i> | cg10145926 | 161176 | 14 | Gene body      | Open sea | -3.141E-01 | 4.328E-06 |
| <i>C14orf162</i> | cg14912575 | 56936  | 14 | TSS1500        | Island   | 3.059E-01  | 9.834E-05 |
| <i>C14orf93</i>  | cg03565081 | 60686  | 14 | 5'UTR          | N-Shore  | -3.362E-01 | 1.135E-11 |
| <i>C17orf73</i>  | cg03016571 | 55018  | 17 | Gene body      | Open sea | -3.821E-01 | 2.847E-06 |
| <i>C17orf93</i>  | cg12374721 | 360205 | 17 | TSS1500        | N-Shore  | 4.794E-01  | 2.764E-10 |
| <i>C18orf20</i>  | cg10054857 | 221241 | 18 | TSS1500        | Open sea | -3.396E-01 | 1.249E-06 |
| <i>C18orf34</i>  | cg05245861 | 374864 | 18 | TSS1500/5'UTR  | Island   | 3.410E-01  | 4.209E-05 |
| <i>C1orf150</i>  | cg05767404 | 148823 | 1  | Gene body      | Open sea | -3.793E-01 | 3.242E-07 |
| <i>C1orf158</i>  | cg24338843 | 93190  | 1  | Gene body      | Open sea | -3.919E-01 | 4.202E-09 |
| <i>C1orf59</i>   | cg00328227 | 113802 | 1  | TSS200/TSS1500 | Island   | -3.574E-01 | 4.192E-11 |
| <i>C1QB</i>      | cg22477971 | 713    | 1  | 5'UTR          | Open sea | -3.007E-01 | 3.811E-05 |
| <i>C20orf71</i>  | cg01671881 | 128861 | 20 | TSS1500        | Open sea | -3.209E-01 | 9.360E-05 |
| <i>C21orf121</i> | cg18963171 | 150142 | 21 | Gene body      | Open sea | -3.134E-01 | 2.605E-06 |
| <i>C21orf129</i> | cg10198932 | 150135 | 21 | TSS1500        | Open sea | -3.059E-01 | 5.161E-09 |
| <i>C4orf39</i>   | cg00393585 | 152756 | 4  | TSS200         | Island   | 3.918E-01  | 7.515E-03 |
| <i>C8orf56</i>   | cg10918202 | 157556 | 8  | Gene body      | Island   | 4.078E-01  | 1.490E-03 |
| <i>C9orf16</i>   | cg24392274 | 79095  | 9  | TSS1500        | N-Shore  | -3.094E-01 | 1.041E-11 |
| <i>CACNB2</i>    | cg01805540 | 783    | 10 | 1stExon        | Island   | 5.342E-01  | 9.690E-16 |
| <i>CASP2</i>     | cg09243021 | 835    | 7  | TSS1500        | N-Shore  | 3.462E-01  | 5.769E-06 |
| <i>CASP8</i>     | cg26799474 | 841    | 2  | 5'UTR          | Open sea | -3.570E-01 | 2.006E-16 |
| <i>CBLN2</i>     | cg21902544 | 147381 | 18 | 1stExon/5'UTR  | Island   | 3.333E-01  | 8.389E-05 |
| <i>CBLN4</i>     | cg25993718 | 140689 | 20 | TSS200         | Island   | 3.674E-01  | 7.652E-10 |
| <i>CCDC106</i>   | cg12582959 | 29903  | 19 | 5'UTR/1stExon  | N-Shore  | 3.177E-01  | 8.849E-04 |
| <i>CCDC141</i>   | cg12501949 | 285025 | 2  | TSS1500        | Open sea | -3.364E-01 | 2.797E-06 |
| <i>CCDC27</i>    | cg08670691 | 148870 | 1  | TSS200         | Open sea | -3.319E-01 | 1.185E-09 |
| <i>CCDC37</i>    | cg00891278 | 348807 | 3  | 1stExon/5'UTR  | Island   | 3.657E-01  | 9.107E-05 |
| <i>CCDC37</i>    | cg20312228 | 348807 | 3  | TSS200         | Island   | 3.367E-01  | 7.496E-07 |
| <i>CCKAR</i>     | cg04353483 | 886    | 4  | TSS1500        | Open sea | -3.465E-01 | 9.650E-06 |

|             |            |           |    |                       |          |            |           |
|-------------|------------|-----------|----|-----------------------|----------|------------|-----------|
| CCL1        | cg17118262 | 6346      | 17 | TSS1500               | Open sea | -3.313E-01 | 6.978E-10 |
| CCL14-CCL15 | cg23743114 | NA        | 17 | Gene body             | Open sea | -4.982E-01 | 4.220E-09 |
| CCL14-CCL15 | cg26548883 | NA        | 17 | TSS1500               | Open sea | -3.434E-01 | 3.324E-10 |
| CCL15       | cg23743114 | 6359      | 17 | Gene body             | Open sea | -4.982E-01 | 4.220E-09 |
| CCL15       | cg26548883 | 6359      | 17 | TSS1500               | Open sea | -3.434E-01 | 3.324E-10 |
| CCL20       | cg09425228 | 6364      | 2  | TSS1500               | Open sea | -3.544E-01 | 1.608E-06 |
| CCL20       | cg21643045 | 6364      | 2  | 1stExon               | Open sea | -3.020E-01 | 8.543E-04 |
| CCL7        | cg02936263 | 6354      | 17 | TSS1500               | Open sea | -3.338E-01 | 3.989E-07 |
| CCL8        | cg27000831 | 6355      | 17 | TSS1500               | Open sea | -3.090E-01 | 6.181E-11 |
| CCNA1       | cg12571423 | 8900      | 13 | 5'UTR/1stExon         | S-Shore  | 3.818E-01  | 6.778E-07 |
| CCNA1       | cg13060997 | 8900      | 13 | 5'UTR/1stExon         | S-Shore  | 3.015E-01  | 3.776E-03 |
| CD163       | cg07264679 | 9332      | 12 | TSS1500               | Open sea | -3.076E-01 | 6.646E-04 |
| CD1B        | cg04574507 | 910       | 1  | Gene body             | Open sea | -3.821E-01 | 6.696E-06 |
| CD1C        | cg07548313 | 911       | 1  | Gene body             | Open sea | -3.416E-01 | 6.556E-04 |
| CD1E        | cg09478478 | 913       | 1  | TSS1500               | Open sea | -3.382E-01 | 1.047E-04 |
| CD2         | cg16719404 | 914       | 1  | TSS1500               | Open sea | -3.475E-01 | 1.460E-08 |
| CD209       | cg07608333 | 30835     | 19 | TSS1500               | Open sea | -4.295E-01 | 2.069E-11 |
| CD300E      | cg04995095 | 342510    | 17 | Gene body             | Open sea | -3.932E-01 | 1.738E-06 |
| CD300LB     | cg10523494 | 124599    | 17 | TSS1500               | Open sea | -3.391E-01 | 1.738E-12 |
| CD37        | cg10037005 | 951       | 19 | TSS200                | N-Shelf  | -4.333E-01 | 5.118E-08 |
| CD38        | cg26043257 | 952       | 4  | 1stExon               | Island   | 3.613E-01  | 1.087E-02 |
| CD53        | cg22325572 | 963       | 1  | 5'UTR                 | Open sea | -3.788E-01 | 4.923E-05 |
| CD5L        | cg01637734 | 922       | 1  | Gene body             | Open sea | -3.918E-01 | 1.579E-05 |
| CD80        | cg21572897 | 941       | 3  | 5'UTR                 | Open sea | -3.169E-01 | 4.127E-05 |
| CD8A        | cg17108819 | 925       | 2  | 5'UTR/1stExon         | Island   | 4.135E-01  | 1.326E-02 |
| CDH11       | cg12163490 | 1009      | 16 | 5'UTR/1stExon         | Island   | 3.259E-01  | 5.837E-03 |
| CDH13       | cg00806490 | 1012      | 16 | Gene body             | Island   | 3.797E-01  | 6.104E-06 |
| CDH17       | cg12038710 | 1015      | 8  | 5'UTR                 | Open sea | -3.573E-01 | 5.914E-04 |
| CDH18       | cg27043873 | 1016      | 5  | 5'UTR                 | Open sea | -4.553E-01 | 3.828E-06 |
| CDH2        | cg22679003 | 1000      | 18 | Gene body             | Island   | 3.044E-01  | 3.327E-02 |
| CDH8        | cg11323198 | 1006      | 16 | 5'UTR                 | Island   | 4.032E-01  | 1.859E-09 |
| CDO1        | cg12880658 | 1036      | 5  | 1stExon/5'UTR         | Island   | 3.757E-01  | 2.270E-06 |
| CEBPG       | cg15046693 | 1054      | 19 | TSS1500               | N-Shore  | -3.438E-01 | 9.194E-13 |
| CECR4       | cg22815534 | 100130717 | 22 | Gene body             | Open sea | -3.356E-01 | 8.749E-08 |
| CECR5       | cg22815534 | 27440     | 22 | TSS200                | Open sea | -3.356E-01 | 8.749E-08 |
| CELSR1      | cg06268694 | 9620      | 22 | 1stExon               | Island   | 4.199E-01  | 1.856E-06 |
| CENPP       | cg24105685 | 401541    | 9  | Gene body             | Open sea | -3.516E-01 | 1.203E-05 |
| CHAT        | cg11389172 | 1103      | 10 | 5'UTR                 | Island   | 4.355E-01  | 1.321E-08 |
| CHAT        | cg14008883 | 1103      | 10 | 5'UTR                 | Island   | 3.505E-01  | 3.356E-11 |
| CHRM5       | cg22927134 | 1133      | 15 | 5'UTR                 | Open sea | -3.209E-01 | 9.694E-05 |
| CHRNA3      | cg04603031 | 1136      | 15 | 5'UTR/1stExon         | Island   | 3.616E-01  | 1.959E-04 |
| CHRNA6      | cg07906724 | 8973      | 8  | TSS1500               | Open sea | -4.047E-01 | 6.905E-14 |
| CIDEA       | cg20950011 | 1149      | 18 | TSS1500/1stExon/5'UTR | Island   | 3.162E-01  | 1.661E-04 |
| CLEC2D      | cg12810837 | 29121     | 12 | TSS200                | Open sea | -4.101E-01 | 3.843E-07 |
| CLRN3       | cg23817637 | 119467    | 10 | TSS1500               | Open sea | -3.621E-01 | 4.124E-11 |
| CLSTN2      | cg08853659 | 64084     | 3  | 1stExon               | Island   | 4.529E-01  | 6.175E-04 |
| CMTM2       | cg01683883 | 146225    | 16 | TSS1500               | Island   | 3.287E-01  | 1.635E-10 |
| CNIH3       | cg00290506 | 149111    | 1  | 1stExon/5'UTR         | Island   | 4.773E-01  | 2.033E-09 |
| CNR1        | cg23276695 | 1268      | 6  | 5'UTR                 | Open sea | -4.341E-01 | 1.062E-11 |
| CNR2        | cg26151675 | 1269      | 1  | TSS1500               | Open sea | -3.011E-01 | 6.657E-12 |
| CNRIP1      | cg07080358 | 25927     | 2  | 1stExon               | Island   | 5.441E-01  | 3.686E-09 |
| CNTN1       | cg27352992 | 1272      | 12 | 5'UTR                 | Island   | 3.036E-01  | 1.734E-02 |
| CNTNAP2     | cg07028533 | 26047     | 7  | TSS200                | Island   | 3.301E-01  | 8.484E-04 |
| CNTNAP2     | cg16254309 | 26047     | 7  | Gene body             | S-Shore  | 3.450E-01  | 2.827E-03 |
| COL15A1     | cg19461644 | 1306      | 9  | Gene body             | Island   | 3.906E-01  | 7.589E-07 |
| COL23A1     | cg10730712 | 91522     | 5  | TSS1500               | S-Shore  | 3.758E-01  | 6.103E-03 |
| COL4A1      | cg27546237 | 1282      | 13 | TSS1500               | Island   | 4.182E-01  | 2.464E-09 |
| COL4A2      | cg27546237 | 1284      | 13 | Gene body             | Island   | 4.182E-01  | 2.464E-09 |
| COL5A1      | cg26024843 | 1289      | 9  | 1stExon/5'UTR         | Island   | 3.226E-01  | 6.590E-05 |
| COL9A1      | cg21789545 | 1297      | 6  | Gene body             | Open sea | -3.202E-01 | 4.528E-04 |
| COLEC12     | cg19461621 | 81035     | 18 | TSS1500               | S-Shore  | 3.297E-01  | 2.768E-02 |
| COX7B2      | cg25463409 | 170712    | 4  | 5'UTR                 | Open sea | -3.059E-01 | 1.764E-05 |
| CPA3        | cg24290574 | 1359      | 3  | 1stExon               | Open sea | -4.183E-01 | 2.742E-07 |

|                 |            |        |    |               |          |            |           |
|-----------------|------------|--------|----|---------------|----------|------------|-----------|
| <i>CPA4</i>     | cg19690404 | 51200  | 7  | Gene body     | Open sea | -3.440E-01 | 1.710E-11 |
| <i>CPB2</i>     | cg14662172 | 1361   | 13 | 1stExon       | Open sea | -4.584E-01 | 1.921E-06 |
| <i>CPE</i>      | cg02886284 | 1363   | 4  | 5'UTR/1stExon | Island   | 3.859E-01  | 2.594E-02 |
| <i>CPNE8</i>    | cg23495733 | 144402 | 12 | Gene body     | N-Shore  | 3.006E-01  | 1.828E-03 |
| <i>CRHR2</i>    | cg04922810 | 1395   | 7  | 1stExon       | Island   | 3.401E-01  | 6.436E-05 |
| <i>CRHR2</i>    | cg14896516 | 1395   | 7  | TSS1500       | Island   | 3.758E-01  | 6.346E-03 |
| <i>CRISPLD1</i> | cg05624932 | 83690  | 8  | 5'UTR         | S-Shore  | 3.795E-01  | 2.180E-02 |
| <i>CRMP1</i>    | cg03544320 | 1400   | 4  | 1stExon       | Island   | 4.092E-01  | 1.484E-06 |
| <i>CRTAM</i>    | cg10977115 | 56253  | 11 | Gene body     | Open sea | -3.084E-01 | 5.217E-07 |
| <i>CSMD1</i>    | cg22619018 | 64478  | 8  | TSS1500       | Island   | 4.432E-01  | 3.574E-03 |
| <i>CSMD3</i>    | cg06821993 | 114788 | 8  | 1stExon       | S-Shelf  | 3.093E-01  | 5.947E-04 |
| <i>CSNK1A1L</i> | cg01668383 | 122011 | 13 | 1stExon/5'UTR | Open sea | -3.477E-01 | 8.782E-07 |
| <i>CST7</i>     | cg11804789 | 8530   | 20 | TSS200        | Open sea | -4.270E-01 | 1.699E-08 |
| <i>CSTL1</i>    | cg20171451 | 128817 | 20 | TSS1500       | Open sea | 3.370E-01  | 4.152E-29 |
| <i>CTLA4</i>    | cg08460026 | 1493   | 2  | TSS200        | Open sea | -3.361E-01 | 1.865E-04 |
| <i>CTNNA3</i>   | cg00132141 | 29119  | 10 | TSS1500       | Open sea | -3.209E-01 | 1.457E-04 |
| <i>CTNND2</i>   | cg10331779 | 1501   | 5  | TSS1500       | S-Shore  | 3.519E-01  | 7.427E-08 |
| <i>CTNND2</i>   | cg25302419 | 1501   | 5  | 5'UTR/1stExon | Island   | 4.216E-01  | 2.295E-05 |
| <i>CUX2</i>     | cg09229912 | 23316  | 12 | 1stExon/5'UTR | Island   | 5.216E-01  | 1.798E-16 |
| <i>CUX2</i>     | cg17190608 | 23316  | 12 | TSS1500       | Island   | 3.805E-01  | 7.981E-05 |
| <i>CWH43</i>    | cg04005707 | 80157  | 4  | 1stExon/5'UTR | Island   | 3.656E-01  | 5.335E-04 |
| <i>CWH43</i>    | cg25484904 | 80157  | 4  | TSS1500       | Island   | 3.509E-01  | 6.054E-08 |
| <i>CXCR1</i>    | cg13519373 | 3577   | 2  | 5'UTR         | Open sea | -4.236E-01 | 2.253E-11 |
| <i>CYP11A1</i>  | cg17790333 | 1583   | 15 | TSS200        | S-Shore  | -3.408E-01 | 5.203E-06 |
| <i>CYP11B2</i>  | cg10500909 | 1585   | 8  | TSS1500       | Open sea | -3.043E-01 | 1.628E-06 |
| <i>CYP1A2</i>   | cg04968473 | 1544   | 15 | TSS1500       | Open sea | -3.073E-01 | 1.237E-08 |
| <i>CYP26B1</i>  | cg04884908 | 56603  | 2  | 1stExon       | Island   | 3.384E-01  | 2.093E-02 |
| <i>CYSLTR2</i>  | cg16886259 | 57105  | 13 | 1stExon       | Open sea | -3.423E-01 | 9.613E-04 |
| <i>DAB1</i>     | cg00848728 | 1600   | 1  | 5'UTR/1stExon | Island   | 3.205E-01  | 3.237E-03 |
| <i>DBC1</i>     | cg25935911 | 1620   | 9  | TSS1500       | S-Shore  | 3.301E-01  | 5.006E-05 |
| <i>DCC</i>      | cg01839464 | 1630   | 18 | Gene body     | Island   | 3.935E-01  | 1.569E-08 |
| <i>DCC</i>      | cg23242898 | 1630   | 18 | Gene body     | N-Shore  | 3.771E-01  | 1.985E-05 |
| <i>DCD</i>      | cg13396068 | 117159 | 12 | Gene body     | Open sea | -3.434E-01 | 1.614E-05 |
| <i>DCD</i>      | cg25372195 | 117159 | 12 | TSS200        | Open sea | -3.860E-01 | 7.978E-08 |
| <i>DEC1</i>     | cg26981881 | 50514  | 9  | TSS1500       | Open sea | -3.257E-01 | 4.669E-04 |
| <i>DEFA6</i>    | cg07974303 | 1671   | 8  | TSS1500       | Open sea | -3.264E-01 | 2.738E-04 |
| <i>DEFB118</i>  | cg03014957 | 117285 | 20 | TSS1500       | Open sea | -3.183E-01 | 1.406E-07 |
| <i>DEFB118</i>  | cg20312687 | 117285 | 20 | Gene body     | Open sea | -3.773E-01 | 6.717E-07 |
| <i>DEFB123</i>  | cg19241311 | 245936 | 20 | Gene body     | Open sea | -3.135E-01 | 1.821E-04 |
| <i>DEFB129</i>  | cg02046532 | 140881 | 20 | TSS200        | Open sea | -3.457E-01 | 1.510E-05 |
| <i>DEGS1</i>    | cg23213217 | 8560   | 1  | TSS1500       | N-Shore  | -3.352E-01 | 2.266E-14 |
| <i>DES</i>      | cg18182399 | 1674   | 2  | 1stExon/5'UTR | N-Shore  | 3.393E-01  | 2.463E-03 |
| <i>DGKI</i>     | cg06277657 | 9162   | 7  | TSS1500       | Island   | 3.976E-01  | 8.790E-11 |
| <i>DHFR</i>     | cg08244028 | 1719   | 5  | Gene body     | N-Shore  | -3.068E-01 | 4.406E-06 |
| <i>DHFR</i>     | cg10180697 | 1719   | 5  | Gene body     | N-Shore  | -3.061E-01 | 2.337E-06 |
| <i>DLK1</i>     | cg17412258 | 8788   | 14 | TSS1500       | Island   | 4.074E-01  | 6.770E-06 |
| <i>DLX5</i>     | cg00503840 | 1749   | 7  | Gene body     | Island   | 3.221E-01  | 4.005E-10 |
| <i>DLX5</i>     | cg09150117 | 1749   | 7  | 1stExon       | Island   | 3.426E-01  | 2.998E-02 |
| <i>DLX5</i>     | cg11500797 | 1749   | 7  | Gene body     | Island   | 3.514E-01  | 9.234E-05 |
| <i>DLX5</i>     | cg11997899 | 1749   | 7  | TSS200        | Island   | 3.482E-01  | 1.147E-08 |
| <i>DLX5</i>     | cg13462129 | 1749   | 7  | Gene body     | Island   | 3.584E-01  | 7.301E-10 |
| <i>DMBX1</i>    | cg09914444 | 127343 | 1  | TSS1500       | Open sea | -4.056E-01 | 1.858E-08 |
| <i>DMKN</i>     | cg10133777 | 93099  | 19 | TSS1500       | Open sea | -4.299E-01 | 1.463E-10 |
| <i>DMRT1</i>    | cg03168582 | 1761   | 9  | 1stExon       | Island   | 5.389E-01  | 3.850E-06 |
| <i>DMRT2</i>    | cg00250430 | 10655  | 9  | 5'UTR         | N-Shore  | 4.126E-01  | 5.926E-09 |
| <i>DMRT2</i>    | cg11530960 | 10655  | 9  | Gene body     | Island   | 3.552E-01  | 4.695E-10 |
| <i>DMRT3</i>    | cg12420104 | 58524  | 9  | 1stExon       | Island   | 4.326E-01  | 1.988E-06 |
| <i>DOK5</i>     | cg11822659 | 55816  | 20 | Gene body     | Island   | 3.595E-01  | 3.999E-05 |
| <i>DPP6</i>     | cg26738880 | 1804   | 7  | Gene body     | Open sea | -3.876E-01 | 2.507E-09 |
| <i>DPPA2</i>    | cg11759378 | 151871 | 3  | TSS200        | Open sea | -3.292E-01 | 4.444E-05 |
| <i>DPYS</i>     | cg10303487 | 1807   | 8  | 1stExon       | Island   | 4.961E-01  | 5.578E-11 |
| <i>DPYSL4</i>   | cg12109455 | 10570  | 10 | Gene body     | Island   | 3.838E-01  | 1.054E-06 |
| <i>DRD4</i>     | cg06825142 | 1815   | 11 | TSS200        | Island   | 3.590E-01  | 3.930E-02 |

|         |            |        |    |                   |          |            |           |
|---------|------------|--------|----|-------------------|----------|------------|-----------|
| DSCR10  | cg17233935 | 259234 | 21 | TSS1500           | Open sea | -3.978E-01 | 2.543E-08 |
| DTX1    | cg11939071 | 1840   | 12 | TSS1500           | Island   | 3.367E-01  | 1.837E-02 |
| DUSP2   | cg01148741 | 1844   | 2  | TSS1500           | Island   | -3.287E-01 | 2.161E-09 |
| DYM     | cg12875426 | 54808  | 18 | TSS1500           | S-Shore  | -3.160E-01 | 4.981E-06 |
| DYNLRB2 | cg00720137 | 83657  | 16 | Gene body         | Island   | 4.068E-01  | 2.589E-03 |
| DYRK2   | cg21281799 | 8445   | 12 | TSS1500           | N-Shore  | -3.577E-01 | 4.215E-07 |
| EBPL    | cg20399252 | 84650  | 13 | TSS1500           | S-Shore  | -4.097E-01 | 6.935E-06 |
| ECEL1   | cg25431974 | 9427   | 2  | TSS1500           | Island   | 3.580E-01  | 4.019E-06 |
| ECM2    | cg24105685 | 1842   | 9  | TSS1500           | Open sea | -3.516E-01 | 1.203E-05 |
| EDIL3   | cg03478689 | 10085  | 5  | TSS200            | Island   | 3.384E-01  | 5.793E-06 |
| EDIL3   | cg16773899 | 10085  | 5  | 5'UTR/1stExon     | Island   | 4.044E-01  | 1.235E-09 |
| EDNRB   | cg15836660 | 1910   | 13 | 5'UTR/TSS200      | Island   | 3.054E-01  | 4.570E-04 |
| EDNRB   | cg23316360 | 1910   | 13 | 5'UTR/1stExon     | Island   | 4.755E-01  | 3.550E-08 |
| EFCAB1  | cg22836229 | 79645  | 8  | 5'UTR/1stExon     | Island   | 4.419E-01  | 2.363E-11 |
| EFHA2   | cg26831415 | 286097 | 8  | Gene body         | Island   | 3.377E-01  | 1.028E-02 |
| EIF4E3  | cg13562542 | 317649 | 3  | 5'UTR             | Island   | 4.303E-01  | 4.020E-05 |
| ELMO1   | cg08453021 | 9844   | 7  | TSS200            | Island   | 4.240E-01  | 1.136E-04 |
| ELMO1   | cg19118812 | 9844   | 7  | 5'UTR/1stExon     | Island   | 4.785E-01  | 1.374E-03 |
| ELOVL2  | cg13562911 | 54898  | 6  | Gene body         | Island   | 5.210E-01  | 1.222E-05 |
| ELOVL4  | cg13297865 | 6785   | 6  | TSS200            | Island   | 3.655E-01  | 4.670E-02 |
| ENO2    | cg13334990 | 2026   | 12 | 1stExon/5'UTR     | Island   | 3.416E-01  | 3.140E-10 |
| ENOX1   | cg21817450 | 55068  | 13 | 5'UTR             | Open sea | -3.348E-01 | 2.917E-07 |
| EPB41L3 | cg00027083 | 23136  | 18 | 5'UTR             | Island   | 4.180E-01  | 5.848E-10 |
| EPDR1   | cg27641018 | 54749  | 7  | TSS1500           | N-Shore  | -3.094E-01 | 2.894E-04 |
| EPHA5   | cg18420965 | 2044   | 4  | Gene body         | N-Shore  | 3.697E-01  | 1.917E-03 |
| EPHA7   | cg08001895 | 2045   | 6  | TSS1500           | Island   | 3.479E-01  | 3.513E-03 |
| EPO     | cg08575537 | 2056   | 7  | Gene body         | Island   | 4.268E-01  | 9.373E-05 |
| ERBB4   | cg07015629 | 2066   | 2  | 1stExon           | Island   | 3.968E-01  | 3.305E-03 |
| ERBB4   | cg20637307 | 2066   | 2  | TSS1500           | S-Shore  | 4.658E-01  | 6.916E-03 |
| ERC2    | cg04759439 | 26059  | 3  | TSS1500           | Island   | 4.199E-01  | 5.299E-06 |
| ERP29   | cg26789453 | 10961  | 12 | Gene body         | S-Shore  | -3.681E-01 | 2.540E-12 |
| ESR1    | cg20253551 | 2099   | 6  | Gene body/1stExon | Island   | 3.510E-01  | 6.830E-03 |
| EYA4    | cg01805282 | 2070   | 6  | 5'UTR             | Island   | 3.885E-01  | 1.883E-09 |
| EYA4    | cg20286200 | 2070   | 6  | TSS1500           | Island   | 3.543E-01  | 2.331E-04 |
| EYA4    | cg20330472 | 2070   | 6  | TSS1500           | N-Shore  | 3.478E-01  | 5.713E-03 |
| EYA4    | cg24176563 | 2070   | 6  | 5'UTR/1stExon     | Island   | 3.791E-01  | 6.717E-08 |
| EYA4    | cg26656135 | 2070   | 6  | 5'UTR/1stExon     | Island   | 3.792E-01  | 5.703E-07 |
| FABP4   | cg10062803 | 2167   | 8  | TSS1500           | Open sea | -3.247E-01 | 7.728E-04 |
| FADS2   | cg07005513 | 9415   | 11 | 1stExon           | Island   | 3.523E-01  | 6.201E-03 |
| FAM101A | cg21453309 | 144347 | 12 | 5'UTR             | Open sea | 3.146E-01  | 1.969E-05 |
| FAM123A | cg22029275 | 219287 | 13 | 1stExon/5'UTR     | Island   | 5.123E-01  | 1.151E-06 |
| FAM135B | cg15642035 | 51059  | 8  | Gene body         | Open sea | -3.348E-01 | 1.340E-04 |
| FAM150A | cg17162024 | 389658 | 8  | TSS1500           | Island   | 5.246E-01  | 2.581E-15 |
| FAM150A | cg26021627 | 389658 | 8  | TSS1500           | S-Shore  | 3.042E-01  | 6.099E-03 |
| FAM19A4 | cg13921352 | 151647 | 3  | TSS200            | Island   | 4.238E-01  | 1.126E-04 |
| FAM20A  | cg13591701 | 54757  | 17 | 5'UTR/1stExon     | Island   | 3.730E-01  | 1.143E-02 |
| FAM20B  | cg01426743 | 9917   | 1  | TSS1500           | N-Shore  | -3.140E-01 | 7.195E-05 |
| FAM43B  | cg20404387 | 163933 | 1  | 1stExon/5'UTR     | Island   | 3.507E-01  | 1.278E-04 |
| FAM5B   | cg13843613 | 57795  | 1  | TSS1500           | Island   | 3.240E-01  | 2.133E-03 |
| FANCA   | cg24800887 | 2175   | 16 | TSS1500           | S-Shore  | -3.308E-01 | 3.782E-04 |
| FBN1    | cg18671950 | 2200   | 15 | Gene body         | Island   | 4.005E-01  | 6.770E-05 |
| FBN2    | cg25084878 | 2201   | 5  | 1stExon/5'UTR     | Island   | 5.269E-01  | 7.565E-18 |
| FBXO39  | cg20723355 | 162517 | 17 | 5'UTR             | Island   | 4.558E-01  | 9.490E-11 |
| FCAR    | cg05252264 | 2204   | 19 | 1stExon           | Open sea | -3.370E-01 | 9.635E-09 |
| FCER1A  | cg14696870 | 2205   | 1  | TSS1500           | Open sea | -3.602E-01 | 2.351E-04 |
| FCGR3B  | cg00974864 | 2215   | 1  | 5'UTR/1stExon     | Open sea | -3.015E-01 | 4.967E-04 |
| FCRL2   | cg15761405 | 79368  | 1  | Gene body         | Open sea | -3.275E-01 | 4.971E-06 |
| FCRL3   | cg08786003 | 115352 | 1  | TSS200            | Open sea | -4.397E-01 | 9.400E-09 |
| FCRL3   | cg25259754 | 115352 | 1  | Gene body         | Open sea | -4.012E-01 | 1.009E-13 |
| FCRL5   | cg03329572 | 83416  | 1  | TSS1500           | Open sea | -3.266E-01 | 1.320E-03 |
| FERD3L  | cg25691167 | 222894 | 7  | 1stExon           | Island   | 4.246E-01  | 7.705E-08 |
| FGF3    | cg15337897 | 2248   | 11 | TSS1500           | Island   | 3.599E-01  | 1.155E-02 |
| FIP1L1  | cg19408398 | 81608  | 4  | TSS1500           | N-Shore  | -3.157E-01 | 9.347E-07 |



|         |            |        |    |                       |          |            |           |
|---------|------------|--------|----|-----------------------|----------|------------|-----------|
| FLG     | cg13447818 | 2312   | 1  | TSS1500               | Open sea | -3.302E-01 | 2.696E-05 |
| FLG     | cg26390526 | 2312   | 1  | TSS1500               | Open sea | -3.520E-01 | 1.638E-03 |
| FLI1    | cg17872757 | 2313   | 11 | Gene body/5'UTR       | Island   | 4.657E-01  | 1.094E-03 |
| FLRT2   | cg17410236 | 23768  | 14 | 1stExon/5'UTR         | Island   | 4.519E-01  | 1.540E-05 |
| FLT1    | cg10501128 | 2321   | 13 | 1stExon/5'UTR         | Island   | 3.244E-01  | 5.569E-03 |
| FLT3    | cg07017374 | 2322   | 13 | Gene body             | Island   | 6.067E-01  | 3.150E-08 |
| FLT4    | cg00489401 | 2324   | 5  | Gene body             | Island   | 3.798E-01  | 1.433E-07 |
| FMO9P   | cg24272559 | 116123 | 1  | TSS1500               | Open sea | -3.046E-01 | 1.137E-05 |
| FOLR2   | cg11295113 | 2350   | 11 | 1stExon/5'UTR         | Open sea | -3.393E-01 | 3.182E-06 |
| FOXD3   | cg22815110 | 27022  | 1  | 1stExon               | Island   | 4.041E-01  | 1.224E-05 |
| FOXE1   | cg15802898 | 2304   | 9  | TSS1500               | N-Shore  | 4.013E-01  | 1.444E-04 |
| FOXE1   | cg19292008 | 2304   | 9  | 5'UTR/1stExon         | Island   | 4.056E-01  | 5.940E-05 |
| FOXG1   | cg10300684 | 2290   | 14 | 1stExon/5'UTR         | N-Shore  | 3.827E-01  | 1.291E-08 |
| FOXI2   | cg13929328 | 399823 | 10 | 1stExon               | Island   | 3.590E-01  | 6.853E-14 |
| FOXI2   | cg19884262 | 399823 | 10 | 1stExon               | Island   | 3.957E-01  | 3.997E-07 |
| FZD10   | cg23054883 | 11211  | 12 | 1stExon               | Island   | 3.785E-01  | 1.426E-04 |
| FZD2    | cg25228126 | 2535   | 17 | 1stExon               | Island   | 3.477E-01  | 5.107E-10 |
| GABBR2  | cg02058918 | 9568   | 9  | 1stExon               | Island   | 4.373E-01  | 3.453E-03 |
| GABRA5  | cg24387380 | 2558   | 15 | Gene body             | Open sea | -3.204E-01 | 8.461E-06 |
| GAL3ST3 | cg21238818 | 89792  | 11 | 5'UTR/1stExon         | Island   | 3.911E-01  | 6.642E-16 |
| GALR1   | cg00662556 | 2587   | 18 | Gene body             | Island   | 3.458E-01  | 8.536E-11 |
| GALR1   | cg04534765 | 2587   | 18 | 1stExon/5'UTR         | Island   | 4.929E-01  | 2.301E-12 |
| GALR1   | cg10486998 | 2587   | 18 | TSS1500               | Island   | 4.136E-01  | 7.765E-10 |
| GALR1   | cg15343119 | 2587   | 18 | TSS1500               | Island   | 3.752E-01  | 1.030E-07 |
| GALR1   | cg26721264 | 2587   | 18 | TSS1500               | Island   | 5.075E-01  | 1.374E-13 |
| GBGT1   | cg01169778 | 26301  | 9  | 5'UTR                 | Island   | 4.061E-01  | 3.708E-10 |
| GBX2    | cg06954481 | 2637   | 2  | 1stExon               | Island   | 3.917E-01  | 4.789E-02 |
| GCM1    | cg20967220 | 8521   | 6  | TSS200                | Open sea | -3.831E-01 | 2.030E-07 |
| GCM1    | cg26023389 | 8521   | 6  | 1stExon/5'UTR         | Open sea | -3.320E-01 | 7.099E-06 |
| GCM2    | cg02844545 | 9247   | 6  | 1stExon/5'UTR         | Island   | 3.663E-01  | 1.806E-09 |
| GDF10   | cg07773116 | 2662   | 10 | 1stExon               | Island   | 3.016E-01  | 4.733E-05 |
| GDNF    | cg07442479 | 2668   | 5  | 1stExon/5'UTR         | Island   | 4.106E-01  | 5.352E-06 |
| GFPT2   | cg21937886 | 9945   | 5  | Gene body             | Island   | 4.085E-01  | 2.406E-02 |
| GHSR    | cg11812218 | 2693   | 3  | TSS1500               | N-Shore  | 3.213E-01  | 1.552E-05 |
| GK2     | cg17738194 | 2712   | 4  | TSS200                | Open sea | -3.728E-01 | 1.466E-09 |
| GLB1L3  | cg19674669 | 112937 | 11 | Gene body             | Island   | 3.446E-01  | 1.241E-03 |
| GLRB    | cg09688546 | 2743   | 4  | 1stExon/TSS200/5'UTR  | Island   | 3.355E-01  | 8.382E-04 |
| GML     | cg00057593 | 2765   | 8  | 5'UTR                 | S-Shore  | -3.464E-01 | 1.882E-05 |
| GNA15   | cg26482939 | 2769   | 19 | Gene body             | Open sea | -4.114E-01 | 1.235E-09 |
| GNG4    | cg09649610 | 2786   | 1  | TSS1500/1stExon/5'UTR | Island   | 3.475E-01  | 3.816E-04 |
| GPATCH2 | cg01727899 | 55105  | 1  | TSS1500               | S-Shore  | -3.890E-01 | 7.670E-08 |
| GPR132  | cg26514492 | 29933  | 14 | TSS200                | Open sea | -3.196E-01 | 3.397E-11 |
| GPR25   | cg21870884 | 2848   | 1  | 1stExon               | Island   | 3.384E-01  | 5.050E-04 |
| GPR26   | cg02757432 | 2849   | 10 | 1stExon               | Island   | 4.000E-01  | 1.031E-12 |
| GPR27   | cg13562542 | 2850   | 3  | 1stExon               | Island   | 4.303E-01  | 4.020E-05 |
| GPR55   | cg20287234 | 9290   | 2  | 5'UTR                 | Open sea | -3.522E-01 | 1.575E-06 |
| GPR75   | cg14832904 | 10936  | 2  | 5'UTR/1stExon         | Island   | 3.669E-01  | 9.093E-14 |
| GPR75   | cg19664945 | 10936  | 2  | TSS1500               | S-Shore  | 3.839E-01  | 1.546E-12 |
| GPR97   | cg08368934 | 222487 | 16 | TSS1500               | Open sea | -3.230E-01 | 5.793E-07 |
| GPSM1   | cg14934821 | 26086  | 9  | Gene body             | Island   | -3.100E-01 | 1.964E-03 |
| GPX7    | cg16557944 | 2882   | 1  | 1stExon               | Island   | 4.211E-01  | 4.709E-03 |
| GRASP   | cg04034767 | 160622 | 12 | 1stExon               | Island   | 4.828E-01  | 2.984E-04 |
| GREB1   | cg10612997 | 9687   | 2  | TSS1500               | Open sea | -3.788E-01 | 4.071E-06 |
| GRIA2   | cg25148589 | 2891   | 4  | 1stExon/5'UTR         | N-Shore  | 3.513E-01  | 2.968E-06 |
| GRIA4   | cg09980522 | 2893   | 11 | Gene body/1stExon     | S-Shore  | 3.858E-01  | 1.385E-06 |
| GRIA4   | cg19343464 | 2893   | 11 | 5'UTR                 | S-Shore  | 3.940E-01  | 1.101E-08 |
| GRIK2   | cg26316946 | 2898   | 6  | 1stExon/5'UTR         | Island   | 4.023E-01  | 1.614E-06 |
| GRIK3   | cg06165395 | 2899   | 1  | TSS1500               | S-Shore  | 3.252E-01  | 4.051E-07 |
| GRIK3   | cg06722633 | 2899   | 1  | Gene body             | Island   | 4.304E-01  | 1.236E-14 |
| GRIN3A  | cg18794577 | 116443 | 9  | TSS200                | Island   | 4.379E-01  | 5.246E-03 |
| GRM6    | cg14859460 | 2916   | 5  | TSS200                | Island   | 3.735E-01  | 1.511E-07 |
| GRM6    | cg15674997 | 2916   | 5  | Gene body             | Island   | 3.071E-01  | 1.706E-10 |
| GRM8    | cg09868882 | 2918   | 7  | TSS200/5'UTR          | Open sea | -3.347E-01 | 9.573E-06 |

|           |             |        |    |               |          |            |           |
|-----------|-------------|--------|----|---------------|----------|------------|-----------|
| GSC2      | cg26599006  | 2928   | 22 | Gene body     | Island   | 4.468E-01  | 1.683E-06 |
| G SX1     | cg26609631  | 219409 | 13 | 5'UTR/1stExon | Island   | 3.564E-01  | 2.890E-04 |
| GUCY1A2   | cg23984434  | 2977   | 11 | 1stExon       | Island   | 4.726E-01  | 6.009E-05 |
| GUCY2C    | cg18754342  | 2984   | 12 | 1stExon       | Open sea | -4.243E-01 | 2.723E-06 |
| GZMH      | cg02150910  | 2999   | 14 | TSS1500       | Open sea | -3.400E-01 | 5.603E-07 |
| HAND2     | cg01580681  | 9464   | 4  | 1stExon       | N-Shore  | 3.741E-01  | 1.784E-08 |
| HAND2     | cg02774439  | 9464   | 4  | 5'UTR/1stExon | Island   | 3.172E-01  | 4.123E-04 |
| HAVCR2    | cg17484237  | 84868  | 5  | 5'UTR/1stExon | Open sea | -3.886E-01 | 1.705E-16 |
| HBB       | cg14544583  | 3043   | 11 | TSS1500       | Open sea | -3.953E-01 | 1.106E-06 |
| HBE1      | cg08970694  | 3046   | 11 | Gene body     | Open sea | -3.657E-01 | 8.433E-09 |
| HBQ1      | cg07703401  | 3049   | 16 | 1stExon/5'UTR | Island   | 3.937E-01  | 3.080E-04 |
| HCG9      | cg04623837  | 10255  | 6  | Gene body     | N-Shore  | 3.044E-01  | 4.528E-03 |
| HCG9      | cg23244913  | 10255  | 6  | Gene body     | N-Shore  | 3.583E-01  | 2.981E-04 |
| HCN1      | cg06498267  | 348980 | 5  | 1stExon       | Island   | 3.019E-01  | 7.066E-06 |
| HCN1      | cg11285003  | 348980 | 5  | TSS1500       | S-Shore  | 3.254E-01  | 1.834E-05 |
| HECW1     | cg17628717  | 23072  | 7  | Gene body     | Open sea | -3.070E-01 | 4.302E-04 |
| HHATL     | cg00407150  | 57467  | 3  | 5'UTR/TSS1500 | Open sea | -3.019E-01 | 2.670E-06 |
| HHIP      | cg14580567  | 64399  | 4  | 1stExon/5'UTR | Island   | 3.428E-01  | 1.380E-02 |
| HHIPL1    | cg06834875  | 84439  | 14 | TSS1500       | Island   | -3.051E-01 | 2.794E-06 |
| HIF3A     | cg07022477  | 64344  | 19 | TSS1500       | N-Shore  | -3.969E-01 | 6.376E-10 |
| HIST1H2BO | cg12629515  | 8348   | 6  | TSS1500       | N-Shore  | -4.130E-01 | 6.134E-14 |
| HIST1H3J  | cg12629515  | 8356   | 6  | TSS1500       | N-Shore  | -4.130E-01 | 6.134E-14 |
| HKR1      | cg12024906  | 284459 | 19 | 1stExon/5'UTR | Island   | 3.956E-01  | 3.744E-05 |
| HOXA4     | cg04317399  | 3201   | 7  | 1stExon       | Island   | 3.019E-01  | 1.638E-05 |
| HOXA9     | cg01381846  | 3205   | 7  | 1stExon       | Island   | 4.003E-01  | 7.600E-09 |
| HOXA9     | cg26521404  | 3205   | 7  | 1stExon       | Island   | 4.735E-01  | 3.884E-09 |
| HOXA9     | cg27009703  | 3205   | 7  | 1stExon       | Island   | 3.151E-01  | 1.980E-05 |
| HOXB4     | cg08089301  | 3214   | 17 | 1stExon       | Island   | 3.646E-01  | 2.026E-02 |
| HOXD1     | cg19001226  | 3231   | 2  | 1stExon/5'UTR | Island   | 3.942E-01  | 3.515E-03 |
| HOXD10    | cg21591742  | 3236   | 2  | TSS1500       | Island   | 3.217E-01  | 5.337E-06 |
| HOXD12    | cg23130254  | 3238   | 2  | 1stExon       | Island   | 3.507E-01  | 1.714E-08 |
| HOXD8     | cg15520279  | 3234   | 2  | 5'UTR/1stExon | Island   | 3.901E-01  | 1.483E-08 |
| HOXD9     | cg14991487  | 3235   | 2  | TSS200        | Island   | 4.757E-01  | 2.427E-09 |
| HS3ST2    | cg19064258  | 9956   | 16 | 1stExon       | Island   | 3.800E-01  | 3.746E-06 |
| HS3ST3A1  | cg07480567  | 9955   | 17 | 1stExon/5'UTR | Island   | 4.365E-01  | 9.130E-13 |
| HS3ST3A1  | cg18236079  | 9955   | 17 | TSS1500       | S-Shore  | 3.864E-01  | 2.064E-04 |
| HSPA2     | cg27120999  | 3306   | 14 | 1stExon       | Island   | 3.756E-01  | 4.643E-10 |
| HTR7      | cg06291867  | 3363   | 10 | 1stExon       | Island   | 3.280E-01  | 9.697E-04 |
| IAPP      | cg15583072  | 3375   | 12 | TSS200        | Open sea | -3.298E-01 | 2.468E-09 |
| ID4       | cg17252960  | 3400   | 6  | TSS1500       | N-Shore  | 3.683E-01  | 3.520E-04 |
| IDO2      | cg16957569  | 169355 | 8  | TSS1500       | Open sea | -3.326E-01 | 5.957E-07 |
| IFNA13    | cg017113938 | 3447   | 9  | TSS1500       | Open sea | -3.091E-01 | 4.113E-06 |
| IFNA8     | cg15669228  | 3445   | 9  | 1stExon       | Open sea | -3.002E-01 | 1.674E-06 |
| IGF2      | cg13791131  | 3481   | 11 | 5'UTR         | Island   | 4.364E-01  | 1.122E-07 |
| IGF2      | cg25163476  | 3481   | 11 | 5'UTR         | Island   | 3.772E-01  | 1.085E-05 |
| IGF2      | cg25574024  | 3481   | 11 | 5'UTR         | Island   | 4.651E-01  | 6.155E-08 |
| IGF2AS    | cg13791131  | 51214  | 11 | Gene body     | Island   | 4.364E-01  | 1.122E-07 |
| IGF2AS    | cg25163476  | 51214  | 11 | TSS200        | Island   | 3.772E-01  | 1.085E-05 |
| IGF2AS    | cg25574024  | 51214  | 11 | Gene body     | Island   | 4.651E-01  | 6.155E-08 |
| IGSF21    | cg23349790  | 84966  | 1  | 5'UTR/1stExon | Island   | 5.400E-01  | 2.820E-12 |
| IL1B      | cg07935264  | 3553   | 2  | TSS200        | Open sea | -4.535E-01 | 4.192E-18 |
| IL1F7     | cg10269439  | 27178  | 2  | 5'UTR/1stExon | Open sea | -3.208E-01 | 2.622E-06 |
| IL1R2     | cg17142183  | 7850   | 2  | TSS200        | Open sea | -3.411E-01 | 3.511E-04 |
| IL1R2     | cg20340242  | 7850   | 2  | 1stExon/5'UTR | Open sea | -3.206E-01 | 1.934E-14 |
| IL25      | cg14366598  | 64806  | 14 | TSS1500       | Open sea | -3.726E-01 | 2.477E-15 |
| IL2RA     | cg26105232  | 3559   | 10 | TSS1500       | Open sea | -3.728E-01 | 4.394E-12 |
| IL9       | cg24585690  | 3578   | 5  | 1stExon/5'UTR | Open sea | -3.017E-01 | 9.931E-06 |
| INS-IGF2  | cg13791131  | 723961 | 11 | Gene body     | Island   | 4.364E-01  | 1.122E-07 |
| INS-IGF2  | cg25163476  | 723961 | 11 | Gene body     | Island   | 3.772E-01  | 1.085E-05 |
| INS-IGF2  | cg25574024  | 723961 | 11 | Gene body     | Island   | 4.651E-01  | 6.155E-08 |
| IPCEF1    | cg19963522  | 26034  | 6  | 5'UTR         | Open sea | -3.380E-01 | 3.997E-05 |
| IPO5      | cg01679262  | 3843   | 13 | 5'UTR         | Open sea | -4.073E-01 | 5.203E-15 |
| IRF4      | cg12741420  | 3662   | 6  | 5'UTR         | Island   | 3.417E-01  | 2.863E-04 |

|                     |            |        |    |                 |          |            |           |
|---------------------|------------|--------|----|-----------------|----------|------------|-----------|
| <i>IRX4</i>         | cg00243313 | 50805  | 5  | TSS1500         | Island   | 3.697E-01  | 5.701E-04 |
| <i>IRX4</i>         | cg03963198 | 50805  | 5  | 5'UTR/1stExon   | Island   | 4.710E-01  | 3.615E-06 |
| <i>ITGA4</i>        | cg20415809 | 3676   | 2  | 5'UTR/1stExon   | Island   | 3.980E-01  | 2.318E-04 |
| <i>ITGA8</i>        | cg16902509 | 8516   | 10 | Gene body       | N-Shore  | 3.458E-01  | 1.591E-06 |
| <i>ITGA9</i>        | cg25870420 | 3680   | 3  | 1stExon         | Island   | 4.166E-01  | 1.582E-03 |
| <i>IVL</i>          | cg25082710 | 3713   | 1  | TSS1500         | Open sea | -4.187E-01 | 7.387E-17 |
| <i>JAM2</i>         | cg11344614 | 58494  | 21 | TSS1500         | N-Shore  | -3.188E-01 | 2.451E-05 |
| <i>KANK4</i>        | cg00625425 | 163782 | 1  | TSS1500         | S-Shore  | -3.302E-01 | 4.813E-06 |
| <i>KARS</i>         | cg08585897 | 3735   | 16 | 5'UTR/Gene body | N-Shore  | -3.438E-01 | 1.959E-06 |
| <i>KCNA5</i>        | cg20792062 | 3741   | 12 | 5'UTR/1stExon   | Island   | 3.019E-01  | 6.182E-10 |
| <i>KCNA6</i>        | cg26162582 | 3742   | 12 | 5'UTR/1stExon   | Island   | 4.232E-01  | 8.760E-06 |
| <i>KCNB1</i>        | cg24507762 | 3745   | 20 | TSS1500         | N-Shore  | 3.331E-01  | 5.601E-08 |
| <i>KCNB2</i>        | cg20890210 | 9312   | 8  | 5'UTR           | S-Shore  | 3.102E-01  | 1.925E-03 |
| <i>KCNG1</i>        | cg24924779 | 3755   | 20 | TSS1500         | Island   | 4.195E-01  | 1.205E-04 |
| <i>KCNH5</i>        | cg06501084 | 27133  | 14 | 5'UTR           | Open sea | -3.095E-01 | 9.653E-06 |
| <i>KCNJ1</i>        | cg05193832 | 3758   | 11 | 5'UTR           | Open sea | -3.159E-01 | 1.509E-03 |
| <i>KCNJ8</i>        | cg01226811 | 3764   | 12 | 5'UTR/1stExon   | Open sea | 3.181E-01  | 2.258E-03 |
| <i>KCNK16</i>       | cg02611419 | 83795  | 6  | 3'UTR           | S-Shore  | -3.486E-01 | 1.085E-08 |
| <i>KCNK17</i>       | cg02611419 | 89822  | 6  | TSS1500         | S-Shore  | -3.486E-01 | 1.085E-08 |
| <i>KCNK18</i>       | cg25229305 | 338567 | 10 | TSS1500         | Open sea | -3.298E-01 | 2.062E-08 |
| <i>KCNK9</i>        | cg17834752 | 51305  | 8  | 5'UTR/1stExon   | Island   | 3.670E-01  | 1.717E-07 |
| <i>KCNN2</i>        | cg27403635 | 3781   | 5  | 1stExon/5'UTR   | Island   | 3.315E-01  | 1.112E-02 |
| <i>KCNN4</i>        | cg04833845 | 3783   | 19 | TSS1500         | Open sea | -3.483E-01 | 2.591E-09 |
| <i>KCNQ1DN</i>      | cg01530101 | 55539  | 11 | TSS200          | Island   | 3.298E-01  | 6.527E-09 |
| <i>KCNQ2</i>        | cg08003150 | 3785   | 20 | 1stExon         | Island   | 3.512E-01  | 4.141E-02 |
| <i>KCNQ3</i>        | cg18153124 | 3786   | 8  | TSS200          | Island   | 3.443E-01  | 1.504E-02 |
| <i>KCNQ3</i>        | cg27016990 | 3786   | 8  | 1stExon         | Island   | 5.337E-01  | 5.436E-05 |
| <i>KCNQ5</i>        | cg24687051 | 56479  | 6  | 1stExon         | Island   | 5.000E-01  | 4.858E-04 |
| <i>KCNV1</i>        | cg05860890 | 27012  | 8  | 5'UTR/1stExon   | Island   | 3.276E-01  | 2.015E-03 |
| <i>KCTD1</i>        | cg26755793 | 284252 | 18 | TSS1500         | Open sea | -3.385E-01 | 2.481E-07 |
| <i>KCTD8</i>        | cg12300353 | 386617 | 4  | 1stExon         | Island   | 3.831E-01  | 8.629E-04 |
| <i>KDR</i>          | cg14323109 | 3791   | 4  | TSS200          | Island   | 3.149E-01  | 5.169E-03 |
| <i>KHDRBS2</i>      | cg18239753 | 202559 | 6  | 1stExon/5'UTR   | Island   | 3.728E-01  | 1.505E-09 |
| <i>KIAA1026</i>     | cg17657618 | NA     | 1  | Gene body       | Open sea | -3.330E-01 | 3.244E-13 |
| <i>KIAA1191</i>     | cg26620356 | 57179  | 5  | TSS1500         | S-Shore  | -3.504E-01 | 2.578E-13 |
| <i>KLRG1</i>        | cg00443307 | 10219  | 12 | TSS1500         | Open sea | -3.131E-01 | 3.415E-05 |
| <i>KRT1</i>         | cg17405586 | 3848   | 12 | TSS200          | Open sea | -4.414E-01 | 9.114E-10 |
| <i>KRT85</i>        | cg21518208 | 3891   | 12 | TSS200          | S-Shore  | -4.173E-01 | 5.633E-08 |
| <i>KRTAP11-1</i>    | cg07014174 | 337880 | 21 | 1stExon         | Open sea | -3.020E-01 | 5.376E-09 |
| <i>KRTAP11-1</i>    | cg22643217 | 337880 | 21 | TSS200          | Open sea | -3.601E-01 | 2.592E-07 |
| <i>KRTAP15-1</i>    | cg15606663 | 254950 | 21 | TSS200          | Open sea | -3.333E-01 | 1.360E-08 |
| <i>KRTAP26-1</i>    | cg18822544 | 388818 | 21 | 5'UTR/1stExon   | Open sea | -3.505E-01 | 6.587E-11 |
| <i>KRTDAP</i>       | cg10305797 | 388533 | 19 | TSS1500         | Open sea | -3.989E-01 | 1.393E-04 |
| <i>LACRT</i>        | cg07643942 | 90070  | 12 | TSS1500         | Open sea | -4.611E-01 | 4.594E-10 |
| <i>LAMA1</i>        | cg07846220 | 284217 | 18 | 1stExon         | Island   | 5.128E-01  | 2.584E-14 |
| <i>LAMC2</i>        | cg00208830 | 3918   | 1  | TSS1500         | Open sea | -3.016E-01 | 1.552E-05 |
| <i>LAT2</i>         | cg03375002 | 7462   | 7  | TSS1500         | Open sea | -4.006E-01 | 2.744E-13 |
| <i>LCE1F</i>        | cg23413307 | 353137 | 1  | TSS1500         | Open sea | -3.388E-01 | 2.020E-05 |
| <i>LCE2D</i>        | cg21312148 | 353141 | 1  | 5'UTR           | Open sea | -3.387E-01 | 9.827E-06 |
| <i>LCE3D</i>        | cg20676475 | 84648  | 1  | 5'UTR           | Open sea | -3.491E-01 | 1.766E-05 |
| <i>LEP</i>          | cg12782180 | 3952   | 7  | TSS1500         | Island   | 3.007E-01  | 1.025E-11 |
| <i>LEP</i>          | cg19594666 | 3952   | 7  | TSS200          | Island   | 3.556E-01  | 1.198E-12 |
| <i>LHX1</i>         | cg22660578 | 3975   | 17 | TSS1500         | Island   | 3.504E-01  | 1.633E-02 |
| <i>LILRA2</i>       | cg19486673 | 11027  | 19 | TSS1500         | Open sea | -3.175E-01 | 7.775E-07 |
| <i>LIN7A</i>        | cg05647859 | 8825   | 12 | TSS200          | S-Shore  | 3.707E-01  | 1.204E-02 |
| <i>LOC100192379</i> | cg05396987 | NA     | 4  | Gene body       | Island   | 3.461E-01  | 6.683E-08 |
| <i>LOC100302652</i> | cg14832904 | NA     | 2  | 1stExon         | Island   | 3.669E-01  | 9.093E-14 |
| <i>LOC100302652</i> | cg19664945 | NA     | 2  | TSS200          | S-Shore  | 3.839E-01  | 1.546E-12 |
| <i>LOC283392</i>    | cg13663218 | NA     | 12 | Gene body       | Island   | 3.380E-01  | 3.360E-05 |
| <i>LOC284805</i>    | cg26331247 | NA     | 20 | Gene body       | Open sea | -3.561E-01 | 1.441E-11 |
| <i>LOC285696</i>    | cg23496260 | NA     | 5  | TSS1500         | Island   | 3.945E-01  | 1.061E-04 |
| <i>LOC285780</i>    | cg17774418 | NA     | 6  | Gene body       | Open sea | -3.193E-01 | 3.349E-05 |
| <i>LOC285780</i>    | cg20162076 | NA     | 6  | Gene body       | Open sea | -3.017E-01 | 1.505E-06 |

|           |            |        |    |                         |          |            |           |
|-----------|------------|--------|----|-------------------------|----------|------------|-----------|
| LOC286002 | cg14646244 | NA     | 7  | Gene body               | N-Shore  | -3.829E-01 | 6.582E-14 |
| LOC404266 | cg16495265 | NA     | 17 | Gene body               | Island   | 3.058E-01  | 3.141E-03 |
| LPAR3     | cg06501070 | 23566  | 1  | 5'UTR                   | Open sea | -3.771E-01 | 5.188E-06 |
| LPL       | cg08918749 | 4023   | 8  | Gene body               | Island   | 3.278E-01  | 4.156E-02 |
| LRFN5     | cg04784672 | 145581 | 14 | 5'UTR/1stExon           | S-Shore  | 3.298E-01  | 1.705E-03 |
| LRRC4     | cg15087147 | 64101  | 7  | TSS1500                 | Island   | 3.349E-01  | 2.359E-03 |
| LRTOMT    | cg23256971 | 220074 | 11 | 5'UTR                   | S-Shore  | 3.568E-01  | 6.275E-33 |
| LTA       | cg10995925 | 4049   | 6  | TSS1500                 | Open sea | -3.011E-01 | 5.459E-06 |
| LUC7L     | cg07080946 | 55692  | 16 | TSS1500                 | N-Shore  | -3.249E-01 | 6.290E-04 |
| LVRN      | cg25044651 | 206338 | 5  | 1stExon                 | Island   | 3.847E-01  | 8.630E-12 |
| LY86      | cg17774418 | 9450   | 6  | Gene body               | Open sea | -3.193E-01 | 3.349E-05 |
| LY86      | cg20162076 | 9450   | 6  | TSS1500                 | Open sea | -3.017E-01 | 1.505E-06 |
| LY9       | cg01367992 | 4063   | 1  | Gene body               | Open sea | -3.299E-01 | 1.808E-05 |
| MAEL      | cg18894878 | 84944  | 1  | TSS1500                 | Island   | -4.010E-01 | 1.349E-05 |
| MAFB      | cg02497758 | 9935   | 20 | 1stExon                 | Island   | 4.298E-01  | 9.385E-07 |
| MCHR2     | cg20134215 | 84539  | 6  | 5'UTR                   | Island   | 3.515E-01  | 2.650E-05 |
| MED21     | cg01982833 | 9412   | 12 | TSS1500                 | N-Shore  | -3.089E-01 | 5.973E-10 |
| MGAT5B    | cg00654814 | 146664 | 17 | 1stExon/5'UTR           | Island   | 3.753E-01  | 9.906E-04 |
| MGMT      | cg07638938 | 4255   | 10 | Gene body               | Open sea | 3.994E-01  | 2.804E-15 |
| MGST1     | cg11203041 | 4257   | 12 | TSS1500/5'UTR           | Open sea | -3.830E-01 | 3.453E-09 |
| MIR34B    | cg01192900 | 407041 | 11 | Gene body               | Island   | 3.252E-01  | 3.803E-02 |
| MIR34B    | cg22879515 | 407041 | 11 | TSS200                  | Island   | 4.080E-01  | 3.958E-02 |
| MIR34B    | cg23211240 | 407041 | 11 | TSS200                  | Island   | 3.406E-01  | 1.056E-03 |
| MIR34C    | cg01192900 | 407042 | 11 | TSS1500                 | Island   | 3.252E-01  | 3.803E-02 |
| MIR34C    | cg22879515 | 407042 | 11 | TSS1500                 | Island   | 4.080E-01  | 3.958E-02 |
| MIR34C    | cg23211240 | 407042 | 11 | TSS1500                 | Island   | 3.406E-01  | 1.056E-03 |
| MKX       | cg14614211 | 283078 | 10 | 5'UTR                   | Island   | 3.044E-01  | 1.626E-08 |
| MLC1      | cg05861567 | 23209  | 22 | 5'UTR/1stExon           | Open sea | -3.065E-01 | 1.077E-09 |
| MLNR      | cg02620013 | 2862   | 13 | 1stExon                 | Island   | 3.721E-01  | 9.366E-07 |
| MMP13     | cg22658979 | 4322   | 11 | TSS200                  | Open sea | -3.518E-01 | 2.449E-04 |
| MMP26     | cg12493906 | 56547  | 11 | TSS200                  | Open sea | -3.456E-01 | 6.803E-06 |
| MMRN1     | cg21092324 | 22915  | 4  | 1stExon                 | Open sea | -3.801E-01 | 1.120E-10 |
| MNDA      | cg25119415 | 4332   | 1  | TSS1500                 | Open sea | -3.300E-01 | 3.961E-05 |
| MOBP      | cg16729794 | 4336   | 3  | 5'UTR/1stExon/Gene body | Open sea | -3.039E-01 | 5.569E-05 |
| MORF4L1   | cg14426682 | 10933  | 15 | TSS1500                 | N-Shore  | -3.350E-01 | 8.117E-03 |
| MOS       | cg22411207 | 4342   | 8  | 1stExon                 | Island   | 3.055E-01  | 6.188E-07 |
| MRGPRX1   | cg23001457 | 259249 | 11 | 1stExon                 | Open sea | -3.626E-01 | 2.496E-06 |
| MS4A1     | cg06806711 | 931    | 11 | 1stExon/5'UTR           | Open sea | -3.567E-01 | 1.277E-04 |
| MSC       | cg06269753 | 9242   | 8  | Gene body               | Island   | 3.484E-01  | 6.856E-06 |
| MSC       | cg23710218 | 9242   | 8  | 1stExon/5'UTR           | Island   | 4.404E-01  | 4.329E-13 |
| MSH3      | cg08244028 | 4437   | 5  | TSS1500                 | N-Shore  | -3.068E-01 | 4.406E-06 |
| MSH3      | cg10180697 | 4437   | 5  | TSS1500                 | N-Shore  | -3.061E-01 | 2.337E-06 |
| MSR1      | cg16303562 | 4481   | 8  | TSS200                  | Open sea | -3.191E-01 | 4.438E-06 |
| MSX1      | cg09748975 | 4487   | 4  | Gene body               | Island   | 3.681E-01  | 6.193E-10 |
| MTNR1B    | cg15842276 | 4544   | 11 | TSS200                  | N-Shore  | 3.020E-01  | 5.063E-05 |
| MUC13     | cg09081544 | 56667  | 3  | Gene body               | Open sea | -3.079E-01 | 1.326E-03 |
| MUCL1     | cg27160701 | 118430 | 12 | Gene body               | Open sea | -3.037E-01 | 6.326E-04 |
| MYBPH     | cg18959422 | 4608   | 1  | TSS1500                 | Open sea | -3.692E-01 | 1.806E-09 |
| MYCBP     | cg12792157 | 26292  | 1  | 5'UTR/1stExon           | Island   | -4.189E-01 | 1.735E-23 |
| MYCT1     | cg02830467 | 80177  | 6  | TSS1500                 | Open sea | -3.299E-01 | 2.592E-06 |
| MYEOV     | cg24776407 | 26579  | 11 | 5'UTR/1stExon           | Open sea | -3.749E-01 | 9.829E-06 |
| MYO3A     | cg08441170 | 53904  | 10 | 1stExon/5'UTR           | Island   | 4.164E-01  | 7.614E-07 |
| MYO3A     | cg23771603 | 53904  | 10 | 5'UTR                   | Island   | 4.842E-01  | 1.151E-13 |
| MYOD1     | cg18555440 | 4654   | 11 | 1stExon                 | Island   | 3.279E-01  | 1.546E-10 |
| MYT1      | cg16772207 | 4661   | 20 | TSS200                  | Open sea | -3.244E-01 | 1.242E-03 |
| NALCN     | cg15202954 | 259232 | 13 | TSS200                  | Island   | 4.215E-01  | 5.933E-06 |
| NAPSA     | cg27285056 | 9476   | 19 | 5'UTR/1stExon           | Open sea | -3.447E-01 | 8.762E-08 |
| NAT2      | cg12639234 | 10     | 8  | 5'UTR                   | S-Shelf  | -3.091E-01 | 2.532E-06 |
| NAT8L     | cg21269934 | 339983 | 4  | TSS1500                 | Island   | 3.095E-01  | 1.199E-02 |
| NAV1      | cg25167447 | 89796  | 1  | TSS1500                 | Island   | 3.332E-01  | 2.269E-05 |
| NBLA00301 | cg02774439 | 79804  | 4  | TSS1500                 | Island   | 3.172E-01  | 4.123E-04 |
| NBR2      | cg06973652 | 10230  | 17 | Gene body               | S-Shore  | -3.531E-01 | 2.522E-02 |
| NCAN      | cg06952310 | 1463   | 19 | Gene body               | Open sea | -3.290E-01 | 7.723E-07 |

|            |            |        |    |                   |          |            |           |
|------------|------------|--------|----|-------------------|----------|------------|-----------|
| NCAPH      | cg01906055 | 23397  | 2  | TSS1500           | N-Shore  | -3.882E-01 | 1.259E-15 |
| NCRNA00112 | cg10198932 | 54089  | 21 | TSS1500           | Open sea | -3.059E-01 | 5.161E-09 |
| NEFM       | cg23290344 | 4741   | 8  | TSS1500/1stExon   | Island   | 4.251E-01  | 2.051E-10 |
| NETO1      | cg26186727 | 81832  | 18 | 1stExon/5'UTR     | Island   | 3.547E-01  | 2.657E-11 |
| NEUROG1    | cg04330449 | 4762   | 5  | 1stExon           | Island   | 4.349E-01  | 2.293E-12 |
| NEUROG1    | cg04897683 | 4762   | 5  | 5'UTR/1stExon     | Island   | 3.975E-01  | 1.295E-06 |
| NEUROG1    | cg11248413 | 4762   | 5  | TSS200            | Island   | 3.139E-01  | 3.989E-02 |
| NEUROG1    | cg14958635 | 4762   | 5  | 1stExon           | Island   | 3.082E-01  | 3.818E-06 |
| NHLH2      | cg22427279 | 4808   | 1  | TSS1500           | S-Shelf  | -3.494E-01 | 9.041E-10 |
| NID2       | cg01231779 | 22795  | 14 | 5'UTR/1stExon     | Island   | 3.885E-01  | 1.609E-02 |
| NID2       | cg22881914 | 22795  | 14 | TSS1500           | Island   | 3.897E-01  | 1.572E-02 |
| NIPSNAP1   | cg13797031 | 8508   | 22 | TSS1500           | S-Shore  | -4.441E-01 | 3.546E-07 |
| NKAIN2     | cg21787291 | 154215 | 6  | 5'UTR/1stExon     | Island   | 3.879E-01  | 2.754E-02 |
| NKX6-2     | cg08441806 | 84504  | 10 | 1stExon           | Island   | 3.371E-01  | 4.210E-07 |
| NLRP10     | cg18484189 | 338322 | 11 | 1stExon           | Open sea | -3.375E-01 | 7.522E-07 |
| NLRP12     | cg25866075 | 91662  | 19 | TSS200            | Open sea | -3.239E-01 | 2.432E-07 |
| NOL4       | cg06722216 | 8715   | 18 | 1stExon           | Island   | 3.352E-01  | 9.732E-03 |
| NOS1       | cg03538436 | 4842   | 12 | 5'UTR/1stExon     | Island   | 4.183E-01  | 2.266E-06 |
| NPR2       | cg12876594 | 4882   | 9  | TSS1500           | Island   | 3.636E-01  | 5.074E-08 |
| NPR2       | cg24194775 | 4882   | 9  | TSS1500           | N-Shore  | 4.247E-01  | 3.181E-07 |
| NPR3       | cg05839235 | 4883   | 5  | 1stExon           | Island   | 3.240E-01  | 1.127E-07 |
| NPTX2      | cg00548268 | 4885   | 7  | TSS1500           | Island   | 3.771E-01  | 2.753E-15 |
| NPY        | cg12614105 | 4852   | 7  | 5'UTR             | Island   | 3.172E-01  | 1.598E-04 |
| NPY5R      | cg18438777 | 4889   | 4  | 5'UTR             | Island   | 4.220E-01  | 5.497E-06 |
| NR1I3      | cg06277277 | 9970   | 1  | TSS1500           | Open sea | -3.027E-01 | 3.401E-05 |
| NR5A2      | cg20406878 | 2494   | 1  | TSS1500           | Open sea | -3.135E-01 | 3.995E-08 |
| NRG1       | cg17457560 | 3084   | 8  | 1stExon/5'UTR     | Island   | 4.638E-01  | 1.534E-06 |
| NTM        | cg11965370 | 50863  | 11 | 1stExon/5'UTR     | Island   | 3.035E-01  | 1.808E-05 |
| NTM        | cg20881910 | 50863  | 11 | TSS1500           | Island   | 4.647E-01  | 1.665E-12 |
| NTRK3      | cg14384532 | 4916   | 15 | TSS1500           | Island   | 3.848E-01  | 1.756E-12 |
| NUDT15     | cg11473104 | 55270  | 13 | TSS200            | N-Shore  | 3.083E-01  | 3.552E-11 |
| OLAH       | cg04001802 | 55301  | 10 | TSS1500           | Open sea | -3.453E-01 | 1.786E-06 |
| OLFM4      | cg12582008 | 10562  | 13 | Gene body         | Open sea | -3.301E-01 | 1.762E-04 |
| OPRK1      | cg25990647 | 4986   | 8  | 5'UTR/1stExon     | Island   | 4.690E-01  | 6.831E-06 |
| OR10J1     | cg15700197 | 26476  | 1  | TSS1500           | Open sea | -3.692E-01 | 5.527E-11 |
| OR12D2     | cg21414251 | 26529  | 6  | 1stExon           | Open sea | -3.017E-01 | 1.019E-07 |
| OR12D3     | cg20856834 | 81797  | 6  | 1stExon           | Open sea | -3.202E-01 | 8.590E-06 |
| OR1A1      | cg25607161 | 8383   | 17 | TSS1500           | Open sea | -3.153E-01 | 8.861E-07 |
| OR2L13     | cg20507276 | 284521 | 1  | 1stExon/5'UTR     | Island   | 3.181E-01  | 6.247E-10 |
| OR51B4     | cg06353345 | 79339  | 11 | 1stExon           | Open sea | -4.211E-01 | 2.493E-10 |
| OSTN       | cg03192737 | 344901 | 3  | Gene body         | Open sea | -3.267E-01 | 3.498E-05 |
| PAX3       | cg02245378 | 5077   | 2  | Gene body         | Island   | 3.080E-01  | 3.132E-06 |
| PAX3       | cg25596297 | 5077   | 2  | Gene body         | N-Shore  | 3.758E-01  | 4.910E-04 |
| PAX7       | cg07536847 | 5081   | 1  | TSS1500           | Island   | 3.842E-01  | 9.462E-08 |
| PAX7       | cg11428724 | 5081   | 1  | 5'UTR/1stExon     | Island   | 3.991E-01  | 2.548E-03 |
| PCDHA7     | cg12629325 | 56141  | 5  | Gene body         | Island   | 4.887E-01  | 3.179E-05 |
| PCDHAC1    | cg12629325 | 56135  | 5  | 1stExon/5'UTR     | Island   | 4.887E-01  | 3.179E-05 |
| PDE10A     | cg24133115 | 10846  | 6  | 5'UTR/1stExon     | Island   | 3.812E-01  | 3.069E-04 |
| PDE4B      | cg26963271 | 5142   | 1  | 5'UTR             | S-Shore  | 3.827E-01  | 1.302E-06 |
| PDGFD      | cg07748540 | 80310  | 11 | 1stExon           | Island   | 3.412E-01  | 4.673E-02 |
| PENK       | cg04598121 | 5179   | 8  | Gene body/1stExon | Island   | 3.455E-01  | 4.047E-13 |
| PEX5L      | cg21176048 | 51555  | 3  | TSS1500           | Island   | 3.102E-01  | 2.439E-03 |
| PHACTR3    | cg20357628 | 116154 | 20 | 5'UTR/1stExon     | Island   | 4.659E-01  | 3.449E-05 |
| PHF21B     | cg01775414 | 112885 | 22 | 1stExon/Gene body | Island   | 3.634E-01  | 3.030E-02 |
| PHOX2A     | cg18722841 | 401    | 11 | 1stExon           | Island   | 3.540E-01  | 3.156E-08 |
| PIPOX      | cg06144905 | 51268  | 17 | TSS200            | Open sea | -3.383E-01 | 5.542E-07 |
| PKDREJ     | cg11377136 | 10343  | 22 | 1stExon           | Island   | 4.839E-01  | 2.753E-09 |
| PKIA       | cg27140220 | 5569   | 8  | 1stExon/5'UTR     | Island   | 3.225E-01  | 2.096E-04 |
| PKP2       | cg03302287 | 5318   | 12 | 1stExon           | Island   | -3.234E-01 | 2.674E-10 |
| PLCL1      | cg02833180 | 5334   | 2  | Gene body         | Open sea | -3.020E-01 | 8.057E-03 |
| PLD5       | cg01664666 | 200150 | 1  | 5'UTR             | Island   | 3.771E-01  | 7.076E-05 |
| PLD5       | cg12613383 | 200150 | 1  | TSS1500           | Island   | 3.207E-01  | 1.718E-03 |
| PLEKHF1    | cg05512099 | 79156  | 19 | TSS1500           | N-Shore  | -4.496E-01 | 1.427E-12 |

|          |            |        |    |                       |          |            |           |
|----------|------------|--------|----|-----------------------|----------|------------|-----------|
| PLSCR4   | cg24315815 | 57088  | 3  | TSS1500               | S-Shore  | 3.405E-01  | 8.788E-10 |
| PLXDC2   | cg12563178 | 84898  | 10 | 1stExon/5'UTR         | Island   | 3.934E-01  | 7.062E-05 |
| PLXDC2   | cg13149307 | 84898  | 10 | TSS1500               | Island   | 3.451E-01  | 1.721E-03 |
| PMCHL2   | cg16794882 | 5370   | 5  | TSS1500               | Open sea | -3.015E-01 | 1.143E-04 |
| PNMAL1   | cg17296166 | 55228  | 19 | 5'UTR                 | Island   | 4.042E-01  | 2.047E-03 |
| PNOC     | cg19391527 | 5368   | 8  | TSS1500               | Open sea | -3.085E-01 | 1.988E-07 |
| POU3F3   | cg20291049 | 5455   | 2  | 1stExon               | Island   | 3.968E-01  | 1.019E-10 |
| POU4F1   | cg08097882 | 5457   | 13 | 5'UTR/1stExon         | Island   | 4.232E-01  | 5.633E-04 |
| POU4F2   | cg13262687 | 5458   | 4  | TSS1500               | Island   | 3.149E-01  | 3.786E-07 |
| POU4F2   | cg24199834 | 5458   | 4  | 1stExon/5'UTR         | Island   | 4.168E-01  | 1.152E-08 |
| PPM1M    | cg02417408 | 132160 | 3  | 5'UTR                 | S-Shore  | -3.085E-01 | 3.142E-07 |
| PPP1R14D | cg23382741 | 54866  | 15 | TSS1500               | Open sea | -3.153E-01 | 1.881E-05 |
| PRAC     | cg12374721 | 84366  | 17 | Gene body             | N-Shore  | 4.794E-01  | 2.764E-10 |
| PRAMEF2  | cg18807515 | 65122  | 1  | TSS1500               | Open sea | -3.079E-01 | 7.326E-04 |
| PRDM14   | cg01295203 | 63978  | 8  | TSS1500               | Island   | 3.868E-01  | 4.779E-09 |
| PRG2     | cg15357945 | 5553   | 11 | TSS1500               | Open sea | -3.281E-01 | 2.351E-13 |
| PRKAR1B  | cg13577076 | 5575   | 7  | 5'UTR/TSS1500         | S-Shore  | 4.242E-01  | 1.682E-04 |
| PRKCB    | cg05436658 | 5579   | 16 | 1stExon               | Island   | 3.933E-01  | 1.532E-06 |
| PRLHR    | cg15748507 | 2834   | 10 | Gene body             | Island   | 3.206E-01  | 2.069E-12 |
| PRODH2   | cg27039606 | 58510  | 19 | TSS1500               | Open sea | -3.029E-01 | 1.661E-05 |
| PSMB8    | cg16890093 | 5696   | 6  | TSS1500               | S-Shore  | -3.305E-01 | 1.476E-08 |
| PSMB9    | cg03465320 | 5698   | 6  | Gene body             | S-Shore  | -3.112E-01 | 2.348E-09 |
| PSME2    | cg05874478 | 5721   | 14 | 1stExon               | N-Shore  | -3.230E-01 | 1.491E-18 |
| PTF1A    | cg11438428 | 256297 | 10 | 1stExon               | Island   | 3.947E-01  | 1.599E-06 |
| PTGDR    | cg09516965 | 5729   | 14 | 1stExon/5'UTR         | Island   | 4.248E-01  | 2.443E-02 |
| PTH      | cg24816298 | 5741   | 11 | TSS1500               | Open sea | -3.250E-01 | 2.514E-05 |
| PTH2R    | cg25057743 | 5746   | 2  | TSS200                | Island   | 4.090E-01  | 2.541E-10 |
| PTP4A3   | cg18675600 | 11156  | 8  | 5'UTR/1stExon         | S-Shelf  | -3.477E-01 | 2.100E-03 |
| PTPRM    | cg01946574 | 5797   | 18 | Gene body             | Island   | 4.012E-01  | 4.991E-05 |
| PTPRO    | cg10646402 | 5800   | 12 | 1stExon/5'UTR         | Island   | 3.313E-01  | 4.545E-02 |
| PTPRO    | cg11843304 | 5800   | 12 | Gene body             | Open sea | -3.219E-01 | 3.244E-05 |
| PTPRS    | cg00614413 | 5802   | 19 | 5'UTR                 | N-Shelf  | -3.305E-01 | 4.162E-09 |
| PTPRT    | cg13168820 | 11122  | 20 | 1stExon               | Island   | 4.456E-01  | 6.558E-09 |
| PXDN     | cg12164282 | 7837   | 2  | 1stExon               | Island   | 5.002E-01  | 3.370E-16 |
| PXDN     | cg14037665 | 7837   | 2  | TSS1500               | Island   | 4.155E-01  | 5.871E-06 |
| PYCARD   | cg12100791 | 29108  | 16 | TSS200                | S-Shore  | -3.569E-01 | 9.262E-10 |
| QRFPR    | cg00015770 | 84109  | 4  | 1stExon/5'UTR         | Island   | 3.706E-01  | 5.113E-06 |
| RAB32    | cg18987220 | 10981  | 6  | TSS1500               | N-Shore  | -3.148E-01 | 4.184E-03 |
| RALGDS   | cg16872071 | 5900   | 9  | Gene body/TSS1500     | S-Shore  | -3.083E-01 | 1.290E-09 |
| RASGRF1  | cg15156078 | 5923   | 15 | TSS200                | Island   | 3.304E-01  | 3.110E-03 |
| RASGRF2  | cg09952204 | 5924   | 5  | 1stExon               | Island   | 3.451E-01  | 1.968E-02 |
| RBM24    | cg07346310 | 221662 | 6  | 1stExon/TSS1500/5'UTR | S-Shore  | 3.375E-01  | 4.165E-03 |
| RELN     | cg17923358 | 5649   | 7  | 1stExon               | Island   | 4.108E-01  | 1.522E-07 |
| RGS17    | cg24317255 | 26575  | 6  | 5'UTR                 | Island   | 3.538E-01  | 4.047E-03 |
| RGS6     | cg03188118 | 9628   | 14 | 5'UTR/1stExon         | S-Shore  | 3.410E-01  | 1.100E-06 |
| RHO      | cg13180098 | 6010   | 3  | TSS1500               | Open sea | -3.235E-01 | 1.084E-06 |
| RIC3     | cg08383315 | 79608  | 11 | 1stExon/5'UTR         | Island   | 3.637E-01  | 4.336E-04 |
| RIMBP2   | cg24272907 | 23504  | 12 | TSS1500               | Open sea | -3.515E-01 | 1.987E-05 |
| RLN3     | cg00722300 | 117579 | 19 | TSS1500               | N-Shelf  | -3.205E-01 | 2.387E-07 |
| RNASL    | cg26532905 | 6041   | 1  | TSS1500               | Open sea | -3.154E-01 | 8.854E-09 |
| RNF207   | cg00030047 | 388591 | 1  | Gene body             | N-Shore  | 3.681E-01  | 6.578E-09 |
| RNF217   | cg24298280 | 154214 | 6  | 5'UTR                 | Open sea | -3.409E-01 | 7.278E-04 |
| RNF31    | cg05874478 | 55072  | 14 | TSS1500               | N-Shore  | -3.230E-01 | 1.491E-18 |
| RPL36    | cg25136310 | 25873  | 19 | 1stExon/Gene body     | Island   | -3.136E-01 | 3.675E-35 |
| RRM2     | cg18623836 | 6241   | 2  | TSS1500               | N-Shore  | -3.056E-01 | 1.105E-09 |
| RSP02    | cg14070647 | 340419 | 8  | 5'UTR                 | Island   | 3.478E-01  | 4.666E-07 |
| RUNX3    | cg03171924 | 864    | 1  | Gene body             | Island   | 3.629E-01  | 7.698E-10 |
| RUNX3    | cg24019564 | 864    | 1  | TSS1500/Gene body     | Island   | 3.678E-01  | 3.552E-05 |
| RYSR2    | cg11657808 | 6262   | 1  | Gene body             | Island   | 5.625E-01  | 6.921E-12 |
| S100A8   | cg20070090 | 6279   | 1  | 5'UTR                 | Open sea | -4.083E-01 | 6.124E-09 |
| S100A8   | cg24898863 | 6279   | 1  | TSS200                | Open sea | -3.407E-01 | 3.841E-10 |
| SALL1    | cg22674717 | 6299   | 16 | TSS1500               | Island   | 4.484E-01  | 3.074E-09 |
| SALL3    | cg15191648 | 27164  | 18 | TSS200                | Island   | 3.940E-01  | 1.637E-14 |

|                   |            |           |    |                         |          |            |           |
|-------------------|------------|-----------|----|-------------------------|----------|------------|-----------|
| <i>SARM1</i>      | cg23887396 | 23098     | 17 | Gene body               | Island   | 3.231E-01  | 2.198E-02 |
| <i>SCARF2</i>     | cg14785479 | 91179     | 22 | TSS1500                 | Island   | 3.738E-01  | 7.016E-04 |
| <i>SCNN1B</i>     | cg23113963 | 6338      | 16 | TSS1500                 | Island   | 3.833E-01  | 4.519E-04 |
| <i>SEC31B</i>     | cg20831708 | 25956     | 10 | 5'UTR                   | Island   | 3.198E-01  | 4.690E-04 |
| <i>SEC61A2</i>    | cg18678121 | 55176     | 10 | TSS1500                 | N-Shore  | -3.416E-01 | 8.466E-05 |
| <i>SEPT14</i>     | cg08489623 | 346288    | 7  | Gene body               | Open sea | -3.512E-01 | 3.105E-07 |
| <i>SERPINB10</i>  | cg23696618 | 5273      | 18 | Gene body               | Open sea | -3.736E-01 | 6.087E-11 |
| <i>SFRP1</i>      | cg13398291 | 6422      | 8  | 1stExon                 | Island   | 4.308E-01  | 5.731E-06 |
| <i>SFRP1</i>      | cg15839448 | 6422      | 8  | 1stExon                 | Island   | 4.340E-01  | 3.505E-13 |
| <i>SFRP1</i>      | cg22418909 | 6422      | 8  | 1stExon/5'UTR           | Island   | 4.528E-01  | 9.933E-16 |
| <i>SFRP2</i>      | cg11354906 | 6423      | 4  | TSS200                  | Island   | 3.253E-01  | 5.085E-03 |
| <i>SFRP2</i>      | cg23207990 | 6423      | 4  | TSS1500                 | Island   | 3.677E-01  | 1.067E-07 |
| <i>SFT2D3</i>     | cg11206634 | 84826     | 2  | TSS200                  | N-Shore  | -3.309E-01 | 3.885E-06 |
| <i>SH3GL3</i>     | cg22946150 | 6457      | 15 | Gene body/1stExon/5'UTR | Island   | 4.854E-01  | 2.935E-07 |
| <i>SHD</i>        | cg26646370 | 56961     | 19 | 5'UTR/1stExon           | Island   | 3.806E-01  | 3.731E-02 |
| <i>SIGLEC7</i>    | cg01193293 | 27036     | 19 | TSS1500                 | Open sea | -3.330E-01 | 1.757E-08 |
| <i>SIRPB1</i>     | cg09577651 | 10326     | 20 | TSS200                  | Open sea | -3.342E-01 | 5.882E-10 |
| <i>SIRPD</i>      | cg17423978 | 128646    | 20 | TSS1500                 | Open sea | -3.638E-01 | 2.884E-05 |
| <i>SIX6</i>       | cg19456540 | 4990      | 14 | 1stExon                 | Island   | 4.351E-01  | 7.133E-08 |
| <i>SLAMF7</i>     | cg07837085 | 57823     | 1  | TSS200                  | Open sea | -3.403E-01 | 6.577E-08 |
| <i>SLAMF9</i>     | cg09737668 | 89886     | 1  | Gene body               | Open sea | 3.034E-01  | 4.957E-08 |
| <i>SLC12A5</i>    | cg22752533 | 57468     | 20 | 1stExon/5'UTR/Gene body | Island   | 3.933E-01  | 4.247E-12 |
| <i>SLC13A5</i>    | cg22040627 | 284111    | 17 | TSS1500                 | Island   | 3.378E-01  | 6.299E-04 |
| <i>SLC16A12</i>   | cg09186006 | 387700    | 10 | 1stExon/5'UTR           | Island   | 4.508E-01  | 3.168E-08 |
| <i>SLC16A12</i>   | cg12005098 | 387700    | 10 | TSS200                  | Island   | 4.535E-01  | 4.090E-05 |
| <i>SLC16A7</i>    | cg11871280 | 9194      | 12 | TSS1500                 | Open sea | -3.174E-01 | 3.494E-03 |
| <i>SLC17A1</i>    | cg03835296 | 6568      | 6  | 5'UTR                   | Open sea | -3.156E-01 | 5.556E-04 |
| <i>SLC17A2</i>    | cg05948654 | 10246     | 6  | 1stExon/5'UTR           | Open sea | -3.548E-01 | 3.999E-09 |
| <i>SLC18A3</i>    | cg11389172 | 6572      | 10 | TSS200                  | Island   | 4.355E-01  | 1.321E-08 |
| <i>SLC18A3</i>    | cg14008883 | 6572      | 10 | 1stExon                 | Island   | 3.505E-01  | 3.356E-11 |
| <i>SLC22A12</i>   | cg07220939 | 116085    | 11 | 1stExon/5'UTR           | Open sea | -4.632E-01 | 7.222E-07 |
| <i>SLC22A18</i>   | cg03336167 | 5002      | 11 | Gene body               | Island   | 4.353E-01  | 2.721E-08 |
| <i>SLC22A6</i>    | cg12428447 | 9356      | 11 | TSS1500                 | Open sea | -3.075E-01 | 2.784E-04 |
| <i>SLC26A3</i>    | cg04996020 | 1811      | 7  | TSS1500                 | Open sea | -3.978E-01 | 1.938E-08 |
| <i>SLC26A4</i>    | cg14646244 | 5172      | 7  | TSS1500                 | N-Shore  | -3.829E-01 | 6.582E-14 |
| <i>SLC27A6</i>    | cg07103493 | 28965     | 5  | 5'UTR/1stExon           | Island   | 3.121E-01  | 3.677E-05 |
| <i>SLC30A8</i>    | cg07459489 | 169026    | 8  | TSS200                  | Open sea | -3.128E-01 | 4.035E-03 |
| <i>SLC30A8</i>    | cg23338195 | 169026    | 8  | TSS1500                 | Open sea | -4.287E-01 | 8.770E-10 |
| <i>SLC35F3</i>    | cg25437385 | 148641    | 1  | 1stExon                 | Island   | 4.981E-01  | 5.633E-06 |
| <i>SLC3A1</i>     | cg02192965 | 6519      | 2  | 1stExon                 | Open sea | -4.166E-01 | 7.887E-08 |
| <i>SLC4A1</i>     | cg03580247 | 6521      | 17 | 1stExon/5'UTR           | Open sea | -3.256E-01 | 9.588E-04 |
| <i>SLC5A4</i>     | cg13507893 | 6527      | 22 | Gene body               | Open sea | -3.104E-01 | 5.613E-04 |
| <i>SLC5A7</i>     | cg16232126 | 60482     | 2  | 1stExon/5'UTR           | Island   | 3.775E-01  | 6.319E-05 |
| <i>SLC6A1</i>     | cg11021744 | 6529      | 3  | TSS200                  | N-Shore  | 3.026E-01  | 3.462E-02 |
| <i>SLC6A15</i>    | cg03064067 | 55117     | 12 | TSS1500                 | S-Shore  | 3.202E-01  | 4.307E-05 |
| <i>SLC6A18</i>    | cg19421752 | 348932    | 5  | TSS1500                 | N-Shore  | -3.929E-01 | 3.010E-10 |
| <i>SLC6A19</i>    | cg19421752 | 340024    | 5  | 3'UTR                   | N-Shore  | -3.929E-01 | 3.010E-10 |
| <i>SLC6A2</i>     | cg04490714 | 6530      | 16 | 1stExon/5'UTR           | Island   | 4.186E-01  | 8.947E-07 |
| <i>SLC6A2</i>     | cg10362591 | 6530      | 16 | TSS1500                 | Island   | 3.916E-01  | 1.177E-03 |
| <i>SLC6A3</i>     | cg13202751 | 6531      | 5  | TSS1500                 | Island   | 3.299E-01  | 5.707E-09 |
| <i>SLCO1A2</i>    | cg15583072 | 6579      | 12 | 5'UTR                   | Open sea | -3.298E-01 | 2.468E-09 |
| <i>SLCO1B1</i>    | cg00995065 | 10599     | 12 | TSS1500                 | Open sea | -3.581E-01 | 1.014E-06 |
| <i>SLITRK1</i>    | cg07104706 | 114798    | 13 | 1stExon/5'UTR           | S-Shelf  | 3.124E-01  | 2.079E-02 |
| <i>SLITRK3</i>    | cg14717170 | 22865     | 3  | TSS200                  | Open sea | 3.066E-01  | 5.708E-03 |
| <i>SLITRK5</i>    | cg09083627 | 26050     | 13 | TSS1500                 | Island   | 5.319E-01  | 1.467E-15 |
| <i>SNAP91</i>     | cg21688264 | 9892      | 6  | Gene body/5'UTR         | Island   | 4.747E-01  | 2.120E-06 |
| <i>SNCAIP</i>     | cg04684516 | 9627      | 5  | 1stExon/5'UTR           | Island   | 3.361E-01  | 1.877E-02 |
| <i>SND1</i>       | cg15087147 | 27044     | 7  | Gene body               | Island   | 3.349E-01  | 2.359E-03 |
| <i>SNORD116-1</i> | cg10832166 | 100033413 | 15 | Gene body               | Open sea | -3.305E-01 | 2.625E-07 |
| <i>SNX32</i>      | cg19018097 | 254122    | 11 | TSS200                  | Island   | 3.509E-01  | 4.615E-04 |
| <i>SORCS3</i>     | cg16787600 | 22986     | 10 | 1stExon/5'UTR           | Island   | 5.297E-01  | 7.501E-11 |
| <i>SOX1</i>       | cg06675478 | 6656      | 13 | TSS200                  | Island   | 3.491E-01  | 1.091E-15 |
| <i>SOX11</i>      | cg08432727 | 6664      | 2  | TSS1500                 | N-Shore  | 3.428E-01  | 6.182E-08 |

|            |            |        |    |               |          |            |           |
|------------|------------|--------|----|---------------|----------|------------|-----------|
| SOX11      | cg20008332 | 6664   | 2  | 1stExon       | Island   | 4.666E-01  | 3.396E-10 |
| SOX17      | cg02919422 | 64321  | 8  | 5'UTR/1stExon | Island   | 3.402E-01  | 1.445E-10 |
| SP140      | cg17607231 | 11262  | 2  | TSS200        | Open sea | -3.025E-01 | 1.322E-03 |
| SPACA3     | cg26829529 | 124912 | 17 | TSS1500       | Open sea | -3.005E-01 | 6.923E-11 |
| SPAG6      | cg06908778 | 9576   | 10 | Gene body     | Island   | 3.943E-01  | 3.165E-11 |
| SPATA16    | cg06577725 | 83893  | 3  | 1stExon/5'UTR | Open sea | -3.244E-01 | 4.612E-03 |
| SPATA17    | cg01727899 | 128153 | 1  | Gene body     | S-Shore  | -3.890E-01 | 7.670E-08 |
| SPATA19    | cg18457737 | 219938 | 11 | Gene body     | Open sea | -3.637E-01 | 4.553E-13 |
| SPDYA      | cg04786857 | 245711 | 2  | 5'UTR         | Island   | 3.235E-01  | 2.141E-02 |
| SPG20      | cg18755783 | 23111  | 13 | 5'UTR         | Island   | 3.428E-01  | 2.896E-02 |
| SPHKAP     | cg04072323 | 80309  | 2  | 1stExon/5'UTR | Island   | 3.137E-01  | 6.950E-03 |
| SPHKAP     | cg06092815 | 80309  | 2  | TSS200        | Island   | 3.606E-01  | 3.060E-11 |
| SPOCK1     | cg12832649 | 6695   | 5  | 5'UTR         | Island   | 4.143E-01  | 1.347E-03 |
| SPON1      | cg02994974 | 10418  | 11 | 1stExon       | Island   | 4.112E-01  | 6.856E-05 |
| SPRR2A     | cg18766755 | 6700   | 1  | 5'UTR         | Open sea | -3.484E-01 | 1.163E-09 |
| SPRR2D     | cg14826683 | 6703   | 1  | TSS1500       | Open sea | -3.860E-01 | 2.052E-07 |
| SPSB4      | cg22036988 | 92369  | 3  | TSS1500       | Island   | 3.760E-01  | 9.946E-03 |
| SPTA1      | cg22730004 | 6708   | 1  | TSS1500       | Open sea | -3.047E-01 | 2.273E-12 |
| SRBD1      | cg02630207 | 55133  | 2  | TSS1500       | S-Shore  | -3.235E-01 | 1.296E-06 |
| SRD5A2     | cg15403517 | 6716   | 2  | TSS1500       | Island   | 3.167E-01  | 2.283E-08 |
| SRD5A2     | cg19502744 | 6716   | 2  | 1stExon       | Island   | 3.778E-01  | 8.039E-13 |
| SRP68      | cg21885995 | 6730   | 17 | TSS1500       | N-Shore  | -3.376E-01 | 1.004E-08 |
| SST        | cg02164046 | 6750   | 3  | 1stExon/5'UTR | Island   | 3.786E-01  | 1.484E-09 |
| SSTR4      | cg17586860 | 6754   | 20 | TSS200        | Island   | 4.603E-01  | 3.980E-09 |
| ST6GAL2    | cg04434339 | 84620  | 2  | 1stExon/5'UTR | Island   | 4.214E-01  | 9.518E-06 |
| ST6GALNAC5 | cg13823136 | 81849  | 1  | TSS200        | Island   | 3.027E-01  | 8.564E-03 |
| ST8SIA5    | cg19751300 | 29906  | 18 | 1stExon       | Island   | 3.095E-01  | 1.325E-04 |
| STK38      | cg02964385 | 11329  | 6  | TSS1500       | S-Shore  | -4.209E-01 | 1.835E-11 |
| SYN3       | cg16894211 | 8224   | 22 | TSS1500/5'UTR | Open sea | -4.068E-01 | 6.765E-06 |
| SYT10      | cg00902195 | 341359 | 12 | 1stExon/5'UTR | Island   | 3.187E-01  | 6.939E-04 |
| SYT9       | cg08185661 | 143425 | 11 | 1stExon       | Island   | 4.729E-01  | 1.131E-10 |
| T          | cg17188046 | 6862   | 6  | TSS200        | Island   | 3.744E-01  | 2.256E-03 |
| TAC1       | cg07550362 | 6863   | 7  | TSS200        | Island   | 3.128E-01  | 7.512E-05 |
| TAC1       | cg14221171 | 6863   | 7  | 5'UTR         | Island   | 3.008E-01  | 1.035E-04 |
| TAP1       | cg03465320 | 6890   | 6  | TSS1500       | S-Shore  | -3.112E-01 | 2.348E-09 |
| TAP1       | cg16890093 | 6890   | 6  | 3'UTR         | S-Shore  | -3.305E-01 | 1.476E-08 |
| TCERG1L    | cg03943081 | 256536 | 10 | TSS1500       | Island   | 3.528E-01  | 8.717E-06 |
| TCP10L     | cg20857253 | 140290 | 21 | 5'UTR         | Open sea | -3.656E-01 | 5.084E-11 |
| TDRD9      | cg07613153 | 122402 | 14 | Gene body     | Open sea | -3.108E-01 | 7.218E-10 |
| TERF2IP    | cg08585897 | 54386  | 16 | TSS1500       | N-Shore  | -3.438E-01 | 1.959E-06 |
| TEX15      | cg20939319 | 56154  | 8  | TSS1500       | Open sea | -3.263E-01 | 1.035E-04 |
| TFPI2      | cg14377593 | 7980   | 7  | TSS200        | Island   | 4.040E-01  | 1.595E-05 |
| TFPI2      | cg19784477 | 7980   | 7  | Gene body     | Island   | 3.171E-01  | 6.576E-03 |
| TFPI2      | cg22799321 | 7980   | 7  | Gene body     | Island   | 3.735E-01  | 3.613E-04 |
| TFPI2      | cg23141855 | 7980   | 7  | Gene body     | Island   | 3.910E-01  | 9.167E-07 |
| TFPI2      | cg23686014 | 7980   | 7  | 1stExon       | Island   | 3.795E-01  | 1.203E-04 |
| THRSP      | cg16505204 | 7069   | 11 | TSS1500       | Open sea | -3.425E-01 | 1.634E-05 |
| TINAG      | cg12397274 | 27283  | 6  | TSS1500       | Open sea | -3.070E-01 | 1.079E-11 |
| TLX3       | cg25720804 | 30012  | 5  | 1stExon       | Island   | 4.755E-01  | 2.803E-15 |
| TM4SF19    | cg05445326 | 116211 | 3  | TSS1500       | Open sea | -3.601E-01 | 3.756E-05 |
| TM4SF20    | cg20683151 | 79853  | 2  | 1stExon       | Open sea | -3.298E-01 | 9.402E-04 |
| TM6SF1     | cg14696396 | 53346  | 15 | 1stExon       | Island   | 4.374E-01  | 3.251E-09 |
| TMEFF2     | cg06856528 | 23671  | 2  | 5'UTR/1stExon | Island   | 4.065E-01  | 8.216E-11 |
| TMEFF2     | cg18221862 | 23671  | 2  | 1stExon       | Island   | 3.520E-01  | 1.128E-04 |
| TMEM116    | cg26789453 | 89894  | 12 | TSS1500       | S-Shore  | -3.681E-01 | 2.540E-12 |
| TMEM132E   | cg18338311 | 124842 | 17 | 1stExon/5'UTR | Island   | 4.113E-01  | 1.606E-04 |
| TMEM139    | cg09243021 | 135932 | 7  | 3'UTR         | N-Shore  | 3.462E-01  | 5.769E-06 |
| TMEM155    | cg05396987 | 132332 | 4  | 1stExon/5'UTR | Island   | 3.461E-01  | 6.683E-08 |
| TMEM178    | cg21553524 | 130733 | 2  | 1stExon/5'UTR | Island   | 3.381E-01  | 3.813E-02 |
| TMEM179    | cg00107187 | 388021 | 14 | 1stExon       | Island   | 3.016E-01  | 2.809E-04 |
| TMEM179    | cg03734874 | 388021 | 14 | TSS1500       | Island   | 3.259E-01  | 4.886E-04 |
| TMEM74     | cg15042080 | 157753 | 8  | 1stExon/5'UTR | Island   | 4.262E-01  | 1.634E-02 |
| TMEM90B    | cg16098981 | 79953  | 20 | 5'UTR/1stExon | Island   | 3.828E-01  | 2.054E-03 |



|                  |            |        |    |                  |          |            |           |
|------------------|------------|--------|----|------------------|----------|------------|-----------|
| <i>TMPRSS11F</i> | cg02936740 | 389208 | 4  | TSS1500          | Open sea | -3.674E-01 | 6.887E-10 |
| <i>TMPRSS3</i>   | cg25608949 | 64699  | 21 | TSS200           | Open sea | -3.389E-01 | 4.694E-07 |
| <i>TNF</i>       | cg11484872 | 7124   | 6  | TSS200           | Open sea | -3.068E-01 | 8.227E-07 |
| <i>TNFRSF10A</i> | cg26530341 | 8797   | 8  | TSS1500          | S-Shore  | -4.803E-01 | 1.048E-09 |
| <i>TOX2</i>      | cg11319389 | 84969  | 20 | TSS200/Gene body | Island   | 3.615E-01  | 1.077E-08 |
| <i>TP73</i>      | cg00565688 | 7161   | 1  | TSS1500          | Island   | 3.457E-01  | 2.157E-03 |
| <i>TP73</i>      | cg04391111 | 7161   | 1  | TSS1500          | Island   | 3.217E-01  | 2.324E-02 |
| <i>TP73</i>      | cg16607065 | 7161   | 1  | Gene body/TSS200 | Island   | -3.604E-01 | 5.536E-05 |
| <i>TPM3</i>      | cg12205230 | 7170   | 1  | TSS1500          | Open sea | -3.325E-01 | 8.635E-09 |
| <i>TPSD1</i>     | cg01375871 | 23430  | 16 | TSS1500          | N-Shelf  | -3.582E-01 | 2.466E-07 |
| <i>TRAM1L1</i>   | cg05807991 | 133022 | 4  | TSS200           | Island   | 3.736E-01  | 9.256E-03 |
| <i>TRDN</i>      | cg14462830 | 10345  | 6  | TSS1500          | Open sea | -3.314E-01 | 2.021E-06 |
| <i>TREML2</i>    | cg19005210 | 79865  | 6  | TSS200           | Open sea | -4.065E-01 | 1.095E-07 |
| <i>TRH</i>       | cg01009664 | 7200   | 3  | 5'UTR/1stExon    | Island   | 4.694E-01  | 4.237E-15 |
| <i>TRHDE</i>     | cg13663218 | 29953  | 12 | 1stExon          | Island   | 3.380E-01  | 3.360E-05 |
| <i>TRHR</i>      | cg22268164 | 7201   | 8  | 1stExon          | Open sea | -4.098E-01 | 2.322E-04 |
| <i>TRHR</i>      | cg26989103 | 7201   | 8  | TSS200           | Open sea | -4.113E-01 | 4.796E-05 |
| <i>TRIM15</i>    | cg06051311 | 89870  | 6  | 5'UTR/1stExon    | Open sea | -3.030E-01 | 1.621E-08 |
| <i>TRIM17</i>    | cg23540518 | 51127  | 1  | 1stExon/5'UTR    | Island   | 3.500E-01  | 8.245E-05 |
| <i>TRIM31</i>    | cg00679556 | 11074  | 6  | 5'UTR            | Open sea | -3.635E-01 | 2.884E-09 |
| <i>TRIM31</i>    | cg15238224 | 11074  | 6  | TSS1500          | Open sea | -3.500E-01 | 2.533E-15 |
| <i>TRIM40</i>    | cg09196959 | 135644 | 6  | TSS200           | Open sea | -3.794E-01 | 2.121E-14 |
| <i>TRIM58</i>    | cg07533148 | 25893  | 1  | 1stExon          | Island   | 4.610E-01  | 1.241E-11 |
| <i>TRIM61</i>    | cg00393585 | 391712 | 4  | Gene body        | Island   | 3.918E-01  | 7.515E-03 |
| <i>TRIM63</i>    | cg13998293 | 84676  | 1  | TSS1500          | Open sea | -3.575E-01 | 5.539E-12 |
| <i>TRPA1</i>     | cg01610488 | 8989   | 8  | TSS200           | Island   | 4.754E-01  | 1.763E-06 |
| <i>TRPA1</i>     | cg06493386 | 8989   | 8  | 1stExon/5'UTR    | Island   | 3.103E-01  | 1.131E-05 |
| <i>TRPC4</i>     | cg21432954 | 7223   | 13 | 1stExon/5'UTR    | Island   | 3.251E-01  | 9.153E-03 |
| <i>TRPM2</i>     | cg08191854 | 7226   | 21 | TSS200           | Open sea | -3.947E-01 | 1.352E-10 |
| <i>TRPM6</i>     | cg22161874 | 140803 | 9  | TSS200           | S-Shore  | -3.039E-01 | 2.772E-04 |
| <i>TSGA13</i>    | cg02332073 | 114960 | 7  | TSS1500          | Open sea | -3.227E-01 | 1.344E-09 |
| <i>TSPAN32</i>   | cg00041575 | 10077  | 11 | TSS1500          | Open sea | -4.088E-01 | 3.291E-11 |
| <i>TSPYL5</i>    | cg15747595 | 85453  | 8  | 1stExon          | Island   | 3.161E-01  | 8.221E-04 |
| <i>TUBB6</i>     | cg07307078 | 84617  | 18 | TSS1500          | Island   | 3.665E-01  | 8.729E-03 |
| <i>TWIST1</i>    | cg00240432 | 7291   | 7  | TSS200           | Island   | 3.168E-01  | 1.549E-02 |
| <i>TWIST1</i>    | cg20052718 | 7291   | 7  | 1stExon          | Island   | 4.241E-01  | 1.599E-06 |
| <i>TWIST1</i>    | cg20498685 | 7291   | 7  | 3'UTR            | Island   | 4.118E-01  | 9.894E-06 |
| <i>TWIST1</i>    | cg24446548 | 7291   | 7  | 1stExon/5'UTR    | Island   | 5.647E-01  | 9.907E-06 |
| <i>TWIST1</i>    | cg26312150 | 7291   | 7  | 1stExon          | Island   | 3.284E-01  | 1.277E-04 |
| <i>UCN</i>       | cg04527918 | 7349   | 2  | TSS200           | Island   | 3.727E-01  | 8.287E-07 |
| <i>UGT3A1</i>    | cg23317501 | 133688 | 5  | Gene body        | Open sea | 3.399E-01  | 8.080E-08 |
| <i>UGT3A2</i>    | cg07084163 | 167127 | 5  | Gene body        | Open sea | 3.078E-01  | 7.167E-06 |
| <i>UNC5C</i>     | cg13265789 | 8633   | 4  | TSS1500          | Island   | 3.309E-01  | 3.725E-02 |
| <i>UNC80</i>     | cg14419187 | 285175 | 2  | Gene body        | S-Shore  | 3.204E-01  | 2.868E-03 |
| <i>UTF1</i>      | cg03755123 | 8433   | 10 | TSS1500          | Island   | 4.092E-01  | 1.825E-13 |
| <i>UTF1</i>      | cg09053680 | 8433   | 10 | 1stExon          | Island   | 4.991E-01  | 1.420E-09 |
| <i>VAX1</i>      | cg00263760 | 11023  | 10 | 1stExon          | Island   | 3.418E-01  | 4.660E-05 |
| <i>VDAC3</i>     | cg17910564 | 7419   | 8  | TSS1500          | N-Shore  | -3.018E-01 | 4.944E-11 |
| <i>VHL</i>       | cg16869108 | 7428   | 3  | Gene body        | S-Shore  | -3.426E-01 | 8.272E-08 |
| <i>VHL</i>       | cg24092914 | 7428   | 3  | Gene body        | S-Shore  | -4.214E-01 | 3.741E-06 |
| <i>VIM</i>       | cg12874092 | 7431   | 10 | Gene body        | Island   | 4.370E-01  | 8.482E-03 |
| <i>VIPR2</i>     | cg18349835 | 7434   | 7  | Gene body        | Island   | 5.208E-01  | 4.425E-09 |
| <i>VN1R2</i>     | cg19554294 | 317701 | 19 | 1stExon          | S-Shelf  | -3.093E-01 | 2.153E-09 |
| <i>VNN1</i>      | cg00852964 | 8876   | 6  | 1stExon          | Open sea | -3.363E-01 | 6.075E-06 |
| <i>VNN1</i>      | cg02184413 | 8876   | 6  | TSS200           | Open sea | -3.348E-01 | 2.934E-06 |
| <i>VSTM1</i>     | cg12315311 | 284415 | 19 | TSS1500          | Open sea | -3.492E-01 | 8.189E-21 |
| <i>VSX1</i>      | cg06151165 | 30813  | 20 | Gene body        | Island   | 4.398E-01  | 1.361E-09 |
| <i>VSX1</i>      | cg23097006 | 30813  | 20 | TSS1500          | N-Shore  | -3.391E-01 | 1.160E-03 |
| <i>VWC2</i>      | cg04454951 | 375567 | 7  | TSS1500          | Island   | 3.390E-01  | 7.340E-06 |
| <i>WBSCR17</i>   | cg01366419 | 64409  | 7  | TSS1500          | Island   | 3.853E-01  | 3.593E-06 |
| <i>WDR8</i>      | cg04391111 | 49856  | 1  | TSS1500          | Island   | 3.217E-01  | 2.324E-02 |
| <i>WDR8</i>      | cg26128092 | 49856  | 1  | TSS1500          | Island   | 3.250E-01  | 2.165E-04 |
| <i>WDR86</i>     | cg24068372 | 349136 | 7  | TSS200           | Island   | 3.236E-01  | 1.385E-02 |

|         |            |        |    |                         |          |            |           |
|---------|------------|--------|----|-------------------------|----------|------------|-----------|
| WDR88   | cg26687173 | 126248 | 19 | 1stExon                 | Island   | 3.369E-01  | 2.454E-18 |
| WFDC6   | cg12547930 | 140870 | 20 | TSS1500                 | Open sea | -3.113E-01 | 1.985E-06 |
| WIF1    | cg19427610 | 11197  | 12 | 5'UTR/1stExon           | Island   | 3.456E-01  | 1.298E-02 |
| WIFI2   | cg20592700 | 26100  | 7  | 1stExon                 | Island   | -3.406E-01 | 6.892E-31 |
| WNT2    | cg01830294 | 7472   | 7  | TSS200                  | Island   | 3.517E-01  | 4.438E-05 |
| WNT8A   | cg08603768 | 7478   | 5  | Gene body               | Open sea | -3.190E-01 | 2.377E-08 |
| WT1     | cg01693350 | 7490   | 11 | Gene body               | Island   | 3.539E-01  | 2.735E-07 |
| WT1     | cg04096767 | 7490   | 11 | Gene body               | Island   | 3.064E-01  | 9.667E-05 |
| WT1     | cg13641903 | 7490   | 11 | Gene body               | Island   | 3.845E-01  | 1.549E-15 |
| WT1     | cg15107670 | 7490   | 11 | 1stExon                 | Island   | 3.365E-01  | 1.378E-06 |
| XBP1    | cg18940763 | 7494   | 22 | TSS1500                 | S-Shore  | -3.088E-01 | 1.616E-10 |
| ZBTB46  | cg21291985 | 140685 | 20 | TSS200                  | N-Shelf  | -3.183E-01 | 3.547E-04 |
| ZFP28   | cg23850212 | 140612 | 19 | TSS1500                 | Island   | 3.415E-01  | 1.361E-04 |
| ZFP82   | cg25886284 | 284406 | 19 | 5'UTR/1stExon           | Island   | 3.902E-01  | 7.802E-05 |
| ZNF134  | cg08849574 | 7693   | 19 | 5'UTR                   | S-Shore  | 3.228E-01  | 3.913E-02 |
| ZNF135  | cg16638540 | 7694   | 19 | TSS200                  | Island   | 3.981E-01  | 5.473E-14 |
| ZNF148  | cg15705999 | 7707   | 3  | 5'UTR                   | Island   | -3.259E-01 | 1.630E-24 |
| ZNF154  | cg08668790 | 7710   | 19 | TSS200                  | S-Shore  | 4.258E-01  | 1.840E-08 |
| ZNF154  | cg21790626 | 7710   | 19 | 5'UTR/1stExon           | Island   | 5.187E-01  | 3.323E-10 |
| ZNF177  | cg09643544 | 7730   | 19 | 1stExon/5'UTR           | Island   | 3.091E-01  | 4.439E-10 |
| ZNF22   | cg00899659 | 7570   | 10 | TSS1500                 | N-Shore  | -3.684E-01 | 2.586E-07 |
| ZNF331  | cg15205507 | 55422  | 19 | 1stExon/5'UTR           | Island   | 3.594E-01  | 3.064E-02 |
| ZNF415  | cg10332700 | 55786  | 19 | 5'UTR/1stExon/Gene body | Island   | 3.916E-01  | 1.601E-03 |
| ZNF454  | cg03355526 | 285676 | 5  | 5'UTR                   | Island   | 3.941E-01  | 1.336E-11 |
| ZNF454  | cg23037403 | 285676 | 5  | TSS200                  | Island   | 3.655E-01  | 2.780E-10 |
| ZNF471  | cg14289985 | 57573  | 19 | TSS1500                 | Island   | 3.674E-01  | 1.069E-05 |
| ZNF540  | cg03975694 | 163255 | 19 | 5'UTR/1stExon           | S-Shelf  | 3.590E-01  | 1.214E-11 |
| ZNF540  | cg27389185 | 163255 | 19 | TSS200                  | S-Shore  | 3.359E-01  | 1.103E-14 |
| ZNF542  | cg26309134 | 147947 | 19 | TSS200/Gene body        | Island   | 4.976E-01  | 5.640E-06 |
| ZNF560  | cg04062391 | 147741 | 19 | 5'UTR                   | Island   | 3.116E-01  | 2.409E-04 |
| ZNF577  | cg16731240 | 84765  | 19 | TSS200                  | Island   | 3.439E-01  | 1.446E-02 |
| ZNF610  | cg07703337 | 162963 | 19 | 5'UTR/TSS1500           | Open sea | -3.412E-01 | 7.656E-05 |
| ZNF610  | cg15062535 | 162963 | 19 | 5'UTR/TSS1500           | Open sea | -3.232E-01 | 8.143E-07 |
| ZNF619  | cg21942438 | 285267 | 3  | TSS1500                 | N-Shore  | -3.133E-01 | 5.217E-08 |
| ZNF660  | cg22598028 | 285349 | 3  | 5'UTR/1stExon           | Island   | 3.965E-01  | 1.085E-03 |
| ZNF671  | cg19246110 | 79891  | 19 | 1stExon/5'UTR           | Island   | 4.860E-01  | 4.865E-06 |
| ZNF677  | cg16708981 | 342926 | 19 | TSS1500                 | S-Shore  | 3.312E-01  | 6.829E-05 |
| ZNF677  | cg18335068 | 342926 | 19 | 5'UTR                   | Island   | 3.443E-01  | 8.477E-04 |
| ZNF71   | cg17136126 | 58491  | 19 | TSS200                  | N-Shore  | 3.345E-01  | 4.054E-02 |
| ZNF75A  | cg02825709 | 7627   | 16 | TSS1500                 | N-Shore  | -3.153E-01 | 2.016E-04 |
| ZNF781  | cg25875213 | 163115 | 19 | 5'UTR/1stExon           | Island   | 4.308E-01  | 1.815E-06 |
| ZNF804B | cg27319898 | 219578 | 7  | 1stExon/5'UTR           | Island   | 3.534E-01  | 5.357E-03 |
| ZSCAN1  | cg21331821 | 284312 | 19 | TSS1500                 | Island   | 4.336E-01  | 9.098E-08 |
| ZSCAN10 | cg20055101 | 84891  | 16 | 1stExon                 | S-Shelf  | -3.112E-01 | 7.788E-09 |
| ZSCAN18 | cg06243556 | 65982  | 19 | Gene body/5'UTR/1stExon | Island   | 3.794E-01  | 2.557E-02 |
| ZSCAN18 | cg18888520 | 65982  | 19 | Gene body/TSS200        | Island   | 3.365E-01  | 1.924E-02 |
| NA      | cg13912117 | NA     | 8  | NA                      | Island   | 5.876E-01  | 1.603E-12 |
| NA      | cg05585544 | NA     | 11 | NA                      | Open sea | -3.171E-01 | 1.056E-04 |
| NA      | cg25538571 | NA     | 8  | NA                      | Open sea | -3.142E-01 | 4.018E-06 |
| NA      | cg20234959 | NA     | 1  | NA                      | Open sea | -3.034E-01 | 5.987E-06 |
| NA      | cg13391235 | NA     | 16 | NA                      | N-Shore  | -3.012E-01 | 2.789E-04 |

(B) Genes showing significant differences of DNA methylation levels between T and C samples in Cluster B1

| Gene symbol | Probe ID <sup>1</sup> | National Center for Biotechnology Information (NCBI) Gene ID | Chromosome | Gene region <sup>2</sup> | CpG type <sup>3</sup> | $\Delta\beta_{T,C}$ | <i>P</i>  |
|-------------|-----------------------|--------------------------------------------------------------|------------|--------------------------|-----------------------|---------------------|-----------|
| ABCC12      | cg14074641            | 94160                                                        | 16         | TSS1500                  | Open sea              | -4.107E-01          | 3.972E-09 |
| ABCC2       | cg09448875            | 1244                                                         | 10         | TSS200                   | Open sea              | -3.035E-01          | 1.915E-03 |
| ACAT1       | cg24341800            | 38                                                           | 11         | TSS200                   | Island                | 3.048E-01           | 5.593E-15 |
| ACTA1       | cg13547644            | 58                                                           | 1          | 5'UTR                    | Island                | 3.054E-01           | 1.746E-03 |
| ACTL6B      | cg08572611            | 51412                                                        | 7          | Gene body                | Island                | 3.343E-01           | 1.251E-03 |
| ADAM12      | cg11668923            | 8038                                                         | 10         | 1stExon/5'UTR            | Island                | 3.422E-01           | 2.608E-04 |
| ADAMTS18    | cg03238797            | 170692                                                       | 16         | 1stExon/5'UTR            | Island                | 4.005E-01           | 9.282E-06 |
| ADCY4       | cg16761581            | 196883                                                       | 14         | 1stExon                  | Island                | 3.294E-01           | 1.957E-02 |

|             |            |        |    |                   |          |            |           |
|-------------|------------|--------|----|-------------------|----------|------------|-----------|
| ADD2        | cg25631352 | 119    | 2  | TSS200            | S-Shore  | 3.159E-01  | 4.620E-03 |
| ADHFE1      | cg01988129 | 137872 | 8  | Gene body         | Island   | 4.803E-01  | 2.587E-05 |
| ADRB3       | cg17619823 | 155    | 8  | 1stExon           | Island   | 3.372E-01  | 1.183E-03 |
| AFF3        | cg06183267 | 3899   | 2  | TSS200            | Open sea | -3.356E-01 | 6.081E-06 |
| AIM2        | cg10636246 | 9447   | 1  | TSS1500           | Open sea | -4.655E-01 | 1.248E-14 |
| AJAP1       | cg17525406 | 55966  | 1  | Gene body         | Island   | 5.164E-01  | 1.059E-07 |
| AJAP1       | cg20959866 | 55966  | 1  | TSS1500           | Island   | 3.281E-01  | 2.471E-04 |
| ALDH1A3     | cg21359747 | 220    | 15 | Gene body         | Island   | 3.642E-01  | 3.082E-02 |
| ALX4        | cg26365854 | 60529  | 11 | Gene body         | Island   | 3.410E-01  | 1.374E-02 |
| AMICA1      | cg07376232 | 120425 | 11 | Gene body/TSS1500 | Open sea | -3.447E-01 | 4.081E-08 |
| AMPH        | cg10293925 | 273    | 7  | 5'UTR/1stExon     | Island   | 4.484E-01  | 2.170E-06 |
| ANKRD13C    | cg19342782 | 81573  | 1  | TSS1500           | S-Shore  | -3.147E-01 | 4.161E-13 |
| ANXA13      | cg02800334 | 312    | 8  | TSS1500           | Open sea | -3.236E-01 | 4.068E-06 |
| ARHGAP15    | cg27365426 | 55843  | 2  | TSS1500           | Open sea | -3.383E-01 | 2.959E-08 |
| BAALC       | cg10918202 | 79870  | 8  | 1stExon           | Island   | 3.662E-01  | 3.633E-02 |
| BATF        | cg15645309 | 10538  | 14 | TSS200            | Open sea | -3.139E-01 | 5.500E-10 |
| BLNK        | cg16779976 | 29760  | 10 | 1stExon           | Open sea | -3.458E-01 | 3.658E-13 |
| BNC1        | cg18952647 | 646    | 15 | TSS1500           | Island   | 3.755E-01  | 4.304E-03 |
| BPI         | cg08254089 | 671    | 20 | Gene body         | Open sea | -3.436E-01 | 2.433E-10 |
| BPTF        | cg16435601 | 2186   | 17 | 1stExon           | S-Shore  | -3.696E-01 | 7.823E-20 |
| C10orf25    | cg00899659 | 220979 | 10 | Gene body         | N-Shore  | -3.360E-01 | 6.978E-05 |
| C11orf21    | cg00041575 | 29125  | 11 | Gene body         | Open sea | -3.862E-01 | 5.789E-13 |
| C14orf162   | cg14912575 | 56936  | 14 | TSS1500           | Island   | 3.248E-01  | 4.036E-06 |
| C17orf73    | cg03016571 | 55018  | 17 | Gene body         | Open sea | -3.077E-01 | 7.586E-04 |
| C17orf93    | cg12374721 | 360205 | 17 | TSS1500           | N-Shore  | 4.176E-01  | 1.515E-06 |
| C1orf150    | cg05767404 | 148823 | 1  | Gene body         | Open sea | -3.574E-01 | 4.190E-06 |
| C1orf59     | cg00328227 | 113802 | 1  | TSS200/TSS1500    | Island   | -3.211E-01 | 1.507E-09 |
| C8orf56     | cg10918202 | 157556 | 8  | Gene body         | Island   | 3.662E-01  | 3.633E-02 |
| CACNB2      | cg01805540 | 783    | 10 | 1stExon           | Island   | 4.326E-01  | 4.795E-05 |
| CASP8       | cg26799474 | 841    | 2  | 5'UTR             | Open sea | -3.354E-01 | 4.596E-10 |
| CBLN4       | cg25993718 | 140689 | 20 | TSS200            | Island   | 3.169E-01  | 1.208E-07 |
| CCDC106     | cg12582959 | 29903  | 19 | 5'UTR/1stExon     | N-Shore  | 3.161E-01  | 1.750E-03 |
| CCDC141     | cg12501949 | 285025 | 2  | TSS1500           | Open sea | -3.026E-01 | 6.469E-09 |
| CCDC37      | cg00891278 | 348807 | 3  | 1stExon/5'UTR     | Island   | 3.312E-01  | 4.253E-03 |
| CCDC37      | cg20312228 | 348807 | 3  | TSS200            | Island   | 3.262E-01  | 1.053E-03 |
| CCL14-CCL15 | cg23743114 | NA     | 17 | Gene body         | Open sea | -4.266E-01 | 2.049E-06 |
| CCL14-CCL15 | cg26548883 | NA     | 17 | TSS1500           | Open sea | -3.074E-01 | 3.707E-09 |
| CCL15       | cg23743114 | 6359   | 17 | Gene body         | Open sea | -4.266E-01 | 2.049E-06 |
| CCL15       | cg26548883 | 6359   | 17 | TSS1500           | Open sea | -3.074E-01 | 3.707E-09 |
| CCL7        | cg02936263 | 6354   | 17 | TSS1500           | Open sea | -3.055E-01 | 3.924E-06 |
| CD1B        | cg04574507 | 910    | 1  | Gene body         | Open sea | -3.304E-01 | 1.011E-04 |
| CD2         | cg16719404 | 914    | 1  | TSS1500           | Open sea | -3.359E-01 | 4.492E-09 |
| CD209       | cg07608333 | 30835  | 19 | TSS1500           | Open sea | -3.850E-01 | 2.090E-09 |
| CD300E      | cg04995095 | 342510 | 17 | Gene body         | Open sea | -3.273E-01 | 1.363E-06 |
| CD300LB     | cg10523494 | 124599 | 17 | TSS1500           | Open sea | -3.517E-01 | 5.332E-09 |
| CD37        | cg10037005 | 951    | 19 | TSS200            | N-Shelf  | -4.262E-01 | 2.609E-07 |
| CD53        | cg22325572 | 963    | 1  | 5'UTR             | Open sea | -3.932E-01 | 7.901E-08 |
| CD8A        | cg17108819 | 925    | 2  | 5'UTR/1stExon     | Island   | 3.710E-01  | 3.188E-02 |
| CDH13       | cg00806490 | 1012   | 16 | Gene body         | Island   | 3.143E-01  | 1.398E-03 |
| CDH18       | cg27043873 | 1016   | 5  | 5'UTR             | Open sea | -3.555E-01 | 6.182E-04 |
| CDO1        | cg12880658 | 1036   | 5  | 1stExon/5'UTR     | Island   | 3.397E-01  | 1.546E-04 |
| CELSR1      | cg06268694 | 9620   | 22 | 1stExon           | Island   | 3.196E-01  | 1.306E-02 |
| CENPP       | cg24105685 | 401541 | 9  | Gene body         | Open sea | -3.359E-01 | 2.275E-05 |
| CHAT        | cg11389172 | 1103   | 10 | 5'UTR             | Island   | 3.352E-01  | 2.141E-03 |
| CHRNA6      | cg07906724 | 8973   | 8  | TSS1500           | Open sea | -4.256E-01 | 5.257E-13 |
| CLEC2D      | cg12810837 | 29121  | 12 | TSS200            | Open sea | -3.997E-01 | 1.318E-07 |
| CNIH3       | cg00290506 | 149111 | 1  | 1stExon/5'UTR     | Island   | 3.985E-01  | 5.142E-04 |
| CNR1        | cg23276695 | 1268   | 6  | 5'UTR             | Open sea | -3.885E-01 | 3.466E-06 |
| CNRIP1      | cg07080358 | 25927  | 2  | 1stExon           | Island   | 4.082E-01  | 2.270E-02 |
| CNTNAP2     | cg16254309 | 26047  | 7  | Gene body         | S-Shore  | 3.030E-01  | 1.016E-03 |
| COL4A1      | cg27546237 | 1282   | 13 | TSS1500           | Island   | 3.582E-01  | 6.382E-06 |
| COL4A2      | cg27546237 | 1284   | 13 | Gene body         | Island   | 3.582E-01  | 6.382E-06 |
| COLEC12     | cg19461621 | 81035  | 18 | TSS1500           | S-Shore  | 3.213E-01  | 2.458E-03 |

|          |            |        |    |               |          |            |           |
|----------|------------|--------|----|---------------|----------|------------|-----------|
| CPA3     | cg24290574 | 1359   | 3  | 1stExon       | Open sea | -3.833E-01 | 9.066E-10 |
| CPA4     | cg19690404 | 51200  | 7  | Gene body     | Open sea | -3.066E-01 | 1.381E-06 |
| CPB2     | cg14662172 | 1361   | 13 | 1stExon       | Open sea | -3.474E-01 | 1.014E-04 |
| CRMP1    | cg03544320 | 1400   | 4  | 1stExon       | Island   | 4.114E-01  | 1.367E-06 |
| GSNK1A1L | cg01668383 | 122011 | 13 | 1stExon/5'UTR | Open sea | -3.318E-01 | 1.400E-05 |
| CST7     | cg11804789 | 8530   | 20 | TSS200        | Open sea | -4.032E-01 | 1.035E-09 |
| CSTL1    | cg20171451 | 128817 | 20 | TSS1500       | Open sea | 3.447E-01  | 6.129E-29 |
| CTNNA3   | cg00132141 | 29119  | 10 | TSS1500       | Open sea | -3.007E-01 | 2.187E-07 |
| CUX2     | cg09229912 | 23316  | 12 | 1stExon/5'UTR | Island   | 4.254E-01  | 1.682E-05 |
| CXCR1    | cg13519373 | 3577   | 2  | 5'UTR         | Open sea | -3.673E-01 | 8.039E-07 |
| DCC      | cg01839464 | 1630   | 18 | Gene body     | Island   | 3.005E-01  | 4.029E-03 |
| DEFB118  | cg03014957 | 117285 | 20 | TSS1500       | Open sea | -3.006E-01 | 8.398E-07 |
| DEFB118  | cg20312687 | 117285 | 20 | Gene body     | Open sea | -3.097E-01 | 2.714E-04 |
| DES      | cg18182399 | 1674   | 2  | 1stExon/5'UTR | N-Shore  | 3.059E-01  | 6.352E-03 |
| DLK1     | cg17412258 | 8788   | 14 | TSS1500       | Island   | 3.006E-01  | 6.218E-04 |
| DLX5     | cg11997899 | 1749   | 7  | TSS200        | Island   | 3.128E-01  | 6.910E-05 |
| DLX5     | cg13462129 | 1749   | 7  | Gene body     | Island   | 3.037E-01  | 7.128E-04 |
| DMBX1    | cg09914444 | 127343 | 1  | TSS1500       | Open sea | -4.220E-01 | 5.592E-12 |
| DMKN     | cg10133777 | 93099  | 19 | TSS1500       | Open sea | -3.844E-01 | 3.367E-08 |
| DMRT1    | cg03168582 | 1761   | 9  | 1stExon       | Island   | 4.507E-01  | 7.443E-03 |
| DMRT2    | cg00250430 | 10655  | 9  | 5'UTR         | N-Shore  | 3.000E-01  | 3.367E-02 |
| DMRT3    | cg12420104 | 58524  | 9  | 1stExon       | Island   | 3.220E-01  | 6.279E-03 |
| DNASE1L2 | cg12619509 | 1775   | 16 | 5'UTR         | Island   | 3.502E-01  | 1.625E-09 |
| DOK5     | cg11822659 | 55816  | 20 | Gene body     | Island   | 3.094E-01  | 2.280E-02 |
| DPYS     | cg10303487 | 1807   | 8  | 1stExon       | Island   | 4.683E-01  | 7.420E-11 |
| DPYSL4   | cg12109455 | 10570  | 10 | Gene body     | Island   | 3.027E-01  | 9.570E-04 |
| DRD4     | cg06825142 | 1815   | 11 | TSS200        | Island   | 3.482E-01  | 3.487E-02 |
| DSCR10   | cg17233935 | 259234 | 21 | TSS1500       | Open sea | -3.537E-01 | 4.824E-06 |
| DUSP2    | cg01148741 | 1844   | 2  | TSS1500       | Island   | -3.556E-01 | 2.649E-14 |
| ECEL1    | cg25431974 | 9427   | 2  | TSS1500       | Island   | 3.616E-01  | 4.439E-10 |
| ECM2     | cg24105685 | 1842   | 9  | TSS1500       | Open sea | -3.359E-01 | 2.275E-05 |
| EDIL3    | cg16773899 | 10085  | 5  | 5'UTR/1stExon | Island   | 3.003E-01  | 1.164E-02 |
| EDNRB    | cg23316360 | 1910   | 13 | 5'UTR/1stExon | Island   | 4.150E-01  | 2.188E-07 |
| EFCAB1   | cg22836229 | 79645  | 8  | 5'UTR/1stExon | Island   | 3.154E-01  | 4.111E-03 |
| ELOVL2   | cg13562911 | 54898  | 6  | Gene body     | Island   | 4.050E-01  | 3.598E-02 |
| EMCN     | cg12532667 | 51705  | 4  | TSS1500       | Open sea | -3.025E-01 | 1.790E-08 |
| EPB41L3  | cg00027083 | 23136  | 18 | 5'UTR         | Island   | 3.896E-01  | 9.160E-10 |
| EPDR1    | cg27641018 | 54749  | 7  | TSS1500       | N-Shore  | -3.244E-01 | 2.081E-04 |
| EPHA5    | cg18420965 | 2044   | 4  | Gene body     | N-Shore  | 3.067E-01  | 1.996E-02 |
| EPO      | cg08575537 | 2056   | 7  | Gene body     | Island   | 4.026E-01  | 1.967E-04 |
| ERC2     | cg04759439 | 26059  | 3  | TSS1500       | Island   | 3.633E-01  | 2.070E-03 |
| ERP29    | cg26789453 | 10961  | 12 | Gene body     | S-Shore  | -3.719E-01 | 1.148E-11 |
| EYA4     | cg01805282 | 2070   | 6  | 5'UTR         | Island   | 3.314E-01  | 1.161E-04 |
| EYA4     | cg20286200 | 2070   | 6  | TSS1500       | Island   | 3.449E-01  | 5.168E-04 |
| EYA4     | cg24176563 | 2070   | 6  | 5'UTR/1stExon | Island   | 3.421E-01  | 5.128E-05 |
| EYA4     | cg26656135 | 2070   | 6  | 5'UTR/1stExon | Island   | 3.375E-01  | 4.688E-04 |
| FAM101A  | cg21453309 | 144347 | 12 | 5'UTR         | Open sea | 3.106E-01  | 3.312E-09 |
| FAM123A  | cg22029275 | 219287 | 13 | 1stExon/5'UTR | Island   | 3.954E-01  | 2.885E-03 |
| FAM150A  | cg17162024 | 389658 | 8  | TSS1500       | Island   | 3.848E-01  | 8.791E-04 |
| FAM20A   | cg13591701 | 54757  | 17 | 5'UTR/1stExon | Island   | 3.594E-01  | 4.610E-02 |
| FAM43B   | cg20404387 | 163933 | 1  | 1stExon/5'UTR | Island   | 3.031E-01  | 6.854E-04 |
| FBN1     | cg18671950 | 2200   | 15 | Gene body     | Island   | 3.664E-01  | 1.045E-03 |
| FBN2     | cg25084878 | 2201   | 5  | 1stExon/5'UTR | Island   | 4.108E-01  | 3.314E-05 |
| FCAR     | cg05252264 | 2204   | 19 | 1stExon       | Open sea | -3.216E-01 | 1.128E-05 |
| FCRL3    | cg08786003 | 115352 | 1  | TSS200        | Open sea | -3.335E-01 | 8.388E-05 |
| FCRL3    | cg25259754 | 115352 | 1  | Gene body     | Open sea | -3.062E-01 | 3.109E-06 |
| FLRT2    | cg17410236 | 23768  | 14 | 1stExon/5'UTR | Island   | 3.946E-01  | 5.038E-05 |
| FLT3     | cg07017374 | 2322   | 13 | Gene body     | Island   | 4.948E-01  | 4.345E-04 |
| FLT4     | cg00489401 | 2324   | 5  | Gene body     | Island   | 3.570E-01  | 1.464E-06 |
| FOLR2    | cg11295113 | 2350   | 11 | 1stExon/5'UTR | Open sea | -3.125E-01 | 3.093E-05 |
| FOXD3    | cg22815110 | 27022  | 1  | 1stExon       | Island   | 3.656E-01  | 1.275E-03 |
| FOXP1    | cg10300684 | 2290   | 14 | 1stExon/5'UTR | N-Shore  | 3.068E-01  | 5.262E-04 |
| FOXP2    | cg19884262 | 399823 | 10 | 1stExon       | Island   | 3.077E-01  | 1.104E-04 |

|                  |            |        |    |                   |          |            |           |
|------------------|------------|--------|----|-------------------|----------|------------|-----------|
| <i>FZD10</i>     | cg23054883 | 11211  | 12 | 1stExon           | Island   | 3.195E-01  | 3.453E-03 |
| <i>GAL3ST3</i>   | cg21238818 | 89792  | 11 | 5'UTR/1stExon     | Island   | 3.540E-01  | 5.080E-10 |
| <i>GALR1</i>     | cg04534765 | 2587   | 18 | 1stExon/5'UTR     | Island   | 4.028E-01  | 3.628E-08 |
| <i>GALR1</i>     | cg10486998 | 2587   | 18 | TSS1500           | Island   | 3.017E-01  | 7.066E-04 |
| <i>GALR1</i>     | cg26721264 | 2587   | 18 | TSS1500           | Island   | 3.788E-01  | 2.681E-05 |
| <i>GBG71</i>     | cg01169778 | 26301  | 9  | 5'UTR             | Island   | 4.225E-01  | 1.743E-13 |
| <i>GCM1</i>      | cg20967220 | 8521   | 6  | TSS200            | Open sea | -3.014E-01 | 2.355E-03 |
| <i>GCM2</i>      | cg02844545 | 9247   | 6  | 1stExon/5'UTR     | Island   | 3.177E-01  | 4.480E-07 |
| <i>GDNF</i>      | cg07442479 | 2668   | 5  | 1stExon/5'UTR     | Island   | 3.348E-01  | 5.984E-04 |
| <i>GDPD3</i>     | cg13543096 | 79153  | 16 | TSS1500           | Open sea | 3.304E-01  | 3.103E-18 |
| <i>GK2</i>       | cg17738194 | 2712   | 4  | TSS200            | Open sea | -3.094E-01 | 1.335E-04 |
| <i>GNA15</i>     | cg26482939 | 2769   | 19 | Gene body         | Open sea | -3.815E-01 | 8.665E-09 |
| <i>GPATCH2</i>   | cg01727899 | 55105  | 1  | TSS1500           | S-Shore  | -3.546E-01 | 3.391E-10 |
| <i>GPR25</i>     | cg21870884 | 2848   | 1  | 1stExon           | Island   | 3.324E-01  | 2.861E-05 |
| <i>GPR26</i>     | cg02757432 | 2849   | 10 | 1stExon           | Island   | 3.574E-01  | 2.932E-12 |
| <i>GPR75</i>     | cg14832904 | 10936  | 2  | 5'UTR/1stExon     | Island   | 3.564E-01  | 3.027E-13 |
| <i>GPR75</i>     | cg19664945 | 10936  | 2  | TSS1500           | S-Shore  | 3.630E-01  | 9.142E-12 |
| <i>GPX7</i>      | cg16557944 | 2882   | 1  | 1stExon           | Island   | 4.044E-01  | 1.208E-02 |
| <i>GREB1</i>     | cg10612997 | 9687   | 2  | TSS1500           | Open sea | -3.336E-01 | 3.905E-05 |
| <i>GREB1</i>     | cg10849854 | 9687   | 2  | 5'UTR             | Open sea | -3.487E-01 | 4.534E-06 |
| <i>GRIA2</i>     | cg25148589 | 2891   | 4  | 1stExon/5'UTR     | N-Shore  | 3.108E-01  | 3.010E-06 |
| <i>GRIA4</i>     | cg09980522 | 2893   | 11 | Gene body/1stExon | S-Shore  | 3.559E-01  | 1.578E-07 |
| <i>GRIK2</i>     | cg26316946 | 2898   | 6  | 1stExon/5'UTR     | Island   | 3.063E-01  | 3.174E-03 |
| <i>GRIK3</i>     | cg06722633 | 2899   | 1  | Gene body         | Island   | 3.365E-01  | 4.859E-04 |
| <i>GUCY2C</i>    | cg18754342 | 2984   | 12 | 1stExon           | Open sea | -3.621E-01 | 1.217E-03 |
| <i>HAND2</i>     | cg01580681 | 9464   | 4  | 1stExon           | N-Shore  | 3.129E-01  | 3.285E-05 |
| <i>HAVCR2</i>    | cg17484237 | 84868  | 5  | 5'UTR/1stExon     | Open sea | -3.575E-01 | 4.708E-08 |
| <i>HBB</i>       | cg14544583 | 3043   | 11 | TSS1500           | Open sea | -3.179E-01 | 4.584E-04 |
| <i>HBE1</i>      | cg08970694 | 3046   | 11 | Gene body         | Open sea | -3.352E-01 | 6.952E-07 |
| <i>HBQ1</i>      | cg07703401 | 3049   | 16 | 1stExon/5'UTR     | Island   | 3.348E-01  | 4.087E-03 |
| <i>HHIPL1</i>    | cg06834875 | 84439  | 14 | TSS1500           | Island   | -3.364E-01 | 2.461E-09 |
| <i>HHLA3</i>     | cg19342782 | 11147  | 1  | Gene body         | S-Shore  | -3.147E-01 | 4.161E-13 |
| <i>HIF3A</i>     | cg07022477 | 64344  | 19 | TSS1500           | N-Shore  | -3.495E-01 | 8.171E-05 |
| <i>HIST1H2BO</i> | cg12629515 | 8348   | 6  | TSS1500           | N-Shore  | -3.783E-01 | 3.904E-15 |
| <i>HIST1H3J</i>  | cg12629515 | 8356   | 6  | TSS1500           | N-Shore  | -3.783E-01 | 3.904E-15 |
| <i>HKR1</i>      | cg12024906 | 284459 | 19 | 1stExon/5'UTR     | Island   | 3.136E-01  | 3.807E-03 |
| <i>HOXA9</i>     | cg01381846 | 3205   | 7  | 1stExon           | Island   | 3.535E-01  | 3.252E-09 |
| <i>HOXA9</i>     | cg26521404 | 3205   | 7  | 1stExon           | Island   | 4.588E-01  | 8.118E-12 |
| <i>HOXA9</i>     | cg27009703 | 3205   | 7  | 1stExon           | Island   | 3.043E-01  | 3.314E-09 |
| <i>HOXB4</i>     | cg08089301 | 3214   | 17 | 1stExon           | Island   | 3.948E-01  | 1.255E-03 |
| <i>HOXB4</i>     | cg14458834 | 3214   | 17 | 1stExon           | Island   | 3.836E-01  | 4.459E-02 |
| <i>HOXB4</i>     | cg21546671 | 3214   | 17 | 1stExon           | Island   | 3.783E-01  | 2.837E-02 |
| <i>HOXD8</i>     | cg15520279 | 3234   | 2  | 5'UTR/1stExon     | Island   | 3.445E-01  | 1.281E-05 |
| <i>HOXD9</i>     | cg14991487 | 3235   | 2  | TSS200            | Island   | 4.026E-01  | 7.833E-05 |
| <i>HS3ST3A1</i>  | cg07480567 | 9955   | 17 | 1stExon/5'UTR     | Island   | 3.220E-01  | 1.497E-02 |
| <i>HSPA2</i>     | cg27120999 | 3306   | 14 | 1stExon           | Island   | 3.118E-01  | 6.069E-05 |
| <i>ID4</i>       | cg17252960 | 3400   | 6  | TSS1500           | N-Shore  | 3.163E-01  | 6.103E-04 |
| <i>IDO2</i>      | cg16957569 | 169355 | 8  | TSS1500           | Open sea | -3.035E-01 | 6.060E-06 |
| <i>IGF2</i>      | cg13791131 | 3481   | 11 | 5'UTR             | Island   | 3.651E-01  | 6.771E-06 |
| <i>IGF2</i>      | cg25574024 | 3481   | 11 | 5'UTR             | Island   | 4.052E-01  | 3.422E-06 |
| <i>IGF2AS</i>    | cg13791131 | 51214  | 11 | Gene body         | Island   | 3.651E-01  | 6.771E-06 |
| <i>IGF2AS</i>    | cg25574024 | 51214  | 11 | Gene body         | Island   | 4.052E-01  | 3.422E-06 |
| <i>IGSF21</i>    | cg23349790 | 84966  | 1  | 5'UTR/1stExon     | Island   | 4.217E-01  | 8.244E-06 |
| <i>IL1B</i>      | cg07935264 | 3553   | 2  | TSS200            | Open sea | -4.106E-01 | 2.714E-14 |
| <i>IL1R2</i>     | cg17142183 | 7850   | 2  | TSS200            | Open sea | -3.139E-01 | 2.884E-03 |
| <i>IL25</i>      | cg14366598 | 64806  | 14 | TSS1500           | Open sea | -3.144E-01 | 2.965E-08 |
| <i>IL2RA</i>     | cg26105232 | 3559   | 10 | TSS1500           | Open sea | -3.421E-01 | 9.844E-07 |
| <i>INS-IGF2</i>  | cg13791131 | 723961 | 11 | Gene body         | Island   | 3.651E-01  | 6.771E-06 |
| <i>INS-IGF2</i>  | cg25574024 | 723961 | 11 | Gene body         | Island   | 4.052E-01  | 3.422E-06 |
| <i>IPO5</i>      | cg01679262 | 3843   | 13 | 5'UTR             | Open sea | -4.031E-01 | 5.623E-12 |
| <i>IRX4</i>      | cg03963198 | 50805  | 5  | 5'UTR/1stExon     | Island   | 4.278E-01  | 1.490E-06 |
| <i>IVL</i>       | cg25082710 | 3713   | 1  | TSS1500           | Open sea | -3.794E-01 | 6.758E-12 |
| <i>KARS</i>      | cg08585897 | 3735   | 16 | 5'UTR/Gene body   | N-Shore  | -3.063E-01 | 1.280E-06 |

|                     |            |           |    |                 |          |            |           |
|---------------------|------------|-----------|----|-----------------|----------|------------|-----------|
| <i>KCNA6</i>        | cg26162582 | 3742      | 12 | 5'UTR/1stExon   | Island   | 3.452E-01  | 5.015E-03 |
| <i>KCNK16</i>       | cg02611419 | 83795     | 6  | 3'UTR           | S-Shore  | -3.039E-01 | 1.639E-05 |
| <i>KCNK17</i>       | cg02611419 | 89822     | 6  | TSS1500         | S-Shore  | -3.039E-01 | 1.639E-05 |
| <i>KCNQ5</i>        | cg24687051 | 56479     | 6  | 1stExon         | Island   | 4.636E-01  | 3.792E-03 |
| <i>KCTD8</i>        | cg12300353 | 386617    | 4  | 1stExon         | Island   | 3.258E-01  | 1.532E-03 |
| <i>KHDRBS2</i>      | cg18239753 | 202559    | 6  | 1stExon/5'UTR   | Island   | 3.073E-01  | 5.658E-05 |
| <i>KIAA1026</i>     | cg17657618 | 23254     | 1  | Gene body       | Open sea | -3.159E-01 | 3.028E-11 |
| <i>KLK9</i>         | cg17031773 | 284366    | 19 | TSS1500         | Open sea | -3.084E-01 | 1.109E-07 |
| <i>KRT1</i>         | cg17405586 | 3848      | 12 | TSS200          | Open sea | -3.516E-01 | 3.531E-05 |
| <i>KRT85</i>        | cg21518208 | 3891      | 12 | TSS200          | S-Shore  | -3.309E-01 | 1.927E-06 |
| <i>KRTAP11-1</i>    | cg22643217 | 337880    | 21 | TSS200          | Open sea | -3.368E-01 | 1.811E-08 |
| <i>KRTAP26-1</i>    | cg18822544 | 388818    | 21 | 5'UTR/1stExon   | Open sea | -3.254E-01 | 1.534E-09 |
| <i>KRTDAP</i>       | cg10305797 | 388533    | 19 | TSS1500         | Open sea | -3.417E-01 | 1.103E-03 |
| <i>LACRT</i>        | cg07643942 | 90070     | 12 | TSS1500         | Open sea | -3.873E-01 | 3.242E-06 |
| <i>LAMA1</i>        | cg07846220 | 284217    | 18 | 1stExon         | Island   | 4.532E-01  | 5.669E-11 |
| <i>LAT2</i>         | cg03375002 | 7462      | 7  | TSS1500         | Open sea | -3.477E-01 | 2.781E-08 |
| <i>LCP1</i>         | cg17771150 | 3936      | 13 | 5'UTR           | Open sea | -3.450E-01 | 5.993E-06 |
| <i>LEP</i>          | cg19594666 | 3952      | 7  | TSS200          | Island   | 3.112E-01  | 1.679E-09 |
| <i>LHX1</i>         | cg22660578 | 3975      | 17 | TSS1500         | Island   | 3.346E-01  | 1.211E-04 |
| <i>LILRA2</i>       | cg19486673 | 11027     | 19 | TSS1500         | Open sea | -3.244E-01 | 8.510E-10 |
| <i>LOC100271831</i> | cg13543096 | NA        | 16 | TSS200          | Open sea | 3.304E-01  | 3.103E-18 |
| <i>LOC100302652</i> | cg14832904 | 100302652 | 2  | 1stExon         | Island   | 3.564E-01  | 3.027E-13 |
| <i>LOC100302652</i> | cg19664945 | 100302652 | 2  | TSS200          | S-Shore  | 3.630E-01  | 9.142E-12 |
| <i>LOC284805</i>    | cg26331247 | 284805    | 20 | Gene body       | Open sea | -3.044E-01 | 9.625E-07 |
| <i>LOC286002</i>    | cg14646244 | 286002    | 7  | Gene body       | N-Shore  | -3.555E-01 | 3.214E-10 |
| <i>LRRC4</i>        | cg15087147 | 64101     | 7  | TSS1500         | Island   | 3.207E-01  | 5.275E-04 |
| <i>LRTOMT</i>       | cg23256971 | 220074    | 11 | 5'UTR           | S-Shore  | 3.515E-01  | 2.453E-31 |
| <i>LVRN</i>         | cg25044651 | 206338    | 5  | 1stExon         | Island   | 3.245E-01  | 3.250E-06 |
| <i>MAEL</i>         | cg18894878 | 84944     | 1  | TSS1500         | Island   | -3.017E-01 | 9.028E-04 |
| <i>MAFB</i>         | cg02497758 | 9935      | 20 | 1stExon         | Island   | 3.831E-01  | 1.857E-05 |
| <i>MED21</i>        | cg01982833 | 9412      | 12 | TSS1500         | N-Shore  | -3.178E-01 | 5.214E-09 |
| <i>MGAT5B</i>       | cg00654814 | 146664    | 17 | 1stExon/5'UTR   | Island   | 3.215E-01  | 2.700E-02 |
| <i>MGMT</i>         | cg07638938 | 4255      | 10 | Gene body       | Open sea | 4.126E-01  | 8.594E-13 |
| <i>MLC1</i>         | cg05861567 | 23209     | 22 | 5'UTR/1stExon   | Open sea | -3.183E-01 | 4.781E-05 |
| <i>MMP26</i>        | cg12493906 | 56547     | 11 | TSS200          | Open sea | -3.183E-01 | 2.592E-03 |
| <i>MMRN1</i>        | cg21092324 | 22915     | 4  | 1stExon         | Open sea | -3.829E-01 | 4.659E-11 |
| <i>MRGPRX1</i>      | cg23001457 | 259249    | 11 | 1stExon         | Open sea | -3.368E-01 | 3.111E-06 |
| <i>MSC</i>          | cg06269753 | 9242      | 8  | Gene body       | Island   | 3.102E-01  | 3.147E-04 |
| <i>MSC</i>          | cg23710218 | 9242      | 8  | 1stExon/5'UTR   | Island   | 3.761E-01  | 1.386E-07 |
| <i>MSX1</i>         | cg09748975 | 4487      | 4  | Gene body       | Island   | 3.316E-01  | 7.703E-09 |
| <i>MYBPH</i>        | cg18959422 | 4608      | 1  | TSS1500         | Open sea | -3.153E-01 | 4.293E-08 |
| <i>MYCBP</i>        | cg12792157 | 26292     | 1  | 5'UTR/1stExon   | Island   | -4.253E-01 | 2.474E-23 |
| <i>MYCT1</i>        | cg02830467 | 80177     | 6  | TSS1500         | Open sea | -3.341E-01 | 2.292E-07 |
| <i>MYO3A</i>        | cg08441170 | 53904     | 10 | 1stExon/5'UTR   | Island   | 3.173E-01  | 1.962E-02 |
| <i>MYO3A</i>        | cg23771603 | 53904     | 10 | 5'UTR           | Island   | 3.690E-01  | 1.845E-03 |
| <i>NALCN</i>        | cg15202954 | 259232    | 13 | TSS200          | Island   | 3.547E-01  | 1.612E-03 |
| <i>NAT8L</i>        | cg21269934 | 339983    | 4  | TSS1500         | Island   | 3.108E-01  | 1.106E-03 |
| <i>NAV1</i>         | cg25167447 | 89796     | 1  | TSS1500         | Island   | 3.407E-01  | 9.994E-06 |
| <i>NCAPH</i>        | cg01906055 | 23397     | 2  | TSS1500         | N-Shore  | -3.446E-01 | 8.756E-12 |
| <i>NEFM</i>         | cg23290344 | 4741      | 8  | TSS1500/1stExon | Island   | 3.478E-01  | 8.869E-08 |
| <i>NEUROG1</i>      | cg04330449 | 4762      | 5  | 1stExon         | Island   | 3.775E-01  | 2.848E-05 |
| <i>NEUROG1</i>      | cg04897683 | 4762      | 5  | 5'UTR/1stExon   | Island   | 3.294E-01  | 8.357E-03 |
| <i>NHLH2</i>        | cg22427279 | 4808      | 1  | TSS1500         | S-Shelf  | -3.522E-01 | 2.130E-09 |
| <i>NID2</i>         | cg22881914 | 22795     | 14 | TSS1500         | Island   | 3.550E-01  | 9.343E-03 |
| <i>NIPSNAP1</i>     | cg13797031 | 8508      | 22 | TSS1500         | S-Shore  | -3.676E-01 | 1.864E-05 |
| <i>NKX2-2</i>       | cg17029168 | 4821      | 20 | 5'UTR/1stExon   | Island   | 3.088E-01  | 2.685E-03 |
| <i>NKX6-2</i>       | cg08441806 | 84504     | 10 | 1stExon         | Island   | 3.080E-01  | 1.259E-05 |
| <i>NLGN2</i>        | cg15660077 | 57555     | 17 | 1stExon         | N-Shore  | 3.144E-01  | 9.438E-09 |
| <i>NLRP12</i>       | cg25866075 | 91662     | 19 | TSS200          | Open sea | -3.059E-01 | 4.134E-08 |
| <i>NPR2</i>         | cg12876594 | 4882      | 9  | TSS1500         | Island   | 3.931E-01  | 1.998E-14 |
| <i>NPR2</i>         | cg24194775 | 4882      | 9  | TSS1500         | N-Shore  | 4.434E-01  | 3.270E-13 |
| <i>NPTX2</i>        | cg00548268 | 4885      | 7  | TSS1500         | Island   | 3.463E-01  | 5.662E-12 |
| <i>NTM</i>          | cg20881910 | 50863     | 11 | TSS1500         | Island   | 3.460E-01  | 2.026E-03 |

|                  |            |          |    |                         |          |            |           |
|------------------|------------|----------|----|-------------------------|----------|------------|-----------|
| <i>NTRK3</i>     | cg14384532 | 4916     | 15 | TSS1500                 | Island   | 3.208E-01  | 9.910E-06 |
| <i>NUDT15</i>    | cg11473104 | 55270    | 13 | TSS200                  | N-Shore  | 3.483E-01  | 2.417E-15 |
| <i>OR10J1</i>    | cg15700197 | 26476    | 1  | TSS1500                 | Open sea | -3.491E-01 | 2.655E-10 |
| <i>OR51B4</i>    | cg06353345 | 79339    | 11 | 1stExon                 | Open sea | -3.644E-01 | 1.302E-06 |
| <i>PAX7</i>      | cg07536847 | 5081     | 1  | TSS1500                 | Island   | 3.088E-01  | 6.407E-05 |
| <i>PAX7</i>      | cg11428724 | 5081     | 1  | 5'UTR/1stExon           | Island   | 3.930E-01  | 1.153E-03 |
| <i>PCDH7</i>     | cg12629325 | 56141    | 5  | Gene body               | Island   | 4.173E-01  | 3.352E-03 |
| <i>PCDHAC1</i>   | cg12629325 | 56135    | 5  | 1stExon/5'UTR           | Island   | 4.173E-01  | 3.352E-03 |
| <i>PDE10A</i>    | cg24133115 | 10846    | 6  | 5'UTR/1stExon           | Island   | 3.442E-01  | 6.214E-03 |
| <i>PIPOX</i>     | cg06144905 | 51268    | 17 | TSS200                  | Open sea | -3.319E-01 | 3.362E-09 |
| <i>PKDREJ</i>    | cg11377136 | 10343    | 22 | 1stExon                 | Island   | 4.230E-01  | 6.872E-06 |
| <i>PKP2</i>      | cg03302287 | 5318     | 12 | 1stExon                 | Island   | -3.532E-01 | 1.081E-15 |
| <i>PLD5</i>      | cg01664666 | 200150   | 1  | 5'UTR                   | Island   | 3.092E-01  | 2.099E-03 |
| <i>PLEKHF1</i>   | cg05512099 | 79156    | 19 | TSS1500                 | N-Shore  | -4.176E-01 | 7.820E-12 |
| <i>POU3F3</i>    | cg20291049 | 5455     | 2  | 1stExon                 | Island   | 3.415E-01  | 3.322E-05 |
| <i>POU4F2</i>    | cg24199834 | 5458     | 4  | 1stExon/5'UTR           | Island   | 3.448E-01  | 8.381E-09 |
| <i>PRAC</i>      | cg12374721 | 84366    | 17 | Gene body               | N-Shore  | 4.176E-01  | 1.515E-06 |
| <i>PRG2</i>      | cg15357945 | 5553     | 11 | TSS1500                 | Open sea | -3.025E-01 | 2.846E-09 |
| <i>PRKAR1B</i>   | cg13577076 | 5575     | 7  | 5'UTR/TSS1500           | S-Shore  | 4.038E-01  | 2.100E-03 |
| <i>PSME2</i>     | cg05874478 | 5721     | 14 | 1stExon                 | N-Shore  | -3.268E-01 | 6.366E-25 |
| <i>PTH2R</i>     | cg25057743 | 5746     | 2  | TSS200                  | Island   | 3.273E-01  | 5.501E-05 |
| <i>PTPN20A</i>   | cg02222362 | 26095    | 10 | TSS200                  | Island   | 3.151E-01  | 3.758E-08 |
| <i>PTPN20B</i>   | cg02222362 | 26095    | 10 | TSS200/TSS1500          | Island   | 3.151E-01  | 3.758E-08 |
| <i>PTPRT</i>     | cg13168820 | 11122    | 20 | 1stExon                 | Island   | 3.373E-01  | 3.996E-03 |
| <i>PXDN</i>      | cg12164282 | 7837     | 2  | 1stExon                 | Island   | 4.703E-01  | 2.486E-15 |
| <i>PXDN</i>      | cg14037665 | 7837     | 2  | TSS1500                 | Island   | 3.501E-01  | 4.495E-05 |
| <i>PYCARD</i>    | cg12100791 | 29108    | 16 | TSS200                  | S-Shore  | -3.139E-01 | 4.424E-08 |
| <i>RELN</i>      | cg17923358 | 5649     | 7  | 1stExon                 | Island   | 3.345E-01  | 3.920E-03 |
| <i>RGS6</i>      | cg03188118 | 9628     | 14 | 5'UTR/1stExon           | S-Shore  | 3.503E-01  | 4.895E-07 |
| <i>RIMBP2</i>    | cg24272907 | 23504    | 12 | TSS1500                 | Open sea | -3.447E-01 | 5.141E-08 |
| <i>RNF207</i>    | cg00030047 | 388591   | 1  | Gene body               | N-Shore  | 3.543E-01  | 5.246E-09 |
| <i>RNF217</i>    | cg24298280 | 154214   | 6  | 5'UTR                   | Open sea | -3.014E-01 | 1.621E-03 |
| <i>RNF31</i>     | cg05874478 | 55072    | 14 | TSS1500                 | N-Shore  | -3.268E-01 | 6.366E-25 |
| <i>RPL36</i>     | cg25136310 | 25873    | 19 | 1stExon/Gene body       | Island   | -3.203E-01 | 3.540E-35 |
| <i>RUNX3</i>     | cg03171924 | 864      | 1  | Gene body               | Island   | 3.626E-01  | 8.562E-14 |
| <i>RUNX3</i>     | cg24019564 | 864      | 1  | TSS1500/Gene body       | Island   | 3.073E-01  | 2.443E-04 |
| <i>RYR2</i>      | cg11657808 | 6262     | 1  | Gene body               | Island   | 4.550E-01  | 1.805E-05 |
| <i>S100A8</i>    | cg20070090 | 6279     | 1  | 5'UTR                   | Open sea | -3.268E-01 | 1.640E-05 |
| <i>SALL3</i>     | cg15191648 | 27164    | 18 | TSS200                  | Island   | 3.302E-01  | 1.537E-08 |
| <i>SARM1</i>     | cg23887396 | 23098    | 17 | Gene body               | Island   | 3.122E-01  | 3.315E-02 |
| <i>SCARF2</i>    | cg14785479 | 91179    | 22 | TSS1500                 | Island   | 3.541E-01  | 1.294E-02 |
| <i>SCNN1B</i>    | cg23113963 | 6338     | 16 | TSS1500                 | Island   | 3.803E-01  | 2.594E-03 |
| <i>SEC31B</i>    | cg20831708 | 25956    | 10 | 5'UTR                   | Island   | 3.605E-01  | 1.578E-06 |
| <i>SEPT1</i>     | cg19663795 | 41982859 | 16 | 5'UTR                   | S-Shelf  | -3.017E-01 | 7.369E-09 |
| <i>SERPINB10</i> | cg23696618 | 5273     | 18 | Gene body               | Open sea | -3.347E-01 | 7.093E-06 |
| <i>SFRP1</i>     | cg13398291 | 6422     | 8  | 1stExon                 | Island   | 3.663E-01  | 7.736E-04 |
| <i>SFRP1</i>     | cg15839448 | 6422     | 8  | 1stExon                 | Island   | 3.541E-01  | 9.704E-08 |
| <i>SFRP1</i>     | cg22418909 | 6422     | 8  | 1stExon/5'UTR           | Island   | 3.776E-01  | 4.450E-09 |
| <i>SH3GL3</i>    | cg22946150 | 6457     | 15 | Gene body/1stExon/5'UTR | Island   | 3.705E-01  | 1.242E-03 |
| <i>SIRPB1</i>    | cg09577651 | 10326    | 20 | TSS200                  | Open sea | -3.188E-01 | 2.466E-08 |
| <i>SIX6</i>      | cg19456540 | 4990     | 14 | 1stExon                 | Island   | 3.421E-01  | 1.443E-03 |
| <i>SLAMF7</i>    | cg07837085 | 57823    | 1  | TSS200                  | Open sea | -3.651E-01 | 1.545E-10 |
| <i>SLAMF9</i>    | cg09737668 | 89886    | 1  | Gene body               | Open sea | 3.064E-01  | 8.818E-14 |
| <i>SLC12A5</i>   | cg22752533 | 57468    | 20 | 1stExon/5'UTR/Gene body | Island   | 3.306E-01  | 4.350E-07 |
| <i>SLC16A12</i>  | cg09186006 | 387700   | 10 | 1stExon/5'UTR           | Island   | 3.726E-01  | 1.986E-03 |
| <i>SLC16A12</i>  | cg12005098 | 387700   | 10 | TSS200                  | Island   | 3.625E-01  | 3.657E-02 |
| <i>SLC18A3</i>   | cg11389172 | 6572     | 10 | TSS200                  | Island   | 3.352E-01  | 2.141E-03 |
| <i>SLC22A12</i>  | cg07220939 | 116085   | 11 | 1stExon/5'UTR           | Open sea | -3.830E-01 | 1.646E-04 |
| <i>SLC22A18</i>  | cg03336167 | 5002     | 11 | Gene body               | Island   | 4.780E-01  | 7.285E-09 |
| <i>SLC26A3</i>   | cg04996020 | 1811     | 7  | TSS1500                 | Open sea | -3.425E-01 | 1.097E-06 |
| <i>SLC26A4</i>   | cg14646244 | 5172     | 7  | TSS1500                 | N-Shore  | -3.555E-01 | 3.214E-10 |
| <i>SLC30A8</i>   | cg23338195 | 169026   | 8  | TSS1500                 | Open sea | -3.507E-01 | 2.536E-04 |
| <i>SLC35F3</i>   | cg25437385 | 148641   | 1  | 1stExon                 | Island   | 3.964E-01  | 1.123E-02 |

|           |            |        |    |                       |          |            |           |
|-----------|------------|--------|----|-----------------------|----------|------------|-----------|
| SLC3A1    | cg02192965 | 6519   | 2  | 1stExon               | Open sea | -3.374E-01 | 4.406E-05 |
| SLC6A18   | cg19421752 | 348932 | 5  | TSS1500               | N-Shore  | -3.220E-01 | 2.434E-07 |
| SLC6A19   | cg19421752 | 340024 | 5  | 3'UTR                 | N-Shore  | -3.220E-01 | 2.434E-07 |
| SLC6A2    | cg04490714 | 6530   | 16 | 1stExon/5'UTR         | Island   | 3.548E-01  | 2.360E-04 |
| SLC6A2    | cg10362591 | 6530   | 16 | TSS1500               | Island   | 3.397E-01  | 2.009E-02 |
| SLCO1B1   | cg00995065 | 10599  | 12 | TSS1500               | Open sea | -3.187E-01 | 5.297E-08 |
| SLITRK5   | cg09083627 | 26050  | 13 | TSS1500               | Island   | 4.568E-01  | 5.506E-12 |
| SNAP91    | cg21688264 | 9892   | 6  | Gene body/5'UTR       | Island   | 3.660E-01  | 2.692E-03 |
| SND1      | cg15087147 | 27044  | 7  | Gene body             | Island   | 3.207E-01  | 5.275E-04 |
| SORCS3    | cg16787600 | 22986  | 10 | 1stExon/5'UTR         | Island   | 4.114E-01  | 2.294E-04 |
| SOX1      | cg06675478 | 6656   | 13 | TSS200                | Island   | 3.064E-01  | 1.269E-15 |
| SOX11     | cg20008332 | 6664   | 2  | 1stExon               | Island   | 4.188E-01  | 8.517E-09 |
| SPATA16   | cg06577725 | 83893  | 3  | 1stExon/5'UTR         | Open sea | -3.119E-01 | 3.001E-03 |
| SPATA17   | cg01727899 | 128153 | 1  | Gene body             | S-Shore  | -3.546E-01 | 3.391E-10 |
| SPATA19   | cg18457737 | 219938 | 11 | Gene body             | Open sea | -3.370E-01 | 2.333E-09 |
| SRBD1     | cg02630207 | 55133  | 2  | TSS1500               | S-Shore  | -3.049E-01 | 4.559E-07 |
| SRD5A2    | cg19502744 | 6716   | 2  | 1stExon               | Island   | 3.308E-01  | 1.001E-05 |
| SST       | cg02164046 | 6750   | 3  | 1stExon/5'UTR         | Island   | 3.316E-01  | 1.596E-05 |
| SSTR4     | cg17586860 | 6754   | 20 | TSS200                | Island   | 3.629E-01  | 3.419E-05 |
| ST6GAL2   | cg04434339 | 84620  | 2  | 1stExon/5'UTR         | Island   | 3.158E-01  | 1.539E-02 |
| STK38     | cg02964385 | 11329  | 6  | TSS1500               | S-Shore  | -4.034E-01 | 2.682E-08 |
| SYN3      | cg16894211 | 8224   | 22 | TSS1500/5'UTR         | Open sea | -3.466E-01 | 4.023E-05 |
| SYT9      | cg08185661 | 143425 | 11 | 1stExon               | Island   | 3.421E-01  | 2.724E-02 |
| TCP10L    | cg20857253 | 140290 | 21 | 5'UTR                 | Open sea | -3.434E-01 | 1.924E-07 |
| TERF2IP   | cg08585897 | 54386  | 16 | TSS1500               | N-Shore  | -3.063E-01 | 1.280E-06 |
| TEX15     | cg20939319 | 56154  | 8  | TSS1500               | Open sea | -3.047E-01 | 1.916E-04 |
| TFPI2     | cg23141855 | 7980   | 7  | Gene body             | Island   | 3.293E-01  | 8.845E-03 |
| TLX3      | cg25720804 | 30012  | 5  | 1stExon               | Island   | 3.910E-01  | 3.677E-06 |
| TM6SF1    | cg14696396 | 53346  | 15 | 1stExon               | Island   | 4.029E-01  | 3.574E-08 |
| TMEM116   | cg26789453 | 89894  | 12 | TSS1500               | S-Shore  | -3.719E-01 | 1.148E-11 |
| TMEM132E  | cg18338311 | 124842 | 17 | 1stExon/5'UTR         | Island   | 3.257E-01  | 1.754E-02 |
| TMEM90B   | cg16098981 | 79953  | 20 | 5'UTR/1stExon         | Island   | 3.063E-01  | 3.579E-03 |
| TMPRSS11F | cg02936740 | 389208 | 4  | TSS1500               | Open sea | -3.335E-01 | 2.431E-05 |
| TNFRSF10A | cg26530341 | 8797   | 8  | TSS1500               | S-Shore  | -3.710E-01 | 3.175E-08 |
| TOX2      | cg11319389 | 84969  | 20 | TSS200/Gene body      | Island   | 3.247E-01  | 4.090E-04 |
| TPM3      | cg12205230 | 7170   | 1  | TSS1500               | Open sea | -3.097E-01 | 4.575E-07 |
| TPSD1     | cg01375871 | 23430  | 16 | TSS1500               | N-Shelf  | -3.008E-01 | 1.242E-04 |
| TRDN      | cg14462830 | 10345  | 6  | TSS1500               | Open sea | -3.180E-01 | 7.783E-07 |
| TREML2    | cg19005210 | 79865  | 6  | TSS200                | Open sea | -3.839E-01 | 4.382E-07 |
| TRH       | cg01009664 | 7200   | 3  | 5'UTR/1stExon         | Island   | 4.040E-01  | 4.487E-10 |
| TRHR      | cg22268164 | 7201   | 8  | 1stExon               | Open sea | -3.359E-01 | 2.479E-03 |
| TRHR      | cg26989103 | 7201   | 8  | TSS200                | Open sea | -3.682E-01 | 1.159E-05 |
| TRIM17    | cg23540518 | 51127  | 1  | 1stExon/5'UTR         | Island   | 3.030E-01  | 3.021E-03 |
| TRIM31    | cg00679556 | 11074  | 6  | 5'UTR                 | Open sea | -3.342E-01 | 7.659E-09 |
| TRIM31    | cg15238224 | 11074  | 6  | TSS1500               | Open sea | -3.134E-01 | 5.492E-12 |
| TRIM40    | cg09196959 | 135644 | 6  | TSS200                | Open sea | -3.767E-01 | 1.678E-15 |
| TRIM58    | cg07533148 | 25893  | 1  | 1stExon               | Island   | 4.022E-01  | 9.417E-10 |
| TRIM63    | cg13998293 | 84676  | 1  | TSS1500               | Open sea | -3.026E-01 | 8.229E-08 |
| TRPM2     | cg08191854 | 7226   | 21 | TSS200                | Open sea | -3.824E-01 | 4.665E-12 |
| TSGA13    | cg02332073 | 114960 | 7  | TSS1500               | Open sea | -3.004E-01 | 9.956E-06 |
| TSPAN32   | cg00041575 | 10077  | 11 | TSS1500               | Open sea | -3.862E-01 | 5.789E-13 |
| TUBB8     | cg26675077 | 347688 | 10 | TSS1500/1stExon/5'UTR | S-Shore  | 3.217E-01  | 1.045E-20 |
| TWIST1    | cg20052718 | 7291   | 7  | 1stExon               | Island   | 3.559E-01  | 1.009E-04 |
| TWIST1    | cg24446548 | 7291   | 7  | 1stExon/5'UTR         | Island   | 4.862E-01  | 2.002E-03 |
| UCN       | cg04527918 | 7349   | 2  | TSS200                | Island   | 4.052E-01  | 1.140E-11 |
| UNC5C     | cg13265789 | 8633   | 4  | TSS1500               | Island   | 3.295E-01  | 3.502E-03 |
| UTF1      | cg03755123 | 8433   | 10 | TSS1500               | Island   | 3.618E-01  | 1.623E-06 |
| UTF1      | cg09053680 | 8433   | 10 | 1stExon               | Island   | 3.713E-01  | 3.644E-03 |
| VHL       | cg16869108 | 7428   | 3  | Gene body             | S-Shore  | -3.007E-01 | 3.984E-08 |
| VHL       | cg24092914 | 7428   | 3  | Gene body             | S-Shore  | -4.606E-01 | 1.064E-08 |
| VIM       | cg12874092 | 7431   | 10 | Gene body             | Island   | 4.075E-01  | 9.469E-03 |
| VIPR2     | cg18349835 | 7434   | 7  | Gene body             | Island   | 4.125E-01  | 5.053E-04 |
| VNN1      | cg00852964 | 8876   | 6  | 1stExon               | Open sea | -3.437E-01 | 1.883E-07 |



|         |            |        |    |               |          |            |           |
|---------|------------|--------|----|---------------|----------|------------|-----------|
| VNN1    | cg02184413 | 8876   | 6  | TSS200        | Open sea | -3.187E-01 | 5.002E-05 |
| VSTM1   | cg12315311 | 284415 | 19 | TSS1500       | Open sea | -3.546E-01 | 1.129E-13 |
| VSX1    | cg06151165 | 30813  | 20 | Gene body     | Island   | 3.429E-01  | 2.837E-03 |
| VT1A    | cg17872476 | 143187 | 10 | TSS1500       | N-Shore  | -3.080E-01 | 1.418E-07 |
| WBSCR17 | cg01366419 | 64409  | 7  | TSS1500       | Island   | 3.223E-01  | 5.277E-05 |
| WDR86   | cg24068372 | 349136 | 7  | TSS200        | Island   | 3.229E-01  | 3.589E-02 |
| WDR88   | cg26687173 | 126248 | 19 | 1stExon       | Island   | 3.213E-01  | 2.895E-15 |
| WIPI2   | cg20592700 | 26100  | 7  | 1stExon       | Island   | -3.386E-01 | 2.039E-30 |
| WT1     | cg01693350 | 7490   | 11 | Gene body     | Island   | 3.709E-01  | 7.921E-10 |
| WT1     | cg13641903 | 7490   | 11 | Gene body     | Island   | 3.726E-01  | 3.941E-15 |
| ZDHHC6  | cg17872476 | 64429  | 10 | 5'UTR         | N-Shore  | -3.080E-01 | 1.418E-07 |
| ZNF135  | cg16638540 | 7694   | 19 | TSS200        | Island   | 3.588E-01  | 1.381E-10 |
| ZNF148  | cg15705999 | 7707   | 3  | 5'UTR         | Island   | -3.384E-01 | 8.801E-24 |
| ZNF154  | cg08668790 | 7710   | 19 | TSS200        | S-Shore  | 3.338E-01  | 4.393E-03 |
| ZNF154  | cg21790626 | 7710   | 19 | 5'UTR/1stExon | Island   | 4.224E-01  | 6.607E-05 |
| ZNF22   | cg00899659 | 7570   | 10 | TSS1500       | N-Shore  | -3.360E-01 | 6.978E-05 |
| ZNF454  | cg03355526 | 285676 | 5  | 5'UTR         | Island   | 3.256E-01  | 2.716E-07 |
| ZNF454  | cg23037403 | 285676 | 5  | TSS200        | Island   | 3.130E-01  | 7.497E-08 |
| ZNF540  | cg03975694 | 163255 | 19 | 5'UTR/1stExon | S-Shelf  | 3.173E-01  | 3.758E-07 |
| ZNF540  | cg27389185 | 163255 | 19 | TSS200        | S-Shore  | 3.045E-01  | 7.245E-09 |
| ZNF610  | cg07703337 | 162963 | 19 | 5'UTR/TSS1500 | Open sea | -3.154E-01 | 4.848E-02 |
| ZNF718  | cg15792688 | 255403 | 4  | Gene body     | Island   | -3.452E-01 | 3.965E-18 |
| ZNF781  | cg25875213 | 163115 | 19 | 5'UTR/1stExon | Island   | 3.886E-01  | 2.619E-03 |
| ZSCAN1  | cg21331821 | 284312 | 19 | TSS1500       | Island   | 3.351E-01  | 3.496E-04 |
| NA      | cg13912117 | NA     | 8  | NA            | Island   | 5.344E-01  | 8.729E-10 |

(C) Genes showing significant differences of DNA methylation levels between T and C samples in Cluster B2

| Gene symbol | Probe ID <sup>1</sup> | National Center for Biotechnology Information (NCBI) Gene ID | Chromosome | Gene region <sup>2</sup> | CpG type <sup>3</sup> | $\Delta\beta_{T-C}$ | <i>P</i>  |
|-------------|-----------------------|--------------------------------------------------------------|------------|--------------------------|-----------------------|---------------------|-----------|
| ABCC12      | cg14074641            | 94160                                                        | 16         | TSS1500                  | Open sea              | -4.178E-01          | 6.229E-43 |
| ABCC2       | cg09448875            | 1244                                                         | 10         | TSS200                   | Open sea              | -3.176E-01          | 2.496E-20 |
| ABCC9       | cg20025970            | 10060                                                        | 12         | 1stExon                  | Open sea              | -3.179E-01          | 6.173E-25 |
| ACAT1       | cg24341800            | 38                                                           | 11         | TSS200                   | Island                | 3.033E-01           | 2.558E-48 |
| ACAT2       | cg15298323            | 39                                                           | 6          | TSS1500                  | Island                | 3.070E-01           | 5.089E-12 |
| ACTA1       | cg13547644            | 58                                                           | 1          | 5'UTR                    | Island                | 3.018E-01           | 3.644E-13 |
| ACTL6B      | cg08572611            | 51412                                                        | 7          | Gene body                | Island                | 3.511E-01           | 9.873E-12 |
| ADAM12      | cg11668923            | 8038                                                         | 10         | 1stExon/5'UTR            | Island                | 3.766E-01           | 2.620E-19 |
| ADAM19      | cg07540118            | 8728                                                         | 5          | 1stExon/5'UTR            | Island                | 3.249E-01           | 1.417E-12 |
| ADAM23      | cg16778809            | 8745                                                         | 2          | 1stExon/5'UTR            | Island                | 3.410E-01           | 7.803E-10 |
| ADAMTS1     | cg00472814            | 9510                                                         | 21         | 1stExon/5'UTR            | Island                | 3.450E-01           | 2.138E-16 |
| ADAMTS1     | cg11189837            | 9510                                                         | 21         | TSS1500                  | Island                | 3.343E-01           | 2.353E-14 |
| ADAMTS18    | cg03238797            | 170692                                                       | 16         | 1stExon/5'UTR            | Island                | 3.878E-01           | 6.181E-19 |
| ADAMTS2     | cg14409941            | 9509                                                         | 5          | Gene body                | Island                | 3.869E-01           | 6.612E-18 |
| ADAMTS5     | cg08190291            | 11096                                                        | 21         | TSS200                   | Island                | 3.242E-01           | 5.619E-16 |
| ADCY4       | cg16761581            | 196883                                                       | 14         | 1stExon                  | Island                | 3.284E-01           | 3.918E-15 |
| ADD2        | cg25631352            | 119                                                          | 2          | TSS200                   | S-Shore               | 3.338E-01           | 8.856E-19 |
| ADHFE1      | cg01988129            | 137872                                                       | 8          | Gene body                | Island                | 5.454E-01           | 9.724E-23 |
| ADRB3       | cg17619823            | 155                                                          | 8          | 1stExon                  | Island                | 3.956E-01           | 1.584E-23 |
| AEBP1       | cg02126753            | 165                                                          | 7          | 1stExon/5'UTR            | Open sea              | 3.479E-01           | 1.081E-13 |
| AFF3        | cg06183267            | 3899                                                         | 2          | TSS200                   | Open sea              | -3.391E-01          | 9.516E-14 |
| AGBL4       | cg06744574            | 84871                                                        | 1          | Gene body                | N-Shore               | 3.290E-01           | 5.184E-11 |
| AIM2        | cg10636246            | 9447                                                         | 1          | TSS1500                  | Open sea              | -4.551E-01          | 3.119E-21 |
| AJAP1       | cg17525406            | 55966                                                        | 1          | Gene body                | Island                | 5.041E-01           | 4.273E-26 |
| AJAP1       | cg20959866            | 55966                                                        | 1          | TSS1500                  | Island                | 3.358E-01           | 2.866E-19 |
| AKAP12      | cg01555431            | 9590                                                         | 6          | Gene body                | Island                | 4.217E-01           | 2.093E-20 |
| ALDH1A2     | cg03365437            | 8854                                                         | 15         | 5'UTR/1stExon            | Island                | 3.153E-01           | 1.810E-16 |
| ALDH1A3     | cg21359747            | 220                                                          | 15         | Gene body                | Island                | 3.751E-01           | 3.874E-15 |
| ALK         | cg18277754            | 238                                                          | 2          | 5'UTR/1stExon            | Island                | 3.251E-01           | 1.525E-15 |
| ALX4        | cg04988423            | 60529                                                        | 11         | 1stExon                  | Island                | 3.509E-01           | 9.522E-14 |
| ALX4        | cg26365854            | 60529                                                        | 11         | Gene body                | Island                | 3.342E-01           | 1.933E-16 |
| AMICA1      | cg07376232            | 120425                                                       | 11         | Gene body/TSS1500        | Open sea              | -3.337E-01          | 2.112E-20 |
| AMPH        | cg10293925            | 273                                                          | 7          | 5'UTR                    | Island                | 4.735E-01           | 4.466E-18 |
| ANXA13      | cg02800334            | 312                                                          | 8          | TSS1500                  | Open sea              | -3.315E-01          | 4.986E-30 |

|             |            |        |    |                |          |            |           |
|-------------|------------|--------|----|----------------|----------|------------|-----------|
| AOAH        | cg14451276 | 313    | 7  | 1stExon/5'UTR  | Open sea | -3.039E-01 | 1.029E-11 |
| AQP9        | cg11098259 | 366    | 15 | TSS200         | Open sea | -3.149E-01 | 9.363E-22 |
| ARHGAP15    | cg27365426 | 55843  | 2  | TSS1500        | Open sea | -3.291E-01 | 2.735E-16 |
| ASAM        | cg19096475 | 79827  | 11 | TSS1500        | Island   | 3.089E-01  | 3.459E-18 |
| ATP2B4      | cg22226839 | 493    | 1  | 5'UTR/1stExon  | N-Shelf  | 3.106E-01  | 3.311E-39 |
| ATP8B2      | cg08190044 | 57198  | 1  | 5'UTR          | Island   | 3.552E-01  | 5.740E-11 |
| ATRNL1      | cg04335339 | 26033  | 10 | TSS200         | Island   | 4.014E-01  | 2.794E-14 |
| B3GALT5     | cg11479877 | 10317  | 21 | 1stExon        | Open sea | -3.106E-01 | 1.320E-27 |
| B3GAT1      | cg11038843 | 27087  | 11 | 5'UTR          | Island   | 3.054E-01  | 7.803E-13 |
| BAALC       | cg10918202 | 79870  | 8  | 1stExon        | Island   | 4.070E-01  | 2.382E-21 |
| BATF        | cg15645309 | 10538  | 14 | TSS200         | Open sea | -3.033E-01 | 4.533E-12 |
| BCAN        | cg21475402 | 63827  | 1  | 5'UTR          | Island   | 3.149E-01  | 5.952E-15 |
| BEND5       | cg06744574 | 79656  | 1  | 1stExon        | N-Shore  | 3.290E-01  | 5.184E-11 |
| BLNK        | cg16779976 | 29760  | 10 | 1stExon        | Open sea | -3.414E-01 | 3.995E-13 |
| BMP3        | cg01049530 | 651    | 4  | TSS200         | Island   | 3.661E-01  | 1.483E-13 |
| BNC1        | cg10398682 | 646    | 15 | Gene body      | Island   | 3.072E-01  | 8.162E-19 |
| BNC1        | cg18952647 | 646    | 15 | TSS1500        | Island   | 4.215E-01  | 1.250E-20 |
| BNC2        | cg14613546 | 54796  | 9  | Gene body      | S-Shore  | -3.008E-01 | 1.064E-26 |
| BOLL        | cg17560332 | 66037  | 2  | TSS1500        | Island   | 3.165E-01  | 2.790E-24 |
| BPI         | cg08254089 | 671    | 20 | Gene body      | Open sea | -3.433E-01 | 3.463E-24 |
| BPTF        | cg16435601 | 2186   | 17 | 1stExon        | S-Shore  | -3.657E-01 | 2.188E-18 |
| BTG4        | cg22879515 | 54766  | 11 | TSS1500        | Island   | 3.670E-01  | 7.990E-13 |
| BTG4        | cg23211240 | 54766  | 11 | TSS1500        | Island   | 3.101E-01  | 1.603E-14 |
| BVES        | cg20624391 | 11149  | 6  | 5'UTR/1stExon  | Island   | 3.032E-01  | 1.145E-18 |
| C10orf25    | cg00899659 | 220979 | 10 | Gene body      | N-Shore  | -3.269E-01 | 2.609E-19 |
| C10orf72    | cg02569613 | 196740 | 10 | Gene body      | N-Shore  | 3.010E-01  | 1.856E-16 |
| C11orf21    | cg00041575 | 29125  | 11 | Gene body      | Open sea | -3.699E-01 | 1.016E-18 |
| C14orf162   | cg14912575 | 56936  | 14 | TSS1500        | Island   | 3.051E-01  | 2.438E-20 |
| C14orf93    | cg03565081 | 60686  | 14 | 5'UTR          | N-Shore  | -3.164E-01 | 3.361E-22 |
| C17orf93    | cg12374721 | 360205 | 17 | TSS1500        | N-Shore  | 4.322E-01  | 5.743E-20 |
| C18orf20    | cg10054857 | 221241 | 18 | TSS1500        | Open sea | -3.130E-01 | 2.091E-21 |
| C1orf150    | cg05767404 | 148823 | 1  | Gene body      | Open sea | -3.357E-01 | 2.821E-23 |
| C1orf158    | cg24338843 | 93190  | 1  | Gene body      | Open sea | -3.419E-01 | 1.905E-26 |
| C1orf59     | cg00328227 | 113802 | 1  | TSS200/TSS1500 | Island   | -3.219E-01 | 6.637E-24 |
| C21orf121   | cg18963171 | 150142 | 21 | Gene body      | Open sea | -3.164E-01 | 4.701E-28 |
| C8orf56     | cg10918202 | 157556 | 8  | 1stExon        | Island   | 4.070E-01  | 2.382E-21 |
| CACNB2      | cg01805540 | 783    | 10 | 1stExon        | Island   | 4.490E-01  | 4.089E-17 |
| CASP8       | cg26799474 | 841    | 2  | 5'UTR          | Open sea | -3.375E-01 | 1.432E-19 |
| CBLN4       | cg25993718 | 140689 | 20 | TSS200         | Island   | 3.108E-01  | 2.713E-16 |
| CCDC106     | cg12582959 | 29903  | 19 | 5'UTR/1stExon  | N-Shore  | 3.017E-01  | 1.241E-15 |
| CCDC141     | cg12501949 | 285025 | 2  | TSS1500        | Open sea | -3.251E-01 | 6.956E-28 |
| CCDC27      | cg08670691 | 148870 | 1  | TSS200         | Open sea | -3.049E-01 | 1.338E-27 |
| CCDC3       | cg22750254 | 83643  | 10 | 1stExon        | Island   | 3.034E-01  | 1.425E-09 |
| CCDC37      | cg00891278 | 348807 | 3  | 1stExon/5'UTR  | Island   | 3.564E-01  | 3.912E-19 |
| CCDC37      | cg20312228 | 348807 | 3  | TSS200         | Island   | 3.250E-01  | 1.355E-21 |
| CCKAR       | cg04353483 | 886    | 4  | TSS1500        | Open sea | -3.101E-01 | 1.157E-20 |
| CCL14-CCL15 | cg23743114 | NA     | 17 | Gene body      | Open sea | -4.137E-01 | 8.192E-28 |
| CCL15       | cg23743114 | 6359   | 17 | Gene body      | Open sea | -4.137E-01 | 8.192E-28 |
| CCL7        | cg02936263 | 6354   | 17 | TSS1500        | Open sea | -3.134E-01 | 9.004E-26 |
| CCNA1       | cg12571423 | 8900   | 13 | 5'UTR          | S-Shore  | 3.026E-01  | 3.518E-16 |
| CD1B        | cg04574507 | 910    | 1  | Gene body      | Open sea | -3.288E-01 | 1.508E-21 |
| CD1C        | cg07548313 | 911    | 1  | Gene body      | Open sea | -3.054E-01 | 2.073E-20 |
| CD2         | cg16719404 | 914    | 1  | TSS1500        | Open sea | -3.286E-01 | 3.483E-21 |
| CD209       | cg07608333 | 30835  | 19 | TSS1500        | Open sea | -4.102E-01 | 6.438E-38 |
| CD300E      | cg04995095 | 342510 | 17 | Gene body      | Open sea | -3.459E-01 | 6.778E-27 |
| CD300LB     | cg10523494 | 124599 | 17 | TSS1500        | Open sea | -3.160E-01 | 1.236E-29 |
| CD37        | cg10037005 | 951    | 19 | TSS200         | N-Shelf  | -3.919E-01 | 6.795E-24 |
| CD38        | cg26043257 | 952    | 4  | 1stExon        | Island   | 3.011E-01  | 5.215E-11 |
| CD53        | cg22325572 | 963    | 1  | 5'UTR          | Open sea | -3.781E-01 | 1.800E-18 |
| CD5L        | cg01637734 | 922    | 1  | Gene body      | Open sea | -3.160E-01 | 1.312E-16 |
| CD8A        | cg17108819 | 925    | 2  | 5'UTR/1stExon  | Island   | 3.647E-01  | 1.289E-14 |
| CDH11       | cg10065825 | 1009   | 16 | TSS1500        | Island   | 3.216E-01  | 4.939E-13 |
| CDH13       | cg00806490 | 1012   | 16 | Gene body      | Island   | 3.225E-01  | 1.131E-16 |

|          |            |           |    |               |          |            |           |
|----------|------------|-----------|----|---------------|----------|------------|-----------|
| CDH18    | cg27043873 | 1016      | 5  | 5'UTR         | Open sea | -3.639E-01 | 4.404E-24 |
| CDH2     | cg09313439 | 1000      | 18 | 1stExon/5'UTR | Island   | 3.031E-01  | 5.716E-19 |
| CDH8     | cg11323198 | 1006      | 16 | 5'UTR         | Island   | 3.183E-01  | 1.473E-13 |
| CDO1     | cg12880658 | 1036      | 5  | 1stExon/5'UTR | Island   | 3.457E-01  | 3.128E-19 |
| CEBPG    | cg15046693 | 1054      | 19 | TSS1500       | N-Shore  | -3.141E-01 | 1.656E-16 |
| CECR4    | cg22815534 | 100130717 | 22 | Gene body     | Open sea | -3.225E-01 | 4.775E-23 |
| CECR5    | cg22815534 | 27440     | 22 | TSS200        | Open sea | -3.225E-01 | 4.775E-23 |
| CELSR1   | cg06268694 | 9620      | 22 | 1stExon       | Island   | 3.748E-01  | 1.179E-13 |
| CENPP    | cg24105685 | 401541    | 9  | Gene body     | Open sea | -3.049E-01 | 6.748E-18 |
| CHAT     | cg11389172 | 1103      | 10 | 5'UTR         | Island   | 3.860E-01  | 2.751E-14 |
| CHAT     | cg14008883 | 1103      | 10 | 5'UTR         | Island   | 3.077E-01  | 2.107E-20 |
| CHRNA3   | cg04603031 | 1136      | 15 | 5'UTR         | Island   | 3.021E-01  | 1.885E-11 |
| CHRNA6   | cg07906724 | 8973      | 8  | TSS1500       | Open sea | -4.031E-01 | 1.641E-17 |
| CHST2    | cg00995327 | 9435      | 3  | 5'UTR/1stExon | Island   | 3.101E-01  | 5.042E-09 |
| CLEC2D   | cg12810837 | 29121     | 12 | TSS200        | Open sea | -3.964E-01 | 9.932E-27 |
| CLRN3    | cg23817637 | 119467    | 10 | TSS1500       | Open sea | -3.234E-01 | 1.787E-27 |
| CLSTN2   | cg08853659 | 64084     | 3  | 1stExon       | Island   | 3.430E-01  | 1.080E-10 |
| CMTM2    | cg01683883 | 146225    | 16 | TSS1500       | Island   | 3.051E-01  | 3.298E-19 |
| CNIH3    | cg00290506 | 149111    | 1  | 1stExon/5'UTR | Island   | 3.563E-01  | 2.242E-15 |
| CNR1     | cg23276695 | 1268      | 6  | 5'UTR         | Open sea | -3.847E-01 | 2.024E-28 |
| CNRIP1   | cg07080358 | 25927     | 2  | 1stExon       | Island   | 4.689E-01  | 9.648E-23 |
| COL15A1  | cg19461644 | 1306      | 9  | Gene body     | Island   | 3.451E-01  | 7.310E-19 |
| COL23A1  | cg10730712 | 91522     | 5  | TSS1500       | S-Shore  | 3.265E-01  | 2.242E-12 |
| COL4A1   | cg27546237 | 1282      | 13 | TSS1500       | Island   | 3.624E-01  | 2.651E-21 |
| COL4A2   | cg27546237 | 1284      | 13 | Gene body     | Island   | 3.624E-01  | 2.651E-21 |
| COLEC12  | cg19461621 | 81035     | 18 | TSS1500       | S-Shore  | 3.301E-01  | 2.695E-15 |
| COX7B2   | cg25463409 | 170712    | 4  | 5'UTR         | Open sea | -3.157E-01 | 1.043E-28 |
| CPA3     | cg24290574 | 1359      | 3  | 1stExon       | Open sea | -4.209E-01 | 3.436E-24 |
| CPA4     | cg19690404 | 51200     | 7  | Gene body     | Open sea | -3.185E-01 | 8.720E-18 |
| CPB2     | cg14662172 | 1361      | 13 | 1stExon       | Open sea | -3.668E-01 | 7.756E-23 |
| CPE      | cg02886284 | 1363      | 4  | 5'UTR/1stExon | Island   | 3.152E-01  | 1.813E-12 |
| CRHR2    | cg14896516 | 1395      | 7  | TSS1500       | Island   | 3.498E-01  | 1.979E-15 |
| CRISPLD1 | cg05624932 | 83690     | 8  | 5'UTR         | S-Shore  | 3.600E-01  | 3.712E-13 |
| CRMP1    | cg03544320 | 1400      | 4  | 1stExon       | Island   | 4.251E-01  | 1.029E-06 |
| CRTAM    | cg10977115 | 56253     | 11 | Gene body     | Open sea | -3.049E-01 | 6.562E-23 |
| CSMD1    | cg22619018 | 64478     | 8  | TSS1500       | Island   | 4.574E-01  | 1.234E-18 |
| CSNK1A1L | cg01668383 | 122011    | 13 | 1stExon/5'UTR | Open sea | -3.006E-01 | 1.449E-29 |
| CST7     | cg11804789 | 8530      | 20 | TSS200        | Open sea | -4.290E-01 | 7.445E-22 |
| CSTL1    | cg20171451 | 128817    | 20 | TSS1500       | Open sea | 3.427E-01  | 8.163E-33 |
| CTNNA3   | cg00132141 | 29119     | 10 | TSS1500       | Open sea | -3.298E-01 | 8.830E-27 |
| CUX2     | cg09229912 | 23316     | 12 | 1stExon/5'UTR | Island   | 4.656E-01  | 1.202E-25 |
| CUX2     | cg17190608 | 23316     | 12 | TSS1500       | Island   | 3.180E-01  | 8.547E-15 |
| CXCR1    | cg13519373 | 3577      | 2  | 5'UTR         | Open sea | -3.886E-01 | 6.930E-25 |
| DBC1     | cg25935911 | 1620      | 9  | TSS1500       | S-Shore  | 3.184E-01  | 7.079E-20 |
| DCC      | cg01839464 | 1630      | 18 | Gene body     | Island   | 3.175E-01  | 3.838E-13 |
| DCD      | cg25372195 | 117159    | 12 | TSS200        | Open sea | -3.394E-01 | 8.243E-27 |
| DEFB118  | cg20312687 | 117285    | 20 | Gene body     | Open sea | -3.145E-01 | 2.962E-20 |
| DES      | cg18182399 | 1674      | 2  | 1stExon/5'UTR | N-Shore  | 3.293E-01  | 9.416E-12 |
| DGKI     | cg06277657 | 9162      | 7  | TSS1500       | Island   | 3.354E-01  | 9.222E-19 |
| DLK1     | cg17412258 | 8788      | 14 | TSS1500       | Island   | 3.466E-01  | 3.829E-20 |
| DLX5     | cg11997899 | 1749      | 7  | TSS200        | Island   | 3.020E-01  | 1.533E-22 |
| DMBX1    | cg09914444 | 127343    | 1  | TSS1500       | Open sea | -3.942E-01 | 5.239E-20 |
| DMKN     | cg10133777 | 93099     | 19 | TSS1500       | Open sea | -3.983E-01 | 6.493E-34 |
| DMRT1    | cg03168582 | 1761      | 9  | 1stExon       | Island   | 5.077E-01  | 4.111E-23 |
| DMRT2    | cg00250430 | 10655     | 9  | 5'UTR         | N-Shore  | 3.438E-01  | 5.203E-20 |
| DMRT3    | cg12420104 | 58524     | 9  | 1stExon       | Island   | 3.329E-01  | 2.457E-14 |
| DNM3     | cg23391785 | 26052     | 1  | Gene body     | Island   | 3.297E-01  | 1.366E-08 |
| DOK5     | cg11822659 | 55816     | 20 | Gene body     | Island   | 3.211E-01  | 2.766E-18 |
| DPP6     | cg26738880 | 1804      | 7  | Gene body     | Open sea | -3.283E-01 | 2.353E-23 |
| DPYS     | cg10303487 | 1807      | 8  | 1stExon       | Island   | 4.732E-01  | 3.086E-18 |
| DPYSL4   | cg12109455 | 10570     | 10 | Gene body     | Island   | 3.457E-01  | 1.101E-20 |
| DPYSL5   | cg26195812 | 56896     | 2  | 5'UTR         | Island   | 3.080E-01  | 1.639E-09 |
| DRD4     | cg06825142 | 1815      | 11 | TSS200        | Island   | 3.666E-01  | 1.561E-17 |

|         |            |        |    |                   |          |            |           |
|---------|------------|--------|----|-------------------|----------|------------|-----------|
| DSCR10  | cg17233935 | 259234 | 21 | TSS1500           | Open sea | -3.489E-01 | 3.870E-29 |
| DTX1    | cg11939071 | 1840   | 12 | TSS1500           | Island   | 3.163E-01  | 1.819E-12 |
| DUSP2   | cg01148741 | 1844   | 2  | TSS1500           | Island   | -3.590E-01 | 3.069E-22 |
| DYNLRB2 | cg00720137 | 83657  | 16 | Gene body         | Island   | 3.090E-01  | 1.532E-08 |
| ECEL1   | cg25431974 | 9427   | 2  | TSS1500           | Island   | 3.855E-01  | 2.063E-36 |
| ECM2    | cg24105685 | 1842   | 9  | TSS1500           | Open sea | -3.049E-01 | 6.748E-18 |
| EDIL3   | cg16773899 | 10085  | 5  | 5'UTR/1stExon     | Island   | 3.171E-01  | 3.719E-15 |
| EDNRB   | cg23316360 | 1910   | 13 | 5'UTR/1stExon     | Island   | 4.598E-01  | 1.364E-29 |
| EFCAB1  | cg22836229 | 79645  | 8  | 5'UTR             | Island   | 3.470E-01  | 3.265E-16 |
| EFHA2   | cg26831415 | 286097 | 8  | Gene body         | Island   | 3.118E-01  | 5.516E-16 |
| EIF4E1B | cg05028467 | 253314 | 5  | TSS1500           | Island   | 3.054E-01  | 1.541E-11 |
| EIF4E3  | cg13562542 | 317649 | 3  | 5'UTR/1stExon     | Island   | 3.902E-01  | 3.008E-13 |
| ELMO1   | cg08453021 | 9844   | 7  | TSS200            | Island   | 3.696E-01  | 2.451E-17 |
| ELMO1   | cg19118812 | 9844   | 7  | 5'UTR/1stExon     | Island   | 4.449E-01  | 4.898E-17 |
| ELOVL2  | cg13562911 | 54898  | 6  | Gene body         | Island   | 4.804E-01  | 6.854E-22 |
| ELOVL4  | cg13297865 | 6785   | 6  | TSS200            | Island   | 3.825E-01  | 9.919E-17 |
| EPB41L3 | cg00027083 | 23136  | 18 | 5'UTR             | Island   | 3.886E-01  | 1.071E-09 |
| EPDR1   | cg27641018 | 54749  | 7  | TSS1500           | N-Shore  | -3.436E-01 | 2.271E-20 |
| EPHA5   | cg18420965 | 2044   | 4  | Gene body         | N-Shore  | 3.262E-01  | 1.275E-15 |
| EPHA7   | cg08001895 | 2045   | 6  | TSS1500           | Island   | 3.058E-01  | 4.641E-13 |
| EPO     | cg08575537 | 2056   | 7  | Gene body         | Island   | 4.421E-01  | 2.146E-15 |
| ERBB4   | cg07015629 | 2066   | 2  | 1stExon           | Island   | 3.470E-01  | 1.388E-13 |
| ERBB4   | cg20637307 | 2066   | 2  | TSS1500           | S-Shore  | 3.858E-01  | 5.147E-12 |
| ERC2    | cg04759439 | 26059  | 3  | TSS1500           | Island   | 3.527E-01  | 1.363E-16 |
| ERP29   | cg26789453 | 10961  | 12 | Gene body/TSS1500 | S-Shore  | -3.956E-01 | 8.581E-17 |
| ESR1    | cg20253551 | 2099   | 6  | Gene body         | Island   | 3.150E-01  | 8.589E-13 |
| EYA4    | cg01805282 | 2070   | 6  | 5'UTR             | Island   | 3.629E-01  | 3.771E-23 |
| EYA4    | cg20286200 | 2070   | 6  | TSS1500           | Island   | 3.416E-01  | 7.775E-17 |
| EYA4    | cg20330472 | 2070   | 6  | TSS1500           | N-Shore  | 3.130E-01  | 1.233E-12 |
| EYA4    | cg24176563 | 2070   | 6  | 5'UTR/1stExon     | Island   | 3.499E-01  | 1.308E-20 |
| EYA4    | cg26656135 | 2070   | 6  | 5'UTR/1stExon     | Island   | 3.508E-01  | 9.282E-18 |
| FADS2   | cg07005513 | 9415   | 11 | 1stExon           | Island   | 3.407E-01  | 6.964E-18 |
| FAM123A | cg22029275 | 219287 | 13 | 1stExon           | Island   | 4.190E-01  | 4.190E-19 |
| FAM150A | cg17162024 | 389658 | 8  | TSS1500           | Island   | 4.114E-01  | 7.401E-19 |
| FAM19A4 | cg13921352 | 151647 | 3  | TSS200            | Island   | 3.597E-01  | 1.156E-15 |
| FAM20A  | cg01697732 | 54757  | 17 | TSS1500           | Island   | 3.932E-01  | 1.781E-11 |
| FAM20A  | cg13591701 | 54757  | 17 | 5'UTR/1stExon     | Island   | 3.608E-01  | 7.512E-15 |
| FBN1    | cg18671950 | 2200   | 15 | Gene body         | Island   | 3.620E-01  | 2.454E-19 |
| FBN2    | cg25084878 | 2201   | 5  | 1stExon/5'UTR     | Island   | 4.672E-01  | 1.512E-30 |
| FBXO39  | cg20723355 | 162517 | 17 | 5'UTR             | Island   | 3.705E-01  | 6.236E-15 |
| FCAR    | cg05252264 | 2204   | 19 | 1stExon           | Open sea | -3.214E-01 | 1.691E-20 |
| FCRL3   | cg08786003 | 115352 | 1  | TSS200            | Open sea | -3.642E-01 | 4.414E-22 |
| FCRL3   | cg25259754 | 115352 | 1  | Gene body         | Open sea | -3.471E-01 | 1.273E-20 |
| FERD3L  | cg25691167 | 222894 | 7  | 1stExon           | Island   | 3.394E-01  | 2.762E-12 |
| FGF2    | cg25583174 | 2247   | 4  | 1stExon           | Island   | 3.317E-01  | 1.026E-10 |
| FGF3    | cg15337897 | 2248   | 11 | TSS1500           | Island   | 3.451E-01  | 3.767E-14 |
| FLI1    | cg17872757 | 2313   | 11 | Gene body/5'UTR   | Island   | 4.055E-01  | 9.136E-14 |
| FLRT2   | cg17410236 | 23768  | 14 | 1stExon/5'UTR     | Island   | 4.145E-01  | 3.159E-25 |
| FLT3    | cg07017374 | 2322   | 13 | Gene body         | Island   | 4.789E-01  | 2.257E-18 |
| FLT4    | cg00489401 | 2324   | 5  | Gene body         | Island   | 3.789E-01  | 4.176E-14 |
| FOXD3   | cg22815110 | 27022  | 1  | 1stExon           | Island   | 3.571E-01  | 9.550E-18 |
| FOXE1   | cg15802898 | 2304   | 9  | TSS1500           | N-Shore  | 3.310E-01  | 3.114E-17 |
| FOXE1   | cg19292008 | 2304   | 9  | 5'UTR/1stExon     | Island   | 3.324E-01  | 8.556E-17 |
| FOXG1   | cg10300684 | 2290   | 14 | 1stExon/5'UTR     | N-Shore  | 3.086E-01  | 7.185E-13 |
| FOXI2   | cg13929328 | 399823 | 10 | 1stExon           | Island   | 3.157E-01  | 2.089E-16 |
| FOXI2   | cg19884262 | 399823 | 10 | 1stExon           | Island   | 3.558E-01  | 6.971E-23 |
| FZD10   | cg23054883 | 11211  | 12 | 1stExon           | Island   | 3.526E-01  | 6.477E-20 |
| FZD2    | cg25228126 | 2535   | 17 | 1stExon           | Island   | 3.324E-01  | 1.539E-25 |
| GABBR2  | cg02058918 | 9568   | 9  | 1stExon           | Island   | 3.467E-01  | 5.616E-13 |
| GAL3ST3 | cg21238818 | 89792  | 11 | 5'UTR/1stExon     | Island   | 3.682E-01  | 4.229E-28 |
| GALR1   | cg00662556 | 2587   | 18 | Gene body         | Island   | 3.008E-01  | 4.871E-18 |
| GALR1   | cg04534765 | 2587   | 18 | 1stExon/5'UTR     | Island   | 4.432E-01  | 7.060E-11 |
| GALR1   | cg10486998 | 2587   | 18 | TSS1500           | Island   | 3.493E-01  | 2.909E-19 |

|                  |            |        |    |                 |          |            |           |
|------------------|------------|--------|----|-----------------|----------|------------|-----------|
| <i>GALR1</i>     | cg15343119 | 2587   | 18 | TSS1500         | Island   | 3.062E-01  | 8.094E-14 |
| <i>GALR1</i>     | cg26721264 | 2587   | 18 | TSS1500         | Island   | 4.458E-01  | 1.467E-23 |
| <i>GBGT1</i>     | cg01169778 | 26301  | 9  | 5'UTR           | Island   | 4.023E-01  | 3.466E-37 |
| <i>GBX2</i>      | cg06954481 | 2637   | 2  | 1stExon         | Island   | 3.161E-01  | 4.334E-09 |
| <i>GCM2</i>      | cg02844545 | 9247   | 6  | 1stExon/5'UTR   | Island   | 3.313E-01  | 4.658E-21 |
| <i>GDNF</i>      | cg07442479 | 2668   | 5  | 1stExon/5'UTR   | Island   | 3.854E-01  | 3.565E-21 |
| <i>GDPD3</i>     | cg13543096 | 79153  | 16 | TSS1500         | Open sea | 3.326E-01  | 6.833E-18 |
| <i>GFPT2</i>     | cg21937886 | 9945   | 5  | Gene body       | Island   | 3.664E-01  | 1.214E-12 |
| <i>GFRA1</i>     | cg23898073 | 2674   | 10 | 1stExon/5'UTR   | Island   | 3.138E-01  | 3.259E-12 |
| <i>GK2</i>       | cg17738194 | 2712   | 4  | TSS200          | Open sea | -3.460E-01 | 1.444E-27 |
| <i>GLB1L3</i>    | cg19674669 | 112937 | 11 | Gene body       | Island   | 3.150E-01  | 1.908E-16 |
| <i>GLRB</i>      | cg09688546 | 2743   | 4  | 1stExon/TSS200  | Island   | 3.159E-01  | 1.261E-13 |
| <i>GNA15</i>     | cg26482939 | 2769   | 19 | Gene body       | Open sea | -3.666E-01 | 5.441E-24 |
| <i>GNG4</i>      | cg09649610 | 2786   | 1  | TSS1500/1stExon | Island   | 3.289E-01  | 1.228E-17 |
| <i>GPATCH2</i>   | cg01727899 | 55105  | 1  | TSS1500         | S-Shore  | -3.703E-01 | 1.106E-31 |
| <i>GPR25</i>     | cg21870884 | 2848   | 1  | 1stExon         | Island   | 3.054E-01  | 1.730E-16 |
| <i>GPR26</i>     | cg02757432 | 2849   | 10 | 1stExon         | Island   | 3.545E-01  | 2.200E-22 |
| <i>GPR27</i>     | cg13562542 | 2850   | 3  | 1stExon         | Island   | 3.902E-01  | 3.008E-13 |
| <i>GPR55</i>     | cg20287234 | 9290   | 2  | 5'UTR           | Open sea | -3.205E-01 | 5.660E-20 |
| <i>GPR75</i>     | cg14832904 | 10936  | 2  | 5'UTR           | Island   | 3.586E-01  | 1.505E-17 |
| <i>GPR75</i>     | cg19664945 | 10936  | 2  | TSS1500         | S-Shore  | 3.617E-01  | 2.447E-11 |
| <i>GPX7</i>      | cg16557944 | 2882   | 1  | 1stExon         | Island   | 3.670E-01  | 4.594E-12 |
| <i>GRAP2</i>     | cg03840259 | 9402   | 22 | TSS200          | Open sea | -3.040E-01 | 1.398E-12 |
| <i>GRASP</i>     | cg04034767 | 160622 | 12 | 1stExon         | Island   | 4.238E-01  | 9.232E-15 |
| <i>GREB1</i>     | cg10612997 | 9687   | 2  | TSS1500         | Open sea | -3.172E-01 | 1.402E-24 |
| <i>GREB1</i>     | cg10849854 | 9687   | 2  | 5'UTR           | Open sea | -3.338E-01 | 2.983E-20 |
| <i>GRIA2</i>     | cg25148589 | 2891   | 4  | 1stExon/5'UTR   | N-Shore  | 3.143E-01  | 3.639E-21 |
| <i>GRIA4</i>     | cg09980522 | 2893   | 11 | Gene body       | S-Shore  | 3.913E-01  | 2.108E-31 |
| <i>GRIK2</i>     | cg26316946 | 2898   | 6  | 1stExon         | Island   | 3.342E-01  | 4.622E-22 |
| <i>GRIK3</i>     | cg06722633 | 2899   | 1  | Gene body       | Island   | 3.688E-01  | 1.675E-21 |
| <i>GRIN3A</i>    | cg18794577 | 116443 | 9  | TSS200          | Island   | 3.533E-01  | 1.903E-13 |
| <i>GRM6</i>      | cg14859460 | 2916   | 5  | TSS200          | Island   | 3.357E-01  | 1.209E-14 |
| <i>GRM8</i>      | cg09868882 | 2918   | 7  | TSS200/5'UTR    | Open sea | -3.256E-01 | 6.951E-23 |
| <i>GSC2</i>      | cg26599006 | 2928   | 22 | Gene body       | Island   | 3.254E-01  | 1.739E-12 |
| <i>GSX1</i>      | cg26609631 | 219409 | 13 | 5'UTR/1stExon   | Island   | 3.392E-01  | 7.539E-07 |
| <i>GUCY1A2</i>   | cg23984434 | 2977   | 11 | 1stExon         | Island   | 3.825E-01  | 6.741E-15 |
| <i>GUCY2C</i>    | cg18754342 | 2984   | 12 | 1stExon         | Open sea | -3.785E-01 | 1.078E-23 |
| <i>GZMH</i>      | cg02150910 | 2999   | 14 | TSS1500         | Open sea | -3.314E-01 | 1.528E-25 |
| <i>HAND2</i>     | cg01580681 | 9464   | 4  | 1stExon         | N-Shore  | 3.238E-01  | 4.880E-19 |
| <i>HAVCR2</i>    | cg17484237 | 84868  | 5  | 5'UTR/1stExon   | Open sea | -3.505E-01 | 1.612E-22 |
| <i>HBB</i>       | cg14544583 | 3043   | 11 | TSS1500         | Open sea | -3.561E-01 | 6.196E-30 |
| <i>HBE1</i>      | cg08970694 | 3046   | 11 | Gene body       | Open sea | -3.523E-01 | 1.051E-30 |
| <i>HBQ1</i>      | cg07703401 | 3049   | 16 | 1stExon/5'UTR   | Island   | 3.344E-01  | 2.356E-13 |
| <i>HHIP</i>      | cg13749822 | 64399  | 4  | TSS1500         | Island   | 3.004E-01  | 1.980E-16 |
| <i>HHIP</i>      | cg14580567 | 64399  | 4  | 1stExon/5'UTR   | Island   | 3.415E-01  | 1.564E-15 |
| <i>HHIPL1</i>    | cg06834875 | 84439  | 14 | TSS1500         | Island   | -3.093E-01 | 5.994E-17 |
| <i>HIF3A</i>     | cg07022477 | 64344  | 19 | TSS1500         | N-Shore  | -3.692E-01 | 2.582E-27 |
| <i>HIST1H2BO</i> | cg12629515 | 8348   | 6  | TSS1500         | N-Shore  | -3.940E-01 | 4.708E-26 |
| <i>HIST1H3J</i>  | cg12629515 | 8356   | 6  | TSS1500         | N-Shore  | -3.940E-01 | 4.708E-26 |
| <i>HKR1</i>      | cg12024906 | 284459 | 19 | 1stExon/5'UTR   | Island   | 3.479E-01  | 5.020E-14 |
| <i>HOXA9</i>     | cg01381846 | 3205   | 7  | 1stExon         | Island   | 3.498E-01  | 3.584E-13 |
| <i>HOXA9</i>     | cg26521404 | 3205   | 7  | 1stExon         | Island   | 4.587E-01  | 1.365E-12 |
| <i>HOXA9</i>     | cg27009703 | 3205   | 7  | 1stExon         | Island   | 3.025E-01  | 3.480E-10 |
| <i>HOXB4</i>     | cg08089301 | 3214   | 17 | 1stExon         | Island   | 4.095E-01  | 1.322E-14 |
| <i>HOXB4</i>     | cg14458834 | 3214   | 17 | 1stExon         | Island   | 3.724E-01  | 1.237E-11 |
| <i>HOXB4</i>     | cg21546671 | 3214   | 17 | 1stExon         | Island   | 3.641E-01  | 8.620E-13 |
| <i>HOXD1</i>     | cg19001226 | 3231   | 2  | 1stExon/5'UTR   | Island   | 3.575E-01  | 6.231E-13 |
| <i>HOXD10</i>    | cg21591742 | 3236   | 2  | TSS1500         | Island   | 3.052E-01  | 4.101E-14 |
| <i>HOXD12</i>    | cg23130254 | 3238   | 2  | 1stExon         | Island   | 3.245E-01  | 1.023E-18 |
| <i>HOXD8</i>     | cg15520279 | 3234   | 2  | 5'UTR/1stExon   | Island   | 3.703E-01  | 1.334E-16 |
| <i>HOXD9</i>     | cg14991487 | 3235   | 2  | TSS200          | Island   | 4.253E-01  | 9.238E-22 |
| <i>HS3ST2</i>    | cg19064258 | 9956   | 16 | 1stExon         | Island   | 3.367E-01  | 8.948E-19 |
| <i>HS3ST3A1</i>  | cg07480567 | 9955   | 17 | 1stExon/5'UTR   | Island   | 3.519E-01  | 7.527E-17 |

|                     |            |        |    |               |          |            |           |
|---------------------|------------|--------|----|---------------|----------|------------|-----------|
| <i>HSPA2</i>        | cg27120999 | 3306   | 14 | 1stExon       | Island   | 3.428E-01  | 2.905E-30 |
| <i>IAPP</i>         | cg15583072 | 3375   | 12 | TSS200        | Open sea | -3.043E-01 | 1.835E-23 |
| <i>IDO2</i>         | cg16957569 | 169355 | 8  | TSS1500       | Open sea | -3.026E-01 | 8.310E-30 |
| <i>IGF2</i>         | cg13791131 | 3481   | 11 | Gene body     | Island   | 4.016E-01  | 4.236E-20 |
| <i>IGF2</i>         | cg25163476 | 3481   | 11 | 5'UTR         | Island   | 3.132E-01  | 5.186E-18 |
| <i>IGF2</i>         | cg25574024 | 3481   | 11 | Gene body     | Island   | 4.374E-01  | 5.525E-21 |
| <i>IGF2AS</i>       | cg13791131 | 51214  | 11 | Gene body     | Island   | 4.016E-01  | 4.236E-20 |
| <i>IGF2AS</i>       | cg25163476 | 51214  | 11 | Gene body     | Island   | 3.132E-01  | 5.186E-18 |
| <i>IGF2AS</i>       | cg25574024 | 51214  | 11 | Gene body     | Island   | 4.374E-01  | 5.525E-21 |
| <i>IGFBP3</i>       | cg15898840 | 3486   | 7  | 1stExon/5'UTR | Island   | 3.026E-01  | 3.225E-07 |
| <i>IGSF21</i>       | cg23349790 | 84966  | 1  | 5'UTR/1stExon | Island   | 5.041E-01  | 1.132E-12 |
| <i>IL1B</i>         | cg07935264 | 3553   | 2  | TSS200        | Open sea | -4.207E-01 | 3.490E-19 |
| <i>IL25</i>         | cg14366598 | 64806  | 14 | TSS1500       | Open sea | -3.321E-01 | 2.027E-19 |
| <i>IL2RA</i>        | cg26105232 | 3559   | 10 | TSS1500       | Open sea | -3.221E-01 | 5.977E-27 |
| <i>INS-IGF2</i>     | cg13791131 | 723961 | 11 | Gene body     | Island   | 4.016E-01  | 4.236E-20 |
| <i>INS-IGF2</i>     | cg25163476 | 723961 | 11 | Gene body     | Island   | 3.132E-01  | 5.186E-18 |
| <i>INS-IGF2</i>     | cg25574024 | 723961 | 11 | Gene body     | Island   | 4.374E-01  | 5.525E-21 |
| <i>IPO5</i>         | cg01679262 | 3843   | 13 | 5'UTR         | Open sea | -3.904E-01 | 5.217E-29 |
| <i>IRX4</i>         | cg00243313 | 50805  | 5  | TSS1500       | Island   | 3.249E-01  | 2.458E-16 |
| <i>IRX4</i>         | cg03963198 | 50805  | 5  | 5'UTR/1stExon | Island   | 4.360E-01  | 4.134E-20 |
| <i>ITGA4</i>        | cg20415809 | 3676   | 2  | 5'UTR/1stExon | Island   | 3.420E-01  | 9.650E-15 |
| <i>ITGA8</i>        | cg16902509 | 8516   | 10 | Gene body     | N-Shore  | 3.079E-01  | 1.362E-21 |
| <i>ITGA9</i>        | cg25870420 | 3680   | 3  | 1stExon       | Island   | 3.463E-01  | 4.440E-15 |
| <i>IVL</i>          | cg25082710 | 3713   | 1  | TSS1500       | Open sea | -3.806E-01 | 5.243E-21 |
| <i>KARS</i>         | cg08585897 | 3735   | 16 | 5'UTR         | N-Shore  | -3.179E-01 | 8.545E-29 |
| <i>KCNA6</i>        | cg26162582 | 3742   | 12 | 5'UTR/1stExon | Island   | 3.742E-01  | 1.636E-18 |
| <i>KCNB1</i>        | cg24507762 | 3745   | 20 | TSS1500       | N-Shore  | 3.124E-01  | 4.403E-18 |
| <i>KCNG1</i>        | cg24924779 | 3755   | 20 | TSS1500       | Island   | 3.490E-01  | 3.499E-12 |
| <i>KCNK9</i>        | cg17834752 | 51305  | 8  | 5'UTR/1stExon | Island   | 3.106E-01  | 1.289E-16 |
| <i>KCNQ1DN</i>      | cg01530101 | 55539  | 11 | TSS200        | Island   | 3.172E-01  | 1.798E-09 |
| <i>KCNQ3</i>        | cg27016990 | 3786   | 8  | 1stExon       | Island   | 4.374E-01  | 2.039E-16 |
| <i>KCNQ5</i>        | cg24687051 | 56479  | 6  | 1stExon       | Island   | 4.584E-01  | 5.513E-17 |
| <i>KCNV1</i>        | cg04237663 | 27012  | 8  | TSS200        | N-Shore  | 3.128E-01  | 4.826E-17 |
| <i>KCNV1</i>        | cg05860890 | 27012  | 8  | 5'UTR/1stExon | Island   | 3.088E-01  | 6.557E-20 |
| <i>KCTD1</i>        | cg26755793 | 284252 | 18 | TSS1500       | Open sea | -3.001E-01 | 1.473E-27 |
| <i>KCTD8</i>        | cg12300353 | 386617 | 4  | 1stExon       | Island   | 3.545E-01  | 8.412E-17 |
| <i>KHDRBS2</i>      | cg18239753 | 202559 | 6  | 1stExon/5'UTR | Island   | 3.355E-01  | 3.193E-20 |
| <i>KRT1</i>         | cg17405586 | 3848   | 12 | TSS200        | Open sea | -3.802E-01 | 1.335E-27 |
| <i>KRT85</i>        | cg21518208 | 3891   | 12 | TSS200        | S-Shore  | -3.308E-01 | 8.270E-28 |
| <i>KRTAP11-1</i>    | cg22643217 | 337880 | 21 | TSS200        | Open sea | -3.406E-01 | 3.265E-20 |
| <i>KRTAP26-1</i>    | cg18822544 | 388818 | 21 | 5'UTR/1stExon | Open sea | -3.160E-01 | 9.181E-23 |
| <i>KRTAP4-4</i>     | cg15312323 | 84616  | 17 | TSS1500       | Open sea | -3.025E-01 | 2.291E-40 |
| <i>KRTDAP</i>       | cg10305797 | 388533 | 19 | TSS1500       | Open sea | -3.464E-01 | 9.987E-22 |
| <i>LACRT</i>        | cg07643942 | 90070  | 12 | TSS1500       | Open sea | -4.286E-01 | 7.239E-31 |
| <i>LAMA1</i>        | cg07846220 | 284217 | 18 | 1stExon       | Island   | 4.733E-01  | 7.475E-15 |
| <i>LAT2</i>         | cg03375002 | 7462   | 7  | TSS1500       | Open sea | -3.625E-01 | 2.831E-24 |
| <i>LEP</i>          | cg19594666 | 3952   | 7  | TSS200        | Island   | 3.277E-01  | 1.166E-12 |
| <i>LHX1</i>         | cg22660578 | 3975   | 17 | TSS1500       | Island   | 3.510E-01  | 6.949E-14 |
| <i>LIN7A</i>        | cg05647859 | 8825   | 12 | TSS200        | S-Shore  | 3.301E-01  | 2.885E-11 |
| <i>LMX1B</i>        | cg18453621 | 4010   | 9  | Gene body     | Island   | 3.045E-01  | 3.055E-11 |
| <i>LOC100271831</i> | cg13543096 | NA     | 16 | TSS200        | Open sea | 3.326E-01  | 6.833E-18 |
| <i>LOC100302652</i> | cg14832904 | NA     | 2  | 1stExon       | Island   | 3.586E-01  | 1.505E-17 |
| <i>LOC100302652</i> | cg19664945 | NA     | 2  | TSS200        | S-Shore  | 3.617E-01  | 2.447E-11 |
| <i>LOC284805</i>    | cg26331247 | NA     | 20 | Gene body     | Open sea | -3.353E-01 | 1.237E-24 |
| <i>LOC285780</i>    | cg17774418 | NA     | 6  | Gene body     | Open sea | -3.205E-01 | 4.631E-20 |
| <i>LOC286002</i>    | cg14646244 | NA     | 7  | Gene body     | N-Shore  | -3.649E-01 | 4.293E-18 |
| <i>LPAR3</i>        | cg06501070 | 23566  | 1  | 5'UTR         | Open sea | -3.175E-01 | 5.203E-22 |
| <i>LRRC4</i>        | cg15087147 | 64101  | 7  | TSS1500       | Island   | 3.029E-01  | 1.642E-12 |
| <i>LRTOMT</i>       | cg23256971 | 220074 | 11 | 5'UTR         | S-Shore  | 3.525E-01  | 4.653E-46 |
| <i>LVRN</i>         | cg25044651 | 206338 | 5  | 1stExon       | Island   | 3.399E-01  | 8.823E-20 |
| <i>LY86</i>         | cg17774418 | 9450   | 6  | Gene body     | Open sea | -3.205E-01 | 4.631E-20 |
| <i>MAFB</i>         | cg02497758 | 9935   | 20 | 1stExon       | Island   | 3.776E-01  | 1.057E-18 |
| <i>MCHR2</i>        | cg20134215 | 84539  | 6  | 5'UTR         | Island   | 3.028E-01  | 5.854E-17 |

|                 |            |        |    |                   |          |            |           |
|-----------------|------------|--------|----|-------------------|----------|------------|-----------|
| <i>MGAT5B</i>   | cg00654814 | 146664 | 17 | 1stExon/5'UTR     | Island   | 3.384E-01  | 1.508E-16 |
| <i>MGMT</i>     | cg07638938 | 4255   | 10 | Gene body         | Open sea | 3.902E-01  | 5.714E-40 |
| <i>MIR34B</i>   | cg22879515 | 407041 | 11 | TSS200            | Island   | 3.670E-01  | 7.990E-13 |
| <i>MIR34B</i>   | cg23211240 | 407041 | 11 | TSS200            | Island   | 3.101E-01  | 1.603E-14 |
| <i>MIR34C</i>   | cg22879515 | 407042 | 11 | TSS200            | Island   | 3.670E-01  | 7.990E-13 |
| <i>MIR34C</i>   | cg23211240 | 407042 | 11 | TSS200            | Island   | 3.101E-01  | 1.603E-14 |
| <i>MLNR</i>     | cg02620013 | 2862   | 13 | 1stExon           | Island   | 3.054E-01  | 9.353E-16 |
| <i>MMP26</i>    | cg12493906 | 56547  | 11 | TSS200            | Open sea | -3.010E-01 | 1.620E-17 |
| <i>MMRN1</i>    | cg21092324 | 22915  | 4  | 1stExon           | Open sea | -3.663E-01 | 2.234E-18 |
| <i>MN1</i>      | cg27269921 | 4330   | 22 | 5'UTR/1stExon     | Island   | 3.700E-01  | 6.783E-15 |
| <i>MRGPRX1</i>  | cg23001457 | 259249 | 11 | 1stExon           | Open sea | -3.476E-01 | 5.616E-28 |
| <i>MSC</i>      | cg23710218 | 9242   | 8  | 1stExon/5'UTR     | Island   | 3.611E-01  | 8.265E-26 |
| <i>MSX1</i>     | cg09748975 | 4487   | 4  | Gene body         | Island   | 3.617E-01  | 3.126E-09 |
| <i>MTNR1B</i>   | cg15842276 | 4544   | 11 | TSS200            | N-Shore  | 3.009E-01  | 3.843E-19 |
| <i>MYBPH</i>    | cg18959422 | 4608   | 1  | TSS1500           | Open sea | -3.218E-01 | 6.663E-22 |
| <i>MYCBP</i>    | cg12792157 | 26292  | 1  | 5'UTR/1stExon     | Island   | -4.232E-01 | 1.286E-22 |
| <i>MYCT1</i>    | cg02830467 | 80177  | 6  | TSS1500           | Open sea | -3.348E-01 | 8.921E-26 |
| <i>MYEOV</i>    | cg24776407 | 26579  | 11 | 5'UTR/1stExon     | Open sea | -3.460E-01 | 8.179E-20 |
| <i>MYO3A</i>    | cg08441170 | 53904  | 10 | 1stExon/5'UTR     | Island   | 4.102E-01  | 3.258E-13 |
| <i>MYO3A</i>    | cg23771603 | 53904  | 10 | 5'UTR             | Island   | 4.503E-01  | 1.318E-17 |
| <i>NALCN</i>    | cg15202954 | 259232 | 13 | TSS200            | Island   | 3.946E-01  | 2.547E-19 |
| <i>NAT8L</i>    | cg21269934 | 339983 | 4  | TSS1500           | Island   | 3.209E-01  | 4.199E-18 |
| <i>NAV1</i>     | cg25167447 | 89796  | 1  | TSS1500           | Island   | 3.105E-01  | 7.652E-14 |
| <i>NCAN</i>     | cg06952310 | 1463   | 19 | Gene body         | Open sea | -3.086E-01 | 3.065E-22 |
| <i>NCAPH</i>    | cg01906055 | 23397  | 2  | TSS1500           | N-Shore  | -3.628E-01 | 1.739E-31 |
| <i>NEFM</i>     | cg23290344 | 4741   | 8  | TSS1500/1stExon   | Island   | 3.864E-01  | 1.474E-10 |
| <i>NETO1</i>    | cg26186727 | 81832  | 18 | 1stExon/5'UTR     | Island   | 3.067E-01  | 8.057E-13 |
| <i>NEUROG1</i>  | cg04330449 | 4762   | 5  | 1stExon           | Island   | 3.983E-01  | 1.680E-13 |
| <i>NEUROG1</i>  | cg04897683 | 4762   | 5  | 5'UTR/1stExon     | Island   | 3.326E-01  | 1.797E-16 |
| <i>NEUROG1</i>  | cg11248413 | 4762   | 5  | TSS200            | Island   | 3.022E-01  | 1.593E-11 |
| <i>NHLH2</i>    | cg22422729 | 4808   | 1  | TSS1500           | S-Shelf  | -3.444E-01 | 1.933E-16 |
| <i>NID2</i>     | cg01231779 | 22795  | 14 | 5'UTR/1stExon     | Island   | 3.566E-01  | 4.071E-14 |
| <i>NID2</i>     | cg22881914 | 22795  | 14 | TSS1500           | Island   | 4.200E-01  | 7.205E-19 |
| <i>NIPSNAP1</i> | cg13797031 | 8508   | 22 | TSS1500           | S-Shore  | -3.567E-01 | 1.259E-20 |
| <i>NKAIN2</i>   | cg21787291 | 154215 | 6  | 5'UTR/1stExon     | Island   | 3.609E-01  | 3.074E-13 |
| <i>NKX6-2</i>   | cg08441806 | 84504  | 10 | 1stExon           | Island   | 3.350E-01  | 1.972E-11 |
| <i>NLGN2</i>    | cg15660077 | 57555  | 17 | 1stExon           | N-Shore  | 3.788E-01  | 1.805E-37 |
| <i>NOS1</i>     | cg03538436 | 4842   | 12 | 5'UTR/1stExon     | Island   | 3.399E-01  | 2.126E-15 |
| <i>NPR2</i>     | cg12876594 | 4882   | 9  | TSS1500           | Island   | 3.898E-01  | 1.493E-15 |
| <i>NPR2</i>     | cg24194775 | 4882   | 9  | TSS1500           | N-Shore  | 4.529E-01  | 1.809E-13 |
| <i>NPTX2</i>    | cg00548268 | 4885   | 7  | TSS1500           | Island   | 3.363E-01  | 1.877E-23 |
| <i>NPY5R</i>    | cg18438777 | 4889   | 4  | 5'UTR             | Island   | 3.759E-01  | 1.363E-17 |
| <i>NRG1</i>     | cg17457560 | 3084   | 8  | 1stExon/5'UTR     | Island   | 4.051E-01  | 6.334E-19 |
| <i>NTM</i>      | cg20881910 | 50863  | 11 | TSS1500           | Island   | 3.818E-01  | 1.548E-21 |
| <i>NTRK3</i>    | cg14384532 | 4916   | 15 | TSS1500           | Island   | 3.155E-01  | 1.647E-18 |
| <i>NUDT15</i>   | cg11473104 | 55270  | 13 | TSS200            | N-Shore  | 3.415E-01  | 2.012E-46 |
| <i>OPRK1</i>    | cg25990647 | 4986   | 8  | 5'UTR/1stExon     | Island   | 3.735E-01  | 7.439E-17 |
| <i>OR10J1</i>   | cg15700197 | 26476  | 1  | TSS1500           | Open sea | -3.518E-01 | 1.741E-15 |
| <i>OR12D3</i>   | cg20856834 | 81797  | 6  | 1stExon           | Open sea | -3.108E-01 | 1.161E-18 |
| <i>OR51B4</i>   | cg06353345 | 79339  | 11 | 1stExon           | Open sea | -3.896E-01 | 3.854E-33 |
| <i>OSTN</i>     | cg03192737 | 344901 | 3  | Gene body         | Open sea | -3.351E-01 | 6.768E-29 |
| <i>PAX3</i>     | cg25596297 | 5077   | 2  | Gene body         | N-Shore  | 3.082E-01  | 3.662E-14 |
| <i>PAX7</i>     | cg07536847 | 5081   | 1  | TSS1500           | Island   | 3.379E-01  | 8.412E-15 |
| <i>PAX7</i>     | cg11428724 | 5081   | 1  | 5'UTR/1stExon     | Island   | 4.166E-01  | 7.079E-18 |
| <i>PCDHA7</i>   | cg12629325 | 56141  | 5  | Gene body         | Island   | 4.304E-01  | 1.459E-16 |
| <i>PCDHAC1</i>  | cg12629325 | 56135  | 5  | 1stExon           | Island   | 4.304E-01  | 1.459E-16 |
| <i>PCSK6</i>    | cg20249919 | 5046   | 15 | 1stExon           | Island   | 3.390E-01  | 5.442E-09 |
| <i>PDE10A</i>   | cg24133115 | 10846  | 6  | 5'UTR/1stExon     | Island   | 3.416E-01  | 3.247E-13 |
| <i>PDE4B</i>    | cg26963271 | 5142   | 1  | 5'UTR             | S-Shore  | 3.291E-01  | 2.166E-16 |
| <i>PHACTR3</i>  | cg20357628 | 116154 | 20 | 5'UTR/1stExon     | Island   | 3.861E-01  | 4.794E-15 |
| <i>PHF21B</i>   | cg01775414 | 112885 | 22 | 1stExon/Gene body | Island   | 3.363E-01  | 2.100E-13 |
| <i>PIPOX</i>    | cg06144905 | 51268  | 17 | TSS200            | Open sea | -3.313E-01 | 1.246E-16 |
| <i>PKDREJ</i>   | cg11377136 | 10343  | 22 | 1stExon           | Island   | 4.882E-01  | 7.168E-16 |

|                  |            |        |    |                   |          |            |           |
|------------------|------------|--------|----|-------------------|----------|------------|-----------|
| <i>PKP2</i>      | cg03302287 | 5318   | 12 | 1stExon           | Island   | -3.218E-01 | 3.249E-43 |
| <i>PLA2G7</i>    | cg18630040 | 7941   | 6  | 1stExon/5'UTR     | Island   | 3.865E-01  | 8.349E-14 |
| <i>PLCL1</i>     | cg02833180 | 5334   | 2  | Gene body         | Open sea | -3.053E-01 | 4.873E-19 |
| <i>PLD5</i>      | cg01664666 | 200150 | 1  | 5'UTR             | Island   | 3.268E-01  | 6.318E-16 |
| <i>PLEKHF1</i>   | cg05512099 | 79156  | 19 | TSS1500           | N-Shore  | -4.156E-01 | 4.261E-31 |
| <i>PNMAL1</i>    | cg17296166 | 55228  | 19 | 5'UTR             | Island   | 3.558E-01  | 4.050E-14 |
| <i>POU3F3</i>    | cg20291049 | 5455   | 2  | 1stExon           | Island   | 3.527E-01  | 9.375E-17 |
| <i>POU4F1</i>    | cg08097882 | 5457   | 13 | 5'UTR/1stExon     | Island   | 3.287E-01  | 7.788E-13 |
| <i>POU4F2</i>    | cg24199834 | 5458   | 4  | 1stExon/5'UTR     | Island   | 3.498E-01  | 3.075E-18 |
| <i>PRAC</i>      | cg12374721 | 84366  | 17 | Gene body         | N-Shore  | 4.322E-01  | 5.743E-20 |
| <i>PRB1</i>      | cg27345534 | 5542   | 12 | TSS1500           | Open sea | -3.158E-01 | 1.433E-29 |
| <i>PRDM14</i>    | cg01295203 | 63978  | 8  | TSS1500           | Island   | 3.360E-01  | 2.766E-15 |
| <i>PRG2</i>      | cg15357945 | 5553   | 11 | TSS1500           | Open sea | -3.127E-01 | 1.787E-26 |
| <i>PRICKLE1</i>  | cg16041660 | 144165 | 12 | 5'UTR/1stExon     | Island   | 3.068E-01  | 2.606E-10 |
| <i>PRKAR1B</i>   | cg13577076 | 5575   | 7  | 5'UTR             | S-Shore  | 4.021E-01  | 3.470E-20 |
| <i>PRKCB</i>     | cg05436658 | 5579   | 16 | 1stExon           | Island   | 3.015E-01  | 1.681E-12 |
| <i>PSMB9</i>     | cg03465320 | 5698   | 6  | Gene body         | S-Shore  | -3.089E-01 | 1.695E-12 |
| <i>PSME2</i>     | cg05874478 | 5721   | 14 | 1stExon           | N-Shore  | -3.348E-01 | 2.611E-31 |
| <i>PTF1A</i>     | cg11438428 | 256297 | 10 | 1stExon           | Island   | 3.568E-01  | 3.440E-18 |
| <i>PTGDR</i>     | cg09516965 | 5729   | 14 | 1stExon/5'UTR     | Island   | 4.339E-01  | 1.207E-15 |
| <i>PTH2R</i>     | cg25057743 | 5746   | 2  | TSS200            | Island   | 3.611E-01  | 5.470E-26 |
| <i>PTP4A3</i>    | cg18675600 | 11156  | 8  | 5'UTR/1stExon     | S-Shelf  | -3.286E-01 | 1.651E-18 |
| <i>PTPRM</i>     | cg01946574 | 5797   | 18 | Gene body         | Island   | 3.523E-01  | 1.263E-18 |
| <i>PTPRO</i>     | cg09126273 | 5800   | 12 | Gene body         | Island   | 3.037E-01  | 1.717E-11 |
| <i>PTPRO</i>     | cg10646402 | 5800   | 12 | 1stExon/5'UTR     | Island   | 3.149E-01  | 2.574E-12 |
| <i>PTPRO</i>     | cg11843304 | 5800   | 12 | Gene body         | Open sea | -3.169E-01 | 1.460E-20 |
| <i>PTPRR</i>     | cg23694248 | 5801   | 12 | 1stExon/5'UTR     | Open sea | 3.115E-01  | 5.532E-14 |
| <i>PTPRT</i>     | cg13168820 | 11122  | 20 | 1stExon           | Island   | 3.747E-01  | 2.247E-17 |
| <i>PXDN</i>      | cg12164282 | 7837   | 2  | 1stExon           | Island   | 4.689E-01  | 6.510E-17 |
| <i>PXDN</i>      | cg14037665 | 7837   | 2  | TSS1500           | Island   | 3.637E-01  | 3.699E-21 |
| <i>PYCARD</i>    | cg12100791 | 29108  | 16 | TSS200            | S-Shore  | -3.116E-01 | 1.236E-11 |
| <i>QRFPR</i>     | cg00015770 | 84109  | 4  | 1stExon/5'UTR     | Island   | 3.304E-01  | 1.493E-21 |
| <i>RASGRF2</i>   | cg09952204 | 5924   | 5  | 1stExon           | Island   | 3.433E-01  | 7.705E-18 |
| <i>RELN</i>      | cg17923358 | 5649   | 7  | 1stExon           | Island   | 3.479E-01  | 1.330E-20 |
| <i>RGS6</i>      | cg03188118 | 9628   | 14 | 5'UTR/1stExon     | S-Shore  | 3.589E-01  | 6.930E-25 |
| <i>RIC3</i>      | cg08383315 | 79608  | 11 | 1stExon/5'UTR     | Island   | 3.214E-01  | 1.971E-18 |
| <i>RIMBP2</i>    | cg24272907 | 23504  | 12 | TSS1500           | Open sea | -3.616E-01 | 2.896E-31 |
| <i>RNF207</i>    | cg00030047 | 388591 | 1  | Gene body         | N-Shore  | 3.741E-01  | 6.582E-24 |
| <i>RNF217</i>    | cg24298280 | 154214 | 6  | 5'UTR             | Open sea | -3.460E-01 | 1.121E-19 |
| <i>RNF31</i>     | cg05874478 | 55072  | 14 | TSS1500           | N-Shore  | -3.348E-01 | 2.611E-31 |
| <i>RPL36</i>     | cg25136310 | 25873  | 19 | 1stExon/Gene body | Island   | -3.224E-01 | 1.846E-28 |
| <i>RSPO2</i>     | cg14070647 | 340419 | 8  | 5'UTR             | Island   | 3.082E-01  | 9.292E-17 |
| <i>RUNDC3B</i>   | cg15414833 | 154661 | 7  | 1stExon/5'UTR     | Island   | 3.053E-01  | 1.830E-07 |
| <i>RUNX1</i>     | cg04915566 | 861    | 21 | 5'UTR/1stExon     | Open sea | -3.074E-01 | 1.429E-12 |
| <i>RUNX3</i>     | cg03171924 | 864    | 1  | Gene body         | Island   | 3.632E-01  | 3.721E-21 |
| <i>RYR2</i>      | cg11657808 | 6262   | 1  | Gene body         | Island   | 5.027E-01  | 4.003E-29 |
| <i>S100A8</i>    | cg20070090 | 6279   | 1  | 5'UTR             | Open sea | -3.345E-01 | 5.935E-24 |
| <i>SALL1</i>     | cg22674717 | 6299   | 16 | TSS1500           | Island   | 3.482E-01  | 2.257E-23 |
| <i>SALL3</i>     | cg15191648 | 27164  | 18 | TSS200            | Island   | 3.612E-01  | 4.041E-14 |
| <i>SCARF2</i>    | cg14785479 | 91179  | 22 | TSS1500           | Island   | 3.663E-01  | 4.553E-18 |
| <i>SCNN1B</i>    | cg23113963 | 6338   | 16 | TSS1500           | Island   | 3.697E-01  | 1.715E-16 |
| <i>SDHD</i>      | cg14839898 | 6392   | 11 | TSS1500           | N-Shore  | -3.106E-01 | 2.218E-22 |
| <i>SEC31B</i>    | cg20831708 | 25956  | 10 | 5'UTR             | Island   | 3.413E-01  | 2.240E-11 |
| <i>SEPT14</i>    | cg08489623 | 346288 | 7  | Gene body         | Open sea | -3.291E-01 | 3.123E-24 |
| <i>SERPINB10</i> | cg23696618 | 5273   | 18 | Gene body         | Open sea | -3.305E-01 | 9.428E-23 |
| <i>SFRP1</i>     | cg13398291 | 6422   | 8  | 1stExon           | Island   | 3.914E-01  | 3.053E-21 |
| <i>SFRP1</i>     | cg15839448 | 6422   | 8  | 1stExon           | Island   | 3.915E-01  | 7.525E-20 |
| <i>SFRP1</i>     | cg22418909 | 6422   | 8  | 1stExon/5'UTR     | Island   | 4.230E-01  | 3.211E-17 |
| <i>SFRP4</i>     | cg08261094 | 6424   | 7  | 5'UTR/1stExon     | Island   | 3.170E-01  | 7.714E-13 |
| <i>SH3GL3</i>    | cg22946150 | 6457   | 15 | Gene body/1stExon | Island   | 3.847E-01  | 1.965E-13 |
| <i>SHD</i>       | cg26646370 | 56961  | 19 | 5'UTR/1stExon     | Island   | 3.692E-01  | 1.320E-11 |
| <i>SIRPB1</i>    | cg09577651 | 10326  | 20 | TSS200            | Open sea | -3.180E-01 | 1.110E-18 |
| <i>SIX6</i>      | cg19456540 | 4990   | 14 | 1stExon           | Island   | 3.875E-01  | 2.580E-15 |



|          |            |        |    |                 |          |            |           |
|----------|------------|--------|----|-----------------|----------|------------|-----------|
| SLAMF7   | cg07837085 | 57823  | 1  | TSS200          | Open sea | -3.287E-01 | 1.085E-15 |
| SLC12A5  | cg22752533 | 57468  | 20 | 1stExon/5'UTR   | Island   | 3.442E-01  | 7.656E-12 |
| SLC13A5  | cg22040627 | 284111 | 17 | TSS1500         | Island   | 3.064E-01  | 1.448E-17 |
| SLC16A12 | cg09186006 | 387700 | 10 | 1stExon/5'UTR   | Island   | 3.876E-01  | 7.310E-17 |
| SLC16A12 | cg12005098 | 387700 | 10 | TSS200          | Island   | 3.867E-01  | 2.309E-17 |
| SLC17A2  | cg05948654 | 10246  | 6  | 1stExon/5'UTR   | Open sea | -3.275E-01 | 1.435E-29 |
| SLC18A3  | cg11389172 | 6572   | 10 | TSS200          | Island   | 3.860E-01  | 2.751E-14 |
| SLC18A3  | cg14008883 | 6572   | 10 | 1stExon         | Island   | 3.077E-01  | 2.107E-20 |
| SLC22A12 | cg07220939 | 116085 | 11 | 1stExon/5'UTR   | Open sea | -4.035E-01 | 1.581E-20 |
| SLC22A18 | cg03336167 | 5002   | 11 | Gene body       | Island   | 4.728E-01  | 3.485E-22 |
| SLC26A3  | cg04996020 | 1811   | 7  | TSS1500         | Open sea | -3.778E-01 | 4.340E-28 |
| SLC26A4  | cg14646244 | 5172   | 7  | TSS1500         | N-Shore  | -3.649E-01 | 4.293E-18 |
| SLC30A8  | cg23338195 | 169026 | 8  | TSS1500         | Open sea | -3.712E-01 | 2.220E-24 |
| SLC35F3  | cg25437385 | 148641 | 1  | 1stExon         | Island   | 4.330E-01  | 3.470E-19 |
| SLC3A1   | cg02192965 | 6519   | 2  | 1stExon         | Open sea | -3.460E-01 | 1.544E-19 |
| SLC5A7   | cg16232126 | 60482  | 2  | 1stExon/5'UTR   | Island   | 3.158E-01  | 4.637E-12 |
| SLC6A18  | cg19421752 | 348932 | 5  | TSS1500         | N-Shore  | -3.514E-01 | 1.561E-25 |
| SLC6A19  | cg19421752 | 340024 | 5  | 3'UTR           | N-Shore  | -3.514E-01 | 1.561E-25 |
| SLC6A2   | cg04490714 | 6530   | 16 | 1stExon/5'UTR   | Island   | 3.754E-01  | 5.736E-22 |
| SLC6A2   | cg10362591 | 6530   | 16 | TSS1500         | Island   | 3.673E-01  | 5.092E-13 |
| SLC7A2   | cg02786378 | 6542   | 8  | Gene body       | Open sea | -3.007E-01 | 6.581E-27 |
| SLCO1A2  | cg15583072 | 6579   | 12 | 5'UTR           | Open sea | -3.043E-01 | 1.835E-23 |
| SLCO1B1  | cg00995065 | 10599  | 12 | TSS1500         | Open sea | -3.486E-01 | 5.680E-26 |
| SLIT3    | cg11732619 | 6586   | 5  | 5'UTR/1stExon   | Island   | 3.539E-01  | 2.334E-14 |
| SLITRK5  | cg09083627 | 26050  | 13 | TSS1500         | Island   | 4.401E-01  | 1.990E-19 |
| SNAP91   | cg21688264 | 9892   | 6  | Gene body/5'UTR | Island   | 4.350E-01  | 5.897E-23 |
| SNCB     | cg05028467 | 6620   | 5  | 5'UTR           | Island   | 3.054E-01  | 1.541E-11 |
| SND1     | cg15087147 | 27044  | 7  | Gene body       | Island   | 3.029E-01  | 1.642E-12 |
| SNX32    | cg19018097 | 254122 | 11 | TSS200          | Island   | 3.224E-01  | 9.091E-15 |
| SORCS3   | cg16787600 | 22986  | 10 | 1stExon/5'UTR   | Island   | 4.490E-01  | 4.243E-23 |
| SOX1     | cg06675478 | 6656   | 13 | TSS200          | Island   | 3.198E-01  | 1.975E-26 |
| SOX11    | cg08432727 | 6664   | 2  | TSS1500         | N-Shore  | 3.142E-01  | 8.441E-18 |
| SOX11    | cg20008332 | 6664   | 2  | 1stExon         | Island   | 4.334E-01  | 5.979E-30 |
| SPAG6    | cg06908778 | 9576   | 10 | Gene body       | Island   | 3.502E-01  | 3.574E-21 |
| SPATA16  | cg06577725 | 83893  | 3  | 1stExon/5'UTR   | Open sea | -3.185E-01 | 2.175E-18 |
| SPATA17  | cg01727899 | 128153 | 1  | Gene body       | S-Shore  | -3.703E-01 | 1.106E-31 |
| SPATA19  | cg18457737 | 219938 | 11 | Gene body       | Open sea | -3.329E-01 | 3.529E-25 |
| SPDYA    | cg04786857 | 245711 | 2  | 5'UTR           | Island   | 3.289E-01  | 9.646E-16 |
| SPG20    | cg18755783 | 23111  | 13 | 5'UTR           | Island   | 3.294E-01  | 5.366E-14 |
| SPOCK1   | cg12832649 | 6695   | 5  | 5'UTR           | Island   | 3.782E-01  | 1.919E-15 |
| SPON1    | cg02994974 | 10418  | 11 | 1stExon         | Island   | 3.408E-01  | 5.966E-16 |
| SPRR2A   | cg18766755 | 6700   | 1  | 5'UTR           | Open sea | -3.060E-01 | 5.533E-24 |
| SPRR2D   | cg14826683 | 6703   | 1  | TSS1500         | Open sea | -3.118E-01 | 2.628E-21 |
| SPSB4    | cg22036988 | 92369  | 3  | TSS1500         | Island   | 3.381E-01  | 3.272E-12 |
| SRD5A2   | cg19502744 | 6716   | 2  | 1stExon         | Island   | 3.138E-01  | 3.094E-17 |
| SST      | cg02164046 | 6750   | 3  | 1stExon/5'UTR   | Island   | 3.296E-01  | 1.443E-14 |
| SSTR4    | cg17586860 | 6754   | 20 | TSS200          | Island   | 3.830E-01  | 1.189E-20 |
| ST6GAL2  | cg04434339 | 84620  | 2  | 1stExon         | Island   | 3.613E-01  | 3.451E-20 |
| STK38    | cg02964385 | 11329  | 6  | TSS1500         | S-Shore  | -3.578E-01 | 1.596E-12 |
| SYN3     | cg16894211 | 8224   | 22 | TSS1500         | Open sea | -3.489E-01 | 2.414E-23 |
| SYT9     | cg08185661 | 143425 | 11 | 1stExon         | Island   | 3.971E-01  | 6.214E-19 |
| T        | cg17188046 | 6862   | 6  | TSS200          | Island   | 3.160E-01  | 3.491E-15 |
| TAP1     | cg03465320 | 6890   | 6  | Gene body       | S-Shore  | -3.089E-01 | 1.695E-12 |
| TCERG1L  | cg03943081 | 256536 | 10 | TSS1500         | Island   | 3.170E-01  | 1.774E-19 |
| TCP10L   | cg20857253 | 140290 | 21 | 5'UTR           | Open sea | -3.460E-01 | 1.211E-26 |
| TERF2IP  | cg08585897 | 54386  | 16 | TSS1500         | N-Shore  | -3.179E-01 | 8.545E-29 |
| TEX15    | cg20939319 | 56154  | 8  | TSS1500         | Open sea | -3.239E-01 | 7.583E-24 |
| TFPI2    | cg14377593 | 7980   | 7  | TSS200          | Island   | 3.531E-01  | 4.697E-16 |
| TFPI2    | cg23141855 | 7980   | 7  | Gene body       | Island   | 3.248E-01  | 2.367E-16 |
| TFPI2    | cg23686014 | 7980   | 7  | 1stExon         | Island   | 3.237E-01  | 1.403E-14 |
| THRSF    | cg16505204 | 7069   | 11 | TSS1500         | Open sea | -3.263E-01 | 1.415E-30 |
| TIMM8B   | cg14839898 | 26521  | 11 | Gene body       | N-Shore  | -3.106E-01 | 2.218E-22 |
| TLX3     | cg25720804 | 30012  | 5  | 1stExon         | Island   | 4.256E-01  | 1.777E-16 |

|                  |            |        |    |                 |          |            |           |
|------------------|------------|--------|----|-----------------|----------|------------|-----------|
| <i>TM6SF1</i>    | cg14696396 | 53346  | 15 | 1stExon         | Island   | 3.842E-01  | 1.027E-13 |
| <i>TMEFF2</i>    | cg06856528 | 23671  | 2  | 5'UTR/1stExon   | Island   | 3.217E-01  | 1.063E-17 |
| <i>TMEM116</i>   | cg26789453 | 89894  | 12 | TSS1500         | S-Shore  | -3.956E-01 | 8.581E-17 |
| <i>TMEM132E</i>  | cg18338311 | 124842 | 17 | 1stExon/5'UTR   | Island   | 3.864E-01  | 1.609E-17 |
| <i>TMEM179</i>   | cg03734874 | 388021 | 14 | TSS1500         | Island   | 3.396E-01  | 1.418E-16 |
| <i>TMEM74</i>    | cg15042080 | 157753 | 8  | 1stExon/5'UTR   | Island   | 3.182E-01  | 1.161E-09 |
| <i>TMEM90B</i>   | cg16098981 | 79953  | 20 | 5'UTR/1stExon   | Island   | 3.224E-01  | 5.643E-16 |
| <i>TMPRSS11F</i> | cg02936740 | 389208 | 4  | TSS1500         | Open sea | -3.364E-01 | 1.353E-27 |
| <i>TMPRSS3</i>   | cg25608949 | 64699  | 21 | TSS200          | Open sea | -3.118E-01 | 5.645E-19 |
| <i>TNF</i>       | cg11484872 | 7124   | 6  | TSS200          | Open sea | -3.027E-01 | 7.435E-20 |
| <i>TNFRSF10A</i> | cg26530341 | 8797   | 8  | TSS1500         | S-Shore  | -4.320E-01 | 6.482E-32 |
| <i>TPM3</i>      | cg12205230 | 7170   | 1  | TSS1500         | Open sea | -3.102E-01 | 2.011E-25 |
| <i>TPSD1</i>     | cg01375871 | 23430  | 16 | TSS1500         | N-Shelf  | -3.085E-01 | 1.418E-23 |
| <i>TRAM1L1</i>   | cg05807991 | 133022 | 4  | TSS200          | Island   | 3.841E-01  | 5.800E-15 |
| <i>TRDN</i>      | cg14462830 | 10345  | 6  | TSS1500         | Open sea | -3.400E-01 | 2.667E-28 |
| <i>TREML2</i>    | cg19005210 | 79865  | 6  | TSS200          | Open sea | -3.574E-01 | 5.031E-27 |
| <i>TRH</i>       | cg01009664 | 7200   | 3  | 5'UTR/1stExon   | Island   | 4.041E-01  | 2.960E-19 |
| <i>TRHR</i>      | cg22268164 | 7201   | 8  | 1stExon         | Open sea | -3.358E-01 | 1.143E-15 |
| <i>TRHR</i>      | cg26989103 | 7201   | 8  | TSS200          | Open sea | -3.693E-01 | 2.180E-24 |
| <i>TRIM17</i>    | cg23540518 | 51127  | 1  | 1stExon/5'UTR   | Island   | 3.028E-01  | 8.522E-22 |
| <i>TRIM31</i>    | cg00679556 | 11074  | 6  | 5'UTR           | Open sea | -3.494E-01 | 5.799E-16 |
| <i>TRIM31</i>    | cg15238224 | 11074  | 6  | TSS1500         | Open sea | -3.326E-01 | 8.180E-17 |
| <i>TRIM40</i>    | cg09196959 | 135644 | 6  | TSS200          | Open sea | -3.621E-01 | 2.263E-22 |
| <i>TRIM58</i>    | cg07533148 | 25893  | 1  | 1stExon         | Island   | 3.988E-01  | 2.178E-10 |
| <i>TRIM63</i>    | cg13998293 | 84676  | 1  | TSS1500         | Open sea | -3.142E-01 | 1.874E-28 |
| <i>TRPA1</i>     | cg01610488 | 8989   | 8  | TSS200          | Island   | 4.126E-01  | 6.905E-19 |
| <i>TRPM2</i>     | cg08191854 | 7226   | 21 | TSS200          | Open sea | -3.694E-01 | 3.196E-18 |
| <i>TSPAN32</i>   | cg00041575 | 10077  | 11 | TSS1500         | Open sea | -3.699E-01 | 1.016E-18 |
| <i>TUBB8</i>     | cg26675077 | 347688 | 10 | TSS1500/1stExon | S-Shore  | 3.034E-01  | 4.952E-27 |
| <i>TWIST1</i>    | cg20052718 | 7291   | 7  | 1stExon         | Island   | 3.706E-01  | 6.480E-24 |
| <i>TWIST1</i>    | cg20498685 | 7291   | 7  | 3'UTR           | Island   | 3.087E-01  | 1.275E-12 |
| <i>TWIST1</i>    | cg24446548 | 7291   | 7  | 1stExon/5'UTR   | Island   | 4.732E-01  | 2.139E-17 |
| <i>UCN</i>       | cg04527918 | 7349   | 2  | TSS200          | Island   | 3.642E-01  | 3.487E-24 |
| <i>UNC5C</i>     | cg13265789 | 8633   | 4  | TSS1500         | Island   | 3.340E-01  | 1.074E-15 |
| <i>UNC80</i>     | cg14419187 | 285175 | 2  | Gene body       | S-Shore  | 3.224E-01  | 9.637E-13 |
| <i>UTF1</i>      | cg03755123 | 8433   | 10 | TSS1500         | Island   | 3.734E-01  | 1.193E-24 |
| <i>UTF1</i>      | cg09053680 | 8433   | 10 | 1stExon         | Island   | 4.130E-01  | 3.265E-10 |
| <i>VHL</i>       | cg16869108 | 7428   | 3  | Gene body       | S-Shore  | -3.321E-01 | 5.570E-23 |
| <i>VHL</i>       | cg24092914 | 7428   | 3  | Gene body       | S-Shore  | -4.137E-01 | 1.210E-29 |
| <i>VIM</i>       | cg12874092 | 7431   | 10 | Gene body       | Island   | 3.795E-01  | 1.410E-13 |
| <i>VIPR2</i>     | cg18349835 | 7434   | 7  | Gene body       | Island   | 4.633E-01  | 1.917E-27 |
| <i>VSTM1</i>     | cg12315311 | 284415 | 19 | TSS1500         | Open sea | -3.433E-01 | 4.828E-25 |
| <i>VSX1</i>      | cg06151165 | 30813  | 20 | Gene body       | Island   | 3.528E-01  | 2.579E-16 |
| <i>VT11A</i>     | cg17872476 | 143187 | 10 | TSS1500         | N-Shore  | -3.342E-01 | 1.187E-32 |
| <i>WBSCR17</i>   | cg01366419 | 64409  | 7  | TSS1500         | Island   | 3.558E-01  | 6.722E-19 |
| <i>WDR8</i>      | cg26128092 | 49856  | 1  | TSS1500         | Island   | 3.034E-01  | 1.248E-17 |
| <i>WDR86</i>     | cg24068372 | 349136 | 7  | TSS200          | Island   | 3.383E-01  | 1.617E-13 |
| <i>WDR88</i>     | cg26687173 | 126248 | 19 | 1stExon         | Island   | 3.283E-01  | 2.781E-18 |
| <i>WFDC6</i>     | cg12547930 | 140870 | 20 | TSS1500         | Open sea | -3.022E-01 | 1.380E-12 |
| <i>WIF1</i>      | cg19427610 | 11197  | 12 | 5'UTR/1stExon   | Island   | 3.071E-01  | 2.416E-13 |
| <i>WIPI2</i>     | cg20592700 | 26100  | 7  | 1stExon         | Island   | -3.414E-01 | 1.747E-29 |
| <i>WNT2</i>      | cg01830294 | 7472   | 7  | TSS200          | Island   | 3.172E-01  | 3.427E-16 |
| <i>WT1</i>       | cg01693350 | 7490   | 11 | Gene body       | Island   | 3.445E-01  | 1.475E-11 |
| <i>WT1</i>       | cg13641903 | 7490   | 11 | Gene body       | Island   | 3.826E-01  | 6.844E-20 |
| <i>ZDHHC6</i>    | cg17872476 | 64429  | 10 | 5'UTR           | N-Shore  | -3.342E-01 | 1.187E-32 |
| <i>ZFP82</i>     | cg25886284 | 284406 | 19 | 5'UTR/1stExon   | Island   | 3.594E-01  | 1.413E-15 |
| <i>ZNF135</i>    | cg16638540 | 7694   | 19 | TSS200          | Island   | 3.790E-01  | 1.252E-19 |
| <i>ZNF148</i>    | cg15705999 | 7707   | 3  | 5'UTR           | Island   | -3.380E-01 | 6.262E-21 |
| <i>ZNF154</i>    | cg08668790 | 7710   | 19 | TSS200          | S-Shore  | 3.696E-01  | 8.465E-20 |
| <i>ZNF154</i>    | cg21790626 | 7710   | 19 | 5'UTR/1stExon   | Island   | 4.611E-01  | 1.711E-23 |
| <i>ZNF22</i>     | cg00899659 | 7570   | 10 | TSS1500         | N-Shore  | -3.269E-01 | 2.609E-19 |
| <i>ZNF331</i>    | cg15205507 | 55422  | 19 | 1stExon/5'UTR   | Island   | 3.180E-01  | 4.211E-15 |
| <i>ZNF385D</i>   | cg18267381 | 79750  | 3  | 1stExon/5'UTR   | Open sea | 3.003E-01  | 8.824E-16 |

|         |            |        |    |                  |          |            |           |
|---------|------------|--------|----|------------------|----------|------------|-----------|
| ZNF415  | cg10332700 | 55786  | 19 | 5'UTR/1stExon    | Island   | 3.673E-01  | 1.142E-15 |
| ZNF454  | cg03355526 | 285676 | 5  | 5'UTR            | Island   | 3.549E-01  | 8.995E-18 |
| ZNF454  | cg23037403 | 285676 | 5  | TSS200           | Island   | 3.234E-01  | 3.132E-18 |
| ZNF540  | cg03975694 | 163255 | 19 | 5'UTR/1stExon    | S-Shelf  | 3.270E-01  | 3.554E-17 |
| ZNF540  | cg27389185 | 163255 | 19 | TSS200           | S-Shore  | 3.076E-01  | 1.726E-25 |
| ZNF542  | cg26309134 | 147947 | 19 | TSS200/Gene body | Island   | 4.279E-01  | 2.256E-21 |
| ZNF610  | cg07703337 | 162963 | 19 | 5'UTR/TSS1500    | Open sea | -3.019E-01 | 4.727E-21 |
| ZNF619  | cg21942438 | 285267 | 3  | TSS1500          | N-Shore  | -3.068E-01 | 1.017E-21 |
| ZNF625  | cg17892556 | 90589  | 19 | 1stExon/5'UTR    | Island   | 4.006E-01  | 1.134E-13 |
| ZNF660  | cg22598028 | 285349 | 3  | 5'UTR/1stExon    | Island   | 3.461E-01  | 1.568E-15 |
| ZNF671  | cg19246110 | 79891  | 19 | 1stExon/5'UTR    | Island   | 4.092E-01  | 1.620E-18 |
| ZNF677  | cg16708981 | 342926 | 19 | TSS1500          | S-Shore  | 3.020E-01  | 1.277E-16 |
| ZNF677  | cg18335068 | 342926 | 19 | 5'UTR            | Island   | 3.302E-01  | 8.458E-20 |
| ZNF781  | cg25875213 | 163115 | 19 | 5'UTR/1stExon    | Island   | 3.681E-01  | 1.916E-18 |
| ZNF804B | cg27319898 | 219578 | 7  | 1stExon/5'UTR    | Island   | 3.011E-01  | 3.280E-13 |
| ZSCAN1  | cg21331821 | 284312 | 19 | TSS1500          | Island   | 3.551E-01  | 3.123E-16 |
| ZSCAN18 | cg06243556 | 65982  | 19 | Gene body/5'UTR  | Island   | 3.249E-01  | 1.956E-13 |
| NA      | cg13912117 | NA     | 8  | NA               | Island   | 5.300E-01  | 5.229E-31 |
| NA      | cg02255732 | NA     | 11 | NA               | Open sea | -3.056E-01 | 1.068E-24 |
| NA      | cg25538571 | NA     | 8  | NA               | Open sea | -3.015E-01 | 5.398E-18 |

<sup>1</sup>Probe IDs for the Infinium HumanMethylation27 BeadChip (Illumina). <sup>2</sup>TSS1500, from transcription start site (TSS) to 1500 bp upstream of it; TSS200, from TSS to 200 bp upstream of TSS; UTR, untranslated region; Gene body, second exon and downstream on the RefSeq database (<http://www.ncbi.nlm.nih.gov/refseq/>). <sup>3</sup>N-Shelf, 2000 bp region 5' adjacent to N-Shore; N-Shore, 2000 bp region 5' adjacent to CpG island; S-Shore, 2000 bp region 3' adjacent to CpG island; S-Shelf, 2000 bp region 3' adjacent to S-Shore based on the UCSC Genome Browser (<https://genome.ucsc.edu/>). NA, not applicable (designed in the intergenic regions).

**Supplementary Table 5.** Correlations between epigenomic clustering based on DNA methylation profiles at the precancerous stage and clinicopathological parameters of the 66 established gastric carcinomas for which whole-exome analysis had been performed

| Clinicopathological parameters                           | Cluster A<br>(n=12) | Cluster B1<br>(n=12) | Cluster B2<br>(n=42) | <i>P</i> <sup>4</sup> |
|----------------------------------------------------------|---------------------|----------------------|----------------------|-----------------------|
| <b>Patients</b>                                          |                     |                      |                      |                       |
| Age (years)                                              |                     |                      |                      |                       |
| 65 or older                                              | 7                   | 4                    | 26                   | 0.251                 |
| Younger than 65                                          | 5                   | 8                    | 16                   |                       |
| Gender                                                   |                     |                      |                      |                       |
| Male                                                     | 10                  | 10                   | 29                   | 0.551                 |
| Female                                                   | 2                   | 2                    | 13                   |                       |
| <i>Helicobacter pylori</i> infection                     |                     |                      |                      |                       |
| Negative                                                 | 6                   | 5                    | 15                   | 0.819                 |
| Positive                                                 | 6                   | 7                    | 25                   |                       |
| Unknown                                                  | 0                   | 0                    | 2                    |                       |
| <b>Gastric carcinomas</b>                                |                     |                      |                      |                       |
| Predominant histological classification <sup>1</sup>     |                     |                      |                      |                       |
| Differentiated (pap, tub1 and tub2)                      | 10                  | 2                    | 22                   | <u>0.003</u>          |
| Undifferentiated (sig, por1 and por2)                    | 1                   | 9                    | 19                   |                       |
| Mucin producing                                          | 1                   | 1                    | 1                    |                       |
| Most aggressive histological classification <sup>2</sup> |                     |                      |                      |                       |
| Differentiated (pap, tub1 and tub2)                      | 6                   | 1                    | 9                    | 0.056                 |
| Undifferentiated (sig, por1 and por2)                    | 6                   | 11                   | 33                   |                       |
| Mucin producing                                          | 0                   | 0                    | 0                    |                       |
| pT category <sup>3</sup>                                 |                     |                      |                      |                       |
| pT1-pT2                                                  | 4                   | 0                    | 6                    | 0.071                 |
| pT3-pT4                                                  | 8                   | 12                   | 36                   |                       |
| Pathological tumor node metastasis stage <sup>3</sup>    |                     |                      |                      |                       |
| I A- I B                                                 | 4                   | 0                    | 5                    | 0.187                 |
| II A- II B                                               | 1                   | 3                    | 6                    |                       |
| III A-IV                                                 | 7                   | 9                    | 31                   |                       |

pap, papillary adenocarcinoma; tub1, tubular adenocarcinoma (well differentiated type); tub2, tubular adenocarcinoma (moderately differentiated type); por1, poorly differentiated adenocarcinoma (solid type); por2, poorly differentiated adenocarcinoma (non-solid type); sig, signet ring cell carcinoma; muc, mucinous adenocarcinoma.

<sup>1</sup>If the tumor showed heterogeneity, findings in the predominant area were described. <sup>2</sup>If the tumor showed heterogeneity, the most aggressive features of the tumor were described. <sup>3</sup>Based on The Union for International Cancer Control classification (Ref. 20). <sup>4</sup>*P* values of less than 0.05 have been underlined (Fisher's exact test).

**Supplementary Table 6.** The numbers of genes showing genomic aberrations (single-nucleotide variants [SNVs] and insertions/deletions [indels]) in each of the epigenomic clusters

|                           | Cluster A (n=12)                 |                                             | Cluster B1 (n=12)                |                                             | Cluster B2 (n=42)                |                                             | <i>P</i> <sup>2</sup> |
|---------------------------|----------------------------------|---------------------------------------------|----------------------------------|---------------------------------------------|----------------------------------|---------------------------------------------|-----------------------|
|                           | Number of all detected mutations | Number of mutations per case [median (IQR)] | Number of all detected mutations | Number of mutations per case [median (IQR)] | Number of all detected mutations | Number of mutations per case [median (IQR)] |                       |
| SNVs                      | 15007                            | 446.0 (347.3, 615.3)                        | 7678                             | 356.0 (108.3, 872.8)                        | 22690                            | 379.0 (207.5, 562.3)                        | 0.659                 |
| Non-synonymous SNV        | 3790                             | 120.0 (72.0, 187.8)                         | 2176                             | 99.5 (29.5, 229.8)                          | 6300                             | 98.5 (63.8, 161.8)                          | 0.742                 |
| Synonymous SNVs           | 1670                             | 45.0 (32.3, 80.8)                           | 901                              | 33.5 (9.8, 94.8)                            | 2504                             | 40.5 (25.8, 60.0)                           | 0.600                 |
| Other SNVs <sup>1</sup>   | 9547                             | 257.0 (205.8, 427.0)                        | 4601                             | 227.5 (69.0, 548.3)                         | 13886                            | 237.0 (126.3, 376.8)                        | 0.705                 |
| Indels                    | 2451                             | 26.0 (21.0, 37.0)                           | 1479                             | 19.0 (11.3, 24.0)                           | 2907                             | 22.5 (15.8, 31.3)                           | 0.141                 |
| Frameshift indels         | 645                              | 5.5 (3.3, 7.0)                              | 485                              | 3.0 (1.0, 5.8)                              | 852                              | 4.0 (2.8, 6.5)                              | 0.200                 |
| Non frameshift indels     | 74                               | 1.5 (1.0, 5.0)                              | 47                               | 0.5 (0.0, 2.8)                              | 101                              | 1.5 (0.0, 3.0)                              | 0.423                 |
| Other indels <sup>1</sup> | 1732                             | 19.0 (14.0, 25.8)                           | 947                              | 13.5 (11.0, 20.3)                           | 1954                             | 16.5 (12.8, 22.0)                           | 0.265                 |

IQR: inter quartile range. <sup>1</sup>Detected in introns or non-coding regions. <sup>2</sup>Kruskal-Wallis test.

**Supplementary Table 7.** Recurrently mutated genes showing single-nucleotide variants (SNVs) or insertions/deletions (indels), where protein function was disrupted due to at least one genetic aberration (SNVs or indels), in gastric adenocarcinomas belonging to Clusters A, B1 and B2

(A) Genes showing genetic aberrations (SNVs or indels) in more than 15% of (2 or more) cancers belonging to Cluster A (n=12)

| Gene symbol      | Chromosome | National Center for<br>Biotechnology Information<br>(NCBI) Gene ID | Number of patients<br>showing genetic<br>aberrations | Number of genetic<br>aberrations |        | Predicted protein function |          |          |
|------------------|------------|--------------------------------------------------------------------|------------------------------------------------------|----------------------------------|--------|----------------------------|----------|----------|
|                  |            |                                                                    |                                                      |                                  |        | SNVs <sup>1</sup>          |          | Indels   |
|                  |            |                                                                    |                                                      | SNVs                             | Indels | SIFT                       | Polyphen | SIFT     |
| <i>TP53</i>      | 17         | 7157                                                               | 8                                                    | 8                                | 1      | 0.000                      | 1.000    | damaging |
| <i>TTN</i>       | 2          | 7273                                                               | 8                                                    | 28                               | 3      | 0.000                      | 1.000    | damaging |
| <i>LRP1B</i>     | 2          | 53353                                                              | 7                                                    | 22                               | 2      | 0.000                      | 0.999    | NA       |
| <i>FSIP2</i>     | 2          | 401024                                                             | 6                                                    | 5                                | 1      | 0.070                      | NA       | damaging |
| <i>OBSCN</i>     | 1          | 84033                                                              | 6                                                    | 12                               | 2      | 0.010                      | 1.000    | damaging |
| <i>PAX1</i>      | 20         | 5075                                                               | 5                                                    | 5                                | 0      | 0.000                      | 0.999    | -        |
| <i>RYR2</i>      | 1          | 6262                                                               | 5                                                    | 16                               | 2      | 0.000                      | 1.000    | NA       |
| <i>CACNA1C</i>   | 12         | 775                                                                | 5                                                    | 9                                | 0      | 0.000                      | 1.000    | -        |
| <i>CHL1</i>      | 3          | 10752                                                              | 5                                                    | 5                                | 0      | 0.000                      | 1.000    | -        |
| <i>DCC</i>       | 18         | 1630                                                               | 5                                                    | 9                                | 0      | 0.000                      | 1.000    | -        |
| <i>NRG1</i>      | 8          | 3084                                                               | 5                                                    | 5                                | 1      | NA                         | NA       | damaging |
| <i>ABCC4</i>     | 13         | 10257                                                              | 4                                                    | 5                                | 1      | 0.000                      | 0.983    | NA       |
| <i>PAPPA2</i>    | 1          | 60676                                                              | 4                                                    | 4                                | 1      | 0.030                      | 1.000    | NA       |
| <i>UNC5D</i>     | 8          | 137970                                                             | 4                                                    | 4                                | 0      | 0.000                      | 0.999    | -        |
| <i>ZFX4</i>      | 8          | 79776                                                              | 4                                                    | 5                                | 0      | 0.010                      | 0.995    | -        |
| <i>FLG</i>       | 1          | 2312                                                               | 4                                                    | 6                                | 0      | 0.000                      | 0.974    | -        |
| <i>NALCN</i>     | 13         | 259232                                                             | 4                                                    | 6                                | 0      | 0.000                      | 0.969    | -        |
| <i>ABCA13</i>    | 7          | 154664                                                             | 4                                                    | 4                                | 1      | 0.040                      | 0.748    | damaging |
| <i>PTCHD2</i>    | 1          | 57540                                                              | 4                                                    | 7                                | 0      | 0.000                      | 0.998    | -        |
| <i>ADAM12</i>    | 10         | 8038                                                               | 4                                                    | 5                                | 0      | 0.020                      | 0.983    | -        |
| <i>AGAP3</i>     | 7          | 116988                                                             | 4                                                    | 4                                | 0      | 0.000                      | 0.997    | -        |
| <i>APC</i>       | 5          | 324                                                                | 4                                                    | 2                                | 2      | NA                         | NA       | damaging |
| <i>ARID1A</i>    | 1          | 8289                                                               | 4                                                    | 2                                | 2      | 1.000                      | NA       | damaging |
| <i>CDH9</i>      | 5          | 1007                                                               | 4                                                    | 3                                | 1      | NA                         | 0.581    | damaging |
| <i>COL12A1</i>   | 6          | 1303                                                               | 4                                                    | 9                                | 1      | 0.000                      | 1.000    | NA       |
| <i>COL22A1</i>   | 8          | 169044                                                             | 4                                                    | 7                                | 1      | NA                         | 0.013    | damaging |
| <i>EGFR</i>      | 7          | 1956                                                               | 4                                                    | 7                                | 0      | 0.000                      | 0.980    | -        |
| <i>KCNQ3</i>     | 8          | 3786                                                               | 4                                                    | 6                                | 1      | 0.040                      | 0.068    | damaging |
| <i>LILRB2</i>    | 19         | 10288                                                              | 4                                                    | 4                                | 0      | 0.000                      | 0.976    | -        |
| <i>LOXHD1</i>    | 18         | 125336                                                             | 4                                                    | 4                                | 0      | 0.020                      | 0.875    | -        |
| <i>LRRK2</i>     | 12         | 120892                                                             | 4                                                    | 4                                | 1      | NA                         | NA       | damaging |
| <i>MYO15A</i>    | 17         | 51168                                                              | 4                                                    | 4                                | 2      | 0.140                      | 0.815    | damaging |
| <i>NIPBL</i>     | 5          | 25836                                                              | 4                                                    | 5                                | 2      | 0.040                      | 0.970    | damaging |
| <i>PCDH15</i>    | 10         | 65217                                                              | 4                                                    | 6                                | 0      | 0.000                      | 0.998    | -        |
| <i>PCLO</i>      | 7          | 27445                                                              | 4                                                    | 6                                | 0      | 0.000                      | 0.999    | -        |
| <i>POSTN</i>     | 13         | 10631                                                              | 4                                                    | 4                                | 2      | NA                         | NA       | damaging |
| <i>PTF1A</i>     | 10         | 256297                                                             | 4                                                    | 4                                | 0      | 0.000                      | 1.000    | -        |
| <i>SDK1</i>      | 7          | 221935                                                             | 4                                                    | 11                               | 0      | 0.000                      | 1.000    | -        |
| <i>SFI1</i>      | 22         | 9814                                                               | 4                                                    | 6                                | 0      | 0.000                      | 1.000    | -        |
| <i>SULF2</i>     | 20         | 55959                                                              | 4                                                    | 4                                | 0      | 0.000                      | 0.999    | -        |
| <i>UNC13A</i>    | 19         | 23025                                                              | 4                                                    | 5                                | 0      | 0.010                      | 0.999    | -        |
| <i>UTRN</i>      | 6          | 7402                                                               | 4                                                    | 6                                | 3      | 0.490                      | 0.018    | damaging |
| <i>ACSS2</i>     | 20         | 55902                                                              | 3                                                    | 2                                | 1      | 0.000                      | 0.999    | NA       |
| <i>ADCYAP1R1</i> | 7          | 117                                                                | 3                                                    | 4                                | 1      | 0.000                      | 1.000    | NA       |
| <i>ANKRD26</i>   | 10         | 22852                                                              | 3                                                    | 7                                | 0      | 0.010                      | 0.997    | -        |
| <i>ATP2B2</i>    | 3          | 491                                                                | 3                                                    | 3                                | 1      | 0.000                      | 0.998    | damaging |
| <i>ATP4A</i>     | 19         | 495                                                                | 3                                                    | 5                                | 0      | 0.010                      | 0.915    | -        |
| <i>ATRNL1</i>    | 10         | 26033                                                              | 3                                                    | 4                                | 1      | 0.010                      | 0.970    | NA       |
| <i>CAPN12</i>    | 19         | 147968                                                             | 3                                                    | 3                                | 0      | 0.010                      | 0.854    | -        |
| <i>CNTN1</i>     | 12         | 1272                                                               | 3                                                    | 3                                | 0      | 0.000                      | 1.000    | -        |
| <i>COL11A1</i>   | 1          | 1301                                                               | 3                                                    | 8                                | 1      | 0.000                      | 1.000    | NA       |
| <i>CSMD2</i>     | 1          | 114784                                                             | 3                                                    | 10                               | 2      | 0.030                      | 1.000    | damaging |
| <i>CSMD3</i>     | 8          | 114788                                                             | 3                                                    | 9                                | 0      | 0.000                      | 1.000    | -        |
| <i>DMXL2</i>     | 15         | 23312                                                              | 3                                                    | 3                                | 1      | 0.010                      | 0.999    | NA       |
| <i>DNAH7</i>     | 2          | 56171                                                              | 3                                                    | 4                                | 1      | 0.010                      | 0.995    | damaging |
| <i>DNAH8</i>     | 6          | 1769                                                               | 3                                                    | 4                                | 2      | 0.000                      | 1.000    | damaging |
| <i>ETV1</i>      | 7          | 2115                                                               | 3                                                    | 3                                | 0      | 0.030                      | 0.999    | -        |
| <i>FAT3</i>      | 11         | 120114                                                             | 3                                                    | 7                                | 0      | 0.000                      | 0.881    | -        |
| <i>FRAS1</i>     | 4          | 80144                                                              | 3                                                    | 5                                | 0      | 0.000                      | 0.999    | -        |
| <i>KCNB2</i>     | 8          | 9312                                                               | 3                                                    | 4                                | 1      | 0.000                      | 0.993    | damaging |
| <i>LAMC1</i>     | 1          | 3915                                                               | 3                                                    | 5                                | 0      | 0.000                      | 0.999    | -        |
| <i>LAMC3</i>     | 9          | 10319                                                              | 3                                                    | 3                                | 1      | 0.040                      | 0.999    | damaging |

|                 |    |        |   |   |   |       |       |          |
|-----------------|----|--------|---|---|---|-------|-------|----------|
| <i>LDLR</i>     | 19 | 3949   | 3 | 4 | 0 | 0.000 | 0.998 | -        |
| <i>LRP12</i>    | 8  | 29967  | 3 | 1 | 2 | 0.000 | 0.990 | damaging |
| <i>LRRN3</i>    | 7  | 54674  | 3 | 3 | 0 | 0.000 | 0.999 | -        |
| <i>MUC5B</i>    | 11 | 727897 | 3 | 5 | 1 | 0.000 | 0.987 | damaging |
| <i>NDST4</i>    | 4  | 64579  | 3 | 3 | 1 | 0.000 | 0.995 | NA       |
| <i>NEB</i>      | 2  | 4703   | 3 | 8 | 2 | 0.000 | 0.999 | NA       |
| <i>NOS3</i>     | 7  | 4846   | 3 | 3 | 0 | 0.000 | 1.000 | -        |
| <i>PCDHA2</i>   | 5  | 56146  | 3 | 4 | 1 | 0.000 | 0.999 | damaging |
| <i>POU4F2</i>   | 4  | 5458   | 3 | 2 | 1 | 0.000 | 0.999 | damaging |
| <i>PPP2R3A</i>  | 3  | 5523   | 3 | 2 | 1 | 0.000 | 0.997 | NA       |
| <i>SETBP1</i>   | 18 | 26040  | 3 | 4 | 0 | 0.030 | 0.933 | -        |
| <i>SI</i>       | 3  | 6476   | 3 | 3 | 1 | 0.000 | 1.000 | NA       |
| <i>TSPEAR</i>   | 21 | 54084  | 3 | 4 | 1 | 0.030 | 0.990 | NA       |
| <i>UNC13C</i>   | 15 | 440279 | 3 | 7 | 2 | 0.000 | 0.999 | NA       |
| <i>UNC79</i>    | 14 | 57578  | 3 | 4 | 0 | 0.030 | 0.994 | -        |
| <i>APOBEC3H</i> | 22 | 164668 | 3 | 7 | 1 | 0.020 | 0.750 | damaging |
| <i>CADM2</i>    | 3  | 253559 | 3 | 3 | 0 | 0.040 | 0.987 | -        |
| <i>EFCAB6</i>   | 22 | 64800  | 3 | 6 | 0 | 0.000 | 1.000 | -        |
| <i>FLI1</i>     | 11 | 2313   | 3 | 3 | 0 | 0.000 | 0.958 | -        |
| <i>ABCB5</i>    | 7  | 340273 | 3 | 4 | 0 | 0.000 | 0.959 | -        |
| <i>ACTN2</i>    | 1  | 88     | 3 | 3 | 0 | 0.000 | 0.992 | -        |
| <i>ADAM33</i>   | 20 | 80332  | 3 | 7 | 1 | 0.000 | 0.995 | NA       |
| <i>ALDH1L1</i>  | 3  | 10840  | 3 | 2 | 1 | NA    | NA    | damaging |
| <i>ANK2</i>     | 4  | 287    | 3 | 2 | 2 | NA    | NA    | damaging |
| <i>ANKRD30B</i> | 18 | 374860 | 3 | 2 | 2 | 0.350 | 0.060 | damaging |
| <i>ATG2B</i>    | 14 | 55102  | 3 | 2 | 1 | NA    | NA    | damaging |
| <i>BCL6B</i>    | 17 | 255877 | 3 | 3 | 0 | 0.000 | 0.986 | -        |
| <i>BRPF3</i>    | 6  | 27154  | 3 | 5 | 1 | 0.000 | 0.999 | NA       |
| <i>CACNA2D4</i> | 12 | 93589  | 3 | 6 | 0 | 0.030 | 0.999 | -        |
| <i>CEMIP</i>    | 15 | 57214  | 3 | 5 | 0 | 0.030 | 0.996 | -        |
| <i>COL18A1</i>  | 21 | 80781  | 3 | 5 | 3 | 0.250 | 0.462 | damaging |
| <i>COPG1</i>    | 3  | 22820  | 3 | 4 | 0 | 0.000 | 0.993 | -        |
| <i>CTCF</i>     | 16 | 10664  | 3 | 3 | 1 | 0.000 | 0.998 | damaging |
| <i>CTNNA3</i>   | 10 | 29119  | 3 | 2 | 1 | 0.000 | 0.954 | NA       |
| <i>DBN1</i>     | 5  | 1627   | 3 | 4 | 0 | 0.010 | 0.992 | -        |
| <i>DHX16</i>    | 6  | 8449   | 3 | 2 | 1 | 0.000 | 0.883 | damaging |
| <i>DNAH1</i>    | 3  | 25981  | 3 | 6 | 2 | 0.010 | 0.978 | NA       |
| <i>DNAH10</i>   | 12 | 196385 | 3 | 7 | 0 | 0.000 | 0.995 | -        |
| <i>DOCK10</i>   | 2  | 55619  | 3 | 5 | 3 | 0.060 | 0.530 | damaging |
| <i>DOCK9</i>    | 13 | 23348  | 3 | 3 | 0 | 0.000 | 0.994 | -        |
| <i>EHD4</i>     | 15 | 30844  | 3 | 3 | 0 | 0.000 | 0.999 | -        |
| <i>EP400</i>    | 12 | 57634  | 3 | 7 | 0 | 0.000 | 0.998 | -        |
| <i>EPHA5</i>    | 4  | 2044   | 3 | 5 | 0 | 0.010 | 0.954 | -        |
| <i>ERBB2</i>    | 17 | 2064   | 3 | 4 | 0 | 0.000 | 1.000 | -        |
| <i>ERBB3</i>    | 12 | 2065   | 3 | 3 | 0 | 0.000 | 1.000 | -        |
| <i>FNDC1</i>    | 6  | 84624  | 3 | 6 | 0 | 0.010 | 1.000 | -        |
| <i>FREM1</i>    | 9  | 158326 | 3 | 4 | 1 | 0.000 | 0.866 | damaging |
| <i>FRY</i>      | 13 | 10129  | 3 | 5 | 0 | 0.000 | 0.995 | -        |
| <i>FSTL4</i>    | 5  | 23105  | 3 | 3 | 0 | 0.000 | 0.936 | -        |
| <i>HEATR5B</i>  | 2  | 54497  | 3 | 4 | 0 | 0.000 | 1.000 | -        |
| <i>HTT</i>      | 4  | 3064   | 3 | 7 | 1 | 0.000 | 0.995 | NA       |
| <i>IGF2BP3</i>  | 7  | 10643  | 3 | 5 | 0 | 0.010 | 0.998 | -        |
| <i>IGSF9B</i>   | 11 | 22997  | 3 | 4 | 1 | 0.000 | 0.998 | damaging |
| <i>KIAA1429</i> | 8  | 25962  | 3 | 3 | 0 | 0.010 | 0.873 | -        |
| <i>LARP1</i>    | 5  | 23367  | 3 | 4 | 1 | NA    | NA    | damaging |
| <i>LPIN3</i>    | 20 | 64900  | 3 | 1 | 2 | NA    | NA    | damaging |
| <i>LRRC7</i>    | 1  | 57554  | 3 | 3 | 0 | 0.000 | 0.885 | -        |
| <i>MICALL2</i>  | 7  | 79778  | 3 | 3 | 0 | 0.000 | 0.965 | -        |
| <i>MUC16</i>    | 19 | 94025  | 3 | 9 | 0 | 0.000 | 0.961 | -        |
| <i>MUC6</i>     | 11 | 4588   | 3 | 3 | 1 | 0.160 | 0.031 | damaging |
| <i>MYH6</i>     | 14 | 4624   | 3 | 3 | 0 | 0.000 | 1.000 | -        |
| <i>NCAN</i>     | 19 | 1463   | 3 | 3 | 0 | 0.000 | 0.998 | -        |
| <i>NCOR2</i>    | 12 | 9612   | 3 | 5 | 0 | 0.010 | 0.997 | -        |
| <i>NELFCD</i>   | 20 | 51497  | 3 | 3 | 0 | 0.020 | 0.972 | -        |
| <i>NOTCH3</i>   | 19 | 4854   | 3 | 3 | 0 | 0.010 | 0.998 | -        |
| <i>PCM1</i>     | 8  | 5108   | 3 | 5 | 1 | 0.480 | 0.016 | damaging |
| <i>PCNT</i>     | 21 | 5116   | 3 | 3 | 0 | 0.010 | 0.982 | -        |
| <i>PCSK5</i>    | 9  | 5125   | 3 | 3 | 1 | 0.100 | 0.988 | damaging |
| <i>PGAP1</i>    | 2  | 80055  | 3 | 2 | 1 | NA    | NA    | damaging |
| <i>PLCB4</i>    | 20 | 5332   | 3 | 4 | 0 | 0.000 | 1.000 | -        |
| <i>PLCE1</i>    | 10 | 51196  | 3 | 2 | 1 | 0.000 | 0.999 | NA       |
| <i>PLEC</i>     | 8  | 5339   | 3 | 8 | 0 | 0.000 | 0.998 | -        |

|          |    |        |   |   |   |       |       |          |
|----------|----|--------|---|---|---|-------|-------|----------|
| PLXND1   | 3  | 23129  | 3 | 2 | 2 | NA    | NA    | damaging |
| PTCH1    | 9  | 5727   | 3 | 6 | 0 | 0.010 | 0.999 | -        |
| PTPRZ1   | 7  | 5803   | 3 | 3 | 0 | 0.000 | 0.999 | -        |
| RIMS1    | 6  | 22999  | 3 | 8 | 0 | 0.000 | 1.000 | -        |
| SENP7    | 3  | 57337  | 3 | 5 | 1 | 0.000 | 1.000 | damaging |
| SNAPC4   | 9  | 6621   | 3 | 6 | 0 | 0.010 | 0.992 | -        |
| SVEP1    | 9  | 79987  | 3 | 7 | 1 | 0.000 | 0.999 | damaging |
| TG       | 8  | 7038   | 3 | 4 | 1 | 1.000 | 0.000 | damaging |
| TRAK2    | 2  | 66008  | 3 | 2 | 1 | 0.010 | 0.996 | damaging |
| UBR2     | 6  | 23304  | 3 | 2 | 1 | NA    | NA    | damaging |
| UBR5     | 8  | 51366  | 3 | 8 | 2 | 0.040 | 0.990 | NA       |
| VWA8     | 13 | 23078  | 3 | 6 | 0 | 0.030 | 0.926 | -        |
| WDR49    | 3  | 151790 | 3 | 3 | 1 | NA    | NA    | damaging |
| ZFHX3    | 16 | 463    | 3 | 5 | 1 | 0.300 | 0.758 | damaging |
| ZFP64    | 20 | 55734  | 3 | 5 | 1 | 0.010 | NA    | damaging |
| ZIC4     | 3  | 84107  | 3 | 3 | 0 | 0.010 | 0.998 | -        |
| ABLIM1   | 10 | 3983   | 2 | 4 | 0 | 0.000 | 1.000 | -        |
| ACACB    | 12 | 32     | 2 | 4 | 1 | 0.000 | 1.000 | NA       |
| ACP1     | 2  | 52     | 2 | 2 | 0 | 0.000 | 0.969 | -        |
| ADCK5    | 8  | 203054 | 2 | 3 | 0 | 0.000 | 1.000 | -        |
| AJAP1    | 1  | 55966  | 2 | 2 | 0 | 0.000 | 0.977 | -        |
| ANGPT2   | 8  | 285    | 2 | 2 | 0 | 0.000 | 1.000 | -        |
| AP4B1    | 1  | 10717  | 2 | 1 | 1 | 0.000 | 0.994 | NA       |
| APC2     | 19 | 10297  | 2 | 4 | 0 | 0.000 | 0.995 | -        |
| ARHGEF10 | 8  | 9639   | 2 | 3 | 1 | 0.000 | 1.000 | neutral  |
| ARHGEF40 | 14 | 55701  | 2 | 5 | 0 | 0.000 | 0.987 | -        |
| B4GALNT1 | 12 | 2583   | 2 | 1 | 1 | 0.010 | 0.987 | NA       |
| BCAR1    | 16 | 9564   | 2 | 3 | 0 | 0.000 | 0.999 | -        |
| BTBD16   | 10 | 118663 | 2 | 2 | 0 | 0.000 | 0.917 | -        |
| C9orf172 | 9  | 389813 | 2 | 2 | 0 | 0.000 | 0.967 | -        |
| CACNA2D1 | 7  | 781    | 2 | 6 | 0 | 0.000 | 0.998 | -        |
| CCDC88A  | 2  | 55704  | 2 | 1 | 2 | 0.020 | 0.861 | NA       |
| CCR9     | 3  | 10803  | 2 | 3 | 0 | 0.010 | 0.967 | -        |
| CCT4     | 2  | 10575  | 2 | 1 | 2 | 0.000 | 0.906 | NA       |
| CD276    | 15 | 80381  | 2 | 2 | 0 | 0.000 | 0.997 | -        |
| CDC42BPG | 11 | 55561  | 2 | 2 | 0 | 0.000 | 0.998 | -        |
| CDK12    | 17 | 51755  | 2 | 3 | 0 | 0.020 | 0.998 | -        |
| CDK5RAP2 | 9  | 55755  | 2 | 4 | 1 | 0.020 | 0.999 | damaging |
| CELA3B   | 1  | 23436  | 2 | 3 | 0 | 0.000 | 0.926 | -        |
| CFAP61   | 20 | 26074  | 2 | 4 | 0 | 0.000 | 0.949 | -        |
| CHD3     | 17 | 1107   | 2 | 1 | 1 | 0.000 | 0.998 | NA       |
| CHMP2A   | 19 | 27243  | 2 | 1 | 1 | 0.000 | 0.989 | NA       |
| CMTM5    | 14 | 116173 | 2 | 2 | 0 | 0.000 | 0.998 | -        |
| CTNNA1   | 5  | 1495   | 2 | 2 | 0 | 0.000 | 0.859 | -        |
| CYTH1    | 17 | 9267   | 2 | 3 | 0 | 0.000 | 1.000 | -        |
| DCTN2    | 12 | 10540  | 2 | 2 | 0 | 0.030 | 1.000 | -        |
| DHTKD1   | 10 | 55526  | 2 | 2 | 0 | 0.000 | 1.000 | -        |
| DNAJC13  | 3  | 23317  | 2 | 4 | 0 | 0.000 | 0.894 | -        |
| DOCK6    | 19 | 57572  | 2 | 3 | 0 | 0.000 | 0.999 | -        |
| DPP10    | 2  | 57628  | 2 | 3 | 0 | 0.000 | 0.999 | -        |
| DPYSL3   | 5  | 1809   | 2 | 3 | 0 | 0.010 | 0.987 | -        |
| DSCAML1  | 11 | 57453  | 2 | 3 | 1 | 0.000 | 0.987 | NA       |
| DYNC112  | 2  | 1781   | 2 | 2 | 0 | 0.010 | 0.886 | -        |
| EARS2    | 16 | 124454 | 2 | 2 | 0 | 0.010 | 0.974 | -        |
| EFEMP1   | 2  | 2202   | 2 | 2 | 0 | 0.000 | 1.000 | -        |
| EPHB3    | 3  | 2049   | 2 | 3 | 0 | 0.020 | 0.991 | -        |
| ESRP1    | 8  | 54845  | 2 | 1 | 1 | 0.000 | 1.000 | NA       |
| F2RL3    | 19 | 9002   | 2 | 1 | 1 | 0.010 | 0.864 | damaging |
| F5       | 1  | 2153   | 2 | 6 | 1 | 0.010 | 0.998 | NA       |
| FARSA    | 19 | 2193   | 2 | 2 | 0 | 0.000 | 1.000 | -        |
| FMO1     | 1  | 2326   | 2 | 1 | 1 | 0.000 | 0.989 | neutral  |
| FNDC3B   | 3  | 64778  | 2 | 3 | 1 | 0.000 | 0.990 | NA       |
| GABRE    | X  | 2564   | 2 | 2 | 0 | 0.000 | 0.966 | -        |
| GALNT11  | 7  | 63917  | 2 | 4 | 0 | 0.000 | 0.999 | -        |
| GID8     | 20 | 54994  | 2 | 2 | 0 | 0.010 | 0.967 | -        |
| GPR146   | 7  | 115330 | 2 | 2 | 0 | 0.000 | 0.975 | -        |
| GPR39    | 2  | 2863   | 2 | 2 | 0 | 0.000 | 1.000 | -        |
| HCK      | 20 | 3055   | 2 | 2 | 0 | 0.000 | 0.999 | -        |
| HGS      | 17 | 9146   | 2 | 2 | 0 | 0.040 | 0.984 | -        |
| IFNA16   | 9  | 3449   | 2 | 2 | 0 | 0.000 | 1.000 | -        |
| IKZF2    | 2  | 22807  | 2 | 2 | 0 | 0.000 | 1.000 | -        |
| INTS5    | 11 | 80789  | 2 | 3 | 0 | 0.000 | 0.987 | -        |



|           |    |        |   |   |   |       |       |          |
|-----------|----|--------|---|---|---|-------|-------|----------|
| INTS9     | 8  | 55756  | 2 | 3 | 0 | 0.000 | 0.999 | -        |
| IQCG      | 3  | 84223  | 2 | 2 | 0 | 0.040 | 0.971 | -        |
| KANK4     | 1  | 163782 | 2 | 2 | 0 | 0.020 | 0.909 | -        |
| KATNB1    | 16 | 10300  | 2 | 2 | 0 | 0.000 | 0.997 | -        |
| KIAA0196  | 8  | 9897   | 2 | 4 | 0 | 0.020 | 0.998 | -        |
| KIAA1324  | 1  | 57535  | 2 | 1 | 1 | 0.010 | 0.894 | NA       |
| KLHDC4    | 16 | 54758  | 2 | 4 | 0 | 0.000 | 1.000 | -        |
| KMT2D     | 12 | 8085   | 2 | 4 | 0 | 0.000 | 0.996 | -        |
| LMO7      | 13 | 4008   | 2 | 1 | 1 | 0.000 | 0.997 | NA       |
| LPO       | 17 | 4025   | 2 | 2 | 0 | 0.000 | 1.000 | -        |
| LTBP1     | 2  | 4052   | 2 | 5 | 0 | 0.000 | 0.999 | -        |
| MAFK      | 7  | 7975   | 2 | 2 | 0 | 0.000 | 1.000 | -        |
| MCCC1     | 3  | 56922  | 2 | 3 | 0 | 0.020 | 0.973 | -        |
| MDGA2     | 14 | 161357 | 2 | 3 | 0 | 0.010 | 0.990 | -        |
| MICAL3    | 22 | 57553  | 2 | 4 | 0 | 0.010 | 0.870 | -        |
| MIP       | 12 | 4284   | 2 | 2 | 0 | 0.000 | 0.996 | -        |
| MMP28     | 17 | 79148  | 2 | 2 | 0 | 0.000 | 0.987 | -        |
| MRPL16    | 11 | 54948  | 2 | 3 | 0 | 0.000 | 0.922 | -        |
| MSTN      | 2  | 2660   | 2 | 3 | 0 | 0.000 | 0.999 | -        |
| MTMR12    | 5  | 54545  | 2 | 1 | 1 | 0.000 | 0.999 | NA       |
| MYH11     | 16 | 4629   | 2 | 2 | 2 | 0.000 | 0.917 | damaging |
| NAALADL2  | 3  | 254827 | 2 | 2 | 1 | 0.000 | 1.000 | NA       |
| NDST3     | 4  | 9348   | 2 | 2 | 0 | 0.000 | 0.995 | -        |
| NKX2-4    | 20 | 644524 | 2 | 2 | 0 | 0.010 | 0.989 | -        |
| NLGN1     | 3  | 22871  | 2 | 2 | 0 | 0.000 | 1.000 | -        |
| NT5M      | 17 | 56953  | 2 | 1 | 1 | 0.000 | 1.000 | damaging |
| PCDH12    | 5  | 51294  | 2 | 2 | 0 | 0.000 | 0.995 | -        |
| PCDHA12   | 5  | 56137  | 2 | 3 | 0 | 0.000 | 0.998 | -        |
| PCDHGB1   | 5  | 56104  | 2 | 3 | 0 | 0.000 | 0.998 | -        |
| PGLYRP4   | 1  | 57115  | 2 | 2 | 0 | 0.000 | 1.000 | -        |
| PHACTR4   | 1  | 65979  | 2 | 1 | 1 | 0.000 | 0.999 | damaging |
| PHF14     | 7  | 9678   | 2 | 2 | 1 | 0.000 | 0.997 | NA       |
| PKHD1     | 6  | 5314   | 2 | 4 | 1 | 0.030 | 0.952 | NA       |
| PLXNA4    | 7  | 91584  | 2 | 3 | 0 | 0.010 | 0.913 | -        |
| POLG      | 15 | 5428   | 2 | 3 | 0 | 0.010 | 0.998 | -        |
| PRPF38B   | 1  | 55119  | 2 | 3 | 0 | 0.010 | 0.994 | -        |
| PRRT1     | 6  | 80863  | 2 | 3 | 0 | 0.000 | 1.000 | -        |
| PSD4      | 2  | 23550  | 2 | 2 | 0 | 0.000 | 0.995 | -        |
| PXDN      | 2  | 7837   | 2 | 1 | 1 | 0.010 | 0.993 | NA       |
| RAB11FIP5 | 2  | 26056  | 2 | 1 | 1 | 0.000 | 0.965 | damaging |
| RAB3C     | 5  | 115827 | 2 | 2 | 0 | 0.000 | 0.958 | -        |
| RAG2      | 11 | 5897   | 2 | 2 | 0 | 0.000 | 0.995 | -        |
| RGS22     | 8  | 26166  | 2 | 2 | 0 | 0.000 | 0.999 | -        |
| RIN3      | 14 | 79890  | 2 | 2 | 0 | 0.010 | 0.995 | -        |
| ROBO2     | 3  | 6092   | 2 | 5 | 2 | 0.000 | 0.994 | damaging |
| SFXN2     | 10 | 118980 | 2 | 2 | 0 | 0.000 | 1.000 | -        |
| SH3GLB1   | 1  | 51100  | 2 | 3 | 0 | 0.040 | 0.895 | -        |
| SIRT7     | 17 | 51547  | 2 | 4 | 0 | 0.000 | 0.994 | -        |
| SLC12A3   | 16 | 6559   | 2 | 3 | 2 | 0.000 | 0.999 | NA       |
| SLC17A6   | 11 | 57084  | 2 | 2 | 0 | 0.000 | 0.999 | -        |
| SLC23A2   | 20 | 9962   | 2 | 2 | 0 | 0.000 | 0.999 | -        |
| SLC2A10   | 20 | 81031  | 2 | 2 | 0 | 0.000 | 1.000 | -        |
| SLC30A5   | 5  | 64924  | 2 | 1 | 1 | 0.010 | 0.931 | NA       |
| SLC6A3    | 5  | 6531   | 2 | 3 | 0 | 0.010 | 0.998 | -        |
| SMARCC2   | 12 | 6601   | 2 | 3 | 0 | 0.020 | 0.991 | -        |
| SNAP91    | 6  | 9892   | 2 | 2 | 0 | 0.000 | 0.992 | -        |
| SSBP2     | 5  | 23635  | 2 | 2 | 0 | 0.000 | 1.000 | -        |
| SYCP2     | 20 | 10388  | 2 | 1 | 1 | 0.000 | 0.950 | damaging |
| SYNDIG1   | 20 | 79953  | 2 | 2 | 0 | 0.010 | 0.999 | -        |
| SYNJ1     | 21 | 8867   | 2 | 1 | 1 | 0.000 | 1.000 | neutral  |
| TDRD1     | 10 | 56165  | 2 | 2 | 0 | 0.020 | 0.996 | -        |
| TF        | 3  | 7018   | 2 | 2 | 0 | 0.000 | 0.999 | -        |
| TLE4      | 9  | 7091   | 2 | 2 | 0 | 0.000 | 1.000 | -        |
| TMEM173   | 5  | 340061 | 2 | 2 | 0 | 0.000 | 0.994 | -        |
| TNKS      | 8  | 8658   | 2 | 4 | 0 | 0.000 | 0.986 | -        |
| TP73      | 1  | 7161   | 2 | 2 | 0 | 0.000 | 1.000 | -        |
| TRAK1     | 3  | 22906  | 2 | 3 | 0 | 0.000 | 1.000 | -        |
| TRIOBP    | 22 | 11078  | 2 | 6 | 0 | 0.000 | 0.981 | -        |
| TSHZ3     | 19 | 57616  | 2 | 4 | 0 | 0.010 | 0.990 | -        |
| TTC17     | 11 | 55761  | 2 | 3 | 2 | 0.000 | 0.998 | NA       |
| ULK2      | 17 | 9706   | 2 | 2 | 0 | 0.000 | 0.999 | -        |
| VPS13C    | 15 | 54832  | 2 | 4 | 0 | 0.010 | 0.988 | -        |

|                     |    |        |   |    |   |       |       |          |
|---------------------|----|--------|---|----|---|-------|-------|----------|
| WNK2                | 9  | 65268  | 2 | 3  | 0 | 0.020 | 0.964 | -        |
| XDH                 | 2  | 7498   | 2 | 4  | 0 | 0.000 | 1.000 | -        |
| ZEB2                | 2  | 9839   | 2 | 2  | 0 | 0.000 | 0.998 | -        |
| ZFHX2               | 14 | 85446  | 2 | 2  | 0 | 0.020 | 0.936 | -        |
| ZGRF1               | 4  | 55345  | 2 | 2  | 0 | 0.000 | 0.967 | -        |
| ZNF169              | 9  | 169841 | 2 | 3  | 0 | 0.000 | 0.993 | -        |
| AD000671.1          | 19 | 55851  | 2 | 0  | 2 | -     | -     | damaging |
| BRWD3               | X  | 254065 | 2 | 0  | 3 | -     | -     | damaging |
| CAMTA2              | 17 | 23125  | 2 | 0  | 2 | -     | -     | damaging |
| CCDC33              | 15 | 80125  | 2 | 1  | 1 | 0.010 | 0.001 | damaging |
| CLASP1              | 2  | 23332  | 2 | 3  | 2 | 0.000 | 0.135 | damaging |
| F8                  | X  | 2157   | 2 | 2  | 0 | 0.000 | 0.996 | -        |
| FXR1                | 3  | 8087   | 2 | 0  | 3 | -     | -     | damaging |
| GPR26               | 10 | 2849   | 2 | 2  | 0 | 0.000 | 0.912 | -        |
| GPR98               | 5  | 84059  | 2 | 0  | 2 | -     | -     | damaging |
| ABHD3               | 18 | 171586 | 2 | 2  | 0 | 0.040 | 0.865 | -        |
| ACSL6               | 5  | 23305  | 2 | 3  | 0 | 0.000 | 0.999 | -        |
| KAT7                | 17 | 11143  | 2 | 2  | 0 | 0.000 | 0.986 | -        |
| KIAA1755            | 20 | 85449  | 2 | 2  | 0 | 0.000 | 0.999 | -        |
| AFAP1L1             | 5  | 134265 | 2 | 2  | 0 | 0.000 | 0.976 | -        |
| LAMA4               | 6  | 3910   | 2 | 3  | 0 | 0.000 | 0.986 | -        |
| AKAP12              | 6  | 9590   | 2 | 3  | 1 | NA    | NA    | damaging |
| ALDH2               | 12 | 217    | 2 | 2  | 0 | 0.000 | 0.998 | -        |
| ALPK3               | 15 | 57538  | 2 | 1  | 1 | NA    | NA    | damaging |
| ANGPT4              | 20 | 51378  | 2 | 2  | 0 | 0.000 | 1.000 | -        |
| ANKRD44             | 2  | 91526  | 2 | 2  | 1 | 0.090 | 0.997 | damaging |
| ANLN                | 7  | 54443  | 2 | 1  | 1 | 1.000 | NA    | damaging |
| ANTXR2              | 4  | 118429 | 2 | 2  | 1 | 0.350 | 0.937 | damaging |
| APOB                | 2  | 338    | 2 | 4  | 0 | 0.000 | 0.996 | -        |
| ASAP1               | 8  | 50807  | 2 | 2  | 2 | NA    | NA    | damaging |
| ASCC3               | 6  | 10973  | 2 | 2  | 0 | 0.000 | 0.999 | -        |
| ASH1L               | 1  | 55870  | 2 | 1  | 1 | 0.090 | 0.982 | damaging |
| ATG2A               | 11 | 23130  | 2 | 1  | 1 | 0.100 | 0.854 | damaging |
| ATG9B               | 7  | 285973 | 2 | 4  | 0 | 0.010 | 0.860 | -        |
| ATM                 | 11 | 472    | 2 | 3  | 2 | 0.760 | 0.177 | damaging |
| NAV1                | 1  | 89796  | 2 | 2  | 0 | 0.000 | 0.997 | -        |
| ATXN3               | 14 | 4287   | 2 | 1  | 1 | NA    | NA    | damaging |
| AXL                 | 19 | 558    | 2 | 2  | 1 | 0.000 | 0.971 | NA       |
| BACE2               | 21 | 25825  | 2 | 1  | 1 | 0.940 | 0.007 | damaging |
| NOXO1               | 16 | 124056 | 2 | 2  | 0 | 0.020 | 0.943 | -        |
| BBS4                | 15 | 585    | 2 | 1  | 1 | NA    | NA    | damaging |
| BCORL1              | X  | 63035  | 2 | 2  | 0 | 0.000 | 0.990 | -        |
| BIVM,BIVM-<br>ERCC5 | 13 |        | 2 | 2  | 0 | 0.000 | 0.998 | -        |
| BPTF                | 17 | 2186   | 2 | 2  | 1 | NA    | NA    | damaging |
| BSN                 | 3  | 8927   | 2 | 2  | 0 | 0.000 | 0.974 | -        |
| C1orf168            | 1  | 199920 | 2 | 1  | 1 | NA    | NA    | damaging |
| C6orf10             | 6  | 10665  | 2 | 2  | 0 | 0.000 | 0.998 | -        |
| PDX1                | 13 | 3651   | 2 | 1  | 1 | 0.000 | 0.737 | damaging |
| PEAR1               | 1  | 375033 | 2 | 2  | 1 | 0.040 | 0.454 | damaging |
| CACNA1B             | 9  | 774    | 2 | 3  | 1 | NA    | NA    | damaging |
| CACNA1H             | 16 | 8912   | 2 | 3  | 0 | 0.010 | 0.917 | -        |
| CATSPER3            | 5  | 347732 | 2 | 3  | 0 | 0.010 | 0.996 | -        |
| POLD1               | 19 | 5424   | 2 | 4  | 0 | 0.000 | 0.998 | -        |
| CCSER1              | 4  | 401145 | 2 | 5  | 0 | 0.000 | 0.983 | -        |
| RALGPS1             | 9  | 9649   | 2 | 3  | 0 | 0.010 | 0.890 | -        |
| CD180               | 5  | 4064   | 2 | 3  | 0 | 0.030 | 1.000 | -        |
| CDK15               | 2  | 65061  | 2 | 2  | 1 | 0.000 | 0.999 | NA       |
| CELF4               | 18 | 56853  | 2 | 3  | 0 | 0.000 | 0.999 | -        |
| CELSR1              | 22 | 9620   | 2 | 4  | 1 | NA    | NA    | damaging |
| CEP152              | 15 | 22995  | 2 | 1  | 1 | NA    | NA    | damaging |
| CEP70               | 3  | 80321  | 2 | 2  | 2 | 0.000 | 0.999 | NA       |
| SIDT1               | 3  | 54847  | 2 | 5  | 0 | 0.010 | 0.986 | -        |
| SMCHD1              | 18 | 23347  | 2 | 4  | 0 | 0.000 | 0.956 | -        |
| COL15A1             | 9  | 1306   | 2 | 1  | 1 | NA    | NA    | damaging |
| COL5A1              | 9  | 1289   | 2 | 2  | 1 | 0.000 | 0.913 | NA       |
| COL6A5              | 3  | 256076 | 2 | 2  | 0 | 0.000 | 0.920 | -        |
| COL7A1              | 3  | 1294   | 2 | 3  | 2 | 0.330 | 0.245 | damaging |
| COL9A1              | 6  | 1297   | 2 | 4  | 1 | 0.000 | 1.000 | NA       |
| CP                  | 3  | 1356   | 2 | 2  | 1 | NA    | NA    | damaging |
| CPSF7               | 11 | 79869  | 2 | 3  | 0 | 0.040 | 0.997 | -        |
| CSMD1               | 8  | 64478  | 2 | 11 | 1 | 0.000 | 0.989 | NA       |

|          |    |        |   |   |   |       |       |          |
|----------|----|--------|---|---|---|-------|-------|----------|
| CTNND2   | 5  | 1501   | 2 | 5 | 0 | 0.010 | 0.990 | -        |
| CUBN     | 10 | 8029   | 2 | 5 | 4 | 0.000 | 0.995 | NA       |
| CYFIP2   | 5  | 26999  | 2 | 2 | 0 | 0.010 | 0.893 | -        |
| DAZAP1   | 19 | 26528  | 2 | 2 | 1 | NA    | NA    | damaging |
| DCP2     | 5  | 167227 | 2 | 3 | 1 | 0.010 | 0.996 | NA       |
| DLGAP2   | 8  | 9228   | 2 | 1 | 1 | NA    | NA    | damaging |
| DMPK     | 19 | 1760   | 2 | 2 | 1 | 0.000 | 1.000 | NA       |
| DMRT3    | 9  | 58524  | 2 | 1 | 1 | NA    | NA    | damaging |
| DMTF1    | 7  | 9988   | 2 | 2 | 1 | NA    | NA    | damaging |
| DNAJC25  | 9  | 548645 | 2 | 2 | 0 | 0.000 | 0.926 | -        |
| DOCK5    | 8  | 80005  | 2 | 2 | 0 | 0.020 | 0.972 | -        |
| ZBBX     | 3  | 79740  | 2 | 2 | 1 | 0.040 | NA    | damaging |
| EEFSEC   | 3  | 60678  | 2 | 2 | 0 | 0.000 | 1.000 | -        |
| ELF4     | X  | 2000   | 2 | 2 | 0 | 0.000 | 0.890 | -        |
| ELL2     | 5  | 22936  | 2 | 1 | 1 | NA    | NA    | damaging |
| EPHX2    | 8  | 2053   | 2 | 2 | 2 | 0.450 | 0.168 | damaging |
| FAM104A  | 17 | 84923  | 2 | 2 | 0 | 0.000 | 0.997 | -        |
| FBLN2    | 3  | 2199   | 2 | 3 | 2 | NA    | NA    | damaging |
| FBXL17   | 5  | 64839  | 2 | 1 | 1 | 0.310 | NA    | damaging |
| FBXW10   | 17 | 10517  | 2 | 1 | 1 | NA    | NA    | damaging |
| FER      | 5  | 2241   | 2 | 2 | 1 | NA    | NA    | damaging |
| FGD4     | 12 | 121512 | 2 | 2 | 0 | 0.000 | 0.883 | -        |
| FIP1L1   | 4  | 81608  | 2 | 1 | 2 | NA    | NA    | damaging |
| FOXO1    | 13 | 2308   | 2 | 3 | 0 | 0.040 | 0.986 | -        |
| FYB      | 5  | 2533   | 2 | 3 | 1 | NA    | NA    | damaging |
| FZD9     | 7  | 8326   | 2 | 2 | 0 | 0.000 | 0.985 | -        |
| G3BP2    | 4  | 9908   | 2 | 2 | 0 | 0.000 | 0.991 | -        |
| GLI2     | 2  | 2736   | 2 | 2 | 0 | 0.000 | 0.983 | -        |
| GPATCH1  | 19 | 55094  | 2 | 2 | 0 | 0.040 | 0.997 | -        |
| GPR161   | 1  | 23432  | 2 | 3 | 1 | 0.370 | 0.001 | damaging |
| GPR25    | 1  | 2848   | 2 | 2 | 1 | 0.000 | 0.990 | NA       |
| GRIK2    | 6  | 2898   | 2 | 2 | 0 | 0.000 | 1.000 | -        |
| GRM7     | 3  | 2917   | 2 | 1 | 1 | 0.090 | 0.995 | damaging |
| HAO1     | 20 | 54363  | 2 | 1 | 1 | NA    | NA    | damaging |
| HLA-B    | 6  | 3106   | 2 | 1 | 2 | NA    | NA    | damaging |
| HPS1     | 10 | 3257   | 2 | 2 | 1 | NA    | NA    | damaging |
| HSPA12A  | 10 | 259217 | 2 | 4 | 0 | 0.030 | 0.867 | -        |
| INHBB    | 2  | 3625   | 2 | 2 | 0 | 0.000 | 0.937 | -        |
| INTS2    | 17 | 57508  | 2 | 2 | 1 | NA    | NA    | damaging |
| IPO7     | 11 | 10527  | 2 | 2 | 1 | 0.230 | 1.000 | damaging |
| IRS2     | 13 | 8660   | 2 | 1 | 1 | NA    | NA    | damaging |
| ITGAX    | 16 | 3687   | 2 | 1 | 1 | 0.120 | 1.000 | damaging |
| ITGB4    | 17 | 3691   | 2 | 4 | 1 | 0.150 | 0.980 | damaging |
| ITGB8    | 7  | 3696   | 2 | 2 | 1 | NA    | NA    | damaging |
| JARID2   | 6  | 3720   | 2 | 3 | 1 | NA    | NA    | damaging |
| KAT8     | 16 | 84148  | 2 | 2 | 0 | 0.000 | 1.000 | -        |
| KCNQ2    | 20 | 3785   | 2 | 2 | 0 | 0.000 | 0.999 | -        |
| KCNU1    | 8  | 157855 | 2 | 4 | 0 | 0.000 | 0.999 | -        |
| KDM2B    | 12 | 84678  | 2 | 4 | 1 | NA    | NA    | damaging |
| KIAA1107 | 1  | 284697 | 2 | 2 | 0 | 0.000 | 0.964 | -        |
| KIF13B   | 8  | 23303  | 2 | 5 | 1 | NA    | NA    | damaging |
| KIF14    | 1  | 9928   | 2 | 2 | 2 | NA    | NA    | damaging |
| KIF26A   | 14 | 26153  | 2 | 2 | 1 | NA    | NA    | damaging |
| KLHDC7A  | 1  | 127707 | 2 | 2 | 0 | 0.020 | 0.997 | -        |
| KMT2B    | 19 | 9757   | 2 | 4 | 0 | 0.000 | 0.996 | -        |
| KRT24    | 17 | 192666 | 2 | 1 | 1 | NA    | NA    | damaging |
| KSR2     | 12 | 283455 | 2 | 5 | 1 | 0.030 | 0.999 | damaging |
| LAMA3    | 18 | 3909   | 2 | 5 | 1 | 0.010 | 1.000 | NA       |
| LAMA5    | 20 | 3911   | 2 | 2 | 1 | NA    | NA    | damaging |
| LARS     | 5  | 51520  | 2 | 2 | 1 | NA    | NA    | damaging |
| LENG8    | 19 | 114823 | 2 | 1 | 1 | NA    | NA    | damaging |
| LONP2    | 16 | 83752  | 2 | 1 | 1 | NA    | NA    | damaging |
| LOXL2    | 8  | 4017   | 2 | 4 | 0 | 0.000 | 1.000 | -        |
| LRP5     | 11 | 4041   | 2 | 4 | 1 | NA    | NA    | damaging |
| MAST1    | 19 | 22983  | 2 | 3 | 0 | 0.000 | 0.981 | -        |
| MDGA1    | 6  | 266727 | 2 | 5 | 1 | 0.000 | 0.876 | damaging |
| MEGF11   | 15 | 84465  | 2 | 3 | 0 | 0.000 | 1.000 | -        |
| MLH1     | 3  | 4292   | 2 | 3 | 0 | 0.000 | 0.984 | -        |
| MOSPD3   | 7  | 64598  | 2 | 3 | 0 | 0.010 | 0.995 | -        |
| MTA1     | 14 | 9112   | 2 | 2 | 1 | NA    | NA    | damaging |
| MUC5AC   | 11 | 4586   | 2 | 3 | 1 | 0.000 | 0.916 | NA       |
| MVB12B   | 9  | 89853  | 2 | 3 | 0 | 0.040 | 0.998 | -        |

|          |    |        |   |   |   |       |       |          |
|----------|----|--------|---|---|---|-------|-------|----------|
| MYH7     | 14 | 4625   | 2 | 4 | 0 | 0.010 | 1.000 | -        |
| MYO1F    | 19 | 4542   | 2 | 2 | 0 | 0.000 | 0.992 | -        |
| MYO5A    | 15 | 4644   | 2 | 1 | 1 | NA    | NA    | damaging |
| MYO9A    | 15 | 4649   | 2 | 4 | 1 | NA    | NA    | damaging |
| NCOA6    | 20 | 23054  | 2 | 2 | 0 | 0.030 | 0.939 | -        |
| NDUFB10  | 16 | 4716   | 2 | 2 | 0 | 0.000 | 0.933 | -        |
| NEFM     | 8  | 4741   | 2 | 2 | 0 | 0.000 | 0.973 | -        |
| NKTR     | 3  | 4820   | 2 | 1 | 1 | NA    | NA    | damaging |
| NLRP12   | 19 | 91662  | 2 | 1 | 1 | 0.190 | 0.004 | damaging |
| NOS2     | 17 | 4843   | 2 | 2 | 1 | NA    | NA    | damaging |
| OLFML2B  | 1  | 25903  | 2 | 1 | 1 | 0.430 | 0.039 | damaging |
| OR4C16   | 11 | 219428 | 2 | 2 | 0 | 0.000 | 0.997 | -        |
| OR52D1   | 11 | 390066 | 2 | 2 | 0 | 0.000 | 0.992 | -        |
| PACS2    | 14 | 23241  | 2 | 1 | 1 | NA    | NA    | damaging |
| PALD1    | 10 | 27143  | 2 | 3 | 0 | 0.000 | 0.998 | -        |
| PDIA5    | 3  | 10954  | 2 | 1 | 1 | NA    | NA    | damaging |
| PHTF1    | 1  | 10745  | 2 | 1 | 1 | NA    | NA    | damaging |
| PIK3R5   | 17 | 23533  | 2 | 3 | 0 | 0.000 | 0.993 | -        |
| PKN1     | 19 | 5585   | 2 | 2 | 0 | 0.010 | 0.986 | -        |
| PLA2G4D  | 15 | 283748 | 2 | 2 | 1 | 0.000 | 0.999 | NA       |
| PLAGL1   | 6  | 5325   | 2 | 1 | 1 | 0.360 | 0.024 | damaging |
| PLEKHH3  | 17 | 79990  | 2 | 1 | 1 | 0.210 | 0.117 | damaging |
| PPP2R1A  | 19 | 5518   | 2 | 1 | 1 | NA    | NA    | damaging |
| PRDM15   | 21 | 63977  | 2 | 6 | 0 | 0.030 | 0.998 | -        |
| PRPF18   | 10 | 8559   | 2 | 2 | 0 | 0.010 | 0.960 | -        |
| PRR18    | 6  | 285800 | 2 | 2 | 0 | 0.000 | 0.953 | -        |
| PRRX1    | 1  | 5396   | 2 | 2 | 0 | 0.030 | 0.996 | -        |
| PTPRK    | 6  | 5796   | 2 | 1 | 1 | NA    | NA    | damaging |
| RAB2B    | 14 | 84932  | 2 | 2 | 0 | 0.000 | 0.997 | -        |
| RAPH1    | 2  | 65059  | 2 | 1 | 1 | NA    | NA    | damaging |
| RBM25    | 14 | 58517  | 2 | 3 | 2 | 0.580 | 0.885 | damaging |
| RECK     | 9  | 8434   | 2 | 3 | 1 | 0.060 | 0.402 | damaging |
| RERE     | 1  | 473    | 2 | 4 | 0 | 0.000 | 0.999 | -        |
| RNASEH2A | 19 | 10535  | 2 | 2 | 0 | 0.000 | 1.000 | -        |
| RNF123   | 3  | 63891  | 2 | 3 | 1 | 0.660 | 0.004 | damaging |
| RNF17    | 13 | 56163  | 2 | 3 | 0 | 0.020 | 0.999 | -        |
| RNF43    | 17 | 54894  | 2 | 1 | 2 | NA    | NA    | damaging |
| ROM1     | 11 | 6094   | 2 | 1 | 1 | 0.130 | 0.044 | damaging |
| SBNO1    | 12 | 55206  | 2 | 2 | 1 | 0.390 | 0.989 | damaging |
| SCN5A    | 3  | 6331   | 2 | 3 | 0 | 0.000 | 0.997 | -        |
| SEMA6A   | 5  | 57556  | 2 | 2 | 0 | 0.000 | 1.000 | -        |
| SERPINI1 | 3  | 5274   | 2 | 2 | 0 | 0.010 | 1.000 | -        |
| SETD2    | 3  | 29072  | 2 | 1 | 1 | NA    | NA    | damaging |
| SFSWAP   | 12 | 6433   | 2 | 3 | 0 | 0.010 | 1.000 | -        |
| SH2D3C   | 9  | 10044  | 2 | 3 | 0 | 0.000 | 0.931 | -        |
| SHANK2   | 11 | 22941  | 2 | 5 | 0 | 0.010 | 0.999 | -        |
| SIN3A    | 15 | 25942  | 2 | 2 | 0 | 0.040 | 0.985 | -        |
| SIN3B    | 19 | 23309  | 2 | 4 | 1 | NA    | NA    | damaging |
| SIPA1L3  | 19 | 23094  | 2 | 3 | 1 | 0.050 | 0.783 | damaging |
| SLC15A4  | 12 | 121260 | 2 | 2 | 1 | NA    | NA    | damaging |
| SLC37A2  | 11 | 219855 | 2 | 3 | 0 | 0.040 | 0.852 | -        |
| SLC38A6  | 14 | 145389 | 2 | 2 | 0 | 0.010 | 0.889 | -        |
| SLC43A2  | 17 | 124935 | 2 | 1 | 1 | NA    | NA    | damaging |
| SLC7A2   | 8  | 6542   | 2 | 2 | 1 | 0.510 | 0.089 | damaging |
| SLITRK1  | 13 | 114798 | 2 | 2 | 0 | 0.000 | 1.000 | -        |
| SNRNP200 | 2  | 23020  | 2 | 2 | 0 | 0.000 | 0.984 | -        |
| SNX13    | 7  | 23161  | 2 | 3 | 1 | NA    | NA    | damaging |
| SNX19    | 11 | 399979 | 2 | 4 | 0 | 0.000 | 0.994 | -        |
| SPAG9    | 17 | 9043   | 2 | 3 | 0 | 0.030 | 0.946 | -        |
| SRCIN1   | 17 | 80725  | 2 | 4 | 1 | 0.230 | 0.652 | damaging |
| STAB2    | 12 | 55576  | 2 | 2 | 1 | 0.010 | 0.999 | NA       |
| STIP1    | 11 | 10963  | 2 | 1 | 1 | NA    | NA    | damaging |
| STX11    | 6  | 8676   | 2 | 2 | 0 | 0.010 | 0.867 | -        |
| SUV420H2 | 19 | 84787  | 2 | 2 | 1 | 0.000 | 0.999 | damaging |
| SYCP1    | 1  | 6847   | 2 | 5 | 1 | NA    | NA    | damaging |
| SYN3     | 22 | 8224   | 2 | 2 | 0 | 0.000 | 0.997 | -        |
| SYNE2    | 14 | 23224  | 2 | 3 | 2 | 0.080 | 0.971 | damaging |
| TBC1D16  | 17 | 125058 | 2 | 3 | 1 | 0.010 | 0.982 | NA       |
| TBC1D9   | 4  | 23158  | 2 | 3 | 0 | 0.010 | 0.975 | -        |
| TBCD     | 17 | 6904   | 2 | 1 | 2 | NA    | NA    | damaging |
| TBL3     | 16 | 10607  | 2 | 3 | 0 | 0.000 | 0.992 | -        |
| TENM1    | X  | 10178  | 2 | 2 | 0 | 0.000 | 0.993 | -        |

|                  |    |        |   |   |   |       |       |          |
|------------------|----|--------|---|---|---|-------|-------|----------|
| <i>TGM2</i>      | 20 | 7052   | 2 | 2 | 0 | 0.000 | 1.000 | -        |
| <i>TIAL1</i>     | 10 | 7073   | 2 | 3 | 0 | 0.000 | 0.999 | -        |
| <i>TIMP3</i>     | 22 | 7078   | 2 | 2 | 0 | 0.000 | 0.999 | -        |
| <i>TLK2</i>      | 17 | 11011  | 2 | 2 | 1 | NA    | NA    | damaging |
| <i>TMEM132E</i>  | 17 | 124842 | 2 | 2 | 1 | 0.020 | 0.006 | damaging |
| <i>TMPRSS11A</i> | 4  | 339967 | 2 | 2 | 1 | 0.400 | 0.057 | damaging |
| <i>TNIP1</i>     | 5  | 10318  | 2 | 2 | 2 | 0.590 | 0.002 | damaging |
| <i>TNR</i>       | 1  | 7143   | 2 | 2 | 0 | 0.000 | 1.000 | -        |
| <i>TRIO</i>      | 5  | 7204   | 2 | 4 | 1 | 0.020 | 0.989 | damaging |
| <i>TRPA1</i>     | 8  | 8989   | 2 | 3 | 1 | 0.030 | 0.977 | NA       |
| <i>TRPC6</i>     | 11 | 7225   | 2 | 2 | 0 | 0.000 | 0.976 | -        |
| <i>TLL2</i>      | 6  | 83887  | 2 | 1 | 1 | 0.230 | 0.048 | damaging |
| <i>USH1C</i>     | 11 | 10083  | 2 | 2 | 0 | 0.010 | 0.959 | -        |
| <i>USP34</i>     | 2  | 9736   | 2 | 1 | 1 | 0.700 | 0.004 | damaging |
| <i>WDR41</i>     | 5  | 55255  | 2 | 1 | 1 | NA    | NA    | damaging |
| <i>WRAP53</i>    | 17 | 55135  | 2 | 2 | 0 | 0.000 | 0.992 | -        |
| <i>WT1</i>       | 11 | 7490   | 2 | 3 | 1 | NA    | NA    | damaging |
| <i>XAB2</i>      | 19 | 56949  | 2 | 2 | 0 | 0.000 | 1.000 | -        |
| <i>ZC3H11A</i>   | 1  | 9877   | 2 | 2 | 1 | NA    | NA    | damaging |
| <i>ZHX2</i>      | 8  | 22882  | 2 | 1 | 1 | NA    | NA    | damaging |
| <i>ZNF142</i>    | 2  | 7701   | 2 | 1 | 2 | NA    | NA    | damaging |
| <i>ZNF778</i>    | 16 | 197320 | 2 | 1 | 1 | 0.400 | 0.402 | damaging |

(B) Genes showing genetic aberrations (SNVs or indels) in more than 15% of (2 or more) cancers belonging to Cluster B1 (n=12)

| <i>Gene symbol</i> | Chromosome | National Center for<br>Biotechnology Information<br>(NCBI) Gene ID | Number of patients<br>showing genetic<br>aberrations | Number of genetic<br>aberrations |        | Predicted protein function |          |          |
|--------------------|------------|--------------------------------------------------------------------|------------------------------------------------------|----------------------------------|--------|----------------------------|----------|----------|
|                    |            |                                                                    |                                                      |                                  |        | SNVs <sup>1</sup>          |          | Indels   |
|                    |            |                                                                    |                                                      | SNVs                             | Indels | SIFT                       | Polyphen | SIFT     |
| <i>TTN</i>         | 2          | 7273                                                               | 8                                                    | 21                               | 0      | 0.000                      | 1.000    | -        |
| <i>LRP1B</i>       | 2          | 53353                                                              | 7                                                    | 15                               | 0      | 0.000                      | 0.998    | -        |
| <i>TP53</i>        | 17         | 7157                                                               | 7                                                    | 5                                | 2      | 0.000                      | 1.000    | damaging |
| <i>ADAMTSL3</i>    | 15         | 57188                                                              | 5                                                    | 6                                | 0      | 0.040                      | 0.998    | -        |
| <i>PCDH15</i>      | 10         | 65217                                                              | 5                                                    | 4                                | 2      | 0.010                      | 1.000    | neutral  |
| <i>VAV2</i>        | 9          | 7410                                                               | 5                                                    | 5                                | 0      | 0.010                      | 0.992    | -        |
| <i>ADAMTS1</i>     | 21         | 9510                                                               | 4                                                    | 4                                | 0      | 0.000                      | 0.997    | -        |
| <i>APOB</i>        | 2          | 338                                                                | 4                                                    | 4                                | 0      | 0.000                      | 0.999    | -        |
| <i>ATG2A</i>       | 11         | 23130                                                              | 4                                                    | 3                                | 1      | NA                         | NA       | damaging |
| <i>ATP2B4</i>      | 1          | 493                                                                | 4                                                    | 4                                | 0      | 0.000                      | 0.990    | -        |
| <i>BIRC6</i>       | 2          | 57448                                                              | 4                                                    | 6                                | 0      | 0.000                      | 0.912    | -        |
| <i>CCDC80</i>      | 3          | 151887                                                             | 4                                                    | 2                                | 2      | 0.010                      | 0.955    | NA       |
| <i>CSMD3</i>       | 8          | 114788                                                             | 4                                                    | 7                                | 0      | 0.010                      | 0.888    | -        |
| <i>DNAH14</i>      | 1          | 127602                                                             | 4                                                    | 3                                | 1      | 0.040                      | 0.504    | damaging |
| <i>DPP10</i>       | 2          | 57628                                                              | 4                                                    | 5                                | 1      | 0.000                      | 0.995    | NA       |
| <i>DYNC2H1</i>     | 11         | 79659                                                              | 4                                                    | 5                                | 1      | 0.020                      | 0.910    | NA       |
| <i>DYSF</i>        | 2          | 8291                                                               | 4                                                    | 4                                | 1      | 0.050                      | 0.220    | damaging |
| <i>EDEM3</i>       | 1          | 80267                                                              | 4                                                    | 4                                | 0      | 0.000                      | 0.998    | -        |
| <i>FLNA</i>        | X          | 2316                                                               | 4                                                    | 4                                | 1      | 0.000                      | 0.988    | NA       |
| <i>FSTL5</i>       | 4          | 56884                                                              | 4                                                    | 4                                | 0      | 0.000                      | 0.856    | -        |
| <i>KMT2C</i>       | 7          | 58508                                                              | 4                                                    | 4                                | 0      | 0.010                      | 0.999    | -        |
| <i>MAP2</i>        | 2          | 4133                                                               | 4                                                    | 6                                | 0      | 0.000                      | 0.984    | -        |
| <i>MUC16</i>       | 19         | 94025                                                              | 4                                                    | 8                                | 1      | 0.000                      | 0.995    | NA       |
| <i>MYO7A</i>       | 11         | 4647                                                               | 4                                                    | 3                                | 2      | NA                         | NA       | damaging |
| <i>OBSCN</i>       | 1          | 84033                                                              | 4                                                    | 6                                | 3      | 0.040                      | 0.993    | damaging |
| <i>PDZRN3</i>      | 3          | 23024                                                              | 4                                                    | 4                                | 0      | 0.000                      | 0.966    | -        |
| <i>PTPRD</i>       | 9          | 5789                                                               | 4                                                    | 3                                | 2      | NA                         | 0.995    | damaging |
| <i>PTPRT</i>       | 20         | 11122                                                              | 4                                                    | 4                                | 1      | 0.000                      | 0.999    | damaging |
| <i>RYR1</i>        | 19         | 6261                                                               | 4                                                    | 3                                | 2      | 0.000                      | 0.955    | NA       |
| <i>RYR2</i>        | 1          | 6262                                                               | 4                                                    | 10                               | 1      | 0.000                      | 0.999    | NA       |
| <i>SASH1</i>       | 6          | 23328                                                              | 4                                                    | 4                                | 0      | 0.000                      | 0.990    | -        |
| <i>ZFHX4</i>       | 8          | 79776                                                              | 4                                                    | 6                                | 1      | 0.000                      | 0.999    | damaging |
| <i>ZNF804B</i>     | 7          | 219578                                                             | 4                                                    | 3                                | 1      | 0.010                      | 1.000    | damaging |
| <i>ABR</i>         | 17         | 29                                                                 | 3                                                    | 3                                | 1      | 0.000                      | 0.998    | damaging |
| <i>ADCY8</i>       | 8          | 114                                                                | 3                                                    | 4                                | 0      | 0.030                      | 0.953    | -        |
| <i>ADGRV1</i>      | 5          | 84059                                                              | 3                                                    | 3                                | 0      | 0.010                      | 0.983    | -        |
| <i>AFF2</i>        | X          | 2334                                                               | 3                                                    | 2                                | 2      | 0.040                      | 0.973    | NA       |
| <i>AGPAT4</i>      | 6          | 56895                                                              | 3                                                    | 2                                | 1      | 0.000                      | 0.989    | damaging |
| <i>ARAF</i>        | X          | 369                                                                | 3                                                    | 3                                | 1      | 0.000                      | 0.993    | damaging |
| <i>ARHGAP31</i>    | 3          | 57514                                                              | 3                                                    | 2                                | 2      | 0.020                      | 0.996    | NA       |
| <i>ARHGEF10L</i>   | 1          | 55160                                                              | 3                                                    | 2                                | 1      | 0.170                      | 0.508    | damaging |
| <i>ATP7B</i>       | 13         | 540                                                                | 3                                                    | 3                                | 1      | 0.550                      | 0.425    | damaging |

|          |    |        |   |   |   |       |       |          |
|----------|----|--------|---|---|---|-------|-------|----------|
| BRCA2    | 13 | 675    | 3 | 3 | 1 | 0.090 | 0.541 | damaging |
| CACNA1C  | 12 | 775    | 3 | 3 | 0 | 0.000 | 0.997 | -        |
| CCDC132  | 7  | 55610  | 3 | 1 | 3 | 0.010 | 0.994 | NA       |
| CEP120   | 5  | 153241 | 3 | 3 | 0 | 0.030 | 0.991 | -        |
| CEP170B  | 14 | 283638 | 3 | 3 | 0 | 0.010 | 0.968 | -        |
| CHAT     | 10 | 1103   | 3 | 3 | 0 | 0.010 | 0.997 | -        |
| CHST2    | 3  | 9435   | 3 | 4 | 1 | 0.000 | 0.991 | damaging |
| COL25A1  | 4  | 84570  | 3 | 3 | 1 | NA    | NA    | damaging |
| COL6A5   | 3  | 256076 | 3 | 3 | 0 | 0.000 | 0.981 | -        |
| CSMD2    | 1  | 114784 | 3 | 4 | 0 | 0.010 | 1.000 | -        |
| CUX1     | 7  | 1523   | 3 | 4 | 1 | 0.210 | 0.992 | damaging |
| DCC      | 18 | 1630   | 3 | 3 | 0 | 0.010 | 0.953 | -        |
| DNAH7    | 2  | 56171  | 3 | 1 | 2 | 0.000 | 1.000 | damaging |
| DNHD1    | 11 | 144132 | 3 | 4 | 0 | 0.030 | 0.998 | -        |
| DSCAML1  | 11 | 57453  | 3 | 4 | 1 | 0.010 | 0.998 | neutral  |
| ENGASE   | 17 | 64772  | 3 | 3 | 1 | 0.000 | 1.000 | NA       |
| FLNB     | 3  | 2317   | 3 | 4 | 0 | 0.000 | 0.990 | -        |
| GHR      | 5  | 2690   | 3 | 3 | 1 | NA    | NA    | damaging |
| GLI3     | 7  | 2737   | 3 | 2 | 1 | 0.000 | 0.853 | NA       |
| GPLD1    | 6  | 2822   | 3 | 4 | 1 | 0.570 | 0.012 | damaging |
| GRIK2    | 6  | 2898   | 3 | 3 | 1 | NA    | NA    | damaging |
| HEATR1   | 1  | 55127  | 3 | 2 | 1 | 0.000 | 0.999 | damaging |
| HLA-B    | 6  | 3106   | 3 | 3 | 1 | 0.560 | 0.007 | damaging |
| HUWE1    | X  | 10075  | 3 | 3 | 0 | 0.040 | 0.938 | -        |
| IGSF9B   | 11 | 22997  | 3 | 6 | 1 | 0.020 | 0.995 | damaging |
| ITGA6    | 2  | 3655   | 3 | 1 | 2 | NA    | NA    | damaging |
| ITPR3    | 6  | 3710   | 3 | 2 | 1 | NA    | NA    | damaging |
| KCNH2    | 7  | 3757   | 3 | 2 | 1 | 0.000 | 0.948 | neutral  |
| KCNQ2    | 20 | 3785   | 3 | 2 | 1 | 0.030 | 0.998 | NA       |
| KCNQ3    | 8  | 3786   | 3 | 2 | 1 | NA    | NA    | damaging |
| LYST     | 1  | 1130   | 3 | 5 | 0 | 0.010 | 0.947 | -        |
| MAP4K4   | 2  | 9448   | 3 | 3 | 0 | 0.000 | 0.994 | -        |
| MEGF8    | 19 | 1954   | 3 | 5 | 0 | 0.000 | 0.997 | -        |
| NID1     | 1  | 4811   | 3 | 3 | 0 | 0.000 | 1.000 | -        |
| NUP214   | 9  | 8021   | 3 | 2 | 2 | NA    | NA    | damaging |
| PCLO     | 7  | 27445  | 3 | 3 | 0 | 0.000 | 0.996 | -        |
| PIWIL1   | 12 | 9271   | 3 | 3 | 1 | NA    | NA    | damaging |
| PLEKHG1  | 6  | 57480  | 3 | 3 | 0 | 0.000 | 1.000 | -        |
| PXDN     | 2  | 7837   | 3 | 4 | 1 | 0.000 | 1.000 | NA       |
| RNF43    | 17 | 54894  | 3 | 1 | 3 | NA    | NA    | damaging |
| ROCK1    | 18 | 6093   | 3 | 1 | 4 | NA    | NA    | damaging |
| SATB2    | 2  | 23314  | 3 | 4 | 0 | 0.000 | 0.999 | -        |
| SHANK1   | 19 | 50944  | 3 | 3 | 0 | 0.000 | 0.996 | -        |
| SHANK2   | 11 | 22941  | 3 | 3 | 1 | 0.000 | 0.999 | damaging |
| SMO      | 7  | 6608   | 3 | 2 | 1 | 0.000 | 0.999 | neutral  |
| SNAP91   | 6  | 9892   | 3 | 5 | 0 | 0.000 | 1.000 | -        |
| SRRM2    | 16 | 23524  | 3 | 2 | 1 | 0.000 | 0.860 | damaging |
| SRRM4    | 12 | 84530  | 3 | 2 | 1 | NA    | 0.999 | damaging |
| TG       | 8  | 7038   | 3 | 4 | 0 | 0.000 | 0.999 | -        |
| TLN2     | 15 | 83660  | 3 | 4 | 0 | 0.010 | 0.957 | -        |
| TM6SF1   | 15 | 53346  | 3 | 2 | 1 | NA    | NA    | damaging |
| TPTE     | 21 | 7179   | 3 | 4 | 0 | 0.000 | 0.999 | -        |
| TRRAP    | 7  | 8295   | 3 | 3 | 0 | 0.020 | 0.982 | -        |
| UNC79    | 14 | 57578  | 3 | 4 | 0 | 0.000 | 0.985 | -        |
| XIRP2    | 2  | 129446 | 3 | 4 | 0 | 0.000 | 0.998 | -        |
| XRN1     | 3  | 54464  | 3 | 2 | 1 | NA    | NA    | damaging |
| ABCA10   | 17 | 10349  | 2 | 1 | 1 | 0.000 | 0.980 | NA       |
| ABCA7    | 19 | 10347  | 2 | 0 | 2 | -     | -     | damaging |
| ABLIM2   | 4  | 84448  | 2 | 1 | 2 | 0.040 | 0.998 | damaging |
| ACE      | 17 | 1636   | 2 | 1 | 1 | NA    | NA    | damaging |
| ACTB     | 7  | 60     | 2 | 2 | 0 | 0.000 | 1.000 | -        |
| ACTL6B   | 7  | 51412  | 2 | 1 | 1 | NA    | NA    | damaging |
| ADAM7    | 8  | 8756   | 2 | 0 | 2 | -     | -     | damaging |
| ADAMTS20 | 12 | 80070  | 2 | 2 | 0 | 0.030 | 1.000 | -        |
| ADAMTS9  | 3  | 56999  | 2 | 2 | 0 | 0.000 | 0.989 | -        |
| ADGRB2   | 1  | 576    | 2 | 3 | 0 | 0.010 | 1.000 | -        |
| ADRA2B   | 2  | 151    | 2 | 1 | 1 | 0.000 | 0.997 | damaging |
| AIFM2    | 10 | 84883  | 2 | 2 | 0 | 0.000 | 0.934 | -        |
| AKAP9    | 7  | 10142  | 2 | 1 | 1 | NA    | NA    | damaging |
| ALDH6A1  | 14 | 4329   | 2 | 2 | 0 | 0.000 | 1.000 | -        |
| ALG13    | X  | 79868  | 2 | 2 | 1 | NA    | NA    | damaging |
| ALPK3    | 15 | 57538  | 2 | 2 | 0 | 0.000 | 1.000 | -        |

|          |    |        |   |   |   |       |       |          |
|----------|----|--------|---|---|---|-------|-------|----------|
| AMMECR1  | X  | 9949   | 2 | 0 | 2 | -     | -     | damaging |
| ANKRD26  | 10 | 22852  | 2 | 0 | 2 | -     | -     | damaging |
| ANKRD50  | 4  | 57182  | 2 | 1 | 1 | 0.000 | 0.968 | damaging |
| ANXA6    | 5  | 309    | 2 | 2 | 0 | 0.000 | 0.999 | -        |
| APC2     | 19 | 10297  | 2 | 3 | 0 | 0.040 | 0.914 | -        |
| ARHGAP32 | 11 | 9743   | 2 | 2 | 1 | NA    | NA    | damaging |
| ARHGAP40 | 20 | 343578 | 2 | 1 | 1 | NA    | NA    | damaging |
| ARID1A   | 1  | 8289   | 2 | 1 | 3 | 0.460 | 0.990 | damaging |
| ARMC3    | 10 | 219681 | 2 | 1 | 1 | 0.440 | 0.913 | damaging |
| ARMC7    | 17 | 79637  | 2 | 1 | 1 | NA    | NA    | damaging |
| ASPM     | 1  | 259266 | 2 | 0 | 2 | -     | -     | damaging |
| ASTN1    | 1  | 460    | 2 | 2 | 0 | 0.040 | 0.961 | -        |
| ATAD5    | 17 | 79915  | 2 | 1 | 1 | NA    | NA    | damaging |
| ATP10A   | 15 | 57194  | 2 | 3 | 0 | 0.010 | 0.964 | -        |
| ATP9A    | 20 | 10079  | 2 | 3 | 0 | 0.000 | 0.998 | -        |
| ATRN     | 20 | 8455   | 2 | 0 | 2 | -     | -     | damaging |
| B3GAT1   | 11 | 27087  | 2 | 1 | 1 | 0.540 | 0.004 | damaging |
| BCHE     | 3  | 590    | 2 | 2 | 0 | 0.000 | 0.999 | -        |
| BNC2     | 9  | 54796  | 2 | 1 | 1 | 0.000 | 0.994 | damaging |
| BRINP3   | 1  | 339479 | 2 | 2 | 0 | 0.000 | 0.997 | -        |
| BTBD11   | 12 | 121551 | 2 | 2 | 0 | 0.000 | 0.968 | -        |
| BTNL3    | 5  | 10917  | 2 | 2 | 0 | 0.030 | 0.999 | -        |
| C10orf88 | 10 | 80007  | 2 | 1 | 1 | NA    | NA    | damaging |
| C14orf43 | 14 | 91748  | 2 | 0 | 2 | -     | -     | damaging |
| CACNA1D  | 3  | 776    | 2 | 2 | 0 | 0.000 | 1.000 | -        |
| CACNA1E  | 1  | 777    | 2 | 2 | 0 | 0.000 | 1.000 | -        |
| CACNA2D1 | 7  | 781    | 2 | 1 | 1 | 0.000 | 0.979 | NA       |
| CACNA2D4 | 12 | 93589  | 2 | 3 | 0 | 0.020 | 0.990 | -        |
| CACNG3   | 16 | 10368  | 2 | 3 | 0 | 0.010 | 0.999 | -        |
| CASS4    | 20 | 57091  | 2 | 2 | 1 | NA    | NA    | damaging |
| CBX2     | 17 | 84733  | 2 | 1 | 1 | NA    | 0.766 | damaging |
| CD1A     | 1  | 909    | 2 | 2 | 0 | 0.000 | 0.996 | -        |
| CDH1     | 16 | 999    | 2 | 0 | 2 | -     | -     | damaging |
| CDH10    | 5  | 1008   | 2 | 1 | 1 | 0.020 | 0.009 | damaging |
| CDH11    | 16 | 1009   | 2 | 3 | 0 | 0.000 | 1.000 | -        |
| CDH2     | 18 | 1000   | 2 | 3 | 0 | 0.000 | 0.959 | -        |
| CEP164   | 11 | 22897  | 2 | 2 | 1 | NA    | NA    | damaging |
| CEP192   | 18 | 55125  | 2 | 2 | 1 | 0.010 | 0.993 | NA       |
| CEP55    | 10 | 55165  | 2 | 1 | 1 | 0.860 | NA    | damaging |
| CFAP74   | 1  | 85452  | 2 | 2 | 0 | 0.030 | 0.966 | -        |
| CFP      | X  | 5199   | 2 | 1 | 1 | NA    | NA    | damaging |
| CHD7     | 8  | 55636  | 2 | 2 | 0 | 0.000 | 1.000 | -        |
| CHRNA4   | 20 | 1137   | 2 | 1 | 1 | NA    | NA    | damaging |
| CMTR1    | 6  | 23070  | 2 | 2 | 0 | 0.000 | 0.999 | -        |
| COL12A1  | 6  | 1303   | 2 | 1 | 1 | 0.100 | 0.959 | damaging |
| COL1A1   | 17 | 1277   | 2 | 2 | 0 | 0.020 | 0.997 | -        |
| CPD      | 17 | 1362   | 2 | 1 | 1 | NA    | NA    | damaging |
| GSTF3    | 11 | 1479   | 2 | 2 | 1 | 0.000 | 1.000 | NA       |
| CTNNB1   | 3  | 1499   | 2 | 1 | 1 | 0.000 | 1.000 | neutral  |
| CWC27    | 5  | 10283  | 2 | 0 | 3 | -     | -     | damaging |
| CX3CR1   | 3  | 1524   | 2 | 1 | 1 | NA    | NA    | damaging |
| CYP4A22  | 1  | 284541 | 2 | 3 | 0 | 0.030 | 0.973 | -        |
| DCLK2    | 4  | 166614 | 2 | 2 | 0 | 0.000 | 1.000 | -        |
| DLC1     | 8  | 10395  | 2 | 2 | 2 | 0.000 | 0.990 | NA       |
| DLX6     | 7  | 1750   | 2 | 2 | 0 | 0.000 | 0.989 | -        |
| DNAH11   | 7  | 8701   | 2 | 2 | 1 | 0.000 | 0.996 | NA       |
| DNAH8    | 6  | 1769   | 2 | 1 | 2 | NA    | NA    | damaging |
| DRD5     | 4  | 1816   | 2 | 2 | 0 | 0.000 | 0.950 | -        |
| DTWD1    | 15 | 56986  | 2 | 0 | 2 | -     | -     | damaging |
| DTX1     | 12 | 1840   | 2 | 2 | 0 | 0.000 | 0.996 | -        |
| EBF3     | 10 | 253738 | 2 | 2 | 0 | 0.000 | 0.883 | -        |
| EIF5B    | 2  | 9669   | 2 | 1 | 1 | NA    | NA    | damaging |
| EPPK1    | 8  | 83481  | 2 | 2 | 1 | NA    | NA    | damaging |
| ERBB4    | 2  | 2066   | 2 | 2 | 0 | 0.000 | 0.999 | -        |
| ERICH3   | 1  | 127254 | 2 | 2 | 0 | 0.000 | 0.999 | -        |
| ESR1     | 6  | 2099   | 2 | 2 | 0 | 0.010 | 0.983 | -        |
| ESRRA    | 11 | 2101   | 2 | 2 | 0 | 0.010 | 0.996 | -        |
| ETV5     | 3  | 2119   | 2 | 2 | 0 | 0.000 | 1.000 | -        |
| EXOSC10  | 1  | 5394   | 2 | 1 | 1 | NA    | NA    | damaging |
| F8       | X  | 2157   | 2 | 2 | 0 | 0.010 | 0.976 | -        |
| FAM120C  | X  | 54954  | 2 | 2 | 1 | 0.040 | 0.620 | damaging |
| FBN1     | 15 | 2200   | 2 | 1 | 1 | NA    | NA    | damaging |

|                  |    |        |   |   |   |       |       |          |
|------------------|----|--------|---|---|---|-------|-------|----------|
| <i>FBN3</i>      | 19 | 84467  | 2 | 2 | 0 | 0.000 | 0.974 | -        |
| <i>FGF13</i>     | X  | 2258   | 2 | 1 | 1 | NA    | NA    | damaging |
| <i>FKRP</i>      | 19 | 79147  | 2 | 2 | 0 | 0.010 | 0.997 | -        |
| <i>FLOT2</i>     | 17 | 2319   | 2 | 2 | 0 | 0.000 | 0.994 | -        |
| <i>FLT4</i>      | 5  | 2324   | 2 | 2 | 1 | NA    | NA    | damaging |
| <i>FMNL1</i>     | 17 | 752    | 2 | 3 | 0 | 0.000 | 0.999 | -        |
| <i>FNDC1</i>     | 6  | 84624  | 2 | 3 | 0 | 0.000 | 0.999 | -        |
| <i>FUBP3</i>     | 9  | 8939   | 2 | 1 | 2 | NA    | NA    | damaging |
| <i>GABBR1</i>    | 6  | 2550   | 2 | 1 | 1 | NA    | NA    | damaging |
| <i>GAS6</i>      | 13 | 2621   | 2 | 2 | 0 | 0.000 | 0.996 | -        |
| <i>GLTSCR1</i>   | 19 | 29998  | 2 | 2 | 1 | NA    | NA    | damaging |
| <i>GMCL1</i>     | 2  | 64395  | 2 | 0 | 2 | -     | -     | damaging |
| <i>GPI</i>       | 19 | 2821   | 2 | 2 | 0 | 0.000 | 1.000 | -        |
| <i>GPR161</i>    | 1  | 23432  | 2 | 0 | 2 | -     | -     | damaging |
| <i>GPR179</i>    | 17 | 440435 | 2 | 2 | 0 | 0.010 | 1.000 | -        |
| <i>GRIK3</i>     | 1  | 2899   | 2 | 2 | 0 | 0.000 | 0.998 | -        |
| <i>GRM1</i>      | 6  | 2911   | 2 | 3 | 0 | 0.000 | 1.000 | -        |
| <i>GTF2IRD1</i>  | 7  | 9569   | 2 | 1 | 1 | 0.050 | 0.999 | damaging |
| <i>GUCY2D</i>    | 17 | 3000   | 2 | 1 | 1 | NA    | NA    | damaging |
| <i>GZF1</i>      | 20 | 64412  | 2 | 1 | 1 | 0.070 | 0.991 | damaging |
| <i>H6PD</i>      | 1  | 9563   | 2 | 1 | 1 | NA    | NA    | damaging |
| <i>HECTD2</i>    | 10 | 143279 | 2 | 2 | 0 | 0.010 | 0.992 | -        |
| <i>HNRNPL</i>    | 19 | 3191   | 2 | 0 | 2 | -     | -     | damaging |
| <i>HSPG2</i>     | 1  | 3339   | 2 | 1 | 1 | 0.000 | 0.991 | NA       |
| <i>IARS</i>      | 9  | 3376   | 2 | 0 | 2 | -     | -     | damaging |
| <i>IKZF3</i>     | 17 | 22806  | 2 | 1 | 1 | 0.000 | 0.999 | NA       |
| <i>IMPAD1</i>    | 8  | 54928  | 2 | 1 | 1 | 0.000 | 0.980 | damaging |
| <i>INPP5D</i>    | 2  | 3635   | 2 | 2 | 0 | 0.000 | 0.996 | -        |
| <i>ITGA11</i>    | 15 | 22801  | 2 | 2 | 0 | 0.000 | 0.952 | -        |
| <i>KAT6A</i>     | 8  | 7994   | 2 | 3 | 0 | 0.010 | 0.985 | -        |
| <i>KCNC1</i>     | 11 | 3746   | 2 | 1 | 1 | NA    | NA    | damaging |
| <i>KCNU1</i>     | 8  | 157855 | 2 | 2 | 0 | 0.020 | 1.000 | -        |
| <i>KCTD16</i>    | 5  | 57528  | 2 | 1 | 1 | NA    | NA    | damaging |
| <i>KDM5A</i>     | 12 | 5927   | 2 | 2 | 0 | 0.030 | 0.998 | -        |
| <i>KIAA0556</i>  | 16 | 23247  | 2 | 2 | 0 | 0.000 | 0.999 | -        |
| <i>KIAA0930</i>  | 22 | 23313  | 2 | 0 | 2 | -     | -     | damaging |
| <i>KIAA1324L</i> | 7  | 222223 | 2 | 3 | 0 | 0.010 | 1.000 | -        |
| <i>KIF26A</i>    | 14 | 26153  | 2 | 2 | 0 | 0.000 | 0.865 | -        |
| <i>KIF27</i>     | 9  | 55582  | 2 | 2 | 0 | 0.010 | 0.862 | -        |
| <i>KLHL32</i>    | 6  | 114792 | 2 | 3 | 0 | 0.010 | 0.980 | -        |
| <i>KRT13</i>     | 17 | 3860   | 2 | 1 | 2 | NA    | NA    | damaging |
| <i>KSR2</i>      | 12 | 283455 | 2 | 2 | 0 | 0.000 | 0.997 | -        |
| <i>LAMB1</i>     | 7  | 3912   | 2 | 2 | 0 | 0.010 | 0.867 | -        |
| <i>LDB3</i>      | 10 | 11155  | 2 | 3 | 0 | 0.000 | 0.996 | -        |
| <i>LIG3</i>      | 17 | 3980   | 2 | 1 | 1 | 0.020 | NA    | damaging |
| <i>LRRC16B</i>   | 14 | 90668  | 2 | 1 | 1 | NA    | NA    | damaging |
| <i>LRRC4B</i>    | 19 | 94030  | 2 | 2 | 0 | 0.010 | 0.981 | -        |
| <i>MADD</i>      | 11 | 8567   | 2 | 3 | 0 | 0.000 | 1.000 | -        |
| <i>MAP2K4</i>    | 17 | 6416   | 2 | 2 | 1 | 0.090 | 0.015 | damaging |
| <i>MAP3K6</i>    | 1  | 9064   | 2 | 1 | 1 | 0.020 | 0.409 | damaging |
| <i>MEP1B</i>     | 18 | 4225   | 2 | 3 | 0 | 0.000 | 0.979 | -        |
| <i>MID1</i>      | X  | 4281   | 2 | 2 | 1 | NA    | NA    | damaging |
| <i>MMP9</i>      | 20 | 4318   | 2 | 2 | 0 | 0.000 | 0.997 | -        |
| <i>MRV11</i>     | 11 | 10335  | 2 | 3 | 0 | 0.000 | 0.998 | -        |
| <i>MTG2</i>      | 20 | 26164  | 2 | 2 | 0 | 0.000 | 0.999 | -        |
| <i>MXD3</i>      | 5  | 83463  | 2 | 2 | 0 | 0.000 | 0.974 | -        |
| <i>MYCBP2</i>    | 13 | 23077  | 2 | 1 | 1 | NA    | NA    | damaging |
| <i>MYLK</i>      | 3  | 4638   | 2 | 2 | 0 | 0.010 | 1.000 | -        |
| <i>MYO18A</i>    | 17 | 399687 | 2 | 0 | 2 | -     | -     | damaging |
| <i>NCKAP1</i>    | 2  | 10787  | 2 | 3 | 0 | 0.000 | 0.996 | -        |
| <i>NCOR2</i>     | 12 | 9612   | 2 | 0 | 2 | -     | -     | damaging |
| <i>NEFM</i>      | 8  | 4741   | 2 | 2 | 0 | 0.000 | 0.995 | -        |
| <i>NINL</i>      | 20 | 22981  | 2 | 2 | 1 | NA    | NA    | damaging |
| <i>NISCH</i>     | 3  | 11188  | 2 | 1 | 1 | NA    | NA    | damaging |
| <i>NOC3L</i>     | 10 | 64318  | 2 | 2 | 2 | 0.000 | 1.000 | NA       |
| <i>NPTX2</i>     | 7  | 4885   | 2 | 1 | 1 | NA    | NA    | damaging |
| <i>NRXN1</i>     | 2  | 9378   | 2 | 2 | 0 | 0.040 | 1.000 | -        |
| <i>OLFM1</i>     | 9  | 10439  | 2 | 3 | 0 | 0.000 | 0.927 | -        |
| <i>OR10R2</i>    | 1  | 343406 | 2 | 2 | 0 | 0.000 | 1.000 | -        |
| <i>OR8H1</i>     | 11 | 219469 | 2 | 2 | 0 | 0.000 | 0.999 | -        |
| <i>PBRM1</i>     | 3  | 55193  | 2 | 1 | 1 | 1.000 | NA    | damaging |
| <i>PCDH19</i>    | X  | 57526  | 2 | 2 | 1 | 0.090 | 0.999 | damaging |



|           |    |        |   |   |   |       |       |          |
|-----------|----|--------|---|---|---|-------|-------|----------|
| PCDHAC2   | 5  | 56134  | 2 | 2 | 0 | 0.030 | 0.979 | -        |
| PCDHB3    | 5  | 56132  | 2 | 2 | 0 | 0.000 | 0.881 | -        |
| PCDHB7    | 5  | 56129  | 2 | 2 | 0 | 0.000 | 0.966 | -        |
| PCK2      | 14 | 5106   | 2 | 2 | 0 | 0.000 | 1.000 | -        |
| PDE4C     | 19 | 5143   | 2 | 3 | 0 | 0.020 | 0.967 | -        |
| PFKFB3    | 10 | 5209   | 2 | 1 | 2 | NA    | NA    | damaging |
| PIP5K1A   | 1  | 8394   | 2 | 1 | 2 | 0.000 | 0.991 | NA       |
| PLA2G4D   | 15 | 283748 | 2 | 1 | 1 | 0.040 | 1.000 | NA       |
| PLCH1     | 3  | 23007  | 2 | 4 | 0 | 0.000 | 0.996 | -        |
| PLEC      | 8  | 5339   | 2 | 4 | 0 | 0.010 | 0.999 | -        |
| PPP5C     | 19 | 5536   | 2 | 2 | 0 | 0.000 | 0.937 | -        |
| PRKCD     | 3  | 5580   | 2 | 1 | 2 | 0.000 | 0.984 | damaging |
| PRPS2     | X  | 5634   | 2 | 3 | 0 | 0.000 | 0.991 | -        |
| PRRG1     | X  | 5638   | 2 | 1 | 2 | NA    | NA    | damaging |
| PRTG      | 15 | 283659 | 2 | 2 | 0 | 0.000 | 0.998 | -        |
| RABEP2    | 16 | 79874  | 2 | 2 | 0 | 0.000 | 0.997 | -        |
| RASGRP4   | 19 | 115727 | 2 | 3 | 0 | 0.040 | 0.998 | -        |
| RELN      | 7  | 5649   | 2 | 2 | 0 | 0.010 | 0.995 | -        |
| RGS6      | 14 | 9628   | 2 | 2 | 0 | 0.000 | 0.997 | -        |
| RNF144B   | 6  | 255488 | 2 | 1 | 1 | 0.000 | 1.000 | NA       |
| RTKN      | 2  | 6242   | 2 | 2 | 0 | 0.010 | 0.994 | -        |
| SACS      | 13 | 26278  | 2 | 2 | 1 | 0.000 | 0.996 | damaging |
| SBNO1     | 12 | 55206  | 2 | 1 | 1 | NA    | NA    | damaging |
| SCRIB     | 8  | 23513  | 2 | 2 | 0 | 0.000 | 0.997 | -        |
| SETBP1    | 18 | 26040  | 2 | 3 | 1 | 0.640 | 0.003 | damaging |
| SETDB1    | 1  | 9869   | 2 | 2 | 0 | 0.010 | 0.998 | -        |
| SETX      | 9  | 23064  | 2 | 2 | 1 | NA    | NA    | damaging |
| SFSWAP    | 12 | 6433   | 2 | 2 | 0 | 0.040 | 0.999 | -        |
| SGSM1     | 22 | 129049 | 2 | 2 | 0 | 0.000 | 1.000 | -        |
| SLC23A2   | 20 | 9962   | 2 | 1 | 1 | NA    | NA    | damaging |
| SLC26A7   | 8  | 115111 | 2 | 1 | 2 | NA    | NA    | damaging |
| SLC35A5   | 3  | 55032  | 2 | 2 | 0 | 0.010 | 1.000 | -        |
| SLC39A5   | 12 | 283375 | 2 | 2 | 0 | 0.000 | 0.994 | -        |
| SLC44A4   | 6  | 80736  | 2 | 1 | 1 | 0.450 | 0.008 | damaging |
| SLC4A4    | 4  | 8671   | 2 | 2 | 0 | 0.000 | 1.000 | -        |
| SLCO1B7   | 12 | 338821 | 2 | 2 | 0 | 0.000 | 0.998 | -        |
| SMAD4     | 18 | 4089   | 2 | 3 | 0 | 0.000 | 1.000 | -        |
| SMAP1     | 6  | 60682  | 2 | 0 | 2 | -     | -     | damaging |
| SMC4      | 3  | 10051  | 2 | 0 | 2 | -     | -     | damaging |
| SMCHD1    | 18 | 23347  | 2 | 0 | 2 | -     | -     | damaging |
| SNX17     | 2  | 9784   | 2 | 2 | 1 | 0.030 | 0.999 | NA       |
| SPATA5    | 4  | 166378 | 2 | 2 | 0 | 0.000 | 0.961 | -        |
| SPTBN5    | 15 | 51332  | 2 | 1 | 1 | NA    | NA    | damaging |
| STAT2     | 12 | 6773   | 2 | 1 | 1 | NA    | NA    | damaging |
| STK10     | 5  | 6793   | 2 | 1 | 1 | NA    | NA    | damaging |
| STRIP2    | 7  | 57464  | 2 | 2 | 0 | 0.000 | 0.998 | -        |
| SULF1     | 8  | 23213  | 2 | 1 | 1 | NA    | NA    | damaging |
| TAF1B     | 2  | 9014   | 2 | 2 | 1 | NA    | 0.748 | damaging |
| TAF2      | 8  | 6873   | 2 | 1 | 2 | NA    | NA    | damaging |
| TAF4B     | 18 | 6875   | 2 | 4 | 0 | 0.010 | 0.996 | -        |
| TAS2R7    | 12 | 50837  | 2 | 1 | 1 | 0.060 | 0.267 | damaging |
| TCEB3     | 1  | 6924   | 2 | 1 | 1 | 0.110 | 0.972 | damaging |
| TFAM      | 10 | 7019   | 2 | 0 | 2 | -     | -     | damaging |
| TGM3      | 20 | 7053   | 2 | 2 | 0 | 0.000 | 1.000 | -        |
| THNSL2    | 2  | 55258  | 2 | 1 | 1 | 0.000 | 0.989 | NA       |
| TMEM119   | 12 | 338773 | 2 | 1 | 1 | 0.240 | 0.571 | damaging |
| TMEM91    | 19 | 641649 | 2 | 2 | 0 | 0.000 | 0.913 | -        |
| TNIP1     | 5  | 10318  | 2 | 1 | 1 | 0.020 | 0.999 | neutral  |
| TNIP2     | 4  | 79155  | 2 | 2 | 0 | 0.000 | 0.980 | -        |
| TNS1      | 2  | 7145   | 2 | 1 | 1 | 0.000 | 0.912 | NA       |
| TPH1      | 11 | 7166   | 2 | 1 | 1 | 0.000 | NA    | damaging |
| TRAPPC9   | 8  | 83696  | 2 | 2 | 0 | 0.000 | 0.997 | -        |
| TRIM15    | 6  | 89870  | 2 | 1 | 1 | NA    | NA    | damaging |
| TRIM58    | 1  | 25893  | 2 | 2 | 0 | 0.020 | 0.925 | -        |
| TRPS1     | 8  | 7227   | 2 | 2 | 0 | 0.000 | 0.909 | -        |
| TSHR      | 14 | 7253   | 2 | 2 | 0 | 0.000 | 0.999 | -        |
| TTLL4     | 2  | 9654   | 2 | 2 | 0 | 0.000 | 0.972 | -        |
| TTLL5     | 14 | 23093  | 2 | 1 | 1 | 0.000 | 0.992 | NA       |
| TTYH2     | 17 | 94015  | 2 | 2 | 0 | 0.000 | 0.974 | -        |
| UHRF1BP1L | 12 | 23074  | 2 | 5 | 0 | 0.000 | 0.999 | -        |
| UNC13C    | 15 | 440279 | 2 | 3 | 0 | 0.000 | 0.997 | -        |
| USP13     | 3  | 8975   | 2 | 5 | 0 | 0.000 | 1.000 | -        |

|         |    |        |   |   |   |       |       |          |
|---------|----|--------|---|---|---|-------|-------|----------|
| VPS13C  | 15 | 54832  | 2 | 2 | 0 | 0.000 | 0.999 | -        |
| WBSCR17 | 7  | 64409  | 2 | 3 | 0 | 0.030 | 0.929 | -        |
| WDR20   | 14 | 91833  | 2 | 2 | 0 | 0.000 | 0.986 | -        |
| WDR75   | 2  | 84128  | 2 | 2 | 0 | 0.000 | 0.999 | -        |
| WFDC6   | 20 | 140870 | 2 | 1 | 1 | 0.510 | NA    | damaging |
| WNK1    | 12 | 65125  | 2 | 2 | 1 | NA    | NA    | damaging |
| WNT16   | 7  | 51384  | 2 | 1 | 2 | NA    | NA    | damaging |
| YTHDC2  | 5  | 64848  | 2 | 1 | 1 | 0.000 | 0.947 | NA       |
| YTHDF2  | 1  | 51441  | 2 | 1 | 1 | NA    | NA    | damaging |
| ZBED4   | 22 | 9889   | 2 | 0 | 2 | -     | -     | damaging |
| ZDBF2   | 2  | 57683  | 2 | 1 | 1 | 0.010 | 0.997 | damaging |
| ZMYM1   | 1  | 79830  | 2 | 1 | 1 | NA    | 0.033 | damaging |
| ZNF446  | 19 | 55663  | 2 | 3 | 0 | 0.000 | 0.962 | -        |
| ZNF667  | 19 | 63934  | 2 | 2 | 0 | 0.000 | 0.908 | -        |
| ZNFX1   | 20 | 57169  | 2 | 1 | 1 | NA    | NA    | damaging |

(C) Genes showing genetic aberrations (SNVs or indels) in more than 15% of (7 or more) cancers belonging to Cluster B2 (n=42)

| Gene symbol | Chromosome | National Center for<br>Biotechnology Information<br>(NCBI) Gene ID | Number of patients<br>showing genetic<br>aberrations | Number of genetic<br>aberrations |        | Predicted protein function |          |          |
|-------------|------------|--------------------------------------------------------------------|------------------------------------------------------|----------------------------------|--------|----------------------------|----------|----------|
|             |            |                                                                    |                                                      |                                  |        | SNVs <sup>1</sup>          |          | Indels   |
|             |            |                                                                    |                                                      | SNVs                             | Indels | SIFT                       | Polyphen | SIFT     |
| TTN         | 2          | 7273                                                               | 26                                                   | 60                               | 8      | 0.000                      | 0.999    | damaging |
| LRP1B       | 2          | 53353                                                              | 24                                                   | 40                               | 0      | 0.000                      | 0.997    | -        |
| TP53        | 17         | 7157                                                               | 23                                                   | 21                               | 2      | 0.000                      | 1.000    | damaging |
| CSMD1       | 8          | 64478                                                              | 18                                                   | 26                               | 2      | 0.010                      | 0.998    | damaging |
| COL11A1     | 1          | 1301                                                               | 17                                                   | 20                               | 0      | 0.000                      | 1.000    | -        |
| RYR2        | 1          | 6262                                                               | 17                                                   | 24                               | 1      | 0.000                      | 0.999    | NA       |
| MUC16       | 19         | 94025                                                              | 16                                                   | 18                               | 1      | 0.000                      | 0.987    | NA       |
| NRXN1       | 2          | 9378                                                               | 15                                                   | 20                               | 0      | 0.000                      | 1.000    | -        |
| SYNE1       | 6          | 23345                                                              | 15                                                   | 23                               | 0      | 0.010                      | 0.999    | -        |
| LAMA1       | 18         | 284217                                                             | 14                                                   | 17                               | 2      | 0.030                      | 0.997    | NA       |
| RIMS2       | 8          | 9699                                                               | 14                                                   | 16                               | 0      | 0.000                      | 0.998    | -        |
| DGKI        | 7          | 9162                                                               | 13                                                   | 15                               | 0      | 0.010                      | 0.868    | -        |
| FAT3        | 11         | 120114                                                             | 13                                                   | 16                               | 0      | 0.000                      | 1.000    | -        |
| RYR1        | 19         | 6261                                                               | 13                                                   | 19                               | 2      | 0.000                      | 0.996    | NA       |
| DNAH5       | 5          | 1767                                                               | 12                                                   | 20                               | 3      | 0.000                      | 0.998    | damaging |
| FMN2        | 1          | 56776                                                              | 12                                                   | 15                               | 0      | 0.000                      | 0.998    | -        |
| OBSCN       | 1          | 84033                                                              | 12                                                   | 14                               | 1      | 0.020                      | 1.000    | NA       |
| PAPPA2      | 1          | 60676                                                              | 12                                                   | 16                               | 0      | 0.000                      | 0.996    | -        |
| SI          | 3          | 6476                                                               | 12                                                   | 14                               | 1      | 0.000                      | 0.998    | NA       |
| CUBN        | 10         | 8029                                                               | 11                                                   | 15                               | 1      | 0.000                      | 1.000    | NA       |
| DMD         | X          | 1756                                                               | 11                                                   | 12                               | 3      | 0.130                      | 0.928    | damaging |
| DPP10       | 2          | 57628                                                              | 11                                                   | 12                               | 1      | NA                         | NA       | damaging |
| HMCN1       | 1          | 83872                                                              | 11                                                   | 17                               | 3      | 0.000                      | 1.000    | damaging |
| NRG1        | 8          | 3084                                                               | 11                                                   | 14                               | 2      | 0.000                      | 0.999    | NA       |
| PCDH15      | 10         | 65217                                                              | 11                                                   | 16                               | 0      | 0.000                      | 1.000    | -        |
| PKHD1       | 6          | 5314                                                               | 11                                                   | 17                               | 2      | 0.010                      | 0.985    | NA       |
| PXDN        | 2          | 7837                                                               | 11                                                   | 10                               | 1      | 0.000                      | 0.999    | NA       |
| SPTA1       | 1          | 6708                                                               | 11                                                   | 18                               | 1      | 0.050                      | 0.714    | damaging |
| SPTBN4      | 19         | 57731                                                              | 11                                                   | 12                               | 0      | 0.010                      | 0.994    | -        |
| ABCA13      | 7          | 154664                                                             | 10                                                   | 13                               | 1      | 0.000                      | 1.000    | neutral  |
| ABI3BP      | 3          | 25890                                                              | 10                                                   | 19                               | 0      | 0.030                      | 0.891    | -        |
| C5orf42     | 5          | 65250                                                              | 10                                                   | 8                                | 3      | 0.060                      | 0.012    | damaging |
| CACNA1E     | 1          | 777                                                                | 10                                                   | 11                               | 1      | 0.000                      | 0.991    | NA       |
| DYNC2H1     | 11         | 79659                                                              | 10                                                   | 8                                | 2      | NA                         | NA       | damaging |
| FREM2       | 13         | 341640                                                             | 10                                                   | 13                               | 0      | 0.000                      | 1.000    | -        |
| FSIP2       | 2          | 401024                                                             | 10                                                   | 9                                | 2      | 0.000                      | 0.043    | damaging |
| GLI3        | 7          | 2737                                                               | 10                                                   | 11                               | 0      | 0.000                      | 0.997    | -        |
| LRFN5       | 14         | 145581                                                             | 10                                                   | 10                               | 0      | 0.000                      | 1.000    | -        |
| MYO18B      | 22         | 84700                                                              | 10                                                   | 11                               | 2      | 0.000                      | 0.999    | damaging |
| NALCN       | 13         | 259232                                                             | 10                                                   | 10                               | 1      | 0.000                      | 0.999    | damaging |
| RELN        | 7          | 5649                                                               | 10                                                   | 9                                | 1      | 0.000                      | 0.984    | NA       |
| SYNE2       | 14         | 23224                                                              | 10                                                   | 7                                | 4      | 0.000                      | 0.991    | damaging |
| ADAMTS16    | 5          | 170690                                                             | 9                                                    | 14                               | 0      | 0.000                      | 1.000    | -        |
| AMPH        | 7          | 273                                                                | 9                                                    | 11                               | 2      | 0.000                      | 0.999    | NA       |
| ANK2        | 4          | 287                                                                | 9                                                    | 12                               | 1      | 0.000                      | 1.000    | damaging |
| CACNA1B     | 9          | 774                                                                | 9                                                    | 10                               | 1      | 0.000                      | 0.979    | NA       |
| COL18A1     | 21         | 80781                                                              | 9                                                    | 7                                | 3      | 0.000                      | 0.999    | damaging |
| DLG5        | 10         | 9231                                                               | 9                                                    | 11                               | 1      | 0.010                      | 0.993    | damaging |
| DNAH2       | 17         | 146754                                                             | 9                                                    | 12                               | 1      | 0.000                      | 0.999    | NA       |

|                 |    |        |   |    |   |       |       |          |
|-----------------|----|--------|---|----|---|-------|-------|----------|
| <i>DOCK10</i>   | 2  | 55619  | 9 | 11 | 0 | 0.000 | 0.999 | -        |
| <i>DOCK2</i>    | 5  | 1794   | 9 | 9  | 0 | 0.000 | 0.997 | -        |
| <i>DPYS</i>     | 8  | 1807   | 9 | 8  | 1 | 0.000 | 0.961 | NA       |
| <i>EYS</i>      | 6  | 346007 | 9 | 9  | 3 | 0.000 | 0.039 | damaging |
| <i>LAMA5</i>    | 20 | 3911   | 9 | 12 | 0 | 0.010 | 0.998 | -        |
| <i>NEB</i>      | 2  | 4703   | 9 | 13 | 1 | 0.000 | 0.999 | damaging |
| <i>PGR</i>      | 11 | 5241   | 9 | 9  | 0 | 0.000 | 0.991 | -        |
| <i>PLEC</i>     | 8  | 5339   | 9 | 13 | 1 | 0.010 | 0.999 | NA       |
| <i>PRKDC</i>    | 8  | 5591   | 9 | 9  | 1 | 0.000 | 0.997 | damaging |
| <i>PTPRT</i>    | 20 | 11122  | 9 | 7  | 5 | 0.000 | 0.997 | damaging |
| <i>SNTG1</i>    | 8  | 54212  | 9 | 12 | 1 | 0.000 | 1.000 | NA       |
| <i>SVEP1</i>    | 9  | 79987  | 9 | 8  | 1 | 0.030 | 0.999 | NA       |
| <i>AFF2</i>     | X  | 2334   | 8 | 11 | 0 | 0.000 | 0.999 | -        |
| <i>AP2A2</i>    | 11 | 161    | 8 | 6  | 2 | 0.000 | NA    | damaging |
| <i>ASPM</i>     | 1  | 259266 | 8 | 8  | 0 | 0.000 | 1.000 | -        |
| <i>ATP8A2</i>   | 13 | 51761  | 8 | 7  | 1 | 0.000 | 0.984 | NA       |
| <i>CDH2</i>     | 18 | 1000   | 8 | 9  | 0 | 0.000 | 0.866 | -        |
| <i>CDH8</i>     | 16 | 1006   | 8 | 8  | 0 | 0.000 | 0.987 | -        |
| <i>CNTN6</i>    | 3  | 27255  | 8 | 9  | 2 | 0.000 | 0.999 | damaging |
| <i>CSMD2</i>    | 1  | 114784 | 8 | 8  | 0 | 0.030 | 0.999 | -        |
| <i>DPYD</i>     | 1  | 1806   | 8 | 9  | 1 | 0.000 | 1.000 | NA       |
| <i>EML6</i>     | 2  | 400954 | 8 | 7  | 1 | 0.140 | 0.999 | damaging |
| <i>EP400</i>    | 12 | 57634  | 8 | 8  | 1 | 0.000 | 0.980 | NA       |
| <i>FAT2</i>     | 5  | 2196   | 8 | 12 | 0 | 0.000 | 1.000 | -        |
| <i>FAT4</i>     | 4  | 79633  | 8 | 8  | 1 | 0.000 | 0.999 | NA       |
| <i>FBN2</i>     | 5  | 2201   | 8 | 10 | 1 | 0.000 | 0.401 | damaging |
| <i>FLG</i>      | 1  | 2312   | 8 | 10 | 1 | 0.010 | 0.859 | damaging |
| <i>HECW1</i>    | 7  | 23072  | 8 | 10 | 1 | 0.000 | 0.996 | NA       |
| <i>LRP1</i>     | 12 | 4035   | 8 | 9  | 1 | 0.320 | 0.996 | damaging |
| <i>PCDH11X</i>  | X  | 27328  | 8 | 8  | 0 | 0.000 | 0.999 | -        |
| <i>PREX1</i>    | 20 | 57580  | 8 | 9  | 0 | 0.000 | 0.998 | -        |
| <i>RIMS1</i>    | 6  | 22999  | 8 | 8  | 1 | 0.000 | 1.000 | NA       |
| <i>SPEG</i>     | 2  | 10290  | 8 | 9  | 1 | 0.070 | 0.001 | damaging |
| <i>TLL1</i>     | 4  | 7092   | 8 | 8  | 0 | 0.030 | 0.999 | -        |
| <i>TRPA1</i>    | 8  | 8989   | 8 | 8  | 3 | 0.000 | 1.000 | NA       |
| <i>ZFX4</i>     | 8  | 79776  | 8 | 9  | 1 | 0.000 | 0.998 | damaging |
| <i>ADARB2</i>   | 10 | 105    | 7 | 7  | 0 | 0.010 | 0.967 | -        |
| <i>ADGRB1</i>   | 8  | 575    | 7 | 9  | 0 | 0.020 | 0.994 | -        |
| <i>ADGRV1</i>   | 5  | 84059  | 7 | 8  | 0 | 0.000 | 1.000 | -        |
| <i>ANKRD30A</i> | 10 | 91074  | 7 | 9  | 0 | 0.030 | 0.981 | -        |
| <i>CFAP46</i>   | 10 | 54777  | 7 | 7  | 0 | 0.000 | 0.998 | -        |
| <i>COL5A1</i>   | 9  | 1289   | 7 | 8  | 1 | 0.040 | 0.850 | damaging |
| <i>COL5A2</i>   | 2  | 1290   | 7 | 9  | 1 | 0.050 | 0.505 | damaging |
| <i>COL6A3</i>   | 2  | 1293   | 7 | 7  | 0 | 0.020 | 0.982 | -        |
| <i>DNAH12</i>   | 3  | 201625 | 7 | 7  | 0 | 0.000 | 0.996 | -        |
| <i>DNAH7</i>    | 2  | 56171  | 7 | 11 | 1 | 0.010 | 0.987 | NA       |
| <i>DNAH8</i>    | 6  | 1769   | 7 | 10 | 2 | 0.000 | 1.000 | damaging |
| <i>DNAH9</i>    | 17 | 1770   | 7 | 8  | 1 | 0.000 | 1.000 | NA       |
| <i>GRIN2A</i>   | 16 | 2903   | 7 | 6  | 1 | NA    | 0.999 | damaging |
| <i>GRM7</i>     | 3  | 2917   | 7 | 9  | 0 | 0.020 | 0.998 | -        |
| <i>HDAC9</i>    | 7  | 9734   | 7 | 8  | 0 | 0.000 | 0.998 | -        |
| <i>KALRN</i>    | 3  | 8997   | 7 | 11 | 2 | 0.000 | 0.999 | NA       |
| <i>KCND2</i>    | 7  | 3751   | 7 | 6  | 2 | NA    | 0.786 | damaging |
| <i>KIAA1109</i> | 4  | 84162  | 7 | 8  | 1 | 0.000 | 0.994 | NA       |
| <i>KIRREL</i>   | 1  | 55243  | 7 | 9  | 0 | 0.000 | 1.000 | -        |
| <i>LPA</i>      | 6  | 4018   | 7 | 8  | 0 | 0.000 | 0.999 | -        |
| <i>MACF1</i>    | 1  | 23499  | 7 | 10 | 0 | 0.030 | 0.991 | -        |
| <i>NLGN1</i>    | 3  | 22871  | 7 | 7  | 1 | 0.000 | 0.997 | NA       |
| <i>RYR3</i>     | 15 | 6263   | 7 | 10 | 1 | 0.000 | 1.000 | NA       |
| <i>TLR4</i>     | 9  | 7099   | 7 | 7  | 0 | 0.000 | 1.000 | -        |
| <i>TNC</i>      | 9  | 3371   | 7 | 6  | 1 | 0.050 | 0.870 | damaging |
| <i>TNS1</i>     | 2  | 7145   | 7 | 6  | 1 | 0.000 | 1.000 | NA       |
| <i>TRDN</i>     | 6  | 10345  | 7 | 6  | 2 | NA    | NA    | damaging |

NA: not applicable for the Sorting Intolerant from Tolerant (SIFT) (<https://sift.bii.a-star.edu.sg/>) or polymorphism phenotyping (PolyPhen)-2 (<http://genetics.bwh.harvard.edu/pph2/>); "-": SNVs or indels of the gene were not detected.

<sup>1</sup>Minimum SIFT score and maximum Polyphen-2 score among all detected mutations of each gene (A SIFT score of <0.05 means "damaging" and a Polyphen-2 score of >0.85 means "probably damaging") (Reds. 25 and 26).

**Supplementary Table 8A.** Copy number aberrations (CNAs) by Allele-Specific Copy Number Analysis of Tumors (ASCAT) based on single-nucleotide polymorphism microarray analysis of 66 cancerous tissue samples

| Patient ID | Chromosome | Start position <sup>1</sup> | End position <sup>1</sup> | Number of major allele <sup>2</sup> | Number of minor allele <sup>2</sup> | Copy number | Loss of heterozygosity <sup>3</sup> |
|------------|------------|-----------------------------|---------------------------|-------------------------------------|-------------------------------------|-------------|-------------------------------------|
| Case 1     | 1          | 82,154                      | 42,284,761                | 2                                   | 1                                   | 3           | 0                                   |
| Case 1     | 1          | 42,285,999                  | 42,390,317                | 2                                   | 2                                   | 4           | 0                                   |
| Case 1     | 1          | 42,397,435                  | 121,346,616               | 2                                   | 1                                   | 3           | 0                                   |
| Case 1     | 1          | 142,649,718                 | 249,218,992               | 2                                   | 1                                   | 3           | 0                                   |
| Case 1     | 2          | 18,674                      | 6,937,849                 | 2                                   | 1                                   | 3           | 0                                   |
| Case 1     | 2          | 6,941,288                   | 18,668,035                | 3                                   | 1                                   | 4           | 0                                   |
| Case 1     | 2          | 18,668,523                  | 24,856,759                | 3                                   | 2                                   | 5           | 0                                   |
| Case 1     | 2          | 24,878,211                  | 35,627,227                | 2                                   | 2                                   | 4           | 0                                   |
| Case 1     | 2          | 35,634,511                  | 36,078,157                | 3                                   | 1                                   | 4           | 0                                   |
| Case 1     | 2          | 36,078,497                  | 56,762,887                | 3                                   | 2                                   | 5           | 0                                   |
| Case 1     | 2          | 56,764,646                  | 56,983,615                | 2                                   | 0                                   | 2           | 1                                   |
| Case 1     | 2          | 56,984,303                  | 69,012,522                | 3                                   | 2                                   | 5           | 0                                   |
| Case 1     | 2          | 69,013,007                  | 75,290,700                | 2                                   | 2                                   | 4           | 0                                   |
| Case 1     | 2          | 75,291,510                  | 84,868,419                | 3                                   | 2                                   | 5           | 0                                   |
| Case 1     | 2          | 84,880,445                  | 88,625,879                | 2                                   | 2                                   | 4           | 0                                   |
| Case 1     | 2          | 88,634,973                  | 89,124,238                | 3                                   | 2                                   | 5           | 0                                   |
| Case 1     | 2          | 89,125,131                  | 92,081,640                | 2                                   | 2                                   | 4           | 0                                   |
| Case 1     | 2          | 95,429,424                  | 103,445,960               | 2                                   | 2                                   | 4           | 0                                   |
| Case 1     | 2          | 103,460,719                 | 118,318,731               | 3                                   | 2                                   | 5           | 0                                   |
| Case 1     | 2          | 118,335,509                 | 122,615,926               | 2                                   | 2                                   | 4           | 0                                   |
| Case 1     | 2          | 122,616,143                 | 124,994,170               | 3                                   | 2                                   | 5           | 0                                   |
| Case 1     | 2          | 124,996,309                 | 131,130,482               | 2                                   | 2                                   | 4           | 0                                   |
| Case 1     | 2          | 131,131,525                 | 243,048,760               | 2                                   | 1                                   | 3           | 0                                   |
| Case 1     | 3          | 61,495                      | 60,491,503                | 1                                   | 1                                   | 2           | 0                                   |
| Case 1     | 3          | 60,492,136                  | 60,780,913                | 1                                   | 0                                   | 1           | 0                                   |
| Case 1     | 3          | 60,788,842                  | 68,417,939                | 1                                   | 1                                   | 2           | 0                                   |
| Case 1     | 3          | 68,426,920                  | 68,725,295                | 6                                   | 1                                   | 7           | 0                                   |
| Case 1     | 3          | 68,728,679                  | 68,802,092                | 4                                   | 1                                   | 5           | 0                                   |
| Case 1     | 3          | 68,802,349                  | 69,125,881                | 6                                   | 1                                   | 7           | 0                                   |
| Case 1     | 3          | 69,126,495                  | 75,345,050                | 1                                   | 1                                   | 2           | 0                                   |
| Case 1     | 3          | 75,353,238                  | 75,453,294                | 4                                   | 2                                   | 6           | 0                                   |
| Case 1     | 3          | 75,462,982                  | 76,917,321                | 1                                   | 1                                   | 2           | 0                                   |
| Case 1     | 3          | 76,917,552                  | 76,972,804                | 1                                   | 0                                   | 1           | 0                                   |
| Case 1     | 3          | 76,976,439                  | 90,439,303                | 1                                   | 1                                   | 2           | 0                                   |
| Case 1     | 3          | 90,442,925                  | 90,442,925                | 2                                   | 1                                   | 3           | 0                                   |
| Case 1     | 3          | 93,537,290                  | 197,838,262               | 2                                   | 1                                   | 3           | 0                                   |
| Case 1     | 4          | 71,566                      | 127,452                   | 3                                   | 2                                   | 5           | 0                                   |
| Case 1     | 4          | 134,851                     | 2,083,359                 | 3                                   | 1                                   | 4           | 0                                   |
| Case 1     | 4          | 2,083,438                   | 7,475,424                 | 2                                   | 2                                   | 4           | 0                                   |
| Case 1     | 4          | 7,478,631                   | 49,620,898                | 2                                   | 1                                   | 3           | 0                                   |
| Case 1     | 4          | 52,697,856                  | 72,438,028                | 2                                   | 1                                   | 3           | 0                                   |
| Case 1     | 4          | 72,447,421                  | 72,631,182                | 2                                   | 2                                   | 4           | 0                                   |
| Case 1     | 4          | 72,631,218                  | 92,421,296                | 2                                   | 1                                   | 3           | 0                                   |
| Case 1     | 4          | 92,431,729                  | 190,963,766               | 3                                   | 1                                   | 4           | 0                                   |
| Case 1     | 5          | 38,139                      | 46,399,093                | 4                                   | 0                                   | 4           | 1                                   |
| Case 1     | 5          | 49,457,282                  | 49,457,282                | 4                                   | 0                                   | 4           | 1                                   |
| Case 1     | 5          | 49,470,083                  | 65,533,655                | 1                                   | 0                                   | 1           | 0                                   |
| Case 1     | 5          | 65,534,403                  | 65,655,217                | 2                                   | 0                                   | 2           | 1                                   |
| Case 1     | 5          | 65,655,412                  | 70,990,736                | 1                                   | 0                                   | 1           | 0                                   |
| Case 1     | 5          | 70,992,769                  | 180,693,127               | 2                                   | 0                                   | 2           | 1                                   |
| Case 1     | 6          | 108,666                     | 5,312,080                 | 1                                   | 1                                   | 2           | 0                                   |
| Case 1     | 6          | 5,320,622                   | 28,860,499                | 1                                   | 0                                   | 1           | 0                                   |
| Case 1     | 6          | 28,863,426                  | 28,905,791                | 1                                   | 1                                   | 2           | 0                                   |
| Case 1     | 6          | 28,909,465                  | 29,031,142                | 2                                   | 1                                   | 3           | 0                                   |
| Case 1     | 6          | 29,033,053                  | 39,987,315                | 1                                   | 1                                   | 2           | 0                                   |
| Case 1     | 6          | 39,999,149                  | 40,310,573                | 4                                   | 1                                   | 5           | 0                                   |
| Case 1     | 6          | 40,310,958                  | 40,802,261                | 8                                   | 0                                   | 8           | 1                                   |
| Case 1     | 6          | 40,802,980                  | 41,362,578                | 6                                   | 1                                   | 7           | 0                                   |

|        |    |             |             |   |   |   |   |
|--------|----|-------------|-------------|---|---|---|---|
| Case 1 | 6  | 41,364,110  | 42,478,124  | 5 | 1 | 6 | 0 |
| Case 1 | 6  | 42,478,281  | 42,975,462  | 7 | 0 | 7 | 1 |
| Case 1 | 6  | 42,976,232  | 44,297,772  | 5 | 0 | 5 | 1 |
| Case 1 | 6  | 44,297,871  | 44,620,507  | 6 | 0 | 6 | 1 |
| Case 1 | 6  | 44,621,993  | 44,651,735  | 5 | 1 | 6 | 0 |
| Case 1 | 6  | 44,655,191  | 45,468,074  | 7 | 1 | 8 | 0 |
| Case 1 | 6  | 45,480,010  | 47,247,108  | 4 | 1 | 5 | 0 |
| Case 1 | 6  | 47,251,758  | 51,010,906  | 3 | 1 | 4 | 0 |
| Case 1 | 6  | 51,014,810  | 58,752,089  | 2 | 1 | 3 | 0 |
| Case 1 | 6  | 61,891,118  | 170,980,171 | 2 | 1 | 3 | 0 |
| Case 1 | 7  | 44,935      | 98,795      | 2 | 0 | 2 | 1 |
| Case 1 | 7  | 98,977      | 2,645,522   | 2 | 1 | 3 | 0 |
| Case 1 | 7  | 2,645,552   | 11,022,095  | 3 | 1 | 4 | 0 |
| Case 1 | 7  | 11,022,230  | 11,605,462  | 3 | 2 | 5 | 0 |
| Case 1 | 7  | 11,607,706  | 19,938,943  | 3 | 1 | 4 | 0 |
| Case 1 | 7  | 19,939,084  | 19,970,430  | 4 | 2 | 6 | 0 |
| Case 1 | 7  | 19,972,439  | 37,689,170  | 3 | 1 | 4 | 0 |
| Case 1 | 7  | 37,689,851  | 40,277,288  | 2 | 2 | 4 | 0 |
| Case 1 | 7  | 40,284,166  | 43,821,453  | 3 | 1 | 4 | 0 |
| Case 1 | 7  | 43,827,414  | 45,148,019  | 2 | 2 | 4 | 0 |
| Case 1 | 7  | 45,148,545  | 51,152,961  | 3 | 1 | 4 | 0 |
| Case 1 | 7  | 51,156,296  | 55,221,167  | 3 | 2 | 5 | 0 |
| Case 1 | 7  | 55,221,725  | 58,019,061  | 2 | 2 | 4 | 0 |
| Case 1 | 7  | 61,056,053  | 63,791,269  | 2 | 2 | 4 | 0 |
| Case 1 | 7  | 63,796,171  | 63,910,447  | 2 | 1 | 3 | 0 |
| Case 1 | 7  | 63,939,340  | 76,307,066  | 2 | 2 | 4 | 0 |
| Case 1 | 7  | 76,309,742  | 79,149,775  | 3 | 2 | 5 | 0 |
| Case 1 | 7  | 79,159,240  | 98,799,772  | 4 | 0 | 4 | 1 |
| Case 1 | 7  | 98,799,972  | 99,659,902  | 7 | 0 | 7 | 1 |
| Case 1 | 7  | 99,659,903  | 99,740,717  | 5 | 0 | 5 | 1 |
| Case 1 | 7  | 99,745,399  | 128,200,152 | 3 | 0 | 3 | 1 |
| Case 1 | 7  | 128,307,573 | 128,517,183 | 4 | 0 | 4 | 1 |
| Case 1 | 7  | 128,518,631 | 129,441,536 | 3 | 0 | 3 | 1 |
| Case 1 | 7  | 129,444,951 | 135,211,446 | 4 | 0 | 4 | 1 |
| Case 1 | 7  | 135,213,352 | 138,669,367 | 5 | 0 | 5 | 1 |
| Case 1 | 7  | 138,673,567 | 140,301,971 | 6 | 0 | 6 | 1 |
| Case 1 | 7  | 140,301,990 | 141,101,902 | 8 | 0 | 8 | 1 |
| Case 1 | 7  | 141,106,552 | 159,119,486 | 2 | 0 | 2 | 1 |
| Case 1 | 8  | 164,984     | 9,775,516   | 1 | 1 | 2 | 0 |
| Case 1 | 8  | 9,781,492   | 10,755,560  | 5 | 1 | 6 | 0 |
| Case 1 | 8  | 10,755,724  | 13,925,268  | 3 | 1 | 4 | 0 |
| Case 1 | 8  | 13,937,395  | 19,039,163  | 2 | 1 | 3 | 0 |
| Case 1 | 8  | 19,039,642  | 19,177,772  | 1 | 1 | 2 | 0 |
| Case 1 | 8  | 19,189,125  | 43,791,691  | 2 | 1 | 3 | 0 |
| Case 1 | 8  | 46,886,735  | 99,109,800  | 2 | 1 | 3 | 0 |
| Case 1 | 8  | 99,110,123  | 142,713,568 | 2 | 2 | 4 | 0 |
| Case 1 | 8  | 142,715,006 | 146,293,414 | 2 | 1 | 3 | 0 |
| Case 1 | 9  | 46,587      | 46,944,322  | 2 | 0 | 2 | 1 |
| Case 1 | 9  | 65,629,772  | 141,066,491 | 3 | 0 | 3 | 1 |
| Case 1 | 10 | 98,087      | 39,097,912  | 2 | 1 | 3 | 0 |
| Case 1 | 10 | 42,436,301  | 77,081,848  | 2 | 1 | 3 | 0 |
| Case 1 | 10 | 77,105,739  | 77,231,608  | 1 | 0 | 1 | 0 |
| Case 1 | 10 | 77,249,629  | 135,477,883 | 2 | 1 | 3 | 0 |
| Case 1 | 11 | 193,146     | 50,697,498  | 2 | 0 | 2 | 1 |
| Case 1 | 11 | 51,095,992  | 51,591,253  | 2 | 1 | 3 | 0 |
| Case 1 | 11 | 54,794,237  | 68,506,246  | 2 | 1 | 3 | 0 |
| Case 1 | 11 | 68,509,835  | 68,660,364  | 3 | 1 | 4 | 0 |
| Case 1 | 11 | 68,660,393  | 104,497,607 | 2 | 1 | 3 | 0 |
| Case 1 | 11 | 104,504,416 | 105,168,942 | 2 | 0 | 2 | 1 |
| Case 1 | 11 | 105,200,258 | 113,317,973 | 2 | 1 | 3 | 0 |
| Case 1 | 11 | 113,320,419 | 113,591,832 | 5 | 1 | 6 | 0 |

|        |    |             |             |   |   |   |   |
|--------|----|-------------|-------------|---|---|---|---|
| Case 1 | 11 | 113,599,224 | 114,115,641 | 6 | 1 | 7 | 0 |
| Case 1 | 11 | 114,117,921 | 134,934,063 | 2 | 0 | 2 | 1 |
| Case 1 | 12 | 191,619     | 3,409,211   | 2 | 1 | 3 | 0 |
| Case 1 | 12 | 3,411,438   | 4,734,970   | 2 | 0 | 2 | 1 |
| Case 1 | 12 | 4,735,742   | 12,137,129  | 2 | 1 | 3 | 0 |
| Case 1 | 12 | 12,139,231  | 14,804,936  | 2 | 0 | 2 | 1 |
| Case 1 | 12 | 14,809,278  | 34,853,011  | 2 | 1 | 3 | 0 |
| Case 1 | 12 | 37,876,400  | 43,777,753  | 2 | 1 | 3 | 0 |
| Case 1 | 12 | 43,782,585  | 133,810,935 | 2 | 0 | 2 | 1 |
| Case 1 | 13 | 19,058,717  | 115,103,529 | 3 | 0 | 3 | 1 |
| Case 1 | 14 | 19,280,733  | 20,432,664  | 4 | 0 | 4 | 1 |
| Case 1 | 14 | 20,443,751  | 22,215,075  | 3 | 0 | 3 | 1 |
| Case 1 | 14 | 22,220,569  | 22,970,327  | 4 | 0 | 4 | 1 |
| Case 1 | 14 | 22,972,815  | 54,560,096  | 3 | 0 | 3 | 1 |
| Case 1 | 14 | 54,574,131  | 75,754,010  | 2 | 0 | 2 | 1 |
| Case 1 | 14 | 75,755,192  | 75,959,341  | 4 | 0 | 4 | 1 |
| Case 1 | 14 | 75,960,536  | 107,287,663 | 2 | 0 | 2 | 1 |
| Case 1 | 15 | 20,034,919  | 102,461,162 | 2 | 1 | 3 | 0 |
| Case 1 | 16 | 88,165      | 5,576,244   | 2 | 1 | 3 | 0 |
| Case 1 | 16 | 5,576,273   | 22,713,612  | 2 | 2 | 4 | 0 |
| Case 1 | 16 | 22,714,078  | 35,285,582  | 2 | 1 | 3 | 0 |
| Case 1 | 16 | 46,450,037  | 87,349,333  | 3 | 1 | 4 | 0 |
| Case 1 | 16 | 87,350,773  | 90,274,695  | 2 | 1 | 3 | 0 |
| Case 1 | 17 | 11,885      | 4,109,722   | 2 | 0 | 2 | 1 |
| Case 1 | 17 | 4,111,325   | 4,240,629   | 1 | 0 | 1 | 0 |
| Case 1 | 17 | 4,242,178   | 16,282,454  | 2 | 0 | 2 | 1 |
| Case 1 | 17 | 16,286,908  | 22,242,355  | 2 | 1 | 3 | 0 |
| Case 1 | 17 | 25,268,142  | 25,713,138  | 2 | 1 | 3 | 0 |
| Case 1 | 17 | 25,725,605  | 25,875,342  | 3 | 1 | 4 | 0 |
| Case 1 | 17 | 25,879,352  | 34,443,811  | 2 | 1 | 3 | 0 |
| Case 1 | 17 | 34,445,325  | 34,476,396  | 3 | 2 | 5 | 0 |
| Case 1 | 17 | 34,597,521  | 81,060,040  | 2 | 1 | 3 | 0 |
| Case 1 | 18 | 87,505      | 9,619,805   | 1 | 1 | 2 | 0 |
| Case 1 | 18 | 9,623,036   | 9,886,615   | 2 | 1 | 3 | 0 |
| Case 1 | 18 | 9,886,619   | 15,375,878  | 1 | 1 | 2 | 0 |
| Case 1 | 18 | 18,520,354  | 20,683,093  | 1 | 1 | 2 | 0 |
| Case 1 | 18 | 20,691,263  | 20,824,373  | 2 | 1 | 3 | 0 |
| Case 1 | 18 | 20,828,972  | 78,015,180  | 1 | 1 | 2 | 0 |
| Case 1 | 19 | 260,912     | 24,629,285  | 1 | 1 | 2 | 0 |
| Case 1 | 19 | 27,732,159  | 45,652,079  | 1 | 1 | 2 | 0 |
| Case 1 | 19 | 45,655,303  | 59,097,160  | 2 | 1 | 3 | 0 |
| Case 1 | 20 | 63,244      | 5,340,447   | 2 | 2 | 4 | 0 |
| Case 1 | 20 | 5,343,385   | 9,181,662   | 3 | 2 | 5 | 0 |
| Case 1 | 20 | 9,184,660   | 25,610,457  | 2 | 2 | 4 | 0 |
| Case 1 | 20 | 25,628,668  | 26,293,985  | 3 | 2 | 5 | 0 |
| Case 1 | 20 | 29,425,357  | 46,208,605  | 3 | 2 | 5 | 0 |
| Case 1 | 20 | 46,228,667  | 50,477,307  | 3 | 1 | 4 | 0 |
| Case 1 | 20 | 50,480,790  | 54,238,237  | 4 | 2 | 6 | 0 |
| Case 1 | 20 | 54,239,617  | 59,093,065  | 3 | 2 | 5 | 0 |
| Case 1 | 20 | 59,094,459  | 59,157,463  | 4 | 2 | 6 | 0 |
| Case 1 | 20 | 59,163,094  | 60,131,514  | 3 | 2 | 5 | 0 |
| Case 1 | 20 | 60,136,084  | 62,948,788  | 2 | 2 | 4 | 0 |
| Case 1 | 21 | 10,827,533  | 10,971,337  | 2 | 0 | 2 | 1 |
| Case 1 | 21 | 14,368,320  | 48,100,155  | 2 | 0 | 2 | 1 |
| Case 1 | 22 | 16,114,244  | 51,195,728  | 2 | 1 | 3 | 0 |
| Case 1 | X  | 2,700,157   | 58,488,110  | 2 | 0 | 2 | 1 |
| Case 1 | X  | 61,694,576  | 154,898,561 | 2 | 0 | 2 | 1 |
| Case 2 | 1  | 82,154      | 3,842,112   | 4 | 1 | 5 | 0 |
| Case 2 | 1  | 3,996,946   | 7,338,813   | 5 | 1 | 6 | 0 |
| Case 2 | 1  | 7,342,106   | 7,567,346   | 5 | 2 | 7 | 0 |
| Case 2 | 1  | 7,567,618   | 17,273,371  | 5 | 1 | 6 | 0 |

|        |   |             |             |   |   |    |   |
|--------|---|-------------|-------------|---|---|----|---|
| Case 2 | 1 | 17,281,235  | 79,350,364  | 3 | 2 | 5  | 0 |
| Case 2 | 1 | 79,353,399  | 94,441,950  | 3 | 1 | 4  | 0 |
| Case 2 | 1 | 94,442,739  | 96,309,286  | 3 | 2 | 5  | 0 |
| Case 2 | 1 | 96,316,702  | 107,817,550 | 3 | 1 | 4  | 0 |
| Case 2 | 1 | 107,818,604 | 121,346,616 | 3 | 2 | 5  | 0 |
| Case 2 | 1 | 142,649,718 | 145,095,477 | 4 | 2 | 6  | 0 |
| Case 2 | 1 | 145,101,177 | 173,268,672 | 5 | 1 | 6  | 0 |
| Case 2 | 1 | 173,270,649 | 173,381,535 | 6 | 2 | 8  | 0 |
| Case 2 | 1 | 173,381,640 | 177,383,443 | 5 | 1 | 6  | 0 |
| Case 2 | 1 | 177,384,036 | 190,533,700 | 6 | 1 | 7  | 0 |
| Case 2 | 1 | 190,543,311 | 200,692,665 | 7 | 1 | 8  | 0 |
| Case 2 | 1 | 200,703,541 | 208,644,820 | 6 | 1 | 7  | 0 |
| Case 2 | 1 | 208,646,090 | 228,109,637 | 7 | 1 | 8  | 0 |
| Case 2 | 1 | 228,110,064 | 238,432,884 | 6 | 1 | 7  | 0 |
| Case 2 | 1 | 238,432,940 | 247,241,668 | 7 | 1 | 8  | 0 |
| Case 2 | 1 | 247,250,589 | 247,262,367 | 9 | 2 | 11 | 0 |
| Case 2 | 1 | 247,262,625 | 249,218,992 | 6 | 1 | 7  | 0 |
| Case 2 | 2 | 18,674      | 5,635,976   | 3 | 2 | 5  | 0 |
| Case 2 | 2 | 5,636,444   | 5,708,764   | 2 | 2 | 4  | 0 |
| Case 2 | 2 | 5,711,395   | 92,081,640  | 3 | 2 | 5  | 0 |
| Case 2 | 2 | 95,429,424  | 187,167,278 | 3 | 2 | 5  | 0 |
| Case 2 | 2 | 187,210,847 | 187,754,997 | 5 | 2 | 7  | 0 |
| Case 2 | 2 | 187,775,780 | 243,048,760 | 3 | 2 | 5  | 0 |
| Case 2 | 3 | 61,495      | 46,755,841  | 4 | 1 | 5  | 0 |
| Case 2 | 3 | 46,755,875  | 47,518,266  | 5 | 0 | 5  | 1 |
| Case 2 | 3 | 47,528,193  | 52,809,996  | 4 | 1 | 5  | 0 |
| Case 2 | 3 | 52,810,333  | 59,920,004  | 4 | 2 | 6  | 0 |
| Case 2 | 3 | 59,920,697  | 60,189,471  | 3 | 2 | 5  | 0 |
| Case 2 | 3 | 60,192,208  | 60,280,743  | 4 | 1 | 5  | 0 |
| Case 2 | 3 | 60,283,702  | 60,364,830  | 4 | 2 | 6  | 0 |
| Case 2 | 3 | 60,370,362  | 60,571,772  | 3 | 0 | 3  | 1 |
| Case 2 | 3 | 60,572,073  | 61,168,215  | 4 | 2 | 6  | 0 |
| Case 2 | 3 | 61,176,788  | 61,253,045  | 3 | 1 | 4  | 0 |
| Case 2 | 3 | 61,253,495  | 61,706,745  | 4 | 2 | 6  | 0 |
| Case 2 | 3 | 61,708,608  | 61,853,342  | 4 | 1 | 5  | 0 |
| Case 2 | 3 | 61,853,529  | 68,452,616  | 4 | 2 | 6  | 0 |
| Case 2 | 3 | 68,453,623  | 68,478,646  | 5 | 2 | 7  | 0 |
| Case 2 | 3 | 68,480,290  | 90,417,760  | 4 | 2 | 6  | 0 |
| Case 2 | 3 | 90,428,286  | 90,442,925  | 5 | 2 | 7  | 0 |
| Case 2 | 3 | 93,537,290  | 97,719,222  | 5 | 2 | 7  | 0 |
| Case 2 | 3 | 97,721,299  | 101,220,400 | 5 | 1 | 6  | 0 |
| Case 2 | 3 | 101,231,731 | 121,251,934 | 5 | 0 | 5  | 1 |
| Case 2 | 3 | 121,252,048 | 155,505,597 | 5 | 1 | 6  | 0 |
| Case 2 | 3 | 155,518,043 | 174,243,684 | 5 | 2 | 7  | 0 |
| Case 2 | 3 | 174,245,721 | 174,504,462 | 7 | 2 | 9  | 0 |
| Case 2 | 3 | 174,506,772 | 174,563,022 | 6 | 4 | 10 | 0 |
| Case 2 | 3 | 174,563,280 | 176,138,839 | 6 | 2 | 8  | 0 |
| Case 2 | 3 | 176,149,354 | 184,322,950 | 3 | 2 | 5  | 0 |
| Case 2 | 3 | 184,326,485 | 184,549,539 | 3 | 1 | 4  | 0 |
| Case 2 | 3 | 184,550,501 | 190,345,165 | 4 | 0 | 4  | 1 |
| Case 2 | 3 | 190,347,523 | 192,423,862 | 3 | 0 | 3  | 1 |
| Case 2 | 3 | 192,424,298 | 195,308,171 | 4 | 0 | 4  | 1 |
| Case 2 | 3 | 195,310,679 | 195,823,775 | 3 | 1 | 4  | 0 |
| Case 2 | 3 | 195,827,205 | 196,743,993 | 3 | 2 | 5  | 0 |
| Case 2 | 3 | 196,743,994 | 197,838,262 | 3 | 1 | 4  | 0 |
| Case 2 | 4 | 71,566      | 2,294,746   | 3 | 0 | 3  | 1 |
| Case 2 | 4 | 2,297,550   | 6,544,606   | 4 | 0 | 4  | 1 |
| Case 2 | 4 | 6,546,433   | 10,424,323  | 5 | 0 | 5  | 1 |
| Case 2 | 4 | 10,432,402  | 18,670,019  | 4 | 0 | 4  | 1 |
| Case 2 | 4 | 18,682,975  | 20,841,386  | 3 | 0 | 3  | 1 |
| Case 2 | 4 | 20,843,206  | 27,409,678  | 4 | 0 | 4  | 1 |

|        |   |             |             |    |   |    |   |
|--------|---|-------------|-------------|----|---|----|---|
| Case 2 | 4 | 27,412,242  | 35,538,439  | 3  | 0 | 3  | 1 |
| Case 2 | 4 | 35,554,589  | 37,336,553  | 7  | 3 | 10 | 0 |
| Case 2 | 4 | 37,336,803  | 39,409,066  | 6  | 2 | 8  | 0 |
| Case 2 | 4 | 39,414,993  | 40,905,726  | 10 | 2 | 12 | 0 |
| Case 2 | 4 | 40,913,247  | 43,115,315  | 4  | 0 | 4  | 1 |
| Case 2 | 4 | 43,124,710  | 47,350,872  | 3  | 0 | 3  | 1 |
| Case 2 | 4 | 47,356,566  | 49,620,898  | 4  | 0 | 4  | 1 |
| Case 2 | 4 | 52,697,856  | 58,671,636  | 4  | 0 | 4  | 1 |
| Case 2 | 4 | 58,674,284  | 71,045,118  | 3  | 0 | 3  | 1 |
| Case 2 | 4 | 71,046,288  | 91,516,422  | 4  | 0 | 4  | 1 |
| Case 2 | 4 | 91,524,285  | 91,606,389  | 6  | 0 | 6  | 1 |
| Case 2 | 4 | 91,607,363  | 124,316,684 | 3  | 0 | 3  | 1 |
| Case 2 | 4 | 124,320,924 | 128,063,104 | 5  | 0 | 5  | 1 |
| Case 2 | 4 | 128,064,562 | 155,351,627 | 5  | 2 | 7  | 0 |
| Case 2 | 4 | 155,354,916 | 155,786,387 | 2  | 1 | 3  | 0 |
| Case 2 | 4 | 155,790,646 | 155,947,430 | 7  | 2 | 9  | 0 |
| Case 2 | 4 | 155,951,509 | 160,607,399 | 9  | 1 | 10 | 0 |
| Case 2 | 4 | 160,609,723 | 190,963,766 | 2  | 1 | 3  | 0 |
| Case 2 | 5 | 38,139      | 11,597,332  | 8  | 0 | 8  | 1 |
| Case 2 | 5 | 11,599,392  | 13,598,206  | 10 | 0 | 10 | 1 |
| Case 2 | 5 | 13,601,207  | 17,415,197  | 9  | 0 | 9  | 1 |
| Case 2 | 5 | 17,418,256  | 29,779,148  | 10 | 0 | 10 | 1 |
| Case 2 | 5 | 29,780,433  | 40,497,604  | 9  | 0 | 9  | 1 |
| Case 2 | 5 | 40,520,217  | 46,399,093  | 12 | 0 | 12 | 1 |
| Case 2 | 5 | 49,457,282  | 58,313,560  | 4  | 0 | 4  | 1 |
| Case 2 | 5 | 58,317,865  | 58,511,501  | 0  | 0 | 0  | 0 |
| Case 2 | 5 | 58,515,481  | 66,466,279  | 4  | 0 | 4  | 1 |
| Case 2 | 5 | 66,473,092  | 73,971,777  | 5  | 0 | 5  | 1 |
| Case 2 | 5 | 73,973,651  | 151,931,892 | 4  | 0 | 4  | 1 |
| Case 2 | 5 | 151,939,650 | 153,638,793 | 6  | 0 | 6  | 1 |
| Case 2 | 5 | 153,645,178 | 180,693,127 | 4  | 0 | 4  | 1 |
| Case 2 | 6 | 108,666     | 31,319,355  | 5  | 2 | 7  | 0 |
| Case 2 | 6 | 31,320,538  | 44,671,471  | 4  | 2 | 6  | 0 |
| Case 2 | 6 | 44,674,614  | 58,752,089  | 5  | 2 | 7  | 0 |
| Case 2 | 6 | 61,891,118  | 104,403,825 | 5  | 2 | 7  | 0 |
| Case 2 | 6 | 104,407,049 | 104,501,198 | 4  | 2 | 6  | 0 |
| Case 2 | 6 | 104,503,032 | 170,980,171 | 5  | 2 | 7  | 0 |
| Case 2 | 7 | 44,935      | 7,031,261   | 3  | 2 | 5  | 0 |
| Case 2 | 7 | 7,040,309   | 9,587,536   | 2  | 2 | 4  | 0 |
| Case 2 | 7 | 9,591,668   | 12,418,638  | 3  | 2 | 5  | 0 |
| Case 2 | 7 | 12,418,964  | 12,428,803  | 2  | 2 | 4  | 0 |
| Case 2 | 7 | 12,429,488  | 57,513,009  | 3  | 2 | 5  | 0 |
| Case 2 | 7 | 57,517,019  | 58,019,061  | 3  | 1 | 4  | 0 |
| Case 2 | 7 | 61,056,053  | 62,662,471  | 3  | 1 | 4  | 0 |
| Case 2 | 7 | 62,675,942  | 70,434,205  | 3  | 2 | 5  | 0 |
| Case 2 | 7 | 70,449,956  | 70,788,156  | 2  | 0 | 2  | 1 |
| Case 2 | 7 | 70,798,935  | 159,119,486 | 3  | 2 | 5  | 0 |
| Case 2 | 8 | 164,984     | 2,354,194   | 8  | 1 | 9  | 0 |
| Case 2 | 8 | 2,355,745   | 5,206,751   | 9  | 1 | 10 | 0 |
| Case 2 | 8 | 5,207,483   | 6,755,820   | 8  | 1 | 9  | 0 |
| Case 2 | 8 | 6,760,142   | 10,751,709  | 7  | 2 | 9  | 0 |
| Case 2 | 8 | 10,754,511  | 11,477,956  | 10 | 1 | 11 | 0 |
| Case 2 | 8 | 11,479,356  | 11,503,979  | 14 | 0 | 14 | 1 |
| Case 2 | 8 | 11,504,919  | 12,483,094  | 12 | 0 | 12 | 1 |
| Case 2 | 8 | 12,494,265  | 43,791,691  | 5  | 2 | 7  | 0 |
| Case 2 | 8 | 46,886,735  | 47,741,619  | 5  | 2 | 7  | 0 |
| Case 2 | 8 | 47,757,290  | 75,941,664  | 6  | 2 | 8  | 0 |
| Case 2 | 8 | 75,945,850  | 76,492,185  | 7  | 2 | 9  | 0 |
| Case 2 | 8 | 76,519,834  | 79,009,590  | 6  | 2 | 8  | 0 |
| Case 2 | 8 | 79,013,333  | 80,658,272  | 6  | 1 | 7  | 0 |
| Case 2 | 8 | 80,658,578  | 127,621,549 | 6  | 2 | 8  | 0 |



|        |    |             |             |   |   |   |   |
|--------|----|-------------|-------------|---|---|---|---|
| Case 2 | 8  | 127,622,258 | 127,696,127 | 6 | 1 | 7 | 0 |
| Case 2 | 8  | 127,701,327 | 141,584,017 | 6 | 2 | 8 | 0 |
| Case 2 | 8  | 141,587,404 | 146,293,414 | 5 | 2 | 7 | 0 |
| Case 2 | 9  | 46,587      | 46,944,322  | 3 | 1 | 4 | 0 |
| Case 2 | 9  | 65,629,772  | 141,066,491 | 3 | 1 | 4 | 0 |
| Case 2 | 10 | 98,087      | 38,995,349  | 5 | 2 | 7 | 0 |
| Case 2 | 10 | 39,011,138  | 39,097,912  | 6 | 1 | 7 | 0 |
| Case 2 | 10 | 42,436,301  | 42,794,125  | 6 | 1 | 7 | 0 |
| Case 2 | 10 | 42,794,377  | 95,102,221  | 5 | 2 | 7 | 0 |
| Case 2 | 10 | 95,102,371  | 134,261,811 | 4 | 2 | 6 | 0 |
| Case 2 | 10 | 134,267,284 | 135,477,883 | 5 | 2 | 7 | 0 |
| Case 2 | 11 | 193,146     | 1,581,028   | 4 | 1 | 5 | 0 |
| Case 2 | 11 | 1,607,346   | 1,642,602   | 3 | 0 | 3 | 1 |
| Case 2 | 11 | 1,643,728   | 20,298,798  | 4 | 1 | 5 | 0 |
| Case 2 | 11 | 20,299,460  | 20,534,286  | 3 | 1 | 4 | 0 |
| Case 2 | 11 | 20,537,099  | 29,800,723  | 4 | 1 | 5 | 0 |
| Case 2 | 11 | 29,800,788  | 41,845,688  | 3 | 1 | 4 | 0 |
| Case 2 | 11 | 41,852,664  | 51,591,253  | 4 | 1 | 5 | 0 |
| Case 2 | 11 | 54,794,237  | 88,520,396  | 4 | 1 | 5 | 0 |
| Case 2 | 11 | 88,522,049  | 91,390,397  | 3 | 1 | 4 | 0 |
| Case 2 | 11 | 91,407,305  | 95,931,485  | 4 | 1 | 5 | 0 |
| Case 2 | 11 | 95,933,123  | 100,210,323 | 3 | 1 | 4 | 0 |
| Case 2 | 11 | 100,214,691 | 134,934,063 | 4 | 1 | 5 | 0 |
| Case 2 | 12 | 191,619     | 34,853,011  | 3 | 2 | 5 | 0 |
| Case 2 | 12 | 37,876,400  | 84,165,561  | 3 | 2 | 5 | 0 |
| Case 2 | 12 | 84,166,302  | 84,229,254  | 3 | 1 | 4 | 0 |
| Case 2 | 12 | 84,231,077  | 133,810,935 | 3 | 2 | 5 | 0 |
| Case 2 | 13 | 19,058,717  | 21,612,791  | 3 | 2 | 5 | 0 |
| Case 2 | 13 | 21,620,085  | 22,105,533  | 2 | 1 | 3 | 0 |
| Case 2 | 13 | 22,115,822  | 44,826,508  | 3 | 3 | 6 | 0 |
| Case 2 | 13 | 44,826,634  | 50,589,718  | 3 | 2 | 5 | 0 |
| Case 2 | 13 | 50,589,768  | 50,811,155  | 3 | 1 | 4 | 0 |
| Case 2 | 13 | 50,811,220  | 115,103,529 | 3 | 2 | 5 | 0 |
| Case 2 | 14 | 19,280,733  | 20,444,162  | 4 | 1 | 5 | 0 |
| Case 2 | 14 | 20,444,182  | 26,426,467  | 3 | 2 | 5 | 0 |
| Case 2 | 14 | 26,428,398  | 97,071,607  | 2 | 2 | 4 | 0 |
| Case 2 | 14 | 97,072,049  | 97,173,393  | 3 | 2 | 5 | 0 |
| Case 2 | 14 | 97,173,569  | 107,287,663 | 2 | 2 | 4 | 0 |
| Case 2 | 15 | 20,034,919  | 46,181,244  | 2 | 2 | 4 | 0 |
| Case 2 | 15 | 46,195,108  | 57,608,311  | 2 | 1 | 3 | 0 |
| Case 2 | 15 | 57,608,692  | 57,842,519  | 2 | 2 | 4 | 0 |
| Case 2 | 15 | 57,843,391  | 102,461,162 | 2 | 1 | 3 | 0 |
| Case 2 | 16 | 88,165      | 35,285,582  | 4 | 0 | 4 | 1 |
| Case 2 | 16 | 46,450,037  | 78,829,493  | 4 | 0 | 4 | 1 |
| Case 2 | 16 | 78,829,975  | 78,842,778  | 1 | 0 | 1 | 0 |
| Case 2 | 16 | 78,843,942  | 90,274,695  | 4 | 0 | 4 | 1 |
| Case 2 | 17 | 11,885      | 674,696     | 3 | 0 | 3 | 1 |
| Case 2 | 17 | 677,226     | 793,117     | 4 | 0 | 4 | 1 |
| Case 2 | 17 | 796,091     | 1,084,331   | 6 | 0 | 6 | 1 |
| Case 2 | 17 | 1,084,729   | 22,242,355  | 4 | 0 | 4 | 1 |
| Case 2 | 17 | 25,268,142  | 25,268,142  | 4 | 0 | 4 | 1 |
| Case 2 | 17 | 25,295,032  | 34,436,532  | 6 | 0 | 6 | 1 |
| Case 2 | 17 | 34,436,708  | 48,046,960  | 5 | 1 | 6 | 0 |
| Case 2 | 17 | 48,046,963  | 79,587,635  | 6 | 0 | 6 | 1 |
| Case 2 | 17 | 79,596,811  | 80,004,050  | 3 | 0 | 3 | 1 |
| Case 2 | 17 | 80,004,769  | 81,060,040  | 6 | 0 | 6 | 1 |
| Case 2 | 18 | 87,505      | 1,065,924   | 3 | 0 | 3 | 1 |
| Case 2 | 18 | 1,078,002   | 2,822,545   | 2 | 0 | 2 | 1 |
| Case 2 | 18 | 2,825,377   | 3,997,976   | 3 | 0 | 3 | 1 |
| Case 2 | 18 | 3,998,799   | 4,971,659   | 2 | 0 | 2 | 1 |
| Case 2 | 18 | 4,976,160   | 8,031,623   | 3 | 0 | 3 | 1 |

|        |    |             |             |   |   |   |   |
|--------|----|-------------|-------------|---|---|---|---|
| Case 2 | 18 | 8,034,941   | 9,869,011   | 8 | 0 | 8 | 1 |
| Case 2 | 18 | 9,869,865   | 10,581,304  | 6 | 0 | 6 | 1 |
| Case 2 | 18 | 10,590,943  | 10,832,851  | 4 | 0 | 4 | 1 |
| Case 2 | 18 | 10,834,568  | 12,104,638  | 7 | 0 | 7 | 1 |
| Case 2 | 18 | 12,107,012  | 13,640,802  | 9 | 0 | 9 | 1 |
| Case 2 | 18 | 13,642,721  | 14,090,271  | 7 | 0 | 7 | 1 |
| Case 2 | 18 | 14,090,403  | 15,375,878  | 4 | 0 | 4 | 1 |
| Case 2 | 18 | 18,520,354  | 19,155,511  | 4 | 0 | 4 | 1 |
| Case 2 | 18 | 19,156,645  | 19,814,796  | 6 | 0 | 6 | 1 |
| Case 2 | 18 | 19,823,874  | 20,138,106  | 5 | 0 | 5 | 1 |
| Case 2 | 18 | 20,146,740  | 20,977,523  | 7 | 0 | 7 | 1 |
| Case 2 | 18 | 20,996,401  | 24,461,018  | 3 | 0 | 3 | 1 |
| Case 2 | 18 | 24,462,611  | 28,145,331  | 2 | 0 | 2 | 1 |
| Case 2 | 18 | 28,148,384  | 35,719,478  | 3 | 0 | 3 | 1 |
| Case 2 | 18 | 35,720,709  | 42,240,410  | 2 | 0 | 2 | 1 |
| Case 2 | 18 | 42,240,598  | 61,910,040  | 3 | 0 | 3 | 1 |
| Case 2 | 18 | 61,917,239  | 67,360,455  | 2 | 0 | 2 | 1 |
| Case 2 | 18 | 67,363,195  | 68,157,794  | 3 | 0 | 3 | 1 |
| Case 2 | 18 | 68,166,567  | 70,302,321  | 2 | 0 | 2 | 1 |
| Case 2 | 18 | 70,304,838  | 78,015,180  | 3 | 0 | 3 | 1 |
| Case 2 | 19 | 260,912     | 24,629,285  | 3 | 1 | 4 | 0 |
| Case 2 | 19 | 27,732,159  | 59,097,160  | 3 | 1 | 4 | 0 |
| Case 2 | 20 | 63,244      | 9,920,824   | 4 | 2 | 6 | 0 |
| Case 2 | 20 | 9,925,555   | 13,199,299  | 3 | 2 | 5 | 0 |
| Case 2 | 20 | 13,204,935  | 13,565,291  | 4 | 2 | 6 | 0 |
| Case 2 | 20 | 13,582,476  | 14,066,373  | 4 | 3 | 7 | 0 |
| Case 2 | 20 | 14,070,869  | 15,818,280  | 4 | 2 | 6 | 0 |
| Case 2 | 20 | 15,819,495  | 17,433,598  | 5 | 2 | 7 | 0 |
| Case 2 | 20 | 17,436,473  | 18,226,696  | 4 | 2 | 6 | 0 |
| Case 2 | 20 | 18,227,170  | 19,255,800  | 6 | 2 | 8 | 0 |
| Case 2 | 20 | 19,256,240  | 26,293,985  | 4 | 2 | 6 | 0 |
| Case 2 | 20 | 29,425,357  | 62,948,788  | 4 | 2 | 6 | 0 |
| Case 2 | 21 | 10,827,533  | 10,971,337  | 3 | 0 | 3 | 1 |
| Case 2 | 21 | 14,368,320  | 20,773,681  | 3 | 0 | 3 | 1 |
| Case 2 | 21 | 20,779,299  | 21,150,015  | 0 | 0 | 0 | 0 |
| Case 2 | 21 | 21,168,116  | 26,386,200  | 3 | 0 | 3 | 1 |
| Case 2 | 21 | 26,392,671  | 38,428,649  | 4 | 0 | 4 | 1 |
| Case 2 | 21 | 38,429,389  | 48,100,155  | 3 | 0 | 3 | 1 |
| Case 2 | 22 | 16,114,244  | 21,423,933  | 2 | 2 | 4 | 0 |
| Case 2 | 22 | 21,424,414  | 22,599,549  | 2 | 1 | 3 | 0 |
| Case 2 | 22 | 22,599,607  | 51,195,728  | 2 | 2 | 4 | 0 |
| Case 2 | X  | 2,700,157   | 58,488,110  | 3 | 1 | 4 | 0 |
| Case 2 | X  | 61,694,576  | 154,898,561 | 3 | 1 | 4 | 0 |
| Case 4 | 1  | 82,154      | 121,346,616 | 1 | 1 | 2 | 0 |
| Case 4 | 1  | 142,649,718 | 249,218,992 | 1 | 1 | 2 | 0 |
| Case 4 | 2  | 18,674      | 92,081,640  | 1 | 1 | 2 | 0 |
| Case 4 | 2  | 95,429,424  | 205,172,592 | 1 | 1 | 2 | 0 |
| Case 4 | 2  | 205,177,507 | 205,525,273 | 2 | 1 | 3 | 0 |
| Case 4 | 2  | 205,536,648 | 243,048,760 | 1 | 1 | 2 | 0 |
| Case 4 | 3  | 61,495      | 60,337,651  | 1 | 1 | 2 | 0 |
| Case 4 | 3  | 60,340,650  | 60,358,517  | 1 | 0 | 1 | 0 |
| Case 4 | 3  | 60,360,747  | 60,523,330  | 0 | 0 | 0 | 0 |
| Case 4 | 3  | 60,531,242  | 60,631,936  | 1 | 0 | 1 | 0 |
| Case 4 | 3  | 60,636,061  | 90,442,925  | 1 | 1 | 2 | 0 |
| Case 4 | 3  | 93,537,290  | 197,838,262 | 1 | 1 | 2 | 0 |
| Case 4 | 4  | 71,566      | 49,620,898  | 1 | 1 | 2 | 0 |
| Case 4 | 4  | 52,697,856  | 151,547,243 | 1 | 1 | 2 | 0 |
| Case 4 | 4  | 151,574,839 | 151,887,280 | 1 | 0 | 1 | 0 |
| Case 4 | 4  | 151,901,433 | 190,963,766 | 1 | 1 | 2 | 0 |
| Case 4 | 5  | 38,139      | 32,101,318  | 1 | 1 | 2 | 0 |
| Case 4 | 5  | 32,101,400  | 32,159,517  | 2 | 1 | 3 | 0 |

|        |    |             |             |   |   |   |   |
|--------|----|-------------|-------------|---|---|---|---|
| Case 4 | 5  | 32,169,547  | 46,399,093  | 1 | 1 | 2 | 0 |
| Case 4 | 5  | 49,457,282  | 178,724,727 | 1 | 1 | 2 | 0 |
| Case 4 | 5  | 178,730,062 | 178,935,665 | 2 | 1 | 3 | 0 |
| Case 4 | 5  | 178,936,722 | 180,693,127 | 1 | 1 | 2 | 0 |
| Case 4 | 6  | 108,666     | 45,339,067  | 2 | 0 | 2 | 1 |
| Case 4 | 6  | 45,349,497  | 58,752,089  | 1 | 1 | 2 | 0 |
| Case 4 | 6  | 61,891,118  | 170,980,171 | 1 | 1 | 2 | 0 |
| Case 4 | 7  | 44,935      | 58,019,061  | 1 | 1 | 2 | 0 |
| Case 4 | 7  | 61,056,053  | 153,478,281 | 1 | 1 | 2 | 0 |
| Case 4 | 7  | 153,485,627 | 153,670,448 | 2 | 1 | 3 | 0 |
| Case 4 | 7  | 153,696,268 | 159,119,486 | 1 | 1 | 2 | 0 |
| Case 4 | 8  | 164,984     | 43,052,839  | 2 | 0 | 2 | 1 |
| Case 4 | 8  | 43,053,000  | 43,791,691  | 1 | 1 | 2 | 0 |
| Case 4 | 8  | 46,886,735  | 146,293,414 | 1 | 1 | 2 | 0 |
| Case 4 | 9  | 46,587      | 46,944,322  | 1 | 1 | 2 | 0 |
| Case 4 | 9  | 65,629,772  | 141,066,491 | 1 | 1 | 2 | 0 |
| Case 4 | 10 | 98,087      | 39,097,912  | 1 | 1 | 2 | 0 |
| Case 4 | 10 | 42,436,301  | 75,051,708  | 1 | 1 | 2 | 0 |
| Case 4 | 10 | 75,056,863  | 110,093,190 | 2 | 0 | 2 | 1 |
| Case 4 | 10 | 110,108,512 | 110,216,429 | 3 | 0 | 3 | 1 |
| Case 4 | 10 | 110,221,750 | 135,477,883 | 2 | 0 | 2 | 1 |
| Case 4 | 11 | 193,146     | 51,591,253  | 1 | 1 | 2 | 0 |
| Case 4 | 11 | 54,794,237  | 134,934,063 | 1 | 1 | 2 | 0 |
| Case 4 | 12 | 191,619     | 34,853,011  | 1 | 1 | 2 | 0 |
| Case 4 | 12 | 37,876,400  | 133,810,935 | 1 | 1 | 2 | 0 |
| Case 4 | 13 | 19,058,717  | 115,103,529 | 1 | 1 | 2 | 0 |
| Case 4 | 14 | 19,280,733  | 22,590,996  | 1 | 1 | 2 | 0 |
| Case 4 | 14 | 22,591,988  | 22,964,782  | 2 | 1 | 3 | 0 |
| Case 4 | 14 | 22,966,662  | 107,287,663 | 1 | 1 | 2 | 0 |
| Case 4 | 15 | 20,034,919  | 102,461,162 | 1 | 1 | 2 | 0 |
| Case 4 | 16 | 88,165      | 35,285,582  | 1 | 1 | 2 | 0 |
| Case 4 | 16 | 46,450,037  | 78,952,439  | 1 | 1 | 2 | 0 |
| Case 4 | 16 | 78,953,857  | 79,235,804  | 2 | 1 | 3 | 0 |
| Case 4 | 16 | 79,236,908  | 90,274,695  | 1 | 1 | 2 | 0 |
| Case 4 | 17 | 11,885      | 22,242,355  | 1 | 1 | 2 | 0 |
| Case 4 | 17 | 25,268,142  | 34,443,811  | 1 | 1 | 2 | 0 |
| Case 4 | 17 | 34,445,325  | 34,597,521  | 2 | 1 | 3 | 0 |
| Case 4 | 17 | 34,815,551  | 81,060,040  | 1 | 1 | 2 | 0 |
| Case 4 | 18 | 87,505      | 15,375,878  | 1 | 1 | 2 | 0 |
| Case 4 | 18 | 18,520,354  | 25,978,719  | 1 | 1 | 2 | 0 |
| Case 4 | 18 | 26,010,927  | 78,015,180  | 1 | 0 | 1 | 0 |
| Case 4 | 19 | 260,912     | 24,629,285  | 1 | 1 | 2 | 0 |
| Case 4 | 19 | 27,732,159  | 59,097,160  | 1 | 1 | 2 | 0 |
| Case 4 | 20 | 63,244      | 26,293,985  | 1 | 1 | 2 | 0 |
| Case 4 | 20 | 29,425,357  | 62,948,788  | 1 | 1 | 2 | 0 |
| Case 4 | 21 | 10,827,533  | 10,971,337  | 1 | 1 | 2 | 0 |
| Case 4 | 21 | 14,368,320  | 48,100,155  | 1 | 1 | 2 | 0 |
| Case 4 | 22 | 16,114,244  | 26,773,254  | 1 | 1 | 2 | 0 |
| Case 4 | 22 | 26,774,580  | 51,195,728  | 2 | 0 | 2 | 1 |
| Case 4 | X  | 2,700,157   | 58,488,110  | 1 | 0 | 1 | 0 |
| Case 4 | X  | 61,694,576  | 154,898,561 | 1 | 0 | 1 | 0 |
| Case 6 | 1  | 82,154      | 121,346,616 | 1 | 1 | 2 | 0 |
| Case 6 | 1  | 142,649,718 | 249,218,992 | 1 | 1 | 2 | 0 |
| Case 6 | 2  | 18,674      | 92,081,640  | 1 | 1 | 2 | 0 |
| Case 6 | 2  | 95,429,424  | 243,048,760 | 1 | 1 | 2 | 0 |
| Case 6 | 3  | 61,495      | 90,442,925  | 1 | 1 | 2 | 0 |
| Case 6 | 3  | 93,537,290  | 197,838,262 | 1 | 1 | 2 | 0 |
| Case 6 | 4  | 71,566      | 49,620,898  | 1 | 1 | 2 | 0 |
| Case 6 | 4  | 52,697,856  | 190,963,766 | 1 | 1 | 2 | 0 |
| Case 6 | 5  | 38,139      | 46,399,093  | 1 | 1 | 2 | 0 |
| Case 6 | 5  | 49,457,282  | 180,693,127 | 1 | 1 | 2 | 0 |

|         |    |             |             |   |   |   |   |
|---------|----|-------------|-------------|---|---|---|---|
| Case 6  | 6  | 108,666     | 58,752,089  | 1 | 1 | 2 | 0 |
| Case 6  | 6  | 61,891,118  | 170,980,171 | 1 | 1 | 2 | 0 |
| Case 6  | 7  | 44,935      | 17,407,061  | 1 | 1 | 2 | 0 |
| Case 6  | 7  | 17,425,895  | 17,472,677  | 2 | 1 | 3 | 0 |
| Case 6  | 7  | 17,475,607  | 58,019,061  | 1 | 1 | 2 | 0 |
| Case 6  | 7  | 61,056,053  | 159,119,486 | 1 | 1 | 2 | 0 |
| Case 6  | 8  | 164,984     | 43,791,691  | 1 | 1 | 2 | 0 |
| Case 6  | 8  | 46,886,735  | 146,293,414 | 1 | 1 | 2 | 0 |
| Case 6  | 9  | 46,587      | 46,944,322  | 1 | 1 | 2 | 0 |
| Case 6  | 9  | 65,629,772  | 141,066,491 | 1 | 1 | 2 | 0 |
| Case 6  | 10 | 98,087      | 39,097,912  | 1 | 1 | 2 | 0 |
| Case 6  | 10 | 42,436,301  | 135,477,883 | 1 | 1 | 2 | 0 |
| Case 6  | 11 | 193,146     | 51,591,253  | 1 | 1 | 2 | 0 |
| Case 6  | 11 | 54,794,237  | 134,934,063 | 1 | 1 | 2 | 0 |
| Case 6  | 12 | 191,619     | 34,853,011  | 1 | 1 | 2 | 0 |
| Case 6  | 12 | 37,876,400  | 133,810,935 | 1 | 1 | 2 | 0 |
| Case 6  | 13 | 19,058,717  | 115,103,529 | 1 | 1 | 2 | 0 |
| Case 6  | 14 | 19,280,733  | 107,287,663 | 1 | 1 | 2 | 0 |
| Case 6  | 15 | 20,034,919  | 102,461,162 | 1 | 1 | 2 | 0 |
| Case 6  | 16 | 88,165      | 35,285,582  | 1 | 1 | 2 | 0 |
| Case 6  | 16 | 46,450,037  | 90,274,695  | 1 | 1 | 2 | 0 |
| Case 6  | 17 | 11,885      | 22,242,355  | 1 | 1 | 2 | 0 |
| Case 6  | 17 | 25,268,142  | 81,060,040  | 1 | 1 | 2 | 0 |
| Case 6  | 18 | 87,505      | 15,375,878  | 1 | 1 | 2 | 0 |
| Case 6  | 18 | 18,520,354  | 78,015,180  | 1 | 1 | 2 | 0 |
| Case 6  | 19 | 260,912     | 24,629,285  | 1 | 1 | 2 | 0 |
| Case 6  | 19 | 27,732,159  | 59,097,160  | 1 | 1 | 2 | 0 |
| Case 6  | 20 | 63,244      | 26,293,985  | 1 | 1 | 2 | 0 |
| Case 6  | 20 | 29,425,357  | 62,948,788  | 1 | 1 | 2 | 0 |
| Case 6  | 21 | 10,827,533  | 10,971,337  | 1 | 1 | 2 | 0 |
| Case 6  | 21 | 14,368,320  | 48,100,155  | 1 | 1 | 2 | 0 |
| Case 6  | 22 | 16,114,244  | 51,195,728  | 1 | 1 | 2 | 0 |
| Case 6  | X  | 2,700,157   | 58,488,110  | 1 | 0 | 1 | 0 |
| Case 6  | X  | 61,694,576  | 154,898,561 | 1 | 0 | 1 | 0 |
| Case 14 | 1  | 82,154      | 1,731,756   | 2 | 1 | 3 | 0 |
| Case 14 | 1  | 1,745,726   | 8,982,906   | 3 | 0 | 3 | 1 |
| Case 14 | 1  | 8,983,768   | 61,368,719  | 2 | 1 | 3 | 0 |
| Case 14 | 1  | 61,368,955  | 61,409,238  | 3 | 2 | 5 | 0 |
| Case 14 | 1  | 61,409,566  | 67,937,751  | 2 | 1 | 3 | 0 |
| Case 14 | 1  | 67,941,167  | 68,364,218  | 3 | 2 | 5 | 0 |
| Case 14 | 1  | 68,366,925  | 110,950,462 | 2 | 1 | 3 | 0 |
| Case 14 | 1  | 110,950,485 | 111,041,925 | 2 | 2 | 4 | 0 |
| Case 14 | 1  | 111,044,227 | 121,346,616 | 2 | 1 | 3 | 0 |
| Case 14 | 1  | 142,649,718 | 154,450,730 | 2 | 1 | 3 | 0 |
| Case 14 | 1  | 154,451,420 | 164,666,253 | 3 | 2 | 5 | 0 |
| Case 14 | 1  | 164,666,940 | 164,730,178 | 4 | 2 | 6 | 0 |
| Case 14 | 1  | 164,732,727 | 179,695,998 | 3 | 2 | 5 | 0 |
| Case 14 | 1  | 179,700,133 | 179,790,518 | 2 | 1 | 3 | 0 |
| Case 14 | 1  | 179,794,602 | 233,160,950 | 3 | 2 | 5 | 0 |
| Case 14 | 1  | 233,161,822 | 233,256,280 | 3 | 1 | 4 | 0 |
| Case 14 | 1  | 233,262,943 | 235,710,276 | 3 | 2 | 5 | 0 |
| Case 14 | 1  | 235,714,162 | 236,143,898 | 2 | 1 | 3 | 0 |
| Case 14 | 1  | 236,144,754 | 240,402,395 | 2 | 2 | 4 | 0 |
| Case 14 | 1  | 240,403,189 | 240,666,156 | 2 | 0 | 2 | 1 |
| Case 14 | 1  | 240,666,644 | 242,121,796 | 2 | 2 | 4 | 0 |
| Case 14 | 1  | 242,127,836 | 242,332,289 | 1 | 1 | 2 | 0 |
| Case 14 | 1  | 242,342,504 | 242,531,619 | 2 | 2 | 4 | 0 |
| Case 14 | 1  | 242,531,654 | 242,578,674 | 2 | 1 | 3 | 0 |
| Case 14 | 1  | 242,580,359 | 243,119,242 | 2 | 2 | 4 | 0 |
| Case 14 | 1  | 243,147,031 | 243,609,927 | 3 | 2 | 5 | 0 |
| Case 14 | 1  | 243,613,748 | 244,149,760 | 2 | 0 | 2 | 1 |

|         |   |             |             |   |   |   |   |
|---------|---|-------------|-------------|---|---|---|---|
| Case 14 | 1 | 244,150,083 | 245,819,228 | 2 | 2 | 4 | 0 |
| Case 14 | 1 | 245,822,899 | 245,932,939 | 3 | 2 | 5 | 0 |
| Case 14 | 1 | 245,936,738 | 247,715,998 | 2 | 0 | 2 | 1 |
| Case 14 | 1 | 247,719,377 | 248,059,798 | 3 | 2 | 5 | 0 |
| Case 14 | 1 | 248,059,856 | 249,218,992 | 2 | 2 | 4 | 0 |
| Case 14 | 2 | 18,674      | 5,560,403   | 2 | 2 | 4 | 0 |
| Case 14 | 2 | 5,564,064   | 5,583,563   | 3 | 2 | 5 | 0 |
| Case 14 | 2 | 5,586,877   | 18,794,610  | 2 | 2 | 4 | 0 |
| Case 14 | 2 | 18,795,283  | 18,907,874  | 2 | 1 | 3 | 0 |
| Case 14 | 2 | 18,914,751  | 38,302,361  | 2 | 2 | 4 | 0 |
| Case 14 | 2 | 38,302,497  | 38,445,779  | 3 | 2 | 5 | 0 |
| Case 14 | 2 | 38,447,523  | 48,566,031  | 2 | 2 | 4 | 0 |
| Case 14 | 2 | 48,579,778  | 48,604,978  | 2 | 1 | 3 | 0 |
| Case 14 | 2 | 48,610,367  | 92,081,640  | 2 | 2 | 4 | 0 |
| Case 14 | 2 | 95,429,424  | 169,002,934 | 2 | 2 | 4 | 0 |
| Case 14 | 2 | 169,004,125 | 169,519,631 | 3 | 2 | 5 | 0 |
| Case 14 | 2 | 169,527,132 | 241,699,883 | 2 | 2 | 4 | 0 |
| Case 14 | 2 | 241,708,675 | 242,066,796 | 2 | 1 | 3 | 0 |
| Case 14 | 2 | 242,066,830 | 243,048,760 | 2 | 2 | 4 | 0 |
| Case 14 | 3 | 61,495      | 3,276,014   | 2 | 1 | 3 | 0 |
| Case 14 | 3 | 3,277,275   | 5,907,990   | 3 | 1 | 4 | 0 |
| Case 14 | 3 | 5,913,291   | 6,389,075   | 3 | 0 | 3 | 1 |
| Case 14 | 3 | 6,389,368   | 17,196,846  | 3 | 1 | 4 | 0 |
| Case 14 | 3 | 17,198,623  | 23,871,730  | 2 | 1 | 3 | 0 |
| Case 14 | 3 | 23,873,602  | 25,605,101  | 3 | 1 | 4 | 0 |
| Case 14 | 3 | 25,605,886  | 29,925,518  | 2 | 1 | 3 | 0 |
| Case 14 | 3 | 29,928,319  | 31,488,222  | 3 | 1 | 4 | 0 |
| Case 14 | 3 | 31,489,457  | 36,311,133  | 2 | 1 | 3 | 0 |
| Case 14 | 3 | 36,311,231  | 60,337,651  | 3 | 1 | 4 | 0 |
| Case 14 | 3 | 60,340,650  | 60,562,113  | 1 | 1 | 2 | 0 |
| Case 14 | 3 | 60,562,327  | 60,689,476  | 2 | 0 | 2 | 1 |
| Case 14 | 3 | 60,691,605  | 60,830,545  | 2 | 1 | 3 | 0 |
| Case 14 | 3 | 60,838,518  | 61,253,495  | 1 | 1 | 2 | 0 |
| Case 14 | 3 | 61,262,149  | 74,364,811  | 3 | 1 | 4 | 0 |
| Case 14 | 3 | 74,365,556  | 90,442,925  | 2 | 1 | 3 | 0 |
| Case 14 | 3 | 93,537,290  | 99,005,053  | 2 | 1 | 3 | 0 |
| Case 14 | 3 | 99,006,939  | 143,421,221 | 3 | 1 | 4 | 0 |
| Case 14 | 3 | 143,421,571 | 148,476,957 | 2 | 1 | 3 | 0 |
| Case 14 | 3 | 148,477,713 | 150,257,082 | 3 | 1 | 4 | 0 |
| Case 14 | 3 | 150,259,668 | 163,917,341 | 2 | 1 | 3 | 0 |
| Case 14 | 3 | 163,922,738 | 163,983,338 | 2 | 0 | 2 | 1 |
| Case 14 | 3 | 163,994,508 | 167,635,818 | 2 | 1 | 3 | 0 |
| Case 14 | 3 | 167,635,899 | 190,253,665 | 3 | 1 | 4 | 0 |
| Case 14 | 3 | 190,255,192 | 192,079,832 | 2 | 1 | 3 | 0 |
| Case 14 | 3 | 192,079,951 | 194,414,147 | 3 | 1 | 4 | 0 |
| Case 14 | 3 | 194,415,887 | 194,612,501 | 3 | 0 | 3 | 1 |
| Case 14 | 3 | 194,616,355 | 197,838,262 | 2 | 1 | 3 | 0 |
| Case 14 | 4 | 71,566      | 19,517,296  | 2 | 1 | 3 | 0 |
| Case 14 | 4 | 19,525,991  | 19,684,918  | 1 | 0 | 1 | 0 |
| Case 14 | 4 | 19,696,428  | 49,620,898  | 2 | 1 | 3 | 0 |
| Case 14 | 4 | 52,697,856  | 74,588,938  | 2 | 1 | 3 | 0 |
| Case 14 | 4 | 74,588,998  | 74,628,455  | 3 | 2 | 5 | 0 |
| Case 14 | 4 | 74,657,255  | 152,826,032 | 2 | 1 | 3 | 0 |
| Case 14 | 4 | 152,832,903 | 153,245,269 | 1 | 0 | 1 | 0 |
| Case 14 | 4 | 153,252,061 | 161,848,243 | 2 | 1 | 3 | 0 |
| Case 14 | 4 | 161,851,303 | 161,924,832 | 4 | 1 | 5 | 0 |
| Case 14 | 4 | 161,935,342 | 162,243,468 | 2 | 1 | 3 | 0 |
| Case 14 | 4 | 162,248,546 | 162,840,766 | 2 | 0 | 2 | 1 |
| Case 14 | 4 | 162,841,653 | 164,572,108 | 2 | 1 | 3 | 0 |
| Case 14 | 4 | 164,575,991 | 165,307,934 | 2 | 0 | 2 | 1 |
| Case 14 | 4 | 165,314,229 | 168,442,929 | 2 | 1 | 3 | 0 |

|         |   |             |             |   |   |   |   |
|---------|---|-------------|-------------|---|---|---|---|
| Case 14 | 4 | 168,448,425 | 169,008,885 | 2 | 0 | 2 | 1 |
| Case 14 | 4 | 169,011,633 | 171,751,059 | 2 | 1 | 3 | 0 |
| Case 14 | 4 | 171,760,509 | 171,808,256 | 3 | 0 | 3 | 1 |
| Case 14 | 4 | 171,813,412 | 172,864,640 | 2 | 0 | 2 | 1 |
| Case 14 | 4 | 172,868,453 | 178,922,921 | 2 | 2 | 4 | 0 |
| Case 14 | 4 | 178,933,641 | 179,516,915 | 2 | 1 | 3 | 0 |
| Case 14 | 4 | 179,520,686 | 181,821,983 | 2 | 2 | 4 | 0 |
| Case 14 | 4 | 181,825,165 | 182,009,132 | 4 | 2 | 6 | 0 |
| Case 14 | 4 | 182,024,045 | 185,197,061 | 2 | 0 | 2 | 1 |
| Case 14 | 4 | 185,203,124 | 185,591,481 | 0 | 0 | 0 | 0 |
| Case 14 | 4 | 185,593,387 | 186,467,147 | 1 | 0 | 1 | 0 |
| Case 14 | 4 | 186,467,810 | 187,195,398 | 3 | 1 | 4 | 0 |
| Case 14 | 4 | 187,196,760 | 190,963,766 | 2 | 1 | 3 | 0 |
| Case 14 | 5 | 38,139      | 18,863,867  | 3 | 2 | 5 | 0 |
| Case 14 | 5 | 18,866,362  | 18,868,357  | 2 | 1 | 3 | 0 |
| Case 14 | 5 | 18,877,165  | 18,885,615  | 3 | 2 | 5 | 0 |
| Case 14 | 5 | 18,890,253  | 19,247,098  | 1 | 0 | 1 | 0 |
| Case 14 | 5 | 19,266,101  | 19,291,890  | 3 | 1 | 4 | 0 |
| Case 14 | 5 | 19,295,220  | 46,399,093  | 3 | 2 | 5 | 0 |
| Case 14 | 5 | 49,457,282  | 58,301,611  | 3 | 2 | 5 | 0 |
| Case 14 | 5 | 58,313,560  | 58,558,595  | 3 | 1 | 4 | 0 |
| Case 14 | 5 | 58,564,232  | 59,398,304  | 3 | 2 | 5 | 0 |
| Case 14 | 5 | 59,420,684  | 60,344,399  | 2 | 0 | 2 | 1 |
| Case 14 | 5 | 60,356,423  | 76,086,795  | 3 | 2 | 5 | 0 |
| Case 14 | 5 | 76,092,225  | 76,836,055  | 2 | 0 | 2 | 1 |
| Case 14 | 5 | 76,854,563  | 98,994,964  | 3 | 2 | 5 | 0 |
| Case 14 | 5 | 99,001,200  | 99,319,166  | 2 | 0 | 2 | 1 |
| Case 14 | 5 | 99,325,303  | 109,565,377 | 3 | 2 | 5 | 0 |
| Case 14 | 5 | 109,570,615 | 131,607,096 | 3 | 0 | 3 | 1 |
| Case 14 | 5 | 131,607,721 | 160,627,601 | 4 | 0 | 4 | 1 |
| Case 14 | 5 | 160,635,051 | 166,634,403 | 3 | 0 | 3 | 1 |
| Case 14 | 5 | 166,649,746 | 169,491,247 | 5 | 0 | 5 | 1 |
| Case 14 | 5 | 169,494,844 | 170,066,527 | 3 | 0 | 3 | 1 |
| Case 14 | 5 | 170,070,942 | 177,894,152 | 5 | 0 | 5 | 1 |
| Case 14 | 5 | 177,895,383 | 178,595,870 | 4 | 0 | 4 | 1 |
| Case 14 | 5 | 178,604,377 | 180,693,127 | 5 | 0 | 5 | 1 |
| Case 14 | 6 | 108,666     | 204,909     | 2 | 2 | 4 | 0 |
| Case 14 | 6 | 205,878     | 32,677,440  | 3 | 2 | 5 | 0 |
| Case 14 | 6 | 32,677,846  | 32,681,161  | 2 | 2 | 4 | 0 |
| Case 14 | 6 | 32,681,277  | 58,752,089  | 3 | 2 | 5 | 0 |
| Case 14 | 6 | 61,891,118  | 87,173,621  | 3 | 2 | 5 | 0 |
| Case 14 | 6 | 87,174,156  | 163,661,513 | 2 | 2 | 4 | 0 |
| Case 14 | 6 | 163,662,002 | 163,779,672 | 2 | 1 | 3 | 0 |
| Case 14 | 6 | 163,782,827 | 170,138,583 | 2 | 2 | 4 | 0 |
| Case 14 | 6 | 170,140,184 | 170,980,171 | 3 | 2 | 5 | 0 |
| Case 14 | 7 | 44,935      | 20,032,762  | 4 | 2 | 6 | 0 |
| Case 14 | 7 | 20,036,179  | 20,144,829  | 1 | 0 | 1 | 0 |
| Case 14 | 7 | 20,147,715  | 20,170,125  | 5 | 2 | 7 | 0 |
| Case 14 | 7 | 20,177,882  | 38,292,663  | 4 | 2 | 6 | 0 |
| Case 14 | 7 | 38,297,145  | 38,358,412  | 5 | 2 | 7 | 0 |
| Case 14 | 7 | 38,358,956  | 57,787,663  | 4 | 2 | 6 | 0 |
| Case 14 | 7 | 57,789,531  | 58,019,061  | 3 | 1 | 4 | 0 |
| Case 14 | 7 | 61,056,053  | 62,662,471  | 3 | 1 | 4 | 0 |
| Case 14 | 7 | 62,675,942  | 75,309,746  | 4 | 2 | 6 | 0 |
| Case 14 | 7 | 75,317,046  | 75,616,171  | 5 | 1 | 6 | 0 |
| Case 14 | 7 | 75,616,507  | 83,996,546  | 4 | 2 | 6 | 0 |
| Case 14 | 7 | 84,010,005  | 115,544,763 | 2 | 2 | 4 | 0 |
| Case 14 | 7 | 115,546,486 | 117,823,289 | 3 | 2 | 5 | 0 |
| Case 14 | 7 | 117,827,631 | 159,119,486 | 2 | 2 | 4 | 0 |
| Case 14 | 8 | 164,984     | 2,354,194   | 5 | 2 | 7 | 0 |
| Case 14 | 8 | 2,355,745   | 5,810,889   | 6 | 2 | 8 | 0 |

|         |    |             |             |   |   |   |   |
|---------|----|-------------|-------------|---|---|---|---|
| Case 14 | 8  | 5,815,774   | 13,490,995  | 5 | 2 | 7 | 0 |
| Case 14 | 8  | 13,492,542  | 19,189,125  | 6 | 2 | 8 | 0 |
| Case 14 | 8  | 19,189,757  | 38,971,606  | 5 | 2 | 7 | 0 |
| Case 14 | 8  | 38,975,368  | 39,751,406  | 6 | 2 | 8 | 0 |
| Case 14 | 8  | 39,769,375  | 43,791,691  | 5 | 2 | 7 | 0 |
| Case 14 | 8  | 46,886,735  | 58,678,194  | 5 | 2 | 7 | 0 |
| Case 14 | 8  | 58,679,518  | 58,779,457  | 6 | 3 | 9 | 0 |
| Case 14 | 8  | 58,780,481  | 135,025,593 | 6 | 0 | 6 | 1 |
| Case 14 | 8  | 135,026,160 | 135,068,340 | 0 | 0 | 0 | 0 |
| Case 14 | 8  | 135,070,667 | 146,293,414 | 6 | 0 | 6 | 1 |
| Case 14 | 9  | 46,587      | 46,944,322  | 2 | 2 | 4 | 0 |
| Case 14 | 9  | 65,629,772  | 135,120,155 | 4 | 2 | 6 | 0 |
| Case 14 | 9  | 135,126,458 | 136,991,034 | 2 | 2 | 4 | 0 |
| Case 14 | 9  | 136,992,903 | 137,253,447 | 4 | 2 | 6 | 0 |
| Case 14 | 9  | 137,256,078 | 141,066,491 | 2 | 2 | 4 | 0 |
| Case 14 | 10 | 98,087      | 10,978,266  | 2 | 2 | 4 | 0 |
| Case 14 | 10 | 10,982,410  | 10,996,596  | 2 | 1 | 3 | 0 |
| Case 14 | 10 | 11,000,339  | 39,097,912  | 2 | 2 | 4 | 0 |
| Case 14 | 10 | 42,436,301  | 46,159,151  | 2 | 2 | 4 | 0 |
| Case 14 | 10 | 46,167,847  | 47,703,869  | 4 | 2 | 6 | 0 |
| Case 14 | 10 | 48,047,289  | 68,583,924  | 2 | 2 | 4 | 0 |
| Case 14 | 10 | 68,585,502  | 68,734,898  | 2 | 1 | 3 | 0 |
| Case 14 | 10 | 68,736,018  | 118,963,970 | 2 | 2 | 4 | 0 |
| Case 14 | 10 | 118,966,996 | 119,468,305 | 4 | 2 | 6 | 0 |
| Case 14 | 10 | 119,471,333 | 135,477,883 | 2 | 2 | 4 | 0 |
| Case 14 | 11 | 193,146     | 51,591,253  | 2 | 1 | 3 | 0 |
| Case 14 | 11 | 54,794,237  | 134,934,063 | 2 | 1 | 3 | 0 |
| Case 14 | 12 | 191,619     | 34,853,011  | 2 | 2 | 4 | 0 |
| Case 14 | 12 | 37,876,400  | 38,118,144  | 2 | 2 | 4 | 0 |
| Case 14 | 12 | 38,120,936  | 38,416,139  | 1 | 1 | 2 | 0 |
| Case 14 | 12 | 38,424,982  | 88,811,799  | 2 | 2 | 4 | 0 |
| Case 14 | 12 | 88,821,166  | 89,128,000  | 1 | 1 | 2 | 0 |
| Case 14 | 12 | 89,154,218  | 101,711,341 | 2 | 2 | 4 | 0 |
| Case 14 | 12 | 101,713,141 | 102,576,340 | 4 | 2 | 6 | 0 |
| Case 14 | 12 | 102,589,900 | 113,672,577 | 2 | 2 | 4 | 0 |
| Case 14 | 12 | 113,677,451 | 114,106,177 | 2 | 1 | 3 | 0 |
| Case 14 | 12 | 114,114,550 | 133,810,935 | 2 | 2 | 4 | 0 |
| Case 14 | 13 | 19,058,717  | 22,770,518  | 4 | 2 | 6 | 0 |
| Case 14 | 13 | 22,771,301  | 28,115,859  | 3 | 2 | 5 | 0 |
| Case 14 | 13 | 28,116,998  | 93,768,862  | 4 | 2 | 6 | 0 |
| Case 14 | 13 | 93,774,541  | 93,816,293  | 6 | 2 | 8 | 0 |
| Case 14 | 13 | 93,831,475  | 115,103,529 | 4 | 2 | 6 | 0 |
| Case 14 | 14 | 19,280,733  | 20,425,051  | 4 | 1 | 5 | 0 |
| Case 14 | 14 | 20,426,742  | 22,204,568  | 3 | 2 | 5 | 0 |
| Case 14 | 14 | 22,204,911  | 22,589,341  | 4 | 2 | 6 | 0 |
| Case 14 | 14 | 22,590,877  | 22,964,782  | 4 | 3 | 7 | 0 |
| Case 14 | 14 | 22,966,662  | 107,287,663 | 3 | 2 | 5 | 0 |
| Case 14 | 15 | 20,034,919  | 57,251,485  | 2 | 2 | 4 | 0 |
| Case 14 | 15 | 57,257,958  | 57,445,710  | 2 | 1 | 3 | 0 |
| Case 14 | 15 | 57,448,455  | 92,469,694  | 2 | 2 | 4 | 0 |
| Case 14 | 15 | 92,471,689  | 92,535,081  | 3 | 2 | 5 | 0 |
| Case 14 | 15 | 92,537,445  | 102,461,162 | 2 | 2 | 4 | 0 |
| Case 14 | 16 | 88,165      | 18,026,445  | 2 | 2 | 4 | 0 |
| Case 14 | 16 | 18,034,704  | 18,124,560  | 2 | 1 | 3 | 0 |
| Case 14 | 16 | 18,129,657  | 35,285,582  | 2 | 2 | 4 | 0 |
| Case 14 | 16 | 46,450,037  | 78,569,957  | 2 | 2 | 4 | 0 |
| Case 14 | 16 | 78,571,750  | 78,757,979  | 2 | 1 | 3 | 0 |
| Case 14 | 16 | 78,760,933  | 90,274,695  | 2 | 2 | 4 | 0 |
| Case 14 | 17 | 11,885      | 9,267,285   | 3 | 0 | 3 | 1 |
| Case 14 | 17 | 9,268,390   | 9,564,119   | 2 | 0 | 2 | 1 |
| Case 14 | 17 | 9,565,411   | 11,188,372  | 3 | 0 | 3 | 1 |

|         |    |            |            |    |   |    |   |
|---------|----|------------|------------|----|---|----|---|
| Case 14 | 17 | 11,192,281 | 16,572,573 | 2  | 0 | 2  | 1 |
| Case 14 | 17 | 16,576,609 | 18,819,047 | 3  | 0 | 3  | 1 |
| Case 14 | 17 | 18,820,457 | 21,189,598 | 2  | 0 | 2  | 1 |
| Case 14 | 17 | 21,198,118 | 21,560,916 | 2  | 1 | 3  | 0 |
| Case 14 | 17 | 21,707,060 | 22,242,355 | 2  | 2 | 4  | 0 |
| Case 14 | 17 | 25,268,142 | 34,436,708 | 2  | 2 | 4  | 0 |
| Case 14 | 17 | 34,443,811 | 34,597,521 | 4  | 2 | 6  | 0 |
| Case 14 | 17 | 34,815,551 | 37,175,135 | 2  | 2 | 4  | 0 |
| Case 14 | 17 | 37,185,764 | 37,824,545 | 2  | 1 | 3  | 0 |
| Case 14 | 17 | 37,825,929 | 37,902,373 | 11 | 4 | 15 | 0 |
| Case 14 | 17 | 37,911,521 | 38,040,763 | 9  | 4 | 13 | 0 |
| Case 14 | 17 | 38,049,233 | 38,507,261 | 3  | 1 | 4  | 0 |
| Case 14 | 17 | 38,519,545 | 38,991,100 | 2  | 2 | 4  | 0 |
| Case 14 | 17 | 38,991,257 | 39,087,692 | 3  | 2 | 5  | 0 |
| Case 14 | 17 | 39,092,808 | 39,191,013 | 10 | 4 | 14 | 0 |
| Case 14 | 17 | 39,191,682 | 39,433,211 | 2  | 1 | 3  | 0 |
| Case 14 | 17 | 39,436,638 | 39,527,162 | 13 | 0 | 13 | 1 |
| Case 14 | 17 | 39,531,402 | 39,724,810 | 3  | 1 | 4  | 0 |
| Case 14 | 17 | 39,725,701 | 39,767,731 | 5  | 2 | 7  | 0 |
| Case 14 | 17 | 39,773,970 | 40,838,154 | 2  | 1 | 3  | 0 |
| Case 14 | 17 | 40,840,590 | 40,882,852 | 9  | 4 | 13 | 0 |
| Case 14 | 17 | 40,897,470 | 41,096,398 | 3  | 1 | 4  | 0 |
| Case 14 | 17 | 41,098,108 | 42,457,089 | 2  | 1 | 3  | 0 |
| Case 14 | 17 | 42,457,120 | 43,811,260 | 3  | 2 | 5  | 0 |
| Case 14 | 17 | 43,812,897 | 47,406,913 | 2  | 1 | 3  | 0 |
| Case 14 | 17 | 47,412,242 | 48,537,135 | 3  | 2 | 5  | 0 |
| Case 14 | 17 | 48,538,036 | 49,299,294 | 4  | 2 | 6  | 0 |
| Case 14 | 17 | 49,310,655 | 49,362,681 | 2  | 0 | 2  | 1 |
| Case 14 | 17 | 49,363,737 | 50,342,947 | 3  | 0 | 3  | 1 |
| Case 14 | 17 | 50,347,364 | 52,863,699 | 2  | 0 | 2  | 1 |
| Case 14 | 17 | 52,864,264 | 56,636,854 | 3  | 0 | 3  | 1 |
| Case 14 | 17 | 56,636,908 | 57,126,712 | 2  | 0 | 2  | 1 |
| Case 14 | 17 | 57,134,236 | 70,716,929 | 2  | 2 | 4  | 0 |
| Case 14 | 17 | 70,721,707 | 70,905,210 | 2  | 1 | 3  | 0 |
| Case 14 | 17 | 70,908,149 | 81,060,040 | 2  | 2 | 4  | 0 |
| Case 14 | 18 | 87,505     | 5,985,892  | 3  | 0 | 3  | 1 |
| Case 14 | 18 | 5,986,416  | 7,936,616  | 2  | 0 | 2  | 1 |
| Case 14 | 18 | 7,944,247  | 15,375,878 | 3  | 0 | 3  | 1 |
| Case 14 | 18 | 18,520,354 | 18,539,806 | 3  | 0 | 3  | 1 |
| Case 14 | 18 | 18,546,896 | 19,355,507 | 2  | 1 | 3  | 0 |
| Case 14 | 18 | 19,367,859 | 20,700,413 | 2  | 2 | 4  | 0 |
| Case 14 | 18 | 20,709,123 | 21,394,409 | 3  | 0 | 3  | 1 |
| Case 14 | 18 | 21,394,422 | 22,170,630 | 2  | 2 | 4  | 0 |
| Case 14 | 18 | 22,177,459 | 22,329,771 | 2  | 1 | 3  | 0 |
| Case 14 | 18 | 22,330,488 | 42,192,225 | 2  | 0 | 2  | 1 |
| Case 14 | 18 | 42,192,418 | 46,223,842 | 3  | 0 | 3  | 1 |
| Case 14 | 18 | 46,227,748 | 46,265,899 | 10 | 3 | 13 | 0 |
| Case 14 | 18 | 46,266,174 | 46,545,924 | 13 | 0 | 13 | 1 |
| Case 14 | 18 | 46,551,306 | 47,078,829 | 3  | 0 | 3  | 1 |
| Case 14 | 18 | 47,083,106 | 47,288,632 | 16 | 0 | 16 | 1 |
| Case 14 | 18 | 47,288,909 | 48,780,028 | 3  | 0 | 3  | 1 |
| Case 14 | 18 | 48,783,342 | 50,961,517 | 2  | 0 | 2  | 1 |
| Case 14 | 18 | 50,961,532 | 51,486,832 | 20 | 0 | 20 | 1 |
| Case 14 | 18 | 51,487,466 | 51,656,039 | 15 | 0 | 15 | 1 |
| Case 14 | 18 | 51,674,135 | 56,671,568 | 3  | 0 | 3  | 1 |
| Case 14 | 18 | 56,672,598 | 56,744,666 | 14 | 0 | 14 | 1 |
| Case 14 | 18 | 56,745,144 | 57,398,775 | 3  | 0 | 3  | 1 |
| Case 14 | 18 | 57,405,945 | 58,464,082 | 2  | 0 | 2  | 1 |
| Case 14 | 18 | 58,491,809 | 61,856,080 | 3  | 0 | 3  | 1 |
| Case 14 | 18 | 61,857,065 | 67,360,455 | 2  | 0 | 2  | 1 |
| Case 14 | 18 | 67,363,195 | 68,918,986 | 3  | 0 | 3  | 1 |



|         |    |             |             |   |   |   |   |
|---------|----|-------------|-------------|---|---|---|---|
| Case 14 | 18 | 68,925,031  | 71,467,900  | 2 | 0 | 2 | 1 |
| Case 14 | 18 | 71,469,025  | 72,943,863  | 3 | 0 | 3 | 1 |
| Case 14 | 18 | 72,944,256  | 73,267,883  | 3 | 2 | 5 | 0 |
| Case 14 | 18 | 73,268,262  | 78,015,180  | 3 | 0 | 3 | 1 |
| Case 14 | 19 | 260,912     | 24,629,285  | 2 | 1 | 3 | 0 |
| Case 14 | 19 | 27,732,159  | 59,097,160  | 2 | 1 | 3 | 0 |
| Case 14 | 20 | 63,244      | 14,665,605  | 3 | 2 | 5 | 0 |
| Case 14 | 20 | 14,668,243  | 15,259,803  | 3 | 1 | 4 | 0 |
| Case 14 | 20 | 15,260,732  | 26,293,985  | 3 | 2 | 5 | 0 |
| Case 14 | 20 | 29,425,357  | 62,948,788  | 3 | 2 | 5 | 0 |
| Case 14 | 21 | 10,827,533  | 10,971,337  | 2 | 0 | 2 | 1 |
| Case 14 | 21 | 14,368,320  | 32,155,783  | 2 | 0 | 2 | 1 |
| Case 14 | 21 | 32,169,175  | 48,100,155  | 2 | 1 | 3 | 0 |
| Case 14 | 22 | 16,114,244  | 19,188,971  | 3 | 0 | 3 | 1 |
| Case 14 | 22 | 19,195,680  | 51,195,728  | 3 | 1 | 4 | 0 |
| Case 14 | X  | 2,700,157   | 58,488,110  | 4 | 0 | 4 | 1 |
| Case 14 | X  | 61,694,576  | 90,971,456  | 4 | 0 | 4 | 1 |
| Case 14 | X  | 90,973,831  | 154,898,561 | 3 | 0 | 3 | 1 |
| Case 16 | 1  | 82,154      | 121,346,616 | 2 | 1 | 3 | 0 |
| Case 16 | 1  | 142,649,718 | 174,681,384 | 5 | 0 | 5 | 1 |
| Case 16 | 1  | 174,709,679 | 174,983,910 | 1 | 0 | 1 | 0 |
| Case 16 | 1  | 174,984,826 | 184,653,633 | 5 | 0 | 5 | 1 |
| Case 16 | 1  | 184,655,649 | 200,865,768 | 6 | 0 | 6 | 1 |
| Case 16 | 1  | 200,867,482 | 245,900,039 | 5 | 0 | 5 | 1 |
| Case 16 | 1  | 245,901,545 | 245,908,008 | 0 | 0 | 0 | 0 |
| Case 16 | 1  | 245,912,840 | 246,029,064 | 1 | 0 | 1 | 0 |
| Case 16 | 1  | 246,030,183 | 246,373,295 | 5 | 0 | 5 | 1 |
| Case 16 | 1  | 246,374,869 | 246,521,189 | 0 | 0 | 0 | 0 |
| Case 16 | 1  | 246,527,984 | 249,218,992 | 5 | 0 | 5 | 1 |
| Case 16 | 2  | 18,674      | 19,934,280  | 2 | 2 | 4 | 0 |
| Case 16 | 2  | 19,939,783  | 20,240,668  | 3 | 1 | 4 | 0 |
| Case 16 | 2  | 20,242,416  | 65,355,744  | 2 | 2 | 4 | 0 |
| Case 16 | 2  | 65,364,702  | 65,392,042  | 4 | 2 | 6 | 0 |
| Case 16 | 2  | 65,394,714  | 92,081,640  | 2 | 2 | 4 | 0 |
| Case 16 | 2  | 95,429,424  | 129,427,325 | 2 | 2 | 4 | 0 |
| Case 16 | 2  | 129,435,535 | 129,467,773 | 5 | 3 | 8 | 0 |
| Case 16 | 2  | 129,471,297 | 134,207,106 | 2 | 2 | 4 | 0 |
| Case 16 | 2  | 134,213,436 | 134,351,648 | 3 | 1 | 4 | 0 |
| Case 16 | 2  | 134,354,099 | 134,529,356 | 3 | 0 | 3 | 1 |
| Case 16 | 2  | 134,531,412 | 142,506,366 | 2 | 2 | 4 | 0 |
| Case 16 | 2  | 142,509,570 | 142,785,189 | 3 | 2 | 5 | 0 |
| Case 16 | 2  | 142,787,997 | 243,048,760 | 2 | 2 | 4 | 0 |
| Case 16 | 3  | 61,495      | 24,257,608  | 2 | 1 | 3 | 0 |
| Case 16 | 3  | 24,258,452  | 24,269,789  | 1 | 1 | 2 | 0 |
| Case 16 | 3  | 24,269,818  | 45,030,749  | 2 | 1 | 3 | 0 |
| Case 16 | 3  | 45,034,411  | 51,274,967  | 2 | 0 | 2 | 1 |
| Case 16 | 3  | 51,308,421  | 60,349,304  | 2 | 1 | 3 | 0 |
| Case 16 | 3  | 60,349,462  | 60,647,540  | 1 | 0 | 1 | 0 |
| Case 16 | 3  | 60,655,448  | 89,265,366  | 2 | 1 | 3 | 0 |
| Case 16 | 3  | 89,268,714  | 90,442,925  | 2 | 2 | 4 | 0 |
| Case 16 | 3  | 93,537,290  | 197,838,262 | 2 | 2 | 4 | 0 |
| Case 16 | 4  | 71,566      | 17,769,238  | 2 | 1 | 3 | 0 |
| Case 16 | 4  | 17,780,932  | 20,959,057  | 2 | 0 | 2 | 1 |
| Case 16 | 4  | 20,960,640  | 49,620,898  | 2 | 1 | 3 | 0 |
| Case 16 | 4  | 52,697,856  | 190,963,766 | 2 | 1 | 3 | 0 |
| Case 16 | 5  | 38,139      | 46,127,095  | 4 | 2 | 6 | 0 |
| Case 16 | 5  | 46,128,475  | 46,399,093  | 5 | 2 | 7 | 0 |
| Case 16 | 5  | 49,457,282  | 49,614,318  | 2 | 0 | 2 | 1 |
| Case 16 | 5  | 49,624,236  | 150,223,387 | 2 | 1 | 3 | 0 |
| Case 16 | 5  | 150,226,722 | 150,274,079 | 3 | 1 | 4 | 0 |
| Case 16 | 5  | 150,274,374 | 180,693,127 | 2 | 1 | 3 | 0 |

|         |   |             |             |    |   |    |   |
|---------|---|-------------|-------------|----|---|----|---|
| Case 16 | 6 | 108,666     | 1,583,600   | 2  | 2 | 4  | 0 |
| Case 16 | 6 | 1,584,384   | 1,935,155   | 2  | 1 | 3  | 0 |
| Case 16 | 6 | 1,942,538   | 2,139,450   | 1  | 0 | 1  | 0 |
| Case 16 | 6 | 2,145,136   | 29,445,495  | 2  | 2 | 4  | 0 |
| Case 16 | 6 | 29,446,632  | 29,550,618  | 4  | 2 | 6  | 0 |
| Case 16 | 6 | 29,551,861  | 31,271,757  | 2  | 2 | 4  | 0 |
| Case 16 | 6 | 31,272,157  | 31,351,764  | 2  | 1 | 3  | 0 |
| Case 16 | 6 | 31,352,113  | 58,752,089  | 2  | 2 | 4  | 0 |
| Case 16 | 6 | 61,891,118  | 70,001,186  | 2  | 2 | 4  | 0 |
| Case 16 | 6 | 70,003,389  | 150,067,675 | 2  | 1 | 3  | 0 |
| Case 16 | 6 | 150,071,059 | 150,303,241 | 1  | 1 | 2  | 0 |
| Case 16 | 6 | 150,303,401 | 170,980,171 | 2  | 1 | 3  | 0 |
| Case 16 | 7 | 44,935      | 6,773,892   | 5  | 1 | 6  | 0 |
| Case 16 | 7 | 6,779,270   | 8,125,989   | 6  | 1 | 7  | 0 |
| Case 16 | 7 | 8,127,710   | 9,104,184   | 5  | 1 | 6  | 0 |
| Case 16 | 7 | 9,104,637   | 10,796,892  | 6  | 1 | 7  | 0 |
| Case 16 | 7 | 10,804,070  | 11,711,073  | 5  | 1 | 6  | 0 |
| Case 16 | 7 | 11,725,406  | 13,982,420  | 6  | 1 | 7  | 0 |
| Case 16 | 7 | 13,990,992  | 14,534,248  | 5  | 1 | 6  | 0 |
| Case 16 | 7 | 14,537,224  | 20,120,813  | 6  | 1 | 7  | 0 |
| Case 16 | 7 | 20,123,880  | 58,019,061  | 5  | 1 | 6  | 0 |
| Case 16 | 7 | 61,056,053  | 61,994,170  | 5  | 1 | 6  | 0 |
| Case 16 | 7 | 62,035,570  | 63,385,883  | 3  | 2 | 5  | 0 |
| Case 16 | 7 | 63,387,484  | 73,724,910  | 3  | 3 | 6  | 0 |
| Case 16 | 7 | 73,728,109  | 73,886,570  | 9  | 4 | 13 | 0 |
| Case 16 | 7 | 73,889,810  | 78,473,591  | 3  | 3 | 6  | 0 |
| Case 16 | 7 | 78,474,408  | 78,801,465  | 24 | 0 | 24 | 1 |
| Case 16 | 7 | 78,808,948  | 78,974,072  | 21 | 1 | 22 | 0 |
| Case 16 | 7 | 78,978,645  | 79,339,063  | 16 | 1 | 17 | 0 |
| Case 16 | 7 | 79,341,676  | 80,307,224  | 21 | 0 | 21 | 1 |
| Case 16 | 7 | 80,341,163  | 80,812,398  | 17 | 1 | 18 | 0 |
| Case 16 | 7 | 80,812,792  | 81,195,596  | 15 | 1 | 16 | 0 |
| Case 16 | 7 | 81,207,444  | 82,665,830  | 9  | 2 | 11 | 0 |
| Case 16 | 7 | 82,673,172  | 83,571,278  | 13 | 1 | 14 | 0 |
| Case 16 | 7 | 83,578,842  | 84,101,774  | 12 | 2 | 14 | 0 |
| Case 16 | 7 | 84,104,060  | 85,571,719  | 6  | 2 | 8  | 0 |
| Case 16 | 7 | 85,572,941  | 86,264,311  | 22 | 0 | 22 | 1 |
| Case 16 | 7 | 86,284,433  | 86,986,421  | 16 | 1 | 17 | 0 |
| Case 16 | 7 | 86,986,971  | 88,324,856  | 11 | 2 | 13 | 0 |
| Case 16 | 7 | 88,325,106  | 90,057,918  | 8  | 2 | 10 | 0 |
| Case 16 | 7 | 90,068,856  | 93,349,015  | 9  | 2 | 11 | 0 |
| Case 16 | 7 | 93,350,257  | 94,274,361  | 11 | 1 | 12 | 0 |
| Case 16 | 7 | 94,281,335  | 95,822,413  | 7  | 2 | 9  | 0 |
| Case 16 | 7 | 95,835,862  | 95,986,043  | 11 | 2 | 13 | 0 |
| Case 16 | 7 | 95,996,206  | 96,946,643  | 16 | 0 | 16 | 1 |
| Case 16 | 7 | 96,950,914  | 97,499,082  | 18 | 0 | 18 | 1 |
| Case 16 | 7 | 97,502,737  | 99,630,948  | 14 | 0 | 14 | 1 |
| Case 16 | 7 | 99,631,342  | 157,485,165 | 3  | 0 | 3  | 1 |
| Case 16 | 7 | 157,487,013 | 157,605,815 | 1  | 0 | 1  | 0 |
| Case 16 | 7 | 157,625,051 | 159,119,486 | 3  | 0 | 3  | 1 |
| Case 16 | 8 | 164,984     | 5,719,971   | 2  | 1 | 3  | 0 |
| Case 16 | 8 | 5,723,448   | 5,754,333   | 1  | 0 | 1  | 0 |
| Case 16 | 8 | 5,755,611   | 43,791,691  | 2  | 1 | 3  | 0 |
| Case 16 | 8 | 46,886,735  | 47,173,274  | 2  | 1 | 3  | 0 |
| Case 16 | 8 | 47,178,209  | 47,727,697  | 1  | 1 | 2  | 0 |
| Case 16 | 8 | 47,732,328  | 69,895,021  | 2  | 1 | 3  | 0 |
| Case 16 | 8 | 69,900,903  | 141,554,959 | 2  | 2 | 4  | 0 |
| Case 16 | 8 | 141,555,862 | 141,675,931 | 2  | 0 | 2  | 1 |
| Case 16 | 8 | 141,677,324 | 144,484,673 | 2  | 2 | 4  | 0 |
| Case 16 | 8 | 144,494,963 | 146,293,414 | 2  | 1 | 3  | 0 |
| Case 16 | 9 | 46,587      | 20,963,374  | 1  | 1 | 2  | 0 |

|         |    |             |             |   |   |   |   |
|---------|----|-------------|-------------|---|---|---|---|
| Case 16 | 9  | 20,966,250  | 21,149,963  | 1 | 0 | 1 | 0 |
| Case 16 | 9  | 21,150,650  | 23,829,824  | 0 | 0 | 0 | 0 |
| Case 16 | 9  | 23,831,031  | 31,951,536  | 1 | 0 | 1 | 0 |
| Case 16 | 9  | 31,955,694  | 46,944,322  | 3 | 0 | 3 | 1 |
| Case 16 | 9  | 65,629,772  | 141,066,491 | 3 | 0 | 3 | 1 |
| Case 16 | 10 | 98,087      | 39,097,912  | 1 | 0 | 1 | 0 |
| Case 16 | 10 | 42,436,301  | 42,436,301  | 1 | 0 | 1 | 0 |
| Case 16 | 10 | 42,444,619  | 47,543,535  | 2 | 0 | 2 | 1 |
| Case 16 | 10 | 47,545,692  | 47,646,751  | 4 | 2 | 6 | 0 |
| Case 16 | 10 | 47,650,490  | 68,457,608  | 2 | 0 | 2 | 1 |
| Case 16 | 10 | 68,457,813  | 69,021,287  | 1 | 0 | 1 | 0 |
| Case 16 | 10 | 69,021,594  | 71,376,096  | 2 | 0 | 2 | 1 |
| Case 16 | 10 | 71,376,535  | 82,510,574  | 3 | 0 | 3 | 1 |
| Case 16 | 10 | 82,517,519  | 107,787,578 | 2 | 0 | 2 | 1 |
| Case 16 | 10 | 107,806,595 | 109,466,526 | 3 | 0 | 3 | 1 |
| Case 16 | 10 | 109,468,251 | 135,225,666 | 2 | 0 | 2 | 1 |
| Case 16 | 10 | 135,231,994 | 135,477,883 | 4 | 0 | 4 | 1 |
| Case 16 | 11 | 193,146     | 22,525,081  | 2 | 1 | 3 | 0 |
| Case 16 | 11 | 22,525,721  | 31,941,035  | 1 | 1 | 2 | 0 |
| Case 16 | 11 | 31,942,033  | 37,106,860  | 2 | 1 | 3 | 0 |
| Case 16 | 11 | 37,108,723  | 42,864,284  | 1 | 1 | 2 | 0 |
| Case 16 | 11 | 42,864,437  | 51,591,253  | 2 | 1 | 3 | 0 |
| Case 16 | 11 | 54,794,237  | 69,231,796  | 2 | 1 | 3 | 0 |
| Case 16 | 11 | 69,239,611  | 69,266,710  | 1 | 1 | 2 | 0 |
| Case 16 | 11 | 69,269,768  | 95,991,138  | 2 | 1 | 3 | 0 |
| Case 16 | 11 | 95,991,923  | 107,821,944 | 1 | 1 | 2 | 0 |
| Case 16 | 11 | 107,824,835 | 134,934,063 | 2 | 1 | 3 | 0 |
| Case 16 | 12 | 191,619     | 30,101,675  | 2 | 2 | 4 | 0 |
| Case 16 | 12 | 30,104,142  | 31,168,019  | 3 | 2 | 5 | 0 |
| Case 16 | 12 | 31,168,709  | 34,853,011  | 2 | 2 | 4 | 0 |
| Case 16 | 12 | 37,876,400  | 37,927,114  | 2 | 2 | 4 | 0 |
| Case 16 | 12 | 37,942,622  | 47,461,183  | 4 | 2 | 6 | 0 |
| Case 16 | 12 | 47,463,575  | 58,417,789  | 3 | 2 | 5 | 0 |
| Case 16 | 12 | 58,421,729  | 79,719,015  | 4 | 2 | 6 | 0 |
| Case 16 | 12 | 79,724,368  | 85,372,417  | 5 | 2 | 7 | 0 |
| Case 16 | 12 | 85,377,870  | 133,810,935 | 3 | 2 | 5 | 0 |
| Case 16 | 13 | 19,058,717  | 19,771,535  | 2 | 0 | 2 | 1 |
| Case 16 | 13 | 19,774,848  | 73,636,621  | 2 | 1 | 3 | 0 |
| Case 16 | 13 | 73,636,871  | 73,691,236  | 5 | 2 | 7 | 0 |
| Case 16 | 13 | 73,703,305  | 115,103,529 | 2 | 1 | 3 | 0 |
| Case 16 | 14 | 19,280,733  | 20,444,162  | 3 | 2 | 5 | 0 |
| Case 16 | 14 | 20,444,182  | 22,419,911  | 2 | 1 | 3 | 0 |
| Case 16 | 14 | 22,420,497  | 23,024,564  | 3 | 1 | 4 | 0 |
| Case 16 | 14 | 23,027,352  | 41,860,852  | 2 | 1 | 3 | 0 |
| Case 16 | 14 | 41,870,230  | 42,876,996  | 1 | 1 | 2 | 0 |
| Case 16 | 14 | 42,877,636  | 43,140,336  | 2 | 1 | 3 | 0 |
| Case 16 | 14 | 43,140,771  | 44,261,060  | 1 | 1 | 2 | 0 |
| Case 16 | 14 | 44,261,673  | 91,308,152  | 2 | 1 | 3 | 0 |
| Case 16 | 14 | 91,311,045  | 91,572,371  | 2 | 2 | 4 | 0 |
| Case 16 | 14 | 91,586,554  | 107,287,663 | 2 | 1 | 3 | 0 |
| Case 16 | 15 | 20,034,919  | 54,527,299  | 2 | 1 | 3 | 0 |
| Case 16 | 15 | 54,529,770  | 54,773,586  | 1 | 1 | 2 | 0 |
| Case 16 | 15 | 54,773,742  | 81,881,735  | 2 | 1 | 3 | 0 |
| Case 16 | 15 | 81,888,336  | 87,636,301  | 3 | 2 | 5 | 0 |
| Case 16 | 15 | 87,638,843  | 89,618,803  | 4 | 2 | 6 | 0 |
| Case 16 | 15 | 89,619,393  | 89,972,177  | 3 | 2 | 5 | 0 |
| Case 16 | 15 | 89,976,563  | 92,571,515  | 4 | 2 | 6 | 0 |
| Case 16 | 15 | 92,571,691  | 94,194,564  | 3 | 2 | 5 | 0 |
| Case 16 | 15 | 94,201,514  | 102,342,004 | 4 | 2 | 6 | 0 |
| Case 16 | 15 | 102,344,571 | 102,461,162 | 3 | 2 | 5 | 0 |
| Case 16 | 16 | 88,165      | 3,852,776   | 2 | 2 | 4 | 0 |

|         |    |             |             |    |   |    |   |
|---------|----|-------------|-------------|----|---|----|---|
| Case 16 | 16 | 3,860,640   | 4,164,920   | 2  | 1 | 3  | 0 |
| Case 16 | 16 | 4,165,032   | 6,792,188   | 2  | 2 | 4  | 0 |
| Case 16 | 16 | 6,796,804   | 6,891,681   | 3  | 2 | 5  | 0 |
| Case 16 | 16 | 6,892,619   | 32,257,633  | 2  | 2 | 4  | 0 |
| Case 16 | 16 | 32,392,598  | 35,285,582  | 3  | 0 | 3  | 1 |
| Case 16 | 16 | 46,450,037  | 68,395,161  | 3  | 0 | 3  | 1 |
| Case 16 | 16 | 68,396,034  | 68,810,923  | 1  | 0 | 1  | 0 |
| Case 16 | 16 | 68,814,826  | 78,096,632  | 3  | 0 | 3  | 1 |
| Case 16 | 16 | 78,101,336  | 78,648,998  | 2  | 0 | 2  | 1 |
| Case 16 | 16 | 78,656,489  | 90,274,695  | 3  | 0 | 3  | 1 |
| Case 16 | 17 | 11,885      | 931,002     | 2  | 1 | 3  | 0 |
| Case 16 | 17 | 936,300     | 970,413     | 4  | 1 | 5  | 0 |
| Case 16 | 17 | 970,737     | 22,242,355  | 2  | 1 | 3  | 0 |
| Case 16 | 17 | 25,268,142  | 81,060,040  | 2  | 1 | 3  | 0 |
| Case 16 | 18 | 87,505      | 15,375,878  | 2  | 0 | 2  | 1 |
| Case 16 | 18 | 18,520,354  | 78,015,180  | 2  | 0 | 2  | 1 |
| Case 16 | 19 | 260,912     | 24,629,285  | 2  | 1 | 3  | 0 |
| Case 16 | 19 | 27,732,159  | 59,097,160  | 2  | 1 | 3  | 0 |
| Case 16 | 20 | 63,244      | 14,526,164  | 2  | 2 | 4  | 0 |
| Case 16 | 20 | 14,530,220  | 14,840,502  | 2  | 1 | 3  | 0 |
| Case 16 | 20 | 14,842,386  | 26,293,985  | 2  | 2 | 4  | 0 |
| Case 16 | 20 | 29,425,357  | 44,955,649  | 2  | 2 | 4  | 0 |
| Case 16 | 20 | 44,955,888  | 51,741,616  | 3  | 2 | 5  | 0 |
| Case 16 | 20 | 51,744,157  | 52,045,306  | 13 | 0 | 13 | 1 |
| Case 16 | 20 | 52,050,765  | 52,425,620  | 16 | 0 | 16 | 1 |
| Case 16 | 20 | 52,427,319  | 52,660,741  | 15 | 0 | 15 | 1 |
| Case 16 | 20 | 52,663,409  | 52,944,580  | 3  | 2 | 5  | 0 |
| Case 16 | 20 | 52,948,117  | 53,387,775  | 11 | 5 | 16 | 0 |
| Case 16 | 20 | 53,393,214  | 53,936,950  | 3  | 2 | 5  | 0 |
| Case 16 | 20 | 53,939,607  | 54,813,533  | 15 | 0 | 15 | 1 |
| Case 16 | 20 | 54,817,822  | 55,830,151  | 3  | 2 | 5  | 0 |
| Case 16 | 20 | 55,871,840  | 56,577,581  | 5  | 1 | 6  | 0 |
| Case 16 | 20 | 56,579,137  | 57,853,958  | 15 | 0 | 15 | 1 |
| Case 16 | 20 | 57,854,010  | 58,047,477  | 10 | 0 | 10 | 1 |
| Case 16 | 20 | 58,047,917  | 61,453,946  | 14 | 0 | 14 | 1 |
| Case 16 | 20 | 61,458,135  | 62,948,788  | 2  | 0 | 2  | 1 |
| Case 16 | 21 | 10,827,533  | 10,971,337  | 2  | 1 | 3  | 0 |
| Case 16 | 21 | 14,368,320  | 35,313,582  | 2  | 1 | 3  | 0 |
| Case 16 | 21 | 35,314,725  | 35,359,935  | 1  | 0 | 1  | 0 |
| Case 16 | 21 | 35,360,291  | 36,171,613  | 2  | 1 | 3  | 0 |
| Case 16 | 21 | 36,172,283  | 36,462,734  | 1  | 0 | 1  | 0 |
| Case 16 | 21 | 36,463,296  | 48,100,155  | 2  | 1 | 3  | 0 |
| Case 16 | 22 | 16,114,244  | 25,905,668  | 2  | 0 | 2  | 1 |
| Case 16 | 22 | 25,908,441  | 28,244,191  | 3  | 0 | 3  | 1 |
| Case 16 | 22 | 28,248,840  | 51,195,728  | 2  | 0 | 2  | 1 |
| Case 16 | X  | 2,700,157   | 58,488,110  | 1  | 0 | 1  | 0 |
| Case 16 | X  | 61,694,576  | 154,898,561 | 1  | 0 | 1  | 0 |
| Case 25 | 1  | 82,154      | 40,462,662  | 2  | 1 | 3  | 0 |
| Case 25 | 1  | 40,499,302  | 41,399,738  | 2  | 2 | 4  | 0 |
| Case 25 | 1  | 41,402,143  | 92,733,546  | 2  | 1 | 3  | 0 |
| Case 25 | 1  | 92,733,663  | 94,574,780  | 2  | 2 | 4  | 0 |
| Case 25 | 1  | 94,575,043  | 111,607,219 | 2  | 1 | 3  | 0 |
| Case 25 | 1  | 111,610,738 | 112,788,376 | 3  | 1 | 4  | 0 |
| Case 25 | 1  | 112,788,660 | 118,862,669 | 2  | 1 | 3  | 0 |
| Case 25 | 1  | 118,863,787 | 121,346,616 | 3  | 2 | 5  | 0 |
| Case 25 | 1  | 142,649,718 | 144,894,611 | 3  | 2 | 5  | 0 |
| Case 25 | 1  | 144,894,697 | 154,698,817 | 4  | 1 | 5  | 0 |
| Case 25 | 1  | 154,700,649 | 154,764,715 | 5  | 1 | 6  | 0 |
| Case 25 | 1  | 154,766,100 | 249,218,992 | 4  | 1 | 5  | 0 |
| Case 25 | 2  | 18,674      | 29,654,953  | 5  | 0 | 5  | 1 |
| Case 25 | 2  | 29,666,976  | 29,702,883  | 6  | 0 | 6  | 1 |

|         |   |             |             |   |   |   |   |
|---------|---|-------------|-------------|---|---|---|---|
| Case 25 | 2 | 29,704,715  | 56,544,492  | 5 | 0 | 5 | 1 |
| Case 25 | 2 | 56,552,703  | 57,842,453  | 5 | 1 | 6 | 0 |
| Case 25 | 2 | 57,845,016  | 57,965,893  | 5 | 0 | 5 | 1 |
| Case 25 | 2 | 57,970,943  | 58,481,589  | 5 | 1 | 6 | 0 |
| Case 25 | 2 | 58,487,267  | 66,423,991  | 5 | 0 | 5 | 1 |
| Case 25 | 2 | 66,430,063  | 75,803,049  | 4 | 0 | 4 | 1 |
| Case 25 | 2 | 75,804,641  | 83,932,640  | 3 | 0 | 3 | 1 |
| Case 25 | 2 | 83,947,833  | 87,046,014  | 4 | 0 | 4 | 1 |
| Case 25 | 2 | 87,048,630  | 92,081,640  | 5 | 0 | 5 | 1 |
| Case 25 | 2 | 95,429,424  | 95,685,408  | 6 | 2 | 8 | 0 |
| Case 25 | 2 | 95,687,104  | 105,012,664 | 5 | 2 | 7 | 0 |
| Case 25 | 2 | 105,012,855 | 105,291,019 | 4 | 2 | 6 | 0 |
| Case 25 | 2 | 105,296,110 | 105,540,676 | 5 | 2 | 7 | 0 |
| Case 25 | 2 | 105,544,888 | 110,977,357 | 4 | 2 | 6 | 0 |
| Case 25 | 2 | 110,980,346 | 120,288,038 | 4 | 1 | 5 | 0 |
| Case 25 | 2 | 120,293,582 | 121,164,027 | 5 | 1 | 6 | 0 |
| Case 25 | 2 | 121,171,678 | 131,349,899 | 4 | 1 | 5 | 0 |
| Case 25 | 2 | 131,480,411 | 145,585,009 | 4 | 0 | 4 | 1 |
| Case 25 | 2 | 145,588,358 | 186,661,602 | 4 | 1 | 5 | 0 |
| Case 25 | 2 | 186,664,825 | 186,817,136 | 2 | 1 | 3 | 0 |
| Case 25 | 2 | 186,844,579 | 208,687,885 | 4 | 1 | 5 | 0 |
| Case 25 | 2 | 208,690,281 | 219,784,854 | 4 | 0 | 4 | 1 |
| Case 25 | 2 | 219,816,468 | 224,679,435 | 5 | 0 | 5 | 1 |
| Case 25 | 2 | 224,693,416 | 224,824,484 | 4 | 0 | 4 | 1 |
| Case 25 | 2 | 224,824,567 | 226,299,309 | 5 | 0 | 5 | 1 |
| Case 25 | 2 | 226,308,019 | 228,336,315 | 4 | 1 | 5 | 0 |
| Case 25 | 2 | 228,343,348 | 228,671,423 | 4 | 0 | 4 | 1 |
| Case 25 | 2 | 228,672,579 | 239,008,067 | 4 | 1 | 5 | 0 |
| Case 25 | 2 | 239,008,203 | 243,048,760 | 5 | 1 | 6 | 0 |
| Case 25 | 3 | 61,495      | 7,883,440   | 3 | 0 | 3 | 1 |
| Case 25 | 3 | 7,889,657   | 17,989,553  | 4 | 0 | 4 | 1 |
| Case 25 | 3 | 17,995,710  | 22,841,826  | 3 | 0 | 3 | 1 |
| Case 25 | 3 | 22,858,824  | 34,519,341  | 4 | 0 | 4 | 1 |
| Case 25 | 3 | 34,532,947  | 36,073,516  | 3 | 0 | 3 | 1 |
| Case 25 | 3 | 36,073,790  | 46,724,569  | 4 | 0 | 4 | 1 |
| Case 25 | 3 | 46,724,654  | 48,287,879  | 3 | 0 | 3 | 1 |
| Case 25 | 3 | 48,297,560  | 60,164,829  | 4 | 0 | 4 | 1 |
| Case 25 | 3 | 60,167,219  | 60,423,009  | 0 | 0 | 0 | 0 |
| Case 25 | 3 | 60,434,122  | 75,379,085  | 4 | 0 | 4 | 1 |
| Case 25 | 3 | 75,381,599  | 88,287,719  | 3 | 0 | 3 | 1 |
| Case 25 | 3 | 88,296,807  | 90,442,925  | 3 | 2 | 5 | 0 |
| Case 25 | 3 | 93,537,290  | 93,537,290  | 3 | 2 | 5 | 0 |
| Case 25 | 3 | 93,545,404  | 95,600,730  | 4 | 2 | 6 | 0 |
| Case 25 | 3 | 95,617,191  | 97,105,552  | 5 | 2 | 7 | 0 |
| Case 25 | 3 | 97,140,890  | 123,444,811 | 2 | 2 | 4 | 0 |
| Case 25 | 3 | 123,451,743 | 124,705,111 | 4 | 2 | 6 | 0 |
| Case 25 | 3 | 124,715,526 | 174,860,501 | 2 | 2 | 4 | 0 |
| Case 25 | 3 | 174,860,654 | 174,962,279 | 1 | 0 | 1 | 0 |
| Case 25 | 3 | 174,966,522 | 175,081,967 | 2 | 2 | 4 | 0 |
| Case 25 | 3 | 175,082,324 | 175,182,072 | 2 | 1 | 3 | 0 |
| Case 25 | 3 | 175,185,060 | 192,291,867 | 2 | 2 | 4 | 0 |
| Case 25 | 3 | 192,293,753 | 193,121,323 | 3 | 2 | 5 | 0 |
| Case 25 | 3 | 193,121,928 | 197,838,262 | 2 | 2 | 4 | 0 |
| Case 25 | 4 | 71,566      | 5,128,511   | 2 | 2 | 4 | 0 |
| Case 25 | 4 | 5,128,641   | 21,565,822  | 2 | 1 | 3 | 0 |
| Case 25 | 4 | 21,566,178  | 27,219,736  | 3 | 1 | 4 | 0 |
| Case 25 | 4 | 27,219,806  | 49,620,898  | 2 | 1 | 3 | 0 |
| Case 25 | 4 | 52,697,856  | 121,396,721 | 2 | 1 | 3 | 0 |
| Case 25 | 4 | 121,397,402 | 145,623,107 | 2 | 2 | 4 | 0 |
| Case 25 | 4 | 145,625,730 | 146,002,881 | 2 | 1 | 3 | 0 |
| Case 25 | 4 | 146,017,185 | 171,544,366 | 2 | 2 | 4 | 0 |

|         |   |             |             |    |   |    |   |
|---------|---|-------------|-------------|----|---|----|---|
| Case 25 | 4 | 171,576,294 | 172,999,916 | 3  | 2 | 5  | 0 |
| Case 25 | 4 | 173,001,831 | 173,541,374 | 5  | 2 | 7  | 0 |
| Case 25 | 4 | 173,543,874 | 174,392,507 | 3  | 2 | 5  | 0 |
| Case 25 | 4 | 174,398,324 | 174,459,823 | 3  | 0 | 3  | 1 |
| Case 25 | 4 | 174,461,343 | 181,923,958 | 2  | 0 | 2  | 1 |
| Case 25 | 4 | 181,925,065 | 188,079,777 | 3  | 0 | 3  | 1 |
| Case 25 | 4 | 188,080,985 | 190,963,766 | 2  | 0 | 2  | 1 |
| Case 25 | 5 | 38,139      | 46,117,770  | 5  | 2 | 7  | 0 |
| Case 25 | 5 | 46,127,095  | 46,399,093  | 4  | 1 | 5  | 0 |
| Case 25 | 5 | 49,457,282  | 59,152,509  | 2  | 2 | 4  | 0 |
| Case 25 | 5 | 59,165,423  | 59,336,110  | 2  | 1 | 3  | 0 |
| Case 25 | 5 | 59,360,341  | 92,969,334  | 2  | 2 | 4  | 0 |
| Case 25 | 5 | 92,980,916  | 93,699,232  | 2  | 1 | 3  | 0 |
| Case 25 | 5 | 93,699,673  | 162,318,689 | 2  | 2 | 4  | 0 |
| Case 25 | 5 | 162,320,221 | 180,693,127 | 2  | 1 | 3  | 0 |
| Case 25 | 6 | 108,666     | 1,863,854   | 3  | 2 | 5  | 0 |
| Case 25 | 6 | 1,866,779   | 2,431,429   | 2  | 2 | 4  | 0 |
| Case 25 | 6 | 2,437,996   | 17,837,734  | 3  | 2 | 5  | 0 |
| Case 25 | 6 | 17,847,860  | 25,374,754  | 4  | 3 | 7  | 0 |
| Case 25 | 6 | 25,379,926  | 58,752,089  | 3  | 2 | 5  | 0 |
| Case 25 | 6 | 61,891,118  | 65,577,402  | 3  | 2 | 5  | 0 |
| Case 25 | 6 | 65,578,285  | 135,468,891 | 2  | 2 | 4  | 0 |
| Case 25 | 6 | 135,482,566 | 135,617,601 | 4  | 2 | 6  | 0 |
| Case 25 | 6 | 135,619,996 | 150,897,232 | 2  | 2 | 4  | 0 |
| Case 25 | 6 | 150,900,125 | 151,110,620 | 2  | 1 | 3  | 0 |
| Case 25 | 6 | 151,112,333 | 162,633,271 | 2  | 2 | 4  | 0 |
| Case 25 | 6 | 162,633,618 | 162,803,645 | 2  | 1 | 3  | 0 |
| Case 25 | 6 | 162,804,504 | 170,980,171 | 2  | 2 | 4  | 0 |
| Case 25 | 7 | 44,935      | 83,185      | 6  | 2 | 8  | 0 |
| Case 25 | 7 | 93,811      | 7,169,596   | 4  | 3 | 7  | 0 |
| Case 25 | 7 | 7,170,481   | 20,666,750  | 4  | 4 | 8  | 0 |
| Case 25 | 7 | 20,668,403  | 38,297,145  | 4  | 3 | 7  | 0 |
| Case 25 | 7 | 38,298,285  | 38,363,748  | 5  | 4 | 9  | 0 |
| Case 25 | 7 | 38,363,929  | 55,968,447  | 4  | 3 | 7  | 0 |
| Case 25 | 7 | 55,975,311  | 58,019,061  | 3  | 3 | 6  | 0 |
| Case 25 | 7 | 61,056,053  | 62,074,781  | 3  | 3 | 6  | 0 |
| Case 25 | 7 | 62,113,011  | 80,048,871  | 5  | 0 | 5  | 1 |
| Case 25 | 7 | 80,051,323  | 80,100,969  | 5  | 2 | 7  | 0 |
| Case 25 | 7 | 80,101,743  | 80,407,703  | 4  | 4 | 8  | 0 |
| Case 25 | 7 | 80,407,801  | 80,478,992  | 6  | 1 | 7  | 0 |
| Case 25 | 7 | 80,479,894  | 88,945,484  | 5  | 0 | 5  | 1 |
| Case 25 | 7 | 88,946,197  | 94,368,896  | 4  | 0 | 4  | 1 |
| Case 25 | 7 | 94,375,808  | 107,109,057 | 5  | 0 | 5  | 1 |
| Case 25 | 7 | 107,112,726 | 107,893,220 | 6  | 0 | 6  | 1 |
| Case 25 | 7 | 107,898,586 | 110,931,475 | 7  | 0 | 7  | 1 |
| Case 25 | 7 | 110,932,630 | 113,863,384 | 8  | 0 | 8  | 1 |
| Case 25 | 7 | 113,898,450 | 114,421,923 | 6  | 0 | 6  | 1 |
| Case 25 | 7 | 114,425,799 | 115,082,872 | 7  | 0 | 7  | 1 |
| Case 25 | 7 | 115,089,527 | 115,795,139 | 10 | 0 | 10 | 1 |
| Case 25 | 7 | 115,796,254 | 117,739,400 | 17 | 0 | 17 | 1 |
| Case 25 | 7 | 117,744,660 | 118,636,817 | 11 | 0 | 11 | 1 |
| Case 25 | 7 | 118,645,137 | 119,809,612 | 7  | 0 | 7  | 1 |
| Case 25 | 7 | 119,813,869 | 159,119,486 | 4  | 0 | 4  | 1 |
| Case 25 | 8 | 164,984     | 30,108,170  | 3  | 1 | 4  | 0 |
| Case 25 | 8 | 30,112,318  | 32,428,968  | 2  | 1 | 3  | 0 |
| Case 25 | 8 | 32,436,875  | 36,530,894  | 3  | 1 | 4  | 0 |
| Case 25 | 8 | 36,544,439  | 43,414,155  | 4  | 1 | 5  | 0 |
| Case 25 | 8 | 43,447,235  | 43,791,691  | 3  | 0 | 3  | 1 |
| Case 25 | 8 | 46,886,735  | 46,886,735  | 3  | 0 | 3  | 1 |
| Case 25 | 8 | 46,942,842  | 85,683,502  | 8  | 1 | 9  | 0 |
| Case 25 | 8 | 85,686,889  | 96,804,065  | 7  | 1 | 8  | 0 |

|         |    |             |             |    |   |    |   |
|---------|----|-------------|-------------|----|---|----|---|
| Case 25 | 8  | 96,804,762  | 104,181,000 | 6  | 2 | 8  | 0 |
| Case 25 | 8  | 104,182,696 | 119,403,784 | 7  | 2 | 9  | 0 |
| Case 25 | 8  | 119,405,522 | 119,480,896 | 7  | 1 | 8  | 0 |
| Case 25 | 8  | 119,486,034 | 133,031,047 | 7  | 2 | 9  | 0 |
| Case 25 | 8  | 133,033,089 | 136,811,545 | 6  | 2 | 8  | 0 |
| Case 25 | 8  | 136,812,571 | 138,844,863 | 7  | 2 | 9  | 0 |
| Case 25 | 8  | 138,846,091 | 146,293,414 | 6  | 2 | 8  | 0 |
| Case 25 | 9  | 46,587      | 8,206,576   | 3  | 0 | 3  | 1 |
| Case 25 | 9  | 8,206,769   | 12,818,455  | 2  | 0 | 2  | 1 |
| Case 25 | 9  | 12,818,692  | 20,428,137  | 3  | 0 | 3  | 1 |
| Case 25 | 9  | 20,430,468  | 26,905,703  | 2  | 0 | 2  | 1 |
| Case 25 | 9  | 26,907,931  | 27,882,653  | 3  | 2 | 5  | 0 |
| Case 25 | 9  | 27,885,011  | 28,458,823  | 8  | 1 | 9  | 0 |
| Case 25 | 9  | 28,463,701  | 29,636,965  | 5  | 2 | 7  | 0 |
| Case 25 | 9  | 29,639,093  | 36,693,098  | 2  | 2 | 4  | 0 |
| Case 25 | 9  | 36,697,735  | 37,692,711  | 7  | 1 | 8  | 0 |
| Case 25 | 9  | 37,692,733  | 37,974,811  | 5  | 2 | 7  | 0 |
| Case 25 | 9  | 37,990,801  | 38,769,003  | 3  | 2 | 5  | 0 |
| Case 25 | 9  | 38,770,134  | 46,944,322  | 2  | 1 | 3  | 0 |
| Case 25 | 9  | 65,629,772  | 71,058,191  | 3  | 2 | 5  | 0 |
| Case 25 | 9  | 71,066,165  | 104,433,347 | 2  | 2 | 4  | 0 |
| Case 25 | 9  | 104,437,373 | 107,569,337 | 2  | 1 | 3  | 0 |
| Case 25 | 9  | 107,570,714 | 125,253,682 | 2  | 2 | 4  | 0 |
| Case 25 | 9  | 125,254,955 | 125,265,496 | 2  | 1 | 3  | 0 |
| Case 25 | 9  | 125,266,798 | 127,781,208 | 2  | 2 | 4  | 0 |
| Case 25 | 9  | 127,781,259 | 128,064,673 | 2  | 1 | 3  | 0 |
| Case 25 | 9  | 128,064,926 | 141,066,491 | 2  | 2 | 4  | 0 |
| Case 25 | 10 | 98,087      | 32,080,912  | 5  | 0 | 5  | 1 |
| Case 25 | 10 | 32,081,924  | 32,161,486  | 7  | 0 | 7  | 1 |
| Case 25 | 10 | 32,167,385  | 33,018,261  | 9  | 0 | 9  | 1 |
| Case 25 | 10 | 33,042,613  | 33,451,379  | 11 | 0 | 11 | 1 |
| Case 25 | 10 | 33,454,715  | 39,097,912  | 5  | 0 | 5  | 1 |
| Case 25 | 10 | 42,436,301  | 42,436,301  | 5  | 0 | 5  | 1 |
| Case 25 | 10 | 42,444,619  | 45,282,703  | 6  | 0 | 6  | 1 |
| Case 25 | 10 | 45,300,460  | 48,366,054  | 5  | 0 | 5  | 1 |
| Case 25 | 10 | 48,367,121  | 48,593,635  | 4  | 0 | 4  | 1 |
| Case 25 | 10 | 48,603,866  | 50,388,598  | 6  | 0 | 6  | 1 |
| Case 25 | 10 | 50,393,013  | 52,617,538  | 4  | 0 | 4  | 1 |
| Case 25 | 10 | 52,623,433  | 53,317,506  | 3  | 0 | 3  | 1 |
| Case 25 | 10 | 53,317,666  | 55,081,279  | 6  | 0 | 6  | 1 |
| Case 25 | 10 | 55,093,531  | 58,342,829  | 5  | 0 | 5  | 1 |
| Case 25 | 10 | 58,343,819  | 63,350,295  | 6  | 0 | 6  | 1 |
| Case 25 | 10 | 63,352,842  | 66,734,414  | 7  | 0 | 7  | 1 |
| Case 25 | 10 | 66,741,449  | 71,060,610  | 3  | 0 | 3  | 1 |
| Case 25 | 10 | 71,064,512  | 73,975,593  | 4  | 0 | 4  | 1 |
| Case 25 | 10 | 73,988,264  | 78,670,661  | 3  | 0 | 3  | 1 |
| Case 25 | 10 | 78,671,776  | 82,472,563  | 4  | 0 | 4  | 1 |
| Case 25 | 10 | 82,473,065  | 87,348,040  | 3  | 0 | 3  | 1 |
| Case 25 | 10 | 87,357,738  | 88,162,682  | 4  | 0 | 4  | 1 |
| Case 25 | 10 | 88,163,251  | 105,043,289 | 3  | 0 | 3  | 1 |
| Case 25 | 10 | 105,044,157 | 105,154,890 | 2  | 0 | 2  | 1 |
| Case 25 | 10 | 105,155,066 | 110,428,405 | 3  | 0 | 3  | 1 |
| Case 25 | 10 | 110,435,038 | 118,770,693 | 6  | 0 | 6  | 1 |
| Case 25 | 10 | 118,774,195 | 119,102,636 | 7  | 0 | 7  | 1 |
| Case 25 | 10 | 119,103,471 | 120,448,570 | 6  | 0 | 6  | 1 |
| Case 25 | 10 | 120,453,168 | 132,897,429 | 4  | 0 | 4  | 1 |
| Case 25 | 10 | 132,901,331 | 133,154,069 | 5  | 0 | 5  | 1 |
| Case 25 | 10 | 133,154,905 | 133,206,629 | 6  | 0 | 6  | 1 |
| Case 25 | 10 | 133,212,223 | 135,477,883 | 4  | 0 | 4  | 1 |
| Case 25 | 11 | 193,146     | 13,276,329  | 2  | 1 | 3  | 0 |
| Case 25 | 11 | 13,278,027  | 50,296,502  | 2  | 2 | 4  | 0 |

|         |    |             |             |    |   |    |   |
|---------|----|-------------|-------------|----|---|----|---|
| Case 25 | 11 | 50,325,741  | 50,551,954  | 2  | 1 | 3  | 0 |
| Case 25 | 11 | 50,566,719  | 51,379,204  | 1  | 0 | 1  | 0 |
| Case 25 | 11 | 51,383,999  | 51,591,253  | 2  | 1 | 3  | 0 |
| Case 25 | 11 | 54,794,237  | 66,700,508  | 2  | 1 | 3  | 0 |
| Case 25 | 11 | 66,721,028  | 70,572,020  | 7  | 0 | 7  | 1 |
| Case 25 | 11 | 70,573,926  | 71,498,902  | 7  | 1 | 8  | 0 |
| Case 25 | 11 | 71,507,133  | 78,040,961  | 5  | 1 | 6  | 0 |
| Case 25 | 11 | 78,054,336  | 107,134,499 | 6  | 1 | 7  | 0 |
| Case 25 | 11 | 107,135,449 | 107,159,302 | 2  | 0 | 2  | 1 |
| Case 25 | 11 | 107,167,486 | 110,706,265 | 1  | 0 | 1  | 0 |
| Case 25 | 11 | 110,707,133 | 110,836,948 | 2  | 0 | 2  | 1 |
| Case 25 | 11 | 110,839,870 | 111,140,462 | 1  | 0 | 1  | 0 |
| Case 25 | 11 | 111,141,676 | 112,348,123 | 2  | 0 | 2  | 1 |
| Case 25 | 11 | 112,359,962 | 113,065,293 | 1  | 0 | 1  | 0 |
| Case 25 | 11 | 113,069,950 | 113,411,628 | 2  | 0 | 2  | 1 |
| Case 25 | 11 | 113,413,565 | 113,913,651 | 1  | 0 | 1  | 0 |
| Case 25 | 11 | 113,925,266 | 114,128,967 | 2  | 0 | 2  | 1 |
| Case 25 | 11 | 114,129,057 | 114,175,276 | 1  | 0 | 1  | 0 |
| Case 25 | 11 | 114,177,853 | 115,262,036 | 2  | 0 | 2  | 1 |
| Case 25 | 11 | 115,268,121 | 122,376,492 | 4  | 1 | 5  | 0 |
| Case 25 | 11 | 122,382,426 | 130,440,804 | 5  | 1 | 6  | 0 |
| Case 25 | 11 | 130,445,239 | 130,769,033 | 2  | 0 | 2  | 1 |
| Case 25 | 11 | 130,771,662 | 130,800,330 | 2  | 1 | 3  | 0 |
| Case 25 | 11 | 130,801,649 | 130,890,970 | 1  | 0 | 1  | 0 |
| Case 25 | 11 | 130,891,895 | 134,934,063 | 2  | 0 | 2  | 1 |
| Case 25 | 12 | 191,619     | 9,899,575   | 3  | 2 | 5  | 0 |
| Case 25 | 12 | 9,904,352   | 10,202,639  | 21 | 0 | 21 | 1 |
| Case 25 | 12 | 10,205,332  | 10,403,650  | 16 | 0 | 16 | 1 |
| Case 25 | 12 | 10,410,360  | 10,698,255  | 23 | 0 | 23 | 1 |
| Case 25 | 12 | 10,701,992  | 11,603,858  | 17 | 0 | 17 | 1 |
| Case 25 | 12 | 11,608,776  | 11,810,846  | 19 | 0 | 19 | 1 |
| Case 25 | 12 | 11,812,330  | 11,992,106  | 15 | 0 | 15 | 1 |
| Case 25 | 12 | 11,992,168  | 12,195,292  | 14 | 0 | 14 | 1 |
| Case 25 | 12 | 12,202,173  | 21,761,315  | 3  | 2 | 5  | 0 |
| Case 25 | 12 | 21,780,851  | 23,230,156  | 5  | 2 | 7  | 0 |
| Case 25 | 12 | 23,238,664  | 26,513,100  | 3  | 2 | 5  | 0 |
| Case 25 | 12 | 26,515,156  | 34,853,011  | 2  | 1 | 3  | 0 |
| Case 25 | 12 | 37,876,400  | 38,155,198  | 2  | 1 | 3  | 0 |
| Case 25 | 12 | 38,187,236  | 38,432,009  | 4  | 0 | 4  | 1 |
| Case 25 | 12 | 38,446,861  | 50,241,013  | 5  | 0 | 5  | 1 |
| Case 25 | 12 | 50,245,706  | 50,290,023  | 6  | 0 | 6  | 1 |
| Case 25 | 12 | 50,290,554  | 53,819,467  | 5  | 0 | 5  | 1 |
| Case 25 | 12 | 53,822,670  | 58,347,442  | 7  | 0 | 7  | 1 |
| Case 25 | 12 | 58,350,479  | 59,316,881  | 8  | 0 | 8  | 1 |
| Case 25 | 12 | 59,322,352  | 63,019,450  | 9  | 0 | 9  | 1 |
| Case 25 | 12 | 63,020,745  | 71,158,516  | 8  | 0 | 8  | 1 |
| Case 25 | 12 | 71,167,528  | 72,039,421  | 11 | 0 | 11 | 1 |
| Case 25 | 12 | 72,050,842  | 81,736,339  | 3  | 0 | 3  | 1 |
| Case 25 | 12 | 81,741,409  | 99,205,826  | 5  | 0 | 5  | 1 |
| Case 25 | 12 | 99,208,993  | 118,060,777 | 4  | 0 | 4  | 1 |
| Case 25 | 12 | 118,075,236 | 123,276,606 | 6  | 0 | 6  | 1 |
| Case 25 | 12 | 123,280,470 | 127,329,530 | 4  | 0 | 4  | 1 |
| Case 25 | 12 | 127,335,152 | 127,785,576 | 6  | 0 | 6  | 1 |
| Case 25 | 12 | 127,789,406 | 127,925,670 | 9  | 0 | 9  | 1 |
| Case 25 | 12 | 127,926,728 | 131,069,814 | 4  | 0 | 4  | 1 |
| Case 25 | 12 | 131,072,461 | 133,277,860 | 5  | 0 | 5  | 1 |
| Case 25 | 12 | 133,277,870 | 133,810,935 | 4  | 0 | 4  | 1 |
| Case 25 | 13 | 19,058,717  | 23,380,632  | 2  | 2 | 4  | 0 |
| Case 25 | 13 | 23,382,022  | 23,408,043  | 2  | 1 | 3  | 0 |
| Case 25 | 13 | 23,416,203  | 26,232,290  | 2  | 2 | 4  | 0 |
| Case 25 | 13 | 26,236,041  | 67,784,330  | 4  | 2 | 6  | 0 |



|         |    |            |             |    |   |    |   |
|---------|----|------------|-------------|----|---|----|---|
| Case 25 | 13 | 67,798,250 | 81,712,872  | 4  | 3 | 7  | 0 |
| Case 25 | 13 | 81,716,268 | 115,103,529 | 4  | 2 | 6  | 0 |
| Case 25 | 14 | 19,280,733 | 22,377,212  | 5  | 0 | 5  | 1 |
| Case 25 | 14 | 22,377,905 | 22,978,577  | 6  | 0 | 6  | 1 |
| Case 25 | 14 | 22,978,760 | 37,132,525  | 5  | 0 | 5  | 1 |
| Case 25 | 14 | 37,133,206 | 37,190,198  | 2  | 0 | 2  | 1 |
| Case 25 | 14 | 37,194,785 | 107,287,663 | 5  | 0 | 5  | 1 |
| Case 25 | 15 | 20,034,919 | 25,936,865  | 4  | 2 | 6  | 0 |
| Case 25 | 15 | 25,937,004 | 28,544,359  | 6  | 2 | 8  | 0 |
| Case 25 | 15 | 28,962,131 | 45,413,329  | 2  | 2 | 4  | 0 |
| Case 25 | 15 | 45,413,672 | 85,843,517  | 2  | 1 | 3  | 0 |
| Case 25 | 15 | 85,856,090 | 95,388,951  | 5  | 2 | 7  | 0 |
| Case 25 | 15 | 95,407,056 | 96,126,169  | 3  | 2 | 5  | 0 |
| Case 25 | 15 | 96,126,414 | 102,461,162 | 2  | 1 | 3  | 0 |
| Case 25 | 16 | 88,165     | 1,934,183   | 4  | 2 | 6  | 0 |
| Case 25 | 16 | 1,943,418  | 3,076,393   | 3  | 2 | 5  | 0 |
| Case 25 | 16 | 3,076,587  | 35,285,582  | 4  | 2 | 6  | 0 |
| Case 25 | 16 | 46,450,037 | 78,536,697  | 4  | 2 | 6  | 0 |
| Case 25 | 16 | 78,538,576 | 78,661,327  | 2  | 2 | 4  | 0 |
| Case 25 | 16 | 78,663,258 | 79,068,806  | 4  | 2 | 6  | 0 |
| Case 25 | 16 | 79,069,361 | 79,221,892  | 3  | 2 | 5  | 0 |
| Case 25 | 16 | 79,222,287 | 90,274,695  | 4  | 2 | 6  | 0 |
| Case 25 | 17 | 11,885     | 2,771,512   | 3  | 0 | 3  | 1 |
| Case 25 | 17 | 2,773,932  | 9,306,170   | 4  | 0 | 4  | 1 |
| Case 25 | 17 | 9,308,301  | 9,673,134   | 3  | 0 | 3  | 1 |
| Case 25 | 17 | 9,673,533  | 22,242,355  | 4  | 0 | 4  | 1 |
| Case 25 | 17 | 25,268,142 | 25,295,032  | 4  | 0 | 4  | 1 |
| Case 25 | 17 | 25,329,949 | 30,195,117  | 5  | 0 | 5  | 1 |
| Case 25 | 17 | 30,206,059 | 31,319,428  | 4  | 0 | 4  | 1 |
| Case 25 | 17 | 31,319,575 | 33,112,106  | 5  | 0 | 5  | 1 |
| Case 25 | 17 | 33,112,746 | 34,233,642  | 4  | 0 | 4  | 1 |
| Case 25 | 17 | 34,233,871 | 38,023,441  | 5  | 0 | 5  | 1 |
| Case 25 | 17 | 38,025,417 | 41,719,330  | 4  | 0 | 4  | 1 |
| Case 25 | 17 | 41,719,353 | 41,982,012  | 5  | 0 | 5  | 1 |
| Case 25 | 17 | 41,988,992 | 81,060,040  | 4  | 0 | 4  | 1 |
| Case 25 | 18 | 87,505     | 14,136,061  | 4  | 2 | 6  | 0 |
| Case 25 | 18 | 14,137,657 | 14,971,178  | 4  | 1 | 5  | 0 |
| Case 25 | 18 | 14,978,677 | 15,375,878  | 3  | 1 | 4  | 0 |
| Case 25 | 18 | 18,520,354 | 19,294,674  | 3  | 1 | 4  | 0 |
| Case 25 | 18 | 19,312,766 | 19,694,044  | 8  | 1 | 9  | 0 |
| Case 25 | 18 | 19,704,036 | 20,287,443  | 10 | 1 | 11 | 0 |
| Case 25 | 18 | 20,289,772 | 20,494,552  | 12 | 2 | 14 | 0 |
| Case 25 | 18 | 20,503,651 | 20,921,480  | 9  | 2 | 11 | 0 |
| Case 25 | 18 | 20,929,994 | 21,789,347  | 5  | 2 | 7  | 0 |
| Case 25 | 18 | 21,792,650 | 31,251,740  | 3  | 0 | 3  | 1 |
| Case 25 | 18 | 31,263,320 | 34,740,290  | 6  | 0 | 6  | 1 |
| Case 25 | 18 | 34,750,687 | 38,146,461  | 5  | 1 | 6  | 0 |
| Case 25 | 18 | 38,149,766 | 39,724,275  | 5  | 0 | 5  | 1 |
| Case 25 | 18 | 39,731,208 | 41,984,948  | 3  | 0 | 3  | 1 |
| Case 25 | 18 | 42,004,083 | 78,015,180  | 4  | 0 | 4  | 1 |
| Case 25 | 19 | 260,912    | 24,629,285  | 4  | 0 | 4  | 1 |
| Case 25 | 19 | 27,732,159 | 59,097,160  | 4  | 0 | 4  | 1 |
| Case 25 | 20 | 63,244     | 4,178,869   | 3  | 2 | 5  | 0 |
| Case 25 | 20 | 4,183,819  | 6,858,994   | 3  | 1 | 4  | 0 |
| Case 25 | 20 | 6,860,859  | 7,632,355   | 3  | 2 | 5  | 0 |
| Case 25 | 20 | 7,638,703  | 14,399,991  | 4  | 2 | 6  | 0 |
| Case 25 | 20 | 14,400,165 | 15,802,635  | 5  | 2 | 7  | 0 |
| Case 25 | 20 | 15,804,432 | 20,591,395  | 3  | 2 | 5  | 0 |
| Case 25 | 20 | 20,591,968 | 26,293,985  | 3  | 0 | 3  | 1 |
| Case 25 | 20 | 29,425,357 | 33,026,003  | 7  | 0 | 7  | 1 |
| Case 25 | 20 | 33,046,761 | 34,618,440  | 5  | 3 | 8  | 0 |

|         |    |             |             |   |   |   |   |
|---------|----|-------------|-------------|---|---|---|---|
| Case 25 | 20 | 34,618,470  | 54,919,143  | 7 | 0 | 7 | 1 |
| Case 25 | 20 | 54,920,858  | 55,426,819  | 6 | 0 | 6 | 1 |
| Case 25 | 20 | 55,428,489  | 62,126,745  | 7 | 0 | 7 | 1 |
| Case 25 | 20 | 62,128,433  | 62,948,788  | 6 | 0 | 6 | 1 |
| Case 25 | 21 | 10,827,533  | 10,971,337  | 2 | 0 | 2 | 1 |
| Case 25 | 21 | 14,368,320  | 15,332,033  | 2 | 0 | 2 | 1 |
| Case 25 | 21 | 15,372,509  | 16,000,148  | 0 | 0 | 0 | 0 |
| Case 25 | 21 | 16,010,681  | 16,238,790  | 1 | 0 | 1 | 0 |
| Case 25 | 21 | 16,239,937  | 17,667,779  | 0 | 0 | 0 | 0 |
| Case 25 | 21 | 17,669,569  | 21,350,133  | 1 | 0 | 1 | 0 |
| Case 25 | 21 | 21,350,740  | 22,583,730  | 7 | 1 | 8 | 0 |
| Case 25 | 21 | 22,589,517  | 26,819,664  | 5 | 1 | 6 | 0 |
| Case 25 | 21 | 26,824,158  | 26,844,655  | 4 | 2 | 6 | 0 |
| Case 25 | 21 | 26,855,088  | 32,290,396  | 2 | 1 | 3 | 0 |
| Case 25 | 21 | 32,291,501  | 37,002,204  | 4 | 1 | 5 | 0 |
| Case 25 | 21 | 37,004,989  | 42,728,433  | 4 | 0 | 4 | 1 |
| Case 25 | 21 | 42,728,461  | 42,769,619  | 3 | 0 | 3 | 1 |
| Case 25 | 21 | 42,770,878  | 42,920,022  | 4 | 0 | 4 | 1 |
| Case 25 | 21 | 42,920,296  | 44,762,655  | 3 | 0 | 3 | 1 |
| Case 25 | 21 | 44,764,895  | 47,970,643  | 4 | 0 | 4 | 1 |
| Case 25 | 21 | 47,971,556  | 48,100,155  | 1 | 0 | 1 | 0 |
| Case 25 | 22 | 16,114,244  | 51,195,728  | 2 | 2 | 4 | 0 |
| Case 25 | X  | 2,700,157   | 2,802,568   | 0 | 0 | 0 | 0 |
| Case 25 | X  | 2,811,185   | 58,488,110  | 3 | 0 | 3 | 1 |
| Case 25 | X  | 61,694,576  | 86,436,251  | 3 | 0 | 3 | 1 |
| Case 25 | X  | 86,453,874  | 88,236,598  | 0 | 0 | 0 | 0 |
| Case 25 | X  | 88,260,194  | 154,898,561 | 3 | 0 | 3 | 1 |
| Case 26 | 1  | 82,154      | 94,354,948  | 2 | 2 | 4 | 0 |
| Case 26 | 1  | 94,360,107  | 94,441,950  | 2 | 1 | 3 | 0 |
| Case 26 | 1  | 94,442,739  | 94,611,300  | 3 | 2 | 5 | 0 |
| Case 26 | 1  | 94,629,643  | 95,754,014  | 2 | 2 | 4 | 0 |
| Case 26 | 1  | 95,757,160  | 95,977,445  | 3 | 2 | 5 | 0 |
| Case 26 | 1  | 95,985,066  | 118,987,888 | 2 | 2 | 4 | 0 |
| Case 26 | 1  | 118,990,640 | 119,133,609 | 2 | 1 | 3 | 0 |
| Case 26 | 1  | 119,142,209 | 121,346,616 | 2 | 2 | 4 | 0 |
| Case 26 | 1  | 142,649,718 | 171,119,021 | 2 | 2 | 4 | 0 |
| Case 26 | 1  | 171,119,825 | 171,133,251 | 2 | 1 | 3 | 0 |
| Case 26 | 1  | 171,133,716 | 245,634,069 | 2 | 2 | 4 | 0 |
| Case 26 | 1  | 245,634,267 | 245,753,173 | 2 | 1 | 3 | 0 |
| Case 26 | 1  | 245,762,071 | 249,218,992 | 2 | 2 | 4 | 0 |
| Case 26 | 2  | 18,674      | 28,516,271  | 2 | 2 | 4 | 0 |
| Case 26 | 2  | 28,520,083  | 28,686,128  | 3 | 2 | 5 | 0 |
| Case 26 | 2  | 28,686,332  | 56,199,062  | 2 | 2 | 4 | 0 |
| Case 26 | 2  | 56,203,798  | 56,489,455  | 2 | 1 | 3 | 0 |
| Case 26 | 2  | 56,490,680  | 92,081,640  | 2 | 2 | 4 | 0 |
| Case 26 | 2  | 95,429,424  | 235,819,508 | 2 | 2 | 4 | 0 |
| Case 26 | 2  | 235,821,065 | 236,128,951 | 3 | 1 | 4 | 0 |
| Case 26 | 2  | 236,132,645 | 236,494,162 | 2 | 1 | 3 | 0 |
| Case 26 | 2  | 236,504,782 | 243,048,760 | 2 | 2 | 4 | 0 |
| Case 26 | 3  | 61,495      | 43,176,831  | 2 | 2 | 4 | 0 |
| Case 26 | 3  | 43,179,134  | 46,593,062  | 3 | 2 | 5 | 0 |
| Case 26 | 3  | 46,593,068  | 60,076,491  | 2 | 2 | 4 | 0 |
| Case 26 | 3  | 60,080,887  | 60,218,337  | 3 | 1 | 4 | 0 |
| Case 26 | 3  | 60,220,486  | 60,738,420  | 2 | 1 | 3 | 0 |
| Case 26 | 3  | 60,740,480  | 75,283,711  | 2 | 2 | 4 | 0 |
| Case 26 | 3  | 75,285,488  | 90,442,925  | 3 | 2 | 5 | 0 |
| Case 26 | 3  | 93,537,290  | 117,280,848 | 3 | 2 | 5 | 0 |
| Case 26 | 3  | 117,284,829 | 122,040,062 | 3 | 3 | 6 | 0 |
| Case 26 | 3  | 122,040,283 | 197,838,262 | 3 | 2 | 5 | 0 |
| Case 26 | 4  | 71,566      | 49,620,898  | 2 | 2 | 4 | 0 |
| Case 26 | 4  | 52,697,856  | 190,963,766 | 2 | 2 | 4 | 0 |

|         |    |             |             |   |   |   |   |
|---------|----|-------------|-------------|---|---|---|---|
| Case 26 | 5  | 38,139      | 45,781,872  | 2 | 2 | 4 | 0 |
| Case 26 | 5  | 45,839,207  | 46,399,093  | 2 | 1 | 3 | 0 |
| Case 26 | 5  | 49,457,282  | 49,614,318  | 2 | 1 | 3 | 0 |
| Case 26 | 5  | 49,624,236  | 180,693,127 | 2 | 2 | 4 | 0 |
| Case 26 | 6  | 108,666     | 1,713,390   | 2 | 2 | 4 | 0 |
| Case 26 | 6  | 1,713,692   | 1,942,538   | 2 | 1 | 3 | 0 |
| Case 26 | 6  | 1,943,154   | 31,066,419  | 2 | 2 | 4 | 0 |
| Case 26 | 6  | 31,066,671  | 31,167,852  | 3 | 2 | 5 | 0 |
| Case 26 | 6  | 31,167,927  | 58,752,089  | 2 | 2 | 4 | 0 |
| Case 26 | 6  | 61,891,118  | 120,161,995 | 2 | 2 | 4 | 0 |
| Case 26 | 6  | 120,163,401 | 120,209,557 | 3 | 3 | 6 | 0 |
| Case 26 | 6  | 120,213,880 | 170,980,171 | 2 | 2 | 4 | 0 |
| Case 26 | 7  | 44,935      | 33,569,145  | 2 | 2 | 4 | 0 |
| Case 26 | 7  | 33,569,954  | 34,682,359  | 3 | 1 | 4 | 0 |
| Case 26 | 7  | 34,682,881  | 38,292,663  | 2 | 2 | 4 | 0 |
| Case 26 | 7  | 38,297,145  | 38,412,022  | 3 | 3 | 6 | 0 |
| Case 26 | 7  | 38,412,988  | 58,019,061  | 2 | 2 | 4 | 0 |
| Case 26 | 7  | 61,056,053  | 61,852,895  | 2 | 2 | 4 | 0 |
| Case 26 | 7  | 61,994,170  | 62,437,581  | 1 | 0 | 1 | 0 |
| Case 26 | 7  | 62,458,262  | 159,119,486 | 2 | 2 | 4 | 0 |
| Case 26 | 8  | 164,984     | 43,791,691  | 3 | 2 | 5 | 0 |
| Case 26 | 8  | 46,886,735  | 146,293,414 | 3 | 2 | 5 | 0 |
| Case 26 | 9  | 46,587      | 9,310,461   | 2 | 2 | 4 | 0 |
| Case 26 | 9  | 9,311,838   | 9,348,853   | 2 | 1 | 3 | 0 |
| Case 26 | 9  | 9,349,832   | 46,944,322  | 2 | 2 | 4 | 0 |
| Case 26 | 9  | 65,629,772  | 141,066,491 | 2 | 2 | 4 | 0 |
| Case 26 | 10 | 98,087      | 38,801,009  | 2 | 2 | 4 | 0 |
| Case 26 | 10 | 38,814,815  | 39,097,912  | 2 | 1 | 3 | 0 |
| Case 26 | 10 | 42,436,301  | 42,907,260  | 2 | 1 | 3 | 0 |
| Case 26 | 10 | 42,916,042  | 81,761,489  | 2 | 2 | 4 | 0 |
| Case 26 | 10 | 81,764,081  | 81,901,858  | 2 | 1 | 3 | 0 |
| Case 26 | 10 | 81,901,859  | 135,477,883 | 2 | 2 | 4 | 0 |
| Case 26 | 11 | 193,146     | 51,591,253  | 2 | 2 | 4 | 0 |
| Case 26 | 11 | 54,794,237  | 98,456,485  | 2 | 2 | 4 | 0 |
| Case 26 | 11 | 98,457,457  | 98,746,614  | 2 | 1 | 3 | 0 |
| Case 26 | 11 | 98,759,120  | 134,934,063 | 2 | 2 | 4 | 0 |
| Case 26 | 12 | 191,619     | 34,781,188  | 2 | 2 | 4 | 0 |
| Case 26 | 12 | 34,801,271  | 34,853,011  | 1 | 1 | 2 | 0 |
| Case 26 | 12 | 37,876,400  | 38,359,611  | 1 | 1 | 2 | 0 |
| Case 26 | 12 | 38,416,139  | 133,810,935 | 2 | 2 | 4 | 0 |
| Case 26 | 13 | 19,058,717  | 55,083,287  | 2 | 2 | 4 | 0 |
| Case 26 | 13 | 55,083,737  | 55,088,792  | 2 | 1 | 3 | 0 |
| Case 26 | 13 | 55,090,025  | 114,930,955 | 2 | 2 | 4 | 0 |
| Case 26 | 13 | 114,936,089 | 115,103,529 | 2 | 1 | 3 | 0 |
| Case 26 | 14 | 19,280,733  | 20,443,751  | 4 | 2 | 6 | 0 |
| Case 26 | 14 | 20,443,757  | 22,425,847  | 2 | 2 | 4 | 0 |
| Case 26 | 14 | 22,427,444  | 22,838,630  | 3 | 2 | 5 | 0 |
| Case 26 | 14 | 22,841,531  | 22,978,516  | 3 | 3 | 6 | 0 |
| Case 26 | 14 | 22,978,577  | 61,371,810  | 2 | 2 | 4 | 0 |
| Case 26 | 14 | 61,382,747  | 62,502,684  | 2 | 1 | 3 | 0 |
| Case 26 | 14 | 62,502,992  | 107,287,663 | 2 | 2 | 4 | 0 |
| Case 26 | 15 | 20,034,919  | 102,461,162 | 2 | 2 | 4 | 0 |
| Case 26 | 16 | 88,165      | 35,285,582  | 2 | 2 | 4 | 0 |
| Case 26 | 16 | 46,450,037  | 78,149,048  | 2 | 2 | 4 | 0 |
| Case 26 | 16 | 78,151,746  | 78,684,329  | 2 | 1 | 3 | 0 |
| Case 26 | 16 | 78,688,144  | 78,790,765  | 2 | 2 | 4 | 0 |
| Case 26 | 16 | 78,797,412  | 78,955,140  | 2 | 1 | 3 | 0 |
| Case 26 | 16 | 78,960,323  | 79,085,019  | 3 | 2 | 5 | 0 |
| Case 26 | 16 | 79,085,489  | 79,199,372  | 3 | 1 | 4 | 0 |
| Case 26 | 16 | 79,199,894  | 90,274,695  | 2 | 2 | 4 | 0 |
| Case 26 | 17 | 11,885      | 22,242,355  | 2 | 2 | 4 | 0 |

|         |    |             |             |   |   |   |   |
|---------|----|-------------|-------------|---|---|---|---|
| Case 26 | 17 | 25,268,142  | 81,060,040  | 2 | 2 | 4 | 0 |
| Case 26 | 18 | 87,505      | 15,375,878  | 2 | 1 | 3 | 0 |
| Case 26 | 18 | 18,520,354  | 18,539,806  | 2 | 1 | 3 | 0 |
| Case 26 | 18 | 18,546,896  | 78,015,180  | 3 | 2 | 5 | 0 |
| Case 26 | 19 | 260,912     | 2,609,815   | 2 | 2 | 4 | 0 |
| Case 26 | 19 | 2,617,422   | 2,733,090   | 3 | 2 | 5 | 0 |
| Case 26 | 19 | 2,733,188   | 11,828,410  | 2 | 2 | 4 | 0 |
| Case 26 | 19 | 11,832,283  | 12,589,174  | 2 | 1 | 3 | 0 |
| Case 26 | 19 | 12,589,502  | 24,629,285  | 2 | 2 | 4 | 0 |
| Case 26 | 19 | 27,732,159  | 59,097,160  | 2 | 2 | 4 | 0 |
| Case 26 | 20 | 63,244      | 26,293,985  | 3 | 2 | 5 | 0 |
| Case 26 | 20 | 29,425,357  | 37,946,188  | 3 | 2 | 5 | 0 |
| Case 26 | 20 | 37,947,434  | 38,140,100  | 4 | 2 | 6 | 0 |
| Case 26 | 20 | 38,142,337  | 62,549,565  | 3 | 2 | 5 | 0 |
| Case 26 | 20 | 62,550,666  | 62,693,782  | 2 | 2 | 4 | 0 |
| Case 26 | 20 | 62,695,878  | 62,948,788  | 3 | 2 | 5 | 0 |
| Case 26 | 21 | 10,827,533  | 10,971,337  | 2 | 2 | 4 | 0 |
| Case 26 | 21 | 14,368,320  | 48,100,155  | 2 | 2 | 4 | 0 |
| Case 26 | 22 | 16,114,244  | 25,924,444  | 2 | 2 | 4 | 0 |
| Case 26 | 22 | 25,925,760  | 25,945,826  | 2 | 1 | 3 | 0 |
| Case 26 | 22 | 25,950,750  | 51,195,728  | 2 | 2 | 4 | 0 |
| Case 26 | X  | 2,700,157   | 58,488,110  | 3 | 3 | 6 | 0 |
| Case 26 | X  | 61,694,576  | 87,339,778  | 3 | 3 | 6 | 0 |
| Case 26 | X  | 87,351,834  | 87,556,778  | 2 | 2 | 4 | 0 |
| Case 26 | X  | 87,556,822  | 154,898,561 | 3 | 3 | 6 | 0 |
| Case 31 | 1  | 82,154      | 121,346,616 | 2 | 2 | 4 | 0 |
| Case 31 | 1  | 142,649,718 | 249,218,992 | 2 | 2 | 4 | 0 |
| Case 31 | 2  | 18,674      | 92,081,640  | 2 | 2 | 4 | 0 |
| Case 31 | 2  | 95,429,424  | 243,048,760 | 2 | 2 | 4 | 0 |
| Case 31 | 3  | 61,495      | 60,405,004  | 2 | 2 | 4 | 0 |
| Case 31 | 3  | 60,407,864  | 60,492,136  | 1 | 1 | 2 | 0 |
| Case 31 | 3  | 60,496,077  | 60,604,489  | 2 | 1 | 3 | 0 |
| Case 31 | 3  | 60,607,896  | 90,442,925  | 2 | 2 | 4 | 0 |
| Case 31 | 3  | 93,537,290  | 173,939,218 | 2 | 2 | 4 | 0 |
| Case 31 | 3  | 173,952,876 | 174,628,523 | 4 | 2 | 6 | 0 |
| Case 31 | 3  | 174,646,603 | 197,838,262 | 2 | 2 | 4 | 0 |
| Case 31 | 4  | 71,566      | 49,620,898  | 2 | 2 | 4 | 0 |
| Case 31 | 4  | 52,697,856  | 137,213,987 | 2 | 2 | 4 | 0 |
| Case 31 | 4  | 137,223,663 | 137,364,820 | 3 | 2 | 5 | 0 |
| Case 31 | 4  | 137,376,628 | 190,963,766 | 2 | 2 | 4 | 0 |
| Case 31 | 5  | 38,139      | 46,399,093  | 2 | 2 | 4 | 0 |
| Case 31 | 5  | 49,457,282  | 180,693,127 | 2 | 2 | 4 | 0 |
| Case 31 | 6  | 108,666     | 58,752,089  | 2 | 2 | 4 | 0 |
| Case 31 | 6  | 61,891,118  | 170,980,171 | 2 | 2 | 4 | 0 |
| Case 31 | 7  | 44,935      | 58,019,061  | 3 | 2 | 5 | 0 |
| Case 31 | 7  | 61,056,053  | 136,969,917 | 3 | 2 | 5 | 0 |
| Case 31 | 7  | 136,971,101 | 136,990,665 | 2 | 2 | 4 | 0 |
| Case 31 | 7  | 136,990,721 | 159,119,486 | 3 | 2 | 5 | 0 |
| Case 31 | 8  | 164,984     | 43,791,691  | 2 | 2 | 4 | 0 |
| Case 31 | 8  | 46,886,735  | 71,688,493  | 2 | 2 | 4 | 0 |
| Case 31 | 8  | 71,716,863  | 71,877,096  | 2 | 1 | 3 | 0 |
| Case 31 | 8  | 71,901,737  | 146,293,414 | 2 | 2 | 4 | 0 |
| Case 31 | 9  | 46,587      | 3,204,115   | 2 | 2 | 4 | 0 |
| Case 31 | 9  | 3,207,669   | 4,555,305   | 2 | 1 | 3 | 0 |
| Case 31 | 9  | 4,555,573   | 46,944,322  | 2 | 2 | 4 | 0 |
| Case 31 | 9  | 65,629,772  | 77,247,597  | 2 | 2 | 4 | 0 |
| Case 31 | 9  | 77,254,334  | 77,318,073  | 3 | 2 | 5 | 0 |
| Case 31 | 9  | 77,323,772  | 141,066,491 | 2 | 2 | 4 | 0 |
| Case 31 | 10 | 98,087      | 39,097,912  | 2 | 2 | 4 | 0 |
| Case 31 | 10 | 42,436,301  | 135,477,883 | 2 | 2 | 4 | 0 |
| Case 31 | 11 | 193,146     | 51,591,253  | 2 | 2 | 4 | 0 |

|         |    |             |             |   |   |   |   |
|---------|----|-------------|-------------|---|---|---|---|
| Case 31 | 11 | 54,794,237  | 134,934,063 | 2 | 2 | 4 | 0 |
| Case 31 | 12 | 191,619     | 34,853,011  | 2 | 2 | 4 | 0 |
| Case 31 | 12 | 37,876,400  | 128,551,441 | 2 | 2 | 4 | 0 |
| Case 31 | 12 | 128,552,594 | 128,556,076 | 3 | 2 | 5 | 0 |
| Case 31 | 12 | 128,556,959 | 133,810,935 | 2 | 2 | 4 | 0 |
| Case 31 | 13 | 19,058,717  | 115,103,529 | 2 | 2 | 4 | 0 |
| Case 31 | 14 | 19,280,733  | 20,425,051  | 3 | 2 | 5 | 0 |
| Case 31 | 14 | 20,426,742  | 22,609,120  | 2 | 2 | 4 | 0 |
| Case 31 | 14 | 22,609,387  | 23,033,838  | 3 | 2 | 5 | 0 |
| Case 31 | 14 | 23,034,184  | 107,287,663 | 2 | 2 | 4 | 0 |
| Case 31 | 15 | 20,034,919  | 102,461,162 | 2 | 2 | 4 | 0 |
| Case 31 | 16 | 88,165      | 35,285,582  | 2 | 2 | 4 | 0 |
| Case 31 | 16 | 46,450,037  | 90,274,695  | 2 | 2 | 4 | 0 |
| Case 31 | 17 | 11,885      | 22,242,355  | 2 | 2 | 4 | 0 |
| Case 31 | 17 | 25,268,142  | 81,060,040  | 2 | 2 | 4 | 0 |
| Case 31 | 18 | 87,505      | 15,375,878  | 2 | 2 | 4 | 0 |
| Case 31 | 18 | 18,520,354  | 78,015,180  | 2 | 2 | 4 | 0 |
| Case 31 | 19 | 260,912     | 24,629,285  | 2 | 2 | 4 | 0 |
| Case 31 | 19 | 27,732,159  | 41,333,284  | 3 | 2 | 5 | 0 |
| Case 31 | 19 | 41,341,589  | 41,365,095  | 0 | 0 | 0 | 0 |
| Case 31 | 19 | 41,379,148  | 59,097,160  | 3 | 2 | 5 | 0 |
| Case 31 | 20 | 63,244      | 14,747,471  | 3 | 2 | 5 | 0 |
| Case 31 | 20 | 14,753,767  | 15,043,623  | 3 | 1 | 4 | 0 |
| Case 31 | 20 | 15,051,717  | 26,293,985  | 3 | 2 | 5 | 0 |
| Case 31 | 20 | 29,425,357  | 62,948,788  | 3 | 2 | 5 | 0 |
| Case 31 | 21 | 10,827,533  | 10,971,337  | 2 | 2 | 4 | 0 |
| Case 31 | 21 | 14,368,320  | 48,100,155  | 2 | 2 | 4 | 0 |
| Case 31 | 22 | 16,114,244  | 51,195,728  | 2 | 2 | 4 | 0 |
| Case 31 | X  | 2,700,157   | 58,488,110  | 2 | 1 | 3 | 0 |
| Case 31 | X  | 61,694,576  | 154,898,561 | 2 | 1 | 3 | 0 |
| Case 34 | 1  | 82,154      | 121,346,616 | 1 | 1 | 2 | 0 |
| Case 34 | 1  | 142,649,718 | 249,218,992 | 1 | 1 | 2 | 0 |
| Case 34 | 2  | 18,674      | 92,081,640  | 1 | 1 | 2 | 0 |
| Case 34 | 2  | 95,429,424  | 243,048,760 | 1 | 1 | 2 | 0 |
| Case 34 | 3  | 61,495      | 90,442,925  | 1 | 1 | 2 | 0 |
| Case 34 | 3  | 93,537,290  | 197,838,262 | 1 | 1 | 2 | 0 |
| Case 34 | 4  | 71,566      | 49,620,898  | 1 | 1 | 2 | 0 |
| Case 34 | 4  | 52,697,856  | 190,963,766 | 1 | 1 | 2 | 0 |
| Case 34 | 5  | 38,139      | 46,399,093  | 1 | 1 | 2 | 0 |
| Case 34 | 5  | 49,457,282  | 180,693,127 | 1 | 1 | 2 | 0 |
| Case 34 | 6  | 108,666     | 58,752,089  | 1 | 1 | 2 | 0 |
| Case 34 | 6  | 61,891,118  | 170,980,171 | 1 | 1 | 2 | 0 |
| Case 34 | 7  | 44,935      | 58,019,061  | 1 | 1 | 2 | 0 |
| Case 34 | 7  | 61,056,053  | 159,119,486 | 1 | 1 | 2 | 0 |
| Case 34 | 8  | 164,984     | 43,791,691  | 1 | 1 | 2 | 0 |
| Case 34 | 8  | 46,886,735  | 146,293,414 | 1 | 1 | 2 | 0 |
| Case 34 | 9  | 46,587      | 46,944,322  | 1 | 1 | 2 | 0 |
| Case 34 | 9  | 65,629,772  | 141,066,491 | 1 | 1 | 2 | 0 |
| Case 34 | 10 | 98,087      | 39,097,912  | 1 | 1 | 2 | 0 |
| Case 34 | 10 | 42,436,301  | 135,477,883 | 1 | 1 | 2 | 0 |
| Case 34 | 11 | 193,146     | 23,841,971  | 1 | 1 | 2 | 0 |
| Case 34 | 11 | 23,844,975  | 24,553,440  | 1 | 0 | 1 | 0 |
| Case 34 | 11 | 24,554,271  | 51,591,253  | 1 | 1 | 2 | 0 |
| Case 34 | 11 | 54,794,237  | 134,934,063 | 1 | 1 | 2 | 0 |
| Case 34 | 12 | 191,619     | 34,853,011  | 1 | 1 | 2 | 0 |
| Case 34 | 12 | 37,876,400  | 133,810,935 | 1 | 1 | 2 | 0 |
| Case 34 | 13 | 19,058,717  | 115,103,529 | 1 | 1 | 2 | 0 |
| Case 34 | 14 | 19,280,733  | 107,287,663 | 1 | 1 | 2 | 0 |
| Case 34 | 15 | 20,034,919  | 102,461,162 | 1 | 1 | 2 | 0 |
| Case 34 | 16 | 88,165      | 35,285,582  | 1 | 1 | 2 | 0 |
| Case 34 | 16 | 46,450,037  | 90,274,695  | 1 | 1 | 2 | 0 |

|         |    |             |             |   |   |   |   |
|---------|----|-------------|-------------|---|---|---|---|
| Case 34 | 17 | 11,885      | 22,242,355  | 1 | 1 | 2 | 0 |
| Case 34 | 17 | 25,268,142  | 81,060,040  | 1 | 1 | 2 | 0 |
| Case 34 | 18 | 87,505      | 15,375,878  | 1 | 1 | 2 | 0 |
| Case 34 | 18 | 18,520,354  | 78,015,180  | 1 | 1 | 2 | 0 |
| Case 34 | 19 | 260,912     | 24,629,285  | 1 | 1 | 2 | 0 |
| Case 34 | 19 | 27,732,159  | 59,097,160  | 1 | 1 | 2 | 0 |
| Case 34 | 20 | 63,244      | 26,293,985  | 1 | 1 | 2 | 0 |
| Case 34 | 20 | 29,425,357  | 62,948,788  | 1 | 1 | 2 | 0 |
| Case 34 | 21 | 10,827,533  | 10,971,337  | 1 | 1 | 2 | 0 |
| Case 34 | 21 | 14,368,320  | 48,100,155  | 1 | 1 | 2 | 0 |
| Case 34 | 22 | 16,114,244  | 51,195,728  | 1 | 1 | 2 | 0 |
| Case 34 | X  | 2,700,157   | 58,488,110  | 1 | 0 | 1 | 0 |
| Case 34 | X  | 61,694,576  | 154,898,561 | 1 | 0 | 1 | 0 |
| Case 35 | 1  | 82,154      | 26,694,260  | 1 | 1 | 2 | 0 |
| Case 35 | 1  | 26,694,968  | 27,939,581  | 1 | 0 | 1 | 0 |
| Case 35 | 1  | 27,942,346  | 121,346,616 | 1 | 1 | 2 | 0 |
| Case 35 | 1  | 142,649,718 | 249,218,992 | 1 | 1 | 2 | 0 |
| Case 35 | 2  | 18,674      | 6,486,257   | 1 | 1 | 2 | 0 |
| Case 35 | 2  | 6,489,121   | 6,503,855   | 1 | 0 | 1 | 0 |
| Case 35 | 2  | 6,505,563   | 92,081,640  | 1 | 1 | 2 | 0 |
| Case 35 | 2  | 95,429,424  | 243,048,760 | 1 | 1 | 2 | 0 |
| Case 35 | 3  | 61,495      | 59,828,149  | 1 | 1 | 2 | 0 |
| Case 35 | 3  | 59,828,477  | 59,920,004  | 1 | 0 | 1 | 0 |
| Case 35 | 3  | 59,920,697  | 60,170,083  | 2 | 0 | 2 | 1 |
| Case 35 | 3  | 60,186,728  | 60,388,322  | 2 | 1 | 3 | 0 |
| Case 35 | 3  | 60,388,743  | 60,465,279  | 0 | 0 | 0 | 0 |
| Case 35 | 3  | 60,472,107  | 60,581,806  | 1 | 0 | 1 | 0 |
| Case 35 | 3  | 60,585,933  | 90,442,925  | 2 | 1 | 3 | 0 |
| Case 35 | 3  | 93,537,290  | 197,838,262 | 2 | 1 | 3 | 0 |
| Case 35 | 4  | 71,566      | 49,620,898  | 1 | 1 | 2 | 0 |
| Case 35 | 4  | 52,697,856  | 190,963,766 | 1 | 1 | 2 | 0 |
| Case 35 | 5  | 38,139      | 46,399,093  | 1 | 1 | 2 | 0 |
| Case 35 | 5  | 49,457,282  | 166,823,660 | 1 | 1 | 2 | 0 |
| Case 35 | 5  | 166,824,102 | 180,693,127 | 2 | 1 | 3 | 0 |
| Case 35 | 6  | 108,666     | 1,801,390   | 2 | 0 | 2 | 1 |
| Case 35 | 6  | 1,807,658   | 2,190,846   | 1 | 0 | 1 | 0 |
| Case 35 | 6  | 2,199,634   | 20,057,330  | 2 | 0 | 2 | 1 |
| Case 35 | 6  | 20,057,889  | 21,589,716  | 3 | 0 | 3 | 1 |
| Case 35 | 6  | 21,590,104  | 21,639,594  | 2 | 0 | 2 | 1 |
| Case 35 | 6  | 21,658,881  | 32,657,578  | 3 | 0 | 3 | 1 |
| Case 35 | 6  | 32,658,079  | 32,677,397  | 4 | 0 | 4 | 1 |
| Case 35 | 6  | 32,677,440  | 47,252,045  | 3 | 0 | 3 | 1 |
| Case 35 | 6  | 47,252,055  | 58,752,089  | 2 | 1 | 3 | 0 |
| Case 35 | 6  | 61,891,118  | 120,978,943 | 2 | 1 | 3 | 0 |
| Case 35 | 6  | 120,983,610 | 170,980,171 | 1 | 1 | 2 | 0 |
| Case 35 | 7  | 44,935      | 44,327,055  | 1 | 1 | 2 | 0 |
| Case 35 | 7  | 44,331,505  | 44,353,609  | 1 | 0 | 1 | 0 |
| Case 35 | 7  | 44,361,910  | 58,019,061  | 1 | 1 | 2 | 0 |
| Case 35 | 7  | 61,056,053  | 159,119,486 | 1 | 1 | 2 | 0 |
| Case 35 | 8  | 164,984     | 27,539,370  | 2 | 1 | 3 | 0 |
| Case 35 | 8  | 27,542,849  | 27,591,506  | 1 | 1 | 2 | 0 |
| Case 35 | 8  | 27,591,849  | 43,791,691  | 2 | 1 | 3 | 0 |
| Case 35 | 8  | 46,886,735  | 146,293,414 | 2 | 1 | 3 | 0 |
| Case 35 | 9  | 46,587      | 46,944,322  | 1 | 1 | 2 | 0 |
| Case 35 | 9  | 65,629,772  | 141,066,491 | 1 | 1 | 2 | 0 |
| Case 35 | 10 | 98,087      | 39,097,912  | 1 | 1 | 2 | 0 |
| Case 35 | 10 | 42,436,301  | 135,477,883 | 1 | 1 | 2 | 0 |
| Case 35 | 11 | 193,146     | 51,591,253  | 1 | 1 | 2 | 0 |
| Case 35 | 11 | 54,794,237  | 97,588,674  | 1 | 1 | 2 | 0 |
| Case 35 | 11 | 97,591,699  | 97,732,269  | 0 | 0 | 0 | 0 |
| Case 35 | 11 | 97,733,303  | 120,312,746 | 1 | 1 | 2 | 0 |

|         |    |             |             |   |   |   |   |
|---------|----|-------------|-------------|---|---|---|---|
| Case 35 | 11 | 120,317,731 | 120,630,452 | 1 | 0 | 1 | 0 |
| Case 35 | 11 | 120,644,115 | 134,934,063 | 1 | 1 | 2 | 0 |
| Case 35 | 12 | 191,619     | 34,826,574  | 1 | 1 | 2 | 0 |
| Case 35 | 12 | 34,853,011  | 34,853,011  | 1 | 0 | 1 | 0 |
| Case 35 | 12 | 37,876,400  | 38,528,487  | 1 | 0 | 1 | 0 |
| Case 35 | 12 | 38,529,491  | 133,810,935 | 1 | 1 | 2 | 0 |
| Case 35 | 13 | 19,058,717  | 21,722,557  | 2 | 1 | 3 | 0 |
| Case 35 | 13 | 21,723,281  | 21,746,637  | 4 | 2 | 6 | 0 |
| Case 35 | 13 | 21,747,051  | 115,103,529 | 2 | 1 | 3 | 0 |
| Case 35 | 14 | 19,280,733  | 22,483,101  | 1 | 1 | 2 | 0 |
| Case 35 | 14 | 22,483,999  | 23,034,184  | 2 | 1 | 3 | 0 |
| Case 35 | 14 | 23,035,587  | 107,287,663 | 1 | 1 | 2 | 0 |
| Case 35 | 15 | 20,034,919  | 102,461,162 | 1 | 1 | 2 | 0 |
| Case 35 | 16 | 88,165      | 35,285,582  | 1 | 1 | 2 | 0 |
| Case 35 | 16 | 46,450,037  | 78,921,105  | 1 | 1 | 2 | 0 |
| Case 35 | 16 | 78,923,668  | 79,054,020  | 1 | 0 | 1 | 0 |
| Case 35 | 16 | 79,055,748  | 90,274,695  | 1 | 1 | 2 | 0 |
| Case 35 | 17 | 11,885      | 22,242,355  | 1 | 1 | 2 | 0 |
| Case 35 | 17 | 25,268,142  | 34,436,708  | 1 | 1 | 2 | 0 |
| Case 35 | 17 | 34,443,811  | 34,819,750  | 3 | 2 | 5 | 0 |
| Case 35 | 17 | 34,823,170  | 46,974,734  | 1 | 1 | 2 | 0 |
| Case 35 | 17 | 46,977,125  | 47,005,193  | 2 | 1 | 3 | 0 |
| Case 35 | 17 | 47,005,509  | 56,421,270  | 1 | 1 | 2 | 0 |
| Case 35 | 17 | 56,421,706  | 81,060,040  | 2 | 1 | 3 | 0 |
| Case 35 | 18 | 87,505      | 15,375,878  | 1 | 1 | 2 | 0 |
| Case 35 | 18 | 18,520,354  | 78,015,180  | 1 | 1 | 2 | 0 |
| Case 35 | 19 | 260,912     | 24,629,285  | 1 | 1 | 2 | 0 |
| Case 35 | 19 | 27,732,159  | 59,097,160  | 1 | 1 | 2 | 0 |
| Case 35 | 20 | 63,244      | 26,293,985  | 1 | 1 | 2 | 0 |
| Case 35 | 20 | 29,425,357  | 62,948,788  | 1 | 1 | 2 | 0 |
| Case 35 | 21 | 10,827,533  | 10,971,337  | 1 | 1 | 2 | 0 |
| Case 35 | 21 | 14,368,320  | 46,937,627  | 1 | 1 | 2 | 0 |
| Case 35 | 21 | 46,945,024  | 46,953,292  | 1 | 0 | 1 | 0 |
| Case 35 | 21 | 46,956,571  | 48,100,155  | 1 | 1 | 2 | 0 |
| Case 35 | 22 | 16,114,244  | 22,318,945  | 1 | 1 | 2 | 0 |
| Case 35 | 22 | 22,319,731  | 22,397,708  | 2 | 1 | 3 | 0 |
| Case 35 | 22 | 22,398,127  | 51,195,728  | 1 | 1 | 2 | 0 |
| Case 35 | X  | 2,700,157   | 58,488,110  | 2 | 1 | 3 | 0 |
| Case 35 | X  | 61,694,576  | 154,898,561 | 2 | 1 | 3 | 0 |
| Case 36 | 1  | 82,154      | 14,777,904  | 1 | 1 | 2 | 0 |
| Case 36 | 1  | 14,780,811  | 27,890,533  | 1 | 0 | 1 | 0 |
| Case 36 | 1  | 27,930,898  | 34,684,463  | 1 | 1 | 2 | 0 |
| Case 36 | 1  | 34,684,577  | 34,734,286  | 2 | 1 | 3 | 0 |
| Case 36 | 1  | 34,735,938  | 85,765,798  | 1 | 1 | 2 | 0 |
| Case 36 | 1  | 85,768,379  | 87,773,503  | 2 | 1 | 3 | 0 |
| Case 36 | 1  | 87,774,994  | 97,463,800  | 1 | 1 | 2 | 0 |
| Case 36 | 1  | 97,469,804  | 97,885,880  | 2 | 1 | 3 | 0 |
| Case 36 | 1  | 97,886,171  | 121,346,616 | 1 | 1 | 2 | 0 |
| Case 36 | 1  | 142,649,718 | 154,331,186 | 1 | 1 | 2 | 0 |
| Case 36 | 1  | 154,332,870 | 154,368,928 | 2 | 1 | 3 | 0 |
| Case 36 | 1  | 154,369,252 | 156,565,413 | 1 | 1 | 2 | 0 |
| Case 36 | 1  | 156,566,111 | 156,628,909 | 2 | 1 | 3 | 0 |
| Case 36 | 1  | 156,629,037 | 167,226,854 | 1 | 1 | 2 | 0 |
| Case 36 | 1  | 167,233,474 | 167,715,940 | 2 | 1 | 3 | 0 |
| Case 36 | 1  | 167,722,003 | 168,996,958 | 2 | 0 | 2 | 1 |
| Case 36 | 1  | 169,000,292 | 169,035,485 | 3 | 0 | 3 | 1 |
| Case 36 | 1  | 169,041,144 | 184,018,475 | 2 | 0 | 2 | 1 |
| Case 36 | 1  | 184,020,945 | 186,163,076 | 1 | 0 | 1 | 0 |
| Case 36 | 1  | 186,164,899 | 186,796,618 | 2 | 0 | 2 | 1 |
| Case 36 | 1  | 186,797,479 | 187,832,346 | 1 | 0 | 1 | 0 |
| Case 36 | 1  | 187,834,475 | 189,496,667 | 2 | 0 | 2 | 1 |

|         |   |             |             |   |   |   |   |
|---------|---|-------------|-------------|---|---|---|---|
| Case 36 | 1 | 189,496,903 | 203,244,113 | 1 | 0 | 1 | 0 |
| Case 36 | 1 | 203,245,214 | 205,236,233 | 2 | 0 | 2 | 1 |
| Case 36 | 1 | 205,240,198 | 220,970,133 | 1 | 0 | 1 | 0 |
| Case 36 | 1 | 220,970,499 | 220,974,202 | 2 | 0 | 2 | 1 |
| Case 36 | 1 | 220,974,218 | 235,832,555 | 1 | 0 | 1 | 0 |
| Case 36 | 1 | 235,849,867 | 237,433,524 | 3 | 0 | 3 | 1 |
| Case 36 | 1 | 237,433,625 | 239,436,542 | 4 | 0 | 4 | 1 |
| Case 36 | 1 | 239,436,876 | 249,218,992 | 3 | 0 | 3 | 1 |
| Case 36 | 2 | 18,674      | 92,081,640  | 1 | 1 | 2 | 0 |
| Case 36 | 2 | 95,429,424  | 108,337,427 | 1 | 1 | 2 | 0 |
| Case 36 | 2 | 108,350,909 | 108,390,945 | 2 | 1 | 3 | 0 |
| Case 36 | 2 | 108,392,670 | 138,447,831 | 1 | 1 | 2 | 0 |
| Case 36 | 2 | 138,448,951 | 139,082,736 | 2 | 1 | 3 | 0 |
| Case 36 | 2 | 139,085,690 | 205,926,400 | 1 | 1 | 2 | 0 |
| Case 36 | 2 | 205,942,560 | 205,978,220 | 1 | 0 | 1 | 0 |
| Case 36 | 2 | 205,986,331 | 206,405,891 | 2 | 0 | 2 | 1 |
| Case 36 | 2 | 206,418,087 | 207,960,996 | 1 | 1 | 2 | 0 |
| Case 36 | 2 | 207,962,456 | 208,664,252 | 2 | 1 | 3 | 0 |
| Case 36 | 2 | 208,686,410 | 232,838,890 | 1 | 1 | 2 | 0 |
| Case 36 | 2 | 232,843,189 | 234,594,083 | 1 | 0 | 1 | 0 |
| Case 36 | 2 | 234,595,615 | 234,718,294 | 2 | 0 | 2 | 1 |
| Case 36 | 2 | 234,718,524 | 243,048,760 | 1 | 0 | 1 | 0 |
| Case 36 | 3 | 61,495      | 74,011,687  | 1 | 1 | 2 | 0 |
| Case 36 | 3 | 74,019,380  | 74,095,484  | 2 | 1 | 3 | 0 |
| Case 36 | 3 | 74,096,374  | 90,442,925  | 1 | 1 | 2 | 0 |
| Case 36 | 3 | 93,537,290  | 141,218,057 | 1 | 1 | 2 | 0 |
| Case 36 | 3 | 141,240,182 | 143,372,266 | 1 | 0 | 1 | 0 |
| Case 36 | 3 | 143,380,236 | 154,382,321 | 1 | 1 | 2 | 0 |
| Case 36 | 3 | 154,405,414 | 155,560,337 | 1 | 0 | 1 | 0 |
| Case 36 | 3 | 155,565,687 | 168,742,461 | 1 | 1 | 2 | 0 |
| Case 36 | 3 | 168,743,995 | 168,802,737 | 2 | 1 | 3 | 0 |
| Case 36 | 3 | 168,806,925 | 197,838,262 | 3 | 1 | 4 | 0 |
| Case 36 | 4 | 71,566      | 20,518,603  | 2 | 0 | 2 | 1 |
| Case 36 | 4 | 20,520,993  | 43,666,139  | 1 | 0 | 1 | 0 |
| Case 36 | 4 | 43,680,722  | 43,761,213  | 2 | 0 | 2 | 1 |
| Case 36 | 4 | 43,772,856  | 49,620,898  | 1 | 0 | 1 | 0 |
| Case 36 | 4 | 52,697,856  | 190,963,766 | 1 | 0 | 1 | 0 |
| Case 36 | 5 | 38,139      | 3,991,294   | 2 | 1 | 3 | 0 |
| Case 36 | 5 | 3,992,147   | 8,123,994   | 3 | 1 | 4 | 0 |
| Case 36 | 5 | 8,130,010   | 8,145,014   | 4 | 1 | 5 | 0 |
| Case 36 | 5 | 8,146,371   | 18,548,150  | 3 | 1 | 4 | 0 |
| Case 36 | 5 | 18,561,967  | 36,479,022  | 2 | 1 | 3 | 0 |
| Case 36 | 5 | 36,481,330  | 36,652,409  | 3 | 1 | 4 | 0 |
| Case 36 | 5 | 36,653,738  | 36,762,502  | 2 | 1 | 3 | 0 |
| Case 36 | 5 | 36,781,359  | 36,856,801  | 3 | 1 | 4 | 0 |
| Case 36 | 5 | 36,886,836  | 46,174,864  | 2 | 1 | 3 | 0 |
| Case 36 | 5 | 46,228,333  | 46,399,093  | 1 | 1 | 2 | 0 |
| Case 36 | 5 | 49,457,282  | 49,492,838  | 1 | 1 | 2 | 0 |
| Case 36 | 5 | 49,522,346  | 54,118,833  | 2 | 1 | 3 | 0 |
| Case 36 | 5 | 54,126,400  | 95,407,894  | 1 | 0 | 1 | 0 |
| Case 36 | 5 | 95,410,393  | 96,011,023  | 2 | 0 | 2 | 1 |
| Case 36 | 5 | 96,017,956  | 177,913,591 | 1 | 0 | 1 | 0 |
| Case 36 | 5 | 177,916,502 | 180,693,127 | 2 | 0 | 2 | 1 |
| Case 36 | 6 | 108,666     | 11,667,796  | 1 | 0 | 1 | 0 |
| Case 36 | 6 | 11,677,538  | 12,614,259  | 0 | 0 | 0 | 0 |
| Case 36 | 6 | 12,616,984  | 26,010,881  | 1 | 0 | 1 | 0 |
| Case 36 | 6 | 26,016,462  | 31,348,077  | 1 | 1 | 2 | 0 |
| Case 36 | 6 | 31,348,200  | 31,354,560  | 2 | 1 | 3 | 0 |
| Case 36 | 6 | 31,354,595  | 31,356,574  | 1 | 1 | 2 | 0 |
| Case 36 | 6 | 31,360,255  | 31,453,640  | 1 | 0 | 1 | 0 |
| Case 36 | 6 | 31,456,567  | 31,463,718  | 1 | 1 | 2 | 0 |



|         |    |             |             |   |   |   |   |
|---------|----|-------------|-------------|---|---|---|---|
| Case 36 | 6  | 31,463,963  | 31,463,963  | 2 | 1 | 3 | 0 |
| Case 36 | 6  | 31,464,739  | 32,172,124  | 1 | 1 | 2 | 0 |
| Case 36 | 6  | 32,172,993  | 32,797,072  | 2 | 1 | 3 | 0 |
| Case 36 | 6  | 32,797,115  | 37,558,561  | 1 | 1 | 2 | 0 |
| Case 36 | 6  | 37,559,282  | 40,645,737  | 2 | 1 | 3 | 0 |
| Case 36 | 6  | 40,648,757  | 44,449,216  | 1 | 1 | 2 | 0 |
| Case 36 | 6  | 44,449,320  | 58,752,089  | 2 | 1 | 3 | 0 |
| Case 36 | 6  | 61,891,118  | 72,385,311  | 2 | 1 | 3 | 0 |
| Case 36 | 6  | 72,406,319  | 135,123,681 | 1 | 0 | 1 | 0 |
| Case 36 | 6  | 135,128,858 | 137,967,252 | 2 | 1 | 3 | 0 |
| Case 36 | 6  | 137,970,840 | 141,045,961 | 1 | 1 | 2 | 0 |
| Case 36 | 6  | 141,061,418 | 149,357,384 | 2 | 1 | 3 | 0 |
| Case 36 | 6  | 149,359,209 | 159,548,276 | 1 | 1 | 2 | 0 |
| Case 36 | 6  | 159,549,389 | 170,980,171 | 1 | 0 | 1 | 0 |
| Case 36 | 7  | 44,935      | 83,185      | 2 | 1 | 3 | 0 |
| Case 36 | 7  | 93,811      | 4,560,681   | 2 | 0 | 2 | 1 |
| Case 36 | 7  | 4,563,881   | 5,545,427   | 1 | 0 | 1 | 0 |
| Case 36 | 7  | 5,562,740   | 22,191,936  | 2 | 1 | 3 | 0 |
| Case 36 | 7  | 22,194,105  | 38,292,663  | 1 | 1 | 2 | 0 |
| Case 36 | 7  | 38,297,145  | 38,412,022  | 2 | 1 | 3 | 0 |
| Case 36 | 7  | 38,412,988  | 58,019,061  | 1 | 1 | 2 | 0 |
| Case 36 | 7  | 61,056,053  | 87,230,107  | 1 | 1 | 2 | 0 |
| Case 36 | 7  | 87,230,193  | 87,251,641  | 2 | 1 | 3 | 0 |
| Case 36 | 7  | 87,256,937  | 94,997,756  | 1 | 1 | 2 | 0 |
| Case 36 | 7  | 94,997,953  | 95,082,010  | 2 | 1 | 3 | 0 |
| Case 36 | 7  | 95,084,622  | 128,097,359 | 1 | 1 | 2 | 0 |
| Case 36 | 7  | 128,097,466 | 128,932,749 | 1 | 0 | 1 | 0 |
| Case 36 | 7  | 128,953,370 | 135,661,332 | 1 | 1 | 2 | 0 |
| Case 36 | 7  | 135,675,538 | 136,452,082 | 2 | 1 | 3 | 0 |
| Case 36 | 7  | 136,508,139 | 143,217,190 | 1 | 1 | 2 | 0 |
| Case 36 | 7  | 143,425,378 | 145,334,673 | 1 | 0 | 1 | 0 |
| Case 36 | 7  | 145,346,374 | 159,119,486 | 2 | 0 | 2 | 1 |
| Case 36 | 8  | 164,984     | 43,791,691  | 1 | 0 | 1 | 0 |
| Case 36 | 8  | 46,886,735  | 65,014,043  | 1 | 0 | 1 | 0 |
| Case 36 | 8  | 65,045,688  | 125,792,809 | 1 | 1 | 2 | 0 |
| Case 36 | 8  | 125,797,266 | 146,293,414 | 2 | 1 | 3 | 0 |
| Case 36 | 9  | 46,587      | 3,378,048   | 2 | 0 | 2 | 1 |
| Case 36 | 9  | 3,380,518   | 4,860,569   | 1 | 0 | 1 | 0 |
| Case 36 | 9  | 4,860,943   | 4,926,113   | 2 | 0 | 2 | 1 |
| Case 36 | 9  | 4,930,006   | 5,021,514   | 1 | 0 | 1 | 0 |
| Case 36 | 9  | 5,022,807   | 20,676,454  | 2 | 0 | 2 | 1 |
| Case 36 | 9  | 20,690,387  | 24,515,111  | 0 | 0 | 0 | 0 |
| Case 36 | 9  | 24,522,869  | 29,869,252  | 3 | 0 | 3 | 1 |
| Case 36 | 9  | 29,874,745  | 32,432,681  | 2 | 0 | 2 | 1 |
| Case 36 | 9  | 32,435,676  | 32,458,081  | 3 | 0 | 3 | 1 |
| Case 36 | 9  | 32,459,450  | 33,629,249  | 2 | 0 | 2 | 1 |
| Case 36 | 9  | 33,633,838  | 34,249,882  | 1 | 0 | 1 | 0 |
| Case 36 | 9  | 34,252,127  | 35,310,492  | 2 | 0 | 2 | 1 |
| Case 36 | 9  | 35,343,563  | 46,944,322  | 2 | 1 | 3 | 0 |
| Case 36 | 9  | 65,629,772  | 71,082,682  | 2 | 0 | 2 | 1 |
| Case 36 | 9  | 71,083,458  | 141,066,491 | 1 | 0 | 1 | 0 |
| Case 36 | 10 | 98,087      | 13,359,607  | 1 | 0 | 1 | 0 |
| Case 36 | 10 | 13,363,717  | 39,097,912  | 1 | 1 | 2 | 0 |
| Case 36 | 10 | 42,436,301  | 115,096,759 | 1 | 1 | 2 | 0 |
| Case 36 | 10 | 115,098,417 | 123,913,330 | 1 | 0 | 1 | 0 |
| Case 36 | 10 | 123,913,826 | 135,477,883 | 2 | 0 | 2 | 1 |
| Case 36 | 11 | 193,146     | 11,195,213  | 1 | 1 | 2 | 0 |
| Case 36 | 11 | 11,198,251  | 11,211,567  | 2 | 1 | 3 | 0 |
| Case 36 | 11 | 11,214,588  | 40,229,937  | 1 | 1 | 2 | 0 |
| Case 36 | 11 | 40,238,179  | 40,284,977  | 2 | 1 | 3 | 0 |
| Case 36 | 11 | 40,285,275  | 51,591,253  | 1 | 1 | 2 | 0 |

|         |    |             |             |   |   |   |   |
|---------|----|-------------|-------------|---|---|---|---|
| Case 36 | 11 | 54,794,237  | 74,381,029  | 1 | 1 | 2 | 0 |
| Case 36 | 11 | 74,386,732  | 74,399,425  | 2 | 1 | 3 | 0 |
| Case 36 | 11 | 74,400,999  | 104,478,511 | 1 | 1 | 2 | 0 |
| Case 36 | 11 | 104,483,705 | 109,812,865 | 1 | 0 | 1 | 0 |
| Case 36 | 11 | 109,825,345 | 127,317,894 | 2 | 0 | 2 | 1 |
| Case 36 | 11 | 127,324,160 | 129,150,067 | 1 | 1 | 2 | 0 |
| Case 36 | 11 | 129,161,105 | 129,202,392 | 2 | 1 | 3 | 0 |
| Case 36 | 11 | 129,208,260 | 134,934,063 | 1 | 1 | 2 | 0 |
| Case 36 | 12 | 191,619     | 6,022,495   | 1 | 1 | 2 | 0 |
| Case 36 | 12 | 6,025,054   | 6,063,142   | 2 | 1 | 3 | 0 |
| Case 36 | 12 | 6,066,357   | 6,710,193   | 1 | 1 | 2 | 0 |
| Case 36 | 12 | 6,711,144   | 7,246,707   | 2 | 1 | 3 | 0 |
| Case 36 | 12 | 7,248,556   | 16,500,358  | 1 | 1 | 2 | 0 |
| Case 36 | 12 | 16,500,448  | 16,551,609  | 2 | 1 | 3 | 0 |
| Case 36 | 12 | 16,552,279  | 28,059,187  | 1 | 1 | 2 | 0 |
| Case 36 | 12 | 28,060,631  | 28,296,711  | 2 | 1 | 3 | 0 |
| Case 36 | 12 | 28,300,776  | 34,853,011  | 1 | 1 | 2 | 0 |
| Case 36 | 12 | 37,876,400  | 72,508,779  | 1 | 1 | 2 | 0 |
| Case 36 | 12 | 72,538,429  | 75,861,087  | 1 | 0 | 1 | 0 |
| Case 36 | 12 | 75,862,495  | 76,339,221  | 2 | 0 | 2 | 1 |
| Case 36 | 12 | 76,349,064  | 89,625,237  | 1 | 0 | 1 | 0 |
| Case 36 | 12 | 89,639,948  | 89,893,877  | 3 | 0 | 3 | 1 |
| Case 36 | 12 | 89,905,537  | 108,942,984 | 1 | 0 | 1 | 0 |
| Case 36 | 12 | 108,949,739 | 116,758,547 | 2 | 0 | 2 | 1 |
| Case 36 | 12 | 116,761,667 | 116,790,821 | 3 | 0 | 3 | 1 |
| Case 36 | 12 | 116,792,092 | 118,263,370 | 2 | 0 | 2 | 1 |
| Case 36 | 12 | 118,265,441 | 118,634,906 | 3 | 0 | 3 | 1 |
| Case 36 | 12 | 118,639,246 | 119,840,700 | 2 | 0 | 2 | 1 |
| Case 36 | 12 | 119,840,837 | 120,516,525 | 3 | 0 | 3 | 1 |
| Case 36 | 12 | 120,519,124 | 133,810,935 | 2 | 0 | 2 | 1 |
| Case 36 | 13 | 19,058,717  | 20,821,326  | 1 | 0 | 1 | 0 |
| Case 36 | 13 | 20,822,102  | 21,007,342  | 2 | 0 | 2 | 1 |
| Case 36 | 13 | 21,013,995  | 30,172,458  | 1 | 0 | 1 | 0 |
| Case 36 | 13 | 30,172,495  | 115,103,529 | 2 | 0 | 2 | 1 |
| Case 36 | 14 | 19,280,733  | 22,428,984  | 1 | 1 | 2 | 0 |
| Case 36 | 14 | 22,429,647  | 22,963,646  | 2 | 1 | 3 | 0 |
| Case 36 | 14 | 22,964,782  | 42,870,963  | 1 | 1 | 2 | 0 |
| Case 36 | 14 | 42,876,996  | 42,946,163  | 0 | 0 | 0 | 0 |
| Case 36 | 14 | 42,952,898  | 93,516,465  | 1 | 1 | 2 | 0 |
| Case 36 | 14 | 93,523,577  | 94,785,742  | 1 | 0 | 1 | 0 |
| Case 36 | 14 | 94,787,288  | 95,217,612  | 2 | 0 | 2 | 1 |
| Case 36 | 14 | 95,218,549  | 107,287,663 | 1 | 0 | 1 | 0 |
| Case 36 | 15 | 20,034,919  | 34,070,882  | 1 | 1 | 2 | 0 |
| Case 36 | 15 | 34,071,305  | 34,481,168  | 1 | 0 | 1 | 0 |
| Case 36 | 15 | 34,483,333  | 36,165,311  | 1 | 1 | 2 | 0 |
| Case 36 | 15 | 36,174,150  | 38,581,206  | 2 | 1 | 3 | 0 |
| Case 36 | 15 | 38,581,841  | 65,273,595  | 1 | 1 | 2 | 0 |
| Case 36 | 15 | 65,281,624  | 94,916,384  | 2 | 1 | 3 | 0 |
| Case 36 | 15 | 94,919,347  | 102,461,162 | 2 | 2 | 4 | 0 |
| Case 36 | 16 | 88,165      | 35,285,582  | 1 | 1 | 2 | 0 |
| Case 36 | 16 | 46,450,037  | 47,829,536  | 2 | 1 | 3 | 0 |
| Case 36 | 16 | 47,859,931  | 48,125,092  | 1 | 1 | 2 | 0 |
| Case 36 | 16 | 48,130,781  | 90,274,695  | 1 | 0 | 1 | 0 |
| Case 36 | 17 | 11,885      | 17,420,218  | 1 | 0 | 1 | 0 |
| Case 36 | 17 | 17,424,333  | 22,242,355  | 1 | 1 | 2 | 0 |
| Case 36 | 17 | 25,268,142  | 25,671,471  | 1 | 1 | 2 | 0 |
| Case 36 | 17 | 25,689,822  | 25,875,342  | 3 | 0 | 3 | 1 |
| Case 36 | 17 | 25,879,352  | 35,419,475  | 2 | 0 | 2 | 1 |
| Case 36 | 17 | 35,424,926  | 49,072,464  | 3 | 0 | 3 | 1 |
| Case 36 | 17 | 49,072,842  | 61,838,591  | 4 | 0 | 4 | 1 |
| Case 36 | 17 | 61,843,418  | 66,742,160  | 3 | 0 | 3 | 1 |

|         |    |             |             |   |   |   |   |
|---------|----|-------------|-------------|---|---|---|---|
| Case 36 | 17 | 66,743,606  | 70,569,942  | 4 | 0 | 4 | 1 |
| Case 36 | 17 | 70,577,205  | 81,060,040  | 3 | 0 | 3 | 1 |
| Case 36 | 18 | 87,505      | 13,056,488  | 2 | 1 | 3 | 0 |
| Case 36 | 18 | 13,056,495  | 15,375,878  | 1 | 1 | 2 | 0 |
| Case 36 | 18 | 18,520,354  | 19,589,336  | 1 | 1 | 2 | 0 |
| Case 36 | 18 | 19,601,717  | 20,777,414  | 2 | 1 | 3 | 0 |
| Case 36 | 18 | 20,782,046  | 51,321,476  | 1 | 1 | 2 | 0 |
| Case 36 | 18 | 51,327,866  | 78,015,180  | 1 | 0 | 1 | 0 |
| Case 36 | 19 | 260,912     | 3,328,734   | 1 | 1 | 2 | 0 |
| Case 36 | 19 | 3,329,809   | 3,403,231   | 2 | 1 | 3 | 0 |
| Case 36 | 19 | 3,409,056   | 7,477,985   | 1 | 1 | 2 | 0 |
| Case 36 | 19 | 7,480,667   | 7,499,624   | 2 | 1 | 3 | 0 |
| Case 36 | 19 | 7,504,404   | 24,629,285  | 1 | 1 | 2 | 0 |
| Case 36 | 19 | 27,732,159  | 42,152,229  | 1 | 1 | 2 | 0 |
| Case 36 | 19 | 42,171,906  | 42,219,631  | 2 | 1 | 3 | 0 |
| Case 36 | 19 | 42,220,409  | 59,097,160  | 1 | 1 | 2 | 0 |
| Case 36 | 20 | 63,244      | 26,293,985  | 1 | 1 | 2 | 0 |
| Case 36 | 20 | 29,425,357  | 35,335,891  | 1 | 1 | 2 | 0 |
| Case 36 | 20 | 35,343,830  | 50,309,602  | 2 | 1 | 3 | 0 |
| Case 36 | 20 | 50,310,547  | 50,937,458  | 3 | 1 | 4 | 0 |
| Case 36 | 20 | 50,957,837  | 60,306,290  | 2 | 1 | 3 | 0 |
| Case 36 | 20 | 60,306,366  | 62,948,788  | 1 | 1 | 2 | 0 |
| Case 36 | 21 | 10,827,533  | 10,971,337  | 1 | 1 | 2 | 0 |
| Case 36 | 21 | 14,368,320  | 36,245,198  | 1 | 1 | 2 | 0 |
| Case 36 | 21 | 36,245,902  | 48,100,155  | 1 | 0 | 1 | 0 |
| Case 36 | 22 | 16,114,244  | 51,195,728  | 1 | 1 | 2 | 0 |
| Case 36 | X  | 2,700,157   | 10,231,726  | 1 | 1 | 2 | 0 |
| Case 36 | X  | 10,235,900  | 58,488,110  | 2 | 1 | 3 | 0 |
| Case 36 | X  | 61,694,576  | 139,617,486 | 2 | 1 | 3 | 0 |
| Case 36 | X  | 139,620,091 | 154,898,561 | 2 | 0 | 2 | 1 |
| Case 40 | 1  | 82,154      | 12,852,872  | 2 | 1 | 3 | 0 |
| Case 40 | 1  | 12,854,507  | 13,183,015  | 3 | 1 | 4 | 0 |
| Case 40 | 1  | 13,183,032  | 31,618,766  | 2 | 1 | 3 | 0 |
| Case 40 | 1  | 31,650,749  | 31,700,412  | 2 | 2 | 4 | 0 |
| Case 40 | 1  | 31,701,981  | 121,346,616 | 2 | 1 | 3 | 0 |
| Case 40 | 1  | 142,649,718 | 159,378,594 | 2 | 2 | 4 | 0 |
| Case 40 | 1  | 159,391,401 | 204,110,660 | 4 | 0 | 4 | 1 |
| Case 40 | 1  | 204,112,406 | 215,102,445 | 3 | 0 | 3 | 1 |
| Case 40 | 1  | 215,107,372 | 215,990,479 | 4 | 0 | 4 | 1 |
| Case 40 | 1  | 215,990,508 | 249,218,992 | 3 | 0 | 3 | 1 |
| Case 40 | 2  | 18,674      | 92,081,640  | 4 | 0 | 4 | 1 |
| Case 40 | 2  | 95,429,424  | 95,429,424  | 4 | 0 | 4 | 1 |
| Case 40 | 2  | 95,439,005  | 156,765,776 | 2 | 2 | 4 | 0 |
| Case 40 | 2  | 156,765,867 | 157,053,380 | 3 | 2 | 5 | 0 |
| Case 40 | 2  | 157,071,176 | 195,993,600 | 2 | 2 | 4 | 0 |
| Case 40 | 2  | 196,002,614 | 196,273,054 | 2 | 1 | 3 | 0 |
| Case 40 | 2  | 196,274,566 | 243,048,760 | 2 | 2 | 4 | 0 |
| Case 40 | 3  | 61,495      | 60,374,028  | 2 | 0 | 2 | 1 |
| Case 40 | 3  | 60,379,253  | 60,544,132  | 0 | 0 | 0 | 0 |
| Case 40 | 3  | 60,545,602  | 60,802,554  | 2 | 0 | 2 | 1 |
| Case 40 | 3  | 60,806,310  | 74,621,972  | 3 | 0 | 3 | 1 |
| Case 40 | 3  | 74,625,123  | 90,442,925  | 2 | 0 | 2 | 1 |
| Case 40 | 3  | 93,537,290  | 176,867,736 | 2 | 0 | 2 | 1 |
| Case 40 | 3  | 176,868,053 | 189,057,350 | 3 | 0 | 3 | 1 |
| Case 40 | 3  | 189,059,421 | 197,838,262 | 2 | 0 | 2 | 1 |
| Case 40 | 4  | 71,566      | 36,624,280  | 2 | 0 | 2 | 1 |
| Case 40 | 4  | 36,628,000  | 42,924,425  | 3 | 0 | 3 | 1 |
| Case 40 | 4  | 42,924,853  | 49,620,898  | 2 | 0 | 2 | 1 |
| Case 40 | 4  | 52,697,856  | 169,506,877 | 2 | 0 | 2 | 1 |
| Case 40 | 4  | 169,509,103 | 170,081,113 | 3 | 0 | 3 | 1 |
| Case 40 | 4  | 170,092,033 | 183,769,467 | 2 | 0 | 2 | 1 |

|         |    |             |             |    |   |    |   |
|---------|----|-------------|-------------|----|---|----|---|
| Case 40 | 4  | 183,771,387 | 188,493,082 | 3  | 0 | 3  | 1 |
| Case 40 | 4  | 188,498,590 | 190,963,766 | 2  | 0 | 2  | 1 |
| Case 40 | 5  | 38,139      | 18,007,227  | 4  | 1 | 5  | 0 |
| Case 40 | 5  | 18,009,498  | 29,748,193  | 5  | 2 | 7  | 0 |
| Case 40 | 5  | 29,752,624  | 46,399,093  | 4  | 1 | 5  | 0 |
| Case 40 | 5  | 49,457,282  | 49,457,282  | 4  | 1 | 5  | 0 |
| Case 40 | 5  | 49,470,083  | 180,693,127 | 2  | 0 | 2  | 1 |
| Case 40 | 6  | 108,666     | 32,683,898  | 2  | 1 | 3  | 0 |
| Case 40 | 6  | 32,684,069  | 32,698,960  | 3  | 1 | 4  | 0 |
| Case 40 | 6  | 32,698,988  | 43,050,824  | 2  | 1 | 3  | 0 |
| Case 40 | 6  | 43,063,516  | 43,083,774  | 1  | 1 | 2  | 0 |
| Case 40 | 6  | 43,089,429  | 58,752,089  | 2  | 1 | 3  | 0 |
| Case 40 | 6  | 61,891,118  | 153,431,125 | 2  | 1 | 3  | 0 |
| Case 40 | 6  | 153,441,079 | 153,664,462 | 2  | 2 | 4  | 0 |
| Case 40 | 6  | 153,664,718 | 170,980,171 | 2  | 1 | 3  | 0 |
| Case 40 | 7  | 44,935      | 3,332,630   | 3  | 2 | 5  | 0 |
| Case 40 | 7  | 3,335,041   | 3,732,253   | 4  | 2 | 6  | 0 |
| Case 40 | 7  | 3,735,435   | 7,136,077   | 3  | 2 | 5  | 0 |
| Case 40 | 7  | 7,137,541   | 20,666,235  | 4  | 2 | 6  | 0 |
| Case 40 | 7  | 20,666,750  | 38,297,145  | 3  | 2 | 5  | 0 |
| Case 40 | 7  | 38,298,285  | 38,358,412  | 5  | 2 | 7  | 0 |
| Case 40 | 7  | 38,358,956  | 46,074,194  | 3  | 2 | 5  | 0 |
| Case 40 | 7  | 46,076,308  | 47,020,795  | 4  | 2 | 6  | 0 |
| Case 40 | 7  | 47,022,589  | 58,019,061  | 3  | 2 | 5  | 0 |
| Case 40 | 7  | 61,056,053  | 75,924,218  | 3  | 2 | 5  | 0 |
| Case 40 | 7  | 75,927,125  | 97,502,737  | 4  | 2 | 6  | 0 |
| Case 40 | 7  | 97,503,140  | 103,220,611 | 3  | 2 | 5  | 0 |
| Case 40 | 7  | 103,222,306 | 104,440,625 | 4  | 2 | 6  | 0 |
| Case 40 | 7  | 104,441,909 | 105,891,464 | 3  | 2 | 5  | 0 |
| Case 40 | 7  | 105,893,463 | 126,803,474 | 4  | 2 | 6  | 0 |
| Case 40 | 7  | 126,811,206 | 136,398,712 | 3  | 2 | 5  | 0 |
| Case 40 | 7  | 136,399,178 | 137,132,243 | 4  | 2 | 6  | 0 |
| Case 40 | 7  | 137,139,529 | 141,855,193 | 3  | 2 | 5  | 0 |
| Case 40 | 7  | 141,858,688 | 142,512,803 | 4  | 2 | 6  | 0 |
| Case 40 | 7  | 142,515,811 | 143,196,926 | 3  | 2 | 5  | 0 |
| Case 40 | 7  | 143,199,169 | 147,770,563 | 4  | 2 | 6  | 0 |
| Case 40 | 7  | 147,777,777 | 159,119,486 | 3  | 2 | 5  | 0 |
| Case 40 | 8  | 164,984     | 36,486,830  | 2  | 2 | 4  | 0 |
| Case 40 | 8  | 36,492,258  | 38,302,965  | 3  | 2 | 5  | 0 |
| Case 40 | 8  | 38,314,882  | 43,791,691  | 2  | 2 | 4  | 0 |
| Case 40 | 8  | 46,886,735  | 146,293,414 | 2  | 2 | 4  | 0 |
| Case 40 | 9  | 46,587      | 21,952,926  | 1  | 0 | 1  | 0 |
| Case 40 | 9  | 21,961,866  | 22,130,065  | 0  | 0 | 0  | 0 |
| Case 40 | 9  | 22,132,076  | 32,068,378  | 2  | 0 | 2  | 1 |
| Case 40 | 9  | 32,071,372  | 46,944,322  | 3  | 0 | 3  | 1 |
| Case 40 | 9  | 65,629,772  | 71,040,170  | 2  | 0 | 2  | 1 |
| Case 40 | 9  | 71,041,878  | 99,883,513  | 3  | 0 | 3  | 1 |
| Case 40 | 9  | 99,890,895  | 120,001,836 | 3  | 1 | 4  | 0 |
| Case 40 | 9  | 120,007,625 | 141,066,491 | 2  | 1 | 3  | 0 |
| Case 40 | 10 | 98,087      | 4,452,786   | 4  | 0 | 4  | 1 |
| Case 40 | 10 | 4,453,312   | 5,244,295   | 5  | 0 | 5  | 1 |
| Case 40 | 10 | 5,246,584   | 7,904,358   | 4  | 0 | 4  | 1 |
| Case 40 | 10 | 7,906,459   | 10,230,151  | 5  | 0 | 5  | 1 |
| Case 40 | 10 | 10,230,322  | 14,485,205  | 4  | 0 | 4  | 1 |
| Case 40 | 10 | 14,487,813  | 28,624,136  | 5  | 0 | 5  | 1 |
| Case 40 | 10 | 28,632,464  | 30,316,072  | 10 | 0 | 10 | 1 |
| Case 40 | 10 | 30,316,133  | 30,398,791  | 8  | 0 | 8  | 1 |
| Case 40 | 10 | 30,398,869  | 31,294,981  | 10 | 0 | 10 | 1 |
| Case 40 | 10 | 31,297,648  | 39,097,912  | 4  | 0 | 4  | 1 |
| Case 40 | 10 | 42,436,301  | 42,436,301  | 4  | 0 | 4  | 1 |
| Case 40 | 10 | 42,444,619  | 59,557,630  | 2  | 0 | 2  | 1 |

|         |    |             |             |   |   |   |   |
|---------|----|-------------|-------------|---|---|---|---|
| Case 40 | 10 | 59,558,639  | 66,407,750  | 3 | 0 | 3 | 1 |
| Case 40 | 10 | 66,413,062  | 135,477,883 | 2 | 0 | 2 | 1 |
| Case 40 | 11 | 193,146     | 50,071,081  | 2 | 1 | 3 | 0 |
| Case 40 | 11 | 50,095,560  | 50,349,310  | 1 | 0 | 1 | 0 |
| Case 40 | 11 | 50,367,359  | 51,591,253  | 2 | 1 | 3 | 0 |
| Case 40 | 11 | 54,794,237  | 134,934,063 | 2 | 1 | 3 | 0 |
| Case 40 | 12 | 191,619     | 19,984,779  | 2 | 1 | 3 | 0 |
| Case 40 | 12 | 19,987,134  | 20,097,565  | 4 | 1 | 5 | 0 |
| Case 40 | 12 | 20,098,878  | 34,853,011  | 2 | 1 | 3 | 0 |
| Case 40 | 12 | 37,876,400  | 133,810,935 | 2 | 1 | 3 | 0 |
| Case 40 | 13 | 19,058,717  | 109,809,622 | 3 | 3 | 6 | 0 |
| Case 40 | 13 | 109,811,018 | 115,103,529 | 3 | 2 | 5 | 0 |
| Case 40 | 14 | 19,280,733  | 26,156,149  | 3 | 0 | 3 | 1 |
| Case 40 | 14 | 26,160,678  | 49,249,877  | 2 | 0 | 2 | 1 |
| Case 40 | 14 | 49,253,114  | 107,287,663 | 3 | 0 | 3 | 1 |
| Case 40 | 15 | 20,034,919  | 26,332,541  | 3 | 0 | 3 | 1 |
| Case 40 | 15 | 26,336,463  | 102,461,162 | 4 | 0 | 4 | 1 |
| Case 40 | 16 | 88,165      | 1,894,912   | 2 | 1 | 3 | 0 |
| Case 40 | 16 | 1,894,961   | 35,285,582  | 2 | 2 | 4 | 0 |
| Case 40 | 16 | 46,450,037  | 88,332,479  | 2 | 2 | 4 | 0 |
| Case 40 | 16 | 88,338,467  | 90,274,695  | 2 | 1 | 3 | 0 |
| Case 40 | 17 | 11,885      | 22,242,355  | 3 | 0 | 3 | 1 |
| Case 40 | 17 | 25,268,142  | 45,028,001  | 3 | 0 | 3 | 1 |
| Case 40 | 17 | 45,034,002  | 45,053,997  | 4 | 0 | 4 | 1 |
| Case 40 | 17 | 45,054,564  | 81,060,040  | 3 | 0 | 3 | 1 |
| Case 40 | 18 | 87,505      | 15,375,878  | 2 | 0 | 2 | 1 |
| Case 40 | 18 | 18,520,354  | 18,539,806  | 2 | 0 | 2 | 1 |
| Case 40 | 18 | 18,546,896  | 78,015,180  | 2 | 1 | 3 | 0 |
| Case 40 | 19 | 260,912     | 24,629,285  | 2 | 0 | 2 | 1 |
| Case 40 | 19 | 27,732,159  | 43,328,006  | 2 | 0 | 2 | 1 |
| Case 40 | 19 | 43,344,686  | 43,603,371  | 3 | 1 | 4 | 0 |
| Case 40 | 19 | 43,635,684  | 59,097,160  | 2 | 0 | 2 | 1 |
| Case 40 | 20 | 63,244      | 6,040,283   | 4 | 0 | 4 | 1 |
| Case 40 | 20 | 6,042,627   | 17,473,671  | 5 | 0 | 5 | 1 |
| Case 40 | 20 | 17,474,690  | 26,293,985  | 4 | 0 | 4 | 1 |
| Case 40 | 20 | 29,425,357  | 37,860,739  | 4 | 0 | 4 | 1 |
| Case 40 | 20 | 37,872,423  | 41,791,170  | 5 | 0 | 5 | 1 |
| Case 40 | 20 | 41,792,568  | 49,886,307  | 4 | 0 | 4 | 1 |
| Case 40 | 20 | 49,888,904  | 54,433,204  | 5 | 0 | 5 | 1 |
| Case 40 | 20 | 54,444,425  | 62,948,788  | 4 | 0 | 4 | 1 |
| Case 40 | 21 | 10,827,533  | 10,971,337  | 1 | 0 | 1 | 0 |
| Case 40 | 21 | 14,368,320  | 22,101,188  | 1 | 0 | 1 | 0 |
| Case 40 | 21 | 22,103,859  | 23,109,831  | 2 | 0 | 2 | 1 |
| Case 40 | 21 | 23,110,330  | 29,017,708  | 1 | 0 | 1 | 0 |
| Case 40 | 21 | 29,022,265  | 46,937,627  | 3 | 0 | 3 | 1 |
| Case 40 | 21 | 46,945,024  | 48,100,155  | 2 | 0 | 2 | 1 |
| Case 40 | 22 | 16,114,244  | 18,493,980  | 2 | 0 | 2 | 1 |
| Case 40 | 22 | 18,495,470  | 51,195,728  | 3 | 0 | 3 | 1 |
| Case 40 | X  | 2,700,157   | 58,488,110  | 2 | 1 | 3 | 0 |
| Case 40 | X  | 61,694,576  | 154,898,561 | 2 | 1 | 3 | 0 |
| Case 43 | 1  | 82,154      | 121,346,616 | 1 | 1 | 2 | 0 |
| Case 43 | 1  | 142,649,718 | 233,608,565 | 1 | 1 | 2 | 0 |
| Case 43 | 1  | 233,619,908 | 233,636,625 | 2 | 1 | 3 | 0 |
| Case 43 | 1  | 233,643,110 | 249,218,992 | 1 | 1 | 2 | 0 |
| Case 43 | 2  | 18,674      | 92,081,640  | 1 | 1 | 2 | 0 |
| Case 43 | 2  | 95,429,424  | 243,048,760 | 1 | 1 | 2 | 0 |
| Case 43 | 3  | 61,495      | 90,442,925  | 1 | 1 | 2 | 0 |
| Case 43 | 3  | 93,537,290  | 197,838,262 | 1 | 1 | 2 | 0 |
| Case 43 | 4  | 71,566      | 49,620,898  | 1 | 1 | 2 | 0 |
| Case 43 | 4  | 52,697,856  | 190,963,766 | 1 | 1 | 2 | 0 |
| Case 43 | 5  | 38,139      | 40,853,032  | 1 | 1 | 2 | 0 |

|         |    |             |             |   |   |   |   |
|---------|----|-------------|-------------|---|---|---|---|
| Case 43 | 5  | 40,853,048  | 41,008,777  | 1 | 0 | 1 | 0 |
| Case 43 | 5  | 41,008,780  | 46,399,093  | 1 | 1 | 2 | 0 |
| Case 43 | 5  | 49,457,282  | 180,693,127 | 1 | 1 | 2 | 0 |
| Case 43 | 6  | 108,666     | 58,752,089  | 1 | 1 | 2 | 0 |
| Case 43 | 6  | 61,891,118  | 170,980,171 | 1 | 1 | 2 | 0 |
| Case 43 | 7  | 44,935      | 12,693,392  | 1 | 1 | 2 | 0 |
| Case 43 | 7  | 12,695,507  | 13,731,897  | 2 | 1 | 3 | 0 |
| Case 43 | 7  | 13,734,285  | 15,734,715  | 1 | 1 | 2 | 0 |
| Case 43 | 7  | 15,734,821  | 20,183,621  | 2 | 1 | 3 | 0 |
| Case 43 | 7  | 20,184,421  | 20,960,893  | 1 | 1 | 2 | 0 |
| Case 43 | 7  | 20,960,966  | 30,716,643  | 2 | 1 | 3 | 0 |
| Case 43 | 7  | 30,717,043  | 31,230,344  | 1 | 1 | 2 | 0 |
| Case 43 | 7  | 31,234,875  | 34,702,456  | 2 | 1 | 3 | 0 |
| Case 43 | 7  | 34,703,524  | 58,019,061  | 1 | 1 | 2 | 0 |
| Case 43 | 7  | 61,056,053  | 159,119,486 | 1 | 1 | 2 | 0 |
| Case 43 | 8  | 164,984     | 43,791,691  | 1 | 1 | 2 | 0 |
| Case 43 | 8  | 46,886,735  | 146,293,414 | 1 | 1 | 2 | 0 |
| Case 43 | 9  | 46,587      | 46,944,322  | 1 | 1 | 2 | 0 |
| Case 43 | 9  | 65,629,772  | 141,066,491 | 1 | 1 | 2 | 0 |
| Case 43 | 10 | 98,087      | 39,097,912  | 1 | 1 | 2 | 0 |
| Case 43 | 10 | 42,436,301  | 135,477,883 | 1 | 1 | 2 | 0 |
| Case 43 | 11 | 193,146     | 51,591,253  | 1 | 1 | 2 | 0 |
| Case 43 | 11 | 54,794,237  | 134,934,063 | 1 | 1 | 2 | 0 |
| Case 43 | 12 | 191,619     | 34,853,011  | 1 | 1 | 2 | 0 |
| Case 43 | 12 | 37,876,400  | 133,810,935 | 1 | 1 | 2 | 0 |
| Case 43 | 13 | 19,058,717  | 115,103,529 | 1 | 1 | 2 | 0 |
| Case 43 | 14 | 19,280,733  | 107,287,663 | 1 | 1 | 2 | 0 |
| Case 43 | 15 | 20,034,919  | 102,461,162 | 1 | 1 | 2 | 0 |
| Case 43 | 16 | 88,165      | 35,285,582  | 1 | 1 | 2 | 0 |
| Case 43 | 16 | 46,450,037  | 90,274,695  | 1 | 1 | 2 | 0 |
| Case 43 | 17 | 11,885      | 22,242,355  | 1 | 1 | 2 | 0 |
| Case 43 | 17 | 25,268,142  | 81,060,040  | 1 | 1 | 2 | 0 |
| Case 43 | 18 | 87,505      | 15,375,878  | 1 | 1 | 2 | 0 |
| Case 43 | 18 | 18,520,354  | 78,015,180  | 1 | 1 | 2 | 0 |
| Case 43 | 19 | 260,912     | 24,629,285  | 1 | 1 | 2 | 0 |
| Case 43 | 19 | 27,732,159  | 59,097,160  | 1 | 1 | 2 | 0 |
| Case 43 | 20 | 63,244      | 26,293,985  | 1 | 1 | 2 | 0 |
| Case 43 | 20 | 29,425,357  | 62,948,788  | 1 | 1 | 2 | 0 |
| Case 43 | 21 | 10,827,533  | 10,971,337  | 1 | 1 | 2 | 0 |
| Case 43 | 21 | 14,368,320  | 48,100,155  | 1 | 1 | 2 | 0 |
| Case 43 | 22 | 16,114,244  | 22,312,879  | 1 | 1 | 2 | 0 |
| Case 43 | 22 | 22,313,598  | 22,573,637  | 2 | 1 | 3 | 0 |
| Case 43 | 22 | 22,584,809  | 51,195,728  | 1 | 1 | 2 | 0 |
| Case 43 | X  | 2,700,157   | 58,488,110  | 1 | 1 | 2 | 0 |
| Case 43 | X  | 61,694,576  | 154,898,561 | 1 | 1 | 2 | 0 |
| Case 44 | 1  | 82,154      | 1,897,832   | 2 | 2 | 4 | 0 |
| Case 44 | 1  | 1,897,889   | 10,235,946  | 2 | 1 | 3 | 0 |
| Case 44 | 1  | 10,236,039  | 10,672,935  | 3 | 1 | 4 | 0 |
| Case 44 | 1  | 10,673,094  | 11,090,287  | 4 | 1 | 5 | 0 |
| Case 44 | 1  | 11,090,814  | 93,525,902  | 2 | 1 | 3 | 0 |
| Case 44 | 1  | 93,530,980  | 93,942,442  | 3 | 1 | 4 | 0 |
| Case 44 | 1  | 93,953,301  | 113,949,453 | 2 | 1 | 3 | 0 |
| Case 44 | 1  | 113,951,107 | 114,420,462 | 3 | 1 | 4 | 0 |
| Case 44 | 1  | 114,421,313 | 115,399,893 | 2 | 1 | 3 | 0 |
| Case 44 | 1  | 115,400,087 | 115,591,058 | 3 | 1 | 4 | 0 |
| Case 44 | 1  | 115,592,820 | 121,346,616 | 2 | 1 | 3 | 0 |
| Case 44 | 1  | 142,649,718 | 172,101,666 | 2 | 2 | 4 | 0 |
| Case 44 | 1  | 172,106,806 | 172,189,889 | 3 | 2 | 5 | 0 |
| Case 44 | 1  | 172,191,394 | 208,299,199 | 2 | 2 | 4 | 0 |
| Case 44 | 1  | 208,300,491 | 208,390,155 | 2 | 1 | 3 | 0 |
| Case 44 | 1  | 208,390,162 | 225,117,013 | 2 | 2 | 4 | 0 |

|         |   |             |             |    |   |    |   |
|---------|---|-------------|-------------|----|---|----|---|
| Case 44 | 1 | 225,126,877 | 225,534,348 | 3  | 2 | 5  | 0 |
| Case 44 | 1 | 225,535,308 | 238,822,719 | 2  | 2 | 4  | 0 |
| Case 44 | 1 | 238,826,329 | 239,179,054 | 3  | 0 | 3  | 1 |
| Case 44 | 1 | 239,184,346 | 239,931,618 | 2  | 2 | 4  | 0 |
| Case 44 | 1 | 239,934,541 | 239,979,186 | 2  | 1 | 3  | 0 |
| Case 44 | 1 | 239,981,643 | 240,025,977 | 3  | 0 | 3  | 1 |
| Case 44 | 1 | 240,030,399 | 240,361,422 | 2  | 0 | 2  | 1 |
| Case 44 | 1 | 240,364,187 | 240,937,073 | 2  | 2 | 4  | 0 |
| Case 44 | 1 | 240,939,391 | 246,054,787 | 3  | 0 | 3  | 1 |
| Case 44 | 1 | 246,058,909 | 246,414,404 | 3  | 1 | 4  | 0 |
| Case 44 | 1 | 246,425,984 | 246,829,873 | 3  | 0 | 3  | 1 |
| Case 44 | 1 | 246,830,293 | 247,490,707 | 2  | 2 | 4  | 0 |
| Case 44 | 1 | 247,491,143 | 248,577,691 | 2  | 0 | 2  | 1 |
| Case 44 | 1 | 248,578,622 | 249,218,992 | 2  | 2 | 4  | 0 |
| Case 44 | 2 | 18,674      | 9,951,970   | 2  | 1 | 3  | 0 |
| Case 44 | 2 | 9,952,199   | 10,074,012  | 3  | 1 | 4  | 0 |
| Case 44 | 2 | 10,077,293  | 10,167,212  | 4  | 1 | 5  | 0 |
| Case 44 | 2 | 10,175,442  | 39,204,040  | 2  | 1 | 3  | 0 |
| Case 44 | 2 | 39,209,047  | 39,733,965  | 3  | 1 | 4  | 0 |
| Case 44 | 2 | 39,735,813  | 64,680,967  | 2  | 1 | 3  | 0 |
| Case 44 | 2 | 64,682,532  | 64,778,661  | 4  | 1 | 5  | 0 |
| Case 44 | 2 | 64,778,730  | 92,081,640  | 2  | 1 | 3  | 0 |
| Case 44 | 2 | 95,429,424  | 243,048,760 | 2  | 1 | 3  | 0 |
| Case 44 | 3 | 61,495      | 11,134,319  | 2  | 1 | 3  | 0 |
| Case 44 | 3 | 11,153,613  | 12,462,024  | 3  | 1 | 4  | 0 |
| Case 44 | 3 | 12,462,947  | 24,202,457  | 2  | 1 | 3  | 0 |
| Case 44 | 3 | 24,203,529  | 25,321,235  | 3  | 1 | 4  | 0 |
| Case 44 | 3 | 25,323,954  | 29,263,650  | 2  | 1 | 3  | 0 |
| Case 44 | 3 | 29,265,476  | 31,235,468  | 3  | 1 | 4  | 0 |
| Case 44 | 3 | 31,238,623  | 56,292,829  | 2  | 1 | 3  | 0 |
| Case 44 | 3 | 56,302,401  | 59,529,264  | 3  | 1 | 4  | 0 |
| Case 44 | 3 | 59,529,885  | 90,442,925  | 2  | 1 | 3  | 0 |
| Case 44 | 3 | 93,537,290  | 93,537,290  | 2  | 1 | 3  | 0 |
| Case 44 | 3 | 93,545,404  | 95,270,483  | 2  | 2 | 4  | 0 |
| Case 44 | 3 | 95,281,021  | 95,483,379  | 8  | 1 | 9  | 0 |
| Case 44 | 3 | 95,483,745  | 95,867,044  | 10 | 2 | 12 | 0 |
| Case 44 | 3 | 95,873,964  | 98,312,065  | 7  | 1 | 8  | 0 |
| Case 44 | 3 | 98,317,836  | 99,425,669  | 9  | 1 | 10 | 0 |
| Case 44 | 3 | 99,427,774  | 99,494,215  | 8  | 1 | 9  | 0 |
| Case 44 | 3 | 99,503,728  | 102,067,254 | 2  | 2 | 4  | 0 |
| Case 44 | 3 | 102,093,452 | 102,603,522 | 3  | 0 | 3  | 1 |
| Case 44 | 3 | 102,605,470 | 104,052,812 | 2  | 0 | 2  | 1 |
| Case 44 | 3 | 104,057,483 | 136,097,576 | 2  | 2 | 4  | 0 |
| Case 44 | 3 | 136,111,917 | 136,425,600 | 3  | 2 | 5  | 0 |
| Case 44 | 3 | 136,444,589 | 197,838,262 | 2  | 2 | 4  | 0 |
| Case 44 | 4 | 71,566      | 29,081,919  | 3  | 0 | 3  | 1 |
| Case 44 | 4 | 29,095,909  | 36,573,898  | 2  | 0 | 2  | 1 |
| Case 44 | 4 | 36,583,469  | 42,195,808  | 3  | 0 | 3  | 1 |
| Case 44 | 4 | 42,201,089  | 46,039,718  | 2  | 0 | 2  | 1 |
| Case 44 | 4 | 46,040,738  | 49,620,898  | 3  | 0 | 3  | 1 |
| Case 44 | 4 | 52,697,856  | 59,833,499  | 3  | 0 | 3  | 1 |
| Case 44 | 4 | 59,835,266  | 73,942,678  | 2  | 0 | 2  | 1 |
| Case 44 | 4 | 73,942,731  | 89,897,522  | 3  | 0 | 3  | 1 |
| Case 44 | 4 | 89,898,476  | 90,002,785  | 4  | 0 | 4  | 1 |
| Case 44 | 4 | 90,010,941  | 91,123,665  | 2  | 0 | 2  | 1 |
| Case 44 | 4 | 91,123,874  | 91,481,271  | 0  | 0 | 0  | 0 |
| Case 44 | 4 | 91,490,629  | 126,182,392 | 3  | 0 | 3  | 1 |
| Case 44 | 4 | 126,186,133 | 138,506,420 | 2  | 0 | 2  | 1 |
| Case 44 | 4 | 138,511,228 | 176,818,931 | 3  | 0 | 3  | 1 |
| Case 44 | 4 | 176,820,049 | 182,066,471 | 2  | 0 | 2  | 1 |
| Case 44 | 4 | 182,066,869 | 188,110,164 | 3  | 0 | 3  | 1 |

|         |   |             |             |   |   |   |   |
|---------|---|-------------|-------------|---|---|---|---|
| Case 44 | 4 | 188,114,093 | 190,963,766 | 2 | 0 | 2 | 1 |
| Case 44 | 5 | 38,139      | 26,723,783  | 4 | 0 | 4 | 1 |
| Case 44 | 5 | 26,726,226  | 27,793,344  | 5 | 0 | 5 | 1 |
| Case 44 | 5 | 27,804,605  | 41,219,940  | 4 | 0 | 4 | 1 |
| Case 44 | 5 | 41,220,990  | 41,263,582  | 5 | 0 | 5 | 1 |
| Case 44 | 5 | 41,263,849  | 46,117,770  | 4 | 0 | 4 | 1 |
| Case 44 | 5 | 46,127,095  | 46,378,957  | 3 | 0 | 3 | 1 |
| Case 44 | 5 | 46,399,093  | 46,399,093  | 2 | 0 | 2 | 1 |
| Case 44 | 5 | 49,457,282  | 49,586,870  | 2 | 0 | 2 | 1 |
| Case 44 | 5 | 49,597,497  | 99,265,096  | 3 | 0 | 3 | 1 |
| Case 44 | 5 | 99,265,408  | 105,471,506 | 2 | 0 | 2 | 1 |
| Case 44 | 5 | 105,507,543 | 162,632,615 | 3 | 0 | 3 | 1 |
| Case 44 | 5 | 162,633,207 | 166,789,841 | 2 | 0 | 2 | 1 |
| Case 44 | 5 | 166,792,419 | 171,343,349 | 3 | 0 | 3 | 1 |
| Case 44 | 5 | 171,384,675 | 180,693,127 | 4 | 0 | 4 | 1 |
| Case 44 | 6 | 108,666     | 8,158,396   | 3 | 0 | 3 | 1 |
| Case 44 | 6 | 8,170,017   | 10,271,276  | 2 | 0 | 2 | 1 |
| Case 44 | 6 | 10,273,963  | 27,998,258  | 3 | 0 | 3 | 1 |
| Case 44 | 6 | 27,999,044  | 28,784,741  | 2 | 0 | 2 | 1 |
| Case 44 | 6 | 28,786,884  | 32,216,793  | 2 | 2 | 4 | 0 |
| Case 44 | 6 | 32,217,846  | 32,246,156  | 3 | 2 | 5 | 0 |
| Case 44 | 6 | 32,252,678  | 32,327,781  | 3 | 1 | 4 | 0 |
| Case 44 | 6 | 32,328,403  | 33,957,134  | 2 | 1 | 3 | 0 |
| Case 44 | 6 | 33,960,611  | 35,727,655  | 3 | 2 | 5 | 0 |
| Case 44 | 6 | 35,730,950  | 35,782,386  | 2 | 1 | 3 | 0 |
| Case 44 | 6 | 35,782,525  | 37,761,564  | 3 | 2 | 5 | 0 |
| Case 44 | 6 | 37,767,685  | 38,304,882  | 4 | 2 | 6 | 0 |
| Case 44 | 6 | 38,305,770  | 44,525,989  | 3 | 2 | 5 | 0 |
| Case 44 | 6 | 44,526,440  | 46,588,421  | 2 | 1 | 3 | 0 |
| Case 44 | 6 | 46,588,968  | 46,594,121  | 3 | 2 | 5 | 0 |
| Case 44 | 6 | 46,596,286  | 56,722,235  | 2 | 1 | 3 | 0 |
| Case 44 | 6 | 56,726,819  | 57,161,932  | 3 | 2 | 5 | 0 |
| Case 44 | 6 | 57,162,703  | 58,752,089  | 2 | 2 | 4 | 0 |
| Case 44 | 6 | 61,891,118  | 63,358,826  | 2 | 2 | 4 | 0 |
| Case 44 | 6 | 63,375,122  | 63,733,495  | 3 | 2 | 5 | 0 |
| Case 44 | 6 | 63,746,291  | 75,319,716  | 2 | 2 | 4 | 0 |
| Case 44 | 6 | 75,320,927  | 75,750,133  | 3 | 2 | 5 | 0 |
| Case 44 | 6 | 75,752,445  | 80,016,681  | 2 | 2 | 4 | 0 |
| Case 44 | 6 | 80,018,505  | 91,395,059  | 3 | 0 | 3 | 1 |
| Case 44 | 6 | 91,396,592  | 106,145,993 | 2 | 0 | 2 | 1 |
| Case 44 | 6 | 106,147,299 | 129,799,682 | 3 | 0 | 3 | 1 |
| Case 44 | 6 | 129,802,475 | 129,835,814 | 2 | 0 | 2 | 1 |
| Case 44 | 6 | 129,836,336 | 132,611,762 | 3 | 0 | 3 | 1 |
| Case 44 | 6 | 132,617,072 | 133,126,220 | 2 | 2 | 4 | 0 |
| Case 44 | 6 | 133,132,500 | 133,396,241 | 2 | 1 | 3 | 0 |
| Case 44 | 6 | 133,396,480 | 170,980,171 | 2 | 2 | 4 | 0 |
| Case 44 | 7 | 44,935      | 12,972,070  | 2 | 2 | 4 | 0 |
| Case 44 | 7 | 12,972,239  | 13,287,995  | 3 | 2 | 5 | 0 |
| Case 44 | 7 | 13,289,250  | 16,822,753  | 2 | 2 | 4 | 0 |
| Case 44 | 7 | 16,823,169  | 18,336,292  | 3 | 2 | 5 | 0 |
| Case 44 | 7 | 18,338,350  | 18,391,557  | 3 | 3 | 6 | 0 |
| Case 44 | 7 | 18,392,320  | 39,930,518  | 2 | 2 | 4 | 0 |
| Case 44 | 7 | 39,939,960  | 40,525,965  | 4 | 2 | 6 | 0 |
| Case 44 | 7 | 40,535,883  | 45,283,169  | 3 | 2 | 5 | 0 |
| Case 44 | 7 | 45,287,160  | 47,316,586  | 4 | 2 | 6 | 0 |
| Case 44 | 7 | 47,317,046  | 58,019,061  | 3 | 2 | 5 | 0 |
| Case 44 | 7 | 61,056,053  | 61,138,655  | 3 | 2 | 5 | 0 |
| Case 44 | 7 | 61,747,794  | 62,154,874  | 2 | 1 | 3 | 0 |
| Case 44 | 7 | 62,159,926  | 62,479,327  | 1 | 1 | 2 | 0 |
| Case 44 | 7 | 62,510,311  | 91,584,356  | 2 | 2 | 4 | 0 |
| Case 44 | 7 | 91,588,036  | 92,332,375  | 3 | 2 | 5 | 0 |



|         |    |             |             |    |   |    |   |
|---------|----|-------------|-------------|----|---|----|---|
| Case 44 | 7  | 92,333,408  | 125,853,688 | 2  | 2 | 4  | 0 |
| Case 44 | 7  | 125,866,526 | 126,028,624 | 3  | 2 | 5  | 0 |
| Case 44 | 7  | 126,037,315 | 127,175,236 | 2  | 2 | 4  | 0 |
| Case 44 | 7  | 127,178,162 | 128,366,896 | 3  | 0 | 3  | 1 |
| Case 44 | 7  | 128,368,205 | 128,511,731 | 2  | 0 | 2  | 1 |
| Case 44 | 7  | 128,515,846 | 136,797,182 | 2  | 2 | 4  | 0 |
| Case 44 | 7  | 136,798,166 | 136,915,059 | 3  | 2 | 5  | 0 |
| Case 44 | 7  | 136,915,408 | 150,447,249 | 2  | 2 | 4  | 0 |
| Case 44 | 7  | 150,455,295 | 150,483,512 | 3  | 3 | 6  | 0 |
| Case 44 | 7  | 150,485,401 | 154,149,688 | 2  | 2 | 4  | 0 |
| Case 44 | 7  | 154,150,550 | 154,458,446 | 4  | 2 | 6  | 0 |
| Case 44 | 7  | 154,461,112 | 156,111,133 | 3  | 2 | 5  | 0 |
| Case 44 | 7  | 156,113,163 | 156,450,897 | 5  | 2 | 7  | 0 |
| Case 44 | 7  | 156,451,155 | 158,524,763 | 3  | 0 | 3  | 1 |
| Case 44 | 7  | 158,524,830 | 158,526,880 | 4  | 0 | 4  | 1 |
| Case 44 | 7  | 158,527,605 | 159,119,486 | 3  | 0 | 3  | 1 |
| Case 44 | 8  | 164,984     | 221,671     | 3  | 0 | 3  | 1 |
| Case 44 | 8  | 221,922     | 17,674,988  | 2  | 0 | 2  | 1 |
| Case 44 | 8  | 17,681,402  | 17,753,872  | 5  | 0 | 5  | 1 |
| Case 44 | 8  | 17,754,461  | 17,804,719  | 4  | 0 | 4  | 1 |
| Case 44 | 8  | 17,804,768  | 43,791,691  | 3  | 0 | 3  | 1 |
| Case 44 | 8  | 46,886,735  | 47,042,399  | 3  | 0 | 3  | 1 |
| Case 44 | 8  | 47,060,602  | 100,168,015 | 4  | 2 | 6  | 0 |
| Case 44 | 8  | 100,180,871 | 100,832,259 | 2  | 1 | 3  | 0 |
| Case 44 | 8  | 100,833,621 | 100,861,113 | 2  | 0 | 2  | 1 |
| Case 44 | 8  | 100,865,836 | 105,351,943 | 4  | 2 | 6  | 0 |
| Case 44 | 8  | 105,351,998 | 105,423,221 | 3  | 2 | 5  | 0 |
| Case 44 | 8  | 105,423,590 | 133,033,089 | 4  | 2 | 6  | 0 |
| Case 44 | 8  | 133,034,922 | 140,789,847 | 3  | 2 | 5  | 0 |
| Case 44 | 8  | 140,792,787 | 146,194,119 | 4  | 2 | 6  | 0 |
| Case 44 | 8  | 146,200,945 | 146,262,671 | 5  | 2 | 7  | 0 |
| Case 44 | 8  | 146,264,325 | 146,293,414 | 3  | 2 | 5  | 0 |
| Case 44 | 9  | 46,587      | 839,141     | 0  | 0 | 0  | 0 |
| Case 44 | 9  | 840,501     | 7,124,297   | 3  | 0 | 3  | 1 |
| Case 44 | 9  | 7,124,815   | 12,366,893  | 2  | 0 | 2  | 1 |
| Case 44 | 9  | 12,366,992  | 28,412,375  | 3  | 0 | 3  | 1 |
| Case 44 | 9  | 28,412,544  | 30,698,142  | 2  | 0 | 2  | 1 |
| Case 44 | 9  | 30,713,637  | 31,116,343  | 6  | 2 | 8  | 0 |
| Case 44 | 9  | 31,116,823  | 31,602,656  | 5  | 2 | 7  | 0 |
| Case 44 | 9  | 31,608,609  | 34,587,485  | 2  | 2 | 4  | 0 |
| Case 44 | 9  | 34,592,699  | 38,746,404  | 3  | 0 | 3  | 1 |
| Case 44 | 9  | 38,747,064  | 46,944,322  | 2  | 1 | 3  | 0 |
| Case 44 | 9  | 65,629,772  | 114,449,970 | 3  | 2 | 5  | 0 |
| Case 44 | 9  | 114,453,006 | 114,546,234 | 4  | 3 | 7  | 0 |
| Case 44 | 9  | 114,557,475 | 141,066,491 | 3  | 2 | 5  | 0 |
| Case 44 | 10 | 98,087      | 1,018,585   | 4  | 2 | 6  | 0 |
| Case 44 | 10 | 1,032,568   | 32,067,305  | 2  | 2 | 4  | 0 |
| Case 44 | 10 | 32,070,331  | 33,255,172  | 3  | 2 | 5  | 0 |
| Case 44 | 10 | 33,260,699  | 39,070,516  | 2  | 2 | 4  | 0 |
| Case 44 | 10 | 39,088,829  | 39,097,912  | 2  | 0 | 2  | 1 |
| Case 44 | 10 | 42,436,301  | 61,087,914  | 2  | 0 | 2  | 1 |
| Case 44 | 10 | 61,091,607  | 83,091,584  | 3  | 0 | 3  | 1 |
| Case 44 | 10 | 83,093,068  | 87,767,044  | 2  | 0 | 2  | 1 |
| Case 44 | 10 | 87,768,614  | 91,571,200  | 3  | 0 | 3  | 1 |
| Case 44 | 10 | 91,573,992  | 93,176,418  | 2  | 0 | 2  | 1 |
| Case 44 | 10 | 93,177,933  | 106,842,041 | 3  | 0 | 3  | 1 |
| Case 44 | 10 | 106,845,381 | 111,224,826 | 2  | 0 | 2  | 1 |
| Case 44 | 10 | 111,236,512 | 122,374,787 | 3  | 0 | 3  | 1 |
| Case 44 | 10 | 122,383,804 | 123,491,643 | 13 | 0 | 13 | 1 |
| Case 44 | 10 | 123,494,644 | 123,795,655 | 15 | 0 | 15 | 1 |
| Case 44 | 10 | 123,796,743 | 124,258,081 | 10 | 0 | 10 | 1 |

|         |    |             |             |   |   |   |   |
|---------|----|-------------|-------------|---|---|---|---|
| Case 44 | 10 | 124,259,062 | 124,533,058 | 8 | 0 | 8 | 1 |
| Case 44 | 10 | 124,536,352 | 125,151,935 | 6 | 1 | 7 | 0 |
| Case 44 | 10 | 125,157,288 | 126,419,153 | 7 | 1 | 8 | 0 |
| Case 44 | 10 | 126,438,019 | 135,477,883 | 3 | 0 | 3 | 1 |
| Case 44 | 11 | 193,146     | 14,685,078  | 2 | 2 | 4 | 0 |
| Case 44 | 11 | 14,690,192  | 14,855,923  | 3 | 2 | 5 | 0 |
| Case 44 | 11 | 14,860,270  | 16,015,766  | 2 | 2 | 4 | 0 |
| Case 44 | 11 | 16,022,866  | 17,062,454  | 3 | 0 | 3 | 1 |
| Case 44 | 11 | 17,069,800  | 20,424,519  | 2 | 2 | 4 | 0 |
| Case 44 | 11 | 20,429,454  | 20,490,704  | 3 | 3 | 6 | 0 |
| Case 44 | 11 | 20,495,405  | 32,554,805  | 2 | 2 | 4 | 0 |
| Case 44 | 11 | 32,571,594  | 33,291,462  | 3 | 2 | 5 | 0 |
| Case 44 | 11 | 33,302,060  | 49,458,055  | 2 | 2 | 4 | 0 |
| Case 44 | 11 | 49,464,833  | 49,836,893  | 3 | 2 | 5 | 0 |
| Case 44 | 11 | 49,845,560  | 51,591,253  | 2 | 2 | 4 | 0 |
| Case 44 | 11 | 54,794,237  | 95,937,792  | 2 | 2 | 4 | 0 |
| Case 44 | 11 | 95,938,154  | 97,352,205  | 3 | 2 | 5 | 0 |
| Case 44 | 11 | 97,356,569  | 128,844,481 | 2 | 2 | 4 | 0 |
| Case 44 | 11 | 128,844,513 | 129,165,818 | 3 | 2 | 5 | 0 |
| Case 44 | 11 | 129,167,003 | 134,934,063 | 2 | 2 | 4 | 0 |
| Case 44 | 12 | 191,619     | 21,473,072  | 3 | 0 | 3 | 1 |
| Case 44 | 12 | 21,473,803  | 21,482,399  | 2 | 0 | 2 | 1 |
| Case 44 | 12 | 21,482,481  | 34,245,756  | 3 | 0 | 3 | 1 |
| Case 44 | 12 | 34,263,134  | 34,819,926  | 2 | 0 | 2 | 1 |
| Case 44 | 12 | 34,826,574  | 34,853,011  | 2 | 1 | 3 | 0 |
| Case 44 | 12 | 37,876,400  | 51,089,718  | 2 | 1 | 3 | 0 |
| Case 44 | 12 | 51,097,971  | 51,966,424  | 3 | 2 | 5 | 0 |
| Case 44 | 12 | 51,966,950  | 52,115,545  | 4 | 2 | 6 | 0 |
| Case 44 | 12 | 52,139,786  | 54,203,866  | 3 | 2 | 5 | 0 |
| Case 44 | 12 | 54,206,785  | 54,357,198  | 2 | 1 | 3 | 0 |
| Case 44 | 12 | 54,360,429  | 59,546,012  | 3 | 2 | 5 | 0 |
| Case 44 | 12 | 59,550,108  | 61,664,878  | 5 | 2 | 7 | 0 |
| Case 44 | 12 | 61,672,165  | 61,802,276  | 2 | 1 | 3 | 0 |
| Case 44 | 12 | 61,815,188  | 62,846,446  | 7 | 2 | 9 | 0 |
| Case 44 | 12 | 62,851,547  | 67,169,731  | 5 | 2 | 7 | 0 |
| Case 44 | 12 | 67,170,147  | 68,706,883  | 6 | 1 | 7 | 0 |
| Case 44 | 12 | 68,707,287  | 69,411,195  | 5 | 2 | 7 | 0 |
| Case 44 | 12 | 69,417,521  | 69,963,871  | 3 | 2 | 5 | 0 |
| Case 44 | 12 | 69,964,199  | 70,443,484  | 4 | 2 | 6 | 0 |
| Case 44 | 12 | 70,443,928  | 72,977,698  | 3 | 2 | 5 | 0 |
| Case 44 | 12 | 72,993,694  | 74,924,511  | 5 | 2 | 7 | 0 |
| Case 44 | 12 | 74,924,819  | 75,823,983  | 3 | 1 | 4 | 0 |
| Case 44 | 12 | 75,841,767  | 90,955,971  | 2 | 1 | 3 | 0 |
| Case 44 | 12 | 90,958,980  | 91,293,264  | 3 | 1 | 4 | 0 |
| Case 44 | 12 | 91,296,986  | 105,144,974 | 2 | 1 | 3 | 0 |
| Case 44 | 12 | 105,147,993 | 106,048,984 | 3 | 1 | 4 | 0 |
| Case 44 | 12 | 106,051,522 | 112,666,518 | 2 | 1 | 3 | 0 |
| Case 44 | 12 | 112,667,572 | 122,963,550 | 2 | 2 | 4 | 0 |
| Case 44 | 12 | 122,966,373 | 123,124,702 | 3 | 2 | 5 | 0 |
| Case 44 | 12 | 123,131,824 | 133,810,935 | 2 | 2 | 4 | 0 |
| Case 44 | 13 | 19,058,717  | 21,048,924  | 4 | 0 | 4 | 1 |
| Case 44 | 13 | 21,050,575  | 21,483,113  | 6 | 0 | 6 | 1 |
| Case 44 | 13 | 21,483,892  | 24,374,905  | 4 | 0 | 4 | 1 |
| Case 44 | 13 | 24,379,138  | 24,430,875  | 5 | 0 | 5 | 1 |
| Case 44 | 13 | 24,431,745  | 24,521,485  | 6 | 0 | 6 | 1 |
| Case 44 | 13 | 24,524,626  | 24,931,981  | 5 | 0 | 5 | 1 |
| Case 44 | 13 | 24,936,847  | 30,606,408  | 4 | 0 | 4 | 1 |
| Case 44 | 13 | 30,606,905  | 30,879,318  | 5 | 0 | 5 | 1 |
| Case 44 | 13 | 30,884,562  | 35,862,493  | 4 | 0 | 4 | 1 |
| Case 44 | 13 | 35,867,044  | 35,933,714  | 5 | 0 | 5 | 1 |
| Case 44 | 13 | 35,950,999  | 47,841,615  | 4 | 0 | 4 | 1 |

|         |    |             |             |   |   |    |   |
|---------|----|-------------|-------------|---|---|----|---|
| Case 44 | 13 | 47,843,377  | 104,373,617 | 5 | 0 | 5  | 1 |
| Case 44 | 13 | 104,375,959 | 104,609,779 | 6 | 0 | 6  | 1 |
| Case 44 | 13 | 104,612,594 | 115,103,529 | 5 | 0 | 5  | 1 |
| Case 44 | 14 | 19,280,733  | 20,626,291  | 3 | 1 | 4  | 0 |
| Case 44 | 14 | 20,637,198  | 20,944,569  | 3 | 2 | 5  | 0 |
| Case 44 | 14 | 20,946,932  | 22,220,569  | 5 | 1 | 6  | 0 |
| Case 44 | 14 | 22,221,211  | 22,526,881  | 7 | 2 | 9  | 0 |
| Case 44 | 14 | 22,528,345  | 22,851,273  | 9 | 2 | 11 | 0 |
| Case 44 | 14 | 22,851,830  | 22,972,986  | 7 | 2 | 9  | 0 |
| Case 44 | 14 | 22,974,256  | 23,873,092  | 6 | 1 | 7  | 0 |
| Case 44 | 14 | 23,873,927  | 48,252,682  | 2 | 1 | 3  | 0 |
| Case 44 | 14 | 48,264,050  | 51,903,109  | 3 | 1 | 4  | 0 |
| Case 44 | 14 | 51,904,869  | 99,751,588  | 2 | 1 | 3  | 0 |
| Case 44 | 14 | 99,751,937  | 100,080,335 | 3 | 0 | 3  | 1 |
| Case 44 | 14 | 100,082,888 | 101,071,722 | 2 | 2 | 4  | 0 |
| Case 44 | 14 | 101,094,177 | 102,183,359 | 3 | 2 | 5  | 0 |
| Case 44 | 14 | 102,198,596 | 102,713,581 | 3 | 0 | 3  | 1 |
| Case 44 | 14 | 102,717,231 | 107,287,663 | 2 | 1 | 3  | 0 |
| Case 44 | 15 | 20,034,919  | 22,369,360  | 1 | 0 | 1  | 0 |
| Case 44 | 15 | 22,382,854  | 29,454,634  | 2 | 0 | 2  | 1 |
| Case 44 | 15 | 29,467,605  | 42,229,041  | 3 | 0 | 3  | 1 |
| Case 44 | 15 | 42,230,600  | 43,097,652  | 5 | 0 | 5  | 1 |
| Case 44 | 15 | 43,101,366  | 43,452,904  | 6 | 0 | 6  | 1 |
| Case 44 | 15 | 43,461,831  | 45,847,921  | 5 | 0 | 5  | 1 |
| Case 44 | 15 | 45,872,269  | 50,048,674  | 2 | 0 | 2  | 1 |
| Case 44 | 15 | 50,050,824  | 63,722,915  | 3 | 0 | 3  | 1 |
| Case 44 | 15 | 63,733,263  | 86,013,601  | 4 | 0 | 4  | 1 |
| Case 44 | 15 | 86,016,573  | 89,513,031  | 3 | 0 | 3  | 1 |
| Case 44 | 15 | 89,532,776  | 95,690,709  | 4 | 0 | 4  | 1 |
| Case 44 | 15 | 95,700,505  | 100,865,297 | 3 | 0 | 3  | 1 |
| Case 44 | 15 | 100,866,433 | 101,888,311 | 4 | 0 | 4  | 1 |
| Case 44 | 15 | 101,889,555 | 102,461,162 | 3 | 0 | 3  | 1 |
| Case 44 | 16 | 88,165      | 35,285,582  | 3 | 0 | 3  | 1 |
| Case 44 | 16 | 46,450,037  | 61,594,610  | 3 | 0 | 3  | 1 |
| Case 44 | 16 | 61,597,859  | 65,299,609  | 2 | 0 | 2  | 1 |
| Case 44 | 16 | 65,302,294  | 90,274,695  | 3 | 0 | 3  | 1 |
| Case 44 | 17 | 11,885      | 14,292,908  | 3 | 0 | 3  | 1 |
| Case 44 | 17 | 14,294,021  | 17,788,344  | 4 | 0 | 4  | 1 |
| Case 44 | 17 | 17,803,003  | 18,917,324  | 5 | 0 | 5  | 1 |
| Case 44 | 17 | 18,917,915  | 21,831,307  | 3 | 0 | 3  | 1 |
| Case 44 | 17 | 21,835,272  | 22,242,355  | 5 | 0 | 5  | 1 |
| Case 44 | 17 | 25,268,142  | 25,268,142  | 5 | 0 | 5  | 1 |
| Case 44 | 17 | 25,295,032  | 29,047,285  | 2 | 1 | 3  | 0 |
| Case 44 | 17 | 29,060,766  | 48,119,457  | 3 | 2 | 5  | 0 |
| Case 44 | 17 | 48,122,322  | 48,849,868  | 4 | 1 | 5  | 0 |
| Case 44 | 17 | 48,851,094  | 63,914,750  | 3 | 2 | 5  | 0 |
| Case 44 | 17 | 63,923,713  | 64,197,405  | 4 | 3 | 7  | 0 |
| Case 44 | 17 | 64,200,241  | 81,060,040  | 3 | 2 | 5  | 0 |
| Case 44 | 18 | 87,505      | 1,063,447   | 5 | 0 | 5  | 1 |
| Case 44 | 18 | 1,065,350   | 2,694,636   | 6 | 0 | 6  | 1 |
| Case 44 | 18 | 2,698,023   | 2,817,052   | 8 | 0 | 8  | 1 |
| Case 44 | 18 | 2,819,761   | 5,025,995   | 6 | 0 | 6  | 1 |
| Case 44 | 18 | 5,026,100   | 9,117,899   | 5 | 0 | 5  | 1 |
| Case 44 | 18 | 9,122,532   | 9,357,576   | 7 | 0 | 7  | 1 |
| Case 44 | 18 | 9,360,013   | 14,903,483  | 6 | 0 | 6  | 1 |
| Case 44 | 18 | 14,914,854  | 15,375,878  | 5 | 0 | 5  | 1 |
| Case 44 | 18 | 18,520,354  | 19,475,555  | 5 | 0 | 5  | 1 |
| Case 44 | 18 | 19,480,017  | 30,246,217  | 4 | 0 | 4  | 1 |
| Case 44 | 18 | 30,249,433  | 31,718,525  | 0 | 0 | 0  | 0 |
| Case 44 | 18 | 31,738,649  | 59,731,955  | 4 | 0 | 4  | 1 |
| Case 44 | 18 | 59,734,744  | 59,997,434  | 5 | 0 | 5  | 1 |

|         |    |             |             |   |   |   |   |
|---------|----|-------------|-------------|---|---|---|---|
| Case 44 | 18 | 60,000,379  | 78,015,180  | 4 | 0 | 4 | 1 |
| Case 44 | 19 | 260,912     | 8,636,109   | 3 | 0 | 3 | 1 |
| Case 44 | 19 | 8,642,160   | 8,789,484   | 2 | 0 | 2 | 1 |
| Case 44 | 19 | 8,789,773   | 20,209,589  | 3 | 0 | 3 | 1 |
| Case 44 | 19 | 20,211,540  | 24,629,285  | 2 | 0 | 2 | 1 |
| Case 44 | 19 | 27,732,159  | 28,385,923  | 2 | 0 | 2 | 1 |
| Case 44 | 19 | 28,388,807  | 28,643,967  | 3 | 0 | 3 | 1 |
| Case 44 | 19 | 28,647,589  | 28,822,169  | 5 | 0 | 5 | 1 |
| Case 44 | 19 | 28,832,269  | 29,290,513  | 2 | 0 | 2 | 1 |
| Case 44 | 19 | 29,292,414  | 30,882,535  | 5 | 0 | 5 | 1 |
| Case 44 | 19 | 30,884,407  | 31,940,087  | 2 | 0 | 2 | 1 |
| Case 44 | 19 | 31,949,453  | 49,663,789  | 3 | 0 | 3 | 1 |
| Case 44 | 19 | 49,667,351  | 59,097,160  | 2 | 2 | 4 | 0 |
| Case 44 | 20 | 63,244      | 602,622     | 3 | 0 | 3 | 1 |
| Case 44 | 20 | 603,620     | 3,915,064   | 5 | 1 | 6 | 0 |
| Case 44 | 20 | 3,921,964   | 5,965,549   | 6 | 1 | 7 | 0 |
| Case 44 | 20 | 5,966,578   | 7,601,460   | 5 | 2 | 7 | 0 |
| Case 44 | 20 | 7,605,418   | 8,454,206   | 4 | 2 | 6 | 0 |
| Case 44 | 20 | 8,461,826   | 13,869,131  | 5 | 2 | 7 | 0 |
| Case 44 | 20 | 13,870,939  | 14,576,448  | 2 | 2 | 4 | 0 |
| Case 44 | 20 | 14,579,703  | 14,847,907  | 3 | 0 | 3 | 1 |
| Case 44 | 20 | 14,853,050  | 26,293,985  | 2 | 2 | 4 | 0 |
| Case 44 | 20 | 29,425,357  | 45,941,713  | 2 | 2 | 4 | 0 |
| Case 44 | 20 | 45,947,845  | 50,383,679  | 3 | 2 | 5 | 0 |
| Case 44 | 20 | 50,395,283  | 51,509,864  | 4 | 2 | 6 | 0 |
| Case 44 | 20 | 51,514,621  | 55,991,823  | 4 | 0 | 4 | 1 |
| Case 44 | 20 | 55,997,468  | 60,964,301  | 3 | 2 | 5 | 0 |
| Case 44 | 20 | 60,964,629  | 62,126,299  | 4 | 2 | 6 | 0 |
| Case 44 | 20 | 62,126,745  | 62,948,788  | 3 | 2 | 5 | 0 |
| Case 44 | 21 | 10,827,533  | 10,971,337  | 3 | 0 | 3 | 1 |
| Case 44 | 21 | 14,368,320  | 20,092,485  | 3 | 0 | 3 | 1 |
| Case 44 | 21 | 20,099,787  | 22,563,193  | 2 | 0 | 2 | 1 |
| Case 44 | 21 | 22,572,304  | 24,936,629  | 2 | 1 | 3 | 0 |
| Case 44 | 21 | 24,942,410  | 25,858,886  | 2 | 0 | 2 | 1 |
| Case 44 | 21 | 25,865,342  | 35,782,033  | 2 | 1 | 3 | 0 |
| Case 44 | 21 | 35,783,219  | 38,390,444  | 3 | 0 | 3 | 1 |
| Case 44 | 21 | 38,390,716  | 40,157,281  | 2 | 1 | 3 | 0 |
| Case 44 | 21 | 40,169,139  | 41,986,158  | 3 | 0 | 3 | 1 |
| Case 44 | 21 | 41,993,707  | 42,852,320  | 2 | 1 | 3 | 0 |
| Case 44 | 21 | 42,852,497  | 43,060,084  | 4 | 1 | 5 | 0 |
| Case 44 | 21 | 43,060,391  | 43,944,231  | 2 | 1 | 3 | 0 |
| Case 44 | 21 | 43,950,304  | 47,308,623  | 3 | 0 | 3 | 1 |
| Case 44 | 21 | 47,312,800  | 48,100,155  | 2 | 1 | 3 | 0 |
| Case 44 | 22 | 16,114,244  | 51,195,728  | 3 | 0 | 3 | 1 |
| Case 44 | X  | 2,700,157   | 58,488,110  | 3 | 0 | 3 | 1 |
| Case 44 | X  | 61,694,576  | 73,050,564  | 3 | 0 | 3 | 1 |
| Case 44 | X  | 73,076,337  | 154,898,561 | 2 | 1 | 3 | 0 |
| Case 45 | 1  | 82,154      | 3,789,061   | 2 | 2 | 4 | 0 |
| Case 45 | 1  | 3,789,087   | 15,334,782  | 3 | 2 | 5 | 0 |
| Case 45 | 1  | 15,335,548  | 121,346,616 | 2 | 2 | 4 | 0 |
| Case 45 | 1  | 142,649,718 | 157,542,162 | 3 | 2 | 5 | 0 |
| Case 45 | 1  | 157,542,216 | 157,634,415 | 2 | 2 | 4 | 0 |
| Case 45 | 1  | 157,637,964 | 240,778,731 | 3 | 2 | 5 | 0 |
| Case 45 | 1  | 240,783,716 | 241,183,893 | 2 | 2 | 4 | 0 |
| Case 45 | 1  | 241,185,048 | 247,815,357 | 3 | 2 | 5 | 0 |
| Case 45 | 1  | 247,828,797 | 247,865,773 | 2 | 2 | 4 | 0 |
| Case 45 | 1  | 247,868,113 | 249,218,992 | 3 | 2 | 5 | 0 |
| Case 45 | 2  | 18,674      | 92,081,640  | 3 | 2 | 5 | 0 |
| Case 45 | 2  | 95,429,424  | 131,520,828 | 3 | 2 | 5 | 0 |
| Case 45 | 2  | 131,520,942 | 133,034,154 | 2 | 2 | 4 | 0 |
| Case 45 | 2  | 133,038,729 | 243,048,760 | 3 | 2 | 5 | 0 |

|         |    |             |             |   |   |   |   |
|---------|----|-------------|-------------|---|---|---|---|
| Case 45 | 3  | 61,495      | 1,197,281   | 2 | 2 | 4 | 0 |
| Case 45 | 3  | 1,202,295   | 1,276,092   | 3 | 2 | 5 | 0 |
| Case 45 | 3  | 1,286,804   | 20,554,738  | 2 | 2 | 4 | 0 |
| Case 45 | 3  | 20,559,052  | 25,654,677  | 3 | 2 | 5 | 0 |
| Case 45 | 3  | 25,656,775  | 29,993,977  | 2 | 2 | 4 | 0 |
| Case 45 | 3  | 29,995,340  | 42,366,706  | 3 | 2 | 5 | 0 |
| Case 45 | 3  | 42,371,742  | 57,695,201  | 2 | 2 | 4 | 0 |
| Case 45 | 3  | 57,702,947  | 59,924,843  | 3 | 2 | 5 | 0 |
| Case 45 | 3  | 59,925,591  | 60,574,546  | 2 | 2 | 4 | 0 |
| Case 45 | 3  | 60,576,324  | 74,344,356  | 3 | 2 | 5 | 0 |
| Case 45 | 3  | 74,345,173  | 79,785,218  | 2 | 2 | 4 | 0 |
| Case 45 | 3  | 79,789,314  | 90,442,925  | 3 | 2 | 5 | 0 |
| Case 45 | 3  | 93,537,290  | 127,094,785 | 3 | 2 | 5 | 0 |
| Case 45 | 3  | 127,097,277 | 130,255,483 | 2 | 2 | 4 | 0 |
| Case 45 | 3  | 130,255,698 | 175,096,546 | 3 | 2 | 5 | 0 |
| Case 45 | 3  | 175,102,338 | 175,296,589 | 2 | 2 | 4 | 0 |
| Case 45 | 3  | 175,326,982 | 197,838,262 | 3 | 2 | 5 | 0 |
| Case 45 | 4  | 71,566      | 49,620,898  | 2 | 2 | 4 | 0 |
| Case 45 | 4  | 52,697,856  | 93,987,251  | 2 | 2 | 4 | 0 |
| Case 45 | 4  | 93,989,892  | 146,167,657 | 3 | 2 | 5 | 0 |
| Case 45 | 4  | 146,173,197 | 190,963,766 | 2 | 2 | 4 | 0 |
| Case 45 | 5  | 38,139      | 8,867,419   | 2 | 2 | 4 | 0 |
| Case 45 | 5  | 8,870,267   | 17,381,321  | 3 | 2 | 5 | 0 |
| Case 45 | 5  | 17,391,377  | 19,158,050  | 2 | 2 | 4 | 0 |
| Case 45 | 5  | 19,160,015  | 45,841,630  | 3 | 2 | 5 | 0 |
| Case 45 | 5  | 45,874,923  | 46,399,093  | 2 | 2 | 4 | 0 |
| Case 45 | 5  | 49,457,282  | 49,492,838  | 2 | 2 | 4 | 0 |
| Case 45 | 5  | 49,522,346  | 83,508,667  | 3 | 2 | 5 | 0 |
| Case 45 | 5  | 83,511,806  | 129,648,250 | 2 | 2 | 4 | 0 |
| Case 45 | 5  | 129,651,210 | 161,154,713 | 3 | 2 | 5 | 0 |
| Case 45 | 5  | 161,172,541 | 166,417,375 | 2 | 2 | 4 | 0 |
| Case 45 | 5  | 166,423,776 | 180,693,127 | 3 | 2 | 5 | 0 |
| Case 45 | 6  | 108,666     | 1,620,037   | 3 | 2 | 5 | 0 |
| Case 45 | 6  | 1,621,404   | 2,052,811   | 2 | 2 | 4 | 0 |
| Case 45 | 6  | 2,059,110   | 30,196,980  | 3 | 2 | 5 | 0 |
| Case 45 | 6  | 30,199,016  | 30,209,062  | 2 | 2 | 4 | 0 |
| Case 45 | 6  | 30,209,493  | 58,333,290  | 3 | 2 | 5 | 0 |
| Case 45 | 6  | 58,344,955  | 58,752,089  | 2 | 2 | 4 | 0 |
| Case 45 | 6  | 61,891,118  | 170,980,171 | 2 | 2 | 4 | 0 |
| Case 45 | 7  | 44,935      | 3,018,962   | 2 | 2 | 4 | 0 |
| Case 45 | 7  | 3,020,375   | 38,298,285  | 3 | 2 | 5 | 0 |
| Case 45 | 7  | 38,313,248  | 38,356,545  | 3 | 3 | 6 | 0 |
| Case 45 | 7  | 38,357,075  | 48,457,344  | 3 | 2 | 5 | 0 |
| Case 45 | 7  | 48,457,425  | 48,479,620  | 2 | 2 | 4 | 0 |
| Case 45 | 7  | 48,479,836  | 58,019,061  | 3 | 2 | 5 | 0 |
| Case 45 | 7  | 61,056,053  | 71,000,614  | 3 | 2 | 5 | 0 |
| Case 45 | 7  | 71,006,669  | 86,633,357  | 2 | 2 | 4 | 0 |
| Case 45 | 7  | 86,639,826  | 89,474,743  | 3 | 2 | 5 | 0 |
| Case 45 | 7  | 89,482,839  | 91,922,502  | 2 | 2 | 4 | 0 |
| Case 45 | 7  | 91,925,256  | 100,211,556 | 3 | 2 | 5 | 0 |
| Case 45 | 7  | 100,212,254 | 159,119,486 | 2 | 2 | 4 | 0 |
| Case 45 | 8  | 164,984     | 43,791,691  | 3 | 2 | 5 | 0 |
| Case 45 | 8  | 46,886,735  | 144,364,579 | 3 | 2 | 5 | 0 |
| Case 45 | 8  | 144,376,881 | 146,293,414 | 2 | 2 | 4 | 0 |
| Case 45 | 9  | 46,587      | 46,944,322  | 2 | 2 | 4 | 0 |
| Case 45 | 9  | 65,629,772  | 115,821,485 | 2 | 2 | 4 | 0 |
| Case 45 | 9  | 115,852,715 | 115,874,261 | 3 | 2 | 5 | 0 |
| Case 45 | 9  | 115,881,664 | 141,066,491 | 2 | 2 | 4 | 0 |
| Case 45 | 10 | 98,087      | 32,684,126  | 2 | 2 | 4 | 0 |
| Case 45 | 10 | 32,684,427  | 38,154,415  | 3 | 2 | 5 | 0 |
| Case 45 | 10 | 38,193,129  | 39,097,912  | 2 | 2 | 4 | 0 |

|         |    |             |             |   |   |   |   |
|---------|----|-------------|-------------|---|---|---|---|
| Case 45 | 10 | 42,436,301  | 43,262,368  | 2 | 2 | 4 | 0 |
| Case 45 | 10 | 43,264,591  | 55,949,937  | 3 | 2 | 5 | 0 |
| Case 45 | 10 | 55,951,332  | 83,756,102  | 2 | 2 | 4 | 0 |
| Case 45 | 10 | 83,757,021  | 124,512,299 | 3 | 2 | 5 | 0 |
| Case 45 | 10 | 124,515,295 | 127,720,923 | 2 | 2 | 4 | 0 |
| Case 45 | 10 | 127,722,122 | 128,027,301 | 3 | 2 | 5 | 0 |
| Case 45 | 10 | 128,030,262 | 135,477,883 | 2 | 2 | 4 | 0 |
| Case 45 | 11 | 193,146     | 34,981,990  | 2 | 2 | 4 | 0 |
| Case 45 | 11 | 34,982,013  | 49,401,125  | 3 | 2 | 5 | 0 |
| Case 45 | 11 | 49,426,062  | 51,591,253  | 2 | 2 | 4 | 0 |
| Case 45 | 11 | 54,794,237  | 56,113,575  | 2 | 2 | 4 | 0 |
| Case 45 | 11 | 56,113,593  | 57,185,284  | 3 | 2 | 5 | 0 |
| Case 45 | 11 | 57,185,404  | 134,934,063 | 2 | 2 | 4 | 0 |
| Case 45 | 12 | 191,619     | 1,025,863   | 3 | 2 | 5 | 0 |
| Case 45 | 12 | 1,025,869   | 1,121,571   | 2 | 2 | 4 | 0 |
| Case 45 | 12 | 1,133,151   | 33,512,136  | 3 | 2 | 5 | 0 |
| Case 45 | 12 | 33,517,984  | 34,853,011  | 2 | 2 | 4 | 0 |
| Case 45 | 12 | 37,876,400  | 40,653,340  | 2 | 2 | 4 | 0 |
| Case 45 | 12 | 40,653,988  | 131,627,932 | 3 | 2 | 5 | 0 |
| Case 45 | 12 | 131,628,061 | 133,810,935 | 2 | 2 | 4 | 0 |
| Case 45 | 13 | 19,058,717  | 25,235,968  | 2 | 2 | 4 | 0 |
| Case 45 | 13 | 25,236,232  | 90,894,588  | 3 | 2 | 5 | 0 |
| Case 45 | 13 | 90,894,898  | 94,293,676  | 2 | 2 | 4 | 0 |
| Case 45 | 13 | 94,294,144  | 115,103,529 | 3 | 2 | 5 | 0 |
| Case 45 | 14 | 19,280,733  | 65,205,490  | 3 | 2 | 5 | 0 |
| Case 45 | 14 | 65,205,500  | 107,287,663 | 2 | 2 | 4 | 0 |
| Case 45 | 15 | 20,034,919  | 36,618,505  | 2 | 2 | 4 | 0 |
| Case 45 | 15 | 36,625,687  | 37,495,601  | 3 | 2 | 5 | 0 |
| Case 45 | 15 | 37,496,211  | 38,158,758  | 2 | 2 | 4 | 0 |
| Case 45 | 15 | 38,161,914  | 39,062,418  | 3 | 2 | 5 | 0 |
| Case 45 | 15 | 39,063,641  | 57,057,885  | 2 | 2 | 4 | 0 |
| Case 45 | 15 | 57,065,787  | 102,461,162 | 3 | 2 | 5 | 0 |
| Case 45 | 16 | 88,165      | 5,359,353   | 2 | 2 | 4 | 0 |
| Case 45 | 16 | 5,361,883   | 17,841,757  | 3 | 2 | 5 | 0 |
| Case 45 | 16 | 17,843,026  | 35,285,582  | 2 | 2 | 4 | 0 |
| Case 45 | 16 | 46,450,037  | 56,394,035  | 3 | 2 | 5 | 0 |
| Case 45 | 16 | 56,396,486  | 90,274,695  | 2 | 2 | 4 | 0 |
| Case 45 | 17 | 11,885      | 22,242,355  | 3 | 2 | 5 | 0 |
| Case 45 | 17 | 25,268,142  | 28,182,685  | 3 | 2 | 5 | 0 |
| Case 45 | 17 | 28,183,059  | 29,884,773  | 2 | 2 | 4 | 0 |
| Case 45 | 17 | 29,889,952  | 34,436,708  | 3 | 2 | 5 | 0 |
| Case 45 | 17 | 34,443,811  | 34,466,631  | 4 | 2 | 6 | 0 |
| Case 45 | 17 | 34,468,886  | 51,158,147  | 3 | 2 | 5 | 0 |
| Case 45 | 17 | 51,158,857  | 52,792,525  | 2 | 2 | 4 | 0 |
| Case 45 | 17 | 52,794,475  | 81,060,040  | 3 | 2 | 5 | 0 |
| Case 45 | 18 | 87,505      | 15,375,878  | 3 | 2 | 5 | 0 |
| Case 45 | 18 | 18,520,354  | 23,927,627  | 3 | 2 | 5 | 0 |
| Case 45 | 18 | 23,954,481  | 24,180,689  | 8 | 1 | 9 | 0 |
| Case 45 | 18 | 24,181,134  | 24,452,435  | 7 | 1 | 8 | 0 |
| Case 45 | 18 | 24,453,731  | 24,827,956  | 4 | 2 | 6 | 0 |
| Case 45 | 18 | 24,830,305  | 78,015,180  | 2 | 2 | 4 | 0 |
| Case 45 | 19 | 260,912     | 22,689,387  | 2 | 2 | 4 | 0 |
| Case 45 | 19 | 22,692,172  | 22,826,728  | 3 | 2 | 5 | 0 |
| Case 45 | 19 | 22,834,360  | 24,629,285  | 2 | 2 | 4 | 0 |
| Case 45 | 19 | 27,732,159  | 28,178,423  | 2 | 2 | 4 | 0 |
| Case 45 | 19 | 28,185,193  | 37,484,649  | 3 | 2 | 5 | 0 |
| Case 45 | 19 | 37,487,632  | 37,693,542  | 2 | 2 | 4 | 0 |
| Case 45 | 19 | 37,712,984  | 59,097,160  | 3 | 2 | 5 | 0 |
| Case 45 | 20 | 63,244      | 15,026,818  | 3 | 2 | 5 | 0 |
| Case 45 | 20 | 15,027,713  | 26,293,985  | 2 | 2 | 4 | 0 |
| Case 45 | 20 | 29,425,357  | 29,530,880  | 2 | 2 | 4 | 0 |

|         |    |             |             |   |   |   |   |
|---------|----|-------------|-------------|---|---|---|---|
| Case 45 | 20 | 29,540,629  | 55,586,326  | 3 | 2 | 5 | 0 |
| Case 45 | 20 | 55,590,298  | 62,948,788  | 2 | 2 | 4 | 0 |
| Case 45 | 21 | 10,827,533  | 10,971,337  | 2 | 2 | 4 | 0 |
| Case 45 | 21 | 14,368,320  | 48,100,155  | 2 | 2 | 4 | 0 |
| Case 45 | 22 | 16,114,244  | 19,188,971  | 3 | 2 | 5 | 0 |
| Case 45 | 22 | 19,195,680  | 25,571,301  | 2 | 2 | 4 | 0 |
| Case 45 | 22 | 25,572,748  | 37,261,015  | 3 | 2 | 5 | 0 |
| Case 45 | 22 | 37,261,097  | 51,195,728  | 2 | 2 | 4 | 0 |
| Case 45 | X  | 2,700,157   | 58,488,110  | 3 | 2 | 5 | 0 |
| Case 45 | X  | 61,694,576  | 154,898,561 | 3 | 2 | 5 | 0 |
| Case 47 | 1  | 82,154      | 7,955,894   | 1 | 1 | 2 | 0 |
| Case 47 | 1  | 7,961,206   | 8,177,028   | 1 | 0 | 1 | 0 |
| Case 47 | 1  | 8,177,564   | 8,274,807   | 2 | 0 | 2 | 1 |
| Case 47 | 1  | 8,278,899   | 121,346,616 | 1 | 1 | 2 | 0 |
| Case 47 | 1  | 142,649,718 | 249,218,992 | 1 | 1 | 2 | 0 |
| Case 47 | 2  | 18,674      | 59,517,986  | 1 | 1 | 2 | 0 |
| Case 47 | 2  | 59,521,784  | 60,554,216  | 2 | 1 | 3 | 0 |
| Case 47 | 2  | 60,560,560  | 69,139,834  | 1 | 1 | 2 | 0 |
| Case 47 | 2  | 69,140,137  | 69,155,326  | 2 | 1 | 3 | 0 |
| Case 47 | 2  | 69,158,120  | 92,081,640  | 1 | 1 | 2 | 0 |
| Case 47 | 2  | 95,429,424  | 243,048,760 | 1 | 1 | 2 | 0 |
| Case 47 | 3  | 61,495      | 90,442,925  | 1 | 1 | 2 | 0 |
| Case 47 | 3  | 93,537,290  | 197,838,262 | 1 | 1 | 2 | 0 |
| Case 47 | 4  | 71,566      | 49,620,898  | 1 | 1 | 2 | 0 |
| Case 47 | 4  | 52,697,856  | 78,103,458  | 1 | 1 | 2 | 0 |
| Case 47 | 4  | 78,106,123  | 78,344,132  | 2 | 1 | 3 | 0 |
| Case 47 | 4  | 78,346,794  | 190,963,766 | 1 | 1 | 2 | 0 |
| Case 47 | 5  | 38,139      | 46,399,093  | 1 | 1 | 2 | 0 |
| Case 47 | 5  | 49,457,282  | 180,693,127 | 1 | 1 | 2 | 0 |
| Case 47 | 6  | 108,666     | 31,356,574  | 1 | 1 | 2 | 0 |
| Case 47 | 6  | 31,360,255  | 31,453,640  | 0 | 0 | 0 | 0 |
| Case 47 | 6  | 31,456,567  | 32,722,186  | 1 | 1 | 2 | 0 |
| Case 47 | 6  | 32,722,532  | 32,733,931  | 2 | 1 | 3 | 0 |
| Case 47 | 6  | 32,733,987  | 41,658,889  | 1 | 1 | 2 | 0 |
| Case 47 | 6  | 41,664,501  | 41,684,645  | 2 | 1 | 3 | 0 |
| Case 47 | 6  | 41,687,366  | 58,752,089  | 1 | 1 | 2 | 0 |
| Case 47 | 6  | 61,891,118  | 167,397,614 | 1 | 1 | 2 | 0 |
| Case 47 | 6  | 167,398,071 | 167,502,638 | 1 | 0 | 1 | 0 |
| Case 47 | 6  | 167,505,791 | 167,624,079 | 2 | 1 | 3 | 0 |
| Case 47 | 6  | 167,634,544 | 170,980,171 | 1 | 1 | 2 | 0 |
| Case 47 | 7  | 44,935      | 93,811      | 4 | 0 | 4 | 1 |
| Case 47 | 7  | 94,119      | 58,019,061  | 2 | 1 | 3 | 0 |
| Case 47 | 7  | 61,056,053  | 159,119,486 | 2 | 1 | 3 | 0 |
| Case 47 | 8  | 164,984     | 43,791,691  | 3 | 0 | 3 | 1 |
| Case 47 | 8  | 46,886,735  | 146,293,414 | 3 | 0 | 3 | 1 |
| Case 47 | 9  | 46,587      | 46,944,322  | 2 | 1 | 3 | 0 |
| Case 47 | 9  | 65,629,772  | 141,066,491 | 2 | 1 | 3 | 0 |
| Case 47 | 10 | 98,087      | 39,097,912  | 1 | 1 | 2 | 0 |
| Case 47 | 10 | 42,436,301  | 72,832,086  | 1 | 1 | 2 | 0 |
| Case 47 | 10 | 72,847,054  | 75,241,418  | 1 | 0 | 1 | 0 |
| Case 47 | 10 | 75,245,252  | 88,683,223  | 1 | 1 | 2 | 0 |
| Case 47 | 10 | 88,688,336  | 91,469,005  | 1 | 0 | 1 | 0 |
| Case 47 | 10 | 91,469,145  | 91,927,196  | 0 | 0 | 0 | 0 |
| Case 47 | 10 | 91,927,669  | 92,513,249  | 1 | 0 | 1 | 0 |
| Case 47 | 10 | 92,514,739  | 105,453,452 | 1 | 1 | 2 | 0 |
| Case 47 | 10 | 105,460,401 | 105,474,652 | 2 | 1 | 3 | 0 |
| Case 47 | 10 | 105,477,163 | 135,477,883 | 1 | 1 | 2 | 0 |
| Case 47 | 11 | 193,146     | 5,878,836   | 1 | 1 | 2 | 0 |
| Case 47 | 11 | 5,899,862   | 5,959,757   | 2 | 1 | 3 | 0 |
| Case 47 | 11 | 5,960,036   | 51,591,253  | 1 | 1 | 2 | 0 |
| Case 47 | 11 | 54,794,237  | 134,934,063 | 1 | 1 | 2 | 0 |

|         |    |             |             |   |   |   |   |
|---------|----|-------------|-------------|---|---|---|---|
| Case 47 | 12 | 191,619     | 8,008,132   | 1 | 1 | 2 | 0 |
| Case 47 | 12 | 8,008,179   | 8,125,745   | 3 | 2 | 5 | 0 |
| Case 47 | 12 | 8,130,958   | 34,853,011  | 1 | 1 | 2 | 0 |
| Case 47 | 12 | 37,876,400  | 106,161,826 | 1 | 1 | 2 | 0 |
| Case 47 | 12 | 106,168,928 | 106,593,535 | 2 | 1 | 3 | 0 |
| Case 47 | 12 | 106,593,927 | 133,810,935 | 1 | 1 | 2 | 0 |
| Case 47 | 13 | 19,058,717  | 115,103,529 | 1 | 1 | 2 | 0 |
| Case 47 | 14 | 19,280,733  | 107,287,663 | 1 | 1 | 2 | 0 |
| Case 47 | 15 | 20,034,919  | 102,461,162 | 1 | 1 | 2 | 0 |
| Case 47 | 16 | 88,165      | 35,285,582  | 1 | 1 | 2 | 0 |
| Case 47 | 16 | 46,450,037  | 90,274,695  | 1 | 1 | 2 | 0 |
| Case 47 | 17 | 11,885      | 20,865,108  | 1 | 0 | 1 | 0 |
| Case 47 | 17 | 20,866,865  | 22,242,355  | 1 | 1 | 2 | 0 |
| Case 47 | 17 | 25,268,142  | 25,295,032  | 1 | 1 | 2 | 0 |
| Case 47 | 17 | 25,329,949  | 34,432,735  | 2 | 1 | 3 | 0 |
| Case 47 | 17 | 34,436,532  | 34,597,521  | 3 | 1 | 4 | 0 |
| Case 47 | 17 | 34,815,551  | 81,060,040  | 2 | 1 | 3 | 0 |
| Case 47 | 18 | 87,505      | 9,251,236   | 2 | 0 | 2 | 1 |
| Case 47 | 18 | 9,254,308   | 9,348,490   | 1 | 0 | 1 | 0 |
| Case 47 | 18 | 9,352,858   | 15,375,878  | 2 | 0 | 2 | 1 |
| Case 47 | 18 | 18,520,354  | 48,476,450  | 2 | 0 | 2 | 1 |
| Case 47 | 18 | 48,485,967  | 51,656,039  | 1 | 0 | 1 | 0 |
| Case 47 | 18 | 51,674,135  | 64,734,174  | 2 | 0 | 2 | 1 |
| Case 47 | 18 | 64,741,828  | 64,849,002  | 0 | 0 | 0 | 0 |
| Case 47 | 18 | 64,850,490  | 78,015,180  | 2 | 0 | 2 | 1 |
| Case 47 | 19 | 260,912     | 11,698,138  | 1 | 1 | 2 | 0 |
| Case 47 | 19 | 11,699,193  | 12,581,063  | 1 | 0 | 1 | 0 |
| Case 47 | 19 | 12,586,385  | 24,629,285  | 1 | 1 | 2 | 0 |
| Case 47 | 19 | 27,732,159  | 27,978,445  | 1 | 1 | 2 | 0 |
| Case 47 | 19 | 27,983,651  | 59,097,160  | 3 | 1 | 4 | 0 |
| Case 47 | 20 | 63,244      | 26,293,985  | 2 | 1 | 3 | 0 |
| Case 47 | 20 | 29,425,357  | 62,948,788  | 2 | 1 | 3 | 0 |
| Case 47 | 21 | 10,827,533  | 10,971,337  | 1 | 1 | 2 | 0 |
| Case 47 | 21 | 14,368,320  | 35,773,931  | 1 | 1 | 2 | 0 |
| Case 47 | 21 | 35,774,898  | 35,812,178  | 1 | 0 | 1 | 0 |
| Case 47 | 21 | 35,812,627  | 48,100,155  | 1 | 1 | 2 | 0 |
| Case 47 | 22 | 16,114,244  | 51,195,728  | 1 | 1 | 2 | 0 |
| Case 47 | X  | 2,700,157   | 58,488,110  | 1 | 0 | 1 | 0 |
| Case 47 | X  | 61,694,576  | 154,898,561 | 1 | 0 | 1 | 0 |
| Case 49 | 1  | 82,154      | 121,346,616 | 1 | 1 | 2 | 0 |
| Case 49 | 1  | 142,649,718 | 249,218,992 | 1 | 1 | 2 | 0 |
| Case 49 | 2  | 18,674      | 92,081,640  | 1 | 1 | 2 | 0 |
| Case 49 | 2  | 95,429,424  | 243,048,760 | 1 | 1 | 2 | 0 |
| Case 49 | 3  | 61,495      | 90,442,925  | 1 | 1 | 2 | 0 |
| Case 49 | 3  | 93,537,290  | 197,838,262 | 1 | 1 | 2 | 0 |
| Case 49 | 4  | 71,566      | 49,620,898  | 1 | 1 | 2 | 0 |
| Case 49 | 4  | 52,697,856  | 190,963,766 | 1 | 1 | 2 | 0 |
| Case 49 | 5  | 38,139      | 46,399,093  | 1 | 1 | 2 | 0 |
| Case 49 | 5  | 49,457,282  | 180,693,127 | 1 | 1 | 2 | 0 |
| Case 49 | 6  | 108,666     | 58,752,089  | 1 | 1 | 2 | 0 |
| Case 49 | 6  | 61,891,118  | 170,980,171 | 1 | 1 | 2 | 0 |
| Case 49 | 7  | 44,935      | 58,019,061  | 1 | 1 | 2 | 0 |
| Case 49 | 7  | 61,056,053  | 159,119,486 | 1 | 1 | 2 | 0 |
| Case 49 | 8  | 164,984     | 43,791,691  | 1 | 1 | 2 | 0 |
| Case 49 | 8  | 46,886,735  | 146,293,414 | 1 | 1 | 2 | 0 |
| Case 49 | 9  | 46,587      | 46,944,322  | 1 | 1 | 2 | 0 |
| Case 49 | 9  | 65,629,772  | 141,066,491 | 1 | 1 | 2 | 0 |
| Case 49 | 10 | 98,087      | 39,097,912  | 1 | 1 | 2 | 0 |
| Case 49 | 10 | 42,436,301  | 135,477,883 | 1 | 1 | 2 | 0 |
| Case 49 | 11 | 193,146     | 51,591,253  | 1 | 1 | 2 | 0 |
| Case 49 | 11 | 54,794,237  | 134,934,063 | 1 | 1 | 2 | 0 |



|         |    |             |             |   |   |   |   |
|---------|----|-------------|-------------|---|---|---|---|
| Case 49 | 12 | 191,619     | 34,853,011  | 1 | 1 | 2 | 0 |
| Case 49 | 12 | 37,876,400  | 133,810,935 | 1 | 1 | 2 | 0 |
| Case 49 | 13 | 19,058,717  | 115,103,529 | 1 | 1 | 2 | 0 |
| Case 49 | 14 | 19,280,733  | 107,287,663 | 1 | 1 | 2 | 0 |
| Case 49 | 15 | 20,034,919  | 102,461,162 | 1 | 1 | 2 | 0 |
| Case 49 | 16 | 88,165      | 35,285,582  | 1 | 1 | 2 | 0 |
| Case 49 | 16 | 46,450,037  | 90,274,695  | 1 | 1 | 2 | 0 |
| Case 49 | 17 | 11,885      | 22,242,355  | 1 | 1 | 2 | 0 |
| Case 49 | 17 | 25,268,142  | 34,436,708  | 1 | 1 | 2 | 0 |
| Case 49 | 17 | 34,443,811  | 34,476,396  | 2 | 1 | 3 | 0 |
| Case 49 | 17 | 34,597,521  | 81,060,040  | 1 | 1 | 2 | 0 |
| Case 49 | 18 | 87,505      | 15,375,878  | 1 | 1 | 2 | 0 |
| Case 49 | 18 | 18,520,354  | 78,015,180  | 1 | 1 | 2 | 0 |
| Case 49 | 19 | 260,912     | 24,629,285  | 1 | 1 | 2 | 0 |
| Case 49 | 19 | 27,732,159  | 59,097,160  | 1 | 1 | 2 | 0 |
| Case 49 | 20 | 63,244      | 26,293,985  | 1 | 1 | 2 | 0 |
| Case 49 | 20 | 29,425,357  | 62,948,788  | 1 | 1 | 2 | 0 |
| Case 49 | 21 | 10,827,533  | 10,971,337  | 1 | 1 | 2 | 0 |
| Case 49 | 21 | 14,368,320  | 48,100,155  | 1 | 1 | 2 | 0 |
| Case 49 | 22 | 16,114,244  | 51,195,728  | 1 | 1 | 2 | 0 |
| Case 49 | X  | 2,700,157   | 58,488,110  | 1 | 0 | 1 | 0 |
| Case 49 | X  | 61,694,576  | 154,898,561 | 1 | 0 | 1 | 0 |
| Case 50 | 1  | 82,154      | 71,954,701  | 2 | 0 | 2 | 1 |
| Case 50 | 1  | 71,960,291  | 72,217,553  | 1 | 0 | 1 | 0 |
| Case 50 | 1  | 72,222,487  | 72,480,008  | 0 | 0 | 0 | 0 |
| Case 50 | 1  | 72,488,815  | 72,531,925  | 1 | 0 | 1 | 0 |
| Case 50 | 1  | 72,532,506  | 102,647,938 | 2 | 0 | 2 | 1 |
| Case 50 | 1  | 102,649,588 | 109,612,484 | 1 | 0 | 1 | 0 |
| Case 50 | 1  | 109,612,806 | 111,183,367 | 2 | 0 | 2 | 1 |
| Case 50 | 1  | 111,187,857 | 114,466,110 | 1 | 0 | 1 | 0 |
| Case 50 | 1  | 114,471,189 | 114,797,698 | 2 | 0 | 2 | 1 |
| Case 50 | 1  | 114,799,870 | 120,011,081 | 1 | 0 | 1 | 0 |
| Case 50 | 1  | 120,014,607 | 121,346,616 | 2 | 0 | 2 | 1 |
| Case 50 | 1  | 142,649,718 | 161,660,696 | 2 | 1 | 3 | 0 |
| Case 50 | 1  | 161,661,489 | 246,091,276 | 2 | 2 | 4 | 0 |
| Case 50 | 1  | 246,097,156 | 246,409,434 | 2 | 1 | 3 | 0 |
| Case 50 | 1  | 246,410,112 | 246,618,880 | 1 | 0 | 1 | 0 |
| Case 50 | 1  | 246,618,945 | 249,218,992 | 2 | 1 | 3 | 0 |
| Case 50 | 2  | 18,674      | 42,091,025  | 1 | 1 | 2 | 0 |
| Case 50 | 2  | 42,095,441  | 42,405,743  | 2 | 1 | 3 | 0 |
| Case 50 | 2  | 42,419,829  | 49,247,259  | 1 | 1 | 2 | 0 |
| Case 50 | 2  | 49,247,832  | 49,265,885  | 2 | 1 | 3 | 0 |
| Case 50 | 2  | 49,266,314  | 73,938,295  | 1 | 1 | 2 | 0 |
| Case 50 | 2  | 73,955,571  | 73,999,654  | 1 | 0 | 1 | 0 |
| Case 50 | 2  | 74,007,136  | 77,797,064  | 1 | 1 | 2 | 0 |
| Case 50 | 2  | 77,805,397  | 78,074,314  | 1 | 0 | 1 | 0 |
| Case 50 | 2  | 78,075,083  | 79,779,796  | 1 | 1 | 2 | 0 |
| Case 50 | 2  | 79,781,587  | 79,934,864  | 1 | 0 | 1 | 0 |
| Case 50 | 2  | 79,935,003  | 80,095,216  | 2 | 0 | 2 | 1 |
| Case 50 | 2  | 80,097,279  | 92,081,640  | 1 | 1 | 2 | 0 |
| Case 50 | 2  | 95,429,424  | 96,737,083  | 3 | 1 | 4 | 0 |
| Case 50 | 2  | 96,747,466  | 115,573,499 | 3 | 0 | 3 | 1 |
| Case 50 | 2  | 115,577,204 | 123,796,040 | 2 | 0 | 2 | 1 |
| Case 50 | 2  | 123,797,042 | 123,943,220 | 1 | 0 | 1 | 0 |
| Case 50 | 2  | 123,951,832 | 139,082,736 | 2 | 0 | 2 | 1 |
| Case 50 | 2  | 139,085,690 | 139,328,799 | 1 | 0 | 1 | 0 |
| Case 50 | 2  | 139,332,687 | 144,505,690 | 2 | 0 | 2 | 1 |
| Case 50 | 2  | 144,509,425 | 146,737,198 | 3 | 0 | 3 | 1 |
| Case 50 | 2  | 146,740,793 | 149,170,115 | 2 | 0 | 2 | 1 |
| Case 50 | 2  | 149,178,974 | 153,399,594 | 3 | 0 | 3 | 1 |
| Case 50 | 2  | 153,402,571 | 155,291,579 | 2 | 0 | 2 | 1 |

|         |   |             |             |   |   |   |   |
|---------|---|-------------|-------------|---|---|---|---|
| Case 50 | 2 | 155,294,795 | 184,001,854 | 3 | 0 | 3 | 1 |
| Case 50 | 2 | 184,013,706 | 187,360,053 | 2 | 0 | 2 | 1 |
| Case 50 | 2 | 187,366,061 | 187,521,118 | 0 | 0 | 0 | 0 |
| Case 50 | 2 | 187,521,260 | 187,562,355 | 1 | 0 | 1 | 0 |
| Case 50 | 2 | 187,571,699 | 195,219,153 | 2 | 0 | 2 | 1 |
| Case 50 | 2 | 195,266,232 | 243,048,760 | 3 | 0 | 3 | 1 |
| Case 50 | 3 | 61,495      | 958,096     | 2 | 1 | 3 | 0 |
| Case 50 | 3 | 963,381     | 3,581,077   | 2 | 0 | 2 | 1 |
| Case 50 | 3 | 3,582,105   | 4,969,387   | 3 | 0 | 3 | 1 |
| Case 50 | 3 | 4,973,586   | 6,753,259   | 2 | 0 | 2 | 1 |
| Case 50 | 3 | 6,760,499   | 8,092,805   | 4 | 0 | 4 | 1 |
| Case 50 | 3 | 8,093,466   | 9,689,712   | 5 | 0 | 5 | 1 |
| Case 50 | 3 | 9,702,755   | 13,503,058  | 4 | 0 | 4 | 1 |
| Case 50 | 3 | 13,504,556  | 13,677,946  | 5 | 0 | 5 | 1 |
| Case 50 | 3 | 13,678,020  | 15,410,365  | 4 | 0 | 4 | 1 |
| Case 50 | 3 | 15,427,117  | 16,381,111  | 2 | 0 | 2 | 1 |
| Case 50 | 3 | 16,385,395  | 17,214,070  | 4 | 0 | 4 | 1 |
| Case 50 | 3 | 17,221,252  | 19,103,739  | 5 | 0 | 5 | 1 |
| Case 50 | 3 | 19,112,134  | 21,535,708  | 2 | 0 | 2 | 1 |
| Case 50 | 3 | 21,544,296  | 22,318,273  | 5 | 0 | 5 | 1 |
| Case 50 | 3 | 22,327,742  | 40,715,040  | 2 | 0 | 2 | 1 |
| Case 50 | 3 | 40,722,876  | 41,220,433  | 3 | 0 | 3 | 1 |
| Case 50 | 3 | 41,230,654  | 60,220,486  | 2 | 0 | 2 | 1 |
| Case 50 | 3 | 60,228,660  | 60,908,013  | 0 | 0 | 0 | 0 |
| Case 50 | 3 | 60,918,609  | 71,330,583  | 2 | 0 | 2 | 1 |
| Case 50 | 3 | 71,330,949  | 71,677,817  | 1 | 0 | 1 | 0 |
| Case 50 | 3 | 71,681,950  | 85,336,559  | 2 | 0 | 2 | 1 |
| Case 50 | 3 | 85,349,089  | 85,656,222  | 1 | 0 | 1 | 0 |
| Case 50 | 3 | 85,657,609  | 90,442,925  | 2 | 0 | 2 | 1 |
| Case 50 | 3 | 93,537,290  | 93,537,290  | 2 | 0 | 2 | 1 |
| Case 50 | 3 | 93,545,404  | 103,256,322 | 2 | 1 | 3 | 0 |
| Case 50 | 3 | 103,271,449 | 175,066,203 | 2 | 0 | 2 | 1 |
| Case 50 | 3 | 175,067,922 | 175,329,367 | 1 | 0 | 1 | 0 |
| Case 50 | 3 | 175,334,302 | 197,838,262 | 2 | 0 | 2 | 1 |
| Case 50 | 4 | 71,566      | 5,384,256   | 3 | 0 | 3 | 1 |
| Case 50 | 4 | 5,387,403   | 49,620,898  | 2 | 0 | 2 | 1 |
| Case 50 | 4 | 52,697,856  | 91,889,469  | 2 | 0 | 2 | 1 |
| Case 50 | 4 | 91,894,603  | 92,053,582  | 1 | 0 | 1 | 0 |
| Case 50 | 4 | 92,054,563  | 190,963,766 | 2 | 0 | 2 | 1 |
| Case 50 | 5 | 38,139      | 46,378,957  | 3 | 1 | 4 | 0 |
| Case 50 | 5 | 46,399,093  | 46,399,093  | 1 | 1 | 2 | 0 |
| Case 50 | 5 | 49,457,282  | 103,989,098 | 1 | 1 | 2 | 0 |
| Case 50 | 5 | 103,994,246 | 104,139,803 | 1 | 0 | 1 | 0 |
| Case 50 | 5 | 104,147,248 | 105,350,426 | 1 | 1 | 2 | 0 |
| Case 50 | 5 | 105,355,890 | 180,693,127 | 2 | 1 | 3 | 0 |
| Case 50 | 6 | 108,666     | 1,921,848   | 2 | 0 | 2 | 1 |
| Case 50 | 6 | 1,926,650   | 2,139,450   | 1 | 0 | 1 | 0 |
| Case 50 | 6 | 2,145,136   | 53,427,397  | 2 | 0 | 2 | 1 |
| Case 50 | 6 | 53,429,272  | 55,710,872  | 2 | 2 | 4 | 0 |
| Case 50 | 6 | 55,711,211  | 58,752,089  | 2 | 1 | 3 | 0 |
| Case 50 | 6 | 61,891,118  | 67,660,858  | 2 | 1 | 3 | 0 |
| Case 50 | 6 | 67,664,566  | 123,945,300 | 2 | 2 | 4 | 0 |
| Case 50 | 6 | 123,950,488 | 124,150,232 | 1 | 1 | 2 | 0 |
| Case 50 | 6 | 124,153,758 | 137,234,633 | 2 | 2 | 4 | 0 |
| Case 50 | 6 | 137,234,970 | 137,462,218 | 2 | 1 | 3 | 0 |
| Case 50 | 6 | 137,464,218 | 144,446,518 | 2 | 2 | 4 | 0 |
| Case 50 | 6 | 144,454,797 | 146,785,984 | 3 | 0 | 3 | 1 |
| Case 50 | 6 | 146,794,697 | 147,723,577 | 2 | 0 | 2 | 1 |
| Case 50 | 6 | 147,730,324 | 148,242,514 | 3 | 0 | 3 | 1 |
| Case 50 | 6 | 148,247,765 | 150,412,758 | 2 | 0 | 2 | 1 |
| Case 50 | 6 | 150,412,833 | 150,754,157 | 3 | 0 | 3 | 1 |

|         |    |             |             |   |   |   |   |
|---------|----|-------------|-------------|---|---|---|---|
| Case 50 | 6  | 150,755,619 | 162,667,011 | 2 | 0 | 2 | 1 |
| Case 50 | 6  | 162,668,889 | 162,736,476 | 0 | 0 | 0 | 0 |
| Case 50 | 6  | 162,737,217 | 163,192,038 | 2 | 0 | 2 | 1 |
| Case 50 | 6  | 163,201,379 | 163,280,204 | 0 | 0 | 0 | 0 |
| Case 50 | 6  | 163,284,038 | 170,980,171 | 2 | 0 | 2 | 1 |
| Case 50 | 7  | 44,935      | 3,264,548   | 2 | 1 | 3 | 0 |
| Case 50 | 7  | 3,264,878   | 3,727,993   | 2 | 2 | 4 | 0 |
| Case 50 | 7  | 3,728,881   | 7,031,261   | 2 | 1 | 3 | 0 |
| Case 50 | 7  | 7,040,309   | 32,694,219  | 2 | 2 | 4 | 0 |
| Case 50 | 7  | 32,711,465  | 33,053,281  | 2 | 1 | 3 | 0 |
| Case 50 | 7  | 33,054,435  | 56,841,344  | 2 | 2 | 4 | 0 |
| Case 50 | 7  | 56,878,413  | 58,019,061  | 2 | 1 | 3 | 0 |
| Case 50 | 7  | 61,056,053  | 69,432,765  | 2 | 1 | 3 | 0 |
| Case 50 | 7  | 69,445,526  | 70,017,937  | 1 | 1 | 2 | 0 |
| Case 50 | 7  | 70,018,135  | 76,185,628  | 2 | 1 | 3 | 0 |
| Case 50 | 7  | 76,198,932  | 97,731,700  | 2 | 2 | 4 | 0 |
| Case 50 | 7  | 97,734,248  | 102,999,943 | 2 | 1 | 3 | 0 |
| Case 50 | 7  | 103,003,969 | 117,207,860 | 2 | 2 | 4 | 0 |
| Case 50 | 7  | 117,214,089 | 117,307,108 | 2 | 1 | 3 | 0 |
| Case 50 | 7  | 117,307,487 | 130,929,680 | 2 | 2 | 4 | 0 |
| Case 50 | 7  | 130,932,541 | 132,489,250 | 2 | 1 | 3 | 0 |
| Case 50 | 7  | 132,495,299 | 159,119,486 | 2 | 2 | 4 | 0 |
| Case 50 | 8  | 164,984     | 2,132,561   | 1 | 1 | 2 | 0 |
| Case 50 | 8  | 2,133,338   | 2,391,471   | 2 | 1 | 3 | 0 |
| Case 50 | 8  | 2,394,776   | 35,754,100  | 1 | 1 | 2 | 0 |
| Case 50 | 8  | 35,769,316  | 43,791,691  | 2 | 1 | 3 | 0 |
| Case 50 | 8  | 46,886,735  | 146,293,414 | 2 | 1 | 3 | 0 |
| Case 50 | 9  | 46,587      | 8,257,725   | 3 | 1 | 4 | 0 |
| Case 50 | 9  | 8,258,063   | 8,786,827   | 2 | 1 | 3 | 0 |
| Case 50 | 9  | 8,787,733   | 8,926,071   | 1 | 1 | 2 | 0 |
| Case 50 | 9  | 8,926,956   | 9,102,409   | 1 | 0 | 1 | 0 |
| Case 50 | 9  | 9,104,869   | 9,187,539   | 2 | 0 | 2 | 1 |
| Case 50 | 9  | 9,188,865   | 9,380,781   | 1 | 0 | 1 | 0 |
| Case 50 | 9  | 9,381,760   | 9,494,729   | 1 | 1 | 2 | 0 |
| Case 50 | 9  | 9,495,226   | 9,649,668   | 1 | 0 | 1 | 0 |
| Case 50 | 9  | 9,664,440   | 10,404,336  | 1 | 1 | 2 | 0 |
| Case 50 | 9  | 10,409,555  | 12,509,667  | 2 | 1 | 3 | 0 |
| Case 50 | 9  | 12,510,515  | 14,908,056  | 1 | 1 | 2 | 0 |
| Case 50 | 9  | 14,919,539  | 28,795,700  | 2 | 1 | 3 | 0 |
| Case 50 | 9  | 28,796,648  | 28,867,478  | 2 | 0 | 2 | 1 |
| Case 50 | 9  | 28,869,800  | 30,057,012  | 2 | 1 | 3 | 0 |
| Case 50 | 9  | 30,064,199  | 30,257,830  | 1 | 0 | 1 | 0 |
| Case 50 | 9  | 30,260,156  | 46,944,322  | 2 | 1 | 3 | 0 |
| Case 50 | 9  | 65,629,772  | 73,167,783  | 2 | 1 | 3 | 0 |
| Case 50 | 9  | 73,168,680  | 119,576,802 | 1 | 1 | 2 | 0 |
| Case 50 | 9  | 119,578,333 | 119,645,481 | 1 | 0 | 1 | 0 |
| Case 50 | 9  | 119,646,682 | 128,546,359 | 1 | 1 | 2 | 0 |
| Case 50 | 9  | 128,554,563 | 136,120,091 | 2 | 1 | 3 | 0 |
| Case 50 | 9  | 136,121,441 | 136,179,407 | 2 | 2 | 4 | 0 |
| Case 50 | 9  | 136,179,704 | 141,066,491 | 2 | 1 | 3 | 0 |
| Case 50 | 10 | 98,087      | 39,097,912  | 2 | 1 | 3 | 0 |
| Case 50 | 10 | 42,436,301  | 52,231,729  | 3 | 1 | 4 | 0 |
| Case 50 | 10 | 52,232,694  | 54,807,938  | 4 | 1 | 5 | 0 |
| Case 50 | 10 | 54,809,993  | 76,074,489  | 3 | 1 | 4 | 0 |
| Case 50 | 10 | 76,089,182  | 76,373,904  | 1 | 0 | 1 | 0 |
| Case 50 | 10 | 76,400,262  | 135,477,883 | 3 | 1 | 4 | 0 |
| Case 50 | 11 | 193,146     | 8,751,746   | 3 | 0 | 3 | 1 |
| Case 50 | 11 | 8,751,889   | 20,978,633  | 4 | 0 | 4 | 1 |
| Case 50 | 11 | 20,980,037  | 34,753,375  | 2 | 0 | 2 | 1 |
| Case 50 | 11 | 34,753,747  | 34,895,100  | 4 | 0 | 4 | 1 |
| Case 50 | 11 | 34,902,135  | 50,551,954  | 2 | 0 | 2 | 1 |

|         |    |             |             |   |   |   |   |
|---------|----|-------------|-------------|---|---|---|---|
| Case 50 | 11 | 50,566,719  | 51,379,204  | 1 | 0 | 1 | 0 |
| Case 50 | 11 | 51,383,999  | 51,591,253  | 2 | 0 | 2 | 1 |
| Case 50 | 11 | 54,794,237  | 67,798,156  | 2 | 0 | 2 | 1 |
| Case 50 | 11 | 67,798,567  | 116,438,851 | 3 | 0 | 3 | 1 |
| Case 50 | 11 | 116,439,602 | 131,366,138 | 2 | 0 | 2 | 1 |
| Case 50 | 11 | 131,368,641 | 132,314,776 | 1 | 0 | 1 | 0 |
| Case 50 | 11 | 132,320,394 | 134,934,063 | 2 | 0 | 2 | 1 |
| Case 50 | 12 | 191,619     | 351,711     | 2 | 0 | 2 | 1 |
| Case 50 | 12 | 352,899     | 3,234,893   | 1 | 0 | 1 | 0 |
| Case 50 | 12 | 3,238,008   | 3,431,571   | 2 | 0 | 2 | 1 |
| Case 50 | 12 | 3,434,881   | 5,073,008   | 1 | 0 | 1 | 0 |
| Case 50 | 12 | 5,073,375   | 11,768,969  | 2 | 0 | 2 | 1 |
| Case 50 | 12 | 11,770,270  | 12,042,697  | 3 | 0 | 3 | 1 |
| Case 50 | 12 | 12,045,185  | 34,853,011  | 2 | 0 | 2 | 1 |
| Case 50 | 12 | 37,876,400  | 99,830,822  | 2 | 0 | 2 | 1 |
| Case 50 | 12 | 99,837,070  | 99,960,522  | 1 | 0 | 1 | 0 |
| Case 50 | 12 | 99,961,349  | 133,810,935 | 2 | 0 | 2 | 1 |
| Case 50 | 13 | 19,058,717  | 106,567,388 | 4 | 0 | 4 | 1 |
| Case 50 | 13 | 106,567,677 | 115,103,529 | 3 | 0 | 3 | 1 |
| Case 50 | 14 | 19,280,733  | 22,204,568  | 2 | 0 | 2 | 1 |
| Case 50 | 14 | 22,204,911  | 22,988,571  | 3 | 0 | 3 | 1 |
| Case 50 | 14 | 22,997,833  | 45,433,309  | 2 | 0 | 2 | 1 |
| Case 50 | 14 | 45,433,350  | 45,693,307  | 1 | 0 | 1 | 0 |
| Case 50 | 14 | 45,693,341  | 92,659,940  | 2 | 0 | 2 | 1 |
| Case 50 | 14 | 92,666,291  | 92,844,370  | 3 | 0 | 3 | 1 |
| Case 50 | 14 | 92,846,294  | 107,287,663 | 2 | 0 | 2 | 1 |
| Case 50 | 15 | 20,034,919  | 102,461,162 | 3 | 0 | 3 | 1 |
| Case 50 | 16 | 88,165      | 6,272,049   | 1 | 0 | 1 | 0 |
| Case 50 | 16 | 6,275,531   | 6,328,922   | 0 | 0 | 0 | 0 |
| Case 50 | 16 | 6,336,737   | 6,404,837   | 1 | 0 | 1 | 0 |
| Case 50 | 16 | 6,410,204   | 6,478,898   | 0 | 0 | 0 | 0 |
| Case 50 | 16 | 6,481,458   | 6,678,811   | 1 | 0 | 1 | 0 |
| Case 50 | 16 | 6,681,184   | 6,721,013   | 0 | 0 | 0 | 0 |
| Case 50 | 16 | 6,721,292   | 6,891,681   | 1 | 0 | 1 | 0 |
| Case 50 | 16 | 6,892,619   | 6,972,216   | 0 | 0 | 0 | 0 |
| Case 50 | 16 | 6,993,055   | 7,030,485   | 1 | 0 | 1 | 0 |
| Case 50 | 16 | 7,032,232   | 7,282,505   | 0 | 0 | 0 | 0 |
| Case 50 | 16 | 7,283,180   | 17,183,641  | 1 | 0 | 1 | 0 |
| Case 50 | 16 | 17,190,040  | 35,285,582  | 2 | 0 | 2 | 1 |
| Case 50 | 16 | 46,450,037  | 51,813,861  | 2 | 0 | 2 | 1 |
| Case 50 | 16 | 51,819,189  | 52,919,566  | 3 | 0 | 3 | 1 |
| Case 50 | 16 | 52,936,826  | 78,546,225  | 2 | 0 | 2 | 1 |
| Case 50 | 16 | 78,548,574  | 78,631,794  | 0 | 0 | 0 | 0 |
| Case 50 | 16 | 78,635,193  | 78,769,788  | 1 | 0 | 1 | 0 |
| Case 50 | 16 | 78,784,233  | 78,854,228  | 2 | 0 | 2 | 1 |
| Case 50 | 16 | 78,854,487  | 78,902,681  | 0 | 0 | 0 | 0 |
| Case 50 | 16 | 78,903,101  | 90,274,695  | 2 | 0 | 2 | 1 |
| Case 50 | 17 | 11,885      | 21,798,506  | 2 | 0 | 2 | 1 |
| Case 50 | 17 | 21,807,097  | 22,242,355  | 2 | 1 | 3 | 0 |
| Case 50 | 17 | 25,268,142  | 28,075,046  | 2 | 1 | 3 | 0 |
| Case 50 | 17 | 28,104,306  | 29,147,164  | 3 | 1 | 4 | 0 |
| Case 50 | 17 | 29,158,515  | 69,842,086  | 1 | 1 | 2 | 0 |
| Case 50 | 17 | 69,846,053  | 70,716,034  | 2 | 1 | 3 | 0 |
| Case 50 | 17 | 70,716,264  | 81,060,040  | 1 | 1 | 2 | 0 |
| Case 50 | 18 | 87,505      | 15,375,878  | 2 | 0 | 2 | 1 |
| Case 50 | 18 | 18,520,354  | 47,818,688  | 2 | 0 | 2 | 1 |
| Case 50 | 18 | 47,819,568  | 48,946,926  | 1 | 0 | 1 | 0 |
| Case 50 | 18 | 48,948,604  | 78,015,180  | 2 | 0 | 2 | 1 |
| Case 50 | 19 | 260,912     | 504,948     | 2 | 1 | 3 | 0 |
| Case 50 | 19 | 506,712     | 1,101,992   | 2 | 0 | 2 | 1 |
| Case 50 | 19 | 1,104,078   | 1,127,876   | 1 | 0 | 1 | 0 |

|         |    |             |             |   |   |   |   |
|---------|----|-------------|-------------|---|---|---|---|
| Case 50 | 19 | 1,132,637   | 20,809,176  | 2 | 0 | 2 | 1 |
| Case 50 | 19 | 20,826,692  | 24,629,285  | 2 | 2 | 4 | 0 |
| Case 50 | 19 | 27,732,159  | 29,327,736  | 2 | 2 | 4 | 0 |
| Case 50 | 19 | 29,331,733  | 29,808,196  | 2 | 1 | 3 | 0 |
| Case 50 | 19 | 29,809,851  | 29,902,465  | 3 | 2 | 5 | 0 |
| Case 50 | 19 | 29,904,906  | 30,064,955  | 2 | 2 | 4 | 0 |
| Case 50 | 19 | 30,065,285  | 31,350,366  | 3 | 2 | 5 | 0 |
| Case 50 | 19 | 31,354,223  | 31,996,788  | 2 | 2 | 4 | 0 |
| Case 50 | 19 | 32,011,548  | 32,608,345  | 2 | 1 | 3 | 0 |
| Case 50 | 19 | 32,611,716  | 32,798,938  | 3 | 2 | 5 | 0 |
| Case 50 | 19 | 32,809,751  | 37,099,623  | 2 | 2 | 4 | 0 |
| Case 50 | 19 | 37,100,817  | 37,534,349  | 3 | 2 | 5 | 0 |
| Case 50 | 19 | 37,547,219  | 37,643,534  | 2 | 1 | 3 | 0 |
| Case 50 | 19 | 37,644,173  | 59,097,160  | 3 | 0 | 3 | 1 |
| Case 50 | 20 | 63,244      | 4,769,374   | 2 | 2 | 4 | 0 |
| Case 50 | 20 | 4,769,834   | 7,262,606   | 2 | 1 | 3 | 0 |
| Case 50 | 20 | 7,271,214   | 8,450,247   | 2 | 2 | 4 | 0 |
| Case 50 | 20 | 8,451,486   | 8,512,994   | 2 | 1 | 3 | 0 |
| Case 50 | 20 | 8,517,451   | 14,169,136  | 2 | 2 | 4 | 0 |
| Case 50 | 20 | 14,172,443  | 14,671,202  | 2 | 1 | 3 | 0 |
| Case 50 | 20 | 14,672,177  | 14,837,965  | 1 | 0 | 1 | 0 |
| Case 50 | 20 | 14,840,438  | 14,926,333  | 0 | 0 | 0 | 0 |
| Case 50 | 20 | 14,926,362  | 15,041,361  | 1 | 0 | 1 | 0 |
| Case 50 | 20 | 15,041,578  | 15,183,893  | 2 | 0 | 2 | 1 |
| Case 50 | 20 | 15,189,598  | 15,527,445  | 2 | 1 | 3 | 0 |
| Case 50 | 20 | 15,529,763  | 26,293,985  | 2 | 2 | 4 | 0 |
| Case 50 | 20 | 29,425,357  | 62,948,788  | 2 | 2 | 4 | 0 |
| Case 50 | 21 | 10,827,533  | 10,971,337  | 1 | 1 | 2 | 0 |
| Case 50 | 21 | 14,368,320  | 48,100,155  | 1 | 1 | 2 | 0 |
| Case 50 | 22 | 16,114,244  | 51,195,728  | 3 | 0 | 3 | 1 |
| Case 50 | X  | 2,700,157   | 26,252,686  | 2 | 0 | 2 | 1 |
| Case 50 | X  | 26,273,713  | 27,756,497  | 1 | 0 | 1 | 0 |
| Case 50 | X  | 27,758,574  | 28,233,053  | 2 | 0 | 2 | 1 |
| Case 50 | X  | 28,252,543  | 58,488,110  | 3 | 0 | 3 | 1 |
| Case 50 | X  | 61,694,576  | 154,898,561 | 3 | 0 | 3 | 1 |
| Case 52 | 1  | 82,154      | 120,111,002 | 1 | 1 | 2 | 0 |
| Case 52 | 1  | 120,115,384 | 120,164,966 | 2 | 1 | 3 | 0 |
| Case 52 | 1  | 120,165,187 | 121,346,616 | 1 | 1 | 2 | 0 |
| Case 52 | 1  | 142,649,718 | 249,218,992 | 1 | 1 | 2 | 0 |
| Case 52 | 2  | 18,674      | 92,081,640  | 1 | 1 | 2 | 0 |
| Case 52 | 2  | 95,429,424  | 243,048,760 | 1 | 1 | 2 | 0 |
| Case 52 | 3  | 61,495      | 90,442,925  | 1 | 1 | 2 | 0 |
| Case 52 | 3  | 93,537,290  | 197,838,262 | 1 | 1 | 2 | 0 |
| Case 52 | 4  | 71,566      | 49,620,898  | 1 | 1 | 2 | 0 |
| Case 52 | 4  | 52,697,856  | 190,963,766 | 1 | 1 | 2 | 0 |
| Case 52 | 5  | 38,139      | 46,399,093  | 1 | 1 | 2 | 0 |
| Case 52 | 5  | 49,457,282  | 180,693,127 | 1 | 1 | 2 | 0 |
| Case 52 | 6  | 108,666     | 58,752,089  | 1 | 1 | 2 | 0 |
| Case 52 | 6  | 61,891,118  | 170,980,171 | 1 | 1 | 2 | 0 |
| Case 52 | 7  | 44,935      | 58,019,061  | 1 | 1 | 2 | 0 |
| Case 52 | 7  | 61,056,053  | 159,119,486 | 1 | 1 | 2 | 0 |
| Case 52 | 8  | 164,984     | 43,791,691  | 1 | 1 | 2 | 0 |
| Case 52 | 8  | 46,886,735  | 126,419,188 | 1 | 1 | 2 | 0 |
| Case 52 | 8  | 126,426,386 | 126,758,146 | 2 | 1 | 3 | 0 |
| Case 52 | 8  | 126,761,402 | 127,366,340 | 1 | 1 | 2 | 0 |
| Case 52 | 8  | 127,368,518 | 129,343,201 | 2 | 1 | 3 | 0 |
| Case 52 | 8  | 129,351,485 | 146,293,414 | 1 | 1 | 2 | 0 |
| Case 52 | 9  | 46,587      | 46,944,322  | 1 | 1 | 2 | 0 |
| Case 52 | 9  | 65,629,772  | 141,066,491 | 1 | 1 | 2 | 0 |
| Case 52 | 10 | 98,087      | 39,097,912  | 1 | 1 | 2 | 0 |
| Case 52 | 10 | 42,436,301  | 135,477,883 | 1 | 1 | 2 | 0 |

|         |    |             |             |   |   |   |   |
|---------|----|-------------|-------------|---|---|---|---|
| Case 52 | 11 | 193,146     | 51,591,253  | 1 | 1 | 2 | 0 |
| Case 52 | 11 | 54,794,237  | 134,934,063 | 1 | 1 | 2 | 0 |
| Case 52 | 12 | 191,619     | 34,853,011  | 1 | 1 | 2 | 0 |
| Case 52 | 12 | 37,876,400  | 133,810,935 | 1 | 1 | 2 | 0 |
| Case 52 | 13 | 19,058,717  | 115,103,529 | 1 | 1 | 2 | 0 |
| Case 52 | 14 | 19,280,733  | 107,287,663 | 1 | 1 | 2 | 0 |
| Case 52 | 15 | 20,034,919  | 102,461,162 | 1 | 1 | 2 | 0 |
| Case 52 | 16 | 88,165      | 35,285,582  | 1 | 1 | 2 | 0 |
| Case 52 | 16 | 46,450,037  | 90,274,695  | 1 | 1 | 2 | 0 |
| Case 52 | 17 | 11,885      | 22,242,355  | 1 | 1 | 2 | 0 |
| Case 52 | 17 | 25,268,142  | 34,436,708  | 1 | 1 | 2 | 0 |
| Case 52 | 17 | 34,443,811  | 34,476,396  | 2 | 1 | 3 | 0 |
| Case 52 | 17 | 34,597,521  | 39,777,128  | 1 | 1 | 2 | 0 |
| Case 52 | 17 | 39,788,384  | 40,065,774  | 2 | 1 | 3 | 0 |
| Case 52 | 17 | 40,070,029  | 81,060,040  | 1 | 1 | 2 | 0 |
| Case 52 | 18 | 87,505      | 15,375,878  | 1 | 1 | 2 | 0 |
| Case 52 | 18 | 18,520,354  | 78,015,180  | 1 | 1 | 2 | 0 |
| Case 52 | 19 | 260,912     | 24,629,285  | 1 | 1 | 2 | 0 |
| Case 52 | 19 | 27,732,159  | 59,097,160  | 1 | 1 | 2 | 0 |
| Case 52 | 20 | 63,244      | 26,293,985  | 1 | 1 | 2 | 0 |
| Case 52 | 20 | 29,425,357  | 62,948,788  | 1 | 1 | 2 | 0 |
| Case 52 | 21 | 10,827,533  | 10,971,337  | 1 | 1 | 2 | 0 |
| Case 52 | 21 | 14,368,320  | 48,100,155  | 1 | 1 | 2 | 0 |
| Case 52 | 22 | 16,114,244  | 51,195,728  | 1 | 1 | 2 | 0 |
| Case 52 | X  | 2,700,157   | 58,488,110  | 1 | 1 | 2 | 0 |
| Case 52 | X  | 61,694,576  | 154,898,561 | 1 | 1 | 2 | 0 |
| Case 53 | 1  | 82,154      | 121,346,616 | 1 | 1 | 2 | 0 |
| Case 53 | 1  | 142,649,718 | 249,218,992 | 1 | 1 | 2 | 0 |
| Case 53 | 2  | 18,674      | 92,081,640  | 1 | 1 | 2 | 0 |
| Case 53 | 2  | 95,429,424  | 243,048,760 | 1 | 1 | 2 | 0 |
| Case 53 | 3  | 61,495      | 60,197,485  | 1 | 1 | 2 | 0 |
| Case 53 | 3  | 60,209,987  | 61,232,197  | 1 | 0 | 1 | 0 |
| Case 53 | 3  | 61,236,328  | 90,442,925  | 1 | 1 | 2 | 0 |
| Case 53 | 3  | 93,537,290  | 162,266,475 | 1 | 1 | 2 | 0 |
| Case 53 | 3  | 162,275,610 | 164,613,717 | 1 | 0 | 1 | 0 |
| Case 53 | 3  | 164,631,530 | 197,838,262 | 1 | 1 | 2 | 0 |
| Case 53 | 4  | 71,566      | 22,691,505  | 1 | 1 | 2 | 0 |
| Case 53 | 4  | 22,693,754  | 22,824,021  | 1 | 0 | 1 | 0 |
| Case 53 | 4  | 22,832,447  | 49,620,898  | 1 | 1 | 2 | 0 |
| Case 53 | 4  | 52,697,856  | 161,861,640 | 1 | 1 | 2 | 0 |
| Case 53 | 4  | 161,863,893 | 161,924,832 | 2 | 1 | 3 | 0 |
| Case 53 | 4  | 161,935,342 | 190,963,766 | 1 | 1 | 2 | 0 |
| Case 53 | 5  | 38,139      | 46,399,093  | 1 | 1 | 2 | 0 |
| Case 53 | 5  | 49,457,282  | 180,693,127 | 1 | 1 | 2 | 0 |
| Case 53 | 6  | 108,666     | 58,752,089  | 1 | 1 | 2 | 0 |
| Case 53 | 6  | 61,891,118  | 170,980,171 | 1 | 1 | 2 | 0 |
| Case 53 | 7  | 44,935      | 58,019,061  | 1 | 1 | 2 | 0 |
| Case 53 | 7  | 61,056,053  | 159,119,486 | 1 | 1 | 2 | 0 |
| Case 53 | 8  | 164,984     | 2,108,188   | 1 | 1 | 2 | 0 |
| Case 53 | 8  | 2,109,059   | 43,791,691  | 2 | 1 | 3 | 0 |
| Case 53 | 8  | 46,886,735  | 146,293,414 | 2 | 1 | 3 | 0 |
| Case 53 | 9  | 46,587      | 46,944,322  | 1 | 1 | 2 | 0 |
| Case 53 | 9  | 65,629,772  | 141,066,491 | 1 | 1 | 2 | 0 |
| Case 53 | 10 | 98,087      | 39,097,912  | 1 | 1 | 2 | 0 |
| Case 53 | 10 | 42,436,301  | 135,477,883 | 1 | 1 | 2 | 0 |
| Case 53 | 11 | 193,146     | 51,591,253  | 1 | 1 | 2 | 0 |
| Case 53 | 11 | 54,794,237  | 134,934,063 | 1 | 1 | 2 | 0 |
| Case 53 | 12 | 191,619     | 7,993,316   | 1 | 1 | 2 | 0 |
| Case 53 | 12 | 8,000,912   | 8,114,429   | 2 | 1 | 3 | 0 |
| Case 53 | 12 | 8,123,306   | 34,853,011  | 1 | 1 | 2 | 0 |
| Case 53 | 12 | 37,876,400  | 133,810,935 | 1 | 1 | 2 | 0 |

|         |    |             |             |    |   |    |   |
|---------|----|-------------|-------------|----|---|----|---|
| Case 53 | 13 | 19,058,717  | 115,103,529 | 1  | 1 | 2  | 0 |
| Case 53 | 14 | 19,280,733  | 107,287,663 | 1  | 1 | 2  | 0 |
| Case 53 | 15 | 20,034,919  | 102,461,162 | 1  | 1 | 2  | 0 |
| Case 53 | 16 | 88,165      | 35,285,582  | 1  | 1 | 2  | 0 |
| Case 53 | 16 | 46,450,037  | 90,274,695  | 1  | 1 | 2  | 0 |
| Case 53 | 17 | 11,885      | 22,242,355  | 1  | 1 | 2  | 0 |
| Case 53 | 17 | 25,268,142  | 81,060,040  | 1  | 1 | 2  | 0 |
| Case 53 | 18 | 87,505      | 15,375,878  | 1  | 1 | 2  | 0 |
| Case 53 | 18 | 18,520,354  | 78,015,180  | 1  | 1 | 2  | 0 |
| Case 53 | 19 | 260,912     | 24,629,285  | 1  | 1 | 2  | 0 |
| Case 53 | 19 | 27,732,159  | 59,097,160  | 1  | 1 | 2  | 0 |
| Case 53 | 20 | 63,244      | 26,293,985  | 1  | 1 | 2  | 0 |
| Case 53 | 20 | 29,425,357  | 62,948,788  | 1  | 1 | 2  | 0 |
| Case 53 | 21 | 10,827,533  | 10,971,337  | 1  | 1 | 2  | 0 |
| Case 53 | 21 | 14,368,320  | 48,100,155  | 1  | 1 | 2  | 0 |
| Case 53 | 22 | 16,114,244  | 51,195,728  | 1  | 1 | 2  | 0 |
| Case 53 | X  | 2,700,157   | 32,467,970  | 1  | 0 | 1  | 0 |
| Case 53 | X  | 32,472,777  | 32,536,972  | 0  | 0 | 0  | 0 |
| Case 53 | X  | 32,541,111  | 58,488,110  | 1  | 0 | 1  | 0 |
| Case 53 | X  | 61,694,576  | 154,898,561 | 1  | 0 | 1  | 0 |
| Case 56 | 1  | 82,154      | 4,009,694   | 2  | 1 | 3  | 0 |
| Case 56 | 1  | 4,009,793   | 13,775,026  | 2  | 2 | 4  | 0 |
| Case 56 | 1  | 13,775,122  | 15,558,938  | 3  | 2 | 5  | 0 |
| Case 56 | 1  | 15,560,900  | 15,732,793  | 3  | 1 | 4  | 0 |
| Case 56 | 1  | 15,733,394  | 16,202,843  | 3  | 2 | 5  | 0 |
| Case 56 | 1  | 16,202,845  | 31,403,711  | 2  | 1 | 3  | 0 |
| Case 56 | 1  | 31,408,056  | 31,471,702  | 3  | 1 | 4  | 0 |
| Case 56 | 1  | 31,490,614  | 42,876,466  | 2  | 1 | 3  | 0 |
| Case 56 | 1  | 42,876,696  | 50,053,885  | 2  | 2 | 4  | 0 |
| Case 56 | 1  | 50,057,166  | 50,416,930  | 2  | 1 | 3  | 0 |
| Case 56 | 1  | 50,426,542  | 54,750,625  | 2  | 2 | 4  | 0 |
| Case 56 | 1  | 54,751,900  | 54,830,569  | 2  | 1 | 3  | 0 |
| Case 56 | 1  | 54,831,801  | 64,647,608  | 2  | 2 | 4  | 0 |
| Case 56 | 1  | 64,656,538  | 64,694,167  | 3  | 2 | 5  | 0 |
| Case 56 | 1  | 64,696,077  | 83,983,252  | 2  | 2 | 4  | 0 |
| Case 56 | 1  | 83,987,643  | 121,346,616 | 2  | 0 | 2  | 1 |
| Case 56 | 1  | 142,649,718 | 146,512,899 | 2  | 0 | 2  | 1 |
| Case 56 | 1  | 146,516,199 | 147,033,573 | 2  | 1 | 3  | 0 |
| Case 56 | 1  | 147,043,542 | 149,060,682 | 2  | 0 | 2  | 1 |
| Case 56 | 1  | 149,140,459 | 171,040,083 | 2  | 1 | 3  | 0 |
| Case 56 | 1  | 171,045,317 | 171,224,083 | 2  | 2 | 4  | 0 |
| Case 56 | 1  | 171,224,087 | 177,905,488 | 2  | 1 | 3  | 0 |
| Case 56 | 1  | 177,906,437 | 178,095,048 | 3  | 1 | 4  | 0 |
| Case 56 | 1  | 178,156,816 | 199,369,479 | 2  | 1 | 3  | 0 |
| Case 56 | 1  | 199,374,488 | 240,791,177 | 3  | 1 | 4  | 0 |
| Case 56 | 1  | 240,798,089 | 243,731,693 | 1  | 1 | 2  | 0 |
| Case 56 | 1  | 243,768,906 | 249,218,992 | 2  | 1 | 3  | 0 |
| Case 56 | 2  | 18,674      | 26,174,103  | 2  | 0 | 2  | 1 |
| Case 56 | 2  | 26,174,659  | 79,509,292  | 2  | 1 | 3  | 0 |
| Case 56 | 2  | 79,516,139  | 79,586,600  | 1  | 0 | 1  | 0 |
| Case 56 | 2  | 79,586,998  | 92,081,640  | 2  | 1 | 3  | 0 |
| Case 56 | 2  | 95,429,424  | 133,392,633 | 2  | 1 | 3  | 0 |
| Case 56 | 2  | 133,396,179 | 133,664,437 | 2  | 0 | 2  | 1 |
| Case 56 | 2  | 133,672,853 | 135,926,351 | 2  | 1 | 3  | 0 |
| Case 56 | 2  | 135,927,428 | 137,573,885 | 3  | 1 | 4  | 0 |
| Case 56 | 2  | 137,580,234 | 140,580,413 | 2  | 1 | 3  | 0 |
| Case 56 | 2  | 140,580,795 | 140,868,186 | 4  | 1 | 5  | 0 |
| Case 56 | 2  | 140,870,484 | 141,407,101 | 7  | 1 | 8  | 0 |
| Case 56 | 2  | 141,407,182 | 141,796,109 | 9  | 1 | 10 | 0 |
| Case 56 | 2  | 141,796,256 | 141,956,759 | 13 | 1 | 14 | 0 |
| Case 56 | 2  | 141,958,235 | 142,094,193 | 10 | 0 | 10 | 1 |

|         |   |             |             |    |   |    |   |
|---------|---|-------------|-------------|----|---|----|---|
| Case 56 | 2 | 142,099,985 | 142,876,051 | 9  | 1 | 10 | 0 |
| Case 56 | 2 | 142,878,411 | 143,508,243 | 10 | 0 | 10 | 1 |
| Case 56 | 2 | 143,512,351 | 144,168,037 | 13 | 0 | 13 | 1 |
| Case 56 | 2 | 144,169,816 | 144,935,972 | 10 | 0 | 10 | 1 |
| Case 56 | 2 | 144,940,576 | 149,988,911 | 1  | 1 | 2  | 0 |
| Case 56 | 2 | 149,999,742 | 150,271,975 | 2  | 1 | 3  | 0 |
| Case 56 | 2 | 150,274,458 | 179,315,726 | 1  | 1 | 2  | 0 |
| Case 56 | 2 | 179,318,222 | 179,515,498 | 7  | 0 | 7  | 1 |
| Case 56 | 2 | 179,515,979 | 179,770,175 | 5  | 0 | 5  | 1 |
| Case 56 | 2 | 179,775,893 | 180,352,334 | 9  | 0 | 9  | 1 |
| Case 56 | 2 | 180,354,642 | 180,446,934 | 11 | 1 | 12 | 0 |
| Case 56 | 2 | 180,449,157 | 180,480,167 | 6  | 1 | 7  | 0 |
| Case 56 | 2 | 180,484,927 | 187,735,749 | 1  | 1 | 2  | 0 |
| Case 56 | 2 | 187,737,712 | 187,830,809 | 10 | 0 | 10 | 1 |
| Case 56 | 2 | 187,833,721 | 188,023,107 | 13 | 0 | 13 | 1 |
| Case 56 | 2 | 188,033,045 | 188,389,326 | 9  | 0 | 9  | 1 |
| Case 56 | 2 | 188,390,819 | 188,554,359 | 13 | 1 | 14 | 0 |
| Case 56 | 2 | 188,573,244 | 188,829,691 | 10 | 1 | 11 | 0 |
| Case 56 | 2 | 188,838,592 | 189,493,686 | 9  | 1 | 10 | 0 |
| Case 56 | 2 | 189,497,420 | 243,048,760 | 1  | 1 | 2  | 0 |
| Case 56 | 3 | 61,495      | 8,528,431   | 2  | 2 | 4  | 0 |
| Case 56 | 3 | 8,533,268   | 10,966,711  | 2  | 1 | 3  | 0 |
| Case 56 | 3 | 10,967,342  | 10,972,387  | 3  | 2 | 5  | 0 |
| Case 56 | 3 | 10,974,051  | 19,306,573  | 2  | 1 | 3  | 0 |
| Case 56 | 3 | 19,309,780  | 39,852,825  | 3  | 0 | 3  | 1 |
| Case 56 | 3 | 39,862,052  | 56,735,180  | 2  | 0 | 2  | 1 |
| Case 56 | 3 | 56,740,101  | 60,254,987  | 2  | 2 | 4  | 0 |
| Case 56 | 3 | 60,256,485  | 60,382,023  | 1  | 0 | 1  | 0 |
| Case 56 | 3 | 60,388,322  | 60,445,253  | 0  | 0 | 0  | 0 |
| Case 56 | 3 | 60,447,369  | 60,512,505  | 1  | 0 | 1  | 0 |
| Case 56 | 3 | 60,512,522  | 60,542,151  | 2  | 1 | 3  | 0 |
| Case 56 | 3 | 60,542,525  | 60,566,492  | 2  | 0 | 2  | 1 |
| Case 56 | 3 | 60,567,102  | 60,607,896  | 2  | 1 | 3  | 0 |
| Case 56 | 3 | 60,610,341  | 60,742,058  | 2  | 2 | 4  | 0 |
| Case 56 | 3 | 60,743,058  | 62,310,359  | 3  | 2 | 5  | 0 |
| Case 56 | 3 | 62,315,312  | 79,819,713  | 2  | 2 | 4  | 0 |
| Case 56 | 3 | 79,824,232  | 81,247,480  | 2  | 0 | 2  | 1 |
| Case 56 | 3 | 81,251,347  | 90,442,925  | 2  | 2 | 4  | 0 |
| Case 56 | 3 | 93,537,290  | 114,081,006 | 2  | 2 | 4  | 0 |
| Case 56 | 3 | 114,085,053 | 114,134,268 | 3  | 3 | 6  | 0 |
| Case 56 | 3 | 114,140,714 | 141,039,107 | 2  | 2 | 4  | 0 |
| Case 56 | 3 | 141,042,222 | 141,610,807 | 3  | 2 | 5  | 0 |
| Case 56 | 3 | 141,621,633 | 153,173,935 | 2  | 2 | 4  | 0 |
| Case 56 | 3 | 153,175,186 | 155,830,631 | 6  | 2 | 8  | 0 |
| Case 56 | 3 | 155,836,231 | 157,250,987 | 6  | 1 | 7  | 0 |
| Case 56 | 3 | 157,251,358 | 157,924,373 | 5  | 2 | 7  | 0 |
| Case 56 | 3 | 157,934,971 | 158,831,718 | 6  | 1 | 7  | 0 |
| Case 56 | 3 | 158,833,189 | 161,994,639 | 5  | 2 | 7  | 0 |
| Case 56 | 3 | 161,997,753 | 162,373,246 | 9  | 2 | 11 | 0 |
| Case 56 | 3 | 162,376,870 | 163,693,304 | 5  | 2 | 7  | 0 |
| Case 56 | 3 | 163,714,630 | 167,696,174 | 9  | 1 | 10 | 0 |
| Case 56 | 3 | 167,696,683 | 169,782,204 | 7  | 1 | 8  | 0 |
| Case 56 | 3 | 169,784,616 | 169,938,890 | 9  | 1 | 10 | 0 |
| Case 56 | 3 | 169,944,100 | 173,967,286 | 6  | 1 | 7  | 0 |
| Case 56 | 3 | 173,971,715 | 174,951,756 | 2  | 0 | 2  | 1 |
| Case 56 | 3 | 174,951,784 | 174,980,057 | 1  | 0 | 1  | 0 |
| Case 56 | 3 | 174,980,714 | 178,397,422 | 3  | 2 | 5  | 0 |
| Case 56 | 3 | 178,397,892 | 179,085,860 | 7  | 1 | 8  | 0 |
| Case 56 | 3 | 179,090,772 | 179,576,912 | 3  | 1 | 4  | 0 |
| Case 56 | 3 | 179,579,536 | 180,291,037 | 8  | 1 | 9  | 0 |
| Case 56 | 3 | 180,293,187 | 181,629,223 | 5  | 1 | 6  | 0 |



|         |   |             |             |   |   |   |   |
|---------|---|-------------|-------------|---|---|---|---|
| Case 56 | 3 | 181,630,286 | 181,862,415 | 8 | 1 | 9 | 0 |
| Case 56 | 3 | 181,908,937 | 182,055,057 | 4 | 1 | 5 | 0 |
| Case 56 | 3 | 182,080,081 | 182,222,315 | 7 | 1 | 8 | 0 |
| Case 56 | 3 | 182,222,834 | 183,730,501 | 5 | 1 | 6 | 0 |
| Case 56 | 3 | 183,730,657 | 185,652,184 | 4 | 1 | 5 | 0 |
| Case 56 | 3 | 185,654,924 | 190,036,105 | 3 | 2 | 5 | 0 |
| Case 56 | 3 | 190,036,418 | 197,838,262 | 2 | 0 | 2 | 1 |
| Case 56 | 4 | 71,566      | 1,588,665   | 3 | 0 | 3 | 1 |
| Case 56 | 4 | 1,598,331   | 20,731,737  | 2 | 0 | 2 | 1 |
| Case 56 | 4 | 20,732,334  | 25,119,575  | 3 | 0 | 3 | 1 |
| Case 56 | 4 | 25,123,344  | 49,620,898  | 2 | 0 | 2 | 1 |
| Case 56 | 4 | 52,697,856  | 91,371,416  | 2 | 0 | 2 | 1 |
| Case 56 | 4 | 91,376,378  | 91,821,398  | 0 | 0 | 0 | 0 |
| Case 56 | 4 | 91,823,910  | 124,177,286 | 2 | 0 | 2 | 1 |
| Case 56 | 4 | 124,177,315 | 124,473,935 | 3 | 0 | 3 | 1 |
| Case 56 | 4 | 124,496,348 | 124,812,897 | 0 | 0 | 0 | 0 |
| Case 56 | 4 | 124,819,109 | 190,963,766 | 2 | 0 | 2 | 1 |
| Case 56 | 5 | 38,139      | 37,552,852  | 2 | 0 | 2 | 1 |
| Case 56 | 5 | 37,556,926  | 38,803,449  | 3 | 0 | 3 | 1 |
| Case 56 | 5 | 38,804,071  | 46,399,093  | 2 | 0 | 2 | 1 |
| Case 56 | 5 | 49,457,282  | 134,305,197 | 2 | 0 | 2 | 1 |
| Case 56 | 5 | 134,305,646 | 180,693,127 | 3 | 0 | 3 | 1 |
| Case 56 | 6 | 108,666     | 1,656,487   | 2 | 1 | 3 | 0 |
| Case 56 | 6 | 1,660,002   | 2,145,447   | 1 | 0 | 1 | 0 |
| Case 56 | 6 | 2,168,338   | 32,632,833  | 2 | 1 | 3 | 0 |
| Case 56 | 6 | 32,634,282  | 32,653,385  | 3 | 1 | 4 | 0 |
| Case 56 | 6 | 32,657,543  | 47,202,564  | 2 | 1 | 3 | 0 |
| Case 56 | 6 | 47,205,912  | 47,563,608  | 2 | 2 | 4 | 0 |
| Case 56 | 6 | 47,563,669  | 58,752,089  | 2 | 1 | 3 | 0 |
| Case 56 | 6 | 61,891,118  | 71,026,324  | 2 | 1 | 3 | 0 |
| Case 56 | 6 | 71,035,791  | 85,876,291  | 2 | 2 | 4 | 0 |
| Case 56 | 6 | 85,880,616  | 86,073,707  | 3 | 2 | 5 | 0 |
| Case 56 | 6 | 86,078,534  | 95,002,441  | 2 | 2 | 4 | 0 |
| Case 56 | 6 | 95,002,750  | 95,147,902  | 2 | 0 | 2 | 1 |
| Case 56 | 6 | 95,147,994  | 95,309,419  | 3 | 1 | 4 | 0 |
| Case 56 | 6 | 95,320,818  | 95,435,352  | 2 | 0 | 2 | 1 |
| Case 56 | 6 | 95,456,914  | 110,622,694 | 2 | 2 | 4 | 0 |
| Case 56 | 6 | 110,628,455 | 110,883,633 | 3 | 2 | 5 | 0 |
| Case 56 | 6 | 110,887,169 | 121,785,691 | 2 | 2 | 4 | 0 |
| Case 56 | 6 | 121,790,990 | 122,396,987 | 4 | 2 | 6 | 0 |
| Case 56 | 6 | 122,410,187 | 146,719,870 | 2 | 2 | 4 | 0 |
| Case 56 | 6 | 146,719,883 | 148,584,115 | 2 | 0 | 2 | 1 |
| Case 56 | 6 | 148,585,295 | 148,785,423 | 0 | 0 | 0 | 0 |
| Case 56 | 6 | 148,787,137 | 154,705,702 | 2 | 0 | 2 | 1 |
| Case 56 | 6 | 154,707,256 | 155,019,223 | 3 | 0 | 3 | 1 |
| Case 56 | 6 | 155,022,713 | 156,766,474 | 2 | 0 | 2 | 1 |
| Case 56 | 6 | 156,769,759 | 157,216,039 | 3 | 0 | 3 | 1 |
| Case 56 | 6 | 157,216,166 | 157,511,343 | 1 | 0 | 1 | 0 |
| Case 56 | 6 | 157,517,337 | 162,820,114 | 2 | 0 | 2 | 1 |
| Case 56 | 6 | 162,828,829 | 163,081,812 | 0 | 0 | 0 | 0 |
| Case 56 | 6 | 163,088,783 | 170,980,171 | 2 | 0 | 2 | 1 |
| Case 56 | 7 | 44,935      | 38,297,145  | 2 | 1 | 3 | 0 |
| Case 56 | 7 | 38,298,285  | 38,358,412  | 3 | 1 | 4 | 0 |
| Case 56 | 7 | 38,358,956  | 58,019,061  | 2 | 1 | 3 | 0 |
| Case 56 | 7 | 61,056,053  | 86,741,039  | 2 | 1 | 3 | 0 |
| Case 56 | 7 | 86,751,525  | 86,820,275  | 2 | 0 | 2 | 1 |
| Case 56 | 7 | 86,821,980  | 90,014,777  | 2 | 1 | 3 | 0 |
| Case 56 | 7 | 90,015,825  | 91,504,058  | 4 | 1 | 5 | 0 |
| Case 56 | 7 | 91,509,551  | 116,552,181 | 2 | 1 | 3 | 0 |
| Case 56 | 7 | 116,558,716 | 116,593,611 | 4 | 1 | 5 | 0 |
| Case 56 | 7 | 116,604,194 | 133,733,917 | 2 | 1 | 3 | 0 |

|         |    |             |             |    |   |    |   |
|---------|----|-------------|-------------|----|---|----|---|
| Case 56 | 7  | 133,735,533 | 133,815,391 | 2  | 0 | 2  | 1 |
| Case 56 | 7  | 133,821,619 | 136,980,174 | 2  | 1 | 3  | 0 |
| Case 56 | 7  | 136,985,504 | 137,004,109 | 3  | 2 | 5  | 0 |
| Case 56 | 7  | 137,005,808 | 157,438,037 | 2  | 1 | 3  | 0 |
| Case 56 | 7  | 157,449,078 | 157,495,354 | 1  | 1 | 2  | 0 |
| Case 56 | 7  | 157,495,783 | 158,064,729 | 2  | 1 | 3  | 0 |
| Case 56 | 7  | 158,071,511 | 158,393,488 | 1  | 1 | 2  | 0 |
| Case 56 | 7  | 158,395,372 | 159,119,486 | 2  | 1 | 3  | 0 |
| Case 56 | 8  | 164,984     | 43,791,691  | 2  | 0 | 2  | 1 |
| Case 56 | 8  | 46,886,735  | 55,143,250  | 2  | 0 | 2  | 1 |
| Case 56 | 8  | 55,155,640  | 55,347,438  | 3  | 0 | 3  | 1 |
| Case 56 | 8  | 55,355,086  | 126,230,230 | 2  | 0 | 2  | 1 |
| Case 56 | 8  | 126,254,259 | 126,798,409 | 11 | 0 | 11 | 1 |
| Case 56 | 8  | 126,799,011 | 127,575,580 | 13 | 0 | 13 | 1 |
| Case 56 | 8  | 127,575,595 | 127,901,649 | 11 | 0 | 11 | 1 |
| Case 56 | 8  | 127,902,003 | 128,084,539 | 14 | 0 | 14 | 1 |
| Case 56 | 8  | 128,093,277 | 128,818,308 | 11 | 0 | 11 | 1 |
| Case 56 | 8  | 128,822,709 | 129,205,610 | 9  | 0 | 9  | 1 |
| Case 56 | 8  | 129,215,846 | 129,306,423 | 12 | 0 | 12 | 1 |
| Case 56 | 8  | 129,309,414 | 130,545,445 | 10 | 0 | 10 | 1 |
| Case 56 | 8  | 130,547,253 | 132,238,169 | 8  | 0 | 8  | 1 |
| Case 56 | 8  | 132,250,643 | 132,789,352 | 11 | 0 | 11 | 1 |
| Case 56 | 8  | 132,790,095 | 133,931,769 | 9  | 0 | 9  | 1 |
| Case 56 | 8  | 133,935,591 | 146,293,414 | 2  | 0 | 2  | 1 |
| Case 56 | 9  | 46,587      | 8,636,818   | 2  | 0 | 2  | 1 |
| Case 56 | 9  | 8,645,448   | 8,799,819   | 0  | 0 | 0  | 0 |
| Case 56 | 9  | 8,805,462   | 9,195,415   | 2  | 0 | 2  | 1 |
| Case 56 | 9  | 9,195,670   | 9,252,865   | 1  | 0 | 1  | 0 |
| Case 56 | 9  | 9,258,729   | 9,389,169   | 0  | 0 | 0  | 0 |
| Case 56 | 9  | 9,389,992   | 9,600,700   | 1  | 0 | 1  | 0 |
| Case 56 | 9  | 9,602,686   | 9,751,345   | 0  | 0 | 0  | 0 |
| Case 56 | 9  | 9,756,868   | 46,944,322  | 2  | 0 | 2  | 1 |
| Case 56 | 9  | 65,629,772  | 94,455,171  | 2  | 0 | 2  | 1 |
| Case 56 | 9  | 94,456,714  | 94,944,778  | 3  | 0 | 3  | 1 |
| Case 56 | 9  | 94,947,595  | 110,383,583 | 2  | 0 | 2  | 1 |
| Case 56 | 9  | 110,384,379 | 112,929,130 | 3  | 0 | 3  | 1 |
| Case 56 | 9  | 112,931,646 | 116,535,326 | 2  | 0 | 2  | 1 |
| Case 56 | 9  | 116,535,410 | 123,822,837 | 3  | 0 | 3  | 1 |
| Case 56 | 9  | 123,823,972 | 141,066,491 | 2  | 0 | 2  | 1 |
| Case 56 | 10 | 98,087      | 37,327,040  | 2  | 0 | 2  | 1 |
| Case 56 | 10 | 37,341,389  | 37,790,656  | 5  | 2 | 7  | 0 |
| Case 56 | 10 | 37,802,532  | 38,001,300  | 9  | 1 | 10 | 0 |
| Case 56 | 10 | 38,030,639  | 38,276,810  | 5  | 0 | 5  | 1 |
| Case 56 | 10 | 38,290,878  | 38,417,193  | 15 | 0 | 15 | 1 |
| Case 56 | 10 | 38,434,090  | 38,672,399  | 11 | 0 | 11 | 1 |
| Case 56 | 10 | 38,674,609  | 39,097,912  | 17 | 6 | 23 | 0 |
| Case 56 | 10 | 42,436,301  | 42,436,301  | 17 | 6 | 23 | 0 |
| Case 56 | 10 | 42,444,619  | 84,179,887  | 2  | 1 | 3  | 0 |
| Case 56 | 10 | 84,179,976  | 84,279,949  | 1  | 0 | 1  | 0 |
| Case 56 | 10 | 84,303,712  | 85,445,507  | 2  | 1 | 3  | 0 |
| Case 56 | 10 | 85,449,661  | 86,820,708  | 1  | 0 | 1  | 0 |
| Case 56 | 10 | 86,837,430  | 89,292,637  | 2  | 0 | 2  | 1 |
| Case 56 | 10 | 89,294,408  | 90,269,567  | 0  | 0 | 0  | 0 |
| Case 56 | 10 | 90,278,656  | 98,103,376  | 1  | 0 | 1  | 0 |
| Case 56 | 10 | 98,104,703  | 135,477,883 | 2  | 1 | 3  | 0 |
| Case 56 | 11 | 193,146     | 51,591,253  | 2  | 0 | 2  | 1 |
| Case 56 | 11 | 54,794,237  | 74,050,173  | 2  | 0 | 2  | 1 |
| Case 56 | 11 | 74,053,547  | 84,474,461  | 2  | 2 | 4  | 0 |
| Case 56 | 11 | 84,494,810  | 84,688,062  | 2  | 1 | 3  | 0 |
| Case 56 | 11 | 84,691,990  | 87,533,352  | 2  | 2 | 4  | 0 |
| Case 56 | 11 | 87,536,422  | 87,572,333  | 3  | 2 | 5  | 0 |

|         |    |             |             |    |   |    |   |
|---------|----|-------------|-------------|----|---|----|---|
| Case 56 | 11 | 87,572,490  | 134,934,063 | 2  | 2 | 4  | 0 |
| Case 56 | 12 | 191,619     | 18,128,339  | 2  | 0 | 2  | 1 |
| Case 56 | 12 | 18,137,158  | 18,463,451  | 4  | 0 | 4  | 1 |
| Case 56 | 12 | 18,463,609  | 27,416,768  | 2  | 0 | 2  | 1 |
| Case 56 | 12 | 27,422,886  | 27,533,367  | 5  | 1 | 6  | 0 |
| Case 56 | 12 | 27,536,031  | 30,010,180  | 4  | 2 | 6  | 0 |
| Case 56 | 12 | 30,013,127  | 34,853,011  | 2  | 2 | 4  | 0 |
| Case 56 | 12 | 37,876,400  | 42,030,041  | 2  | 2 | 4  | 0 |
| Case 56 | 12 | 42,038,171  | 42,244,754  | 2  | 1 | 3  | 0 |
| Case 56 | 12 | 42,246,534  | 65,677,700  | 2  | 2 | 4  | 0 |
| Case 56 | 12 | 65,680,026  | 67,007,144  | 2  | 0 | 2  | 1 |
| Case 56 | 12 | 67,009,240  | 68,652,532  | 2  | 2 | 4  | 0 |
| Case 56 | 12 | 68,654,215  | 74,596,252  | 2  | 0 | 2  | 1 |
| Case 56 | 12 | 74,601,949  | 86,518,790  | 2  | 2 | 4  | 0 |
| Case 56 | 12 | 86,529,854  | 86,779,667  | 2  | 1 | 3  | 0 |
| Case 56 | 12 | 86,809,606  | 87,064,494  | 2  | 0 | 2  | 1 |
| Case 56 | 12 | 87,070,220  | 87,414,468  | 3  | 1 | 4  | 0 |
| Case 56 | 12 | 87,430,209  | 88,381,701  | 2  | 0 | 2  | 1 |
| Case 56 | 12 | 88,383,119  | 90,295,893  | 2  | 2 | 4  | 0 |
| Case 56 | 12 | 90,304,545  | 93,125,065  | 2  | 0 | 2  | 1 |
| Case 56 | 12 | 93,128,881  | 95,927,666  | 2  | 2 | 4  | 0 |
| Case 56 | 12 | 95,927,762  | 95,995,906  | 3  | 2 | 5  | 0 |
| Case 56 | 12 | 96,000,467  | 97,579,740  | 2  | 2 | 4  | 0 |
| Case 56 | 12 | 97,588,017  | 98,551,559  | 2  | 0 | 2  | 1 |
| Case 56 | 12 | 98,552,353  | 128,767,084 | 2  | 2 | 4  | 0 |
| Case 56 | 12 | 128,768,870 | 132,405,748 | 2  | 0 | 2  | 1 |
| Case 56 | 12 | 132,405,765 | 133,810,935 | 2  | 1 | 3  | 0 |
| Case 56 | 13 | 19,058,717  | 21,725,633  | 2  | 0 | 2  | 1 |
| Case 56 | 13 | 21,728,755  | 21,746,637  | 3  | 1 | 4  | 0 |
| Case 56 | 13 | 21,747,051  | 115,103,529 | 2  | 0 | 2  | 1 |
| Case 56 | 14 | 19,280,733  | 20,420,338  | 3  | 1 | 4  | 0 |
| Case 56 | 14 | 20,425,051  | 22,586,162  | 2  | 2 | 4  | 0 |
| Case 56 | 14 | 22,586,392  | 22,964,782  | 3  | 2 | 5  | 0 |
| Case 56 | 14 | 22,966,662  | 74,212,431  | 2  | 2 | 4  | 0 |
| Case 56 | 14 | 74,213,366  | 74,250,715  | 2  | 1 | 3  | 0 |
| Case 56 | 14 | 74,252,993  | 104,839,816 | 2  | 2 | 4  | 0 |
| Case 56 | 14 | 104,839,937 | 107,287,663 | 2  | 1 | 3  | 0 |
| Case 56 | 15 | 20,034,919  | 38,985,513  | 1  | 1 | 2  | 0 |
| Case 56 | 15 | 38,986,368  | 39,188,421  | 2  | 1 | 3  | 0 |
| Case 56 | 15 | 39,191,412  | 66,813,446  | 1  | 1 | 2  | 0 |
| Case 56 | 15 | 66,813,452  | 66,921,642  | 2  | 1 | 3  | 0 |
| Case 56 | 15 | 66,924,801  | 88,272,469  | 1  | 1 | 2  | 0 |
| Case 56 | 15 | 88,276,056  | 102,461,162 | 2  | 1 | 3  | 0 |
| Case 56 | 16 | 88,165      | 13,241,955  | 3  | 0 | 3  | 1 |
| Case 56 | 16 | 13,246,786  | 13,665,563  | 4  | 0 | 4  | 1 |
| Case 56 | 16 | 13,666,011  | 35,285,582  | 3  | 0 | 3  | 1 |
| Case 56 | 16 | 46,450,037  | 56,040,044  | 3  | 0 | 3  | 1 |
| Case 56 | 16 | 56,042,683  | 56,066,749  | 4  | 0 | 4  | 1 |
| Case 56 | 16 | 56,072,907  | 64,829,567  | 3  | 0 | 3  | 1 |
| Case 56 | 16 | 64,835,827  | 64,877,700  | 4  | 0 | 4  | 1 |
| Case 56 | 16 | 64,883,464  | 78,283,848  | 3  | 0 | 3  | 1 |
| Case 56 | 16 | 78,284,812  | 78,343,690  | 2  | 0 | 2  | 1 |
| Case 56 | 16 | 78,343,738  | 78,790,765  | 3  | 0 | 3  | 1 |
| Case 56 | 16 | 78,797,412  | 78,899,407  | 2  | 0 | 2  | 1 |
| Case 56 | 16 | 78,900,527  | 90,274,695  | 3  | 0 | 3  | 1 |
| Case 56 | 17 | 11,885      | 22,242,355  | 2  | 0 | 2  | 1 |
| Case 56 | 17 | 25,268,142  | 27,076,072  | 2  | 0 | 2  | 1 |
| Case 56 | 17 | 27,076,453  | 27,228,076  | 11 | 0 | 11 | 1 |
| Case 56 | 17 | 27,228,118  | 27,286,753  | 8  | 0 | 8  | 1 |
| Case 56 | 17 | 27,286,851  | 27,438,782  | 2  | 0 | 2  | 1 |
| Case 56 | 17 | 27,442,042  | 27,881,366  | 11 | 1 | 12 | 0 |

|         |    |            |            |    |   |    |   |
|---------|----|------------|------------|----|---|----|---|
| Case 56 | 17 | 27,882,058 | 27,911,557 | 8  | 2 | 10 | 0 |
| Case 56 | 17 | 27,917,771 | 34,436,708 | 2  | 0 | 2  | 1 |
| Case 56 | 17 | 34,443,811 | 34,461,869 | 3  | 1 | 4  | 0 |
| Case 56 | 17 | 34,462,907 | 35,632,979 | 3  | 0 | 3  | 1 |
| Case 56 | 17 | 35,634,023 | 35,736,240 | 2  | 0 | 2  | 1 |
| Case 56 | 17 | 35,740,855 | 36,045,807 | 10 | 1 | 11 | 0 |
| Case 56 | 17 | 36,046,598 | 36,131,437 | 8  | 1 | 9  | 0 |
| Case 56 | 17 | 36,133,614 | 36,593,981 | 2  | 0 | 2  | 1 |
| Case 56 | 17 | 36,600,731 | 36,813,346 | 9  | 2 | 11 | 0 |
| Case 56 | 17 | 36,823,942 | 37,646,866 | 2  | 0 | 2  | 1 |
| Case 56 | 17 | 37,668,488 | 37,985,732 | 11 | 2 | 13 | 0 |
| Case 56 | 17 | 38,010,815 | 49,168,871 | 2  | 0 | 2  | 1 |
| Case 56 | 17 | 49,171,414 | 50,799,903 | 3  | 0 | 3  | 1 |
| Case 56 | 17 | 50,801,156 | 59,544,810 | 2  | 0 | 2  | 1 |
| Case 56 | 17 | 59,544,863 | 70,441,787 | 3  | 0 | 3  | 1 |
| Case 56 | 17 | 70,445,988 | 81,060,040 | 2  | 0 | 2  | 1 |
| Case 56 | 18 | 87,505     | 2,926,791  | 2  | 0 | 2  | 1 |
| Case 56 | 18 | 2,927,023  | 3,246,824  | 3  | 0 | 3  | 1 |
| Case 56 | 18 | 3,247,256  | 15,375,878 | 2  | 0 | 2  | 1 |
| Case 56 | 18 | 18,520,354 | 18,550,415 | 2  | 0 | 2  | 1 |
| Case 56 | 18 | 18,556,505 | 19,814,796 | 2  | 2 | 4  | 0 |
| Case 56 | 18 | 19,823,874 | 19,930,691 | 9  | 2 | 11 | 0 |
| Case 56 | 18 | 19,938,098 | 20,002,116 | 13 | 4 | 17 | 0 |
| Case 56 | 18 | 20,003,666 | 20,066,155 | 11 | 3 | 14 | 0 |
| Case 56 | 18 | 20,072,571 | 20,768,822 | 2  | 1 | 3  | 0 |
| Case 56 | 18 | 20,768,870 | 78,015,180 | 2  | 0 | 2  | 1 |
| Case 56 | 19 | 260,912    | 14,997,021 | 2  | 1 | 3  | 0 |
| Case 56 | 19 | 14,997,144 | 15,995,902 | 2  | 2 | 4  | 0 |
| Case 56 | 19 | 15,995,974 | 19,859,845 | 2  | 1 | 3  | 0 |
| Case 56 | 19 | 19,860,495 | 24,629,285 | 2  | 2 | 4  | 0 |
| Case 56 | 19 | 27,732,159 | 27,978,445 | 2  | 2 | 4  | 0 |
| Case 56 | 19 | 27,983,651 | 35,416,794 | 4  | 1 | 5  | 0 |
| Case 56 | 19 | 35,418,092 | 36,900,778 | 3  | 1 | 4  | 0 |
| Case 56 | 19 | 36,902,219 | 38,378,669 | 4  | 1 | 5  | 0 |
| Case 56 | 19 | 38,379,446 | 48,263,635 | 3  | 1 | 4  | 0 |
| Case 56 | 19 | 48,266,211 | 48,286,163 | 4  | 1 | 5  | 0 |
| Case 56 | 19 | 48,289,303 | 59,097,160 | 3  | 1 | 4  | 0 |
| Case 56 | 20 | 63,244     | 14,550,380 | 2  | 2 | 4  | 0 |
| Case 56 | 20 | 14,553,745 | 14,713,890 | 2  | 1 | 3  | 0 |
| Case 56 | 20 | 14,714,457 | 14,827,620 | 0  | 0 | 0  | 0 |
| Case 56 | 20 | 14,833,762 | 14,939,688 | 1  | 0 | 1  | 0 |
| Case 56 | 20 | 14,949,763 | 15,041,578 | 2  | 0 | 2  | 1 |
| Case 56 | 20 | 15,042,599 | 15,179,023 | 0  | 0 | 0  | 0 |
| Case 56 | 20 | 15,180,181 | 15,424,659 | 2  | 0 | 2  | 1 |
| Case 56 | 20 | 15,428,111 | 15,455,573 | 3  | 0 | 3  | 1 |
| Case 56 | 20 | 15,461,606 | 26,293,985 | 2  | 2 | 4  | 0 |
| Case 56 | 20 | 29,425,357 | 51,240,495 | 2  | 2 | 4  | 0 |
| Case 56 | 20 | 51,245,688 | 51,576,180 | 3  | 2 | 5  | 0 |
| Case 56 | 20 | 51,576,258 | 62,948,788 | 2  | 2 | 4  | 0 |
| Case 56 | 21 | 10,827,533 | 10,971,337 | 2  | 1 | 3  | 0 |
| Case 56 | 21 | 14,368,320 | 15,173,846 | 2  | 1 | 3  | 0 |
| Case 56 | 21 | 15,181,318 | 29,512,586 | 2  | 2 | 4  | 0 |
| Case 56 | 21 | 29,514,609 | 29,761,607 | 2  | 1 | 3  | 0 |
| Case 56 | 21 | 29,761,664 | 35,900,759 | 2  | 2 | 4  | 0 |
| Case 56 | 21 | 35,901,290 | 36,235,568 | 3  | 2 | 5  | 0 |
| Case 56 | 21 | 36,235,739 | 43,698,255 | 2  | 2 | 4  | 0 |
| Case 56 | 21 | 43,698,815 | 48,100,155 | 2  | 1 | 3  | 0 |
| Case 56 | 22 | 16,114,244 | 17,196,300 | 3  | 1 | 4  | 0 |
| Case 56 | 22 | 17,202,602 | 24,643,609 | 2  | 2 | 4  | 0 |
| Case 56 | 22 | 24,666,340 | 36,681,272 | 2  | 1 | 3  | 0 |
| Case 56 | 22 | 36,681,327 | 36,755,498 | 2  | 0 | 2  | 1 |

|         |    |             |             |   |   |   |   |
|---------|----|-------------|-------------|---|---|---|---|
| Case 56 | 22 | 36,758,258  | 42,149,994  | 2 | 1 | 3 | 0 |
| Case 56 | 22 | 42,151,555  | 43,041,545  | 2 | 2 | 4 | 0 |
| Case 56 | 22 | 43,049,014  | 43,112,475  | 3 | 2 | 5 | 0 |
| Case 56 | 22 | 43,112,961  | 47,370,060  | 2 | 1 | 3 | 0 |
| Case 56 | 22 | 47,370,218  | 49,932,767  | 2 | 2 | 4 | 0 |
| Case 56 | 22 | 49,939,309  | 51,195,728  | 2 | 1 | 3 | 0 |
| Case 56 | X  | 2,700,157   | 31,793,720  | 2 | 0 | 2 | 1 |
| Case 56 | X  | 31,799,438  | 31,983,162  | 0 | 0 | 0 | 0 |
| Case 56 | X  | 31,986,430  | 58,488,110  | 2 | 0 | 2 | 1 |
| Case 56 | X  | 61,694,576  | 91,640,119  | 2 | 0 | 2 | 1 |
| Case 56 | X  | 91,641,904  | 154,898,561 | 1 | 1 | 2 | 0 |
| Case 59 | 1  | 82,154      | 4,007,110   | 1 | 1 | 2 | 0 |
| Case 59 | 1  | 4,007,558   | 4,206,210   | 1 | 0 | 1 | 0 |
| Case 59 | 1  | 4,208,542   | 4,366,890   | 1 | 1 | 2 | 0 |
| Case 59 | 1  | 4,367,323   | 5,926,503   | 1 | 0 | 1 | 0 |
| Case 59 | 1  | 5,926,507   | 35,444,037  | 1 | 1 | 2 | 0 |
| Case 59 | 1  | 35,446,830  | 35,648,316  | 2 | 1 | 3 | 0 |
| Case 59 | 1  | 35,651,963  | 63,805,129  | 1 | 1 | 2 | 0 |
| Case 59 | 1  | 63,818,393  | 64,056,411  | 2 | 1 | 3 | 0 |
| Case 59 | 1  | 64,059,266  | 121,346,616 | 1 | 1 | 2 | 0 |
| Case 59 | 1  | 142,649,718 | 157,879,145 | 2 | 1 | 3 | 0 |
| Case 59 | 1  | 157,879,294 | 158,763,983 | 1 | 1 | 2 | 0 |
| Case 59 | 1  | 158,772,845 | 202,702,918 | 2 | 1 | 3 | 0 |
| Case 59 | 1  | 202,704,613 | 237,089,660 | 3 | 0 | 3 | 1 |
| Case 59 | 1  | 237,093,381 | 237,303,417 | 2 | 0 | 2 | 1 |
| Case 59 | 1  | 237,303,919 | 247,577,079 | 3 | 0 | 3 | 1 |
| Case 59 | 1  | 247,578,441 | 249,218,992 | 2 | 0 | 2 | 1 |
| Case 59 | 2  | 18,674      | 39,443,569  | 1 | 1 | 2 | 0 |
| Case 59 | 2  | 39,453,469  | 39,602,950  | 2 | 1 | 3 | 0 |
| Case 59 | 2  | 39,604,876  | 70,074,721  | 1 | 1 | 2 | 0 |
| Case 59 | 2  | 70,074,757  | 70,159,444  | 2 | 1 | 3 | 0 |
| Case 59 | 2  | 70,163,434  | 77,047,442  | 1 | 1 | 2 | 0 |
| Case 59 | 2  | 77,048,896  | 77,082,852  | 2 | 1 | 3 | 0 |
| Case 59 | 2  | 77,082,875  | 92,081,640  | 1 | 1 | 2 | 0 |
| Case 59 | 2  | 95,429,424  | 184,933,453 | 1 | 1 | 2 | 0 |
| Case 59 | 2  | 184,941,469 | 184,967,629 | 2 | 1 | 3 | 0 |
| Case 59 | 2  | 184,971,481 | 238,672,703 | 1 | 1 | 2 | 0 |
| Case 59 | 2  | 238,673,436 | 238,746,880 | 2 | 1 | 3 | 0 |
| Case 59 | 2  | 238,760,118 | 243,048,760 | 1 | 1 | 2 | 0 |
| Case 59 | 3  | 61,495      | 4,414,011   | 2 | 0 | 2 | 1 |
| Case 59 | 3  | 4,415,276   | 4,437,484   | 3 | 0 | 3 | 1 |
| Case 59 | 3  | 4,445,436   | 57,401,178  | 2 | 0 | 2 | 1 |
| Case 59 | 3  | 57,401,266  | 57,523,831  | 3 | 0 | 3 | 1 |
| Case 59 | 3  | 57,524,818  | 60,167,219  | 2 | 0 | 2 | 1 |
| Case 59 | 3  | 60,170,083  | 60,531,242  | 0 | 0 | 0 | 0 |
| Case 59 | 3  | 60,536,420  | 60,708,889  | 2 | 1 | 3 | 0 |
| Case 59 | 3  | 60,711,659  | 60,844,642  | 0 | 0 | 0 | 0 |
| Case 59 | 3  | 60,853,686  | 60,922,084  | 2 | 1 | 3 | 0 |
| Case 59 | 3  | 60,931,990  | 61,232,197  | 0 | 0 | 0 | 0 |
| Case 59 | 3  | 61,236,328  | 90,442,925  | 2 | 0 | 2 | 1 |
| Case 59 | 3  | 93,537,290  | 176,715,918 | 2 | 0 | 2 | 1 |
| Case 59 | 3  | 176,720,780 | 176,824,755 | 3 | 0 | 3 | 1 |
| Case 59 | 3  | 176,827,927 | 189,119,792 | 2 | 0 | 2 | 1 |
| Case 59 | 3  | 189,120,128 | 189,148,163 | 3 | 0 | 3 | 1 |
| Case 59 | 3  | 189,148,605 | 197,838,262 | 2 | 0 | 2 | 1 |
| Case 59 | 4  | 71,566      | 832,610     | 1 | 1 | 2 | 0 |
| Case 59 | 4  | 843,184     | 2,252,824   | 2 | 1 | 3 | 0 |
| Case 59 | 4  | 2,252,881   | 49,620,898  | 1 | 1 | 2 | 0 |
| Case 59 | 4  | 52,697,856  | 190,963,766 | 1 | 1 | 2 | 0 |
| Case 59 | 5  | 38,139      | 18,852,401  | 1 | 1 | 2 | 0 |
| Case 59 | 5  | 18,853,732  | 18,877,165  | 2 | 2 | 4 | 0 |

|         |    |             |             |   |   |   |   |
|---------|----|-------------|-------------|---|---|---|---|
| Case 59 | 5  | 18,879,807  | 46,117,770  | 1 | 1 | 2 | 0 |
| Case 59 | 5  | 46,127,095  | 46,399,093  | 1 | 0 | 1 | 0 |
| Case 59 | 5  | 49,457,282  | 49,564,798  | 1 | 0 | 1 | 0 |
| Case 59 | 5  | 49,586,870  | 104,456,200 | 1 | 1 | 2 | 0 |
| Case 59 | 5  | 104,458,953 | 104,970,881 | 2 | 1 | 3 | 0 |
| Case 59 | 5  | 104,976,152 | 135,272,418 | 1 | 1 | 2 | 0 |
| Case 59 | 5  | 135,272,474 | 135,280,552 | 2 | 1 | 3 | 0 |
| Case 59 | 5  | 135,282,514 | 150,102,470 | 1 | 1 | 2 | 0 |
| Case 59 | 5  | 150,107,876 | 150,376,966 | 2 | 1 | 3 | 0 |
| Case 59 | 5  | 150,381,243 | 180,693,127 | 1 | 1 | 2 | 0 |
| Case 59 | 6  | 108,666     | 32,215,876  | 1 | 1 | 2 | 0 |
| Case 59 | 6  | 32,216,793  | 32,349,946  | 2 | 1 | 3 | 0 |
| Case 59 | 6  | 32,350,454  | 32,865,997  | 1 | 1 | 2 | 0 |
| Case 59 | 6  | 32,867,123  | 32,877,073  | 2 | 1 | 3 | 0 |
| Case 59 | 6  | 32,877,173  | 44,951,990  | 1 | 1 | 2 | 0 |
| Case 59 | 6  | 44,955,528  | 45,059,674  | 2 | 1 | 3 | 0 |
| Case 59 | 6  | 45,075,795  | 58,752,089  | 1 | 1 | 2 | 0 |
| Case 59 | 6  | 61,891,118  | 170,980,171 | 1 | 1 | 2 | 0 |
| Case 59 | 7  | 44,935      | 4,408,299   | 2 | 1 | 3 | 0 |
| Case 59 | 7  | 4,409,754   | 4,413,313   | 3 | 1 | 4 | 0 |
| Case 59 | 7  | 4,414,803   | 57,839,005  | 2 | 1 | 3 | 0 |
| Case 59 | 7  | 57,877,485  | 58,019,061  | 1 | 1 | 2 | 0 |
| Case 59 | 7  | 61,056,053  | 62,397,642  | 1 | 1 | 2 | 0 |
| Case 59 | 7  | 62,413,547  | 159,119,486 | 2 | 1 | 3 | 0 |
| Case 59 | 8  | 164,984     | 43,791,691  | 2 | 1 | 3 | 0 |
| Case 59 | 8  | 46,886,735  | 104,924,389 | 2 | 1 | 3 | 0 |
| Case 59 | 8  | 104,925,755 | 105,211,090 | 3 | 1 | 4 | 0 |
| Case 59 | 8  | 105,216,321 | 146,293,414 | 2 | 1 | 3 | 0 |
| Case 59 | 9  | 46,587      | 15,571,630  | 1 | 1 | 2 | 0 |
| Case 59 | 9  | 15,571,755  | 15,997,006  | 2 | 1 | 3 | 0 |
| Case 59 | 9  | 16,003,441  | 46,944,322  | 1 | 1 | 2 | 0 |
| Case 59 | 9  | 65,629,772  | 98,603,006  | 1 | 1 | 2 | 0 |
| Case 59 | 9  | 98,607,989  | 98,739,498  | 2 | 1 | 3 | 0 |
| Case 59 | 9  | 98,745,485  | 99,581,343  | 1 | 1 | 2 | 0 |
| Case 59 | 9  | 99,581,344  | 99,792,208  | 2 | 1 | 3 | 0 |
| Case 59 | 9  | 99,793,583  | 138,911,484 | 1 | 1 | 2 | 0 |
| Case 59 | 9  | 138,913,314 | 140,435,094 | 2 | 1 | 3 | 0 |
| Case 59 | 9  | 140,435,171 | 141,066,491 | 1 | 1 | 2 | 0 |
| Case 59 | 10 | 98,087      | 39,097,912  | 2 | 0 | 2 | 1 |
| Case 59 | 10 | 42,436,301  | 75,893,890  | 2 | 0 | 2 | 1 |
| Case 59 | 10 | 75,896,420  | 76,757,407  | 3 | 0 | 3 | 1 |
| Case 59 | 10 | 76,760,631  | 91,465,167  | 2 | 0 | 2 | 1 |
| Case 59 | 10 | 91,468,925  | 91,553,642  | 3 | 0 | 3 | 1 |
| Case 59 | 10 | 91,565,990  | 95,426,888  | 2 | 0 | 2 | 1 |
| Case 59 | 10 | 95,427,281  | 95,458,872  | 3 | 0 | 3 | 1 |
| Case 59 | 10 | 95,458,897  | 135,477,883 | 2 | 0 | 2 | 1 |
| Case 59 | 11 | 193,146     | 715,420     | 1 | 1 | 2 | 0 |
| Case 59 | 11 | 716,765     | 1,647,110   | 2 | 1 | 3 | 0 |
| Case 59 | 11 | 1,649,822   | 2,612,561   | 1 | 1 | 2 | 0 |
| Case 59 | 11 | 2,617,782   | 2,663,891   | 2 | 2 | 4 | 0 |
| Case 59 | 11 | 2,673,575   | 5,091,633   | 1 | 1 | 2 | 0 |
| Case 59 | 11 | 5,091,882   | 5,115,856   | 2 | 1 | 3 | 0 |
| Case 59 | 11 | 5,116,109   | 11,844,516  | 1 | 1 | 2 | 0 |
| Case 59 | 11 | 11,848,522  | 11,980,251  | 2 | 1 | 3 | 0 |
| Case 59 | 11 | 11,980,397  | 51,591,253  | 1 | 1 | 2 | 0 |
| Case 59 | 11 | 54,794,237  | 68,291,116  | 1 | 1 | 2 | 0 |
| Case 59 | 11 | 68,292,930  | 68,387,984  | 2 | 1 | 3 | 0 |
| Case 59 | 11 | 68,388,567  | 74,043,171  | 1 | 1 | 2 | 0 |
| Case 59 | 11 | 74,043,708  | 74,099,892  | 2 | 1 | 3 | 0 |
| Case 59 | 11 | 74,105,105  | 134,934,063 | 1 | 1 | 2 | 0 |
| Case 59 | 12 | 191,619     | 34,853,011  | 1 | 1 | 2 | 0 |

|         |    |             |             |   |   |   |   |
|---------|----|-------------|-------------|---|---|---|---|
| Case 59 | 12 | 37,876,400  | 105,247,010 | 1 | 1 | 2 | 0 |
| Case 59 | 12 | 105,259,244 | 105,346,800 | 2 | 1 | 3 | 0 |
| Case 59 | 12 | 105,353,244 | 109,781,415 | 1 | 1 | 2 | 0 |
| Case 59 | 12 | 109,781,567 | 109,888,592 | 2 | 1 | 3 | 0 |
| Case 59 | 12 | 109,888,779 | 133,810,935 | 1 | 1 | 2 | 0 |
| Case 59 | 13 | 19,058,717  | 114,079,673 | 1 | 1 | 2 | 0 |
| Case 59 | 13 | 114,081,403 | 114,092,549 | 2 | 1 | 3 | 0 |
| Case 59 | 13 | 114,096,842 | 115,103,529 | 1 | 1 | 2 | 0 |
| Case 59 | 14 | 19,280,733  | 104,865,071 | 1 | 1 | 2 | 0 |
| Case 59 | 14 | 104,866,687 | 106,067,618 | 2 | 1 | 3 | 0 |
| Case 59 | 14 | 106,072,470 | 107,287,663 | 1 | 1 | 2 | 0 |
| Case 59 | 15 | 20,034,919  | 62,125,968  | 1 | 1 | 2 | 0 |
| Case 59 | 15 | 62,128,861  | 62,358,682  | 2 | 1 | 3 | 0 |
| Case 59 | 15 | 62,359,350  | 100,890,834 | 1 | 1 | 2 | 0 |
| Case 59 | 15 | 100,912,913 | 101,147,726 | 2 | 1 | 3 | 0 |
| Case 59 | 15 | 101,156,623 | 102,461,162 | 1 | 1 | 2 | 0 |
| Case 59 | 16 | 88,165      | 35,285,582  | 1 | 1 | 2 | 0 |
| Case 59 | 16 | 46,450,037  | 50,777,302  | 1 | 1 | 2 | 0 |
| Case 59 | 16 | 50,785,524  | 50,825,459  | 2 | 1 | 3 | 0 |
| Case 59 | 16 | 50,827,518  | 81,009,899  | 1 | 1 | 2 | 0 |
| Case 59 | 16 | 81,010,073  | 81,076,066  | 2 | 1 | 3 | 0 |
| Case 59 | 16 | 81,076,821  | 90,274,695  | 1 | 1 | 2 | 0 |
| Case 59 | 17 | 11,885      | 17,433,959  | 2 | 0 | 2 | 1 |
| Case 59 | 17 | 17,439,458  | 22,242,355  | 1 | 1 | 2 | 0 |
| Case 59 | 17 | 25,268,142  | 27,493,366  | 1 | 1 | 2 | 0 |
| Case 59 | 17 | 27,499,140  | 29,431,407  | 2 | 0 | 2 | 1 |
| Case 59 | 17 | 29,470,002  | 29,717,959  | 3 | 0 | 3 | 1 |
| Case 59 | 17 | 29,720,140  | 45,412,575  | 2 | 0 | 2 | 1 |
| Case 59 | 17 | 45,412,629  | 45,764,692  | 3 | 0 | 3 | 1 |
| Case 59 | 17 | 45,768,836  | 74,636,253  | 2 | 0 | 2 | 1 |
| Case 59 | 17 | 74,637,881  | 74,661,436  | 3 | 0 | 3 | 1 |
| Case 59 | 17 | 74,662,054  | 81,060,040  | 2 | 0 | 2 | 1 |
| Case 59 | 18 | 87,505      | 9,109,484   | 1 | 1 | 2 | 0 |
| Case 59 | 18 | 9,114,096   | 9,367,390   | 2 | 1 | 3 | 0 |
| Case 59 | 18 | 9,376,494   | 15,375,878  | 1 | 1 | 2 | 0 |
| Case 59 | 18 | 18,520,354  | 76,817,189  | 1 | 1 | 2 | 0 |
| Case 59 | 18 | 76,820,697  | 77,027,258  | 2 | 1 | 3 | 0 |
| Case 59 | 18 | 77,030,000  | 78,015,180  | 1 | 1 | 2 | 0 |
| Case 59 | 19 | 260,912     | 620,393     | 1 | 1 | 2 | 0 |
| Case 59 | 19 | 622,193     | 1,937,457   | 2 | 1 | 3 | 0 |
| Case 59 | 19 | 1,952,586   | 15,772,530  | 1 | 1 | 2 | 0 |
| Case 59 | 19 | 15,772,548  | 15,774,241  | 2 | 1 | 3 | 0 |
| Case 59 | 19 | 15,774,605  | 24,629,285  | 1 | 1 | 2 | 0 |
| Case 59 | 19 | 27,732,159  | 30,457,988  | 1 | 1 | 2 | 0 |
| Case 59 | 19 | 30,465,196  | 30,539,739  | 2 | 1 | 3 | 0 |
| Case 59 | 19 | 30,546,184  | 44,342,977  | 1 | 1 | 2 | 0 |
| Case 59 | 19 | 44,348,824  | 44,409,009  | 2 | 1 | 3 | 0 |
| Case 59 | 19 | 44,413,425  | 59,097,160  | 1 | 1 | 2 | 0 |
| Case 59 | 20 | 63,244      | 26,293,985  | 1 | 1 | 2 | 0 |
| Case 59 | 20 | 29,425,357  | 60,538,278  | 1 | 1 | 2 | 0 |
| Case 59 | 20 | 60,538,561  | 62,592,736  | 2 | 1 | 3 | 0 |
| Case 59 | 20 | 62,593,580  | 62,948,788  | 1 | 1 | 2 | 0 |
| Case 59 | 21 | 10,827,533  | 10,971,337  | 1 | 1 | 2 | 0 |
| Case 59 | 21 | 14,368,320  | 48,100,155  | 1 | 1 | 2 | 0 |
| Case 59 | 22 | 16,114,244  | 51,195,728  | 1 | 1 | 2 | 0 |
| Case 59 | X  | 2,700,157   | 58,488,110  | 1 | 0 | 1 | 0 |
| Case 59 | X  | 61,694,576  | 91,029,438  | 1 | 0 | 1 | 0 |
| Case 59 | X  | 91,063,807  | 154,898,561 | 1 | 1 | 2 | 0 |
| Case 61 | 1  | 82,154      | 121,346,616 | 1 | 1 | 2 | 0 |
| Case 61 | 1  | 142,649,718 | 249,218,992 | 1 | 1 | 2 | 0 |
| Case 61 | 2  | 18,674      | 92,081,640  | 1 | 1 | 2 | 0 |

|         |    |            |             |   |   |   |   |
|---------|----|------------|-------------|---|---|---|---|
| Case 61 | 2  | 95,429,424 | 243,048,760 | 1 | 1 | 2 | 0 |
| Case 61 | 3  | 61,495     | 90,442,925  | 1 | 1 | 2 | 0 |
| Case 61 | 3  | 93,537,290 | 197,838,262 | 1 | 1 | 2 | 0 |
| Case 61 | 4  | 71,566     | 49,620,898  | 1 | 1 | 2 | 0 |
| Case 61 | 4  | 52,697,856 | 92,477,566  | 1 | 1 | 2 | 0 |
| Case 61 | 4  | 92,483,806 | 92,770,887  | 2 | 1 | 3 | 0 |
| Case 61 | 4  | 92,790,543 | 190,963,766 | 1 | 1 | 2 | 0 |
| Case 61 | 5  | 38,139     | 46,399,093  | 1 | 1 | 2 | 0 |
| Case 61 | 5  | 49,457,282 | 180,693,127 | 1 | 1 | 2 | 0 |
| Case 61 | 6  | 108,666    | 58,752,089  | 1 | 1 | 2 | 0 |
| Case 61 | 6  | 61,891,118 | 170,980,171 | 1 | 1 | 2 | 0 |
| Case 61 | 7  | 44,935     | 58,019,061  | 2 | 1 | 3 | 0 |
| Case 61 | 7  | 61,056,053 | 159,119,486 | 2 | 1 | 3 | 0 |
| Case 61 | 8  | 164,984    | 26,785,371  | 2 | 1 | 3 | 0 |
| Case 61 | 8  | 26,786,291 | 26,942,659  | 2 | 2 | 4 | 0 |
| Case 61 | 8  | 26,943,632 | 39,192,481  | 2 | 1 | 3 | 0 |
| Case 61 | 8  | 39,194,984 | 39,834,819  | 2 | 2 | 4 | 0 |
| Case 61 | 8  | 39,835,582 | 43,791,691  | 2 | 1 | 3 | 0 |
| Case 61 | 8  | 46,886,735 | 146,293,414 | 2 | 1 | 3 | 0 |
| Case 61 | 9  | 46,587     | 46,944,322  | 1 | 1 | 2 | 0 |
| Case 61 | 9  | 65,629,772 | 141,066,491 | 1 | 1 | 2 | 0 |
| Case 61 | 10 | 98,087     | 39,097,912  | 1 | 1 | 2 | 0 |
| Case 61 | 10 | 42,436,301 | 135,477,883 | 1 | 1 | 2 | 0 |
| Case 61 | 11 | 193,146    | 1,515,271   | 1 | 1 | 2 | 0 |
| Case 61 | 11 | 1,516,110  | 1,576,079   | 2 | 1 | 3 | 0 |
| Case 61 | 11 | 1,581,028  | 26,986,106  | 1 | 1 | 2 | 0 |
| Case 61 | 11 | 27,007,293 | 27,051,962  | 2 | 1 | 3 | 0 |
| Case 61 | 11 | 27,052,661 | 27,076,977  | 3 | 1 | 4 | 0 |
| Case 61 | 11 | 27,078,246 | 27,235,715  | 2 | 1 | 3 | 0 |
| Case 61 | 11 | 27,236,316 | 51,591,253  | 1 | 1 | 2 | 0 |
| Case 61 | 11 | 54,794,237 | 57,480,232  | 1 | 1 | 2 | 0 |
| Case 61 | 11 | 57,488,160 | 58,846,985  | 1 | 0 | 1 | 0 |
| Case 61 | 11 | 58,863,775 | 134,934,063 | 1 | 1 | 2 | 0 |
| Case 61 | 12 | 191,619    | 34,853,011  | 1 | 1 | 2 | 0 |
| Case 61 | 12 | 37,876,400 | 61,550,020  | 1 | 1 | 2 | 0 |
| Case 61 | 12 | 61,553,779 | 61,604,963  | 2 | 1 | 3 | 0 |
| Case 61 | 12 | 61,606,297 | 133,810,935 | 1 | 1 | 2 | 0 |
| Case 61 | 13 | 19,058,717 | 115,103,529 | 2 | 1 | 3 | 0 |
| Case 61 | 14 | 19,280,733 | 22,591,988  | 1 | 1 | 2 | 0 |
| Case 61 | 14 | 22,592,994 | 22,964,782  | 2 | 1 | 3 | 0 |
| Case 61 | 14 | 22,966,662 | 107,287,663 | 1 | 1 | 2 | 0 |
| Case 61 | 15 | 20,034,919 | 102,461,162 | 1 | 1 | 2 | 0 |
| Case 61 | 16 | 88,165     | 35,285,582  | 1 | 1 | 2 | 0 |
| Case 61 | 16 | 46,450,037 | 90,274,695  | 1 | 1 | 2 | 0 |
| Case 61 | 17 | 11,885     | 22,242,355  | 1 | 1 | 2 | 0 |
| Case 61 | 17 | 25,268,142 | 81,060,040  | 1 | 1 | 2 | 0 |
| Case 61 | 18 | 87,505     | 15,375,878  | 1 | 1 | 2 | 0 |
| Case 61 | 18 | 18,520,354 | 78,015,180  | 1 | 1 | 2 | 0 |
| Case 61 | 19 | 260,912    | 24,629,285  | 1 | 1 | 2 | 0 |
| Case 61 | 19 | 27,732,159 | 56,307,847  | 1 | 1 | 2 | 0 |
| Case 61 | 19 | 56,309,199 | 56,459,703  | 2 | 1 | 3 | 0 |
| Case 61 | 19 | 56,462,032 | 59,097,160  | 1 | 1 | 2 | 0 |
| Case 61 | 20 | 63,244     | 26,293,985  | 1 | 1 | 2 | 0 |
| Case 61 | 20 | 29,425,357 | 62,948,788  | 1 | 1 | 2 | 0 |
| Case 61 | 21 | 10,827,533 | 10,971,337  | 1 | 0 | 1 | 0 |
| Case 61 | 21 | 14,368,320 | 20,102,501  | 1 | 0 | 1 | 0 |
| Case 61 | 21 | 20,114,234 | 21,444,306  | 1 | 1 | 2 | 0 |
| Case 61 | 21 | 21,472,584 | 22,197,073  | 1 | 0 | 1 | 0 |
| Case 61 | 21 | 22,200,200 | 23,503,262  | 1 | 1 | 2 | 0 |
| Case 61 | 21 | 23,505,563 | 28,023,370  | 1 | 0 | 1 | 0 |
| Case 61 | 21 | 28,025,911 | 30,277,102  | 1 | 1 | 2 | 0 |



|         |    |             |             |   |   |   |   |
|---------|----|-------------|-------------|---|---|---|---|
| Case 61 | 21 | 30,290,699  | 32,537,602  | 1 | 0 | 1 | 0 |
| Case 61 | 21 | 32,546,603  | 35,994,711  | 1 | 1 | 2 | 0 |
| Case 61 | 21 | 36,004,539  | 45,414,119  | 1 | 0 | 1 | 0 |
| Case 61 | 21 | 45,421,406  | 48,100,155  | 1 | 1 | 2 | 0 |
| Case 61 | 22 | 16,114,244  | 29,286,180  | 1 | 1 | 2 | 0 |
| Case 61 | 22 | 29,290,981  | 51,195,728  | 2 | 1 | 3 | 0 |
| Case 61 | X  | 2,700,157   | 58,488,110  | 1 | 0 | 1 | 0 |
| Case 61 | X  | 61,694,576  | 154,898,561 | 1 | 0 | 1 | 0 |
| Case 62 | 1  | 82,154      | 18,021,758  | 1 | 1 | 2 | 0 |
| Case 62 | 1  | 18,023,365  | 18,545,932  | 1 | 0 | 1 | 0 |
| Case 62 | 1  | 18,546,610  | 81,345,264  | 1 | 1 | 2 | 0 |
| Case 62 | 1  | 81,352,249  | 94,929,485  | 1 | 0 | 1 | 0 |
| Case 62 | 1  | 94,930,345  | 95,230,514  | 2 | 0 | 2 | 1 |
| Case 62 | 1  | 95,232,272  | 95,828,652  | 1 | 0 | 1 | 0 |
| Case 62 | 1  | 95,829,831  | 121,346,616 | 1 | 1 | 2 | 0 |
| Case 62 | 1  | 142,649,718 | 151,773,160 | 1 | 1 | 2 | 0 |
| Case 62 | 1  | 151,773,167 | 152,160,437 | 2 | 1 | 3 | 0 |
| Case 62 | 1  | 152,161,735 | 249,218,992 | 1 | 1 | 2 | 0 |
| Case 62 | 2  | 18,674      | 92,081,640  | 1 | 1 | 2 | 0 |
| Case 62 | 2  | 95,429,424  | 243,048,760 | 1 | 1 | 2 | 0 |
| Case 62 | 3  | 61,495      | 27,390,490  | 1 | 1 | 2 | 0 |
| Case 62 | 3  | 27,393,976  | 27,707,901  | 1 | 0 | 1 | 0 |
| Case 62 | 3  | 27,709,178  | 90,442,925  | 1 | 1 | 2 | 0 |
| Case 62 | 3  | 93,537,290  | 197,838,262 | 1 | 1 | 2 | 0 |
| Case 62 | 4  | 71,566      | 561,631     | 2 | 1 | 3 | 0 |
| Case 62 | 4  | 575,087     | 4,137,172   | 1 | 1 | 2 | 0 |
| Case 62 | 4  | 4,167,133   | 9,456,977   | 2 | 1 | 3 | 0 |
| Case 62 | 4  | 9,470,222   | 41,061,049  | 1 | 1 | 2 | 0 |
| Case 62 | 4  | 41,063,203  | 41,376,347  | 2 | 1 | 3 | 0 |
| Case 62 | 4  | 41,377,619  | 49,620,898  | 1 | 1 | 2 | 0 |
| Case 62 | 4  | 52,697,856  | 72,237,431  | 1 | 1 | 2 | 0 |
| Case 62 | 4  | 72,239,375  | 72,618,334  | 1 | 0 | 1 | 0 |
| Case 62 | 4  | 72,620,162  | 91,862,940  | 1 | 1 | 2 | 0 |
| Case 62 | 4  | 91,866,171  | 91,902,620  | 1 | 0 | 1 | 0 |
| Case 62 | 4  | 91,910,883  | 186,843,924 | 1 | 1 | 2 | 0 |
| Case 62 | 4  | 186,846,999 | 186,960,627 | 2 | 1 | 3 | 0 |
| Case 62 | 4  | 186,961,015 | 190,963,766 | 1 | 1 | 2 | 0 |
| Case 62 | 5  | 38,139      | 1,041,105   | 1 | 1 | 2 | 0 |
| Case 62 | 5  | 1,051,687   | 1,266,310   | 2 | 1 | 3 | 0 |
| Case 62 | 5  | 1,268,644   | 46,399,093  | 1 | 1 | 2 | 0 |
| Case 62 | 5  | 49,457,282  | 58,882,102  | 1 | 1 | 2 | 0 |
| Case 62 | 5  | 58,886,873  | 59,735,865  | 1 | 0 | 1 | 0 |
| Case 62 | 5  | 59,736,177  | 178,730,062 | 1 | 1 | 2 | 0 |
| Case 62 | 5  | 178,731,921 | 178,935,665 | 2 | 1 | 3 | 0 |
| Case 62 | 5  | 178,936,722 | 180,693,127 | 1 | 1 | 2 | 0 |
| Case 62 | 6  | 108,666     | 41,796,970  | 1 | 1 | 2 | 0 |
| Case 62 | 6  | 41,814,760  | 42,232,509  | 2 | 1 | 3 | 0 |
| Case 62 | 6  | 42,233,518  | 58,752,089  | 1 | 1 | 2 | 0 |
| Case 62 | 6  | 61,891,118  | 135,440,127 | 1 | 1 | 2 | 0 |
| Case 62 | 6  | 135,447,773 | 135,659,703 | 2 | 1 | 3 | 0 |
| Case 62 | 6  | 135,669,031 | 170,980,171 | 1 | 1 | 2 | 0 |
| Case 62 | 7  | 44,935      | 83,185      | 2 | 1 | 3 | 0 |
| Case 62 | 7  | 93,811      | 2,304,078   | 1 | 1 | 2 | 0 |
| Case 62 | 7  | 2,309,271   | 2,724,098   | 2 | 1 | 3 | 0 |
| Case 62 | 7  | 2,727,337   | 12,982,479  | 1 | 1 | 2 | 0 |
| Case 62 | 7  | 12,990,038  | 13,497,326  | 1 | 0 | 1 | 0 |
| Case 62 | 7  | 13,498,299  | 38,319,339  | 1 | 1 | 2 | 0 |
| Case 62 | 7  | 38,319,378  | 38,356,545  | 2 | 1 | 3 | 0 |
| Case 62 | 7  | 38,357,075  | 58,019,061  | 1 | 1 | 2 | 0 |
| Case 62 | 7  | 61,056,053  | 61,852,895  | 1 | 1 | 2 | 0 |
| Case 62 | 7  | 61,994,170  | 94,021,475  | 1 | 0 | 1 | 0 |

|         |    |             |             |   |   |   |   |
|---------|----|-------------|-------------|---|---|---|---|
| Case 62 | 7  | 94,021,546  | 134,896,167 | 1 | 1 | 2 | 0 |
| Case 62 | 7  | 134,913,049 | 135,123,060 | 1 | 0 | 1 | 0 |
| Case 62 | 7  | 135,165,275 | 149,548,591 | 1 | 1 | 2 | 0 |
| Case 62 | 7  | 149,551,993 | 149,806,076 | 2 | 1 | 3 | 0 |
| Case 62 | 7  | 149,828,048 | 153,478,281 | 1 | 1 | 2 | 0 |
| Case 62 | 7  | 153,485,627 | 153,654,045 | 2 | 1 | 3 | 0 |
| Case 62 | 7  | 153,670,448 | 159,119,486 | 1 | 1 | 2 | 0 |
| Case 62 | 8  | 164,984     | 15,389,837  | 2 | 1 | 3 | 0 |
| Case 62 | 8  | 15,395,144  | 26,159,509  | 1 | 1 | 2 | 0 |
| Case 62 | 8  | 26,160,015  | 28,541,640  | 2 | 1 | 3 | 0 |
| Case 62 | 8  | 28,557,627  | 37,469,921  | 1 | 1 | 2 | 0 |
| Case 62 | 8  | 37,470,110  | 37,884,310  | 2 | 1 | 3 | 0 |
| Case 62 | 8  | 37,887,422  | 43,791,691  | 1 | 1 | 2 | 0 |
| Case 62 | 8  | 46,886,735  | 50,392,001  | 1 | 1 | 2 | 0 |
| Case 62 | 8  | 50,396,852  | 50,539,763  | 3 | 2 | 5 | 0 |
| Case 62 | 8  | 50,545,758  | 63,358,921  | 1 | 1 | 2 | 0 |
| Case 62 | 8  | 63,359,627  | 63,402,743  | 0 | 0 | 0 | 0 |
| Case 62 | 8  | 63,403,161  | 65,213,478  | 1 | 1 | 2 | 0 |
| Case 62 | 8  | 65,227,070  | 90,366,827  | 2 | 1 | 3 | 0 |
| Case 62 | 8  | 90,369,994  | 90,546,979  | 1 | 0 | 1 | 0 |
| Case 62 | 8  | 90,559,526  | 91,127,680  | 2 | 1 | 3 | 0 |
| Case 62 | 8  | 91,130,683  | 91,301,523  | 3 | 1 | 4 | 0 |
| Case 62 | 8  | 91,302,177  | 109,092,541 | 2 | 1 | 3 | 0 |
| Case 62 | 8  | 109,094,747 | 109,288,399 | 1 | 1 | 2 | 0 |
| Case 62 | 8  | 109,288,442 | 128,471,041 | 2 | 1 | 3 | 0 |
| Case 62 | 8  | 128,472,320 | 128,718,443 | 3 | 1 | 4 | 0 |
| Case 62 | 8  | 128,725,947 | 141,847,249 | 2 | 1 | 3 | 0 |
| Case 62 | 8  | 141,857,322 | 142,189,589 | 2 | 0 | 2 | 1 |
| Case 62 | 8  | 142,190,927 | 146,293,414 | 2 | 1 | 3 | 0 |
| Case 62 | 9  | 46,587      | 46,944,322  | 1 | 1 | 2 | 0 |
| Case 62 | 9  | 65,629,772  | 141,066,491 | 1 | 1 | 2 | 0 |
| Case 62 | 10 | 98,087      | 19,921,103  | 1 | 1 | 2 | 0 |
| Case 62 | 10 | 19,929,513  | 22,607,901  | 1 | 0 | 1 | 0 |
| Case 62 | 10 | 22,611,360  | 39,097,912  | 1 | 1 | 2 | 0 |
| Case 62 | 10 | 42,436,301  | 135,477,883 | 1 | 1 | 2 | 0 |
| Case 62 | 11 | 193,146     | 10,603,648  | 1 | 1 | 2 | 0 |
| Case 62 | 11 | 10,608,389  | 11,440,262  | 2 | 1 | 3 | 0 |
| Case 62 | 11 | 11,441,318  | 40,580,159  | 1 | 1 | 2 | 0 |
| Case 62 | 11 | 40,586,402  | 40,744,768  | 1 | 0 | 1 | 0 |
| Case 62 | 11 | 40,756,460  | 51,591,253  | 1 | 1 | 2 | 0 |
| Case 62 | 11 | 54,794,237  | 134,934,063 | 1 | 1 | 2 | 0 |
| Case 62 | 12 | 191,619     | 34,853,011  | 1 | 1 | 2 | 0 |
| Case 62 | 12 | 37,876,400  | 133,810,935 | 1 | 1 | 2 | 0 |
| Case 62 | 13 | 19,058,717  | 51,305,128  | 2 | 0 | 2 | 1 |
| Case 62 | 13 | 51,306,330  | 54,556,329  | 3 | 0 | 3 | 1 |
| Case 62 | 13 | 54,557,128  | 71,204,021  | 2 | 0 | 2 | 1 |
| Case 62 | 13 | 71,209,158  | 74,372,931  | 4 | 0 | 4 | 1 |
| Case 62 | 13 | 74,373,785  | 115,103,529 | 2 | 0 | 2 | 1 |
| Case 62 | 14 | 19,280,733  | 22,435,602  | 1 | 1 | 2 | 0 |
| Case 62 | 14 | 22,453,915  | 22,970,327  | 2 | 1 | 3 | 0 |
| Case 62 | 14 | 22,972,815  | 67,787,071  | 1 | 1 | 2 | 0 |
| Case 62 | 14 | 67,787,968  | 68,252,707  | 2 | 1 | 3 | 0 |
| Case 62 | 14 | 68,252,852  | 107,287,663 | 1 | 1 | 2 | 0 |
| Case 62 | 15 | 20,034,919  | 49,081,537  | 1 | 1 | 2 | 0 |
| Case 62 | 15 | 49,083,481  | 68,471,891  | 1 | 0 | 1 | 0 |
| Case 62 | 15 | 68,480,887  | 71,058,520  | 1 | 1 | 2 | 0 |
| Case 62 | 15 | 71,068,158  | 71,143,992  | 2 | 1 | 3 | 0 |
| Case 62 | 15 | 71,144,048  | 102,461,162 | 1 | 1 | 2 | 0 |
| Case 62 | 16 | 88,165      | 31,664,747  | 2 | 0 | 2 | 1 |
| Case 62 | 16 | 31,676,116  | 35,285,582  | 1 | 0 | 1 | 0 |
| Case 62 | 16 | 46,450,037  | 58,945,684  | 2 | 0 | 2 | 1 |

|         |    |            |             |   |   |   |   |
|---------|----|------------|-------------|---|---|---|---|
| Case 62 | 16 | 58,956,480 | 64,636,137  | 1 | 0 | 1 | 0 |
| Case 62 | 16 | 64,642,635 | 75,603,925  | 2 | 0 | 2 | 1 |
| Case 62 | 16 | 75,613,074 | 76,899,703  | 1 | 0 | 1 | 0 |
| Case 62 | 16 | 76,900,428 | 90,274,695  | 2 | 0 | 2 | 1 |
| Case 62 | 17 | 11,885     | 1,281,864   | 1 | 0 | 1 | 0 |
| Case 62 | 17 | 1,282,979  | 2,072,949   | 2 | 0 | 2 | 1 |
| Case 62 | 17 | 2,084,712  | 9,808,215   | 1 | 0 | 1 | 0 |
| Case 62 | 17 | 9,808,253  | 10,010,287  | 2 | 0 | 2 | 1 |
| Case 62 | 17 | 10,011,062 | 20,878,744  | 1 | 0 | 1 | 0 |
| Case 62 | 17 | 20,893,572 | 20,914,156  | 2 | 0 | 2 | 1 |
| Case 62 | 17 | 20,916,590 | 22,242,355  | 1 | 0 | 1 | 0 |
| Case 62 | 17 | 25,268,142 | 34,443,811  | 1 | 1 | 2 | 0 |
| Case 62 | 17 | 34,445,325 | 34,468,886  | 2 | 1 | 3 | 0 |
| Case 62 | 17 | 34,476,396 | 41,645,244  | 1 | 1 | 2 | 0 |
| Case 62 | 17 | 41,652,878 | 41,764,995  | 2 | 1 | 3 | 0 |
| Case 62 | 17 | 41,767,975 | 79,979,504  | 1 | 1 | 2 | 0 |
| Case 62 | 17 | 79,979,642 | 80,428,099  | 2 | 1 | 3 | 0 |
| Case 62 | 17 | 80,430,542 | 81,060,040  | 1 | 1 | 2 | 0 |
| Case 62 | 18 | 87,505     | 15,375,878  | 1 | 1 | 2 | 0 |
| Case 62 | 18 | 18,520,354 | 20,581,551  | 1 | 1 | 2 | 0 |
| Case 62 | 18 | 20,602,153 | 20,820,728  | 2 | 1 | 3 | 0 |
| Case 62 | 18 | 20,824,373 | 78,015,180  | 1 | 1 | 2 | 0 |
| Case 62 | 19 | 260,912    | 5,925,689   | 1 | 0 | 1 | 0 |
| Case 62 | 19 | 5,925,703  | 9,741,216   | 1 | 1 | 2 | 0 |
| Case 62 | 19 | 9,764,192  | 10,206,662  | 1 | 0 | 1 | 0 |
| Case 62 | 19 | 10,213,154 | 12,733,864  | 1 | 1 | 2 | 0 |
| Case 62 | 19 | 12,738,543 | 13,080,720  | 1 | 0 | 1 | 0 |
| Case 62 | 19 | 13,080,737 | 17,180,812  | 2 | 1 | 3 | 0 |
| Case 62 | 19 | 17,182,939 | 24,629,285  | 1 | 0 | 1 | 0 |
| Case 62 | 19 | 27,732,159 | 27,801,814  | 1 | 0 | 1 | 0 |
| Case 62 | 19 | 27,828,664 | 28,127,201  | 2 | 1 | 3 | 0 |
| Case 62 | 19 | 28,144,500 | 46,216,642  | 1 | 1 | 2 | 0 |
| Case 62 | 19 | 46,221,726 | 46,357,729  | 2 | 1 | 3 | 0 |
| Case 62 | 19 | 46,361,607 | 59,097,160  | 1 | 1 | 2 | 0 |
| Case 62 | 20 | 63,244     | 2,033,308   | 2 | 1 | 3 | 0 |
| Case 62 | 20 | 2,033,627  | 2,201,257   | 2 | 0 | 2 | 1 |
| Case 62 | 20 | 2,204,811  | 15,237,052  | 2 | 1 | 3 | 0 |
| Case 62 | 20 | 15,241,763 | 15,292,533  | 2 | 0 | 2 | 1 |
| Case 62 | 20 | 15,295,797 | 15,325,461  | 2 | 1 | 3 | 0 |
| Case 62 | 20 | 15,335,574 | 15,368,919  | 3 | 2 | 5 | 0 |
| Case 62 | 20 | 15,375,124 | 15,424,659  | 3 | 1 | 4 | 0 |
| Case 62 | 20 | 15,428,111 | 15,514,898  | 2 | 1 | 3 | 0 |
| Case 62 | 20 | 15,520,791 | 15,914,464  | 1 | 1 | 2 | 0 |
| Case 62 | 20 | 15,916,192 | 26,293,985  | 2 | 1 | 3 | 0 |
| Case 62 | 20 | 29,425,357 | 34,290,281  | 2 | 1 | 3 | 0 |
| Case 62 | 20 | 34,294,409 | 34,482,534  | 3 | 1 | 4 | 0 |
| Case 62 | 20 | 34,487,348 | 62,948,788  | 2 | 1 | 3 | 0 |
| Case 62 | 21 | 10,827,533 | 10,971,337  | 1 | 0 | 1 | 0 |
| Case 62 | 21 | 14,368,320 | 29,486,008  | 1 | 0 | 1 | 0 |
| Case 62 | 21 | 29,495,146 | 30,095,754  | 0 | 0 | 0 | 0 |
| Case 62 | 21 | 30,097,426 | 31,720,911  | 1 | 0 | 1 | 0 |
| Case 62 | 21 | 31,730,168 | 32,999,554  | 1 | 1 | 2 | 0 |
| Case 62 | 21 | 33,018,369 | 33,372,446  | 2 | 1 | 3 | 0 |
| Case 62 | 21 | 33,372,749 | 34,022,588  | 3 | 1 | 4 | 0 |
| Case 62 | 21 | 34,024,444 | 35,857,700  | 2 | 1 | 3 | 0 |
| Case 62 | 21 | 35,858,097 | 36,057,929  | 3 | 1 | 4 | 0 |
| Case 62 | 21 | 36,059,609 | 48,100,155  | 1 | 0 | 1 | 0 |
| Case 62 | 22 | 16,114,244 | 51,195,728  | 1 | 0 | 1 | 0 |
| Case 62 | X  | 2,700,157  | 58,488,110  | 1 | 0 | 1 | 0 |
| Case 62 | X  | 61,694,576 | 154,898,561 | 1 | 0 | 1 | 0 |
| Case 63 | 1  | 82,154     | 7,237,086   | 2 | 1 | 3 | 0 |

|         |   |             |             |   |   |   |   |
|---------|---|-------------|-------------|---|---|---|---|
| Case 63 | 1 | 7,240,456   | 8,395,560   | 3 | 1 | 4 | 0 |
| Case 63 | 1 | 8,397,803   | 10,924,710  | 2 | 1 | 3 | 0 |
| Case 63 | 1 | 10,929,928  | 12,291,334  | 3 | 1 | 4 | 0 |
| Case 63 | 1 | 12,294,420  | 20,149,058  | 2 | 1 | 3 | 0 |
| Case 63 | 1 | 20,150,998  | 20,295,022  | 3 | 1 | 4 | 0 |
| Case 63 | 1 | 20,296,319  | 25,889,422  | 2 | 1 | 3 | 0 |
| Case 63 | 1 | 25,889,632  | 26,403,098  | 3 | 1 | 4 | 0 |
| Case 63 | 1 | 26,411,918  | 40,281,441  | 2 | 1 | 3 | 0 |
| Case 63 | 1 | 40,286,005  | 40,646,447  | 2 | 2 | 4 | 0 |
| Case 63 | 1 | 40,661,311  | 45,903,488  | 2 | 1 | 3 | 0 |
| Case 63 | 1 | 45,909,994  | 46,501,386  | 2 | 2 | 4 | 0 |
| Case 63 | 1 | 46,501,599  | 47,449,065  | 3 | 1 | 4 | 0 |
| Case 63 | 1 | 47,449,486  | 85,634,847  | 2 | 1 | 3 | 0 |
| Case 63 | 1 | 85,637,648  | 85,947,200  | 2 | 2 | 4 | 0 |
| Case 63 | 1 | 85,951,597  | 87,877,540  | 2 | 1 | 3 | 0 |
| Case 63 | 1 | 87,877,672  | 88,494,859  | 3 | 1 | 4 | 0 |
| Case 63 | 1 | 88,504,370  | 94,514,475  | 2 | 1 | 3 | 0 |
| Case 63 | 1 | 94,514,477  | 95,116,807  | 3 | 1 | 4 | 0 |
| Case 63 | 1 | 95,117,157  | 113,040,277 | 2 | 1 | 3 | 0 |
| Case 63 | 1 | 113,040,421 | 113,597,564 | 3 | 1 | 4 | 0 |
| Case 63 | 1 | 113,601,445 | 121,346,616 | 2 | 1 | 3 | 0 |
| Case 63 | 1 | 142,649,718 | 152,028,561 | 3 | 2 | 5 | 0 |
| Case 63 | 1 | 152,037,515 | 152,275,523 | 3 | 1 | 4 | 0 |
| Case 63 | 1 | 152,275,540 | 153,354,406 | 2 | 2 | 4 | 0 |
| Case 63 | 1 | 153,356,513 | 153,998,032 | 3 | 2 | 5 | 0 |
| Case 63 | 1 | 153,998,128 | 180,335,264 | 2 | 2 | 4 | 0 |
| Case 63 | 1 | 180,340,706 | 181,358,407 | 3 | 2 | 5 | 0 |
| Case 63 | 1 | 181,359,880 | 184,878,307 | 2 | 2 | 4 | 0 |
| Case 63 | 1 | 184,888,653 | 185,827,128 | 3 | 2 | 5 | 0 |
| Case 63 | 1 | 185,827,238 | 200,974,729 | 2 | 2 | 4 | 0 |
| Case 63 | 1 | 200,974,888 | 203,064,086 | 3 | 1 | 4 | 0 |
| Case 63 | 1 | 203,080,264 | 249,218,992 | 2 | 1 | 3 | 0 |
| Case 63 | 2 | 18,674      | 573,207     | 2 | 1 | 3 | 0 |
| Case 63 | 2 | 578,204     | 674,963     | 3 | 1 | 4 | 0 |
| Case 63 | 2 | 675,618     | 21,759,069  | 2 | 1 | 3 | 0 |
| Case 63 | 2 | 21,765,149  | 21,967,993  | 3 | 1 | 4 | 0 |
| Case 63 | 2 | 22,005,145  | 26,678,977  | 2 | 1 | 3 | 0 |
| Case 63 | 2 | 26,679,362  | 27,418,974  | 3 | 1 | 4 | 0 |
| Case 63 | 2 | 27,419,282  | 28,205,581  | 2 | 1 | 3 | 0 |
| Case 63 | 2 | 28,224,116  | 29,325,271  | 4 | 1 | 5 | 0 |
| Case 63 | 2 | 29,335,758  | 29,446,701  | 2 | 1 | 3 | 0 |
| Case 63 | 2 | 29,447,108  | 29,624,193  | 3 | 1 | 4 | 0 |
| Case 63 | 2 | 29,624,787  | 38,282,332  | 2 | 1 | 3 | 0 |
| Case 63 | 2 | 38,290,916  | 38,687,498  | 2 | 2 | 4 | 0 |
| Case 63 | 2 | 38,692,619  | 42,708,267  | 2 | 1 | 3 | 0 |
| Case 63 | 2 | 42,712,932  | 43,671,904  | 2 | 2 | 4 | 0 |
| Case 63 | 2 | 43,675,898  | 44,304,047  | 2 | 1 | 3 | 0 |
| Case 63 | 2 | 44,305,240  | 44,414,354  | 1 | 0 | 1 | 0 |
| Case 63 | 2 | 44,428,390  | 50,176,965  | 2 | 1 | 3 | 0 |
| Case 63 | 2 | 50,179,975  | 50,318,462  | 3 | 1 | 4 | 0 |
| Case 63 | 2 | 50,318,584  | 85,147,568  | 2 | 1 | 3 | 0 |
| Case 63 | 2 | 85,163,536  | 85,191,146  | 3 | 2 | 5 | 0 |
| Case 63 | 2 | 85,191,263  | 92,081,640  | 2 | 1 | 3 | 0 |
| Case 63 | 2 | 95,429,424  | 105,833,093 | 2 | 1 | 3 | 0 |
| Case 63 | 2 | 105,835,945 | 106,588,730 | 4 | 1 | 5 | 0 |
| Case 63 | 2 | 106,592,564 | 122,288,029 | 2 | 1 | 3 | 0 |
| Case 63 | 2 | 122,316,046 | 122,971,252 | 3 | 1 | 4 | 0 |
| Case 63 | 2 | 122,973,151 | 160,175,310 | 2 | 1 | 3 | 0 |
| Case 63 | 2 | 160,181,398 | 170,356,065 | 3 | 1 | 4 | 0 |
| Case 63 | 2 | 170,359,113 | 170,549,452 | 3 | 2 | 5 | 0 |
| Case 63 | 2 | 170,550,727 | 173,097,848 | 3 | 1 | 4 | 0 |

|         |   |             |             |   |   |   |   |
|---------|---|-------------|-------------|---|---|---|---|
| Case 63 | 2 | 173,104,712 | 173,589,876 | 4 | 1 | 5 | 0 |
| Case 63 | 2 | 173,592,268 | 195,651,706 | 3 | 1 | 4 | 0 |
| Case 63 | 2 | 195,663,691 | 195,993,600 | 1 | 0 | 1 | 0 |
| Case 63 | 2 | 196,002,614 | 208,424,972 | 3 | 1 | 4 | 0 |
| Case 63 | 2 | 208,426,257 | 208,641,908 | 3 | 2 | 5 | 0 |
| Case 63 | 2 | 208,643,043 | 214,034,666 | 3 | 1 | 4 | 0 |
| Case 63 | 2 | 214,036,796 | 214,214,297 | 2 | 1 | 3 | 0 |
| Case 63 | 2 | 214,217,706 | 234,235,804 | 3 | 1 | 4 | 0 |
| Case 63 | 2 | 234,235,819 | 234,573,896 | 5 | 1 | 6 | 0 |
| Case 63 | 2 | 234,578,693 | 243,048,760 | 3 | 1 | 4 | 0 |
| Case 63 | 3 | 61,495      | 4,486,303   | 1 | 1 | 2 | 0 |
| Case 63 | 3 | 4,489,562   | 4,716,811   | 1 | 0 | 1 | 0 |
| Case 63 | 3 | 4,716,885   | 14,042,534  | 2 | 1 | 3 | 0 |
| Case 63 | 3 | 14,048,394  | 23,635,228  | 1 | 1 | 2 | 0 |
| Case 63 | 3 | 23,635,636  | 24,241,978  | 2 | 1 | 3 | 0 |
| Case 63 | 3 | 24,251,816  | 32,702,348  | 1 | 1 | 2 | 0 |
| Case 63 | 3 | 32,704,457  | 33,165,933  | 2 | 1 | 3 | 0 |
| Case 63 | 3 | 33,166,011  | 42,226,151  | 1 | 1 | 2 | 0 |
| Case 63 | 3 | 42,229,550  | 43,070,847  | 2 | 1 | 3 | 0 |
| Case 63 | 3 | 43,073,453  | 51,943,333  | 1 | 1 | 2 | 0 |
| Case 63 | 3 | 51,962,081  | 52,557,693  | 2 | 1 | 3 | 0 |
| Case 63 | 3 | 52,557,705  | 60,461,994  | 1 | 1 | 2 | 0 |
| Case 63 | 3 | 60,464,275  | 60,557,852  | 1 | 0 | 1 | 0 |
| Case 63 | 3 | 60,559,047  | 60,771,108  | 1 | 1 | 2 | 0 |
| Case 63 | 3 | 60,771,914  | 61,453,255  | 1 | 0 | 1 | 0 |
| Case 63 | 3 | 61,454,724  | 89,051,472  | 1 | 1 | 2 | 0 |
| Case 63 | 3 | 89,051,475  | 90,442,925  | 2 | 1 | 3 | 0 |
| Case 63 | 3 | 93,537,290  | 94,006,495  | 2 | 1 | 3 | 0 |
| Case 63 | 3 | 94,014,910  | 155,775,874 | 3 | 1 | 4 | 0 |
| Case 63 | 3 | 155,811,323 | 155,907,740 | 4 | 1 | 5 | 0 |
| Case 63 | 3 | 155,929,451 | 182,602,594 | 3 | 1 | 4 | 0 |
| Case 63 | 3 | 182,607,215 | 184,155,408 | 3 | 2 | 5 | 0 |
| Case 63 | 3 | 184,157,645 | 187,394,508 | 3 | 1 | 4 | 0 |
| Case 63 | 3 | 187,395,688 | 187,800,184 | 3 | 2 | 5 | 0 |
| Case 63 | 3 | 187,802,669 | 194,634,168 | 3 | 1 | 4 | 0 |
| Case 63 | 3 | 194,641,346 | 194,900,478 | 5 | 1 | 6 | 0 |
| Case 63 | 3 | 194,906,614 | 195,518,206 | 3 | 1 | 4 | 0 |
| Case 63 | 3 | 195,518,330 | 196,022,902 | 3 | 2 | 5 | 0 |
| Case 63 | 3 | 196,022,930 | 197,838,262 | 3 | 1 | 4 | 0 |
| Case 63 | 4 | 71,566      | 37,513,594  | 1 | 1 | 2 | 0 |
| Case 63 | 4 | 37,516,608  | 37,849,004  | 2 | 1 | 3 | 0 |
| Case 63 | 4 | 37,850,188  | 49,620,898  | 1 | 1 | 2 | 0 |
| Case 63 | 4 | 52,697,856  | 71,265,172  | 1 | 1 | 2 | 0 |
| Case 63 | 4 | 71,265,840  | 71,748,245  | 2 | 1 | 3 | 0 |
| Case 63 | 4 | 71,761,726  | 79,052,851  | 1 | 1 | 2 | 0 |
| Case 63 | 4 | 79,056,713  | 79,747,281  | 2 | 1 | 3 | 0 |
| Case 63 | 4 | 79,763,578  | 87,287,934  | 1 | 1 | 2 | 0 |
| Case 63 | 4 | 87,296,065  | 91,123,874  | 2 | 1 | 3 | 0 |
| Case 63 | 4 | 91,154,964  | 91,319,038  | 1 | 1 | 2 | 0 |
| Case 63 | 4 | 91,336,936  | 100,171,379 | 2 | 1 | 3 | 0 |
| Case 63 | 4 | 100,178,151 | 100,243,932 | 1 | 1 | 2 | 0 |
| Case 63 | 4 | 100,244,221 | 105,835,961 | 2 | 1 | 3 | 0 |
| Case 63 | 4 | 105,838,702 | 106,141,736 | 3 | 1 | 4 | 0 |
| Case 63 | 4 | 106,144,735 | 118,622,573 | 2 | 1 | 3 | 0 |
| Case 63 | 4 | 118,627,589 | 118,651,823 | 1 | 1 | 2 | 0 |
| Case 63 | 4 | 118,653,376 | 175,817,225 | 2 | 1 | 3 | 0 |
| Case 63 | 4 | 175,828,036 | 175,876,473 | 3 | 1 | 4 | 0 |
| Case 63 | 4 | 175,878,038 | 179,334,721 | 2 | 1 | 3 | 0 |
| Case 63 | 4 | 179,335,261 | 179,424,481 | 2 | 2 | 4 | 0 |
| Case 63 | 4 | 179,426,861 | 190,963,766 | 2 | 1 | 3 | 0 |
| Case 63 | 5 | 38,139      | 38,496,637  | 5 | 1 | 6 | 0 |

|         |   |             |             |   |   |   |   |
|---------|---|-------------|-------------|---|---|---|---|
| Case 63 | 5 | 38,506,031  | 38,912,195  | 7 | 1 | 8 | 0 |
| Case 63 | 5 | 38,917,574  | 46,399,093  | 6 | 1 | 7 | 0 |
| Case 63 | 5 | 49,457,282  | 110,404,999 | 2 | 0 | 2 | 1 |
| Case 63 | 5 | 110,405,675 | 115,642,513 | 2 | 1 | 3 | 0 |
| Case 63 | 5 | 115,643,769 | 115,727,838 | 2 | 0 | 2 | 1 |
| Case 63 | 5 | 115,731,448 | 119,771,119 | 2 | 1 | 3 | 0 |
| Case 63 | 5 | 119,771,549 | 119,940,108 | 4 | 1 | 5 | 0 |
| Case 63 | 5 | 119,950,084 | 123,534,021 | 2 | 1 | 3 | 0 |
| Case 63 | 5 | 123,545,499 | 123,802,605 | 2 | 2 | 4 | 0 |
| Case 63 | 5 | 123,811,602 | 126,953,752 | 2 | 1 | 3 | 0 |
| Case 63 | 5 | 126,958,230 | 127,196,066 | 3 | 1 | 4 | 0 |
| Case 63 | 5 | 127,203,192 | 172,179,584 | 2 | 1 | 3 | 0 |
| Case 63 | 5 | 172,188,213 | 172,248,631 | 4 | 1 | 5 | 0 |
| Case 63 | 5 | 172,250,261 | 180,693,127 | 2 | 1 | 3 | 0 |
| Case 63 | 6 | 108,666     | 13,464,827  | 2 | 1 | 3 | 0 |
| Case 63 | 6 | 13,466,830  | 14,545,779  | 2 | 2 | 4 | 0 |
| Case 63 | 6 | 14,554,627  | 22,862,571  | 2 | 1 | 3 | 0 |
| Case 63 | 6 | 22,865,377  | 23,380,034  | 4 | 2 | 6 | 0 |
| Case 63 | 6 | 23,380,783  | 28,824,958  | 2 | 1 | 3 | 0 |
| Case 63 | 6 | 28,826,262  | 29,031,142  | 3 | 1 | 4 | 0 |
| Case 63 | 6 | 29,033,053  | 29,966,850  | 4 | 1 | 5 | 0 |
| Case 63 | 6 | 29,967,529  | 30,028,352  | 5 | 1 | 6 | 0 |
| Case 63 | 6 | 30,028,424  | 36,370,254  | 4 | 1 | 5 | 0 |
| Case 63 | 6 | 36,375,304  | 37,851,191  | 3 | 1 | 4 | 0 |
| Case 63 | 6 | 37,869,548  | 50,664,995  | 4 | 1 | 5 | 0 |
| Case 63 | 6 | 50,681,803  | 52,044,509  | 3 | 1 | 4 | 0 |
| Case 63 | 6 | 52,050,353  | 52,425,189  | 3 | 2 | 5 | 0 |
| Case 63 | 6 | 52,427,739  | 55,040,696  | 3 | 1 | 4 | 0 |
| Case 63 | 6 | 55,041,811  | 55,218,841  | 4 | 1 | 5 | 0 |
| Case 63 | 6 | 55,223,750  | 57,229,283  | 3 | 1 | 4 | 0 |
| Case 63 | 6 | 57,229,990  | 58,055,927  | 2 | 1 | 3 | 0 |
| Case 63 | 6 | 58,150,777  | 58,741,497  | 3 | 1 | 4 | 0 |
| Case 63 | 6 | 58,752,089  | 58,752,089  | 1 | 1 | 2 | 0 |
| Case 63 | 6 | 61,891,118  | 108,558,280 | 1 | 1 | 2 | 0 |
| Case 63 | 6 | 108,561,974 | 132,912,612 | 2 | 1 | 3 | 0 |
| Case 63 | 6 | 132,913,582 | 133,237,051 | 3 | 1 | 4 | 0 |
| Case 63 | 6 | 133,237,557 | 134,266,699 | 2 | 1 | 3 | 0 |
| Case 63 | 6 | 134,268,822 | 147,136,244 | 2 | 2 | 4 | 0 |
| Case 63 | 6 | 147,144,142 | 147,288,120 | 2 | 1 | 3 | 0 |
| Case 63 | 6 | 147,289,349 | 161,430,468 | 2 | 2 | 4 | 0 |
| Case 63 | 6 | 161,433,981 | 161,680,844 | 2 | 1 | 3 | 0 |
| Case 63 | 6 | 161,683,974 | 162,559,180 | 2 | 2 | 4 | 0 |
| Case 63 | 6 | 162,565,718 | 162,928,898 | 2 | 1 | 3 | 0 |
| Case 63 | 6 | 162,933,253 | 170,980,171 | 2 | 2 | 4 | 0 |
| Case 63 | 7 | 44,935      | 5,427,950   | 2 | 1 | 3 | 0 |
| Case 63 | 7 | 5,432,672   | 6,334,747   | 2 | 2 | 4 | 0 |
| Case 63 | 7 | 6,339,313   | 31,471,205  | 2 | 1 | 3 | 0 |
| Case 63 | 7 | 31,472,061  | 31,528,056  | 3 | 1 | 4 | 0 |
| Case 63 | 7 | 31,528,906  | 43,728,129  | 2 | 1 | 3 | 0 |
| Case 63 | 7 | 43,738,731  | 44,211,337  | 2 | 2 | 4 | 0 |
| Case 63 | 7 | 44,216,137  | 58,019,061  | 2 | 1 | 3 | 0 |
| Case 63 | 7 | 61,056,053  | 64,498,257  | 2 | 1 | 3 | 0 |
| Case 63 | 7 | 64,537,992  | 65,350,058  | 3 | 1 | 4 | 0 |
| Case 63 | 7 | 65,360,715  | 99,238,141  | 2 | 1 | 3 | 0 |
| Case 63 | 7 | 99,238,342  | 100,061,107 | 3 | 1 | 4 | 0 |
| Case 63 | 7 | 100,061,612 | 102,999,943 | 2 | 1 | 3 | 0 |
| Case 63 | 7 | 103,003,969 | 103,278,471 | 3 | 1 | 4 | 0 |
| Case 63 | 7 | 103,278,744 | 109,736,919 | 2 | 1 | 3 | 0 |
| Case 63 | 7 | 109,738,166 | 109,939,167 | 3 | 1 | 4 | 0 |
| Case 63 | 7 | 109,939,445 | 111,650,835 | 2 | 1 | 3 | 0 |
| Case 63 | 7 | 111,651,812 | 111,839,373 | 2 | 0 | 2 | 1 |

|         |    |             |             |   |   |   |   |
|---------|----|-------------|-------------|---|---|---|---|
| Case 63 | 7  | 111,845,773 | 120,998,784 | 2 | 1 | 3 | 0 |
| Case 63 | 7  | 121,003,000 | 121,270,977 | 2 | 2 | 4 | 0 |
| Case 63 | 7  | 121,275,229 | 141,286,885 | 2 | 1 | 3 | 0 |
| Case 63 | 7  | 141,287,652 | 142,275,743 | 3 | 1 | 4 | 0 |
| Case 63 | 7  | 142,328,771 | 153,697,418 | 2 | 1 | 3 | 0 |
| Case 63 | 7  | 153,707,385 | 157,455,459 | 3 | 1 | 4 | 0 |
| Case 63 | 7  | 157,458,015 | 159,119,486 | 2 | 1 | 3 | 0 |
| Case 63 | 8  | 164,984     | 2,747,940   | 2 | 0 | 2 | 1 |
| Case 63 | 8  | 2,748,821   | 2,919,891   | 4 | 0 | 4 | 1 |
| Case 63 | 8  | 2,920,183   | 16,429,770  | 2 | 0 | 2 | 1 |
| Case 63 | 8  | 16,435,574  | 16,500,728  | 0 | 0 | 0 | 0 |
| Case 63 | 8  | 16,502,722  | 43,791,691  | 2 | 0 | 2 | 1 |
| Case 63 | 8  | 46,886,735  | 52,831,142  | 2 | 0 | 2 | 1 |
| Case 63 | 8  | 52,844,411  | 79,659,801  | 4 | 2 | 6 | 0 |
| Case 63 | 8  | 79,663,408  | 80,097,636  | 3 | 2 | 5 | 0 |
| Case 63 | 8  | 80,111,894  | 94,128,797  | 4 | 2 | 6 | 0 |
| Case 63 | 8  | 94,134,191  | 95,345,128  | 5 | 2 | 7 | 0 |
| Case 63 | 8  | 95,365,165  | 95,897,725  | 4 | 2 | 6 | 0 |
| Case 63 | 8  | 95,909,498  | 95,965,135  | 3 | 2 | 5 | 0 |
| Case 63 | 8  | 95,965,743  | 96,628,523  | 5 | 2 | 7 | 0 |
| Case 63 | 8  | 96,630,632  | 101,821,313 | 4 | 2 | 6 | 0 |
| Case 63 | 8  | 101,821,743 | 102,631,911 | 5 | 2 | 7 | 0 |
| Case 63 | 8  | 102,645,085 | 103,940,219 | 4 | 2 | 6 | 0 |
| Case 63 | 8  | 103,940,336 | 105,232,453 | 5 | 1 | 6 | 0 |
| Case 63 | 8  | 105,233,131 | 126,984,970 | 4 | 2 | 6 | 0 |
| Case 63 | 8  | 126,995,907 | 127,291,414 | 5 | 2 | 7 | 0 |
| Case 63 | 8  | 127,292,996 | 128,171,018 | 4 | 2 | 6 | 0 |
| Case 63 | 8  | 128,172,028 | 128,965,552 | 4 | 3 | 7 | 0 |
| Case 63 | 8  | 128,973,665 | 130,316,146 | 4 | 2 | 6 | 0 |
| Case 63 | 8  | 130,320,356 | 146,293,414 | 4 | 1 | 5 | 0 |
| Case 63 | 9  | 46,587      | 9,260,044   | 1 | 1 | 2 | 0 |
| Case 63 | 9  | 9,261,737   | 9,664,440   | 1 | 0 | 1 | 0 |
| Case 63 | 9  | 9,667,071   | 19,234,908  | 1 | 1 | 2 | 0 |
| Case 63 | 9  | 19,235,270  | 19,700,975  | 2 | 1 | 3 | 0 |
| Case 63 | 9  | 19,702,659  | 32,211,402  | 1 | 1 | 2 | 0 |
| Case 63 | 9  | 32,223,204  | 46,944,322  | 2 | 1 | 3 | 0 |
| Case 63 | 9  | 65,629,772  | 95,572,545  | 1 | 1 | 2 | 0 |
| Case 63 | 9  | 95,580,376  | 96,072,452  | 2 | 1 | 3 | 0 |
| Case 63 | 9  | 96,077,465  | 98,957,977  | 1 | 1 | 2 | 0 |
| Case 63 | 9  | 98,958,949  | 116,763,905 | 3 | 1 | 4 | 0 |
| Case 63 | 9  | 116,764,283 | 116,780,992 | 2 | 1 | 3 | 0 |
| Case 63 | 9  | 116,782,921 | 134,258,129 | 3 | 1 | 4 | 0 |
| Case 63 | 9  | 134,258,779 | 134,861,887 | 3 | 2 | 5 | 0 |
| Case 63 | 9  | 134,865,803 | 135,408,571 | 3 | 1 | 4 | 0 |
| Case 63 | 9  | 135,412,993 | 135,867,687 | 2 | 2 | 4 | 0 |
| Case 63 | 9  | 135,867,989 | 139,015,411 | 3 | 1 | 4 | 0 |
| Case 63 | 9  | 139,016,326 | 139,262,205 | 4 | 0 | 4 | 1 |
| Case 63 | 9  | 139,262,253 | 139,731,827 | 4 | 1 | 5 | 0 |
| Case 63 | 9  | 139,732,331 | 141,066,491 | 3 | 1 | 4 | 0 |
| Case 63 | 10 | 98,087      | 4,547,174   | 2 | 2 | 4 | 0 |
| Case 63 | 10 | 4,554,674   | 5,151,083   | 4 | 2 | 6 | 0 |
| Case 63 | 10 | 5,159,453   | 5,937,094   | 4 | 3 | 7 | 0 |
| Case 63 | 10 | 5,944,415   | 6,063,016   | 2 | 2 | 4 | 0 |
| Case 63 | 10 | 6,063,253   | 6,114,856   | 3 | 2 | 5 | 0 |
| Case 63 | 10 | 6,118,966   | 11,712,965  | 2 | 2 | 4 | 0 |
| Case 63 | 10 | 11,713,277  | 11,943,885  | 3 | 2 | 5 | 0 |
| Case 63 | 10 | 11,944,213  | 19,057,868  | 2 | 2 | 4 | 0 |
| Case 63 | 10 | 19,061,889  | 19,174,999  | 3 | 2 | 5 | 0 |
| Case 63 | 10 | 19,190,079  | 39,070,516  | 2 | 2 | 4 | 0 |
| Case 63 | 10 | 39,088,829  | 39,097,912  | 2 | 1 | 3 | 0 |
| Case 63 | 10 | 42,436,301  | 75,905,996  | 2 | 1 | 3 | 0 |

|         |    |             |             |   |   |   |   |
|---------|----|-------------|-------------|---|---|---|---|
| Case 63 | 10 | 75,911,276  | 76,757,407  | 2 | 0 | 2 | 1 |
| Case 63 | 10 | 76,760,631  | 80,458,157  | 2 | 1 | 3 | 0 |
| Case 63 | 10 | 80,459,780  | 81,212,186  | 3 | 1 | 4 | 0 |
| Case 63 | 10 | 81,212,511  | 90,748,736  | 2 | 1 | 3 | 0 |
| Case 63 | 10 | 90,749,963  | 91,389,738  | 2 | 2 | 4 | 0 |
| Case 63 | 10 | 91,393,013  | 120,650,662 | 2 | 1 | 3 | 0 |
| Case 63 | 10 | 120,663,911 | 121,203,194 | 3 | 1 | 4 | 0 |
| Case 63 | 10 | 121,207,272 | 122,429,367 | 2 | 1 | 3 | 0 |
| Case 63 | 10 | 122,430,075 | 123,661,722 | 2 | 2 | 4 | 0 |
| Case 63 | 10 | 123,662,106 | 123,933,923 | 3 | 1 | 4 | 0 |
| Case 63 | 10 | 123,937,461 | 124,050,648 | 4 | 1 | 5 | 0 |
| Case 63 | 10 | 124,058,549 | 124,648,997 | 3 | 1 | 4 | 0 |
| Case 63 | 10 | 124,660,458 | 135,477,883 | 2 | 1 | 3 | 0 |
| Case 63 | 11 | 193,146     | 34,633,745  | 2 | 1 | 3 | 0 |
| Case 63 | 11 | 34,637,669  | 34,672,161  | 2 | 0 | 2 | 1 |
| Case 63 | 11 | 34,672,889  | 38,205,546  | 2 | 1 | 3 | 0 |
| Case 63 | 11 | 38,211,902  | 38,340,284  | 3 | 1 | 4 | 0 |
| Case 63 | 11 | 38,345,032  | 51,591,253  | 2 | 1 | 3 | 0 |
| Case 63 | 11 | 54,794,237  | 67,760,366  | 2 | 1 | 3 | 0 |
| Case 63 | 11 | 67,764,091  | 73,408,272  | 2 | 0 | 2 | 1 |
| Case 63 | 11 | 73,411,927  | 73,850,837  | 3 | 0 | 3 | 1 |
| Case 63 | 11 | 73,863,411  | 74,053,573  | 2 | 0 | 2 | 1 |
| Case 63 | 11 | 74,053,623  | 74,660,292  | 3 | 0 | 3 | 1 |
| Case 63 | 11 | 74,664,025  | 76,154,846  | 2 | 1 | 3 | 0 |
| Case 63 | 11 | 76,155,555  | 77,749,228  | 3 | 1 | 4 | 0 |
| Case 63 | 11 | 77,773,715  | 80,059,033  | 2 | 1 | 3 | 0 |
| Case 63 | 11 | 80,062,406  | 80,140,069  | 1 | 1 | 2 | 0 |
| Case 63 | 11 | 80,140,376  | 110,721,187 | 2 | 1 | 3 | 0 |
| Case 63 | 11 | 110,722,129 | 111,666,128 | 3 | 1 | 4 | 0 |
| Case 63 | 11 | 111,673,539 | 117,906,510 | 2 | 1 | 3 | 0 |
| Case 63 | 11 | 117,909,101 | 118,773,140 | 2 | 2 | 4 | 0 |
| Case 63 | 11 | 118,779,309 | 134,934,063 | 2 | 1 | 3 | 0 |
| Case 63 | 12 | 191,619     | 11,521,626  | 1 | 1 | 2 | 0 |
| Case 63 | 12 | 11,543,002  | 16,711,631  | 2 | 1 | 3 | 0 |
| Case 63 | 12 | 16,712,583  | 18,137,158  | 1 | 1 | 2 | 0 |
| Case 63 | 12 | 18,141,629  | 18,684,104  | 1 | 0 | 1 | 0 |
| Case 63 | 12 | 18,685,521  | 25,921,843  | 1 | 1 | 2 | 0 |
| Case 63 | 12 | 25,930,414  | 29,149,089  | 5 | 1 | 6 | 0 |
| Case 63 | 12 | 29,180,359  | 34,853,011  | 3 | 1 | 4 | 0 |
| Case 63 | 12 | 37,876,400  | 40,310,608  | 3 | 1 | 4 | 0 |
| Case 63 | 12 | 40,311,493  | 40,609,581  | 2 | 1 | 3 | 0 |
| Case 63 | 12 | 40,609,883  | 53,840,377  | 3 | 1 | 4 | 0 |
| Case 63 | 12 | 53,846,595  | 54,575,620  | 4 | 1 | 5 | 0 |
| Case 63 | 12 | 54,576,323  | 57,649,840  | 3 | 1 | 4 | 0 |
| Case 63 | 12 | 57,653,576  | 58,631,149  | 3 | 2 | 5 | 0 |
| Case 63 | 12 | 58,632,584  | 120,785,685 | 3 | 1 | 4 | 0 |
| Case 63 | 12 | 120,786,083 | 121,249,004 | 2 | 2 | 4 | 0 |
| Case 63 | 12 | 121,256,520 | 133,810,935 | 3 | 1 | 4 | 0 |
| Case 63 | 13 | 19,058,717  | 20,688,590  | 4 | 1 | 5 | 0 |
| Case 63 | 13 | 20,689,298  | 30,407,398  | 3 | 1 | 4 | 0 |
| Case 63 | 13 | 30,419,601  | 30,770,760  | 4 | 1 | 5 | 0 |
| Case 63 | 13 | 30,773,281  | 41,485,061  | 3 | 1 | 4 | 0 |
| Case 63 | 13 | 41,494,967  | 42,352,171  | 4 | 1 | 5 | 0 |
| Case 63 | 13 | 42,363,295  | 64,345,041  | 3 | 1 | 4 | 0 |
| Case 63 | 13 | 64,346,536  | 64,662,462  | 3 | 0 | 3 | 1 |
| Case 63 | 13 | 64,703,769  | 73,656,032  | 4 | 1 | 5 | 0 |
| Case 63 | 13 | 73,658,254  | 73,892,459  | 4 | 2 | 6 | 0 |
| Case 63 | 13 | 73,896,221  | 74,661,811  | 3 | 2 | 5 | 0 |
| Case 63 | 13 | 74,662,850  | 109,502,849 | 4 | 1 | 5 | 0 |
| Case 63 | 13 | 109,504,041 | 115,103,529 | 3 | 1 | 4 | 0 |
| Case 63 | 14 | 19,280,733  | 20,470,737  | 2 | 1 | 3 | 0 |



|         |    |             |             |    |   |    |   |
|---------|----|-------------|-------------|----|---|----|---|
| Case 63 | 14 | 20,470,903  | 22,340,647  | 3  | 1 | 4  | 0 |
| Case 63 | 14 | 22,340,873  | 22,964,782  | 4  | 1 | 5  | 0 |
| Case 63 | 14 | 22,966,662  | 54,560,018  | 3  | 1 | 4  | 0 |
| Case 63 | 14 | 54,560,096  | 54,891,654  | 3  | 2 | 5  | 0 |
| Case 63 | 14 | 54,892,999  | 64,035,971  | 3  | 1 | 4  | 0 |
| Case 63 | 14 | 64,054,767  | 64,345,158  | 3  | 2 | 5  | 0 |
| Case 63 | 14 | 64,346,190  | 64,739,505  | 3  | 1 | 4  | 0 |
| Case 63 | 14 | 64,740,175  | 65,414,372  | 3  | 2 | 5  | 0 |
| Case 63 | 14 | 65,417,070  | 103,194,998 | 3  | 1 | 4  | 0 |
| Case 63 | 14 | 103,199,316 | 103,290,938 | 3  | 0 | 3  | 1 |
| Case 63 | 14 | 103,291,031 | 107,287,663 | 3  | 1 | 4  | 0 |
| Case 63 | 15 | 20,034,919  | 51,558,731  | 1  | 1 | 2  | 0 |
| Case 63 | 15 | 51,569,410  | 52,133,914  | 2  | 1 | 3  | 0 |
| Case 63 | 15 | 52,144,304  | 78,770,683  | 1  | 1 | 2  | 0 |
| Case 63 | 15 | 78,779,384  | 86,720,146  | 2  | 1 | 3  | 0 |
| Case 63 | 15 | 86,726,594  | 89,949,210  | 1  | 1 | 2  | 0 |
| Case 63 | 15 | 89,951,742  | 90,622,936  | 2  | 1 | 3  | 0 |
| Case 63 | 15 | 90,623,052  | 102,461,162 | 1  | 1 | 2  | 0 |
| Case 63 | 16 | 88,165      | 14,586,821  | 2  | 1 | 3  | 0 |
| Case 63 | 16 | 14,618,311  | 19,288,435  | 3  | 1 | 4  | 0 |
| Case 63 | 16 | 19,289,237  | 20,499,397  | 4  | 1 | 5  | 0 |
| Case 63 | 16 | 20,521,796  | 20,635,247  | 6  | 1 | 7  | 0 |
| Case 63 | 16 | 20,635,418  | 20,810,074  | 5  | 1 | 6  | 0 |
| Case 63 | 16 | 20,810,266  | 21,317,295  | 7  | 0 | 7  | 1 |
| Case 63 | 16 | 21,608,472  | 35,285,582  | 2  | 1 | 3  | 0 |
| Case 63 | 16 | 46,450,037  | 75,095,695  | 2  | 1 | 3  | 0 |
| Case 63 | 16 | 75,102,952  | 75,448,587  | 3  | 1 | 4  | 0 |
| Case 63 | 16 | 75,467,223  | 78,837,743  | 2  | 1 | 3  | 0 |
| Case 63 | 16 | 78,837,772  | 79,199,110  | 2  | 0 | 2  | 1 |
| Case 63 | 16 | 79,199,372  | 90,274,695  | 2  | 1 | 3  | 0 |
| Case 63 | 17 | 11,885      | 602,613     | 2  | 0 | 2  | 1 |
| Case 63 | 17 | 608,209     | 784,417     | 3  | 0 | 3  | 1 |
| Case 63 | 17 | 784,963     | 1,614,225   | 4  | 0 | 4  | 1 |
| Case 63 | 17 | 1,616,093   | 8,891,595   | 3  | 0 | 3  | 1 |
| Case 63 | 17 | 8,905,016   | 16,450,583  | 4  | 0 | 4  | 1 |
| Case 63 | 17 | 16,453,907  | 22,242,355  | 3  | 0 | 3  | 1 |
| Case 63 | 17 | 25,268,142  | 25,268,142  | 3  | 0 | 3  | 1 |
| Case 63 | 17 | 25,295,032  | 25,564,116  | 4  | 2 | 6  | 0 |
| Case 63 | 17 | 25,566,997  | 25,974,442  | 3  | 2 | 5  | 0 |
| Case 63 | 17 | 25,990,033  | 26,007,668  | 4  | 3 | 7  | 0 |
| Case 63 | 17 | 26,018,955  | 26,209,665  | 3  | 2 | 5  | 0 |
| Case 63 | 17 | 26,210,388  | 36,244,358  | 2  | 2 | 4  | 0 |
| Case 63 | 17 | 36,307,189  | 37,687,178  | 5  | 1 | 6  | 0 |
| Case 63 | 17 | 37,687,363  | 37,830,282  | 11 | 0 | 11 | 1 |
| Case 63 | 17 | 37,830,888  | 37,840,860  | 17 | 1 | 18 | 0 |
| Case 63 | 17 | 37,840,912  | 38,753,550  | 9  | 0 | 9  | 1 |
| Case 63 | 17 | 38,754,800  | 39,959,433  | 9  | 1 | 10 | 0 |
| Case 63 | 17 | 39,965,958  | 41,622,705  | 2  | 1 | 3  | 0 |
| Case 63 | 17 | 41,622,970  | 42,270,977  | 4  | 1 | 5  | 0 |
| Case 63 | 17 | 42,272,470  | 45,367,077  | 2  | 1 | 3  | 0 |
| Case 63 | 17 | 45,367,092  | 45,878,845  | 2  | 2 | 4  | 0 |
| Case 63 | 17 | 45,880,748  | 48,083,846  | 2  | 1 | 3  | 0 |
| Case 63 | 17 | 48,103,935  | 49,030,596  | 4  | 1 | 5  | 0 |
| Case 63 | 17 | 49,035,711  | 60,613,661  | 2  | 1 | 3  | 0 |
| Case 63 | 17 | 60,631,102  | 60,709,277  | 2  | 2 | 4  | 0 |
| Case 63 | 17 | 60,712,031  | 65,882,373  | 2  | 1 | 3  | 0 |
| Case 63 | 17 | 65,883,081  | 76,134,249  | 2  | 2 | 4  | 0 |
| Case 63 | 17 | 76,134,452  | 76,246,294  | 3  | 2 | 5  | 0 |
| Case 63 | 17 | 76,248,130  | 77,839,025  | 2  | 2 | 4  | 0 |
| Case 63 | 17 | 77,839,811  | 77,948,791  | 3  | 1 | 4  | 0 |
| Case 63 | 17 | 77,950,014  | 78,349,572  | 2  | 2 | 4  | 0 |

|         |    |            |            |    |   |    |   |
|---------|----|------------|------------|----|---|----|---|
| Case 63 | 17 | 78,350,110 | 79,077,377 | 2  | 1 | 3  | 0 |
| Case 63 | 17 | 79,077,746 | 79,682,059 | 3  | 1 | 4  | 0 |
| Case 63 | 17 | 79,682,559 | 81,060,040 | 2  | 1 | 3  | 0 |
| Case 63 | 18 | 87,505     | 2,377,088  | 2  | 1 | 3  | 0 |
| Case 63 | 18 | 2,382,377  | 2,788,323  | 2  | 0 | 2  | 1 |
| Case 63 | 18 | 2,791,071  | 3,215,086  | 2  | 1 | 3  | 0 |
| Case 63 | 18 | 3,215,158  | 3,636,288  | 2  | 2 | 4  | 0 |
| Case 63 | 18 | 3,645,455  | 15,375,878 | 2  | 1 | 3  | 0 |
| Case 63 | 18 | 18,520,354 | 55,002,837 | 2  | 1 | 3  | 0 |
| Case 63 | 18 | 55,008,906 | 55,146,682 | 3  | 1 | 4  | 0 |
| Case 63 | 18 | 55,149,354 | 67,463,335 | 2  | 1 | 3  | 0 |
| Case 63 | 18 | 67,466,068 | 67,747,484 | 2  | 2 | 4  | 0 |
| Case 63 | 18 | 67,753,863 | 72,425,068 | 2  | 1 | 3  | 0 |
| Case 63 | 18 | 72,441,535 | 72,679,334 | 1  | 0 | 1  | 0 |
| Case 63 | 18 | 72,687,307 | 78,015,180 | 2  | 1 | 3  | 0 |
| Case 63 | 19 | 260,912    | 1,510,199  | 2  | 0 | 2  | 1 |
| Case 63 | 19 | 1,510,368  | 2,078,144  | 3  | 0 | 3  | 1 |
| Case 63 | 19 | 2,078,181  | 10,738,643 | 2  | 0 | 2  | 1 |
| Case 63 | 19 | 10,741,957 | 11,034,514 | 3  | 0 | 3  | 1 |
| Case 63 | 19 | 11,034,582 | 16,301,100 | 2  | 0 | 2  | 1 |
| Case 63 | 19 | 16,301,312 | 16,946,764 | 2  | 1 | 3  | 0 |
| Case 63 | 19 | 16,952,586 | 18,312,588 | 2  | 0 | 2  | 1 |
| Case 63 | 19 | 18,313,515 | 18,557,592 | 2  | 1 | 3  | 0 |
| Case 63 | 19 | 18,557,617 | 18,719,009 | 2  | 0 | 2  | 1 |
| Case 63 | 19 | 18,724,695 | 19,369,360 | 3  | 0 | 3  | 1 |
| Case 63 | 19 | 19,369,401 | 21,215,212 | 2  | 0 | 2  | 1 |
| Case 63 | 19 | 21,216,979 | 21,283,449 | 1  | 0 | 1  | 0 |
| Case 63 | 19 | 21,284,220 | 24,545,366 | 2  | 0 | 2  | 1 |
| Case 63 | 19 | 24,629,285 | 24,629,285 | 3  | 1 | 4  | 0 |
| Case 63 | 19 | 27,732,159 | 28,967,575 | 3  | 1 | 4  | 0 |
| Case 63 | 19 | 28,969,649 | 29,486,865 | 11 | 0 | 11 | 1 |
| Case 63 | 19 | 29,487,317 | 29,810,905 | 9  | 0 | 9  | 1 |
| Case 63 | 19 | 29,813,253 | 30,117,442 | 11 | 0 | 11 | 1 |
| Case 63 | 19 | 30,119,907 | 30,202,367 | 14 | 0 | 14 | 1 |
| Case 63 | 19 | 30,203,872 | 30,376,718 | 11 | 0 | 11 | 1 |
| Case 63 | 19 | 30,378,841 | 30,539,739 | 17 | 0 | 17 | 1 |
| Case 63 | 19 | 30,546,184 | 30,610,400 | 14 | 0 | 14 | 1 |
| Case 63 | 19 | 30,612,444 | 30,803,054 | 10 | 0 | 10 | 1 |
| Case 63 | 19 | 30,806,165 | 39,190,588 | 2  | 1 | 3  | 0 |
| Case 63 | 19 | 39,195,558 | 41,003,463 | 2  | 2 | 4  | 0 |
| Case 63 | 19 | 41,003,491 | 41,945,795 | 2  | 1 | 3  | 0 |
| Case 63 | 19 | 41,947,635 | 42,521,108 | 2  | 2 | 4  | 0 |
| Case 63 | 19 | 42,524,139 | 54,502,954 | 2  | 1 | 3  | 0 |
| Case 63 | 19 | 54,511,915 | 54,971,026 | 3  | 1 | 4  | 0 |
| Case 63 | 19 | 54,971,229 | 55,019,261 | 4  | 1 | 5  | 0 |
| Case 63 | 19 | 55,019,324 | 59,097,160 | 2  | 1 | 3  | 0 |
| Case 63 | 20 | 63,244     | 14,191,827 | 3  | 2 | 5  | 0 |
| Case 63 | 20 | 14,205,048 | 14,309,952 | 3  | 1 | 4  | 0 |
| Case 63 | 20 | 14,317,390 | 14,776,940 | 2  | 2 | 4  | 0 |
| Case 63 | 20 | 14,780,319 | 14,833,762 | 3  | 1 | 4  | 0 |
| Case 63 | 20 | 14,837,965 | 15,111,138 | 3  | 2 | 5  | 0 |
| Case 63 | 20 | 15,113,642 | 15,234,769 | 2  | 1 | 3  | 0 |
| Case 63 | 20 | 15,237,052 | 15,406,124 | 3  | 1 | 4  | 0 |
| Case 63 | 20 | 15,411,170 | 17,275,533 | 3  | 2 | 5  | 0 |
| Case 63 | 20 | 17,279,522 | 17,660,743 | 3  | 3 | 6  | 0 |
| Case 63 | 20 | 17,669,186 | 26,293,985 | 3  | 2 | 5  | 0 |
| Case 63 | 20 | 29,425,357 | 31,815,358 | 3  | 2 | 5  | 0 |
| Case 63 | 20 | 31,819,789 | 32,779,379 | 3  | 1 | 4  | 0 |
| Case 63 | 20 | 32,784,494 | 50,461,331 | 2  | 2 | 4  | 0 |
| Case 63 | 20 | 50,464,581 | 54,467,126 | 3  | 2 | 5  | 0 |
| Case 63 | 20 | 54,468,058 | 62,948,788 | 2  | 2 | 4  | 0 |

|         |    |             |             |   |   |   |   |
|---------|----|-------------|-------------|---|---|---|---|
| Case 63 | 21 | 10,827,533  | 10,971,337  | 2 | 1 | 3 | 0 |
| Case 63 | 21 | 14,368,320  | 39,951,162  | 2 | 1 | 3 | 0 |
| Case 63 | 21 | 39,953,486  | 40,483,956  | 2 | 2 | 4 | 0 |
| Case 63 | 21 | 40,484,010  | 44,519,655  | 2 | 1 | 3 | 0 |
| Case 63 | 21 | 44,525,219  | 44,618,563  | 3 | 1 | 4 | 0 |
| Case 63 | 21 | 44,628,741  | 44,852,616  | 2 | 1 | 3 | 0 |
| Case 63 | 21 | 44,853,859  | 45,019,965  | 3 | 1 | 4 | 0 |
| Case 63 | 21 | 45,031,458  | 48,100,155  | 2 | 1 | 3 | 0 |
| Case 63 | 22 | 16,114,244  | 39,395,612  | 2 | 0 | 2 | 1 |
| Case 63 | 22 | 39,399,438  | 39,687,484  | 3 | 0 | 3 | 1 |
| Case 63 | 22 | 39,694,225  | 41,268,925  | 2 | 0 | 2 | 1 |
| Case 63 | 22 | 41,272,143  | 42,057,349  | 3 | 0 | 3 | 1 |
| Case 63 | 22 | 42,062,767  | 42,995,724  | 2 | 0 | 2 | 1 |
| Case 63 | 22 | 42,996,149  | 43,252,335  | 3 | 0 | 3 | 1 |
| Case 63 | 22 | 43,260,427  | 45,568,511  | 2 | 0 | 2 | 1 |
| Case 63 | 22 | 45,568,986  | 46,805,772  | 3 | 0 | 3 | 1 |
| Case 63 | 22 | 46,807,234  | 51,195,728  | 2 | 0 | 2 | 1 |
| Case 63 | X  | 2,700,157   | 58,488,110  | 2 | 0 | 2 | 1 |
| Case 63 | X  | 61,694,576  | 154,898,561 | 2 | 0 | 2 | 1 |
| Case 64 | 1  | 82,154      | 121,346,616 | 1 | 1 | 2 | 0 |
| Case 64 | 1  | 142,649,718 | 249,218,992 | 1 | 1 | 2 | 0 |
| Case 64 | 2  | 18,674      | 92,081,640  | 1 | 1 | 2 | 0 |
| Case 64 | 2  | 95,429,424  | 243,048,760 | 1 | 1 | 2 | 0 |
| Case 64 | 3  | 61,495      | 90,442,925  | 1 | 1 | 2 | 0 |
| Case 64 | 3  | 93,537,290  | 197,838,262 | 1 | 1 | 2 | 0 |
| Case 64 | 4  | 71,566      | 49,620,898  | 1 | 1 | 2 | 0 |
| Case 64 | 4  | 52,697,856  | 190,963,766 | 1 | 1 | 2 | 0 |
| Case 64 | 5  | 38,139      | 46,399,093  | 1 | 1 | 2 | 0 |
| Case 64 | 5  | 49,457,282  | 180,693,127 | 1 | 1 | 2 | 0 |
| Case 64 | 6  | 108,666     | 58,752,089  | 1 | 1 | 2 | 0 |
| Case 64 | 6  | 61,891,118  | 170,980,171 | 1 | 1 | 2 | 0 |
| Case 64 | 7  | 44,935      | 58,019,061  | 1 | 1 | 2 | 0 |
| Case 64 | 7  | 61,056,053  | 159,119,486 | 1 | 1 | 2 | 0 |
| Case 64 | 8  | 164,984     | 43,791,691  | 1 | 1 | 2 | 0 |
| Case 64 | 8  | 46,886,735  | 146,293,414 | 1 | 1 | 2 | 0 |
| Case 64 | 9  | 46,587      | 46,944,322  | 1 | 1 | 2 | 0 |
| Case 64 | 9  | 65,629,772  | 141,066,491 | 1 | 1 | 2 | 0 |
| Case 64 | 10 | 98,087      | 39,097,912  | 1 | 1 | 2 | 0 |
| Case 64 | 10 | 42,436,301  | 135,477,883 | 1 | 1 | 2 | 0 |
| Case 64 | 11 | 193,146     | 51,591,253  | 1 | 1 | 2 | 0 |
| Case 64 | 11 | 54,794,237  | 134,934,063 | 1 | 1 | 2 | 0 |
| Case 64 | 12 | 191,619     | 34,853,011  | 1 | 1 | 2 | 0 |
| Case 64 | 12 | 37,876,400  | 133,810,935 | 1 | 1 | 2 | 0 |
| Case 64 | 13 | 19,058,717  | 115,103,529 | 1 | 1 | 2 | 0 |
| Case 64 | 14 | 19,280,733  | 107,287,663 | 1 | 1 | 2 | 0 |
| Case 64 | 15 | 20,034,919  | 102,461,162 | 1 | 1 | 2 | 0 |
| Case 64 | 16 | 88,165      | 35,285,582  | 1 | 1 | 2 | 0 |
| Case 64 | 16 | 46,450,037  | 90,274,695  | 1 | 1 | 2 | 0 |
| Case 64 | 17 | 11,885      | 22,242,355  | 1 | 1 | 2 | 0 |
| Case 64 | 17 | 25,268,142  | 81,060,040  | 1 | 1 | 2 | 0 |
| Case 64 | 18 | 87,505      | 15,375,878  | 1 | 1 | 2 | 0 |
| Case 64 | 18 | 18,520,354  | 78,015,180  | 1 | 1 | 2 | 0 |
| Case 64 | 19 | 260,912     | 24,629,285  | 1 | 1 | 2 | 0 |
| Case 64 | 19 | 27,732,159  | 59,097,160  | 1 | 1 | 2 | 0 |
| Case 64 | 20 | 63,244      | 26,293,985  | 1 | 1 | 2 | 0 |
| Case 64 | 20 | 29,425,357  | 62,948,788  | 1 | 1 | 2 | 0 |
| Case 64 | 21 | 10,827,533  | 10,971,337  | 1 | 1 | 2 | 0 |
| Case 64 | 21 | 14,368,320  | 48,100,155  | 1 | 1 | 2 | 0 |
| Case 64 | 22 | 16,114,244  | 51,195,728  | 1 | 1 | 2 | 0 |
| Case 64 | X  | 2,700,157   | 58,488,110  | 1 | 1 | 2 | 0 |
| Case 64 | X  | 61,694,576  | 154,898,561 | 1 | 1 | 2 | 0 |

|         |    |             |             |   |   |   |   |
|---------|----|-------------|-------------|---|---|---|---|
| Case 65 | 1  | 82,154      | 121,346,616 | 1 | 1 | 2 | 0 |
| Case 65 | 1  | 142,649,718 | 249,218,992 | 1 | 1 | 2 | 0 |
| Case 65 | 2  | 18,674      | 66,956,820  | 2 | 1 | 3 | 0 |
| Case 65 | 2  | 66,963,401  | 68,350,615  | 1 | 1 | 2 | 0 |
| Case 65 | 2  | 68,350,891  | 92,081,640  | 2 | 1 | 3 | 0 |
| Case 65 | 2  | 95,429,424  | 126,477,788 | 2 | 1 | 3 | 0 |
| Case 65 | 2  | 126,488,824 | 127,898,467 | 1 | 1 | 2 | 0 |
| Case 65 | 2  | 127,901,657 | 137,509,045 | 2 | 1 | 3 | 0 |
| Case 65 | 2  | 137,514,418 | 137,980,318 | 1 | 1 | 2 | 0 |
| Case 65 | 2  | 137,981,047 | 243,048,760 | 2 | 1 | 3 | 0 |
| Case 65 | 3  | 61,495      | 710,880     | 1 | 1 | 2 | 0 |
| Case 65 | 3  | 712,551     | 50,534,635  | 2 | 1 | 3 | 0 |
| Case 65 | 3  | 50,549,867  | 58,056,192  | 1 | 1 | 2 | 0 |
| Case 65 | 3  | 58,057,684  | 59,741,758  | 2 | 1 | 3 | 0 |
| Case 65 | 3  | 59,749,703  | 60,069,828  | 1 | 1 | 2 | 0 |
| Case 65 | 3  | 60,070,931  | 90,442,925  | 2 | 1 | 3 | 0 |
| Case 65 | 3  | 93,537,290  | 197,838,262 | 2 | 1 | 3 | 0 |
| Case 65 | 4  | 71,566      | 49,620,898  | 2 | 1 | 3 | 0 |
| Case 65 | 4  | 52,697,856  | 55,569,146  | 2 | 1 | 3 | 0 |
| Case 65 | 4  | 55,569,954  | 190,963,766 | 1 | 1 | 2 | 0 |
| Case 65 | 5  | 38,139      | 46,399,093  | 2 | 1 | 3 | 0 |
| Case 65 | 5  | 49,457,282  | 180,693,127 | 2 | 1 | 3 | 0 |
| Case 65 | 6  | 108,666     | 58,752,089  | 1 | 1 | 2 | 0 |
| Case 65 | 6  | 61,891,118  | 170,980,171 | 1 | 1 | 2 | 0 |
| Case 65 | 7  | 44,935      | 83,185      | 2 | 1 | 3 | 0 |
| Case 65 | 7  | 93,811      | 3,113,034   | 1 | 1 | 2 | 0 |
| Case 65 | 7  | 3,117,874   | 55,481,389  | 2 | 1 | 3 | 0 |
| Case 65 | 7  | 55,489,494  | 58,019,061  | 1 | 1 | 2 | 0 |
| Case 65 | 7  | 61,056,053  | 77,762,326  | 1 | 1 | 2 | 0 |
| Case 65 | 7  | 77,764,079  | 110,678,370 | 2 | 1 | 3 | 0 |
| Case 65 | 7  | 110,678,928 | 111,317,219 | 1 | 1 | 2 | 0 |
| Case 65 | 7  | 111,319,190 | 159,119,486 | 2 | 1 | 3 | 0 |
| Case 65 | 8  | 164,984     | 43,791,691  | 2 | 1 | 3 | 0 |
| Case 65 | 8  | 46,886,735  | 146,293,414 | 2 | 1 | 3 | 0 |
| Case 65 | 9  | 46,587      | 17,581,039  | 1 | 1 | 2 | 0 |
| Case 65 | 9  | 17,585,896  | 21,620,510  | 2 | 1 | 3 | 0 |
| Case 65 | 9  | 21,626,200  | 25,049,865  | 1 | 1 | 2 | 0 |
| Case 65 | 9  | 25,068,476  | 25,872,205  | 2 | 1 | 3 | 0 |
| Case 65 | 9  | 25,878,901  | 46,944,322  | 1 | 1 | 2 | 0 |
| Case 65 | 9  | 65,629,772  | 81,782,185  | 2 | 1 | 3 | 0 |
| Case 65 | 9  | 81,784,956  | 103,976,442 | 1 | 1 | 2 | 0 |
| Case 65 | 9  | 103,981,628 | 104,279,275 | 2 | 1 | 3 | 0 |
| Case 65 | 9  | 104,291,812 | 141,066,491 | 1 | 1 | 2 | 0 |
| Case 65 | 10 | 98,087      | 39,097,912  | 1 | 1 | 2 | 0 |
| Case 65 | 10 | 42,436,301  | 111,406,295 | 1 | 1 | 2 | 0 |
| Case 65 | 10 | 111,421,513 | 111,524,203 | 2 | 1 | 3 | 0 |
| Case 65 | 10 | 111,526,007 | 135,477,883 | 1 | 1 | 2 | 0 |
| Case 65 | 11 | 193,146     | 5,878,617   | 1 | 1 | 2 | 0 |
| Case 65 | 11 | 5,878,628   | 5,969,073   | 2 | 1 | 3 | 0 |
| Case 65 | 11 | 5,969,185   | 51,591,253  | 1 | 1 | 2 | 0 |
| Case 65 | 11 | 54,794,237  | 134,934,063 | 1 | 1 | 2 | 0 |
| Case 65 | 12 | 191,619     | 34,853,011  | 2 | 1 | 3 | 0 |
| Case 65 | 12 | 37,876,400  | 106,399,983 | 2 | 1 | 3 | 0 |
| Case 65 | 12 | 106,403,227 | 133,810,935 | 1 | 1 | 2 | 0 |
| Case 65 | 13 | 19,058,717  | 22,804,312  | 1 | 1 | 2 | 0 |
| Case 65 | 13 | 22,804,897  | 23,073,615  | 2 | 1 | 3 | 0 |
| Case 65 | 13 | 23,079,905  | 115,103,529 | 1 | 1 | 2 | 0 |
| Case 65 | 14 | 19,280,733  | 20,445,370  | 2 | 1 | 3 | 0 |
| Case 65 | 14 | 20,445,618  | 22,828,889  | 1 | 1 | 2 | 0 |
| Case 65 | 14 | 22,838,630  | 23,172,289  | 2 | 1 | 3 | 0 |
| Case 65 | 14 | 23,178,307  | 107,287,663 | 1 | 1 | 2 | 0 |

|         |    |             |             |   |   |   |   |
|---------|----|-------------|-------------|---|---|---|---|
| Case 65 | 15 | 20,034,919  | 29,235,279  | 2 | 1 | 3 | 0 |
| Case 65 | 15 | 29,238,202  | 29,493,154  | 1 | 1 | 2 | 0 |
| Case 65 | 15 | 29,496,888  | 102,461,162 | 2 | 1 | 3 | 0 |
| Case 65 | 16 | 88,165      | 3,639,782   | 2 | 1 | 3 | 0 |
| Case 65 | 16 | 3,639,827   | 8,847,672   | 1 | 1 | 2 | 0 |
| Case 65 | 16 | 8,853,787   | 9,436,915   | 2 | 1 | 3 | 0 |
| Case 65 | 16 | 9,437,050   | 19,088,665  | 1 | 1 | 2 | 0 |
| Case 65 | 16 | 19,095,085  | 35,285,582  | 2 | 1 | 3 | 0 |
| Case 65 | 16 | 46,450,037  | 90,274,695  | 1 | 1 | 2 | 0 |
| Case 65 | 17 | 11,885      | 18,607,786  | 1 | 1 | 2 | 0 |
| Case 65 | 17 | 18,618,644  | 22,242,355  | 2 | 1 | 3 | 0 |
| Case 65 | 17 | 25,268,142  | 34,436,708  | 2 | 1 | 3 | 0 |
| Case 65 | 17 | 34,443,811  | 49,916,168  | 1 | 1 | 2 | 0 |
| Case 65 | 17 | 49,921,390  | 70,481,100  | 2 | 1 | 3 | 0 |
| Case 65 | 17 | 70,481,653  | 81,060,040  | 1 | 1 | 2 | 0 |
| Case 65 | 18 | 87,505      | 15,375,878  | 2 | 1 | 3 | 0 |
| Case 65 | 18 | 18,520,354  | 26,162,481  | 2 | 1 | 3 | 0 |
| Case 65 | 18 | 26,162,610  | 78,015,180  | 1 | 1 | 2 | 0 |
| Case 65 | 19 | 260,912     | 24,629,285  | 1 | 1 | 2 | 0 |
| Case 65 | 19 | 27,732,159  | 59,097,160  | 1 | 1 | 2 | 0 |
| Case 65 | 20 | 63,244      | 14,687,769  | 2 | 1 | 3 | 0 |
| Case 65 | 20 | 14,688,519  | 15,296,031  | 1 | 1 | 2 | 0 |
| Case 65 | 20 | 15,299,632  | 26,293,985  | 2 | 1 | 3 | 0 |
| Case 65 | 20 | 29,425,357  | 40,503,781  | 2 | 1 | 3 | 0 |
| Case 65 | 20 | 40,507,210  | 50,966,307  | 1 | 1 | 2 | 0 |
| Case 65 | 20 | 50,979,238  | 59,592,190  | 2 | 1 | 3 | 0 |
| Case 65 | 20 | 59,594,066  | 62,948,788  | 1 | 1 | 2 | 0 |
| Case 65 | 21 | 10,827,533  | 10,971,337  | 1 | 1 | 2 | 0 |
| Case 65 | 21 | 14,368,320  | 48,100,155  | 1 | 1 | 2 | 0 |
| Case 65 | 22 | 16,114,244  | 51,195,728  | 1 | 1 | 2 | 0 |
| Case 65 | X  | 2,700,157   | 31,840,701  | 2 | 1 | 3 | 0 |
| Case 65 | X  | 31,843,230  | 31,883,410  | 1 | 1 | 2 | 0 |
| Case 65 | X  | 31,887,778  | 58,488,110  | 2 | 1 | 3 | 0 |
| Case 65 | X  | 61,694,576  | 134,195,844 | 2 | 1 | 3 | 0 |
| Case 65 | X  | 134,217,301 | 135,254,359 | 1 | 1 | 2 | 0 |
| Case 65 | X  | 135,257,385 | 154,898,561 | 2 | 1 | 3 | 0 |
| Case 66 | 1  | 82,154      | 121,346,616 | 1 | 1 | 2 | 0 |
| Case 66 | 1  | 142,649,718 | 249,218,992 | 1 | 1 | 2 | 0 |
| Case 66 | 2  | 18,674      | 92,081,640  | 1 | 1 | 2 | 0 |
| Case 66 | 2  | 95,429,424  | 243,048,760 | 1 | 1 | 2 | 0 |
| Case 66 | 3  | 61,495      | 90,442,925  | 1 | 1 | 2 | 0 |
| Case 66 | 3  | 93,537,290  | 197,838,262 | 1 | 1 | 2 | 0 |
| Case 66 | 4  | 71,566      | 49,620,898  | 1 | 1 | 2 | 0 |
| Case 66 | 4  | 52,697,856  | 190,963,766 | 1 | 1 | 2 | 0 |
| Case 66 | 5  | 38,139      | 46,399,093  | 1 | 1 | 2 | 0 |
| Case 66 | 5  | 49,457,282  | 180,693,127 | 1 | 1 | 2 | 0 |
| Case 66 | 6  | 108,666     | 58,752,089  | 1 | 1 | 2 | 0 |
| Case 66 | 6  | 61,891,118  | 170,980,171 | 1 | 1 | 2 | 0 |
| Case 66 | 7  | 44,935      | 58,019,061  | 1 | 1 | 2 | 0 |
| Case 66 | 7  | 61,056,053  | 159,119,486 | 1 | 1 | 2 | 0 |
| Case 66 | 8  | 164,984     | 43,791,691  | 1 | 1 | 2 | 0 |
| Case 66 | 8  | 46,886,735  | 146,293,414 | 1 | 1 | 2 | 0 |
| Case 66 | 9  | 46,587      | 46,944,322  | 1 | 1 | 2 | 0 |
| Case 66 | 9  | 65,629,772  | 141,066,491 | 1 | 1 | 2 | 0 |
| Case 66 | 10 | 98,087      | 39,097,912  | 1 | 1 | 2 | 0 |
| Case 66 | 10 | 42,436,301  | 135,477,883 | 1 | 1 | 2 | 0 |
| Case 66 | 11 | 193,146     | 51,591,253  | 1 | 1 | 2 | 0 |
| Case 66 | 11 | 54,794,237  | 134,934,063 | 1 | 1 | 2 | 0 |
| Case 66 | 12 | 191,619     | 34,853,011  | 1 | 1 | 2 | 0 |
| Case 66 | 12 | 37,876,400  | 133,810,935 | 1 | 1 | 2 | 0 |
| Case 66 | 13 | 19,058,717  | 115,103,529 | 1 | 1 | 2 | 0 |

|         |    |             |             |   |   |   |   |
|---------|----|-------------|-------------|---|---|---|---|
| Case 66 | 14 | 19,280,733  | 107,287,663 | 1 | 1 | 2 | 0 |
| Case 66 | 15 | 20,034,919  | 102,461,162 | 1 | 1 | 2 | 0 |
| Case 66 | 16 | 88,165      | 35,285,582  | 1 | 1 | 2 | 0 |
| Case 66 | 16 | 46,450,037  | 90,274,695  | 1 | 1 | 2 | 0 |
| Case 66 | 17 | 11,885      | 22,242,355  | 1 | 1 | 2 | 0 |
| Case 66 | 17 | 25,268,142  | 81,060,040  | 1 | 1 | 2 | 0 |
| Case 66 | 18 | 87,505      | 15,375,878  | 1 | 1 | 2 | 0 |
| Case 66 | 18 | 18,520,354  | 78,015,180  | 1 | 1 | 2 | 0 |
| Case 66 | 19 | 260,912     | 24,629,285  | 1 | 1 | 2 | 0 |
| Case 66 | 19 | 27,732,159  | 59,097,160  | 1 | 1 | 2 | 0 |
| Case 66 | 20 | 63,244      | 26,293,985  | 1 | 1 | 2 | 0 |
| Case 66 | 20 | 29,425,357  | 62,948,788  | 1 | 1 | 2 | 0 |
| Case 66 | 21 | 10,827,533  | 10,971,337  | 1 | 1 | 2 | 0 |
| Case 66 | 21 | 14,368,320  | 48,100,155  | 1 | 1 | 2 | 0 |
| Case 66 | 22 | 16,114,244  | 51,195,728  | 1 | 1 | 2 | 0 |
| Case 66 | X  | 2,700,157   | 58,488,110  | 1 | 0 | 1 | 0 |
| Case 66 | X  | 61,694,576  | 154,898,561 | 1 | 0 | 1 | 0 |
| Case 67 | 1  | 82,154      | 121,346,616 | 1 | 1 | 2 | 0 |
| Case 67 | 1  | 142,649,718 | 190,988,857 | 1 | 1 | 2 | 0 |
| Case 67 | 1  | 190,989,756 | 191,199,033 | 1 | 0 | 1 | 0 |
| Case 67 | 1  | 191,223,734 | 244,015,993 | 1 | 1 | 2 | 0 |
| Case 67 | 1  | 244,023,667 | 249,218,992 | 2 | 1 | 3 | 0 |
| Case 67 | 2  | 18,674      | 11,284,116  | 2 | 0 | 2 | 1 |
| Case 67 | 2  | 11,284,170  | 92,081,640  | 1 | 1 | 2 | 0 |
| Case 67 | 2  | 95,429,424  | 243,048,760 | 1 | 1 | 2 | 0 |
| Case 67 | 3  | 61,495      | 7,222,236   | 1 | 0 | 1 | 0 |
| Case 67 | 3  | 7,225,763   | 10,888,402  | 2 | 1 | 3 | 0 |
| Case 67 | 3  | 10,891,237  | 56,450,723  | 1 | 1 | 2 | 0 |
| Case 67 | 3  | 56,453,197  | 63,624,266  | 1 | 0 | 1 | 0 |
| Case 67 | 3  | 63,628,019  | 66,712,564  | 4 | 1 | 5 | 0 |
| Case 67 | 3  | 66,712,640  | 66,996,179  | 3 | 1 | 4 | 0 |
| Case 67 | 3  | 67,006,795  | 70,909,328  | 4 | 1 | 5 | 0 |
| Case 67 | 3  | 70,910,331  | 73,287,838  | 3 | 1 | 4 | 0 |
| Case 67 | 3  | 73,291,914  | 73,594,445  | 2 | 1 | 3 | 0 |
| Case 67 | 3  | 73,601,210  | 75,726,925  | 3 | 1 | 4 | 0 |
| Case 67 | 3  | 75,734,088  | 90,442,925  | 1 | 1 | 2 | 0 |
| Case 67 | 3  | 93,537,290  | 156,626,091 | 1 | 1 | 2 | 0 |
| Case 67 | 3  | 156,642,634 | 197,838,262 | 2 | 1 | 3 | 0 |
| Case 67 | 4  | 71,566      | 49,620,898  | 1 | 1 | 2 | 0 |
| Case 67 | 4  | 52,697,856  | 187,915,635 | 1 | 1 | 2 | 0 |
| Case 67 | 4  | 187,916,373 | 188,258,978 | 2 | 1 | 3 | 0 |
| Case 67 | 4  | 188,265,382 | 190,963,766 | 1 | 1 | 2 | 0 |
| Case 67 | 5  | 38,139      | 46,117,770  | 1 | 1 | 2 | 0 |
| Case 67 | 5  | 46,127,095  | 46,399,093  | 1 | 0 | 1 | 0 |
| Case 67 | 5  | 49,457,282  | 49,470,083  | 1 | 0 | 1 | 0 |
| Case 67 | 5  | 49,492,838  | 180,693,127 | 1 | 1 | 2 | 0 |
| Case 67 | 6  | 108,666     | 11,551,050  | 1 | 0 | 1 | 0 |
| Case 67 | 6  | 11,575,735  | 33,047,612  | 1 | 1 | 2 | 0 |
| Case 67 | 6  | 33,048,457  | 33,051,910  | 2 | 1 | 3 | 0 |
| Case 67 | 6  | 33,052,736  | 58,752,089  | 1 | 1 | 2 | 0 |
| Case 67 | 6  | 61,891,118  | 93,378,969  | 1 | 1 | 2 | 0 |
| Case 67 | 6  | 93,396,190  | 126,767,600 | 1 | 0 | 1 | 0 |
| Case 67 | 6  | 126,802,598 | 170,980,171 | 1 | 1 | 2 | 0 |
| Case 67 | 7  | 44,935      | 29,876,672  | 2 | 1 | 3 | 0 |
| Case 67 | 7  | 29,878,542  | 58,019,061  | 1 | 1 | 2 | 0 |
| Case 67 | 7  | 61,056,053  | 71,280,299  | 1 | 1 | 2 | 0 |
| Case 67 | 7  | 71,297,516  | 73,239,500  | 2 | 1 | 3 | 0 |
| Case 67 | 7  | 73,239,618  | 91,509,867  | 1 | 1 | 2 | 0 |
| Case 67 | 7  | 91,539,717  | 92,826,850  | 2 | 1 | 3 | 0 |
| Case 67 | 7  | 92,836,316  | 94,368,896  | 1 | 1 | 2 | 0 |
| Case 67 | 7  | 94,375,808  | 96,986,462  | 3 | 1 | 4 | 0 |

|         |    |             |             |    |   |    |   |
|---------|----|-------------|-------------|----|---|----|---|
| Case 67 | 7  | 96,989,624  | 103,074,653 | 2  | 1 | 3  | 0 |
| Case 67 | 7  | 103,084,913 | 110,052,275 | 3  | 1 | 4  | 0 |
| Case 67 | 7  | 110,054,993 | 116,491,214 | 2  | 1 | 3  | 0 |
| Case 67 | 7  | 116,514,404 | 121,999,971 | 1  | 0 | 1  | 0 |
| Case 67 | 7  | 122,001,046 | 127,744,787 | 2  | 1 | 3  | 0 |
| Case 67 | 7  | 127,771,601 | 127,970,913 | 1  | 1 | 2  | 0 |
| Case 67 | 7  | 127,973,408 | 130,065,429 | 2  | 1 | 3  | 0 |
| Case 67 | 7  | 130,079,834 | 133,243,248 | 1  | 0 | 1  | 0 |
| Case 67 | 7  | 133,261,817 | 134,380,776 | 3  | 0 | 3  | 1 |
| Case 67 | 7  | 134,382,784 | 137,689,901 | 3  | 1 | 4  | 0 |
| Case 67 | 7  | 137,692,998 | 141,255,295 | 4  | 1 | 5  | 0 |
| Case 67 | 7  | 141,272,716 | 143,702,008 | 2  | 0 | 2  | 1 |
| Case 67 | 7  | 143,702,011 | 153,374,988 | 1  | 0 | 1  | 0 |
| Case 67 | 7  | 153,378,283 | 158,494,547 | 2  | 0 | 2  | 1 |
| Case 67 | 7  | 158,498,994 | 159,119,486 | 2  | 1 | 3  | 0 |
| Case 67 | 8  | 164,984     | 43,791,691  | 1  | 1 | 2  | 0 |
| Case 67 | 8  | 46,886,735  | 47,429,464  | 1  | 1 | 2  | 0 |
| Case 67 | 8  | 47,469,217  | 140,056,945 | 2  | 1 | 3  | 0 |
| Case 67 | 8  | 140,062,905 | 146,293,414 | 1  | 1 | 2  | 0 |
| Case 67 | 9  | 46,587      | 18,809,482  | 1  | 0 | 1  | 0 |
| Case 67 | 9  | 18,810,029  | 20,690,387  | 4  | 1 | 5  | 0 |
| Case 67 | 9  | 20,700,838  | 20,923,696  | 2  | 1 | 3  | 0 |
| Case 67 | 9  | 20,925,921  | 21,226,832  | 4  | 1 | 5  | 0 |
| Case 67 | 9  | 21,227,670  | 23,186,453  | 2  | 1 | 3  | 0 |
| Case 67 | 9  | 23,188,081  | 23,427,158  | 3  | 1 | 4  | 0 |
| Case 67 | 9  | 23,430,020  | 24,212,352  | 2  | 1 | 3  | 0 |
| Case 67 | 9  | 24,231,246  | 28,305,521  | 1  | 0 | 1  | 0 |
| Case 67 | 9  | 28,309,788  | 28,340,158  | 0  | 0 | 0  | 0 |
| Case 67 | 9  | 28,340,971  | 46,944,322  | 1  | 0 | 1  | 0 |
| Case 67 | 9  | 65,629,772  | 85,282,258  | 2  | 1 | 3  | 0 |
| Case 67 | 9  | 85,288,781  | 95,561,537  | 4  | 1 | 5  | 0 |
| Case 67 | 9  | 95,572,545  | 107,555,077 | 2  | 0 | 2  | 1 |
| Case 67 | 9  | 107,555,306 | 141,066,491 | 1  | 1 | 2  | 0 |
| Case 67 | 10 | 98,087      | 39,097,912  | 1  | 1 | 2  | 0 |
| Case 67 | 10 | 42,436,301  | 135,477,883 | 1  | 1 | 2  | 0 |
| Case 67 | 11 | 193,146     | 1,018,251   | 1  | 1 | 2  | 0 |
| Case 67 | 11 | 1,018,262   | 6,113,332   | 1  | 0 | 1  | 0 |
| Case 67 | 11 | 6,120,908   | 51,591,253  | 1  | 1 | 2  | 0 |
| Case 67 | 11 | 54,794,237  | 62,400,952  | 1  | 1 | 2  | 0 |
| Case 67 | 11 | 62,401,620  | 66,950,374  | 2  | 0 | 2  | 1 |
| Case 67 | 11 | 66,963,425  | 69,248,131  | 3  | 0 | 3  | 1 |
| Case 67 | 11 | 69,252,000  | 70,053,487  | 4  | 0 | 4  | 1 |
| Case 67 | 11 | 70,053,547  | 89,935,586  | 3  | 0 | 3  | 1 |
| Case 67 | 11 | 89,935,908  | 90,630,035  | 2  | 0 | 2  | 1 |
| Case 67 | 11 | 90,630,937  | 97,281,245  | 3  | 0 | 3  | 1 |
| Case 67 | 11 | 97,281,735  | 100,345,438 | 4  | 0 | 4  | 1 |
| Case 67 | 11 | 100,375,968 | 100,718,626 | 9  | 0 | 9  | 1 |
| Case 67 | 11 | 100,720,108 | 102,477,267 | 10 | 0 | 10 | 1 |
| Case 67 | 11 | 102,477,309 | 102,533,698 | 8  | 0 | 8  | 1 |
| Case 67 | 11 | 102,535,700 | 102,772,798 | 10 | 0 | 10 | 1 |
| Case 67 | 11 | 102,774,392 | 102,908,390 | 8  | 0 | 8  | 1 |
| Case 67 | 11 | 102,911,494 | 103,626,209 | 12 | 0 | 12 | 1 |
| Case 67 | 11 | 103,635,415 | 103,820,517 | 9  | 0 | 9  | 1 |
| Case 67 | 11 | 103,833,805 | 119,574,695 | 2  | 0 | 2  | 1 |
| Case 67 | 11 | 119,576,911 | 134,934,063 | 1  | 0 | 1  | 0 |
| Case 67 | 12 | 191,619     | 34,853,011  | 1  | 1 | 2  | 0 |
| Case 67 | 12 | 37,876,400  | 133,810,935 | 1  | 1 | 2  | 0 |
| Case 67 | 13 | 19,058,717  | 56,677,746  | 1  | 1 | 2  | 0 |
| Case 67 | 13 | 56,699,942  | 82,503,963  | 1  | 0 | 1  | 0 |
| Case 67 | 13 | 82,512,318  | 115,103,529 | 1  | 1 | 2  | 0 |
| Case 67 | 14 | 19,280,733  | 20,444,236  | 2  | 2 | 4  | 0 |

|         |    |             |             |   |   |   |   |
|---------|----|-------------|-------------|---|---|---|---|
| Case 67 | 14 | 20,445,370  | 22,098,484  | 1 | 1 | 2 | 0 |
| Case 67 | 14 | 22,099,506  | 22,953,861  | 2 | 1 | 3 | 0 |
| Case 67 | 14 | 22,955,716  | 107,287,663 | 1 | 1 | 2 | 0 |
| Case 67 | 15 | 20,034,919  | 102,461,162 | 1 | 1 | 2 | 0 |
| Case 67 | 16 | 88,165      | 35,285,582  | 1 | 1 | 2 | 0 |
| Case 67 | 16 | 46,450,037  | 77,763,255  | 1 | 1 | 2 | 0 |
| Case 67 | 16 | 77,766,640  | 78,224,186  | 2 | 1 | 3 | 0 |
| Case 67 | 16 | 78,236,048  | 78,487,924  | 1 | 1 | 2 | 0 |
| Case 67 | 16 | 78,491,313  | 78,591,553  | 1 | 0 | 1 | 0 |
| Case 67 | 16 | 78,593,628  | 78,939,658  | 1 | 1 | 2 | 0 |
| Case 67 | 16 | 78,940,747  | 79,085,534  | 1 | 0 | 1 | 0 |
| Case 67 | 16 | 79,085,548  | 90,274,695  | 1 | 1 | 2 | 0 |
| Case 67 | 17 | 11,885      | 5,042,715   | 1 | 1 | 2 | 0 |
| Case 67 | 17 | 5,042,837   | 5,510,258   | 1 | 0 | 1 | 0 |
| Case 67 | 17 | 5,514,590   | 9,683,268   | 1 | 1 | 2 | 0 |
| Case 67 | 17 | 9,683,276   | 22,242,355  | 1 | 0 | 1 | 0 |
| Case 67 | 17 | 25,268,142  | 25,268,142  | 1 | 0 | 1 | 0 |
| Case 67 | 17 | 25,295,032  | 77,273,513  | 1 | 1 | 2 | 0 |
| Case 67 | 17 | 77,273,619  | 77,296,632  | 2 | 1 | 3 | 0 |
| Case 67 | 17 | 77,298,153  | 81,060,040  | 1 | 1 | 2 | 0 |
| Case 67 | 18 | 87,505      | 15,375,878  | 1 | 0 | 1 | 0 |
| Case 67 | 18 | 18,520,354  | 18,556,505  | 1 | 0 | 1 | 0 |
| Case 67 | 18 | 18,561,020  | 38,498,374  | 1 | 1 | 2 | 0 |
| Case 67 | 18 | 38,499,957  | 40,345,564  | 1 | 0 | 1 | 0 |
| Case 67 | 18 | 40,357,460  | 41,626,891  | 1 | 1 | 2 | 0 |
| Case 67 | 18 | 41,627,797  | 49,754,754  | 2 | 1 | 3 | 0 |
| Case 67 | 18 | 49,765,016  | 50,400,650  | 1 | 0 | 1 | 0 |
| Case 67 | 18 | 50,410,686  | 50,894,200  | 2 | 1 | 3 | 0 |
| Case 67 | 18 | 50,900,432  | 51,678,367  | 1 | 0 | 1 | 0 |
| Case 67 | 18 | 51,680,659  | 52,327,216  | 2 | 1 | 3 | 0 |
| Case 67 | 18 | 52,328,815  | 78,015,180  | 1 | 0 | 1 | 0 |
| Case 67 | 19 | 260,912     | 24,629,285  | 1 | 1 | 2 | 0 |
| Case 67 | 19 | 27,732,159  | 54,722,700  | 1 | 1 | 2 | 0 |
| Case 67 | 19 | 54,731,679  | 54,749,011  | 2 | 1 | 3 | 0 |
| Case 67 | 19 | 54,753,543  | 59,097,160  | 1 | 1 | 2 | 0 |
| Case 67 | 20 | 63,244      | 26,293,985  | 1 | 1 | 2 | 0 |
| Case 67 | 20 | 29,425,357  | 32,566,975  | 1 | 1 | 2 | 0 |
| Case 67 | 20 | 32,573,900  | 51,251,485  | 3 | 1 | 4 | 0 |
| Case 67 | 20 | 51,252,989  | 51,277,244  | 4 | 1 | 5 | 0 |
| Case 67 | 20 | 51,278,134  | 62,948,788  | 3 | 1 | 4 | 0 |
| Case 67 | 21 | 10,827,533  | 10,971,337  | 1 | 1 | 2 | 0 |
| Case 67 | 21 | 14,368,320  | 48,100,155  | 1 | 1 | 2 | 0 |
| Case 67 | 22 | 16,114,244  | 51,195,728  | 1 | 1 | 2 | 0 |
| Case 67 | X  | 2,700,157   | 58,488,110  | 2 | 2 | 4 | 0 |
| Case 67 | X  | 61,694,576  | 75,813,915  | 2 | 2 | 4 | 0 |
| Case 67 | X  | 75,824,241  | 78,171,486  | 2 | 0 | 2 | 1 |
| Case 67 | X  | 78,172,806  | 99,840,056  | 1 | 0 | 1 | 0 |
| Case 67 | X  | 99,840,178  | 120,970,548 | 2 | 1 | 3 | 0 |
| Case 67 | X  | 120,970,924 | 121,102,142 | 2 | 0 | 2 | 1 |
| Case 67 | X  | 121,103,707 | 154,898,561 | 2 | 1 | 3 | 0 |
| Case 69 | 1  | 82,154      | 25,573,406  | 2 | 1 | 3 | 0 |
| Case 69 | 1  | 25,598,276  | 28,451,885  | 1 | 0 | 1 | 0 |
| Case 69 | 1  | 28,461,640  | 49,894,407  | 2 | 1 | 3 | 0 |
| Case 69 | 1  | 49,928,063  | 119,081,459 | 1 | 1 | 2 | 0 |
| Case 69 | 1  | 119,095,273 | 121,346,616 | 2 | 1 | 3 | 0 |
| Case 69 | 1  | 142,649,718 | 152,259,742 | 2 | 1 | 3 | 0 |
| Case 69 | 1  | 152,273,168 | 162,361,245 | 1 | 1 | 2 | 0 |
| Case 69 | 1  | 162,363,732 | 162,385,511 | 2 | 1 | 3 | 0 |
| Case 69 | 1  | 162,390,085 | 165,140,955 | 1 | 1 | 2 | 0 |
| Case 69 | 1  | 165,157,400 | 168,566,850 | 2 | 1 | 3 | 0 |
| Case 69 | 1  | 168,568,911 | 192,089,215 | 1 | 1 | 2 | 0 |



|         |   |             |             |   |   |   |   |
|---------|---|-------------|-------------|---|---|---|---|
| Case 69 | 1 | 192,091,291 | 194,368,842 | 2 | 1 | 3 | 0 |
| Case 69 | 1 | 194,377,156 | 219,926,717 | 1 | 1 | 2 | 0 |
| Case 69 | 1 | 219,931,145 | 245,366,662 | 2 | 1 | 3 | 0 |
| Case 69 | 1 | 245,367,423 | 245,543,358 | 1 | 0 | 1 | 0 |
| Case 69 | 1 | 245,550,394 | 249,218,992 | 2 | 1 | 3 | 0 |
| Case 69 | 2 | 18,674      | 17,943,015  | 1 | 1 | 2 | 0 |
| Case 69 | 2 | 17,946,243  | 31,611,143  | 2 | 1 | 3 | 0 |
| Case 69 | 2 | 31,611,238  | 92,081,640  | 1 | 1 | 2 | 0 |
| Case 69 | 2 | 95,429,424  | 137,017,060 | 1 | 1 | 2 | 0 |
| Case 69 | 2 | 137,025,312 | 141,389,182 | 2 | 0 | 2 | 1 |
| Case 69 | 2 | 141,391,918 | 205,379,392 | 1 | 1 | 2 | 0 |
| Case 69 | 2 | 205,379,823 | 206,063,298 | 1 | 0 | 1 | 0 |
| Case 69 | 2 | 206,075,239 | 234,685,503 | 1 | 1 | 2 | 0 |
| Case 69 | 2 | 234,685,527 | 241,846,140 | 2 | 1 | 3 | 0 |
| Case 69 | 2 | 241,855,182 | 241,927,005 | 3 | 1 | 4 | 0 |
| Case 69 | 2 | 241,933,700 | 243,048,760 | 2 | 1 | 3 | 0 |
| Case 69 | 3 | 61,495      | 8,358,721   | 1 | 1 | 2 | 0 |
| Case 69 | 3 | 8,359,650   | 14,708,918  | 1 | 0 | 1 | 0 |
| Case 69 | 3 | 14,709,935  | 60,289,842  | 1 | 1 | 2 | 0 |
| Case 69 | 3 | 60,292,606  | 60,403,658  | 1 | 0 | 1 | 0 |
| Case 69 | 3 | 60,405,004  | 60,531,242  | 1 | 1 | 2 | 0 |
| Case 69 | 3 | 60,536,420  | 60,563,632  | 1 | 0 | 1 | 0 |
| Case 69 | 3 | 60,566,161  | 60,610,341  | 2 | 1 | 3 | 0 |
| Case 69 | 3 | 60,611,613  | 61,096,082  | 1 | 0 | 1 | 0 |
| Case 69 | 3 | 61,098,641  | 61,178,476  | 2 | 0 | 2 | 1 |
| Case 69 | 3 | 61,184,321  | 61,273,798  | 1 | 0 | 1 | 0 |
| Case 69 | 3 | 61,277,745  | 90,442,925  | 2 | 0 | 2 | 1 |
| Case 69 | 3 | 93,537,290  | 141,952,871 | 2 | 0 | 2 | 1 |
| Case 69 | 3 | 141,962,168 | 142,000,804 | 1 | 0 | 1 | 0 |
| Case 69 | 3 | 142,015,590 | 144,277,333 | 2 | 0 | 2 | 1 |
| Case 69 | 3 | 144,283,642 | 146,221,640 | 1 | 0 | 1 | 0 |
| Case 69 | 3 | 146,231,988 | 175,043,656 | 2 | 1 | 3 | 0 |
| Case 69 | 3 | 175,050,468 | 175,296,589 | 3 | 1 | 4 | 0 |
| Case 69 | 3 | 175,326,982 | 189,612,269 | 2 | 1 | 3 | 0 |
| Case 69 | 3 | 189,615,854 | 191,059,322 | 2 | 2 | 4 | 0 |
| Case 69 | 3 | 191,060,954 | 197,838,262 | 2 | 1 | 3 | 0 |
| Case 69 | 4 | 71,566      | 49,620,898  | 2 | 1 | 3 | 0 |
| Case 69 | 4 | 52,697,856  | 56,635,884  | 2 | 1 | 3 | 0 |
| Case 69 | 4 | 56,637,488  | 91,469,221  | 2 | 0 | 2 | 1 |
| Case 69 | 4 | 91,475,787  | 92,028,969  | 1 | 0 | 1 | 0 |
| Case 69 | 4 | 92,036,269  | 105,988,057 | 2 | 0 | 2 | 1 |
| Case 69 | 4 | 106,005,985 | 106,028,073 | 3 | 1 | 4 | 0 |
| Case 69 | 4 | 106,032,945 | 161,095,976 | 2 | 0 | 2 | 1 |
| Case 69 | 4 | 161,097,392 | 161,713,693 | 3 | 0 | 3 | 1 |
| Case 69 | 4 | 161,718,544 | 163,379,149 | 5 | 0 | 5 | 1 |
| Case 69 | 4 | 163,385,544 | 167,022,359 | 7 | 0 | 7 | 1 |
| Case 69 | 4 | 167,023,760 | 167,259,818 | 8 | 0 | 8 | 1 |
| Case 69 | 4 | 167,263,766 | 168,080,117 | 7 | 0 | 7 | 1 |
| Case 69 | 4 | 168,084,157 | 169,801,952 | 1 | 0 | 1 | 0 |
| Case 69 | 4 | 169,812,782 | 171,234,790 | 6 | 0 | 6 | 1 |
| Case 69 | 4 | 171,244,684 | 172,997,356 | 7 | 0 | 7 | 1 |
| Case 69 | 4 | 172,999,916 | 190,963,766 | 1 | 0 | 1 | 0 |
| Case 69 | 5 | 38,139      | 3,292,902   | 2 | 1 | 3 | 0 |
| Case 69 | 5 | 3,302,781   | 7,783,858   | 1 | 1 | 2 | 0 |
| Case 69 | 5 | 7,784,478   | 30,696,023  | 2 | 1 | 3 | 0 |
| Case 69 | 5 | 30,713,080  | 31,228,046  | 3 | 1 | 4 | 0 |
| Case 69 | 5 | 31,229,741  | 33,823,475  | 4 | 1 | 5 | 0 |
| Case 69 | 5 | 33,828,203  | 38,061,840  | 3 | 1 | 4 | 0 |
| Case 69 | 5 | 38,074,854  | 38,105,437  | 5 | 1 | 6 | 0 |
| Case 69 | 5 | 38,106,089  | 38,723,523  | 3 | 1 | 4 | 0 |
| Case 69 | 5 | 38,723,889  | 38,793,697  | 2 | 1 | 3 | 0 |

|         |   |             |             |   |   |   |   |
|---------|---|-------------|-------------|---|---|---|---|
| Case 69 | 5 | 38,794,770  | 44,396,015  | 3 | 1 | 4 | 0 |
| Case 69 | 5 | 44,398,696  | 46,399,093  | 2 | 1 | 3 | 0 |
| Case 69 | 5 | 49,457,282  | 131,233,083 | 2 | 0 | 2 | 1 |
| Case 69 | 5 | 131,251,202 | 131,370,827 | 4 | 0 | 4 | 1 |
| Case 69 | 5 | 131,394,738 | 153,861,047 | 2 | 0 | 2 | 1 |
| Case 69 | 5 | 153,864,515 | 153,992,798 | 1 | 0 | 1 | 0 |
| Case 69 | 5 | 153,995,314 | 168,912,305 | 2 | 0 | 2 | 1 |
| Case 69 | 5 | 168,922,672 | 180,693,127 | 3 | 0 | 3 | 1 |
| Case 69 | 6 | 108,666     | 32,669,018  | 2 | 1 | 3 | 0 |
| Case 69 | 6 | 32,669,084  | 32,679,275  | 3 | 1 | 4 | 0 |
| Case 69 | 6 | 32,679,690  | 58,752,089  | 2 | 1 | 3 | 0 |
| Case 69 | 6 | 61,891,118  | 62,362,867  | 2 | 1 | 3 | 0 |
| Case 69 | 6 | 62,386,554  | 120,641,888 | 1 | 1 | 2 | 0 |
| Case 69 | 6 | 120,649,636 | 121,196,068 | 2 | 1 | 3 | 0 |
| Case 69 | 6 | 121,198,620 | 124,771,282 | 1 | 0 | 1 | 0 |
| Case 69 | 6 | 124,773,048 | 125,116,245 | 2 | 0 | 2 | 1 |
| Case 69 | 6 | 125,122,731 | 143,816,923 | 1 | 1 | 2 | 0 |
| Case 69 | 6 | 143,816,924 | 143,994,199 | 1 | 0 | 1 | 0 |
| Case 69 | 6 | 144,000,856 | 145,907,007 | 1 | 1 | 2 | 0 |
| Case 69 | 6 | 145,932,576 | 147,881,001 | 2 | 0 | 2 | 1 |
| Case 69 | 6 | 147,881,171 | 148,007,144 | 1 | 0 | 1 | 0 |
| Case 69 | 6 | 148,015,300 | 162,349,458 | 2 | 0 | 2 | 1 |
| Case 69 | 6 | 162,349,894 | 162,460,484 | 1 | 0 | 1 | 0 |
| Case 69 | 6 | 162,461,329 | 170,980,171 | 2 | 0 | 2 | 1 |
| Case 69 | 7 | 44,935      | 13,476,506  | 2 | 1 | 3 | 0 |
| Case 69 | 7 | 13,477,214  | 14,288,622  | 3 | 2 | 5 | 0 |
| Case 69 | 7 | 14,292,511  | 16,245,357  | 2 | 2 | 4 | 0 |
| Case 69 | 7 | 16,245,752  | 38,297,145  | 2 | 1 | 3 | 0 |
| Case 69 | 7 | 38,298,285  | 38,363,748  | 2 | 2 | 4 | 0 |
| Case 69 | 7 | 38,363,929  | 58,019,061  | 2 | 1 | 3 | 0 |
| Case 69 | 7 | 61,056,053  | 62,043,624  | 2 | 1 | 3 | 0 |
| Case 69 | 7 | 62,047,108  | 62,479,327  | 1 | 1 | 2 | 0 |
| Case 69 | 7 | 62,510,311  | 159,119,486 | 2 | 1 | 3 | 0 |
| Case 69 | 8 | 164,984     | 2,092,640   | 1 | 0 | 1 | 0 |
| Case 69 | 8 | 2,092,646   | 10,372,068  | 1 | 1 | 2 | 0 |
| Case 69 | 8 | 10,377,861  | 10,924,369  | 2 | 1 | 3 | 0 |
| Case 69 | 8 | 10,937,019  | 11,627,454  | 4 | 0 | 4 | 1 |
| Case 69 | 8 | 11,628,162  | 11,831,477  | 2 | 1 | 3 | 0 |
| Case 69 | 8 | 11,833,262  | 12,916,186  | 1 | 1 | 2 | 0 |
| Case 69 | 8 | 12,917,220  | 12,958,149  | 2 | 1 | 3 | 0 |
| Case 69 | 8 | 12,966,739  | 21,277,933  | 1 | 1 | 2 | 0 |
| Case 69 | 8 | 21,278,526  | 22,238,030  | 2 | 1 | 3 | 0 |
| Case 69 | 8 | 22,239,868  | 22,488,004  | 3 | 1 | 4 | 0 |
| Case 69 | 8 | 22,491,518  | 32,573,583  | 1 | 1 | 2 | 0 |
| Case 69 | 8 | 32,579,109  | 33,371,296  | 2 | 1 | 3 | 0 |
| Case 69 | 8 | 33,384,027  | 37,011,661  | 1 | 1 | 2 | 0 |
| Case 69 | 8 | 37,012,275  | 37,259,045  | 2 | 1 | 3 | 0 |
| Case 69 | 8 | 37,286,161  | 37,797,516  | 1 | 1 | 2 | 0 |
| Case 69 | 8 | 37,809,609  | 38,139,034  | 2 | 1 | 3 | 0 |
| Case 69 | 8 | 38,139,080  | 38,465,928  | 3 | 0 | 3 | 1 |
| Case 69 | 8 | 38,466,443  | 39,486,932  | 5 | 0 | 5 | 1 |
| Case 69 | 8 | 39,494,782  | 40,673,248  | 4 | 0 | 4 | 1 |
| Case 69 | 8 | 40,673,946  | 43,791,691  | 3 | 0 | 3 | 1 |
| Case 69 | 8 | 46,886,735  | 46,942,842  | 3 | 0 | 3 | 1 |
| Case 69 | 8 | 46,944,913  | 100,977,655 | 4 | 0 | 4 | 1 |
| Case 69 | 8 | 100,990,177 | 101,110,024 | 5 | 0 | 5 | 1 |
| Case 69 | 8 | 101,114,794 | 135,768,759 | 4 | 0 | 4 | 1 |
| Case 69 | 8 | 135,769,607 | 135,809,634 | 5 | 0 | 5 | 1 |
| Case 69 | 8 | 135,812,548 | 146,293,414 | 4 | 0 | 4 | 1 |
| Case 69 | 9 | 46,587      | 9,042,840   | 1 | 0 | 1 | 0 |
| Case 69 | 9 | 9,043,421   | 9,763,352   | 0 | 0 | 0 | 0 |

|         |    |             |             |   |   |   |   |
|---------|----|-------------|-------------|---|---|---|---|
| Case 69 | 9  | 9,770,741   | 29,218,907  | 1 | 0 | 1 | 0 |
| Case 69 | 9  | 29,223,296  | 29,640,242  | 3 | 0 | 3 | 1 |
| Case 69 | 9  | 29,647,032  | 46,944,322  | 2 | 0 | 2 | 1 |
| Case 69 | 9  | 65,629,772  | 141,066,491 | 2 | 0 | 2 | 1 |
| Case 69 | 10 | 98,087      | 39,097,912  | 2 | 1 | 3 | 0 |
| Case 69 | 10 | 42,436,301  | 57,757,228  | 2 | 1 | 3 | 0 |
| Case 69 | 10 | 57,762,772  | 58,510,079  | 1 | 1 | 2 | 0 |
| Case 69 | 10 | 58,518,556  | 81,577,614  | 2 | 1 | 3 | 0 |
| Case 69 | 10 | 81,652,266  | 95,459,267  | 2 | 0 | 2 | 1 |
| Case 69 | 10 | 95,459,817  | 96,081,761  | 3 | 0 | 3 | 1 |
| Case 69 | 10 | 96,081,787  | 111,622,694 | 2 | 0 | 2 | 1 |
| Case 69 | 10 | 111,624,141 | 131,869,597 | 2 | 2 | 4 | 0 |
| Case 69 | 10 | 131,871,869 | 135,477,883 | 2 | 1 | 3 | 0 |
| Case 69 | 11 | 193,146     | 34,610,744  | 2 | 1 | 3 | 0 |
| Case 69 | 11 | 34,614,555  | 34,702,640  | 1 | 1 | 2 | 0 |
| Case 69 | 11 | 34,704,565  | 50,248,332  | 2 | 1 | 3 | 0 |
| Case 69 | 11 | 50,280,123  | 51,591,253  | 2 | 0 | 2 | 1 |
| Case 69 | 11 | 54,794,237  | 66,999,244  | 2 | 0 | 2 | 1 |
| Case 69 | 11 | 67,011,765  | 67,033,076  | 4 | 0 | 4 | 1 |
| Case 69 | 11 | 67,034,266  | 67,915,693  | 5 | 0 | 5 | 1 |
| Case 69 | 11 | 67,917,087  | 68,196,830  | 4 | 0 | 4 | 1 |
| Case 69 | 11 | 68,196,961  | 69,230,242  | 5 | 0 | 5 | 1 |
| Case 69 | 11 | 69,231,796  | 69,570,988  | 6 | 0 | 6 | 1 |
| Case 69 | 11 | 69,572,684  | 70,079,002  | 5 | 0 | 5 | 1 |
| Case 69 | 11 | 70,079,854  | 70,478,801  | 4 | 0 | 4 | 1 |
| Case 69 | 11 | 70,484,402  | 134,934,063 | 2 | 0 | 2 | 1 |
| Case 69 | 12 | 191,619     | 34,819,926  | 2 | 1 | 3 | 0 |
| Case 69 | 12 | 34,826,574  | 34,853,011  | 2 | 0 | 2 | 1 |
| Case 69 | 12 | 37,876,400  | 65,670,821  | 2 | 0 | 2 | 1 |
| Case 69 | 12 | 65,671,035  | 133,810,935 | 3 | 0 | 3 | 1 |
| Case 69 | 13 | 19,058,717  | 115,103,529 | 2 | 0 | 2 | 1 |
| Case 69 | 14 | 19,280,733  | 20,443,751  | 3 | 1 | 4 | 0 |
| Case 69 | 14 | 20,443,757  | 22,424,896  | 2 | 1 | 3 | 0 |
| Case 69 | 14 | 22,425,847  | 22,972,986  | 2 | 2 | 4 | 0 |
| Case 69 | 14 | 22,974,256  | 107,287,663 | 2 | 1 | 3 | 0 |
| Case 69 | 15 | 20,034,919  | 24,742,652  | 3 | 0 | 3 | 1 |
| Case 69 | 15 | 24,785,200  | 30,353,491  | 2 | 0 | 2 | 1 |
| Case 69 | 15 | 30,354,303  | 31,734,436  | 1 | 0 | 1 | 0 |
| Case 69 | 15 | 31,736,091  | 66,319,407  | 2 | 0 | 2 | 1 |
| Case 69 | 15 | 66,322,702  | 66,568,700  | 1 | 0 | 1 | 0 |
| Case 69 | 15 | 66,577,043  | 87,847,134  | 2 | 0 | 2 | 1 |
| Case 69 | 15 | 87,847,188  | 87,888,663  | 1 | 0 | 1 | 0 |
| Case 69 | 15 | 87,889,244  | 88,265,779  | 2 | 0 | 2 | 1 |
| Case 69 | 15 | 88,272,469  | 97,593,545  | 3 | 0 | 3 | 1 |
| Case 69 | 15 | 97,593,989  | 102,461,162 | 2 | 0 | 2 | 1 |
| Case 69 | 16 | 88,165      | 336,446     | 1 | 0 | 1 | 0 |
| Case 69 | 16 | 336,660     | 35,285,582  | 1 | 1 | 2 | 0 |
| Case 69 | 16 | 46,450,037  | 53,145,770  | 1 | 1 | 2 | 0 |
| Case 69 | 16 | 53,153,350  | 53,321,892  | 1 | 0 | 1 | 0 |
| Case 69 | 16 | 53,326,860  | 78,151,746  | 1 | 1 | 2 | 0 |
| Case 69 | 16 | 78,153,157  | 78,459,346  | 1 | 0 | 1 | 0 |
| Case 69 | 16 | 78,463,512  | 78,648,998  | 1 | 1 | 2 | 0 |
| Case 69 | 16 | 78,656,489  | 78,749,341  | 1 | 0 | 1 | 0 |
| Case 69 | 16 | 78,754,687  | 90,274,695  | 1 | 1 | 2 | 0 |
| Case 69 | 17 | 11,885      | 22,242,355  | 2 | 0 | 2 | 1 |
| Case 69 | 17 | 25,268,142  | 25,295,032  | 2 | 0 | 2 | 1 |
| Case 69 | 17 | 25,329,949  | 27,520,062  | 1 | 0 | 1 | 0 |
| Case 69 | 17 | 27,524,501  | 81,060,040  | 2 | 0 | 2 | 1 |
| Case 69 | 18 | 87,505      | 15,375,878  | 1 | 1 | 2 | 0 |
| Case 69 | 18 | 18,520,354  | 19,093,933  | 1 | 1 | 2 | 0 |
| Case 69 | 18 | 19,100,763  | 19,177,285  | 2 | 1 | 3 | 0 |

|         |    |             |             |   |   |   |   |
|---------|----|-------------|-------------|---|---|---|---|
| Case 69 | 18 | 19,185,087  | 20,621,714  | 6 | 0 | 6 | 1 |
| Case 69 | 18 | 20,634,130  | 20,664,430  | 4 | 1 | 5 | 0 |
| Case 69 | 18 | 20,672,555  | 22,712,791  | 3 | 1 | 4 | 0 |
| Case 69 | 18 | 22,721,515  | 23,225,488  | 2 | 1 | 3 | 0 |
| Case 69 | 18 | 23,230,546  | 24,122,299  | 4 | 1 | 5 | 0 |
| Case 69 | 18 | 24,123,067  | 25,039,212  | 2 | 1 | 3 | 0 |
| Case 69 | 18 | 25,048,913  | 25,647,288  | 1 | 1 | 2 | 0 |
| Case 69 | 18 | 25,650,000  | 26,037,479  | 3 | 1 | 4 | 0 |
| Case 69 | 18 | 26,045,622  | 36,152,668  | 1 | 1 | 2 | 0 |
| Case 69 | 18 | 36,153,889  | 36,537,526  | 1 | 0 | 1 | 0 |
| Case 69 | 18 | 36,538,967  | 69,543,813  | 1 | 1 | 2 | 0 |
| Case 69 | 18 | 69,546,573  | 69,924,440  | 1 | 0 | 1 | 0 |
| Case 69 | 18 | 69,926,757  | 78,015,180  | 1 | 1 | 2 | 0 |
| Case 69 | 19 | 260,912     | 4,590,877   | 2 | 0 | 2 | 1 |
| Case 69 | 19 | 4,591,634   | 4,640,983   | 1 | 0 | 1 | 0 |
| Case 69 | 19 | 4,647,231   | 24,629,285  | 2 | 0 | 2 | 1 |
| Case 69 | 19 | 27,732,159  | 33,538,414  | 2 | 0 | 2 | 1 |
| Case 69 | 19 | 33,567,565  | 41,341,589  | 3 | 0 | 3 | 1 |
| Case 69 | 19 | 41,350,895  | 41,365,095  | 0 | 0 | 0 | 0 |
| Case 69 | 19 | 41,379,148  | 52,388,229  | 3 | 0 | 3 | 1 |
| Case 69 | 19 | 52,389,627  | 53,521,083  | 2 | 0 | 2 | 1 |
| Case 69 | 19 | 53,522,100  | 57,608,130  | 3 | 0 | 3 | 1 |
| Case 69 | 19 | 57,608,342  | 59,097,160  | 2 | 0 | 2 | 1 |
| Case 69 | 20 | 63,244      | 5,865,636   | 3 | 0 | 3 | 1 |
| Case 69 | 20 | 5,867,491   | 5,917,428   | 2 | 0 | 2 | 1 |
| Case 69 | 20 | 5,918,288   | 13,950,270  | 3 | 0 | 3 | 1 |
| Case 69 | 20 | 13,950,946  | 14,785,705  | 2 | 0 | 2 | 1 |
| Case 69 | 20 | 14,794,361  | 15,031,044  | 1 | 0 | 1 | 0 |
| Case 69 | 20 | 15,037,065  | 15,261,837  | 2 | 0 | 2 | 1 |
| Case 69 | 20 | 15,264,901  | 26,293,985  | 3 | 0 | 3 | 1 |
| Case 69 | 20 | 29,425,357  | 37,689,228  | 3 | 0 | 3 | 1 |
| Case 69 | 20 | 37,690,464  | 59,760,043  | 4 | 0 | 4 | 1 |
| Case 69 | 20 | 59,762,217  | 62,948,788  | 3 | 0 | 3 | 1 |
| Case 69 | 21 | 10,827,533  | 10,971,337  | 1 | 1 | 2 | 0 |
| Case 69 | 21 | 14,368,320  | 17,054,735  | 1 | 1 | 2 | 0 |
| Case 69 | 21 | 17,054,861  | 19,179,271  | 2 | 1 | 3 | 0 |
| Case 69 | 21 | 19,186,614  | 19,601,047  | 3 | 1 | 4 | 0 |
| Case 69 | 21 | 19,607,543  | 22,718,691  | 1 | 1 | 2 | 0 |
| Case 69 | 21 | 22,722,989  | 23,787,309  | 3 | 1 | 4 | 0 |
| Case 69 | 21 | 23,795,193  | 48,100,155  | 1 | 1 | 2 | 0 |
| Case 69 | 22 | 16,114,244  | 51,195,728  | 2 | 0 | 2 | 1 |
| Case 69 | X  | 2,700,157   | 2,802,368   | 0 | 0 | 0 | 0 |
| Case 69 | X  | 2,802,568   | 58,488,110  | 1 | 0 | 1 | 0 |
| Case 69 | X  | 61,694,576  | 154,898,561 | 1 | 0 | 1 | 0 |
| Case 70 | 1  | 82,154      | 93,274,450  | 3 | 2 | 5 | 0 |
| Case 70 | 1  | 93,289,668  | 121,346,616 | 2 | 2 | 4 | 0 |
| Case 70 | 1  | 142,649,718 | 249,218,992 | 3 | 2 | 5 | 0 |
| Case 70 | 2  | 18,674      | 92,081,640  | 3 | 2 | 5 | 0 |
| Case 70 | 2  | 95,429,424  | 186,164,824 | 3 | 2 | 5 | 0 |
| Case 70 | 2  | 186,165,639 | 186,556,464 | 2 | 2 | 4 | 0 |
| Case 70 | 2  | 186,577,266 | 222,423,389 | 3 | 2 | 5 | 0 |
| Case 70 | 2  | 222,424,544 | 222,721,065 | 2 | 2 | 4 | 0 |
| Case 70 | 2  | 222,729,505 | 243,048,760 | 3 | 2 | 5 | 0 |
| Case 70 | 3  | 61,495      | 58,163,901  | 2 | 2 | 4 | 0 |
| Case 70 | 3  | 58,165,233  | 58,819,748  | 3 | 2 | 5 | 0 |
| Case 70 | 3  | 58,823,639  | 90,442,925  | 2 | 2 | 4 | 0 |
| Case 70 | 3  | 93,537,290  | 197,838,262 | 3 | 2 | 5 | 0 |
| Case 70 | 4  | 71,566      | 49,620,898  | 2 | 2 | 4 | 0 |
| Case 70 | 4  | 52,697,856  | 190,963,766 | 2 | 2 | 4 | 0 |
| Case 70 | 5  | 38,139      | 30,839,331  | 2 | 2 | 4 | 0 |
| Case 70 | 5  | 30,839,387  | 30,963,876  | 3 | 2 | 5 | 0 |

|         |    |             |             |    |   |    |   |
|---------|----|-------------|-------------|----|---|----|---|
| Case 70 | 5  | 30,964,809  | 46,399,093  | 2  | 2 | 4  | 0 |
| Case 70 | 5  | 49,457,282  | 70,986,475  | 2  | 2 | 4  | 0 |
| Case 70 | 5  | 70,990,736  | 71,162,904  | 3  | 2 | 5  | 0 |
| Case 70 | 5  | 71,163,187  | 149,971,345 | 2  | 2 | 4  | 0 |
| Case 70 | 5  | 149,972,167 | 150,422,168 | 3  | 2 | 5  | 0 |
| Case 70 | 5  | 150,422,765 | 180,693,127 | 2  | 2 | 4  | 0 |
| Case 70 | 6  | 108,666     | 19,575,499  | 2  | 2 | 4  | 0 |
| Case 70 | 6  | 19,589,595  | 19,743,486  | 4  | 2 | 6  | 0 |
| Case 70 | 6  | 19,748,549  | 29,772,395  | 3  | 2 | 5  | 0 |
| Case 70 | 6  | 29,772,549  | 29,807,853  | 2  | 2 | 4  | 0 |
| Case 70 | 6  | 29,807,923  | 47,010,843  | 3  | 2 | 5  | 0 |
| Case 70 | 6  | 47,028,167  | 47,153,739  | 3  | 3 | 6  | 0 |
| Case 70 | 6  | 47,163,013  | 58,752,089  | 3  | 2 | 5  | 0 |
| Case 70 | 6  | 61,891,118  | 87,229,518  | 3  | 2 | 5  | 0 |
| Case 70 | 6  | 87,243,828  | 92,965,297  | 2  | 2 | 4  | 0 |
| Case 70 | 6  | 92,966,484  | 155,752,048 | 3  | 2 | 5  | 0 |
| Case 70 | 6  | 155,754,323 | 155,896,760 | 7  | 2 | 9  | 0 |
| Case 70 | 6  | 155,897,444 | 156,043,860 | 8  | 2 | 10 | 0 |
| Case 70 | 6  | 156,050,029 | 156,133,888 | 6  | 2 | 8  | 0 |
| Case 70 | 6  | 156,136,688 | 156,293,797 | 3  | 2 | 5  | 0 |
| Case 70 | 6  | 156,299,960 | 170,980,171 | 2  | 2 | 4  | 0 |
| Case 70 | 7  | 44,935      | 4,402,530   | 3  | 2 | 5  | 0 |
| Case 70 | 7  | 4,407,330   | 4,434,887   | 2  | 2 | 4  | 0 |
| Case 70 | 7  | 4,435,534   | 56,724,412  | 3  | 2 | 5  | 0 |
| Case 70 | 7  | 56,727,631  | 58,019,061  | 2  | 2 | 4  | 0 |
| Case 70 | 7  | 61,056,053  | 73,826,693  | 2  | 2 | 4  | 0 |
| Case 70 | 7  | 73,862,412  | 98,858,784  | 3  | 2 | 5  | 0 |
| Case 70 | 7  | 98,861,915  | 103,312,891 | 2  | 2 | 4  | 0 |
| Case 70 | 7  | 103,314,344 | 159,119,486 | 3  | 2 | 5  | 0 |
| Case 70 | 8  | 164,984     | 43,791,691  | 2  | 2 | 4  | 0 |
| Case 70 | 8  | 46,886,735  | 79,883,523  | 2  | 2 | 4  | 0 |
| Case 70 | 8  | 79,883,695  | 90,784,991  | 3  | 2 | 5  | 0 |
| Case 70 | 8  | 90,785,005  | 91,082,062  | 2  | 2 | 4  | 0 |
| Case 70 | 8  | 91,094,086  | 146,293,414 | 3  | 2 | 5  | 0 |
| Case 70 | 9  | 46,587      | 5,784,120   | 2  | 2 | 4  | 0 |
| Case 70 | 9  | 5,786,850   | 6,523,011   | 3  | 2 | 5  | 0 |
| Case 70 | 9  | 6,532,344   | 14,834,172  | 2  | 2 | 4  | 0 |
| Case 70 | 9  | 14,835,055  | 14,941,672  | 3  | 2 | 5  | 0 |
| Case 70 | 9  | 14,947,472  | 31,872,624  | 2  | 2 | 4  | 0 |
| Case 70 | 9  | 31,873,011  | 33,739,343  | 3  | 2 | 5  | 0 |
| Case 70 | 9  | 33,751,865  | 34,996,397  | 2  | 2 | 4  | 0 |
| Case 70 | 9  | 34,996,406  | 46,944,322  | 3  | 2 | 5  | 0 |
| Case 70 | 9  | 65,629,772  | 93,951,043  | 2  | 2 | 4  | 0 |
| Case 70 | 9  | 93,952,940  | 94,120,749  | 4  | 2 | 6  | 0 |
| Case 70 | 9  | 94,141,918  | 98,455,545  | 3  | 2 | 5  | 0 |
| Case 70 | 9  | 98,466,346  | 141,066,491 | 2  | 2 | 4  | 0 |
| Case 70 | 10 | 98,087      | 39,097,912  | 3  | 2 | 5  | 0 |
| Case 70 | 10 | 42,436,301  | 113,902,418 | 3  | 2 | 5  | 0 |
| Case 70 | 10 | 113,903,510 | 114,969,063 | 2  | 2 | 4  | 0 |
| Case 70 | 10 | 114,980,405 | 135,477,883 | 3  | 2 | 5  | 0 |
| Case 70 | 11 | 193,146     | 50,325,741  | 3  | 2 | 5  | 0 |
| Case 70 | 11 | 50,332,064  | 51,591,253  | 2  | 2 | 4  | 0 |
| Case 70 | 11 | 54,794,237  | 55,084,568  | 2  | 2 | 4  | 0 |
| Case 70 | 11 | 55,091,268  | 111,629,743 | 3  | 2 | 5  | 0 |
| Case 70 | 11 | 111,631,612 | 134,934,063 | 2  | 2 | 4  | 0 |
| Case 70 | 12 | 191,619     | 24,318,555  | 2  | 2 | 4  | 0 |
| Case 70 | 12 | 24,323,208  | 24,392,893  | 9  | 1 | 10 | 0 |
| Case 70 | 12 | 24,393,365  | 25,417,418  | 10 | 1 | 11 | 0 |
| Case 70 | 12 | 25,418,077  | 25,449,557  | 12 | 1 | 13 | 0 |
| Case 70 | 12 | 25,454,578  | 25,913,789  | 10 | 1 | 11 | 0 |
| Case 70 | 12 | 25,917,408  | 26,217,934  | 7  | 1 | 8  | 0 |

|         |    |             |             |   |   |   |   |
|---------|----|-------------|-------------|---|---|---|---|
| Case 70 | 12 | 26,217,950  | 31,786,745  | 4 | 2 | 6 | 0 |
| Case 70 | 12 | 31,795,208  | 32,178,900  | 3 | 2 | 5 | 0 |
| Case 70 | 12 | 32,187,284  | 34,853,011  | 4 | 2 | 6 | 0 |
| Case 70 | 12 | 37,876,400  | 133,810,935 | 3 | 2 | 5 | 0 |
| Case 70 | 13 | 19,058,717  | 115,103,529 | 2 | 2 | 4 | 0 |
| Case 70 | 14 | 19,280,733  | 20,404,736  | 2 | 2 | 4 | 0 |
| Case 70 | 14 | 20,416,499  | 22,625,374  | 3 | 2 | 5 | 0 |
| Case 70 | 14 | 22,631,217  | 22,964,782  | 3 | 3 | 6 | 0 |
| Case 70 | 14 | 22,966,662  | 107,287,663 | 3 | 2 | 5 | 0 |
| Case 70 | 15 | 20,034,919  | 55,339,088  | 2 | 2 | 4 | 0 |
| Case 70 | 15 | 55,342,353  | 56,387,226  | 3 | 2 | 5 | 0 |
| Case 70 | 15 | 56,387,931  | 59,199,937  | 2 | 2 | 4 | 0 |
| Case 70 | 15 | 59,205,253  | 102,461,162 | 3 | 2 | 5 | 0 |
| Case 70 | 16 | 88,165      | 3,510,737   | 2 | 2 | 4 | 0 |
| Case 70 | 16 | 3,522,303   | 35,285,582  | 3 | 2 | 5 | 0 |
| Case 70 | 16 | 46,450,037  | 53,100,690  | 3 | 2 | 5 | 0 |
| Case 70 | 16 | 53,114,256  | 54,114,529  | 2 | 2 | 4 | 0 |
| Case 70 | 16 | 54,114,824  | 70,818,759  | 3 | 2 | 5 | 0 |
| Case 70 | 16 | 70,819,670  | 78,305,461  | 2 | 2 | 4 | 0 |
| Case 70 | 16 | 78,308,940  | 90,274,695  | 3 | 2 | 5 | 0 |
| Case 70 | 17 | 11,885      | 22,242,355  | 2 | 2 | 4 | 0 |
| Case 70 | 17 | 25,268,142  | 25,268,142  | 2 | 2 | 4 | 0 |
| Case 70 | 17 | 25,295,032  | 81,060,040  | 3 | 2 | 5 | 0 |
| Case 70 | 18 | 87,505      | 15,375,878  | 3 | 2 | 5 | 0 |
| Case 70 | 18 | 18,520,354  | 26,455,757  | 3 | 2 | 5 | 0 |
| Case 70 | 18 | 26,481,132  | 78,015,180  | 2 | 2 | 4 | 0 |
| Case 70 | 19 | 260,912     | 9,541,833   | 2 | 2 | 4 | 0 |
| Case 70 | 19 | 9,546,329   | 11,828,410  | 3 | 2 | 5 | 0 |
| Case 70 | 19 | 11,832,283  | 12,942,750  | 2 | 2 | 4 | 0 |
| Case 70 | 19 | 12,942,798  | 19,612,826  | 3 | 2 | 5 | 0 |
| Case 70 | 19 | 19,613,284  | 19,909,052  | 2 | 2 | 4 | 0 |
| Case 70 | 19 | 19,939,387  | 23,392,478  | 3 | 2 | 5 | 0 |
| Case 70 | 19 | 23,395,317  | 24,629,285  | 2 | 2 | 4 | 0 |
| Case 70 | 19 | 27,732,159  | 27,801,814  | 2 | 2 | 4 | 0 |
| Case 70 | 19 | 27,828,664  | 29,525,811  | 3 | 2 | 5 | 0 |
| Case 70 | 19 | 29,526,586  | 30,861,683  | 4 | 2 | 6 | 0 |
| Case 70 | 19 | 30,877,813  | 37,643,212  | 3 | 2 | 5 | 0 |
| Case 70 | 19 | 37,643,239  | 37,907,792  | 4 | 2 | 6 | 0 |
| Case 70 | 19 | 37,909,470  | 59,097,160  | 3 | 2 | 5 | 0 |
| Case 70 | 20 | 63,244      | 14,723,009  | 3 | 2 | 5 | 0 |
| Case 70 | 20 | 14,724,600  | 15,143,185  | 2 | 2 | 4 | 0 |
| Case 70 | 20 | 15,143,806  | 26,293,985  | 3 | 2 | 5 | 0 |
| Case 70 | 20 | 29,425,357  | 62,948,788  | 3 | 2 | 5 | 0 |
| Case 70 | 21 | 10,827,533  | 10,971,337  | 3 | 2 | 5 | 0 |
| Case 70 | 21 | 14,368,320  | 36,193,871  | 3 | 2 | 5 | 0 |
| Case 70 | 21 | 36,202,482  | 36,274,176  | 2 | 2 | 4 | 0 |
| Case 70 | 21 | 36,274,619  | 36,851,619  | 4 | 2 | 6 | 0 |
| Case 70 | 21 | 36,853,517  | 41,725,503  | 3 | 2 | 5 | 0 |
| Case 70 | 21 | 41,725,625  | 44,506,201  | 2 | 2 | 4 | 0 |
| Case 70 | 21 | 44,508,020  | 44,875,560  | 3 | 2 | 5 | 0 |
| Case 70 | 21 | 44,876,072  | 48,100,155  | 2 | 2 | 4 | 0 |
| Case 70 | 22 | 16,114,244  | 51,195,728  | 2 | 2 | 4 | 0 |
| Case 70 | X  | 2,700,157   | 58,488,110  | 2 | 1 | 3 | 0 |
| Case 70 | X  | 61,694,576  | 154,898,561 | 2 | 1 | 3 | 0 |
| Case 71 | 1  | 82,154      | 121,346,616 | 1 | 1 | 2 | 0 |
| Case 71 | 1  | 142,649,718 | 249,218,992 | 1 | 1 | 2 | 0 |
| Case 71 | 2  | 18,674      | 92,081,640  | 1 | 1 | 2 | 0 |
| Case 71 | 2  | 95,429,424  | 243,048,760 | 1 | 1 | 2 | 0 |
| Case 71 | 3  | 61,495      | 90,442,925  | 1 | 1 | 2 | 0 |
| Case 71 | 3  | 93,537,290  | 197,838,262 | 1 | 1 | 2 | 0 |
| Case 71 | 4  | 71,566      | 49,620,898  | 1 | 1 | 2 | 0 |

|         |    |             |             |   |   |   |   |
|---------|----|-------------|-------------|---|---|---|---|
| Case 71 | 4  | 52,697,856  | 190,963,766 | 1 | 1 | 2 | 0 |
| Case 71 | 5  | 38,139      | 46,399,093  | 1 | 1 | 2 | 0 |
| Case 71 | 5  | 49,457,282  | 180,693,127 | 1 | 1 | 2 | 0 |
| Case 71 | 6  | 108,666     | 58,752,089  | 1 | 1 | 2 | 0 |
| Case 71 | 6  | 61,891,118  | 170,980,171 | 1 | 1 | 2 | 0 |
| Case 71 | 7  | 44,935      | 58,019,061  | 1 | 1 | 2 | 0 |
| Case 71 | 7  | 61,056,053  | 159,119,486 | 1 | 1 | 2 | 0 |
| Case 71 | 8  | 164,984     | 43,791,691  | 1 | 1 | 2 | 0 |
| Case 71 | 8  | 46,886,735  | 135,026,160 | 1 | 1 | 2 | 0 |
| Case 71 | 8  | 135,026,266 | 135,064,801 | 0 | 0 | 0 | 0 |
| Case 71 | 8  | 135,065,947 | 146,293,414 | 1 | 1 | 2 | 0 |
| Case 71 | 9  | 46,587      | 46,944,322  | 1 | 1 | 2 | 0 |
| Case 71 | 9  | 65,629,772  | 141,066,491 | 1 | 1 | 2 | 0 |
| Case 71 | 10 | 98,087      | 39,097,912  | 1 | 1 | 2 | 0 |
| Case 71 | 10 | 42,436,301  | 135,477,883 | 1 | 1 | 2 | 0 |
| Case 71 | 11 | 193,146     | 51,591,253  | 1 | 1 | 2 | 0 |
| Case 71 | 11 | 54,794,237  | 134,934,063 | 1 | 1 | 2 | 0 |
| Case 71 | 12 | 191,619     | 34,853,011  | 1 | 1 | 2 | 0 |
| Case 71 | 12 | 37,876,400  | 133,810,935 | 1 | 1 | 2 | 0 |
| Case 71 | 13 | 19,058,717  | 115,103,529 | 1 | 1 | 2 | 0 |
| Case 71 | 14 | 19,280,733  | 107,287,663 | 1 | 1 | 2 | 0 |
| Case 71 | 15 | 20,034,919  | 102,461,162 | 1 | 1 | 2 | 0 |
| Case 71 | 16 | 88,165      | 35,285,582  | 1 | 1 | 2 | 0 |
| Case 71 | 16 | 46,450,037  | 90,274,695  | 1 | 1 | 2 | 0 |
| Case 71 | 17 | 11,885      | 22,242,355  | 1 | 1 | 2 | 0 |
| Case 71 | 17 | 25,268,142  | 81,060,040  | 1 | 1 | 2 | 0 |
| Case 71 | 18 | 87,505      | 15,375,878  | 1 | 1 | 2 | 0 |
| Case 71 | 18 | 18,520,354  | 78,015,180  | 1 | 1 | 2 | 0 |
| Case 71 | 19 | 260,912     | 24,629,285  | 1 | 1 | 2 | 0 |
| Case 71 | 19 | 27,732,159  | 59,097,160  | 1 | 1 | 2 | 0 |
| Case 71 | 20 | 63,244      | 26,293,985  | 1 | 1 | 2 | 0 |
| Case 71 | 20 | 29,425,357  | 62,948,788  | 1 | 1 | 2 | 0 |
| Case 71 | 21 | 10,827,533  | 10,971,337  | 1 | 1 | 2 | 0 |
| Case 71 | 21 | 14,368,320  | 48,100,155  | 1 | 1 | 2 | 0 |
| Case 71 | 22 | 16,114,244  | 51,195,728  | 1 | 1 | 2 | 0 |
| Case 71 | X  | 2,700,157   | 58,488,110  | 1 | 1 | 2 | 0 |
| Case 71 | X  | 61,694,576  | 154,898,561 | 1 | 1 | 2 | 0 |
| Case 73 | 1  | 82,154      | 17,864,514  | 3 | 0 | 3 | 1 |
| Case 73 | 1  | 17,869,179  | 84,485,716  | 4 | 0 | 4 | 1 |
| Case 73 | 1  | 84,492,217  | 85,816,136  | 6 | 0 | 6 | 1 |
| Case 73 | 1  | 85,828,840  | 121,346,616 | 4 | 0 | 4 | 1 |
| Case 73 | 1  | 142,649,718 | 151,279,855 | 6 | 1 | 7 | 0 |
| Case 73 | 1  | 151,280,995 | 155,408,686 | 5 | 1 | 6 | 0 |
| Case 73 | 1  | 155,412,037 | 155,628,219 | 5 | 2 | 7 | 0 |
| Case 73 | 1  | 155,629,930 | 156,237,971 | 4 | 2 | 6 | 0 |
| Case 73 | 1  | 156,238,593 | 171,077,372 | 5 | 2 | 7 | 0 |
| Case 73 | 1  | 171,077,782 | 174,489,170 | 6 | 2 | 8 | 0 |
| Case 73 | 1  | 174,496,267 | 176,422,273 | 6 | 0 | 6 | 1 |
| Case 73 | 1  | 176,422,595 | 178,160,268 | 7 | 0 | 7 | 1 |
| Case 73 | 1  | 178,163,090 | 193,661,626 | 6 | 0 | 6 | 1 |
| Case 73 | 1  | 193,667,535 | 217,235,542 | 5 | 0 | 5 | 1 |
| Case 73 | 1  | 217,236,801 | 217,365,587 | 2 | 0 | 2 | 1 |
| Case 73 | 1  | 217,365,991 | 240,565,868 | 5 | 0 | 5 | 1 |
| Case 73 | 1  | 240,567,903 | 241,823,862 | 6 | 0 | 6 | 1 |
| Case 73 | 1  | 241,823,909 | 245,575,250 | 5 | 0 | 5 | 1 |
| Case 73 | 1  | 245,575,879 | 249,218,992 | 4 | 0 | 4 | 1 |
| Case 73 | 2  | 18,674      | 13,070,276  | 6 | 2 | 8 | 0 |
| Case 73 | 2  | 13,070,917  | 13,911,161  | 7 | 2 | 9 | 0 |
| Case 73 | 2  | 13,913,190  | 27,003,021  | 6 | 2 | 8 | 0 |
| Case 73 | 2  | 27,008,442  | 44,021,624  | 5 | 2 | 7 | 0 |
| Case 73 | 2  | 44,021,676  | 44,212,008  | 5 | 0 | 5 | 1 |

|         |   |             |             |   |   |    |   |
|---------|---|-------------|-------------|---|---|----|---|
| Case 73 | 2 | 44,218,637  | 47,272,245  | 5 | 2 | 7  | 0 |
| Case 73 | 2 | 47,273,468  | 49,857,938  | 6 | 4 | 10 | 0 |
| Case 73 | 2 | 49,858,261  | 53,989,984  | 7 | 4 | 11 | 0 |
| Case 73 | 2 | 53,991,707  | 69,523,838  | 5 | 2 | 7  | 0 |
| Case 73 | 2 | 69,527,166  | 70,789,532  | 6 | 2 | 8  | 0 |
| Case 73 | 2 | 70,796,257  | 77,234,767  | 5 | 2 | 7  | 0 |
| Case 73 | 2 | 77,235,219  | 78,048,788  | 7 | 5 | 12 | 0 |
| Case 73 | 2 | 78,061,074  | 92,081,640  | 5 | 2 | 7  | 0 |
| Case 73 | 2 | 95,429,424  | 115,922,821 | 5 | 2 | 7  | 0 |
| Case 73 | 2 | 115,932,634 | 122,777,669 | 5 | 1 | 6  | 0 |
| Case 73 | 2 | 122,797,678 | 124,144,379 | 3 | 2 | 5  | 0 |
| Case 73 | 2 | 124,144,870 | 128,046,416 | 4 | 1 | 5  | 0 |
| Case 73 | 2 | 128,047,041 | 130,208,064 | 4 | 0 | 4  | 1 |
| Case 73 | 2 | 130,216,043 | 137,795,717 | 4 | 1 | 5  | 0 |
| Case 73 | 2 | 137,799,664 | 154,984,566 | 3 | 1 | 4  | 0 |
| Case 73 | 2 | 154,994,668 | 165,383,526 | 5 | 1 | 6  | 0 |
| Case 73 | 2 | 165,394,580 | 165,581,707 | 1 | 0 | 1  | 0 |
| Case 73 | 2 | 165,584,049 | 167,885,599 | 5 | 1 | 6  | 0 |
| Case 73 | 2 | 167,904,042 | 215,748,105 | 5 | 0 | 5  | 1 |
| Case 73 | 2 | 215,752,084 | 243,048,760 | 7 | 0 | 7  | 1 |
| Case 73 | 3 | 61,495      | 3,031,308   | 1 | 0 | 1  | 0 |
| Case 73 | 3 | 3,033,626   | 4,276,680   | 2 | 0 | 2  | 1 |
| Case 73 | 3 | 4,282,950   | 23,226,298  | 4 | 1 | 5  | 0 |
| Case 73 | 3 | 23,234,618  | 23,521,204  | 3 | 1 | 4  | 0 |
| Case 73 | 3 | 23,522,785  | 36,466,050  | 4 | 1 | 5  | 0 |
| Case 73 | 3 | 36,470,307  | 37,600,470  | 6 | 1 | 7  | 0 |
| Case 73 | 3 | 37,603,526  | 41,205,419  | 4 | 1 | 5  | 0 |
| Case 73 | 3 | 41,205,708  | 53,077,372  | 3 | 1 | 4  | 0 |
| Case 73 | 3 | 53,084,326  | 60,531,242  | 4 | 1 | 5  | 0 |
| Case 73 | 3 | 60,536,420  | 60,874,077  | 4 | 0 | 4  | 1 |
| Case 73 | 3 | 60,876,648  | 62,544,685  | 4 | 1 | 5  | 0 |
| Case 73 | 3 | 62,548,081  | 62,565,383  | 1 | 0 | 1  | 0 |
| Case 73 | 3 | 62,568,321  | 65,361,897  | 4 | 1 | 5  | 0 |
| Case 73 | 3 | 65,362,393  | 73,241,653  | 5 | 1 | 6  | 0 |
| Case 73 | 3 | 73,242,344  | 80,450,254  | 5 | 2 | 7  | 0 |
| Case 73 | 3 | 80,456,863  | 90,442,925  | 3 | 2 | 5  | 0 |
| Case 73 | 3 | 93,537,290  | 93,646,209  | 3 | 2 | 5  | 0 |
| Case 73 | 3 | 93,650,604  | 102,871,451 | 3 | 3 | 6  | 0 |
| Case 73 | 3 | 102,872,264 | 106,419,208 | 6 | 3 | 9  | 0 |
| Case 73 | 3 | 106,420,030 | 106,594,233 | 9 | 3 | 12 | 0 |
| Case 73 | 3 | 106,595,370 | 107,489,708 | 7 | 3 | 10 | 0 |
| Case 73 | 3 | 107,489,754 | 112,033,979 | 3 | 3 | 6  | 0 |
| Case 73 | 3 | 112,043,158 | 114,221,822 | 4 | 3 | 7  | 0 |
| Case 73 | 3 | 114,233,596 | 161,657,384 | 3 | 3 | 6  | 0 |
| Case 73 | 3 | 161,662,483 | 161,913,102 | 4 | 3 | 7  | 0 |
| Case 73 | 3 | 161,913,373 | 171,048,165 | 3 | 3 | 6  | 0 |
| Case 73 | 3 | 171,049,177 | 171,092,504 | 3 | 2 | 5  | 0 |
| Case 73 | 3 | 171,093,738 | 174,540,381 | 3 | 3 | 6  | 0 |
| Case 73 | 3 | 174,563,022 | 174,659,289 | 3 | 2 | 5  | 0 |
| Case 73 | 3 | 174,667,446 | 191,708,375 | 3 | 3 | 6  | 0 |
| Case 73 | 3 | 191,711,064 | 197,403,806 | 3 | 2 | 5  | 0 |
| Case 73 | 3 | 197,403,844 | 197,838,262 | 4 | 2 | 6  | 0 |
| Case 73 | 4 | 71,566      | 3,496,150   | 5 | 0 | 5  | 1 |
| Case 73 | 4 | 3,496,940   | 49,620,898  | 6 | 0 | 6  | 1 |
| Case 73 | 4 | 52,697,856  | 85,858,329  | 6 | 0 | 6  | 1 |
| Case 73 | 4 | 85,859,997  | 91,515,710  | 3 | 0 | 3  | 1 |
| Case 73 | 4 | 91,516,040  | 93,710,269  | 2 | 0 | 2  | 1 |
| Case 73 | 4 | 93,723,466  | 130,839,795 | 4 | 0 | 4  | 1 |
| Case 73 | 4 | 130,849,076 | 138,395,782 | 3 | 0 | 3  | 1 |
| Case 73 | 4 | 138,397,770 | 169,020,566 | 4 | 0 | 4  | 1 |
| Case 73 | 4 | 169,032,268 | 190,963,766 | 3 | 0 | 3  | 1 |



|         |   |             |             |    |   |    |   |
|---------|---|-------------|-------------|----|---|----|---|
| Case 73 | 5 | 38,139      | 9,359,420   | 3  | 0 | 3  | 1 |
| Case 73 | 5 | 9,362,804   | 34,190,149  | 5  | 0 | 5  | 1 |
| Case 73 | 5 | 34,266,171  | 36,049,454  | 5  | 3 | 8  | 0 |
| Case 73 | 5 | 36,050,048  | 37,361,728  | 5  | 5 | 10 | 0 |
| Case 73 | 5 | 37,364,475  | 42,388,894  | 4  | 4 | 8  | 0 |
| Case 73 | 5 | 42,390,038  | 46,399,093  | 5  | 3 | 8  | 0 |
| Case 73 | 5 | 49,457,282  | 49,522,346  | 5  | 3 | 8  | 0 |
| Case 73 | 5 | 49,564,798  | 55,706,081  | 4  | 0 | 4  | 1 |
| Case 73 | 5 | 55,711,291  | 58,334,645  | 3  | 0 | 3  | 1 |
| Case 73 | 5 | 58,334,922  | 58,704,650  | 2  | 0 | 2  | 1 |
| Case 73 | 5 | 58,707,111  | 60,754,419  | 3  | 0 | 3  | 1 |
| Case 73 | 5 | 60,759,515  | 70,967,633  | 4  | 0 | 4  | 1 |
| Case 73 | 5 | 70,974,096  | 71,471,713  | 5  | 0 | 5  | 1 |
| Case 73 | 5 | 71,472,020  | 75,048,465  | 4  | 0 | 4  | 1 |
| Case 73 | 5 | 75,097,385  | 81,849,746  | 3  | 0 | 3  | 1 |
| Case 73 | 5 | 81,849,888  | 163,988,372 | 4  | 0 | 4  | 1 |
| Case 73 | 5 | 163,992,315 | 174,892,501 | 5  | 0 | 5  | 1 |
| Case 73 | 5 | 174,893,280 | 178,270,810 | 4  | 0 | 4  | 1 |
| Case 73 | 5 | 178,274,144 | 180,693,127 | 5  | 0 | 5  | 1 |
| Case 73 | 6 | 108,666     | 2,223,002   | 5  | 2 | 7  | 0 |
| Case 73 | 6 | 2,230,252   | 2,765,899   | 4  | 4 | 8  | 0 |
| Case 73 | 6 | 2,766,560   | 10,990,028  | 5  | 2 | 7  | 0 |
| Case 73 | 6 | 10,990,493  | 11,912,213  | 6  | 2 | 8  | 0 |
| Case 73 | 6 | 11,913,828  | 20,486,506  | 5  | 2 | 7  | 0 |
| Case 73 | 6 | 20,486,920  | 20,630,397  | 3  | 2 | 5  | 0 |
| Case 73 | 6 | 20,631,011  | 23,440,413  | 5  | 2 | 7  | 0 |
| Case 73 | 6 | 23,441,842  | 32,664,960  | 3  | 2 | 5  | 0 |
| Case 73 | 6 | 32,665,420  | 32,685,685  | 2  | 2 | 4  | 0 |
| Case 73 | 6 | 32,685,865  | 38,400,139  | 3  | 2 | 5  | 0 |
| Case 73 | 6 | 38,415,481  | 57,246,925  | 5  | 2 | 7  | 0 |
| Case 73 | 6 | 57,255,152  | 58,150,777  | 4  | 2 | 6  | 0 |
| Case 73 | 6 | 58,168,152  | 58,752,089  | 5  | 2 | 7  | 0 |
| Case 73 | 6 | 61,891,118  | 62,865,650  | 3  | 2 | 5  | 0 |
| Case 73 | 6 | 62,865,692  | 67,322,556  | 4  | 2 | 6  | 0 |
| Case 73 | 6 | 67,325,681  | 68,731,635  | 2  | 0 | 2  | 1 |
| Case 73 | 6 | 68,738,618  | 82,149,482  | 3  | 0 | 3  | 1 |
| Case 73 | 6 | 82,159,696  | 88,669,274  | 5  | 0 | 5  | 1 |
| Case 73 | 6 | 88,671,201  | 90,005,925  | 3  | 0 | 3  | 1 |
| Case 73 | 6 | 90,006,421  | 93,920,448  | 5  | 0 | 5  | 1 |
| Case 73 | 6 | 93,921,556  | 109,867,197 | 3  | 0 | 3  | 1 |
| Case 73 | 6 | 109,868,340 | 120,489,270 | 4  | 0 | 4  | 1 |
| Case 73 | 6 | 120,491,715 | 122,708,203 | 2  | 0 | 2  | 1 |
| Case 73 | 6 | 122,709,054 | 133,195,740 | 4  | 0 | 4  | 1 |
| Case 73 | 6 | 133,207,105 | 134,948,543 | 4  | 2 | 6  | 0 |
| Case 73 | 6 | 134,969,201 | 138,156,425 | 5  | 2 | 7  | 0 |
| Case 73 | 6 | 138,157,037 | 139,518,546 | 4  | 2 | 6  | 0 |
| Case 73 | 6 | 139,540,103 | 140,584,384 | 4  | 3 | 7  | 0 |
| Case 73 | 6 | 140,614,699 | 141,596,752 | 5  | 2 | 7  | 0 |
| Case 73 | 6 | 141,602,679 | 142,921,498 | 6  | 2 | 8  | 0 |
| Case 73 | 6 | 142,922,061 | 145,168,058 | 5  | 2 | 7  | 0 |
| Case 73 | 6 | 145,168,455 | 152,697,940 | 6  | 2 | 8  | 0 |
| Case 73 | 6 | 152,697,966 | 161,984,377 | 5  | 2 | 7  | 0 |
| Case 73 | 6 | 161,987,050 | 163,284,038 | 4  | 2 | 6  | 0 |
| Case 73 | 6 | 163,286,352 | 169,622,491 | 5  | 2 | 7  | 0 |
| Case 73 | 6 | 169,625,874 | 170,980,171 | 3  | 2 | 5  | 0 |
| Case 73 | 7 | 44,935      | 83,185      | 4  | 2 | 6  | 0 |
| Case 73 | 7 | 93,811      | 2,486,004   | 4  | 0 | 4  | 1 |
| Case 73 | 7 | 2,486,810   | 3,131,792   | 7  | 0 | 7  | 1 |
| Case 73 | 7 | 3,137,057   | 3,288,471   | 10 | 0 | 10 | 1 |
| Case 73 | 7 | 3,295,229   | 7,425,664   | 7  | 0 | 7  | 1 |
| Case 73 | 7 | 7,426,828   | 13,238,496  | 8  | 0 | 8  | 1 |

|         |   |             |             |    |   |    |   |
|---------|---|-------------|-------------|----|---|----|---|
| Case 73 | 7 | 13,248,712  | 13,303,290  | 5  | 0 | 5  | 1 |
| Case 73 | 7 | 13,305,542  | 19,363,844  | 8  | 0 | 8  | 1 |
| Case 73 | 7 | 19,368,402  | 27,456,500  | 6  | 0 | 6  | 1 |
| Case 73 | 7 | 27,461,889  | 43,243,719  | 7  | 0 | 7  | 1 |
| Case 73 | 7 | 43,248,626  | 46,386,613  | 6  | 0 | 6  | 1 |
| Case 73 | 7 | 46,387,679  | 58,019,061  | 7  | 0 | 7  | 1 |
| Case 73 | 7 | 61,056,053  | 61,994,170  | 7  | 0 | 7  | 1 |
| Case 73 | 7 | 62,035,570  | 66,908,992  | 6  | 0 | 6  | 1 |
| Case 73 | 7 | 66,924,597  | 68,508,054  | 7  | 0 | 7  | 1 |
| Case 73 | 7 | 68,508,645  | 71,439,807  | 5  | 0 | 5  | 1 |
| Case 73 | 7 | 71,443,057  | 78,407,722  | 5  | 1 | 6  | 0 |
| Case 73 | 7 | 78,416,056  | 86,019,034  | 6  | 0 | 6  | 1 |
| Case 73 | 7 | 86,036,570  | 95,473,956  | 5  | 3 | 8  | 0 |
| Case 73 | 7 | 95,484,290  | 96,240,932  | 6  | 0 | 6  | 1 |
| Case 73 | 7 | 96,254,519  | 102,782,393 | 4  | 0 | 4  | 1 |
| Case 73 | 7 | 102,789,495 | 121,680,999 | 5  | 0 | 5  | 1 |
| Case 73 | 7 | 121,681,023 | 122,400,546 | 6  | 0 | 6  | 1 |
| Case 73 | 7 | 122,401,546 | 147,533,267 | 5  | 0 | 5  | 1 |
| Case 73 | 7 | 147,534,006 | 159,119,486 | 4  | 0 | 4  | 1 |
| Case 73 | 8 | 164,984     | 507,994     | 0  | 0 | 0  | 0 |
| Case 73 | 8 | 516,479     | 2,290,039   | 1  | 0 | 1  | 0 |
| Case 73 | 8 | 2,292,024   | 3,520,871   | 0  | 0 | 0  | 0 |
| Case 73 | 8 | 3,520,923   | 43,791,691  | 5  | 0 | 5  | 1 |
| Case 73 | 8 | 46,886,735  | 46,942,842  | 5  | 0 | 5  | 1 |
| Case 73 | 8 | 46,944,913  | 49,987,801  | 5  | 3 | 8  | 0 |
| Case 73 | 8 | 49,988,587  | 51,983,412  | 5  | 4 | 9  | 0 |
| Case 73 | 8 | 51,988,578  | 62,279,368  | 4  | 4 | 8  | 0 |
| Case 73 | 8 | 62,289,749  | 62,930,548  | 5  | 4 | 9  | 0 |
| Case 73 | 8 | 62,940,286  | 70,180,251  | 4  | 4 | 8  | 0 |
| Case 73 | 8 | 70,186,364  | 72,852,760  | 5  | 4 | 9  | 0 |
| Case 73 | 8 | 72,855,904  | 75,145,770  | 6  | 3 | 9  | 0 |
| Case 73 | 8 | 75,154,867  | 83,687,961  | 5  | 4 | 9  | 0 |
| Case 73 | 8 | 83,690,134  | 85,383,821  | 7  | 4 | 11 | 0 |
| Case 73 | 8 | 85,396,742  | 90,074,006  | 5  | 4 | 9  | 0 |
| Case 73 | 8 | 90,074,757  | 90,520,649  | 5  | 2 | 7  | 0 |
| Case 73 | 8 | 90,528,845  | 91,301,466  | 5  | 4 | 9  | 0 |
| Case 73 | 8 | 91,301,523  | 96,864,355  | 4  | 4 | 8  | 0 |
| Case 73 | 8 | 96,870,639  | 105,065,091 | 8  | 3 | 11 | 0 |
| Case 73 | 8 | 105,078,342 | 105,211,090 | 12 | 4 | 16 | 0 |
| Case 73 | 8 | 105,216,321 | 105,957,540 | 8  | 3 | 11 | 0 |
| Case 73 | 8 | 105,958,020 | 107,411,992 | 9  | 3 | 12 | 0 |
| Case 73 | 8 | 107,413,542 | 117,394,185 | 7  | 3 | 10 | 0 |
| Case 73 | 8 | 117,410,485 | 123,965,260 | 6  | 4 | 10 | 0 |
| Case 73 | 8 | 123,965,276 | 126,781,758 | 7  | 2 | 9  | 0 |
| Case 73 | 8 | 126,789,340 | 130,248,593 | 6  | 4 | 10 | 0 |
| Case 73 | 8 | 130,249,805 | 131,778,235 | 7  | 2 | 9  | 0 |
| Case 73 | 8 | 131,778,538 | 133,313,335 | 6  | 4 | 10 | 0 |
| Case 73 | 8 | 133,317,111 | 146,293,414 | 6  | 3 | 9  | 0 |
| Case 73 | 9 | 46,587      | 9,440,925   | 3  | 0 | 3  | 1 |
| Case 73 | 9 | 9,441,003   | 9,526,811   | 0  | 0 | 0  | 0 |
| Case 73 | 9 | 9,530,755   | 12,738,690  | 2  | 0 | 2  | 1 |
| Case 73 | 9 | 12,748,633  | 23,665,940  | 3  | 0 | 3  | 1 |
| Case 73 | 9 | 23,668,205  | 23,892,846  | 6  | 2 | 8  | 0 |
| Case 73 | 9 | 23,897,432  | 25,336,447  | 3  | 3 | 6  | 0 |
| Case 73 | 9 | 25,352,201  | 27,561,628  | 2  | 2 | 4  | 0 |
| Case 73 | 9 | 27,561,800  | 28,007,239  | 3  | 2 | 5  | 0 |
| Case 73 | 9 | 28,011,383  | 30,753,828  | 2  | 2 | 4  | 0 |
| Case 73 | 9 | 30,753,998  | 31,101,278  | 5  | 2 | 7  | 0 |
| Case 73 | 9 | 31,102,874  | 33,641,436  | 2  | 2 | 4  | 0 |
| Case 73 | 9 | 33,643,569  | 35,952,224  | 3  | 2 | 5  | 0 |
| Case 73 | 9 | 35,953,318  | 46,944,322  | 2  | 2 | 4  | 0 |

|         |    |             |             |   |   |   |   |
|---------|----|-------------|-------------|---|---|---|---|
| Case 73 | 9  | 65,629,772  | 74,940,364  | 4 | 1 | 5 | 0 |
| Case 73 | 9  | 74,944,437  | 88,661,486  | 3 | 1 | 4 | 0 |
| Case 73 | 9  | 88,669,475  | 89,230,779  | 4 | 1 | 5 | 0 |
| Case 73 | 9  | 89,236,894  | 101,026,356 | 3 | 1 | 4 | 0 |
| Case 73 | 9  | 101,034,477 | 102,407,049 | 3 | 2 | 5 | 0 |
| Case 73 | 9  | 102,426,699 | 102,866,870 | 4 | 2 | 6 | 0 |
| Case 73 | 9  | 102,868,769 | 116,416,163 | 3 | 2 | 5 | 0 |
| Case 73 | 9  | 116,418,881 | 124,135,334 | 4 | 0 | 4 | 1 |
| Case 73 | 9  | 124,160,616 | 129,617,253 | 5 | 0 | 5 | 1 |
| Case 73 | 9  | 129,619,875 | 141,066,491 | 4 | 0 | 4 | 1 |
| Case 73 | 10 | 98,087      | 2,372,763   | 7 | 0 | 7 | 1 |
| Case 73 | 10 | 2,373,295   | 6,345,351   | 5 | 0 | 5 | 1 |
| Case 73 | 10 | 6,350,590   | 6,391,061   | 8 | 0 | 8 | 1 |
| Case 73 | 10 | 6,392,683   | 29,378,926  | 5 | 0 | 5 | 1 |
| Case 73 | 10 | 29,379,116  | 29,466,058  | 7 | 0 | 7 | 1 |
| Case 73 | 10 | 29,466,492  | 39,097,912  | 5 | 0 | 5 | 1 |
| Case 73 | 10 | 42,436,301  | 44,104,513  | 6 | 0 | 6 | 1 |
| Case 73 | 10 | 44,105,044  | 47,662,471  | 5 | 0 | 5 | 1 |
| Case 73 | 10 | 47,662,831  | 52,617,538  | 4 | 0 | 4 | 1 |
| Case 73 | 10 | 52,623,433  | 61,050,653  | 1 | 0 | 1 | 0 |
| Case 73 | 10 | 61,057,736  | 84,416,129  | 5 | 0 | 5 | 1 |
| Case 73 | 10 | 84,423,164  | 92,362,797  | 1 | 0 | 1 | 0 |
| Case 73 | 10 | 92,371,952  | 109,285,928 | 6 | 0 | 6 | 1 |
| Case 73 | 10 | 109,289,596 | 110,641,035 | 9 | 0 | 9 | 1 |
| Case 73 | 10 | 110,642,737 | 116,566,550 | 8 | 0 | 8 | 1 |
| Case 73 | 10 | 116,571,796 | 117,713,221 | 9 | 0 | 9 | 1 |
| Case 73 | 10 | 117,720,208 | 127,542,753 | 8 | 0 | 8 | 1 |
| Case 73 | 10 | 127,548,215 | 130,123,291 | 4 | 0 | 4 | 1 |
| Case 73 | 10 | 130,128,297 | 135,477,883 | 2 | 0 | 2 | 1 |
| Case 73 | 11 | 193,146     | 2,047,640   | 5 | 0 | 5 | 1 |
| Case 73 | 11 | 2,048,488   | 2,261,338   | 7 | 0 | 7 | 1 |
| Case 73 | 11 | 2,281,501   | 5,221,698   | 5 | 0 | 5 | 1 |
| Case 73 | 11 | 5,221,699   | 16,221,683  | 5 | 2 | 7 | 0 |
| Case 73 | 11 | 16,225,741  | 16,266,740  | 6 | 3 | 9 | 0 |
| Case 73 | 11 | 16,274,295  | 20,809,264  | 5 | 2 | 7 | 0 |
| Case 73 | 11 | 20,822,918  | 20,910,614  | 2 | 0 | 2 | 1 |
| Case 73 | 11 | 20,915,524  | 33,559,186  | 4 | 2 | 6 | 0 |
| Case 73 | 11 | 33,563,598  | 33,705,172  | 5 | 0 | 5 | 1 |
| Case 73 | 11 | 33,706,353  | 47,436,707  | 4 | 2 | 6 | 0 |
| Case 73 | 11 | 47,441,513  | 51,160,828  | 4 | 3 | 7 | 0 |
| Case 73 | 11 | 51,205,162  | 51,591,253  | 5 | 0 | 5 | 1 |
| Case 73 | 11 | 54,794,237  | 56,342,048  | 5 | 0 | 5 | 1 |
| Case 73 | 11 | 56,343,114  | 67,011,765  | 4 | 3 | 7 | 0 |
| Case 73 | 11 | 67,017,968  | 76,345,406  | 4 | 2 | 6 | 0 |
| Case 73 | 11 | 76,347,032  | 134,934,063 | 3 | 2 | 5 | 0 |
| Case 73 | 12 | 191,619     | 9,144,906   | 5 | 3 | 8 | 0 |
| Case 73 | 12 | 9,147,759   | 16,486,288  | 4 | 3 | 7 | 0 |
| Case 73 | 12 | 16,492,515  | 17,672,830  | 4 | 4 | 8 | 0 |
| Case 73 | 12 | 17,674,687  | 19,649,096  | 4 | 3 | 7 | 0 |
| Case 73 | 12 | 19,657,013  | 19,955,152  | 4 | 2 | 6 | 0 |
| Case 73 | 12 | 19,955,649  | 20,122,534  | 4 | 3 | 7 | 0 |
| Case 73 | 12 | 20,124,137  | 20,165,273  | 3 | 1 | 4 | 0 |
| Case 73 | 12 | 20,179,218  | 26,475,967  | 4 | 3 | 7 | 0 |
| Case 73 | 12 | 26,485,544  | 26,523,923  | 5 | 3 | 8 | 0 |
| Case 73 | 12 | 26,526,005  | 31,997,981  | 4 | 3 | 7 | 0 |
| Case 73 | 12 | 32,001,515  | 34,145,569  | 5 | 3 | 8 | 0 |
| Case 73 | 12 | 34,149,433  | 34,853,011  | 4 | 3 | 7 | 0 |
| Case 73 | 12 | 37,876,400  | 38,327,649  | 4 | 3 | 7 | 0 |
| Case 73 | 12 | 38,347,638  | 43,579,008  | 4 | 2 | 6 | 0 |
| Case 73 | 12 | 43,581,323  | 44,113,010  | 5 | 2 | 7 | 0 |
| Case 73 | 12 | 44,123,795  | 57,116,661  | 4 | 2 | 6 | 0 |

|         |    |             |             |   |   |    |   |
|---------|----|-------------|-------------|---|---|----|---|
| Case 73 | 12 | 57,116,834  | 58,403,744  | 5 | 2 | 7  | 0 |
| Case 73 | 12 | 58,417,789  | 59,121,881  | 6 | 4 | 10 | 0 |
| Case 73 | 12 | 59,124,921  | 61,596,597  | 4 | 4 | 8  | 0 |
| Case 73 | 12 | 61,604,963  | 61,791,636  | 4 | 2 | 6  | 0 |
| Case 73 | 12 | 61,796,935  | 66,182,455  | 4 | 4 | 8  | 0 |
| Case 73 | 12 | 66,186,486  | 109,539,785 | 5 | 0 | 5  | 1 |
| Case 73 | 12 | 109,540,689 | 114,083,833 | 6 | 0 | 6  | 1 |
| Case 73 | 12 | 114,085,798 | 117,865,061 | 7 | 0 | 7  | 1 |
| Case 73 | 12 | 117,870,842 | 123,915,089 | 6 | 0 | 6  | 1 |
| Case 73 | 12 | 123,919,969 | 133,810,935 | 5 | 0 | 5  | 1 |
| Case 73 | 13 | 19,058,717  | 20,358,616  | 3 | 2 | 5  | 0 |
| Case 73 | 13 | 20,382,882  | 21,473,952  | 4 | 1 | 5  | 0 |
| Case 73 | 13 | 21,483,113  | 22,271,565  | 3 | 2 | 5  | 0 |
| Case 73 | 13 | 22,274,442  | 23,234,909  | 6 | 2 | 8  | 0 |
| Case 73 | 13 | 23,244,935  | 46,866,122  | 6 | 1 | 7  | 0 |
| Case 73 | 13 | 46,881,671  | 49,495,712  | 5 | 1 | 6  | 0 |
| Case 73 | 13 | 49,497,994  | 69,282,388  | 5 | 0 | 5  | 1 |
| Case 73 | 13 | 69,285,592  | 71,437,599  | 6 | 0 | 6  | 1 |
| Case 73 | 13 | 71,439,474  | 71,731,904  | 7 | 0 | 7  | 1 |
| Case 73 | 13 | 71,741,392  | 78,037,785  | 4 | 0 | 4  | 1 |
| Case 73 | 13 | 78,042,890  | 94,889,631  | 6 | 0 | 6  | 1 |
| Case 73 | 13 | 94,895,346  | 100,352,798 | 5 | 0 | 5  | 1 |
| Case 73 | 13 | 100,358,796 | 111,153,479 | 6 | 0 | 6  | 1 |
| Case 73 | 13 | 111,154,061 | 115,103,529 | 5 | 0 | 5  | 1 |
| Case 73 | 14 | 19,280,733  | 20,539,305  | 5 | 0 | 5  | 1 |
| Case 73 | 14 | 20,549,093  | 21,620,695  | 7 | 0 | 7  | 1 |
| Case 73 | 14 | 21,623,118  | 22,427,444  | 6 | 0 | 6  | 1 |
| Case 73 | 14 | 22,428,984  | 23,128,339  | 7 | 0 | 7  | 1 |
| Case 73 | 14 | 23,129,207  | 31,526,395  | 5 | 0 | 5  | 1 |
| Case 73 | 14 | 31,531,855  | 41,577,085  | 4 | 0 | 4  | 1 |
| Case 73 | 14 | 41,579,517  | 42,397,496  | 7 | 0 | 7  | 1 |
| Case 73 | 14 | 42,407,596  | 44,844,572  | 4 | 0 | 4  | 1 |
| Case 73 | 14 | 44,861,644  | 66,460,887  | 6 | 0 | 6  | 1 |
| Case 73 | 14 | 66,461,978  | 81,321,794  | 5 | 0 | 5  | 1 |
| Case 73 | 14 | 81,329,130  | 81,778,644  | 7 | 0 | 7  | 1 |
| Case 73 | 14 | 81,786,278  | 97,859,392  | 5 | 0 | 5  | 1 |
| Case 73 | 14 | 97,864,860  | 107,182,839 | 4 | 0 | 4  | 1 |
| Case 73 | 14 | 107,185,809 | 107,287,663 | 6 | 0 | 6  | 1 |
| Case 73 | 15 | 20,034,919  | 31,321,875  | 2 | 0 | 2  | 1 |
| Case 73 | 15 | 31,322,565  | 43,365,760  | 4 | 0 | 4  | 1 |
| Case 73 | 15 | 43,382,887  | 43,991,180  | 5 | 0 | 5  | 1 |
| Case 73 | 15 | 44,016,417  | 49,397,812  | 4 | 4 | 8  | 0 |
| Case 73 | 15 | 49,414,418  | 49,601,425  | 3 | 2 | 5  | 0 |
| Case 73 | 15 | 49,611,845  | 53,206,136  | 4 | 4 | 8  | 0 |
| Case 73 | 15 | 53,209,322  | 53,493,565  | 6 | 4 | 10 | 0 |
| Case 73 | 15 | 53,494,101  | 55,787,253  | 5 | 4 | 9  | 0 |
| Case 73 | 15 | 55,789,910  | 62,733,241  | 4 | 2 | 6  | 0 |
| Case 73 | 15 | 62,735,529  | 65,209,705  | 4 | 1 | 5  | 0 |
| Case 73 | 15 | 65,209,880  | 67,021,608  | 4 | 2 | 6  | 0 |
| Case 73 | 15 | 67,021,996  | 72,252,498  | 6 | 2 | 8  | 0 |
| Case 73 | 15 | 72,266,174  | 72,500,965  | 6 | 1 | 7  | 0 |
| Case 73 | 15 | 72,502,138  | 75,271,128  | 5 | 2 | 7  | 0 |
| Case 73 | 15 | 75,305,040  | 92,672,853  | 5 | 3 | 8  | 0 |
| Case 73 | 15 | 92,677,444  | 93,808,595  | 5 | 4 | 9  | 0 |
| Case 73 | 15 | 93,810,409  | 98,912,579  | 6 | 3 | 9  | 0 |
| Case 73 | 15 | 98,913,205  | 102,461,162 | 5 | 3 | 8  | 0 |
| Case 73 | 16 | 88,165      | 5,275,559   | 2 | 2 | 4  | 0 |
| Case 73 | 16 | 5,276,231   | 35,285,582  | 3 | 2 | 5  | 0 |
| Case 73 | 16 | 46,450,037  | 49,219,484  | 3 | 1 | 4  | 0 |
| Case 73 | 16 | 49,230,672  | 56,198,338  | 3 | 0 | 3  | 1 |
| Case 73 | 16 | 56,223,892  | 56,699,967  | 3 | 1 | 4  | 0 |

|         |    |            |            |   |   |   |   |
|---------|----|------------|------------|---|---|---|---|
| Case 73 | 16 | 56,701,283 | 58,230,665 | 3 | 2 | 5 | 0 |
| Case 73 | 16 | 58,245,244 | 60,631,838 | 3 | 1 | 4 | 0 |
| Case 73 | 16 | 60,646,103 | 61,312,371 | 3 | 2 | 5 | 0 |
| Case 73 | 16 | 61,317,091 | 61,668,912 | 3 | 1 | 4 | 0 |
| Case 73 | 16 | 61,674,103 | 61,823,318 | 1 | 0 | 1 | 0 |
| Case 73 | 16 | 61,842,332 | 62,145,127 | 2 | 1 | 3 | 0 |
| Case 73 | 16 | 62,148,013 | 63,498,153 | 3 | 2 | 5 | 0 |
| Case 73 | 16 | 63,518,506 | 64,620,001 | 2 | 1 | 3 | 0 |
| Case 73 | 16 | 64,636,137 | 68,591,230 | 3 | 2 | 5 | 0 |
| Case 73 | 16 | 68,591,615 | 68,840,588 | 2 | 1 | 3 | 0 |
| Case 73 | 16 | 68,842,734 | 71,877,966 | 3 | 2 | 5 | 0 |
| Case 73 | 16 | 71,884,209 | 72,990,553 | 3 | 0 | 3 | 1 |
| Case 73 | 16 | 72,991,286 | 73,235,680 | 4 | 0 | 4 | 1 |
| Case 73 | 16 | 73,248,477 | 78,087,730 | 3 | 0 | 3 | 1 |
| Case 73 | 16 | 78,092,178 | 80,237,726 | 1 | 0 | 1 | 0 |
| Case 73 | 16 | 80,240,329 | 80,924,900 | 2 | 0 | 2 | 1 |
| Case 73 | 16 | 80,925,781 | 82,834,027 | 3 | 0 | 3 | 1 |
| Case 73 | 16 | 82,835,886 | 84,929,341 | 2 | 0 | 2 | 1 |
| Case 73 | 16 | 84,934,018 | 87,908,401 | 3 | 0 | 3 | 1 |
| Case 73 | 16 | 87,911,909 | 89,715,813 | 4 | 0 | 4 | 1 |
| Case 73 | 16 | 89,715,851 | 90,274,695 | 1 | 0 | 1 | 0 |
| Case 73 | 17 | 11,885     | 9,804,724  | 5 | 0 | 5 | 1 |
| Case 73 | 17 | 9,806,807  | 10,200,348 | 6 | 0 | 6 | 1 |
| Case 73 | 17 | 10,200,522 | 21,318,826 | 5 | 0 | 5 | 1 |
| Case 73 | 17 | 21,318,995 | 22,242,355 | 4 | 1 | 5 | 0 |
| Case 73 | 17 | 25,268,142 | 25,268,142 | 4 | 1 | 5 | 0 |
| Case 73 | 17 | 25,295,032 | 28,877,845 | 4 | 2 | 6 | 0 |
| Case 73 | 17 | 28,878,817 | 36,991,576 | 3 | 0 | 3 | 1 |
| Case 73 | 17 | 36,996,181 | 40,577,580 | 5 | 0 | 5 | 1 |
| Case 73 | 17 | 40,582,296 | 44,868,187 | 6 | 0 | 6 | 1 |
| Case 73 | 17 | 44,869,063 | 54,778,620 | 7 | 0 | 7 | 1 |
| Case 73 | 17 | 54,778,817 | 60,882,097 | 6 | 0 | 6 | 1 |
| Case 73 | 17 | 60,882,789 | 65,105,649 | 4 | 0 | 4 | 1 |
| Case 73 | 17 | 65,108,042 | 67,721,149 | 4 | 3 | 7 | 0 |
| Case 73 | 17 | 67,754,386 | 69,074,425 | 4 | 0 | 4 | 1 |
| Case 73 | 17 | 69,074,779 | 70,047,725 | 5 | 0 | 5 | 1 |
| Case 73 | 17 | 70,051,535 | 70,522,932 | 6 | 0 | 6 | 1 |
| Case 73 | 17 | 70,533,218 | 81,060,040 | 5 | 0 | 5 | 1 |
| Case 73 | 18 | 87,505     | 15,375,878 | 5 | 0 | 5 | 1 |
| Case 73 | 18 | 18,520,354 | 41,552,391 | 5 | 0 | 5 | 1 |
| Case 73 | 18 | 41,557,562 | 42,606,091 | 5 | 1 | 6 | 0 |
| Case 73 | 18 | 42,606,738 | 43,183,018 | 5 | 0 | 5 | 1 |
| Case 73 | 18 | 43,183,449 | 44,062,611 | 5 | 1 | 6 | 0 |
| Case 73 | 18 | 44,063,598 | 45,555,783 | 5 | 0 | 5 | 1 |
| Case 73 | 18 | 45,557,951 | 49,968,398 | 6 | 0 | 6 | 1 |
| Case 73 | 18 | 49,969,561 | 50,815,036 | 6 | 1 | 7 | 0 |
| Case 73 | 18 | 50,822,084 | 74,838,659 | 6 | 0 | 6 | 1 |
| Case 73 | 18 | 74,842,207 | 76,693,565 | 6 | 1 | 7 | 0 |
| Case 73 | 18 | 76,700,509 | 78,015,180 | 5 | 1 | 6 | 0 |
| Case 73 | 19 | 260,912    | 582,505    | 4 | 0 | 4 | 1 |
| Case 73 | 19 | 582,775    | 1,914,795  | 3 | 0 | 3 | 1 |
| Case 73 | 19 | 1,916,392  | 18,624,964 | 4 | 0 | 4 | 1 |
| Case 73 | 19 | 18,637,610 | 24,452,317 | 3 | 3 | 6 | 0 |
| Case 73 | 19 | 24,457,120 | 24,629,285 | 4 | 2 | 6 | 0 |
| Case 73 | 19 | 27,732,159 | 28,178,423 | 4 | 2 | 6 | 0 |
| Case 73 | 19 | 28,185,193 | 28,466,280 | 4 | 3 | 7 | 0 |
| Case 73 | 19 | 28,468,556 | 31,889,413 | 3 | 3 | 6 | 0 |
| Case 73 | 19 | 31,893,698 | 38,028,484 | 4 | 2 | 6 | 0 |
| Case 73 | 19 | 38,030,003 | 38,709,609 | 3 | 2 | 5 | 0 |
| Case 73 | 19 | 38,713,568 | 42,477,310 | 2 | 2 | 4 | 0 |
| Case 73 | 19 | 42,488,938 | 54,888,703 | 3 | 2 | 5 | 0 |

|         |    |             |             |    |   |    |   |
|---------|----|-------------|-------------|----|---|----|---|
| Case 73 | 19 | 54,891,185  | 54,974,460  | 5  | 2 | 7  | 0 |
| Case 73 | 19 | 54,981,997  | 59,097,160  | 3  | 2 | 5  | 0 |
| Case 73 | 20 | 63,244      | 3,231,134   | 5  | 2 | 7  | 0 |
| Case 73 | 20 | 3,232,099   | 7,683,869   | 4  | 2 | 6  | 0 |
| Case 73 | 20 | 7,684,688   | 8,615,480   | 6  | 4 | 10 | 0 |
| Case 73 | 20 | 8,616,588   | 9,662,006   | 8  | 3 | 11 | 0 |
| Case 73 | 20 | 9,663,068   | 15,447,711  | 7  | 3 | 10 | 0 |
| Case 73 | 20 | 15,450,279  | 16,054,623  | 7  | 2 | 9  | 0 |
| Case 73 | 20 | 16,055,272  | 17,007,410  | 6  | 3 | 9  | 0 |
| Case 73 | 20 | 17,008,922  | 18,680,688  | 4  | 4 | 8  | 0 |
| Case 73 | 20 | 18,716,729  | 22,485,322  | 5  | 3 | 8  | 0 |
| Case 73 | 20 | 22,487,988  | 22,729,973  | 6  | 3 | 9  | 0 |
| Case 73 | 20 | 22,732,148  | 25,871,801  | 5  | 3 | 8  | 0 |
| Case 73 | 20 | 25,922,993  | 26,293,985  | 6  | 2 | 8  | 0 |
| Case 73 | 20 | 29,425,357  | 34,064,340  | 6  | 2 | 8  | 0 |
| Case 73 | 20 | 34,064,383  | 34,848,116  | 13 | 1 | 14 | 0 |
| Case 73 | 20 | 34,849,290  | 52,063,311  | 6  | 2 | 8  | 0 |
| Case 73 | 20 | 52,067,793  | 52,304,108  | 13 | 1 | 14 | 0 |
| Case 73 | 20 | 52,309,657  | 53,283,735  | 9  | 2 | 11 | 0 |
| Case 73 | 20 | 53,285,374  | 54,467,126  | 8  | 2 | 10 | 0 |
| Case 73 | 20 | 54,468,058  | 58,399,419  | 7  | 2 | 9  | 0 |
| Case 73 | 20 | 58,405,220  | 59,449,366  | 10 | 2 | 12 | 0 |
| Case 73 | 20 | 59,449,464  | 62,948,788  | 8  | 1 | 9  | 0 |
| Case 73 | 21 | 10,827,533  | 10,971,337  | 2  | 0 | 2  | 1 |
| Case 73 | 21 | 14,368,320  | 23,264,430  | 2  | 0 | 2  | 1 |
| Case 73 | 21 | 23,266,183  | 25,288,139  | 2  | 2 | 4  | 0 |
| Case 73 | 21 | 25,293,908  | 31,730,357  | 3  | 0 | 3  | 1 |
| Case 73 | 21 | 31,733,121  | 35,819,063  | 3  | 1 | 4  | 0 |
| Case 73 | 21 | 35,820,324  | 36,865,734  | 3  | 2 | 5  | 0 |
| Case 73 | 21 | 36,873,163  | 38,999,590  | 3  | 1 | 4  | 0 |
| Case 73 | 21 | 39,001,613  | 48,100,155  | 3  | 2 | 5  | 0 |
| Case 73 | 22 | 16,114,244  | 17,432,482  | 2  | 1 | 3  | 0 |
| Case 73 | 22 | 17,433,888  | 17,747,195  | 3  | 2 | 5  | 0 |
| Case 73 | 22 | 17,758,677  | 18,640,503  | 5  | 2 | 7  | 0 |
| Case 73 | 22 | 18,640,527  | 26,019,540  | 5  | 0 | 5  | 1 |
| Case 73 | 22 | 26,022,728  | 26,902,388  | 7  | 0 | 7  | 1 |
| Case 73 | 22 | 26,902,835  | 33,402,604  | 6  | 0 | 6  | 1 |
| Case 73 | 22 | 33,402,843  | 33,637,087  | 9  | 0 | 9  | 1 |
| Case 73 | 22 | 33,646,994  | 36,480,881  | 6  | 0 | 6  | 1 |
| Case 73 | 22 | 36,490,485  | 48,552,163  | 5  | 0 | 5  | 1 |
| Case 73 | 22 | 48,560,111  | 48,909,082  | 6  | 0 | 6  | 1 |
| Case 73 | 22 | 48,911,602  | 50,117,191  | 5  | 0 | 5  | 1 |
| Case 73 | 22 | 50,118,723  | 51,195,728  | 4  | 0 | 4  | 1 |
| Case 73 | X  | 2,700,157   | 58,488,110  | 2  | 0 | 2  | 1 |
| Case 73 | X  | 61,694,576  | 91,270,056  | 2  | 0 | 2  | 1 |
| Case 73 | X  | 91,301,486  | 93,531,443  | 0  | 0 | 0  | 0 |
| Case 73 | X  | 93,550,271  | 154,898,561 | 2  | 1 | 3  | 0 |
| Case 74 | 1  | 82,154      | 20,387,608  | 3  | 0 | 3  | 1 |
| Case 74 | 1  | 20,390,322  | 34,282,691  | 2  | 0 | 2  | 1 |
| Case 74 | 1  | 34,283,024  | 54,700,707  | 3  | 0 | 3  | 1 |
| Case 74 | 1  | 54,702,869  | 55,048,190  | 4  | 0 | 4  | 1 |
| Case 74 | 1  | 55,049,806  | 57,645,301  | 3  | 0 | 3  | 1 |
| Case 74 | 1  | 57,646,661  | 57,744,259  | 4  | 0 | 4  | 1 |
| Case 74 | 1  | 57,749,426  | 73,173,906  | 3  | 0 | 3  | 1 |
| Case 74 | 1  | 73,184,090  | 75,159,349  | 4  | 0 | 4  | 1 |
| Case 74 | 1  | 75,160,724  | 91,919,533  | 2  | 0 | 2  | 1 |
| Case 74 | 1  | 91,919,610  | 92,416,821  | 3  | 0 | 3  | 1 |
| Case 74 | 1  | 92,425,621  | 94,510,248  | 2  | 0 | 2  | 1 |
| Case 74 | 1  | 94,510,253  | 94,637,058  | 3  | 0 | 3  | 1 |
| Case 74 | 1  | 94,638,711  | 121,346,616 | 2  | 0 | 2  | 1 |
| Case 74 | 1  | 142,649,718 | 146,803,630 | 4  | 0 | 4  | 1 |

|         |   |             |             |   |   |   |   |
|---------|---|-------------|-------------|---|---|---|---|
| Case 74 | 1 | 146,813,358 | 146,946,857 | 5 | 0 | 5 | 1 |
| Case 74 | 1 | 146,949,222 | 161,831,507 | 4 | 0 | 4 | 1 |
| Case 74 | 1 | 161,856,424 | 161,941,219 | 5 | 0 | 5 | 1 |
| Case 74 | 1 | 161,943,634 | 180,063,445 | 4 | 0 | 4 | 1 |
| Case 74 | 1 | 180,064,742 | 192,883,411 | 3 | 0 | 3 | 1 |
| Case 74 | 1 | 192,886,814 | 193,503,684 | 2 | 0 | 2 | 1 |
| Case 74 | 1 | 193,510,827 | 249,218,992 | 3 | 0 | 3 | 1 |
| Case 74 | 2 | 18,674      | 6,500,529   | 2 | 1 | 3 | 0 |
| Case 74 | 2 | 6,502,497   | 6,533,549   | 3 | 1 | 4 | 0 |
| Case 74 | 2 | 6,536,892   | 33,623,566  | 2 | 1 | 3 | 0 |
| Case 74 | 2 | 33,623,720  | 34,578,706  | 3 | 1 | 4 | 0 |
| Case 74 | 2 | 34,580,853  | 43,312,809  | 2 | 1 | 3 | 0 |
| Case 74 | 2 | 43,314,116  | 43,466,619  | 3 | 1 | 4 | 0 |
| Case 74 | 2 | 43,483,044  | 75,940,599  | 2 | 1 | 3 | 0 |
| Case 74 | 2 | 75,940,864  | 76,386,381  | 2 | 2 | 4 | 0 |
| Case 74 | 2 | 76,387,187  | 77,078,101  | 2 | 1 | 3 | 0 |
| Case 74 | 2 | 77,082,852  | 77,772,143  | 2 | 0 | 2 | 1 |
| Case 74 | 2 | 77,774,970  | 88,383,996  | 2 | 1 | 3 | 0 |
| Case 74 | 2 | 88,384,084  | 92,081,640  | 3 | 1 | 4 | 0 |
| Case 74 | 2 | 95,429,424  | 95,429,424  | 3 | 1 | 4 | 0 |
| Case 74 | 2 | 95,439,005  | 187,103,445 | 3 | 0 | 3 | 1 |
| Case 74 | 2 | 187,150,058 | 187,344,191 | 4 | 0 | 4 | 1 |
| Case 74 | 2 | 187,349,063 | 213,347,104 | 3 | 0 | 3 | 1 |
| Case 74 | 2 | 213,351,973 | 216,429,439 | 2 | 0 | 2 | 1 |
| Case 74 | 2 | 216,436,519 | 219,211,369 | 3 | 0 | 3 | 1 |
| Case 74 | 2 | 219,221,846 | 234,726,058 | 2 | 0 | 2 | 1 |
| Case 74 | 2 | 234,726,080 | 234,738,523 | 1 | 0 | 1 | 0 |
| Case 74 | 2 | 234,739,340 | 243,048,760 | 2 | 0 | 2 | 1 |
| Case 74 | 3 | 61,495      | 3,248,073   | 1 | 0 | 1 | 0 |
| Case 74 | 3 | 3,248,990   | 3,478,365   | 2 | 0 | 2 | 1 |
| Case 74 | 3 | 3,494,748   | 3,569,967   | 0 | 0 | 0 | 0 |
| Case 74 | 3 | 3,572,242   | 8,316,110   | 1 | 0 | 1 | 0 |
| Case 74 | 3 | 8,319,151   | 9,871,038   | 2 | 0 | 2 | 1 |
| Case 74 | 3 | 9,874,914   | 11,920,880  | 1 | 0 | 1 | 0 |
| Case 74 | 3 | 11,931,002  | 19,040,447  | 2 | 0 | 2 | 1 |
| Case 74 | 3 | 19,041,089  | 32,702,348  | 3 | 0 | 3 | 1 |
| Case 74 | 3 | 32,704,457  | 33,530,636  | 4 | 0 | 4 | 1 |
| Case 74 | 3 | 33,531,800  | 44,134,579  | 3 | 0 | 3 | 1 |
| Case 74 | 3 | 44,135,356  | 60,333,449  | 2 | 0 | 2 | 1 |
| Case 74 | 3 | 60,337,651  | 60,479,380  | 1 | 0 | 1 | 0 |
| Case 74 | 3 | 60,481,459  | 61,101,760  | 2 | 0 | 2 | 1 |
| Case 74 | 3 | 61,103,609  | 61,729,301  | 3 | 0 | 3 | 1 |
| Case 74 | 3 | 61,734,539  | 77,196,171  | 2 | 0 | 2 | 1 |
| Case 74 | 3 | 77,197,856  | 77,385,970  | 1 | 0 | 1 | 0 |
| Case 74 | 3 | 77,386,855  | 84,063,290  | 2 | 0 | 2 | 1 |
| Case 74 | 3 | 84,072,534  | 84,747,008  | 3 | 0 | 3 | 1 |
| Case 74 | 3 | 84,767,271  | 86,511,758  | 2 | 0 | 2 | 1 |
| Case 74 | 3 | 86,526,422  | 88,328,826  | 2 | 2 | 4 | 0 |
| Case 74 | 3 | 88,334,311  | 90,442,925  | 2 | 1 | 3 | 0 |
| Case 74 | 3 | 93,537,290  | 95,392,545  | 2 | 1 | 3 | 0 |
| Case 74 | 3 | 95,427,920  | 98,416,900  | 3 | 1 | 4 | 0 |
| Case 74 | 3 | 98,432,559  | 109,265,353 | 2 | 1 | 3 | 0 |
| Case 74 | 3 | 109,270,100 | 109,793,785 | 3 | 1 | 4 | 0 |
| Case 74 | 3 | 109,799,304 | 110,271,671 | 4 | 1 | 5 | 0 |
| Case 74 | 3 | 110,271,975 | 111,189,285 | 3 | 1 | 4 | 0 |
| Case 74 | 3 | 111,193,516 | 111,427,455 | 2 | 1 | 3 | 0 |
| Case 74 | 3 | 111,432,752 | 111,481,775 | 3 | 1 | 4 | 0 |
| Case 74 | 3 | 111,482,048 | 112,033,979 | 2 | 1 | 3 | 0 |
| Case 74 | 3 | 112,043,158 | 112,486,737 | 3 | 1 | 4 | 0 |
| Case 74 | 3 | 112,496,539 | 113,737,567 | 2 | 1 | 3 | 0 |
| Case 74 | 3 | 113,737,568 | 121,705,842 | 2 | 2 | 4 | 0 |

|         |   |             |             |   |   |   |   |
|---------|---|-------------|-------------|---|---|---|---|
| Case 74 | 3 | 121,706,021 | 122,617,445 | 3 | 2 | 5 | 0 |
| Case 74 | 3 | 122,617,881 | 123,477,167 | 2 | 2 | 4 | 0 |
| Case 74 | 3 | 123,480,074 | 126,862,321 | 3 | 2 | 5 | 0 |
| Case 74 | 3 | 126,863,808 | 127,298,941 | 2 | 2 | 4 | 0 |
| Case 74 | 3 | 127,304,957 | 127,911,077 | 3 | 1 | 4 | 0 |
| Case 74 | 3 | 127,929,120 | 141,606,244 | 2 | 1 | 3 | 0 |
| Case 74 | 3 | 141,610,807 | 141,933,649 | 1 | 1 | 2 | 0 |
| Case 74 | 3 | 141,937,953 | 145,300,490 | 2 | 1 | 3 | 0 |
| Case 74 | 3 | 145,312,260 | 145,572,381 | 3 | 1 | 4 | 0 |
| Case 74 | 3 | 145,581,255 | 155,991,348 | 2 | 1 | 3 | 0 |
| Case 74 | 3 | 156,004,954 | 156,098,920 | 3 | 1 | 4 | 0 |
| Case 74 | 3 | 156,105,173 | 157,289,766 | 2 | 1 | 3 | 0 |
| Case 74 | 3 | 157,290,908 | 157,537,988 | 2 | 2 | 4 | 0 |
| Case 74 | 3 | 157,538,373 | 160,499,192 | 2 | 1 | 3 | 0 |
| Case 74 | 3 | 160,519,718 | 168,496,750 | 2 | 2 | 4 | 0 |
| Case 74 | 3 | 168,520,843 | 168,698,220 | 3 | 2 | 5 | 0 |
| Case 74 | 3 | 168,715,048 | 169,171,699 | 2 | 2 | 4 | 0 |
| Case 74 | 3 | 169,171,735 | 170,275,098 | 3 | 2 | 5 | 0 |
| Case 74 | 3 | 170,275,580 | 176,822,676 | 2 | 2 | 4 | 0 |
| Case 74 | 3 | 176,824,755 | 177,014,231 | 3 | 2 | 5 | 0 |
| Case 74 | 3 | 177,038,879 | 177,282,809 | 2 | 2 | 4 | 0 |
| Case 74 | 3 | 177,286,946 | 177,338,280 | 2 | 1 | 3 | 0 |
| Case 74 | 3 | 177,346,796 | 188,305,629 | 2 | 2 | 4 | 0 |
| Case 74 | 3 | 188,315,629 | 188,732,960 | 3 | 2 | 5 | 0 |
| Case 74 | 3 | 188,741,418 | 189,379,493 | 2 | 2 | 4 | 0 |
| Case 74 | 3 | 189,383,183 | 190,752,382 | 3 | 2 | 5 | 0 |
| Case 74 | 3 | 190,758,181 | 191,267,342 | 2 | 2 | 4 | 0 |
| Case 74 | 3 | 191,268,184 | 193,018,778 | 3 | 2 | 5 | 0 |
| Case 74 | 3 | 193,019,038 | 197,838,262 | 2 | 2 | 4 | 0 |
| Case 74 | 4 | 71,566      | 12,258,122  | 2 | 0 | 2 | 1 |
| Case 74 | 4 | 12,262,020  | 12,454,605  | 1 | 0 | 1 | 0 |
| Case 74 | 4 | 12,470,500  | 12,972,256  | 2 | 0 | 2 | 1 |
| Case 74 | 4 | 12,993,951  | 13,080,633  | 1 | 0 | 1 | 0 |
| Case 74 | 4 | 13,081,396  | 15,758,931  | 2 | 0 | 2 | 1 |
| Case 74 | 4 | 15,767,752  | 16,035,101  | 5 | 0 | 5 | 1 |
| Case 74 | 4 | 16,035,996  | 18,752,731  | 2 | 0 | 2 | 1 |
| Case 74 | 4 | 18,752,760  | 18,960,220  | 3 | 0 | 3 | 1 |
| Case 74 | 4 | 18,961,510  | 33,217,636  | 2 | 0 | 2 | 1 |
| Case 74 | 4 | 33,225,232  | 34,841,364  | 3 | 0 | 3 | 1 |
| Case 74 | 4 | 34,846,207  | 49,620,898  | 2 | 0 | 2 | 1 |
| Case 74 | 4 | 52,697,856  | 53,893,156  | 2 | 0 | 2 | 1 |
| Case 74 | 4 | 53,907,444  | 54,801,549  | 4 | 2 | 6 | 0 |
| Case 74 | 4 | 54,801,934  | 67,906,156  | 3 | 2 | 5 | 0 |
| Case 74 | 4 | 67,910,084  | 73,295,961  | 2 | 2 | 4 | 0 |
| Case 74 | 4 | 73,328,204  | 74,521,045  | 4 | 2 | 6 | 0 |
| Case 74 | 4 | 74,525,356  | 74,628,455  | 4 | 3 | 7 | 0 |
| Case 74 | 4 | 74,657,255  | 77,626,887  | 4 | 2 | 6 | 0 |
| Case 74 | 4 | 77,634,028  | 78,216,136  | 3 | 2 | 5 | 0 |
| Case 74 | 4 | 78,227,999  | 78,983,383  | 2 | 0 | 2 | 1 |
| Case 74 | 4 | 78,984,082  | 79,528,957  | 3 | 0 | 3 | 1 |
| Case 74 | 4 | 79,529,206  | 90,126,898  | 2 | 0 | 2 | 1 |
| Case 74 | 4 | 90,126,909  | 91,000,334  | 1 | 0 | 1 | 0 |
| Case 74 | 4 | 91,025,850  | 92,662,425  | 2 | 1 | 3 | 0 |
| Case 74 | 4 | 92,666,216  | 93,152,870  | 0 | 0 | 0 | 0 |
| Case 74 | 4 | 93,161,851  | 93,458,820  | 1 | 0 | 1 | 0 |
| Case 74 | 4 | 93,467,486  | 136,993,300 | 2 | 1 | 3 | 0 |
| Case 74 | 4 | 137,003,101 | 137,105,336 | 1 | 0 | 1 | 0 |
| Case 74 | 4 | 137,115,636 | 154,066,319 | 4 | 1 | 5 | 0 |
| Case 74 | 4 | 154,075,881 | 161,785,031 | 1 | 0 | 1 | 0 |
| Case 74 | 4 | 161,785,599 | 177,391,167 | 4 | 1 | 5 | 0 |
| Case 74 | 4 | 177,394,679 | 177,610,884 | 3 | 1 | 4 | 0 |



|         |   |             |             |   |   |   |   |
|---------|---|-------------|-------------|---|---|---|---|
| Case 74 | 4 | 177,611,211 | 180,257,370 | 4 | 1 | 5 | 0 |
| Case 74 | 4 | 180,263,649 | 186,357,523 | 2 | 1 | 3 | 0 |
| Case 74 | 4 | 186,365,998 | 188,250,769 | 4 | 1 | 5 | 0 |
| Case 74 | 4 | 188,258,978 | 188,597,930 | 3 | 1 | 4 | 0 |
| Case 74 | 4 | 188,608,123 | 190,963,766 | 4 | 1 | 5 | 0 |
| Case 74 | 5 | 38,139      | 18,268,789  | 2 | 1 | 3 | 0 |
| Case 74 | 5 | 18,272,737  | 22,119,976  | 1 | 1 | 2 | 0 |
| Case 74 | 5 | 22,156,155  | 22,458,871  | 1 | 0 | 1 | 0 |
| Case 74 | 5 | 22,472,039  | 32,029,638  | 1 | 1 | 2 | 0 |
| Case 74 | 5 | 32,031,477  | 34,871,161  | 2 | 1 | 3 | 0 |
| Case 74 | 5 | 34,878,150  | 46,399,093  | 1 | 1 | 2 | 0 |
| Case 74 | 5 | 49,457,282  | 49,810,613  | 1 | 1 | 2 | 0 |
| Case 74 | 5 | 49,827,072  | 49,988,020  | 2 | 1 | 3 | 0 |
| Case 74 | 5 | 49,991,561  | 60,065,519  | 1 | 1 | 2 | 0 |
| Case 74 | 5 | 60,074,000  | 60,329,624  | 0 | 0 | 0 | 0 |
| Case 74 | 5 | 60,336,004  | 61,456,769  | 2 | 1 | 3 | 0 |
| Case 74 | 5 | 61,461,609  | 73,712,303  | 1 | 1 | 2 | 0 |
| Case 74 | 5 | 73,713,209  | 74,021,509  | 2 | 1 | 3 | 0 |
| Case 74 | 5 | 74,021,793  | 82,422,643  | 1 | 1 | 2 | 0 |
| Case 74 | 5 | 82,436,811  | 82,632,729  | 1 | 0 | 1 | 0 |
| Case 74 | 5 | 82,633,951  | 86,507,043  | 1 | 1 | 2 | 0 |
| Case 74 | 5 | 86,518,243  | 89,517,833  | 2 | 1 | 3 | 0 |
| Case 74 | 5 | 89,518,433  | 90,464,235  | 3 | 1 | 4 | 0 |
| Case 74 | 5 | 90,466,296  | 103,912,623 | 2 | 1 | 3 | 0 |
| Case 74 | 5 | 103,914,523 | 104,235,042 | 1 | 1 | 2 | 0 |
| Case 74 | 5 | 104,239,861 | 118,624,190 | 2 | 1 | 3 | 0 |
| Case 74 | 5 | 118,624,941 | 118,835,058 | 3 | 1 | 4 | 0 |
| Case 74 | 5 | 118,835,097 | 145,131,986 | 2 | 1 | 3 | 0 |
| Case 74 | 5 | 145,132,758 | 175,575,898 | 2 | 2 | 4 | 0 |
| Case 74 | 5 | 175,579,201 | 180,693,127 | 2 | 1 | 3 | 0 |
| Case 74 | 6 | 108,666     | 887,977     | 2 | 1 | 3 | 0 |
| Case 74 | 6 | 888,109     | 1,264,403   | 3 | 1 | 4 | 0 |
| Case 74 | 6 | 1,270,046   | 41,469,071  | 2 | 1 | 3 | 0 |
| Case 74 | 6 | 41,474,727  | 45,011,305  | 2 | 2 | 4 | 0 |
| Case 74 | 6 | 45,038,760  | 58,752,089  | 2 | 1 | 3 | 0 |
| Case 74 | 6 | 61,891,118  | 96,621,271  | 2 | 1 | 3 | 0 |
| Case 74 | 6 | 96,622,433  | 96,850,379  | 3 | 1 | 4 | 0 |
| Case 74 | 6 | 96,853,579  | 125,550,328 | 2 | 1 | 3 | 0 |
| Case 74 | 6 | 125,551,895 | 125,587,961 | 3 | 2 | 5 | 0 |
| Case 74 | 6 | 125,596,957 | 126,210,390 | 2 | 1 | 3 | 0 |
| Case 74 | 6 | 126,210,395 | 126,307,962 | 2 | 2 | 4 | 0 |
| Case 74 | 6 | 126,317,137 | 170,980,171 | 2 | 1 | 3 | 0 |
| Case 74 | 7 | 44,935      | 4,659,324   | 2 | 2 | 4 | 0 |
| Case 74 | 7 | 4,665,570   | 4,780,514   | 2 | 1 | 3 | 0 |
| Case 74 | 7 | 4,780,604   | 41,617,294  | 2 | 2 | 4 | 0 |
| Case 74 | 7 | 41,633,917  | 42,229,946  | 2 | 1 | 3 | 0 |
| Case 74 | 7 | 42,232,422  | 44,466,729  | 3 | 2 | 5 | 0 |
| Case 74 | 7 | 44,500,402  | 44,845,032  | 3 | 1 | 4 | 0 |
| Case 74 | 7 | 44,850,696  | 55,975,311  | 3 | 2 | 5 | 0 |
| Case 74 | 7 | 55,980,381  | 57,571,771  | 2 | 2 | 4 | 0 |
| Case 74 | 7 | 57,621,951  | 58,019,061  | 3 | 2 | 5 | 0 |
| Case 74 | 7 | 61,056,053  | 62,577,770  | 3 | 2 | 5 | 0 |
| Case 74 | 7 | 62,627,173  | 63,847,894  | 3 | 0 | 3 | 1 |
| Case 74 | 7 | 63,852,980  | 67,567,429  | 2 | 0 | 2 | 1 |
| Case 74 | 7 | 67,577,782  | 69,945,340  | 3 | 0 | 3 | 1 |
| Case 74 | 7 | 69,946,964  | 70,274,757  | 4 | 0 | 4 | 1 |
| Case 74 | 7 | 70,286,089  | 94,840,916  | 3 | 0 | 3 | 1 |
| Case 74 | 7 | 94,850,268  | 94,950,862  | 4 | 0 | 4 | 1 |
| Case 74 | 7 | 94,951,569  | 108,552,644 | 3 | 0 | 3 | 1 |
| Case 74 | 7 | 108,586,855 | 108,641,894 | 6 | 0 | 6 | 1 |
| Case 74 | 7 | 108,644,659 | 121,699,896 | 3 | 0 | 3 | 1 |

|         |    |             |             |   |   |   |   |
|---------|----|-------------|-------------|---|---|---|---|
| Case 74 | 7  | 121,712,619 | 121,790,934 | 1 | 0 | 1 | 0 |
| Case 74 | 7  | 121,797,265 | 133,859,327 | 3 | 0 | 3 | 1 |
| Case 74 | 7  | 133,863,343 | 136,793,350 | 4 | 0 | 4 | 1 |
| Case 74 | 7  | 136,794,060 | 136,804,753 | 5 | 0 | 5 | 1 |
| Case 74 | 7  | 136,811,372 | 146,204,005 | 4 | 0 | 4 | 1 |
| Case 74 | 7  | 146,204,352 | 146,677,310 | 2 | 0 | 2 | 1 |
| Case 74 | 7  | 146,682,211 | 146,731,727 | 0 | 0 | 0 | 0 |
| Case 74 | 7  | 146,740,577 | 147,320,252 | 2 | 0 | 2 | 1 |
| Case 74 | 7  | 147,333,930 | 147,955,394 | 4 | 0 | 4 | 1 |
| Case 74 | 7  | 147,956,916 | 148,069,482 | 3 | 0 | 3 | 1 |
| Case 74 | 7  | 148,080,647 | 159,119,486 | 4 | 0 | 4 | 1 |
| Case 74 | 8  | 164,984     | 42,275,455  | 2 | 0 | 2 | 1 |
| Case 74 | 8  | 42,275,517  | 43,791,691  | 4 | 1 | 5 | 0 |
| Case 74 | 8  | 46,886,735  | 46,886,735  | 4 | 1 | 5 | 0 |
| Case 74 | 8  | 46,942,842  | 99,799,101  | 3 | 2 | 5 | 0 |
| Case 74 | 8  | 99,817,178  | 103,755,301 | 3 | 1 | 4 | 0 |
| Case 74 | 8  | 103,769,678 | 103,830,692 | 4 | 1 | 5 | 0 |
| Case 74 | 8  | 103,838,004 | 104,231,944 | 3 | 1 | 4 | 0 |
| Case 74 | 8  | 104,238,182 | 104,607,119 | 4 | 1 | 5 | 0 |
| Case 74 | 8  | 104,614,003 | 120,303,034 | 3 | 1 | 4 | 0 |
| Case 74 | 8  | 120,327,008 | 120,365,319 | 4 | 1 | 5 | 0 |
| Case 74 | 8  | 120,367,602 | 128,270,980 | 3 | 1 | 4 | 0 |
| Case 74 | 8  | 128,276,154 | 128,356,226 | 4 | 2 | 6 | 0 |
| Case 74 | 8  | 128,364,973 | 138,075,823 | 4 | 1 | 5 | 0 |
| Case 74 | 8  | 138,081,290 | 146,293,414 | 3 | 1 | 4 | 0 |
| Case 74 | 9  | 46,587      | 16,060,417  | 1 | 0 | 1 | 0 |
| Case 74 | 9  | 16,060,746  | 16,449,788  | 2 | 0 | 2 | 1 |
| Case 74 | 9  | 16,450,274  | 18,602,403  | 1 | 0 | 1 | 0 |
| Case 74 | 9  | 18,606,825  | 31,136,986  | 2 | 0 | 2 | 1 |
| Case 74 | 9  | 31,146,393  | 36,816,714  | 4 | 0 | 4 | 1 |
| Case 74 | 9  | 36,819,706  | 46,944,322  | 3 | 0 | 3 | 1 |
| Case 74 | 9  | 65,629,772  | 78,430,918  | 3 | 0 | 3 | 1 |
| Case 74 | 9  | 78,438,434  | 78,640,399  | 4 | 0 | 4 | 1 |
| Case 74 | 9  | 78,641,311  | 112,630,762 | 3 | 0 | 3 | 1 |
| Case 74 | 9  | 112,632,327 | 138,516,109 | 4 | 0 | 4 | 1 |
| Case 74 | 9  | 138,516,119 | 140,147,259 | 3 | 0 | 3 | 1 |
| Case 74 | 9  | 140,147,273 | 141,066,491 | 4 | 0 | 4 | 1 |
| Case 74 | 10 | 98,087      | 4,642,156   | 2 | 2 | 4 | 0 |
| Case 74 | 10 | 4,646,167   | 4,655,565   | 3 | 2 | 5 | 0 |
| Case 74 | 10 | 4,659,197   | 39,097,912  | 2 | 2 | 4 | 0 |
| Case 74 | 10 | 42,436,301  | 42,503,340  | 2 | 2 | 4 | 0 |
| Case 74 | 10 | 42,509,794  | 78,444,456  | 2 | 0 | 2 | 1 |
| Case 74 | 10 | 78,457,588  | 135,477,883 | 3 | 0 | 3 | 1 |
| Case 74 | 11 | 193,146     | 1,408,892   | 3 | 0 | 3 | 1 |
| Case 74 | 11 | 1,418,450   | 14,571,637  | 4 | 0 | 4 | 1 |
| Case 74 | 11 | 14,573,552  | 14,778,269  | 3 | 0 | 3 | 1 |
| Case 74 | 11 | 14,781,621  | 27,794,045  | 4 | 0 | 4 | 1 |
| Case 74 | 11 | 27,799,994  | 28,311,769  | 5 | 0 | 5 | 1 |
| Case 74 | 11 | 28,311,790  | 51,591,253  | 3 | 0 | 3 | 1 |
| Case 74 | 11 | 54,794,237  | 77,498,768  | 3 | 0 | 3 | 1 |
| Case 74 | 11 | 77,526,474  | 77,961,445  | 2 | 0 | 2 | 1 |
| Case 74 | 11 | 77,979,414  | 82,108,925  | 3 | 0 | 3 | 1 |
| Case 74 | 11 | 82,109,154  | 82,430,245  | 4 | 0 | 4 | 1 |
| Case 74 | 11 | 82,433,268  | 86,160,989  | 3 | 0 | 3 | 1 |
| Case 74 | 11 | 86,161,388  | 86,826,422  | 4 | 0 | 4 | 1 |
| Case 74 | 11 | 86,835,374  | 124,464,910 | 3 | 0 | 3 | 1 |
| Case 74 | 11 | 124,466,751 | 124,660,651 | 2 | 0 | 2 | 1 |
| Case 74 | 11 | 124,668,305 | 134,934,063 | 3 | 0 | 3 | 1 |
| Case 74 | 12 | 191,619     | 11,971,896  | 2 | 1 | 3 | 0 |
| Case 74 | 12 | 11,975,818  | 12,172,270  | 3 | 0 | 3 | 1 |
| Case 74 | 12 | 12,173,711  | 12,450,532  | 2 | 0 | 2 | 1 |

|         |    |             |             |   |   |   |   |
|---------|----|-------------|-------------|---|---|---|---|
| Case 74 | 12 | 12,453,808  | 34,853,011  | 2 | 1 | 3 | 0 |
| Case 74 | 12 | 37,876,400  | 52,532,230  | 2 | 1 | 3 | 0 |
| Case 74 | 12 | 52,533,259  | 52,882,790  | 2 | 2 | 4 | 0 |
| Case 74 | 12 | 52,883,510  | 76,258,966  | 2 | 1 | 3 | 0 |
| Case 74 | 12 | 76,260,871  | 76,518,221  | 3 | 1 | 4 | 0 |
| Case 74 | 12 | 76,518,531  | 89,415,356  | 2 | 1 | 3 | 0 |
| Case 74 | 12 | 89,425,822  | 89,555,278  | 2 | 2 | 4 | 0 |
| Case 74 | 12 | 89,576,400  | 98,520,552  | 2 | 1 | 3 | 0 |
| Case 74 | 12 | 98,538,254  | 99,043,435  | 3 | 1 | 4 | 0 |
| Case 74 | 12 | 99,050,366  | 105,657,527 | 2 | 1 | 3 | 0 |
| Case 74 | 12 | 105,660,043 | 105,790,479 | 4 | 1 | 5 | 0 |
| Case 74 | 12 | 105,791,315 | 125,123,792 | 2 | 1 | 3 | 0 |
| Case 74 | 12 | 125,125,074 | 125,242,507 | 3 | 2 | 5 | 0 |
| Case 74 | 12 | 125,245,560 | 133,810,935 | 2 | 1 | 3 | 0 |
| Case 74 | 13 | 19,058,717  | 22,141,005  | 5 | 0 | 5 | 1 |
| Case 74 | 13 | 22,141,038  | 59,072,409  | 4 | 0 | 4 | 1 |
| Case 74 | 13 | 59,082,282  | 59,720,257  | 5 | 0 | 5 | 1 |
| Case 74 | 13 | 59,720,630  | 74,115,700  | 4 | 0 | 4 | 1 |
| Case 74 | 13 | 74,125,798  | 74,233,658  | 5 | 0 | 5 | 1 |
| Case 74 | 13 | 74,234,274  | 82,281,335  | 4 | 0 | 4 | 1 |
| Case 74 | 13 | 82,287,510  | 82,469,145  | 3 | 0 | 3 | 1 |
| Case 74 | 13 | 82,480,892  | 115,103,529 | 4 | 0 | 4 | 1 |
| Case 74 | 14 | 19,280,733  | 23,015,874  | 2 | 1 | 3 | 0 |
| Case 74 | 14 | 23,018,808  | 23,022,546  | 2 | 2 | 4 | 0 |
| Case 74 | 14 | 23,024,150  | 25,841,259  | 2 | 1 | 3 | 0 |
| Case 74 | 14 | 25,843,774  | 27,376,899  | 1 | 1 | 2 | 0 |
| Case 74 | 14 | 27,393,217  | 27,441,159  | 1 | 0 | 1 | 0 |
| Case 74 | 14 | 27,450,705  | 29,889,699  | 1 | 1 | 2 | 0 |
| Case 74 | 14 | 29,891,005  | 43,367,596  | 2 | 1 | 3 | 0 |
| Case 74 | 14 | 43,380,552  | 43,474,406  | 1 | 0 | 1 | 0 |
| Case 74 | 14 | 43,480,483  | 43,876,895  | 2 | 1 | 3 | 0 |
| Case 74 | 14 | 43,878,297  | 44,308,578  | 1 | 0 | 1 | 0 |
| Case 74 | 14 | 44,319,485  | 65,619,418  | 2 | 1 | 3 | 0 |
| Case 74 | 14 | 65,633,561  | 65,878,395  | 3 | 1 | 4 | 0 |
| Case 74 | 14 | 65,884,212  | 67,573,141  | 2 | 1 | 3 | 0 |
| Case 74 | 14 | 67,595,344  | 68,196,636  | 3 | 1 | 4 | 0 |
| Case 74 | 14 | 68,204,433  | 95,181,481  | 1 | 1 | 2 | 0 |
| Case 74 | 14 | 95,185,017  | 95,339,855  | 2 | 1 | 3 | 0 |
| Case 74 | 14 | 95,339,930  | 95,500,447  | 3 | 1 | 4 | 0 |
| Case 74 | 14 | 95,510,787  | 107,287,663 | 2 | 1 | 3 | 0 |
| Case 74 | 15 | 20,034,919  | 25,855,001  | 2 | 0 | 2 | 1 |
| Case 74 | 15 | 25,860,911  | 35,428,218  | 3 | 0 | 3 | 1 |
| Case 74 | 15 | 35,430,469  | 52,254,612  | 2 | 0 | 2 | 1 |
| Case 74 | 15 | 52,254,682  | 53,855,925  | 3 | 0 | 3 | 1 |
| Case 74 | 15 | 53,858,438  | 57,594,066  | 2 | 0 | 2 | 1 |
| Case 74 | 15 | 57,596,350  | 62,132,921  | 3 | 0 | 3 | 1 |
| Case 74 | 15 | 62,135,139  | 62,340,126  | 2 | 0 | 2 | 1 |
| Case 74 | 15 | 62,358,682  | 76,359,055  | 3 | 0 | 3 | 1 |
| Case 74 | 15 | 76,364,087  | 76,462,575  | 4 | 0 | 4 | 1 |
| Case 74 | 15 | 76,469,633  | 97,412,694  | 3 | 0 | 3 | 1 |
| Case 74 | 15 | 97,422,907  | 102,461,162 | 4 | 0 | 4 | 1 |
| Case 74 | 16 | 88,165      | 20,109,653  | 1 | 1 | 2 | 0 |
| Case 74 | 16 | 20,117,365  | 34,020,957  | 2 | 1 | 3 | 0 |
| Case 74 | 16 | 34,194,635  | 35,285,582  | 3 | 1 | 4 | 0 |
| Case 74 | 16 | 46,450,037  | 76,768,178  | 1 | 1 | 2 | 0 |
| Case 74 | 16 | 76,768,372  | 78,524,330  | 2 | 1 | 3 | 0 |
| Case 74 | 16 | 78,527,004  | 78,784,233  | 1 | 0 | 1 | 0 |
| Case 74 | 16 | 78,787,891  | 90,274,695  | 1 | 1 | 2 | 0 |
| Case 74 | 17 | 11,885      | 2,374,333   | 2 | 0 | 2 | 1 |
| Case 74 | 17 | 2,385,240   | 2,490,600   | 3 | 0 | 3 | 1 |
| Case 74 | 17 | 2,502,386   | 12,732,925  | 2 | 0 | 2 | 1 |

|         |    |            |            |   |   |   |   |
|---------|----|------------|------------|---|---|---|---|
| Case 74 | 17 | 12,736,827 | 12,763,748 | 3 | 0 | 3 | 1 |
| Case 74 | 17 | 12,764,883 | 22,242,355 | 2 | 0 | 2 | 1 |
| Case 74 | 17 | 25,268,142 | 25,268,142 | 2 | 0 | 2 | 1 |
| Case 74 | 17 | 25,295,032 | 36,868,162 | 3 | 1 | 4 | 0 |
| Case 74 | 17 | 36,871,936 | 70,563,083 | 2 | 2 | 4 | 0 |
| Case 74 | 17 | 70,564,420 | 70,679,811 | 3 | 2 | 5 | 0 |
| Case 74 | 17 | 70,680,637 | 71,397,320 | 2 | 2 | 4 | 0 |
| Case 74 | 17 | 71,397,326 | 71,442,146 | 3 | 2 | 5 | 0 |
| Case 74 | 17 | 71,442,400 | 77,914,743 | 2 | 2 | 4 | 0 |
| Case 74 | 17 | 77,915,673 | 81,060,040 | 2 | 1 | 3 | 0 |
| Case 74 | 18 | 87,505     | 1,725,758  | 4 | 1 | 5 | 0 |
| Case 74 | 18 | 1,731,154  | 14,942,150 | 4 | 0 | 4 | 1 |
| Case 74 | 18 | 14,949,001 | 15,375,878 | 4 | 1 | 5 | 0 |
| Case 74 | 18 | 18,520,354 | 19,437,171 | 4 | 1 | 5 | 0 |
| Case 74 | 18 | 19,444,613 | 19,940,195 | 5 | 1 | 6 | 0 |
| Case 74 | 18 | 19,947,663 | 22,260,977 | 3 | 1 | 4 | 0 |
| Case 74 | 18 | 22,262,327 | 30,755,662 | 4 | 1 | 5 | 0 |
| Case 74 | 18 | 30,760,966 | 33,381,348 | 3 | 3 | 6 | 0 |
| Case 74 | 18 | 33,396,298 | 33,543,660 | 4 | 4 | 8 | 0 |
| Case 74 | 18 | 33,552,425 | 34,914,746 | 3 | 3 | 6 | 0 |
| Case 74 | 18 | 34,916,800 | 37,837,257 | 4 | 1 | 5 | 0 |
| Case 74 | 18 | 37,839,146 | 39,737,456 | 4 | 3 | 7 | 0 |
| Case 74 | 18 | 39,745,130 | 42,192,225 | 3 | 3 | 6 | 0 |
| Case 74 | 18 | 42,192,418 | 43,959,025 | 4 | 1 | 5 | 0 |
| Case 74 | 18 | 43,960,199 | 52,717,564 | 4 | 0 | 4 | 1 |
| Case 74 | 18 | 52,720,869 | 53,034,581 | 5 | 0 | 5 | 1 |
| Case 74 | 18 | 53,043,220 | 62,682,366 | 4 | 0 | 4 | 1 |
| Case 74 | 18 | 62,683,556 | 78,015,180 | 2 | 0 | 2 | 1 |
| Case 74 | 19 | 260,912    | 13,135,981 | 2 | 0 | 2 | 1 |
| Case 74 | 19 | 13,153,035 | 20,426,003 | 3 | 0 | 3 | 1 |
| Case 74 | 19 | 20,430,665 | 21,740,932 | 1 | 0 | 1 | 0 |
| Case 74 | 19 | 21,752,009 | 24,629,285 | 2 | 0 | 2 | 1 |
| Case 74 | 19 | 27,732,159 | 27,763,440 | 2 | 0 | 2 | 1 |
| Case 74 | 19 | 27,801,814 | 28,818,232 | 3 | 1 | 4 | 0 |
| Case 74 | 19 | 28,822,169 | 29,554,195 | 4 | 1 | 5 | 0 |
| Case 74 | 19 | 29,556,972 | 30,199,200 | 6 | 1 | 7 | 0 |
| Case 74 | 19 | 30,199,851 | 30,747,112 | 5 | 1 | 6 | 0 |
| Case 74 | 19 | 30,753,815 | 42,136,626 | 2 | 1 | 3 | 0 |
| Case 74 | 19 | 42,147,477 | 42,460,159 | 2 | 2 | 4 | 0 |
| Case 74 | 19 | 42,462,788 | 49,104,466 | 2 | 1 | 3 | 0 |
| Case 74 | 19 | 49,106,827 | 49,703,651 | 1 | 1 | 2 | 0 |
| Case 74 | 19 | 49,703,764 | 59,097,160 | 2 | 1 | 3 | 0 |
| Case 74 | 20 | 63,244     | 13,582,476 | 4 | 1 | 5 | 0 |
| Case 74 | 20 | 13,585,307 | 13,845,845 | 4 | 3 | 7 | 0 |
| Case 74 | 20 | 13,846,084 | 13,998,098 | 4 | 1 | 5 | 0 |
| Case 74 | 20 | 14,021,556 | 14,742,886 | 3 | 1 | 4 | 0 |
| Case 74 | 20 | 14,745,223 | 23,011,468 | 4 | 1 | 5 | 0 |
| Case 74 | 20 | 23,015,092 | 26,293,985 | 3 | 1 | 4 | 0 |
| Case 74 | 20 | 29,425,357 | 37,713,976 | 3 | 1 | 4 | 0 |
| Case 74 | 20 | 37,722,023 | 60,326,201 | 4 | 1 | 5 | 0 |
| Case 74 | 20 | 60,330,913 | 62,948,788 | 3 | 1 | 4 | 0 |
| Case 74 | 21 | 10,827,533 | 10,971,337 | 2 | 1 | 3 | 0 |
| Case 74 | 21 | 14,368,320 | 17,877,794 | 2 | 1 | 3 | 0 |
| Case 74 | 21 | 17,882,331 | 19,526,572 | 3 | 1 | 4 | 0 |
| Case 74 | 21 | 19,527,049 | 20,431,363 | 4 | 1 | 5 | 0 |
| Case 74 | 21 | 20,436,807 | 23,294,509 | 3 | 1 | 4 | 0 |
| Case 74 | 21 | 23,295,949 | 39,615,764 | 2 | 1 | 3 | 0 |
| Case 74 | 21 | 39,626,421 | 48,100,155 | 2 | 2 | 4 | 0 |
| Case 74 | 22 | 16,114,244 | 25,225,879 | 1 | 1 | 2 | 0 |
| Case 74 | 22 | 25,227,897 | 28,603,212 | 2 | 1 | 3 | 0 |
| Case 74 | 22 | 28,604,583 | 37,858,097 | 1 | 1 | 2 | 0 |

|         |    |             |             |   |   |   |   |
|---------|----|-------------|-------------|---|---|---|---|
| Case 74 | 22 | 37,863,459  | 38,004,202  | 2 | 1 | 3 | 0 |
| Case 74 | 22 | 38,007,812  | 51,195,728  | 1 | 1 | 2 | 0 |
| Case 74 | X  | 2,700,157   | 10,096,418  | 3 | 0 | 3 | 1 |
| Case 74 | X  | 10,098,055  | 10,349,835  | 2 | 0 | 2 | 1 |
| Case 74 | X  | 10,360,284  | 39,252,819  | 3 | 0 | 3 | 1 |
| Case 74 | X  | 39,254,277  | 46,112,948  | 2 | 0 | 2 | 1 |
| Case 74 | X  | 46,112,988  | 46,285,456  | 3 | 0 | 3 | 1 |
| Case 74 | X  | 46,301,359  | 46,920,599  | 2 | 0 | 2 | 1 |
| Case 74 | X  | 46,941,458  | 58,488,110  | 3 | 0 | 3 | 1 |
| Case 74 | X  | 61,694,576  | 96,029,506  | 3 | 0 | 3 | 1 |
| Case 74 | X  | 96,042,106  | 126,087,266 | 2 | 0 | 2 | 1 |
| Case 74 | X  | 126,092,064 | 126,563,086 | 1 | 0 | 1 | 0 |
| Case 74 | X  | 126,585,734 | 154,898,561 | 2 | 0 | 2 | 1 |
| Case 75 | 1  | 82,154      | 39,550,621  | 2 | 1 | 3 | 0 |
| Case 75 | 1  | 39,551,621  | 39,651,652  | 2 | 2 | 4 | 0 |
| Case 75 | 1  | 39,662,654  | 64,059,403  | 2 | 1 | 3 | 0 |
| Case 75 | 1  | 64,075,768  | 64,357,060  | 2 | 2 | 4 | 0 |
| Case 75 | 1  | 64,358,246  | 72,428,834  | 2 | 1 | 3 | 0 |
| Case 75 | 1  | 72,433,346  | 120,464,998 | 2 | 2 | 4 | 0 |
| Case 75 | 1  | 120,465,007 | 121,346,616 | 3 | 0 | 3 | 1 |
| Case 75 | 1  | 142,649,718 | 161,257,358 | 3 | 3 | 6 | 0 |
| Case 75 | 1  | 161,260,215 | 165,199,343 | 4 | 3 | 7 | 0 |
| Case 75 | 1  | 165,207,875 | 168,431,914 | 4 | 2 | 6 | 0 |
| Case 75 | 1  | 168,436,436 | 173,478,877 | 5 | 2 | 7 | 0 |
| Case 75 | 1  | 173,486,716 | 190,735,457 | 4 | 2 | 6 | 0 |
| Case 75 | 1  | 190,750,491 | 191,040,861 | 5 | 2 | 7 | 0 |
| Case 75 | 1  | 191,062,388 | 195,567,234 | 4 | 2 | 6 | 0 |
| Case 75 | 1  | 195,568,383 | 195,747,936 | 5 | 2 | 7 | 0 |
| Case 75 | 1  | 195,749,012 | 200,483,591 | 4 | 2 | 6 | 0 |
| Case 75 | 1  | 200,491,167 | 205,662,977 | 3 | 2 | 5 | 0 |
| Case 75 | 1  | 205,676,263 | 208,515,347 | 4 | 2 | 6 | 0 |
| Case 75 | 1  | 208,517,277 | 208,646,090 | 3 | 2 | 5 | 0 |
| Case 75 | 1  | 208,674,351 | 240,869,087 | 4 | 2 | 6 | 0 |
| Case 75 | 1  | 240,870,238 | 240,917,525 | 6 | 2 | 8 | 0 |
| Case 75 | 1  | 240,919,826 | 242,531,654 | 4 | 2 | 6 | 0 |
| Case 75 | 1  | 242,532,846 | 242,663,902 | 5 | 2 | 7 | 0 |
| Case 75 | 1  | 242,666,992 | 249,218,992 | 4 | 2 | 6 | 0 |
| Case 75 | 2  | 18,674      | 14,525,844  | 3 | 1 | 4 | 0 |
| Case 75 | 2  | 14,528,945  | 14,632,564  | 1 | 0 | 1 | 0 |
| Case 75 | 2  | 14,648,430  | 47,387,187  | 3 | 1 | 4 | 0 |
| Case 75 | 2  | 47,390,058  | 74,382,173  | 2 | 1 | 3 | 0 |
| Case 75 | 2  | 74,392,940  | 77,429,576  | 2 | 2 | 4 | 0 |
| Case 75 | 2  | 77,437,279  | 78,342,416  | 2 | 0 | 2 | 1 |
| Case 75 | 2  | 78,346,731  | 78,696,239  | 1 | 0 | 1 | 0 |
| Case 75 | 2  | 78,699,428  | 84,324,021  | 2 | 0 | 2 | 1 |
| Case 75 | 2  | 84,328,335  | 92,081,640  | 3 | 0 | 3 | 1 |
| Case 75 | 2  | 95,429,424  | 130,683,344 | 4 | 0 | 4 | 1 |
| Case 75 | 2  | 130,683,532 | 140,395,703 | 3 | 0 | 3 | 1 |
| Case 75 | 2  | 140,406,216 | 141,806,707 | 3 | 2 | 5 | 0 |
| Case 75 | 2  | 141,810,244 | 146,752,161 | 3 | 0 | 3 | 1 |
| Case 75 | 2  | 146,764,156 | 172,468,776 | 3 | 2 | 5 | 0 |
| Case 75 | 2  | 172,472,584 | 172,510,689 | 4 | 3 | 7 | 0 |
| Case 75 | 2  | 172,511,925 | 187,907,901 | 3 | 2 | 5 | 0 |
| Case 75 | 2  | 187,929,901 | 188,308,640 | 2 | 2 | 4 | 0 |
| Case 75 | 2  | 188,326,763 | 205,875,407 | 3 | 2 | 5 | 0 |
| Case 75 | 2  | 205,883,547 | 206,140,982 | 4 | 2 | 6 | 0 |
| Case 75 | 2  | 206,144,833 | 206,359,207 | 3 | 1 | 4 | 0 |
| Case 75 | 2  | 206,363,651 | 206,461,610 | 2 | 1 | 3 | 0 |
| Case 75 | 2  | 206,464,465 | 225,943,606 | 2 | 2 | 4 | 0 |
| Case 75 | 2  | 225,946,531 | 226,041,219 | 4 | 2 | 6 | 0 |
| Case 75 | 2  | 226,053,521 | 234,653,938 | 2 | 2 | 4 | 0 |

|         |   |             |             |   |   |    |   |
|---------|---|-------------|-------------|---|---|----|---|
| Case 75 | 2 | 234,655,144 | 234,666,581 | 3 | 2 | 5  | 0 |
| Case 75 | 2 | 234,667,582 | 243,048,760 | 2 | 2 | 4  | 0 |
| Case 75 | 3 | 61,495      | 8,358,721   | 6 | 0 | 6  | 1 |
| Case 75 | 3 | 8,359,650   | 11,675,789  | 5 | 0 | 5  | 1 |
| Case 75 | 3 | 11,677,077  | 11,932,455  | 7 | 0 | 7  | 1 |
| Case 75 | 3 | 11,940,847  | 16,684,658  | 5 | 0 | 5  | 1 |
| Case 75 | 3 | 16,686,195  | 36,534,540  | 6 | 0 | 6  | 1 |
| Case 75 | 3 | 36,545,740  | 42,799,804  | 4 | 0 | 4  | 1 |
| Case 75 | 3 | 42,800,291  | 42,863,739  | 3 | 0 | 3  | 1 |
| Case 75 | 3 | 42,865,044  | 46,323,859  | 4 | 0 | 4  | 1 |
| Case 75 | 3 | 46,336,781  | 53,096,394  | 3 | 0 | 3  | 1 |
| Case 75 | 3 | 53,098,775  | 74,352,388  | 4 | 0 | 4  | 1 |
| Case 75 | 3 | 74,358,189  | 86,890,846  | 3 | 0 | 3  | 1 |
| Case 75 | 3 | 86,896,008  | 90,442,925  | 3 | 1 | 4  | 0 |
| Case 75 | 3 | 93,537,290  | 93,791,390  | 3 | 1 | 4  | 0 |
| Case 75 | 3 | 93,803,000  | 102,935,573 | 2 | 1 | 3  | 0 |
| Case 75 | 3 | 102,946,216 | 103,061,020 | 4 | 1 | 5  | 0 |
| Case 75 | 3 | 103,062,026 | 122,089,359 | 2 | 1 | 3  | 0 |
| Case 75 | 3 | 122,101,721 | 125,410,843 | 3 | 1 | 4  | 0 |
| Case 75 | 3 | 125,435,432 | 145,789,104 | 2 | 1 | 3  | 0 |
| Case 75 | 3 | 145,790,803 | 149,022,622 | 4 | 1 | 5  | 0 |
| Case 75 | 3 | 149,022,765 | 156,707,330 | 5 | 1 | 6  | 0 |
| Case 75 | 3 | 156,709,318 | 161,008,125 | 6 | 1 | 7  | 0 |
| Case 75 | 3 | 161,014,276 | 168,715,048 | 7 | 1 | 8  | 0 |
| Case 75 | 3 | 168,715,259 | 172,394,890 | 6 | 1 | 7  | 0 |
| Case 75 | 3 | 172,395,351 | 175,216,853 | 7 | 1 | 8  | 0 |
| Case 75 | 3 | 175,218,006 | 182,840,938 | 6 | 1 | 7  | 0 |
| Case 75 | 3 | 182,841,990 | 187,924,902 | 5 | 1 | 6  | 0 |
| Case 75 | 3 | 187,930,047 | 193,495,514 | 6 | 1 | 7  | 0 |
| Case 75 | 3 | 193,505,467 | 197,838,262 | 5 | 1 | 6  | 0 |
| Case 75 | 4 | 71,566      | 49,620,898  | 2 | 2 | 4  | 0 |
| Case 75 | 4 | 52,697,856  | 87,074,032  | 2 | 2 | 4  | 0 |
| Case 75 | 4 | 87,076,360  | 87,362,834  | 2 | 1 | 3  | 0 |
| Case 75 | 4 | 87,369,063  | 97,476,439  | 2 | 2 | 4  | 0 |
| Case 75 | 4 | 97,489,174  | 97,623,215  | 2 | 1 | 3  | 0 |
| Case 75 | 4 | 97,627,011  | 111,584,419 | 2 | 2 | 4  | 0 |
| Case 75 | 4 | 111,598,749 | 114,551,579 | 2 | 0 | 2  | 1 |
| Case 75 | 4 | 114,555,661 | 132,298,239 | 2 | 2 | 4  | 0 |
| Case 75 | 4 | 132,305,574 | 133,156,160 | 4 | 2 | 6  | 0 |
| Case 75 | 4 | 133,157,721 | 134,872,709 | 3 | 2 | 5  | 0 |
| Case 75 | 4 | 134,888,185 | 135,252,930 | 2 | 1 | 3  | 0 |
| Case 75 | 4 | 135,278,000 | 136,606,270 | 2 | 2 | 4  | 0 |
| Case 75 | 4 | 136,613,685 | 154,376,222 | 3 | 2 | 5  | 0 |
| Case 75 | 4 | 154,378,572 | 156,008,037 | 3 | 0 | 3  | 1 |
| Case 75 | 4 | 156,016,684 | 169,390,717 | 2 | 0 | 2  | 1 |
| Case 75 | 4 | 169,394,314 | 171,043,706 | 3 | 0 | 3  | 1 |
| Case 75 | 4 | 171,044,796 | 183,654,099 | 2 | 0 | 2  | 1 |
| Case 75 | 4 | 183,655,548 | 187,903,412 | 3 | 0 | 3  | 1 |
| Case 75 | 4 | 187,903,476 | 190,963,766 | 2 | 0 | 2  | 1 |
| Case 75 | 5 | 38,139      | 969,285     | 3 | 3 | 6  | 0 |
| Case 75 | 5 | 979,148     | 1,169,112   | 4 | 3 | 7  | 0 |
| Case 75 | 5 | 1,170,323   | 1,189,347   | 7 | 3 | 10 | 0 |
| Case 75 | 5 | 1,190,088   | 1,294,138   | 4 | 2 | 6  | 0 |
| Case 75 | 5 | 1,294,166   | 1,753,306   | 3 | 3 | 6  | 0 |
| Case 75 | 5 | 1,759,000   | 32,427,587  | 4 | 0 | 4  | 1 |
| Case 75 | 5 | 32,428,018  | 32,733,968  | 6 | 0 | 6  | 1 |
| Case 75 | 5 | 32,734,327  | 46,399,093  | 4 | 0 | 4  | 1 |
| Case 75 | 5 | 49,457,282  | 49,457,282  | 4 | 0 | 4  | 1 |
| Case 75 | 5 | 49,470,083  | 70,997,465  | 2 | 0 | 2  | 1 |
| Case 75 | 5 | 70,998,053  | 82,376,926  | 3 | 0 | 3  | 1 |
| Case 75 | 5 | 82,377,004  | 131,258,378 | 2 | 0 | 2  | 1 |

|         |   |             |             |   |   |   |   |
|---------|---|-------------|-------------|---|---|---|---|
| Case 75 | 5 | 131,271,022 | 139,684,364 | 3 | 0 | 3 | 1 |
| Case 75 | 5 | 139,695,230 | 140,183,237 | 4 | 0 | 4 | 1 |
| Case 75 | 5 | 140,183,823 | 143,197,848 | 3 | 0 | 3 | 1 |
| Case 75 | 5 | 143,200,053 | 145,720,431 | 2 | 0 | 2 | 1 |
| Case 75 | 5 | 145,732,560 | 160,537,025 | 3 | 0 | 3 | 1 |
| Case 75 | 5 | 160,537,180 | 163,072,880 | 2 | 0 | 2 | 1 |
| Case 75 | 5 | 163,082,728 | 163,290,591 | 0 | 0 | 0 | 0 |
| Case 75 | 5 | 163,306,841 | 166,233,909 | 2 | 0 | 2 | 1 |
| Case 75 | 5 | 166,245,766 | 170,096,737 | 3 | 0 | 3 | 1 |
| Case 75 | 5 | 170,099,077 | 170,239,112 | 4 | 0 | 4 | 1 |
| Case 75 | 5 | 170,240,423 | 180,693,127 | 3 | 0 | 3 | 1 |
| Case 75 | 6 | 108,666     | 1,707,399   | 4 | 2 | 6 | 0 |
| Case 75 | 6 | 1,708,871   | 1,786,340   | 3 | 2 | 5 | 0 |
| Case 75 | 6 | 1,792,608   | 2,097,686   | 2 | 0 | 2 | 1 |
| Case 75 | 6 | 2,106,309   | 30,717,389  | 4 | 2 | 6 | 0 |
| Case 75 | 6 | 30,717,637  | 31,044,863  | 3 | 3 | 6 | 0 |
| Case 75 | 6 | 31,046,528  | 31,464,739  | 4 | 2 | 6 | 0 |
| Case 75 | 6 | 31,465,726  | 32,169,288  | 3 | 2 | 5 | 0 |
| Case 75 | 6 | 32,169,574  | 32,878,275  | 4 | 2 | 6 | 0 |
| Case 75 | 6 | 32,879,233  | 34,118,586  | 3 | 2 | 5 | 0 |
| Case 75 | 6 | 34,125,281  | 41,159,801  | 4 | 2 | 6 | 0 |
| Case 75 | 6 | 41,160,572  | 44,525,989  | 3 | 2 | 5 | 0 |
| Case 75 | 6 | 44,526,440  | 57,498,965  | 4 | 2 | 6 | 0 |
| Case 75 | 6 | 57,499,035  | 58,150,777  | 3 | 1 | 4 | 0 |
| Case 75 | 6 | 58,168,152  | 58,641,933  | 4 | 2 | 6 | 0 |
| Case 75 | 6 | 58,653,698  | 58,719,796  | 5 | 1 | 6 | 0 |
| Case 75 | 6 | 58,728,413  | 58,752,089  | 4 | 0 | 4 | 1 |
| Case 75 | 6 | 61,891,118  | 89,620,293  | 4 | 0 | 4 | 1 |
| Case 75 | 6 | 89,633,046  | 89,899,914  | 6 | 0 | 6 | 1 |
| Case 75 | 6 | 89,900,599  | 98,019,080  | 4 | 0 | 4 | 1 |
| Case 75 | 6 | 98,033,236  | 104,483,487 | 6 | 0 | 6 | 1 |
| Case 75 | 6 | 104,484,800 | 112,973,229 | 5 | 0 | 5 | 1 |
| Case 75 | 6 | 112,975,224 | 125,609,217 | 6 | 0 | 6 | 1 |
| Case 75 | 6 | 125,618,969 | 148,179,363 | 5 | 0 | 5 | 1 |
| Case 75 | 6 | 148,180,666 | 148,266,755 | 3 | 0 | 3 | 1 |
| Case 75 | 6 | 148,269,647 | 161,942,405 | 5 | 0 | 5 | 1 |
| Case 75 | 6 | 161,944,019 | 162,234,333 | 4 | 0 | 4 | 1 |
| Case 75 | 6 | 162,236,075 | 162,729,527 | 5 | 0 | 5 | 1 |
| Case 75 | 6 | 162,733,752 | 162,746,359 | 3 | 0 | 3 | 1 |
| Case 75 | 6 | 162,748,555 | 162,888,522 | 5 | 0 | 5 | 1 |
| Case 75 | 6 | 162,888,704 | 162,995,680 | 0 | 0 | 0 | 0 |
| Case 75 | 6 | 162,996,263 | 170,980,171 | 5 | 0 | 5 | 1 |
| Case 75 | 7 | 44,935      | 38,319,339  | 3 | 2 | 5 | 0 |
| Case 75 | 7 | 38,319,378  | 38,412,022  | 4 | 3 | 7 | 0 |
| Case 75 | 7 | 38,412,988  | 58,019,061  | 3 | 2 | 5 | 0 |
| Case 75 | 7 | 61,056,053  | 61,994,170  | 3 | 2 | 5 | 0 |
| Case 75 | 7 | 62,035,570  | 62,479,327  | 2 | 0 | 2 | 1 |
| Case 75 | 7 | 62,510,311  | 66,343,304  | 3 | 0 | 3 | 1 |
| Case 75 | 7 | 66,346,373  | 79,337,748  | 4 | 0 | 4 | 1 |
| Case 75 | 7 | 79,338,211  | 103,563,145 | 3 | 0 | 3 | 1 |
| Case 75 | 7 | 103,570,601 | 108,074,766 | 4 | 0 | 4 | 1 |
| Case 75 | 7 | 108,075,566 | 126,657,390 | 3 | 0 | 3 | 1 |
| Case 75 | 7 | 126,657,545 | 132,732,992 | 4 | 0 | 4 | 1 |
| Case 75 | 7 | 132,741,757 | 132,945,754 | 5 | 0 | 5 | 1 |
| Case 75 | 7 | 132,956,182 | 143,752,228 | 4 | 0 | 4 | 1 |
| Case 75 | 7 | 143,754,959 | 157,502,916 | 3 | 0 | 3 | 1 |
| Case 75 | 7 | 157,508,424 | 157,625,051 | 0 | 0 | 0 | 0 |
| Case 75 | 7 | 157,634,220 | 159,119,486 | 3 | 0 | 3 | 1 |
| Case 75 | 8 | 164,984     | 8,625,041   | 3 | 0 | 3 | 1 |
| Case 75 | 8 | 8,629,936   | 8,894,700   | 5 | 0 | 5 | 1 |
| Case 75 | 8 | 8,895,470   | 13,490,463  | 4 | 0 | 4 | 1 |

|         |    |             |             |   |   |   |   |
|---------|----|-------------|-------------|---|---|---|---|
| Case 75 | 8  | 13,490,995  | 17,169,085  | 3 | 0 | 3 | 1 |
| Case 75 | 8  | 17,171,599  | 27,539,370  | 4 | 0 | 4 | 1 |
| Case 75 | 8  | 27,542,849  | 27,690,627  | 3 | 0 | 3 | 1 |
| Case 75 | 8  | 27,702,453  | 43,791,691  | 4 | 0 | 4 | 1 |
| Case 75 | 8  | 46,886,735  | 53,605,442  | 4 | 0 | 4 | 1 |
| Case 75 | 8  | 53,660,154  | 54,855,680  | 5 | 0 | 5 | 1 |
| Case 75 | 8  | 54,858,494  | 100,222,764 | 4 | 0 | 4 | 1 |
| Case 75 | 8  | 100,252,754 | 125,459,719 | 5 | 0 | 5 | 1 |
| Case 75 | 8  | 125,462,121 | 125,487,498 | 4 | 0 | 4 | 1 |
| Case 75 | 8  | 125,493,942 | 126,254,259 | 5 | 0 | 5 | 1 |
| Case 75 | 8  | 126,264,351 | 126,656,246 | 7 | 0 | 7 | 1 |
| Case 75 | 8  | 126,667,489 | 129,371,875 | 5 | 0 | 5 | 1 |
| Case 75 | 8  | 129,384,895 | 130,727,016 | 6 | 0 | 6 | 1 |
| Case 75 | 8  | 130,727,351 | 145,742,850 | 5 | 0 | 5 | 1 |
| Case 75 | 8  | 145,745,251 | 146,293,414 | 4 | 0 | 4 | 1 |
| Case 75 | 9  | 46,587      | 8,738,267   | 3 | 1 | 4 | 0 |
| Case 75 | 9  | 8,739,061   | 17,976,625  | 2 | 1 | 3 | 0 |
| Case 75 | 9  | 17,987,408  | 18,059,000  | 2 | 2 | 4 | 0 |
| Case 75 | 9  | 18,061,140  | 46,944,322  | 2 | 1 | 3 | 0 |
| Case 75 | 9  | 65,629,772  | 136,507,586 | 2 | 1 | 3 | 0 |
| Case 75 | 9  | 136,508,640 | 141,066,491 | 3 | 2 | 5 | 0 |
| Case 75 | 10 | 98,087      | 14,607,610  | 4 | 1 | 5 | 0 |
| Case 75 | 10 | 14,609,795  | 15,045,021  | 5 | 1 | 6 | 0 |
| Case 75 | 10 | 15,045,263  | 39,097,912  | 4 | 1 | 5 | 0 |
| Case 75 | 10 | 42,436,301  | 42,503,340  | 4 | 1 | 5 | 0 |
| Case 75 | 10 | 42,509,794  | 78,122,729  | 2 | 1 | 3 | 0 |
| Case 75 | 10 | 78,133,074  | 78,341,485  | 2 | 0 | 2 | 1 |
| Case 75 | 10 | 78,392,318  | 89,352,346  | 2 | 1 | 3 | 0 |
| Case 75 | 10 | 89,355,313  | 89,381,993  | 3 | 2 | 5 | 0 |
| Case 75 | 10 | 89,385,484  | 92,917,925  | 2 | 1 | 3 | 0 |
| Case 75 | 10 | 92,926,700  | 118,444,339 | 2 | 2 | 4 | 0 |
| Case 75 | 10 | 118,448,078 | 118,567,672 | 3 | 2 | 5 | 0 |
| Case 75 | 10 | 118,568,352 | 135,477,883 | 2 | 2 | 4 | 0 |
| Case 75 | 11 | 193,146     | 4,335,548   | 3 | 1 | 4 | 0 |
| Case 75 | 11 | 4,387,760   | 12,082,861  | 2 | 1 | 3 | 0 |
| Case 75 | 11 | 12,083,368  | 12,505,324  | 4 | 1 | 5 | 0 |
| Case 75 | 11 | 12,517,482  | 50,697,498  | 2 | 1 | 3 | 0 |
| Case 75 | 11 | 51,095,992  | 51,591,253  | 2 | 2 | 4 | 0 |
| Case 75 | 11 | 54,794,237  | 116,501,684 | 2 | 2 | 4 | 0 |
| Case 75 | 11 | 116,504,377 | 116,822,034 | 4 | 2 | 6 | 0 |
| Case 75 | 11 | 116,826,870 | 117,820,561 | 2 | 2 | 4 | 0 |
| Case 75 | 11 | 117,823,425 | 118,344,558 | 4 | 2 | 6 | 0 |
| Case 75 | 11 | 118,344,600 | 118,405,249 | 3 | 2 | 5 | 0 |
| Case 75 | 11 | 118,405,835 | 131,468,095 | 2 | 2 | 4 | 0 |
| Case 75 | 11 | 131,469,762 | 134,934,063 | 3 | 2 | 5 | 0 |
| Case 75 | 12 | 191,619     | 5,603,540   | 2 | 2 | 4 | 0 |
| Case 75 | 12 | 5,603,607   | 5,988,271   | 3 | 2 | 5 | 0 |
| Case 75 | 12 | 5,988,827   | 34,853,011  | 2 | 2 | 4 | 0 |
| Case 75 | 12 | 37,876,400  | 37,961,768  | 2 | 2 | 4 | 0 |
| Case 75 | 12 | 38,072,773  | 38,416,139  | 2 | 1 | 3 | 0 |
| Case 75 | 12 | 38,424,982  | 48,151,789  | 2 | 2 | 4 | 0 |
| Case 75 | 12 | 48,152,995  | 48,278,190  | 3 | 2 | 5 | 0 |
| Case 75 | 12 | 48,278,487  | 52,593,059  | 2 | 2 | 4 | 0 |
| Case 75 | 12 | 52,594,827  | 52,680,049  | 3 | 2 | 5 | 0 |
| Case 75 | 12 | 52,680,104  | 58,287,202  | 2 | 2 | 4 | 0 |
| Case 75 | 12 | 58,293,664  | 114,438,918 | 2 | 1 | 3 | 0 |
| Case 75 | 12 | 114,440,169 | 133,810,935 | 2 | 2 | 4 | 0 |
| Case 75 | 13 | 19,058,717  | 31,765,139  | 3 | 0 | 3 | 1 |
| Case 75 | 13 | 31,767,035  | 49,810,881  | 2 | 0 | 2 | 1 |
| Case 75 | 13 | 49,815,405  | 54,064,981  | 4 | 2 | 6 | 0 |
| Case 75 | 13 | 54,065,460  | 57,190,005  | 5 | 2 | 7 | 0 |



|         |    |             |             |   |   |    |   |
|---------|----|-------------|-------------|---|---|----|---|
| Case 75 | 13 | 57,193,801  | 59,152,021  | 8 | 2 | 10 | 0 |
| Case 75 | 13 | 59,155,431  | 85,073,071  | 7 | 2 | 9  | 0 |
| Case 75 | 13 | 85,073,946  | 95,672,950  | 6 | 2 | 8  | 0 |
| Case 75 | 13 | 95,673,135  | 95,866,060  | 5 | 2 | 7  | 0 |
| Case 75 | 13 | 95,866,067  | 95,877,302  | 7 | 2 | 9  | 0 |
| Case 75 | 13 | 95,878,842  | 95,954,327  | 5 | 2 | 7  | 0 |
| Case 75 | 13 | 95,955,076  | 98,757,238  | 6 | 2 | 8  | 0 |
| Case 75 | 13 | 98,758,821  | 101,614,430 | 5 | 2 | 7  | 0 |
| Case 75 | 13 | 101,615,109 | 109,557,930 | 6 | 2 | 8  | 0 |
| Case 75 | 13 | 109,559,422 | 111,588,967 | 5 | 2 | 7  | 0 |
| Case 75 | 13 | 111,590,028 | 111,720,978 | 6 | 2 | 8  | 0 |
| Case 75 | 13 | 111,721,756 | 115,103,529 | 5 | 1 | 6  | 0 |
| Case 75 | 14 | 19,280,733  | 20,420,338  | 3 | 2 | 5  | 0 |
| Case 75 | 14 | 20,425,051  | 20,719,360  | 2 | 2 | 4  | 0 |
| Case 75 | 14 | 20,723,446  | 20,761,616  | 3 | 2 | 5  | 0 |
| Case 75 | 14 | 20,763,446  | 22,591,988  | 2 | 2 | 4  | 0 |
| Case 75 | 14 | 22,592,994  | 22,977,222  | 3 | 2 | 5  | 0 |
| Case 75 | 14 | 22,978,335  | 44,188,271  | 2 | 2 | 4  | 0 |
| Case 75 | 14 | 44,201,175  | 44,784,651  | 2 | 1 | 3  | 0 |
| Case 75 | 14 | 44,790,061  | 107,287,663 | 2 | 2 | 4  | 0 |
| Case 75 | 15 | 20,034,919  | 31,439,804  | 2 | 2 | 4  | 0 |
| Case 75 | 15 | 31,440,697  | 31,655,208  | 3 | 2 | 5  | 0 |
| Case 75 | 15 | 31,656,554  | 64,502,960  | 2 | 2 | 4  | 0 |
| Case 75 | 15 | 64,508,763  | 64,965,815  | 1 | 1 | 2  | 0 |
| Case 75 | 15 | 64,966,252  | 72,451,247  | 2 | 2 | 4  | 0 |
| Case 75 | 15 | 72,451,827  | 90,302,399  | 3 | 2 | 5  | 0 |
| Case 75 | 15 | 90,302,503  | 90,891,982  | 4 | 2 | 6  | 0 |
| Case 75 | 15 | 90,895,265  | 102,461,162 | 3 | 2 | 5  | 0 |
| Case 75 | 16 | 88,165      | 133,946     | 3 | 0 | 3  | 1 |
| Case 75 | 16 | 135,414     | 2,788,281   | 2 | 0 | 2  | 1 |
| Case 75 | 16 | 2,807,263   | 4,042,449   | 3 | 0 | 3  | 1 |
| Case 75 | 16 | 4,049,365   | 4,969,222   | 2 | 2 | 4  | 0 |
| Case 75 | 16 | 4,972,963   | 8,941,598   | 3 | 2 | 5  | 0 |
| Case 75 | 16 | 8,941,654   | 9,224,319   | 4 | 2 | 6  | 0 |
| Case 75 | 16 | 9,226,385   | 25,211,679  | 3 | 2 | 5  | 0 |
| Case 75 | 16 | 25,224,437  | 35,285,582  | 2 | 1 | 3  | 0 |
| Case 75 | 16 | 46,450,037  | 62,259,605  | 3 | 2 | 5  | 0 |
| Case 75 | 16 | 62,261,983  | 63,259,304  | 5 | 2 | 7  | 0 |
| Case 75 | 16 | 63,265,775  | 63,714,811  | 6 | 2 | 8  | 0 |
| Case 75 | 16 | 63,715,660  | 66,413,195  | 5 | 2 | 7  | 0 |
| Case 75 | 16 | 66,413,243  | 69,497,810  | 4 | 2 | 6  | 0 |
| Case 75 | 16 | 69,509,506  | 70,779,144  | 5 | 1 | 6  | 0 |
| Case 75 | 16 | 70,782,922  | 71,218,789  | 4 | 2 | 6  | 0 |
| Case 75 | 16 | 71,220,668  | 72,234,472  | 5 | 2 | 7  | 0 |
| Case 75 | 16 | 72,243,624  | 72,431,989  | 6 | 2 | 8  | 0 |
| Case 75 | 16 | 72,450,482  | 73,816,034  | 5 | 2 | 7  | 0 |
| Case 75 | 16 | 73,816,322  | 74,277,844  | 6 | 2 | 8  | 0 |
| Case 75 | 16 | 74,286,577  | 75,556,838  | 5 | 2 | 7  | 0 |
| Case 75 | 16 | 75,558,461  | 75,690,977  | 4 | 2 | 6  | 0 |
| Case 75 | 16 | 75,696,506  | 77,188,359  | 5 | 2 | 7  | 0 |
| Case 75 | 16 | 77,190,073  | 79,013,587  | 4 | 2 | 6  | 0 |
| Case 75 | 16 | 79,016,116  | 88,348,934  | 2 | 1 | 3  | 0 |
| Case 75 | 16 | 88,353,300  | 88,580,796  | 2 | 2 | 4  | 0 |
| Case 75 | 16 | 88,580,854  | 89,924,847  | 2 | 1 | 3  | 0 |
| Case 75 | 16 | 89,925,556  | 90,274,695  | 3 | 2 | 5  | 0 |
| Case 75 | 17 | 11,885      | 4,154,426   | 4 | 0 | 4  | 1 |
| Case 75 | 17 | 4,156,190   | 4,519,139   | 5 | 0 | 5  | 1 |
| Case 75 | 17 | 4,523,167   | 13,152,158  | 4 | 0 | 4  | 1 |
| Case 75 | 17 | 13,155,911  | 13,523,236  | 3 | 0 | 3  | 1 |
| Case 75 | 17 | 13,530,794  | 13,557,909  | 2 | 0 | 2  | 1 |
| Case 75 | 17 | 13,561,574  | 19,168,912  | 3 | 0 | 3  | 1 |

|         |    |            |            |    |   |    |   |
|---------|----|------------|------------|----|---|----|---|
| Case 75 | 17 | 19,172,196 | 21,318,748 | 5  | 1 | 6  | 0 |
| Case 75 | 17 | 21,318,753 | 22,242,355 | 4  | 2 | 6  | 0 |
| Case 75 | 17 | 25,268,142 | 25,295,032 | 4  | 2 | 6  | 0 |
| Case 75 | 17 | 25,329,949 | 26,519,204 | 3  | 3 | 6  | 0 |
| Case 75 | 17 | 26,549,716 | 26,637,454 | 4  | 3 | 7  | 0 |
| Case 75 | 17 | 26,638,730 | 29,496,343 | 3  | 3 | 6  | 0 |
| Case 75 | 17 | 29,496,486 | 29,532,356 | 5  | 4 | 9  | 0 |
| Case 75 | 17 | 29,543,269 | 35,109,963 | 3  | 3 | 6  | 0 |
| Case 75 | 17 | 35,113,905 | 35,141,201 | 4  | 3 | 7  | 0 |
| Case 75 | 17 | 35,141,462 | 36,484,743 | 3  | 3 | 6  | 0 |
| Case 75 | 17 | 36,485,071 | 37,949,034 | 5  | 3 | 8  | 0 |
| Case 75 | 17 | 37,949,924 | 38,169,714 | 6  | 2 | 8  | 0 |
| Case 75 | 17 | 38,172,305 | 38,264,197 | 5  | 2 | 7  | 0 |
| Case 75 | 17 | 38,277,468 | 39,572,256 | 4  | 2 | 6  | 0 |
| Case 75 | 17 | 39,573,713 | 40,127,060 | 3  | 3 | 6  | 0 |
| Case 75 | 17 | 40,127,537 | 48,978,654 | 4  | 2 | 6  | 0 |
| Case 75 | 17 | 48,983,775 | 53,295,273 | 5  | 2 | 7  | 0 |
| Case 75 | 17 | 53,298,943 | 55,540,976 | 4  | 2 | 6  | 0 |
| Case 75 | 17 | 55,543,961 | 55,653,436 | 2  | 0 | 2  | 1 |
| Case 75 | 17 | 55,656,858 | 57,970,654 | 4  | 2 | 6  | 0 |
| Case 75 | 17 | 57,989,860 | 58,040,269 | 4  | 3 | 7  | 0 |
| Case 75 | 17 | 58,040,356 | 66,714,282 | 4  | 2 | 6  | 0 |
| Case 75 | 17 | 66,719,237 | 66,819,696 | 3  | 0 | 3  | 1 |
| Case 75 | 17 | 66,820,449 | 68,190,826 | 2  | 0 | 2  | 1 |
| Case 75 | 17 | 68,195,046 | 70,217,485 | 5  | 2 | 7  | 0 |
| Case 75 | 17 | 70,218,748 | 71,689,995 | 4  | 2 | 6  | 0 |
| Case 75 | 17 | 71,695,322 | 78,980,375 | 3  | 0 | 3  | 1 |
| Case 75 | 17 | 78,983,575 | 81,060,040 | 2  | 0 | 2  | 1 |
| Case 75 | 18 | 87,505     | 15,375,878 | 4  | 2 | 6  | 0 |
| Case 75 | 18 | 18,520,354 | 27,368,785 | 2  | 2 | 4  | 0 |
| Case 75 | 18 | 27,372,273 | 29,118,843 | 2  | 0 | 2  | 1 |
| Case 75 | 18 | 29,119,490 | 30,454,053 | 3  | 0 | 3  | 1 |
| Case 75 | 18 | 30,458,250 | 34,270,050 | 2  | 0 | 2  | 1 |
| Case 75 | 18 | 34,270,316 | 35,719,478 | 3  | 0 | 3  | 1 |
| Case 75 | 18 | 35,720,709 | 42,810,653 | 2  | 0 | 2  | 1 |
| Case 75 | 18 | 42,819,590 | 49,147,023 | 3  | 0 | 3  | 1 |
| Case 75 | 18 | 49,151,966 | 54,693,531 | 2  | 0 | 2  | 1 |
| Case 75 | 18 | 54,694,151 | 61,246,964 | 3  | 0 | 3  | 1 |
| Case 75 | 18 | 61,246,975 | 71,323,435 | 2  | 0 | 2  | 1 |
| Case 75 | 18 | 71,327,754 | 78,015,180 | 3  | 0 | 3  | 1 |
| Case 75 | 19 | 260,912    | 4,391,334  | 2  | 0 | 2  | 1 |
| Case 75 | 19 | 4,402,017  | 8,920,984  | 3  | 0 | 3  | 1 |
| Case 75 | 19 | 8,921,033  | 8,966,588  | 2  | 0 | 2  | 1 |
| Case 75 | 19 | 8,966,706  | 9,349,367  | 3  | 0 | 3  | 1 |
| Case 75 | 19 | 9,349,460  | 9,531,693  | 2  | 0 | 2  | 1 |
| Case 75 | 19 | 9,536,203  | 11,217,344 | 3  | 0 | 3  | 1 |
| Case 75 | 19 | 11,218,079 | 20,003,341 | 2  | 2 | 4  | 0 |
| Case 75 | 19 | 20,003,485 | 20,466,055 | 4  | 2 | 6  | 0 |
| Case 75 | 19 | 20,470,564 | 24,629,285 | 2  | 2 | 4  | 0 |
| Case 75 | 19 | 27,732,159 | 28,246,742 | 2  | 2 | 4  | 0 |
| Case 75 | 19 | 28,252,131 | 28,554,588 | 6  | 1 | 7  | 0 |
| Case 75 | 19 | 28,556,284 | 28,685,647 | 11 | 1 | 12 | 0 |
| Case 75 | 19 | 28,692,266 | 29,000,203 | 9  | 1 | 10 | 0 |
| Case 75 | 19 | 29,004,322 | 29,348,066 | 6  | 1 | 7  | 0 |
| Case 75 | 19 | 29,348,082 | 29,556,972 | 6  | 2 | 8  | 0 |
| Case 75 | 19 | 29,564,161 | 29,980,809 | 8  | 1 | 9  | 0 |
| Case 75 | 19 | 29,983,323 | 30,079,604 | 6  | 1 | 7  | 0 |
| Case 75 | 19 | 30,080,437 | 30,137,035 | 9  | 1 | 10 | 0 |
| Case 75 | 19 | 30,149,581 | 30,199,200 | 13 | 1 | 14 | 0 |
| Case 75 | 19 | 30,199,851 | 30,308,425 | 9  | 1 | 10 | 0 |
| Case 75 | 19 | 30,312,636 | 30,457,988 | 7  | 1 | 8  | 0 |

|         |    |             |             |    |   |    |   |
|---------|----|-------------|-------------|----|---|----|---|
| Case 75 | 19 | 30,465,196  | 30,609,547  | 12 | 1 | 13 | 0 |
| Case 75 | 19 | 30,610,400  | 30,920,536  | 8  | 1 | 9  | 0 |
| Case 75 | 19 | 30,922,212  | 34,271,079  | 2  | 2 | 4  | 0 |
| Case 75 | 19 | 34,271,505  | 34,436,889  | 3  | 2 | 5  | 0 |
| Case 75 | 19 | 34,439,135  | 44,068,575  | 2  | 2 | 4  | 0 |
| Case 75 | 19 | 44,071,408  | 44,281,562  | 3  | 2 | 5  | 0 |
| Case 75 | 19 | 44,284,965  | 45,574,894  | 2  | 2 | 4  | 0 |
| Case 75 | 19 | 45,575,251  | 45,716,197  | 3  | 2 | 5  | 0 |
| Case 75 | 19 | 45,716,467  | 50,020,163  | 2  | 2 | 4  | 0 |
| Case 75 | 19 | 50,027,765  | 50,444,061  | 3  | 0 | 3  | 1 |
| Case 75 | 19 | 50,451,508  | 50,563,239  | 2  | 0 | 2  | 1 |
| Case 75 | 19 | 50,563,899  | 50,881,054  | 5  | 0 | 5  | 1 |
| Case 75 | 19 | 50,881,968  | 52,385,520  | 3  | 0 | 3  | 1 |
| Case 75 | 19 | 52,386,723  | 53,765,130  | 2  | 0 | 2  | 1 |
| Case 75 | 19 | 53,767,570  | 53,820,000  | 3  | 0 | 3  | 1 |
| Case 75 | 19 | 53,822,594  | 53,968,383  | 2  | 0 | 2  | 1 |
| Case 75 | 19 | 53,970,581  | 59,097,160  | 3  | 0 | 3  | 1 |
| Case 75 | 20 | 63,244      | 26,293,985  | 4  | 2 | 6  | 0 |
| Case 75 | 20 | 29,425,357  | 48,629,456  | 3  | 3 | 6  | 0 |
| Case 75 | 20 | 48,640,477  | 48,678,624  | 5  | 3 | 8  | 0 |
| Case 75 | 20 | 48,684,438  | 49,163,235  | 4  | 3 | 7  | 0 |
| Case 75 | 20 | 49,170,157  | 50,419,766  | 3  | 3 | 6  | 0 |
| Case 75 | 20 | 50,426,860  | 54,766,972  | 4  | 3 | 7  | 0 |
| Case 75 | 20 | 54,768,476  | 62,948,788  | 3  | 3 | 6  | 0 |
| Case 75 | 21 | 10,827,533  | 10,971,337  | 2  | 1 | 3  | 0 |
| Case 75 | 21 | 14,368,320  | 15,372,509  | 2  | 1 | 3  | 0 |
| Case 75 | 21 | 15,375,507  | 33,096,867  | 2  | 0 | 2  | 1 |
| Case 75 | 21 | 33,124,238  | 48,100,155  | 3  | 0 | 3  | 1 |
| Case 75 | 22 | 16,114,244  | 50,468,933  | 5  | 0 | 5  | 1 |
| Case 75 | 22 | 50,470,516  | 51,195,728  | 4  | 0 | 4  | 1 |
| Case 75 | X  | 2,700,157   | 58,488,110  | 3  | 2 | 5  | 0 |
| Case 75 | X  | 61,694,576  | 82,504,054  | 3  | 2 | 5  | 0 |
| Case 75 | X  | 82,529,564  | 91,704,677  | 7  | 2 | 9  | 0 |
| Case 75 | X  | 91,741,660  | 92,269,581  | 5  | 2 | 7  | 0 |
| Case 75 | X  | 92,323,671  | 96,196,880  | 0  | 0 | 0  | 0 |
| Case 75 | X  | 96,204,010  | 139,771,010 | 3  | 0 | 3  | 1 |
| Case 75 | X  | 139,793,630 | 140,078,753 | 5  | 0 | 5  | 1 |
| Case 75 | X  | 140,221,672 | 153,101,092 | 2  | 1 | 3  | 0 |
| Case 75 | X  | 153,119,093 | 154,898,561 | 5  | 0 | 5  | 1 |
| Case 76 | 1  | 82,154      | 874,456     | 2  | 1 | 3  | 0 |
| Case 76 | 1  | 874,501     | 1,756,864   | 2  | 0 | 2  | 1 |
| Case 76 | 1  | 1,762,014   | 14,364,227  | 3  | 0 | 3  | 1 |
| Case 76 | 1  | 14,364,575  | 15,101,472  | 2  | 0 | 2  | 1 |
| Case 76 | 1  | 15,102,393  | 49,627,502  | 3  | 0 | 3  | 1 |
| Case 76 | 1  | 49,664,304  | 71,939,755  | 2  | 0 | 2  | 1 |
| Case 76 | 1  | 71,949,903  | 72,520,941  | 1  | 0 | 1  | 0 |
| Case 76 | 1  | 72,531,155  | 73,111,887  | 2  | 0 | 2  | 1 |
| Case 76 | 1  | 73,116,491  | 79,904,383  | 4  | 0 | 4  | 1 |
| Case 76 | 1  | 79,904,431  | 82,848,779  | 3  | 0 | 3  | 1 |
| Case 76 | 1  | 82,850,151  | 83,234,010  | 4  | 0 | 4  | 1 |
| Case 76 | 1  | 83,237,484  | 106,568,613 | 3  | 0 | 3  | 1 |
| Case 76 | 1  | 106,568,904 | 107,448,618 | 2  | 0 | 2  | 1 |
| Case 76 | 1  | 107,450,588 | 121,346,616 | 3  | 0 | 3  | 1 |
| Case 76 | 1  | 142,649,718 | 161,711,791 | 3  | 0 | 3  | 1 |
| Case 76 | 1  | 161,712,857 | 170,657,994 | 4  | 0 | 4  | 1 |
| Case 76 | 1  | 170,658,355 | 174,363,257 | 3  | 0 | 3  | 1 |
| Case 76 | 1  | 174,369,767 | 174,681,384 | 0  | 0 | 0  | 0 |
| Case 76 | 1  | 174,709,679 | 183,559,704 | 3  | 0 | 3  | 1 |
| Case 76 | 1  | 183,561,560 | 200,861,003 | 4  | 0 | 4  | 1 |
| Case 76 | 1  | 200,862,557 | 213,058,700 | 3  | 0 | 3  | 1 |
| Case 76 | 1  | 213,064,209 | 222,898,838 | 2  | 0 | 2  | 1 |

|         |   |             |             |   |   |   |   |
|---------|---|-------------|-------------|---|---|---|---|
| Case 76 | 1 | 222,904,298 | 223,004,049 | 0 | 0 | 0 | 0 |
| Case 76 | 1 | 223,022,931 | 233,623,860 | 2 | 0 | 2 | 1 |
| Case 76 | 1 | 233,624,614 | 236,413,230 | 3 | 0 | 3 | 1 |
| Case 76 | 1 | 236,416,732 | 238,994,054 | 2 | 2 | 4 | 0 |
| Case 76 | 1 | 239,001,279 | 249,218,992 | 3 | 2 | 5 | 0 |
| Case 76 | 2 | 18,674      | 92,081,640  | 2 | 1 | 3 | 0 |
| Case 76 | 2 | 95,429,424  | 140,962,137 | 2 | 1 | 3 | 0 |
| Case 76 | 2 | 140,966,549 | 141,348,712 | 1 | 1 | 2 | 0 |
| Case 76 | 2 | 141,349,306 | 141,771,962 | 1 | 0 | 1 | 0 |
| Case 76 | 2 | 141,777,554 | 141,826,948 | 2 | 1 | 3 | 0 |
| Case 76 | 2 | 141,830,076 | 141,882,963 | 1 | 1 | 2 | 0 |
| Case 76 | 2 | 141,888,035 | 142,047,759 | 1 | 0 | 1 | 0 |
| Case 76 | 2 | 142,054,467 | 142,143,385 | 1 | 1 | 2 | 0 |
| Case 76 | 2 | 142,148,511 | 153,193,698 | 2 | 1 | 3 | 0 |
| Case 76 | 2 | 153,197,805 | 153,315,366 | 2 | 0 | 2 | 1 |
| Case 76 | 2 | 153,323,026 | 196,345,121 | 2 | 1 | 3 | 0 |
| Case 76 | 2 | 196,351,189 | 202,102,685 | 3 | 1 | 4 | 0 |
| Case 76 | 2 | 202,111,380 | 215,513,430 | 3 | 0 | 3 | 1 |
| Case 76 | 2 | 215,514,980 | 215,752,084 | 2 | 0 | 2 | 1 |
| Case 76 | 2 | 215,755,678 | 238,500,046 | 3 | 0 | 3 | 1 |
| Case 76 | 2 | 238,500,211 | 238,505,625 | 4 | 0 | 4 | 1 |
| Case 76 | 2 | 238,508,099 | 243,048,760 | 3 | 0 | 3 | 1 |
| Case 76 | 3 | 61,495      | 1,503,156   | 1 | 1 | 2 | 0 |
| Case 76 | 3 | 1,503,929   | 1,722,181   | 1 | 0 | 1 | 0 |
| Case 76 | 3 | 1,722,281   | 3,639,025   | 1 | 1 | 2 | 0 |
| Case 76 | 3 | 3,643,141   | 3,689,371   | 1 | 0 | 1 | 0 |
| Case 76 | 3 | 3,690,193   | 21,008,710  | 1 | 1 | 2 | 0 |
| Case 76 | 3 | 21,020,875  | 21,270,162  | 1 | 0 | 1 | 0 |
| Case 76 | 3 | 21,270,688  | 41,266,655  | 1 | 1 | 2 | 0 |
| Case 76 | 3 | 41,267,276  | 59,741,758  | 2 | 1 | 3 | 0 |
| Case 76 | 3 | 59,749,703  | 59,990,805  | 2 | 0 | 2 | 1 |
| Case 76 | 3 | 59,991,608  | 66,914,689  | 2 | 1 | 3 | 0 |
| Case 76 | 3 | 66,917,635  | 67,061,960  | 1 | 1 | 2 | 0 |
| Case 76 | 3 | 67,067,260  | 67,379,361  | 2 | 1 | 3 | 0 |
| Case 76 | 3 | 67,397,253  | 67,476,165  | 2 | 0 | 2 | 1 |
| Case 76 | 3 | 67,506,870  | 71,035,887  | 2 | 1 | 3 | 0 |
| Case 76 | 3 | 71,036,994  | 71,302,616  | 2 | 0 | 2 | 1 |
| Case 76 | 3 | 71,318,993  | 73,052,765  | 2 | 1 | 3 | 0 |
| Case 76 | 3 | 73,074,763  | 73,102,725  | 1 | 1 | 2 | 0 |
| Case 76 | 3 | 73,108,092  | 77,026,968  | 2 | 1 | 3 | 0 |
| Case 76 | 3 | 77,037,626  | 89,686,064  | 2 | 2 | 4 | 0 |
| Case 76 | 3 | 89,697,760  | 90,442,925  | 2 | 0 | 2 | 1 |
| Case 76 | 3 | 93,537,290  | 115,321,358 | 2 | 0 | 2 | 1 |
| Case 76 | 3 | 115,323,184 | 115,402,742 | 1 | 0 | 1 | 0 |
| Case 76 | 3 | 115,403,818 | 115,971,442 | 2 | 0 | 2 | 1 |
| Case 76 | 3 | 115,972,028 | 116,647,795 | 1 | 0 | 1 | 0 |
| Case 76 | 3 | 116,648,690 | 137,771,152 | 2 | 0 | 2 | 1 |
| Case 76 | 3 | 137,776,539 | 137,835,746 | 1 | 0 | 1 | 0 |
| Case 76 | 3 | 137,843,106 | 141,979,191 | 2 | 0 | 2 | 1 |
| Case 76 | 3 | 141,989,460 | 183,141,028 | 2 | 2 | 4 | 0 |
| Case 76 | 3 | 183,141,152 | 184,488,916 | 2 | 1 | 3 | 0 |
| Case 76 | 3 | 184,490,958 | 189,230,306 | 2 | 2 | 4 | 0 |
| Case 76 | 3 | 189,230,922 | 190,084,208 | 3 | 1 | 4 | 0 |
| Case 76 | 3 | 190,087,933 | 193,546,594 | 2 | 2 | 4 | 0 |
| Case 76 | 3 | 193,557,558 | 197,838,262 | 2 | 1 | 3 | 0 |
| Case 76 | 4 | 71,566      | 432,766     | 1 | 0 | 1 | 0 |
| Case 76 | 4 | 435,522     | 49,620,898  | 2 | 1 | 3 | 0 |
| Case 76 | 4 | 52,697,856  | 53,871,388  | 2 | 1 | 3 | 0 |
| Case 76 | 4 | 53,872,674  | 54,380,052  | 1 | 1 | 2 | 0 |
| Case 76 | 4 | 54,381,345  | 60,627,772  | 2 | 1 | 3 | 0 |
| Case 76 | 4 | 60,639,488  | 61,163,718  | 1 | 1 | 2 | 0 |

|         |   |             |             |   |   |   |   |
|---------|---|-------------|-------------|---|---|---|---|
| Case 76 | 4 | 61,170,648  | 63,887,305  | 2 | 1 | 3 | 0 |
| Case 76 | 4 | 63,895,857  | 66,308,481  | 3 | 1 | 4 | 0 |
| Case 76 | 4 | 66,322,437  | 66,917,610  | 1 | 1 | 2 | 0 |
| Case 76 | 4 | 66,923,059  | 81,967,779  | 2 | 1 | 3 | 0 |
| Case 76 | 4 | 81,968,362  | 83,381,564  | 1 | 1 | 2 | 0 |
| Case 76 | 4 | 83,403,563  | 86,222,977  | 2 | 1 | 3 | 0 |
| Case 76 | 4 | 86,251,698  | 103,537,774 | 1 | 1 | 2 | 0 |
| Case 76 | 4 | 103,542,005 | 103,866,468 | 1 | 0 | 1 | 0 |
| Case 76 | 4 | 103,870,091 | 116,316,085 | 1 | 1 | 2 | 0 |
| Case 76 | 4 | 116,332,722 | 116,352,641 | 1 | 0 | 1 | 0 |
| Case 76 | 4 | 116,375,611 | 130,908,815 | 1 | 1 | 2 | 0 |
| Case 76 | 4 | 130,912,560 | 131,003,046 | 2 | 1 | 3 | 0 |
| Case 76 | 4 | 131,003,605 | 156,698,677 | 1 | 1 | 2 | 0 |
| Case 76 | 4 | 156,699,636 | 182,048,692 | 2 | 1 | 3 | 0 |
| Case 76 | 4 | 182,053,380 | 182,407,529 | 1 | 0 | 1 | 0 |
| Case 76 | 4 | 182,407,681 | 182,444,131 | 1 | 1 | 2 | 0 |
| Case 76 | 4 | 182,447,323 | 190,481,771 | 2 | 1 | 3 | 0 |
| Case 76 | 4 | 190,522,201 | 190,963,766 | 1 | 1 | 2 | 0 |
| Case 76 | 5 | 38,139      | 314,935     | 2 | 0 | 2 | 1 |
| Case 76 | 5 | 336,952     | 6,827,513   | 2 | 1 | 3 | 0 |
| Case 76 | 5 | 6,828,995   | 9,209,831   | 3 | 1 | 4 | 0 |
| Case 76 | 5 | 9,215,068   | 9,483,209   | 2 | 1 | 3 | 0 |
| Case 76 | 5 | 9,485,396   | 21,826,642  | 3 | 1 | 4 | 0 |
| Case 76 | 5 | 21,827,593  | 22,219,836  | 2 | 1 | 3 | 0 |
| Case 76 | 5 | 22,222,461  | 30,503,426  | 3 | 1 | 4 | 0 |
| Case 76 | 5 | 30,511,767  | 46,399,093  | 2 | 1 | 3 | 0 |
| Case 76 | 5 | 49,457,282  | 55,028,160  | 2 | 1 | 3 | 0 |
| Case 76 | 5 | 55,029,596  | 180,514,652 | 1 | 1 | 2 | 0 |
| Case 76 | 5 | 180,527,455 | 180,693,127 | 2 | 0 | 2 | 1 |
| Case 76 | 6 | 108,666     | 2,048,584   | 2 | 1 | 3 | 0 |
| Case 76 | 6 | 2,052,811   | 2,276,503   | 0 | 0 | 0 | 0 |
| Case 76 | 6 | 2,277,237   | 2,472,613   | 2 | 0 | 2 | 1 |
| Case 76 | 6 | 2,474,874   | 5,737,122   | 2 | 1 | 3 | 0 |
| Case 76 | 6 | 5,741,436   | 6,040,482   | 1 | 1 | 2 | 0 |
| Case 76 | 6 | 6,047,249   | 37,879,556  | 2 | 1 | 3 | 0 |
| Case 76 | 6 | 37,881,445  | 38,123,030  | 1 | 1 | 2 | 0 |
| Case 76 | 6 | 38,139,482  | 58,752,089  | 2 | 1 | 3 | 0 |
| Case 76 | 6 | 61,891,118  | 101,710,737 | 2 | 1 | 3 | 0 |
| Case 76 | 6 | 101,726,103 | 102,058,891 | 1 | 0 | 1 | 0 |
| Case 76 | 6 | 102,065,160 | 125,528,577 | 2 | 1 | 3 | 0 |
| Case 76 | 6 | 125,528,974 | 125,609,217 | 3 | 1 | 4 | 0 |
| Case 76 | 6 | 125,618,969 | 136,622,032 | 2 | 1 | 3 | 0 |
| Case 76 | 6 | 136,645,817 | 136,760,581 | 1 | 1 | 2 | 0 |
| Case 76 | 6 | 136,765,459 | 162,597,463 | 2 | 1 | 3 | 0 |
| Case 76 | 6 | 162,598,215 | 162,690,634 | 2 | 0 | 2 | 1 |
| Case 76 | 6 | 162,691,418 | 162,779,151 | 1 | 0 | 1 | 0 |
| Case 76 | 6 | 162,789,197 | 162,851,519 | 2 | 0 | 2 | 1 |
| Case 76 | 6 | 162,851,541 | 170,980,171 | 2 | 1 | 3 | 0 |
| Case 76 | 7 | 44,935      | 3,179,991   | 2 | 1 | 3 | 0 |
| Case 76 | 7 | 3,180,657   | 30,246,816  | 2 | 2 | 4 | 0 |
| Case 76 | 7 | 30,251,254  | 30,492,468  | 2 | 1 | 3 | 0 |
| Case 76 | 7 | 30,492,599  | 38,297,145  | 2 | 2 | 4 | 0 |
| Case 76 | 7 | 38,298,285  | 38,358,412  | 3 | 2 | 5 | 0 |
| Case 76 | 7 | 38,358,956  | 47,532,716  | 2 | 2 | 4 | 0 |
| Case 76 | 7 | 47,537,679  | 47,564,745  | 2 | 1 | 3 | 0 |
| Case 76 | 7 | 47,564,942  | 58,019,061  | 2 | 2 | 4 | 0 |
| Case 76 | 7 | 61,056,053  | 69,546,617  | 2 | 2 | 4 | 0 |
| Case 76 | 7 | 69,562,563  | 69,741,327  | 2 | 0 | 2 | 1 |
| Case 76 | 7 | 69,759,833  | 70,169,449  | 1 | 0 | 1 | 0 |
| Case 76 | 7 | 70,171,159  | 71,982,924  | 2 | 0 | 2 | 1 |
| Case 76 | 7 | 72,073,716  | 72,305,671  | 3 | 1 | 4 | 0 |

|         |    |             |             |   |   |   |   |
|---------|----|-------------|-------------|---|---|---|---|
| Case 76 | 7  | 72,413,683  | 146,571,183 | 2 | 0 | 2 | 1 |
| Case 76 | 7  | 146,575,177 | 146,831,849 | 1 | 0 | 1 | 0 |
| Case 76 | 7  | 146,842,500 | 146,997,364 | 2 | 0 | 2 | 1 |
| Case 76 | 7  | 147,001,077 | 147,035,067 | 1 | 0 | 1 | 0 |
| Case 76 | 7  | 147,039,722 | 147,425,466 | 2 | 0 | 2 | 1 |
| Case 76 | 7  | 147,426,374 | 147,549,713 | 1 | 0 | 1 | 0 |
| Case 76 | 7  | 147,558,680 | 159,119,486 | 2 | 0 | 2 | 1 |
| Case 76 | 8  | 164,984     | 43,791,691  | 1 | 1 | 2 | 0 |
| Case 76 | 8  | 46,886,735  | 111,681,660 | 1 | 1 | 2 | 0 |
| Case 76 | 8  | 111,693,132 | 115,711,436 | 2 | 1 | 3 | 0 |
| Case 76 | 8  | 115,712,241 | 115,735,288 | 3 | 1 | 4 | 0 |
| Case 76 | 8  | 115,738,188 | 115,839,385 | 2 | 1 | 3 | 0 |
| Case 76 | 8  | 115,843,061 | 136,017,930 | 3 | 1 | 4 | 0 |
| Case 76 | 8  | 136,024,190 | 140,925,766 | 2 | 1 | 3 | 0 |
| Case 76 | 8  | 140,926,772 | 140,998,950 | 1 | 1 | 2 | 0 |
| Case 76 | 8  | 141,004,455 | 146,293,414 | 2 | 1 | 3 | 0 |
| Case 76 | 9  | 46,587      | 8,889,419   | 1 | 0 | 1 | 0 |
| Case 76 | 9  | 8,890,725   | 10,000,931  | 0 | 0 | 0 | 0 |
| Case 76 | 9  | 10,004,946  | 25,658,472  | 1 | 0 | 1 | 0 |
| Case 76 | 9  | 25,659,418  | 25,677,215  | 0 | 0 | 0 | 0 |
| Case 76 | 9  | 25,677,349  | 28,663,042  | 1 | 0 | 1 | 0 |
| Case 76 | 9  | 28,677,376  | 28,771,619  | 0 | 0 | 0 | 0 |
| Case 76 | 9  | 28,772,999  | 29,374,906  | 1 | 0 | 1 | 0 |
| Case 76 | 9  | 29,393,359  | 29,539,147  | 0 | 0 | 0 | 0 |
| Case 76 | 9  | 29,539,183  | 31,873,011  | 1 | 0 | 1 | 0 |
| Case 76 | 9  | 31,879,919  | 32,696,996  | 5 | 1 | 6 | 0 |
| Case 76 | 9  | 32,698,601  | 33,062,159  | 6 | 0 | 6 | 1 |
| Case 76 | 9  | 33,082,969  | 35,271,817  | 4 | 0 | 4 | 1 |
| Case 76 | 9  | 35,289,544  | 46,944,322  | 1 | 1 | 2 | 0 |
| Case 76 | 9  | 65,629,772  | 141,066,491 | 1 | 1 | 2 | 0 |
| Case 76 | 10 | 98,087      | 5,009,449   | 2 | 0 | 2 | 1 |
| Case 76 | 10 | 5,011,460   | 5,139,003   | 1 | 0 | 1 | 0 |
| Case 76 | 10 | 5,139,626   | 39,097,912  | 2 | 0 | 2 | 1 |
| Case 76 | 10 | 42,436,301  | 42,725,663  | 1 | 0 | 1 | 0 |
| Case 76 | 10 | 42,778,779  | 52,479,421  | 2 | 0 | 2 | 1 |
| Case 76 | 10 | 52,484,993  | 52,751,177  | 3 | 0 | 3 | 1 |
| Case 76 | 10 | 52,752,634  | 92,867,818  | 2 | 0 | 2 | 1 |
| Case 76 | 10 | 92,869,911  | 92,927,267  | 3 | 0 | 3 | 1 |
| Case 76 | 10 | 92,934,593  | 126,743,512 | 2 | 0 | 2 | 1 |
| Case 76 | 10 | 126,746,869 | 126,798,920 | 1 | 0 | 1 | 0 |
| Case 76 | 10 | 126,800,342 | 132,126,118 | 2 | 2 | 4 | 0 |
| Case 76 | 10 | 132,126,298 | 135,477,883 | 2 | 1 | 3 | 0 |
| Case 76 | 11 | 193,146     | 16,615,280  | 2 | 0 | 2 | 1 |
| Case 76 | 11 | 16,634,707  | 16,853,714  | 2 | 1 | 3 | 0 |
| Case 76 | 11 | 16,858,229  | 48,066,048  | 2 | 0 | 2 | 1 |
| Case 76 | 11 | 48,085,189  | 49,257,082  | 2 | 1 | 3 | 0 |
| Case 76 | 11 | 49,280,857  | 51,591,253  | 2 | 0 | 2 | 1 |
| Case 76 | 11 | 54,794,237  | 98,941,872  | 2 | 0 | 2 | 1 |
| Case 76 | 11 | 98,949,898  | 99,459,308  | 1 | 0 | 1 | 0 |
| Case 76 | 11 | 99,460,840  | 134,934,063 | 2 | 0 | 2 | 1 |
| Case 76 | 12 | 191,619     | 25,314,094  | 2 | 0 | 2 | 1 |
| Case 76 | 12 | 25,339,843  | 25,736,929  | 3 | 2 | 5 | 0 |
| Case 76 | 12 | 25,736,990  | 27,182,769  | 4 | 1 | 5 | 0 |
| Case 76 | 12 | 27,199,180  | 30,253,766  | 3 | 2 | 5 | 0 |
| Case 76 | 12 | 30,258,048  | 31,201,717  | 4 | 1 | 5 | 0 |
| Case 76 | 12 | 31,219,161  | 32,310,847  | 6 | 1 | 7 | 0 |
| Case 76 | 12 | 32,318,653  | 32,468,481  | 7 | 0 | 7 | 1 |
| Case 76 | 12 | 32,472,514  | 32,713,919  | 6 | 1 | 7 | 0 |
| Case 76 | 12 | 32,719,928  | 34,853,011  | 2 | 1 | 3 | 0 |
| Case 76 | 12 | 37,876,400  | 61,885,106  | 2 | 1 | 3 | 0 |
| Case 76 | 12 | 61,886,175  | 99,693,251  | 2 | 0 | 2 | 1 |

|         |    |             |             |   |   |   |   |
|---------|----|-------------|-------------|---|---|---|---|
| Case 76 | 12 | 99,703,812  | 100,063,310 | 1 | 0 | 1 | 0 |
| Case 76 | 12 | 100,073,472 | 104,720,179 | 2 | 0 | 2 | 1 |
| Case 76 | 12 | 104,730,846 | 125,669,216 | 2 | 1 | 3 | 0 |
| Case 76 | 12 | 125,681,761 | 125,797,855 | 2 | 0 | 2 | 1 |
| Case 76 | 12 | 125,801,751 | 133,810,935 | 2 | 1 | 3 | 0 |
| Case 76 | 13 | 19,058,717  | 41,004,833  | 3 | 2 | 5 | 0 |
| Case 76 | 13 | 41,006,763  | 41,340,992  | 2 | 2 | 4 | 0 |
| Case 76 | 13 | 41,341,137  | 42,838,908  | 3 | 2 | 5 | 0 |
| Case 76 | 13 | 42,847,434  | 51,245,376  | 2 | 0 | 2 | 1 |
| Case 76 | 13 | 51,247,210  | 82,983,494  | 3 | 2 | 5 | 0 |
| Case 76 | 13 | 82,986,268  | 95,731,736  | 4 | 0 | 4 | 1 |
| Case 76 | 13 | 95,731,768  | 115,103,529 | 3 | 0 | 3 | 1 |
| Case 76 | 14 | 19,280,733  | 23,395,991  | 2 | 1 | 3 | 0 |
| Case 76 | 14 | 23,397,336  | 53,162,133  | 1 | 1 | 2 | 0 |
| Case 76 | 14 | 53,168,000  | 53,224,593  | 2 | 1 | 3 | 0 |
| Case 76 | 14 | 53,235,651  | 107,287,663 | 1 | 1 | 2 | 0 |
| Case 76 | 15 | 20,034,919  | 81,178,263  | 2 | 0 | 2 | 1 |
| Case 76 | 15 | 81,179,553  | 94,205,530  | 5 | 0 | 5 | 1 |
| Case 76 | 15 | 94,211,856  | 98,903,587  | 6 | 0 | 6 | 1 |
| Case 76 | 15 | 98,903,655  | 102,461,162 | 5 | 0 | 5 | 1 |
| Case 76 | 16 | 88,165      | 6,523,142   | 2 | 0 | 2 | 1 |
| Case 76 | 16 | 6,523,482   | 6,581,321   | 1 | 0 | 1 | 0 |
| Case 76 | 16 | 6,581,335   | 8,513,277   | 2 | 0 | 2 | 1 |
| Case 76 | 16 | 8,515,905   | 9,433,864   | 2 | 1 | 3 | 0 |
| Case 76 | 16 | 9,434,959   | 10,322,037  | 2 | 0 | 2 | 1 |
| Case 76 | 16 | 10,324,147  | 12,848,389  | 2 | 1 | 3 | 0 |
| Case 76 | 16 | 12,850,671  | 13,897,364  | 2 | 0 | 2 | 1 |
| Case 76 | 16 | 13,897,896  | 14,395,158  | 2 | 1 | 3 | 0 |
| Case 76 | 16 | 14,395,432  | 15,501,701  | 2 | 0 | 2 | 1 |
| Case 76 | 16 | 15,512,575  | 17,843,026  | 2 | 1 | 3 | 0 |
| Case 76 | 16 | 17,845,571  | 35,285,582  | 2 | 0 | 2 | 1 |
| Case 76 | 16 | 46,450,037  | 68,690,591  | 2 | 1 | 3 | 0 |
| Case 76 | 16 | 68,698,461  | 90,274,695  | 2 | 0 | 2 | 1 |
| Case 76 | 17 | 11,885      | 11,597,310  | 2 | 0 | 2 | 1 |
| Case 76 | 17 | 11,599,798  | 12,048,276  | 1 | 0 | 1 | 0 |
| Case 76 | 17 | 12,049,697  | 22,242,355  | 2 | 0 | 2 | 1 |
| Case 76 | 17 | 25,268,142  | 25,346,692  | 2 | 0 | 2 | 1 |
| Case 76 | 17 | 25,350,029  | 40,656,043  | 2 | 1 | 3 | 0 |
| Case 76 | 17 | 40,658,657  | 40,761,279  | 1 | 1 | 2 | 0 |
| Case 76 | 17 | 40,763,386  | 48,042,856  | 2 | 1 | 3 | 0 |
| Case 76 | 17 | 48,045,438  | 48,149,445  | 3 | 1 | 4 | 0 |
| Case 76 | 17 | 48,149,503  | 51,975,256  | 2 | 1 | 3 | 0 |
| Case 76 | 17 | 51,976,462  | 52,679,090  | 2 | 0 | 2 | 1 |
| Case 76 | 17 | 52,697,573  | 67,109,662  | 2 | 1 | 3 | 0 |
| Case 76 | 17 | 67,109,673  | 67,161,107  | 1 | 0 | 1 | 0 |
| Case 76 | 17 | 67,169,500  | 70,454,391  | 2 | 1 | 3 | 0 |
| Case 76 | 17 | 70,460,351  | 70,533,218  | 1 | 1 | 2 | 0 |
| Case 76 | 17 | 70,534,472  | 81,060,040  | 2 | 1 | 3 | 0 |
| Case 76 | 18 | 87,505      | 1,159,778   | 2 | 0 | 2 | 1 |
| Case 76 | 18 | 1,167,872   | 1,635,748   | 3 | 0 | 3 | 1 |
| Case 76 | 18 | 1,636,726   | 3,171,473   | 4 | 0 | 4 | 1 |
| Case 76 | 18 | 3,173,950   | 3,316,176   | 2 | 0 | 2 | 1 |
| Case 76 | 18 | 3,319,380   | 3,839,680   | 1 | 0 | 1 | 0 |
| Case 76 | 18 | 3,839,896   | 6,371,311   | 2 | 0 | 2 | 1 |
| Case 76 | 18 | 6,376,918   | 6,468,735   | 4 | 0 | 4 | 1 |
| Case 76 | 18 | 6,474,496   | 6,662,650   | 3 | 0 | 3 | 1 |
| Case 76 | 18 | 6,666,204   | 7,697,053   | 4 | 0 | 4 | 1 |
| Case 76 | 18 | 7,704,830   | 8,386,122   | 2 | 0 | 2 | 1 |
| Case 76 | 18 | 8,387,195   | 8,620,323   | 1 | 0 | 1 | 0 |
| Case 76 | 18 | 8,621,430   | 9,006,277   | 2 | 0 | 2 | 1 |
| Case 76 | 18 | 9,009,311   | 9,107,815   | 2 | 2 | 4 | 0 |

|         |    |            |            |   |   |   |   |
|---------|----|------------|------------|---|---|---|---|
| Case 76 | 18 | 9,109,484  | 15,375,878 | 2 | 1 | 3 | 0 |
| Case 76 | 18 | 18,520,354 | 19,954,143 | 2 | 1 | 3 | 0 |
| Case 76 | 18 | 19,984,669 | 20,799,961 | 3 | 2 | 5 | 0 |
| Case 76 | 18 | 20,814,418 | 21,037,808 | 2 | 1 | 3 | 0 |
| Case 76 | 18 | 21,041,225 | 22,653,562 | 3 | 1 | 4 | 0 |
| Case 76 | 18 | 22,656,876 | 22,860,846 | 2 | 2 | 4 | 0 |
| Case 76 | 18 | 22,861,794 | 22,994,310 | 2 | 1 | 3 | 0 |
| Case 76 | 18 | 23,000,716 | 23,421,693 | 2 | 0 | 2 | 1 |
| Case 76 | 18 | 23,423,078 | 23,459,792 | 2 | 1 | 3 | 0 |
| Case 76 | 18 | 23,463,097 | 23,716,903 | 2 | 0 | 2 | 1 |
| Case 76 | 18 | 23,724,560 | 24,462,611 | 2 | 1 | 3 | 0 |
| Case 76 | 18 | 24,471,991 | 24,509,467 | 2 | 0 | 2 | 1 |
| Case 76 | 18 | 24,509,993 | 25,016,255 | 2 | 1 | 3 | 0 |
| Case 76 | 18 | 25,023,637 | 25,978,719 | 2 | 0 | 2 | 1 |
| Case 76 | 18 | 26,010,927 | 28,734,765 | 2 | 2 | 4 | 0 |
| Case 76 | 18 | 28,737,160 | 28,828,139 | 2 | 1 | 3 | 0 |
| Case 76 | 18 | 28,832,838 | 29,426,774 | 2 | 2 | 4 | 0 |
| Case 76 | 18 | 29,429,596 | 33,145,747 | 3 | 2 | 5 | 0 |
| Case 76 | 18 | 33,152,621 | 33,625,370 | 2 | 2 | 4 | 0 |
| Case 76 | 18 | 33,635,683 | 34,220,737 | 3 | 1 | 4 | 0 |
| Case 76 | 18 | 34,223,566 | 34,310,709 | 3 | 2 | 5 | 0 |
| Case 76 | 18 | 34,311,643 | 35,534,040 | 2 | 1 | 3 | 0 |
| Case 76 | 18 | 35,535,315 | 42,741,032 | 2 | 2 | 4 | 0 |
| Case 76 | 18 | 42,741,986 | 45,155,501 | 2 | 1 | 3 | 0 |
| Case 76 | 18 | 45,157,181 | 46,298,707 | 3 | 1 | 4 | 0 |
| Case 76 | 18 | 46,303,400 | 46,770,186 | 2 | 2 | 4 | 0 |
| Case 76 | 18 | 46,786,058 | 47,243,912 | 3 | 1 | 4 | 0 |
| Case 76 | 18 | 47,249,297 | 47,638,056 | 2 | 1 | 3 | 0 |
| Case 76 | 18 | 47,638,496 | 47,992,400 | 3 | 1 | 4 | 0 |
| Case 76 | 18 | 47,993,844 | 48,218,823 | 2 | 1 | 3 | 0 |
| Case 76 | 18 | 48,220,529 | 78,015,180 | 2 | 0 | 2 | 1 |
| Case 76 | 19 | 260,912    | 441,243    | 0 | 0 | 0 | 0 |
| Case 76 | 19 | 446,887    | 21,393,187 | 2 | 0 | 2 | 1 |
| Case 76 | 19 | 21,419,141 | 24,629,285 | 2 | 1 | 3 | 0 |
| Case 76 | 19 | 27,732,159 | 40,199,948 | 2 | 1 | 3 | 0 |
| Case 76 | 19 | 40,217,794 | 40,237,360 | 1 | 1 | 2 | 0 |
| Case 76 | 19 | 40,240,034 | 58,194,388 | 2 | 1 | 3 | 0 |
| Case 76 | 19 | 58,194,405 | 59,097,160 | 2 | 2 | 4 | 0 |
| Case 76 | 20 | 63,244     | 5,727,600  | 2 | 1 | 3 | 0 |
| Case 76 | 20 | 5,728,237  | 5,890,360  | 5 | 0 | 5 | 1 |
| Case 76 | 20 | 5,892,853  | 5,904,558  | 4 | 0 | 4 | 1 |
| Case 76 | 20 | 5,905,779  | 6,736,189  | 5 | 0 | 5 | 1 |
| Case 76 | 20 | 6,736,901  | 8,238,806  | 6 | 0 | 6 | 1 |
| Case 76 | 20 | 8,247,326  | 14,620,991 | 5 | 0 | 5 | 1 |
| Case 76 | 20 | 14,630,445 | 14,714,457 | 5 | 1 | 6 | 0 |
| Case 76 | 20 | 14,719,049 | 14,847,907 | 4 | 1 | 5 | 0 |
| Case 76 | 20 | 14,853,050 | 15,135,938 | 1 | 0 | 1 | 0 |
| Case 76 | 20 | 15,139,048 | 15,404,445 | 4 | 1 | 5 | 0 |
| Case 76 | 20 | 15,406,124 | 15,654,842 | 5 | 1 | 6 | 0 |
| Case 76 | 20 | 15,655,604 | 16,009,257 | 4 | 1 | 5 | 0 |
| Case 76 | 20 | 16,014,926 | 22,963,855 | 5 | 0 | 5 | 1 |
| Case 76 | 20 | 22,964,954 | 26,293,985 | 4 | 0 | 4 | 1 |
| Case 76 | 20 | 29,425,357 | 37,873,813 | 4 | 0 | 4 | 1 |
| Case 76 | 20 | 37,876,772 | 47,801,157 | 5 | 0 | 5 | 1 |
| Case 76 | 20 | 47,806,334 | 50,546,891 | 4 | 0 | 4 | 1 |
| Case 76 | 20 | 50,548,297 | 51,645,136 | 5 | 0 | 5 | 1 |
| Case 76 | 20 | 51,646,799 | 52,814,510 | 4 | 0 | 4 | 1 |
| Case 76 | 20 | 52,815,780 | 54,489,899 | 5 | 1 | 6 | 0 |
| Case 76 | 20 | 54,490,006 | 62,948,788 | 4 | 0 | 4 | 1 |
| Case 76 | 21 | 10,827,533 | 10,971,337 | 1 | 1 | 2 | 0 |
| Case 76 | 21 | 14,368,320 | 32,972,257 | 1 | 1 | 2 | 0 |



|         |    |             |             |   |   |   |   |
|---------|----|-------------|-------------|---|---|---|---|
| Case 76 | 21 | 32,975,321  | 33,078,925  | 1 | 0 | 1 | 0 |
| Case 76 | 21 | 33,080,313  | 47,954,567  | 1 | 1 | 2 | 0 |
| Case 76 | 21 | 47,954,727  | 48,100,155  | 2 | 0 | 2 | 1 |
| Case 76 | 22 | 16,114,244  | 34,152,899  | 3 | 0 | 3 | 1 |
| Case 76 | 22 | 34,153,395  | 34,194,745  | 2 | 0 | 2 | 1 |
| Case 76 | 22 | 34,196,626  | 34,212,294  | 3 | 0 | 3 | 1 |
| Case 76 | 22 | 34,215,782  | 34,260,738  | 1 | 0 | 1 | 0 |
| Case 76 | 22 | 34,263,325  | 42,274,287  | 3 | 0 | 3 | 1 |
| Case 76 | 22 | 42,276,724  | 42,611,265  | 2 | 0 | 2 | 1 |
| Case 76 | 22 | 42,612,297  | 47,032,086  | 3 | 0 | 3 | 1 |
| Case 76 | 22 | 47,034,838  | 51,195,728  | 2 | 0 | 2 | 1 |
| Case 76 | X  | 2,700,157   | 6,995,417   | 2 | 0 | 2 | 1 |
| Case 76 | X  | 7,007,959   | 7,598,977   | 0 | 0 | 0 | 0 |
| Case 76 | X  | 7,685,262   | 22,969,544  | 2 | 0 | 2 | 1 |
| Case 76 | X  | 22,975,385  | 22,996,273  | 0 | 0 | 0 | 0 |
| Case 76 | X  | 22,996,902  | 58,488,110  | 2 | 0 | 2 | 1 |
| Case 76 | X  | 61,694,576  | 154,898,561 | 2 | 0 | 2 | 1 |
| Case 77 | 1  | 82,154      | 6,411,024   | 2 | 1 | 3 | 0 |
| Case 77 | 1  | 6,414,084   | 6,578,685   | 2 | 2 | 4 | 0 |
| Case 77 | 1  | 6,579,607   | 87,085,266  | 2 | 1 | 3 | 0 |
| Case 77 | 1  | 87,098,109  | 87,259,306  | 4 | 1 | 5 | 0 |
| Case 77 | 1  | 87,277,974  | 121,346,616 | 2 | 1 | 3 | 0 |
| Case 77 | 1  | 142,649,718 | 182,973,024 | 3 | 1 | 4 | 0 |
| Case 77 | 1  | 182,973,491 | 183,404,466 | 2 | 1 | 3 | 0 |
| Case 77 | 1  | 183,415,318 | 183,559,704 | 1 | 1 | 2 | 0 |
| Case 77 | 1  | 183,561,560 | 204,438,643 | 2 | 1 | 3 | 0 |
| Case 77 | 1  | 204,438,708 | 226,292,385 | 2 | 0 | 2 | 1 |
| Case 77 | 1  | 226,292,585 | 234,909,298 | 2 | 1 | 3 | 0 |
| Case 77 | 1  | 234,956,342 | 235,072,837 | 4 | 1 | 5 | 0 |
| Case 77 | 1  | 235,075,929 | 249,218,992 | 2 | 1 | 3 | 0 |
| Case 77 | 2  | 18,674      | 42,165,462  | 2 | 1 | 3 | 0 |
| Case 77 | 2  | 42,171,309  | 42,373,747  | 4 | 1 | 5 | 0 |
| Case 77 | 2  | 42,398,473  | 58,765,789  | 3 | 1 | 4 | 0 |
| Case 77 | 2  | 58,767,826  | 92,081,640  | 2 | 1 | 3 | 0 |
| Case 77 | 2  | 95,429,424  | 169,498,986 | 2 | 1 | 3 | 0 |
| Case 77 | 2  | 169,501,848 | 173,121,662 | 1 | 1 | 2 | 0 |
| Case 77 | 2  | 173,124,183 | 173,338,939 | 2 | 1 | 3 | 0 |
| Case 77 | 2  | 173,339,808 | 242,738,488 | 1 | 1 | 2 | 0 |
| Case 77 | 2  | 242,741,222 | 242,873,800 | 2 | 1 | 3 | 0 |
| Case 77 | 2  | 242,917,734 | 243,048,760 | 1 | 1 | 2 | 0 |
| Case 77 | 3  | 61,495      | 22,037,999  | 2 | 1 | 3 | 0 |
| Case 77 | 3  | 22,038,439  | 59,789,058  | 1 | 1 | 2 | 0 |
| Case 77 | 3  | 59,789,614  | 60,040,105  | 1 | 0 | 1 | 0 |
| Case 77 | 3  | 60,047,076  | 64,069,310  | 1 | 1 | 2 | 0 |
| Case 77 | 3  | 64,072,378  | 64,287,248  | 1 | 0 | 1 | 0 |
| Case 77 | 3  | 64,289,354  | 90,442,925  | 1 | 1 | 2 | 0 |
| Case 77 | 3  | 93,537,290  | 143,405,698 | 1 | 1 | 2 | 0 |
| Case 77 | 3  | 143,409,272 | 143,422,775 | 1 | 0 | 1 | 0 |
| Case 77 | 3  | 143,427,040 | 167,208,012 | 1 | 1 | 2 | 0 |
| Case 77 | 3  | 167,212,340 | 172,701,596 | 2 | 1 | 3 | 0 |
| Case 77 | 3  | 172,712,890 | 185,643,454 | 1 | 1 | 2 | 0 |
| Case 77 | 3  | 185,652,184 | 190,671,328 | 2 | 1 | 3 | 0 |
| Case 77 | 3  | 190,682,313 | 193,444,413 | 1 | 1 | 2 | 0 |
| Case 77 | 3  | 193,449,406 | 193,801,183 | 2 | 1 | 3 | 0 |
| Case 77 | 3  | 193,806,588 | 197,838,262 | 1 | 1 | 2 | 0 |
| Case 77 | 4  | 71,566      | 25,750,135  | 2 | 0 | 2 | 1 |
| Case 77 | 4  | 25,750,145  | 25,771,973  | 1 | 0 | 1 | 0 |
| Case 77 | 4  | 25,772,477  | 49,620,898  | 2 | 0 | 2 | 1 |
| Case 77 | 4  | 52,697,856  | 94,727,622  | 2 | 0 | 2 | 1 |
| Case 77 | 4  | 94,729,848  | 94,739,787  | 3 | 1 | 4 | 0 |
| Case 77 | 4  | 94,741,522  | 190,963,766 | 2 | 0 | 2 | 1 |

|         |   |             |             |   |   |   |   |
|---------|---|-------------|-------------|---|---|---|---|
| Case 77 | 5 | 38,139      | 30,393,124  | 3 | 0 | 3 | 1 |
| Case 77 | 5 | 30,395,852  | 30,536,972  | 4 | 0 | 4 | 1 |
| Case 77 | 5 | 30,552,961  | 45,755,115  | 3 | 0 | 3 | 1 |
| Case 77 | 5 | 45,757,305  | 46,399,093  | 1 | 0 | 1 | 0 |
| Case 77 | 5 | 49,457,282  | 49,597,497  | 1 | 0 | 1 | 0 |
| Case 77 | 5 | 49,614,318  | 70,704,077  | 2 | 0 | 2 | 1 |
| Case 77 | 5 | 70,709,459  | 73,048,932  | 3 | 0 | 3 | 1 |
| Case 77 | 5 | 73,052,741  | 73,153,979  | 1 | 0 | 1 | 0 |
| Case 77 | 5 | 73,159,098  | 95,548,515  | 3 | 0 | 3 | 1 |
| Case 77 | 5 | 95,554,891  | 95,965,857  | 5 | 0 | 5 | 1 |
| Case 77 | 5 | 95,969,322  | 165,798,321 | 3 | 0 | 3 | 1 |
| Case 77 | 5 | 165,800,113 | 165,844,724 | 2 | 0 | 2 | 1 |
| Case 77 | 5 | 165,847,422 | 176,691,279 | 3 | 0 | 3 | 1 |
| Case 77 | 5 | 176,700,885 | 176,886,119 | 5 | 0 | 5 | 1 |
| Case 77 | 5 | 176,886,179 | 180,693,127 | 3 | 0 | 3 | 1 |
| Case 77 | 6 | 108,666     | 1,760,556   | 3 | 0 | 3 | 1 |
| Case 77 | 6 | 1,763,561   | 2,190,846   | 2 | 0 | 2 | 1 |
| Case 77 | 6 | 2,199,634   | 6,882,117   | 3 | 0 | 3 | 1 |
| Case 77 | 6 | 6,883,618   | 7,920,904   | 2 | 2 | 4 | 0 |
| Case 77 | 6 | 7,924,658   | 10,179,366  | 3 | 2 | 5 | 0 |
| Case 77 | 6 | 10,179,707  | 12,173,922  | 2 | 2 | 4 | 0 |
| Case 77 | 6 | 12,174,132  | 12,709,009  | 3 | 2 | 5 | 0 |
| Case 77 | 6 | 12,712,516  | 13,870,749  | 3 | 1 | 4 | 0 |
| Case 77 | 6 | 13,877,123  | 32,569,687  | 2 | 1 | 3 | 0 |
| Case 77 | 6 | 32,570,839  | 32,602,269  | 3 | 1 | 4 | 0 |
| Case 77 | 6 | 32,602,482  | 58,752,089  | 2 | 1 | 3 | 0 |
| Case 77 | 6 | 61,891,118  | 62,249,159  | 2 | 1 | 3 | 0 |
| Case 77 | 6 | 62,272,667  | 91,682,316  | 3 | 1 | 4 | 0 |
| Case 77 | 6 | 91,683,972  | 91,714,276  | 1 | 0 | 1 | 0 |
| Case 77 | 6 | 91,717,296  | 101,594,795 | 3 | 1 | 4 | 0 |
| Case 77 | 6 | 101,598,363 | 111,214,240 | 2 | 1 | 3 | 0 |
| Case 77 | 6 | 111,219,973 | 111,324,495 | 1 | 1 | 2 | 0 |
| Case 77 | 6 | 111,335,687 | 125,107,056 | 2 | 1 | 3 | 0 |
| Case 77 | 6 | 125,108,969 | 132,603,042 | 3 | 1 | 4 | 0 |
| Case 77 | 6 | 132,611,762 | 147,819,598 | 2 | 1 | 3 | 0 |
| Case 77 | 6 | 147,822,074 | 147,968,492 | 2 | 0 | 2 | 1 |
| Case 77 | 6 | 147,971,574 | 170,980,171 | 2 | 1 | 3 | 0 |
| Case 77 | 7 | 44,935      | 10,368,887  | 2 | 1 | 3 | 0 |
| Case 77 | 7 | 10,383,334  | 37,626,839  | 2 | 0 | 2 | 1 |
| Case 77 | 7 | 37,663,495  | 38,297,145  | 2 | 1 | 3 | 0 |
| Case 77 | 7 | 38,298,285  | 38,358,412  | 3 | 2 | 5 | 0 |
| Case 77 | 7 | 38,358,956  | 57,878,853  | 2 | 1 | 3 | 0 |
| Case 77 | 7 | 57,882,950  | 58,019,061  | 1 | 0 | 1 | 0 |
| Case 77 | 7 | 61,056,053  | 62,479,327  | 1 | 0 | 1 | 0 |
| Case 77 | 7 | 62,510,311  | 103,207,234 | 2 | 1 | 3 | 0 |
| Case 77 | 7 | 103,209,028 | 103,549,724 | 3 | 1 | 4 | 0 |
| Case 77 | 7 | 103,555,270 | 159,119,486 | 2 | 1 | 3 | 0 |
| Case 77 | 8 | 164,984     | 16,336,416  | 2 | 0 | 2 | 1 |
| Case 77 | 8 | 16,337,635  | 29,250,546  | 1 | 0 | 1 | 0 |
| Case 77 | 8 | 29,253,667  | 29,451,488  | 3 | 0 | 3 | 1 |
| Case 77 | 8 | 29,453,239  | 40,831,222  | 1 | 0 | 1 | 0 |
| Case 77 | 8 | 40,831,294  | 43,791,691  | 2 | 0 | 2 | 1 |
| Case 77 | 8 | 46,886,735  | 46,886,735  | 2 | 0 | 2 | 1 |
| Case 77 | 8 | 46,942,842  | 51,780,761  | 5 | 0 | 5 | 1 |
| Case 77 | 8 | 51,785,729  | 60,042,160  | 4 | 0 | 4 | 1 |
| Case 77 | 8 | 60,046,126  | 70,981,311  | 3 | 0 | 3 | 1 |
| Case 77 | 8 | 70,981,442  | 75,494,355  | 4 | 0 | 4 | 1 |
| Case 77 | 8 | 75,513,134  | 75,584,319  | 7 | 0 | 7 | 1 |
| Case 77 | 8 | 75,599,357  | 127,822,685 | 4 | 0 | 4 | 1 |
| Case 77 | 8 | 127,827,431 | 128,340,908 | 6 | 0 | 6 | 1 |
| Case 77 | 8 | 128,341,680 | 128,356,226 | 9 | 0 | 9 | 1 |

|         |    |             |             |    |   |    |   |
|---------|----|-------------|-------------|----|---|----|---|
| Case 77 | 8  | 128,364,973 | 146,293,414 | 5  | 0 | 5  | 1 |
| Case 77 | 9  | 46,587      | 33,192,940  | 2  | 2 | 4  | 0 |
| Case 77 | 9  | 33,193,935  | 33,218,297  | 4  | 2 | 6  | 0 |
| Case 77 | 9  | 33,218,668  | 33,313,696  | 3  | 2 | 5  | 0 |
| Case 77 | 9  | 33,318,728  | 46,944,322  | 2  | 2 | 4  | 0 |
| Case 77 | 9  | 65,629,772  | 71,253,821  | 3  | 1 | 4  | 0 |
| Case 77 | 9  | 71,253,918  | 90,067,655  | 4  | 0 | 4  | 1 |
| Case 77 | 9  | 90,068,509  | 90,835,589  | 3  | 0 | 3  | 1 |
| Case 77 | 9  | 90,835,726  | 116,704,466 | 4  | 0 | 4  | 1 |
| Case 77 | 9  | 116,708,823 | 128,083,731 | 3  | 0 | 3  | 1 |
| Case 77 | 9  | 128,086,101 | 132,597,021 | 2  | 0 | 2  | 1 |
| Case 77 | 9  | 132,601,229 | 139,522,101 | 4  | 0 | 4  | 1 |
| Case 77 | 9  | 139,526,086 | 140,587,156 | 5  | 0 | 5  | 1 |
| Case 77 | 9  | 140,601,645 | 141,066,491 | 4  | 0 | 4  | 1 |
| Case 77 | 10 | 98,087      | 5,751,644   | 2  | 2 | 4  | 0 |
| Case 77 | 10 | 5,759,801   | 7,412,879   | 2  | 1 | 3  | 0 |
| Case 77 | 10 | 7,415,774   | 21,414,816  | 2  | 2 | 4  | 0 |
| Case 77 | 10 | 21,414,892  | 21,568,947  | 3  | 2 | 5  | 0 |
| Case 77 | 10 | 21,569,443  | 24,207,529  | 2  | 2 | 4  | 0 |
| Case 77 | 10 | 24,215,163  | 37,084,210  | 2  | 1 | 3  | 0 |
| Case 77 | 10 | 37,093,820  | 39,097,912  | 2  | 2 | 4  | 0 |
| Case 77 | 10 | 42,436,301  | 60,961,915  | 2  | 2 | 4  | 0 |
| Case 77 | 10 | 60,966,706  | 62,664,755  | 5  | 1 | 6  | 0 |
| Case 77 | 10 | 62,665,460  | 63,648,027  | 4  | 2 | 6  | 0 |
| Case 77 | 10 | 63,649,483  | 67,488,312  | 4  | 0 | 4  | 1 |
| Case 77 | 10 | 67,495,478  | 67,898,109  | 8  | 0 | 8  | 1 |
| Case 77 | 10 | 67,899,266  | 75,937,554  | 5  | 0 | 5  | 1 |
| Case 77 | 10 | 75,940,906  | 76,481,311  | 6  | 0 | 6  | 1 |
| Case 77 | 10 | 76,498,150  | 84,099,660  | 5  | 0 | 5  | 1 |
| Case 77 | 10 | 84,100,509  | 85,074,636  | 6  | 0 | 6  | 1 |
| Case 77 | 10 | 85,085,640  | 91,181,853  | 1  | 0 | 1  | 0 |
| Case 77 | 10 | 91,185,696  | 97,266,538  | 2  | 1 | 3  | 0 |
| Case 77 | 10 | 97,266,574  | 97,487,362  | 2  | 2 | 4  | 0 |
| Case 77 | 10 | 97,496,989  | 135,477,883 | 2  | 1 | 3  | 0 |
| Case 77 | 11 | 193,146     | 26,070,407  | 2  | 0 | 2  | 1 |
| Case 77 | 11 | 26,079,373  | 28,549,266  | 2  | 1 | 3  | 0 |
| Case 77 | 11 | 28,575,986  | 30,613,825  | 2  | 2 | 4  | 0 |
| Case 77 | 11 | 30,618,816  | 31,793,051  | 5  | 2 | 7  | 0 |
| Case 77 | 11 | 31,796,560  | 32,249,249  | 9  | 1 | 10 | 0 |
| Case 77 | 11 | 32,251,787  | 34,456,188  | 11 | 0 | 11 | 1 |
| Case 77 | 11 | 34,457,654  | 34,490,385  | 16 | 0 | 16 | 1 |
| Case 77 | 11 | 34,490,537  | 36,041,260  | 12 | 0 | 12 | 1 |
| Case 77 | 11 | 36,041,753  | 36,983,798  | 10 | 0 | 10 | 1 |
| Case 77 | 11 | 36,985,037  | 37,205,935  | 14 | 0 | 14 | 1 |
| Case 77 | 11 | 37,217,499  | 39,410,325  | 10 | 1 | 11 | 0 |
| Case 77 | 11 | 39,424,358  | 39,916,430  | 7  | 1 | 8  | 0 |
| Case 77 | 11 | 39,924,543  | 41,280,710  | 5  | 1 | 6  | 0 |
| Case 77 | 11 | 41,284,958  | 42,246,718  | 7  | 1 | 8  | 0 |
| Case 77 | 11 | 42,247,461  | 43,689,610  | 4  | 1 | 5  | 0 |
| Case 77 | 11 | 43,694,016  | 44,375,944  | 6  | 1 | 7  | 0 |
| Case 77 | 11 | 44,378,010  | 45,401,413  | 8  | 1 | 9  | 0 |
| Case 77 | 11 | 45,403,404  | 45,706,162  | 6  | 1 | 7  | 0 |
| Case 77 | 11 | 45,706,453  | 48,556,387  | 4  | 1 | 5  | 0 |
| Case 77 | 11 | 48,558,249  | 49,325,425  | 5  | 2 | 7  | 0 |
| Case 77 | 11 | 49,357,043  | 50,008,258  | 2  | 2 | 4  | 0 |
| Case 77 | 11 | 50,057,854  | 50,345,592  | 4  | 2 | 6  | 0 |
| Case 77 | 11 | 50,349,310  | 50,697,498  | 7  | 2 | 9  | 0 |
| Case 77 | 11 | 51,095,992  | 51,591,253  | 3  | 1 | 4  | 0 |
| Case 77 | 11 | 54,794,237  | 55,685,767  | 2  | 1 | 3  | 0 |
| Case 77 | 11 | 55,686,109  | 125,836,330 | 2  | 0 | 2  | 1 |
| Case 77 | 11 | 125,839,764 | 127,232,888 | 2  | 1 | 3  | 0 |

|         |    |             |             |   |   |   |   |
|---------|----|-------------|-------------|---|---|---|---|
| Case 77 | 11 | 127,241,251 | 134,934,063 | 2 | 0 | 2 | 1 |
| Case 77 | 12 | 191,619     | 4,139,900   | 2 | 2 | 4 | 0 |
| Case 77 | 12 | 4,141,091   | 21,064,348  | 2 | 0 | 2 | 1 |
| Case 77 | 12 | 21,068,337  | 30,404,634  | 2 | 2 | 4 | 0 |
| Case 77 | 12 | 30,407,028  | 34,853,011  | 2 | 1 | 3 | 0 |
| Case 77 | 12 | 37,876,400  | 38,457,549  | 2 | 1 | 3 | 0 |
| Case 77 | 12 | 38,472,919  | 43,521,414  | 2 | 2 | 4 | 0 |
| Case 77 | 12 | 43,526,472  | 55,732,963  | 2 | 0 | 2 | 1 |
| Case 77 | 12 | 55,737,318  | 61,905,997  | 2 | 1 | 3 | 0 |
| Case 77 | 12 | 61,906,480  | 67,213,725  | 2 | 2 | 4 | 0 |
| Case 77 | 12 | 67,215,122  | 85,995,733  | 2 | 0 | 2 | 1 |
| Case 77 | 12 | 85,998,475  | 86,198,535  | 2 | 2 | 4 | 0 |
| Case 77 | 12 | 86,198,731  | 94,471,246  | 2 | 1 | 3 | 0 |
| Case 77 | 12 | 94,475,767  | 94,500,590  | 3 | 1 | 4 | 0 |
| Case 77 | 12 | 94,502,584  | 97,175,658  | 2 | 1 | 3 | 0 |
| Case 77 | 12 | 97,186,242  | 97,529,985  | 1 | 0 | 1 | 0 |
| Case 77 | 12 | 97,538,337  | 101,843,240 | 2 | 1 | 3 | 0 |
| Case 77 | 12 | 101,846,299 | 102,119,978 | 2 | 2 | 4 | 0 |
| Case 77 | 12 | 102,120,099 | 133,810,935 | 2 | 1 | 3 | 0 |
| Case 77 | 13 | 19,058,717  | 23,416,203  | 2 | 1 | 3 | 0 |
| Case 77 | 13 | 23,422,753  | 34,425,976  | 2 | 2 | 4 | 0 |
| Case 77 | 13 | 34,438,786  | 37,102,756  | 3 | 2 | 5 | 0 |
| Case 77 | 13 | 37,104,855  | 48,987,032  | 2 | 1 | 3 | 0 |
| Case 77 | 13 | 48,992,810  | 53,536,175  | 2 | 0 | 2 | 1 |
| Case 77 | 13 | 53,537,171  | 53,677,679  | 5 | 0 | 5 | 1 |
| Case 77 | 13 | 53,684,255  | 58,103,071  | 3 | 0 | 3 | 1 |
| Case 77 | 13 | 58,125,284  | 58,675,299  | 3 | 1 | 4 | 0 |
| Case 77 | 13 | 58,688,382  | 62,961,324  | 3 | 0 | 3 | 1 |
| Case 77 | 13 | 62,972,766  | 73,647,360  | 3 | 1 | 4 | 0 |
| Case 77 | 13 | 73,649,333  | 74,001,257  | 3 | 2 | 5 | 0 |
| Case 77 | 13 | 74,010,099  | 112,603,700 | 3 | 1 | 4 | 0 |
| Case 77 | 13 | 112,604,790 | 112,654,779 | 4 | 1 | 5 | 0 |
| Case 77 | 13 | 112,656,719 | 115,103,529 | 3 | 1 | 4 | 0 |
| Case 77 | 14 | 19,280,733  | 22,429,647  | 3 | 0 | 3 | 1 |
| Case 77 | 14 | 22,433,866  | 23,006,908  | 4 | 0 | 4 | 1 |
| Case 77 | 14 | 23,009,999  | 48,400,975  | 3 | 0 | 3 | 1 |
| Case 77 | 14 | 48,413,039  | 48,578,411  | 7 | 1 | 8 | 0 |
| Case 77 | 14 | 48,580,527  | 107,287,663 | 3 | 0 | 3 | 1 |
| Case 77 | 15 | 20,034,919  | 35,509,148  | 2 | 0 | 2 | 1 |
| Case 77 | 15 | 35,516,110  | 35,751,871  | 1 | 0 | 1 | 0 |
| Case 77 | 15 | 35,757,960  | 91,345,348  | 2 | 0 | 2 | 1 |
| Case 77 | 15 | 91,346,789  | 91,496,908  | 4 | 0 | 4 | 1 |
| Case 77 | 15 | 91,498,246  | 102,461,162 | 2 | 0 | 2 | 1 |
| Case 77 | 16 | 88,165      | 5,437,297   | 2 | 0 | 2 | 1 |
| Case 77 | 16 | 5,440,759   | 5,887,312   | 3 | 0 | 3 | 1 |
| Case 77 | 16 | 5,890,175   | 10,975,311  | 2 | 0 | 2 | 1 |
| Case 77 | 16 | 10,979,440  | 11,000,866  | 1 | 0 | 1 | 0 |
| Case 77 | 16 | 11,000,940  | 29,412,503  | 2 | 0 | 2 | 1 |
| Case 77 | 16 | 29,595,483  | 31,545,618  | 4 | 0 | 4 | 1 |
| Case 77 | 16 | 31,563,658  | 35,285,582  | 2 | 0 | 2 | 1 |
| Case 77 | 16 | 46,450,037  | 66,480,429  | 3 | 0 | 3 | 1 |
| Case 77 | 16 | 66,483,806  | 90,274,695  | 2 | 0 | 2 | 1 |
| Case 77 | 17 | 11,885      | 4,067,552   | 2 | 0 | 2 | 1 |
| Case 77 | 17 | 4,069,735   | 4,113,150   | 1 | 0 | 1 | 0 |
| Case 77 | 17 | 4,120,380   | 6,857,535   | 2 | 0 | 2 | 1 |
| Case 77 | 17 | 6,858,240   | 6,889,557   | 1 | 0 | 1 | 0 |
| Case 77 | 17 | 6,898,897   | 21,528,062  | 2 | 0 | 2 | 1 |
| Case 77 | 17 | 21,539,613  | 22,242,355  | 2 | 2 | 4 | 0 |
| Case 77 | 17 | 25,268,142  | 29,421,200  | 2 | 2 | 4 | 0 |
| Case 77 | 17 | 29,421,869  | 34,436,532  | 2 | 1 | 3 | 0 |
| Case 77 | 17 | 34,436,708  | 34,466,631  | 4 | 2 | 6 | 0 |

|         |    |             |             |   |   |   |   |
|---------|----|-------------|-------------|---|---|---|---|
| Case 77 | 17 | 34,468,886  | 63,563,281  | 2 | 1 | 3 | 0 |
| Case 77 | 17 | 63,564,505  | 63,822,357  | 2 | 2 | 4 | 0 |
| Case 77 | 17 | 63,841,571  | 81,060,040  | 2 | 1 | 3 | 0 |
| Case 77 | 18 | 87,505      | 14,253,537  | 3 | 0 | 3 | 1 |
| Case 77 | 18 | 14,265,834  | 15,375,878  | 2 | 0 | 2 | 1 |
| Case 77 | 18 | 18,520,354  | 28,683,238  | 2 | 0 | 2 | 1 |
| Case 77 | 18 | 28,689,144  | 55,464,523  | 3 | 0 | 3 | 1 |
| Case 77 | 18 | 55,466,596  | 55,732,192  | 5 | 0 | 5 | 1 |
| Case 77 | 18 | 55,740,404  | 68,459,549  | 3 | 0 | 3 | 1 |
| Case 77 | 18 | 68,460,065  | 78,015,180  | 2 | 0 | 2 | 1 |
| Case 77 | 19 | 260,912     | 998,126     | 2 | 1 | 3 | 0 |
| Case 77 | 19 | 1,002,847   | 1,990,174   | 2 | 0 | 2 | 1 |
| Case 77 | 19 | 1,990,769   | 2,050,823   | 3 | 0 | 3 | 1 |
| Case 77 | 19 | 2,057,907   | 10,416,617  | 2 | 0 | 2 | 1 |
| Case 77 | 19 | 10,419,130  | 18,450,713  | 2 | 1 | 3 | 0 |
| Case 77 | 19 | 18,453,124  | 18,517,767  | 1 | 0 | 1 | 0 |
| Case 77 | 19 | 18,533,642  | 24,629,285  | 2 | 1 | 3 | 0 |
| Case 77 | 19 | 27,732,159  | 28,991,292  | 2 | 1 | 3 | 0 |
| Case 77 | 19 | 28,993,359  | 35,923,858  | 2 | 2 | 4 | 0 |
| Case 77 | 19 | 35,926,220  | 38,138,887  | 2 | 1 | 3 | 0 |
| Case 77 | 19 | 38,139,488  | 38,525,798  | 2 | 2 | 4 | 0 |
| Case 77 | 19 | 38,539,988  | 41,319,116  | 2 | 1 | 3 | 0 |
| Case 77 | 19 | 41,324,684  | 41,382,476  | 0 | 0 | 0 | 0 |
| Case 77 | 19 | 41,383,115  | 45,043,644  | 2 | 2 | 4 | 0 |
| Case 77 | 19 | 45,046,352  | 45,097,027  | 3 | 2 | 5 | 0 |
| Case 77 | 19 | 45,098,425  | 51,263,296  | 2 | 1 | 3 | 0 |
| Case 77 | 19 | 51,263,432  | 52,434,706  | 2 | 2 | 4 | 0 |
| Case 77 | 19 | 52,437,588  | 53,481,147  | 2 | 1 | 3 | 0 |
| Case 77 | 19 | 53,482,629  | 53,505,812  | 3 | 2 | 5 | 0 |
| Case 77 | 19 | 53,505,860  | 59,097,160  | 2 | 1 | 3 | 0 |
| Case 77 | 20 | 63,244      | 6,134,885   | 4 | 0 | 4 | 1 |
| Case 77 | 20 | 6,137,310   | 14,807,599  | 4 | 1 | 5 | 0 |
| Case 77 | 20 | 14,814,090  | 15,083,626  | 1 | 0 | 1 | 0 |
| Case 77 | 20 | 15,085,205  | 15,160,752  | 2 | 1 | 3 | 0 |
| Case 77 | 20 | 15,161,670  | 22,249,187  | 3 | 1 | 4 | 0 |
| Case 77 | 20 | 22,252,275  | 23,016,706  | 4 | 1 | 5 | 0 |
| Case 77 | 20 | 23,016,757  | 26,293,985  | 3 | 1 | 4 | 0 |
| Case 77 | 20 | 29,425,357  | 50,040,086  | 3 | 1 | 4 | 0 |
| Case 77 | 20 | 50,040,870  | 50,153,344  | 4 | 0 | 4 | 1 |
| Case 77 | 20 | 50,155,124  | 53,393,214  | 3 | 1 | 4 | 0 |
| Case 77 | 20 | 53,396,897  | 56,453,291  | 1 | 1 | 2 | 0 |
| Case 77 | 20 | 56,460,394  | 60,928,231  | 3 | 1 | 4 | 0 |
| Case 77 | 20 | 60,928,304  | 61,019,224  | 4 | 0 | 4 | 1 |
| Case 77 | 20 | 61,024,062  | 62,948,788  | 3 | 1 | 4 | 0 |
| Case 77 | 21 | 10,827,533  | 10,971,337  | 2 | 1 | 3 | 0 |
| Case 77 | 21 | 14,368,320  | 48,100,155  | 2 | 1 | 3 | 0 |
| Case 77 | 22 | 16,114,244  | 51,195,728  | 2 | 0 | 2 | 1 |
| Case 77 | X  | 2,700,157   | 58,488,110  | 1 | 0 | 1 | 0 |
| Case 77 | X  | 61,694,576  | 154,898,561 | 1 | 0 | 1 | 0 |
| Case 78 | 1  | 82,154      | 121,346,616 | 1 | 1 | 2 | 0 |
| Case 78 | 1  | 142,649,718 | 249,218,992 | 1 | 1 | 2 | 0 |
| Case 78 | 2  | 18,674      | 92,081,640  | 1 | 1 | 2 | 0 |
| Case 78 | 2  | 95,429,424  | 243,048,760 | 1 | 1 | 2 | 0 |
| Case 78 | 3  | 61,495      | 90,442,925  | 1 | 1 | 2 | 0 |
| Case 78 | 3  | 93,537,290  | 197,838,262 | 1 | 1 | 2 | 0 |
| Case 78 | 4  | 71,566      | 49,620,898  | 1 | 1 | 2 | 0 |
| Case 78 | 4  | 52,697,856  | 190,963,766 | 1 | 1 | 2 | 0 |
| Case 78 | 5  | 38,139      | 46,399,093  | 1 | 1 | 2 | 0 |
| Case 78 | 5  | 49,457,282  | 180,693,127 | 1 | 1 | 2 | 0 |
| Case 78 | 6  | 108,666     | 58,752,089  | 1 | 1 | 2 | 0 |
| Case 78 | 6  | 61,891,118  | 170,980,171 | 1 | 1 | 2 | 0 |

|         |    |             |             |   |   |   |   |
|---------|----|-------------|-------------|---|---|---|---|
| Case 78 | 7  | 44,935      | 58,019,061  | 1 | 1 | 2 | 0 |
| Case 78 | 7  | 61,056,053  | 159,119,486 | 1 | 1 | 2 | 0 |
| Case 78 | 8  | 164,984     | 43,791,691  | 1 | 1 | 2 | 0 |
| Case 78 | 8  | 46,886,735  | 146,293,414 | 1 | 1 | 2 | 0 |
| Case 78 | 9  | 46,587      | 46,944,322  | 1 | 1 | 2 | 0 |
| Case 78 | 9  | 65,629,772  | 141,066,491 | 1 | 1 | 2 | 0 |
| Case 78 | 10 | 98,087      | 39,097,912  | 1 | 1 | 2 | 0 |
| Case 78 | 10 | 42,436,301  | 135,477,883 | 1 | 1 | 2 | 0 |
| Case 78 | 11 | 193,146     | 51,591,253  | 1 | 1 | 2 | 0 |
| Case 78 | 11 | 54,794,237  | 134,934,063 | 1 | 1 | 2 | 0 |
| Case 78 | 12 | 191,619     | 34,853,011  | 1 | 1 | 2 | 0 |
| Case 78 | 12 | 37,876,400  | 133,810,935 | 1 | 1 | 2 | 0 |
| Case 78 | 13 | 19,058,717  | 115,103,529 | 1 | 1 | 2 | 0 |
| Case 78 | 14 | 19,280,733  | 107,287,663 | 1 | 1 | 2 | 0 |
| Case 78 | 15 | 20,034,919  | 102,461,162 | 1 | 1 | 2 | 0 |
| Case 78 | 16 | 88,165      | 35,285,582  | 1 | 1 | 2 | 0 |
| Case 78 | 16 | 46,450,037  | 90,274,695  | 1 | 1 | 2 | 0 |
| Case 78 | 17 | 11,885      | 22,242,355  | 1 | 1 | 2 | 0 |
| Case 78 | 17 | 25,268,142  | 36,509,256  | 1 | 1 | 2 | 0 |
| Case 78 | 17 | 36,516,801  | 38,245,791  | 2 | 1 | 3 | 0 |
| Case 78 | 17 | 38,248,354  | 81,060,040  | 1 | 1 | 2 | 0 |
| Case 78 | 18 | 87,505      | 15,375,878  | 1 | 1 | 2 | 0 |
| Case 78 | 18 | 18,520,354  | 78,015,180  | 1 | 1 | 2 | 0 |
| Case 78 | 19 | 260,912     | 24,629,285  | 1 | 1 | 2 | 0 |
| Case 78 | 19 | 27,732,159  | 59,097,160  | 1 | 1 | 2 | 0 |
| Case 78 | 20 | 63,244      | 26,293,985  | 1 | 1 | 2 | 0 |
| Case 78 | 20 | 29,425,357  | 62,948,788  | 1 | 1 | 2 | 0 |
| Case 78 | 21 | 10,827,533  | 10,971,337  | 1 | 1 | 2 | 0 |
| Case 78 | 21 | 14,368,320  | 48,100,155  | 1 | 1 | 2 | 0 |
| Case 78 | 22 | 16,114,244  | 51,195,728  | 1 | 1 | 2 | 0 |
| Case 78 | X  | 2,700,157   | 58,488,110  | 1 | 1 | 2 | 0 |
| Case 78 | X  | 61,694,576  | 154,898,561 | 1 | 1 | 2 | 0 |
| Case 79 | 1  | 82,154      | 73,736,562  | 1 | 1 | 2 | 0 |
| Case 79 | 1  | 73,742,019  | 73,927,488  | 2 | 1 | 3 | 0 |
| Case 79 | 1  | 73,932,886  | 121,346,616 | 1 | 1 | 2 | 0 |
| Case 79 | 1  | 142,649,718 | 249,218,992 | 1 | 1 | 2 | 0 |
| Case 79 | 2  | 18,674      | 92,081,640  | 1 | 1 | 2 | 0 |
| Case 79 | 2  | 95,429,424  | 243,048,760 | 1 | 1 | 2 | 0 |
| Case 79 | 3  | 61,495      | 90,442,925  | 1 | 1 | 2 | 0 |
| Case 79 | 3  | 93,537,290  | 197,838,262 | 1 | 1 | 2 | 0 |
| Case 79 | 4  | 71,566      | 49,620,898  | 1 | 1 | 2 | 0 |
| Case 79 | 4  | 52,697,856  | 190,963,766 | 1 | 1 | 2 | 0 |
| Case 79 | 5  | 38,139      | 46,399,093  | 1 | 1 | 2 | 0 |
| Case 79 | 5  | 49,457,282  | 180,693,127 | 1 | 1 | 2 | 0 |
| Case 79 | 6  | 108,666     | 58,752,089  | 1 | 1 | 2 | 0 |
| Case 79 | 6  | 61,891,118  | 170,980,171 | 1 | 1 | 2 | 0 |
| Case 79 | 7  | 44,935      | 58,019,061  | 1 | 1 | 2 | 0 |
| Case 79 | 7  | 61,056,053  | 159,119,486 | 1 | 1 | 2 | 0 |
| Case 79 | 8  | 164,984     | 43,791,691  | 1 | 1 | 2 | 0 |
| Case 79 | 8  | 46,886,735  | 146,293,414 | 1 | 1 | 2 | 0 |
| Case 79 | 9  | 46,587      | 46,944,322  | 1 | 1 | 2 | 0 |
| Case 79 | 9  | 65,629,772  | 141,066,491 | 1 | 1 | 2 | 0 |
| Case 79 | 10 | 98,087      | 39,097,912  | 1 | 1 | 2 | 0 |
| Case 79 | 10 | 42,436,301  | 135,477,883 | 1 | 1 | 2 | 0 |
| Case 79 | 11 | 193,146     | 51,591,253  | 1 | 1 | 2 | 0 |
| Case 79 | 11 | 54,794,237  | 134,934,063 | 1 | 1 | 2 | 0 |
| Case 79 | 12 | 191,619     | 34,853,011  | 1 | 1 | 2 | 0 |
| Case 79 | 12 | 37,876,400  | 133,810,935 | 1 | 1 | 2 | 0 |
| Case 79 | 13 | 19,058,717  | 115,103,529 | 1 | 1 | 2 | 0 |
| Case 79 | 14 | 19,280,733  | 107,287,663 | 1 | 1 | 2 | 0 |
| Case 79 | 15 | 20,034,919  | 102,461,162 | 1 | 1 | 2 | 0 |

|         |    |             |             |   |   |   |   |
|---------|----|-------------|-------------|---|---|---|---|
| Case 79 | 16 | 88,165      | 35,285,582  | 1 | 1 | 2 | 0 |
| Case 79 | 16 | 46,450,037  | 90,274,695  | 1 | 1 | 2 | 0 |
| Case 79 | 17 | 11,885      | 22,242,355  | 1 | 1 | 2 | 0 |
| Case 79 | 17 | 25,268,142  | 37,676,209  | 1 | 1 | 2 | 0 |
| Case 79 | 17 | 37,682,375  | 38,074,518  | 2 | 1 | 3 | 0 |
| Case 79 | 17 | 38,075,426  | 38,430,059  | 1 | 1 | 2 | 0 |
| Case 79 | 17 | 38,443,493  | 38,671,228  | 2 | 1 | 3 | 0 |
| Case 79 | 17 | 38,698,666  | 81,060,040  | 1 | 1 | 2 | 0 |
| Case 79 | 18 | 87,505      | 15,375,878  | 1 | 1 | 2 | 0 |
| Case 79 | 18 | 18,520,354  | 78,015,180  | 1 | 1 | 2 | 0 |
| Case 79 | 19 | 260,912     | 24,629,285  | 1 | 1 | 2 | 0 |
| Case 79 | 19 | 27,732,159  | 59,097,160  | 1 | 1 | 2 | 0 |
| Case 79 | 20 | 63,244      | 26,293,985  | 1 | 1 | 2 | 0 |
| Case 79 | 20 | 29,425,357  | 62,948,788  | 1 | 1 | 2 | 0 |
| Case 79 | 21 | 10,827,533  | 10,971,337  | 1 | 1 | 2 | 0 |
| Case 79 | 21 | 14,368,320  | 48,100,155  | 1 | 1 | 2 | 0 |
| Case 79 | 22 | 16,114,244  | 51,195,728  | 1 | 1 | 2 | 0 |
| Case 79 | X  | 2,700,157   | 58,488,110  | 1 | 0 | 1 | 0 |
| Case 79 | X  | 61,694,576  | 154,898,561 | 1 | 0 | 1 | 0 |
| Case 80 | 1  | 82,154      | 1,664,019   | 3 | 0 | 3 | 1 |
| Case 80 | 1  | 1,664,124   | 4,010,743   | 2 | 0 | 2 | 1 |
| Case 80 | 1  | 4,012,472   | 15,860,803  | 3 | 0 | 3 | 1 |
| Case 80 | 1  | 15,865,604  | 19,809,758  | 2 | 0 | 2 | 1 |
| Case 80 | 1  | 19,822,813  | 20,096,176  | 3 | 0 | 3 | 1 |
| Case 80 | 1  | 20,096,220  | 20,402,767  | 4 | 0 | 4 | 1 |
| Case 80 | 1  | 20,403,098  | 26,117,323  | 3 | 0 | 3 | 1 |
| Case 80 | 1  | 26,118,299  | 36,095,055  | 2 | 0 | 2 | 1 |
| Case 80 | 1  | 36,095,920  | 37,020,422  | 3 | 0 | 3 | 1 |
| Case 80 | 1  | 37,021,076  | 38,059,416  | 2 | 0 | 2 | 1 |
| Case 80 | 1  | 38,078,300  | 38,157,717  | 3 | 0 | 3 | 1 |
| Case 80 | 1  | 38,157,844  | 53,751,610  | 2 | 0 | 2 | 1 |
| Case 80 | 1  | 53,752,134  | 53,925,247  | 3 | 0 | 3 | 1 |
| Case 80 | 1  | 53,926,037  | 59,832,762  | 2 | 0 | 2 | 1 |
| Case 80 | 1  | 59,841,785  | 61,132,661  | 3 | 0 | 3 | 1 |
| Case 80 | 1  | 61,133,462  | 61,359,395  | 2 | 0 | 2 | 1 |
| Case 80 | 1  | 61,359,835  | 64,038,174  | 3 | 0 | 3 | 1 |
| Case 80 | 1  | 64,046,766  | 95,958,467  | 2 | 0 | 2 | 1 |
| Case 80 | 1  | 95,966,161  | 98,667,546  | 3 | 0 | 3 | 1 |
| Case 80 | 1  | 98,669,164  | 110,538,926 | 2 | 0 | 2 | 1 |
| Case 80 | 1  | 110,543,024 | 110,665,192 | 3 | 0 | 3 | 1 |
| Case 80 | 1  | 110,671,320 | 116,970,461 | 2 | 0 | 2 | 1 |
| Case 80 | 1  | 116,988,030 | 121,346,616 | 3 | 0 | 3 | 1 |
| Case 80 | 1  | 142,649,718 | 151,763,246 | 3 | 0 | 3 | 1 |
| Case 80 | 1  | 151,770,138 | 152,184,704 | 4 | 0 | 4 | 1 |
| Case 80 | 1  | 152,184,950 | 155,257,018 | 3 | 0 | 3 | 1 |
| Case 80 | 1  | 155,257,087 | 155,505,967 | 2 | 0 | 2 | 1 |
| Case 80 | 1  | 155,508,882 | 162,334,100 | 3 | 0 | 3 | 1 |
| Case 80 | 1  | 162,335,256 | 168,438,268 | 2 | 0 | 2 | 1 |
| Case 80 | 1  | 168,443,178 | 169,363,203 | 3 | 0 | 3 | 1 |
| Case 80 | 1  | 169,366,494 | 192,900,182 | 2 | 0 | 2 | 1 |
| Case 80 | 1  | 192,902,415 | 193,181,196 | 1 | 0 | 1 | 0 |
| Case 80 | 1  | 193,193,597 | 201,125,326 | 2 | 0 | 2 | 1 |
| Case 80 | 1  | 201,133,774 | 201,692,871 | 3 | 0 | 3 | 1 |
| Case 80 | 1  | 201,699,395 | 201,983,242 | 2 | 0 | 2 | 1 |
| Case 80 | 1  | 201,986,418 | 202,197,082 | 3 | 0 | 3 | 1 |
| Case 80 | 1  | 202,197,161 | 206,973,239 | 2 | 0 | 2 | 1 |
| Case 80 | 1  | 206,973,715 | 207,220,800 | 4 | 0 | 4 | 1 |
| Case 80 | 1  | 207,221,612 | 225,776,831 | 2 | 0 | 2 | 1 |
| Case 80 | 1  | 225,792,814 | 226,053,660 | 3 | 0 | 3 | 1 |
| Case 80 | 1  | 226,054,333 | 226,292,585 | 2 | 0 | 2 | 1 |
| Case 80 | 1  | 226,300,488 | 226,567,298 | 3 | 0 | 3 | 1 |

|         |   |             |             |   |   |   |   |
|---------|---|-------------|-------------|---|---|---|---|
| Case 80 | 1 | 226,567,661 | 234,909,298 | 2 | 0 | 2 | 1 |
| Case 80 | 1 | 234,956,342 | 235,523,555 | 3 | 0 | 3 | 1 |
| Case 80 | 1 | 235,525,253 | 249,218,992 | 2 | 0 | 2 | 1 |
| Case 80 | 2 | 18,674      | 6,555,933   | 1 | 1 | 2 | 0 |
| Case 80 | 2 | 6,561,446   | 6,593,923   | 2 | 1 | 3 | 0 |
| Case 80 | 2 | 6,594,973   | 9,914,751   | 1 | 1 | 2 | 0 |
| Case 80 | 2 | 9,922,283   | 10,126,416  | 2 | 1 | 3 | 0 |
| Case 80 | 2 | 10,131,122  | 10,330,025  | 1 | 1 | 2 | 0 |
| Case 80 | 2 | 10,332,539  | 10,698,364  | 2 | 1 | 3 | 0 |
| Case 80 | 2 | 10,709,816  | 16,121,864  | 1 | 1 | 2 | 0 |
| Case 80 | 2 | 16,123,173  | 16,470,093  | 2 | 1 | 3 | 0 |
| Case 80 | 2 | 16,493,067  | 17,973,438  | 1 | 1 | 2 | 0 |
| Case 80 | 2 | 17,975,091  | 18,260,937  | 2 | 1 | 3 | 0 |
| Case 80 | 2 | 18,265,521  | 18,609,404  | 3 | 1 | 4 | 0 |
| Case 80 | 2 | 18,610,429  | 19,184,369  | 2 | 1 | 3 | 0 |
| Case 80 | 2 | 19,184,996  | 20,333,711  | 3 | 1 | 4 | 0 |
| Case 80 | 2 | 20,334,723  | 28,046,028  | 2 | 1 | 3 | 0 |
| Case 80 | 2 | 28,050,468  | 35,130,378  | 1 | 1 | 2 | 0 |
| Case 80 | 2 | 35,138,450  | 35,485,633  | 2 | 1 | 3 | 0 |
| Case 80 | 2 | 35,503,280  | 36,123,261  | 1 | 1 | 2 | 0 |
| Case 80 | 2 | 36,123,717  | 41,559,590  | 2 | 1 | 3 | 0 |
| Case 80 | 2 | 41,623,189  | 42,214,495  | 2 | 2 | 4 | 0 |
| Case 80 | 2 | 42,227,952  | 43,091,550  | 2 | 1 | 3 | 0 |
| Case 80 | 2 | 43,093,767  | 43,321,742  | 3 | 1 | 4 | 0 |
| Case 80 | 2 | 43,330,109  | 47,426,010  | 2 | 1 | 3 | 0 |
| Case 80 | 2 | 47,431,143  | 47,641,430  | 3 | 1 | 4 | 0 |
| Case 80 | 2 | 47,643,457  | 64,474,069  | 2 | 1 | 3 | 0 |
| Case 80 | 2 | 64,479,060  | 64,723,091  | 3 | 1 | 4 | 0 |
| Case 80 | 2 | 64,723,849  | 79,064,180  | 2 | 1 | 3 | 0 |
| Case 80 | 2 | 79,069,569  | 79,255,377  | 3 | 1 | 4 | 0 |
| Case 80 | 2 | 79,255,588  | 79,476,674  | 4 | 1 | 5 | 0 |
| Case 80 | 2 | 79,478,859  | 79,632,347  | 3 | 1 | 4 | 0 |
| Case 80 | 2 | 79,641,996  | 92,081,640  | 2 | 1 | 3 | 0 |
| Case 80 | 2 | 95,429,424  | 96,483,411  | 2 | 1 | 3 | 0 |
| Case 80 | 2 | 96,541,695  | 121,955,160 | 1 | 1 | 2 | 0 |
| Case 80 | 2 | 121,957,702 | 122,084,428 | 2 | 1 | 3 | 0 |
| Case 80 | 2 | 122,095,640 | 130,953,944 | 1 | 1 | 2 | 0 |
| Case 80 | 2 | 130,982,377 | 131,558,850 | 2 | 1 | 3 | 0 |
| Case 80 | 2 | 131,565,647 | 152,955,482 | 1 | 1 | 2 | 0 |
| Case 80 | 2 | 152,955,805 | 173,316,523 | 2 | 1 | 3 | 0 |
| Case 80 | 2 | 173,317,864 | 186,345,148 | 1 | 1 | 2 | 0 |
| Case 80 | 2 | 186,387,129 | 187,273,144 | 2 | 1 | 3 | 0 |
| Case 80 | 2 | 187,282,986 | 187,456,121 | 1 | 0 | 1 | 0 |
| Case 80 | 2 | 187,462,581 | 187,521,260 | 0 | 0 | 0 | 0 |
| Case 80 | 2 | 187,523,880 | 187,643,406 | 1 | 0 | 1 | 0 |
| Case 80 | 2 | 187,644,547 | 209,131,494 | 1 | 1 | 2 | 0 |
| Case 80 | 2 | 209,135,339 | 219,397,937 | 2 | 1 | 3 | 0 |
| Case 80 | 2 | 219,409,308 | 220,698,125 | 1 | 1 | 2 | 0 |
| Case 80 | 2 | 220,702,824 | 238,537,975 | 2 | 1 | 3 | 0 |
| Case 80 | 2 | 238,538,597 | 243,048,760 | 1 | 1 | 2 | 0 |
| Case 80 | 3 | 61,495      | 14,894,140  | 3 | 0 | 3 | 1 |
| Case 80 | 3 | 14,894,449  | 15,810,605  | 4 | 0 | 4 | 1 |
| Case 80 | 3 | 15,812,085  | 37,388,702  | 3 | 0 | 3 | 1 |
| Case 80 | 3 | 37,396,678  | 37,716,880  | 2 | 0 | 2 | 1 |
| Case 80 | 3 | 37,721,795  | 39,265,616  | 3 | 0 | 3 | 1 |
| Case 80 | 3 | 39,267,352  | 53,783,341  | 2 | 0 | 2 | 1 |
| Case 80 | 3 | 53,787,624  | 54,067,037  | 1 | 0 | 1 | 0 |
| Case 80 | 3 | 54,068,119  | 60,333,449  | 2 | 0 | 2 | 1 |
| Case 80 | 3 | 60,337,651  | 60,379,450  | 0 | 0 | 0 | 0 |
| Case 80 | 3 | 60,382,023  | 60,908,013  | 2 | 0 | 2 | 1 |
| Case 80 | 3 | 60,918,609  | 61,205,924  | 0 | 0 | 0 | 0 |



|         |   |             |             |   |   |   |   |
|---------|---|-------------|-------------|---|---|---|---|
| Case 80 | 3 | 61,211,945  | 85,661,265  | 2 | 0 | 2 | 1 |
| Case 80 | 3 | 85,663,849  | 90,442,925  | 2 | 1 | 3 | 0 |
| Case 80 | 3 | 93,537,290  | 109,178,758 | 2 | 1 | 3 | 0 |
| Case 80 | 3 | 109,182,586 | 109,591,203 | 2 | 0 | 2 | 1 |
| Case 80 | 3 | 109,604,806 | 174,486,282 | 2 | 1 | 3 | 0 |
| Case 80 | 3 | 174,494,183 | 174,596,166 | 1 | 1 | 2 | 0 |
| Case 80 | 3 | 174,608,936 | 174,757,260 | 1 | 0 | 1 | 0 |
| Case 80 | 3 | 174,764,910 | 175,403,905 | 1 | 1 | 2 | 0 |
| Case 80 | 3 | 175,410,177 | 178,007,676 | 2 | 1 | 3 | 0 |
| Case 80 | 3 | 178,008,970 | 178,105,341 | 1 | 1 | 2 | 0 |
| Case 80 | 3 | 178,107,949 | 197,838,262 | 2 | 1 | 3 | 0 |
| Case 80 | 4 | 71,566      | 1,985,717   | 1 | 1 | 2 | 0 |
| Case 80 | 4 | 1,985,774   | 2,307,466   | 1 | 0 | 1 | 0 |
| Case 80 | 4 | 2,307,574   | 2,452,087   | 2 | 0 | 2 | 1 |
| Case 80 | 4 | 2,458,078   | 19,576,975  | 1 | 1 | 2 | 0 |
| Case 80 | 4 | 19,584,331  | 19,821,565  | 1 | 0 | 1 | 0 |
| Case 80 | 4 | 19,827,258  | 37,208,370  | 1 | 1 | 2 | 0 |
| Case 80 | 4 | 37,210,649  | 37,668,484  | 2 | 1 | 3 | 0 |
| Case 80 | 4 | 37,675,941  | 37,962,104  | 1 | 1 | 2 | 0 |
| Case 80 | 4 | 37,962,133  | 38,022,282  | 2 | 1 | 3 | 0 |
| Case 80 | 4 | 38,023,294  | 38,413,846  | 3 | 1 | 4 | 0 |
| Case 80 | 4 | 38,419,597  | 49,620,898  | 1 | 1 | 2 | 0 |
| Case 80 | 4 | 52,697,856  | 74,736,144  | 1 | 1 | 2 | 0 |
| Case 80 | 4 | 74,737,930  | 74,846,877  | 2 | 1 | 3 | 0 |
| Case 80 | 4 | 74,847,598  | 91,806,782  | 1 | 1 | 2 | 0 |
| Case 80 | 4 | 91,816,783  | 92,025,683  | 0 | 0 | 0 | 0 |
| Case 80 | 4 | 92,028,168  | 152,992,266 | 1 | 1 | 2 | 0 |
| Case 80 | 4 | 152,994,226 | 190,963,766 | 1 | 0 | 1 | 0 |
| Case 80 | 5 | 38,139      | 488,590     | 1 | 1 | 2 | 0 |
| Case 80 | 5 | 490,237     | 677,988     | 2 | 1 | 3 | 0 |
| Case 80 | 5 | 685,504     | 3,131,474   | 1 | 1 | 2 | 0 |
| Case 80 | 5 | 3,132,025   | 12,407,352  | 2 | 1 | 3 | 0 |
| Case 80 | 5 | 12,437,894  | 12,778,499  | 1 | 1 | 2 | 0 |
| Case 80 | 5 | 12,780,942  | 46,399,093  | 2 | 1 | 3 | 0 |
| Case 80 | 5 | 49,457,282  | 58,271,696  | 2 | 1 | 3 | 0 |
| Case 80 | 5 | 58,284,208  | 58,778,414  | 2 | 0 | 2 | 1 |
| Case 80 | 5 | 58,782,840  | 59,655,640  | 0 | 0 | 0 | 0 |
| Case 80 | 5 | 59,657,695  | 59,895,032  | 2 | 0 | 2 | 1 |
| Case 80 | 5 | 59,926,911  | 77,461,466  | 2 | 1 | 3 | 0 |
| Case 80 | 5 | 77,461,480  | 85,316,605  | 2 | 0 | 2 | 1 |
| Case 80 | 5 | 85,321,761  | 85,411,181  | 3 | 0 | 3 | 1 |
| Case 80 | 5 | 85,413,146  | 98,131,350  | 2 | 0 | 2 | 1 |
| Case 80 | 5 | 98,131,505  | 98,537,121  | 3 | 0 | 3 | 1 |
| Case 80 | 5 | 98,552,184  | 114,580,742 | 2 | 0 | 2 | 1 |
| Case 80 | 5 | 114,588,898 | 114,989,990 | 4 | 0 | 4 | 1 |
| Case 80 | 5 | 114,994,084 | 127,006,007 | 2 | 0 | 2 | 1 |
| Case 80 | 5 | 127,031,523 | 127,350,549 | 3 | 0 | 3 | 1 |
| Case 80 | 5 | 127,357,526 | 173,791,376 | 2 | 0 | 2 | 1 |
| Case 80 | 5 | 173,793,906 | 174,052,037 | 4 | 0 | 4 | 1 |
| Case 80 | 5 | 174,060,774 | 180,693,127 | 2 | 0 | 2 | 1 |
| Case 80 | 6 | 108,666     | 1,997,212   | 3 | 0 | 3 | 1 |
| Case 80 | 6 | 2,012,739   | 13,048,051  | 2 | 0 | 2 | 1 |
| Case 80 | 6 | 13,055,406  | 13,332,467  | 0 | 0 | 0 | 0 |
| Case 80 | 6 | 13,336,815  | 30,471,520  | 2 | 0 | 2 | 1 |
| Case 80 | 6 | 30,475,415  | 32,110,267  | 3 | 0 | 3 | 1 |
| Case 80 | 6 | 32,112,559  | 43,018,872  | 2 | 0 | 2 | 1 |
| Case 80 | 6 | 43,018,909  | 44,413,736  | 3 | 0 | 3 | 1 |
| Case 80 | 6 | 44,421,240  | 56,193,637  | 2 | 0 | 2 | 1 |
| Case 80 | 6 | 56,202,104  | 56,417,095  | 3 | 0 | 3 | 1 |
| Case 80 | 6 | 56,417,248  | 58,752,089  | 2 | 0 | 2 | 1 |
| Case 80 | 6 | 61,891,118  | 89,740,625  | 2 | 0 | 2 | 1 |

|         |   |             |             |   |   |   |   |
|---------|---|-------------|-------------|---|---|---|---|
| Case 80 | 6 | 89,741,014  | 93,765,656  | 2 | 1 | 3 | 0 |
| Case 80 | 6 | 93,781,036  | 98,962,591  | 3 | 1 | 4 | 0 |
| Case 80 | 6 | 98,971,740  | 99,433,614  | 3 | 0 | 3 | 1 |
| Case 80 | 6 | 99,437,566  | 101,296,420 | 3 | 1 | 4 | 0 |
| Case 80 | 6 | 101,304,411 | 101,481,014 | 3 | 0 | 3 | 1 |
| Case 80 | 6 | 101,482,379 | 101,927,338 | 2 | 1 | 3 | 0 |
| Case 80 | 6 | 101,929,203 | 102,056,525 | 1 | 0 | 1 | 0 |
| Case 80 | 6 | 102,058,891 | 108,175,173 | 3 | 1 | 4 | 0 |
| Case 80 | 6 | 108,185,867 | 109,065,741 | 4 | 1 | 5 | 0 |
| Case 80 | 6 | 109,066,761 | 118,482,339 | 3 | 1 | 4 | 0 |
| Case 80 | 6 | 118,485,317 | 135,334,600 | 3 | 0 | 3 | 1 |
| Case 80 | 6 | 135,349,756 | 138,007,530 | 3 | 1 | 4 | 0 |
| Case 80 | 6 | 138,008,124 | 138,642,307 | 3 | 2 | 5 | 0 |
| Case 80 | 6 | 138,644,833 | 151,126,585 | 3 | 1 | 4 | 0 |
| Case 80 | 6 | 151,128,492 | 151,300,056 | 2 | 1 | 3 | 0 |
| Case 80 | 6 | 151,301,256 | 154,025,836 | 3 | 1 | 4 | 0 |
| Case 80 | 6 | 154,033,449 | 160,247,249 | 2 | 1 | 3 | 0 |
| Case 80 | 6 | 160,248,090 | 160,469,475 | 3 | 1 | 4 | 0 |
| Case 80 | 6 | 160,469,510 | 162,510,974 | 2 | 1 | 3 | 0 |
| Case 80 | 6 | 162,511,254 | 162,614,973 | 1 | 0 | 1 | 0 |
| Case 80 | 6 | 162,615,606 | 162,703,419 | 1 | 1 | 2 | 0 |
| Case 80 | 6 | 162,709,948 | 170,980,171 | 2 | 1 | 3 | 0 |
| Case 80 | 7 | 44,935      | 22,317,659  | 2 | 1 | 3 | 0 |
| Case 80 | 7 | 22,322,898  | 22,524,201  | 3 | 1 | 4 | 0 |
| Case 80 | 7 | 22,525,497  | 25,905,599  | 2 | 1 | 3 | 0 |
| Case 80 | 7 | 25,908,210  | 26,191,698  | 3 | 1 | 4 | 0 |
| Case 80 | 7 | 26,195,594  | 30,014,068  | 2 | 1 | 3 | 0 |
| Case 80 | 7 | 30,044,128  | 30,446,814  | 1 | 1 | 2 | 0 |
| Case 80 | 7 | 30,460,476  | 30,634,548  | 2 | 1 | 3 | 0 |
| Case 80 | 7 | 30,634,764  | 30,717,043  | 1 | 1 | 2 | 0 |
| Case 80 | 7 | 30,721,871  | 38,297,145  | 2 | 1 | 3 | 0 |
| Case 80 | 7 | 38,298,285  | 38,367,259  | 3 | 1 | 4 | 0 |
| Case 80 | 7 | 38,371,474  | 40,060,180  | 2 | 1 | 3 | 0 |
| Case 80 | 7 | 40,062,866  | 40,155,624  | 2 | 0 | 2 | 1 |
| Case 80 | 7 | 40,157,040  | 53,827,111  | 2 | 1 | 3 | 0 |
| Case 80 | 7 | 53,836,224  | 54,523,070  | 2 | 2 | 4 | 0 |
| Case 80 | 7 | 54,534,597  | 58,019,061  | 2 | 1 | 3 | 0 |
| Case 80 | 7 | 61,056,053  | 73,152,033  | 2 | 1 | 3 | 0 |
| Case 80 | 7 | 73,155,017  | 73,436,066  | 2 | 2 | 4 | 0 |
| Case 80 | 7 | 73,443,132  | 89,880,949  | 2 | 1 | 3 | 0 |
| Case 80 | 7 | 89,883,129  | 90,214,383  | 3 | 1 | 4 | 0 |
| Case 80 | 7 | 90,216,277  | 94,926,585  | 2 | 1 | 3 | 0 |
| Case 80 | 7 | 94,927,242  | 95,758,692  | 3 | 1 | 4 | 0 |
| Case 80 | 7 | 95,761,141  | 102,470,275 | 1 | 1 | 2 | 0 |
| Case 80 | 7 | 102,471,345 | 110,435,602 | 2 | 1 | 3 | 0 |
| Case 80 | 7 | 110,439,912 | 110,562,681 | 1 | 0 | 1 | 0 |
| Case 80 | 7 | 110,572,231 | 130,143,812 | 2 | 1 | 3 | 0 |
| Case 80 | 7 | 130,145,589 | 131,126,531 | 3 | 1 | 4 | 0 |
| Case 80 | 7 | 131,128,350 | 133,074,480 | 2 | 1 | 3 | 0 |
| Case 80 | 7 | 133,091,171 | 133,774,841 | 1 | 0 | 1 | 0 |
| Case 80 | 7 | 133,803,962 | 146,281,412 | 2 | 1 | 3 | 0 |
| Case 80 | 7 | 146,292,088 | 146,642,350 | 2 | 0 | 2 | 1 |
| Case 80 | 7 | 146,650,449 | 148,100,862 | 2 | 1 | 3 | 0 |
| Case 80 | 7 | 148,103,405 | 159,119,486 | 1 | 1 | 2 | 0 |
| Case 80 | 8 | 164,984     | 8,111,659   | 2 | 0 | 2 | 1 |
| Case 80 | 8 | 8,114,228   | 8,429,687   | 1 | 0 | 1 | 0 |
| Case 80 | 8 | 8,432,208   | 18,612,612  | 2 | 0 | 2 | 1 |
| Case 80 | 8 | 18,618,427  | 18,666,286  | 1 | 0 | 1 | 0 |
| Case 80 | 8 | 18,667,821  | 19,518,908  | 2 | 0 | 2 | 1 |
| Case 80 | 8 | 19,529,575  | 19,590,800  | 3 | 0 | 3 | 1 |
| Case 80 | 8 | 19,593,584  | 40,741,589  | 2 | 0 | 2 | 1 |

|         |    |             |             |   |   |   |   |
|---------|----|-------------|-------------|---|---|---|---|
| Case 80 | 8  | 40,756,407  | 43,791,691  | 2 | 1 | 3 | 0 |
| Case 80 | 8  | 46,886,735  | 61,722,552  | 2 | 1 | 3 | 0 |
| Case 80 | 8  | 61,726,879  | 61,805,324  | 1 | 1 | 2 | 0 |
| Case 80 | 8  | 61,809,348  | 90,660,515  | 2 | 1 | 3 | 0 |
| Case 80 | 8  | 90,662,941  | 91,064,635  | 1 | 1 | 2 | 0 |
| Case 80 | 8  | 91,067,028  | 99,057,903  | 2 | 1 | 3 | 0 |
| Case 80 | 8  | 99,088,251  | 99,203,508  | 1 | 1 | 2 | 0 |
| Case 80 | 8  | 99,204,723  | 124,601,535 | 2 | 1 | 3 | 0 |
| Case 80 | 8  | 124,604,759 | 124,663,857 | 1 | 1 | 2 | 0 |
| Case 80 | 8  | 124,663,895 | 128,400,176 | 2 | 1 | 3 | 0 |
| Case 80 | 8  | 128,401,772 | 128,519,957 | 2 | 2 | 4 | 0 |
| Case 80 | 8  | 128,525,268 | 137,041,406 | 2 | 1 | 3 | 0 |
| Case 80 | 8  | 137,042,133 | 137,142,227 | 1 | 1 | 2 | 0 |
| Case 80 | 8  | 137,148,085 | 141,634,540 | 2 | 1 | 3 | 0 |
| Case 80 | 8  | 141,642,392 | 145,286,483 | 1 | 1 | 2 | 0 |
| Case 80 | 8  | 145,504,343 | 145,655,903 | 2 | 1 | 3 | 0 |
| Case 80 | 8  | 145,657,827 | 146,293,414 | 1 | 1 | 2 | 0 |
| Case 80 | 9  | 46,587      | 5,044,432   | 2 | 0 | 2 | 1 |
| Case 80 | 9  | 5,044,458   | 5,467,955   | 3 | 0 | 3 | 1 |
| Case 80 | 9  | 5,468,257   | 11,618,203  | 2 | 0 | 2 | 1 |
| Case 80 | 9  | 11,645,495  | 12,185,185  | 1 | 0 | 1 | 0 |
| Case 80 | 9  | 12,192,428  | 19,058,456  | 2 | 0 | 2 | 1 |
| Case 80 | 9  | 19,058,733  | 19,258,183  | 3 | 0 | 3 | 1 |
| Case 80 | 9  | 19,281,501  | 29,092,556  | 2 | 0 | 2 | 1 |
| Case 80 | 9  | 29,112,301  | 29,501,683  | 1 | 0 | 1 | 0 |
| Case 80 | 9  | 29,508,543  | 46,944,322  | 2 | 0 | 2 | 1 |
| Case 80 | 9  | 65,629,772  | 79,188,714  | 2 | 0 | 2 | 1 |
| Case 80 | 9  | 79,189,090  | 79,244,174  | 3 | 0 | 3 | 1 |
| Case 80 | 9  | 79,251,229  | 95,860,415  | 2 | 0 | 2 | 1 |
| Case 80 | 9  | 95,869,726  | 96,099,377  | 3 | 0 | 3 | 1 |
| Case 80 | 9  | 96,117,149  | 103,919,670 | 2 | 0 | 2 | 1 |
| Case 80 | 9  | 103,920,578 | 104,439,370 | 3 | 0 | 3 | 1 |
| Case 80 | 9  | 104,443,319 | 114,846,751 | 2 | 0 | 2 | 1 |
| Case 80 | 9  | 114,850,190 | 114,942,200 | 3 | 0 | 3 | 1 |
| Case 80 | 9  | 114,960,138 | 126,753,312 | 2 | 0 | 2 | 1 |
| Case 80 | 9  | 126,756,640 | 127,113,732 | 2 | 1 | 3 | 0 |
| Case 80 | 9  | 127,114,489 | 135,845,035 | 2 | 0 | 2 | 1 |
| Case 80 | 9  | 135,849,248 | 136,079,463 | 3 | 0 | 3 | 1 |
| Case 80 | 9  | 136,080,272 | 141,066,491 | 2 | 0 | 2 | 1 |
| Case 80 | 10 | 98,087      | 5,442,831   | 3 | 0 | 3 | 1 |
| Case 80 | 10 | 5,442,851   | 5,869,839   | 4 | 0 | 4 | 1 |
| Case 80 | 10 | 5,871,328   | 39,097,912  | 3 | 0 | 3 | 1 |
| Case 80 | 10 | 42,436,301  | 102,391,740 | 2 | 0 | 2 | 1 |
| Case 80 | 10 | 102,396,758 | 102,810,715 | 3 | 0 | 3 | 1 |
| Case 80 | 10 | 102,820,392 | 112,555,409 | 2 | 0 | 2 | 1 |
| Case 80 | 10 | 112,555,472 | 112,753,721 | 3 | 0 | 3 | 1 |
| Case 80 | 10 | 112,763,385 | 123,954,614 | 2 | 0 | 2 | 1 |
| Case 80 | 10 | 123,954,638 | 124,156,852 | 0 | 0 | 0 | 0 |
| Case 80 | 10 | 124,158,293 | 135,477,883 | 2 | 0 | 2 | 1 |
| Case 80 | 11 | 193,146     | 614,799     | 3 | 0 | 3 | 1 |
| Case 80 | 11 | 616,865     | 2,101,692   | 2 | 0 | 2 | 1 |
| Case 80 | 11 | 2,107,655   | 2,549,229   | 3 | 0 | 3 | 1 |
| Case 80 | 11 | 2,550,730   | 26,818,083  | 2 | 0 | 2 | 1 |
| Case 80 | 11 | 26,819,928  | 27,930,079  | 4 | 0 | 4 | 1 |
| Case 80 | 11 | 27,932,280  | 34,190,423  | 2 | 0 | 2 | 1 |
| Case 80 | 11 | 34,190,762  | 34,486,626  | 3 | 0 | 3 | 1 |
| Case 80 | 11 | 34,487,729  | 51,591,253  | 2 | 0 | 2 | 1 |
| Case 80 | 11 | 54,794,237  | 77,055,786  | 2 | 0 | 2 | 1 |
| Case 80 | 11 | 77,069,746  | 77,498,768  | 3 | 0 | 3 | 1 |
| Case 80 | 11 | 77,526,474  | 84,634,790  | 2 | 0 | 2 | 1 |
| Case 80 | 11 | 84,636,486  | 85,379,051  | 1 | 0 | 1 | 0 |

|         |    |             |             |   |   |   |   |
|---------|----|-------------|-------------|---|---|---|---|
| Case 80 | 11 | 85,394,238  | 102,070,639 | 2 | 0 | 2 | 1 |
| Case 80 | 11 | 102,076,653 | 102,378,193 | 4 | 0 | 4 | 1 |
| Case 80 | 11 | 102,378,560 | 118,343,393 | 2 | 0 | 2 | 1 |
| Case 80 | 11 | 118,343,684 | 118,579,747 | 3 | 0 | 3 | 1 |
| Case 80 | 11 | 118,610,463 | 134,934,063 | 2 | 0 | 2 | 1 |
| Case 80 | 12 | 191,619     | 7,987,761   | 1 | 1 | 2 | 0 |
| Case 80 | 12 | 7,993,316   | 26,957,401  | 2 | 1 | 3 | 0 |
| Case 80 | 12 | 26,958,323  | 27,070,642  | 3 | 1 | 4 | 0 |
| Case 80 | 12 | 27,070,646  | 34,853,011  | 2 | 1 | 3 | 0 |
| Case 80 | 12 | 37,876,400  | 52,057,660  | 2 | 1 | 3 | 0 |
| Case 80 | 12 | 52,060,359  | 52,204,246  | 1 | 0 | 1 | 0 |
| Case 80 | 12 | 52,211,617  | 52,859,985  | 2 | 1 | 3 | 0 |
| Case 80 | 12 | 52,862,614  | 55,805,647  | 1 | 1 | 2 | 0 |
| Case 80 | 12 | 55,815,369  | 100,137,417 | 2 | 1 | 3 | 0 |
| Case 80 | 12 | 100,139,334 | 100,300,029 | 1 | 0 | 1 | 0 |
| Case 80 | 12 | 100,302,473 | 106,593,535 | 2 | 1 | 3 | 0 |
| Case 80 | 12 | 106,593,927 | 115,629,903 | 1 | 1 | 2 | 0 |
| Case 80 | 12 | 115,634,875 | 133,237,641 | 2 | 1 | 3 | 0 |
| Case 80 | 12 | 133,238,076 | 133,286,192 | 1 | 0 | 1 | 0 |
| Case 80 | 12 | 133,286,894 | 133,810,935 | 2 | 1 | 3 | 0 |
| Case 80 | 13 | 19,058,717  | 27,386,655  | 1 | 1 | 2 | 0 |
| Case 80 | 13 | 27,387,857  | 27,456,852  | 3 | 1 | 4 | 0 |
| Case 80 | 13 | 27,457,842  | 27,629,676  | 4 | 1 | 5 | 0 |
| Case 80 | 13 | 27,629,806  | 31,083,678  | 1 | 1 | 2 | 0 |
| Case 80 | 13 | 31,087,598  | 37,136,688  | 2 | 1 | 3 | 0 |
| Case 80 | 13 | 37,136,909  | 44,514,180  | 1 | 1 | 2 | 0 |
| Case 80 | 13 | 44,514,431  | 74,207,444  | 2 | 1 | 3 | 0 |
| Case 80 | 13 | 74,213,538  | 95,262,116  | 2 | 0 | 2 | 1 |
| Case 80 | 13 | 95,264,604  | 95,508,061  | 1 | 0 | 1 | 0 |
| Case 80 | 13 | 95,513,006  | 96,415,910  | 2 | 0 | 2 | 1 |
| Case 80 | 13 | 96,416,192  | 99,100,157  | 1 | 0 | 1 | 0 |
| Case 80 | 13 | 99,100,474  | 99,378,664  | 2 | 0 | 2 | 1 |
| Case 80 | 13 | 99,378,690  | 99,783,668  | 1 | 0 | 1 | 0 |
| Case 80 | 13 | 99,787,021  | 105,022,220 | 2 | 0 | 2 | 1 |
| Case 80 | 13 | 105,023,322 | 115,103,529 | 2 | 1 | 3 | 0 |
| Case 80 | 14 | 19,280,733  | 22,859,482  | 2 | 0 | 2 | 1 |
| Case 80 | 14 | 22,861,516  | 22,957,900  | 3 | 0 | 3 | 1 |
| Case 80 | 14 | 22,959,592  | 61,884,022  | 2 | 0 | 2 | 1 |
| Case 80 | 14 | 61,886,264  | 62,204,978  | 3 | 0 | 3 | 1 |
| Case 80 | 14 | 62,207,557  | 64,936,106  | 2 | 0 | 2 | 1 |
| Case 80 | 14 | 64,936,652  | 65,929,132  | 3 | 0 | 3 | 1 |
| Case 80 | 14 | 65,941,547  | 95,462,477  | 2 | 0 | 2 | 1 |
| Case 80 | 14 | 95,469,906  | 96,378,248  | 3 | 0 | 3 | 1 |
| Case 80 | 14 | 96,379,833  | 107,287,663 | 2 | 0 | 2 | 1 |
| Case 80 | 15 | 20,034,919  | 25,602,950  | 2 | 1 | 3 | 0 |
| Case 80 | 15 | 25,616,494  | 25,803,609  | 1 | 1 | 2 | 0 |
| Case 80 | 15 | 25,808,285  | 62,283,887  | 2 | 1 | 3 | 0 |
| Case 80 | 15 | 62,300,870  | 62,514,596  | 2 | 2 | 4 | 0 |
| Case 80 | 15 | 62,519,658  | 85,280,864  | 2 | 1 | 3 | 0 |
| Case 80 | 15 | 85,287,372  | 85,575,676  | 2 | 2 | 4 | 0 |
| Case 80 | 15 | 85,583,088  | 90,233,553  | 2 | 1 | 3 | 0 |
| Case 80 | 15 | 90,234,005  | 91,108,674  | 3 | 1 | 4 | 0 |
| Case 80 | 15 | 91,114,376  | 102,461,162 | 2 | 1 | 3 | 0 |
| Case 80 | 16 | 88,165      | 2,766,531   | 1 | 0 | 1 | 0 |
| Case 80 | 16 | 2,768,702   | 11,780,655  | 2 | 0 | 2 | 1 |
| Case 80 | 16 | 11,781,582  | 12,040,511  | 3 | 0 | 3 | 1 |
| Case 80 | 16 | 12,043,512  | 16,100,018  | 2 | 0 | 2 | 1 |
| Case 80 | 16 | 16,100,513  | 16,155,103  | 0 | 0 | 0 | 0 |
| Case 80 | 16 | 16,158,034  | 35,285,582  | 2 | 0 | 2 | 1 |
| Case 80 | 16 | 46,450,037  | 50,600,877  | 2 | 0 | 2 | 1 |
| Case 80 | 16 | 50,626,195  | 50,811,118  | 3 | 0 | 3 | 1 |

|         |    |            |            |   |   |   |   |
|---------|----|------------|------------|---|---|---|---|
| Case 80 | 16 | 50,815,188 | 78,190,218 | 2 | 0 | 2 | 1 |
| Case 80 | 16 | 78,190,234 | 78,268,913 | 0 | 0 | 0 | 0 |
| Case 80 | 16 | 78,270,078 | 89,805,074 | 2 | 0 | 2 | 1 |
| Case 80 | 16 | 89,805,301 | 90,103,117 | 3 | 0 | 3 | 1 |
| Case 80 | 16 | 90,103,659 | 90,274,695 | 2 | 0 | 2 | 1 |
| Case 80 | 17 | 11,885     | 10,550,522 | 2 | 0 | 2 | 1 |
| Case 80 | 17 | 10,553,937 | 10,781,802 | 3 | 0 | 3 | 1 |
| Case 80 | 17 | 10,783,871 | 17,722,470 | 2 | 0 | 2 | 1 |
| Case 80 | 17 | 17,722,503 | 18,108,496 | 3 | 0 | 3 | 1 |
| Case 80 | 17 | 18,111,793 | 22,242,355 | 2 | 0 | 2 | 1 |
| Case 80 | 17 | 25,268,142 | 25,749,688 | 2 | 0 | 2 | 1 |
| Case 80 | 17 | 25,750,795 | 26,349,998 | 3 | 0 | 3 | 1 |
| Case 80 | 17 | 26,367,840 | 55,759,115 | 2 | 0 | 2 | 1 |
| Case 80 | 17 | 55,763,271 | 56,085,439 | 3 | 0 | 3 | 1 |
| Case 80 | 17 | 56,085,465 | 73,571,030 | 2 | 0 | 2 | 1 |
| Case 80 | 17 | 73,572,233 | 74,087,996 | 3 | 0 | 3 | 1 |
| Case 80 | 17 | 74,089,311 | 78,054,102 | 2 | 0 | 2 | 1 |
| Case 80 | 17 | 78,055,455 | 78,162,296 | 3 | 0 | 3 | 1 |
| Case 80 | 17 | 78,162,327 | 80,004,928 | 2 | 0 | 2 | 1 |
| Case 80 | 17 | 80,005,032 | 81,060,040 | 3 | 0 | 3 | 1 |
| Case 80 | 18 | 87,505     | 3,534,608  | 3 | 0 | 3 | 1 |
| Case 80 | 18 | 3,547,523  | 3,748,286  | 4 | 0 | 4 | 1 |
| Case 80 | 18 | 3,768,254  | 15,375,878 | 3 | 0 | 3 | 1 |
| Case 80 | 18 | 18,520,354 | 34,065,941 | 3 | 0 | 3 | 1 |
| Case 80 | 18 | 34,067,978 | 34,587,096 | 2 | 0 | 2 | 1 |
| Case 80 | 18 | 34,630,103 | 59,896,321 | 3 | 0 | 3 | 1 |
| Case 80 | 18 | 59,896,965 | 78,015,180 | 2 | 0 | 2 | 1 |
| Case 80 | 19 | 260,912    | 661,080    | 2 | 0 | 2 | 1 |
| Case 80 | 19 | 663,929    | 2,210,659  | 1 | 0 | 1 | 0 |
| Case 80 | 19 | 2,211,050  | 10,526,009 | 2 | 0 | 2 | 1 |
| Case 80 | 19 | 10,537,268 | 13,873,996 | 1 | 1 | 2 | 0 |
| Case 80 | 19 | 13,875,421 | 14,094,354 | 2 | 1 | 3 | 0 |
| Case 80 | 19 | 14,101,909 | 19,855,654 | 1 | 1 | 2 | 0 |
| Case 80 | 19 | 19,858,318 | 24,629,285 | 2 | 1 | 3 | 0 |
| Case 80 | 19 | 27,732,159 | 35,685,115 | 2 | 1 | 3 | 0 |
| Case 80 | 19 | 35,685,456 | 39,729,479 | 1 | 1 | 2 | 0 |
| Case 80 | 19 | 39,731,747 | 39,880,133 | 2 | 1 | 3 | 0 |
| Case 80 | 19 | 39,882,034 | 39,959,745 | 1 | 1 | 2 | 0 |
| Case 80 | 19 | 39,963,853 | 42,083,626 | 2 | 1 | 3 | 0 |
| Case 80 | 19 | 42,083,673 | 42,407,872 | 2 | 2 | 4 | 0 |
| Case 80 | 19 | 42,408,188 | 44,207,318 | 1 | 1 | 2 | 0 |
| Case 80 | 19 | 44,213,380 | 49,053,248 | 2 | 1 | 3 | 0 |
| Case 80 | 19 | 49,053,306 | 49,099,381 | 3 | 1 | 4 | 0 |
| Case 80 | 19 | 49,099,955 | 49,506,390 | 2 | 1 | 3 | 0 |
| Case 80 | 19 | 49,507,562 | 59,097,160 | 1 | 1 | 2 | 0 |
| Case 80 | 20 | 63,244     | 1,960,313  | 2 | 2 | 4 | 0 |
| Case 80 | 20 | 1,961,018  | 6,510,902  | 2 | 1 | 3 | 0 |
| Case 80 | 20 | 6,526,125  | 6,997,406  | 2 | 0 | 2 | 1 |
| Case 80 | 20 | 7,006,365  | 15,416,394 | 2 | 1 | 3 | 0 |
| Case 80 | 20 | 15,420,403 | 16,014,926 | 3 | 0 | 3 | 1 |
| Case 80 | 20 | 16,015,163 | 16,496,299 | 2 | 1 | 3 | 0 |
| Case 80 | 20 | 16,500,093 | 16,702,663 | 2 | 2 | 4 | 0 |
| Case 80 | 20 | 16,702,902 | 24,098,673 | 2 | 1 | 3 | 0 |
| Case 80 | 20 | 24,098,762 | 25,181,074 | 2 | 2 | 4 | 0 |
| Case 80 | 20 | 25,184,466 | 26,293,985 | 2 | 1 | 3 | 0 |
| Case 80 | 20 | 29,425,357 | 30,232,904 | 2 | 1 | 3 | 0 |
| Case 80 | 20 | 30,235,302 | 48,013,369 | 2 | 2 | 4 | 0 |
| Case 80 | 20 | 48,016,913 | 48,973,041 | 3 | 2 | 5 | 0 |
| Case 80 | 20 | 48,973,810 | 49,036,909 | 4 | 1 | 5 | 0 |
| Case 80 | 20 | 49,037,061 | 60,861,061 | 3 | 0 | 3 | 1 |
| Case 80 | 20 | 60,866,789 | 62,948,788 | 2 | 0 | 2 | 1 |

|         |    |             |             |   |   |   |   |
|---------|----|-------------|-------------|---|---|---|---|
| Case 80 | 21 | 10,827,533  | 10,971,337  | 2 | 0 | 2 | 1 |
| Case 80 | 21 | 14,368,320  | 27,374,450  | 2 | 0 | 2 | 1 |
| Case 80 | 21 | 27,374,604  | 27,484,463  | 0 | 0 | 0 | 0 |
| Case 80 | 21 | 27,495,183  | 36,554,943  | 2 | 0 | 2 | 1 |
| Case 80 | 21 | 36,561,074  | 36,722,562  | 3 | 0 | 3 | 1 |
| Case 80 | 21 | 36,723,544  | 39,696,858  | 2 | 0 | 2 | 1 |
| Case 80 | 21 | 39,698,055  | 40,670,434  | 3 | 0 | 3 | 1 |
| Case 80 | 21 | 40,686,327  | 44,628,741  | 2 | 0 | 2 | 1 |
| Case 80 | 21 | 44,690,691  | 48,100,155  | 3 | 0 | 3 | 1 |
| Case 80 | 22 | 16,114,244  | 29,446,903  | 2 | 0 | 2 | 1 |
| Case 80 | 22 | 29,449,477  | 29,517,453  | 0 | 0 | 0 | 0 |
| Case 80 | 22 | 29,517,463  | 46,356,554  | 2 | 0 | 2 | 1 |
| Case 80 | 22 | 46,362,396  | 51,195,728  | 3 | 0 | 3 | 1 |
| Case 80 | X  | 2,700,157   | 6,518,873   | 2 | 0 | 2 | 1 |
| Case 80 | X  | 6,532,072   | 6,710,327   | 0 | 0 | 0 | 0 |
| Case 80 | X  | 6,715,164   | 41,446,185  | 2 | 0 | 2 | 1 |
| Case 80 | X  | 41,464,880  | 41,610,129  | 0 | 0 | 0 | 0 |
| Case 80 | X  | 41,640,865  | 58,488,110  | 2 | 0 | 2 | 1 |
| Case 80 | X  | 61,694,576  | 123,775,824 | 2 | 0 | 2 | 1 |
| Case 80 | X  | 123,786,762 | 124,262,612 | 0 | 0 | 0 | 0 |
| Case 80 | X  | 124,269,783 | 154,898,561 | 2 | 0 | 2 | 1 |
| Case 82 | 1  | 82,154      | 121,346,616 | 1 | 1 | 2 | 0 |
| Case 82 | 1  | 142,649,718 | 249,218,992 | 1 | 1 | 2 | 0 |
| Case 82 | 2  | 18,674      | 92,081,640  | 1 | 1 | 2 | 0 |
| Case 82 | 2  | 95,429,424  | 243,048,760 | 1 | 1 | 2 | 0 |
| Case 82 | 3  | 61,495      | 90,442,925  | 1 | 1 | 2 | 0 |
| Case 82 | 3  | 93,537,290  | 197,838,262 | 1 | 1 | 2 | 0 |
| Case 82 | 4  | 71,566      | 49,620,898  | 1 | 1 | 2 | 0 |
| Case 82 | 4  | 52,697,856  | 190,963,766 | 1 | 1 | 2 | 0 |
| Case 82 | 5  | 38,139      | 46,399,093  | 1 | 1 | 2 | 0 |
| Case 82 | 5  | 49,457,282  | 180,693,127 | 1 | 1 | 2 | 0 |
| Case 82 | 6  | 108,666     | 31,338,528  | 1 | 1 | 2 | 0 |
| Case 82 | 6  | 31,340,075  | 31,342,484  | 0 | 0 | 0 | 0 |
| Case 82 | 6  | 31,342,631  | 58,752,089  | 1 | 1 | 2 | 0 |
| Case 82 | 6  | 61,891,118  | 170,980,171 | 1 | 1 | 2 | 0 |
| Case 82 | 7  | 44,935      | 58,019,061  | 1 | 1 | 2 | 0 |
| Case 82 | 7  | 61,056,053  | 159,119,486 | 1 | 1 | 2 | 0 |
| Case 82 | 8  | 164,984     | 2,132,561   | 1 | 1 | 2 | 0 |
| Case 82 | 8  | 2,133,338   | 2,391,471   | 2 | 1 | 3 | 0 |
| Case 82 | 8  | 2,394,776   | 43,791,691  | 1 | 1 | 2 | 0 |
| Case 82 | 8  | 46,886,735  | 146,293,414 | 1 | 1 | 2 | 0 |
| Case 82 | 9  | 46,587      | 46,944,322  | 1 | 1 | 2 | 0 |
| Case 82 | 9  | 65,629,772  | 141,066,491 | 1 | 1 | 2 | 0 |
| Case 82 | 10 | 98,087      | 39,097,912  | 1 | 1 | 2 | 0 |
| Case 82 | 10 | 42,436,301  | 135,477,883 | 1 | 1 | 2 | 0 |
| Case 82 | 11 | 193,146     | 51,591,253  | 1 | 1 | 2 | 0 |
| Case 82 | 11 | 54,794,237  | 134,934,063 | 1 | 1 | 2 | 0 |
| Case 82 | 12 | 191,619     | 34,853,011  | 1 | 1 | 2 | 0 |
| Case 82 | 12 | 37,876,400  | 133,810,935 | 1 | 1 | 2 | 0 |
| Case 82 | 13 | 19,058,717  | 115,103,529 | 1 | 1 | 2 | 0 |
| Case 82 | 14 | 19,280,733  | 107,287,663 | 1 | 1 | 2 | 0 |
| Case 82 | 15 | 20,034,919  | 102,461,162 | 1 | 1 | 2 | 0 |
| Case 82 | 16 | 88,165      | 35,285,582  | 1 | 1 | 2 | 0 |
| Case 82 | 16 | 46,450,037  | 90,274,695  | 1 | 1 | 2 | 0 |
| Case 82 | 17 | 11,885      | 22,242,355  | 1 | 1 | 2 | 0 |
| Case 82 | 17 | 25,268,142  | 81,060,040  | 1 | 1 | 2 | 0 |
| Case 82 | 18 | 87,505      | 15,375,878  | 1 | 1 | 2 | 0 |
| Case 82 | 18 | 18,520,354  | 78,015,180  | 1 | 1 | 2 | 0 |
| Case 82 | 19 | 260,912     | 24,629,285  | 1 | 1 | 2 | 0 |
| Case 82 | 19 | 27,732,159  | 59,097,160  | 1 | 1 | 2 | 0 |
| Case 82 | 20 | 63,244      | 26,293,985  | 1 | 1 | 2 | 0 |

|         |    |             |             |   |   |   |   |
|---------|----|-------------|-------------|---|---|---|---|
| Case 82 | 20 | 29,425,357  | 62,948,788  | 1 | 1 | 2 | 0 |
| Case 82 | 21 | 10,827,533  | 10,971,337  | 1 | 1 | 2 | 0 |
| Case 82 | 21 | 14,368,320  | 48,100,155  | 1 | 1 | 2 | 0 |
| Case 82 | 22 | 16,114,244  | 51,195,728  | 1 | 1 | 2 | 0 |
| Case 82 | X  | 2,700,157   | 58,488,110  | 1 | 0 | 1 | 0 |
| Case 82 | X  | 61,694,576  | 92,102,646  | 1 | 0 | 1 | 0 |
| Case 82 | X  | 92,110,530  | 154,898,561 | 1 | 1 | 2 | 0 |
| Case 83 | 1  | 82,154      | 121,346,616 | 1 | 1 | 2 | 0 |
| Case 83 | 1  | 142,649,718 | 196,823,300 | 1 | 1 | 2 | 0 |
| Case 83 | 1  | 196,823,613 | 196,901,753 | 2 | 1 | 3 | 0 |
| Case 83 | 1  | 196,918,605 | 249,218,992 | 1 | 1 | 2 | 0 |
| Case 83 | 2  | 18,674      | 92,081,640  | 1 | 1 | 2 | 0 |
| Case 83 | 2  | 95,429,424  | 243,048,760 | 1 | 1 | 2 | 0 |
| Case 83 | 3  | 61,495      | 90,442,925  | 1 | 1 | 2 | 0 |
| Case 83 | 3  | 93,537,290  | 197,838,262 | 1 | 1 | 2 | 0 |
| Case 83 | 4  | 71,566      | 49,620,898  | 1 | 1 | 2 | 0 |
| Case 83 | 4  | 52,697,856  | 190,963,766 | 1 | 1 | 2 | 0 |
| Case 83 | 5  | 38,139      | 46,399,093  | 1 | 1 | 2 | 0 |
| Case 83 | 5  | 49,457,282  | 180,693,127 | 1 | 1 | 2 | 0 |
| Case 83 | 6  | 108,666     | 58,752,089  | 1 | 1 | 2 | 0 |
| Case 83 | 6  | 61,891,118  | 170,980,171 | 1 | 1 | 2 | 0 |
| Case 83 | 7  | 44,935      | 58,019,061  | 1 | 1 | 2 | 0 |
| Case 83 | 7  | 61,056,053  | 159,119,486 | 1 | 1 | 2 | 0 |
| Case 83 | 8  | 164,984     | 43,791,691  | 1 | 1 | 2 | 0 |
| Case 83 | 8  | 46,886,735  | 146,293,414 | 1 | 1 | 2 | 0 |
| Case 83 | 9  | 46,587      | 46,944,322  | 1 | 1 | 2 | 0 |
| Case 83 | 9  | 65,629,772  | 141,066,491 | 1 | 1 | 2 | 0 |
| Case 83 | 10 | 98,087      | 39,097,912  | 1 | 1 | 2 | 0 |
| Case 83 | 10 | 42,436,301  | 135,477,883 | 1 | 1 | 2 | 0 |
| Case 83 | 11 | 193,146     | 51,591,253  | 1 | 1 | 2 | 0 |
| Case 83 | 11 | 54,794,237  | 134,934,063 | 1 | 1 | 2 | 0 |
| Case 83 | 12 | 191,619     | 34,853,011  | 1 | 1 | 2 | 0 |
| Case 83 | 12 | 37,876,400  | 133,810,935 | 1 | 1 | 2 | 0 |
| Case 83 | 13 | 19,058,717  | 109,813,327 | 1 | 1 | 2 | 0 |
| Case 83 | 13 | 109,814,635 | 110,720,314 | 4 | 1 | 5 | 0 |
| Case 83 | 13 | 110,723,649 | 115,103,529 | 1 | 1 | 2 | 0 |
| Case 83 | 14 | 19,280,733  | 107,287,663 | 1 | 1 | 2 | 0 |
| Case 83 | 15 | 20,034,919  | 102,461,162 | 1 | 1 | 2 | 0 |
| Case 83 | 16 | 88,165      | 35,285,582  | 1 | 1 | 2 | 0 |
| Case 83 | 16 | 46,450,037  | 90,274,695  | 1 | 1 | 2 | 0 |
| Case 83 | 17 | 11,885      | 22,242,355  | 1 | 1 | 2 | 0 |
| Case 83 | 17 | 25,268,142  | 81,060,040  | 1 | 1 | 2 | 0 |
| Case 83 | 18 | 87,505      | 15,375,878  | 1 | 1 | 2 | 0 |
| Case 83 | 18 | 18,520,354  | 78,015,180  | 1 | 1 | 2 | 0 |
| Case 83 | 19 | 260,912     | 24,629,285  | 1 | 1 | 2 | 0 |
| Case 83 | 19 | 27,732,159  | 59,097,160  | 1 | 1 | 2 | 0 |
| Case 83 | 20 | 63,244      | 26,293,985  | 1 | 1 | 2 | 0 |
| Case 83 | 20 | 29,425,357  | 62,948,788  | 1 | 1 | 2 | 0 |
| Case 83 | 21 | 10,827,533  | 10,971,337  | 1 | 1 | 2 | 0 |
| Case 83 | 21 | 14,368,320  | 48,100,155  | 1 | 1 | 2 | 0 |
| Case 83 | 22 | 16,114,244  | 51,195,728  | 1 | 1 | 2 | 0 |
| Case 83 | X  | 2,700,157   | 58,488,110  | 1 | 1 | 2 | 0 |
| Case 83 | X  | 61,694,576  | 154,898,561 | 1 | 1 | 2 | 0 |
| Case 84 | 1  | 82,154      | 2,106,747   | 2 | 1 | 3 | 0 |
| Case 84 | 1  | 2,117,558   | 2,306,695   | 3 | 2 | 5 | 0 |
| Case 84 | 1  | 2,306,972   | 8,871,690   | 2 | 1 | 3 | 0 |
| Case 84 | 1  | 8,871,965   | 9,009,444   | 3 | 1 | 4 | 0 |
| Case 84 | 1  | 9,009,451   | 12,097,568  | 2 | 1 | 3 | 0 |
| Case 84 | 1  | 12,105,048  | 12,620,545  | 3 | 1 | 4 | 0 |
| Case 84 | 1  | 12,625,101  | 15,687,059  | 2 | 1 | 3 | 0 |
| Case 84 | 1  | 15,687,814  | 17,281,235  | 2 | 2 | 4 | 0 |

|         |   |             |             |   |   |   |   |
|---------|---|-------------|-------------|---|---|---|---|
| Case 84 | 1 | 17,281,359  | 23,234,569  | 2 | 1 | 3 | 0 |
| Case 84 | 1 | 23,238,023  | 23,435,669  | 3 | 1 | 4 | 0 |
| Case 84 | 1 | 23,464,974  | 31,769,528  | 2 | 1 | 3 | 0 |
| Case 84 | 1 | 31,770,944  | 31,795,460  | 3 | 1 | 4 | 0 |
| Case 84 | 1 | 31,805,314  | 31,909,124  | 4 | 1 | 5 | 0 |
| Case 84 | 1 | 31,910,482  | 32,038,787  | 5 | 2 | 7 | 0 |
| Case 84 | 1 | 32,042,268  | 32,280,369  | 3 | 1 | 4 | 0 |
| Case 84 | 1 | 32,280,610  | 36,527,329  | 2 | 1 | 3 | 0 |
| Case 84 | 1 | 36,532,316  | 36,563,279  | 2 | 0 | 2 | 1 |
| Case 84 | 1 | 36,563,467  | 59,286,691  | 2 | 1 | 3 | 0 |
| Case 84 | 1 | 59,301,218  | 59,467,670  | 4 | 1 | 5 | 0 |
| Case 84 | 1 | 59,470,439  | 60,099,282  | 2 | 1 | 3 | 0 |
| Case 84 | 1 | 60,100,662  | 60,506,761  | 4 | 1 | 5 | 0 |
| Case 84 | 1 | 60,520,956  | 121,346,616 | 2 | 1 | 3 | 0 |
| Case 84 | 1 | 142,649,718 | 157,101,245 | 2 | 1 | 3 | 0 |
| Case 84 | 1 | 157,102,453 | 157,202,651 | 3 | 1 | 4 | 0 |
| Case 84 | 1 | 157,203,517 | 161,130,638 | 2 | 1 | 3 | 0 |
| Case 84 | 1 | 161,131,024 | 162,602,394 | 2 | 2 | 4 | 0 |
| Case 84 | 1 | 162,606,728 | 171,543,476 | 2 | 1 | 3 | 0 |
| Case 84 | 1 | 171,543,863 | 171,707,490 | 3 | 1 | 4 | 0 |
| Case 84 | 1 | 171,710,405 | 173,187,264 | 2 | 1 | 3 | 0 |
| Case 84 | 1 | 173,189,389 | 177,968,616 | 2 | 0 | 2 | 1 |
| Case 84 | 1 | 177,969,239 | 177,976,440 | 3 | 1 | 4 | 0 |
| Case 84 | 1 | 177,981,232 | 205,000,643 | 2 | 0 | 2 | 1 |
| Case 84 | 1 | 205,007,950 | 205,462,914 | 3 | 1 | 4 | 0 |
| Case 84 | 1 | 205,464,991 | 217,805,135 | 2 | 1 | 3 | 0 |
| Case 84 | 1 | 217,822,294 | 226,065,538 | 2 | 2 | 4 | 0 |
| Case 84 | 1 | 226,065,755 | 226,421,157 | 3 | 2 | 5 | 0 |
| Case 84 | 1 | 226,428,699 | 245,594,106 | 2 | 2 | 4 | 0 |
| Case 84 | 1 | 245,594,168 | 245,655,241 | 2 | 1 | 3 | 0 |
| Case 84 | 1 | 245,663,519 | 247,422,297 | 2 | 2 | 4 | 0 |
| Case 84 | 1 | 247,436,234 | 249,218,992 | 2 | 0 | 2 | 1 |
| Case 84 | 2 | 18,674      | 11,398,736  | 2 | 0 | 2 | 1 |
| Case 84 | 2 | 11,401,165  | 11,710,716  | 4 | 0 | 4 | 1 |
| Case 84 | 2 | 11,715,542  | 20,166,628  | 2 | 0 | 2 | 1 |
| Case 84 | 2 | 20,173,255  | 20,595,958  | 4 | 0 | 4 | 1 |
| Case 84 | 2 | 20,596,551  | 23,689,034  | 2 | 0 | 2 | 1 |
| Case 84 | 2 | 23,692,679  | 23,932,461  | 3 | 0 | 3 | 1 |
| Case 84 | 2 | 23,947,589  | 24,205,852  | 2 | 0 | 2 | 1 |
| Case 84 | 2 | 24,222,712  | 24,256,071  | 4 | 0 | 4 | 1 |
| Case 84 | 2 | 24,260,578  | 24,799,847  | 2 | 0 | 2 | 1 |
| Case 84 | 2 | 24,807,533  | 28,387,088  | 2 | 2 | 4 | 0 |
| Case 84 | 2 | 28,387,200  | 28,686,128  | 3 | 2 | 5 | 0 |
| Case 84 | 2 | 28,686,332  | 38,268,718  | 2 | 2 | 4 | 0 |
| Case 84 | 2 | 38,272,672  | 38,405,869  | 3 | 2 | 5 | 0 |
| Case 84 | 2 | 38,407,719  | 54,362,591  | 2 | 2 | 4 | 0 |
| Case 84 | 2 | 54,362,975  | 54,995,746  | 3 | 2 | 5 | 0 |
| Case 84 | 2 | 55,001,405  | 69,915,375  | 2 | 2 | 4 | 0 |
| Case 84 | 2 | 69,916,099  | 69,955,760  | 4 | 3 | 7 | 0 |
| Case 84 | 2 | 69,969,918  | 70,052,624  | 3 | 3 | 6 | 0 |
| Case 84 | 2 | 70,056,365  | 70,141,146  | 4 | 2 | 6 | 0 |
| Case 84 | 2 | 70,152,957  | 88,541,437  | 2 | 2 | 4 | 0 |
| Case 84 | 2 | 88,541,669  | 92,081,640  | 2 | 1 | 3 | 0 |
| Case 84 | 2 | 95,429,424  | 96,873,982  | 2 | 1 | 3 | 0 |
| Case 84 | 2 | 96,904,127  | 97,335,865  | 2 | 2 | 4 | 0 |
| Case 84 | 2 | 97,350,120  | 102,730,440 | 2 | 1 | 3 | 0 |
| Case 84 | 2 | 102,732,778 | 102,746,083 | 3 | 2 | 5 | 0 |
| Case 84 | 2 | 102,746,276 | 120,343,832 | 2 | 1 | 3 | 0 |
| Case 84 | 2 | 120,345,917 | 122,591,071 | 2 | 2 | 4 | 0 |
| Case 84 | 2 | 122,598,583 | 134,913,954 | 2 | 1 | 3 | 0 |
| Case 84 | 2 | 134,917,005 | 135,012,114 | 1 | 0 | 1 | 0 |



|         |   |             |             |   |   |   |   |
|---------|---|-------------|-------------|---|---|---|---|
| Case 84 | 2 | 135,017,074 | 141,951,944 | 2 | 1 | 3 | 0 |
| Case 84 | 2 | 141,952,467 | 144,159,751 | 2 | 2 | 4 | 0 |
| Case 84 | 2 | 144,166,523 | 206,630,887 | 2 | 1 | 3 | 0 |
| Case 84 | 2 | 206,631,254 | 206,892,937 | 3 | 1 | 4 | 0 |
| Case 84 | 2 | 206,893,042 | 208,971,007 | 2 | 1 | 3 | 0 |
| Case 84 | 2 | 208,974,411 | 209,087,335 | 3 | 1 | 4 | 0 |
| Case 84 | 2 | 209,093,069 | 239,113,794 | 2 | 1 | 3 | 0 |
| Case 84 | 2 | 239,120,652 | 239,318,389 | 2 | 2 | 4 | 0 |
| Case 84 | 2 | 239,322,485 | 243,048,760 | 2 | 1 | 3 | 0 |
| Case 84 | 3 | 61,495      | 9,990,998   | 3 | 0 | 3 | 1 |
| Case 84 | 3 | 9,991,040   | 10,335,786  | 4 | 0 | 4 | 1 |
| Case 84 | 3 | 10,341,082  | 48,759,562  | 3 | 0 | 3 | 1 |
| Case 84 | 3 | 48,787,219  | 51,772,347  | 1 | 0 | 1 | 0 |
| Case 84 | 3 | 51,802,912  | 54,483,667  | 4 | 0 | 4 | 1 |
| Case 84 | 3 | 54,484,118  | 60,364,830  | 3 | 0 | 3 | 1 |
| Case 84 | 3 | 60,370,362  | 60,554,521  | 0 | 0 | 0 | 0 |
| Case 84 | 3 | 60,557,685  | 60,600,915  | 2 | 1 | 3 | 0 |
| Case 84 | 3 | 60,602,816  | 60,630,360  | 0 | 0 | 0 | 0 |
| Case 84 | 3 | 60,631,936  | 61,232,197  | 3 | 0 | 3 | 1 |
| Case 84 | 3 | 61,236,328  | 65,547,455  | 2 | 0 | 2 | 1 |
| Case 84 | 3 | 65,560,167  | 65,809,842  | 3 | 0 | 3 | 1 |
| Case 84 | 3 | 65,812,625  | 90,442,925  | 2 | 0 | 2 | 1 |
| Case 84 | 3 | 93,537,290  | 94,625,622  | 3 | 0 | 3 | 1 |
| Case 84 | 3 | 94,640,761  | 101,231,921 | 2 | 1 | 3 | 0 |
| Case 84 | 3 | 101,232,736 | 114,205,687 | 3 | 1 | 4 | 0 |
| Case 84 | 3 | 114,208,597 | 114,714,244 | 2 | 1 | 3 | 0 |
| Case 84 | 3 | 114,730,257 | 127,470,166 | 3 | 1 | 4 | 0 |
| Case 84 | 3 | 127,473,488 | 127,655,873 | 4 | 2 | 6 | 0 |
| Case 84 | 3 | 127,662,082 | 128,266,502 | 3 | 1 | 4 | 0 |
| Case 84 | 3 | 128,272,481 | 128,525,253 | 5 | 0 | 5 | 1 |
| Case 84 | 3 | 128,527,929 | 197,838,262 | 3 | 1 | 4 | 0 |
| Case 84 | 4 | 71,566      | 494,188     | 1 | 0 | 1 | 0 |
| Case 84 | 4 | 494,194     | 2,689,449   | 2 | 1 | 3 | 0 |
| Case 84 | 4 | 2,691,411   | 39,436,019  | 2 | 0 | 2 | 1 |
| Case 84 | 4 | 39,438,149  | 39,586,775  | 4 | 0 | 4 | 1 |
| Case 84 | 4 | 39,600,010  | 41,074,389  | 2 | 0 | 2 | 1 |
| Case 84 | 4 | 41,076,288  | 43,254,889  | 1 | 0 | 1 | 0 |
| Case 84 | 4 | 43,279,788  | 49,620,898  | 2 | 0 | 2 | 1 |
| Case 84 | 4 | 52,697,856  | 77,159,700  | 2 | 0 | 2 | 1 |
| Case 84 | 4 | 77,167,242  | 77,552,782  | 4 | 0 | 4 | 1 |
| Case 84 | 4 | 77,555,857  | 115,506,203 | 2 | 0 | 2 | 1 |
| Case 84 | 4 | 115,513,240 | 116,013,647 | 4 | 0 | 4 | 1 |
| Case 84 | 4 | 116,028,808 | 119,785,381 | 2 | 0 | 2 | 1 |
| Case 84 | 4 | 119,789,448 | 119,867,342 | 2 | 2 | 4 | 0 |
| Case 84 | 4 | 119,873,248 | 142,484,038 | 2 | 0 | 2 | 1 |
| Case 84 | 4 | 142,487,363 | 144,574,139 | 2 | 2 | 4 | 0 |
| Case 84 | 4 | 144,575,873 | 148,280,874 | 2 | 0 | 2 | 1 |
| Case 84 | 4 | 148,288,067 | 149,654,577 | 2 | 2 | 4 | 0 |
| Case 84 | 4 | 149,690,361 | 190,963,766 | 2 | 0 | 2 | 1 |
| Case 84 | 5 | 38,139      | 14,509,966  | 4 | 1 | 5 | 0 |
| Case 84 | 5 | 14,514,308  | 14,711,332  | 6 | 1 | 7 | 0 |
| Case 84 | 5 | 14,713,681  | 46,399,093  | 5 | 1 | 6 | 0 |
| Case 84 | 5 | 49,457,282  | 58,676,049  | 1 | 1 | 2 | 0 |
| Case 84 | 5 | 58,676,173  | 72,569,945  | 1 | 0 | 1 | 0 |
| Case 84 | 5 | 72,573,021  | 73,460,035  | 1 | 1 | 2 | 0 |
| Case 84 | 5 | 73,460,615  | 84,748,969  | 2 | 1 | 3 | 0 |
| Case 84 | 5 | 84,774,104  | 84,872,810  | 1 | 0 | 1 | 0 |
| Case 84 | 5 | 84,873,823  | 106,230,898 | 2 | 1 | 3 | 0 |
| Case 84 | 5 | 106,241,073 | 106,415,368 | 3 | 1 | 4 | 0 |
| Case 84 | 5 | 106,420,589 | 108,784,799 | 2 | 1 | 3 | 0 |
| Case 84 | 5 | 108,799,341 | 112,204,896 | 2 | 0 | 2 | 1 |

|         |   |             |             |   |   |   |   |
|---------|---|-------------|-------------|---|---|---|---|
| Case 84 | 5 | 112,212,151 | 132,959,138 | 2 | 1 | 3 | 0 |
| Case 84 | 5 | 132,971,131 | 133,101,137 | 3 | 1 | 4 | 0 |
| Case 84 | 5 | 133,101,257 | 141,325,280 | 2 | 1 | 3 | 0 |
| Case 84 | 5 | 141,329,059 | 142,031,751 | 1 | 0 | 1 | 0 |
| Case 84 | 5 | 142,043,326 | 142,270,301 | 2 | 0 | 2 | 1 |
| Case 84 | 5 | 142,277,132 | 149,753,035 | 2 | 1 | 3 | 0 |
| Case 84 | 5 | 149,753,894 | 149,971,345 | 2 | 2 | 4 | 0 |
| Case 84 | 5 | 149,972,167 | 180,693,127 | 2 | 1 | 3 | 0 |
| Case 84 | 6 | 108,666     | 24,358,063  | 2 | 1 | 3 | 0 |
| Case 84 | 6 | 24,377,143  | 24,418,463  | 3 | 1 | 4 | 0 |
| Case 84 | 6 | 24,420,113  | 32,751,416  | 2 | 1 | 3 | 0 |
| Case 84 | 6 | 32,751,691  | 32,823,948  | 2 | 2 | 4 | 0 |
| Case 84 | 6 | 32,824,318  | 32,831,247  | 2 | 1 | 3 | 0 |
| Case 84 | 6 | 32,832,667  | 33,043,930  | 2 | 2 | 4 | 0 |
| Case 84 | 6 | 33,044,257  | 41,364,110  | 2 | 1 | 3 | 0 |
| Case 84 | 6 | 41,364,255  | 41,520,417  | 2 | 2 | 4 | 0 |
| Case 84 | 6 | 41,533,556  | 47,243,798  | 2 | 1 | 3 | 0 |
| Case 84 | 6 | 47,243,999  | 47,541,893  | 3 | 1 | 4 | 0 |
| Case 84 | 6 | 47,541,940  | 58,752,089  | 2 | 1 | 3 | 0 |
| Case 84 | 6 | 61,891,118  | 101,103,660 | 2 | 1 | 3 | 0 |
| Case 84 | 6 | 101,109,175 | 101,576,535 | 1 | 0 | 1 | 0 |
| Case 84 | 6 | 101,583,773 | 160,147,630 | 2 | 1 | 3 | 0 |
| Case 84 | 6 | 160,159,034 | 169,393,301 | 1 | 1 | 2 | 0 |
| Case 84 | 6 | 169,393,766 | 169,844,174 | 3 | 1 | 4 | 0 |
| Case 84 | 6 | 169,853,296 | 170,687,671 | 1 | 1 | 2 | 0 |
| Case 84 | 6 | 170,694,124 | 170,980,171 | 1 | 0 | 1 | 0 |
| Case 84 | 7 | 44,935      | 2,608,634   | 2 | 1 | 3 | 0 |
| Case 84 | 7 | 2,609,309   | 2,696,150   | 2 | 0 | 2 | 1 |
| Case 84 | 7 | 2,698,634   | 16,656,546  | 2 | 1 | 3 | 0 |
| Case 84 | 7 | 16,662,008  | 17,115,823  | 4 | 1 | 5 | 0 |
| Case 84 | 7 | 17,116,201  | 19,916,190  | 2 | 1 | 3 | 0 |
| Case 84 | 7 | 19,938,943  | 20,010,778  | 4 | 1 | 5 | 0 |
| Case 84 | 7 | 20,018,112  | 33,061,694  | 2 | 1 | 3 | 0 |
| Case 84 | 7 | 33,070,796  | 58,019,061  | 3 | 1 | 4 | 0 |
| Case 84 | 7 | 61,056,053  | 73,124,558  | 3 | 1 | 4 | 0 |
| Case 84 | 7 | 73,125,179  | 73,359,124  | 4 | 1 | 5 | 0 |
| Case 84 | 7 | 73,376,167  | 75,951,230  | 3 | 1 | 4 | 0 |
| Case 84 | 7 | 75,953,297  | 76,134,915  | 4 | 1 | 5 | 0 |
| Case 84 | 7 | 76,137,375  | 76,710,152  | 6 | 2 | 8 | 0 |
| Case 84 | 7 | 76,712,801  | 93,131,162  | 3 | 1 | 4 | 0 |
| Case 84 | 7 | 93,138,358  | 96,126,368  | 3 | 2 | 5 | 0 |
| Case 84 | 7 | 96,130,638  | 103,138,572 | 3 | 1 | 4 | 0 |
| Case 84 | 7 | 103,141,147 | 104,500,549 | 3 | 2 | 5 | 0 |
| Case 84 | 7 | 104,503,813 | 127,772,339 | 3 | 1 | 4 | 0 |
| Case 84 | 7 | 127,773,388 | 128,323,110 | 4 | 1 | 5 | 0 |
| Case 84 | 7 | 128,348,405 | 132,817,561 | 3 | 1 | 4 | 0 |
| Case 84 | 7 | 132,820,026 | 133,361,412 | 4 | 1 | 5 | 0 |
| Case 84 | 7 | 133,388,056 | 140,505,189 | 3 | 1 | 4 | 0 |
| Case 84 | 7 | 140,544,165 | 141,341,613 | 2 | 1 | 3 | 0 |
| Case 84 | 7 | 141,348,813 | 141,945,160 | 4 | 1 | 5 | 0 |
| Case 84 | 7 | 141,947,082 | 141,952,110 | 6 | 1 | 7 | 0 |
| Case 84 | 7 | 141,952,308 | 142,380,488 | 5 | 1 | 6 | 0 |
| Case 84 | 7 | 142,384,755 | 142,424,843 | 6 | 1 | 7 | 0 |
| Case 84 | 7 | 142,434,960 | 143,748,011 | 4 | 1 | 5 | 0 |
| Case 84 | 7 | 143,748,098 | 143,875,539 | 5 | 1 | 6 | 0 |
| Case 84 | 7 | 143,951,888 | 159,119,486 | 2 | 1 | 3 | 0 |
| Case 84 | 8 | 164,984     | 22,388,857  | 2 | 0 | 2 | 1 |
| Case 84 | 8 | 22,389,749  | 22,571,466  | 3 | 0 | 3 | 1 |
| Case 84 | 8 | 22,572,116  | 43,791,691  | 2 | 0 | 2 | 1 |
| Case 84 | 8 | 46,886,735  | 46,886,735  | 2 | 0 | 2 | 1 |
| Case 84 | 8 | 46,942,842  | 48,722,783  | 5 | 1 | 6 | 0 |

|         |    |             |             |   |   |   |   |
|---------|----|-------------|-------------|---|---|---|---|
| Case 84 | 8  | 48,730,003  | 57,942,358  | 5 | 0 | 5 | 1 |
| Case 84 | 8  | 57,943,607  | 61,926,797  | 6 | 0 | 6 | 1 |
| Case 84 | 8  | 61,929,772  | 66,347,828  | 7 | 0 | 7 | 1 |
| Case 84 | 8  | 66,355,062  | 75,292,492  | 6 | 0 | 6 | 1 |
| Case 84 | 8  | 75,294,975  | 77,063,605  | 7 | 0 | 7 | 1 |
| Case 84 | 8  | 77,077,752  | 81,745,785  | 6 | 0 | 6 | 1 |
| Case 84 | 8  | 81,751,247  | 81,887,806  | 8 | 0 | 8 | 1 |
| Case 84 | 8  | 81,888,847  | 94,627,082  | 6 | 0 | 6 | 1 |
| Case 84 | 8  | 94,633,233  | 102,281,315 | 7 | 0 | 7 | 1 |
| Case 84 | 8  | 102,281,374 | 109,831,197 | 6 | 0 | 6 | 1 |
| Case 84 | 8  | 109,855,813 | 110,622,831 | 7 | 0 | 7 | 1 |
| Case 84 | 8  | 110,627,005 | 110,909,309 | 9 | 0 | 9 | 1 |
| Case 84 | 8  | 110,915,398 | 115,548,047 | 7 | 0 | 7 | 1 |
| Case 84 | 8  | 115,553,747 | 124,209,157 | 6 | 0 | 6 | 1 |
| Case 84 | 8  | 124,213,844 | 132,789,352 | 7 | 0 | 7 | 1 |
| Case 84 | 8  | 132,790,095 | 134,272,549 | 5 | 0 | 5 | 1 |
| Case 84 | 8  | 134,273,868 | 134,513,219 | 6 | 0 | 6 | 1 |
| Case 84 | 8  | 134,513,350 | 137,769,663 | 5 | 0 | 5 | 1 |
| Case 84 | 8  | 137,771,602 | 138,890,763 | 6 | 0 | 6 | 1 |
| Case 84 | 8  | 138,902,764 | 146,293,414 | 5 | 0 | 5 | 1 |
| Case 84 | 9  | 46,587      | 35,518,997  | 2 | 0 | 2 | 1 |
| Case 84 | 9  | 35,522,318  | 35,778,800  | 4 | 0 | 4 | 1 |
| Case 84 | 9  | 35,779,571  | 46,944,322  | 2 | 0 | 2 | 1 |
| Case 84 | 9  | 65,629,772  | 71,131,098  | 2 | 0 | 2 | 1 |
| Case 84 | 9  | 71,137,232  | 71,396,426  | 4 | 0 | 4 | 1 |
| Case 84 | 9  | 71,397,734  | 94,625,960  | 2 | 0 | 2 | 1 |
| Case 84 | 9  | 94,626,543  | 94,769,170  | 3 | 0 | 3 | 1 |
| Case 84 | 9  | 94,775,387  | 97,409,437  | 2 | 0 | 2 | 1 |
| Case 84 | 9  | 97,409,771  | 97,535,396  | 4 | 0 | 4 | 1 |
| Case 84 | 9  | 97,549,812  | 109,923,051 | 2 | 0 | 2 | 1 |
| Case 84 | 9  | 109,926,563 | 110,226,138 | 4 | 0 | 4 | 1 |
| Case 84 | 9  | 110,229,609 | 114,195,587 | 2 | 0 | 2 | 1 |
| Case 84 | 9  | 114,220,603 | 116,823,377 | 4 | 0 | 4 | 1 |
| Case 84 | 9  | 116,823,802 | 131,565,571 | 2 | 0 | 2 | 1 |
| Case 84 | 9  | 131,565,590 | 131,721,171 | 3 | 0 | 3 | 1 |
| Case 84 | 9  | 131,730,791 | 136,259,419 | 2 | 0 | 2 | 1 |
| Case 84 | 9  | 136,259,809 | 136,324,239 | 3 | 0 | 3 | 1 |
| Case 84 | 9  | 136,325,282 | 141,066,491 | 2 | 0 | 2 | 1 |
| Case 84 | 10 | 98,087      | 4,076,637   | 4 | 1 | 5 | 0 |
| Case 84 | 10 | 4,079,520   | 5,336,374   | 5 | 1 | 6 | 0 |
| Case 84 | 10 | 5,337,743   | 19,118,287  | 4 | 1 | 5 | 0 |
| Case 84 | 10 | 19,120,169  | 19,451,728  | 6 | 1 | 7 | 0 |
| Case 84 | 10 | 19,463,367  | 26,422,301  | 5 | 1 | 6 | 0 |
| Case 84 | 10 | 26,432,389  | 29,523,746  | 4 | 3 | 7 | 0 |
| Case 84 | 10 | 29,524,450  | 31,457,279  | 3 | 3 | 6 | 0 |
| Case 84 | 10 | 31,461,599  | 35,567,127  | 5 | 1 | 6 | 0 |
| Case 84 | 10 | 35,577,194  | 37,665,513  | 6 | 1 | 7 | 0 |
| Case 84 | 10 | 37,665,810  | 39,088,829  | 5 | 1 | 6 | 0 |
| Case 84 | 10 | 39,097,912  | 39,097,912  | 2 | 0 | 2 | 1 |
| Case 84 | 10 | 42,436,301  | 111,335,861 | 2 | 0 | 2 | 1 |
| Case 84 | 10 | 111,336,595 | 124,140,430 | 3 | 0 | 3 | 1 |
| Case 84 | 10 | 124,147,588 | 124,523,514 | 4 | 0 | 4 | 1 |
| Case 84 | 10 | 124,524,241 | 135,477,883 | 2 | 0 | 2 | 1 |
| Case 84 | 11 | 193,146     | 20,915,524  | 2 | 1 | 3 | 0 |
| Case 84 | 11 | 20,925,039  | 21,587,453  | 2 | 0 | 2 | 1 |
| Case 84 | 11 | 21,588,442  | 50,296,502  | 2 | 1 | 3 | 0 |
| Case 84 | 11 | 50,325,741  | 51,591,253  | 2 | 0 | 2 | 1 |
| Case 84 | 11 | 54,794,237  | 69,224,506  | 2 | 0 | 2 | 1 |
| Case 84 | 11 | 69,228,367  | 69,378,736  | 4 | 0 | 4 | 1 |
| Case 84 | 11 | 69,382,767  | 71,864,717  | 2 | 0 | 2 | 1 |
| Case 84 | 11 | 71,872,777  | 76,801,982  | 2 | 1 | 3 | 0 |

|         |    |             |             |   |   |   |   |
|---------|----|-------------|-------------|---|---|---|---|
| Case 84 | 11 | 76,804,131  | 76,992,664  | 3 | 1 | 4 | 0 |
| Case 84 | 11 | 76,996,323  | 117,909,799 | 2 | 1 | 3 | 0 |
| Case 84 | 11 | 117,911,367 | 118,279,936 | 3 | 2 | 5 | 0 |
| Case 84 | 11 | 118,285,995 | 134,934,063 | 2 | 1 | 3 | 0 |
| Case 84 | 12 | 191,619     | 19,892,640  | 2 | 1 | 3 | 0 |
| Case 84 | 12 | 19,893,246  | 19,957,161  | 3 | 2 | 5 | 0 |
| Case 84 | 12 | 19,964,114  | 20,834,635  | 2 | 2 | 4 | 0 |
| Case 84 | 12 | 20,839,851  | 29,065,867  | 2 | 1 | 3 | 0 |
| Case 84 | 12 | 29,080,104  | 29,468,987  | 3 | 2 | 5 | 0 |
| Case 84 | 12 | 29,469,774  | 30,946,460  | 2 | 1 | 3 | 0 |
| Case 84 | 12 | 30,949,511  | 31,163,186  | 2 | 2 | 4 | 0 |
| Case 84 | 12 | 31,168,019  | 31,249,834  | 3 | 2 | 5 | 0 |
| Case 84 | 12 | 31,256,795  | 34,810,203  | 2 | 1 | 3 | 0 |
| Case 84 | 12 | 34,819,926  | 34,853,011  | 1 | 1 | 2 | 0 |
| Case 84 | 12 | 37,876,400  | 38,416,139  | 1 | 1 | 2 | 0 |
| Case 84 | 12 | 38,424,982  | 133,810,935 | 2 | 1 | 3 | 0 |
| Case 84 | 13 | 19,058,717  | 24,387,570  | 3 | 0 | 3 | 1 |
| Case 84 | 13 | 24,396,149  | 24,798,995  | 4 | 0 | 4 | 1 |
| Case 84 | 13 | 24,800,063  | 28,388,149  | 3 | 0 | 3 | 1 |
| Case 84 | 13 | 28,393,672  | 28,500,496  | 4 | 0 | 4 | 1 |
| Case 84 | 13 | 28,514,849  | 106,393,146 | 3 | 0 | 3 | 1 |
| Case 84 | 13 | 106,393,442 | 106,670,282 | 4 | 0 | 4 | 1 |
| Case 84 | 13 | 106,684,468 | 113,536,627 | 3 | 0 | 3 | 1 |
| Case 84 | 13 | 113,540,004 | 113,717,098 | 4 | 0 | 4 | 1 |
| Case 84 | 13 | 113,717,244 | 115,103,529 | 3 | 0 | 3 | 1 |
| Case 84 | 14 | 19,280,733  | 20,470,737  | 3 | 2 | 5 | 0 |
| Case 84 | 14 | 20,470,903  | 22,425,847  | 2 | 1 | 3 | 0 |
| Case 84 | 14 | 22,427,444  | 22,970,327  | 2 | 2 | 4 | 0 |
| Case 84 | 14 | 22,972,815  | 35,649,943  | 2 | 1 | 3 | 0 |
| Case 84 | 14 | 35,661,048  | 37,584,981  | 3 | 2 | 5 | 0 |
| Case 84 | 14 | 37,587,697  | 90,208,263  | 2 | 1 | 3 | 0 |
| Case 84 | 14 | 90,209,466  | 91,770,261  | 3 | 1 | 4 | 0 |
| Case 84 | 14 | 91,772,204  | 102,600,112 | 2 | 1 | 3 | 0 |
| Case 84 | 14 | 102,605,127 | 103,009,367 | 3 | 1 | 4 | 0 |
| Case 84 | 14 | 103,018,554 | 103,133,060 | 3 | 2 | 5 | 0 |
| Case 84 | 14 | 103,154,191 | 103,342,741 | 3 | 1 | 4 | 0 |
| Case 84 | 14 | 103,345,467 | 103,694,387 | 2 | 1 | 3 | 0 |
| Case 84 | 14 | 103,694,638 | 103,783,847 | 4 | 1 | 5 | 0 |
| Case 84 | 14 | 103,784,918 | 103,916,916 | 4 | 2 | 6 | 0 |
| Case 84 | 14 | 103,918,029 | 107,287,663 | 2 | 1 | 3 | 0 |
| Case 84 | 15 | 20,034,919  | 34,385,784  | 2 | 0 | 2 | 1 |
| Case 84 | 15 | 34,387,365  | 35,070,865  | 3 | 0 | 3 | 1 |
| Case 84 | 15 | 35,071,297  | 67,400,490  | 2 | 0 | 2 | 1 |
| Case 84 | 15 | 67,407,899  | 67,629,175  | 1 | 0 | 1 | 0 |
| Case 84 | 15 | 67,629,335  | 102,461,162 | 2 | 0 | 2 | 1 |
| Case 84 | 16 | 88,165      | 25,563,680  | 2 | 0 | 2 | 1 |
| Case 84 | 16 | 25,565,967  | 29,824,508  | 2 | 2 | 4 | 0 |
| Case 84 | 16 | 29,824,809  | 35,285,582  | 2 | 0 | 2 | 1 |
| Case 84 | 16 | 46,450,037  | 51,276,862  | 2 | 0 | 2 | 1 |
| Case 84 | 16 | 51,279,056  | 51,451,319  | 2 | 1 | 3 | 0 |
| Case 84 | 16 | 51,457,948  | 55,594,811  | 2 | 0 | 2 | 1 |
| Case 84 | 16 | 55,600,672  | 57,422,519  | 2 | 2 | 4 | 0 |
| Case 84 | 16 | 57,436,153  | 57,622,522  | 4 | 1 | 5 | 0 |
| Case 84 | 16 | 57,626,911  | 57,685,510  | 3 | 2 | 5 | 0 |
| Case 84 | 16 | 57,687,314  | 57,729,576  | 2 | 1 | 3 | 0 |
| Case 84 | 16 | 57,731,854  | 61,461,435  | 2 | 0 | 2 | 1 |
| Case 84 | 16 | 61,465,121  | 61,887,369  | 2 | 1 | 3 | 0 |
| Case 84 | 16 | 61,889,904  | 66,608,800  | 2 | 0 | 2 | 1 |
| Case 84 | 16 | 66,609,668  | 69,067,538  | 2 | 1 | 3 | 0 |
| Case 84 | 16 | 69,074,247  | 69,497,810  | 3 | 0 | 3 | 1 |
| Case 84 | 16 | 69,509,506  | 69,590,366  | 5 | 0 | 5 | 1 |

|         |    |            |            |   |   |   |   |
|---------|----|------------|------------|---|---|---|---|
| Case 84 | 16 | 69,597,882 | 70,286,631 | 2 | 0 | 2 | 1 |
| Case 84 | 16 | 70,286,740 | 75,924,274 | 4 | 0 | 4 | 1 |
| Case 84 | 16 | 75,928,610 | 76,581,602 | 3 | 2 | 5 | 0 |
| Case 84 | 16 | 76,587,183 | 77,637,507 | 3 | 0 | 3 | 1 |
| Case 84 | 16 | 77,639,184 | 78,684,329 | 3 | 2 | 5 | 0 |
| Case 84 | 16 | 78,688,144 | 78,718,027 | 3 | 1 | 4 | 0 |
| Case 84 | 16 | 78,719,199 | 80,513,030 | 3 | 2 | 5 | 0 |
| Case 84 | 16 | 80,514,918 | 82,519,228 | 4 | 0 | 4 | 1 |
| Case 84 | 16 | 82,521,530 | 83,310,856 | 3 | 2 | 5 | 0 |
| Case 84 | 16 | 83,316,624 | 84,221,962 | 3 | 0 | 3 | 1 |
| Case 84 | 16 | 84,223,361 | 84,239,438 | 4 | 1 | 5 | 0 |
| Case 84 | 16 | 84,240,104 | 85,436,589 | 4 | 0 | 4 | 1 |
| Case 84 | 16 | 85,452,695 | 85,713,210 | 3 | 1 | 4 | 0 |
| Case 84 | 16 | 85,721,146 | 88,695,167 | 3 | 0 | 3 | 1 |
| Case 84 | 16 | 88,695,376 | 89,420,356 | 3 | 1 | 4 | 0 |
| Case 84 | 16 | 89,422,823 | 90,274,695 | 3 | 0 | 3 | 1 |
| Case 84 | 17 | 11,885     | 1,151,592  | 2 | 0 | 2 | 1 |
| Case 84 | 17 | 1,154,536  | 1,393,486  | 3 | 0 | 3 | 1 |
| Case 84 | 17 | 1,397,737  | 7,069,263  | 2 | 0 | 2 | 1 |
| Case 84 | 17 | 7,076,038  | 7,337,488  | 4 | 0 | 4 | 1 |
| Case 84 | 17 | 7,339,525  | 22,242,355 | 2 | 0 | 2 | 1 |
| Case 84 | 17 | 25,268,142 | 25,660,189 | 2 | 0 | 2 | 1 |
| Case 84 | 17 | 25,666,330 | 34,443,811 | 2 | 1 | 3 | 0 |
| Case 84 | 17 | 34,445,325 | 34,597,521 | 4 | 1 | 5 | 0 |
| Case 84 | 17 | 34,815,551 | 57,709,814 | 2 | 1 | 3 | 0 |
| Case 84 | 17 | 57,724,829 | 57,916,013 | 1 | 1 | 2 | 0 |
| Case 84 | 17 | 57,930,646 | 73,812,937 | 2 | 1 | 3 | 0 |
| Case 84 | 17 | 73,813,250 | 73,945,957 | 2 | 2 | 4 | 0 |
| Case 84 | 17 | 73,946,642 | 79,441,807 | 2 | 1 | 3 | 0 |
| Case 84 | 17 | 79,446,592 | 79,483,999 | 2 | 0 | 2 | 1 |
| Case 84 | 17 | 79,487,491 | 81,060,040 | 2 | 1 | 3 | 0 |
| Case 84 | 18 | 87,505     | 629,035    | 3 | 1 | 4 | 0 |
| Case 84 | 18 | 631,211    | 2,508,671  | 3 | 2 | 5 | 0 |
| Case 84 | 18 | 2,508,780  | 5,252,280  | 3 | 1 | 4 | 0 |
| Case 84 | 18 | 5,255,109  | 8,594,202  | 4 | 1 | 5 | 0 |
| Case 84 | 18 | 8,602,839  | 8,715,990  | 3 | 2 | 5 | 0 |
| Case 84 | 18 | 8,716,090  | 12,898,134 | 4 | 1 | 5 | 0 |
| Case 84 | 18 | 12,899,342 | 15,375,878 | 3 | 1 | 4 | 0 |
| Case 84 | 18 | 18,520,354 | 19,557,092 | 3 | 1 | 4 | 0 |
| Case 84 | 18 | 19,558,879 | 19,723,649 | 4 | 1 | 5 | 0 |
| Case 84 | 18 | 19,739,501 | 24,293,284 | 3 | 1 | 4 | 0 |
| Case 84 | 18 | 24,293,309 | 25,144,478 | 2 | 1 | 3 | 0 |
| Case 84 | 18 | 25,152,084 | 25,440,258 | 2 | 2 | 4 | 0 |
| Case 84 | 18 | 25,444,241 | 38,850,517 | 2 | 1 | 3 | 0 |
| Case 84 | 18 | 38,857,660 | 49,976,719 | 2 | 0 | 2 | 1 |
| Case 84 | 18 | 49,988,133 | 50,026,652 | 3 | 2 | 5 | 0 |
| Case 84 | 18 | 50,026,915 | 50,140,929 | 2 | 2 | 4 | 0 |
| Case 84 | 18 | 50,142,425 | 53,489,366 | 2 | 1 | 3 | 0 |
| Case 84 | 18 | 53,495,479 | 53,605,893 | 4 | 1 | 5 | 0 |
| Case 84 | 18 | 53,606,519 | 55,260,070 | 3 | 2 | 5 | 0 |
| Case 84 | 18 | 55,264,080 | 55,655,487 | 2 | 2 | 4 | 0 |
| Case 84 | 18 | 55,660,363 | 68,197,110 | 2 | 0 | 2 | 1 |
| Case 84 | 18 | 68,199,224 | 68,936,409 | 3 | 0 | 3 | 1 |
| Case 84 | 18 | 68,942,563 | 69,414,120 | 2 | 0 | 2 | 1 |
| Case 84 | 18 | 69,418,494 | 78,015,180 | 3 | 0 | 3 | 1 |
| Case 84 | 19 | 260,912    | 3,979,842  | 2 | 0 | 2 | 1 |
| Case 84 | 19 | 3,981,387  | 4,119,012  | 3 | 0 | 3 | 1 |
| Case 84 | 19 | 4,139,849  | 12,974,636 | 2 | 0 | 2 | 1 |
| Case 84 | 19 | 12,975,608 | 13,197,752 | 3 | 0 | 3 | 1 |
| Case 84 | 19 | 13,211,515 | 24,629,285 | 2 | 0 | 2 | 1 |
| Case 84 | 19 | 27,732,159 | 36,987,525 | 5 | 1 | 6 | 0 |

|         |    |            |            |   |   |   |   |
|---------|----|------------|------------|---|---|---|---|
| Case 84 | 19 | 37,004,938 | 38,292,369 | 7 | 1 | 8 | 0 |
| Case 84 | 19 | 38,293,963 | 38,709,609 | 6 | 1 | 7 | 0 |
| Case 84 | 19 | 38,713,568 | 39,294,769 | 3 | 1 | 4 | 0 |
| Case 84 | 19 | 39,296,319 | 39,331,195 | 4 | 1 | 5 | 0 |
| Case 84 | 19 | 39,334,830 | 57,099,817 | 3 | 1 | 4 | 0 |
| Case 84 | 19 | 57,100,894 | 59,097,160 | 2 | 1 | 3 | 0 |
| Case 84 | 20 | 63,244     | 1,248,286  | 4 | 0 | 4 | 1 |
| Case 84 | 20 | 1,250,463  | 1,941,488  | 3 | 1 | 4 | 0 |
| Case 84 | 20 | 1,942,718  | 2,625,211  | 4 | 0 | 4 | 1 |
| Case 84 | 20 | 2,630,285  | 5,800,572  | 3 | 2 | 5 | 0 |
| Case 84 | 20 | 5,809,016  | 6,813,845  | 3 | 3 | 6 | 0 |
| Case 84 | 20 | 6,819,428  | 7,376,672  | 3 | 2 | 5 | 0 |
| Case 84 | 20 | 7,380,416  | 7,497,194  | 5 | 2 | 7 | 0 |
| Case 84 | 20 | 7,497,772  | 8,121,097  | 4 | 2 | 6 | 0 |
| Case 84 | 20 | 8,124,354  | 8,822,308  | 3 | 2 | 5 | 0 |
| Case 84 | 20 | 8,824,117  | 10,379,471 | 3 | 3 | 6 | 0 |
| Case 84 | 20 | 10,383,981 | 11,347,455 | 3 | 2 | 5 | 0 |
| Case 84 | 20 | 11,367,780 | 11,703,372 | 4 | 0 | 4 | 1 |
| Case 84 | 20 | 11,716,825 | 11,742,799 | 4 | 1 | 5 | 0 |
| Case 84 | 20 | 11,748,386 | 11,939,516 | 4 | 0 | 4 | 1 |
| Case 84 | 20 | 11,942,854 | 11,970,685 | 4 | 1 | 5 | 0 |
| Case 84 | 20 | 11,971,675 | 12,173,825 | 3 | 0 | 3 | 1 |
| Case 84 | 20 | 12,175,478 | 13,078,275 | 3 | 2 | 5 | 0 |
| Case 84 | 20 | 13,078,747 | 13,765,892 | 3 | 3 | 6 | 0 |
| Case 84 | 20 | 13,765,895 | 14,727,386 | 3 | 2 | 5 | 0 |
| Case 84 | 20 | 14,729,891 | 14,931,186 | 2 | 0 | 2 | 1 |
| Case 84 | 20 | 14,936,935 | 15,375,124 | 3 | 1 | 4 | 0 |
| Case 84 | 20 | 15,375,822 | 15,649,366 | 2 | 2 | 4 | 0 |
| Case 84 | 20 | 15,651,887 | 17,721,590 | 3 | 2 | 5 | 0 |
| Case 84 | 20 | 17,725,675 | 17,931,095 | 3 | 3 | 6 | 0 |
| Case 84 | 20 | 17,933,320 | 19,583,374 | 3 | 2 | 5 | 0 |
| Case 84 | 20 | 19,585,661 | 26,293,985 | 4 | 0 | 4 | 1 |
| Case 84 | 20 | 29,425,357 | 32,110,204 | 4 | 0 | 4 | 1 |
| Case 84 | 20 | 32,140,287 | 32,449,329 | 7 | 1 | 8 | 0 |
| Case 84 | 20 | 32,452,215 | 32,527,128 | 5 | 2 | 7 | 0 |
| Case 84 | 20 | 32,535,305 | 32,996,559 | 3 | 1 | 4 | 0 |
| Case 84 | 20 | 33,000,437 | 39,465,634 | 4 | 0 | 4 | 1 |
| Case 84 | 20 | 39,469,504 | 40,769,924 | 3 | 2 | 5 | 0 |
| Case 84 | 20 | 40,775,576 | 43,701,355 | 4 | 0 | 4 | 1 |
| Case 84 | 20 | 43,704,937 | 46,156,099 | 3 | 1 | 4 | 0 |
| Case 84 | 20 | 46,163,799 | 47,701,339 | 3 | 2 | 5 | 0 |
| Case 84 | 20 | 47,701,589 | 47,740,944 | 4 | 3 | 7 | 0 |
| Case 84 | 20 | 47,749,585 | 48,027,837 | 4 | 1 | 5 | 0 |
| Case 84 | 20 | 48,030,010 | 50,181,272 | 3 | 1 | 4 | 0 |
| Case 84 | 20 | 50,181,785 | 51,740,178 | 3 | 3 | 6 | 0 |
| Case 84 | 20 | 51,741,616 | 54,998,544 | 3 | 1 | 4 | 0 |
| Case 84 | 20 | 55,006,888 | 58,842,929 | 4 | 0 | 4 | 1 |
| Case 84 | 20 | 58,848,067 | 62,948,788 | 3 | 2 | 5 | 0 |
| Case 84 | 21 | 10,827,533 | 10,971,337 | 2 | 1 | 3 | 0 |
| Case 84 | 21 | 14,368,320 | 18,579,240 | 2 | 1 | 3 | 0 |
| Case 84 | 21 | 18,585,356 | 18,650,176 | 3 | 1 | 4 | 0 |
| Case 84 | 21 | 18,652,994 | 29,275,627 | 2 | 1 | 3 | 0 |
| Case 84 | 21 | 29,299,378 | 29,850,549 | 1 | 0 | 1 | 0 |
| Case 84 | 21 | 29,853,103 | 34,586,183 | 2 | 1 | 3 | 0 |
| Case 84 | 21 | 34,588,494 | 34,799,322 | 3 | 1 | 4 | 0 |
| Case 84 | 21 | 34,804,538 | 42,841,988 | 2 | 1 | 3 | 0 |
| Case 84 | 21 | 42,842,203 | 43,162,155 | 2 | 2 | 4 | 0 |
| Case 84 | 21 | 43,162,356 | 44,358,783 | 2 | 1 | 3 | 0 |
| Case 84 | 21 | 44,360,107 | 44,764,895 | 3 | 1 | 4 | 0 |
| Case 84 | 21 | 44,768,562 | 48,100,155 | 2 | 1 | 3 | 0 |
| Case 84 | 22 | 16,114,244 | 21,927,064 | 2 | 0 | 2 | 1 |

|         |    |             |             |   |   |   |   |
|---------|----|-------------|-------------|---|---|---|---|
| Case 84 | 22 | 21,928,641  | 22,068,740  | 4 | 0 | 4 | 1 |
| Case 84 | 22 | 22,069,340  | 50,281,344  | 2 | 0 | 2 | 1 |
| Case 84 | 22 | 50,281,879  | 50,509,196  | 3 | 0 | 3 | 1 |
| Case 84 | 22 | 50,510,258  | 51,195,728  | 2 | 0 | 2 | 1 |
| Case 84 | X  | 2,700,157   | 3,533,962   | 2 | 0 | 2 | 1 |
| Case 84 | X  | 3,534,458   | 58,488,110  | 1 | 0 | 1 | 0 |
| Case 84 | X  | 61,694,576  | 154,898,561 | 1 | 0 | 1 | 0 |
| Case 85 | 1  | 82,154      | 121,346,616 | 1 | 1 | 2 | 0 |
| Case 85 | 1  | 142,649,718 | 249,218,992 | 1 | 1 | 2 | 0 |
| Case 85 | 2  | 18,674      | 92,081,640  | 1 | 1 | 2 | 0 |
| Case 85 | 2  | 95,429,424  | 243,048,760 | 1 | 1 | 2 | 0 |
| Case 85 | 3  | 61,495      | 90,442,925  | 1 | 1 | 2 | 0 |
| Case 85 | 3  | 93,537,290  | 113,187,981 | 1 | 1 | 2 | 0 |
| Case 85 | 3  | 113,207,804 | 113,268,970 | 2 | 1 | 3 | 0 |
| Case 85 | 3  | 113,269,201 | 197,838,262 | 1 | 1 | 2 | 0 |
| Case 85 | 4  | 71,566      | 49,620,898  | 1 | 1 | 2 | 0 |
| Case 85 | 4  | 52,697,856  | 190,963,766 | 1 | 1 | 2 | 0 |
| Case 85 | 5  | 38,139      | 46,399,093  | 1 | 1 | 2 | 0 |
| Case 85 | 5  | 49,457,282  | 180,693,127 | 1 | 1 | 2 | 0 |
| Case 85 | 6  | 108,666     | 58,752,089  | 1 | 1 | 2 | 0 |
| Case 85 | 6  | 61,891,118  | 170,980,171 | 1 | 1 | 2 | 0 |
| Case 85 | 7  | 44,935      | 58,019,061  | 1 | 1 | 2 | 0 |
| Case 85 | 7  | 61,056,053  | 159,119,486 | 1 | 1 | 2 | 0 |
| Case 85 | 8  | 164,984     | 43,791,691  | 1 | 1 | 2 | 0 |
| Case 85 | 8  | 46,886,735  | 146,293,414 | 1 | 1 | 2 | 0 |
| Case 85 | 9  | 46,587      | 46,944,322  | 1 | 1 | 2 | 0 |
| Case 85 | 9  | 65,629,772  | 141,066,491 | 1 | 1 | 2 | 0 |
| Case 85 | 10 | 98,087      | 39,097,912  | 1 | 1 | 2 | 0 |
| Case 85 | 10 | 42,436,301  | 135,477,883 | 1 | 1 | 2 | 0 |
| Case 85 | 11 | 193,146     | 10,510,272  | 1 | 1 | 2 | 0 |
| Case 85 | 11 | 10,511,142  | 10,545,404  | 2 | 1 | 3 | 0 |
| Case 85 | 11 | 10,552,213  | 51,591,253  | 1 | 1 | 2 | 0 |
| Case 85 | 11 | 54,794,237  | 134,934,063 | 1 | 1 | 2 | 0 |
| Case 85 | 12 | 191,619     | 34,853,011  | 1 | 1 | 2 | 0 |
| Case 85 | 12 | 37,876,400  | 133,810,935 | 1 | 1 | 2 | 0 |
| Case 85 | 13 | 19,058,717  | 115,103,529 | 1 | 1 | 2 | 0 |
| Case 85 | 14 | 19,280,733  | 107,287,663 | 1 | 1 | 2 | 0 |
| Case 85 | 15 | 20,034,919  | 102,461,162 | 1 | 1 | 2 | 0 |
| Case 85 | 16 | 88,165      | 35,285,582  | 1 | 1 | 2 | 0 |
| Case 85 | 16 | 46,450,037  | 90,274,695  | 1 | 1 | 2 | 0 |
| Case 85 | 17 | 11,885      | 22,242,355  | 1 | 1 | 2 | 0 |
| Case 85 | 17 | 25,268,142  | 81,060,040  | 1 | 1 | 2 | 0 |
| Case 85 | 18 | 87,505      | 15,375,878  | 1 | 1 | 2 | 0 |
| Case 85 | 18 | 18,520,354  | 78,015,180  | 1 | 1 | 2 | 0 |
| Case 85 | 19 | 260,912     | 24,629,285  | 1 | 1 | 2 | 0 |
| Case 85 | 19 | 27,732,159  | 59,097,160  | 1 | 1 | 2 | 0 |
| Case 85 | 20 | 63,244      | 26,293,985  | 1 | 1 | 2 | 0 |
| Case 85 | 20 | 29,425,357  | 62,948,788  | 1 | 1 | 2 | 0 |
| Case 85 | 21 | 10,827,533  | 10,971,337  | 1 | 1 | 2 | 0 |
| Case 85 | 21 | 14,368,320  | 48,100,155  | 1 | 1 | 2 | 0 |
| Case 85 | 22 | 16,114,244  | 51,195,728  | 1 | 1 | 2 | 0 |
| Case 85 | X  | 2,700,157   | 58,488,110  | 1 | 1 | 2 | 0 |
| Case 85 | X  | 61,694,576  | 154,898,561 | 1 | 1 | 2 | 0 |
| Case 87 | 1  | 82,154      | 4,004,250   | 3 | 0 | 3 | 1 |
| Case 87 | 1  | 4,005,693   | 48,961,903  | 4 | 0 | 4 | 1 |
| Case 87 | 1  | 48,965,209  | 57,042,954  | 3 | 0 | 3 | 1 |
| Case 87 | 1  | 57,049,977  | 57,249,558  | 2 | 0 | 2 | 1 |
| Case 87 | 1  | 57,252,494  | 62,905,542  | 3 | 0 | 3 | 1 |
| Case 87 | 1  | 62,905,893  | 64,056,411  | 2 | 0 | 2 | 1 |
| Case 87 | 1  | 64,059,266  | 92,339,976  | 3 | 0 | 3 | 1 |
| Case 87 | 1  | 92,358,371  | 94,441,950  | 2 | 0 | 2 | 1 |

|         |   |             |             |   |   |   |   |
|---------|---|-------------|-------------|---|---|---|---|
| Case 87 | 1 | 94,442,739  | 94,794,245  | 3 | 0 | 3 | 1 |
| Case 87 | 1 | 94,807,102  | 95,232,272  | 5 | 0 | 5 | 1 |
| Case 87 | 1 | 95,235,919  | 97,488,820  | 3 | 0 | 3 | 1 |
| Case 87 | 1 | 97,499,599  | 101,586,819 | 2 | 0 | 2 | 1 |
| Case 87 | 1 | 101,588,361 | 101,836,640 | 3 | 0 | 3 | 1 |
| Case 87 | 1 | 101,838,064 | 104,365,377 | 2 | 0 | 2 | 1 |
| Case 87 | 1 | 104,375,470 | 117,826,699 | 3 | 2 | 5 | 0 |
| Case 87 | 1 | 117,829,261 | 121,346,616 | 5 | 2 | 7 | 0 |
| Case 87 | 1 | 142,649,718 | 146,803,630 | 4 | 2 | 6 | 0 |
| Case 87 | 1 | 146,813,358 | 147,060,953 | 5 | 3 | 8 | 0 |
| Case 87 | 1 | 147,062,571 | 155,628,219 | 4 | 2 | 6 | 0 |
| Case 87 | 1 | 155,629,930 | 157,105,790 | 3 | 2 | 5 | 0 |
| Case 87 | 1 | 157,109,479 | 159,736,755 | 3 | 3 | 6 | 0 |
| Case 87 | 1 | 159,738,719 | 162,085,309 | 3 | 2 | 5 | 0 |
| Case 87 | 1 | 162,085,685 | 166,445,116 | 3 | 3 | 6 | 0 |
| Case 87 | 1 | 166,447,321 | 166,856,059 | 5 | 3 | 8 | 0 |
| Case 87 | 1 | 166,860,471 | 168,837,845 | 5 | 2 | 7 | 0 |
| Case 87 | 1 | 168,849,973 | 174,781,083 | 5 | 3 | 8 | 0 |
| Case 87 | 1 | 174,794,144 | 188,075,300 | 4 | 0 | 4 | 1 |
| Case 87 | 1 | 188,081,057 | 189,984,428 | 7 | 0 | 7 | 1 |
| Case 87 | 1 | 189,997,930 | 195,745,968 | 4 | 0 | 4 | 1 |
| Case 87 | 1 | 195,747,936 | 200,750,576 | 6 | 0 | 6 | 1 |
| Case 87 | 1 | 200,776,641 | 205,213,883 | 5 | 0 | 5 | 1 |
| Case 87 | 1 | 205,216,110 | 208,558,547 | 6 | 0 | 6 | 1 |
| Case 87 | 1 | 208,561,353 | 226,012,686 | 7 | 0 | 7 | 1 |
| Case 87 | 1 | 226,012,717 | 227,935,444 | 6 | 0 | 6 | 1 |
| Case 87 | 1 | 227,935,529 | 229,005,123 | 5 | 0 | 5 | 1 |
| Case 87 | 1 | 229,005,833 | 237,307,601 | 6 | 0 | 6 | 1 |
| Case 87 | 1 | 237,310,235 | 241,586,834 | 7 | 0 | 7 | 1 |
| Case 87 | 1 | 241,596,981 | 248,524,890 | 6 | 0 | 6 | 1 |
| Case 87 | 1 | 248,524,967 | 249,218,992 | 4 | 0 | 4 | 1 |
| Case 87 | 2 | 18,674      | 548,121     | 3 | 0 | 3 | 1 |
| Case 87 | 2 | 549,926     | 3,767,991   | 4 | 0 | 4 | 1 |
| Case 87 | 2 | 3,772,338   | 9,942,159   | 5 | 0 | 5 | 1 |
| Case 87 | 2 | 9,946,213   | 12,609,639  | 4 | 0 | 4 | 1 |
| Case 87 | 2 | 12,610,405  | 25,626,385  | 5 | 0 | 5 | 1 |
| Case 87 | 2 | 25,633,242  | 27,910,821  | 4 | 0 | 4 | 1 |
| Case 87 | 2 | 27,912,238  | 57,470,700  | 5 | 0 | 5 | 1 |
| Case 87 | 2 | 57,482,289  | 75,575,482  | 4 | 1 | 5 | 0 |
| Case 87 | 2 | 75,577,646  | 79,885,036  | 5 | 1 | 6 | 0 |
| Case 87 | 2 | 79,885,936  | 79,928,312  | 5 | 0 | 5 | 1 |
| Case 87 | 2 | 79,930,269  | 92,081,640  | 4 | 1 | 5 | 0 |
| Case 87 | 2 | 95,429,424  | 104,036,433 | 4 | 1 | 5 | 0 |
| Case 87 | 2 | 104,052,459 | 107,677,690 | 5 | 0 | 5 | 1 |
| Case 87 | 2 | 107,679,474 | 114,712,977 | 4 | 0 | 4 | 1 |
| Case 87 | 2 | 114,722,802 | 118,569,196 | 5 | 0 | 5 | 1 |
| Case 87 | 2 | 118,573,396 | 122,591,071 | 4 | 0 | 4 | 1 |
| Case 87 | 2 | 122,598,583 | 124,913,517 | 5 | 0 | 5 | 1 |
| Case 87 | 2 | 124,915,643 | 136,657,252 | 4 | 0 | 4 | 1 |
| Case 87 | 2 | 136,668,732 | 136,907,580 | 5 | 0 | 5 | 1 |
| Case 87 | 2 | 136,917,330 | 167,284,923 | 4 | 0 | 4 | 1 |
| Case 87 | 2 | 167,286,044 | 167,342,641 | 3 | 0 | 3 | 1 |
| Case 87 | 2 | 167,345,058 | 176,730,467 | 4 | 0 | 4 | 1 |
| Case 87 | 2 | 176,732,191 | 210,849,283 | 5 | 0 | 5 | 1 |
| Case 87 | 2 | 210,851,634 | 210,964,379 | 4 | 2 | 6 | 0 |
| Case 87 | 2 | 210,980,437 | 213,785,217 | 2 | 2 | 4 | 0 |
| Case 87 | 2 | 213,788,877 | 218,880,952 | 4 | 2 | 6 | 0 |
| Case 87 | 2 | 218,883,186 | 220,643,119 | 3 | 2 | 5 | 0 |
| Case 87 | 2 | 220,645,599 | 226,174,464 | 4 | 2 | 6 | 0 |
| Case 87 | 2 | 226,178,411 | 226,336,889 | 5 | 1 | 6 | 0 |
| Case 87 | 2 | 226,353,626 | 238,227,919 | 3 | 0 | 3 | 1 |



|         |   |             |             |    |   |    |   |
|---------|---|-------------|-------------|----|---|----|---|
| Case 87 | 2 | 238,231,803 | 243,048,760 | 2  | 0 | 2  | 1 |
| Case 87 | 3 | 61,495      | 42,299,870  | 4  | 0 | 4  | 1 |
| Case 87 | 3 | 42,303,311  | 50,085,153  | 3  | 0 | 3  | 1 |
| Case 87 | 3 | 50,085,708  | 50,393,640  | 4  | 0 | 4  | 1 |
| Case 87 | 3 | 50,395,827  | 55,263,106  | 3  | 0 | 3  | 1 |
| Case 87 | 3 | 55,263,442  | 60,288,428  | 4  | 0 | 4  | 1 |
| Case 87 | 3 | 60,289,842  | 60,576,324  | 0  | 0 | 0  | 0 |
| Case 87 | 3 | 60,576,769  | 81,349,843  | 4  | 0 | 4  | 1 |
| Case 87 | 3 | 81,356,647  | 81,586,077  | 5  | 0 | 5  | 1 |
| Case 87 | 3 | 81,586,439  | 90,442,925  | 4  | 0 | 4  | 1 |
| Case 87 | 3 | 93,537,290  | 99,034,849  | 4  | 0 | 4  | 1 |
| Case 87 | 3 | 99,037,859  | 100,148,679 | 5  | 0 | 5  | 1 |
| Case 87 | 3 | 100,149,154 | 103,345,439 | 4  | 0 | 4  | 1 |
| Case 87 | 3 | 103,348,699 | 106,836,240 | 5  | 0 | 5  | 1 |
| Case 87 | 3 | 106,841,915 | 124,979,404 | 4  | 0 | 4  | 1 |
| Case 87 | 3 | 124,979,785 | 130,103,784 | 3  | 0 | 3  | 1 |
| Case 87 | 3 | 130,104,062 | 140,177,177 | 4  | 0 | 4  | 1 |
| Case 87 | 3 | 140,178,381 | 143,405,698 | 3  | 0 | 3  | 1 |
| Case 87 | 3 | 143,409,272 | 143,422,775 | 2  | 0 | 2  | 1 |
| Case 87 | 3 | 143,427,040 | 148,631,606 | 3  | 0 | 3  | 1 |
| Case 87 | 3 | 148,633,264 | 197,838,262 | 4  | 0 | 4  | 1 |
| Case 87 | 4 | 71,566      | 13,193,295  | 2  | 2 | 4  | 0 |
| Case 87 | 4 | 13,201,728  | 15,738,370  | 7  | 1 | 8  | 0 |
| Case 87 | 4 | 15,738,795  | 16,304,314  | 6  | 1 | 7  | 0 |
| Case 87 | 4 | 16,305,979  | 22,414,873  | 4  | 2 | 6  | 0 |
| Case 87 | 4 | 22,416,738  | 31,525,698  | 5  | 2 | 7  | 0 |
| Case 87 | 4 | 31,531,497  | 32,174,131  | 2  | 0 | 2  | 1 |
| Case 87 | 4 | 32,186,096  | 32,745,997  | 3  | 2 | 5  | 0 |
| Case 87 | 4 | 32,749,519  | 33,910,151  | 6  | 2 | 8  | 0 |
| Case 87 | 4 | 33,944,748  | 35,673,557  | 3  | 2 | 5  | 0 |
| Case 87 | 4 | 35,676,909  | 36,583,469  | 5  | 2 | 7  | 0 |
| Case 87 | 4 | 36,597,275  | 40,396,560  | 2  | 2 | 4  | 0 |
| Case 87 | 4 | 40,396,697  | 40,488,449  | 4  | 2 | 6  | 0 |
| Case 87 | 4 | 40,490,465  | 42,256,594  | 3  | 2 | 5  | 0 |
| Case 87 | 4 | 42,265,464  | 42,457,561  | 10 | 2 | 12 | 0 |
| Case 87 | 4 | 42,466,641  | 42,816,051  | 12 | 2 | 14 | 0 |
| Case 87 | 4 | 42,817,301  | 42,933,496  | 9  | 3 | 12 | 0 |
| Case 87 | 4 | 42,937,881  | 43,440,641  | 12 | 3 | 15 | 0 |
| Case 87 | 4 | 43,442,648  | 43,561,857  | 20 | 5 | 25 | 0 |
| Case 87 | 4 | 43,564,831  | 43,665,919  | 12 | 3 | 15 | 0 |
| Case 87 | 4 | 43,666,123  | 43,739,772  | 17 | 3 | 20 | 0 |
| Case 87 | 4 | 43,751,098  | 44,908,179  | 13 | 3 | 16 | 0 |
| Case 87 | 4 | 44,909,241  | 45,263,659  | 12 | 4 | 16 | 0 |
| Case 87 | 4 | 45,285,463  | 45,441,814  | 13 | 6 | 19 | 0 |
| Case 87 | 4 | 45,448,030  | 45,800,337  | 13 | 4 | 17 | 0 |
| Case 87 | 4 | 45,811,691  | 45,859,948  | 6  | 2 | 8  | 0 |
| Case 87 | 4 | 45,863,268  | 47,359,371  | 5  | 2 | 7  | 0 |
| Case 87 | 4 | 47,365,544  | 47,508,540  | 12 | 3 | 15 | 0 |
| Case 87 | 4 | 47,511,781  | 48,462,164  | 10 | 2 | 12 | 0 |
| Case 87 | 4 | 48,462,902  | 48,490,939  | 8  | 3 | 11 | 0 |
| Case 87 | 4 | 48,491,010  | 48,952,209  | 12 | 2 | 14 | 0 |
| Case 87 | 4 | 48,960,863  | 49,620,898  | 11 | 0 | 11 | 1 |
| Case 87 | 4 | 52,697,856  | 59,180,928  | 11 | 0 | 11 | 1 |
| Case 87 | 4 | 59,211,129  | 59,378,549  | 0  | 0 | 0  | 0 |
| Case 87 | 4 | 59,388,759  | 68,436,883  | 2  | 0 | 2  | 1 |
| Case 87 | 4 | 68,441,091  | 69,283,448  | 3  | 2 | 5  | 0 |
| Case 87 | 4 | 69,337,325  | 71,117,202  | 2  | 0 | 2  | 1 |
| Case 87 | 4 | 71,121,681  | 71,958,094  | 3  | 0 | 3  | 1 |
| Case 87 | 4 | 71,975,779  | 74,657,255  | 3  | 2 | 5  | 0 |
| Case 87 | 4 | 74,667,727  | 75,096,401  | 5  | 2 | 7  | 0 |
| Case 87 | 4 | 75,102,993  | 75,851,372  | 3  | 0 | 3  | 1 |

|         |   |             |             |   |   |   |   |
|---------|---|-------------|-------------|---|---|---|---|
| Case 87 | 4 | 75,857,836  | 76,809,385  | 5 | 2 | 7 | 0 |
| Case 87 | 4 | 76,809,396  | 85,007,150  | 3 | 0 | 3 | 1 |
| Case 87 | 4 | 85,024,046  | 87,062,363  | 5 | 2 | 7 | 0 |
| Case 87 | 4 | 87,074,032  | 90,600,620  | 3 | 0 | 3 | 1 |
| Case 87 | 4 | 90,602,795  | 107,470,497 | 2 | 0 | 2 | 1 |
| Case 87 | 4 | 107,471,140 | 129,315,804 | 3 | 0 | 3 | 1 |
| Case 87 | 4 | 129,336,928 | 132,024,484 | 4 | 0 | 4 | 1 |
| Case 87 | 4 | 132,031,397 | 132,282,009 | 3 | 2 | 5 | 0 |
| Case 87 | 4 | 132,288,496 | 133,287,497 | 2 | 2 | 4 | 0 |
| Case 87 | 4 | 133,289,007 | 161,795,832 | 3 | 2 | 5 | 0 |
| Case 87 | 4 | 161,799,400 | 161,946,368 | 3 | 1 | 4 | 0 |
| Case 87 | 4 | 161,952,228 | 173,409,234 | 3 | 2 | 5 | 0 |
| Case 87 | 4 | 173,418,304 | 183,655,750 | 2 | 1 | 3 | 0 |
| Case 87 | 4 | 183,658,159 | 183,694,642 | 4 | 1 | 5 | 0 |
| Case 87 | 4 | 183,696,245 | 183,935,289 | 2 | 1 | 3 | 0 |
| Case 87 | 4 | 183,942,308 | 184,902,533 | 1 | 0 | 1 | 0 |
| Case 87 | 4 | 184,905,482 | 185,461,350 | 2 | 0 | 2 | 1 |
| Case 87 | 4 | 185,462,993 | 186,468,992 | 2 | 1 | 3 | 0 |
| Case 87 | 4 | 186,469,493 | 190,963,766 | 2 | 0 | 2 | 1 |
| Case 87 | 5 | 38,139      | 1,685,655   | 2 | 2 | 4 | 0 |
| Case 87 | 5 | 1,686,233   | 12,566,885  | 3 | 2 | 5 | 0 |
| Case 87 | 5 | 12,572,670  | 13,545,172  | 7 | 2 | 9 | 0 |
| Case 87 | 5 | 13,572,053  | 16,834,274  | 4 | 2 | 6 | 0 |
| Case 87 | 5 | 16,834,568  | 17,409,998  | 3 | 0 | 3 | 1 |
| Case 87 | 5 | 17,415,197  | 30,746,632  | 2 | 0 | 2 | 1 |
| Case 87 | 5 | 30,749,170  | 34,166,261  | 3 | 0 | 3 | 1 |
| Case 87 | 5 | 34,180,455  | 37,185,061  | 4 | 2 | 6 | 0 |
| Case 87 | 5 | 37,193,343  | 38,946,608  | 5 | 2 | 7 | 0 |
| Case 87 | 5 | 38,950,028  | 42,019,110  | 2 | 2 | 4 | 0 |
| Case 87 | 5 | 42,038,122  | 46,399,093  | 2 | 0 | 2 | 1 |
| Case 87 | 5 | 49,457,282  | 49,564,798  | 2 | 0 | 2 | 1 |
| Case 87 | 5 | 49,586,870  | 58,355,458  | 4 | 0 | 4 | 1 |
| Case 87 | 5 | 58,357,931  | 60,238,590  | 3 | 0 | 3 | 1 |
| Case 87 | 5 | 60,241,826  | 61,967,808  | 4 | 0 | 4 | 1 |
| Case 87 | 5 | 61,977,629  | 62,094,034  | 6 | 0 | 6 | 1 |
| Case 87 | 5 | 62,094,462  | 65,758,859  | 4 | 0 | 4 | 1 |
| Case 87 | 5 | 65,759,249  | 80,898,725  | 3 | 0 | 3 | 1 |
| Case 87 | 5 | 80,900,598  | 95,089,373  | 1 | 0 | 1 | 0 |
| Case 87 | 5 | 95,091,201  | 96,155,608  | 2 | 0 | 2 | 1 |
| Case 87 | 5 | 96,156,494  | 131,296,236 | 1 | 0 | 1 | 0 |
| Case 87 | 5 | 131,302,110 | 134,406,317 | 2 | 0 | 2 | 1 |
| Case 87 | 5 | 134,431,163 | 180,693,127 | 4 | 0 | 4 | 1 |
| Case 87 | 6 | 108,666     | 8,516,062   | 3 | 2 | 5 | 0 |
| Case 87 | 6 | 8,528,235   | 14,756,166  | 4 | 2 | 6 | 0 |
| Case 87 | 6 | 14,756,493  | 22,665,236  | 3 | 2 | 5 | 0 |
| Case 87 | 6 | 22,665,497  | 28,173,219  | 4 | 2 | 6 | 0 |
| Case 87 | 6 | 28,176,415  | 28,184,371  | 6 | 3 | 9 | 0 |
| Case 87 | 6 | 28,185,726  | 29,772,395  | 4 | 2 | 6 | 0 |
| Case 87 | 6 | 29,772,549  | 32,184,345  | 3 | 2 | 5 | 0 |
| Case 87 | 6 | 32,184,705  | 33,059,796  | 4 | 2 | 6 | 0 |
| Case 87 | 6 | 33,059,996  | 35,782,386  | 3 | 2 | 5 | 0 |
| Case 87 | 6 | 35,782,525  | 41,029,085  | 4 | 2 | 6 | 0 |
| Case 87 | 6 | 41,029,219  | 44,525,989  | 3 | 2 | 5 | 0 |
| Case 87 | 6 | 44,526,440  | 58,752,089  | 4 | 2 | 6 | 0 |
| Case 87 | 6 | 61,891,118  | 63,228,933  | 4 | 2 | 6 | 0 |
| Case 87 | 6 | 63,231,367  | 63,806,114  | 5 | 2 | 7 | 0 |
| Case 87 | 6 | 63,811,569  | 82,379,575  | 4 | 2 | 6 | 0 |
| Case 87 | 6 | 82,394,320  | 82,904,341  | 6 | 2 | 8 | 0 |
| Case 87 | 6 | 82,904,346  | 107,162,032 | 4 | 2 | 6 | 0 |
| Case 87 | 6 | 107,162,154 | 107,237,052 | 3 | 2 | 5 | 0 |
| Case 87 | 6 | 107,237,748 | 117,890,791 | 4 | 2 | 6 | 0 |

|         |   |             |             |    |   |    |   |
|---------|---|-------------|-------------|----|---|----|---|
| Case 87 | 6 | 117,892,023 | 170,980,171 | 2  | 2 | 4  | 0 |
| Case 87 | 7 | 44,935      | 2,313,607   | 5  | 0 | 5  | 1 |
| Case 87 | 7 | 2,315,056   | 3,102,237   | 6  | 0 | 6  | 1 |
| Case 87 | 7 | 3,107,183   | 3,723,982   | 7  | 0 | 7  | 1 |
| Case 87 | 7 | 3,724,499   | 7,054,045   | 6  | 0 | 6  | 1 |
| Case 87 | 7 | 7,054,164   | 8,937,076   | 7  | 0 | 7  | 1 |
| Case 87 | 7 | 8,938,582   | 8,956,393   | 9  | 0 | 9  | 1 |
| Case 87 | 7 | 8,957,041   | 21,431,809  | 8  | 0 | 8  | 1 |
| Case 87 | 7 | 21,433,440  | 41,989,780  | 7  | 0 | 7  | 1 |
| Case 87 | 7 | 41,993,594  | 42,108,145  | 1  | 0 | 1  | 0 |
| Case 87 | 7 | 42,112,533  | 43,789,148  | 7  | 0 | 7  | 1 |
| Case 87 | 7 | 43,797,453  | 46,049,342  | 6  | 0 | 6  | 1 |
| Case 87 | 7 | 46,049,467  | 47,272,813  | 7  | 0 | 7  | 1 |
| Case 87 | 7 | 47,274,398  | 51,774,799  | 6  | 0 | 6  | 1 |
| Case 87 | 7 | 51,779,695  | 53,345,258  | 7  | 0 | 7  | 1 |
| Case 87 | 7 | 53,349,479  | 54,219,207  | 7  | 1 | 8  | 0 |
| Case 87 | 7 | 54,219,462  | 58,019,061  | 6  | 1 | 7  | 0 |
| Case 87 | 7 | 61,056,053  | 62,047,108  | 6  | 1 | 7  | 0 |
| Case 87 | 7 | 62,074,781  | 62,698,954  | 11 | 2 | 13 | 0 |
| Case 87 | 7 | 62,699,114  | 66,452,054  | 7  | 2 | 9  | 0 |
| Case 87 | 7 | 66,453,413  | 66,768,879  | 5  | 1 | 6  | 0 |
| Case 87 | 7 | 66,773,745  | 67,885,035  | 3  | 0 | 3  | 1 |
| Case 87 | 7 | 67,887,396  | 86,482,688  | 3  | 1 | 4  | 0 |
| Case 87 | 7 | 86,502,733  | 97,281,981  | 3  | 3 | 6  | 0 |
| Case 87 | 7 | 97,283,118  | 99,757,963  | 3  | 2 | 5  | 0 |
| Case 87 | 7 | 99,757,982  | 102,724,164 | 2  | 2 | 4  | 0 |
| Case 87 | 7 | 102,725,941 | 137,170,734 | 3  | 2 | 5  | 0 |
| Case 87 | 7 | 137,172,379 | 149,548,591 | 2  | 2 | 4  | 0 |
| Case 87 | 7 | 149,551,993 | 149,925,431 | 3  | 2 | 5  | 0 |
| Case 87 | 7 | 149,934,267 | 153,462,806 | 2  | 2 | 4  | 0 |
| Case 87 | 7 | 153,478,281 | 153,696,268 | 5  | 2 | 7  | 0 |
| Case 87 | 7 | 153,697,418 | 159,119,486 | 2  | 2 | 4  | 0 |
| Case 87 | 8 | 164,984     | 8,984,302   | 3  | 0 | 3  | 1 |
| Case 87 | 8 | 8,986,613   | 9,112,572   | 1  | 0 | 1  | 0 |
| Case 87 | 8 | 9,121,398   | 38,840,300  | 3  | 0 | 3  | 1 |
| Case 87 | 8 | 38,840,591  | 40,146,549  | 2  | 0 | 2  | 1 |
| Case 87 | 8 | 40,152,297  | 40,452,558  | 3  | 0 | 3  | 1 |
| Case 87 | 8 | 40,456,201  | 40,541,533  | 2  | 0 | 2  | 1 |
| Case 87 | 8 | 40,542,986  | 42,413,943  | 3  | 0 | 3  | 1 |
| Case 87 | 8 | 42,414,226  | 42,507,740  | 2  | 0 | 2  | 1 |
| Case 87 | 8 | 42,509,597  | 42,618,713  | 3  | 0 | 3  | 1 |
| Case 87 | 8 | 42,620,264  | 43,447,235  | 2  | 0 | 2  | 1 |
| Case 87 | 8 | 43,473,748  | 43,791,691  | 1  | 0 | 1  | 0 |
| Case 87 | 8 | 46,886,735  | 46,965,788  | 1  | 0 | 1  | 0 |
| Case 87 | 8 | 46,982,831  | 49,039,681  | 2  | 0 | 2  | 1 |
| Case 87 | 8 | 49,046,707  | 60,345,744  | 3  | 2 | 5  | 0 |
| Case 87 | 8 | 60,346,384  | 61,396,829  | 3  | 1 | 4  | 0 |
| Case 87 | 8 | 61,418,431  | 61,911,070  | 2  | 1 | 3  | 0 |
| Case 87 | 8 | 61,920,845  | 77,929,911  | 3  | 1 | 4  | 0 |
| Case 87 | 8 | 77,931,941  | 86,171,664  | 3  | 2 | 5  | 0 |
| Case 87 | 8 | 86,171,710  | 87,671,396  | 5  | 2 | 7  | 0 |
| Case 87 | 8 | 87,673,633  | 90,300,401  | 4  | 2 | 6  | 0 |
| Case 87 | 8 | 90,307,568  | 90,534,068  | 2  | 0 | 2  | 1 |
| Case 87 | 8 | 90,539,951  | 92,730,829  | 4  | 2 | 6  | 0 |
| Case 87 | 8 | 92,736,906  | 93,592,320  | 5  | 2 | 7  | 0 |
| Case 87 | 8 | 93,593,396  | 142,106,228 | 2  | 2 | 4  | 0 |
| Case 87 | 8 | 142,108,239 | 146,293,414 | 2  | 1 | 3  | 0 |
| Case 87 | 9 | 46,587      | 3,880,627   | 3  | 0 | 3  | 1 |
| Case 87 | 9 | 3,880,643   | 3,967,645   | 1  | 0 | 1  | 0 |
| Case 87 | 9 | 3,967,758   | 9,042,840   | 3  | 0 | 3  | 1 |
| Case 87 | 9 | 9,043,421   | 12,839,484  | 2  | 0 | 2  | 1 |

|         |    |             |             |   |   |   |   |
|---------|----|-------------|-------------|---|---|---|---|
| Case 87 | 9  | 12,842,241  | 22,532,249  | 3 | 0 | 3 | 1 |
| Case 87 | 9  | 22,535,511  | 32,331,414  | 2 | 0 | 2 | 1 |
| Case 87 | 9  | 32,332,855  | 38,751,317  | 3 | 0 | 3 | 1 |
| Case 87 | 9  | 38,752,068  | 46,944,322  | 3 | 1 | 4 | 0 |
| Case 87 | 9  | 65,629,772  | 77,159,265  | 2 | 2 | 4 | 0 |
| Case 87 | 9  | 77,159,715  | 77,662,999  | 2 | 0 | 2 | 1 |
| Case 87 | 9  | 77,670,081  | 88,164,213  | 3 | 0 | 3 | 1 |
| Case 87 | 9  | 88,167,035  | 88,790,268  | 2 | 0 | 2 | 1 |
| Case 87 | 9  | 88,794,032  | 89,404,665  | 3 | 2 | 5 | 0 |
| Case 87 | 9  | 89,408,927  | 89,985,014  | 2 | 1 | 3 | 0 |
| Case 87 | 9  | 89,985,250  | 116,958,646 | 2 | 2 | 4 | 0 |
| Case 87 | 9  | 116,961,156 | 117,853,237 | 3 | 2 | 5 | 0 |
| Case 87 | 9  | 117,856,114 | 121,430,880 | 4 | 2 | 6 | 0 |
| Case 87 | 9  | 121,442,207 | 132,163,254 | 2 | 2 | 4 | 0 |
| Case 87 | 9  | 132,167,567 | 132,436,381 | 3 | 2 | 5 | 0 |
| Case 87 | 9  | 132,444,099 | 136,722,358 | 2 | 2 | 4 | 0 |
| Case 87 | 9  | 136,723,520 | 137,642,654 | 3 | 2 | 5 | 0 |
| Case 87 | 9  | 137,642,705 | 139,019,445 | 2 | 2 | 4 | 0 |
| Case 87 | 9  | 139,020,613 | 140,760,661 | 2 | 1 | 3 | 0 |
| Case 87 | 9  | 140,761,465 | 141,066,491 | 2 | 2 | 4 | 0 |
| Case 87 | 10 | 98,087      | 32,128,023  | 2 | 0 | 2 | 1 |
| Case 87 | 10 | 32,128,246  | 33,534,880  | 4 | 2 | 6 | 0 |
| Case 87 | 10 | 33,535,907  | 35,032,558  | 2 | 2 | 4 | 0 |
| Case 87 | 10 | 35,053,262  | 39,097,912  | 3 | 2 | 5 | 0 |
| Case 87 | 10 | 42,436,301  | 42,509,794  | 3 | 2 | 5 | 0 |
| Case 87 | 10 | 42,682,133  | 72,671,684  | 2 | 2 | 4 | 0 |
| Case 87 | 10 | 72,673,607  | 72,788,676  | 2 | 0 | 2 | 1 |
| Case 87 | 10 | 72,792,488  | 74,843,338  | 4 | 0 | 4 | 1 |
| Case 87 | 10 | 74,874,187  | 76,498,150  | 4 | 1 | 5 | 0 |
| Case 87 | 10 | 76,498,953  | 80,919,442  | 2 | 1 | 3 | 0 |
| Case 87 | 10 | 80,920,370  | 80,996,513  | 2 | 0 | 2 | 1 |
| Case 87 | 10 | 80,999,869  | 94,779,550  | 2 | 1 | 3 | 0 |
| Case 87 | 10 | 94,781,857  | 133,745,628 | 4 | 1 | 5 | 0 |
| Case 87 | 10 | 133,748,056 | 135,088,741 | 3 | 1 | 4 | 0 |
| Case 87 | 10 | 135,089,017 | 135,477,883 | 2 | 2 | 4 | 0 |
| Case 87 | 11 | 193,146     | 2,095,799   | 2 | 1 | 3 | 0 |
| Case 87 | 11 | 2,095,968   | 8,370,644   | 2 | 2 | 4 | 0 |
| Case 87 | 11 | 8,374,548   | 8,710,511   | 2 | 0 | 2 | 1 |
| Case 87 | 11 | 8,714,325   | 9,408,426   | 3 | 0 | 3 | 1 |
| Case 87 | 11 | 9,416,258   | 9,546,800   | 2 | 0 | 2 | 1 |
| Case 87 | 11 | 9,550,673   | 9,910,728   | 3 | 0 | 3 | 1 |
| Case 87 | 11 | 9,912,052   | 10,186,289  | 2 | 0 | 2 | 1 |
| Case 87 | 11 | 10,211,233  | 50,467,961  | 2 | 2 | 4 | 0 |
| Case 87 | 11 | 50,468,978  | 51,591,253  | 2 | 1 | 3 | 0 |
| Case 87 | 11 | 54,794,237  | 55,415,016  | 2 | 1 | 3 | 0 |
| Case 87 | 11 | 55,424,207  | 86,140,441  | 2 | 2 | 4 | 0 |
| Case 87 | 11 | 86,145,296  | 86,266,683  | 2 | 1 | 3 | 0 |
| Case 87 | 11 | 86,267,175  | 96,127,385  | 2 | 2 | 4 | 0 |
| Case 87 | 11 | 96,131,460  | 96,236,914  | 2 | 1 | 3 | 0 |
| Case 87 | 11 | 96,241,301  | 100,291,752 | 2 | 2 | 4 | 0 |
| Case 87 | 11 | 100,308,021 | 100,830,693 | 4 | 2 | 6 | 0 |
| Case 87 | 11 | 100,837,804 | 109,357,059 | 2 | 2 | 4 | 0 |
| Case 87 | 11 | 109,382,921 | 110,147,873 | 4 | 2 | 6 | 0 |
| Case 87 | 11 | 110,156,596 | 110,270,703 | 2 | 0 | 2 | 1 |
| Case 87 | 11 | 110,287,537 | 128,856,563 | 3 | 0 | 3 | 1 |
| Case 87 | 11 | 128,857,025 | 129,150,067 | 2 | 0 | 2 | 1 |
| Case 87 | 11 | 129,161,105 | 133,939,021 | 3 | 0 | 3 | 1 |
| Case 87 | 11 | 133,941,046 | 134,934,063 | 2 | 0 | 2 | 1 |
| Case 87 | 12 | 191,619     | 34,853,011  | 2 | 2 | 4 | 0 |
| Case 87 | 12 | 37,876,400  | 125,030,939 | 2 | 2 | 4 | 0 |
| Case 87 | 12 | 125,032,789 | 125,125,778 | 3 | 2 | 5 | 0 |

|         |    |             |             |    |   |    |   |
|---------|----|-------------|-------------|----|---|----|---|
| Case 87 | 12 | 125,125,932 | 125,238,811 | 4  | 2 | 6  | 0 |
| Case 87 | 12 | 125,240,557 | 125,265,636 | 3  | 2 | 5  | 0 |
| Case 87 | 12 | 125,269,323 | 132,163,328 | 2  | 2 | 4  | 0 |
| Case 87 | 12 | 132,168,129 | 133,810,935 | 2  | 1 | 3  | 0 |
| Case 87 | 13 | 19,058,717  | 19,943,770  | 4  | 3 | 7  | 0 |
| Case 87 | 13 | 19,945,191  | 22,397,453  | 3  | 3 | 6  | 0 |
| Case 87 | 13 | 22,408,920  | 26,680,704  | 3  | 2 | 5  | 0 |
| Case 87 | 13 | 26,686,438  | 32,844,834  | 3  | 1 | 4  | 0 |
| Case 87 | 13 | 32,845,230  | 32,876,514  | 6  | 2 | 8  | 0 |
| Case 87 | 13 | 32,877,321  | 36,535,192  | 3  | 1 | 4  | 0 |
| Case 87 | 13 | 36,537,530  | 37,748,064  | 7  | 2 | 9  | 0 |
| Case 87 | 13 | 37,763,182  | 40,229,585  | 8  | 2 | 10 | 0 |
| Case 87 | 13 | 40,229,891  | 40,253,741  | 14 | 3 | 17 | 0 |
| Case 87 | 13 | 40,257,949  | 40,795,656  | 10 | 2 | 12 | 0 |
| Case 87 | 13 | 40,797,756  | 40,982,876  | 8  | 2 | 10 | 0 |
| Case 87 | 13 | 40,984,601  | 42,874,615  | 10 | 2 | 12 | 0 |
| Case 87 | 13 | 42,874,690  | 43,351,947  | 7  | 2 | 9  | 0 |
| Case 87 | 13 | 43,353,044  | 44,685,946  | 3  | 1 | 4  | 0 |
| Case 87 | 13 | 44,689,605  | 45,030,799  | 5  | 1 | 6  | 0 |
| Case 87 | 13 | 45,037,165  | 48,986,450  | 3  | 1 | 4  | 0 |
| Case 87 | 13 | 48,987,032  | 49,232,391  | 6  | 2 | 8  | 0 |
| Case 87 | 13 | 49,238,912  | 58,257,265  | 3  | 1 | 4  | 0 |
| Case 87 | 13 | 58,266,222  | 59,645,513  | 1  | 0 | 1  | 0 |
| Case 87 | 13 | 59,663,358  | 59,713,597  | 2  | 0 | 2  | 1 |
| Case 87 | 13 | 59,713,776  | 65,178,318  | 3  | 1 | 4  | 0 |
| Case 87 | 13 | 65,182,365  | 69,127,905  | 2  | 1 | 3  | 0 |
| Case 87 | 13 | 69,129,159  | 108,564,358 | 3  | 1 | 4  | 0 |
| Case 87 | 13 | 108,564,597 | 109,248,034 | 4  | 0 | 4  | 1 |
| Case 87 | 13 | 109,250,314 | 115,103,529 | 3  | 2 | 5  | 0 |
| Case 87 | 14 | 19,280,733  | 20,416,499  | 4  | 2 | 6  | 0 |
| Case 87 | 14 | 20,420,338  | 22,169,400  | 3  | 3 | 6  | 0 |
| Case 87 | 14 | 22,179,595  | 22,942,619  | 4  | 3 | 7  | 0 |
| Case 87 | 14 | 22,942,890  | 25,273,163  | 3  | 2 | 5  | 0 |
| Case 87 | 14 | 25,273,366  | 28,629,231  | 3  | 3 | 6  | 0 |
| Case 87 | 14 | 28,656,044  | 99,075,053  | 3  | 2 | 5  | 0 |
| Case 87 | 14 | 99,075,777  | 104,843,394 | 3  | 1 | 4  | 0 |
| Case 87 | 14 | 104,849,219 | 107,287,663 | 2  | 1 | 3  | 0 |
| Case 87 | 15 | 20,034,919  | 36,728,799  | 2  | 2 | 4  | 0 |
| Case 87 | 15 | 36,730,953  | 39,172,185  | 3  | 2 | 5  | 0 |
| Case 87 | 15 | 39,176,075  | 61,348,204  | 2  | 2 | 4  | 0 |
| Case 87 | 15 | 61,349,920  | 61,369,371  | 3  | 3 | 6  | 0 |
| Case 87 | 15 | 61,369,747  | 69,778,982  | 2  | 2 | 4  | 0 |
| Case 87 | 15 | 69,781,764  | 70,595,576  | 5  | 2 | 7  | 0 |
| Case 87 | 15 | 70,599,743  | 70,646,062  | 7  | 2 | 9  | 0 |
| Case 87 | 15 | 70,666,282  | 74,147,244  | 5  | 2 | 7  | 0 |
| Case 87 | 15 | 74,156,086  | 76,023,721  | 4  | 1 | 5  | 0 |
| Case 87 | 15 | 76,026,807  | 102,461,162 | 5  | 2 | 7  | 0 |
| Case 87 | 16 | 88,165      | 1,703,067   | 4  | 0 | 4  | 1 |
| Case 87 | 16 | 1,705,081   | 1,867,236   | 1  | 0 | 1  | 0 |
| Case 87 | 16 | 1,869,124   | 5,145,230   | 4  | 0 | 4  | 1 |
| Case 87 | 16 | 5,161,499   | 7,975,357   | 5  | 0 | 5  | 1 |
| Case 87 | 16 | 7,979,669   | 8,564,994   | 3  | 0 | 3  | 1 |
| Case 87 | 16 | 8,565,722   | 27,004,778  | 5  | 0 | 5  | 1 |
| Case 87 | 16 | 27,005,061  | 35,285,582  | 4  | 0 | 4  | 1 |
| Case 87 | 16 | 46,450,037  | 51,258,826  | 5  | 0 | 5  | 1 |
| Case 87 | 16 | 51,259,725  | 55,379,204  | 6  | 0 | 6  | 1 |
| Case 87 | 16 | 55,381,171  | 58,464,075  | 5  | 0 | 5  | 1 |
| Case 87 | 16 | 58,468,211  | 59,310,742  | 7  | 0 | 7  | 1 |
| Case 87 | 16 | 59,310,833  | 66,483,806  | 6  | 0 | 6  | 1 |
| Case 87 | 16 | 66,486,925  | 68,749,663  | 5  | 0 | 5  | 1 |
| Case 87 | 16 | 68,750,190  | 80,910,538  | 6  | 0 | 6  | 1 |

|         |    |            |            |    |   |    |   |
|---------|----|------------|------------|----|---|----|---|
| Case 87 | 16 | 80,913,669 | 82,106,299 | 5  | 0 | 5  | 1 |
| Case 87 | 16 | 82,113,471 | 84,035,430 | 6  | 0 | 6  | 1 |
| Case 87 | 16 | 84,035,446 | 88,465,301 | 5  | 0 | 5  | 1 |
| Case 87 | 16 | 88,465,992 | 90,274,695 | 4  | 0 | 4  | 1 |
| Case 87 | 17 | 11,885     | 1,675,174  | 5  | 0 | 5  | 1 |
| Case 87 | 17 | 1,675,252  | 14,362,276 | 4  | 0 | 4  | 1 |
| Case 87 | 17 | 14,363,666 | 15,878,256 | 5  | 0 | 5  | 1 |
| Case 87 | 17 | 15,878,534 | 19,313,997 | 4  | 0 | 4  | 1 |
| Case 87 | 17 | 19,314,611 | 21,707,060 | 5  | 0 | 5  | 1 |
| Case 87 | 17 | 21,717,727 | 22,242,355 | 7  | 0 | 7  | 1 |
| Case 87 | 17 | 25,268,142 | 26,643,989 | 7  | 0 | 7  | 1 |
| Case 87 | 17 | 26,644,668 | 27,969,220 | 6  | 0 | 6  | 1 |
| Case 87 | 17 | 27,998,978 | 36,498,982 | 4  | 0 | 4  | 1 |
| Case 87 | 17 | 36,499,019 | 37,047,156 | 5  | 0 | 5  | 1 |
| Case 87 | 17 | 37,047,658 | 37,801,415 | 4  | 0 | 4  | 1 |
| Case 87 | 17 | 37,804,858 | 41,176,831 | 5  | 0 | 5  | 1 |
| Case 87 | 17 | 41,179,267 | 49,514,867 | 4  | 0 | 4  | 1 |
| Case 87 | 17 | 49,515,133 | 49,533,812 | 5  | 1 | 6  | 0 |
| Case 87 | 17 | 49,540,270 | 53,904,104 | 5  | 0 | 5  | 1 |
| Case 87 | 17 | 53,904,453 | 70,642,790 | 4  | 0 | 4  | 1 |
| Case 87 | 17 | 70,642,857 | 79,587,635 | 3  | 0 | 3  | 1 |
| Case 87 | 17 | 79,596,811 | 79,612,633 | 2  | 0 | 2  | 1 |
| Case 87 | 17 | 79,614,154 | 81,060,040 | 3  | 0 | 3  | 1 |
| Case 87 | 18 | 87,505     | 3,968,414  | 7  | 0 | 7  | 1 |
| Case 87 | 18 | 3,970,124  | 4,304,557  | 8  | 0 | 8  | 1 |
| Case 87 | 18 | 4,305,905  | 15,330,525 | 7  | 0 | 7  | 1 |
| Case 87 | 18 | 15,375,878 | 15,375,878 | 7  | 1 | 8  | 0 |
| Case 87 | 18 | 18,520,354 | 20,573,157 | 7  | 1 | 8  | 0 |
| Case 87 | 18 | 20,573,213 | 22,272,798 | 6  | 1 | 7  | 0 |
| Case 87 | 18 | 22,274,400 | 24,051,229 | 7  | 2 | 9  | 0 |
| Case 87 | 18 | 24,055,407 | 24,722,932 | 9  | 1 | 10 | 0 |
| Case 87 | 18 | 24,727,747 | 24,744,646 | 12 | 2 | 14 | 0 |
| Case 87 | 18 | 24,745,889 | 25,106,111 | 9  | 1 | 10 | 0 |
| Case 87 | 18 | 25,125,958 | 25,437,752 | 8  | 0 | 8  | 1 |
| Case 87 | 18 | 25,440,258 | 27,572,034 | 5  | 0 | 5  | 1 |
| Case 87 | 18 | 27,580,903 | 27,869,383 | 2  | 0 | 2  | 1 |
| Case 87 | 18 | 27,873,601 | 34,140,651 | 4  | 0 | 4  | 1 |
| Case 87 | 18 | 34,141,546 | 37,194,499 | 5  | 0 | 5  | 1 |
| Case 87 | 18 | 37,200,183 | 39,132,894 | 1  | 0 | 1  | 0 |
| Case 87 | 18 | 39,135,598 | 41,168,311 | 3  | 0 | 3  | 1 |
| Case 87 | 18 | 41,168,491 | 42,055,478 | 0  | 0 | 0  | 0 |
| Case 87 | 18 | 42,077,844 | 63,104,519 | 3  | 0 | 3  | 1 |
| Case 87 | 18 | 63,107,169 | 73,863,714 | 5  | 0 | 5  | 1 |
| Case 87 | 18 | 73,864,476 | 74,568,937 | 4  | 0 | 4  | 1 |
| Case 87 | 18 | 74,580,780 | 76,693,565 | 3  | 0 | 3  | 1 |
| Case 87 | 18 | 76,700,509 | 78,015,180 | 2  | 0 | 2  | 1 |
| Case 87 | 19 | 260,912    | 1,673,793  | 3  | 0 | 3  | 1 |
| Case 87 | 19 | 1,682,776  | 9,146,472  | 4  | 0 | 4  | 1 |
| Case 87 | 19 | 9,150,838  | 9,196,725  | 5  | 0 | 5  | 1 |
| Case 87 | 19 | 9,199,226  | 11,881,451 | 4  | 0 | 4  | 1 |
| Case 87 | 19 | 11,885,777 | 11,943,697 | 3  | 0 | 3  | 1 |
| Case 87 | 19 | 11,943,762 | 11,995,508 | 4  | 0 | 4  | 1 |
| Case 87 | 19 | 12,014,274 | 12,639,911 | 3  | 0 | 3  | 1 |
| Case 87 | 19 | 12,641,232 | 24,629,285 | 4  | 0 | 4  | 1 |
| Case 87 | 19 | 27,732,159 | 32,779,619 | 4  | 0 | 4  | 1 |
| Case 87 | 19 | 32,783,217 | 35,608,148 | 3  | 3 | 6  | 0 |
| Case 87 | 19 | 35,608,868 | 36,831,950 | 3  | 2 | 5  | 0 |
| Case 87 | 19 | 36,832,427 | 38,525,798 | 3  | 3 | 6  | 0 |
| Case 87 | 19 | 38,539,988 | 41,310,609 | 3  | 2 | 5  | 0 |
| Case 87 | 19 | 41,314,720 | 43,432,597 | 4  | 0 | 4  | 1 |
| Case 87 | 19 | 43,433,687 | 45,202,027 | 4  | 1 | 5  | 0 |

|         |    |             |             |   |   |    |   |
|---------|----|-------------|-------------|---|---|----|---|
| Case 87 | 19 | 45,205,877  | 46,646,841  | 3 | 1 | 4  | 0 |
| Case 87 | 19 | 46,646,936  | 46,894,786  | 4 | 1 | 5  | 0 |
| Case 87 | 19 | 46,895,747  | 48,508,006  | 3 | 2 | 5  | 0 |
| Case 87 | 19 | 48,508,641  | 49,055,796  | 4 | 1 | 5  | 0 |
| Case 87 | 19 | 49,061,724  | 50,666,351  | 3 | 1 | 4  | 0 |
| Case 87 | 19 | 50,672,518  | 55,225,076  | 3 | 2 | 5  | 0 |
| Case 87 | 19 | 55,225,613  | 56,424,008  | 2 | 2 | 4  | 0 |
| Case 87 | 19 | 56,424,219  | 59,097,160  | 3 | 2 | 5  | 0 |
| Case 87 | 20 | 63,244      | 2,262,636   | 3 | 2 | 5  | 0 |
| Case 87 | 20 | 2,268,943   | 2,418,352   | 2 | 1 | 3  | 0 |
| Case 87 | 20 | 2,421,742   | 5,718,030   | 3 | 2 | 5  | 0 |
| Case 87 | 20 | 5,727,600   | 18,297,193  | 2 | 2 | 4  | 0 |
| Case 87 | 20 | 18,297,324  | 20,660,549  | 2 | 1 | 3  | 0 |
| Case 87 | 20 | 20,664,761  | 21,321,450  | 3 | 1 | 4  | 0 |
| Case 87 | 20 | 21,327,089  | 26,293,985  | 3 | 2 | 5  | 0 |
| Case 87 | 20 | 29,425,357  | 40,849,546  | 3 | 2 | 5  | 0 |
| Case 87 | 20 | 40,859,050  | 41,153,263  | 5 | 2 | 7  | 0 |
| Case 87 | 20 | 41,160,601  | 41,378,103  | 4 | 3 | 7  | 0 |
| Case 87 | 20 | 41,381,215  | 43,613,825  | 4 | 2 | 6  | 0 |
| Case 87 | 20 | 43,625,927  | 44,354,387  | 3 | 2 | 5  | 0 |
| Case 87 | 20 | 44,356,051  | 46,516,716  | 4 | 2 | 6  | 0 |
| Case 87 | 20 | 46,534,622  | 49,746,325  | 3 | 2 | 5  | 0 |
| Case 87 | 20 | 49,758,590  | 50,308,926  | 4 | 2 | 6  | 0 |
| Case 87 | 20 | 50,309,602  | 53,965,364  | 6 | 2 | 8  | 0 |
| Case 87 | 20 | 53,971,664  | 54,399,768  | 8 | 2 | 10 | 0 |
| Case 87 | 20 | 54,410,935  | 54,840,299  | 5 | 2 | 7  | 0 |
| Case 87 | 20 | 54,841,663  | 60,306,366  | 4 | 2 | 6  | 0 |
| Case 87 | 20 | 60,308,251  | 62,948,788  | 3 | 1 | 4  | 0 |
| Case 87 | 21 | 10,827,533  | 10,971,337  | 4 | 0 | 4  | 1 |
| Case 87 | 21 | 14,368,320  | 43,032,820  | 4 | 0 | 4  | 1 |
| Case 87 | 21 | 43,033,307  | 48,100,155  | 3 | 0 | 3  | 1 |
| Case 87 | 22 | 16,114,244  | 25,792,267  | 3 | 2 | 5  | 0 |
| Case 87 | 22 | 25,809,371  | 29,863,152  | 3 | 0 | 3  | 1 |
| Case 87 | 22 | 29,867,584  | 48,216,822  | 3 | 2 | 5  | 0 |
| Case 87 | 22 | 48,218,843  | 51,072,161  | 3 | 0 | 3  | 1 |
| Case 87 | 22 | 51,078,251  | 51,195,728  | 2 | 2 | 4  | 0 |
| Case 87 | X  | 2,700,157   | 5,587,394   | 2 | 1 | 3  | 0 |
| Case 87 | X  | 5,587,613   | 23,783,864  | 1 | 0 | 1  | 0 |
| Case 87 | X  | 23,788,151  | 58,488,110  | 2 | 1 | 3  | 0 |
| Case 87 | X  | 61,694,576  | 154,898,561 | 2 | 1 | 3  | 0 |
| Case 88 | 1  | 82,154      | 7,895,864   | 3 | 2 | 5  | 0 |
| Case 88 | 1  | 7,897,133   | 17,649,796  | 2 | 2 | 4  | 0 |
| Case 88 | 1  | 17,655,407  | 19,415,254  | 3 | 2 | 5  | 0 |
| Case 88 | 1  | 19,415,304  | 29,556,399  | 2 | 2 | 4  | 0 |
| Case 88 | 1  | 29,557,367  | 31,372,734  | 3 | 2 | 5  | 0 |
| Case 88 | 1  | 31,377,743  | 41,463,092  | 2 | 2 | 4  | 0 |
| Case 88 | 1  | 41,468,787  | 42,738,366  | 3 | 2 | 5  | 0 |
| Case 88 | 1  | 42,744,214  | 47,948,764  | 2 | 2 | 4  | 0 |
| Case 88 | 1  | 47,948,798  | 50,966,897  | 3 | 2 | 5  | 0 |
| Case 88 | 1  | 50,970,475  | 88,220,476  | 2 | 2 | 4  | 0 |
| Case 88 | 1  | 88,231,484  | 89,014,943  | 3 | 2 | 5  | 0 |
| Case 88 | 1  | 89,016,499  | 115,356,071 | 2 | 2 | 4  | 0 |
| Case 88 | 1  | 115,357,015 | 121,346,616 | 3 | 2 | 5  | 0 |
| Case 88 | 1  | 142,649,718 | 175,029,932 | 2 | 2 | 4  | 0 |
| Case 88 | 1  | 175,033,141 | 178,532,188 | 3 | 2 | 5  | 0 |
| Case 88 | 1  | 178,532,223 | 200,718,422 | 2 | 2 | 4  | 0 |
| Case 88 | 1  | 200,721,265 | 210,057,927 | 3 | 2 | 5  | 0 |
| Case 88 | 1  | 210,066,145 | 227,862,055 | 2 | 2 | 4  | 0 |
| Case 88 | 1  | 227,880,275 | 228,651,011 | 3 | 2 | 5  | 0 |
| Case 88 | 1  | 228,651,457 | 249,089,971 | 2 | 2 | 4  | 0 |
| Case 88 | 1  | 249,098,988 | 249,218,992 | 3 | 2 | 5  | 0 |

|         |   |             |             |   |   |   |   |
|---------|---|-------------|-------------|---|---|---|---|
| Case 88 | 2 | 18,674      | 23,898,317  | 3 | 2 | 5 | 0 |
| Case 88 | 2 | 23,898,966  | 29,217,896  | 2 | 2 | 4 | 0 |
| Case 88 | 2 | 29,218,411  | 31,986,063  | 3 | 2 | 5 | 0 |
| Case 88 | 2 | 32,014,315  | 34,145,755  | 2 | 2 | 4 | 0 |
| Case 88 | 2 | 34,147,024  | 38,469,908  | 3 | 2 | 5 | 0 |
| Case 88 | 2 | 38,470,492  | 39,822,983  | 2 | 2 | 4 | 0 |
| Case 88 | 2 | 39,830,183  | 43,726,006  | 3 | 2 | 5 | 0 |
| Case 88 | 2 | 43,732,823  | 44,861,910  | 2 | 2 | 4 | 0 |
| Case 88 | 2 | 44,865,678  | 47,510,324  | 3 | 2 | 5 | 0 |
| Case 88 | 2 | 47,511,181  | 48,965,022  | 2 | 2 | 4 | 0 |
| Case 88 | 2 | 48,973,162  | 55,146,720  | 3 | 2 | 5 | 0 |
| Case 88 | 2 | 55,146,868  | 56,082,610  | 2 | 2 | 4 | 0 |
| Case 88 | 2 | 56,085,261  | 60,881,975  | 3 | 2 | 5 | 0 |
| Case 88 | 2 | 60,888,202  | 62,679,582  | 2 | 2 | 4 | 0 |
| Case 88 | 2 | 62,680,153  | 92,081,640  | 3 | 2 | 5 | 0 |
| Case 88 | 2 | 95,429,424  | 99,242,245  | 3 | 2 | 5 | 0 |
| Case 88 | 2 | 99,247,820  | 102,472,459 | 2 | 2 | 4 | 0 |
| Case 88 | 2 | 102,475,463 | 135,362,981 | 3 | 2 | 5 | 0 |
| Case 88 | 2 | 135,389,197 | 136,743,490 | 2 | 2 | 4 | 0 |
| Case 88 | 2 | 136,756,554 | 156,541,170 | 3 | 2 | 5 | 0 |
| Case 88 | 2 | 156,546,655 | 168,009,405 | 2 | 2 | 4 | 0 |
| Case 88 | 2 | 168,015,952 | 170,153,674 | 3 | 2 | 5 | 0 |
| Case 88 | 2 | 170,153,975 | 175,893,333 | 2 | 2 | 4 | 0 |
| Case 88 | 2 | 175,901,341 | 209,534,957 | 3 | 2 | 5 | 0 |
| Case 88 | 2 | 209,535,670 | 217,542,888 | 2 | 2 | 4 | 0 |
| Case 88 | 2 | 217,543,499 | 221,549,153 | 3 | 2 | 5 | 0 |
| Case 88 | 2 | 221,550,136 | 231,177,904 | 2 | 2 | 4 | 0 |
| Case 88 | 2 | 231,178,876 | 243,048,760 | 3 | 2 | 5 | 0 |
| Case 88 | 3 | 61,495      | 9,300,870   | 3 | 2 | 5 | 0 |
| Case 88 | 3 | 9,302,032   | 10,342,876  | 2 | 2 | 4 | 0 |
| Case 88 | 3 | 10,342,986  | 11,079,520  | 3 | 2 | 5 | 0 |
| Case 88 | 3 | 11,080,169  | 12,864,406  | 2 | 2 | 4 | 0 |
| Case 88 | 3 | 12,864,518  | 23,209,677  | 3 | 2 | 5 | 0 |
| Case 88 | 3 | 23,214,269  | 58,562,525  | 2 | 2 | 4 | 0 |
| Case 88 | 3 | 58,563,151  | 60,256,485  | 3 | 2 | 5 | 0 |
| Case 88 | 3 | 60,257,587  | 90,442,925  | 2 | 2 | 4 | 0 |
| Case 88 | 3 | 93,537,290  | 93,611,911  | 2 | 2 | 4 | 0 |
| Case 88 | 3 | 93,612,369  | 101,231,731 | 3 | 2 | 5 | 0 |
| Case 88 | 3 | 101,231,921 | 101,805,624 | 2 | 2 | 4 | 0 |
| Case 88 | 3 | 101,807,592 | 135,720,404 | 3 | 2 | 5 | 0 |
| Case 88 | 3 | 135,720,407 | 136,751,674 | 2 | 2 | 4 | 0 |
| Case 88 | 3 | 136,752,551 | 141,275,436 | 3 | 2 | 5 | 0 |
| Case 88 | 3 | 141,278,737 | 157,172,112 | 2 | 2 | 4 | 0 |
| Case 88 | 3 | 157,178,026 | 195,517,258 | 3 | 2 | 5 | 0 |
| Case 88 | 3 | 195,517,321 | 197,838,262 | 2 | 2 | 4 | 0 |
| Case 88 | 4 | 71,566      | 49,620,898  | 2 | 2 | 4 | 0 |
| Case 88 | 4 | 52,697,856  | 133,987,761 | 2 | 2 | 4 | 0 |
| Case 88 | 4 | 134,014,299 | 156,415,404 | 3 | 2 | 5 | 0 |
| Case 88 | 4 | 156,416,305 | 190,963,766 | 2 | 2 | 4 | 0 |
| Case 88 | 5 | 38,139      | 2,123,985   | 3 | 2 | 5 | 0 |
| Case 88 | 5 | 2,129,233   | 29,729,100  | 2 | 2 | 4 | 0 |
| Case 88 | 5 | 29,729,165  | 31,305,265  | 3 | 2 | 5 | 0 |
| Case 88 | 5 | 31,315,377  | 46,399,093  | 2 | 2 | 4 | 0 |
| Case 88 | 5 | 49,457,282  | 81,319,824  | 2 | 2 | 4 | 0 |
| Case 88 | 5 | 81,324,365  | 90,317,558  | 3 | 2 | 5 | 0 |
| Case 88 | 5 | 90,348,787  | 108,550,889 | 2 | 2 | 4 | 0 |
| Case 88 | 5 | 108,554,780 | 109,058,683 | 3 | 2 | 5 | 0 |
| Case 88 | 5 | 109,065,098 | 166,634,403 | 2 | 2 | 4 | 0 |
| Case 88 | 5 | 166,649,746 | 171,273,406 | 3 | 2 | 5 | 0 |
| Case 88 | 5 | 171,274,225 | 172,656,107 | 2 | 2 | 4 | 0 |
| Case 88 | 5 | 172,657,021 | 175,176,876 | 3 | 2 | 5 | 0 |



|         |    |             |             |   |   |   |   |
|---------|----|-------------|-------------|---|---|---|---|
| Case 88 | 5  | 175,177,445 | 180,693,127 | 2 | 2 | 4 | 0 |
| Case 88 | 6  | 108,666     | 30,389,323  | 2 | 2 | 4 | 0 |
| Case 88 | 6  | 30,391,723  | 43,691,873  | 3 | 2 | 5 | 0 |
| Case 88 | 6  | 43,695,675  | 56,463,371  | 2 | 2 | 4 | 0 |
| Case 88 | 6  | 56,463,410  | 58,752,089  | 3 | 2 | 5 | 0 |
| Case 88 | 6  | 61,891,118  | 69,285,887  | 3 | 2 | 5 | 0 |
| Case 88 | 6  | 69,287,242  | 112,006,549 | 2 | 2 | 4 | 0 |
| Case 88 | 6  | 112,007,280 | 116,764,563 | 3 | 2 | 5 | 0 |
| Case 88 | 6  | 116,768,917 | 170,980,171 | 2 | 2 | 4 | 0 |
| Case 88 | 7  | 44,935      | 58,019,061  | 3 | 2 | 5 | 0 |
| Case 88 | 7  | 61,056,053  | 61,994,170  | 3 | 2 | 5 | 0 |
| Case 88 | 7  | 62,035,570  | 62,479,327  | 2 | 1 | 3 | 0 |
| Case 88 | 7  | 62,510,311  | 77,594,628  | 2 | 2 | 4 | 0 |
| Case 88 | 7  | 77,595,063  | 91,314,594  | 3 | 2 | 5 | 0 |
| Case 88 | 7  | 91,320,854  | 92,395,464  | 2 | 2 | 4 | 0 |
| Case 88 | 7  | 92,402,480  | 124,270,732 | 3 | 2 | 5 | 0 |
| Case 88 | 7  | 124,270,979 | 142,022,250 | 2 | 2 | 4 | 0 |
| Case 88 | 7  | 142,022,633 | 159,119,486 | 3 | 2 | 5 | 0 |
| Case 88 | 8  | 164,984     | 43,791,691  | 2 | 2 | 4 | 0 |
| Case 88 | 8  | 46,886,735  | 77,377,945  | 2 | 2 | 4 | 0 |
| Case 88 | 8  | 77,397,120  | 141,219,996 | 3 | 2 | 5 | 0 |
| Case 88 | 8  | 141,220,019 | 142,170,813 | 2 | 2 | 4 | 0 |
| Case 88 | 8  | 142,170,865 | 146,293,414 | 3 | 2 | 5 | 0 |
| Case 88 | 9  | 46,587      | 6,873,125   | 2 | 2 | 4 | 0 |
| Case 88 | 9  | 6,876,538   | 15,115,717  | 3 | 2 | 5 | 0 |
| Case 88 | 9  | 15,122,969  | 15,815,246  | 2 | 2 | 4 | 0 |
| Case 88 | 9  | 15,823,667  | 16,587,648  | 3 | 2 | 5 | 0 |
| Case 88 | 9  | 16,596,071  | 17,650,027  | 2 | 2 | 4 | 0 |
| Case 88 | 9  | 17,651,870  | 18,973,918  | 3 | 2 | 5 | 0 |
| Case 88 | 9  | 18,974,072  | 19,479,201  | 2 | 2 | 4 | 0 |
| Case 88 | 9  | 19,479,536  | 20,287,282  | 3 | 2 | 5 | 0 |
| Case 88 | 9  | 20,287,612  | 28,705,864  | 2 | 2 | 4 | 0 |
| Case 88 | 9  | 28,715,676  | 46,944,322  | 3 | 2 | 5 | 0 |
| Case 88 | 9  | 65,629,772  | 115,326,187 | 2 | 2 | 4 | 0 |
| Case 88 | 9  | 115,335,386 | 127,662,748 | 3 | 2 | 5 | 0 |
| Case 88 | 9  | 127,670,702 | 136,029,312 | 2 | 2 | 4 | 0 |
| Case 88 | 9  | 136,029,410 | 141,066,491 | 3 | 2 | 5 | 0 |
| Case 88 | 10 | 98,087      | 3,166,109   | 3 | 2 | 5 | 0 |
| Case 88 | 10 | 3,166,345   | 39,097,912  | 2 | 2 | 4 | 0 |
| Case 88 | 10 | 42,436,301  | 45,107,555  | 2 | 2 | 4 | 0 |
| Case 88 | 10 | 45,117,466  | 69,530,678  | 3 | 2 | 5 | 0 |
| Case 88 | 10 | 69,543,215  | 70,652,369  | 2 | 2 | 4 | 0 |
| Case 88 | 10 | 70,652,467  | 88,336,113  | 3 | 2 | 5 | 0 |
| Case 88 | 10 | 88,336,279  | 99,625,319  | 2 | 2 | 4 | 0 |
| Case 88 | 10 | 99,625,463  | 100,240,246 | 3 | 2 | 5 | 0 |
| Case 88 | 10 | 100,240,305 | 121,362,660 | 2 | 2 | 4 | 0 |
| Case 88 | 10 | 121,365,398 | 125,134,010 | 3 | 2 | 5 | 0 |
| Case 88 | 10 | 125,134,743 | 135,231,994 | 2 | 2 | 4 | 0 |
| Case 88 | 10 | 135,233,095 | 135,477,883 | 3 | 2 | 5 | 0 |
| Case 88 | 11 | 193,146     | 3,263,298   | 3 | 2 | 5 | 0 |
| Case 88 | 11 | 3,263,621   | 17,394,597  | 2 | 2 | 4 | 0 |
| Case 88 | 11 | 17,395,760  | 18,270,669  | 3 | 2 | 5 | 0 |
| Case 88 | 11 | 18,271,929  | 34,436,686  | 2 | 2 | 4 | 0 |
| Case 88 | 11 | 34,437,027  | 46,292,055  | 3 | 2 | 5 | 0 |
| Case 88 | 11 | 46,297,631  | 51,591,253  | 2 | 2 | 4 | 0 |
| Case 88 | 11 | 54,794,237  | 77,885,245  | 2 | 2 | 4 | 0 |
| Case 88 | 11 | 77,885,385  | 82,508,987  | 3 | 2 | 5 | 0 |
| Case 88 | 11 | 82,510,454  | 86,997,694  | 2 | 2 | 4 | 0 |
| Case 88 | 11 | 87,006,224  | 92,646,254  | 3 | 2 | 5 | 0 |
| Case 88 | 11 | 92,648,639  | 112,208,568 | 2 | 2 | 4 | 0 |
| Case 88 | 11 | 112,208,967 | 122,293,813 | 3 | 2 | 5 | 0 |

|         |    |             |             |   |   |   |   |
|---------|----|-------------|-------------|---|---|---|---|
| Case 88 | 11 | 122,308,215 | 123,158,221 | 2 | 2 | 4 | 0 |
| Case 88 | 11 | 123,161,406 | 134,934,063 | 3 | 2 | 5 | 0 |
| Case 88 | 12 | 191,619     | 7,730,186   | 3 | 2 | 5 | 0 |
| Case 88 | 12 | 7,735,241   | 8,146,162   | 2 | 2 | 4 | 0 |
| Case 88 | 12 | 8,161,503   | 12,172,270  | 3 | 2 | 5 | 0 |
| Case 88 | 12 | 12,173,711  | 13,126,372  | 2 | 2 | 4 | 0 |
| Case 88 | 12 | 13,126,464  | 31,411,051  | 3 | 2 | 5 | 0 |
| Case 88 | 12 | 31,413,325  | 33,118,155  | 2 | 2 | 4 | 0 |
| Case 88 | 12 | 33,119,497  | 34,781,188  | 3 | 2 | 5 | 0 |
| Case 88 | 12 | 34,801,271  | 34,853,011  | 2 | 2 | 4 | 0 |
| Case 88 | 12 | 37,876,400  | 41,958,184  | 2 | 2 | 4 | 0 |
| Case 88 | 12 | 41,959,106  | 48,062,824  | 3 | 2 | 5 | 0 |
| Case 88 | 12 | 48,063,926  | 51,926,164  | 2 | 2 | 4 | 0 |
| Case 88 | 12 | 51,930,529  | 65,110,586  | 3 | 2 | 5 | 0 |
| Case 88 | 12 | 65,113,929  | 74,007,403  | 2 | 2 | 4 | 0 |
| Case 88 | 12 | 74,012,068  | 92,969,355  | 3 | 2 | 5 | 0 |
| Case 88 | 12 | 92,977,464  | 97,073,297  | 2 | 2 | 4 | 0 |
| Case 88 | 12 | 97,074,975  | 101,671,485 | 3 | 2 | 5 | 0 |
| Case 88 | 12 | 101,673,707 | 102,711,442 | 2 | 2 | 4 | 0 |
| Case 88 | 12 | 102,714,505 | 133,810,935 | 3 | 2 | 5 | 0 |
| Case 88 | 13 | 19,058,717  | 33,307,358  | 2 | 2 | 4 | 0 |
| Case 88 | 13 | 33,307,709  | 41,068,593  | 3 | 2 | 5 | 0 |
| Case 88 | 13 | 41,071,395  | 42,073,094  | 2 | 2 | 4 | 0 |
| Case 88 | 13 | 42,077,774  | 49,795,272  | 3 | 2 | 5 | 0 |
| Case 88 | 13 | 49,795,705  | 50,703,185  | 2 | 2 | 4 | 0 |
| Case 88 | 13 | 50,709,824  | 62,321,073  | 3 | 2 | 5 | 0 |
| Case 88 | 13 | 62,332,370  | 111,637,374 | 2 | 2 | 4 | 0 |
| Case 88 | 13 | 111,638,313 | 115,103,529 | 3 | 2 | 5 | 0 |
| Case 88 | 14 | 19,280,733  | 20,445,370  | 3 | 2 | 5 | 0 |
| Case 88 | 14 | 20,445,618  | 22,169,400  | 2 | 2 | 4 | 0 |
| Case 88 | 14 | 22,179,595  | 23,021,930  | 3 | 2 | 5 | 0 |
| Case 88 | 14 | 23,022,443  | 33,651,174  | 2 | 2 | 4 | 0 |
| Case 88 | 14 | 33,651,720  | 34,697,378  | 3 | 2 | 5 | 0 |
| Case 88 | 14 | 34,697,855  | 97,790,901  | 2 | 2 | 4 | 0 |
| Case 88 | 14 | 97,792,548  | 102,210,398 | 3 | 2 | 5 | 0 |
| Case 88 | 14 | 102,238,630 | 104,381,502 | 2 | 2 | 4 | 0 |
| Case 88 | 14 | 104,381,687 | 107,287,663 | 3 | 2 | 5 | 0 |
| Case 88 | 15 | 20,034,919  | 46,073,459  | 2 | 2 | 4 | 0 |
| Case 88 | 15 | 46,078,042  | 50,548,243  | 3 | 2 | 5 | 0 |
| Case 88 | 15 | 50,549,731  | 51,289,605  | 2 | 2 | 4 | 0 |
| Case 88 | 15 | 51,289,931  | 55,381,236  | 3 | 2 | 5 | 0 |
| Case 88 | 15 | 55,382,590  | 57,731,177  | 2 | 2 | 4 | 0 |
| Case 88 | 15 | 57,731,182  | 58,591,843  | 3 | 2 | 5 | 0 |
| Case 88 | 15 | 58,592,926  | 60,895,636  | 2 | 2 | 4 | 0 |
| Case 88 | 15 | 60,899,639  | 81,917,985  | 3 | 2 | 5 | 0 |
| Case 88 | 15 | 81,932,111  | 86,631,744  | 2 | 2 | 4 | 0 |
| Case 88 | 15 | 86,632,093  | 90,059,097  | 3 | 2 | 5 | 0 |
| Case 88 | 15 | 90,060,558  | 91,751,493  | 2 | 2 | 4 | 0 |
| Case 88 | 15 | 91,754,096  | 93,132,563  | 3 | 2 | 5 | 0 |
| Case 88 | 15 | 93,135,721  | 94,167,689  | 2 | 2 | 4 | 0 |
| Case 88 | 15 | 94,177,193  | 102,461,162 | 3 | 2 | 5 | 0 |
| Case 88 | 16 | 88,165      | 2,950,185   | 3 | 2 | 5 | 0 |
| Case 88 | 16 | 2,952,423   | 29,182,179  | 2 | 2 | 4 | 0 |
| Case 88 | 16 | 29,182,190  | 35,285,582  | 3 | 2 | 5 | 0 |
| Case 88 | 16 | 46,450,037  | 53,998,930  | 2 | 2 | 4 | 0 |
| Case 88 | 16 | 54,000,792  | 56,394,035  | 3 | 2 | 5 | 0 |
| Case 88 | 16 | 56,396,486  | 85,248,324  | 2 | 2 | 4 | 0 |
| Case 88 | 16 | 85,251,237  | 90,274,695  | 3 | 2 | 5 | 0 |
| Case 88 | 17 | 11,885      | 113,794     | 3 | 2 | 5 | 0 |
| Case 88 | 17 | 114,669     | 22,242,355  | 2 | 2 | 4 | 0 |
| Case 88 | 17 | 25,268,142  | 31,094,760  | 2 | 2 | 4 | 0 |

|         |    |             |             |   |   |   |   |
|---------|----|-------------|-------------|---|---|---|---|
| Case 88 | 17 | 31,099,821  | 33,324,525  | 3 | 2 | 5 | 0 |
| Case 88 | 17 | 33,326,780  | 34,405,314  | 2 | 2 | 4 | 0 |
| Case 88 | 17 | 34,406,906  | 34,819,750  | 3 | 3 | 6 | 0 |
| Case 88 | 17 | 34,823,170  | 47,772,525  | 2 | 2 | 4 | 0 |
| Case 88 | 17 | 47,777,421  | 53,830,710  | 3 | 2 | 5 | 0 |
| Case 88 | 17 | 53,833,334  | 75,661,063  | 2 | 2 | 4 | 0 |
| Case 88 | 17 | 75,663,256  | 81,060,040  | 3 | 2 | 5 | 0 |
| Case 88 | 18 | 87,505      | 15,375,878  | 2 | 2 | 4 | 0 |
| Case 88 | 18 | 18,520,354  | 38,542,585  | 2 | 2 | 4 | 0 |
| Case 88 | 18 | 38,560,257  | 56,206,955  | 3 | 2 | 5 | 0 |
| Case 88 | 18 | 56,208,495  | 61,196,477  | 2 | 2 | 4 | 0 |
| Case 88 | 18 | 61,197,793  | 78,015,180  | 3 | 2 | 5 | 0 |
| Case 88 | 19 | 260,912     | 2,369,415   | 3 | 2 | 5 | 0 |
| Case 88 | 19 | 2,369,931   | 18,132,540  | 2 | 2 | 4 | 0 |
| Case 88 | 19 | 18,141,123  | 19,819,843  | 3 | 2 | 5 | 0 |
| Case 88 | 19 | 19,822,049  | 24,629,285  | 2 | 2 | 4 | 0 |
| Case 88 | 19 | 27,732,159  | 28,243,881  | 2 | 2 | 4 | 0 |
| Case 88 | 19 | 28,246,742  | 32,480,248  | 3 | 2 | 5 | 0 |
| Case 88 | 19 | 32,497,384  | 38,989,881  | 2 | 2 | 4 | 0 |
| Case 88 | 19 | 38,989,882  | 52,232,324  | 3 | 2 | 5 | 0 |
| Case 88 | 19 | 52,234,447  | 54,308,554  | 2 | 2 | 4 | 0 |
| Case 88 | 19 | 54,308,639  | 56,751,782  | 3 | 2 | 5 | 0 |
| Case 88 | 19 | 56,752,041  | 58,846,554  | 2 | 2 | 4 | 0 |
| Case 88 | 19 | 58,846,556  | 59,097,160  | 3 | 2 | 5 | 0 |
| Case 88 | 20 | 63,244      | 169,701     | 3 | 2 | 5 | 0 |
| Case 88 | 20 | 169,995     | 26,293,985  | 2 | 2 | 4 | 0 |
| Case 88 | 20 | 29,425,357  | 36,145,228  | 2 | 2 | 4 | 0 |
| Case 88 | 20 | 36,147,401  | 62,948,788  | 3 | 2 | 5 | 0 |
| Case 88 | 21 | 10,827,533  | 10,971,337  | 2 | 2 | 4 | 0 |
| Case 88 | 21 | 14,368,320  | 38,802,816  | 2 | 2 | 4 | 0 |
| Case 88 | 21 | 38,815,830  | 48,100,155  | 3 | 2 | 5 | 0 |
| Case 88 | 22 | 16,114,244  | 19,928,022  | 2 | 2 | 4 | 0 |
| Case 88 | 22 | 19,928,806  | 20,748,934  | 3 | 2 | 5 | 0 |
| Case 88 | 22 | 20,749,694  | 36,976,975  | 2 | 2 | 4 | 0 |
| Case 88 | 22 | 36,978,190  | 38,355,343  | 3 | 2 | 5 | 0 |
| Case 88 | 22 | 38,363,113  | 48,739,642  | 2 | 2 | 4 | 0 |
| Case 88 | 22 | 48,741,583  | 51,195,728  | 3 | 2 | 5 | 0 |
| Case 88 | X  | 2,700,157   | 29,361,889  | 3 | 2 | 5 | 0 |
| Case 88 | X  | 29,372,188  | 30,948,624  | 2 | 2 | 4 | 0 |
| Case 88 | X  | 30,954,114  | 58,488,110  | 3 | 2 | 5 | 0 |
| Case 88 | X  | 61,694,576  | 154,898,561 | 3 | 2 | 5 | 0 |
| Case 89 | 1  | 82,154      | 874,501     | 2 | 1 | 3 | 0 |
| Case 89 | 1  | 874,673     | 29,611,369  | 1 | 0 | 1 | 0 |
| Case 89 | 1  | 29,616,224  | 74,858,724  | 2 | 1 | 3 | 0 |
| Case 89 | 1  | 74,858,887  | 74,907,316  | 4 | 2 | 6 | 0 |
| Case 89 | 1  | 74,918,027  | 121,346,616 | 2 | 1 | 3 | 0 |
| Case 89 | 1  | 142,649,718 | 145,101,177 | 3 | 1 | 4 | 0 |
| Case 89 | 1  | 145,103,644 | 145,704,639 | 5 | 0 | 5 | 1 |
| Case 89 | 1  | 145,723,120 | 147,826,789 | 6 | 0 | 6 | 1 |
| Case 89 | 1  | 148,003,653 | 150,864,164 | 2 | 1 | 3 | 0 |
| Case 89 | 1  | 150,884,271 | 151,773,167 | 3 | 0 | 3 | 1 |
| Case 89 | 1  | 151,773,851 | 153,801,098 | 3 | 1 | 4 | 0 |
| Case 89 | 1  | 153,805,735 | 154,918,277 | 5 | 0 | 5 | 1 |
| Case 89 | 1  | 154,918,369 | 164,339,179 | 4 | 1 | 5 | 0 |
| Case 89 | 1  | 164,348,564 | 166,191,677 | 5 | 0 | 5 | 1 |
| Case 89 | 1  | 166,206,684 | 170,632,808 | 4 | 1 | 5 | 0 |
| Case 89 | 1  | 170,633,397 | 176,833,497 | 1 | 0 | 1 | 0 |
| Case 89 | 1  | 176,833,571 | 177,487,136 | 2 | 1 | 3 | 0 |
| Case 89 | 1  | 177,493,799 | 241,603,554 | 3 | 1 | 4 | 0 |
| Case 89 | 1  | 241,608,403 | 241,822,182 | 1 | 0 | 1 | 0 |
| Case 89 | 1  | 241,823,862 | 245,170,495 | 3 | 1 | 4 | 0 |

|         |   |             |             |   |   |   |   |
|---------|---|-------------|-------------|---|---|---|---|
| Case 89 | 1 | 245,173,460 | 245,205,890 | 4 | 1 | 5 | 0 |
| Case 89 | 1 | 245,219,054 | 249,218,992 | 3 | 1 | 4 | 0 |
| Case 89 | 2 | 18,674      | 14,078,213  | 2 | 1 | 3 | 0 |
| Case 89 | 2 | 14,078,931  | 51,643,322  | 2 | 2 | 4 | 0 |
| Case 89 | 2 | 51,648,736  | 92,081,640  | 2 | 1 | 3 | 0 |
| Case 89 | 2 | 95,429,424  | 173,694,029 | 2 | 1 | 3 | 0 |
| Case 89 | 2 | 173,699,252 | 175,353,898 | 2 | 2 | 4 | 0 |
| Case 89 | 2 | 175,360,010 | 194,807,107 | 2 | 1 | 3 | 0 |
| Case 89 | 2 | 194,837,858 | 199,414,462 | 3 | 1 | 4 | 0 |
| Case 89 | 2 | 199,438,565 | 241,382,083 | 2 | 1 | 3 | 0 |
| Case 89 | 2 | 241,385,787 | 242,971,871 | 1 | 1 | 2 | 0 |
| Case 89 | 2 | 242,996,474 | 243,048,760 | 2 | 2 | 4 | 0 |
| Case 89 | 3 | 61,495      | 565,961     | 2 | 2 | 4 | 0 |
| Case 89 | 3 | 580,021     | 21,851,803  | 2 | 1 | 3 | 0 |
| Case 89 | 3 | 21,852,139  | 47,777,612  | 2 | 0 | 2 | 1 |
| Case 89 | 3 | 47,777,774  | 77,885,601  | 2 | 1 | 3 | 0 |
| Case 89 | 3 | 77,887,303  | 79,927,812  | 2 | 0 | 2 | 1 |
| Case 89 | 3 | 79,951,653  | 81,898,999  | 2 | 1 | 3 | 0 |
| Case 89 | 3 | 81,905,441  | 84,244,787  | 2 | 0 | 2 | 1 |
| Case 89 | 3 | 84,245,741  | 86,571,808  | 2 | 1 | 3 | 0 |
| Case 89 | 3 | 86,573,780  | 90,442,925  | 2 | 0 | 2 | 1 |
| Case 89 | 3 | 93,537,290  | 114,889,454 | 2 | 0 | 2 | 1 |
| Case 89 | 3 | 114,913,508 | 120,601,829 | 2 | 1 | 3 | 0 |
| Case 89 | 3 | 120,604,574 | 173,424,373 | 2 | 2 | 4 | 0 |
| Case 89 | 3 | 173,431,705 | 197,838,262 | 2 | 0 | 2 | 1 |
| Case 89 | 4 | 71,566      | 905,524     | 2 | 0 | 2 | 1 |
| Case 89 | 4 | 924,280     | 2,517,447   | 2 | 1 | 3 | 0 |
| Case 89 | 4 | 2,559,990   | 6,072,923   | 2 | 0 | 2 | 1 |
| Case 89 | 4 | 6,075,470   | 6,213,622   | 2 | 1 | 3 | 0 |
| Case 89 | 4 | 6,218,099   | 31,890,470  | 2 | 0 | 2 | 1 |
| Case 89 | 4 | 31,893,113  | 48,437,360  | 2 | 1 | 3 | 0 |
| Case 89 | 4 | 48,459,365  | 49,620,898  | 2 | 2 | 4 | 0 |
| Case 89 | 4 | 52,697,856  | 55,049,751  | 2 | 2 | 4 | 0 |
| Case 89 | 4 | 55,061,398  | 86,916,193  | 3 | 0 | 3 | 1 |
| Case 89 | 4 | 86,916,225  | 171,327,181 | 2 | 0 | 2 | 1 |
| Case 89 | 4 | 171,339,965 | 171,853,059 | 4 | 0 | 4 | 1 |
| Case 89 | 4 | 171,860,973 | 188,311,821 | 3 | 0 | 3 | 1 |
| Case 89 | 4 | 188,317,381 | 190,963,766 | 2 | 0 | 2 | 1 |
| Case 89 | 5 | 38,139      | 28,888,774  | 2 | 1 | 3 | 0 |
| Case 89 | 5 | 28,899,999  | 46,117,770  | 2 | 2 | 4 | 0 |
| Case 89 | 5 | 46,127,095  | 46,399,093  | 1 | 1 | 2 | 0 |
| Case 89 | 5 | 49,457,282  | 49,694,961  | 1 | 0 | 1 | 0 |
| Case 89 | 5 | 49,695,761  | 139,295,821 | 2 | 0 | 2 | 1 |
| Case 89 | 5 | 139,303,341 | 165,160,664 | 3 | 0 | 3 | 1 |
| Case 89 | 5 | 165,170,651 | 180,338,584 | 2 | 0 | 2 | 1 |
| Case 89 | 5 | 180,338,602 | 180,693,127 | 3 | 0 | 3 | 1 |
| Case 89 | 6 | 108,666     | 58,752,089  | 2 | 1 | 3 | 0 |
| Case 89 | 6 | 61,891,118  | 169,334,898 | 2 | 1 | 3 | 0 |
| Case 89 | 6 | 169,338,671 | 170,382,923 | 1 | 1 | 2 | 0 |
| Case 89 | 6 | 170,384,030 | 170,980,171 | 3 | 1 | 4 | 0 |
| Case 89 | 7 | 44,935      | 7,097,895   | 2 | 2 | 4 | 0 |
| Case 89 | 7 | 7,116,397   | 13,753,853  | 3 | 2 | 5 | 0 |
| Case 89 | 7 | 13,755,474  | 38,288,270  | 2 | 2 | 4 | 0 |
| Case 89 | 7 | 38,291,851  | 38,358,412  | 3 | 3 | 6 | 0 |
| Case 89 | 7 | 38,358,956  | 58,019,061  | 2 | 2 | 4 | 0 |
| Case 89 | 7 | 61,056,053  | 97,044,705  | 2 | 2 | 4 | 0 |
| Case 89 | 7 | 97,061,931  | 158,519,615 | 2 | 0 | 2 | 1 |
| Case 89 | 7 | 158,524,763 | 159,119,486 | 3 | 0 | 3 | 1 |
| Case 89 | 8 | 164,984     | 714,648     | 1 | 0 | 1 | 0 |
| Case 89 | 8 | 719,043     | 2,523,398   | 8 | 0 | 8 | 1 |
| Case 89 | 8 | 2,527,251   | 3,029,364   | 7 | 0 | 7 | 1 |

|         |    |             |             |    |   |    |   |
|---------|----|-------------|-------------|----|---|----|---|
| Case 89 | 8  | 3,030,335   | 3,496,633   | 10 | 0 | 10 | 1 |
| Case 89 | 8  | 3,500,352   | 9,290,056   | 5  | 0 | 5  | 1 |
| Case 89 | 8  | 9,290,753   | 9,745,798   | 0  | 0 | 0  | 0 |
| Case 89 | 8  | 9,758,230   | 10,044,801  | 6  | 0 | 6  | 1 |
| Case 89 | 8  | 10,046,638  | 11,860,845  | 9  | 0 | 9  | 1 |
| Case 89 | 8  | 12,181,277  | 13,027,912  | 7  | 0 | 7  | 1 |
| Case 89 | 8  | 13,034,369  | 13,923,923  | 3  | 0 | 3  | 1 |
| Case 89 | 8  | 13,924,510  | 14,844,324  | 11 | 0 | 11 | 1 |
| Case 89 | 8  | 14,848,938  | 15,931,373  | 10 | 0 | 10 | 1 |
| Case 89 | 8  | 15,932,333  | 16,272,892  | 7  | 0 | 7  | 1 |
| Case 89 | 8  | 16,282,259  | 20,576,344  | 3  | 0 | 3  | 1 |
| Case 89 | 8  | 20,576,761  | 35,316,657  | 2  | 0 | 2  | 1 |
| Case 89 | 8  | 35,316,788  | 39,399,057  | 2  | 2 | 4  | 0 |
| Case 89 | 8  | 39,403,894  | 43,413,955  | 2  | 1 | 3  | 0 |
| Case 89 | 8  | 43,414,155  | 43,791,691  | 1  | 1 | 2  | 0 |
| Case 89 | 8  | 46,886,735  | 51,465,681  | 1  | 1 | 2  | 0 |
| Case 89 | 8  | 51,465,733  | 67,909,062  | 2  | 1 | 3  | 0 |
| Case 89 | 8  | 67,922,949  | 69,132,033  | 2  | 2 | 4  | 0 |
| Case 89 | 8  | 69,133,585  | 74,853,706  | 2  | 1 | 3  | 0 |
| Case 89 | 8  | 74,861,484  | 75,101,074  | 3  | 1 | 4  | 0 |
| Case 89 | 8  | 75,109,785  | 77,243,452  | 2  | 1 | 3  | 0 |
| Case 89 | 8  | 77,246,394  | 78,298,314  | 3  | 1 | 4  | 0 |
| Case 89 | 8  | 78,322,385  | 81,640,595  | 1  | 1 | 2  | 0 |
| Case 89 | 8  | 81,677,834  | 87,146,973  | 2  | 1 | 3  | 0 |
| Case 89 | 8  | 87,148,991  | 88,156,383  | 3  | 1 | 4  | 0 |
| Case 89 | 8  | 88,166,193  | 89,006,607  | 2  | 1 | 3  | 0 |
| Case 89 | 8  | 89,007,711  | 123,088,145 | 1  | 1 | 2  | 0 |
| Case 89 | 8  | 123,093,555 | 146,293,414 | 2  | 1 | 3  | 0 |
| Case 89 | 9  | 46,587      | 33,058,162  | 2  | 0 | 2  | 1 |
| Case 89 | 9  | 33,062,154  | 37,055,109  | 3  | 0 | 3  | 1 |
| Case 89 | 9  | 37,056,373  | 46,944,322  | 2  | 0 | 2  | 1 |
| Case 89 | 9  | 65,629,772  | 75,872,324  | 1  | 0 | 1  | 0 |
| Case 89 | 9  | 75,877,116  | 77,516,005  | 5  | 0 | 5  | 1 |
| Case 89 | 9  | 77,516,923  | 78,369,864  | 6  | 0 | 6  | 1 |
| Case 89 | 9  | 78,369,986  | 83,539,913  | 5  | 0 | 5  | 1 |
| Case 89 | 9  | 83,540,744  | 83,599,708  | 3  | 0 | 3  | 1 |
| Case 89 | 9  | 83,603,221  | 86,231,370  | 5  | 0 | 5  | 1 |
| Case 89 | 9  | 86,232,809  | 86,796,094  | 2  | 0 | 2  | 1 |
| Case 89 | 9  | 86,802,590  | 87,118,778  | 5  | 0 | 5  | 1 |
| Case 89 | 9  | 87,125,877  | 87,325,623  | 3  | 0 | 3  | 1 |
| Case 89 | 9  | 87,338,511  | 98,488,882  | 5  | 0 | 5  | 1 |
| Case 89 | 9  | 98,493,505  | 118,070,259 | 2  | 0 | 2  | 1 |
| Case 89 | 9  | 118,073,084 | 118,397,913 | 5  | 0 | 5  | 1 |
| Case 89 | 9  | 118,405,173 | 119,901,378 | 3  | 0 | 3  | 1 |
| Case 89 | 9  | 119,903,506 | 122,308,536 | 4  | 0 | 4  | 1 |
| Case 89 | 9  | 122,312,068 | 126,220,148 | 2  | 0 | 2  | 1 |
| Case 89 | 9  | 126,227,862 | 127,031,054 | 1  | 0 | 1  | 0 |
| Case 89 | 9  | 127,035,761 | 135,241,588 | 2  | 0 | 2  | 1 |
| Case 89 | 9  | 135,245,867 | 141,066,491 | 4  | 0 | 4  | 1 |
| Case 89 | 10 | 98,087      | 16,535,688  | 2  | 0 | 2  | 1 |
| Case 89 | 10 | 16,535,888  | 16,572,258  | 4  | 0 | 4  | 1 |
| Case 89 | 10 | 16,581,629  | 16,725,247  | 2  | 0 | 2  | 1 |
| Case 89 | 10 | 16,728,869  | 16,873,816  | 3  | 0 | 3  | 1 |
| Case 89 | 10 | 16,876,107  | 39,097,912  | 2  | 0 | 2  | 1 |
| Case 89 | 10 | 42,436,301  | 42,682,133  | 2  | 0 | 2  | 1 |
| Case 89 | 10 | 42,725,663  | 110,610,160 | 2  | 1 | 3  | 0 |
| Case 89 | 10 | 110,612,757 | 135,477,883 | 3  | 0 | 3  | 1 |
| Case 89 | 11 | 193,146     | 4,729,164   | 2  | 0 | 2  | 1 |
| Case 89 | 11 | 4,730,320   | 7,670,160   | 3  | 0 | 3  | 1 |
| Case 89 | 11 | 7,670,353   | 10,673,688  | 2  | 1 | 3  | 0 |
| Case 89 | 11 | 10,673,739  | 15,398,601  | 3  | 2 | 5  | 0 |

|         |    |             |             |   |   |   |   |
|---------|----|-------------|-------------|---|---|---|---|
| Case 89 | 11 | 15,401,144  | 39,593,038  | 2 | 2 | 4 | 0 |
| Case 89 | 11 | 39,604,010  | 42,246,718  | 3 | 2 | 5 | 0 |
| Case 89 | 11 | 42,247,461  | 43,197,227  | 2 | 2 | 4 | 0 |
| Case 89 | 11 | 43,199,535  | 44,502,787  | 3 | 2 | 5 | 0 |
| Case 89 | 11 | 44,506,198  | 50,296,502  | 2 | 2 | 4 | 0 |
| Case 89 | 11 | 50,325,741  | 51,591,253  | 2 | 0 | 2 | 1 |
| Case 89 | 11 | 54,794,237  | 55,027,673  | 2 | 0 | 2 | 1 |
| Case 89 | 11 | 55,028,549  | 83,215,072  | 2 | 1 | 3 | 0 |
| Case 89 | 11 | 83,231,580  | 89,843,478  | 4 | 1 | 5 | 0 |
| Case 89 | 11 | 89,843,565  | 92,694,757  | 3 | 2 | 5 | 0 |
| Case 89 | 11 | 92,701,596  | 99,644,668  | 4 | 0 | 4 | 1 |
| Case 89 | 11 | 99,646,237  | 99,854,317  | 5 | 0 | 5 | 1 |
| Case 89 | 11 | 99,855,646  | 107,729,106 | 4 | 0 | 4 | 1 |
| Case 89 | 11 | 107,729,615 | 109,812,865 | 5 | 0 | 5 | 1 |
| Case 89 | 11 | 109,825,345 | 134,430,272 | 2 | 0 | 2 | 1 |
| Case 89 | 11 | 134,432,050 | 134,934,063 | 3 | 0 | 3 | 1 |
| Case 89 | 12 | 191,619     | 9,362,104   | 4 | 1 | 5 | 0 |
| Case 89 | 12 | 9,362,931   | 11,810,846  | 5 | 1 | 6 | 0 |
| Case 89 | 12 | 11,812,330  | 11,877,420  | 4 | 2 | 6 | 0 |
| Case 89 | 12 | 11,888,423  | 18,402,485  | 2 | 0 | 2 | 1 |
| Case 89 | 12 | 18,408,596  | 33,778,550  | 2 | 2 | 4 | 0 |
| Case 89 | 12 | 33,788,835  | 34,853,011  | 2 | 1 | 3 | 0 |
| Case 89 | 12 | 37,876,400  | 46,531,876  | 2 | 1 | 3 | 0 |
| Case 89 | 12 | 46,537,244  | 49,982,238  | 2 | 2 | 4 | 0 |
| Case 89 | 12 | 49,982,242  | 124,553,029 | 2 | 1 | 3 | 0 |
| Case 89 | 12 | 124,561,803 | 124,667,587 | 3 | 2 | 5 | 0 |
| Case 89 | 12 | 124,668,064 | 128,244,331 | 2 | 2 | 4 | 0 |
| Case 89 | 12 | 128,245,575 | 133,642,499 | 2 | 1 | 3 | 0 |
| Case 89 | 12 | 133,647,690 | 133,810,935 | 2 | 2 | 4 | 0 |
| Case 89 | 13 | 19,058,717  | 20,688,590  | 3 | 1 | 4 | 0 |
| Case 89 | 13 | 20,689,298  | 21,473,952  | 2 | 1 | 3 | 0 |
| Case 89 | 13 | 21,483,113  | 37,881,141  | 3 | 0 | 3 | 1 |
| Case 89 | 13 | 37,882,220  | 37,968,151  | 1 | 0 | 1 | 0 |
| Case 89 | 13 | 37,969,197  | 43,469,222  | 3 | 0 | 3 | 1 |
| Case 89 | 13 | 43,471,403  | 43,768,575  | 3 | 2 | 5 | 0 |
| Case 89 | 13 | 43,769,263  | 55,703,495  | 3 | 0 | 3 | 1 |
| Case 89 | 13 | 55,711,560  | 58,768,674  | 2 | 1 | 3 | 0 |
| Case 89 | 13 | 58,769,062  | 59,608,726  | 3 | 0 | 3 | 1 |
| Case 89 | 13 | 59,613,195  | 60,845,246  | 2 | 2 | 4 | 0 |
| Case 89 | 13 | 60,846,341  | 63,277,176  | 2 | 1 | 3 | 0 |
| Case 89 | 13 | 63,280,874  | 68,491,550  | 1 | 0 | 1 | 0 |
| Case 89 | 13 | 68,505,870  | 69,093,271  | 2 | 0 | 2 | 1 |
| Case 89 | 13 | 69,094,224  | 72,882,258  | 1 | 0 | 1 | 0 |
| Case 89 | 13 | 72,887,795  | 76,721,792  | 3 | 0 | 3 | 1 |
| Case 89 | 13 | 76,726,422  | 77,847,651  | 3 | 2 | 5 | 0 |
| Case 89 | 13 | 77,854,638  | 81,289,215  | 2 | 2 | 4 | 0 |
| Case 89 | 13 | 81,290,907  | 88,040,398  | 2 | 1 | 3 | 0 |
| Case 89 | 13 | 88,047,853  | 89,192,085  | 2 | 0 | 2 | 1 |
| Case 89 | 13 | 89,193,343  | 113,110,185 | 3 | 0 | 3 | 1 |
| Case 89 | 13 | 113,110,663 | 114,740,938 | 2 | 0 | 2 | 1 |
| Case 89 | 13 | 114,746,660 | 115,103,529 | 3 | 0 | 3 | 1 |
| Case 89 | 14 | 19,280,733  | 20,478,763  | 3 | 1 | 4 | 0 |
| Case 89 | 14 | 20,480,547  | 22,340,127  | 2 | 1 | 3 | 0 |
| Case 89 | 14 | 22,340,647  | 22,988,571  | 3 | 1 | 4 | 0 |
| Case 89 | 14 | 22,997,833  | 76,696,207  | 2 | 1 | 3 | 0 |
| Case 89 | 14 | 76,697,813  | 76,805,927  | 3 | 1 | 4 | 0 |
| Case 89 | 14 | 76,806,538  | 80,757,649  | 2 | 1 | 3 | 0 |
| Case 89 | 14 | 80,768,079  | 107,287,663 | 1 | 1 | 2 | 0 |
| Case 89 | 15 | 20,034,919  | 24,327,659  | 2 | 0 | 2 | 1 |
| Case 89 | 15 | 24,328,497  | 26,428,488  | 2 | 2 | 4 | 0 |
| Case 89 | 15 | 26,440,143  | 43,769,931  | 2 | 0 | 2 | 1 |

|         |    |            |             |   |   |   |   |
|---------|----|------------|-------------|---|---|---|---|
| Case 89 | 15 | 43,771,694 | 44,109,452  | 2 | 2 | 4 | 0 |
| Case 89 | 15 | 44,116,053 | 64,446,794  | 2 | 0 | 2 | 1 |
| Case 89 | 15 | 64,448,304 | 75,925,592  | 2 | 2 | 4 | 0 |
| Case 89 | 15 | 75,927,717 | 102,461,162 | 2 | 1 | 3 | 0 |
| Case 89 | 16 | 88,165     | 524,305     | 3 | 0 | 3 | 1 |
| Case 89 | 16 | 532,645    | 6,701,566   | 2 | 0 | 2 | 1 |
| Case 89 | 16 | 6,703,929  | 6,796,804   | 1 | 0 | 1 | 0 |
| Case 89 | 16 | 6,796,866  | 35,285,582  | 2 | 0 | 2 | 1 |
| Case 89 | 16 | 46,450,037 | 48,061,138  | 2 | 0 | 2 | 1 |
| Case 89 | 16 | 48,066,750 | 48,879,453  | 4 | 0 | 4 | 1 |
| Case 89 | 16 | 48,879,459 | 49,476,172  | 5 | 0 | 5 | 1 |
| Case 89 | 16 | 49,480,335 | 90,274,695  | 2 | 0 | 2 | 1 |
| Case 89 | 17 | 11,885     | 21,318,753  | 2 | 0 | 2 | 1 |
| Case 89 | 17 | 21,318,760 | 22,242,355  | 2 | 1 | 3 | 0 |
| Case 89 | 17 | 25,268,142 | 31,317,698  | 2 | 1 | 3 | 0 |
| Case 89 | 17 | 31,318,829 | 33,349,270  | 3 | 1 | 4 | 0 |
| Case 89 | 17 | 33,351,917 | 35,746,196  | 3 | 0 | 3 | 1 |
| Case 89 | 17 | 35,748,867 | 37,922,295  | 2 | 1 | 3 | 0 |
| Case 89 | 17 | 37,922,339 | 38,248,354  | 3 | 0 | 3 | 1 |
| Case 89 | 17 | 38,250,046 | 38,609,187  | 2 | 1 | 3 | 0 |
| Case 89 | 17 | 38,610,665 | 46,262,171  | 2 | 2 | 4 | 0 |
| Case 89 | 17 | 46,291,414 | 46,407,434  | 3 | 3 | 6 | 0 |
| Case 89 | 17 | 46,411,500 | 47,960,806  | 2 | 2 | 4 | 0 |
| Case 89 | 17 | 47,967,675 | 48,106,403  | 3 | 1 | 4 | 0 |
| Case 89 | 17 | 48,108,052 | 49,459,341  | 2 | 2 | 4 | 0 |
| Case 89 | 17 | 49,461,290 | 49,876,461  | 3 | 1 | 4 | 0 |
| Case 89 | 17 | 49,877,896 | 50,760,873  | 2 | 2 | 4 | 0 |
| Case 89 | 17 | 50,765,191 | 51,831,506  | 3 | 0 | 3 | 1 |
| Case 89 | 17 | 51,848,808 | 54,215,810  | 2 | 1 | 3 | 0 |
| Case 89 | 17 | 54,217,491 | 54,990,964  | 3 | 0 | 3 | 1 |
| Case 89 | 17 | 55,010,062 | 56,056,706  | 2 | 1 | 3 | 0 |
| Case 89 | 17 | 56,057,181 | 57,641,506  | 3 | 0 | 3 | 1 |
| Case 89 | 17 | 57,651,101 | 59,372,034  | 2 | 1 | 3 | 0 |
| Case 89 | 17 | 59,374,867 | 60,018,352  | 3 | 0 | 3 | 1 |
| Case 89 | 17 | 60,018,875 | 65,587,499  | 2 | 2 | 4 | 0 |
| Case 89 | 17 | 65,599,398 | 65,994,627  | 2 | 1 | 3 | 0 |
| Case 89 | 17 | 65,994,679 | 67,542,493  | 3 | 0 | 3 | 1 |
| Case 89 | 17 | 67,554,920 | 81,060,040  | 2 | 1 | 3 | 0 |
| Case 89 | 18 | 87,505     | 4,797,073   | 4 | 2 | 6 | 0 |
| Case 89 | 18 | 4,798,533  | 5,015,145   | 5 | 1 | 6 | 0 |
| Case 89 | 18 | 5,020,501  | 5,398,134   | 2 | 1 | 3 | 0 |
| Case 89 | 18 | 5,405,326  | 10,275,935  | 4 | 1 | 5 | 0 |
| Case 89 | 18 | 10,276,815 | 15,102,421  | 5 | 0 | 5 | 1 |
| Case 89 | 18 | 15,249,516 | 15,375,878  | 2 | 1 | 3 | 0 |
| Case 89 | 18 | 18,520,354 | 20,346,007  | 2 | 1 | 3 | 0 |
| Case 89 | 18 | 20,354,747 | 48,505,414  | 2 | 0 | 2 | 1 |
| Case 89 | 18 | 48,510,505 | 49,765,016  | 1 | 0 | 1 | 0 |
| Case 89 | 18 | 49,770,823 | 74,164,946  | 4 | 0 | 4 | 1 |
| Case 89 | 18 | 74,169,329 | 78,015,180  | 3 | 1 | 4 | 0 |
| Case 89 | 19 | 260,912    | 2,609,815   | 1 | 1 | 2 | 0 |
| Case 89 | 19 | 2,617,422  | 17,212,570  | 2 | 1 | 3 | 0 |
| Case 89 | 19 | 17,212,571 | 23,927,522  | 1 | 1 | 2 | 0 |
| Case 89 | 19 | 23,927,795 | 24,629,285  | 2 | 1 | 3 | 0 |
| Case 89 | 19 | 27,732,159 | 56,657,388  | 2 | 1 | 3 | 0 |
| Case 89 | 19 | 56,659,742 | 56,684,824  | 1 | 0 | 1 | 0 |
| Case 89 | 19 | 56,685,463 | 59,097,160  | 2 | 1 | 3 | 0 |
| Case 89 | 20 | 63,244     | 304,086     | 2 | 1 | 3 | 0 |
| Case 89 | 20 | 309,692    | 16,655,964  | 1 | 1 | 2 | 0 |
| Case 89 | 20 | 16,659,448 | 26,293,985  | 1 | 0 | 1 | 0 |
| Case 89 | 20 | 29,425,357 | 29,445,644  | 1 | 0 | 1 | 0 |
| Case 89 | 20 | 29,507,776 | 42,264,653  | 3 | 1 | 4 | 0 |

|         |    |             |             |   |   |   |   |
|---------|----|-------------|-------------|---|---|---|---|
| Case 89 | 20 | 42,265,804  | 46,827,141  | 3 | 2 | 5 | 0 |
| Case 89 | 20 | 46,828,160  | 50,455,228  | 7 | 1 | 8 | 0 |
| Case 89 | 20 | 50,459,530  | 51,808,899  | 8 | 1 | 9 | 0 |
| Case 89 | 20 | 51,810,111  | 53,619,811  | 6 | 2 | 8 | 0 |
| Case 89 | 20 | 53,620,423  | 61,302,510  | 3 | 1 | 4 | 0 |
| Case 89 | 20 | 61,303,004  | 62,948,788  | 2 | 1 | 3 | 0 |
| Case 89 | 21 | 10,827,533  | 10,971,337  | 2 | 0 | 2 | 1 |
| Case 89 | 21 | 14,368,320  | 48,100,155  | 2 | 0 | 2 | 1 |
| Case 89 | 22 | 16,114,244  | 27,113,741  | 2 | 0 | 2 | 1 |
| Case 89 | 22 | 27,118,181  | 28,042,532  | 3 | 0 | 3 | 1 |
| Case 89 | 22 | 28,045,229  | 51,195,728  | 2 | 0 | 2 | 1 |
| Case 89 | X  | 2,700,157   | 58,488,110  | 1 | 0 | 1 | 0 |
| Case 89 | X  | 61,694,576  | 154,898,561 | 1 | 0 | 1 | 0 |
| Case 91 | 1  | 82,154      | 121,346,616 | 1 | 1 | 2 | 0 |
| Case 91 | 1  | 142,649,718 | 215,301,524 | 1 | 1 | 2 | 0 |
| Case 91 | 1  | 215,307,777 | 216,144,049 | 1 | 0 | 1 | 0 |
| Case 91 | 1  | 216,151,789 | 249,218,992 | 1 | 1 | 2 | 0 |
| Case 91 | 2  | 18,674      | 92,081,640  | 1 | 1 | 2 | 0 |
| Case 91 | 2  | 95,429,424  | 243,048,760 | 1 | 1 | 2 | 0 |
| Case 91 | 3  | 61,495      | 59,877,988  | 1 | 0 | 1 | 0 |
| Case 91 | 3  | 59,878,365  | 59,920,912  | 0 | 0 | 0 | 0 |
| Case 91 | 3  | 59,921,786  | 60,374,028  | 1 | 0 | 1 | 0 |
| Case 91 | 3  | 60,379,253  | 60,647,540  | 0 | 0 | 0 | 0 |
| Case 91 | 3  | 60,655,448  | 76,114,576  | 1 | 0 | 1 | 0 |
| Case 91 | 3  | 76,118,545  | 90,442,925  | 2 | 0 | 2 | 1 |
| Case 91 | 3  | 93,537,290  | 197,838,262 | 2 | 0 | 2 | 1 |
| Case 91 | 4  | 71,566      | 49,620,898  | 1 | 1 | 2 | 0 |
| Case 91 | 4  | 52,697,856  | 190,963,766 | 1 | 1 | 2 | 0 |
| Case 91 | 5  | 38,139      | 32,101,400  | 1 | 1 | 2 | 0 |
| Case 91 | 5  | 32,107,381  | 32,217,141  | 2 | 1 | 3 | 0 |
| Case 91 | 5  | 32,221,259  | 46,399,093  | 1 | 1 | 2 | 0 |
| Case 91 | 5  | 49,457,282  | 180,693,127 | 1 | 1 | 2 | 0 |
| Case 91 | 6  | 108,666     | 58,752,089  | 1 | 0 | 1 | 0 |
| Case 91 | 6  | 61,891,118  | 170,980,171 | 1 | 0 | 1 | 0 |
| Case 91 | 7  | 44,935      | 38,297,145  | 1 | 1 | 2 | 0 |
| Case 91 | 7  | 38,298,285  | 38,371,474  | 2 | 1 | 3 | 0 |
| Case 91 | 7  | 38,374,697  | 58,019,061  | 1 | 1 | 2 | 0 |
| Case 91 | 7  | 61,056,053  | 159,119,486 | 1 | 1 | 2 | 0 |
| Case 91 | 8  | 164,984     | 2,135,762   | 1 | 1 | 2 | 0 |
| Case 91 | 8  | 2,142,267   | 2,214,734   | 2 | 1 | 3 | 0 |
| Case 91 | 8  | 2,214,787   | 43,791,691  | 1 | 1 | 2 | 0 |
| Case 91 | 8  | 46,886,735  | 49,637,360  | 1 | 1 | 2 | 0 |
| Case 91 | 8  | 49,642,398  | 146,293,414 | 2 | 1 | 3 | 0 |
| Case 91 | 9  | 46,587      | 46,944,322  | 1 | 1 | 2 | 0 |
| Case 91 | 9  | 65,629,772  | 96,534,118  | 1 | 1 | 2 | 0 |
| Case 91 | 9  | 96,534,292  | 118,170,889 | 2 | 0 | 2 | 1 |
| Case 91 | 9  | 118,173,811 | 118,286,802 | 3 | 0 | 3 | 1 |
| Case 91 | 9  | 118,287,508 | 141,066,491 | 2 | 0 | 2 | 1 |
| Case 91 | 10 | 98,087      | 39,097,912  | 1 | 1 | 2 | 0 |
| Case 91 | 10 | 42,436,301  | 135,477,883 | 1 | 1 | 2 | 0 |
| Case 91 | 11 | 193,146     | 51,591,253  | 1 | 1 | 2 | 0 |
| Case 91 | 11 | 54,794,237  | 134,934,063 | 1 | 1 | 2 | 0 |
| Case 91 | 12 | 191,619     | 34,853,011  | 2 | 0 | 2 | 1 |
| Case 91 | 12 | 37,876,400  | 133,810,935 | 2 | 0 | 2 | 1 |
| Case 91 | 13 | 19,058,717  | 115,103,529 | 1 | 1 | 2 | 0 |
| Case 91 | 14 | 19,280,733  | 22,595,277  | 1 | 1 | 2 | 0 |
| Case 91 | 14 | 22,597,335  | 22,977,222  | 2 | 1 | 3 | 0 |
| Case 91 | 14 | 22,978,335  | 107,287,663 | 1 | 1 | 2 | 0 |
| Case 91 | 15 | 20,034,919  | 102,461,162 | 1 | 1 | 2 | 0 |
| Case 91 | 16 | 88,165      | 35,285,582  | 1 | 1 | 2 | 0 |
| Case 91 | 16 | 46,450,037  | 78,635,695  | 1 | 1 | 2 | 0 |



|         |    |             |             |   |   |   |   |
|---------|----|-------------|-------------|---|---|---|---|
| Case 91 | 16 | 78,641,740  | 78,883,118  | 1 | 0 | 1 | 0 |
| Case 91 | 16 | 78,885,182  | 79,906,401  | 1 | 1 | 2 | 0 |
| Case 91 | 16 | 79,914,909  | 80,440,301  | 2 | 1 | 3 | 0 |
| Case 91 | 16 | 80,440,352  | 90,274,695  | 1 | 1 | 2 | 0 |
| Case 91 | 17 | 11,885      | 15,976,786  | 2 | 0 | 2 | 1 |
| Case 91 | 17 | 15,976,868  | 22,242,355  | 1 | 1 | 2 | 0 |
| Case 91 | 17 | 25,268,142  | 81,060,040  | 1 | 1 | 2 | 0 |
| Case 91 | 18 | 87,505      | 15,375,878  | 1 | 1 | 2 | 0 |
| Case 91 | 18 | 18,520,354  | 78,015,180  | 1 | 1 | 2 | 0 |
| Case 91 | 19 | 260,912     | 24,629,285  | 1 | 1 | 2 | 0 |
| Case 91 | 19 | 27,732,159  | 59,097,160  | 1 | 1 | 2 | 0 |
| Case 91 | 20 | 63,244      | 26,293,985  | 1 | 1 | 2 | 0 |
| Case 91 | 20 | 29,425,357  | 62,948,788  | 1 | 1 | 2 | 0 |
| Case 91 | 21 | 10,827,533  | 10,971,337  | 2 | 0 | 2 | 1 |
| Case 91 | 21 | 14,368,320  | 48,100,155  | 2 | 0 | 2 | 1 |
| Case 91 | 22 | 16,114,244  | 51,195,728  | 1 | 1 | 2 | 0 |
| Case 91 | X  | 2,700,157   | 58,488,110  | 1 | 0 | 1 | 0 |
| Case 91 | X  | 61,694,576  | 154,898,561 | 1 | 0 | 1 | 0 |
| Case 92 | 1  | 82,154      | 5,983,114   | 1 | 1 | 2 | 0 |
| Case 92 | 1  | 5,993,223   | 10,651,460  | 2 | 1 | 3 | 0 |
| Case 92 | 1  | 10,653,628  | 12,961,019  | 1 | 1 | 2 | 0 |
| Case 92 | 1  | 13,176,463  | 13,923,574  | 2 | 1 | 3 | 0 |
| Case 92 | 1  | 13,933,727  | 18,026,435  | 1 | 1 | 2 | 0 |
| Case 92 | 1  | 18,031,533  | 18,379,766  | 2 | 1 | 3 | 0 |
| Case 92 | 1  | 18,391,974  | 117,866,924 | 1 | 1 | 2 | 0 |
| Case 92 | 1  | 117,867,339 | 121,346,616 | 2 | 1 | 3 | 0 |
| Case 92 | 1  | 142,649,718 | 182,372,452 | 2 | 1 | 3 | 0 |
| Case 92 | 1  | 182,376,260 | 249,218,992 | 1 | 1 | 2 | 0 |
| Case 92 | 2  | 18,674      | 92,081,640  | 1 | 1 | 2 | 0 |
| Case 92 | 2  | 95,429,424  | 112,211,072 | 1 | 1 | 2 | 0 |
| Case 92 | 2  | 112,220,359 | 113,251,800 | 2 | 1 | 3 | 0 |
| Case 92 | 2  | 113,251,880 | 171,461,132 | 1 | 1 | 2 | 0 |
| Case 92 | 2  | 171,461,637 | 172,921,454 | 2 | 1 | 3 | 0 |
| Case 92 | 2  | 172,921,832 | 201,485,649 | 1 | 1 | 2 | 0 |
| Case 92 | 2  | 201,485,830 | 202,068,483 | 2 | 1 | 3 | 0 |
| Case 92 | 2  | 202,072,897 | 203,203,865 | 1 | 1 | 2 | 0 |
| Case 92 | 2  | 203,204,567 | 204,432,604 | 2 | 1 | 3 | 0 |
| Case 92 | 2  | 204,436,759 | 206,795,827 | 1 | 1 | 2 | 0 |
| Case 92 | 2  | 206,801,824 | 207,285,883 | 2 | 1 | 3 | 0 |
| Case 92 | 2  | 207,287,770 | 227,599,533 | 1 | 1 | 2 | 0 |
| Case 92 | 2  | 227,603,355 | 228,860,349 | 2 | 1 | 3 | 0 |
| Case 92 | 2  | 228,864,662 | 239,176,775 | 1 | 1 | 2 | 0 |
| Case 92 | 2  | 239,177,073 | 239,260,601 | 2 | 1 | 3 | 0 |
| Case 92 | 2  | 239,279,384 | 243,048,760 | 1 | 1 | 2 | 0 |
| Case 92 | 3  | 61,495      | 90,442,925  | 1 | 1 | 2 | 0 |
| Case 92 | 3  | 93,537,290  | 197,838,262 | 1 | 1 | 2 | 0 |
| Case 92 | 4  | 71,566      | 49,620,898  | 1 | 1 | 2 | 0 |
| Case 92 | 4  | 52,697,856  | 190,963,766 | 1 | 1 | 2 | 0 |
| Case 92 | 5  | 38,139      | 36,652,409  | 2 | 1 | 3 | 0 |
| Case 92 | 5  | 36,653,738  | 46,399,093  | 1 | 1 | 2 | 0 |
| Case 92 | 5  | 49,457,282  | 50,392,093  | 1 | 1 | 2 | 0 |
| Case 92 | 5  | 50,392,502  | 52,392,774  | 2 | 1 | 3 | 0 |
| Case 92 | 5  | 52,394,439  | 180,693,127 | 1 | 1 | 2 | 0 |
| Case 92 | 6  | 108,666     | 36,831,569  | 1 | 1 | 2 | 0 |
| Case 92 | 6  | 36,839,598  | 47,946,823  | 2 | 1 | 3 | 0 |
| Case 92 | 6  | 47,949,493  | 51,481,671  | 3 | 1 | 4 | 0 |
| Case 92 | 6  | 51,483,961  | 58,719,796  | 2 | 1 | 3 | 0 |
| Case 92 | 6  | 58,728,413  | 58,752,089  | 1 | 1 | 2 | 0 |
| Case 92 | 6  | 61,891,118  | 170,980,171 | 1 | 1 | 2 | 0 |
| Case 92 | 7  | 44,935      | 22,171,582  | 2 | 1 | 3 | 0 |
| Case 92 | 7  | 22,171,815  | 25,089,059  | 3 | 1 | 4 | 0 |

|         |    |             |             |   |   |   |   |
|---------|----|-------------|-------------|---|---|---|---|
| Case 92 | 7  | 25,089,445  | 39,928,599  | 2 | 1 | 3 | 0 |
| Case 92 | 7  | 39,930,518  | 45,753,418  | 1 | 1 | 2 | 0 |
| Case 92 | 7  | 45,754,582  | 56,394,784  | 2 | 1 | 3 | 0 |
| Case 92 | 7  | 56,437,045  | 58,019,061  | 1 | 1 | 2 | 0 |
| Case 92 | 7  | 61,056,053  | 77,012,042  | 1 | 1 | 2 | 0 |
| Case 92 | 7  | 77,013,594  | 82,630,706  | 2 | 1 | 3 | 0 |
| Case 92 | 7  | 82,638,965  | 83,144,112  | 3 | 1 | 4 | 0 |
| Case 92 | 7  | 83,147,251  | 102,524,110 | 1 | 1 | 2 | 0 |
| Case 92 | 7  | 102,538,515 | 111,986,803 | 2 | 1 | 3 | 0 |
| Case 92 | 7  | 111,999,497 | 112,295,954 | 3 | 1 | 4 | 0 |
| Case 92 | 7  | 112,308,895 | 116,314,868 | 2 | 1 | 3 | 0 |
| Case 92 | 7  | 116,317,877 | 116,770,651 | 3 | 1 | 4 | 0 |
| Case 92 | 7  | 116,774,222 | 117,917,719 | 2 | 1 | 3 | 0 |
| Case 92 | 7  | 117,938,370 | 120,478,935 | 1 | 1 | 2 | 0 |
| Case 92 | 7  | 120,481,818 | 121,668,320 | 2 | 1 | 3 | 0 |
| Case 92 | 7  | 121,671,536 | 159,119,486 | 1 | 1 | 2 | 0 |
| Case 92 | 8  | 164,984     | 43,404,924  | 1 | 1 | 2 | 0 |
| Case 92 | 8  | 43,413,955  | 43,791,691  | 2 | 1 | 3 | 0 |
| Case 92 | 8  | 46,886,735  | 143,374,261 | 2 | 1 | 3 | 0 |
| Case 92 | 8  | 143,376,802 | 146,135,866 | 1 | 1 | 2 | 0 |
| Case 92 | 8  | 146,145,702 | 146,293,414 | 2 | 1 | 3 | 0 |
| Case 92 | 9  | 46,587      | 46,944,322  | 1 | 1 | 2 | 0 |
| Case 92 | 9  | 65,629,772  | 141,066,491 | 1 | 1 | 2 | 0 |
| Case 92 | 10 | 98,087      | 39,097,912  | 1 | 1 | 2 | 0 |
| Case 92 | 10 | 42,436,301  | 54,617,058  | 1 | 1 | 2 | 0 |
| Case 92 | 10 | 54,629,374  | 54,663,747  | 2 | 1 | 3 | 0 |
| Case 92 | 10 | 54,668,597  | 62,179,812  | 1 | 1 | 2 | 0 |
| Case 92 | 10 | 62,181,128  | 76,180,335  | 2 | 1 | 3 | 0 |
| Case 92 | 10 | 76,186,852  | 111,428,184 | 1 | 1 | 2 | 0 |
| Case 92 | 10 | 111,429,236 | 135,477,883 | 2 | 1 | 3 | 0 |
| Case 92 | 11 | 193,146     | 28,058,043  | 2 | 1 | 3 | 0 |
| Case 92 | 11 | 28,070,798  | 51,591,253  | 1 | 1 | 2 | 0 |
| Case 92 | 11 | 54,794,237  | 94,806,722  | 1 | 1 | 2 | 0 |
| Case 92 | 11 | 94,807,261  | 96,024,669  | 2 | 1 | 3 | 0 |
| Case 92 | 11 | 96,029,482  | 109,682,445 | 3 | 1 | 4 | 0 |
| Case 92 | 11 | 109,694,723 | 128,261,411 | 1 | 1 | 2 | 0 |
| Case 92 | 11 | 128,266,104 | 130,775,782 | 2 | 1 | 3 | 0 |
| Case 92 | 11 | 130,776,027 | 134,934,063 | 1 | 1 | 2 | 0 |
| Case 92 | 12 | 191,619     | 34,853,011  | 1 | 1 | 2 | 0 |
| Case 92 | 12 | 37,876,400  | 133,810,935 | 1 | 1 | 2 | 0 |
| Case 92 | 13 | 19,058,717  | 20,000,621  | 2 | 1 | 3 | 0 |
| Case 92 | 13 | 20,000,630  | 25,712,059  | 1 | 1 | 2 | 0 |
| Case 92 | 13 | 25,712,249  | 115,103,529 | 2 | 1 | 3 | 0 |
| Case 92 | 14 | 19,280,733  | 21,345,707  | 1 | 1 | 2 | 0 |
| Case 92 | 14 | 21,348,256  | 21,413,602  | 2 | 1 | 3 | 0 |
| Case 92 | 14 | 21,421,088  | 107,287,663 | 1 | 1 | 2 | 0 |
| Case 92 | 15 | 20,034,919  | 102,461,162 | 1 | 1 | 2 | 0 |
| Case 92 | 16 | 88,165      | 35,285,582  | 1 | 1 | 2 | 0 |
| Case 92 | 16 | 46,450,037  | 50,951,884  | 1 | 1 | 2 | 0 |
| Case 92 | 16 | 50,954,247  | 56,578,118  | 2 | 1 | 3 | 0 |
| Case 92 | 16 | 56,578,292  | 90,274,695  | 1 | 1 | 2 | 0 |
| Case 92 | 17 | 11,885      | 22,242,355  | 1 | 1 | 2 | 0 |
| Case 92 | 17 | 25,268,142  | 26,096,597  | 1 | 1 | 2 | 0 |
| Case 92 | 17 | 26,097,131  | 27,502,029  | 2 | 1 | 3 | 0 |
| Case 92 | 17 | 27,504,921  | 28,104,306  | 1 | 1 | 2 | 0 |
| Case 92 | 17 | 28,120,918  | 32,870,849  | 2 | 1 | 3 | 0 |
| Case 92 | 17 | 32,872,853  | 36,223,325  | 1 | 1 | 2 | 0 |
| Case 92 | 17 | 36,244,358  | 39,420,932  | 2 | 1 | 3 | 0 |
| Case 92 | 17 | 39,433,211  | 40,618,251  | 1 | 1 | 2 | 0 |
| Case 92 | 17 | 40,620,113  | 41,844,689  | 2 | 1 | 3 | 0 |
| Case 92 | 17 | 41,845,235  | 46,126,373  | 1 | 1 | 2 | 0 |

|         |    |             |             |   |   |   |   |
|---------|----|-------------|-------------|---|---|---|---|
| Case 92 | 17 | 46,128,122  | 51,052,711  | 2 | 1 | 3 | 0 |
| Case 92 | 17 | 51,061,423  | 71,113,564  | 1 | 1 | 2 | 0 |
| Case 92 | 17 | 71,115,694  | 72,155,302  | 2 | 1 | 3 | 0 |
| Case 92 | 17 | 72,161,815  | 81,060,040  | 1 | 1 | 2 | 0 |
| Case 92 | 18 | 87,505      | 15,375,878  | 2 | 1 | 3 | 0 |
| Case 92 | 18 | 18,520,354  | 20,570,963  | 2 | 1 | 3 | 0 |
| Case 92 | 18 | 20,572,853  | 78,015,180  | 1 | 1 | 2 | 0 |
| Case 92 | 19 | 260,912     | 24,629,285  | 1 | 1 | 2 | 0 |
| Case 92 | 19 | 27,732,159  | 59,097,160  | 1 | 1 | 2 | 0 |
| Case 92 | 20 | 63,244      | 809,837     | 1 | 1 | 2 | 0 |
| Case 92 | 20 | 810,707     | 1,009,420   | 2 | 1 | 3 | 0 |
| Case 92 | 20 | 1,009,679   | 5,685,929   | 1 | 1 | 2 | 0 |
| Case 92 | 20 | 5,690,278   | 7,990,898   | 2 | 1 | 3 | 0 |
| Case 92 | 20 | 7,998,156   | 8,130,943   | 1 | 1 | 2 | 0 |
| Case 92 | 20 | 8,135,557   | 8,254,666   | 2 | 1 | 3 | 0 |
| Case 92 | 20 | 8,259,959   | 14,431,463  | 1 | 1 | 2 | 0 |
| Case 92 | 20 | 14,434,250  | 16,271,690  | 2 | 1 | 3 | 0 |
| Case 92 | 20 | 16,271,850  | 24,298,816  | 1 | 1 | 2 | 0 |
| Case 92 | 20 | 24,300,771  | 26,293,985  | 2 | 1 | 3 | 0 |
| Case 92 | 20 | 29,425,357  | 29,619,497  | 2 | 1 | 3 | 0 |
| Case 92 | 20 | 29,804,293  | 62,948,788  | 1 | 1 | 2 | 0 |
| Case 92 | 21 | 10,827,533  | 10,971,337  | 1 | 1 | 2 | 0 |
| Case 92 | 21 | 14,368,320  | 21,503,715  | 1 | 1 | 2 | 0 |
| Case 92 | 21 | 21,504,834  | 38,309,678  | 2 | 1 | 3 | 0 |
| Case 92 | 21 | 38,311,993  | 48,100,155  | 1 | 1 | 2 | 0 |
| Case 92 | 22 | 16,114,244  | 32,524,906  | 1 | 1 | 2 | 0 |
| Case 92 | 22 | 32,530,256  | 38,398,267  | 2 | 1 | 3 | 0 |
| Case 92 | 22 | 38,415,721  | 39,947,574  | 3 | 1 | 4 | 0 |
| Case 92 | 22 | 39,950,172  | 40,454,069  | 4 | 1 | 5 | 0 |
| Case 92 | 22 | 40,477,430  | 51,195,728  | 1 | 1 | 2 | 0 |
| Case 92 | X  | 2,700,157   | 58,488,110  | 1 | 1 | 2 | 0 |
| Case 92 | X  | 61,694,576  | 154,898,561 | 1 | 1 | 2 | 0 |
| Case 93 | 1  | 82,154      | 1,275,659   | 3 | 1 | 4 | 0 |
| Case 93 | 1  | 1,275,797   | 2,523,431   | 3 | 0 | 3 | 1 |
| Case 93 | 1  | 2,524,105   | 3,425,238   | 3 | 1 | 4 | 0 |
| Case 93 | 1  | 3,425,722   | 17,889,690  | 3 | 0 | 3 | 1 |
| Case 93 | 1  | 17,892,396  | 18,643,577  | 3 | 1 | 4 | 0 |
| Case 93 | 1  | 18,643,632  | 19,243,446  | 3 | 0 | 3 | 1 |
| Case 93 | 1  | 19,243,589  | 20,304,785  | 3 | 1 | 4 | 0 |
| Case 93 | 1  | 20,304,857  | 21,664,475  | 3 | 0 | 3 | 1 |
| Case 93 | 1  | 21,668,873  | 26,371,691  | 2 | 0 | 2 | 1 |
| Case 93 | 1  | 26,371,788  | 26,586,135  | 2 | 1 | 3 | 0 |
| Case 93 | 1  | 26,586,167  | 27,345,751  | 2 | 0 | 2 | 1 |
| Case 93 | 1  | 27,347,994  | 28,661,383  | 2 | 2 | 4 | 0 |
| Case 93 | 1  | 28,661,422  | 31,961,711  | 2 | 0 | 2 | 1 |
| Case 93 | 1  | 31,972,756  | 32,797,183  | 2 | 1 | 3 | 0 |
| Case 93 | 1  | 32,797,371  | 72,876,346  | 2 | 0 | 2 | 1 |
| Case 93 | 1  | 72,884,712  | 84,165,934  | 3 | 0 | 3 | 1 |
| Case 93 | 1  | 84,168,682  | 87,584,639  | 2 | 2 | 4 | 0 |
| Case 93 | 1  | 87,587,849  | 90,245,167  | 3 | 0 | 3 | 1 |
| Case 93 | 1  | 90,248,302  | 91,339,437  | 2 | 2 | 4 | 0 |
| Case 93 | 1  | 91,352,818  | 92,297,887  | 3 | 0 | 3 | 1 |
| Case 93 | 1  | 92,302,369  | 94,081,407  | 2 | 2 | 4 | 0 |
| Case 93 | 1  | 94,083,372  | 98,883,880  | 3 | 0 | 3 | 1 |
| Case 93 | 1  | 98,893,908  | 99,577,011  | 2 | 0 | 2 | 1 |
| Case 93 | 1  | 99,580,912  | 102,435,169 | 3 | 0 | 3 | 1 |
| Case 93 | 1  | 102,437,203 | 104,716,956 | 2 | 0 | 2 | 1 |
| Case 93 | 1  | 104,725,387 | 106,849,846 | 2 | 2 | 4 | 0 |
| Case 93 | 1  | 106,860,057 | 114,309,873 | 2 | 0 | 2 | 1 |
| Case 93 | 1  | 114,310,957 | 117,049,676 | 2 | 2 | 4 | 0 |
| Case 93 | 1  | 117,053,745 | 118,199,767 | 2 | 0 | 2 | 1 |

|         |   |             |             |    |   |    |   |
|---------|---|-------------|-------------|----|---|----|---|
| Case 93 | 1 | 118,208,245 | 118,355,412 | 3  | 2 | 5  | 0 |
| Case 93 | 1 | 118,369,833 | 121,346,616 | 2  | 2 | 4  | 0 |
| Case 93 | 1 | 142,649,718 | 154,936,312 | 2  | 2 | 4  | 0 |
| Case 93 | 1 | 154,936,389 | 155,226,107 | 2  | 1 | 3  | 0 |
| Case 93 | 1 | 155,226,571 | 155,947,875 | 2  | 2 | 4  | 0 |
| Case 93 | 1 | 155,951,502 | 156,689,481 | 3  | 2 | 5  | 0 |
| Case 93 | 1 | 156,690,967 | 174,126,742 | 2  | 2 | 4  | 0 |
| Case 93 | 1 | 174,128,140 | 174,497,642 | 2  | 1 | 3  | 0 |
| Case 93 | 1 | 174,499,977 | 237,868,623 | 2  | 2 | 4  | 0 |
| Case 93 | 1 | 237,870,447 | 245,766,015 | 2  | 1 | 3  | 0 |
| Case 93 | 1 | 245,766,651 | 245,959,395 | 2  | 0 | 2  | 1 |
| Case 93 | 1 | 245,964,761 | 249,218,992 | 2  | 1 | 3  | 0 |
| Case 93 | 2 | 18,674      | 34,301,138  | 2  | 1 | 3  | 0 |
| Case 93 | 2 | 34,301,669  | 34,319,511  | 1  | 0 | 1  | 0 |
| Case 93 | 2 | 34,319,972  | 57,781,712  | 2  | 1 | 3  | 0 |
| Case 93 | 2 | 57,793,672  | 60,584,819  | 2  | 2 | 4  | 0 |
| Case 93 | 2 | 60,586,661  | 83,273,436  | 2  | 1 | 3  | 0 |
| Case 93 | 2 | 83,276,705  | 92,081,640  | 2  | 2 | 4  | 0 |
| Case 93 | 2 | 95,429,424  | 133,906,887 | 2  | 2 | 4  | 0 |
| Case 93 | 2 | 133,919,427 | 149,919,348 | 2  | 0 | 2  | 1 |
| Case 93 | 2 | 149,919,888 | 237,848,643 | 2  | 2 | 4  | 0 |
| Case 93 | 2 | 237,851,338 | 243,048,760 | 2  | 1 | 3  | 0 |
| Case 93 | 3 | 61,495      | 2,394,139   | 1  | 1 | 2  | 0 |
| Case 93 | 3 | 2,399,760   | 4,313,485   | 2  | 1 | 3  | 0 |
| Case 93 | 3 | 4,317,445   | 4,461,782   | 1  | 0 | 1  | 0 |
| Case 93 | 3 | 4,462,774   | 16,578,457  | 2  | 1 | 3  | 0 |
| Case 93 | 3 | 16,585,132  | 16,656,331  | 1  | 0 | 1  | 0 |
| Case 93 | 3 | 16,662,488  | 34,451,940  | 2  | 1 | 3  | 0 |
| Case 93 | 3 | 34,465,049  | 34,569,954  | 4  | 2 | 6  | 0 |
| Case 93 | 3 | 34,580,559  | 35,987,406  | 1  | 1 | 2  | 0 |
| Case 93 | 3 | 35,987,444  | 36,148,330  | 1  | 0 | 1  | 0 |
| Case 93 | 3 | 36,148,866  | 39,228,941  | 2  | 0 | 2  | 1 |
| Case 93 | 3 | 39,228,953  | 57,011,234  | 2  | 1 | 3  | 0 |
| Case 93 | 3 | 57,014,104  | 58,320,984  | 2  | 0 | 2  | 1 |
| Case 93 | 3 | 58,331,186  | 60,236,847  | 2  | 1 | 3  | 0 |
| Case 93 | 3 | 60,237,710  | 60,853,686  | 1  | 0 | 1  | 0 |
| Case 93 | 3 | 60,857,053  | 68,755,582  | 2  | 1 | 3  | 0 |
| Case 93 | 3 | 68,764,017  | 70,889,227  | 1  | 0 | 1  | 0 |
| Case 93 | 3 | 70,900,385  | 80,669,984  | 1  | 1 | 2  | 0 |
| Case 93 | 3 | 80,687,359  | 90,442,925  | 2  | 1 | 3  | 0 |
| Case 93 | 3 | 93,537,290  | 118,257,029 | 2  | 1 | 3  | 0 |
| Case 93 | 3 | 118,263,121 | 118,891,246 | 4  | 1 | 5  | 0 |
| Case 93 | 3 | 118,901,013 | 126,137,618 | 2  | 1 | 3  | 0 |
| Case 93 | 3 | 126,137,966 | 126,272,252 | 4  | 1 | 5  | 0 |
| Case 93 | 3 | 126,276,710 | 127,334,730 | 5  | 1 | 6  | 0 |
| Case 93 | 3 | 127,334,777 | 134,624,858 | 4  | 1 | 5  | 0 |
| Case 93 | 3 | 134,625,255 | 136,097,576 | 7  | 0 | 7  | 1 |
| Case 93 | 3 | 136,111,917 | 138,076,206 | 11 | 0 | 11 | 1 |
| Case 93 | 3 | 138,078,198 | 139,035,269 | 10 | 0 | 10 | 1 |
| Case 93 | 3 | 139,040,591 | 141,568,628 | 8  | 0 | 8  | 1 |
| Case 93 | 3 | 141,569,773 | 142,796,422 | 11 | 0 | 11 | 1 |
| Case 93 | 3 | 142,800,051 | 146,687,502 | 4  | 1 | 5  | 0 |
| Case 93 | 3 | 146,690,215 | 147,076,791 | 9  | 1 | 10 | 0 |
| Case 93 | 3 | 147,081,271 | 147,237,920 | 7  | 0 | 7  | 1 |
| Case 93 | 3 | 147,246,362 | 148,993,079 | 8  | 0 | 8  | 1 |
| Case 93 | 3 | 148,993,158 | 151,176,451 | 10 | 0 | 10 | 1 |
| Case 93 | 3 | 151,184,862 | 152,345,234 | 12 | 0 | 12 | 1 |
| Case 93 | 3 | 152,347,482 | 152,679,420 | 10 | 0 | 10 | 1 |
| Case 93 | 3 | 152,687,097 | 168,811,043 | 1  | 1 | 2  | 0 |
| Case 93 | 3 | 168,812,865 | 168,967,606 | 8  | 5 | 13 | 0 |
| Case 93 | 3 | 168,972,802 | 169,947,906 | 2  | 1 | 3  | 0 |

|         |   |             |             |   |   |    |   |
|---------|---|-------------|-------------|---|---|----|---|
| Case 93 | 3 | 169,958,552 | 170,079,132 | 9 | 6 | 15 | 0 |
| Case 93 | 3 | 170,091,902 | 187,629,577 | 2 | 1 | 3  | 0 |
| Case 93 | 3 | 187,630,727 | 188,173,145 | 2 | 0 | 2  | 1 |
| Case 93 | 3 | 188,181,560 | 197,838,262 | 2 | 1 | 3  | 0 |
| Case 93 | 4 | 71,566      | 15,713,513  | 2 | 0 | 2  | 1 |
| Case 93 | 4 | 15,716,923  | 41,850,006  | 2 | 2 | 4  | 0 |
| Case 93 | 4 | 41,855,573  | 49,620,898  | 2 | 1 | 3  | 0 |
| Case 93 | 4 | 52,697,856  | 90,137,336  | 2 | 1 | 3  | 0 |
| Case 93 | 4 | 90,137,884  | 91,748,644  | 3 | 1 | 4  | 0 |
| Case 93 | 4 | 91,762,984  | 92,381,094  | 3 | 0 | 3  | 1 |
| Case 93 | 4 | 92,399,884  | 136,131,907 | 3 | 1 | 4  | 0 |
| Case 93 | 4 | 136,147,584 | 149,209,008 | 5 | 1 | 6  | 0 |
| Case 93 | 4 | 149,210,677 | 159,688,477 | 4 | 1 | 5  | 0 |
| Case 93 | 4 | 159,729,794 | 162,680,619 | 3 | 1 | 4  | 0 |
| Case 93 | 4 | 162,680,682 | 167,179,581 | 3 | 0 | 3  | 1 |
| Case 93 | 4 | 167,185,391 | 180,173,268 | 2 | 0 | 2  | 1 |
| Case 93 | 4 | 180,173,785 | 185,788,486 | 2 | 1 | 3  | 0 |
| Case 93 | 4 | 185,788,762 | 186,111,306 | 3 | 1 | 4  | 0 |
| Case 93 | 4 | 186,111,347 | 190,963,766 | 2 | 1 | 3  | 0 |
| Case 93 | 5 | 38,139      | 46,162,561  | 2 | 2 | 4  | 0 |
| Case 93 | 5 | 46,174,864  | 46,399,093  | 1 | 1 | 2  | 0 |
| Case 93 | 5 | 49,457,282  | 49,492,838  | 1 | 1 | 2  | 0 |
| Case 93 | 5 | 49,522,346  | 68,003,457  | 2 | 2 | 4  | 0 |
| Case 93 | 5 | 68,003,493  | 71,290,379  | 2 | 0 | 2  | 1 |
| Case 93 | 5 | 71,295,157  | 98,779,530  | 2 | 1 | 3  | 0 |
| Case 93 | 5 | 98,781,103  | 100,914,502 | 2 | 0 | 2  | 1 |
| Case 93 | 5 | 100,918,526 | 101,585,209 | 0 | 0 | 0  | 0 |
| Case 93 | 5 | 101,587,931 | 102,353,284 | 2 | 0 | 2  | 1 |
| Case 93 | 5 | 102,364,597 | 121,740,909 | 2 | 1 | 3  | 0 |
| Case 93 | 5 | 121,750,329 | 128,596,232 | 2 | 0 | 2  | 1 |
| Case 93 | 5 | 128,607,170 | 178,864,168 | 2 | 1 | 3  | 0 |
| Case 93 | 5 | 178,886,655 | 178,901,458 | 1 | 1 | 2  | 0 |
| Case 93 | 5 | 178,903,149 | 180,693,127 | 2 | 1 | 3  | 0 |
| Case 93 | 6 | 108,666     | 58,752,089  | 2 | 1 | 3  | 0 |
| Case 93 | 6 | 61,891,118  | 67,860,579  | 2 | 1 | 3  | 0 |
| Case 93 | 6 | 67,866,601  | 115,311,251 | 2 | 2 | 4  | 0 |
| Case 93 | 6 | 115,313,523 | 125,587,961 | 2 | 1 | 3  | 0 |
| Case 93 | 6 | 125,596,957 | 138,418,015 | 2 | 2 | 4  | 0 |
| Case 93 | 6 | 138,419,207 | 138,444,360 | 1 | 1 | 2  | 0 |
| Case 93 | 6 | 138,444,930 | 147,525,663 | 2 | 2 | 4  | 0 |
| Case 93 | 6 | 147,535,305 | 156,496,460 | 2 | 1 | 3  | 0 |
| Case 93 | 6 | 156,502,670 | 170,980,171 | 2 | 2 | 4  | 0 |
| Case 93 | 7 | 44,935      | 1,842,407   | 3 | 0 | 3  | 1 |
| Case 93 | 7 | 1,843,966   | 3,515,437   | 2 | 1 | 3  | 0 |
| Case 93 | 7 | 3,521,000   | 18,200,205  | 3 | 1 | 4  | 0 |
| Case 93 | 7 | 18,215,216  | 18,301,455  | 1 | 0 | 1  | 0 |
| Case 93 | 7 | 18,310,791  | 20,180,780  | 3 | 1 | 4  | 0 |
| Case 93 | 7 | 20,182,020  | 20,985,300  | 2 | 1 | 3  | 0 |
| Case 93 | 7 | 20,990,451  | 25,316,325  | 3 | 1 | 4  | 0 |
| Case 93 | 7 | 25,316,682  | 25,908,210  | 2 | 1 | 3  | 0 |
| Case 93 | 7 | 25,909,208  | 28,189,946  | 3 | 1 | 4  | 0 |
| Case 93 | 7 | 28,190,121  | 29,111,388  | 2 | 1 | 3  | 0 |
| Case 93 | 7 | 29,111,578  | 54,412,608  | 3 | 1 | 4  | 0 |
| Case 93 | 7 | 54,419,111  | 55,459,501  | 5 | 2 | 7  | 0 |
| Case 93 | 7 | 55,459,563  | 58,019,061  | 3 | 0 | 3  | 1 |
| Case 93 | 7 | 61,056,053  | 66,962,936  | 3 | 0 | 3  | 1 |
| Case 93 | 7 | 66,965,868  | 80,654,259  | 3 | 1 | 4  | 0 |
| Case 93 | 7 | 80,660,357  | 86,554,972  | 5 | 1 | 6  | 0 |
| Case 93 | 7 | 86,567,364  | 88,100,188  | 5 | 3 | 8  | 0 |
| Case 93 | 7 | 88,102,745  | 88,904,777  | 5 | 4 | 9  | 0 |
| Case 93 | 7 | 88,919,393  | 94,359,748  | 5 | 1 | 6  | 0 |

|         |    |             |             |    |   |    |   |
|---------|----|-------------|-------------|----|---|----|---|
| Case 93 | 7  | 94,364,780  | 96,294,270  | 6  | 1 | 7  | 0 |
| Case 93 | 7  | 96,309,021  | 97,602,656  | 10 | 0 | 10 | 1 |
| Case 93 | 7  | 97,611,196  | 99,659,902  | 8  | 0 | 8  | 1 |
| Case 93 | 7  | 99,659,903  | 99,801,677  | 7  | 0 | 7  | 1 |
| Case 93 | 7  | 99,802,346  | 101,428,464 | 6  | 0 | 6  | 1 |
| Case 93 | 7  | 101,429,264 | 103,062,016 | 10 | 0 | 10 | 1 |
| Case 93 | 7  | 103,062,387 | 103,243,894 | 11 | 0 | 11 | 1 |
| Case 93 | 7  | 103,251,161 | 103,870,718 | 15 | 0 | 15 | 1 |
| Case 93 | 7  | 103,871,529 | 104,359,226 | 13 | 0 | 13 | 1 |
| Case 93 | 7  | 104,362,704 | 109,251,487 | 2  | 1 | 3  | 0 |
| Case 93 | 7  | 109,252,043 | 109,477,177 | 3  | 2 | 5  | 0 |
| Case 93 | 7  | 109,484,997 | 110,208,243 | 2  | 2 | 4  | 0 |
| Case 93 | 7  | 110,227,761 | 110,489,975 | 3  | 2 | 5  | 0 |
| Case 93 | 7  | 110,494,399 | 151,396,253 | 2  | 2 | 4  | 0 |
| Case 93 | 7  | 151,397,343 | 151,423,345 | 2  | 1 | 3  | 0 |
| Case 93 | 7  | 151,425,449 | 152,285,741 | 2  | 2 | 4  | 0 |
| Case 93 | 7  | 152,292,180 | 152,430,770 | 2  | 1 | 3  | 0 |
| Case 93 | 7  | 152,431,642 | 155,124,428 | 2  | 2 | 4  | 0 |
| Case 93 | 7  | 155,134,684 | 155,162,399 | 1  | 1 | 2  | 0 |
| Case 93 | 7  | 155,164,799 | 159,119,486 | 2  | 2 | 4  | 0 |
| Case 93 | 8  | 164,984     | 43,413,955  | 2  | 2 | 4  | 0 |
| Case 93 | 8  | 43,414,155  | 43,791,691  | 2  | 1 | 3  | 0 |
| Case 93 | 8  | 46,886,735  | 47,732,328  | 2  | 1 | 3  | 0 |
| Case 93 | 8  | 47,739,851  | 89,272,062  | 2  | 2 | 4  | 0 |
| Case 93 | 8  | 89,273,678  | 90,283,685  | 2  | 0 | 2  | 1 |
| Case 93 | 8  | 90,289,326  | 90,520,649  | 1  | 0 | 1  | 0 |
| Case 93 | 8  | 90,528,845  | 90,736,846  | 2  | 0 | 2  | 1 |
| Case 93 | 8  | 90,737,258  | 142,084,221 | 2  | 2 | 4  | 0 |
| Case 93 | 8  | 142,091,853 | 146,293,414 | 2  | 1 | 3  | 0 |
| Case 93 | 9  | 46,587      | 17,509,083  | 1  | 0 | 1  | 0 |
| Case 93 | 9  | 17,511,064  | 21,403,636  | 3  | 0 | 3  | 1 |
| Case 93 | 9  | 21,405,363  | 22,711,948  | 0  | 0 | 0  | 0 |
| Case 93 | 9  | 22,724,188  | 24,754,015  | 3  | 0 | 3  | 1 |
| Case 93 | 9  | 24,756,027  | 31,955,694  | 1  | 0 | 1  | 0 |
| Case 93 | 9  | 31,970,850  | 46,944,322  | 2  | 0 | 2  | 1 |
| Case 93 | 9  | 65,629,772  | 84,164,493  | 2  | 0 | 2  | 1 |
| Case 93 | 9  | 84,165,251  | 84,521,381  | 1  | 0 | 1  | 0 |
| Case 93 | 9  | 84,528,161  | 141,066,491 | 2  | 0 | 2  | 1 |
| Case 93 | 10 | 98,087      | 2,143,308   | 2  | 1 | 3  | 0 |
| Case 93 | 10 | 2,148,077   | 18,790,858  | 2  | 0 | 2  | 1 |
| Case 93 | 10 | 18,794,073  | 39,097,912  | 2  | 1 | 3  | 0 |
| Case 93 | 10 | 42,436,301  | 73,699,145  | 2  | 1 | 3  | 0 |
| Case 93 | 10 | 73,707,100  | 74,057,844  | 2  | 0 | 2  | 1 |
| Case 93 | 10 | 74,083,427  | 96,541,616  | 2  | 1 | 3  | 0 |
| Case 93 | 10 | 96,541,982  | 96,575,782  | 1  | 1 | 2  | 0 |
| Case 93 | 10 | 96,576,190  | 135,477,883 | 2  | 1 | 3  | 0 |
| Case 93 | 11 | 193,146     | 49,170,774  | 2  | 1 | 3  | 0 |
| Case 93 | 11 | 49,176,227  | 51,591,253  | 2  | 0 | 2  | 1 |
| Case 93 | 11 | 54,794,237  | 55,431,897  | 2  | 0 | 2  | 1 |
| Case 93 | 11 | 55,432,646  | 59,764,628  | 2  | 1 | 3  | 0 |
| Case 93 | 11 | 59,767,000  | 59,829,992  | 3  | 1 | 4  | 0 |
| Case 93 | 11 | 59,830,015  | 134,934,063 | 2  | 1 | 3  | 0 |
| Case 93 | 12 | 191,619     | 34,781,188  | 2  | 2 | 4  | 0 |
| Case 93 | 12 | 34,801,271  | 34,853,011  | 2  | 1 | 3  | 0 |
| Case 93 | 12 | 37,876,400  | 38,541,366  | 2  | 1 | 3  | 0 |
| Case 93 | 12 | 38,547,954  | 41,700,764  | 2  | 2 | 4  | 0 |
| Case 93 | 12 | 41,703,049  | 101,892,921 | 2  | 1 | 3  | 0 |
| Case 93 | 12 | 101,893,315 | 124,520,331 | 2  | 2 | 4  | 0 |
| Case 93 | 12 | 124,525,443 | 124,843,999 | 2  | 1 | 3  | 0 |
| Case 93 | 12 | 124,844,581 | 131,167,181 | 2  | 2 | 4  | 0 |
| Case 93 | 12 | 131,167,812 | 133,810,935 | 2  | 1 | 3  | 0 |

|         |    |             |             |   |   |   |   |
|---------|----|-------------|-------------|---|---|---|---|
| Case 93 | 13 | 19,058,717  | 28,912,726  | 2 | 0 | 2 | 1 |
| Case 93 | 13 | 28,916,343  | 28,959,115  | 3 | 1 | 4 | 0 |
| Case 93 | 13 | 28,962,686  | 29,183,420  | 3 | 0 | 3 | 1 |
| Case 93 | 13 | 29,186,482  | 31,692,454  | 2 | 2 | 4 | 0 |
| Case 93 | 13 | 31,693,877  | 36,625,089  | 3 | 2 | 5 | 0 |
| Case 93 | 13 | 36,637,010  | 46,455,864  | 2 | 2 | 4 | 0 |
| Case 93 | 13 | 46,458,021  | 56,137,423  | 3 | 2 | 5 | 0 |
| Case 93 | 13 | 56,146,159  | 56,306,848  | 3 | 0 | 3 | 1 |
| Case 93 | 13 | 56,311,909  | 56,593,465  | 3 | 1 | 4 | 0 |
| Case 93 | 13 | 56,609,136  | 58,040,459  | 3 | 0 | 3 | 1 |
| Case 93 | 13 | 58,063,367  | 58,158,553  | 3 | 1 | 4 | 0 |
| Case 93 | 13 | 58,163,183  | 78,562,487  | 3 | 0 | 3 | 1 |
| Case 93 | 13 | 78,567,577  | 78,700,474  | 3 | 1 | 4 | 0 |
| Case 93 | 13 | 78,701,023  | 99,401,848  | 3 | 0 | 3 | 1 |
| Case 93 | 13 | 99,403,611  | 99,436,483  | 4 | 0 | 4 | 1 |
| Case 93 | 13 | 99,438,618  | 115,103,529 | 3 | 0 | 3 | 1 |
| Case 93 | 14 | 19,280,733  | 22,609,120  | 4 | 0 | 4 | 1 |
| Case 93 | 14 | 22,609,387  | 22,977,222  | 5 | 0 | 5 | 1 |
| Case 93 | 14 | 22,978,335  | 104,952,338 | 4 | 0 | 4 | 1 |
| Case 93 | 14 | 104,966,414 | 107,287,663 | 3 | 0 | 3 | 1 |
| Case 93 | 15 | 20,034,919  | 20,612,840  | 2 | 0 | 2 | 1 |
| Case 93 | 15 | 21,903,815  | 83,337,059  | 2 | 1 | 3 | 0 |
| Case 93 | 15 | 83,342,772  | 87,685,685  | 2 | 0 | 2 | 1 |
| Case 93 | 15 | 87,688,475  | 102,461,162 | 2 | 1 | 3 | 0 |
| Case 93 | 16 | 88,165      | 1,849,916   | 2 | 1 | 3 | 0 |
| Case 93 | 16 | 1,850,446   | 35,285,582  | 2 | 2 | 4 | 0 |
| Case 93 | 16 | 46,450,037  | 51,562,530  | 2 | 2 | 4 | 0 |
| Case 93 | 16 | 51,565,812  | 78,551,953  | 4 | 0 | 4 | 1 |
| Case 93 | 16 | 78,552,496  | 78,581,206  | 2 | 0 | 2 | 1 |
| Case 93 | 16 | 78,584,616  | 82,595,267  | 4 | 0 | 4 | 1 |
| Case 93 | 16 | 82,602,736  | 83,711,918  | 5 | 0 | 5 | 1 |
| Case 93 | 16 | 83,712,011  | 90,274,695  | 4 | 0 | 4 | 1 |
| Case 93 | 17 | 11,885      | 22,242,355  | 3 | 0 | 3 | 1 |
| Case 93 | 17 | 25,268,142  | 34,436,708  | 3 | 0 | 3 | 1 |
| Case 93 | 17 | 34,443,811  | 34,461,454  | 5 | 0 | 5 | 1 |
| Case 93 | 17 | 34,461,489  | 81,060,040  | 3 | 0 | 3 | 1 |
| Case 93 | 18 | 87,505      | 15,375,878  | 2 | 1 | 3 | 0 |
| Case 93 | 18 | 18,520,354  | 26,075,587  | 2 | 1 | 3 | 0 |
| Case 93 | 18 | 26,085,085  | 71,459,511  | 2 | 0 | 2 | 1 |
| Case 93 | 18 | 71,460,438  | 78,015,180  | 2 | 1 | 3 | 0 |
| Case 93 | 19 | 260,912     | 20,163,633  | 2 | 0 | 2 | 1 |
| Case 93 | 19 | 20,170,214  | 20,470,564  | 1 | 0 | 1 | 0 |
| Case 93 | 19 | 20,473,553  | 24,629,285  | 2 | 0 | 2 | 1 |
| Case 93 | 19 | 27,732,159  | 27,828,664  | 2 | 0 | 2 | 1 |
| Case 93 | 19 | 27,862,694  | 34,609,682  | 3 | 2 | 5 | 0 |
| Case 93 | 19 | 34,610,124  | 41,600,877  | 3 | 1 | 4 | 0 |
| Case 93 | 19 | 41,601,609  | 41,617,293  | 4 | 2 | 6 | 0 |
| Case 93 | 19 | 41,619,575  | 47,031,583  | 3 | 1 | 4 | 0 |
| Case 93 | 19 | 47,032,145  | 47,090,085  | 4 | 2 | 6 | 0 |
| Case 93 | 19 | 47,103,428  | 59,097,160  | 3 | 1 | 4 | 0 |
| Case 93 | 20 | 63,244      | 14,675,433  | 4 | 1 | 5 | 0 |
| Case 93 | 20 | 14,678,135  | 15,237,052  | 2 | 1 | 3 | 0 |
| Case 93 | 20 | 15,241,763  | 16,783,688  | 4 | 1 | 5 | 0 |
| Case 93 | 20 | 16,785,997  | 18,833,210  | 1 | 0 | 1 | 0 |
| Case 93 | 20 | 18,835,278  | 22,974,778  | 4 | 1 | 5 | 0 |
| Case 93 | 20 | 22,975,660  | 26,293,985  | 3 | 2 | 5 | 0 |
| Case 93 | 20 | 29,425,357  | 50,426,860  | 3 | 2 | 5 | 0 |
| Case 93 | 20 | 50,437,573  | 54,632,564  | 4 | 2 | 6 | 0 |
| Case 93 | 20 | 54,635,482  | 62,948,788  | 3 | 2 | 5 | 0 |
| Case 93 | 21 | 10,827,533  | 10,971,337  | 2 | 1 | 3 | 0 |
| Case 93 | 21 | 14,368,320  | 48,100,155  | 2 | 1 | 3 | 0 |

|         |    |             |             |   |   |   |   |
|---------|----|-------------|-------------|---|---|---|---|
| Case 93 | 22 | 16,114,244  | 30,612,949  | 2 | 1 | 3 | 0 |
| Case 93 | 22 | 30,614,437  | 31,521,850  | 2 | 0 | 2 | 1 |
| Case 93 | 22 | 31,522,450  | 51,195,728  | 2 | 1 | 3 | 0 |
| Case 93 | X  | 2,700,157   | 58,488,110  | 3 | 0 | 3 | 1 |
| Case 93 | X  | 61,694,576  | 70,824,523  | 3 | 0 | 3 | 1 |
| Case 93 | X  | 70,828,953  | 146,741,716 | 1 | 0 | 1 | 0 |
| Case 93 | X  | 146,751,765 | 147,236,718 | 0 | 0 | 0 | 0 |
| Case 93 | X  | 147,242,851 | 154,898,561 | 1 | 0 | 1 | 0 |
| Case 94 | 1  | 82,154      | 11,952,406  | 4 | 1 | 5 | 0 |
| Case 94 | 1  | 11,957,639  | 25,178,310  | 2 | 1 | 3 | 0 |
| Case 94 | 1  | 25,185,786  | 25,314,894  | 3 | 1 | 4 | 0 |
| Case 94 | 1  | 25,319,751  | 121,346,616 | 2 | 1 | 3 | 0 |
| Case 94 | 1  | 142,649,718 | 185,240,474 | 2 | 2 | 4 | 0 |
| Case 94 | 1  | 185,253,790 | 192,681,078 | 2 | 1 | 3 | 0 |
| Case 94 | 1  | 192,682,671 | 214,839,175 | 2 | 2 | 4 | 0 |
| Case 94 | 1  | 214,842,590 | 221,442,575 | 3 | 2 | 5 | 0 |
| Case 94 | 1  | 221,443,609 | 227,796,748 | 2 | 2 | 4 | 0 |
| Case 94 | 1  | 227,798,565 | 228,881,129 | 2 | 1 | 3 | 0 |
| Case 94 | 1  | 228,884,405 | 245,434,303 | 2 | 2 | 4 | 0 |
| Case 94 | 1  | 245,441,251 | 246,793,880 | 2 | 1 | 3 | 0 |
| Case 94 | 1  | 246,797,823 | 249,218,992 | 2 | 2 | 4 | 0 |
| Case 94 | 2  | 18,674      | 7,407,863   | 2 | 0 | 2 | 1 |
| Case 94 | 2  | 7,415,677   | 7,554,772   | 1 | 0 | 1 | 0 |
| Case 94 | 2  | 7,560,605   | 7,862,742   | 2 | 0 | 2 | 1 |
| Case 94 | 2  | 7,864,401   | 42,114,002  | 3 | 0 | 3 | 1 |
| Case 94 | 2  | 42,117,362  | 42,131,523  | 4 | 1 | 5 | 0 |
| Case 94 | 2  | 42,133,049  | 83,422,531  | 3 | 0 | 3 | 1 |
| Case 94 | 2  | 83,424,531  | 85,638,323  | 2 | 0 | 2 | 1 |
| Case 94 | 2  | 85,640,098  | 85,866,329  | 2 | 1 | 3 | 0 |
| Case 94 | 2  | 85,868,133  | 87,628,556  | 2 | 0 | 2 | 1 |
| Case 94 | 2  | 87,768,679  | 92,081,640  | 2 | 2 | 4 | 0 |
| Case 94 | 2  | 95,429,424  | 169,814,626 | 2 | 2 | 4 | 0 |
| Case 94 | 2  | 169,814,655 | 170,132,243 | 2 | 1 | 3 | 0 |
| Case 94 | 2  | 170,133,086 | 237,214,545 | 2 | 2 | 4 | 0 |
| Case 94 | 2  | 237,220,431 | 238,178,706 | 2 | 0 | 2 | 1 |
| Case 94 | 2  | 238,189,278 | 243,048,760 | 2 | 1 | 3 | 0 |
| Case 94 | 3  | 61,495      | 60,148,685  | 2 | 1 | 3 | 0 |
| Case 94 | 3  | 60,149,936  | 60,664,643  | 1 | 0 | 1 | 0 |
| Case 94 | 3  | 60,681,361  | 60,898,109  | 2 | 0 | 2 | 1 |
| Case 94 | 3  | 60,898,271  | 85,591,467  | 2 | 1 | 3 | 0 |
| Case 94 | 3  | 85,594,695  | 90,442,925  | 3 | 1 | 4 | 0 |
| Case 94 | 3  | 93,537,290  | 163,917,329 | 3 | 1 | 4 | 0 |
| Case 94 | 3  | 163,917,341 | 163,983,338 | 2 | 0 | 2 | 1 |
| Case 94 | 3  | 163,994,508 | 197,838,262 | 3 | 1 | 4 | 0 |
| Case 94 | 4  | 71,566      | 49,620,898  | 2 | 1 | 3 | 0 |
| Case 94 | 4  | 52,697,856  | 162,511,370 | 2 | 1 | 3 | 0 |
| Case 94 | 4  | 162,514,902 | 168,292,322 | 2 | 0 | 2 | 1 |
| Case 94 | 4  | 168,292,438 | 169,292,905 | 1 | 0 | 1 | 0 |
| Case 94 | 4  | 169,293,182 | 173,637,709 | 2 | 0 | 2 | 1 |
| Case 94 | 4  | 173,643,640 | 190,963,766 | 1 | 0 | 1 | 0 |
| Case 94 | 5  | 38,139      | 1,922,870   | 3 | 0 | 3 | 1 |
| Case 94 | 5  | 1,927,293   | 23,594,090  | 4 | 0 | 4 | 1 |
| Case 94 | 5  | 23,596,252  | 23,621,475  | 2 | 0 | 2 | 1 |
| Case 94 | 5  | 23,622,036  | 26,207,219  | 4 | 0 | 4 | 1 |
| Case 94 | 5  | 26,210,563  | 26,456,504  | 3 | 0 | 3 | 1 |
| Case 94 | 5  | 26,482,424  | 46,251,306  | 4 | 0 | 4 | 1 |
| Case 94 | 5  | 46,252,282  | 46,399,093  | 2 | 0 | 2 | 1 |
| Case 94 | 5  | 49,457,282  | 103,659,607 | 2 | 0 | 2 | 1 |
| Case 94 | 5  | 103,669,502 | 104,533,433 | 1 | 0 | 1 | 0 |
| Case 94 | 5  | 104,540,026 | 116,329,875 | 2 | 0 | 2 | 1 |
| Case 94 | 5  | 116,355,602 | 131,075,921 | 1 | 0 | 1 | 0 |



|         |    |             |             |    |   |    |   |
|---------|----|-------------|-------------|----|---|----|---|
| Case 94 | 5  | 131,107,692 | 135,764,923 | 2  | 0 | 2  | 1 |
| Case 94 | 5  | 135,772,456 | 174,632,301 | 3  | 0 | 3  | 1 |
| Case 94 | 5  | 174,636,577 | 175,433,876 | 2  | 0 | 2  | 1 |
| Case 94 | 5  | 175,571,579 | 180,693,127 | 3  | 0 | 3  | 1 |
| Case 94 | 6  | 108,666     | 58,752,089  | 4  | 0 | 4  | 1 |
| Case 94 | 6  | 61,891,118  | 61,961,519  | 4  | 0 | 4  | 1 |
| Case 94 | 6  | 61,963,172  | 69,214,502  | 3  | 0 | 3  | 1 |
| Case 94 | 6  | 69,235,100  | 69,285,887  | 2  | 0 | 2  | 1 |
| Case 94 | 6  | 69,287,242  | 92,822,870  | 3  | 0 | 3  | 1 |
| Case 94 | 6  | 92,823,967  | 93,005,995  | 2  | 0 | 2  | 1 |
| Case 94 | 6  | 93,013,237  | 147,767,235 | 3  | 0 | 3  | 1 |
| Case 94 | 6  | 147,780,366 | 147,902,467 | 4  | 0 | 4  | 1 |
| Case 94 | 6  | 147,908,995 | 148,007,144 | 2  | 0 | 2  | 1 |
| Case 94 | 6  | 148,015,300 | 162,809,009 | 3  | 0 | 3  | 1 |
| Case 94 | 6  | 162,811,902 | 162,875,706 | 2  | 0 | 2  | 1 |
| Case 94 | 6  | 162,876,205 | 165,381,837 | 3  | 0 | 3  | 1 |
| Case 94 | 6  | 165,394,580 | 165,560,336 | 2  | 0 | 2  | 1 |
| Case 94 | 6  | 165,564,573 | 165,664,853 | 4  | 0 | 4  | 1 |
| Case 94 | 6  | 165,665,299 | 170,980,171 | 3  | 0 | 3  | 1 |
| Case 94 | 7  | 44,935      | 54,313,171  | 2  | 0 | 2  | 1 |
| Case 94 | 7  | 54,316,072  | 56,550,963  | 2  | 1 | 3  | 0 |
| Case 94 | 7  | 56,558,099  | 58,019,061  | 2  | 0 | 2  | 1 |
| Case 94 | 7  | 61,056,053  | 62,397,642  | 2  | 0 | 2  | 1 |
| Case 94 | 7  | 62,413,547  | 99,696,962  | 3  | 1 | 4  | 0 |
| Case 94 | 7  | 99,696,978  | 102,470,275 | 2  | 1 | 3  | 0 |
| Case 94 | 7  | 102,471,345 | 106,545,228 | 3  | 1 | 4  | 0 |
| Case 94 | 7  | 106,545,563 | 110,329,655 | 2  | 1 | 3  | 0 |
| Case 94 | 7  | 110,338,460 | 110,843,795 | 1  | 1 | 2  | 0 |
| Case 94 | 7  | 110,851,553 | 110,909,052 | 2  | 0 | 2  | 1 |
| Case 94 | 7  | 110,915,339 | 159,119,486 | 2  | 1 | 3  | 0 |
| Case 94 | 8  | 164,984     | 43,791,691  | 2  | 0 | 2  | 1 |
| Case 94 | 8  | 46,886,735  | 94,128,797  | 2  | 0 | 2  | 1 |
| Case 94 | 8  | 94,134,191  | 114,676,890 | 5  | 0 | 5  | 1 |
| Case 94 | 8  | 114,677,121 | 115,011,589 | 4  | 0 | 4  | 1 |
| Case 94 | 8  | 115,012,364 | 140,626,831 | 5  | 0 | 5  | 1 |
| Case 94 | 8  | 140,630,990 | 140,676,100 | 6  | 0 | 6  | 1 |
| Case 94 | 8  | 140,676,452 | 143,516,063 | 4  | 0 | 4  | 1 |
| Case 94 | 8  | 143,522,536 | 146,293,414 | 3  | 0 | 3  | 1 |
| Case 94 | 9  | 46,587      | 240,571     | 8  | 0 | 8  | 1 |
| Case 94 | 9  | 244,457     | 5,112,519   | 7  | 0 | 7  | 1 |
| Case 94 | 9  | 5,112,844   | 5,289,943   | 8  | 0 | 8  | 1 |
| Case 94 | 9  | 5,291,710   | 5,493,994   | 22 | 0 | 22 | 1 |
| Case 94 | 9  | 5,494,438   | 5,593,419   | 17 | 0 | 17 | 1 |
| Case 94 | 9  | 5,604,769   | 8,649,429   | 7  | 0 | 7  | 1 |
| Case 94 | 9  | 8,659,757   | 10,386,641  | 9  | 0 | 9  | 1 |
| Case 94 | 9  | 10,387,436  | 17,165,698  | 3  | 0 | 3  | 1 |
| Case 94 | 9  | 17,167,963  | 17,243,746  | 2  | 0 | 2  | 1 |
| Case 94 | 9  | 17,250,170  | 46,944,322  | 3  | 0 | 3  | 1 |
| Case 94 | 9  | 65,629,772  | 132,037,179 | 3  | 0 | 3  | 1 |
| Case 94 | 9  | 132,041,447 | 132,084,621 | 2  | 0 | 2  | 1 |
| Case 94 | 9  | 132,085,237 | 139,468,185 | 3  | 0 | 3  | 1 |
| Case 94 | 9  | 139,477,521 | 140,427,037 | 2  | 0 | 2  | 1 |
| Case 94 | 9  | 140,429,256 | 141,066,491 | 3  | 0 | 3  | 1 |
| Case 94 | 10 | 98,087      | 6,210,740   | 3  | 1 | 4  | 0 |
| Case 94 | 10 | 6,213,807   | 6,224,765   | 4  | 1 | 5  | 0 |
| Case 94 | 10 | 6,228,226   | 39,070,516  | 3  | 1 | 4  | 0 |
| Case 94 | 10 | 39,088,829  | 39,097,912  | 2  | 0 | 2  | 1 |
| Case 94 | 10 | 42,436,301  | 42,907,201  | 2  | 0 | 2  | 1 |
| Case 94 | 10 | 42,907,260  | 76,092,691  | 3  | 0 | 3  | 1 |
| Case 94 | 10 | 76,131,244  | 76,437,114  | 4  | 0 | 4  | 1 |
| Case 94 | 10 | 76,449,813  | 76,705,881  | 3  | 0 | 3  | 1 |

|         |    |             |             |    |   |    |   |
|---------|----|-------------|-------------|----|---|----|---|
| Case 94 | 10 | 76,726,096  | 76,867,899  | 4  | 0 | 4  | 1 |
| Case 94 | 10 | 76,867,952  | 78,772,456  | 3  | 0 | 3  | 1 |
| Case 94 | 10 | 78,774,252  | 78,988,848  | 5  | 0 | 5  | 1 |
| Case 94 | 10 | 78,993,943  | 79,274,098  | 3  | 0 | 3  | 1 |
| Case 94 | 10 | 79,278,832  | 79,704,394  | 5  | 0 | 5  | 1 |
| Case 94 | 10 | 79,713,315  | 80,729,631  | 3  | 0 | 3  | 1 |
| Case 94 | 10 | 80,739,356  | 80,801,482  | 14 | 2 | 16 | 0 |
| Case 94 | 10 | 80,807,633  | 81,194,236  | 4  | 0 | 4  | 1 |
| Case 94 | 10 | 81,195,310  | 85,032,996  | 3  | 0 | 3  | 1 |
| Case 94 | 10 | 85,043,105  | 85,254,486  | 2  | 0 | 2  | 1 |
| Case 94 | 10 | 85,259,487  | 86,093,951  | 3  | 0 | 3  | 1 |
| Case 94 | 10 | 86,098,324  | 86,198,432  | 1  | 0 | 1  | 0 |
| Case 94 | 10 | 86,199,507  | 120,978,183 | 3  | 0 | 3  | 1 |
| Case 94 | 10 | 120,979,749 | 121,323,204 | 4  | 0 | 4  | 1 |
| Case 94 | 10 | 121,328,009 | 122,303,500 | 3  | 0 | 3  | 1 |
| Case 94 | 10 | 122,307,101 | 122,385,035 | 4  | 0 | 4  | 1 |
| Case 94 | 10 | 122,386,059 | 123,115,687 | 19 | 0 | 19 | 1 |
| Case 94 | 10 | 123,117,653 | 123,241,686 | 23 | 0 | 23 | 1 |
| Case 94 | 10 | 123,241,794 | 123,510,055 | 18 | 0 | 18 | 1 |
| Case 94 | 10 | 123,518,349 | 126,097,420 | 3  | 0 | 3  | 1 |
| Case 94 | 10 | 126,100,523 | 126,764,413 | 5  | 0 | 5  | 1 |
| Case 94 | 10 | 126,773,746 | 127,280,307 | 3  | 0 | 3  | 1 |
| Case 94 | 10 | 127,295,915 | 127,372,061 | 4  | 0 | 4  | 1 |
| Case 94 | 10 | 127,372,751 | 135,477,883 | 3  | 0 | 3  | 1 |
| Case 94 | 11 | 193,146     | 2,691,500   | 2  | 0 | 2  | 1 |
| Case 94 | 11 | 2,694,606   | 3,890,059   | 2  | 1 | 3  | 0 |
| Case 94 | 11 | 3,890,853   | 22,297,707  | 2  | 2 | 4  | 0 |
| Case 94 | 11 | 22,301,215  | 22,457,449  | 3  | 2 | 5  | 0 |
| Case 94 | 11 | 22,463,940  | 51,591,253  | 2  | 2 | 4  | 0 |
| Case 94 | 11 | 54,794,237  | 60,509,813  | 2  | 2 | 4  | 0 |
| Case 94 | 11 | 60,517,887  | 63,860,718  | 2  | 1 | 3  | 0 |
| Case 94 | 11 | 63,860,826  | 66,054,823  | 3  | 1 | 4  | 0 |
| Case 94 | 11 | 66,055,077  | 70,733,140  | 5  | 1 | 6  | 0 |
| Case 94 | 11 | 70,735,085  | 71,010,750  | 4  | 1 | 5  | 0 |
| Case 94 | 11 | 71,018,309  | 71,735,373  | 5  | 1 | 6  | 0 |
| Case 94 | 11 | 71,739,423  | 84,179,551  | 2  | 0 | 2  | 1 |
| Case 94 | 11 | 84,182,066  | 84,449,873  | 1  | 0 | 1  | 0 |
| Case 94 | 11 | 84,454,391  | 134,934,063 | 2  | 0 | 2  | 1 |
| Case 94 | 12 | 191,619     | 2,907,932   | 3  | 1 | 4  | 0 |
| Case 94 | 12 | 2,907,978   | 7,032,541   | 3  | 0 | 3  | 1 |
| Case 94 | 12 | 7,033,823   | 34,853,011  | 3  | 1 | 4  | 0 |
| Case 94 | 12 | 37,876,400  | 124,596,637 | 3  | 1 | 4  | 0 |
| Case 94 | 12 | 124,605,086 | 124,821,403 | 3  | 2 | 5  | 0 |
| Case 94 | 12 | 124,821,413 | 127,756,618 | 3  | 1 | 4  | 0 |
| Case 94 | 12 | 127,759,267 | 128,926,744 | 3  | 2 | 5  | 0 |
| Case 94 | 12 | 128,929,239 | 133,810,935 | 3  | 0 | 3  | 1 |
| Case 94 | 13 | 19,058,717  | 20,464,188  | 4  | 1 | 5  | 0 |
| Case 94 | 13 | 20,469,457  | 20,596,565  | 2  | 0 | 2  | 1 |
| Case 94 | 13 | 20,617,797  | 35,288,704  | 5  | 0 | 5  | 1 |
| Case 94 | 13 | 35,289,289  | 36,080,945  | 5  | 4 | 9  | 0 |
| Case 94 | 13 | 36,080,957  | 47,992,832  | 4  | 4 | 8  | 0 |
| Case 94 | 13 | 47,993,684  | 53,555,952  | 5  | 0 | 5  | 1 |
| Case 94 | 13 | 53,556,995  | 79,695,827  | 6  | 0 | 6  | 1 |
| Case 94 | 13 | 79,699,392  | 79,741,956  | 7  | 1 | 8  | 0 |
| Case 94 | 13 | 79,754,928  | 103,978,779 | 5  | 0 | 5  | 1 |
| Case 94 | 13 | 103,979,399 | 105,608,323 | 6  | 0 | 6  | 1 |
| Case 94 | 13 | 105,614,657 | 115,103,529 | 5  | 0 | 5  | 1 |
| Case 94 | 14 | 19,280,733  | 20,425,051  | 4  | 1 | 5  | 0 |
| Case 94 | 14 | 20,426,742  | 22,978,516  | 3  | 2 | 5  | 0 |
| Case 94 | 14 | 22,978,577  | 25,323,222  | 2  | 2 | 4  | 0 |
| Case 94 | 14 | 25,323,593  | 36,725,221  | 3  | 2 | 5  | 0 |

|         |    |             |             |   |   |   |   |
|---------|----|-------------|-------------|---|---|---|---|
| Case 94 | 14 | 36,728,531  | 42,625,616  | 3 | 1 | 4 | 0 |
| Case 94 | 14 | 42,634,072  | 43,365,102  | 1 | 1 | 2 | 0 |
| Case 94 | 14 | 43,367,412  | 43,763,264  | 3 | 1 | 4 | 0 |
| Case 94 | 14 | 43,773,651  | 44,039,374  | 1 | 1 | 2 | 0 |
| Case 94 | 14 | 44,055,539  | 56,959,440  | 3 | 1 | 4 | 0 |
| Case 94 | 14 | 56,959,881  | 82,075,469  | 1 | 1 | 2 | 0 |
| Case 94 | 14 | 82,086,207  | 84,705,538  | 3 | 1 | 4 | 0 |
| Case 94 | 14 | 84,706,934  | 103,133,060 | 3 | 2 | 5 | 0 |
| Case 94 | 14 | 103,154,191 | 107,287,663 | 2 | 1 | 3 | 0 |
| Case 94 | 15 | 20,034,919  | 32,396,721  | 3 | 0 | 3 | 1 |
| Case 94 | 15 | 32,402,046  | 32,917,689  | 3 | 1 | 4 | 0 |
| Case 94 | 15 | 32,917,691  | 46,661,811  | 3 | 0 | 3 | 1 |
| Case 94 | 15 | 46,662,521  | 46,747,113  | 4 | 0 | 4 | 1 |
| Case 94 | 15 | 46,747,377  | 80,969,116  | 3 | 0 | 3 | 1 |
| Case 94 | 15 | 80,969,283  | 81,143,074  | 4 | 0 | 4 | 1 |
| Case 94 | 15 | 81,151,809  | 102,461,162 | 3 | 0 | 3 | 1 |
| Case 94 | 16 | 88,165      | 5,609,707   | 2 | 1 | 3 | 0 |
| Case 94 | 16 | 5,611,414   | 26,054,595  | 2 | 2 | 4 | 0 |
| Case 94 | 16 | 26,066,489  | 27,399,986  | 3 | 2 | 5 | 0 |
| Case 94 | 16 | 27,400,893  | 28,006,300  | 2 | 2 | 4 | 0 |
| Case 94 | 16 | 28,013,254  | 31,575,186  | 2 | 1 | 3 | 0 |
| Case 94 | 16 | 31,580,272  | 33,557,021  | 3 | 2 | 5 | 0 |
| Case 94 | 16 | 33,836,510  | 35,285,582  | 2 | 1 | 3 | 0 |
| Case 94 | 16 | 46,450,037  | 78,502,277  | 2 | 1 | 3 | 0 |
| Case 94 | 16 | 78,502,389  | 78,712,617  | 1 | 0 | 1 | 0 |
| Case 94 | 16 | 78,713,526  | 78,816,421  | 1 | 1 | 2 | 0 |
| Case 94 | 16 | 78,816,792  | 78,827,057  | 0 | 0 | 0 | 0 |
| Case 94 | 16 | 78,827,366  | 78,864,699  | 1 | 0 | 1 | 0 |
| Case 94 | 16 | 78,865,750  | 79,075,311  | 1 | 1 | 2 | 0 |
| Case 94 | 16 | 79,076,706  | 90,274,695  | 2 | 1 | 3 | 0 |
| Case 94 | 17 | 11,885      | 10,261,080  | 3 | 0 | 3 | 1 |
| Case 94 | 17 | 10,265,218  | 13,565,815  | 2 | 0 | 2 | 1 |
| Case 94 | 17 | 13,565,898  | 13,678,835  | 2 | 1 | 3 | 0 |
| Case 94 | 17 | 13,681,058  | 16,229,232  | 2 | 0 | 2 | 1 |
| Case 94 | 17 | 16,238,203  | 17,045,733  | 4 | 0 | 4 | 1 |
| Case 94 | 17 | 17,046,024  | 17,215,582  | 3 | 0 | 3 | 1 |
| Case 94 | 17 | 17,218,859  | 19,809,749  | 2 | 0 | 2 | 1 |
| Case 94 | 17 | 19,812,541  | 22,242,355  | 2 | 1 | 3 | 0 |
| Case 94 | 17 | 25,268,142  | 34,436,708  | 2 | 1 | 3 | 0 |
| Case 94 | 17 | 34,443,811  | 34,476,396  | 4 | 1 | 5 | 0 |
| Case 94 | 17 | 34,597,521  | 37,073,182  | 2 | 1 | 3 | 0 |
| Case 94 | 17 | 37,073,532  | 41,116,170  | 3 | 1 | 4 | 0 |
| Case 94 | 17 | 41,116,234  | 46,262,171  | 2 | 1 | 3 | 0 |
| Case 94 | 17 | 46,291,414  | 46,407,434  | 3 | 1 | 4 | 0 |
| Case 94 | 17 | 46,411,500  | 81,060,040  | 2 | 1 | 3 | 0 |
| Case 94 | 18 | 87,505      | 1,320,397   | 2 | 1 | 3 | 0 |
| Case 94 | 18 | 1,322,681   | 6,113,748   | 2 | 2 | 4 | 0 |
| Case 94 | 18 | 6,114,231   | 7,874,444   | 2 | 1 | 3 | 0 |
| Case 94 | 18 | 7,877,052   | 15,375,878  | 2 | 2 | 4 | 0 |
| Case 94 | 18 | 18,520,354  | 39,485,540  | 2 | 2 | 4 | 0 |
| Case 94 | 18 | 39,488,062  | 78,015,180  | 2 | 1 | 3 | 0 |
| Case 94 | 19 | 260,912     | 24,379,583  | 2 | 1 | 3 | 0 |
| Case 94 | 19 | 24,392,064  | 24,629,285  | 1 | 0 | 1 | 0 |
| Case 94 | 19 | 27,732,159  | 59,097,160  | 3 | 1 | 4 | 0 |
| Case 94 | 20 | 63,244      | 238,421     | 5 | 1 | 6 | 0 |
| Case 94 | 20 | 238,441     | 288,922     | 3 | 2 | 5 | 0 |
| Case 94 | 20 | 288,996     | 358,935     | 5 | 1 | 6 | 0 |
| Case 94 | 20 | 360,789     | 5,624,890   | 4 | 1 | 5 | 0 |
| Case 94 | 20 | 5,625,023   | 8,537,044   | 4 | 2 | 6 | 0 |
| Case 94 | 20 | 8,542,269   | 9,171,861   | 5 | 2 | 7 | 0 |
| Case 94 | 20 | 9,177,112   | 12,669,394  | 4 | 2 | 6 | 0 |

|         |    |             |             |   |   |   |   |
|---------|----|-------------|-------------|---|---|---|---|
| Case 94 | 20 | 12,670,231  | 14,822,794  | 4 | 1 | 5 | 0 |
| Case 94 | 20 | 14,823,472  | 14,908,741  | 2 | 0 | 2 | 1 |
| Case 94 | 20 | 14,910,258  | 15,227,636  | 1 | 0 | 1 | 0 |
| Case 94 | 20 | 15,228,295  | 15,344,549  | 3 | 0 | 3 | 1 |
| Case 94 | 20 | 15,345,664  | 26,293,985  | 4 | 1 | 5 | 0 |
| Case 94 | 20 | 29,425,357  | 37,947,434  | 4 | 1 | 5 | 0 |
| Case 94 | 20 | 37,947,763  | 38,087,936  | 5 | 2 | 7 | 0 |
| Case 94 | 20 | 38,090,481  | 50,789,218  | 4 | 1 | 5 | 0 |
| Case 94 | 20 | 50,794,079  | 54,545,112  | 5 | 1 | 6 | 0 |
| Case 94 | 20 | 54,545,162  | 62,948,788  | 4 | 1 | 5 | 0 |
| Case 94 | 21 | 10,827,533  | 10,971,337  | 1 | 0 | 1 | 0 |
| Case 94 | 21 | 14,368,320  | 16,629,033  | 1 | 0 | 1 | 0 |
| Case 94 | 21 | 16,632,477  | 20,595,409  | 2 | 0 | 2 | 1 |
| Case 94 | 21 | 20,604,811  | 21,245,807  | 1 | 0 | 1 | 0 |
| Case 94 | 21 | 21,247,672  | 32,682,256  | 2 | 0 | 2 | 1 |
| Case 94 | 21 | 32,682,873  | 33,238,952  | 1 | 0 | 1 | 0 |
| Case 94 | 21 | 33,244,333  | 34,240,068  | 2 | 0 | 2 | 1 |
| Case 94 | 21 | 34,243,137  | 37,375,643  | 3 | 0 | 3 | 1 |
| Case 94 | 21 | 37,381,848  | 39,285,453  | 2 | 0 | 2 | 1 |
| Case 94 | 21 | 39,288,940  | 44,047,806  | 1 | 0 | 1 | 0 |
| Case 94 | 21 | 44,051,855  | 44,761,874  | 2 | 0 | 2 | 1 |
| Case 94 | 21 | 44,762,655  | 48,100,155  | 1 | 0 | 1 | 0 |
| Case 94 | 22 | 16,114,244  | 17,493,293  | 3 | 1 | 4 | 0 |
| Case 94 | 22 | 17,493,520  | 27,965,370  | 2 | 1 | 3 | 0 |
| Case 94 | 22 | 27,966,655  | 28,071,675  | 3 | 1 | 4 | 0 |
| Case 94 | 22 | 28,071,706  | 51,195,728  | 2 | 1 | 3 | 0 |
| Case 94 | X  | 2,700,157   | 58,488,110  | 2 | 0 | 2 | 1 |
| Case 94 | X  | 61,694,576  | 154,898,561 | 2 | 0 | 2 | 1 |
| Case 95 | 1  | 82,154      | 1,005,806   | 2 | 0 | 2 | 1 |
| Case 95 | 1  | 1,017,197   | 1,846,582   | 2 | 2 | 4 | 0 |
| Case 95 | 1  | 1,846,765   | 2,026,361   | 3 | 1 | 4 | 0 |
| Case 95 | 1  | 2,026,403   | 6,304,618   | 2 | 1 | 3 | 0 |
| Case 95 | 1  | 6,305,557   | 6,504,575   | 3 | 1 | 4 | 0 |
| Case 95 | 1  | 6,504,598   | 12,309,350  | 2 | 1 | 3 | 0 |
| Case 95 | 1  | 12,309,363  | 16,123,199  | 3 | 1 | 4 | 0 |
| Case 95 | 1  | 16,124,438  | 16,368,977  | 2 | 1 | 3 | 0 |
| Case 95 | 1  | 16,371,067  | 18,049,872  | 3 | 1 | 4 | 0 |
| Case 95 | 1  | 18,052,645  | 20,141,465  | 3 | 0 | 3 | 1 |
| Case 95 | 1  | 20,141,528  | 20,517,632  | 4 | 0 | 4 | 1 |
| Case 95 | 1  | 20,517,755  | 20,684,705  | 4 | 1 | 5 | 0 |
| Case 95 | 1  | 20,687,285  | 24,256,932  | 3 | 0 | 3 | 1 |
| Case 95 | 1  | 24,264,244  | 24,609,935  | 4 | 0 | 4 | 1 |
| Case 95 | 1  | 24,610,584  | 31,454,183  | 3 | 0 | 3 | 1 |
| Case 95 | 1  | 31,461,438  | 32,280,699  | 4 | 0 | 4 | 1 |
| Case 95 | 1  | 32,280,724  | 36,479,642  | 3 | 0 | 3 | 1 |
| Case 95 | 1  | 36,488,199  | 36,749,925  | 4 | 1 | 5 | 0 |
| Case 95 | 1  | 36,752,410  | 46,633,874  | 3 | 0 | 3 | 1 |
| Case 95 | 1  | 46,635,209  | 46,782,192  | 4 | 0 | 4 | 1 |
| Case 95 | 1  | 46,795,447  | 53,644,967  | 2 | 0 | 2 | 1 |
| Case 95 | 1  | 53,646,557  | 54,114,033  | 3 | 0 | 3 | 1 |
| Case 95 | 1  | 54,120,873  | 70,048,269  | 2 | 0 | 2 | 1 |
| Case 95 | 1  | 70,057,783  | 72,234,070  | 1 | 0 | 1 | 0 |
| Case 95 | 1  | 72,239,513  | 81,049,018  | 2 | 0 | 2 | 1 |
| Case 95 | 1  | 81,052,058  | 82,232,757  | 1 | 0 | 1 | 0 |
| Case 95 | 1  | 82,237,323  | 88,428,199  | 2 | 0 | 2 | 1 |
| Case 95 | 1  | 88,430,037  | 88,825,604  | 4 | 0 | 4 | 1 |
| Case 95 | 1  | 88,843,632  | 93,907,020  | 2 | 0 | 2 | 1 |
| Case 95 | 1  | 93,909,887  | 94,241,556  | 3 | 0 | 3 | 1 |
| Case 95 | 1  | 94,250,201  | 102,760,382 | 2 | 0 | 2 | 1 |
| Case 95 | 1  | 102,791,263 | 104,458,885 | 1 | 0 | 1 | 0 |
| Case 95 | 1  | 104,469,208 | 106,953,168 | 0 | 0 | 0 | 0 |

|         |   |             |             |   |   |   |   |
|---------|---|-------------|-------------|---|---|---|---|
| Case 95 | 1 | 106,967,467 | 107,205,384 | 1 | 0 | 1 | 0 |
| Case 95 | 1 | 107,218,527 | 117,238,446 | 2 | 0 | 2 | 1 |
| Case 95 | 1 | 117,243,440 | 121,346,616 | 2 | 2 | 4 | 0 |
| Case 95 | 1 | 142,649,718 | 152,732,106 | 3 | 2 | 5 | 0 |
| Case 95 | 1 | 152,732,174 | 158,151,246 | 2 | 2 | 4 | 0 |
| Case 95 | 1 | 158,151,305 | 159,531,750 | 2 | 1 | 3 | 0 |
| Case 95 | 1 | 159,533,068 | 171,766,580 | 2 | 2 | 4 | 0 |
| Case 95 | 1 | 171,766,696 | 172,039,455 | 3 | 2 | 5 | 0 |
| Case 95 | 1 | 172,040,583 | 182,058,661 | 2 | 2 | 4 | 0 |
| Case 95 | 1 | 182,058,955 | 182,116,368 | 3 | 2 | 5 | 0 |
| Case 95 | 1 | 182,119,516 | 199,019,492 | 2 | 2 | 4 | 0 |
| Case 95 | 1 | 199,019,855 | 199,254,953 | 4 | 2 | 6 | 0 |
| Case 95 | 1 | 199,257,785 | 200,247,025 | 3 | 1 | 4 | 0 |
| Case 95 | 1 | 200,247,910 | 200,728,818 | 4 | 1 | 5 | 0 |
| Case 95 | 1 | 200,750,576 | 201,085,996 | 1 | 1 | 2 | 0 |
| Case 95 | 1 | 201,088,889 | 201,437,568 | 2 | 1 | 3 | 0 |
| Case 95 | 1 | 201,437,730 | 202,099,145 | 1 | 1 | 2 | 0 |
| Case 95 | 1 | 202,100,239 | 202,252,752 | 2 | 1 | 3 | 0 |
| Case 95 | 1 | 202,266,547 | 203,468,932 | 1 | 1 | 2 | 0 |
| Case 95 | 1 | 203,472,112 | 203,749,270 | 2 | 1 | 3 | 0 |
| Case 95 | 1 | 203,753,454 | 214,324,877 | 1 | 1 | 2 | 0 |
| Case 95 | 1 | 214,332,987 | 216,214,996 | 2 | 1 | 3 | 0 |
| Case 95 | 1 | 216,215,741 | 226,044,766 | 1 | 1 | 2 | 0 |
| Case 95 | 1 | 226,046,964 | 234,602,611 | 2 | 1 | 3 | 0 |
| Case 95 | 1 | 234,603,322 | 234,782,449 | 3 | 1 | 4 | 0 |
| Case 95 | 1 | 234,789,114 | 235,152,757 | 3 | 2 | 5 | 0 |
| Case 95 | 1 | 235,185,285 | 237,862,587 | 2 | 1 | 3 | 0 |
| Case 95 | 1 | 237,868,623 | 239,714,774 | 2 | 2 | 4 | 0 |
| Case 95 | 1 | 239,717,680 | 241,413,586 | 2 | 1 | 3 | 0 |
| Case 95 | 1 | 241,420,962 | 244,272,338 | 2 | 2 | 4 | 0 |
| Case 95 | 1 | 244,275,252 | 246,349,328 | 2 | 1 | 3 | 0 |
| Case 95 | 1 | 246,353,934 | 246,512,218 | 1 | 1 | 2 | 0 |
| Case 95 | 1 | 246,516,011 | 246,854,862 | 3 | 1 | 4 | 0 |
| Case 95 | 1 | 246,859,182 | 248,551,598 | 2 | 1 | 3 | 0 |
| Case 95 | 1 | 248,551,727 | 249,218,992 | 2 | 2 | 4 | 0 |
| Case 95 | 2 | 18,674      | 10,332,539  | 1 | 1 | 2 | 0 |
| Case 95 | 2 | 10,333,767  | 10,393,038  | 2 | 1 | 3 | 0 |
| Case 95 | 2 | 10,394,082  | 11,706,672  | 1 | 1 | 2 | 0 |
| Case 95 | 2 | 11,706,693  | 12,083,477  | 2 | 1 | 3 | 0 |
| Case 95 | 2 | 12,084,726  | 26,053,166  | 1 | 1 | 2 | 0 |
| Case 95 | 2 | 26,075,213  | 28,113,157  | 3 | 1 | 4 | 0 |
| Case 95 | 2 | 28,117,453  | 28,498,321  | 2 | 1 | 3 | 0 |
| Case 95 | 2 | 28,510,347  | 28,687,043  | 3 | 2 | 5 | 0 |
| Case 95 | 2 | 28,690,957  | 28,892,960  | 3 | 1 | 4 | 0 |
| Case 95 | 2 | 28,894,560  | 42,895,816  | 2 | 1 | 3 | 0 |
| Case 95 | 2 | 42,900,991  | 43,355,955  | 3 | 1 | 4 | 0 |
| Case 95 | 2 | 43,357,022  | 69,487,812  | 2 | 1 | 3 | 0 |
| Case 95 | 2 | 69,487,977  | 69,936,635  | 3 | 1 | 4 | 0 |
| Case 95 | 2 | 69,939,841  | 74,803,676  | 2 | 1 | 3 | 0 |
| Case 95 | 2 | 74,803,718  | 75,128,656  | 2 | 2 | 4 | 0 |
| Case 95 | 2 | 75,138,842  | 79,476,674  | 2 | 1 | 3 | 0 |
| Case 95 | 2 | 79,478,859  | 79,979,268  | 1 | 1 | 2 | 0 |
| Case 95 | 2 | 79,982,689  | 85,459,682  | 2 | 1 | 3 | 0 |
| Case 95 | 2 | 85,459,880  | 85,876,681  | 4 | 1 | 5 | 0 |
| Case 95 | 2 | 85,877,081  | 92,081,640  | 2 | 1 | 3 | 0 |
| Case 95 | 2 | 95,429,424  | 102,362,333 | 2 | 1 | 3 | 0 |
| Case 95 | 2 | 102,367,562 | 102,769,373 | 3 | 1 | 4 | 0 |
| Case 95 | 2 | 102,769,786 | 108,640,313 | 2 | 1 | 3 | 0 |
| Case 95 | 2 | 108,645,033 | 109,237,865 | 3 | 1 | 4 | 0 |
| Case 95 | 2 | 109,260,259 | 113,322,066 | 2 | 1 | 3 | 0 |
| Case 95 | 2 | 113,322,346 | 113,590,390 | 3 | 1 | 4 | 0 |

|         |   |             |             |   |   |   |   |
|---------|---|-------------|-------------|---|---|---|---|
| Case 95 | 2 | 113,590,467 | 128,319,195 | 2 | 1 | 3 | 0 |
| Case 95 | 2 | 128,321,770 | 128,818,557 | 3 | 1 | 4 | 0 |
| Case 95 | 2 | 128,822,702 | 129,126,942 | 4 | 1 | 5 | 0 |
| Case 95 | 2 | 129,128,066 | 165,567,695 | 2 | 1 | 3 | 0 |
| Case 95 | 2 | 165,568,585 | 165,890,733 | 2 | 2 | 4 | 0 |
| Case 95 | 2 | 165,902,214 | 213,824,781 | 2 | 1 | 3 | 0 |
| Case 95 | 2 | 213,825,327 | 214,993,997 | 1 | 1 | 2 | 0 |
| Case 95 | 2 | 214,994,793 | 243,048,760 | 2 | 1 | 3 | 0 |
| Case 95 | 3 | 61,495      | 874,972     | 4 | 0 | 4 | 1 |
| Case 95 | 3 | 877,099     | 6,680,311   | 3 | 0 | 3 | 1 |
| Case 95 | 3 | 6,683,606   | 14,665,333  | 4 | 0 | 4 | 1 |
| Case 95 | 3 | 14,665,953  | 14,960,204  | 5 | 0 | 5 | 1 |
| Case 95 | 3 | 14,964,296  | 39,225,943  | 4 | 0 | 4 | 1 |
| Case 95 | 3 | 39,225,946  | 45,613,379  | 3 | 0 | 3 | 1 |
| Case 95 | 3 | 45,613,681  | 50,655,190  | 2 | 0 | 2 | 1 |
| Case 95 | 3 | 50,657,826  | 60,228,660  | 1 | 0 | 1 | 0 |
| Case 95 | 3 | 60,235,256  | 60,522,599  | 0 | 0 | 0 | 0 |
| Case 95 | 3 | 60,523,330  | 66,433,730  | 1 | 0 | 1 | 0 |
| Case 95 | 3 | 66,433,735  | 66,823,237  | 2 | 0 | 2 | 1 |
| Case 95 | 3 | 66,833,437  | 90,442,925  | 1 | 0 | 1 | 0 |
| Case 95 | 3 | 93,537,290  | 93,595,933  | 1 | 0 | 1 | 0 |
| Case 95 | 3 | 93,598,150  | 95,186,258  | 2 | 1 | 3 | 0 |
| Case 95 | 3 | 95,225,762  | 95,716,185  | 3 | 2 | 5 | 0 |
| Case 95 | 3 | 95,723,140  | 119,606,078 | 2 | 1 | 3 | 0 |
| Case 95 | 3 | 119,610,793 | 120,167,006 | 3 | 1 | 4 | 0 |
| Case 95 | 3 | 120,179,752 | 122,902,918 | 2 | 1 | 3 | 0 |
| Case 95 | 3 | 122,912,292 | 123,232,693 | 3 | 1 | 4 | 0 |
| Case 95 | 3 | 123,243,426 | 128,242,205 | 2 | 1 | 3 | 0 |
| Case 95 | 3 | 128,243,631 | 129,350,751 | 3 | 1 | 4 | 0 |
| Case 95 | 3 | 129,355,240 | 172,206,961 | 2 | 1 | 3 | 0 |
| Case 95 | 3 | 172,215,575 | 172,399,955 | 3 | 1 | 4 | 0 |
| Case 95 | 3 | 172,400,899 | 193,363,535 | 2 | 1 | 3 | 0 |
| Case 95 | 3 | 193,365,544 | 193,821,569 | 2 | 2 | 4 | 0 |
| Case 95 | 3 | 193,824,905 | 194,238,889 | 2 | 1 | 3 | 0 |
| Case 95 | 3 | 194,244,722 | 195,185,582 | 1 | 1 | 2 | 0 |
| Case 95 | 3 | 195,188,641 | 197,838,262 | 1 | 0 | 1 | 0 |
| Case 95 | 4 | 71,566      | 898,459     | 2 | 1 | 3 | 0 |
| Case 95 | 4 | 899,143     | 6,768,043   | 3 | 1 | 4 | 0 |
| Case 95 | 4 | 6,771,474   | 32,762,981  | 2 | 1 | 3 | 0 |
| Case 95 | 4 | 32,773,352  | 34,015,067  | 2 | 2 | 4 | 0 |
| Case 95 | 4 | 34,043,420  | 44,964,929  | 1 | 1 | 2 | 0 |
| Case 95 | 4 | 44,976,703  | 45,995,759  | 1 | 0 | 1 | 0 |
| Case 95 | 4 | 46,025,913  | 46,789,898  | 1 | 1 | 2 | 0 |
| Case 95 | 4 | 46,796,836  | 46,929,104  | 1 | 0 | 1 | 0 |
| Case 95 | 4 | 46,930,390  | 47,109,360  | 2 | 1 | 3 | 0 |
| Case 95 | 4 | 47,132,261  | 47,746,602  | 1 | 0 | 1 | 0 |
| Case 95 | 4 | 47,752,554  | 49,552,325  | 1 | 1 | 2 | 0 |
| Case 95 | 4 | 49,553,810  | 49,620,898  | 2 | 1 | 3 | 0 |
| Case 95 | 4 | 52,697,856  | 53,980,677  | 2 | 1 | 3 | 0 |
| Case 95 | 4 | 53,982,975  | 55,049,751  | 1 | 1 | 2 | 0 |
| Case 95 | 4 | 55,061,398  | 57,897,491  | 2 | 1 | 3 | 0 |
| Case 95 | 4 | 57,897,864  | 83,115,904  | 1 | 1 | 2 | 0 |
| Case 95 | 4 | 83,130,688  | 83,573,730  | 2 | 1 | 3 | 0 |
| Case 95 | 4 | 83,576,973  | 100,147,101 | 1 | 1 | 2 | 0 |
| Case 95 | 4 | 100,171,379 | 100,472,128 | 2 | 1 | 3 | 0 |
| Case 95 | 4 | 100,472,636 | 169,828,862 | 1 | 1 | 2 | 0 |
| Case 95 | 4 | 169,835,150 | 170,145,050 | 2 | 1 | 3 | 0 |
| Case 95 | 4 | 170,146,632 | 185,227,184 | 1 | 1 | 2 | 0 |
| Case 95 | 4 | 185,234,505 | 185,280,853 | 3 | 2 | 5 | 0 |
| Case 95 | 4 | 185,284,684 | 190,963,766 | 1 | 1 | 2 | 0 |
| Case 95 | 5 | 38,139      | 353,885     | 2 | 1 | 3 | 0 |

|         |   |             |             |   |   |   |   |
|---------|---|-------------|-------------|---|---|---|---|
| Case 95 | 5 | 354,051     | 464,477     | 3 | 1 | 4 | 0 |
| Case 95 | 5 | 475,076     | 14,465,355  | 2 | 1 | 3 | 0 |
| Case 95 | 5 | 14,465,657  | 14,655,699  | 3 | 1 | 4 | 0 |
| Case 95 | 5 | 14,657,062  | 32,724,875  | 2 | 1 | 3 | 0 |
| Case 95 | 5 | 32,733,418  | 34,123,933  | 3 | 2 | 5 | 0 |
| Case 95 | 5 | 34,166,261  | 36,679,739  | 2 | 2 | 4 | 0 |
| Case 95 | 5 | 36,680,125  | 38,300,133  | 2 | 1 | 3 | 0 |
| Case 95 | 5 | 38,305,547  | 40,389,129  | 2 | 2 | 4 | 0 |
| Case 95 | 5 | 40,392,728  | 40,950,095  | 2 | 1 | 3 | 0 |
| Case 95 | 5 | 40,953,191  | 42,719,092  | 2 | 2 | 4 | 0 |
| Case 95 | 5 | 42,719,239  | 43,917,438  | 3 | 1 | 4 | 0 |
| Case 95 | 5 | 43,927,216  | 44,632,008  | 2 | 2 | 4 | 0 |
| Case 95 | 5 | 44,646,453  | 45,998,686  | 2 | 1 | 3 | 0 |
| Case 95 | 5 | 46,019,244  | 46,399,093  | 1 | 0 | 1 | 0 |
| Case 95 | 5 | 49,457,282  | 51,724,318  | 1 | 0 | 1 | 0 |
| Case 95 | 5 | 51,733,627  | 52,141,943  | 1 | 1 | 2 | 0 |
| Case 95 | 5 | 52,153,066  | 52,751,154  | 3 | 1 | 4 | 0 |
| Case 95 | 5 | 52,752,242  | 56,988,506  | 1 | 0 | 1 | 0 |
| Case 95 | 5 | 57,004,423  | 58,197,893  | 3 | 1 | 4 | 0 |
| Case 95 | 5 | 58,201,950  | 58,446,582  | 1 | 0 | 1 | 0 |
| Case 95 | 5 | 58,448,733  | 58,988,846  | 2 | 0 | 2 | 1 |
| Case 95 | 5 | 59,001,077  | 64,865,826  | 1 | 0 | 1 | 0 |
| Case 95 | 5 | 64,867,775  | 72,587,455  | 1 | 1 | 2 | 0 |
| Case 95 | 5 | 72,591,905  | 72,954,453  | 3 | 1 | 4 | 0 |
| Case 95 | 5 | 72,979,253  | 74,963,600  | 1 | 1 | 2 | 0 |
| Case 95 | 5 | 74,964,582  | 77,711,356  | 1 | 0 | 1 | 0 |
| Case 95 | 5 | 77,716,621  | 78,265,041  | 2 | 0 | 2 | 1 |
| Case 95 | 5 | 78,267,797  | 79,663,875  | 1 | 0 | 1 | 0 |
| Case 95 | 5 | 79,664,768  | 81,946,255  | 1 | 1 | 2 | 0 |
| Case 95 | 5 | 81,951,284  | 83,629,549  | 2 | 1 | 3 | 0 |
| Case 95 | 5 | 83,632,691  | 84,242,662  | 1 | 1 | 2 | 0 |
| Case 95 | 5 | 84,248,966  | 116,672,520 | 1 | 0 | 1 | 0 |
| Case 95 | 5 | 116,680,760 | 131,986,463 | 1 | 1 | 2 | 0 |
| Case 95 | 5 | 131,992,409 | 132,109,742 | 2 | 1 | 3 | 0 |
| Case 95 | 5 | 132,111,043 | 140,187,182 | 1 | 1 | 2 | 0 |
| Case 95 | 5 | 140,187,322 | 141,894,557 | 2 | 0 | 2 | 1 |
| Case 95 | 5 | 141,901,900 | 142,221,460 | 4 | 0 | 4 | 1 |
| Case 95 | 5 | 142,228,026 | 150,402,570 | 2 | 0 | 2 | 1 |
| Case 95 | 5 | 150,402,873 | 150,617,370 | 3 | 0 | 3 | 1 |
| Case 95 | 5 | 150,618,829 | 153,896,160 | 2 | 0 | 2 | 1 |
| Case 95 | 5 | 153,899,307 | 180,693,127 | 2 | 1 | 3 | 0 |
| Case 95 | 6 | 108,666     | 1,712,223   | 2 | 1 | 3 | 0 |
| Case 95 | 6 | 1,712,283   | 2,106,309   | 0 | 0 | 0 | 0 |
| Case 95 | 6 | 2,111,091   | 30,652,781  | 2 | 1 | 3 | 0 |
| Case 95 | 6 | 30,652,872  | 31,524,851  | 2 | 2 | 4 | 0 |
| Case 95 | 6 | 31,525,319  | 31,878,433  | 3 | 2 | 5 | 0 |
| Case 95 | 6 | 31,880,637  | 32,213,052  | 2 | 1 | 3 | 0 |
| Case 95 | 6 | 32,213,210  | 32,759,448  | 2 | 2 | 4 | 0 |
| Case 95 | 6 | 32,761,154  | 33,096,274  | 3 | 2 | 5 | 0 |
| Case 95 | 6 | 33,096,766  | 33,169,432  | 2 | 2 | 4 | 0 |
| Case 95 | 6 | 33,170,102  | 34,296,962  | 2 | 1 | 3 | 0 |
| Case 95 | 6 | 34,302,869  | 34,512,195  | 3 | 2 | 5 | 0 |
| Case 95 | 6 | 34,513,266  | 37,348,920  | 2 | 1 | 3 | 0 |
| Case 95 | 6 | 37,349,033  | 41,244,020  | 2 | 2 | 4 | 0 |
| Case 95 | 6 | 41,246,473  | 41,621,203  | 3 | 2 | 5 | 0 |
| Case 95 | 6 | 41,621,271  | 43,488,108  | 2 | 1 | 3 | 0 |
| Case 95 | 6 | 43,488,144  | 44,138,343  | 3 | 2 | 5 | 0 |
| Case 95 | 6 | 44,138,947  | 47,277,181  | 2 | 2 | 4 | 0 |
| Case 95 | 6 | 47,287,769  | 47,596,016  | 4 | 2 | 6 | 0 |
| Case 95 | 6 | 47,597,241  | 54,129,982  | 2 | 2 | 4 | 0 |
| Case 95 | 6 | 54,132,353  | 54,994,046  | 2 | 1 | 3 | 0 |

|         |   |             |             |   |   |   |   |
|---------|---|-------------|-------------|---|---|---|---|
| Case 95 | 6 | 55,004,835  | 57,182,068  | 2 | 2 | 4 | 0 |
| Case 95 | 6 | 57,182,297  | 58,752,089  | 2 | 1 | 3 | 0 |
| Case 95 | 6 | 61,891,118  | 65,518,623  | 2 | 1 | 3 | 0 |
| Case 95 | 6 | 65,520,297  | 108,791,307 | 1 | 1 | 2 | 0 |
| Case 95 | 6 | 108,798,097 | 109,802,649 | 2 | 1 | 3 | 0 |
| Case 95 | 6 | 109,802,929 | 117,785,270 | 1 | 1 | 2 | 0 |
| Case 95 | 6 | 117,785,696 | 120,233,977 | 2 | 1 | 3 | 0 |
| Case 95 | 6 | 120,244,785 | 125,673,963 | 1 | 1 | 2 | 0 |
| Case 95 | 6 | 125,677,053 | 132,940,293 | 2 | 1 | 3 | 0 |
| Case 95 | 6 | 132,940,429 | 133,076,999 | 3 | 1 | 4 | 0 |
| Case 95 | 6 | 133,077,063 | 162,392,902 | 2 | 1 | 3 | 0 |
| Case 95 | 6 | 162,394,341 | 162,472,025 | 1 | 1 | 2 | 0 |
| Case 95 | 6 | 162,474,893 | 162,847,889 | 1 | 0 | 1 | 0 |
| Case 95 | 6 | 162,850,909 | 162,935,431 | 3 | 0 | 3 | 1 |
| Case 95 | 6 | 162,936,958 | 163,863,551 | 2 | 2 | 4 | 0 |
| Case 95 | 6 | 163,872,036 | 164,838,366 | 3 | 2 | 5 | 0 |
| Case 95 | 6 | 164,841,341 | 165,933,673 | 2 | 2 | 4 | 0 |
| Case 95 | 6 | 165,935,421 | 166,796,433 | 2 | 1 | 3 | 0 |
| Case 95 | 6 | 166,799,022 | 167,407,584 | 2 | 2 | 4 | 0 |
| Case 95 | 6 | 167,412,913 | 168,609,335 | 3 | 2 | 5 | 0 |
| Case 95 | 6 | 168,612,631 | 170,980,171 | 2 | 2 | 4 | 0 |
| Case 95 | 7 | 44,935      | 707,639     | 2 | 0 | 2 | 1 |
| Case 95 | 7 | 710,012     | 16,700,447  | 2 | 1 | 3 | 0 |
| Case 95 | 7 | 16,700,798  | 16,848,712  | 4 | 2 | 6 | 0 |
| Case 95 | 7 | 16,848,890  | 16,889,926  | 5 | 2 | 7 | 0 |
| Case 95 | 7 | 16,890,368  | 17,169,922  | 4 | 2 | 6 | 0 |
| Case 95 | 7 | 17,170,680  | 22,268,760  | 2 | 1 | 3 | 0 |
| Case 95 | 7 | 22,269,345  | 22,598,742  | 3 | 1 | 4 | 0 |
| Case 95 | 7 | 22,601,127  | 30,182,813  | 2 | 1 | 3 | 0 |
| Case 95 | 7 | 30,185,796  | 30,347,038  | 1 | 1 | 2 | 0 |
| Case 95 | 7 | 30,367,936  | 33,738,345  | 2 | 1 | 3 | 0 |
| Case 95 | 7 | 33,741,217  | 34,017,577  | 1 | 1 | 2 | 0 |
| Case 95 | 7 | 34,021,755  | 36,027,179  | 2 | 1 | 3 | 0 |
| Case 95 | 7 | 36,031,972  | 49,127,859  | 2 | 2 | 4 | 0 |
| Case 95 | 7 | 49,145,008  | 49,681,873  | 4 | 2 | 6 | 0 |
| Case 95 | 7 | 49,686,888  | 49,808,395  | 3 | 2 | 5 | 0 |
| Case 95 | 7 | 49,810,966  | 58,019,061  | 2 | 2 | 4 | 0 |
| Case 95 | 7 | 61,056,053  | 62,154,874  | 2 | 2 | 4 | 0 |
| Case 95 | 7 | 62,159,926  | 64,030,116  | 2 | 1 | 3 | 0 |
| Case 95 | 7 | 64,054,804  | 64,679,561  | 1 | 0 | 1 | 0 |
| Case 95 | 7 | 64,696,330  | 65,088,807  | 2 | 1 | 3 | 0 |
| Case 95 | 7 | 65,195,552  | 73,491,212  | 1 | 0 | 1 | 0 |
| Case 95 | 7 | 73,493,533  | 75,179,843  | 1 | 1 | 2 | 0 |
| Case 95 | 7 | 75,180,033  | 76,131,706  | 2 | 1 | 3 | 0 |
| Case 95 | 7 | 76,132,073  | 98,645,517  | 1 | 1 | 2 | 0 |
| Case 95 | 7 | 98,647,139  | 98,933,250  | 2 | 1 | 3 | 0 |
| Case 95 | 7 | 98,933,689  | 99,460,458  | 1 | 1 | 2 | 0 |
| Case 95 | 7 | 99,461,160  | 99,778,269  | 2 | 1 | 3 | 0 |
| Case 95 | 7 | 99,786,108  | 101,864,836 | 1 | 1 | 2 | 0 |
| Case 95 | 7 | 101,865,210 | 102,436,004 | 2 | 1 | 3 | 0 |
| Case 95 | 7 | 102,440,184 | 106,612,197 | 1 | 1 | 2 | 0 |
| Case 95 | 7 | 106,614,237 | 107,472,138 | 2 | 1 | 3 | 0 |
| Case 95 | 7 | 107,472,872 | 135,925,039 | 1 | 1 | 2 | 0 |
| Case 95 | 7 | 135,938,900 | 136,326,080 | 2 | 1 | 3 | 0 |
| Case 95 | 7 | 136,327,805 | 155,569,983 | 1 | 1 | 2 | 0 |
| Case 95 | 7 | 155,572,107 | 155,901,297 | 2 | 1 | 3 | 0 |
| Case 95 | 7 | 155,914,367 | 159,119,486 | 1 | 1 | 2 | 0 |
| Case 95 | 8 | 164,984     | 8,222,480   | 2 | 0 | 2 | 1 |
| Case 95 | 8 | 8,230,361   | 8,378,992   | 4 | 0 | 4 | 1 |
| Case 95 | 8 | 8,380,016   | 18,943,802  | 2 | 0 | 2 | 1 |
| Case 95 | 8 | 18,945,519  | 19,189,125  | 3 | 0 | 3 | 1 |



|         |    |             |             |   |   |   |   |
|---------|----|-------------|-------------|---|---|---|---|
| Case 95 | 8  | 19,189,757  | 22,713,012  | 2 | 0 | 2 | 1 |
| Case 95 | 8  | 22,718,237  | 25,165,819  | 3 | 0 | 3 | 1 |
| Case 95 | 8  | 25,172,706  | 29,253,809  | 2 | 0 | 2 | 1 |
| Case 95 | 8  | 29,255,584  | 29,754,597  | 3 | 0 | 3 | 1 |
| Case 95 | 8  | 29,760,101  | 43,414,155  | 2 | 0 | 2 | 1 |
| Case 95 | 8  | 43,447,235  | 43,791,691  | 1 | 0 | 1 | 0 |
| Case 95 | 8  | 46,886,735  | 46,886,735  | 1 | 0 | 1 | 0 |
| Case 95 | 8  | 46,942,842  | 50,070,098  | 2 | 1 | 3 | 0 |
| Case 95 | 8  | 50,072,010  | 52,607,916  | 2 | 0 | 2 | 1 |
| Case 95 | 8  | 52,608,080  | 53,128,122  | 2 | 1 | 3 | 0 |
| Case 95 | 8  | 53,129,669  | 55,049,131  | 2 | 0 | 2 | 1 |
| Case 95 | 8  | 55,049,188  | 62,458,019  | 2 | 1 | 3 | 0 |
| Case 95 | 8  | 62,460,664  | 62,863,950  | 4 | 1 | 5 | 0 |
| Case 95 | 8  | 62,866,541  | 78,070,394  | 2 | 1 | 3 | 0 |
| Case 95 | 8  | 78,093,837  | 79,918,459  | 1 | 1 | 2 | 0 |
| Case 95 | 8  | 79,924,472  | 82,123,005  | 2 | 1 | 3 | 0 |
| Case 95 | 8  | 82,149,338  | 82,370,252  | 3 | 1 | 4 | 0 |
| Case 95 | 8  | 82,370,871  | 96,211,820  | 2 | 1 | 3 | 0 |
| Case 95 | 8  | 96,212,069  | 96,874,831  | 2 | 2 | 4 | 0 |
| Case 95 | 8  | 96,881,703  | 101,284,322 | 2 | 1 | 3 | 0 |
| Case 95 | 8  | 101,285,717 | 101,813,156 | 4 | 1 | 5 | 0 |
| Case 95 | 8  | 101,816,789 | 120,034,105 | 2 | 1 | 3 | 0 |
| Case 95 | 8  | 120,039,462 | 120,271,776 | 3 | 1 | 4 | 0 |
| Case 95 | 8  | 120,275,270 | 128,252,993 | 2 | 1 | 3 | 0 |
| Case 95 | 8  | 128,258,492 | 128,390,660 | 2 | 2 | 4 | 0 |
| Case 95 | 8  | 128,390,957 | 128,834,403 | 3 | 2 | 5 | 0 |
| Case 95 | 8  | 128,840,276 | 146,293,414 | 2 | 2 | 4 | 0 |
| Case 95 | 9  | 46,587      | 4,438,240   | 2 | 1 | 3 | 0 |
| Case 95 | 9  | 4,438,264   | 4,526,525   | 3 | 1 | 4 | 0 |
| Case 95 | 9  | 4,526,642   | 21,966,221  | 2 | 1 | 3 | 0 |
| Case 95 | 9  | 21,970,916  | 22,481,286  | 3 | 1 | 4 | 0 |
| Case 95 | 9  | 22,487,177  | 35,310,490  | 2 | 1 | 3 | 0 |
| Case 95 | 9  | 35,310,492  | 35,561,212  | 3 | 1 | 4 | 0 |
| Case 95 | 9  | 35,562,549  | 35,931,381  | 2 | 1 | 3 | 0 |
| Case 95 | 9  | 35,933,323  | 36,100,504  | 2 | 2 | 4 | 0 |
| Case 95 | 9  | 36,101,562  | 46,944,322  | 2 | 1 | 3 | 0 |
| Case 95 | 9  | 65,629,772  | 103,964,075 | 2 | 0 | 2 | 1 |
| Case 95 | 9  | 103,968,906 | 104,203,482 | 3 | 0 | 3 | 1 |
| Case 95 | 9  | 104,204,614 | 110,116,369 | 2 | 0 | 2 | 1 |
| Case 95 | 9  | 110,120,871 | 110,553,667 | 3 | 0 | 3 | 1 |
| Case 95 | 9  | 110,556,602 | 114,707,212 | 2 | 0 | 2 | 1 |
| Case 95 | 9  | 114,711,743 | 114,888,516 | 2 | 1 | 3 | 0 |
| Case 95 | 9  | 114,888,773 | 115,013,224 | 1 | 0 | 1 | 0 |
| Case 95 | 9  | 115,015,710 | 117,669,585 | 2 | 1 | 3 | 0 |
| Case 95 | 9  | 117,674,320 | 118,029,729 | 2 | 2 | 4 | 0 |
| Case 95 | 9  | 118,039,472 | 124,536,644 | 2 | 1 | 3 | 0 |
| Case 95 | 9  | 124,543,753 | 130,703,565 | 2 | 0 | 2 | 1 |
| Case 95 | 9  | 130,705,120 | 131,351,046 | 3 | 0 | 3 | 1 |
| Case 95 | 9  | 131,356,473 | 132,022,920 | 2 | 0 | 2 | 1 |
| Case 95 | 9  | 132,024,528 | 132,254,665 | 2 | 1 | 3 | 0 |
| Case 95 | 9  | 132,257,783 | 132,758,467 | 5 | 0 | 5 | 1 |
| Case 95 | 9  | 132,759,808 | 136,007,358 | 2 | 0 | 2 | 1 |
| Case 95 | 9  | 136,007,988 | 136,179,704 | 4 | 0 | 4 | 1 |
| Case 95 | 9  | 136,184,526 | 139,230,523 | 2 | 1 | 3 | 0 |
| Case 95 | 9  | 139,231,489 | 141,066,491 | 3 | 1 | 4 | 0 |
| Case 95 | 10 | 98,087      | 33,758,430  | 1 | 0 | 1 | 0 |
| Case 95 | 10 | 33,763,923  | 34,401,632  | 4 | 1 | 5 | 0 |
| Case 95 | 10 | 34,408,636  | 34,509,558  | 6 | 1 | 7 | 0 |
| Case 95 | 10 | 34,511,806  | 36,385,519  | 4 | 1 | 5 | 0 |
| Case 95 | 10 | 36,392,445  | 36,686,162  | 3 | 0 | 3 | 1 |
| Case 95 | 10 | 36,687,210  | 36,863,519  | 2 | 2 | 4 | 0 |

|         |    |             |             |   |   |   |   |
|---------|----|-------------|-------------|---|---|---|---|
| Case 95 | 10 | 36,877,054  | 37,213,409  | 2 | 1 | 3 | 0 |
| Case 95 | 10 | 37,214,419  | 37,712,642  | 1 | 0 | 1 | 0 |
| Case 95 | 10 | 37,721,225  | 37,946,651  | 2 | 1 | 3 | 0 |
| Case 95 | 10 | 37,958,940  | 38,276,810  | 4 | 1 | 5 | 0 |
| Case 95 | 10 | 38,290,878  | 39,097,912  | 2 | 0 | 2 | 1 |
| Case 95 | 10 | 42,436,301  | 95,109,621  | 2 | 0 | 2 | 1 |
| Case 95 | 10 | 95,109,633  | 95,521,230  | 3 | 0 | 3 | 1 |
| Case 95 | 10 | 95,521,457  | 104,126,256 | 2 | 0 | 2 | 1 |
| Case 95 | 10 | 104,127,171 | 115,198,443 | 2 | 1 | 3 | 0 |
| Case 95 | 10 | 115,205,714 | 115,583,459 | 3 | 1 | 4 | 0 |
| Case 95 | 10 | 115,587,010 | 126,962,284 | 2 | 1 | 3 | 0 |
| Case 95 | 10 | 126,963,368 | 127,213,302 | 3 | 1 | 4 | 0 |
| Case 95 | 10 | 127,219,324 | 135,477,883 | 2 | 1 | 3 | 0 |
| Case 95 | 11 | 193,146     | 463,913     | 3 | 1 | 4 | 0 |
| Case 95 | 11 | 470,331     | 810,305     | 2 | 1 | 3 | 0 |
| Case 95 | 11 | 810,318     | 1,265,998   | 3 | 1 | 4 | 0 |
| Case 95 | 11 | 1,267,703   | 1,398,019   | 3 | 0 | 3 | 1 |
| Case 95 | 11 | 1,398,316   | 1,861,852   | 2 | 0 | 2 | 1 |
| Case 95 | 11 | 1,865,091   | 2,068,776   | 3 | 0 | 3 | 1 |
| Case 95 | 11 | 2,070,570   | 11,731,251  | 2 | 0 | 2 | 1 |
| Case 95 | 11 | 11,739,732  | 12,317,933  | 4 | 0 | 4 | 1 |
| Case 95 | 11 | 12,327,308  | 24,543,242  | 2 | 0 | 2 | 1 |
| Case 95 | 11 | 24,544,761  | 25,764,292  | 5 | 2 | 7 | 0 |
| Case 95 | 11 | 25,773,322  | 30,707,698  | 4 | 2 | 6 | 0 |
| Case 95 | 11 | 30,709,418  | 40,769,111  | 2 | 2 | 4 | 0 |
| Case 95 | 11 | 40,772,512  | 40,961,066  | 6 | 2 | 8 | 0 |
| Case 95 | 11 | 40,966,294  | 43,001,206  | 3 | 2 | 5 | 0 |
| Case 95 | 11 | 43,005,220  | 45,711,140  | 4 | 1 | 5 | 0 |
| Case 95 | 11 | 45,717,929  | 50,248,332  | 2 | 1 | 3 | 0 |
| Case 95 | 11 | 50,280,123  | 51,591,253  | 2 | 0 | 2 | 1 |
| Case 95 | 11 | 54,794,237  | 56,107,439  | 2 | 0 | 2 | 1 |
| Case 95 | 11 | 56,113,516  | 57,447,561  | 2 | 1 | 3 | 0 |
| Case 95 | 11 | 57,456,075  | 61,220,222  | 2 | 0 | 2 | 1 |
| Case 95 | 11 | 61,247,995  | 61,736,411  | 3 | 0 | 3 | 1 |
| Case 95 | 11 | 61,737,244  | 74,071,072  | 2 | 0 | 2 | 1 |
| Case 95 | 11 | 74,080,107  | 74,166,320  | 4 | 0 | 4 | 1 |
| Case 95 | 11 | 74,167,630  | 77,611,609  | 2 | 0 | 2 | 1 |
| Case 95 | 11 | 77,617,950  | 77,790,653  | 4 | 0 | 4 | 1 |
| Case 95 | 11 | 77,790,686  | 90,042,539  | 2 | 0 | 2 | 1 |
| Case 95 | 11 | 90,050,153  | 110,341,770 | 1 | 0 | 1 | 0 |
| Case 95 | 11 | 110,357,133 | 128,839,628 | 2 | 0 | 2 | 1 |
| Case 95 | 11 | 128,839,629 | 129,299,871 | 4 | 0 | 4 | 1 |
| Case 95 | 11 | 129,301,284 | 129,507,034 | 5 | 0 | 5 | 1 |
| Case 95 | 11 | 129,523,831 | 134,934,063 | 2 | 0 | 2 | 1 |
| Case 95 | 12 | 191,619     | 2,998,892   | 2 | 1 | 3 | 0 |
| Case 95 | 12 | 3,004,526   | 3,791,143   | 2 | 0 | 2 | 1 |
| Case 95 | 12 | 3,803,566   | 4,553,669   | 3 | 0 | 3 | 1 |
| Case 95 | 12 | 4,554,413   | 34,853,011  | 2 | 0 | 2 | 1 |
| Case 95 | 12 | 37,876,400  | 52,681,088  | 2 | 0 | 2 | 1 |
| Case 95 | 12 | 52,681,841  | 53,025,391  | 3 | 0 | 3 | 1 |
| Case 95 | 12 | 53,030,834  | 53,119,891  | 3 | 1 | 4 | 0 |
| Case 95 | 12 | 53,120,709  | 54,252,030  | 2 | 1 | 3 | 0 |
| Case 95 | 12 | 54,255,207  | 54,649,941  | 3 | 1 | 4 | 0 |
| Case 95 | 12 | 54,651,471  | 54,811,708  | 2 | 1 | 3 | 0 |
| Case 95 | 12 | 54,820,266  | 55,273,926  | 3 | 1 | 4 | 0 |
| Case 95 | 12 | 55,287,145  | 57,055,291  | 2 | 1 | 3 | 0 |
| Case 95 | 12 | 57,056,755  | 95,676,290  | 1 | 1 | 2 | 0 |
| Case 95 | 12 | 95,681,492  | 95,770,832  | 2 | 1 | 3 | 0 |
| Case 95 | 12 | 95,772,953  | 109,907,478 | 1 | 1 | 2 | 0 |
| Case 95 | 12 | 109,907,499 | 110,236,631 | 2 | 1 | 3 | 0 |
| Case 95 | 12 | 110,240,838 | 133,810,935 | 1 | 1 | 2 | 0 |

|         |    |             |             |   |   |   |   |
|---------|----|-------------|-------------|---|---|---|---|
| Case 95 | 13 | 19,058,717  | 27,392,427  | 1 | 1 | 2 | 0 |
| Case 95 | 13 | 27,393,325  | 27,701,862  | 2 | 1 | 3 | 0 |
| Case 95 | 13 | 27,705,697  | 73,603,693  | 1 | 1 | 2 | 0 |
| Case 95 | 13 | 73,609,881  | 74,010,099  | 3 | 1 | 4 | 0 |
| Case 95 | 13 | 74,019,374  | 113,149,675 | 1 | 1 | 2 | 0 |
| Case 95 | 13 | 113,151,341 | 113,465,320 | 2 | 1 | 3 | 0 |
| Case 95 | 13 | 113,467,616 | 115,103,529 | 1 | 1 | 2 | 0 |
| Case 95 | 14 | 19,280,733  | 20,444,236  | 2 | 1 | 3 | 0 |
| Case 95 | 14 | 20,445,370  | 22,498,449  | 2 | 0 | 2 | 1 |
| Case 95 | 14 | 22,499,160  | 23,006,908  | 3 | 0 | 3 | 1 |
| Case 95 | 14 | 23,009,999  | 32,589,339  | 2 | 0 | 2 | 1 |
| Case 95 | 14 | 32,592,200  | 32,815,477  | 1 | 0 | 1 | 0 |
| Case 95 | 14 | 32,815,701  | 53,023,847  | 2 | 0 | 2 | 1 |
| Case 95 | 14 | 53,027,908  | 53,119,875  | 1 | 0 | 1 | 0 |
| Case 95 | 14 | 53,124,867  | 68,911,554  | 2 | 0 | 2 | 1 |
| Case 95 | 14 | 68,912,686  | 69,526,307  | 3 | 0 | 3 | 1 |
| Case 95 | 14 | 69,533,837  | 75,321,408  | 2 | 0 | 2 | 1 |
| Case 95 | 14 | 75,321,843  | 75,583,942  | 3 | 0 | 3 | 1 |
| Case 95 | 14 | 75,587,014  | 100,581,068 | 2 | 0 | 2 | 1 |
| Case 95 | 14 | 100,587,813 | 101,070,535 | 4 | 0 | 4 | 1 |
| Case 95 | 14 | 101,071,722 | 103,520,762 | 2 | 0 | 2 | 1 |
| Case 95 | 14 | 103,526,930 | 103,811,181 | 4 | 0 | 4 | 1 |
| Case 95 | 14 | 103,811,249 | 107,287,663 | 2 | 0 | 2 | 1 |
| Case 95 | 15 | 20,034,919  | 43,485,930  | 1 | 1 | 2 | 0 |
| Case 95 | 15 | 43,489,532  | 44,100,342  | 2 | 1 | 3 | 0 |
| Case 95 | 15 | 44,102,010  | 57,459,278  | 1 | 1 | 2 | 0 |
| Case 95 | 15 | 57,484,419  | 57,823,404  | 2 | 1 | 3 | 0 |
| Case 95 | 15 | 57,824,330  | 70,407,014  | 1 | 1 | 2 | 0 |
| Case 95 | 15 | 70,407,822  | 70,646,062  | 2 | 1 | 3 | 0 |
| Case 95 | 15 | 70,666,282  | 74,075,536  | 1 | 1 | 2 | 0 |
| Case 95 | 15 | 74,075,608  | 74,413,634  | 2 | 1 | 3 | 0 |
| Case 95 | 15 | 74,419,809  | 85,360,319  | 1 | 1 | 2 | 0 |
| Case 95 | 15 | 85,366,575  | 85,568,434  | 2 | 1 | 3 | 0 |
| Case 95 | 15 | 85,568,535  | 90,319,095  | 1 | 1 | 2 | 0 |
| Case 95 | 15 | 90,320,381  | 90,447,127  | 2 | 1 | 3 | 0 |
| Case 95 | 15 | 90,447,946  | 90,915,666  | 3 | 1 | 4 | 0 |
| Case 95 | 15 | 90,924,702  | 91,198,415  | 4 | 1 | 5 | 0 |
| Case 95 | 15 | 91,202,504  | 93,603,525  | 3 | 1 | 4 | 0 |
| Case 95 | 15 | 93,605,090  | 101,858,536 | 2 | 1 | 3 | 0 |
| Case 95 | 15 | 101,862,163 | 102,160,040 | 3 | 1 | 4 | 0 |
| Case 95 | 15 | 102,165,387 | 102,461,162 | 2 | 1 | 3 | 0 |
| Case 95 | 16 | 88,165      | 1,081,348   | 1 | 0 | 1 | 0 |
| Case 95 | 16 | 1,085,393   | 35,285,582  | 2 | 0 | 2 | 1 |
| Case 95 | 16 | 46,450,037  | 69,006,797  | 2 | 0 | 2 | 1 |
| Case 95 | 16 | 69,007,951  | 69,238,164  | 4 | 0 | 4 | 1 |
| Case 95 | 16 | 69,267,209  | 71,902,142  | 2 | 0 | 2 | 1 |
| Case 95 | 16 | 71,917,058  | 72,234,472  | 3 | 0 | 3 | 1 |
| Case 95 | 16 | 72,243,624  | 75,377,750  | 2 | 0 | 2 | 1 |
| Case 95 | 16 | 75,377,933  | 75,655,049  | 3 | 0 | 3 | 1 |
| Case 95 | 16 | 75,657,221  | 78,265,836  | 2 | 0 | 2 | 1 |
| Case 95 | 16 | 78,267,097  | 78,332,721  | 0 | 0 | 0 | 0 |
| Case 95 | 16 | 78,338,118  | 79,158,182  | 2 | 0 | 2 | 1 |
| Case 95 | 16 | 79,158,698  | 79,427,879  | 4 | 0 | 4 | 1 |
| Case 95 | 16 | 79,434,027  | 84,575,823  | 2 | 0 | 2 | 1 |
| Case 95 | 16 | 84,576,883  | 84,793,348  | 4 | 0 | 4 | 1 |
| Case 95 | 16 | 84,793,502  | 87,493,737  | 2 | 0 | 2 | 1 |
| Case 95 | 16 | 87,504,998  | 87,585,814  | 4 | 0 | 4 | 1 |
| Case 95 | 16 | 87,586,557  | 90,274,695  | 2 | 0 | 2 | 1 |
| Case 95 | 17 | 11,885      | 4,391,201   | 2 | 0 | 2 | 1 |
| Case 95 | 17 | 4,393,498   | 4,726,143   | 3 | 0 | 3 | 1 |
| Case 95 | 17 | 4,739,161   | 22,242,355  | 2 | 0 | 2 | 1 |

|         |    |            |            |   |   |    |   |
|---------|----|------------|------------|---|---|----|---|
| Case 95 | 17 | 25,268,142 | 25,268,142 | 2 | 0 | 2  | 1 |
| Case 95 | 17 | 25,295,032 | 26,823,570 | 2 | 1 | 3  | 0 |
| Case 95 | 17 | 26,824,156 | 27,361,383 | 3 | 0 | 3  | 1 |
| Case 95 | 17 | 27,376,551 | 27,620,815 | 2 | 1 | 3  | 0 |
| Case 95 | 17 | 27,621,034 | 29,376,293 | 2 | 0 | 2  | 1 |
| Case 95 | 17 | 29,393,104 | 29,734,707 | 2 | 1 | 3  | 0 |
| Case 95 | 17 | 29,738,601 | 37,711,565 | 2 | 0 | 2  | 1 |
| Case 95 | 17 | 37,745,979 | 38,023,441 | 5 | 0 | 5  | 1 |
| Case 95 | 17 | 38,025,417 | 38,126,757 | 7 | 0 | 7  | 1 |
| Case 95 | 17 | 38,126,847 | 38,223,403 | 4 | 0 | 4  | 1 |
| Case 95 | 17 | 38,231,376 | 38,612,749 | 2 | 1 | 3  | 0 |
| Case 95 | 17 | 38,616,713 | 38,793,798 | 3 | 2 | 5  | 0 |
| Case 95 | 17 | 38,795,943 | 39,914,383 | 2 | 1 | 3  | 0 |
| Case 95 | 17 | 39,919,366 | 40,034,781 | 2 | 0 | 2  | 1 |
| Case 95 | 17 | 40,039,454 | 40,494,902 | 3 | 0 | 3  | 1 |
| Case 95 | 17 | 40,498,273 | 41,470,623 | 2 | 0 | 2  | 1 |
| Case 95 | 17 | 41,470,683 | 46,747,019 | 2 | 1 | 3  | 0 |
| Case 95 | 17 | 46,753,824 | 48,456,251 | 2 | 0 | 2  | 1 |
| Case 95 | 17 | 48,456,520 | 48,868,073 | 4 | 0 | 4  | 1 |
| Case 95 | 17 | 48,868,181 | 48,991,357 | 3 | 0 | 3  | 1 |
| Case 95 | 17 | 48,994,272 | 58,432,486 | 2 | 0 | 2  | 1 |
| Case 95 | 17 | 58,439,018 | 64,545,922 | 2 | 2 | 4  | 0 |
| Case 95 | 17 | 64,546,244 | 68,320,444 | 2 | 1 | 3  | 0 |
| Case 95 | 17 | 68,326,338 | 69,616,366 | 2 | 2 | 4  | 0 |
| Case 95 | 17 | 69,617,574 | 74,636,253 | 2 | 0 | 2  | 1 |
| Case 95 | 17 | 74,637,881 | 77,672,725 | 1 | 0 | 1  | 0 |
| Case 95 | 17 | 77,674,058 | 78,176,159 | 2 | 0 | 2  | 1 |
| Case 95 | 17 | 78,177,668 | 79,872,241 | 1 | 0 | 1  | 0 |
| Case 95 | 17 | 79,872,316 | 80,494,243 | 3 | 0 | 3  | 1 |
| Case 95 | 17 | 80,496,771 | 81,060,040 | 1 | 0 | 1  | 0 |
| Case 95 | 18 | 87,505     | 2,802,615  | 2 | 1 | 3  | 0 |
| Case 95 | 18 | 2,804,129  | 3,188,778  | 2 | 2 | 4  | 0 |
| Case 95 | 18 | 3,188,857  | 3,594,718  | 2 | 1 | 3  | 0 |
| Case 95 | 18 | 3,597,525  | 3,874,336  | 3 | 2 | 5  | 0 |
| Case 95 | 18 | 3,875,929  | 10,918,243 | 2 | 1 | 3  | 0 |
| Case 95 | 18 | 10,919,330 | 15,375,878 | 1 | 1 | 2  | 0 |
| Case 95 | 18 | 18,520,354 | 19,414,759 | 1 | 1 | 2  | 0 |
| Case 95 | 18 | 19,423,155 | 19,786,854 | 4 | 0 | 4  | 1 |
| Case 95 | 18 | 19,788,303 | 46,465,665 | 3 | 0 | 3  | 1 |
| Case 95 | 18 | 46,468,251 | 46,770,186 | 4 | 0 | 4  | 1 |
| Case 95 | 18 | 46,786,058 | 67,599,516 | 1 | 0 | 1  | 0 |
| Case 95 | 18 | 67,600,991 | 68,399,298 | 3 | 0 | 3  | 1 |
| Case 95 | 18 | 68,410,141 | 78,015,180 | 1 | 0 | 1  | 0 |
| Case 95 | 19 | 260,912    | 504,948    | 2 | 0 | 2  | 1 |
| Case 95 | 19 | 506,712    | 1,171,020  | 3 | 0 | 3  | 1 |
| Case 95 | 19 | 1,181,717  | 2,078,488  | 2 | 0 | 2  | 1 |
| Case 95 | 19 | 2,078,502  | 2,491,658  | 3 | 0 | 3  | 1 |
| Case 95 | 19 | 2,491,934  | 14,199,788 | 2 | 0 | 2  | 1 |
| Case 95 | 19 | 14,199,924 | 14,652,278 | 3 | 0 | 3  | 1 |
| Case 95 | 19 | 14,655,865 | 24,629,285 | 2 | 0 | 2  | 1 |
| Case 95 | 19 | 27,732,159 | 30,276,911 | 2 | 0 | 2  | 1 |
| Case 95 | 19 | 30,286,822 | 30,478,431 | 9 | 2 | 11 | 0 |
| Case 95 | 19 | 30,478,556 | 35,199,555 | 2 | 0 | 2  | 1 |
| Case 95 | 19 | 35,219,548 | 36,987,525 | 2 | 1 | 3  | 0 |
| Case 95 | 19 | 37,004,938 | 38,968,461 | 2 | 0 | 2  | 1 |
| Case 95 | 19 | 38,973,933 | 39,135,874 | 7 | 1 | 8  | 0 |
| Case 95 | 19 | 39,138,149 | 39,980,444 | 2 | 0 | 2  | 1 |
| Case 95 | 19 | 39,986,005 | 40,194,767 | 7 | 0 | 7  | 1 |
| Case 95 | 19 | 40,195,183 | 40,364,428 | 6 | 1 | 7  | 0 |
| Case 95 | 19 | 40,392,569 | 41,963,749 | 2 | 0 | 2  | 1 |
| Case 95 | 19 | 41,983,822 | 44,043,448 | 3 | 0 | 3  | 1 |

|         |    |             |             |   |   |    |   |
|---------|----|-------------|-------------|---|---|----|---|
| Case 95 | 19 | 44,046,728  | 47,768,204  | 2 | 0 | 2  | 1 |
| Case 95 | 19 | 47,773,930  | 48,830,797  | 2 | 2 | 4  | 0 |
| Case 95 | 19 | 48,832,701  | 50,563,899  | 2 | 0 | 2  | 1 |
| Case 95 | 19 | 50,591,699  | 50,967,760  | 8 | 0 | 8  | 1 |
| Case 95 | 19 | 50,969,325  | 51,159,571  | 2 | 0 | 2  | 1 |
| Case 95 | 19 | 51,161,088  | 51,186,081  | 9 | 1 | 10 | 0 |
| Case 95 | 19 | 51,186,595  | 54,622,488  | 2 | 0 | 2  | 1 |
| Case 95 | 19 | 54,623,549  | 54,660,649  | 9 | 1 | 10 | 0 |
| Case 95 | 19 | 54,662,043  | 54,707,276  | 8 | 1 | 9  | 0 |
| Case 95 | 19 | 54,711,258  | 59,097,160  | 2 | 0 | 2  | 1 |
| Case 95 | 20 | 63,244      | 4,041,451   | 2 | 1 | 3  | 0 |
| Case 95 | 20 | 4,045,738   | 4,281,673   | 2 | 2 | 4  | 0 |
| Case 95 | 20 | 4,285,493   | 10,769,877  | 2 | 1 | 3  | 0 |
| Case 95 | 20 | 10,773,298  | 11,155,202  | 3 | 1 | 4  | 0 |
| Case 95 | 20 | 11,156,529  | 17,641,928  | 2 | 1 | 3  | 0 |
| Case 95 | 20 | 17,660,743  | 17,984,594  | 3 | 1 | 4  | 0 |
| Case 95 | 20 | 17,992,979  | 22,266,006  | 2 | 1 | 3  | 0 |
| Case 95 | 20 | 22,267,058  | 22,609,101  | 4 | 1 | 5  | 0 |
| Case 95 | 20 | 22,610,804  | 26,293,985  | 2 | 1 | 3  | 0 |
| Case 95 | 20 | 29,425,357  | 31,838,520  | 2 | 1 | 3  | 0 |
| Case 95 | 20 | 31,839,058  | 33,110,175  | 3 | 1 | 4  | 0 |
| Case 95 | 20 | 33,110,846  | 34,806,861  | 4 | 1 | 5  | 0 |
| Case 95 | 20 | 34,807,711  | 48,156,236  | 2 | 1 | 3  | 0 |
| Case 95 | 20 | 48,158,905  | 48,489,341  | 3 | 1 | 4  | 0 |
| Case 95 | 20 | 48,491,258  | 60,763,397  | 2 | 1 | 3  | 0 |
| Case 95 | 20 | 60,765,422  | 60,992,402  | 3 | 1 | 4  | 0 |
| Case 95 | 20 | 61,003,031  | 62,948,788  | 2 | 1 | 3  | 0 |
| Case 95 | 21 | 10,827,533  | 10,971,337  | 2 | 1 | 3  | 0 |
| Case 95 | 21 | 14,368,320  | 42,832,541  | 2 | 1 | 3  | 0 |
| Case 95 | 21 | 42,832,638  | 43,114,842  | 3 | 1 | 4  | 0 |
| Case 95 | 21 | 43,120,120  | 45,356,073  | 2 | 1 | 3  | 0 |
| Case 95 | 21 | 45,356,487  | 45,783,999  | 2 | 0 | 2  | 1 |
| Case 95 | 21 | 45,784,090  | 46,818,782  | 2 | 1 | 3  | 0 |
| Case 95 | 21 | 46,820,082  | 46,837,709  | 4 | 2 | 6  | 0 |
| Case 95 | 21 | 46,839,625  | 48,100,155  | 2 | 1 | 3  | 0 |
| Case 95 | 22 | 16,114,244  | 23,257,051  | 2 | 1 | 3  | 0 |
| Case 95 | 22 | 23,258,231  | 24,789,632  | 3 | 1 | 4  | 0 |
| Case 95 | 22 | 24,802,564  | 27,144,107  | 2 | 1 | 3  | 0 |
| Case 95 | 22 | 27,149,053  | 29,750,817  | 1 | 1 | 2  | 0 |
| Case 95 | 22 | 29,755,888  | 29,983,138  | 3 | 1 | 4  | 0 |
| Case 95 | 22 | 30,002,603  | 30,489,945  | 4 | 1 | 5  | 0 |
| Case 95 | 22 | 30,494,371  | 30,672,420  | 3 | 1 | 4  | 0 |
| Case 95 | 22 | 30,673,368  | 31,320,322  | 2 | 1 | 3  | 0 |
| Case 95 | 22 | 31,321,725  | 38,155,506  | 1 | 1 | 2  | 0 |
| Case 95 | 22 | 38,157,805  | 38,627,339  | 2 | 1 | 3  | 0 |
| Case 95 | 22 | 38,628,306  | 46,178,183  | 1 | 1 | 2  | 0 |
| Case 95 | 22 | 46,182,756  | 46,362,396  | 2 | 1 | 3  | 0 |
| Case 95 | 22 | 46,363,739  | 51,195,728  | 1 | 1 | 2  | 0 |
| Case 95 | X  | 2,700,157   | 53,569,407  | 3 | 2 | 5  | 0 |
| Case 95 | X  | 53,574,760  | 58,488,110  | 2 | 0 | 2  | 1 |
| Case 95 | X  | 61,694,576  | 62,150,601  | 2 | 0 | 2  | 1 |
| Case 95 | X  | 62,223,813  | 110,554,835 | 3 | 0 | 3  | 1 |
| Case 95 | X  | 110,574,222 | 120,999,907 | 3 | 1 | 4  | 0 |
| Case 95 | X  | 121,004,659 | 121,203,460 | 2 | 1 | 3  | 0 |
| Case 95 | X  | 121,203,926 | 154,898,561 | 3 | 1 | 4  | 0 |
| Case 96 | 1  | 82,154      | 72,628,347  | 2 | 1 | 3  | 0 |
| Case 96 | 1  | 72,629,795  | 92,865,160  | 3 | 1 | 4  | 0 |
| Case 96 | 1  | 92,882,554  | 121,346,616 | 2 | 1 | 3  | 0 |
| Case 96 | 1  | 142,649,718 | 249,218,992 | 2 | 1 | 3  | 0 |
| Case 96 | 2  | 18,674      | 86,005,932  | 2 | 1 | 3  | 0 |
| Case 96 | 2  | 86,010,243  | 88,480,334  | 3 | 1 | 4  | 0 |

|         |   |             |             |   |   |   |   |
|---------|---|-------------|-------------|---|---|---|---|
| Case 96 | 2 | 88,482,262  | 92,081,640  | 2 | 1 | 3 | 0 |
| Case 96 | 2 | 95,429,424  | 121,416,218 | 2 | 1 | 3 | 0 |
| Case 96 | 2 | 121,431,691 | 167,760,249 | 1 | 1 | 2 | 0 |
| Case 96 | 2 | 167,760,318 | 239,369,790 | 2 | 1 | 3 | 0 |
| Case 96 | 2 | 239,400,430 | 242,962,791 | 2 | 2 | 4 | 0 |
| Case 96 | 2 | 242,971,871 | 243,048,760 | 3 | 2 | 5 | 0 |
| Case 96 | 3 | 61,495      | 60,390,846  | 2 | 1 | 3 | 0 |
| Case 96 | 3 | 60,396,850  | 60,604,489  | 1 | 0 | 1 | 0 |
| Case 96 | 3 | 60,607,896  | 76,596,865  | 2 | 1 | 3 | 0 |
| Case 96 | 3 | 76,602,394  | 79,522,372  | 3 | 1 | 4 | 0 |
| Case 96 | 3 | 79,533,095  | 87,064,799  | 2 | 1 | 3 | 0 |
| Case 96 | 3 | 87,065,067  | 90,442,925  | 1 | 1 | 2 | 0 |
| Case 96 | 3 | 93,537,290  | 93,545,404  | 1 | 1 | 2 | 0 |
| Case 96 | 3 | 93,546,445  | 141,568,628 | 2 | 1 | 3 | 0 |
| Case 96 | 3 | 141,569,773 | 197,838,262 | 3 | 1 | 4 | 0 |
| Case 96 | 4 | 71,566      | 1,045,265   | 1 | 1 | 2 | 0 |
| Case 96 | 4 | 1,052,401   | 28,003,277  | 2 | 1 | 3 | 0 |
| Case 96 | 4 | 28,005,075  | 36,562,966  | 1 | 1 | 2 | 0 |
| Case 96 | 4 | 36,572,626  | 39,548,112  | 2 | 1 | 3 | 0 |
| Case 96 | 4 | 39,557,864  | 40,162,971  | 1 | 1 | 2 | 0 |
| Case 96 | 4 | 40,165,305  | 49,620,898  | 2 | 1 | 3 | 0 |
| Case 96 | 4 | 52,697,856  | 58,573,210  | 2 | 1 | 3 | 0 |
| Case 96 | 4 | 58,586,920  | 67,878,373  | 1 | 1 | 2 | 0 |
| Case 96 | 4 | 67,884,593  | 72,751,722  | 2 | 1 | 3 | 0 |
| Case 96 | 4 | 72,756,782  | 72,822,599  | 2 | 0 | 2 | 1 |
| Case 96 | 4 | 72,834,313  | 90,826,760  | 2 | 1 | 3 | 0 |
| Case 96 | 4 | 90,827,466  | 137,704,034 | 1 | 1 | 2 | 0 |
| Case 96 | 4 | 137,706,263 | 155,995,695 | 2 | 1 | 3 | 0 |
| Case 96 | 4 | 156,002,908 | 166,850,443 | 1 | 1 | 2 | 0 |
| Case 96 | 4 | 166,854,139 | 175,876,473 | 2 | 1 | 3 | 0 |
| Case 96 | 4 | 175,878,038 | 190,963,766 | 1 | 1 | 2 | 0 |
| Case 96 | 5 | 38,139      | 15,678,556  | 3 | 2 | 5 | 0 |
| Case 96 | 5 | 15,680,744  | 17,746,787  | 2 | 2 | 4 | 0 |
| Case 96 | 5 | 17,761,225  | 36,110,716  | 3 | 2 | 5 | 0 |
| Case 96 | 5 | 36,122,834  | 46,399,093  | 2 | 2 | 4 | 0 |
| Case 96 | 5 | 49,457,282  | 57,894,922  | 3 | 1 | 4 | 0 |
| Case 96 | 5 | 57,905,474  | 68,569,957  | 3 | 0 | 3 | 1 |
| Case 96 | 5 | 68,575,830  | 72,493,266  | 2 | 1 | 3 | 0 |
| Case 96 | 5 | 72,496,179  | 106,957,027 | 2 | 0 | 2 | 1 |
| Case 96 | 5 | 106,958,958 | 121,064,424 | 2 | 1 | 3 | 0 |
| Case 96 | 5 | 121,064,897 | 129,408,800 | 2 | 0 | 2 | 1 |
| Case 96 | 5 | 129,412,126 | 135,489,435 | 2 | 1 | 3 | 0 |
| Case 96 | 5 | 135,494,074 | 136,399,748 | 3 | 1 | 4 | 0 |
| Case 96 | 5 | 136,402,958 | 139,276,748 | 2 | 1 | 3 | 0 |
| Case 96 | 5 | 139,290,054 | 140,166,534 | 3 | 0 | 3 | 1 |
| Case 96 | 5 | 140,166,686 | 142,024,256 | 2 | 1 | 3 | 0 |
| Case 96 | 5 | 142,030,342 | 144,943,205 | 3 | 1 | 4 | 0 |
| Case 96 | 5 | 144,944,054 | 180,693,127 | 3 | 0 | 3 | 1 |
| Case 96 | 6 | 108,666     | 20,940,379  | 3 | 0 | 3 | 1 |
| Case 96 | 6 | 20,943,232  | 21,277,763  | 2 | 0 | 2 | 1 |
| Case 96 | 6 | 21,279,870  | 30,983,263  | 3 | 0 | 3 | 1 |
| Case 96 | 6 | 30,983,326  | 30,998,742  | 2 | 0 | 2 | 1 |
| Case 96 | 6 | 30,998,879  | 31,354,560  | 3 | 0 | 3 | 1 |
| Case 96 | 6 | 31,354,595  | 31,356,574  | 2 | 0 | 2 | 1 |
| Case 96 | 6 | 31,360,255  | 31,453,640  | 0 | 0 | 0 | 0 |
| Case 96 | 6 | 31,456,567  | 54,452,797  | 3 | 0 | 3 | 1 |
| Case 96 | 6 | 54,458,991  | 58,497,182  | 2 | 0 | 2 | 1 |
| Case 96 | 6 | 58,504,614  | 58,752,089  | 1 | 1 | 2 | 0 |
| Case 96 | 6 | 61,891,118  | 69,629,187  | 1 | 1 | 2 | 0 |
| Case 96 | 6 | 69,631,411  | 92,208,995  | 2 | 1 | 3 | 0 |
| Case 96 | 6 | 92,210,391  | 104,483,487 | 1 | 1 | 2 | 0 |

|         |    |             |             |   |   |    |   |
|---------|----|-------------|-------------|---|---|----|---|
| Case 96 | 6  | 104,484,800 | 170,980,171 | 2 | 1 | 3  | 0 |
| Case 96 | 7  | 44,935      | 38,153,444  | 2 | 1 | 3  | 0 |
| Case 96 | 7  | 38,155,563  | 38,383,243  | 2 | 2 | 4  | 0 |
| Case 96 | 7  | 38,385,938  | 58,019,061  | 2 | 1 | 3  | 0 |
| Case 96 | 7  | 61,056,053  | 111,183,610 | 2 | 1 | 3  | 0 |
| Case 96 | 7  | 111,199,771 | 159,119,486 | 2 | 0 | 2  | 1 |
| Case 96 | 8  | 164,984     | 5,393,748   | 1 | 1 | 2  | 0 |
| Case 96 | 8  | 5,393,862   | 5,529,622   | 6 | 0 | 6  | 1 |
| Case 96 | 8  | 5,530,770   | 5,875,524   | 7 | 1 | 8  | 0 |
| Case 96 | 8  | 5,883,129   | 7,308,674   | 6 | 0 | 6  | 1 |
| Case 96 | 8  | 7,308,691   | 9,685,362   | 4 | 1 | 5  | 0 |
| Case 96 | 8  | 9,688,094   | 10,121,022  | 2 | 0 | 2  | 1 |
| Case 96 | 8  | 10,122,315  | 11,141,330  | 4 | 1 | 5  | 0 |
| Case 96 | 8  | 11,142,437  | 12,483,094  | 9 | 0 | 9  | 1 |
| Case 96 | 8  | 12,494,265  | 13,152,212  | 6 | 0 | 6  | 1 |
| Case 96 | 8  | 13,153,938  | 14,860,953  | 7 | 1 | 8  | 0 |
| Case 96 | 8  | 14,861,409  | 15,491,989  | 7 | 0 | 7  | 1 |
| Case 96 | 8  | 15,493,417  | 20,381,833  | 4 | 1 | 5  | 0 |
| Case 96 | 8  | 20,390,625  | 20,521,191  | 6 | 1 | 7  | 0 |
| Case 96 | 8  | 20,525,787  | 22,175,086  | 4 | 1 | 5  | 0 |
| Case 96 | 8  | 22,188,330  | 22,332,544  | 5 | 1 | 6  | 0 |
| Case 96 | 8  | 22,333,014  | 23,602,802  | 3 | 1 | 4  | 0 |
| Case 96 | 8  | 23,607,733  | 26,001,404  | 2 | 1 | 3  | 0 |
| Case 96 | 8  | 26,002,358  | 27,022,315  | 4 | 1 | 5  | 0 |
| Case 96 | 8  | 27,030,123  | 27,220,310  | 5 | 0 | 5  | 1 |
| Case 96 | 8  | 27,226,790  | 27,690,612  | 6 | 0 | 6  | 1 |
| Case 96 | 8  | 27,690,627  | 28,146,753  | 5 | 0 | 5  | 1 |
| Case 96 | 8  | 28,146,771  | 29,473,431  | 4 | 1 | 5  | 0 |
| Case 96 | 8  | 29,478,948  | 31,469,479  | 5 | 1 | 6  | 0 |
| Case 96 | 8  | 31,474,141  | 32,695,646  | 4 | 1 | 5  | 0 |
| Case 96 | 8  | 32,696,905  | 33,461,989  | 5 | 1 | 6  | 0 |
| Case 96 | 8  | 33,462,084  | 43,791,691  | 2 | 1 | 3  | 0 |
| Case 96 | 8  | 46,886,735  | 52,101,444  | 2 | 1 | 3  | 0 |
| Case 96 | 8  | 52,120,526  | 52,155,807  | 1 | 1 | 2  | 0 |
| Case 96 | 8  | 52,157,579  | 112,753,418 | 2 | 1 | 3  | 0 |
| Case 96 | 8  | 112,758,125 | 137,338,230 | 3 | 1 | 4  | 0 |
| Case 96 | 8  | 137,340,282 | 138,116,658 | 3 | 0 | 3  | 1 |
| Case 96 | 8  | 138,121,678 | 146,293,414 | 3 | 1 | 4  | 0 |
| Case 96 | 9  | 46,587      | 46,944,322  | 2 | 0 | 2  | 1 |
| Case 96 | 9  | 65,629,772  | 76,098,252  | 2 | 0 | 2  | 1 |
| Case 96 | 9  | 76,105,546  | 78,407,484  | 2 | 1 | 3  | 0 |
| Case 96 | 9  | 78,412,423  | 83,583,372  | 2 | 0 | 2  | 1 |
| Case 96 | 9  | 83,587,426  | 85,417,267  | 2 | 1 | 3  | 0 |
| Case 96 | 9  | 85,421,474  | 99,427,491  | 2 | 0 | 2  | 1 |
| Case 96 | 9  | 99,435,093  | 141,066,491 | 2 | 1 | 3  | 0 |
| Case 96 | 10 | 98,087      | 39,097,912  | 2 | 1 | 3  | 0 |
| Case 96 | 10 | 42,436,301  | 62,869,980  | 2 | 1 | 3  | 0 |
| Case 96 | 10 | 62,896,874  | 66,263,070  | 3 | 2 | 5  | 0 |
| Case 96 | 10 | 66,267,858  | 66,483,216  | 7 | 1 | 8  | 0 |
| Case 96 | 10 | 66,484,138  | 66,610,911  | 8 | 1 | 9  | 0 |
| Case 96 | 10 | 66,612,353  | 66,877,815  | 7 | 1 | 8  | 0 |
| Case 96 | 10 | 66,878,139  | 67,363,095  | 8 | 1 | 9  | 0 |
| Case 96 | 10 | 67,379,181  | 69,004,247  | 4 | 2 | 6  | 0 |
| Case 96 | 10 | 69,005,693  | 73,154,073  | 2 | 2 | 4  | 0 |
| Case 96 | 10 | 73,158,678  | 75,424,174  | 5 | 1 | 6  | 0 |
| Case 96 | 10 | 75,477,298  | 75,708,906  | 6 | 0 | 6  | 1 |
| Case 96 | 10 | 75,727,098  | 76,636,026  | 9 | 1 | 10 | 0 |
| Case 96 | 10 | 76,642,997  | 78,176,479  | 7 | 1 | 8  | 0 |
| Case 96 | 10 | 78,177,534  | 78,472,104  | 8 | 1 | 9  | 0 |
| Case 96 | 10 | 78,482,228  | 79,969,839  | 7 | 1 | 8  | 0 |
| Case 96 | 10 | 79,970,100  | 80,222,790  | 6 | 0 | 6  | 1 |

|         |    |             |             |    |   |    |   |
|---------|----|-------------|-------------|----|---|----|---|
| Case 96 | 10 | 80,223,615  | 81,145,266  | 7  | 0 | 7  | 1 |
| Case 96 | 10 | 81,145,535  | 135,477,883 | 2  | 0 | 2  | 1 |
| Case 96 | 11 | 193,146     | 50,447,311  | 2  | 1 | 3  | 0 |
| Case 96 | 11 | 50,461,838  | 51,379,204  | 1  | 1 | 2  | 0 |
| Case 96 | 11 | 51,383,999  | 51,591,253  | 2  | 1 | 3  | 0 |
| Case 96 | 11 | 54,794,237  | 68,178,909  | 2  | 1 | 3  | 0 |
| Case 96 | 11 | 68,181,248  | 68,205,997  | 8  | 0 | 8  | 1 |
| Case 96 | 11 | 68,206,058  | 68,548,202  | 9  | 0 | 9  | 1 |
| Case 96 | 11 | 68,549,546  | 69,326,308  | 8  | 0 | 8  | 1 |
| Case 96 | 11 | 69,328,764  | 69,553,604  | 9  | 0 | 9  | 1 |
| Case 96 | 11 | 69,556,722  | 69,592,814  | 7  | 0 | 7  | 1 |
| Case 96 | 11 | 69,596,523  | 85,470,893  | 2  | 1 | 3  | 0 |
| Case 96 | 11 | 85,473,248  | 102,713,627 | 1  | 1 | 2  | 0 |
| Case 96 | 11 | 102,714,193 | 118,393,556 | 2  | 1 | 3  | 0 |
| Case 96 | 11 | 118,393,856 | 118,944,046 | 1  | 1 | 2  | 0 |
| Case 96 | 11 | 118,947,634 | 134,934,063 | 2  | 1 | 3  | 0 |
| Case 96 | 12 | 191,619     | 713,285     | 2  | 1 | 3  | 0 |
| Case 96 | 12 | 714,224     | 18,848,131  | 1  | 1 | 2  | 0 |
| Case 96 | 12 | 18,849,084  | 20,122,534  | 9  | 0 | 9  | 1 |
| Case 96 | 12 | 20,124,137  | 20,337,594  | 11 | 0 | 11 | 1 |
| Case 96 | 12 | 20,338,941  | 20,398,906  | 9  | 1 | 10 | 0 |
| Case 96 | 12 | 20,403,211  | 24,093,764  | 4  | 1 | 5  | 0 |
| Case 96 | 12 | 24,099,662  | 25,240,480  | 8  | 0 | 8  | 1 |
| Case 96 | 12 | 25,241,297  | 26,243,826  | 10 | 0 | 10 | 1 |
| Case 96 | 12 | 26,244,644  | 28,237,294  | 8  | 0 | 8  | 1 |
| Case 96 | 12 | 28,237,731  | 31,105,270  | 3  | 1 | 4  | 0 |
| Case 96 | 12 | 31,105,440  | 32,383,658  | 2  | 1 | 3  | 0 |
| Case 96 | 12 | 32,386,414  | 33,517,984  | 3  | 1 | 4  | 0 |
| Case 96 | 12 | 33,529,062  | 34,853,011  | 2  | 1 | 3  | 0 |
| Case 96 | 12 | 37,876,400  | 118,414,697 | 2  | 1 | 3  | 0 |
| Case 96 | 12 | 118,415,758 | 118,454,666 | 1  | 1 | 2  | 0 |
| Case 96 | 12 | 118,454,669 | 133,810,935 | 2  | 1 | 3  | 0 |
| Case 96 | 13 | 19,058,717  | 115,103,529 | 3  | 0 | 3  | 1 |
| Case 96 | 14 | 19,280,733  | 20,819,248  | 1  | 1 | 2  | 0 |
| Case 96 | 14 | 20,820,404  | 107,287,663 | 2  | 1 | 3  | 0 |
| Case 96 | 15 | 20,034,919  | 20,191,741  | 1  | 0 | 1  | 0 |
| Case 96 | 15 | 20,192,086  | 102,461,162 | 2  | 0 | 2  | 1 |
| Case 96 | 16 | 88,165      | 193,586     | 3  | 0 | 3  | 1 |
| Case 96 | 16 | 194,845     | 6,238,959   | 2  | 0 | 2  | 1 |
| Case 96 | 16 | 6,241,183   | 24,427,148  | 2  | 1 | 3  | 0 |
| Case 96 | 16 | 24,429,827  | 25,360,547  | 2  | 0 | 2  | 1 |
| Case 96 | 16 | 25,373,624  | 26,505,606  | 2  | 1 | 3  | 0 |
| Case 96 | 16 | 26,507,054  | 27,895,382  | 2  | 0 | 2  | 1 |
| Case 96 | 16 | 27,896,218  | 35,285,582  | 2  | 1 | 3  | 0 |
| Case 96 | 16 | 46,450,037  | 60,146,143  | 2  | 1 | 3  | 0 |
| Case 96 | 16 | 60,161,902  | 64,553,333  | 2  | 0 | 2  | 1 |
| Case 96 | 16 | 64,554,640  | 82,741,256  | 2  | 1 | 3  | 0 |
| Case 96 | 16 | 82,751,864  | 83,991,313  | 2  | 0 | 2  | 1 |
| Case 96 | 16 | 83,992,895  | 90,274,695  | 2  | 1 | 3  | 0 |
| Case 96 | 17 | 11,885      | 22,242,355  | 2  | 0 | 2  | 1 |
| Case 96 | 17 | 25,268,142  | 41,433,660  | 2  | 0 | 2  | 1 |
| Case 96 | 17 | 41,445,145  | 81,060,040  | 3  | 0 | 3  | 1 |
| Case 96 | 18 | 87,505      | 15,375,878  | 1  | 1 | 2  | 0 |
| Case 96 | 18 | 18,520,354  | 18,546,896  | 1  | 1 | 2  | 0 |
| Case 96 | 18 | 18,550,415  | 32,982,350  | 2  | 1 | 3  | 0 |
| Case 96 | 18 | 32,986,600  | 76,773,973  | 1  | 1 | 2  | 0 |
| Case 96 | 18 | 76,783,352  | 78,015,180  | 2  | 1 | 3  | 0 |
| Case 96 | 19 | 260,912     | 11,238,731  | 2  | 0 | 2  | 1 |
| Case 96 | 19 | 11,238,975  | 21,666,759  | 3  | 0 | 3  | 1 |
| Case 96 | 19 | 21,686,650  | 21,771,069  | 2  | 0 | 2  | 1 |
| Case 96 | 19 | 21,775,371  | 24,490,299  | 3  | 0 | 3  | 1 |



|         |    |             |             |   |   |   |   |
|---------|----|-------------|-------------|---|---|---|---|
| Case 96 | 19 | 24,518,609  | 24,629,285  | 2 | 0 | 2 | 1 |
| Case 96 | 19 | 27,732,159  | 59,097,160  | 2 | 0 | 2 | 1 |
| Case 96 | 20 | 63,244      | 14,872,313  | 2 | 2 | 4 | 0 |
| Case 96 | 20 | 14,877,654  | 14,995,343  | 2 | 1 | 3 | 0 |
| Case 96 | 20 | 15,007,064  | 26,224,651  | 2 | 2 | 4 | 0 |
| Case 96 | 20 | 26,225,145  | 26,293,985  | 2 | 1 | 3 | 0 |
| Case 96 | 20 | 29,425,357  | 40,359,654  | 2 | 1 | 3 | 0 |
| Case 96 | 20 | 40,360,853  | 62,948,788  | 2 | 2 | 4 | 0 |
| Case 96 | 21 | 10,827,533  | 10,971,337  | 2 | 1 | 3 | 0 |
| Case 96 | 21 | 14,368,320  | 16,495,307  | 2 | 1 | 3 | 0 |
| Case 96 | 21 | 16,510,753  | 20,028,118  | 1 | 1 | 2 | 0 |
| Case 96 | 21 | 20,030,395  | 25,335,327  | 1 | 0 | 1 | 0 |
| Case 96 | 21 | 25,351,030  | 26,040,742  | 1 | 1 | 2 | 0 |
| Case 96 | 21 | 26,041,588  | 30,189,876  | 2 | 0 | 2 | 1 |
| Case 96 | 21 | 30,196,904  | 33,060,747  | 2 | 1 | 3 | 0 |
| Case 96 | 21 | 33,065,598  | 33,505,090  | 2 | 0 | 2 | 1 |
| Case 96 | 21 | 33,507,584  | 35,543,467  | 2 | 1 | 3 | 0 |
| Case 96 | 21 | 35,545,060  | 46,441,947  | 2 | 0 | 2 | 1 |
| Case 96 | 21 | 46,451,705  | 46,742,130  | 7 | 0 | 7 | 1 |
| Case 96 | 21 | 46,746,161  | 47,777,106  | 9 | 0 | 9 | 1 |
| Case 96 | 21 | 47,783,487  | 48,100,155  | 2 | 0 | 2 | 1 |
| Case 96 | 22 | 16,114,244  | 27,139,303  | 1 | 1 | 2 | 0 |
| Case 96 | 22 | 27,141,605  | 32,914,209  | 2 | 1 | 3 | 0 |
| Case 96 | 22 | 32,914,312  | 33,408,519  | 1 | 1 | 2 | 0 |
| Case 96 | 22 | 33,411,446  | 49,195,316  | 2 | 1 | 3 | 0 |
| Case 96 | 22 | 49,196,010  | 49,200,341  | 1 | 1 | 2 | 0 |
| Case 96 | 22 | 49,201,704  | 51,195,728  | 2 | 1 | 3 | 0 |
| Case 96 | X  | 2,700,157   | 58,488,110  | 1 | 0 | 1 | 0 |
| Case 96 | X  | 61,694,576  | 70,817,804  | 1 | 0 | 1 | 0 |
| Case 96 | X  | 70,823,692  | 154,898,561 | 2 | 0 | 2 | 1 |
| Case 97 | 1  | 82,154      | 113,021,218 | 2 | 1 | 3 | 0 |
| Case 97 | 1  | 113,023,980 | 113,046,395 | 1 | 1 | 2 | 0 |
| Case 97 | 1  | 113,049,862 | 121,346,616 | 2 | 1 | 3 | 0 |
| Case 97 | 1  | 142,649,718 | 146,633,933 | 2 | 2 | 4 | 0 |
| Case 97 | 1  | 146,634,514 | 158,812,064 | 3 | 2 | 5 | 0 |
| Case 97 | 1  | 158,812,091 | 195,659,664 | 4 | 2 | 6 | 0 |
| Case 97 | 1  | 195,672,584 | 196,801,025 | 3 | 2 | 5 | 0 |
| Case 97 | 1  | 196,823,300 | 196,901,753 | 4 | 2 | 6 | 0 |
| Case 97 | 1  | 196,918,605 | 218,989,270 | 3 | 2 | 5 | 0 |
| Case 97 | 1  | 218,992,800 | 219,706,428 | 4 | 2 | 6 | 0 |
| Case 97 | 1  | 219,707,074 | 222,946,204 | 3 | 2 | 5 | 0 |
| Case 97 | 1  | 222,951,972 | 223,117,960 | 4 | 2 | 6 | 0 |
| Case 97 | 1  | 223,118,253 | 225,215,123 | 3 | 2 | 5 | 0 |
| Case 97 | 1  | 225,226,478 | 225,477,546 | 4 | 2 | 6 | 0 |
| Case 97 | 1  | 225,490,915 | 249,218,992 | 3 | 2 | 5 | 0 |
| Case 97 | 2  | 18,674      | 35,967,350  | 3 | 1 | 4 | 0 |
| Case 97 | 2  | 35,973,963  | 36,178,802  | 4 | 1 | 5 | 0 |
| Case 97 | 2  | 36,178,894  | 37,694,090  | 3 | 1 | 4 | 0 |
| Case 97 | 2  | 37,695,748  | 43,410,169  | 4 | 1 | 5 | 0 |
| Case 97 | 2  | 43,411,001  | 47,136,186  | 3 | 1 | 4 | 0 |
| Case 97 | 2  | 47,145,029  | 47,590,034  | 4 | 0 | 4 | 1 |
| Case 97 | 2  | 47,593,094  | 48,361,852  | 4 | 2 | 6 | 0 |
| Case 97 | 2  | 48,367,696  | 48,765,070  | 5 | 3 | 8 | 0 |
| Case 97 | 2  | 48,769,377  | 49,732,935  | 4 | 3 | 7 | 0 |
| Case 97 | 2  | 49,737,819  | 50,692,560  | 5 | 3 | 8 | 0 |
| Case 97 | 2  | 50,698,154  | 50,824,331  | 3 | 3 | 6 | 0 |
| Case 97 | 2  | 50,826,484  | 51,135,341  | 4 | 3 | 7 | 0 |
| Case 97 | 2  | 51,135,474  | 51,318,316  | 6 | 3 | 9 | 0 |
| Case 97 | 2  | 51,324,337  | 51,629,091  | 4 | 3 | 7 | 0 |
| Case 97 | 2  | 51,633,618  | 52,187,098  | 3 | 1 | 4 | 0 |
| Case 97 | 2  | 52,190,388  | 82,905,879  | 3 | 2 | 5 | 0 |

|         |   |             |             |   |   |   |   |
|---------|---|-------------|-------------|---|---|---|---|
| Case 97 | 2 | 82,918,725  | 83,029,469  | 4 | 2 | 6 | 0 |
| Case 97 | 2 | 83,037,125  | 92,081,640  | 3 | 2 | 5 | 0 |
| Case 97 | 2 | 95,429,424  | 107,558,907 | 3 | 2 | 5 | 0 |
| Case 97 | 2 | 107,567,363 | 119,435,628 | 3 | 1 | 4 | 0 |
| Case 97 | 2 | 119,444,229 | 119,608,582 | 4 | 1 | 5 | 0 |
| Case 97 | 2 | 119,610,043 | 127,540,119 | 3 | 1 | 4 | 0 |
| Case 97 | 2 | 127,548,764 | 127,587,337 | 4 | 1 | 5 | 0 |
| Case 97 | 2 | 127,593,168 | 134,004,520 | 3 | 1 | 4 | 0 |
| Case 97 | 2 | 134,005,569 | 135,483,381 | 4 | 1 | 5 | 0 |
| Case 97 | 2 | 135,483,413 | 141,751,676 | 3 | 1 | 4 | 0 |
| Case 97 | 2 | 141,752,588 | 141,863,233 | 3 | 2 | 5 | 0 |
| Case 97 | 2 | 141,867,448 | 166,133,632 | 3 | 1 | 4 | 0 |
| Case 97 | 2 | 166,134,322 | 166,421,414 | 4 | 1 | 5 | 0 |
| Case 97 | 2 | 166,422,010 | 181,319,803 | 3 | 1 | 4 | 0 |
| Case 97 | 2 | 181,324,735 | 193,920,436 | 4 | 1 | 5 | 0 |
| Case 97 | 2 | 193,933,194 | 205,620,551 | 3 | 1 | 4 | 0 |
| Case 97 | 2 | 205,623,306 | 205,674,952 | 1 | 0 | 1 | 0 |
| Case 97 | 2 | 205,685,674 | 207,915,477 | 3 | 1 | 4 | 0 |
| Case 97 | 2 | 207,915,849 | 208,231,478 | 4 | 1 | 5 | 0 |
| Case 97 | 2 | 208,231,640 | 242,873,800 | 3 | 1 | 4 | 0 |
| Case 97 | 2 | 242,917,734 | 243,048,760 | 4 | 1 | 5 | 0 |
| Case 97 | 3 | 61,495      | 374,869     | 4 | 0 | 4 | 1 |
| Case 97 | 3 | 375,590     | 7,883,440   | 3 | 0 | 3 | 1 |
| Case 97 | 3 | 7,889,657   | 57,165,310  | 4 | 0 | 4 | 1 |
| Case 97 | 3 | 57,173,915  | 57,974,822  | 3 | 0 | 3 | 1 |
| Case 97 | 3 | 57,977,432  | 60,053,331  | 4 | 0 | 4 | 1 |
| Case 97 | 3 | 60,055,347  | 60,390,846  | 0 | 0 | 0 | 0 |
| Case 97 | 3 | 60,396,850  | 60,421,119  | 3 | 0 | 3 | 1 |
| Case 97 | 3 | 60,423,009  | 65,173,884  | 4 | 0 | 4 | 1 |
| Case 97 | 3 | 65,177,996  | 65,560,167  | 2 | 0 | 2 | 1 |
| Case 97 | 3 | 65,562,398  | 74,669,078  | 4 | 0 | 4 | 1 |
| Case 97 | 3 | 74,670,150  | 90,442,925  | 3 | 0 | 3 | 1 |
| Case 97 | 3 | 93,537,290  | 96,066,172  | 3 | 0 | 3 | 1 |
| Case 97 | 3 | 96,073,585  | 115,195,109 | 4 | 0 | 4 | 1 |
| Case 97 | 3 | 115,200,732 | 115,335,684 | 0 | 0 | 0 | 0 |
| Case 97 | 3 | 115,339,747 | 115,536,212 | 4 | 0 | 4 | 1 |
| Case 97 | 3 | 115,543,891 | 115,721,099 | 0 | 0 | 0 | 0 |
| Case 97 | 3 | 115,728,651 | 133,000,230 | 4 | 0 | 4 | 1 |
| Case 97 | 3 | 133,004,714 | 137,659,603 | 3 | 2 | 5 | 0 |
| Case 97 | 3 | 137,664,132 | 137,781,678 | 4 | 2 | 6 | 0 |
| Case 97 | 3 | 137,781,689 | 168,546,914 | 3 | 2 | 5 | 0 |
| Case 97 | 3 | 168,564,812 | 168,610,857 | 4 | 2 | 6 | 0 |
| Case 97 | 3 | 168,615,125 | 175,228,372 | 3 | 2 | 5 | 0 |
| Case 97 | 3 | 175,233,654 | 176,011,401 | 2 | 0 | 2 | 1 |
| Case 97 | 3 | 176,014,233 | 197,838,262 | 3 | 2 | 5 | 0 |
| Case 97 | 4 | 71,566      | 973,036     | 3 | 0 | 3 | 1 |
| Case 97 | 4 | 976,598     | 6,817,928   | 4 | 0 | 4 | 1 |
| Case 97 | 4 | 6,826,228   | 7,366,947   | 2 | 0 | 2 | 1 |
| Case 97 | 4 | 7,369,230   | 8,729,471   | 4 | 0 | 4 | 1 |
| Case 97 | 4 | 8,731,330   | 9,596,615   | 3 | 0 | 3 | 1 |
| Case 97 | 4 | 9,602,724   | 18,754,324  | 4 | 0 | 4 | 1 |
| Case 97 | 4 | 18,756,789  | 21,622,448  | 3 | 0 | 3 | 1 |
| Case 97 | 4 | 21,622,793  | 21,770,028  | 2 | 0 | 2 | 1 |
| Case 97 | 4 | 21,778,153  | 22,537,387  | 4 | 0 | 4 | 1 |
| Case 97 | 4 | 22,538,841  | 42,003,775  | 3 | 0 | 3 | 1 |
| Case 97 | 4 | 42,006,057  | 49,620,898  | 3 | 2 | 5 | 0 |
| Case 97 | 4 | 52,697,856  | 60,391,854  | 3 | 2 | 5 | 0 |
| Case 97 | 4 | 60,393,064  | 73,637,861  | 2 | 1 | 3 | 0 |
| Case 97 | 4 | 73,640,679  | 73,676,145  | 1 | 1 | 2 | 0 |
| Case 97 | 4 | 73,680,605  | 91,267,470  | 2 | 1 | 3 | 0 |
| Case 97 | 4 | 91,269,591  | 91,429,013  | 3 | 1 | 4 | 0 |

|         |   |             |             |   |   |   |   |
|---------|---|-------------|-------------|---|---|---|---|
| Case 97 | 4 | 91,433,794  | 165,422,101 | 2 | 1 | 3 | 0 |
| Case 97 | 4 | 165,425,204 | 165,628,168 | 2 | 2 | 4 | 0 |
| Case 97 | 4 | 165,628,814 | 190,963,766 | 2 | 1 | 3 | 0 |
| Case 97 | 5 | 38,139      | 2,135,268   | 3 | 2 | 5 | 0 |
| Case 97 | 5 | 2,136,570   | 27,788,565  | 3 | 1 | 4 | 0 |
| Case 97 | 5 | 27,792,192  | 27,863,479  | 4 | 1 | 5 | 0 |
| Case 97 | 5 | 27,873,179  | 45,303,672  | 3 | 1 | 4 | 0 |
| Case 97 | 5 | 45,305,521  | 45,841,630  | 3 | 2 | 5 | 0 |
| Case 97 | 5 | 45,874,923  | 46,399,093  | 2 | 1 | 3 | 0 |
| Case 97 | 5 | 49,457,282  | 49,636,753  | 2 | 1 | 3 | 0 |
| Case 97 | 5 | 49,639,137  | 133,199,252 | 3 | 1 | 4 | 0 |
| Case 97 | 5 | 133,199,549 | 133,224,274 | 4 | 1 | 5 | 0 |
| Case 97 | 5 | 133,224,404 | 180,567,719 | 3 | 1 | 4 | 0 |
| Case 97 | 5 | 180,575,250 | 180,693,127 | 2 | 1 | 3 | 0 |
| Case 97 | 6 | 108,666     | 32,730,940  | 3 | 1 | 4 | 0 |
| Case 97 | 6 | 32,731,258  | 32,734,304  | 4 | 1 | 5 | 0 |
| Case 97 | 6 | 32,734,477  | 58,752,089  | 3 | 1 | 4 | 0 |
| Case 97 | 6 | 61,891,118  | 71,922,715  | 3 | 1 | 4 | 0 |
| Case 97 | 6 | 71,929,868  | 86,896,768  | 4 | 1 | 5 | 0 |
| Case 97 | 6 | 86,898,957  | 119,076,378 | 4 | 0 | 4 | 1 |
| Case 97 | 6 | 119,079,281 | 170,980,171 | 4 | 1 | 5 | 0 |
| Case 97 | 7 | 44,935      | 13,520,443  | 4 | 2 | 6 | 0 |
| Case 97 | 7 | 13,522,169  | 14,675,706  | 5 | 0 | 5 | 1 |
| Case 97 | 7 | 14,682,282  | 15,503,313  | 4 | 3 | 7 | 0 |
| Case 97 | 7 | 15,506,789  | 15,998,111  | 4 | 2 | 6 | 0 |
| Case 97 | 7 | 16,007,799  | 16,686,940  | 5 | 2 | 7 | 0 |
| Case 97 | 7 | 16,687,542  | 19,518,160  | 5 | 1 | 6 | 0 |
| Case 97 | 7 | 19,521,578  | 38,297,145  | 5 | 0 | 5 | 1 |
| Case 97 | 7 | 38,298,285  | 38,363,748  | 6 | 0 | 6 | 1 |
| Case 97 | 7 | 38,363,929  | 55,855,180  | 5 | 0 | 5 | 1 |
| Case 97 | 7 | 55,856,799  | 58,019,061  | 4 | 0 | 4 | 1 |
| Case 97 | 7 | 61,056,053  | 76,444,648  | 4 | 0 | 4 | 1 |
| Case 97 | 7 | 76,474,914  | 99,552,892  | 5 | 0 | 5 | 1 |
| Case 97 | 7 | 99,557,217  | 103,205,840 | 4 | 0 | 4 | 1 |
| Case 97 | 7 | 103,206,714 | 111,409,724 | 5 | 0 | 5 | 1 |
| Case 97 | 7 | 111,415,150 | 111,877,893 | 4 | 0 | 4 | 1 |
| Case 97 | 7 | 111,884,988 | 118,652,797 | 5 | 0 | 5 | 1 |
| Case 97 | 7 | 118,669,625 | 119,502,677 | 5 | 2 | 7 | 0 |
| Case 97 | 7 | 119,512,369 | 122,634,998 | 5 | 1 | 6 | 0 |
| Case 97 | 7 | 122,635,024 | 159,119,486 | 5 | 0 | 5 | 1 |
| Case 97 | 8 | 164,984     | 2,527,251   | 3 | 2 | 5 | 0 |
| Case 97 | 8 | 2,532,368   | 6,572,165   | 2 | 2 | 4 | 0 |
| Case 97 | 8 | 6,575,683   | 10,968,189  | 3 | 2 | 5 | 0 |
| Case 97 | 8 | 10,969,075  | 12,181,277  | 6 | 3 | 9 | 0 |
| Case 97 | 8 | 12,483,094  | 12,592,956  | 3 | 1 | 4 | 0 |
| Case 97 | 8 | 12,593,429  | 17,744,768  | 3 | 2 | 5 | 0 |
| Case 97 | 8 | 17,746,785  | 17,838,213  | 3 | 1 | 4 | 0 |
| Case 97 | 8 | 17,843,043  | 42,374,546  | 3 | 2 | 5 | 0 |
| Case 97 | 8 | 42,388,301  | 43,791,691  | 2 | 1 | 3 | 0 |
| Case 97 | 8 | 46,886,735  | 47,429,464  | 2 | 1 | 3 | 0 |
| Case 97 | 8 | 47,469,217  | 53,341,622  | 3 | 2 | 5 | 0 |
| Case 97 | 8 | 53,342,616  | 55,630,615  | 2 | 2 | 4 | 0 |
| Case 97 | 8 | 55,632,762  | 59,484,832  | 3 | 2 | 5 | 0 |
| Case 97 | 8 | 59,484,833  | 78,986,967  | 2 | 1 | 3 | 0 |
| Case 97 | 8 | 78,990,829  | 101,691,690 | 4 | 1 | 5 | 0 |
| Case 97 | 8 | 101,705,480 | 101,803,629 | 4 | 2 | 6 | 0 |
| Case 97 | 8 | 101,806,147 | 146,293,414 | 4 | 1 | 5 | 0 |
| Case 97 | 9 | 46,587      | 9,066,755   | 3 | 0 | 3 | 1 |
| Case 97 | 9 | 9,069,839   | 9,348,853   | 2 | 0 | 2 | 1 |
| Case 97 | 9 | 9,349,832   | 21,239,850  | 3 | 0 | 3 | 1 |
| Case 97 | 9 | 21,255,150  | 22,607,894  | 0 | 0 | 0 | 0 |

|         |    |             |             |    |   |    |   |
|---------|----|-------------|-------------|----|---|----|---|
| Case 97 | 9  | 22,608,275  | 31,955,694  | 3  | 0 | 3  | 1 |
| Case 97 | 9  | 31,970,850  | 35,671,627  | 5  | 2 | 7  | 0 |
| Case 97 | 9  | 35,673,891  | 46,944,322  | 3  | 2 | 5  | 0 |
| Case 97 | 9  | 65,629,772  | 141,066,491 | 3  | 1 | 4  | 0 |
| Case 97 | 10 | 98,087      | 19,990,132  | 4  | 2 | 6  | 0 |
| Case 97 | 10 | 20,002,736  | 39,097,912  | 2  | 2 | 4  | 0 |
| Case 97 | 10 | 42,436,301  | 42,884,169  | 2  | 2 | 4  | 0 |
| Case 97 | 10 | 42,893,353  | 68,129,783  | 3  | 2 | 5  | 0 |
| Case 97 | 10 | 68,130,116  | 111,581,612 | 3  | 1 | 4  | 0 |
| Case 97 | 10 | 111,585,360 | 115,850,176 | 4  | 0 | 4  | 1 |
| Case 97 | 10 | 115,856,833 | 123,904,213 | 3  | 0 | 3  | 1 |
| Case 97 | 10 | 123,907,150 | 135,477,883 | 4  | 0 | 4  | 1 |
| Case 97 | 11 | 193,146     | 8,849,495   | 4  | 0 | 4  | 1 |
| Case 97 | 11 | 8,852,239   | 10,387,833  | 3  | 0 | 3  | 1 |
| Case 97 | 11 | 10,388,782  | 18,359,742  | 4  | 0 | 4  | 1 |
| Case 97 | 11 | 18,359,784  | 18,631,527  | 3  | 0 | 3  | 1 |
| Case 97 | 11 | 18,631,622  | 22,753,580  | 4  | 0 | 4  | 1 |
| Case 97 | 11 | 22,754,297  | 26,027,163  | 3  | 0 | 3  | 1 |
| Case 97 | 11 | 26,027,235  | 26,611,665  | 4  | 0 | 4  | 1 |
| Case 97 | 11 | 26,611,796  | 32,450,067  | 3  | 1 | 4  | 0 |
| Case 97 | 11 | 32,453,536  | 33,498,468  | 3  | 0 | 3  | 1 |
| Case 97 | 11 | 33,518,390  | 49,304,358  | 3  | 1 | 4  | 0 |
| Case 97 | 11 | 49,311,134  | 50,345,592  | 3  | 2 | 5  | 0 |
| Case 97 | 11 | 50,349,310  | 51,591,253  | 3  | 1 | 4  | 0 |
| Case 97 | 11 | 54,794,237  | 55,027,673  | 3  | 1 | 4  | 0 |
| Case 97 | 11 | 55,028,549  | 69,384,851  | 3  | 2 | 5  | 0 |
| Case 97 | 11 | 69,391,327  | 69,442,963  | 4  | 2 | 6  | 0 |
| Case 97 | 11 | 69,445,284  | 79,474,831  | 3  | 2 | 5  | 0 |
| Case 97 | 11 | 79,485,137  | 87,548,852  | 3  | 1 | 4  | 0 |
| Case 97 | 11 | 87,551,827  | 87,654,207  | 4  | 1 | 5  | 0 |
| Case 97 | 11 | 87,664,122  | 132,945,546 | 3  | 1 | 4  | 0 |
| Case 97 | 11 | 132,949,473 | 134,934,063 | 4  | 1 | 5  | 0 |
| Case 97 | 12 | 191,619     | 717,138     | 4  | 0 | 4  | 1 |
| Case 97 | 12 | 721,030     | 1,515,387   | 3  | 0 | 3  | 1 |
| Case 97 | 12 | 1,517,234   | 7,993,316   | 4  | 0 | 4  | 1 |
| Case 97 | 12 | 8,000,912   | 8,123,306   | 5  | 1 | 6  | 0 |
| Case 97 | 12 | 8,125,745   | 10,772,547  | 3  | 0 | 3  | 1 |
| Case 97 | 12 | 10,772,824  | 20,818,199  | 4  | 0 | 4  | 1 |
| Case 97 | 12 | 20,818,476  | 21,658,604  | 3  | 0 | 3  | 1 |
| Case 97 | 12 | 21,659,368  | 21,761,315  | 2  | 0 | 2  | 1 |
| Case 97 | 12 | 21,780,851  | 24,115,901  | 4  | 0 | 4  | 1 |
| Case 97 | 12 | 24,117,433  | 24,164,958  | 3  | 0 | 3  | 1 |
| Case 97 | 12 | 24,166,066  | 34,263,134  | 4  | 0 | 4  | 1 |
| Case 97 | 12 | 34,266,694  | 34,853,011  | 3  | 0 | 3  | 1 |
| Case 97 | 12 | 37,876,400  | 45,725,088  | 3  | 0 | 3  | 1 |
| Case 97 | 12 | 45,726,615  | 48,991,637  | 4  | 0 | 4  | 1 |
| Case 97 | 12 | 48,995,955  | 53,505,327  | 3  | 0 | 3  | 1 |
| Case 97 | 12 | 53,509,433  | 58,423,872  | 6  | 0 | 6  | 1 |
| Case 97 | 12 | 58,437,828  | 58,750,680  | 7  | 0 | 7  | 1 |
| Case 97 | 12 | 58,757,312  | 64,311,518  | 3  | 0 | 3  | 1 |
| Case 97 | 12 | 64,312,610  | 72,791,120  | 6  | 0 | 6  | 1 |
| Case 97 | 12 | 72,792,515  | 79,911,687  | 7  | 0 | 7  | 1 |
| Case 97 | 12 | 79,922,319  | 81,901,318  | 6  | 0 | 6  | 1 |
| Case 97 | 12 | 81,907,953  | 82,466,501  | 8  | 0 | 8  | 1 |
| Case 97 | 12 | 82,468,337  | 84,839,987  | 6  | 0 | 6  | 1 |
| Case 97 | 12 | 84,848,921  | 85,766,847  | 8  | 0 | 8  | 1 |
| Case 97 | 12 | 85,785,109  | 86,373,935  | 13 | 0 | 13 | 1 |
| Case 97 | 12 | 86,377,300  | 90,062,662  | 0  | 0 | 0  | 0 |
| Case 97 | 12 | 90,064,604  | 90,777,525  | 3  | 1 | 4  | 0 |
| Case 97 | 12 | 90,781,158  | 91,068,508  | 0  | 0 | 0  | 0 |
| Case 97 | 12 | 91,071,028  | 94,331,698  | 4  | 0 | 4  | 1 |

|         |    |            |             |   |   |   |   |
|---------|----|------------|-------------|---|---|---|---|
| Case 97 | 12 | 94,334,880 | 133,810,935 | 3 | 0 | 3 | 1 |
| Case 97 | 13 | 19,058,717 | 64,860,356  | 3 | 2 | 5 | 0 |
| Case 97 | 13 | 64,864,846 | 69,282,276  | 3 | 1 | 4 | 0 |
| Case 97 | 13 | 69,282,388 | 115,103,529 | 3 | 2 | 5 | 0 |
| Case 97 | 14 | 19,280,733 | 22,434,423  | 4 | 0 | 4 | 1 |
| Case 97 | 14 | 22,435,602 | 22,988,571  | 5 | 0 | 5 | 1 |
| Case 97 | 14 | 22,997,833 | 26,704,377  | 4 | 0 | 4 | 1 |
| Case 97 | 14 | 26,710,271 | 30,311,094  | 3 | 0 | 3 | 1 |
| Case 97 | 14 | 30,312,091 | 34,712,318  | 4 | 0 | 4 | 1 |
| Case 97 | 14 | 34,718,068 | 35,703,521  | 3 | 0 | 3 | 1 |
| Case 97 | 14 | 35,703,839 | 37,418,720  | 4 | 0 | 4 | 1 |
| Case 97 | 14 | 37,420,572 | 107,287,663 | 3 | 0 | 3 | 1 |
| Case 97 | 15 | 20,034,919 | 22,369,360  | 3 | 1 | 4 | 0 |
| Case 97 | 15 | 22,382,854 | 25,652,326  | 3 | 0 | 3 | 1 |
| Case 97 | 15 | 25,654,749 | 50,669,718  | 4 | 0 | 4 | 1 |
| Case 97 | 15 | 50,672,420 | 51,233,901  | 3 | 0 | 3 | 1 |
| Case 97 | 15 | 51,237,910 | 74,615,507  | 4 | 0 | 4 | 1 |
| Case 97 | 15 | 74,617,839 | 74,627,335  | 3 | 0 | 3 | 1 |
| Case 97 | 15 | 74,627,499 | 102,461,162 | 4 | 0 | 4 | 1 |
| Case 97 | 16 | 88,165     | 11,901,557  | 4 | 1 | 5 | 0 |
| Case 97 | 16 | 11,919,959 | 12,221,828  | 3 | 1 | 4 | 0 |
| Case 97 | 16 | 12,222,064 | 25,666,094  | 4 | 1 | 5 | 0 |
| Case 97 | 16 | 25,667,914 | 25,904,991  | 6 | 1 | 7 | 0 |
| Case 97 | 16 | 25,906,665 | 35,285,582  | 4 | 1 | 5 | 0 |
| Case 97 | 16 | 46,450,037 | 64,259,501  | 4 | 0 | 4 | 1 |
| Case 97 | 16 | 64,264,242 | 66,483,806  | 5 | 0 | 5 | 1 |
| Case 97 | 16 | 66,486,925 | 78,911,326  | 4 | 0 | 4 | 1 |
| Case 97 | 16 | 78,911,336 | 79,013,032  | 0 | 0 | 0 | 0 |
| Case 97 | 16 | 79,013,587 | 81,489,930  | 4 | 0 | 4 | 1 |
| Case 97 | 16 | 81,490,749 | 83,683,945  | 5 | 0 | 5 | 1 |
| Case 97 | 16 | 83,687,469 | 86,171,280  | 4 | 0 | 4 | 1 |
| Case 97 | 16 | 86,176,291 | 86,945,763  | 5 | 0 | 5 | 1 |
| Case 97 | 16 | 86,952,035 | 90,274,695  | 4 | 0 | 4 | 1 |
| Case 97 | 17 | 11,885     | 781,533     | 2 | 2 | 4 | 0 |
| Case 97 | 17 | 782,416    | 6,114,005   | 3 | 0 | 3 | 1 |
| Case 97 | 17 | 6,114,873  | 6,733,677   | 3 | 2 | 5 | 0 |
| Case 97 | 17 | 6,738,521  | 8,943,063   | 2 | 2 | 4 | 0 |
| Case 97 | 17 | 8,956,285  | 22,242,355  | 3 | 0 | 3 | 1 |
| Case 97 | 17 | 25,268,142 | 30,616,893  | 2 | 2 | 4 | 0 |
| Case 97 | 17 | 30,621,930 | 34,597,521  | 3 | 2 | 5 | 0 |
| Case 97 | 17 | 34,815,551 | 49,494,575  | 2 | 2 | 4 | 0 |
| Case 97 | 17 | 49,494,646 | 52,467,631  | 3 | 2 | 5 | 0 |
| Case 97 | 17 | 52,483,122 | 52,845,350  | 2 | 1 | 3 | 0 |
| Case 97 | 17 | 52,847,941 | 56,157,617  | 3 | 2 | 5 | 0 |
| Case 97 | 17 | 56,158,245 | 73,059,836  | 2 | 2 | 4 | 0 |
| Case 97 | 17 | 73,060,073 | 75,995,207  | 3 | 2 | 5 | 0 |
| Case 97 | 17 | 76,012,854 | 76,301,199  | 4 | 1 | 5 | 0 |
| Case 97 | 17 | 76,304,532 | 81,060,040  | 3 | 2 | 5 | 0 |
| Case 97 | 18 | 87,505     | 694,268     | 3 | 0 | 3 | 1 |
| Case 97 | 18 | 706,478    | 3,693,772   | 5 | 0 | 5 | 1 |
| Case 97 | 18 | 3,703,559  | 6,480,844   | 2 | 0 | 2 | 1 |
| Case 97 | 18 | 6,482,886  | 6,942,997   | 0 | 0 | 0 | 0 |
| Case 97 | 18 | 6,943,264  | 6,956,238   | 1 | 0 | 1 | 0 |
| Case 97 | 18 | 6,956,393  | 8,725,016   | 0 | 0 | 0 | 0 |
| Case 97 | 18 | 8,726,629  | 15,375,878  | 2 | 0 | 2 | 1 |
| Case 97 | 18 | 18,520,354 | 18,561,020  | 2 | 0 | 2 | 1 |
| Case 97 | 18 | 18,564,483 | 20,461,282  | 4 | 0 | 4 | 1 |
| Case 97 | 18 | 20,462,455 | 71,714,278  | 2 | 0 | 2 | 1 |
| Case 97 | 18 | 71,728,552 | 73,605,345  | 5 | 0 | 5 | 1 |
| Case 97 | 18 | 73,607,635 | 78,015,180  | 4 | 0 | 4 | 1 |
| Case 97 | 19 | 260,912    | 11,881,451  | 2 | 1 | 3 | 0 |

|         |    |             |             |   |   |   |   |
|---------|----|-------------|-------------|---|---|---|---|
| Case 97 | 19 | 11,885,777  | 12,589,174  | 1 | 1 | 2 | 0 |
| Case 97 | 19 | 12,589,502  | 20,497,400  | 2 | 1 | 3 | 0 |
| Case 97 | 19 | 20,499,493  | 21,636,240  | 1 | 1 | 2 | 0 |
| Case 97 | 19 | 21,651,310  | 24,629,285  | 2 | 1 | 3 | 0 |
| Case 97 | 19 | 27,732,159  | 28,054,130  | 2 | 1 | 3 | 0 |
| Case 97 | 19 | 28,066,083  | 31,609,586  | 3 | 2 | 5 | 0 |
| Case 97 | 19 | 31,609,701  | 36,720,221  | 2 | 2 | 4 | 0 |
| Case 97 | 19 | 36,721,368  | 37,383,253  | 2 | 1 | 3 | 0 |
| Case 97 | 19 | 37,383,894  | 38,312,439  | 2 | 2 | 4 | 0 |
| Case 97 | 19 | 38,319,897  | 38,824,344  | 4 | 2 | 6 | 0 |
| Case 97 | 19 | 38,827,960  | 40,658,577  | 2 | 2 | 4 | 0 |
| Case 97 | 19 | 40,667,691  | 42,967,023  | 3 | 0 | 3 | 1 |
| Case 97 | 19 | 42,986,983  | 44,309,002  | 2 | 2 | 4 | 0 |
| Case 97 | 19 | 44,318,199  | 44,586,169  | 4 | 2 | 6 | 0 |
| Case 97 | 19 | 44,589,909  | 45,971,095  | 2 | 2 | 4 | 0 |
| Case 97 | 19 | 45,971,941  | 47,007,231  | 4 | 2 | 6 | 0 |
| Case 97 | 19 | 47,007,520  | 47,035,436  | 5 | 2 | 7 | 0 |
| Case 97 | 19 | 47,049,928  | 50,785,386  | 3 | 2 | 5 | 0 |
| Case 97 | 19 | 50,788,503  | 51,754,812  | 4 | 2 | 6 | 0 |
| Case 97 | 19 | 51,759,525  | 51,857,658  | 7 | 1 | 8 | 0 |
| Case 97 | 19 | 51,857,738  | 56,693,620  | 6 | 1 | 7 | 0 |
| Case 97 | 19 | 56,694,505  | 59,097,160  | 3 | 0 | 3 | 1 |
| Case 97 | 20 | 63,244      | 238,441     | 6 | 1 | 7 | 0 |
| Case 97 | 20 | 238,530     | 6,734,650   | 5 | 1 | 6 | 0 |
| Case 97 | 20 | 6,736,189   | 23,179,989  | 6 | 1 | 7 | 0 |
| Case 97 | 20 | 23,181,354  | 26,288,197  | 5 | 1 | 6 | 0 |
| Case 97 | 20 | 26,293,985  | 26,293,985  | 4 | 1 | 5 | 0 |
| Case 97 | 20 | 29,425,357  | 51,157,242  | 4 | 1 | 5 | 0 |
| Case 97 | 20 | 51,158,341  | 51,570,693  | 5 | 2 | 7 | 0 |
| Case 97 | 20 | 51,574,683  | 59,142,286  | 4 | 1 | 5 | 0 |
| Case 97 | 20 | 59,142,595  | 62,948,788  | 4 | 2 | 6 | 0 |
| Case 97 | 21 | 10,827,533  | 10,971,337  | 2 | 1 | 3 | 0 |
| Case 97 | 21 | 14,368,320  | 48,100,155  | 2 | 1 | 3 | 0 |
| Case 97 | 22 | 16,114,244  | 51,195,728  | 4 | 0 | 4 | 1 |
| Case 97 | X  | 2,700,157   | 58,488,110  | 2 | 0 | 2 | 1 |
| Case 97 | X  | 61,694,576  | 154,898,561 | 2 | 0 | 2 | 1 |
| Case 98 | 1  | 82,154      | 121,346,616 | 1 | 1 | 2 | 0 |
| Case 98 | 1  | 142,649,718 | 249,218,992 | 1 | 1 | 2 | 0 |
| Case 98 | 2  | 18,674      | 92,081,640  | 1 | 1 | 2 | 0 |
| Case 98 | 2  | 95,429,424  | 110,477,792 | 1 | 1 | 2 | 0 |
| Case 98 | 2  | 110,852,875 | 111,392,259 | 2 | 1 | 3 | 0 |
| Case 98 | 2  | 111,395,603 | 243,048,760 | 1 | 1 | 2 | 0 |
| Case 98 | 3  | 61,495      | 90,442,925  | 1 | 1 | 2 | 0 |
| Case 98 | 3  | 93,537,290  | 197,838,262 | 1 | 1 | 2 | 0 |
| Case 98 | 4  | 71,566      | 49,620,898  | 1 | 1 | 2 | 0 |
| Case 98 | 4  | 52,697,856  | 190,963,766 | 1 | 1 | 2 | 0 |
| Case 98 | 5  | 38,139      | 46,399,093  | 1 | 1 | 2 | 0 |
| Case 98 | 5  | 49,457,282  | 180,693,127 | 1 | 1 | 2 | 0 |
| Case 98 | 6  | 108,666     | 58,752,089  | 1 | 1 | 2 | 0 |
| Case 98 | 6  | 61,891,118  | 170,980,171 | 1 | 1 | 2 | 0 |
| Case 98 | 7  | 44,935      | 58,019,061  | 1 | 1 | 2 | 0 |
| Case 98 | 7  | 61,056,053  | 159,119,486 | 1 | 1 | 2 | 0 |
| Case 98 | 8  | 164,984     | 43,791,691  | 1 | 1 | 2 | 0 |
| Case 98 | 8  | 46,886,735  | 146,293,414 | 1 | 1 | 2 | 0 |
| Case 98 | 9  | 46,587      | 46,944,322  | 1 | 1 | 2 | 0 |
| Case 98 | 9  | 65,629,772  | 141,066,491 | 1 | 1 | 2 | 0 |
| Case 98 | 10 | 98,087      | 39,097,912  | 1 | 1 | 2 | 0 |
| Case 98 | 10 | 42,436,301  | 135,477,883 | 1 | 1 | 2 | 0 |
| Case 98 | 11 | 193,146     | 51,591,253  | 1 | 1 | 2 | 0 |
| Case 98 | 11 | 54,794,237  | 134,934,063 | 1 | 1 | 2 | 0 |
| Case 98 | 12 | 191,619     | 34,853,011  | 1 | 1 | 2 | 0 |

|          |    |             |             |   |   |   |   |
|----------|----|-------------|-------------|---|---|---|---|
| Case 98  | 12 | 37,876,400  | 133,810,935 | 1 | 1 | 2 | 0 |
| Case 98  | 13 | 19,058,717  | 115,103,529 | 1 | 1 | 2 | 0 |
| Case 98  | 14 | 19,280,733  | 107,287,663 | 1 | 1 | 2 | 0 |
| Case 98  | 15 | 20,034,919  | 45,490,974  | 1 | 1 | 2 | 0 |
| Case 98  | 15 | 45,490,988  | 46,337,445  | 2 | 1 | 3 | 0 |
| Case 98  | 15 | 46,345,687  | 102,461,162 | 1 | 1 | 2 | 0 |
| Case 98  | 16 | 88,165      | 35,285,582  | 1 | 1 | 2 | 0 |
| Case 98  | 16 | 46,450,037  | 90,274,695  | 1 | 1 | 2 | 0 |
| Case 98  | 17 | 11,885      | 22,242,355  | 1 | 1 | 2 | 0 |
| Case 98  | 17 | 25,268,142  | 34,416,038  | 1 | 1 | 2 | 0 |
| Case 98  | 17 | 34,416,058  | 34,597,521  | 2 | 1 | 3 | 0 |
| Case 98  | 17 | 34,815,551  | 81,060,040  | 1 | 1 | 2 | 0 |
| Case 98  | 18 | 87,505      | 15,375,878  | 1 | 1 | 2 | 0 |
| Case 98  | 18 | 18,520,354  | 78,015,180  | 1 | 1 | 2 | 0 |
| Case 98  | 19 | 260,912     | 24,629,285  | 1 | 1 | 2 | 0 |
| Case 98  | 19 | 27,732,159  | 59,097,160  | 1 | 1 | 2 | 0 |
| Case 98  | 20 | 63,244      | 26,293,985  | 1 | 1 | 2 | 0 |
| Case 98  | 20 | 29,425,357  | 62,948,788  | 1 | 1 | 2 | 0 |
| Case 98  | 21 | 10,827,533  | 10,971,337  | 1 | 1 | 2 | 0 |
| Case 98  | 21 | 14,368,320  | 48,100,155  | 1 | 1 | 2 | 0 |
| Case 98  | 22 | 16,114,244  | 51,195,728  | 1 | 1 | 2 | 0 |
| Case 98  | X  | 2,700,157   | 58,488,110  | 1 | 1 | 2 | 0 |
| Case 98  | X  | 61,694,576  | 154,898,561 | 1 | 1 | 2 | 0 |
| Case 100 | 1  | 82,154      | 1,219,775   | 2 | 1 | 3 | 0 |
| Case 100 | 1  | 1,220,136   | 2,381,568   | 3 | 1 | 4 | 0 |
| Case 100 | 1  | 2,387,101   | 34,283,024  | 2 | 1 | 3 | 0 |
| Case 100 | 1  | 34,286,107  | 35,485,167  | 3 | 1 | 4 | 0 |
| Case 100 | 1  | 35,485,203  | 39,071,272  | 2 | 1 | 3 | 0 |
| Case 100 | 1  | 39,076,855  | 41,618,297  | 3 | 1 | 4 | 0 |
| Case 100 | 1  | 41,634,956  | 42,360,713  | 4 | 1 | 5 | 0 |
| Case 100 | 1  | 42,361,102  | 45,067,435  | 6 | 1 | 7 | 0 |
| Case 100 | 1  | 45,067,768  | 45,740,469  | 4 | 1 | 5 | 0 |
| Case 100 | 1  | 45,742,914  | 46,179,997  | 3 | 1 | 4 | 0 |
| Case 100 | 1  | 46,182,597  | 49,189,775  | 2 | 1 | 3 | 0 |
| Case 100 | 1  | 49,193,129  | 49,352,177  | 5 | 1 | 6 | 0 |
| Case 100 | 1  | 49,361,990  | 117,767,736 | 2 | 1 | 3 | 0 |
| Case 100 | 1  | 117,767,918 | 121,346,616 | 3 | 1 | 4 | 0 |
| Case 100 | 1  | 142,649,718 | 147,276,251 | 2 | 2 | 4 | 0 |
| Case 100 | 1  | 147,277,764 | 147,394,004 | 4 | 2 | 6 | 0 |
| Case 100 | 1  | 147,420,120 | 152,166,322 | 2 | 2 | 4 | 0 |
| Case 100 | 1  | 152,183,474 | 153,135,946 | 3 | 2 | 5 | 0 |
| Case 100 | 1  | 153,136,355 | 153,584,242 | 2 | 2 | 4 | 0 |
| Case 100 | 1  | 153,585,974 | 154,252,860 | 4 | 2 | 6 | 0 |
| Case 100 | 1  | 154,270,877 | 155,723,008 | 2 | 2 | 4 | 0 |
| Case 100 | 1  | 155,723,141 | 158,450,248 | 2 | 1 | 3 | 0 |
| Case 100 | 1  | 158,450,314 | 229,004,264 | 3 | 0 | 3 | 1 |
| Case 100 | 1  | 229,005,123 | 229,141,933 | 4 | 0 | 4 | 1 |
| Case 100 | 1  | 229,142,111 | 249,218,992 | 3 | 0 | 3 | 1 |
| Case 100 | 2  | 18,674      | 43,315,848  | 3 | 0 | 3 | 1 |
| Case 100 | 2  | 43,317,253  | 43,371,542  | 4 | 2 | 6 | 0 |
| Case 100 | 2  | 43,386,134  | 46,639,626  | 3 | 2 | 5 | 0 |
| Case 100 | 2  | 46,641,955  | 49,519,654  | 2 | 2 | 4 | 0 |
| Case 100 | 2  | 49,522,163  | 69,940,780  | 3 | 0 | 3 | 1 |
| Case 100 | 2  | 69,941,287  | 70,560,939  | 2 | 0 | 2 | 1 |
| Case 100 | 2  | 70,562,650  | 73,878,352  | 3 | 0 | 3 | 1 |
| Case 100 | 2  | 73,878,827  | 73,928,422  | 5 | 0 | 5 | 1 |
| Case 100 | 2  | 73,932,044  | 92,081,640  | 3 | 0 | 3 | 1 |
| Case 100 | 2  | 95,429,424  | 98,479,581  | 3 | 0 | 3 | 1 |
| Case 100 | 2  | 98,543,945  | 133,881,219 | 3 | 2 | 5 | 0 |
| Case 100 | 2  | 133,883,098 | 142,567,436 | 2 | 2 | 4 | 0 |
| Case 100 | 2  | 142,567,860 | 171,092,865 | 3 | 2 | 5 | 0 |

|          |   |             |             |   |   |   |   |
|----------|---|-------------|-------------|---|---|---|---|
| Case 100 | 2 | 171,096,605 | 172,422,877 | 2 | 2 | 4 | 0 |
| Case 100 | 2 | 172,423,295 | 172,464,008 | 2 | 1 | 3 | 0 |
| Case 100 | 2 | 172,468,776 | 181,602,526 | 2 | 2 | 4 | 0 |
| Case 100 | 2 | 181,604,341 | 215,242,709 | 3 | 2 | 5 | 0 |
| Case 100 | 2 | 215,243,552 | 218,153,274 | 2 | 2 | 4 | 0 |
| Case 100 | 2 | 218,154,769 | 228,102,752 | 3 | 2 | 5 | 0 |
| Case 100 | 2 | 228,103,702 | 234,204,113 | 2 | 2 | 4 | 0 |
| Case 100 | 2 | 234,206,474 | 235,419,415 | 3 | 2 | 5 | 0 |
| Case 100 | 2 | 235,421,603 | 243,048,760 | 2 | 2 | 4 | 0 |
| Case 100 | 3 | 61,495      | 60,975,380  | 2 | 1 | 3 | 0 |
| Case 100 | 3 | 60,977,517  | 61,077,258  | 2 | 0 | 2 | 1 |
| Case 100 | 3 | 61,081,348  | 90,442,925  | 2 | 1 | 3 | 0 |
| Case 100 | 3 | 93,537,290  | 98,141,086  | 2 | 1 | 3 | 0 |
| Case 100 | 3 | 98,147,260  | 136,664,749 | 3 | 1 | 4 | 0 |
| Case 100 | 3 | 136,664,970 | 197,838,262 | 2 | 1 | 3 | 0 |
| Case 100 | 4 | 71,566      | 40,451,394  | 2 | 1 | 3 | 0 |
| Case 100 | 4 | 40,452,114  | 40,546,244  | 2 | 0 | 2 | 1 |
| Case 100 | 4 | 40,548,057  | 49,061,141  | 2 | 1 | 3 | 0 |
| Case 100 | 4 | 49,061,848  | 49,620,898  | 1 | 1 | 2 | 0 |
| Case 100 | 4 | 52,697,856  | 73,181,637  | 1 | 1 | 2 | 0 |
| Case 100 | 4 | 73,181,656  | 79,646,371  | 2 | 1 | 3 | 0 |
| Case 100 | 4 | 79,655,286  | 190,963,766 | 1 | 1 | 2 | 0 |
| Case 100 | 5 | 38,139      | 3,109,410   | 5 | 0 | 5 | 1 |
| Case 100 | 5 | 3,110,197   | 7,149,777   | 3 | 0 | 3 | 1 |
| Case 100 | 5 | 7,155,116   | 7,178,644   | 1 | 0 | 1 | 0 |
| Case 100 | 5 | 7,179,551   | 17,137,175  | 2 | 0 | 2 | 1 |
| Case 100 | 5 | 17,142,051  | 20,358,169  | 1 | 0 | 1 | 0 |
| Case 100 | 5 | 20,364,007  | 31,483,596  | 7 | 0 | 7 | 1 |
| Case 100 | 5 | 31,485,230  | 41,009,282  | 6 | 0 | 6 | 1 |
| Case 100 | 5 | 41,010,097  | 46,174,864  | 7 | 0 | 7 | 1 |
| Case 100 | 5 | 46,228,333  | 46,399,093  | 3 | 0 | 3 | 1 |
| Case 100 | 5 | 49,457,282  | 49,564,798  | 3 | 0 | 3 | 1 |
| Case 100 | 5 | 49,586,870  | 49,624,236  | 2 | 0 | 2 | 1 |
| Case 100 | 5 | 49,636,753  | 56,742,262  | 3 | 0 | 3 | 1 |
| Case 100 | 5 | 56,749,587  | 58,618,889  | 5 | 0 | 5 | 1 |
| Case 100 | 5 | 58,620,440  | 68,284,159  | 3 | 0 | 3 | 1 |
| Case 100 | 5 | 68,287,747  | 70,998,053  | 2 | 0 | 2 | 1 |
| Case 100 | 5 | 71,002,954  | 78,468,004  | 3 | 0 | 3 | 1 |
| Case 100 | 5 | 78,477,017  | 78,576,210  | 2 | 0 | 2 | 1 |
| Case 100 | 5 | 78,587,100  | 139,931,384 | 3 | 0 | 3 | 1 |
| Case 100 | 5 | 139,931,607 | 139,936,825 | 0 | 0 | 0 | 0 |
| Case 100 | 5 | 139,936,835 | 180,693,127 | 3 | 0 | 3 | 1 |
| Case 100 | 6 | 108,666     | 31,426,399  | 3 | 0 | 3 | 1 |
| Case 100 | 6 | 31,427,231  | 58,752,089  | 2 | 1 | 3 | 0 |
| Case 100 | 6 | 61,891,118  | 78,294,880  | 2 | 1 | 3 | 0 |
| Case 100 | 6 | 78,297,902  | 101,805,148 | 2 | 2 | 4 | 0 |
| Case 100 | 6 | 101,807,507 | 110,241,059 | 2 | 1 | 3 | 0 |
| Case 100 | 6 | 110,242,224 | 151,914,385 | 2 | 2 | 4 | 0 |
| Case 100 | 6 | 151,914,951 | 157,266,505 | 4 | 2 | 6 | 0 |
| Case 100 | 6 | 157,268,603 | 170,980,171 | 2 | 0 | 2 | 1 |
| Case 100 | 7 | 44,935      | 23,768,907  | 2 | 1 | 3 | 0 |
| Case 100 | 7 | 23,771,484  | 54,412,608  | 2 | 2 | 4 | 0 |
| Case 100 | 7 | 54,419,111  | 58,019,061  | 2 | 1 | 3 | 0 |
| Case 100 | 7 | 61,056,053  | 75,946,763  | 2 | 1 | 3 | 0 |
| Case 100 | 7 | 75,951,230  | 86,633,357  | 3 | 1 | 4 | 0 |
| Case 100 | 7 | 86,639,826  | 89,218,446  | 4 | 1 | 5 | 0 |
| Case 100 | 7 | 89,254,213  | 137,854,038 | 2 | 1 | 3 | 0 |
| Case 100 | 7 | 137,854,311 | 138,073,611 | 1 | 0 | 1 | 0 |
| Case 100 | 7 | 138,074,052 | 138,982,565 | 2 | 1 | 3 | 0 |
| Case 100 | 7 | 138,983,384 | 144,354,794 | 4 | 1 | 5 | 0 |
| Case 100 | 7 | 144,358,244 | 149,072,406 | 2 | 1 | 3 | 0 |



|          |    |             |             |   |   |   |   |
|----------|----|-------------|-------------|---|---|---|---|
| Case 100 | 7  | 149,074,314 | 149,512,800 | 1 | 1 | 2 | 0 |
| Case 100 | 7  | 149,513,077 | 149,521,199 | 1 | 0 | 1 | 0 |
| Case 100 | 7  | 149,521,517 | 159,119,486 | 2 | 1 | 3 | 0 |
| Case 100 | 8  | 164,984     | 6,016,650   | 4 | 0 | 4 | 1 |
| Case 100 | 8  | 6,016,801   | 12,554,743  | 3 | 1 | 4 | 0 |
| Case 100 | 8  | 12,559,475  | 13,590,754  | 6 | 1 | 7 | 0 |
| Case 100 | 8  | 13,593,642  | 13,766,875  | 8 | 0 | 8 | 1 |
| Case 100 | 8  | 13,777,214  | 38,088,406  | 3 | 0 | 3 | 1 |
| Case 100 | 8  | 38,091,917  | 43,791,691  | 3 | 1 | 4 | 0 |
| Case 100 | 8  | 46,886,735  | 50,808,334  | 3 | 1 | 4 | 0 |
| Case 100 | 8  | 50,809,407  | 54,852,787  | 3 | 2 | 5 | 0 |
| Case 100 | 8  | 54,855,680  | 61,226,540  | 2 | 1 | 3 | 0 |
| Case 100 | 8  | 61,230,529  | 62,596,622  | 3 | 2 | 5 | 0 |
| Case 100 | 8  | 62,599,098  | 69,532,253  | 2 | 2 | 4 | 0 |
| Case 100 | 8  | 69,534,542  | 76,230,301  | 2 | 1 | 3 | 0 |
| Case 100 | 8  | 76,231,410  | 79,374,229  | 2 | 2 | 4 | 0 |
| Case 100 | 8  | 79,394,667  | 81,036,045  | 5 | 2 | 7 | 0 |
| Case 100 | 8  | 81,045,600  | 83,273,087  | 4 | 2 | 6 | 0 |
| Case 100 | 8  | 83,273,096  | 85,284,531  | 5 | 2 | 7 | 0 |
| Case 100 | 8  | 85,295,976  | 113,099,309 | 3 | 2 | 5 | 0 |
| Case 100 | 8  | 113,110,939 | 120,744,349 | 4 | 1 | 5 | 0 |
| Case 100 | 8  | 120,744,399 | 125,493,942 | 3 | 1 | 4 | 0 |
| Case 100 | 8  | 125,498,341 | 129,503,291 | 4 | 1 | 5 | 0 |
| Case 100 | 8  | 129,503,361 | 133,158,041 | 4 | 2 | 6 | 0 |
| Case 100 | 8  | 133,162,001 | 140,720,163 | 3 | 2 | 5 | 0 |
| Case 100 | 8  | 140,720,412 | 146,293,414 | 2 | 1 | 3 | 0 |
| Case 100 | 9  | 46,587      | 8,733,788   | 3 | 0 | 3 | 1 |
| Case 100 | 9  | 8,733,833   | 46,944,322  | 2 | 0 | 2 | 1 |
| Case 100 | 9  | 65,629,772  | 141,066,491 | 4 | 1 | 5 | 0 |
| Case 100 | 10 | 98,087      | 39,097,912  | 1 | 1 | 2 | 0 |
| Case 100 | 10 | 42,436,301  | 61,011,974  | 1 | 1 | 2 | 0 |
| Case 100 | 10 | 61,012,596  | 61,029,777  | 3 | 0 | 3 | 1 |
| Case 100 | 10 | 61,035,570  | 61,651,701  | 4 | 1 | 5 | 0 |
| Case 100 | 10 | 61,657,741  | 62,072,030  | 3 | 1 | 4 | 0 |
| Case 100 | 10 | 62,078,203  | 62,826,952  | 4 | 1 | 5 | 0 |
| Case 100 | 10 | 62,828,045  | 66,510,544  | 3 | 1 | 4 | 0 |
| Case 100 | 10 | 66,515,337  | 68,594,908  | 2 | 1 | 3 | 0 |
| Case 100 | 10 | 68,597,130  | 71,368,698  | 1 | 1 | 2 | 0 |
| Case 100 | 10 | 71,372,590  | 73,724,757  | 2 | 1 | 3 | 0 |
| Case 100 | 10 | 73,729,228  | 77,072,928  | 1 | 1 | 2 | 0 |
| Case 100 | 10 | 77,073,351  | 80,853,508  | 2 | 1 | 3 | 0 |
| Case 100 | 10 | 80,854,255  | 109,514,980 | 1 | 1 | 2 | 0 |
| Case 100 | 10 | 109,519,015 | 120,366,341 | 2 | 1 | 3 | 0 |
| Case 100 | 10 | 120,368,581 | 121,436,483 | 1 | 1 | 2 | 0 |
| Case 100 | 10 | 121,436,502 | 135,477,883 | 2 | 1 | 3 | 0 |
| Case 100 | 11 | 193,146     | 9,202,357   | 3 | 0 | 3 | 1 |
| Case 100 | 11 | 9,206,279   | 9,625,196   | 2 | 0 | 2 | 1 |
| Case 100 | 11 | 9,627,471   | 45,001,728  | 3 | 0 | 3 | 1 |
| Case 100 | 11 | 45,009,133  | 45,117,171  | 6 | 2 | 8 | 0 |
| Case 100 | 11 | 45,117,405  | 46,886,077  | 4 | 2 | 6 | 0 |
| Case 100 | 11 | 46,890,165  | 48,754,534  | 3 | 2 | 5 | 0 |
| Case 100 | 11 | 48,760,364  | 50,292,520  | 3 | 1 | 4 | 0 |
| Case 100 | 11 | 50,296,502  | 51,521,929  | 2 | 1 | 3 | 0 |
| Case 100 | 11 | 51,525,878  | 51,591,253  | 3 | 1 | 4 | 0 |
| Case 100 | 11 | 54,794,237  | 60,768,044  | 3 | 1 | 4 | 0 |
| Case 100 | 11 | 60,772,090  | 68,254,328  | 2 | 1 | 3 | 0 |
| Case 100 | 11 | 68,256,847  | 89,404,829  | 3 | 1 | 4 | 0 |
| Case 100 | 11 | 89,405,190  | 95,621,376  | 2 | 1 | 3 | 0 |
| Case 100 | 11 | 95,634,278  | 99,722,295  | 2 | 2 | 4 | 0 |
| Case 100 | 11 | 99,726,369  | 100,793,518 | 2 | 0 | 2 | 1 |
| Case 100 | 11 | 100,793,689 | 104,897,049 | 2 | 2 | 4 | 0 |

|          |    |             |             |   |   |   |   |
|----------|----|-------------|-------------|---|---|---|---|
| Case 100 | 11 | 104,897,437 | 104,955,489 | 2 | 1 | 3 | 0 |
| Case 100 | 11 | 104,958,571 | 114,984,572 | 2 | 2 | 4 | 0 |
| Case 100 | 11 | 114,995,252 | 124,086,422 | 2 | 1 | 3 | 0 |
| Case 100 | 11 | 124,094,644 | 126,837,505 | 2 | 2 | 4 | 0 |
| Case 100 | 11 | 126,841,619 | 128,727,063 | 2 | 0 | 2 | 1 |
| Case 100 | 11 | 128,729,845 | 129,616,272 | 2 | 2 | 4 | 0 |
| Case 100 | 11 | 129,618,046 | 134,934,063 | 2 | 0 | 2 | 1 |
| Case 100 | 12 | 191,619     | 34,853,011  | 3 | 1 | 4 | 0 |
| Case 100 | 12 | 37,876,400  | 57,908,775  | 3 | 1 | 4 | 0 |
| Case 100 | 12 | 57,908,817  | 71,572,041  | 4 | 0 | 4 | 1 |
| Case 100 | 12 | 71,575,611  | 73,670,532  | 3 | 0 | 3 | 1 |
| Case 100 | 12 | 73,673,738  | 120,189,879 | 3 | 1 | 4 | 0 |
| Case 100 | 12 | 120,189,888 | 124,349,236 | 2 | 1 | 3 | 0 |
| Case 100 | 12 | 124,352,122 | 133,810,935 | 3 | 1 | 4 | 0 |
| Case 100 | 13 | 19,058,717  | 43,469,222  | 2 | 1 | 3 | 0 |
| Case 100 | 13 | 43,471,403  | 43,570,801  | 3 | 2 | 5 | 0 |
| Case 100 | 13 | 43,571,021  | 43,755,216  | 4 | 1 | 5 | 0 |
| Case 100 | 13 | 43,760,740  | 43,777,086  | 3 | 2 | 5 | 0 |
| Case 100 | 13 | 43,777,114  | 79,559,862  | 2 | 1 | 3 | 0 |
| Case 100 | 13 | 79,559,977  | 94,598,974  | 3 | 1 | 4 | 0 |
| Case 100 | 13 | 94,612,361  | 94,812,010  | 1 | 1 | 2 | 0 |
| Case 100 | 13 | 94,818,360  | 115,103,529 | 3 | 1 | 4 | 0 |
| Case 100 | 14 | 19,280,733  | 22,340,873  | 3 | 0 | 3 | 1 |
| Case 100 | 14 | 22,342,442  | 22,963,646  | 4 | 0 | 4 | 1 |
| Case 100 | 14 | 22,964,782  | 42,870,461  | 3 | 0 | 3 | 1 |
| Case 100 | 14 | 42,870,963  | 42,952,898  | 0 | 0 | 0 | 0 |
| Case 100 | 14 | 42,961,305  | 88,349,471  | 3 | 0 | 3 | 1 |
| Case 100 | 14 | 88,355,122  | 88,431,898  | 5 | 0 | 5 | 1 |
| Case 100 | 14 | 88,431,969  | 107,287,663 | 3 | 0 | 3 | 1 |
| Case 100 | 15 | 20,034,919  | 26,811,016  | 2 | 1 | 3 | 0 |
| Case 100 | 15 | 26,811,130  | 38,975,293  | 1 | 1 | 2 | 0 |
| Case 100 | 15 | 38,976,860  | 45,440,621  | 2 | 1 | 3 | 0 |
| Case 100 | 15 | 45,442,896  | 45,488,132  | 1 | 1 | 2 | 0 |
| Case 100 | 15 | 45,490,974  | 55,321,128  | 2 | 1 | 3 | 0 |
| Case 100 | 15 | 55,321,542  | 57,028,497  | 1 | 1 | 2 | 0 |
| Case 100 | 15 | 57,029,988  | 74,489,153  | 2 | 1 | 3 | 0 |
| Case 100 | 15 | 74,489,207  | 76,315,542  | 1 | 1 | 2 | 0 |
| Case 100 | 15 | 76,350,112  | 89,274,007  | 2 | 1 | 3 | 0 |
| Case 100 | 15 | 89,274,382  | 90,771,750  | 1 | 1 | 2 | 0 |
| Case 100 | 15 | 90,771,754  | 102,461,162 | 2 | 1 | 3 | 0 |
| Case 100 | 16 | 88,165      | 14,760,734  | 2 | 1 | 3 | 0 |
| Case 100 | 16 | 14,761,632  | 16,363,239  | 2 | 2 | 4 | 0 |
| Case 100 | 16 | 16,633,361  | 35,285,582  | 2 | 1 | 3 | 0 |
| Case 100 | 16 | 46,450,037  | 90,274,695  | 1 | 1 | 2 | 0 |
| Case 100 | 17 | 11,885      | 22,242,355  | 3 | 0 | 3 | 1 |
| Case 100 | 17 | 25,268,142  | 31,320,980  | 3 | 0 | 3 | 1 |
| Case 100 | 17 | 31,321,391  | 72,838,645  | 4 | 0 | 4 | 1 |
| Case 100 | 17 | 72,838,649  | 74,336,545  | 3 | 0 | 3 | 1 |
| Case 100 | 17 | 74,338,471  | 81,060,040  | 4 | 0 | 4 | 1 |
| Case 100 | 18 | 87,505      | 15,375,878  | 3 | 2 | 5 | 0 |
| Case 100 | 18 | 18,520,354  | 18,609,580  | 3 | 2 | 5 | 0 |
| Case 100 | 18 | 18,618,070  | 20,833,757  | 6 | 1 | 7 | 0 |
| Case 100 | 18 | 20,833,766  | 22,783,059  | 4 | 2 | 6 | 0 |
| Case 100 | 18 | 22,799,933  | 23,459,792  | 4 | 1 | 5 | 0 |
| Case 100 | 18 | 23,463,097  | 34,964,005  | 1 | 1 | 2 | 0 |
| Case 100 | 18 | 34,967,177  | 48,333,222  | 2 | 1 | 3 | 0 |
| Case 100 | 18 | 48,334,741  | 71,205,938  | 1 | 1 | 2 | 0 |
| Case 100 | 18 | 71,210,496  | 73,925,653  | 2 | 1 | 3 | 0 |
| Case 100 | 18 | 73,930,268  | 76,080,011  | 1 | 1 | 2 | 0 |
| Case 100 | 18 | 76,080,113  | 76,150,938  | 1 | 0 | 1 | 0 |
| Case 100 | 18 | 76,153,361  | 78,015,180  | 2 | 1 | 3 | 0 |

|          |    |             |             |    |   |    |   |
|----------|----|-------------|-------------|----|---|----|---|
| Case 100 | 19 | 260,912     | 7,831,628   | 3  | 0 | 3  | 1 |
| Case 100 | 19 | 7,831,953   | 7,846,887   | 5  | 0 | 5  | 1 |
| Case 100 | 19 | 7,849,978   | 20,101,636  | 3  | 0 | 3  | 1 |
| Case 100 | 19 | 20,108,062  | 21,771,069  | 2  | 0 | 2  | 1 |
| Case 100 | 19 | 21,775,371  | 24,545,366  | 3  | 0 | 3  | 1 |
| Case 100 | 19 | 24,629,285  | 24,629,285  | 2  | 1 | 3  | 0 |
| Case 100 | 19 | 27,732,159  | 28,252,131  | 2  | 1 | 3  | 0 |
| Case 100 | 19 | 28,258,027  | 52,599,288  | 3  | 1 | 4  | 0 |
| Case 100 | 19 | 52,601,399  | 54,288,501  | 2  | 1 | 3  | 0 |
| Case 100 | 19 | 54,291,411  | 59,097,160  | 3  | 1 | 4  | 0 |
| Case 100 | 20 | 63,244      | 26,293,985  | 3  | 2 | 5  | 0 |
| Case 100 | 20 | 29,425,357  | 62,948,788  | 3  | 2 | 5  | 0 |
| Case 100 | 21 | 10,827,533  | 10,971,337  | 2  | 0 | 2  | 1 |
| Case 100 | 21 | 14,368,320  | 30,734,388  | 2  | 0 | 2  | 1 |
| Case 100 | 21 | 30,742,996  | 31,909,272  | 3  | 0 | 3  | 1 |
| Case 100 | 21 | 31,909,451  | 48,100,155  | 2  | 0 | 2  | 1 |
| Case 100 | 22 | 16,114,244  | 51,195,728  | 3  | 0 | 3  | 1 |
| Case 100 | X  | 2,700,157   | 58,488,110  | 3  | 0 | 3  | 1 |
| Case 100 | X  | 61,694,576  | 114,812,361 | 3  | 0 | 3  | 1 |
| Case 100 | X  | 114,821,491 | 115,024,720 | 2  | 0 | 2  | 1 |
| Case 100 | X  | 115,028,558 | 154,898,561 | 3  | 0 | 3  | 1 |
| Case 101 | 1  | 82,154      | 1,005,806   | 1  | 1 | 2  | 0 |
| Case 101 | 1  | 1,017,197   | 1,089,699   | 1  | 0 | 1  | 0 |
| Case 101 | 1  | 1,097,335   | 121,346,616 | 1  | 1 | 2  | 0 |
| Case 101 | 1  | 142,649,718 | 175,518,442 | 1  | 1 | 2  | 0 |
| Case 101 | 1  | 175,521,376 | 175,552,252 | 2  | 2 | 4  | 0 |
| Case 101 | 1  | 175,552,365 | 249,218,992 | 1  | 1 | 2  | 0 |
| Case 101 | 2  | 18,674      | 92,081,640  | 1  | 1 | 2  | 0 |
| Case 101 | 2  | 95,429,424  | 206,690,019 | 1  | 1 | 2  | 0 |
| Case 101 | 2  | 206,699,721 | 206,874,339 | 2  | 1 | 3  | 0 |
| Case 101 | 2  | 206,874,491 | 234,847,750 | 1  | 1 | 2  | 0 |
| Case 101 | 2  | 234,847,790 | 236,228,143 | 1  | 0 | 1  | 0 |
| Case 101 | 2  | 236,228,570 | 243,048,760 | 1  | 1 | 2  | 0 |
| Case 101 | 3  | 61,495      | 60,441,079  | 1  | 1 | 2  | 0 |
| Case 101 | 3  | 60,445,253  | 60,743,058  | 1  | 0 | 1  | 0 |
| Case 101 | 3  | 60,744,333  | 90,442,925  | 1  | 1 | 2  | 0 |
| Case 101 | 3  | 93,537,290  | 168,496,750 | 1  | 1 | 2  | 0 |
| Case 101 | 3  | 168,520,843 | 168,889,604 | 16 | 0 | 16 | 1 |
| Case 101 | 3  | 168,903,973 | 169,918,311 | 1  | 1 | 2  | 0 |
| Case 101 | 3  | 169,925,664 | 170,176,673 | 17 | 0 | 17 | 1 |
| Case 101 | 3  | 170,178,057 | 170,417,673 | 12 | 0 | 12 | 1 |
| Case 101 | 3  | 170,438,978 | 197,838,262 | 1  | 1 | 2  | 0 |
| Case 101 | 4  | 71,566      | 49,620,898  | 1  | 1 | 2  | 0 |
| Case 101 | 4  | 52,697,856  | 190,963,766 | 1  | 1 | 2  | 0 |
| Case 101 | 5  | 38,139      | 4,175,312   | 1  | 1 | 2  | 0 |
| Case 101 | 5  | 4,176,833   | 4,831,601   | 1  | 0 | 1  | 0 |
| Case 101 | 5  | 4,831,687   | 46,117,770  | 1  | 1 | 2  | 0 |
| Case 101 | 5  | 46,127,095  | 46,399,093  | 1  | 0 | 1  | 0 |
| Case 101 | 5  | 49,457,282  | 49,522,346  | 1  | 0 | 1  | 0 |
| Case 101 | 5  | 49,564,798  | 114,719,148 | 1  | 1 | 2  | 0 |
| Case 101 | 5  | 114,721,062 | 115,068,867 | 2  | 1 | 3  | 0 |
| Case 101 | 5  | 115,070,403 | 180,693,127 | 1  | 1 | 2  | 0 |
| Case 101 | 6  | 108,666     | 58,752,089  | 1  | 1 | 2  | 0 |
| Case 101 | 6  | 61,891,118  | 137,112,958 | 1  | 1 | 2  | 0 |
| Case 101 | 6  | 137,113,248 | 166,904,398 | 1  | 0 | 1  | 0 |
| Case 101 | 6  | 166,904,927 | 167,814,089 | 2  | 0 | 2  | 1 |
| Case 101 | 6  | 167,814,784 | 170,980,171 | 1  | 0 | 1  | 0 |
| Case 101 | 7  | 44,935      | 163,185     | 3  | 0 | 3  | 1 |
| Case 101 | 7  | 171,613     | 58,019,061  | 2  | 0 | 2  | 1 |
| Case 101 | 7  | 61,056,053  | 153,992,610 | 2  | 0 | 2  | 1 |
| Case 101 | 7  | 154,001,207 | 154,468,976 | 1  | 0 | 1  | 0 |

|          |    |             |             |    |   |    |   |
|----------|----|-------------|-------------|----|---|----|---|
| Case 101 | 7  | 154,470,392 | 159,119,486 | 2  | 0 | 2  | 1 |
| Case 101 | 8  | 164,984     | 43,791,691  | 2  | 1 | 3  | 0 |
| Case 101 | 8  | 46,886,735  | 47,147,363  | 2  | 1 | 3  | 0 |
| Case 101 | 8  | 47,162,442  | 59,301,494  | 3  | 1 | 4  | 0 |
| Case 101 | 8  | 59,303,159  | 146,218,441 | 4  | 1 | 5  | 0 |
| Case 101 | 8  | 146,225,112 | 146,264,714 | 6  | 2 | 8  | 0 |
| Case 101 | 8  | 146,268,421 | 146,293,414 | 3  | 1 | 4  | 0 |
| Case 101 | 9  | 46,587      | 9,262,323   | 1  | 1 | 2  | 0 |
| Case 101 | 9  | 9,263,980   | 9,530,755   | 1  | 0 | 1  | 0 |
| Case 101 | 9  | 9,533,062   | 46,944,322  | 1  | 1 | 2  | 0 |
| Case 101 | 9  | 65,629,772  | 141,066,491 | 1  | 1 | 2  | 0 |
| Case 101 | 10 | 98,087      | 39,097,912  | 1  | 1 | 2  | 0 |
| Case 101 | 10 | 42,436,301  | 135,477,883 | 1  | 1 | 2  | 0 |
| Case 101 | 11 | 193,146     | 51,591,253  | 1  | 1 | 2  | 0 |
| Case 101 | 11 | 54,794,237  | 134,934,063 | 1  | 1 | 2  | 0 |
| Case 101 | 12 | 191,619     | 34,853,011  | 1  | 1 | 2  | 0 |
| Case 101 | 12 | 37,876,400  | 133,810,935 | 1  | 1 | 2  | 0 |
| Case 101 | 13 | 19,058,717  | 115,103,529 | 2  | 1 | 3  | 0 |
| Case 101 | 14 | 19,280,733  | 20,425,051  | 2  | 1 | 3  | 0 |
| Case 101 | 14 | 20,426,742  | 22,289,359  | 1  | 1 | 2  | 0 |
| Case 101 | 14 | 22,290,777  | 22,977,222  | 2  | 1 | 3  | 0 |
| Case 101 | 14 | 22,978,335  | 47,165,897  | 1  | 1 | 2  | 0 |
| Case 101 | 14 | 47,169,434  | 49,384,358  | 1  | 0 | 1  | 0 |
| Case 101 | 14 | 49,391,003  | 49,426,842  | 2  | 1 | 3  | 0 |
| Case 101 | 14 | 49,434,788  | 82,489,254  | 1  | 0 | 1  | 0 |
| Case 101 | 14 | 82,505,045  | 107,287,663 | 1  | 1 | 2  | 0 |
| Case 101 | 15 | 20,034,919  | 102,461,162 | 1  | 1 | 2  | 0 |
| Case 101 | 16 | 88,165      | 35,285,582  | 1  | 1 | 2  | 0 |
| Case 101 | 16 | 46,450,037  | 90,274,695  | 1  | 1 | 2  | 0 |
| Case 101 | 17 | 11,885      | 22,242,355  | 1  | 0 | 1  | 0 |
| Case 101 | 17 | 25,268,142  | 25,583,451  | 1  | 0 | 1  | 0 |
| Case 101 | 17 | 25,583,652  | 30,497,949  | 3  | 1 | 4  | 0 |
| Case 101 | 17 | 30,511,274  | 30,752,964  | 12 | 3 | 15 | 0 |
| Case 101 | 17 | 30,782,356  | 30,841,962  | 4  | 0 | 4  | 1 |
| Case 101 | 17 | 30,858,969  | 32,639,369  | 1  | 0 | 1  | 0 |
| Case 101 | 17 | 32,641,225  | 32,717,213  | 6  | 2 | 8  | 0 |
| Case 101 | 17 | 32,720,064  | 35,825,642  | 1  | 0 | 1  | 0 |
| Case 101 | 17 | 35,830,554  | 37,049,116  | 1  | 1 | 2  | 0 |
| Case 101 | 17 | 37,052,131  | 37,815,305  | 2  | 1 | 3  | 0 |
| Case 101 | 17 | 37,816,461  | 37,894,463  | 10 | 3 | 13 | 0 |
| Case 101 | 17 | 37,898,705  | 38,027,783  | 4  | 1 | 5  | 0 |
| Case 101 | 17 | 38,027,824  | 38,061,072  | 5  | 1 | 6  | 0 |
| Case 101 | 17 | 38,061,144  | 38,257,090  | 4  | 1 | 5  | 0 |
| Case 101 | 17 | 38,264,197  | 39,296,135  | 1  | 1 | 2  | 0 |
| Case 101 | 17 | 39,304,357  | 57,786,853  | 1  | 0 | 1  | 0 |
| Case 101 | 17 | 57,800,358  | 59,893,990  | 3  | 1 | 4  | 0 |
| Case 101 | 17 | 59,897,455  | 60,192,598  | 1  | 1 | 2  | 0 |
| Case 101 | 17 | 60,193,561  | 65,182,445  | 1  | 0 | 1  | 0 |
| Case 101 | 17 | 65,185,800  | 66,678,300  | 3  | 1 | 4  | 0 |
| Case 101 | 17 | 66,683,179  | 70,438,529  | 1  | 0 | 1  | 0 |
| Case 101 | 17 | 70,441,333  | 70,584,265  | 3  | 0 | 3  | 1 |
| Case 101 | 17 | 70,587,775  | 79,459,399  | 1  | 0 | 1  | 0 |
| Case 101 | 17 | 79,468,574  | 81,060,040  | 2  | 0 | 2  | 1 |
| Case 101 | 18 | 87,505      | 15,375,878  | 1  | 1 | 2  | 0 |
| Case 101 | 18 | 18,520,354  | 58,464,082  | 1  | 1 | 2  | 0 |
| Case 101 | 18 | 58,491,809  | 58,506,709  | 2  | 2 | 4  | 0 |
| Case 101 | 18 | 58,507,020  | 78,015,180  | 1  | 1 | 2  | 0 |
| Case 101 | 19 | 260,912     | 2,753,270   | 1  | 1 | 2  | 0 |
| Case 101 | 19 | 2,753,983   | 2,771,641   | 1  | 0 | 1  | 0 |
| Case 101 | 19 | 2,775,144   | 24,629,285  | 1  | 1 | 2  | 0 |
| Case 101 | 19 | 27,732,159  | 59,097,160  | 1  | 1 | 2  | 0 |

|          |    |             |             |   |   |    |   |
|----------|----|-------------|-------------|---|---|----|---|
| Case 101 | 20 | 63,244      | 26,293,985  | 2 | 1 | 3  | 0 |
| Case 101 | 20 | 29,425,357  | 62,948,788  | 2 | 1 | 3  | 0 |
| Case 101 | 21 | 10,827,533  | 10,971,337  | 1 | 1 | 2  | 0 |
| Case 101 | 21 | 14,368,320  | 48,100,155  | 1 | 1 | 2  | 0 |
| Case 101 | 22 | 16,114,244  | 51,195,728  | 1 | 1 | 2  | 0 |
| Case 101 | X  | 2,700,157   | 7,369,040   | 2 | 1 | 3  | 0 |
| Case 101 | X  | 7,380,425   | 7,566,613   | 1 | 1 | 2  | 0 |
| Case 101 | X  | 7,575,984   | 58,488,110  | 2 | 1 | 3  | 0 |
| Case 101 | X  | 61,694,576  | 154,898,561 | 2 | 1 | 3  | 0 |
| Case 103 | 1  | 82,154      | 3,680,729   | 2 | 0 | 2  | 1 |
| Case 103 | 1  | 3,681,831   | 121,346,616 | 3 | 0 | 3  | 1 |
| Case 103 | 1  | 142,649,718 | 228,269,089 | 4 | 0 | 4  | 1 |
| Case 103 | 1  | 228,275,661 | 228,576,253 | 3 | 0 | 3  | 1 |
| Case 103 | 1  | 228,579,788 | 249,218,992 | 4 | 0 | 4  | 1 |
| Case 103 | 2  | 18,674      | 92,081,640  | 2 | 1 | 3  | 0 |
| Case 103 | 2  | 95,429,424  | 205,631,567 | 2 | 1 | 3  | 0 |
| Case 103 | 2  | 205,636,870 | 206,139,804 | 2 | 0 | 2  | 1 |
| Case 103 | 2  | 206,139,895 | 243,048,760 | 2 | 1 | 3  | 0 |
| Case 103 | 3  | 61,495      | 35,190,794  | 2 | 1 | 3  | 0 |
| Case 103 | 3  | 35,231,021  | 35,290,327  | 1 | 0 | 1  | 0 |
| Case 103 | 3  | 35,291,791  | 60,305,117  | 2 | 1 | 3  | 0 |
| Case 103 | 3  | 60,306,891  | 60,407,864  | 1 | 0 | 1  | 0 |
| Case 103 | 3  | 60,408,404  | 60,439,043  | 0 | 0 | 0  | 0 |
| Case 103 | 3  | 60,441,079  | 90,442,925  | 2 | 1 | 3  | 0 |
| Case 103 | 3  | 93,537,290  | 197,838,262 | 2 | 1 | 3  | 0 |
| Case 103 | 4  | 71,566      | 49,620,898  | 1 | 1 | 2  | 0 |
| Case 103 | 4  | 52,697,856  | 92,452,205  | 1 | 1 | 2  | 0 |
| Case 103 | 4  | 92,454,931  | 92,803,775  | 2 | 1 | 3  | 0 |
| Case 103 | 4  | 92,816,815  | 177,974,062 | 1 | 1 | 2  | 0 |
| Case 103 | 4  | 177,974,857 | 178,791,367 | 1 | 0 | 1  | 0 |
| Case 103 | 4  | 178,793,689 | 190,963,766 | 1 | 1 | 2  | 0 |
| Case 103 | 5  | 38,139      | 1,529,358   | 2 | 1 | 3  | 0 |
| Case 103 | 5  | 1,529,401   | 46,399,093  | 3 | 1 | 4  | 0 |
| Case 103 | 5  | 49,457,282  | 180,693,127 | 1 | 1 | 2  | 0 |
| Case 103 | 6  | 108,666     | 58,752,089  | 2 | 1 | 3  | 0 |
| Case 103 | 6  | 61,891,118  | 162,914,986 | 2 | 1 | 3  | 0 |
| Case 103 | 6  | 162,917,942 | 163,007,394 | 1 | 0 | 1  | 0 |
| Case 103 | 6  | 163,023,054 | 170,980,171 | 2 | 1 | 3  | 0 |
| Case 103 | 7  | 44,935      | 7,054,045   | 3 | 1 | 4  | 0 |
| Case 103 | 7  | 7,054,164   | 17,425,895  | 4 | 1 | 5  | 0 |
| Case 103 | 7  | 17,432,838  | 17,467,225  | 9 | 1 | 10 | 0 |
| Case 103 | 7  | 17,472,677  | 58,019,061  | 4 | 1 | 5  | 0 |
| Case 103 | 7  | 61,056,053  | 99,654,708  | 4 | 1 | 5  | 0 |
| Case 103 | 7  | 99,655,373  | 102,470,275 | 3 | 1 | 4  | 0 |
| Case 103 | 7  | 102,471,345 | 147,798,729 | 4 | 1 | 5  | 0 |
| Case 103 | 7  | 147,803,861 | 159,119,486 | 3 | 1 | 4  | 0 |
| Case 103 | 8  | 164,984     | 2,121,498   | 2 | 2 | 4  | 0 |
| Case 103 | 8  | 2,121,789   | 11,696,352  | 3 | 2 | 5  | 0 |
| Case 103 | 8  | 11,696,492  | 43,791,691  | 2 | 2 | 4  | 0 |
| Case 103 | 8  | 46,886,735  | 46,953,540  | 2 | 2 | 4  | 0 |
| Case 103 | 8  | 46,965,788  | 48,235,279  | 2 | 1 | 3  | 0 |
| Case 103 | 8  | 48,236,907  | 141,858,620 | 2 | 2 | 4  | 0 |
| Case 103 | 8  | 141,889,589 | 146,293,414 | 2 | 1 | 3  | 0 |
| Case 103 | 9  | 46,587      | 8,977,444   | 2 | 1 | 3  | 0 |
| Case 103 | 9  | 8,980,881   | 9,328,048   | 1 | 1 | 2  | 0 |
| Case 103 | 9  | 9,337,454   | 9,404,813   | 1 | 0 | 1  | 0 |
| Case 103 | 9  | 9,404,896   | 46,944,322  | 2 | 1 | 3  | 0 |
| Case 103 | 9  | 65,629,772  | 141,066,491 | 2 | 1 | 3  | 0 |
| Case 103 | 10 | 98,087      | 39,097,912  | 1 | 1 | 2  | 0 |
| Case 103 | 10 | 42,436,301  | 42,682,133  | 1 | 1 | 2  | 0 |
| Case 103 | 10 | 42,725,663  | 43,039,187  | 3 | 1 | 4  | 0 |

|          |    |             |             |   |   |   |   |
|----------|----|-------------|-------------|---|---|---|---|
| Case 103 | 10 | 43,039,766  | 135,252,347 | 1 | 1 | 2 | 0 |
| Case 103 | 10 | 135,256,762 | 135,477,883 | 3 | 1 | 4 | 0 |
| Case 103 | 11 | 193,146     | 51,591,253  | 2 | 0 | 2 | 1 |
| Case 103 | 11 | 54,794,237  | 64,198,311  | 2 | 0 | 2 | 1 |
| Case 103 | 11 | 64,202,474  | 64,323,613  | 3 | 0 | 3 | 1 |
| Case 103 | 11 | 64,323,656  | 66,359,489  | 2 | 0 | 2 | 1 |
| Case 103 | 11 | 66,359,781  | 70,253,475  | 5 | 1 | 6 | 0 |
| Case 103 | 11 | 70,257,669  | 134,934,063 | 2 | 0 | 2 | 1 |
| Case 103 | 12 | 191,619     | 34,853,011  | 2 | 1 | 3 | 0 |
| Case 103 | 12 | 37,876,400  | 133,810,935 | 2 | 1 | 3 | 0 |
| Case 103 | 13 | 19,058,717  | 115,103,529 | 2 | 1 | 3 | 0 |
| Case 103 | 14 | 19,280,733  | 21,345,707  | 2 | 2 | 4 | 0 |
| Case 103 | 14 | 21,348,256  | 21,413,602  | 3 | 2 | 5 | 0 |
| Case 103 | 14 | 21,421,088  | 21,607,930  | 2 | 1 | 3 | 0 |
| Case 103 | 14 | 21,618,292  | 22,530,493  | 2 | 2 | 4 | 0 |
| Case 103 | 14 | 22,533,857  | 22,964,782  | 3 | 2 | 5 | 0 |
| Case 103 | 14 | 22,966,662  | 107,287,663 | 2 | 2 | 4 | 0 |
| Case 103 | 15 | 20,034,919  | 102,461,162 | 2 | 1 | 3 | 0 |
| Case 103 | 16 | 88,165      | 3,789,537   | 1 | 1 | 2 | 0 |
| Case 103 | 16 | 3,790,186   | 35,285,582  | 2 | 1 | 3 | 0 |
| Case 103 | 16 | 46,450,037  | 90,274,695  | 2 | 1 | 3 | 0 |
| Case 103 | 17 | 11,885      | 22,242,355  | 3 | 0 | 3 | 1 |
| Case 103 | 17 | 25,268,142  | 25,295,032  | 3 | 0 | 3 | 1 |
| Case 103 | 17 | 25,329,949  | 72,739,283  | 2 | 1 | 3 | 0 |
| Case 103 | 17 | 72,739,304  | 77,753,296  | 2 | 0 | 2 | 1 |
| Case 103 | 17 | 77,753,442  | 81,060,040  | 2 | 1 | 3 | 0 |
| Case 103 | 18 | 87,505      | 15,375,878  | 2 | 1 | 3 | 0 |
| Case 103 | 18 | 18,520,354  | 65,213,012  | 2 | 1 | 3 | 0 |
| Case 103 | 18 | 65,214,082  | 65,257,867  | 1 | 0 | 1 | 0 |
| Case 103 | 18 | 65,258,604  | 78,015,180  | 2 | 1 | 3 | 0 |
| Case 103 | 19 | 260,912     | 24,629,285  | 2 | 1 | 3 | 0 |
| Case 103 | 19 | 27,732,159  | 35,454,215  | 2 | 1 | 3 | 0 |
| Case 103 | 19 | 35,465,187  | 35,482,114  | 4 | 3 | 7 | 0 |
| Case 103 | 19 | 35,482,604  | 59,097,160  | 2 | 1 | 3 | 0 |
| Case 103 | 20 | 63,244      | 6,093,090   | 3 | 2 | 5 | 0 |
| Case 103 | 20 | 6,093,177   | 23,181,354  | 4 | 2 | 6 | 0 |
| Case 103 | 20 | 23,184,487  | 26,293,985  | 3 | 1 | 4 | 0 |
| Case 103 | 20 | 29,425,357  | 37,320,416  | 3 | 1 | 4 | 0 |
| Case 103 | 20 | 37,322,023  | 47,092,846  | 3 | 2 | 5 | 0 |
| Case 103 | 20 | 47,093,312  | 47,109,600  | 2 | 1 | 3 | 0 |
| Case 103 | 20 | 47,110,130  | 60,427,918  | 3 | 2 | 5 | 0 |
| Case 103 | 20 | 60,435,482  | 62,948,788  | 3 | 1 | 4 | 0 |
| Case 103 | 21 | 10,827,533  | 10,971,337  | 2 | 1 | 3 | 0 |
| Case 103 | 21 | 14,368,320  | 48,100,155  | 2 | 1 | 3 | 0 |
| Case 103 | 22 | 16,114,244  | 51,195,728  | 2 | 1 | 3 | 0 |
| Case 103 | X  | 2,700,157   | 2,799,191   | 0 | 0 | 0 | 0 |
| Case 103 | X  | 2,799,240   | 7,280,998   | 2 | 0 | 2 | 1 |
| Case 103 | X  | 7,311,886   | 7,517,325   | 0 | 0 | 0 | 0 |
| Case 103 | X  | 7,537,276   | 58,488,110  | 2 | 0 | 2 | 1 |
| Case 103 | X  | 61,694,576  | 154,898,561 | 2 | 0 | 2 | 1 |
| Case 104 | 1  | 82,154      | 1,017,587   | 1 | 1 | 2 | 0 |
| Case 104 | 1  | 1,018,704   | 30,496,615  | 2 | 1 | 3 | 0 |
| Case 104 | 1  | 30,496,978  | 30,830,505  | 2 | 0 | 2 | 1 |
| Case 104 | 1  | 30,843,915  | 32,631,319  | 1 | 1 | 2 | 0 |
| Case 104 | 1  | 32,635,410  | 32,879,586  | 1 | 0 | 1 | 0 |
| Case 104 | 1  | 32,889,223  | 33,694,810  | 2 | 1 | 3 | 0 |
| Case 104 | 1  | 33,710,429  | 34,082,279  | 3 | 1 | 4 | 0 |
| Case 104 | 1  | 34,089,394  | 121,346,616 | 2 | 1 | 3 | 0 |
| Case 104 | 1  | 142,649,718 | 151,325,055 | 3 | 0 | 3 | 1 |
| Case 104 | 1  | 151,327,376 | 151,414,577 | 5 | 0 | 5 | 1 |
| Case 104 | 1  | 151,414,611 | 199,442,312 | 3 | 0 | 3 | 1 |

|          |   |             |             |    |   |    |   |
|----------|---|-------------|-------------|----|---|----|---|
| Case 104 | 1 | 199,445,517 | 249,218,992 | 4  | 0 | 4  | 1 |
| Case 104 | 2 | 18,674      | 76,236,858  | 2  | 1 | 3  | 0 |
| Case 104 | 2 | 76,240,260  | 76,464,500  | 1  | 0 | 1  | 0 |
| Case 104 | 2 | 76,468,390  | 92,081,640  | 2  | 1 | 3  | 0 |
| Case 104 | 2 | 95,429,424  | 96,385,848  | 2  | 1 | 3  | 0 |
| Case 104 | 2 | 96,391,109  | 99,546,423  | 3  | 0 | 3  | 1 |
| Case 104 | 2 | 99,548,333  | 99,881,228  | 2  | 1 | 3  | 0 |
| Case 104 | 2 | 99,898,998  | 100,511,660 | 2  | 0 | 2  | 1 |
| Case 104 | 2 | 100,516,134 | 101,595,475 | 2  | 1 | 3  | 0 |
| Case 104 | 2 | 101,596,624 | 101,706,787 | 2  | 0 | 2  | 1 |
| Case 104 | 2 | 101,710,796 | 105,314,970 | 2  | 1 | 3  | 0 |
| Case 104 | 2 | 105,335,047 | 106,579,871 | 2  | 0 | 2  | 1 |
| Case 104 | 2 | 106,582,663 | 106,954,287 | 2  | 1 | 3  | 0 |
| Case 104 | 2 | 106,965,073 | 108,717,242 | 3  | 0 | 3  | 1 |
| Case 104 | 2 | 108,722,210 | 115,386,455 | 2  | 1 | 3  | 0 |
| Case 104 | 2 | 115,388,286 | 115,946,323 | 2  | 0 | 2  | 1 |
| Case 104 | 2 | 115,948,786 | 118,274,002 | 2  | 1 | 3  | 0 |
| Case 104 | 2 | 118,281,844 | 118,827,810 | 3  | 0 | 3  | 1 |
| Case 104 | 2 | 118,827,859 | 119,429,297 | 2  | 1 | 3  | 0 |
| Case 104 | 2 | 119,435,628 | 121,303,240 | 2  | 0 | 2  | 1 |
| Case 104 | 2 | 121,303,783 | 123,548,703 | 2  | 1 | 3  | 0 |
| Case 104 | 2 | 123,556,119 | 129,163,372 | 2  | 0 | 2  | 1 |
| Case 104 | 2 | 129,171,305 | 129,358,528 | 2  | 1 | 3  | 0 |
| Case 104 | 2 | 129,360,694 | 134,935,979 | 2  | 0 | 2  | 1 |
| Case 104 | 2 | 134,939,315 | 135,711,516 | 2  | 1 | 3  | 0 |
| Case 104 | 2 | 135,711,657 | 136,937,513 | 2  | 0 | 2  | 1 |
| Case 104 | 2 | 136,944,990 | 137,059,906 | 2  | 1 | 3  | 0 |
| Case 104 | 2 | 137,061,077 | 141,707,868 | 3  | 0 | 3  | 1 |
| Case 104 | 2 | 141,709,406 | 142,119,402 | 2  | 1 | 3  | 0 |
| Case 104 | 2 | 142,124,008 | 143,290,897 | 2  | 0 | 2  | 1 |
| Case 104 | 2 | 143,291,667 | 143,799,647 | 2  | 1 | 3  | 0 |
| Case 104 | 2 | 143,799,730 | 149,270,710 | 2  | 0 | 2  | 1 |
| Case 104 | 2 | 149,271,144 | 150,146,800 | 2  | 1 | 3  | 0 |
| Case 104 | 2 | 150,147,278 | 157,552,860 | 2  | 0 | 2  | 1 |
| Case 104 | 2 | 157,558,583 | 159,196,789 | 2  | 1 | 3  | 0 |
| Case 104 | 2 | 159,196,848 | 159,444,459 | 2  | 0 | 2  | 1 |
| Case 104 | 2 | 159,446,818 | 166,940,925 | 2  | 1 | 3  | 0 |
| Case 104 | 2 | 166,941,405 | 168,426,623 | 3  | 0 | 3  | 1 |
| Case 104 | 2 | 168,434,795 | 175,776,383 | 2  | 1 | 3  | 0 |
| Case 104 | 2 | 175,779,805 | 177,115,852 | 3  | 0 | 3  | 1 |
| Case 104 | 2 | 177,124,224 | 181,772,262 | 2  | 1 | 3  | 0 |
| Case 104 | 2 | 181,784,642 | 183,608,627 | 2  | 0 | 2  | 1 |
| Case 104 | 2 | 183,614,670 | 185,865,740 | 2  | 1 | 3  | 0 |
| Case 104 | 2 | 185,905,031 | 187,805,130 | 2  | 0 | 2  | 1 |
| Case 104 | 2 | 187,808,330 | 194,250,514 | 2  | 1 | 3  | 0 |
| Case 104 | 2 | 194,275,048 | 196,699,007 | 2  | 0 | 2  | 1 |
| Case 104 | 2 | 196,702,403 | 198,809,975 | 2  | 1 | 3  | 0 |
| Case 104 | 2 | 198,819,824 | 217,208,571 | 3  | 0 | 3  | 1 |
| Case 104 | 2 | 217,209,138 | 243,048,760 | 2  | 0 | 2  | 1 |
| Case 104 | 3 | 61,495      | 23,002,974  | 2  | 2 | 4  | 0 |
| Case 104 | 3 | 23,003,050  | 23,218,126  | 2  | 1 | 3  | 0 |
| Case 104 | 3 | 23,221,931  | 60,983,267  | 2  | 0 | 2  | 1 |
| Case 104 | 3 | 60,992,932  | 61,215,497  | 1  | 0 | 1  | 0 |
| Case 104 | 3 | 61,216,475  | 90,442,925  | 3  | 0 | 3  | 1 |
| Case 104 | 3 | 93,537,290  | 94,141,590  | 3  | 0 | 3  | 1 |
| Case 104 | 3 | 94,146,460  | 94,335,368  | 4  | 2 | 6  | 0 |
| Case 104 | 3 | 94,339,867  | 165,210,453 | 3  | 0 | 3  | 1 |
| Case 104 | 3 | 165,211,894 | 168,615,125 | 11 | 2 | 13 | 0 |
| Case 104 | 3 | 168,621,773 | 169,316,020 | 9  | 2 | 11 | 0 |
| Case 104 | 3 | 169,320,058 | 171,103,807 | 10 | 1 | 11 | 0 |
| Case 104 | 3 | 171,109,146 | 197,838,262 | 3  | 0 | 3  | 1 |

|          |   |             |             |   |   |   |   |
|----------|---|-------------|-------------|---|---|---|---|
| Case 104 | 4 | 71,566      | 3,715,551   | 1 | 1 | 2 | 0 |
| Case 104 | 4 | 3,718,394   | 3,753,417   | 1 | 0 | 1 | 0 |
| Case 104 | 4 | 3,754,818   | 26,986,737  | 2 | 1 | 3 | 0 |
| Case 104 | 4 | 26,987,761  | 49,620,898  | 1 | 1 | 2 | 0 |
| Case 104 | 4 | 52,697,856  | 91,433,794  | 1 | 1 | 2 | 0 |
| Case 104 | 4 | 91,460,581  | 91,606,389  | 2 | 1 | 3 | 0 |
| Case 104 | 4 | 91,607,363  | 106,052,258 | 1 | 1 | 2 | 0 |
| Case 104 | 4 | 106,061,534 | 106,681,251 | 1 | 0 | 1 | 0 |
| Case 104 | 4 | 106,687,733 | 132,902,055 | 2 | 1 | 3 | 0 |
| Case 104 | 4 | 132,914,907 | 133,093,090 | 2 | 0 | 2 | 1 |
| Case 104 | 4 | 133,101,094 | 160,751,151 | 2 | 1 | 3 | 0 |
| Case 104 | 4 | 160,753,524 | 190,963,766 | 1 | 0 | 1 | 0 |
| Case 104 | 5 | 38,139      | 4,532,227   | 2 | 0 | 2 | 1 |
| Case 104 | 5 | 4,534,191   | 28,147,535  | 1 | 0 | 1 | 0 |
| Case 104 | 5 | 28,171,050  | 46,399,093  | 1 | 1 | 2 | 0 |
| Case 104 | 5 | 49,457,282  | 49,470,083  | 1 | 1 | 2 | 0 |
| Case 104 | 5 | 49,492,838  | 50,313,870  | 2 | 1 | 3 | 0 |
| Case 104 | 5 | 50,318,550  | 51,762,532  | 2 | 0 | 2 | 1 |
| Case 104 | 5 | 51,774,963  | 62,853,232  | 2 | 1 | 3 | 0 |
| Case 104 | 5 | 62,855,619  | 95,516,072  | 2 | 0 | 2 | 1 |
| Case 104 | 5 | 95,524,899  | 95,684,541  | 2 | 1 | 3 | 0 |
| Case 104 | 5 | 95,685,235  | 128,556,817 | 2 | 0 | 2 | 1 |
| Case 104 | 5 | 128,565,893 | 180,693,127 | 2 | 1 | 3 | 0 |
| Case 104 | 6 | 108,666     | 13,980,833  | 2 | 0 | 2 | 1 |
| Case 104 | 6 | 13,995,112  | 16,387,421  | 1 | 0 | 1 | 0 |
| Case 104 | 6 | 16,387,803  | 29,339,271  | 2 | 0 | 2 | 1 |
| Case 104 | 6 | 29,341,007  | 30,469,190  | 4 | 1 | 5 | 0 |
| Case 104 | 6 | 30,470,301  | 31,583,312  | 5 | 1 | 6 | 0 |
| Case 104 | 6 | 31,583,313  | 32,292,715  | 4 | 1 | 5 | 0 |
| Case 104 | 6 | 32,293,152  | 58,752,089  | 2 | 1 | 3 | 0 |
| Case 104 | 6 | 61,891,118  | 115,068,368 | 2 | 1 | 3 | 0 |
| Case 104 | 6 | 115,080,182 | 144,968,195 | 2 | 2 | 4 | 0 |
| Case 104 | 6 | 144,980,551 | 162,571,263 | 2 | 1 | 3 | 0 |
| Case 104 | 6 | 162,577,258 | 162,820,114 | 2 | 0 | 2 | 1 |
| Case 104 | 6 | 162,828,829 | 164,988,133 | 2 | 1 | 3 | 0 |
| Case 104 | 6 | 164,988,737 | 165,275,034 | 3 | 1 | 4 | 0 |
| Case 104 | 6 | 165,276,034 | 170,980,171 | 2 | 1 | 3 | 0 |
| Case 104 | 7 | 44,935      | 3,125,512   | 2 | 1 | 3 | 0 |
| Case 104 | 7 | 3,126,241   | 3,344,986   | 2 | 2 | 4 | 0 |
| Case 104 | 7 | 3,349,625   | 58,019,061  | 2 | 1 | 3 | 0 |
| Case 104 | 7 | 61,056,053  | 62,577,770  | 2 | 1 | 3 | 0 |
| Case 104 | 7 | 62,627,173  | 70,426,380  | 2 | 2 | 4 | 0 |
| Case 104 | 7 | 70,434,205  | 149,458,128 | 3 | 0 | 3 | 1 |
| Case 104 | 7 | 149,460,447 | 159,119,486 | 2 | 0 | 2 | 1 |
| Case 104 | 8 | 164,984     | 4,988,269   | 2 | 2 | 4 | 0 |
| Case 104 | 8 | 4,989,141   | 15,791,633  | 3 | 2 | 5 | 0 |
| Case 104 | 8 | 15,792,451  | 16,985,962  | 4 | 2 | 6 | 0 |
| Case 104 | 8 | 16,987,102  | 20,547,149  | 3 | 2 | 5 | 0 |
| Case 104 | 8 | 20,548,817  | 40,462,615  | 2 | 2 | 4 | 0 |
| Case 104 | 8 | 40,465,121  | 41,488,652  | 2 | 1 | 3 | 0 |
| Case 104 | 8 | 41,496,007  | 42,099,392  | 4 | 1 | 5 | 0 |
| Case 104 | 8 | 42,100,552  | 43,791,691  | 3 | 2 | 5 | 0 |
| Case 104 | 8 | 46,886,735  | 51,769,869  | 3 | 2 | 5 | 0 |
| Case 104 | 8 | 51,772,697  | 97,125,941  | 3 | 3 | 6 | 0 |
| Case 104 | 8 | 97,126,738  | 108,122,180 | 3 | 2 | 5 | 0 |
| Case 104 | 8 | 108,124,063 | 140,720,163 | 3 | 3 | 6 | 0 |
| Case 104 | 8 | 140,720,412 | 146,293,414 | 2 | 2 | 4 | 0 |
| Case 104 | 9 | 46,587      | 26,059,028  | 3 | 0 | 3 | 1 |
| Case 104 | 9 | 26,059,720  | 26,699,111  | 2 | 0 | 2 | 1 |
| Case 104 | 9 | 26,705,815  | 46,944,322  | 3 | 0 | 3 | 1 |
| Case 104 | 9 | 65,629,772  | 141,066,491 | 2 | 0 | 2 | 1 |



|          |    |             |             |   |   |   |   |
|----------|----|-------------|-------------|---|---|---|---|
| Case 104 | 10 | 98,087      | 3,733,386   | 2 | 0 | 2 | 1 |
| Case 104 | 10 | 3,733,731   | 4,564,553   | 3 | 2 | 5 | 0 |
| Case 104 | 10 | 4,576,042   | 4,672,693   | 4 | 2 | 6 | 0 |
| Case 104 | 10 | 4,674,335   | 38,672,399  | 2 | 2 | 4 | 0 |
| Case 104 | 10 | 38,674,609  | 39,097,912  | 2 | 0 | 2 | 1 |
| Case 104 | 10 | 42,436,301  | 70,641,860  | 2 | 0 | 2 | 1 |
| Case 104 | 10 | 70,644,115  | 135,477,883 | 3 | 0 | 3 | 1 |
| Case 104 | 11 | 193,146     | 1,909,006   | 2 | 0 | 2 | 1 |
| Case 104 | 11 | 1,911,439   | 5,876,325   | 3 | 0 | 3 | 1 |
| Case 104 | 11 | 5,877,909   | 5,959,757   | 5 | 0 | 5 | 1 |
| Case 104 | 11 | 5,960,036   | 21,052,712  | 3 | 0 | 3 | 1 |
| Case 104 | 11 | 21,053,214  | 26,413,098  | 2 | 0 | 2 | 1 |
| Case 104 | 11 | 26,427,359  | 36,994,253  | 3 | 0 | 3 | 1 |
| Case 104 | 11 | 36,995,113  | 38,922,899  | 1 | 0 | 1 | 0 |
| Case 104 | 11 | 38,932,160  | 40,357,253  | 1 | 1 | 2 | 0 |
| Case 104 | 11 | 40,357,510  | 51,591,253  | 2 | 1 | 3 | 0 |
| Case 104 | 11 | 54,794,237  | 62,789,763  | 2 | 1 | 3 | 0 |
| Case 104 | 11 | 62,794,074  | 62,931,254  | 3 | 2 | 5 | 0 |
| Case 104 | 11 | 62,931,484  | 67,842,185  | 2 | 1 | 3 | 0 |
| Case 104 | 11 | 67,846,196  | 67,897,483  | 4 | 2 | 6 | 0 |
| Case 104 | 11 | 67,908,805  | 78,360,321  | 2 | 1 | 3 | 0 |
| Case 104 | 11 | 78,360,830  | 78,704,703  | 2 | 0 | 2 | 1 |
| Case 104 | 11 | 78,706,607  | 85,200,968  | 2 | 1 | 3 | 0 |
| Case 104 | 11 | 85,206,156  | 85,495,269  | 3 | 1 | 4 | 0 |
| Case 104 | 11 | 85,504,913  | 87,601,746  | 2 | 1 | 3 | 0 |
| Case 104 | 11 | 87,605,130  | 91,443,021  | 3 | 1 | 4 | 0 |
| Case 104 | 11 | 91,443,158  | 98,427,125  | 2 | 1 | 3 | 0 |
| Case 104 | 11 | 98,429,292  | 101,086,219 | 2 | 0 | 2 | 1 |
| Case 104 | 11 | 101,098,195 | 111,720,072 | 2 | 1 | 3 | 0 |
| Case 104 | 11 | 111,724,133 | 113,892,617 | 1 | 1 | 2 | 0 |
| Case 104 | 11 | 113,902,210 | 127,313,452 | 2 | 1 | 3 | 0 |
| Case 104 | 11 | 127,315,468 | 134,934,063 | 1 | 0 | 1 | 0 |
| Case 104 | 12 | 191,619     | 29,180,359  | 1 | 1 | 2 | 0 |
| Case 104 | 12 | 29,181,450  | 29,338,429  | 5 | 1 | 6 | 0 |
| Case 104 | 12 | 29,339,378  | 34,853,011  | 2 | 1 | 3 | 0 |
| Case 104 | 12 | 37,876,400  | 115,134,529 | 2 | 1 | 3 | 0 |
| Case 104 | 12 | 115,135,430 | 133,810,935 | 3 | 1 | 4 | 0 |
| Case 104 | 13 | 19,058,717  | 115,103,529 | 3 | 0 | 3 | 1 |
| Case 104 | 14 | 19,280,733  | 22,461,595  | 2 | 1 | 3 | 0 |
| Case 104 | 14 | 22,465,075  | 23,006,908  | 3 | 2 | 5 | 0 |
| Case 104 | 14 | 23,009,999  | 34,404,727  | 2 | 1 | 3 | 0 |
| Case 104 | 14 | 34,407,324  | 40,279,139  | 3 | 1 | 4 | 0 |
| Case 104 | 14 | 40,282,613  | 75,078,428  | 1 | 1 | 2 | 0 |
| Case 104 | 14 | 75,078,538  | 107,287,663 | 2 | 1 | 3 | 0 |
| Case 104 | 15 | 20,034,919  | 102,461,162 | 2 | 1 | 3 | 0 |
| Case 104 | 16 | 88,165      | 5,194,458   | 2 | 0 | 2 | 1 |
| Case 104 | 16 | 5,196,741   | 35,285,582  | 2 | 1 | 3 | 0 |
| Case 104 | 16 | 46,450,037  | 74,339,302  | 3 | 0 | 3 | 1 |
| Case 104 | 16 | 74,339,320  | 77,959,075  | 2 | 0 | 2 | 1 |
| Case 104 | 16 | 77,959,692  | 78,045,800  | 2 | 1 | 3 | 0 |
| Case 104 | 16 | 78,047,986  | 78,386,295  | 1 | 0 | 1 | 0 |
| Case 104 | 16 | 78,387,304  | 90,274,695  | 2 | 0 | 2 | 1 |
| Case 104 | 17 | 11,885      | 22,242,355  | 3 | 0 | 3 | 1 |
| Case 104 | 17 | 25,268,142  | 25,268,142  | 3 | 0 | 3 | 1 |
| Case 104 | 17 | 25,295,032  | 38,775,150  | 2 | 1 | 3 | 0 |
| Case 104 | 17 | 38,776,406  | 40,861,424  | 2 | 0 | 2 | 1 |
| Case 104 | 17 | 40,862,647  | 73,494,391  | 3 | 0 | 3 | 1 |
| Case 104 | 17 | 73,494,400  | 74,014,468  | 2 | 0 | 2 | 1 |
| Case 104 | 17 | 74,014,634  | 81,060,040  | 3 | 0 | 3 | 1 |
| Case 104 | 18 | 87,505      | 11,371,130  | 2 | 0 | 2 | 1 |
| Case 104 | 18 | 11,377,526  | 15,375,878  | 3 | 0 | 3 | 1 |

|          |    |             |             |    |   |    |   |
|----------|----|-------------|-------------|----|---|----|---|
| Case 104 | 18 | 18,520,354  | 21,747,400  | 3  | 0 | 3  | 1 |
| Case 104 | 18 | 21,749,615  | 24,593,543  | 2  | 0 | 2  | 1 |
| Case 104 | 18 | 24,594,258  | 33,130,928  | 1  | 0 | 1  | 0 |
| Case 104 | 18 | 33,133,859  | 61,246,964  | 2  | 0 | 2  | 1 |
| Case 104 | 18 | 61,246,975  | 71,268,755  | 1  | 0 | 1  | 0 |
| Case 104 | 18 | 71,270,811  | 78,015,180  | 2  | 0 | 2  | 1 |
| Case 104 | 19 | 260,912     | 2,833,682   | 2  | 0 | 2  | 1 |
| Case 104 | 19 | 2,833,745   | 3,769,049   | 2  | 1 | 3  | 0 |
| Case 104 | 19 | 3,771,586   | 10,429,859  | 2  | 0 | 2  | 1 |
| Case 104 | 19 | 10,431,344  | 11,448,042  | 2  | 1 | 3  | 0 |
| Case 104 | 19 | 11,453,547  | 15,143,453  | 2  | 0 | 2  | 1 |
| Case 104 | 19 | 15,151,718  | 16,890,243  | 2  | 1 | 3  | 0 |
| Case 104 | 19 | 16,890,268  | 24,629,285  | 2  | 0 | 2  | 1 |
| Case 104 | 19 | 27,732,159  | 59,097,160  | 2  | 0 | 2  | 1 |
| Case 104 | 20 | 63,244      | 26,293,985  | 3  | 0 | 3  | 1 |
| Case 104 | 20 | 29,425,357  | 29,834,107  | 3  | 1 | 4  | 0 |
| Case 104 | 20 | 29,843,182  | 58,552,125  | 4  | 1 | 5  | 0 |
| Case 104 | 20 | 58,552,164  | 62,948,788  | 3  | 1 | 4  | 0 |
| Case 104 | 21 | 10,827,533  | 10,971,337  | 2  | 1 | 3  | 0 |
| Case 104 | 21 | 14,368,320  | 48,100,155  | 2  | 1 | 3  | 0 |
| Case 104 | 22 | 16,114,244  | 51,195,728  | 2  | 0 | 2  | 1 |
| Case 104 | X  | 2,700,157   | 44,327,594  | 2  | 0 | 2  | 1 |
| Case 104 | X  | 44,328,334  | 44,362,363  | 1  | 0 | 1  | 0 |
| Case 104 | X  | 44,376,692  | 57,515,439  | 2  | 0 | 2  | 1 |
| Case 104 | X  | 57,536,670  | 57,913,685  | 1  | 0 | 1  | 0 |
| Case 104 | X  | 57,928,734  | 58,488,110  | 2  | 0 | 2  | 1 |
| Case 104 | X  | 61,694,576  | 75,387,426  | 2  | 0 | 2  | 1 |
| Case 104 | X  | 75,393,454  | 82,041,981  | 3  | 2 | 5  | 0 |
| Case 104 | X  | 82,051,198  | 85,886,031  | 5  | 2 | 7  | 0 |
| Case 104 | X  | 85,886,924  | 89,404,699  | 6  | 2 | 8  | 0 |
| Case 104 | X  | 89,413,918  | 118,151,505 | 2  | 0 | 2  | 1 |
| Case 104 | X  | 118,158,367 | 119,750,935 | 5  | 1 | 6  | 0 |
| Case 104 | X  | 119,758,810 | 120,862,978 | 13 | 1 | 14 | 0 |
| Case 104 | X  | 120,868,711 | 121,532,885 | 22 | 0 | 22 | 1 |
| Case 104 | X  | 121,545,403 | 154,898,561 | 2  | 0 | 2  | 1 |
| Case 105 | 1  | 82,154      | 1,064,979   | 7  | 0 | 7  | 1 |
| Case 105 | 1  | 1,066,403   | 3,616,601   | 6  | 0 | 6  | 1 |
| Case 105 | 1  | 3,628,677   | 5,723,643   | 6  | 1 | 7  | 0 |
| Case 105 | 1  | 5,724,940   | 6,635,420   | 5  | 1 | 6  | 0 |
| Case 105 | 1  | 6,635,448   | 7,655,998   | 4  | 1 | 5  | 0 |
| Case 105 | 1  | 7,667,122   | 87,774,994  | 2  | 1 | 3  | 0 |
| Case 105 | 1  | 87,781,157  | 91,406,859  | 6  | 1 | 7  | 0 |
| Case 105 | 1  | 91,418,026  | 121,346,616 | 3  | 1 | 4  | 0 |
| Case 105 | 1  | 142,649,718 | 162,371,870 | 4  | 2 | 6  | 0 |
| Case 105 | 1  | 162,374,809 | 200,776,641 | 5  | 2 | 7  | 0 |
| Case 105 | 1  | 200,780,153 | 214,842,590 | 4  | 2 | 6  | 0 |
| Case 105 | 1  | 214,847,804 | 214,868,909 | 7  | 3 | 10 | 0 |
| Case 105 | 1  | 214,883,583 | 223,141,491 | 5  | 2 | 7  | 0 |
| Case 105 | 1  | 223,147,097 | 237,307,601 | 4  | 2 | 6  | 0 |
| Case 105 | 1  | 237,310,235 | 247,580,568 | 5  | 2 | 7  | 0 |
| Case 105 | 1  | 247,581,209 | 249,218,992 | 5  | 1 | 6  | 0 |
| Case 105 | 2  | 18,674      | 9,908,651   | 3  | 2 | 5  | 0 |
| Case 105 | 2  | 9,908,901   | 31,014,166  | 2  | 2 | 4  | 0 |
| Case 105 | 2  | 31,016,084  | 31,037,485  | 3  | 3 | 6  | 0 |
| Case 105 | 2  | 31,048,617  | 92,081,640  | 2  | 2 | 4  | 0 |
| Case 105 | 2  | 95,429,424  | 134,606,584 | 2  | 2 | 4  | 0 |
| Case 105 | 2  | 134,607,680 | 134,638,499 | 3  | 2 | 5  | 0 |
| Case 105 | 2  | 134,639,305 | 147,559,341 | 2  | 2 | 4  | 0 |
| Case 105 | 2  | 147,586,507 | 180,324,063 | 2  | 1 | 3  | 0 |
| Case 105 | 2  | 180,329,583 | 180,681,868 | 4  | 1 | 5  | 0 |
| Case 105 | 2  | 180,684,202 | 182,580,567 | 2  | 1 | 3  | 0 |

|          |   |             |             |    |   |    |   |
|----------|---|-------------|-------------|----|---|----|---|
| Case 105 | 2 | 182,581,492 | 242,942,878 | 3  | 1 | 4  | 0 |
| Case 105 | 2 | 242,945,309 | 243,048,760 | 4  | 1 | 5  | 0 |
| Case 105 | 3 | 61,495      | 68,457,521  | 2  | 1 | 3  | 0 |
| Case 105 | 3 | 68,457,880  | 68,472,602  | 4  | 2 | 6  | 0 |
| Case 105 | 3 | 68,474,875  | 90,442,925  | 2  | 1 | 3  | 0 |
| Case 105 | 3 | 93,537,290  | 130,340,704 | 2  | 1 | 3  | 0 |
| Case 105 | 3 | 130,345,381 | 130,409,494 | 2  | 0 | 2  | 1 |
| Case 105 | 3 | 130,422,592 | 197,838,262 | 2  | 1 | 3  | 0 |
| Case 105 | 4 | 71,566      | 2,273,411   | 1  | 1 | 2  | 0 |
| Case 105 | 4 | 2,275,145   | 26,121,018  | 2  | 1 | 3  | 0 |
| Case 105 | 4 | 26,132,361  | 31,005,966  | 5  | 1 | 6  | 0 |
| Case 105 | 4 | 31,012,310  | 31,271,863  | 7  | 1 | 8  | 0 |
| Case 105 | 4 | 31,277,116  | 32,227,281  | 10 | 1 | 11 | 0 |
| Case 105 | 4 | 32,240,417  | 36,915,898  | 8  | 1 | 9  | 0 |
| Case 105 | 4 | 36,916,955  | 39,611,046  | 3  | 1 | 4  | 0 |
| Case 105 | 4 | 39,614,823  | 49,620,898  | 2  | 1 | 3  | 0 |
| Case 105 | 4 | 52,697,856  | 91,900,701  | 2  | 1 | 3  | 0 |
| Case 105 | 4 | 91,902,620  | 92,063,883  | 2  | 0 | 2  | 1 |
| Case 105 | 4 | 92,066,776  | 189,070,726 | 2  | 1 | 3  | 0 |
| Case 105 | 4 | 189,081,654 | 190,963,766 | 2  | 0 | 2  | 1 |
| Case 105 | 5 | 38,139      | 2,582,828   | 2  | 1 | 3  | 0 |
| Case 105 | 5 | 2,586,224   | 2,625,833   | 2  | 0 | 2  | 1 |
| Case 105 | 5 | 2,627,075   | 22,219,836  | 2  | 1 | 3  | 0 |
| Case 105 | 5 | 22,222,461  | 26,299,629  | 3  | 1 | 4  | 0 |
| Case 105 | 5 | 26,322,668  | 29,193,998  | 2  | 1 | 3  | 0 |
| Case 105 | 5 | 29,211,937  | 46,399,093  | 3  | 1 | 4  | 0 |
| Case 105 | 5 | 49,457,282  | 49,457,282  | 3  | 1 | 4  | 0 |
| Case 105 | 5 | 49,470,083  | 97,916,570  | 2  | 1 | 3  | 0 |
| Case 105 | 5 | 97,918,829  | 105,866,862 | 1  | 1 | 2  | 0 |
| Case 105 | 5 | 105,876,806 | 174,498,941 | 2  | 1 | 3  | 0 |
| Case 105 | 5 | 174,507,231 | 180,693,127 | 1  | 1 | 2  | 0 |
| Case 105 | 6 | 108,666     | 30,993,866  | 3  | 2 | 5  | 0 |
| Case 105 | 6 | 30,993,880  | 30,998,742  | 1  | 1 | 2  | 0 |
| Case 105 | 6 | 30,998,879  | 32,439,508  | 3  | 2 | 5  | 0 |
| Case 105 | 6 | 32,439,828  | 32,671,521  | 3  | 1 | 4  | 0 |
| Case 105 | 6 | 32,672,082  | 40,634,681  | 3  | 2 | 5  | 0 |
| Case 105 | 6 | 40,637,653  | 41,433,215  | 13 | 0 | 13 | 1 |
| Case 105 | 6 | 41,434,817  | 42,975,462  | 11 | 0 | 11 | 1 |
| Case 105 | 6 | 42,976,232  | 43,875,449  | 9  | 0 | 9  | 1 |
| Case 105 | 6 | 43,882,612  | 44,943,982  | 11 | 0 | 11 | 1 |
| Case 105 | 6 | 44,944,642  | 48,454,655  | 4  | 2 | 6  | 0 |
| Case 105 | 6 | 48,480,264  | 49,191,974  | 5  | 2 | 7  | 0 |
| Case 105 | 6 | 49,198,849  | 56,067,109  | 4  | 2 | 6  | 0 |
| Case 105 | 6 | 56,068,448  | 58,752,089  | 3  | 2 | 5  | 0 |
| Case 105 | 6 | 61,891,118  | 62,922,848  | 3  | 2 | 5  | 0 |
| Case 105 | 6 | 62,972,521  | 170,980,171 | 2  | 2 | 4  | 0 |
| Case 105 | 7 | 44,935      | 7,267,787   | 4  | 1 | 5  | 0 |
| Case 105 | 7 | 7,268,431   | 20,680,353  | 5  | 1 | 6  | 0 |
| Case 105 | 7 | 20,680,449  | 41,519,812  | 4  | 1 | 5  | 0 |
| Case 105 | 7 | 41,524,795  | 58,019,061  | 4  | 0 | 4  | 1 |
| Case 105 | 7 | 61,056,053  | 62,729,224  | 4  | 0 | 4  | 1 |
| Case 105 | 7 | 62,777,355  | 65,202,326  | 2  | 0 | 2  | 1 |
| Case 105 | 7 | 65,203,587  | 139,421,180 | 3  | 0 | 3  | 1 |
| Case 105 | 7 | 139,434,215 | 139,754,482 | 2  | 0 | 2  | 1 |
| Case 105 | 7 | 139,757,136 | 149,446,246 | 3  | 0 | 3  | 1 |
| Case 105 | 7 | 149,450,379 | 149,530,894 | 2  | 0 | 2  | 1 |
| Case 105 | 7 | 149,536,214 | 159,119,486 | 3  | 0 | 3  | 1 |
| Case 105 | 8 | 164,984     | 9,526,345   | 2  | 0 | 2  | 1 |
| Case 105 | 8 | 9,527,707   | 15,395,144  | 3  | 0 | 3  | 1 |
| Case 105 | 8 | 15,400,574  | 15,420,894  | 0  | 0 | 0  | 0 |
| Case 105 | 8 | 15,422,664  | 18,479,776  | 3  | 0 | 3  | 1 |

|          |    |             |             |    |   |    |   |
|----------|----|-------------|-------------|----|---|----|---|
| Case 105 | 8  | 18,482,596  | 18,621,332  | 2  | 0 | 2  | 1 |
| Case 105 | 8  | 18,622,985  | 38,135,412  | 3  | 0 | 3  | 1 |
| Case 105 | 8  | 38,139,034  | 40,033,476  | 5  | 2 | 7  | 0 |
| Case 105 | 8  | 40,039,431  | 43,162,118  | 3  | 2 | 5  | 0 |
| Case 105 | 8  | 43,171,055  | 43,791,691  | 5  | 2 | 7  | 0 |
| Case 105 | 8  | 46,886,735  | 46,886,735  | 5  | 2 | 7  | 0 |
| Case 105 | 8  | 46,942,842  | 60,383,409  | 3  | 2 | 5  | 0 |
| Case 105 | 8  | 60,388,601  | 70,186,364  | 2  | 1 | 3  | 0 |
| Case 105 | 8  | 70,188,775  | 89,529,961  | 3  | 1 | 4  | 0 |
| Case 105 | 8  | 89,530,078  | 99,057,903  | 3  | 2 | 5  | 0 |
| Case 105 | 8  | 99,088,251  | 105,884,484 | 3  | 3 | 6  | 0 |
| Case 105 | 8  | 105,884,605 | 118,827,839 | 4  | 3 | 7  | 0 |
| Case 105 | 8  | 118,828,761 | 129,716,308 | 3  | 3 | 6  | 0 |
| Case 105 | 8  | 129,725,425 | 132,054,152 | 4  | 3 | 7  | 0 |
| Case 105 | 8  | 132,058,522 | 133,033,089 | 4  | 4 | 8  | 0 |
| Case 105 | 8  | 133,034,922 | 135,766,277 | 4  | 3 | 7  | 0 |
| Case 105 | 8  | 135,768,759 | 135,809,634 | 5  | 5 | 10 | 0 |
| Case 105 | 8  | 135,812,548 | 146,174,266 | 4  | 3 | 7  | 0 |
| Case 105 | 8  | 146,192,754 | 146,293,414 | 4  | 4 | 8  | 0 |
| Case 105 | 9  | 46,587      | 19,942,824  | 2  | 1 | 3  | 0 |
| Case 105 | 9  | 19,946,627  | 32,381,910  | 3  | 1 | 4  | 0 |
| Case 105 | 9  | 32,382,071  | 46,944,322  | 2  | 1 | 3  | 0 |
| Case 105 | 9  | 65,629,772  | 78,751,683  | 2  | 1 | 3  | 0 |
| Case 105 | 9  | 78,752,764  | 78,792,438  | 3  | 2 | 5  | 0 |
| Case 105 | 9  | 78,793,274  | 89,845,133  | 2  | 1 | 3  | 0 |
| Case 105 | 9  | 89,849,237  | 89,922,395  | 3  | 2 | 5  | 0 |
| Case 105 | 9  | 89,922,889  | 141,066,491 | 2  | 1 | 3  | 0 |
| Case 105 | 10 | 98,087      | 12,662,552  | 4  | 0 | 4  | 1 |
| Case 105 | 10 | 12,669,049  | 13,330,449  | 5  | 0 | 5  | 1 |
| Case 105 | 10 | 13,330,457  | 37,812,532  | 4  | 0 | 4  | 1 |
| Case 105 | 10 | 37,815,014  | 39,097,912  | 3  | 0 | 3  | 1 |
| Case 105 | 10 | 42,436,301  | 54,744,574  | 3  | 0 | 3  | 1 |
| Case 105 | 10 | 54,745,248  | 59,420,427  | 2  | 0 | 2  | 1 |
| Case 105 | 10 | 59,420,647  | 117,713,221 | 3  | 0 | 3  | 1 |
| Case 105 | 10 | 117,720,208 | 133,954,011 | 4  | 0 | 4  | 1 |
| Case 105 | 10 | 133,954,831 | 135,477,883 | 3  | 0 | 3  | 1 |
| Case 105 | 11 | 193,146     | 3,208,101   | 1  | 1 | 2  | 0 |
| Case 105 | 11 | 3,208,798   | 51,385,894  | 2  | 1 | 3  | 0 |
| Case 105 | 11 | 51,391,183  | 51,591,253  | 3  | 1 | 4  | 0 |
| Case 105 | 11 | 54,794,237  | 66,249,741  | 3  | 1 | 4  | 0 |
| Case 105 | 11 | 66,249,898  | 74,033,066  | 4  | 1 | 5  | 0 |
| Case 105 | 11 | 74,035,535  | 74,201,436  | 5  | 1 | 6  | 0 |
| Case 105 | 11 | 74,202,033  | 82,514,969  | 4  | 1 | 5  | 0 |
| Case 105 | 11 | 82,520,338  | 84,049,216  | 6  | 1 | 7  | 0 |
| Case 105 | 11 | 84,053,382  | 86,002,055  | 5  | 1 | 6  | 0 |
| Case 105 | 11 | 86,006,280  | 87,345,252  | 6  | 1 | 7  | 0 |
| Case 105 | 11 | 87,345,390  | 87,447,212  | 4  | 1 | 5  | 0 |
| Case 105 | 11 | 87,447,966  | 88,931,636  | 7  | 1 | 8  | 0 |
| Case 105 | 11 | 88,933,250  | 89,182,275  | 9  | 0 | 9  | 1 |
| Case 105 | 11 | 89,182,609  | 89,405,190  | 13 | 1 | 14 | 0 |
| Case 105 | 11 | 89,413,795  | 134,934,063 | 3  | 1 | 4  | 0 |
| Case 105 | 12 | 191,619     | 10,344,387  | 3  | 0 | 3  | 1 |
| Case 105 | 12 | 10,347,179  | 34,853,011  | 4  | 0 | 4  | 1 |
| Case 105 | 12 | 37,876,400  | 55,047,126  | 4  | 0 | 4  | 1 |
| Case 105 | 12 | 55,048,199  | 55,381,991  | 5  | 0 | 5  | 1 |
| Case 105 | 12 | 55,384,308  | 58,023,981  | 4  | 0 | 4  | 1 |
| Case 105 | 12 | 58,024,278  | 61,080,573  | 3  | 0 | 3  | 1 |
| Case 105 | 12 | 61,090,072  | 108,874,663 | 4  | 0 | 4  | 1 |
| Case 105 | 12 | 108,874,961 | 115,558,139 | 3  | 0 | 3  | 1 |
| Case 105 | 12 | 115,559,122 | 116,325,118 | 4  | 0 | 4  | 1 |
| Case 105 | 12 | 116,326,264 | 125,646,451 | 3  | 0 | 3  | 1 |

|          |    |             |             |   |   |    |   |
|----------|----|-------------|-------------|---|---|----|---|
| Case 105 | 12 | 125,652,226 | 131,617,417 | 4 | 0 | 4  | 1 |
| Case 105 | 12 | 131,617,635 | 133,810,935 | 3 | 0 | 3  | 1 |
| Case 105 | 13 | 19,058,717  | 24,115,563  | 2 | 1 | 3  | 0 |
| Case 105 | 13 | 24,115,747  | 24,467,342  | 6 | 1 | 7  | 0 |
| Case 105 | 13 | 24,474,613  | 24,538,397  | 7 | 1 | 8  | 0 |
| Case 105 | 13 | 24,541,468  | 31,952,428  | 5 | 1 | 6  | 0 |
| Case 105 | 13 | 31,954,789  | 32,291,079  | 6 | 1 | 7  | 0 |
| Case 105 | 13 | 32,292,353  | 46,190,337  | 5 | 1 | 6  | 0 |
| Case 105 | 13 | 46,215,347  | 54,658,696  | 2 | 1 | 3  | 0 |
| Case 105 | 13 | 54,659,312  | 73,290,464  | 1 | 1 | 2  | 0 |
| Case 105 | 13 | 73,292,244  | 84,452,751  | 5 | 1 | 6  | 0 |
| Case 105 | 13 | 84,453,901  | 96,932,945  | 3 | 1 | 4  | 0 |
| Case 105 | 13 | 96,936,966  | 103,862,936 | 2 | 1 | 3  | 0 |
| Case 105 | 13 | 103,865,749 | 105,274,922 | 3 | 1 | 4  | 0 |
| Case 105 | 13 | 105,275,930 | 115,103,529 | 2 | 1 | 3  | 0 |
| Case 105 | 14 | 19,280,733  | 22,160,553  | 2 | 2 | 4  | 0 |
| Case 105 | 14 | 22,163,479  | 22,528,345  | 3 | 2 | 5  | 0 |
| Case 105 | 14 | 22,530,493  | 22,947,903  | 4 | 3 | 7  | 0 |
| Case 105 | 14 | 22,948,471  | 24,848,281  | 2 | 2 | 4  | 0 |
| Case 105 | 14 | 24,852,046  | 67,658,895  | 3 | 2 | 5  | 0 |
| Case 105 | 14 | 67,661,952  | 77,957,354  | 2 | 2 | 4  | 0 |
| Case 105 | 14 | 77,968,581  | 84,436,727  | 3 | 2 | 5  | 0 |
| Case 105 | 14 | 84,437,385  | 107,287,663 | 2 | 2 | 4  | 0 |
| Case 105 | 15 | 20,034,919  | 25,293,761  | 6 | 1 | 7  | 0 |
| Case 105 | 15 | 25,298,774  | 25,774,277  | 5 | 2 | 7  | 0 |
| Case 105 | 15 | 25,775,992  | 26,088,544  | 3 | 2 | 5  | 0 |
| Case 105 | 15 | 26,093,401  | 27,742,401  | 5 | 2 | 7  | 0 |
| Case 105 | 15 | 27,744,850  | 29,412,566  | 3 | 2 | 5  | 0 |
| Case 105 | 15 | 29,412,947  | 32,345,986  | 4 | 2 | 6  | 0 |
| Case 105 | 15 | 32,347,464  | 33,661,286  | 5 | 2 | 7  | 0 |
| Case 105 | 15 | 33,665,422  | 33,828,780  | 3 | 0 | 3  | 1 |
| Case 105 | 15 | 33,830,326  | 34,136,056  | 5 | 2 | 7  | 0 |
| Case 105 | 15 | 34,139,292  | 34,217,317  | 2 | 2 | 4  | 0 |
| Case 105 | 15 | 34,226,587  | 34,877,509  | 5 | 1 | 6  | 0 |
| Case 105 | 15 | 34,881,304  | 36,336,078  | 6 | 2 | 8  | 0 |
| Case 105 | 15 | 36,342,453  | 36,715,506  | 9 | 1 | 10 | 0 |
| Case 105 | 15 | 36,719,135  | 64,844,372  | 3 | 0 | 3  | 1 |
| Case 105 | 15 | 64,895,319  | 65,988,751  | 6 | 1 | 7  | 0 |
| Case 105 | 15 | 65,988,785  | 66,530,480  | 7 | 1 | 8  | 0 |
| Case 105 | 15 | 66,530,732  | 68,404,362  | 4 | 2 | 6  | 0 |
| Case 105 | 15 | 68,416,575  | 68,649,574  | 3 | 0 | 3  | 1 |
| Case 105 | 15 | 68,649,587  | 69,411,452  | 4 | 2 | 6  | 0 |
| Case 105 | 15 | 69,411,605  | 69,596,069  | 3 | 0 | 3  | 1 |
| Case 105 | 15 | 69,598,526  | 70,207,077  | 4 | 2 | 6  | 0 |
| Case 105 | 15 | 70,208,145  | 70,319,066  | 3 | 0 | 3  | 1 |
| Case 105 | 15 | 70,332,807  | 70,828,940  | 4 | 2 | 6  | 0 |
| Case 105 | 15 | 70,832,792  | 78,384,669  | 3 | 0 | 3  | 1 |
| Case 105 | 15 | 78,386,540  | 78,390,909  | 6 | 2 | 8  | 0 |
| Case 105 | 15 | 78,391,969  | 78,686,823  | 6 | 1 | 7  | 0 |
| Case 105 | 15 | 78,687,925  | 78,833,223  | 4 | 2 | 6  | 0 |
| Case 105 | 15 | 78,833,758  | 83,683,811  | 7 | 1 | 8  | 0 |
| Case 105 | 15 | 83,685,440  | 84,041,308  | 8 | 1 | 9  | 0 |
| Case 105 | 15 | 84,047,583  | 84,178,679  | 5 | 1 | 6  | 0 |
| Case 105 | 15 | 84,179,115  | 84,649,064  | 7 | 2 | 9  | 0 |
| Case 105 | 15 | 84,651,057  | 87,831,146  | 5 | 2 | 7  | 0 |
| Case 105 | 15 | 87,832,130  | 90,129,086  | 6 | 1 | 7  | 0 |
| Case 105 | 15 | 90,129,089  | 92,522,306  | 5 | 1 | 6  | 0 |
| Case 105 | 15 | 92,524,556  | 96,187,805  | 7 | 1 | 8  | 0 |
| Case 105 | 15 | 96,188,705  | 98,313,505  | 6 | 2 | 8  | 0 |
| Case 105 | 15 | 98,322,663  | 100,453,524 | 7 | 1 | 8  | 0 |
| Case 105 | 15 | 100,453,990 | 102,461,162 | 6 | 1 | 7  | 0 |

|          |    |            |             |   |   |   |   |
|----------|----|------------|-------------|---|---|---|---|
| Case 105 | 16 | 88,165     | 25,548,973  | 3 | 2 | 5 | 0 |
| Case 105 | 16 | 25,549,377 | 25,694,279  | 3 | 3 | 6 | 0 |
| Case 105 | 16 | 25,699,372 | 35,285,582  | 3 | 2 | 5 | 0 |
| Case 105 | 16 | 46,450,037 | 66,047,360  | 2 | 1 | 3 | 0 |
| Case 105 | 16 | 66,048,005 | 66,068,016  | 3 | 2 | 5 | 0 |
| Case 105 | 16 | 66,070,596 | 90,274,695  | 2 | 1 | 3 | 0 |
| Case 105 | 17 | 11,885     | 14,464,463  | 3 | 0 | 3 | 1 |
| Case 105 | 17 | 14,469,368 | 15,532,095  | 4 | 0 | 4 | 1 |
| Case 105 | 17 | 15,532,132 | 22,242,355  | 3 | 0 | 3 | 1 |
| Case 105 | 17 | 25,268,142 | 25,346,692  | 3 | 0 | 3 | 1 |
| Case 105 | 17 | 25,350,029 | 34,403,039  | 3 | 1 | 4 | 0 |
| Case 105 | 17 | 34,403,158 | 34,476,396  | 4 | 2 | 6 | 0 |
| Case 105 | 17 | 34,597,521 | 55,901,017  | 3 | 1 | 4 | 0 |
| Case 105 | 17 | 55,901,677 | 55,916,379  | 5 | 2 | 7 | 0 |
| Case 105 | 17 | 55,916,641 | 81,060,040  | 3 | 1 | 4 | 0 |
| Case 105 | 18 | 87,505     | 15,102,421  | 5 | 0 | 5 | 1 |
| Case 105 | 18 | 15,249,516 | 15,375,878  | 3 | 0 | 3 | 1 |
| Case 105 | 18 | 18,520,354 | 19,603,013  | 3 | 0 | 3 | 1 |
| Case 105 | 18 | 19,607,342 | 21,762,678  | 4 | 0 | 4 | 1 |
| Case 105 | 18 | 21,769,948 | 78,015,180  | 3 | 0 | 3 | 1 |
| Case 105 | 19 | 260,912    | 24,629,285  | 2 | 0 | 2 | 1 |
| Case 105 | 19 | 27,732,159 | 27,928,613  | 2 | 0 | 2 | 1 |
| Case 105 | 19 | 27,960,006 | 44,833,162  | 2 | 2 | 4 | 0 |
| Case 105 | 19 | 44,833,240 | 44,932,521  | 3 | 2 | 5 | 0 |
| Case 105 | 19 | 44,932,747 | 49,184,380  | 2 | 2 | 4 | 0 |
| Case 105 | 19 | 49,186,717 | 49,206,727  | 0 | 0 | 0 | 0 |
| Case 105 | 19 | 49,206,790 | 51,345,821  | 2 | 2 | 4 | 0 |
| Case 105 | 19 | 51,348,711 | 51,359,519  | 3 | 2 | 5 | 0 |
| Case 105 | 19 | 51,359,543 | 59,097,160  | 2 | 2 | 4 | 0 |
| Case 105 | 20 | 63,244     | 675,903     | 3 | 1 | 4 | 0 |
| Case 105 | 20 | 676,442    | 26,293,985  | 4 | 1 | 5 | 0 |
| Case 105 | 20 | 29,425,357 | 46,156,099  | 4 | 1 | 5 | 0 |
| Case 105 | 20 | 46,163,799 | 62,404,416  | 4 | 2 | 6 | 0 |
| Case 105 | 20 | 62,404,933 | 62,948,788  | 3 | 2 | 5 | 0 |
| Case 105 | 21 | 10,827,533 | 10,971,337  | 2 | 0 | 2 | 1 |
| Case 105 | 21 | 14,368,320 | 17,322,403  | 2 | 0 | 2 | 1 |
| Case 105 | 21 | 17,325,210 | 24,764,752  | 1 | 1 | 2 | 0 |
| Case 105 | 21 | 24,768,759 | 35,969,900  | 2 | 1 | 3 | 0 |
| Case 105 | 21 | 35,970,346 | 39,628,198  | 2 | 0 | 2 | 1 |
| Case 105 | 21 | 39,633,192 | 48,100,155  | 3 | 0 | 3 | 1 |
| Case 105 | 22 | 16,114,244 | 33,834,668  | 4 | 0 | 4 | 1 |
| Case 105 | 22 | 33,842,454 | 34,646,980  | 6 | 0 | 6 | 1 |
| Case 105 | 22 | 34,654,148 | 36,272,637  | 3 | 0 | 3 | 1 |
| Case 105 | 22 | 36,278,740 | 42,089,623  | 4 | 0 | 4 | 1 |
| Case 105 | 22 | 42,089,630 | 43,711,182  | 5 | 0 | 5 | 1 |
| Case 105 | 22 | 43,712,536 | 44,586,519  | 4 | 0 | 4 | 1 |
| Case 105 | 22 | 44,589,008 | 49,977,557  | 3 | 0 | 3 | 1 |
| Case 105 | 22 | 49,978,215 | 51,195,728  | 2 | 0 | 2 | 1 |
| Case 105 | X  | 2,700,157  | 58,488,110  | 1 | 1 | 2 | 0 |
| Case 105 | X  | 61,694,576 | 154,898,561 | 1 | 1 | 2 | 0 |
| Case 106 | 1  | 82,154     | 5,114,102   | 1 | 1 | 2 | 0 |
| Case 106 | 1  | 5,124,859  | 5,790,655   | 1 | 0 | 1 | 0 |
| Case 106 | 1  | 5,793,755  | 8,009,763   | 1 | 1 | 2 | 0 |
| Case 106 | 1  | 8,015,436  | 9,741,792   | 1 | 0 | 1 | 0 |
| Case 106 | 1  | 9,746,248  | 11,159,851  | 1 | 1 | 2 | 0 |
| Case 106 | 1  | 11,166,713 | 11,788,564  | 1 | 0 | 1 | 0 |
| Case 106 | 1  | 11,794,553 | 11,971,749  | 2 | 0 | 2 | 1 |
| Case 106 | 1  | 11,973,888 | 19,528,847  | 1 | 0 | 1 | 0 |
| Case 106 | 1  | 19,531,534 | 25,768,937  | 1 | 1 | 2 | 0 |
| Case 106 | 1  | 25,775,733 | 28,220,484  | 1 | 0 | 1 | 0 |
| Case 106 | 1  | 28,223,519 | 28,882,973  | 1 | 1 | 2 | 0 |

|          |   |             |             |   |   |   |   |
|----------|---|-------------|-------------|---|---|---|---|
| Case 106 | 1 | 28,888,101  | 29,616,224  | 1 | 0 | 1 | 0 |
| Case 106 | 1 | 29,616,318  | 41,702,942  | 1 | 1 | 2 | 0 |
| Case 106 | 1 | 41,744,807  | 41,830,257  | 1 | 0 | 1 | 0 |
| Case 106 | 1 | 41,831,047  | 42,444,975  | 2 | 0 | 2 | 1 |
| Case 106 | 1 | 42,445,113  | 43,696,080  | 1 | 1 | 2 | 0 |
| Case 106 | 1 | 43,697,968  | 44,319,373  | 1 | 0 | 1 | 0 |
| Case 106 | 1 | 44,345,292  | 50,023,956  | 1 | 1 | 2 | 0 |
| Case 106 | 1 | 50,046,741  | 53,153,451  | 2 | 1 | 3 | 0 |
| Case 106 | 1 | 53,155,867  | 53,996,718  | 1 | 1 | 2 | 0 |
| Case 106 | 1 | 53,999,509  | 54,120,873  | 2 | 1 | 3 | 0 |
| Case 106 | 1 | 54,121,818  | 121,346,616 | 1 | 1 | 2 | 0 |
| Case 106 | 1 | 142,649,718 | 166,362,651 | 1 | 1 | 2 | 0 |
| Case 106 | 1 | 166,364,063 | 166,860,471 | 2 | 1 | 3 | 0 |
| Case 106 | 1 | 166,882,737 | 174,552,811 | 1 | 1 | 2 | 0 |
| Case 106 | 1 | 174,592,050 | 181,358,407 | 1 | 0 | 1 | 0 |
| Case 106 | 1 | 181,359,880 | 187,196,272 | 1 | 1 | 2 | 0 |
| Case 106 | 1 | 187,208,014 | 224,838,018 | 2 | 1 | 3 | 0 |
| Case 106 | 1 | 224,842,251 | 224,872,473 | 3 | 1 | 4 | 0 |
| Case 106 | 1 | 224,874,931 | 239,498,465 | 2 | 1 | 3 | 0 |
| Case 106 | 1 | 239,498,915 | 239,971,919 | 1 | 1 | 2 | 0 |
| Case 106 | 1 | 239,972,021 | 249,218,992 | 2 | 1 | 3 | 0 |
| Case 106 | 2 | 18,674      | 1,271,230   | 1 | 0 | 1 | 0 |
| Case 106 | 2 | 1,271,281   | 45,187,127  | 2 | 0 | 2 | 1 |
| Case 106 | 2 | 45,189,763  | 45,311,319  | 3 | 0 | 3 | 1 |
| Case 106 | 2 | 45,312,196  | 92,081,640  | 2 | 0 | 2 | 1 |
| Case 106 | 2 | 95,429,424  | 236,617,424 | 2 | 0 | 2 | 1 |
| Case 106 | 2 | 236,617,595 | 240,871,018 | 1 | 0 | 1 | 0 |
| Case 106 | 2 | 240,871,893 | 242,293,209 | 2 | 0 | 2 | 1 |
| Case 106 | 2 | 242,294,396 | 243,048,760 | 1 | 0 | 1 | 0 |
| Case 106 | 3 | 61,495      | 195,315     | 3 | 0 | 3 | 1 |
| Case 106 | 3 | 195,923     | 30,134,493  | 2 | 0 | 2 | 1 |
| Case 106 | 3 | 30,136,362  | 31,551,780  | 3 | 0 | 3 | 1 |
| Case 106 | 3 | 31,554,627  | 60,310,790  | 2 | 0 | 2 | 1 |
| Case 106 | 3 | 60,315,708  | 60,594,367  | 0 | 0 | 0 | 0 |
| Case 106 | 3 | 60,595,403  | 75,012,674  | 2 | 0 | 2 | 1 |
| Case 106 | 3 | 75,051,562  | 90,442,925  | 0 | 0 | 0 | 0 |
| Case 106 | 3 | 93,537,290  | 93,537,290  | 0 | 0 | 0 | 0 |
| Case 106 | 3 | 93,545,404  | 94,766,856  | 2 | 0 | 2 | 1 |
| Case 106 | 3 | 94,772,205  | 95,851,156  | 0 | 0 | 0 | 0 |
| Case 106 | 3 | 95,861,229  | 107,945,078 | 2 | 0 | 2 | 1 |
| Case 106 | 3 | 107,961,441 | 108,072,524 | 3 | 0 | 3 | 1 |
| Case 106 | 3 | 108,072,704 | 110,794,998 | 2 | 0 | 2 | 1 |
| Case 106 | 3 | 110,797,337 | 112,269,287 | 1 | 0 | 1 | 0 |
| Case 106 | 3 | 112,282,323 | 177,229,309 | 2 | 0 | 2 | 1 |
| Case 106 | 3 | 177,231,614 | 177,744,450 | 3 | 0 | 3 | 1 |
| Case 106 | 3 | 177,744,507 | 193,426,056 | 2 | 0 | 2 | 1 |
| Case 106 | 3 | 193,427,781 | 193,682,140 | 3 | 0 | 3 | 1 |
| Case 106 | 3 | 193,693,543 | 197,838,262 | 2 | 0 | 2 | 1 |
| Case 106 | 4 | 71,566      | 49,109,992  | 1 | 0 | 1 | 0 |
| Case 106 | 4 | 49,513,783  | 49,620,898  | 2 | 0 | 2 | 1 |
| Case 106 | 4 | 52,697,856  | 74,373,060  | 2 | 0 | 2 | 1 |
| Case 106 | 4 | 74,402,790  | 76,191,643  | 3 | 0 | 3 | 1 |
| Case 106 | 4 | 76,192,871  | 141,205,306 | 2 | 0 | 2 | 1 |
| Case 106 | 4 | 141,208,028 | 148,277,011 | 1 | 0 | 1 | 0 |
| Case 106 | 4 | 148,280,874 | 151,349,664 | 2 | 0 | 2 | 1 |
| Case 106 | 4 | 151,356,081 | 155,129,517 | 1 | 0 | 1 | 0 |
| Case 106 | 4 | 155,132,707 | 164,230,540 | 2 | 0 | 2 | 1 |
| Case 106 | 4 | 164,242,092 | 164,340,073 | 3 | 0 | 3 | 1 |
| Case 106 | 4 | 164,350,705 | 177,974,062 | 2 | 0 | 2 | 1 |
| Case 106 | 4 | 177,974,857 | 177,999,318 | 3 | 0 | 3 | 1 |
| Case 106 | 4 | 178,001,276 | 190,963,766 | 2 | 0 | 2 | 1 |

|          |    |             |             |   |   |   |   |
|----------|----|-------------|-------------|---|---|---|---|
| Case 106 | 5  | 38,139      | 46,138,457  | 3 | 0 | 3 | 1 |
| Case 106 | 5  | 46,162,561  | 46,399,093  | 2 | 0 | 2 | 1 |
| Case 106 | 5  | 49,457,282  | 55,595,142  | 2 | 0 | 2 | 1 |
| Case 106 | 5  | 55,595,606  | 55,834,230  | 3 | 0 | 3 | 1 |
| Case 106 | 5  | 55,841,462  | 57,765,914  | 2 | 0 | 2 | 1 |
| Case 106 | 5  | 57,773,368  | 57,787,376  | 3 | 0 | 3 | 1 |
| Case 106 | 5  | 57,790,337  | 65,008,798  | 2 | 0 | 2 | 1 |
| Case 106 | 5  | 65,010,764  | 91,390,316  | 1 | 0 | 1 | 0 |
| Case 106 | 5  | 91,395,086  | 180,693,127 | 2 | 0 | 2 | 1 |
| Case 106 | 6  | 108,666     | 43,618,147  | 2 | 0 | 2 | 1 |
| Case 106 | 6  | 43,618,257  | 57,398,318  | 1 | 1 | 2 | 0 |
| Case 106 | 6  | 57,412,942  | 58,752,089  | 2 | 1 | 3 | 0 |
| Case 106 | 6  | 61,891,118  | 75,238,840  | 2 | 1 | 3 | 0 |
| Case 106 | 6  | 75,264,996  | 84,020,324  | 1 | 1 | 2 | 0 |
| Case 106 | 6  | 84,020,505  | 148,730,018 | 2 | 1 | 3 | 0 |
| Case 106 | 6  | 148,731,834 | 148,785,054 | 1 | 0 | 1 | 0 |
| Case 106 | 6  | 148,785,423 | 162,617,643 | 2 | 1 | 3 | 0 |
| Case 106 | 6  | 162,619,277 | 162,828,829 | 2 | 0 | 2 | 1 |
| Case 106 | 6  | 162,831,336 | 162,993,672 | 1 | 0 | 1 | 0 |
| Case 106 | 6  | 162,994,422 | 163,273,193 | 1 | 1 | 2 | 0 |
| Case 106 | 6  | 163,273,326 | 170,980,171 | 2 | 1 | 3 | 0 |
| Case 106 | 7  | 44,935      | 58,019,061  | 2 | 1 | 3 | 0 |
| Case 106 | 7  | 61,056,053  | 61,852,895  | 2 | 1 | 3 | 0 |
| Case 106 | 7  | 61,994,170  | 62,577,770  | 1 | 1 | 2 | 0 |
| Case 106 | 7  | 62,627,173  | 110,511,679 | 2 | 1 | 3 | 0 |
| Case 106 | 7  | 110,514,428 | 111,080,241 | 1 | 0 | 1 | 0 |
| Case 106 | 7  | 111,092,478 | 122,376,318 | 2 | 1 | 3 | 0 |
| Case 106 | 7  | 122,392,897 | 122,525,329 | 1 | 1 | 2 | 0 |
| Case 106 | 7  | 122,534,888 | 146,639,472 | 2 | 1 | 3 | 0 |
| Case 106 | 7  | 146,642,350 | 147,292,345 | 2 | 0 | 2 | 1 |
| Case 106 | 7  | 147,292,995 | 157,414,146 | 2 | 1 | 3 | 0 |
| Case 106 | 7  | 157,415,516 | 157,713,213 | 2 | 0 | 2 | 1 |
| Case 106 | 7  | 157,714,638 | 159,119,486 | 2 | 1 | 3 | 0 |
| Case 106 | 8  | 164,984     | 3,687,917   | 2 | 1 | 3 | 0 |
| Case 106 | 8  | 3,694,644   | 11,501,447  | 3 | 1 | 4 | 0 |
| Case 106 | 8  | 11,502,515  | 11,850,495  | 2 | 2 | 4 | 0 |
| Case 106 | 8  | 11,851,156  | 12,181,277  | 3 | 1 | 4 | 0 |
| Case 106 | 8  | 12,483,094  | 43,570,196  | 3 | 0 | 3 | 1 |
| Case 106 | 8  | 43,570,228  | 43,791,691  | 2 | 0 | 2 | 1 |
| Case 106 | 8  | 46,886,735  | 47,281,693  | 2 | 0 | 2 | 1 |
| Case 106 | 8  | 47,290,423  | 144,477,853 | 3 | 0 | 3 | 1 |
| Case 106 | 8  | 144,482,856 | 144,514,383 | 4 | 0 | 4 | 1 |
| Case 106 | 8  | 144,518,049 | 146,293,414 | 3 | 0 | 3 | 1 |
| Case 106 | 9  | 46,587      | 10,411,393  | 1 | 1 | 2 | 0 |
| Case 106 | 9  | 10,421,687  | 10,936,135  | 1 | 0 | 1 | 0 |
| Case 106 | 9  | 10,936,687  | 46,944,322  | 1 | 1 | 2 | 0 |
| Case 106 | 9  | 65,629,772  | 112,438,399 | 1 | 1 | 2 | 0 |
| Case 106 | 9  | 112,440,123 | 122,463,062 | 2 | 1 | 3 | 0 |
| Case 106 | 9  | 122,473,586 | 126,116,865 | 3 | 1 | 4 | 0 |
| Case 106 | 9  | 126,117,558 | 135,562,800 | 2 | 1 | 3 | 0 |
| Case 106 | 9  | 135,568,632 | 141,066,491 | 3 | 1 | 4 | 0 |
| Case 106 | 10 | 98,087      | 39,097,912  | 2 | 1 | 3 | 0 |
| Case 106 | 10 | 42,436,301  | 135,477,883 | 2 | 1 | 3 | 0 |
| Case 106 | 11 | 193,146     | 2,610,027   | 2 | 1 | 3 | 0 |
| Case 106 | 11 | 2,610,079   | 2,640,824   | 2 | 2 | 4 | 0 |
| Case 106 | 11 | 2,641,129   | 12,353,977  | 2 | 1 | 3 | 0 |
| Case 106 | 11 | 12,362,700  | 15,941,099  | 2 | 2 | 4 | 0 |
| Case 106 | 11 | 15,942,032  | 20,429,496  | 2 | 1 | 3 | 0 |
| Case 106 | 11 | 20,429,574  | 42,767,185  | 2 | 2 | 4 | 0 |
| Case 106 | 11 | 42,767,612  | 49,214,394  | 2 | 1 | 3 | 0 |
| Case 106 | 11 | 49,221,914  | 50,332,064  | 2 | 2 | 4 | 0 |



|          |    |             |             |   |   |   |   |
|----------|----|-------------|-------------|---|---|---|---|
| Case 106 | 11 | 50,345,390  | 51,591,253  | 2 | 1 | 3 | 0 |
| Case 106 | 11 | 54,794,237  | 95,532,445  | 2 | 1 | 3 | 0 |
| Case 106 | 11 | 95,546,226  | 95,697,220  | 3 | 1 | 4 | 0 |
| Case 106 | 11 | 95,698,325  | 97,054,703  | 2 | 1 | 3 | 0 |
| Case 106 | 11 | 97,056,281  | 97,435,372  | 3 | 1 | 4 | 0 |
| Case 106 | 11 | 97,439,081  | 120,833,316 | 2 | 1 | 3 | 0 |
| Case 106 | 11 | 120,834,573 | 131,950,721 | 3 | 1 | 4 | 0 |
| Case 106 | 11 | 131,951,199 | 132,492,326 | 2 | 1 | 3 | 0 |
| Case 106 | 11 | 132,492,426 | 134,934,063 | 3 | 1 | 4 | 0 |
| Case 106 | 12 | 191,619     | 34,853,011  | 1 | 1 | 2 | 0 |
| Case 106 | 12 | 37,876,400  | 40,182,606  | 1 | 1 | 2 | 0 |
| Case 106 | 12 | 40,192,820  | 40,328,757  | 1 | 0 | 1 | 0 |
| Case 106 | 12 | 40,340,849  | 133,810,935 | 1 | 1 | 2 | 0 |
| Case 106 | 13 | 19,058,717  | 41,838,433  | 2 | 0 | 2 | 1 |
| Case 106 | 13 | 41,842,546  | 44,482,204  | 1 | 1 | 2 | 0 |
| Case 106 | 13 | 44,493,527  | 45,548,000  | 1 | 0 | 1 | 0 |
| Case 106 | 13 | 45,555,062  | 49,284,125  | 1 | 1 | 2 | 0 |
| Case 106 | 13 | 49,294,626  | 49,312,810  | 2 | 1 | 3 | 0 |
| Case 106 | 13 | 49,313,075  | 73,343,046  | 1 | 1 | 2 | 0 |
| Case 106 | 13 | 73,345,274  | 74,288,499  | 1 | 0 | 1 | 0 |
| Case 106 | 13 | 74,289,627  | 114,835,802 | 1 | 1 | 2 | 0 |
| Case 106 | 13 | 114,841,826 | 115,103,529 | 2 | 1 | 3 | 0 |
| Case 106 | 14 | 19,280,733  | 22,425,847  | 1 | 0 | 1 | 0 |
| Case 106 | 14 | 22,427,444  | 22,978,760  | 2 | 0 | 2 | 1 |
| Case 106 | 14 | 22,978,775  | 34,570,966  | 1 | 0 | 1 | 0 |
| Case 106 | 14 | 34,574,483  | 34,787,987  | 3 | 0 | 3 | 1 |
| Case 106 | 14 | 34,790,349  | 56,960,032  | 2 | 0 | 2 | 1 |
| Case 106 | 14 | 56,963,072  | 57,013,726  | 3 | 0 | 3 | 1 |
| Case 106 | 14 | 57,014,205  | 107,287,663 | 2 | 0 | 2 | 1 |
| Case 106 | 15 | 20,034,919  | 32,303,657  | 2 | 1 | 3 | 0 |
| Case 106 | 15 | 32,309,184  | 44,609,796  | 2 | 0 | 2 | 1 |
| Case 106 | 15 | 44,613,689  | 48,127,428  | 2 | 1 | 3 | 0 |
| Case 106 | 15 | 48,128,896  | 49,093,824  | 2 | 0 | 2 | 1 |
| Case 106 | 15 | 49,097,786  | 54,224,610  | 2 | 2 | 4 | 0 |
| Case 106 | 15 | 54,226,685  | 87,857,559  | 2 | 0 | 2 | 1 |
| Case 106 | 15 | 87,861,101  | 94,048,638  | 2 | 1 | 3 | 0 |
| Case 106 | 15 | 94,059,384  | 98,894,170  | 2 | 2 | 4 | 0 |
| Case 106 | 15 | 98,895,251  | 102,461,162 | 2 | 1 | 3 | 0 |
| Case 106 | 16 | 88,165      | 35,285,582  | 1 | 1 | 2 | 0 |
| Case 106 | 16 | 46,450,037  | 68,566,787  | 1 | 1 | 2 | 0 |
| Case 106 | 16 | 68,573,287  | 78,725,014  | 1 | 0 | 1 | 0 |
| Case 106 | 16 | 78,729,624  | 78,869,317  | 0 | 0 | 0 | 0 |
| Case 106 | 16 | 78,869,545  | 84,311,563  | 1 | 0 | 1 | 0 |
| Case 106 | 16 | 84,311,702  | 90,274,695  | 1 | 1 | 2 | 0 |
| Case 106 | 17 | 11,885      | 1,501,852   | 1 | 0 | 1 | 0 |
| Case 106 | 17 | 1,504,576   | 1,748,028   | 2 | 0 | 2 | 1 |
| Case 106 | 17 | 1,756,351   | 3,608,522   | 3 | 0 | 3 | 1 |
| Case 106 | 17 | 3,612,762   | 21,528,062  | 2 | 0 | 2 | 1 |
| Case 106 | 17 | 21,539,613  | 22,242,355  | 2 | 1 | 3 | 0 |
| Case 106 | 17 | 25,268,142  | 50,289,447  | 2 | 1 | 3 | 0 |
| Case 106 | 17 | 50,294,106  | 70,421,289  | 2 | 0 | 2 | 1 |
| Case 106 | 17 | 70,425,818  | 70,441,787  | 3 | 0 | 3 | 1 |
| Case 106 | 17 | 70,445,988  | 81,060,040  | 2 | 0 | 2 | 1 |
| Case 106 | 18 | 87,505      | 15,375,878  | 2 | 0 | 2 | 1 |
| Case 106 | 18 | 18,520,354  | 46,385,959  | 2 | 0 | 2 | 1 |
| Case 106 | 18 | 46,388,444  | 54,796,034  | 1 | 0 | 1 | 0 |
| Case 106 | 18 | 54,797,109  | 54,950,575  | 2 | 0 | 2 | 1 |
| Case 106 | 18 | 54,953,136  | 66,309,421  | 1 | 0 | 1 | 0 |
| Case 106 | 18 | 66,309,996  | 78,015,180  | 2 | 0 | 2 | 1 |
| Case 106 | 19 | 260,912     | 6,658,613   | 2 | 1 | 3 | 0 |
| Case 106 | 19 | 6,658,636   | 24,629,285  | 1 | 1 | 2 | 0 |

|          |    |             |             |   |   |   |   |
|----------|----|-------------|-------------|---|---|---|---|
| Case 106 | 19 | 27,732,159  | 59,097,160  | 1 | 1 | 2 | 0 |
| Case 106 | 20 | 63,244      | 14,665,545  | 2 | 1 | 3 | 0 |
| Case 106 | 20 | 14,665,605  | 14,747,025  | 3 | 0 | 3 | 1 |
| Case 106 | 20 | 14,747,471  | 15,122,254  | 0 | 0 | 0 | 0 |
| Case 106 | 20 | 15,127,194  | 26,293,985  | 2 | 1 | 3 | 0 |
| Case 106 | 20 | 29,425,357  | 62,948,788  | 2 | 1 | 3 | 0 |
| Case 106 | 21 | 10,827,533  | 10,971,337  | 1 | 1 | 2 | 0 |
| Case 106 | 21 | 14,368,320  | 31,340,248  | 1 | 1 | 2 | 0 |
| Case 106 | 21 | 31,350,669  | 34,486,690  | 1 | 0 | 1 | 0 |
| Case 106 | 21 | 34,493,297  | 36,816,352  | 1 | 1 | 2 | 0 |
| Case 106 | 21 | 36,819,003  | 37,935,669  | 1 | 0 | 1 | 0 |
| Case 106 | 21 | 37,938,729  | 38,184,059  | 2 | 0 | 2 | 1 |
| Case 106 | 21 | 38,185,881  | 39,182,197  | 1 | 1 | 2 | 0 |
| Case 106 | 21 | 39,183,533  | 45,696,025  | 1 | 0 | 1 | 0 |
| Case 106 | 21 | 45,699,320  | 47,717,537  | 1 | 1 | 2 | 0 |
| Case 106 | 21 | 47,717,686  | 48,100,155  | 2 | 1 | 3 | 0 |
| Case 106 | 22 | 16,114,244  | 18,650,746  | 1 | 1 | 2 | 0 |
| Case 106 | 22 | 18,650,803  | 21,025,732  | 2 | 1 | 3 | 0 |
| Case 106 | 22 | 21,062,168  | 23,438,273  | 1 | 1 | 2 | 0 |
| Case 106 | 22 | 23,443,909  | 25,658,525  | 2 | 1 | 3 | 0 |
| Case 106 | 22 | 25,661,725  | 34,186,914  | 1 | 1 | 2 | 0 |
| Case 106 | 22 | 34,194,745  | 34,273,307  | 1 | 0 | 1 | 0 |
| Case 106 | 22 | 34,274,556  | 36,942,323  | 1 | 1 | 2 | 0 |
| Case 106 | 22 | 36,943,544  | 49,304,823  | 2 | 1 | 3 | 0 |
| Case 106 | 22 | 49,305,099  | 51,123,505  | 3 | 1 | 4 | 0 |
| Case 106 | 22 | 51,133,580  | 51,195,728  | 2 | 0 | 2 | 1 |
| Case 106 | X  | 2,700,157   | 58,488,110  | 2 | 0 | 2 | 1 |
| Case 106 | X  | 61,694,576  | 154,898,561 | 2 | 0 | 2 | 1 |
| Case 107 | 1  | 82,154      | 7,760,733   | 3 | 2 | 5 | 0 |
| Case 107 | 1  | 7,774,071   | 121,346,616 | 2 | 2 | 4 | 0 |
| Case 107 | 1  | 142,649,718 | 152,595,565 | 2 | 2 | 4 | 0 |
| Case 107 | 1  | 152,596,414 | 153,410,682 | 3 | 2 | 5 | 0 |
| Case 107 | 1  | 153,410,751 | 156,765,973 | 2 | 2 | 4 | 0 |
| Case 107 | 1  | 156,767,253 | 157,891,524 | 3 | 2 | 5 | 0 |
| Case 107 | 1  | 157,891,565 | 162,798,636 | 2 | 2 | 4 | 0 |
| Case 107 | 1  | 162,800,207 | 163,483,089 | 3 | 2 | 5 | 0 |
| Case 107 | 1  | 163,487,264 | 249,218,992 | 2 | 2 | 4 | 0 |
| Case 107 | 2  | 18,674      | 10,194,192  | 2 | 2 | 4 | 0 |
| Case 107 | 2  | 10,194,487  | 10,206,686  | 3 | 3 | 6 | 0 |
| Case 107 | 2  | 10,209,993  | 92,081,640  | 2 | 2 | 4 | 0 |
| Case 107 | 2  | 95,429,424  | 243,048,760 | 2 | 2 | 4 | 0 |
| Case 107 | 3  | 61,495      | 86,558,884  | 2 | 2 | 4 | 0 |
| Case 107 | 3  | 86,571,808  | 90,442,925  | 3 | 2 | 5 | 0 |
| Case 107 | 3  | 93,537,290  | 161,003,124 | 3 | 2 | 5 | 0 |
| Case 107 | 3  | 161,008,125 | 161,195,729 | 3 | 3 | 6 | 0 |
| Case 107 | 3  | 161,203,534 | 175,059,171 | 3 | 2 | 5 | 0 |
| Case 107 | 3  | 175,061,871 | 175,647,165 | 2 | 2 | 4 | 0 |
| Case 107 | 3  | 175,651,713 | 194,792,324 | 3 | 2 | 5 | 0 |
| Case 107 | 3  | 194,792,415 | 197,838,262 | 2 | 2 | 4 | 0 |
| Case 107 | 4  | 71,566      | 49,620,898  | 2 | 2 | 4 | 0 |
| Case 107 | 4  | 52,697,856  | 178,112,004 | 2 | 2 | 4 | 0 |
| Case 107 | 4  | 178,116,819 | 180,186,551 | 3 | 2 | 5 | 0 |
| Case 107 | 4  | 180,187,024 | 190,963,766 | 2 | 2 | 4 | 0 |
| Case 107 | 5  | 38,139      | 1,656,054   | 3 | 2 | 5 | 0 |
| Case 107 | 5  | 1,659,414   | 46,399,093  | 2 | 2 | 4 | 0 |
| Case 107 | 5  | 49,457,282  | 114,405,806 | 2 | 2 | 4 | 0 |
| Case 107 | 5  | 114,407,438 | 131,686,146 | 3 | 2 | 5 | 0 |
| Case 107 | 5  | 131,699,867 | 166,424,076 | 2 | 2 | 4 | 0 |
| Case 107 | 5  | 166,426,291 | 180,693,127 | 3 | 2 | 5 | 0 |
| Case 107 | 6  | 108,666     | 2,900,695   | 2 | 2 | 4 | 0 |
| Case 107 | 6  | 2,901,671   | 3,780,451   | 3 | 2 | 5 | 0 |

|          |    |             |             |   |   |   |   |
|----------|----|-------------|-------------|---|---|---|---|
| Case 107 | 6  | 3,781,719   | 19,945,505  | 2 | 2 | 4 | 0 |
| Case 107 | 6  | 19,946,730  | 20,366,062  | 3 | 2 | 5 | 0 |
| Case 107 | 6  | 20,366,580  | 32,704,523  | 2 | 2 | 4 | 0 |
| Case 107 | 6  | 32,704,884  | 32,936,373  | 3 | 2 | 5 | 0 |
| Case 107 | 6  | 32,937,901  | 37,934,269  | 2 | 2 | 4 | 0 |
| Case 107 | 6  | 37,949,615  | 38,505,602  | 4 | 3 | 7 | 0 |
| Case 107 | 6  | 38,508,509  | 41,619,247  | 2 | 2 | 4 | 0 |
| Case 107 | 6  | 41,619,363  | 41,665,506  | 3 | 2 | 5 | 0 |
| Case 107 | 6  | 41,670,633  | 43,065,913  | 5 | 1 | 6 | 0 |
| Case 107 | 6  | 43,068,370  | 43,114,702  | 7 | 1 | 8 | 0 |
| Case 107 | 6  | 43,115,670  | 43,811,762  | 5 | 1 | 6 | 0 |
| Case 107 | 6  | 43,815,364  | 44,291,641  | 3 | 2 | 5 | 0 |
| Case 107 | 6  | 44,297,772  | 46,588,049  | 2 | 2 | 4 | 0 |
| Case 107 | 6  | 46,588,362  | 46,592,418  | 3 | 2 | 5 | 0 |
| Case 107 | 6  | 46,592,879  | 58,752,089  | 2 | 2 | 4 | 0 |
| Case 107 | 6  | 61,891,118  | 134,740,760 | 2 | 2 | 4 | 0 |
| Case 107 | 6  | 134,744,184 | 147,723,577 | 3 | 2 | 5 | 0 |
| Case 107 | 6  | 147,730,324 | 148,108,890 | 2 | 2 | 4 | 0 |
| Case 107 | 6  | 148,126,416 | 170,980,171 | 3 | 2 | 5 | 0 |
| Case 107 | 7  | 44,935      | 55,301,151  | 2 | 2 | 4 | 0 |
| Case 107 | 7  | 55,301,435  | 55,323,098  | 3 | 2 | 5 | 0 |
| Case 107 | 7  | 55,326,587  | 58,019,061  | 2 | 2 | 4 | 0 |
| Case 107 | 7  | 61,056,053  | 90,851,322  | 2 | 2 | 4 | 0 |
| Case 107 | 7  | 90,852,632  | 100,309,544 | 3 | 2 | 5 | 0 |
| Case 107 | 7  | 100,313,768 | 118,225,898 | 2 | 2 | 4 | 0 |
| Case 107 | 7  | 118,228,470 | 121,947,456 | 3 | 2 | 5 | 0 |
| Case 107 | 7  | 121,949,318 | 159,119,486 | 2 | 2 | 4 | 0 |
| Case 107 | 8  | 164,984     | 32,954,243  | 2 | 2 | 4 | 0 |
| Case 107 | 8  | 32,959,945  | 43,791,691  | 3 | 2 | 5 | 0 |
| Case 107 | 8  | 46,886,735  | 141,461,103 | 3 | 2 | 5 | 0 |
| Case 107 | 8  | 141,461,210 | 142,446,934 | 2 | 2 | 4 | 0 |
| Case 107 | 8  | 142,446,937 | 146,293,414 | 3 | 2 | 5 | 0 |
| Case 107 | 9  | 46,587      | 25,594,961  | 2 | 2 | 4 | 0 |
| Case 107 | 9  | 25,598,014  | 25,950,814  | 3 | 2 | 5 | 0 |
| Case 107 | 9  | 25,953,815  | 26,273,887  | 2 | 2 | 4 | 0 |
| Case 107 | 9  | 26,275,374  | 46,944,322  | 3 | 2 | 5 | 0 |
| Case 107 | 9  | 65,629,772  | 135,850,574 | 2 | 2 | 4 | 0 |
| Case 107 | 9  | 135,852,953 | 139,483,954 | 3 | 2 | 5 | 0 |
| Case 107 | 9  | 139,487,092 | 139,518,718 | 3 | 3 | 6 | 0 |
| Case 107 | 9  | 139,518,965 | 141,066,491 | 3 | 2 | 5 | 0 |
| Case 107 | 10 | 98,087      | 858,924     | 2 | 2 | 4 | 0 |
| Case 107 | 10 | 859,047     | 37,213,409  | 3 | 2 | 5 | 0 |
| Case 107 | 10 | 37,214,419  | 39,097,912  | 2 | 2 | 4 | 0 |
| Case 107 | 10 | 42,436,301  | 43,372,261  | 2 | 2 | 4 | 0 |
| Case 107 | 10 | 43,373,200  | 78,589,532  | 3 | 2 | 5 | 0 |
| Case 107 | 10 | 78,593,852  | 82,382,553  | 4 | 2 | 6 | 0 |
| Case 107 | 10 | 82,385,041  | 83,060,356  | 3 | 2 | 5 | 0 |
| Case 107 | 10 | 83,070,163  | 134,821,422 | 2 | 2 | 4 | 0 |
| Case 107 | 10 | 134,832,782 | 135,477,883 | 3 | 2 | 5 | 0 |
| Case 107 | 11 | 193,146     | 2,059,195   | 3 | 2 | 5 | 0 |
| Case 107 | 11 | 2,066,031   | 2,090,456   | 2 | 2 | 4 | 0 |
| Case 107 | 11 | 2,095,733   | 47,611,675  | 3 | 2 | 5 | 0 |
| Case 107 | 11 | 47,611,720  | 51,591,253  | 2 | 2 | 4 | 0 |
| Case 107 | 11 | 54,794,237  | 55,432,851  | 2 | 2 | 4 | 0 |
| Case 107 | 11 | 55,432,865  | 104,899,901 | 3 | 2 | 5 | 0 |
| Case 107 | 11 | 104,900,393 | 105,239,441 | 2 | 2 | 4 | 0 |
| Case 107 | 11 | 105,251,489 | 134,934,063 | 3 | 2 | 5 | 0 |
| Case 107 | 12 | 191,619     | 335,631     | 3 | 2 | 5 | 0 |
| Case 107 | 12 | 335,922     | 24,512,352  | 2 | 2 | 4 | 0 |
| Case 107 | 12 | 24,512,551  | 31,799,091  | 3 | 2 | 5 | 0 |
| Case 107 | 12 | 31,803,861  | 34,853,011  | 2 | 2 | 4 | 0 |

|          |    |             |             |   |   |   |   |
|----------|----|-------------|-------------|---|---|---|---|
| Case 107 | 12 | 37,876,400  | 43,014,321  | 2 | 2 | 4 | 0 |
| Case 107 | 12 | 43,017,525  | 43,321,984  | 3 | 2 | 5 | 0 |
| Case 107 | 12 | 43,324,202  | 52,402,998  | 2 | 2 | 4 | 0 |
| Case 107 | 12 | 52,403,110  | 52,649,269  | 3 | 2 | 5 | 0 |
| Case 107 | 12 | 52,649,887  | 56,536,872  | 2 | 2 | 4 | 0 |
| Case 107 | 12 | 56,546,011  | 133,810,935 | 3 | 2 | 5 | 0 |
| Case 107 | 13 | 19,058,717  | 115,103,529 | 3 | 2 | 5 | 0 |
| Case 107 | 14 | 19,280,733  | 107,287,663 | 2 | 2 | 4 | 0 |
| Case 107 | 15 | 20,034,919  | 102,461,162 | 2 | 2 | 4 | 0 |
| Case 107 | 16 | 88,165      | 1,877,618   | 3 | 2 | 5 | 0 |
| Case 107 | 16 | 1,877,747   | 35,285,582  | 2 | 2 | 4 | 0 |
| Case 107 | 16 | 46,450,037  | 52,997,863  | 3 | 2 | 5 | 0 |
| Case 107 | 16 | 53,010,486  | 53,321,892  | 6 | 2 | 8 | 0 |
| Case 107 | 16 | 53,326,860  | 54,974,683  | 4 | 2 | 6 | 0 |
| Case 107 | 16 | 54,984,823  | 55,843,252  | 5 | 2 | 7 | 0 |
| Case 107 | 16 | 55,844,609  | 90,274,695  | 2 | 2 | 4 | 0 |
| Case 107 | 17 | 11,885      | 4,315,506   | 2 | 2 | 4 | 0 |
| Case 107 | 17 | 4,319,606   | 4,385,503   | 3 | 2 | 5 | 0 |
| Case 107 | 17 | 4,385,616   | 20,681,137  | 2 | 2 | 4 | 0 |
| Case 107 | 17 | 20,682,586  | 22,242,355  | 3 | 2 | 5 | 0 |
| Case 107 | 17 | 25,268,142  | 43,333,215  | 3 | 2 | 5 | 0 |
| Case 107 | 17 | 43,333,317  | 55,227,670  | 2 | 2 | 4 | 0 |
| Case 107 | 17 | 55,231,043  | 55,290,902  | 3 | 2 | 5 | 0 |
| Case 107 | 17 | 55,300,237  | 56,583,547  | 2 | 2 | 4 | 0 |
| Case 107 | 17 | 56,584,205  | 69,111,098  | 3 | 2 | 5 | 0 |
| Case 107 | 17 | 69,115,146  | 70,004,689  | 2 | 2 | 4 | 0 |
| Case 107 | 17 | 70,015,234  | 75,898,770  | 3 | 2 | 5 | 0 |
| Case 107 | 17 | 75,901,182  | 76,087,662  | 2 | 2 | 4 | 0 |
| Case 107 | 17 | 76,089,062  | 78,993,517  | 3 | 2 | 5 | 0 |
| Case 107 | 17 | 79,004,616  | 79,017,259  | 3 | 3 | 6 | 0 |
| Case 107 | 17 | 79,017,767  | 81,060,040  | 3 | 2 | 5 | 0 |
| Case 107 | 18 | 87,505      | 15,375,878  | 2 | 2 | 4 | 0 |
| Case 107 | 18 | 18,520,354  | 78,015,180  | 2 | 2 | 4 | 0 |
| Case 107 | 19 | 260,912     | 603,749     | 3 | 2 | 5 | 0 |
| Case 107 | 19 | 606,473     | 3,084,944   | 2 | 2 | 4 | 0 |
| Case 107 | 19 | 3,093,163   | 3,252,909   | 3 | 2 | 5 | 0 |
| Case 107 | 19 | 3,253,630   | 24,629,285  | 2 | 2 | 4 | 0 |
| Case 107 | 19 | 27,732,159  | 59,097,160  | 2 | 2 | 4 | 0 |
| Case 107 | 20 | 63,244      | 145,853     | 3 | 2 | 5 | 0 |
| Case 107 | 20 | 153,267     | 23,375,624  | 2 | 2 | 4 | 0 |
| Case 107 | 20 | 23,377,717  | 23,847,180  | 4 | 2 | 6 | 0 |
| Case 107 | 20 | 23,852,131  | 23,906,106  | 5 | 2 | 7 | 0 |
| Case 107 | 20 | 23,907,744  | 25,305,250  | 4 | 2 | 6 | 0 |
| Case 107 | 20 | 25,319,976  | 26,293,985  | 3 | 2 | 5 | 0 |
| Case 107 | 20 | 29,425,357  | 42,983,135  | 3 | 2 | 5 | 0 |
| Case 107 | 20 | 42,985,355  | 43,384,935  | 4 | 2 | 6 | 0 |
| Case 107 | 20 | 43,396,214  | 62,948,788  | 3 | 2 | 5 | 0 |
| Case 107 | 21 | 10,827,533  | 10,971,337  | 2 | 2 | 4 | 0 |
| Case 107 | 21 | 14,368,320  | 48,100,155  | 2 | 2 | 4 | 0 |
| Case 107 | 22 | 16,114,244  | 47,663,026  | 2 | 2 | 4 | 0 |
| Case 107 | 22 | 47,665,229  | 47,688,227  | 3 | 2 | 5 | 0 |
| Case 107 | 22 | 47,701,711  | 51,195,728  | 2 | 2 | 4 | 0 |
| Case 107 | X  | 2,700,157   | 58,488,110  | 2 | 1 | 3 | 0 |
| Case 107 | X  | 61,694,576  | 154,898,561 | 2 | 1 | 3 | 0 |
| Case 108 | 1  | 82,154      | 70,744,507  | 2 | 0 | 2 | 1 |
| Case 108 | 1  | 70,750,558  | 70,986,547  | 1 | 0 | 1 | 0 |
| Case 108 | 1  | 70,990,002  | 96,566,226  | 2 | 0 | 2 | 1 |
| Case 108 | 1  | 96,578,814  | 98,948,007  | 2 | 1 | 3 | 0 |
| Case 108 | 1  | 98,952,064  | 111,276,629 | 2 | 0 | 2 | 1 |
| Case 108 | 1  | 111,288,171 | 111,528,570 | 3 | 1 | 4 | 0 |
| Case 108 | 1  | 111,531,126 | 111,661,528 | 6 | 1 | 7 | 0 |

|          |   |             |             |   |   |   |   |
|----------|---|-------------|-------------|---|---|---|---|
| Case 108 | 1 | 111,663,161 | 112,156,965 | 4 | 1 | 5 | 0 |
| Case 108 | 1 | 112,161,635 | 114,535,695 | 2 | 0 | 2 | 1 |
| Case 108 | 1 | 114,539,586 | 119,104,373 | 2 | 1 | 3 | 0 |
| Case 108 | 1 | 119,106,612 | 119,261,126 | 4 | 1 | 5 | 0 |
| Case 108 | 1 | 119,277,851 | 119,555,759 | 3 | 1 | 4 | 0 |
| Case 108 | 1 | 119,562,382 | 120,471,739 | 4 | 1 | 5 | 0 |
| Case 108 | 1 | 120,478,125 | 121,346,616 | 2 | 0 | 2 | 1 |
| Case 108 | 1 | 142,649,718 | 151,836,824 | 1 | 1 | 2 | 0 |
| Case 108 | 1 | 151,844,396 | 153,303,392 | 2 | 1 | 3 | 0 |
| Case 108 | 1 | 153,303,930 | 157,101,245 | 1 | 1 | 2 | 0 |
| Case 108 | 1 | 157,102,453 | 158,089,212 | 2 | 1 | 3 | 0 |
| Case 108 | 1 | 158,100,580 | 162,014,978 | 1 | 1 | 2 | 0 |
| Case 108 | 1 | 162,016,704 | 167,015,608 | 2 | 1 | 3 | 0 |
| Case 108 | 1 | 167,016,853 | 168,282,491 | 1 | 1 | 2 | 0 |
| Case 108 | 1 | 168,285,045 | 173,494,019 | 2 | 1 | 3 | 0 |
| Case 108 | 1 | 173,494,045 | 175,859,765 | 1 | 1 | 2 | 0 |
| Case 108 | 1 | 175,866,247 | 199,445,517 | 2 | 1 | 3 | 0 |
| Case 108 | 1 | 199,449,355 | 207,568,003 | 1 | 1 | 2 | 0 |
| Case 108 | 1 | 207,569,884 | 235,276,289 | 2 | 1 | 3 | 0 |
| Case 108 | 1 | 235,279,448 | 237,504,759 | 1 | 1 | 2 | 0 |
| Case 108 | 1 | 237,516,073 | 239,446,740 | 2 | 1 | 3 | 0 |
| Case 108 | 1 | 239,453,106 | 249,218,992 | 1 | 1 | 2 | 0 |
| Case 108 | 2 | 18,674      | 189,972     | 4 | 1 | 5 | 0 |
| Case 108 | 2 | 193,882     | 4,146,859   | 3 | 1 | 4 | 0 |
| Case 108 | 2 | 4,147,979   | 4,974,397   | 4 | 1 | 5 | 0 |
| Case 108 | 2 | 4,974,780   | 5,001,482   | 3 | 1 | 4 | 0 |
| Case 108 | 2 | 5,173,840   | 77,020,219  | 1 | 1 | 2 | 0 |
| Case 108 | 2 | 77,021,928  | 77,048,896  | 2 | 1 | 3 | 0 |
| Case 108 | 2 | 77,049,269  | 92,081,640  | 1 | 1 | 2 | 0 |
| Case 108 | 2 | 95,429,424  | 155,038,788 | 1 | 1 | 2 | 0 |
| Case 108 | 2 | 155,053,140 | 156,011,900 | 1 | 0 | 1 | 0 |
| Case 108 | 2 | 156,023,165 | 184,613,551 | 1 | 1 | 2 | 0 |
| Case 108 | 2 | 184,614,354 | 185,212,246 | 1 | 0 | 1 | 0 |
| Case 108 | 2 | 185,217,338 | 243,048,760 | 1 | 1 | 2 | 0 |
| Case 108 | 3 | 61,495      | 60,871,882  | 2 | 0 | 2 | 1 |
| Case 108 | 3 | 60,874,077  | 61,239,571  | 0 | 0 | 0 | 0 |
| Case 108 | 3 | 61,241,178  | 84,585,678  | 2 | 0 | 2 | 1 |
| Case 108 | 3 | 84,623,711  | 90,442,925  | 2 | 1 | 3 | 0 |
| Case 108 | 3 | 93,537,290  | 99,031,898  | 2 | 0 | 2 | 1 |
| Case 108 | 3 | 99,034,331  | 117,532,231 | 2 | 1 | 3 | 0 |
| Case 108 | 3 | 117,537,439 | 117,554,999 | 1 | 1 | 2 | 0 |
| Case 108 | 3 | 117,562,436 | 174,980,057 | 2 | 1 | 3 | 0 |
| Case 108 | 3 | 174,980,714 | 175,216,853 | 1 | 1 | 2 | 0 |
| Case 108 | 3 | 175,218,006 | 197,766,946 | 2 | 1 | 3 | 0 |
| Case 108 | 3 | 197,775,758 | 197,817,520 | 4 | 1 | 5 | 0 |
| Case 108 | 3 | 197,817,764 | 197,838,262 | 3 | 1 | 4 | 0 |
| Case 108 | 4 | 71,566      | 49,620,898  | 2 | 0 | 2 | 1 |
| Case 108 | 4 | 52,697,856  | 58,412,269  | 2 | 0 | 2 | 1 |
| Case 108 | 4 | 58,412,380  | 58,655,901  | 1 | 0 | 1 | 0 |
| Case 108 | 4 | 58,662,041  | 61,978,764  | 2 | 0 | 2 | 1 |
| Case 108 | 4 | 61,982,096  | 63,084,429  | 1 | 0 | 1 | 0 |
| Case 108 | 4 | 63,096,403  | 64,625,606  | 2 | 0 | 2 | 1 |
| Case 108 | 4 | 64,662,510  | 75,911,758  | 3 | 0 | 3 | 1 |
| Case 108 | 4 | 75,929,358  | 84,525,829  | 2 | 0 | 2 | 1 |
| Case 108 | 4 | 84,526,275  | 84,879,860  | 3 | 0 | 3 | 1 |
| Case 108 | 4 | 84,880,846  | 85,654,590  | 4 | 0 | 4 | 1 |
| Case 108 | 4 | 85,661,400  | 90,126,898  | 1 | 0 | 1 | 0 |
| Case 108 | 4 | 90,126,909  | 160,857,395 | 2 | 0 | 2 | 1 |
| Case 108 | 4 | 160,863,267 | 184,694,074 | 1 | 0 | 1 | 0 |
| Case 108 | 4 | 184,694,959 | 185,532,342 | 2 | 0 | 2 | 1 |
| Case 108 | 4 | 185,533,691 | 190,963,766 | 1 | 0 | 1 | 0 |

|          |   |             |             |   |   |   |   |
|----------|---|-------------|-------------|---|---|---|---|
| Case 108 | 5 | 38,139      | 38,716,873  | 1 | 1 | 2 | 0 |
| Case 108 | 5 | 38,722,734  | 38,757,335  | 4 | 0 | 4 | 1 |
| Case 108 | 5 | 38,761,236  | 39,021,044  | 4 | 1 | 5 | 0 |
| Case 108 | 5 | 39,054,434  | 40,098,605  | 3 | 1 | 4 | 0 |
| Case 108 | 5 | 40,121,487  | 40,188,442  | 4 | 1 | 5 | 0 |
| Case 108 | 5 | 40,189,966  | 40,210,933  | 5 | 1 | 6 | 0 |
| Case 108 | 5 | 40,217,324  | 40,559,387  | 3 | 1 | 4 | 0 |
| Case 108 | 5 | 40,573,745  | 40,678,049  | 4 | 1 | 5 | 0 |
| Case 108 | 5 | 40,679,789  | 44,066,093  | 3 | 1 | 4 | 0 |
| Case 108 | 5 | 44,066,669  | 46,399,093  | 4 | 1 | 5 | 0 |
| Case 108 | 5 | 49,457,282  | 49,457,282  | 4 | 1 | 5 | 0 |
| Case 108 | 5 | 49,470,083  | 51,059,051  | 2 | 0 | 2 | 1 |
| Case 108 | 5 | 51,070,843  | 51,282,797  | 4 | 1 | 5 | 0 |
| Case 108 | 5 | 51,283,559  | 51,535,809  | 6 | 1 | 7 | 0 |
| Case 108 | 5 | 51,538,538  | 51,649,222  | 4 | 1 | 5 | 0 |
| Case 108 | 5 | 51,655,244  | 53,519,661  | 5 | 1 | 6 | 0 |
| Case 108 | 5 | 53,520,792  | 54,026,811  | 4 | 1 | 5 | 0 |
| Case 108 | 5 | 54,031,153  | 54,674,296  | 3 | 1 | 4 | 0 |
| Case 108 | 5 | 54,674,967  | 61,480,289  | 2 | 0 | 2 | 1 |
| Case 108 | 5 | 61,496,655  | 65,519,426  | 1 | 0 | 1 | 0 |
| Case 108 | 5 | 65,522,888  | 68,364,871  | 2 | 0 | 2 | 1 |
| Case 108 | 5 | 68,366,457  | 70,998,053  | 1 | 0 | 1 | 0 |
| Case 108 | 5 | 71,002,954  | 73,927,752  | 2 | 0 | 2 | 1 |
| Case 108 | 5 | 73,931,260  | 95,089,373  | 1 | 0 | 1 | 0 |
| Case 108 | 5 | 95,091,201  | 98,115,642  | 2 | 0 | 2 | 1 |
| Case 108 | 5 | 98,115,932  | 105,854,131 | 1 | 0 | 1 | 0 |
| Case 108 | 5 | 105,866,862 | 119,600,902 | 2 | 0 | 2 | 1 |
| Case 108 | 5 | 119,603,547 | 121,106,601 | 1 | 0 | 1 | 0 |
| Case 108 | 5 | 121,110,144 | 161,447,161 | 2 | 0 | 2 | 1 |
| Case 108 | 5 | 161,453,085 | 167,104,317 | 1 | 0 | 1 | 0 |
| Case 108 | 5 | 167,115,062 | 178,099,758 | 2 | 0 | 2 | 1 |
| Case 108 | 5 | 178,100,927 | 178,513,141 | 1 | 0 | 1 | 0 |
| Case 108 | 5 | 178,516,483 | 180,693,127 | 2 | 0 | 2 | 1 |
| Case 108 | 6 | 108,666     | 6,816,332   | 2 | 1 | 3 | 0 |
| Case 108 | 6 | 6,817,791   | 7,156,901   | 2 | 0 | 2 | 1 |
| Case 108 | 6 | 7,166,238   | 30,425,337  | 2 | 1 | 3 | 0 |
| Case 108 | 6 | 30,425,943  | 32,180,120  | 1 | 1 | 2 | 0 |
| Case 108 | 6 | 32,180,241  | 41,688,990  | 2 | 1 | 3 | 0 |
| Case 108 | 6 | 41,694,772  | 43,634,036  | 1 | 1 | 2 | 0 |
| Case 108 | 6 | 43,638,636  | 58,752,089  | 2 | 1 | 3 | 0 |
| Case 108 | 6 | 61,891,118  | 147,847,101 | 2 | 1 | 3 | 0 |
| Case 108 | 6 | 147,847,523 | 147,977,738 | 1 | 1 | 2 | 0 |
| Case 108 | 6 | 147,985,603 | 153,402,841 | 2 | 1 | 3 | 0 |
| Case 108 | 6 | 153,404,825 | 170,980,171 | 1 | 1 | 2 | 0 |
| Case 108 | 7 | 44,935      | 25,365,550  | 2 | 0 | 2 | 1 |
| Case 108 | 7 | 25,368,902  | 25,676,893  | 2 | 1 | 3 | 0 |
| Case 108 | 7 | 25,679,204  | 50,180,972  | 2 | 0 | 2 | 1 |
| Case 108 | 7 | 50,182,079  | 58,019,061  | 2 | 1 | 3 | 0 |
| Case 108 | 7 | 61,056,053  | 61,747,794  | 2 | 1 | 3 | 0 |
| Case 108 | 7 | 61,852,895  | 159,119,486 | 2 | 0 | 2 | 1 |
| Case 108 | 8 | 164,984     | 22,262,321  | 2 | 1 | 3 | 0 |
| Case 108 | 8 | 22,262,418  | 23,714,609  | 2 | 0 | 2 | 1 |
| Case 108 | 8 | 23,724,908  | 43,791,691  | 2 | 1 | 3 | 0 |
| Case 108 | 8 | 46,886,735  | 117,836,620 | 2 | 1 | 3 | 0 |
| Case 108 | 8 | 117,838,623 | 118,722,494 | 3 | 1 | 4 | 0 |
| Case 108 | 8 | 118,726,160 | 146,293,414 | 2 | 1 | 3 | 0 |
| Case 108 | 9 | 46,587      | 9,211,973   | 1 | 0 | 1 | 0 |
| Case 108 | 9 | 9,214,833   | 9,864,454   | 0 | 0 | 0 | 0 |
| Case 108 | 9 | 9,881,511   | 32,784,875  | 1 | 0 | 1 | 0 |
| Case 108 | 9 | 32,785,076  | 38,770,134  | 3 | 0 | 3 | 1 |
| Case 108 | 9 | 38,771,460  | 46,944,322  | 2 | 0 | 2 | 1 |

|          |    |             |             |   |   |   |   |
|----------|----|-------------|-------------|---|---|---|---|
| Case 108 | 9  | 65,629,772  | 71,114,210  | 2 | 1 | 3 | 0 |
| Case 108 | 9  | 71,114,248  | 71,851,954  | 3 | 1 | 4 | 0 |
| Case 108 | 9  | 71,852,004  | 73,149,151  | 4 | 1 | 5 | 0 |
| Case 108 | 9  | 73,149,897  | 75,729,671  | 3 | 1 | 4 | 0 |
| Case 108 | 9  | 75,730,317  | 76,775,785  | 2 | 1 | 3 | 0 |
| Case 108 | 9  | 76,786,297  | 108,854,018 | 1 | 1 | 2 | 0 |
| Case 108 | 9  | 108,857,533 | 109,160,164 | 2 | 1 | 3 | 0 |
| Case 108 | 9  | 109,162,816 | 109,618,643 | 3 | 1 | 4 | 0 |
| Case 108 | 9  | 109,624,255 | 110,668,683 | 2 | 1 | 3 | 0 |
| Case 108 | 9  | 110,677,097 | 110,843,927 | 3 | 1 | 4 | 0 |
| Case 108 | 9  | 110,844,942 | 112,165,546 | 1 | 1 | 2 | 0 |
| Case 108 | 9  | 112,166,821 | 113,646,892 | 2 | 1 | 3 | 0 |
| Case 108 | 9  | 113,648,839 | 114,027,937 | 3 | 1 | 4 | 0 |
| Case 108 | 9  | 114,030,915 | 114,421,679 | 2 | 1 | 3 | 0 |
| Case 108 | 9  | 114,423,433 | 115,662,517 | 3 | 1 | 4 | 0 |
| Case 108 | 9  | 115,666,561 | 116,421,786 | 2 | 1 | 3 | 0 |
| Case 108 | 9  | 116,432,208 | 141,066,491 | 1 | 1 | 2 | 0 |
| Case 108 | 10 | 98,087      | 4,437,173   | 1 | 1 | 2 | 0 |
| Case 108 | 10 | 4,437,754   | 5,618,776   | 2 | 1 | 3 | 0 |
| Case 108 | 10 | 5,621,628   | 25,419,620  | 1 | 1 | 2 | 0 |
| Case 108 | 10 | 25,428,658  | 25,849,053  | 2 | 1 | 3 | 0 |
| Case 108 | 10 | 25,853,401  | 39,097,912  | 1 | 1 | 2 | 0 |
| Case 108 | 10 | 42,436,301  | 52,789,016  | 1 | 1 | 2 | 0 |
| Case 108 | 10 | 52,792,194  | 59,582,901  | 2 | 1 | 3 | 0 |
| Case 108 | 10 | 59,588,583  | 61,881,937  | 1 | 1 | 2 | 0 |
| Case 108 | 10 | 61,882,020  | 69,366,675  | 2 | 1 | 3 | 0 |
| Case 108 | 10 | 69,366,752  | 81,863,021  | 1 | 1 | 2 | 0 |
| Case 108 | 10 | 81,863,964  | 81,895,970  | 2 | 1 | 3 | 0 |
| Case 108 | 10 | 81,900,893  | 82,685,062  | 1 | 1 | 2 | 0 |
| Case 108 | 10 | 82,696,713  | 84,655,185  | 2 | 1 | 3 | 0 |
| Case 108 | 10 | 84,656,170  | 90,028,352  | 1 | 1 | 2 | 0 |
| Case 108 | 10 | 90,029,028  | 92,302,869  | 2 | 1 | 3 | 0 |
| Case 108 | 10 | 92,303,944  | 106,253,104 | 1 | 1 | 2 | 0 |
| Case 108 | 10 | 106,253,793 | 108,159,560 | 2 | 1 | 3 | 0 |
| Case 108 | 10 | 108,160,539 | 135,477,883 | 1 | 1 | 2 | 0 |
| Case 108 | 11 | 193,146     | 21,600,567  | 1 | 1 | 2 | 0 |
| Case 108 | 11 | 21,601,797  | 22,539,603  | 3 | 1 | 4 | 0 |
| Case 108 | 11 | 22,540,139  | 22,755,093  | 1 | 1 | 2 | 0 |
| Case 108 | 11 | 22,758,660  | 22,881,341  | 4 | 1 | 5 | 0 |
| Case 108 | 11 | 22,881,542  | 23,224,499  | 3 | 1 | 4 | 0 |
| Case 108 | 11 | 23,224,901  | 23,533,754  | 6 | 1 | 7 | 0 |
| Case 108 | 11 | 23,533,902  | 23,815,456  | 4 | 1 | 5 | 0 |
| Case 108 | 11 | 23,816,444  | 24,061,085  | 6 | 1 | 7 | 0 |
| Case 108 | 11 | 24,073,794  | 24,236,096  | 4 | 1 | 5 | 0 |
| Case 108 | 11 | 24,246,904  | 24,440,965  | 3 | 1 | 4 | 0 |
| Case 108 | 11 | 24,446,873  | 24,772,667  | 2 | 1 | 3 | 0 |
| Case 108 | 11 | 24,774,037  | 24,822,669  | 3 | 1 | 4 | 0 |
| Case 108 | 11 | 24,829,963  | 39,700,963  | 1 | 1 | 2 | 0 |
| Case 108 | 11 | 39,709,068  | 40,105,120  | 4 | 1 | 5 | 0 |
| Case 108 | 11 | 40,105,881  | 45,001,728  | 1 | 1 | 2 | 0 |
| Case 108 | 11 | 45,009,133  | 45,913,652  | 3 | 1 | 4 | 0 |
| Case 108 | 11 | 45,922,690  | 46,297,631  | 4 | 0 | 4 | 1 |
| Case 108 | 11 | 46,300,722  | 46,575,394  | 3 | 1 | 4 | 0 |
| Case 108 | 11 | 46,596,674  | 46,751,085  | 2 | 0 | 2 | 1 |
| Case 108 | 11 | 46,760,913  | 48,050,995  | 3 | 1 | 4 | 0 |
| Case 108 | 11 | 48,051,442  | 48,116,232  | 4 | 1 | 5 | 0 |
| Case 108 | 11 | 48,117,873  | 48,373,849  | 3 | 1 | 4 | 0 |
| Case 108 | 11 | 48,375,604  | 49,093,987  | 4 | 1 | 5 | 0 |
| Case 108 | 11 | 49,120,746  | 50,238,588  | 2 | 1 | 3 | 0 |
| Case 108 | 11 | 50,241,556  | 50,697,498  | 1 | 1 | 2 | 0 |
| Case 108 | 11 | 51,095,992  | 51,474,852  | 2 | 1 | 3 | 0 |

|          |    |             |             |   |   |   |   |
|----------|----|-------------|-------------|---|---|---|---|
| Case 108 | 11 | 51,478,072  | 51,591,253  | 1 | 1 | 2 | 0 |
| Case 108 | 11 | 54,794,237  | 66,348,648  | 1 | 1 | 2 | 0 |
| Case 108 | 11 | 66,358,126  | 67,190,928  | 3 | 1 | 4 | 0 |
| Case 108 | 11 | 67,191,327  | 69,084,550  | 1 | 1 | 2 | 0 |
| Case 108 | 11 | 69,087,550  | 69,248,131  | 3 | 2 | 5 | 0 |
| Case 108 | 11 | 69,252,000  | 69,281,578  | 1 | 1 | 2 | 0 |
| Case 108 | 11 | 69,282,036  | 69,351,911  | 2 | 0 | 2 | 1 |
| Case 108 | 11 | 69,364,292  | 69,818,523  | 4 | 0 | 4 | 1 |
| Case 108 | 11 | 69,820,567  | 69,870,778  | 3 | 0 | 3 | 1 |
| Case 108 | 11 | 69,871,289  | 69,896,252  | 2 | 1 | 3 | 0 |
| Case 108 | 11 | 69,901,274  | 134,934,063 | 1 | 1 | 2 | 0 |
| Case 108 | 12 | 191,619     | 34,853,011  | 2 | 0 | 2 | 1 |
| Case 108 | 12 | 37,876,400  | 89,576,400  | 2 | 0 | 2 | 1 |
| Case 108 | 12 | 89,577,715  | 120,575,778 | 3 | 0 | 3 | 1 |
| Case 108 | 12 | 120,580,323 | 133,810,935 | 2 | 0 | 2 | 1 |
| Case 108 | 13 | 19,058,717  | 27,979,558  | 1 | 1 | 2 | 0 |
| Case 108 | 13 | 27,981,532  | 28,286,430  | 1 | 0 | 1 | 0 |
| Case 108 | 13 | 28,286,672  | 29,552,602  | 1 | 1 | 2 | 0 |
| Case 108 | 13 | 29,553,229  | 35,451,150  | 2 | 1 | 3 | 0 |
| Case 108 | 13 | 35,455,773  | 115,103,529 | 1 | 1 | 2 | 0 |
| Case 108 | 14 | 19,280,733  | 22,456,361  | 1 | 1 | 2 | 0 |
| Case 108 | 14 | 22,458,695  | 22,963,646  | 2 | 1 | 3 | 0 |
| Case 108 | 14 | 22,964,782  | 32,589,339  | 1 | 1 | 2 | 0 |
| Case 108 | 14 | 32,592,200  | 38,299,266  | 2 | 1 | 3 | 0 |
| Case 108 | 14 | 38,307,511  | 85,287,983  | 1 | 1 | 2 | 0 |
| Case 108 | 14 | 85,293,938  | 107,287,663 | 2 | 1 | 3 | 0 |
| Case 108 | 15 | 20,034,919  | 102,461,162 | 2 | 0 | 2 | 1 |
| Case 108 | 16 | 88,165      | 35,285,582  | 2 | 1 | 3 | 0 |
| Case 108 | 16 | 46,450,037  | 90,274,695  | 2 | 1 | 3 | 0 |
| Case 108 | 17 | 11,885      | 1,204,864   | 2 | 0 | 2 | 1 |
| Case 108 | 17 | 1,206,042   | 2,553,152   | 2 | 1 | 3 | 0 |
| Case 108 | 17 | 2,553,836   | 22,242,355  | 2 | 0 | 2 | 1 |
| Case 108 | 17 | 25,268,142  | 28,382,984  | 2 | 0 | 2 | 1 |
| Case 108 | 17 | 28,383,709  | 29,325,782  | 2 | 1 | 3 | 0 |
| Case 108 | 17 | 29,326,155  | 32,731,049  | 2 | 0 | 2 | 1 |
| Case 108 | 17 | 32,735,169  | 33,214,359  | 2 | 1 | 3 | 0 |
| Case 108 | 17 | 33,214,714  | 33,872,797  | 2 | 0 | 2 | 1 |
| Case 108 | 17 | 33,874,678  | 34,831,963  | 2 | 1 | 3 | 0 |
| Case 108 | 17 | 34,841,617  | 35,537,269  | 2 | 0 | 2 | 1 |
| Case 108 | 17 | 35,543,678  | 36,307,189  | 2 | 1 | 3 | 0 |
| Case 108 | 17 | 36,450,598  | 36,991,482  | 2 | 0 | 2 | 1 |
| Case 108 | 17 | 36,991,576  | 40,542,642  | 2 | 1 | 3 | 0 |
| Case 108 | 17 | 40,550,611  | 41,433,660  | 2 | 0 | 2 | 1 |
| Case 108 | 17 | 41,445,145  | 43,493,101  | 2 | 1 | 3 | 0 |
| Case 108 | 17 | 43,504,831  | 48,051,772  | 2 | 0 | 2 | 1 |
| Case 108 | 17 | 48,057,873  | 53,158,492  | 2 | 1 | 3 | 0 |
| Case 108 | 17 | 53,158,524  | 66,119,884  | 2 | 0 | 2 | 1 |
| Case 108 | 17 | 66,127,358  | 71,811,006  | 2 | 1 | 3 | 0 |
| Case 108 | 17 | 71,812,516  | 71,916,715  | 2 | 0 | 2 | 1 |
| Case 108 | 17 | 71,928,292  | 72,174,922  | 2 | 1 | 3 | 0 |
| Case 108 | 17 | 72,178,448  | 74,573,532  | 2 | 0 | 2 | 1 |
| Case 108 | 17 | 74,574,103  | 81,060,040  | 2 | 1 | 3 | 0 |
| Case 108 | 18 | 87,505      | 15,075,994  | 1 | 0 | 1 | 0 |
| Case 108 | 18 | 15,082,789  | 15,375,878  | 3 | 1 | 4 | 0 |
| Case 108 | 18 | 18,520,354  | 20,128,882  | 3 | 1 | 4 | 0 |
| Case 108 | 18 | 20,132,564  | 26,490,208  | 1 | 0 | 1 | 0 |
| Case 108 | 18 | 26,492,729  | 29,124,424  | 4 | 1 | 5 | 0 |
| Case 108 | 18 | 29,125,854  | 29,963,308  | 3 | 1 | 4 | 0 |
| Case 108 | 18 | 29,964,730  | 31,788,458  | 4 | 1 | 5 | 0 |
| Case 108 | 18 | 31,813,635  | 32,373,736  | 1 | 0 | 1 | 0 |
| Case 108 | 18 | 32,373,873  | 36,068,971  | 3 | 1 | 4 | 0 |



|          |    |             |             |   |   |   |   |
|----------|----|-------------|-------------|---|---|---|---|
| Case 108 | 18 | 36,083,127  | 78,015,180  | 1 | 0 | 1 | 0 |
| Case 108 | 19 | 260,912     | 24,629,285  | 2 | 0 | 2 | 1 |
| Case 108 | 19 | 27,732,159  | 59,097,160  | 2 | 0 | 2 | 1 |
| Case 108 | 20 | 63,244      | 26,293,985  | 2 | 1 | 3 | 0 |
| Case 108 | 20 | 29,425,357  | 62,948,788  | 2 | 1 | 3 | 0 |
| Case 108 | 21 | 10,827,533  | 10,971,337  | 2 | 0 | 2 | 1 |
| Case 108 | 21 | 14,368,320  | 48,100,155  | 2 | 0 | 2 | 1 |
| Case 108 | 22 | 16,114,244  | 51,195,728  | 2 | 0 | 2 | 1 |
| Case 108 | X  | 2,700,157   | 58,488,110  | 2 | 0 | 2 | 1 |
| Case 108 | X  | 61,694,576  | 84,569,502  | 2 | 0 | 2 | 1 |
| Case 108 | X  | 84,569,508  | 84,670,926  | 0 | 0 | 0 | 0 |
| Case 108 | X  | 84,685,904  | 154,898,561 | 2 | 0 | 2 | 1 |
| Case 109 | 1  | 82,154      | 3,809,520   | 1 | 1 | 2 | 0 |
| Case 109 | 1  | 3,809,544   | 5,748,611   | 2 | 1 | 3 | 0 |
| Case 109 | 1  | 5,750,013   | 9,897,001   | 1 | 1 | 2 | 0 |
| Case 109 | 1  | 9,898,433   | 16,475,173  | 3 | 1 | 4 | 0 |
| Case 109 | 1  | 16,475,203  | 27,272,844  | 1 | 1 | 2 | 0 |
| Case 109 | 1  | 27,272,864  | 27,890,533  | 1 | 0 | 1 | 0 |
| Case 109 | 1  | 27,930,898  | 43,353,134  | 1 | 1 | 2 | 0 |
| Case 109 | 1  | 43,356,211  | 43,543,617  | 2 | 1 | 3 | 0 |
| Case 109 | 1  | 43,557,168  | 121,346,616 | 1 | 1 | 2 | 0 |
| Case 109 | 1  | 142,649,718 | 179,833,929 | 3 | 1 | 4 | 0 |
| Case 109 | 1  | 179,841,753 | 180,513,655 | 2 | 1 | 3 | 0 |
| Case 109 | 1  | 180,516,881 | 185,201,061 | 3 | 1 | 4 | 0 |
| Case 109 | 1  | 185,211,545 | 185,646,286 | 2 | 1 | 3 | 0 |
| Case 109 | 1  | 185,675,592 | 200,080,463 | 3 | 1 | 4 | 0 |
| Case 109 | 1  | 200,083,654 | 201,029,866 | 2 | 1 | 3 | 0 |
| Case 109 | 1  | 201,030,668 | 206,967,152 | 3 | 1 | 4 | 0 |
| Case 109 | 1  | 206,968,893 | 208,569,243 | 2 | 1 | 3 | 0 |
| Case 109 | 1  | 208,578,200 | 213,743,746 | 3 | 1 | 4 | 0 |
| Case 109 | 1  | 213,743,905 | 214,242,637 | 2 | 1 | 3 | 0 |
| Case 109 | 1  | 214,268,998 | 219,967,811 | 3 | 1 | 4 | 0 |
| Case 109 | 1  | 219,968,010 | 220,226,732 | 2 | 1 | 3 | 0 |
| Case 109 | 1  | 220,228,658 | 221,365,849 | 3 | 1 | 4 | 0 |
| Case 109 | 1  | 221,377,435 | 221,966,781 | 4 | 1 | 5 | 0 |
| Case 109 | 1  | 221,968,224 | 241,168,535 | 3 | 1 | 4 | 0 |
| Case 109 | 1  | 241,170,150 | 241,882,665 | 2 | 1 | 3 | 0 |
| Case 109 | 1  | 241,885,307 | 247,920,961 | 3 | 1 | 4 | 0 |
| Case 109 | 1  | 247,921,083 | 249,218,992 | 2 | 1 | 3 | 0 |
| Case 109 | 2  | 18,674      | 31,986,063  | 2 | 1 | 3 | 0 |
| Case 109 | 2  | 32,014,315  | 38,729,008  | 1 | 1 | 2 | 0 |
| Case 109 | 2  | 38,730,273  | 38,839,323  | 2 | 1 | 3 | 0 |
| Case 109 | 2  | 38,845,701  | 38,936,539  | 1 | 1 | 2 | 0 |
| Case 109 | 2  | 38,940,316  | 39,204,040  | 3 | 1 | 4 | 0 |
| Case 109 | 2  | 39,209,047  | 40,846,875  | 4 | 1 | 5 | 0 |
| Case 109 | 2  | 40,848,550  | 41,016,149  | 5 | 1 | 6 | 0 |
| Case 109 | 2  | 41,024,301  | 48,566,031  | 4 | 1 | 5 | 0 |
| Case 109 | 2  | 48,579,778  | 48,644,275  | 5 | 1 | 6 | 0 |
| Case 109 | 2  | 48,646,399  | 52,461,739  | 4 | 1 | 5 | 0 |
| Case 109 | 2  | 52,461,984  | 52,668,651  | 2 | 1 | 3 | 0 |
| Case 109 | 2  | 52,690,141  | 53,099,305  | 4 | 1 | 5 | 0 |
| Case 109 | 2  | 53,101,066  | 64,928,603  | 2 | 1 | 3 | 0 |
| Case 109 | 2  | 64,936,472  | 65,221,184  | 3 | 1 | 4 | 0 |
| Case 109 | 2  | 65,231,096  | 92,081,640  | 2 | 1 | 3 | 0 |
| Case 109 | 2  | 95,429,424  | 203,765,800 | 2 | 1 | 3 | 0 |
| Case 109 | 2  | 203,772,630 | 203,848,342 | 3 | 1 | 4 | 0 |
| Case 109 | 2  | 203,854,586 | 243,048,760 | 2 | 1 | 3 | 0 |
| Case 109 | 3  | 61,495      | 21,280,306  | 2 | 1 | 3 | 0 |
| Case 109 | 3  | 21,280,562  | 30,211,349  | 1 | 1 | 2 | 0 |
| Case 109 | 3  | 30,225,323  | 30,549,626  | 3 | 1 | 4 | 0 |
| Case 109 | 3  | 30,554,212  | 45,153,422  | 1 | 1 | 2 | 0 |

|          |   |             |             |   |   |   |   |
|----------|---|-------------|-------------|---|---|---|---|
| Case 109 | 3 | 45,153,626  | 45,429,891  | 2 | 1 | 3 | 0 |
| Case 109 | 3 | 45,436,093  | 59,839,995  | 1 | 1 | 2 | 0 |
| Case 109 | 3 | 59,842,644  | 60,272,317  | 1 | 0 | 1 | 0 |
| Case 109 | 3 | 60,274,049  | 60,439,043  | 1 | 1 | 2 | 0 |
| Case 109 | 3 | 60,441,079  | 60,461,994  | 1 | 0 | 1 | 0 |
| Case 109 | 3 | 60,464,275  | 60,487,074  | 0 | 0 | 0 | 0 |
| Case 109 | 3 | 60,487,247  | 60,554,521  | 1 | 0 | 1 | 0 |
| Case 109 | 3 | 60,557,685  | 60,588,627  | 0 | 0 | 0 | 0 |
| Case 109 | 3 | 60,589,410  | 60,631,936  | 1 | 0 | 1 | 0 |
| Case 109 | 3 | 60,636,061  | 61,577,341  | 1 | 1 | 2 | 0 |
| Case 109 | 3 | 61,584,646  | 61,628,388  | 2 | 1 | 3 | 0 |
| Case 109 | 3 | 61,632,170  | 90,442,925  | 1 | 1 | 2 | 0 |
| Case 109 | 3 | 93,537,290  | 124,487,214 | 1 | 1 | 2 | 0 |
| Case 109 | 3 | 124,487,911 | 124,919,384 | 2 | 1 | 3 | 0 |
| Case 109 | 3 | 124,921,457 | 197,838,262 | 1 | 1 | 2 | 0 |
| Case 109 | 4 | 71,566      | 2,990,375   | 2 | 0 | 2 | 1 |
| Case 109 | 4 | 2,990,487   | 49,620,898  | 2 | 1 | 3 | 0 |
| Case 109 | 4 | 52,697,856  | 75,324,290  | 2 | 1 | 3 | 0 |
| Case 109 | 4 | 75,328,108  | 75,738,792  | 4 | 1 | 5 | 0 |
| Case 109 | 4 | 75,745,515  | 95,514,609  | 2 | 1 | 3 | 0 |
| Case 109 | 4 | 95,525,186  | 98,965,614  | 1 | 1 | 2 | 0 |
| Case 109 | 4 | 98,965,696  | 101,222,442 | 2 | 1 | 3 | 0 |
| Case 109 | 4 | 101,228,493 | 122,933,691 | 1 | 1 | 2 | 0 |
| Case 109 | 4 | 122,947,939 | 152,114,234 | 2 | 1 | 3 | 0 |
| Case 109 | 4 | 152,144,869 | 161,856,343 | 1 | 0 | 1 | 0 |
| Case 109 | 4 | 161,861,640 | 161,924,832 | 3 | 0 | 3 | 1 |
| Case 109 | 4 | 161,935,342 | 172,699,232 | 1 | 0 | 1 | 0 |
| Case 109 | 4 | 172,705,236 | 183,124,933 | 2 | 0 | 2 | 1 |
| Case 109 | 4 | 183,125,630 | 190,963,766 | 1 | 0 | 1 | 0 |
| Case 109 | 5 | 38,139      | 412,694     | 2 | 1 | 3 | 0 |
| Case 109 | 5 | 422,752     | 874,001     | 3 | 1 | 4 | 0 |
| Case 109 | 5 | 878,470     | 6,607,370   | 2 | 1 | 3 | 0 |
| Case 109 | 5 | 6,608,361   | 6,786,308   | 1 | 1 | 2 | 0 |
| Case 109 | 5 | 6,790,678   | 10,262,696  | 2 | 1 | 3 | 0 |
| Case 109 | 5 | 10,263,582  | 10,492,322  | 1 | 1 | 2 | 0 |
| Case 109 | 5 | 10,496,509  | 19,389,256  | 2 | 1 | 3 | 0 |
| Case 109 | 5 | 19,392,363  | 20,753,945  | 1 | 1 | 2 | 0 |
| Case 109 | 5 | 20,779,048  | 25,711,728  | 2 | 1 | 3 | 0 |
| Case 109 | 5 | 25,717,110  | 28,549,181  | 1 | 1 | 2 | 0 |
| Case 109 | 5 | 28,560,977  | 36,781,359  | 2 | 1 | 3 | 0 |
| Case 109 | 5 | 36,786,516  | 37,196,028  | 4 | 1 | 5 | 0 |
| Case 109 | 5 | 37,197,160  | 41,572,722  | 2 | 1 | 3 | 0 |
| Case 109 | 5 | 41,574,343  | 46,399,093  | 4 | 1 | 5 | 0 |
| Case 109 | 5 | 49,457,282  | 142,818,306 | 1 | 0 | 1 | 0 |
| Case 109 | 5 | 142,827,853 | 173,084,783 | 2 | 0 | 2 | 1 |
| Case 109 | 5 | 173,094,151 | 173,401,662 | 3 | 0 | 3 | 1 |
| Case 109 | 5 | 173,406,806 | 175,935,316 | 2 | 0 | 2 | 1 |
| Case 109 | 5 | 175,936,317 | 176,153,641 | 4 | 0 | 4 | 1 |
| Case 109 | 5 | 176,156,228 | 180,693,127 | 2 | 0 | 2 | 1 |
| Case 109 | 6 | 108,666     | 5,312,080   | 4 | 1 | 5 | 0 |
| Case 109 | 6 | 5,320,622   | 5,663,598   | 3 | 1 | 4 | 0 |
| Case 109 | 6 | 5,664,388   | 7,424,510   | 4 | 1 | 5 | 0 |
| Case 109 | 6 | 7,427,198   | 9,042,512   | 3 | 1 | 4 | 0 |
| Case 109 | 6 | 9,044,593   | 10,885,971  | 4 | 1 | 5 | 0 |
| Case 109 | 6 | 10,886,585  | 11,193,730  | 3 | 1 | 4 | 0 |
| Case 109 | 6 | 11,194,511  | 11,618,187  | 4 | 1 | 5 | 0 |
| Case 109 | 6 | 11,620,846  | 13,490,904  | 3 | 1 | 4 | 0 |
| Case 109 | 6 | 13,506,872  | 15,916,856  | 2 | 1 | 3 | 0 |
| Case 109 | 6 | 15,923,183  | 16,343,056  | 3 | 1 | 4 | 0 |
| Case 109 | 6 | 16,362,246  | 16,522,826  | 1 | 0 | 1 | 0 |
| Case 109 | 6 | 16,528,671  | 17,706,404  | 4 | 1 | 5 | 0 |

|          |   |             |             |   |   |   |   |
|----------|---|-------------|-------------|---|---|---|---|
| Case 109 | 6 | 17,706,524  | 17,896,035  | 2 | 1 | 3 | 0 |
| Case 109 | 6 | 17,905,008  | 20,092,949  | 4 | 1 | 5 | 0 |
| Case 109 | 6 | 20,096,334  | 21,847,916  | 3 | 1 | 4 | 0 |
| Case 109 | 6 | 21,856,821  | 22,693,005  | 4 | 1 | 5 | 0 |
| Case 109 | 6 | 22,694,829  | 30,199,016  | 3 | 1 | 4 | 0 |
| Case 109 | 6 | 30,200,873  | 30,824,532  | 4 | 1 | 5 | 0 |
| Case 109 | 6 | 30,825,220  | 30,942,284  | 3 | 1 | 4 | 0 |
| Case 109 | 6 | 30,942,387  | 31,011,247  | 4 | 1 | 5 | 0 |
| Case 109 | 6 | 31,011,662  | 32,651,894  | 3 | 1 | 4 | 0 |
| Case 109 | 6 | 32,652,359  | 32,797,620  | 4 | 1 | 5 | 0 |
| Case 109 | 6 | 32,797,684  | 33,080,359  | 3 | 1 | 4 | 0 |
| Case 109 | 6 | 33,080,360  | 33,127,987  | 4 | 1 | 5 | 0 |
| Case 109 | 6 | 33,128,377  | 34,384,852  | 3 | 1 | 4 | 0 |
| Case 109 | 6 | 34,389,360  | 34,579,431  | 4 | 1 | 5 | 0 |
| Case 109 | 6 | 34,592,731  | 39,920,347  | 3 | 1 | 4 | 0 |
| Case 109 | 6 | 39,925,922  | 42,515,372  | 4 | 1 | 5 | 0 |
| Case 109 | 6 | 42,531,650  | 43,618,147  | 3 | 1 | 4 | 0 |
| Case 109 | 6 | 43,618,257  | 46,580,382  | 4 | 1 | 5 | 0 |
| Case 109 | 6 | 46,582,156  | 46,598,263  | 5 | 1 | 6 | 0 |
| Case 109 | 6 | 46,599,187  | 47,649,356  | 4 | 1 | 5 | 0 |
| Case 109 | 6 | 47,649,573  | 50,029,391  | 3 | 1 | 4 | 0 |
| Case 109 | 6 | 50,041,852  | 58,150,777  | 2 | 1 | 3 | 0 |
| Case 109 | 6 | 58,168,152  | 58,752,089  | 1 | 1 | 2 | 0 |
| Case 109 | 6 | 61,891,118  | 62,759,028  | 3 | 1 | 4 | 0 |
| Case 109 | 6 | 62,761,262  | 62,850,877  | 5 | 1 | 6 | 0 |
| Case 109 | 6 | 62,865,650  | 63,199,731  | 3 | 1 | 4 | 0 |
| Case 109 | 6 | 63,209,941  | 63,534,312  | 3 | 0 | 3 | 1 |
| Case 109 | 6 | 63,543,538  | 63,733,495  | 2 | 0 | 2 | 1 |
| Case 109 | 6 | 63,746,291  | 68,503,143  | 2 | 2 | 4 | 0 |
| Case 109 | 6 | 68,526,511  | 72,595,779  | 2 | 0 | 2 | 1 |
| Case 109 | 6 | 72,602,564  | 76,119,602  | 2 | 2 | 4 | 0 |
| Case 109 | 6 | 76,124,523  | 105,997,617 | 2 | 0 | 2 | 1 |
| Case 109 | 6 | 106,000,830 | 106,461,835 | 3 | 0 | 3 | 1 |
| Case 109 | 6 | 106,468,486 | 124,698,568 | 2 | 0 | 2 | 1 |
| Case 109 | 6 | 124,699,827 | 137,489,567 | 2 | 2 | 4 | 0 |
| Case 109 | 6 | 137,495,707 | 167,830,327 | 2 | 1 | 3 | 0 |
| Case 109 | 6 | 167,830,592 | 169,672,120 | 2 | 0 | 2 | 1 |
| Case 109 | 6 | 169,678,116 | 170,980,171 | 2 | 1 | 3 | 0 |
| Case 109 | 7 | 44,935      | 7,052,237   | 2 | 1 | 3 | 0 |
| Case 109 | 7 | 7,052,481   | 39,607,399  | 3 | 2 | 5 | 0 |
| Case 109 | 7 | 39,608,877  | 39,695,873  | 4 | 2 | 6 | 0 |
| Case 109 | 7 | 39,713,821  | 41,659,417  | 3 | 2 | 5 | 0 |
| Case 109 | 7 | 41,662,627  | 41,971,266  | 4 | 3 | 7 | 0 |
| Case 109 | 7 | 41,973,509  | 43,908,661  | 3 | 2 | 5 | 0 |
| Case 109 | 7 | 43,908,975  | 45,335,689  | 2 | 2 | 4 | 0 |
| Case 109 | 7 | 45,336,250  | 47,408,702  | 3 | 2 | 5 | 0 |
| Case 109 | 7 | 47,408,712  | 48,090,640  | 2 | 2 | 4 | 0 |
| Case 109 | 7 | 48,092,486  | 53,980,226  | 3 | 2 | 5 | 0 |
| Case 109 | 7 | 53,982,626  | 54,430,805  | 4 | 3 | 7 | 0 |
| Case 109 | 7 | 54,439,565  | 58,019,061  | 3 | 2 | 5 | 0 |
| Case 109 | 7 | 61,056,053  | 73,520,558  | 3 | 2 | 5 | 0 |
| Case 109 | 7 | 73,523,347  | 77,046,222  | 2 | 2 | 4 | 0 |
| Case 109 | 7 | 77,047,056  | 97,595,215  | 3 | 2 | 5 | 0 |
| Case 109 | 7 | 97,602,656  | 100,473,729 | 2 | 2 | 4 | 0 |
| Case 109 | 7 | 100,474,289 | 102,079,461 | 2 | 1 | 3 | 0 |
| Case 109 | 7 | 102,079,764 | 104,107,166 | 3 | 1 | 4 | 0 |
| Case 109 | 7 | 104,110,492 | 138,886,066 | 2 | 1 | 3 | 0 |
| Case 109 | 7 | 138,916,654 | 141,793,419 | 3 | 1 | 4 | 0 |
| Case 109 | 7 | 141,795,061 | 142,030,318 | 3 | 0 | 3 | 1 |
| Case 109 | 7 | 142,032,983 | 151,896,365 | 3 | 1 | 4 | 0 |
| Case 109 | 7 | 151,902,197 | 152,277,531 | 2 | 0 | 2 | 1 |

|          |    |             |             |   |   |    |   |
|----------|----|-------------|-------------|---|---|----|---|
| Case 109 | 7  | 152,285,741 | 152,601,631 | 3 | 1 | 4  | 0 |
| Case 109 | 7  | 152,604,342 | 157,299,223 | 3 | 2 | 5  | 0 |
| Case 109 | 7  | 157,306,440 | 159,119,486 | 2 | 2 | 4  | 0 |
| Case 109 | 8  | 164,984     | 3,336,289   | 2 | 1 | 3  | 0 |
| Case 109 | 8  | 3,339,898   | 36,939,955  | 1 | 1 | 2  | 0 |
| Case 109 | 8  | 36,953,646  | 38,486,970  | 3 | 1 | 4  | 0 |
| Case 109 | 8  | 38,488,601  | 43,791,691  | 2 | 1 | 3  | 0 |
| Case 109 | 8  | 46,886,735  | 48,945,620  | 2 | 1 | 3  | 0 |
| Case 109 | 8  | 48,954,143  | 50,734,527  | 3 | 2 | 5  | 0 |
| Case 109 | 8  | 50,752,038  | 65,254,172  | 2 | 1 | 3  | 0 |
| Case 109 | 8  | 65,272,478  | 69,693,543  | 2 | 2 | 4  | 0 |
| Case 109 | 8  | 69,699,676  | 69,742,300  | 3 | 2 | 5  | 0 |
| Case 109 | 8  | 69,745,066  | 70,451,302  | 4 | 2 | 6  | 0 |
| Case 109 | 8  | 70,451,675  | 71,849,895  | 2 | 2 | 4  | 0 |
| Case 109 | 8  | 71,875,128  | 75,369,545  | 4 | 2 | 6  | 0 |
| Case 109 | 8  | 75,377,173  | 80,610,888  | 5 | 2 | 7  | 0 |
| Case 109 | 8  | 80,611,468  | 81,246,699  | 4 | 1 | 5  | 0 |
| Case 109 | 8  | 81,256,542  | 88,846,956  | 5 | 2 | 7  | 0 |
| Case 109 | 8  | 88,852,543  | 89,338,388  | 4 | 2 | 6  | 0 |
| Case 109 | 8  | 89,342,944  | 92,866,188  | 5 | 2 | 7  | 0 |
| Case 109 | 8  | 92,867,682  | 98,600,977  | 5 | 1 | 6  | 0 |
| Case 109 | 8  | 98,615,175  | 98,647,447  | 8 | 2 | 10 | 0 |
| Case 109 | 8  | 98,648,478  | 104,924,389 | 5 | 1 | 6  | 0 |
| Case 109 | 8  | 104,925,755 | 105,351,943 | 6 | 2 | 8  | 0 |
| Case 109 | 8  | 105,351,998 | 105,884,484 | 5 | 1 | 6  | 0 |
| Case 109 | 8  | 105,884,605 | 108,151,432 | 5 | 2 | 7  | 0 |
| Case 109 | 8  | 108,155,732 | 110,670,303 | 4 | 2 | 6  | 0 |
| Case 109 | 8  | 110,673,564 | 113,162,234 | 5 | 2 | 7  | 0 |
| Case 109 | 8  | 113,167,988 | 116,219,063 | 6 | 2 | 8  | 0 |
| Case 109 | 8  | 116,222,460 | 117,960,147 | 5 | 1 | 6  | 0 |
| Case 109 | 8  | 117,974,268 | 119,936,669 | 4 | 2 | 6  | 0 |
| Case 109 | 8  | 119,936,717 | 128,471,041 | 2 | 2 | 4  | 0 |
| Case 109 | 8  | 128,472,320 | 128,909,539 | 3 | 2 | 5  | 0 |
| Case 109 | 8  | 128,911,213 | 136,623,771 | 2 | 2 | 4  | 0 |
| Case 109 | 8  | 136,624,184 | 136,743,544 | 2 | 1 | 3  | 0 |
| Case 109 | 8  | 136,746,031 | 137,240,873 | 2 | 2 | 4  | 0 |
| Case 109 | 8  | 137,256,602 | 144,942,718 | 2 | 1 | 3  | 0 |
| Case 109 | 8  | 144,942,796 | 146,293,414 | 2 | 2 | 4  | 0 |
| Case 109 | 9  | 46,587      | 26,038,217  | 1 | 0 | 1  | 0 |
| Case 109 | 9  | 26,038,747  | 46,944,322  | 2 | 0 | 2  | 1 |
| Case 109 | 9  | 65,629,772  | 109,931,412 | 2 | 0 | 2  | 1 |
| Case 109 | 9  | 109,940,271 | 111,098,115 | 7 | 0 | 7  | 1 |
| Case 109 | 9  | 111,100,388 | 111,761,406 | 4 | 0 | 4  | 1 |
| Case 109 | 9  | 111,761,469 | 120,416,402 | 2 | 0 | 2  | 1 |
| Case 109 | 9  | 120,418,118 | 129,139,361 | 3 | 0 | 3  | 1 |
| Case 109 | 9  | 129,141,450 | 129,409,198 | 4 | 0 | 4  | 1 |
| Case 109 | 9  | 129,416,317 | 138,149,166 | 3 | 0 | 3  | 1 |
| Case 109 | 9  | 138,149,317 | 138,175,847 | 4 | 0 | 4  | 1 |
| Case 109 | 9  | 138,176,724 | 141,066,491 | 3 | 0 | 3  | 1 |
| Case 109 | 10 | 98,087      | 13,716,316  | 3 | 1 | 4  | 0 |
| Case 109 | 10 | 13,723,773  | 14,118,224  | 4 | 1 | 5  | 0 |
| Case 109 | 10 | 14,120,334  | 39,097,912  | 3 | 1 | 4  | 0 |
| Case 109 | 10 | 42,436,301  | 76,372,037  | 1 | 1 | 2  | 0 |
| Case 109 | 10 | 76,373,904  | 82,472,563  | 2 | 1 | 3  | 0 |
| Case 109 | 10 | 82,473,065  | 94,347,830  | 1 | 1 | 2  | 0 |
| Case 109 | 10 | 94,353,278  | 94,794,319  | 2 | 1 | 3  | 0 |
| Case 109 | 10 | 94,796,683  | 135,477,883 | 1 | 1 | 2  | 0 |
| Case 109 | 11 | 193,146     | 5,878,836   | 2 | 0 | 2  | 1 |
| Case 109 | 11 | 5,899,862   | 5,934,737   | 4 | 0 | 4  | 1 |
| Case 109 | 11 | 5,954,809   | 8,015,651   | 2 | 0 | 2  | 1 |
| Case 109 | 11 | 8,016,013   | 8,435,100   | 3 | 0 | 3  | 1 |

|          |    |             |             |   |   |    |   |
|----------|----|-------------|-------------|---|---|----|---|
| Case 109 | 11 | 8,437,827   | 20,782,829  | 2 | 0 | 2  | 1 |
| Case 109 | 11 | 20,784,543  | 21,014,765  | 3 | 0 | 3  | 1 |
| Case 109 | 11 | 21,016,033  | 34,434,761  | 2 | 0 | 2  | 1 |
| Case 109 | 11 | 34,436,686  | 34,778,351  | 2 | 2 | 4  | 0 |
| Case 109 | 11 | 34,796,804  | 51,591,253  | 2 | 1 | 3  | 0 |
| Case 109 | 11 | 54,794,237  | 65,416,753  | 2 | 1 | 3  | 0 |
| Case 109 | 11 | 65,416,851  | 65,596,281  | 2 | 2 | 4  | 0 |
| Case 109 | 11 | 65,613,348  | 69,514,277  | 2 | 1 | 3  | 0 |
| Case 109 | 11 | 69,515,423  | 69,543,611  | 3 | 1 | 4  | 0 |
| Case 109 | 11 | 69,544,508  | 75,964,525  | 2 | 1 | 3  | 0 |
| Case 109 | 11 | 75,966,611  | 76,026,791  | 3 | 1 | 4  | 0 |
| Case 109 | 11 | 76,027,936  | 104,789,971 | 2 | 1 | 3  | 0 |
| Case 109 | 11 | 104,809,654 | 120,400,149 | 1 | 1 | 2  | 0 |
| Case 109 | 11 | 120,400,419 | 121,420,669 | 2 | 1 | 3  | 0 |
| Case 109 | 11 | 121,420,751 | 134,934,063 | 1 | 1 | 2  | 0 |
| Case 109 | 12 | 191,619     | 24,792,818  | 2 | 0 | 2  | 1 |
| Case 109 | 12 | 24,798,175  | 25,439,364  | 7 | 1 | 8  | 0 |
| Case 109 | 12 | 25,441,609  | 25,480,547  | 9 | 1 | 10 | 0 |
| Case 109 | 12 | 25,482,128  | 25,666,033  | 6 | 1 | 7  | 0 |
| Case 109 | 12 | 25,671,066  | 25,832,829  | 4 | 2 | 6  | 0 |
| Case 109 | 12 | 25,834,871  | 28,515,383  | 2 | 2 | 4  | 0 |
| Case 109 | 12 | 28,534,415  | 31,886,971  | 2 | 1 | 3  | 0 |
| Case 109 | 12 | 31,887,137  | 33,148,078  | 2 | 0 | 2  | 1 |
| Case 109 | 12 | 33,150,520  | 34,853,011  | 2 | 1 | 3  | 0 |
| Case 109 | 12 | 37,876,400  | 37,876,400  | 2 | 1 | 3  | 0 |
| Case 109 | 12 | 37,927,114  | 54,231,159  | 2 | 0 | 2  | 1 |
| Case 109 | 12 | 54,235,961  | 54,634,666  | 3 | 0 | 3  | 1 |
| Case 109 | 12 | 54,649,941  | 56,755,952  | 2 | 0 | 2  | 1 |
| Case 109 | 12 | 56,776,586  | 58,193,685  | 2 | 2 | 4  | 0 |
| Case 109 | 12 | 58,196,095  | 63,895,154  | 3 | 2 | 5  | 0 |
| Case 109 | 12 | 63,897,387  | 65,508,788  | 2 | 2 | 4  | 0 |
| Case 109 | 12 | 65,514,266  | 115,837,861 | 2 | 0 | 2  | 1 |
| Case 109 | 12 | 115,841,509 | 116,298,613 | 3 | 0 | 3  | 1 |
| Case 109 | 12 | 116,299,468 | 122,203,680 | 2 | 0 | 2  | 1 |
| Case 109 | 12 | 122,203,915 | 122,514,975 | 3 | 0 | 3  | 1 |
| Case 109 | 12 | 122,590,228 | 133,810,935 | 2 | 0 | 2  | 1 |
| Case 109 | 13 | 19,058,717  | 30,616,134  | 3 | 0 | 3  | 1 |
| Case 109 | 13 | 30,620,530  | 30,874,175  | 4 | 0 | 4  | 1 |
| Case 109 | 13 | 30,877,359  | 82,700,330  | 3 | 0 | 3  | 1 |
| Case 109 | 13 | 82,716,886  | 85,017,085  | 1 | 0 | 1  | 0 |
| Case 109 | 13 | 85,021,473  | 85,040,002  | 2 | 0 | 2  | 1 |
| Case 109 | 13 | 85,043,838  | 95,131,385  | 3 | 0 | 3  | 1 |
| Case 109 | 13 | 95,133,816  | 95,166,661  | 4 | 0 | 4  | 1 |
| Case 109 | 13 | 95,170,689  | 115,103,529 | 3 | 0 | 3  | 1 |
| Case 109 | 14 | 19,280,733  | 107,287,663 | 2 | 1 | 3  | 0 |
| Case 109 | 15 | 20,034,919  | 48,179,897  | 2 | 0 | 2  | 1 |
| Case 109 | 15 | 48,180,935  | 48,480,491  | 1 | 0 | 1  | 0 |
| Case 109 | 15 | 48,481,665  | 102,461,162 | 2 | 0 | 2  | 1 |
| Case 109 | 16 | 88,165      | 10,880,077  | 3 | 0 | 3  | 1 |
| Case 109 | 16 | 10,886,823  | 11,337,805  | 5 | 0 | 5  | 1 |
| Case 109 | 16 | 11,340,579  | 24,366,971  | 3 | 0 | 3  | 1 |
| Case 109 | 16 | 24,368,796  | 24,384,711  | 4 | 0 | 4  | 1 |
| Case 109 | 16 | 24,390,705  | 35,285,582  | 3 | 0 | 3  | 1 |
| Case 109 | 16 | 46,450,037  | 57,820,109  | 3 | 0 | 3  | 1 |
| Case 109 | 16 | 57,822,267  | 58,105,677  | 4 | 0 | 4  | 1 |
| Case 109 | 16 | 58,111,433  | 64,216,776  | 3 | 0 | 3  | 1 |
| Case 109 | 16 | 64,221,018  | 64,877,700  | 4 | 0 | 4  | 1 |
| Case 109 | 16 | 64,883,464  | 69,481,071  | 3 | 0 | 3  | 1 |
| Case 109 | 16 | 69,496,384  | 70,154,486  | 4 | 0 | 4  | 1 |
| Case 109 | 16 | 70,166,140  | 71,458,299  | 3 | 0 | 3  | 1 |
| Case 109 | 16 | 71,458,581  | 71,800,045  | 4 | 0 | 4  | 1 |

|          |    |            |             |   |   |   |   |
|----------|----|------------|-------------|---|---|---|---|
| Case 109 | 16 | 71,803,974 | 78,784,233  | 3 | 0 | 3 | 1 |
| Case 109 | 16 | 78,787,891 | 80,788,323  | 2 | 0 | 2 | 1 |
| Case 109 | 16 | 80,791,319 | 81,061,776  | 1 | 0 | 1 | 0 |
| Case 109 | 16 | 81,061,827 | 90,274,695  | 2 | 0 | 2 | 1 |
| Case 109 | 17 | 11,885     | 4,156,620   | 2 | 0 | 2 | 1 |
| Case 109 | 17 | 4,162,965  | 5,591,389   | 3 | 0 | 3 | 1 |
| Case 109 | 17 | 5,594,285  | 6,889,557   | 4 | 0 | 4 | 1 |
| Case 109 | 17 | 6,898,897  | 7,681,492   | 3 | 0 | 3 | 1 |
| Case 109 | 17 | 7,681,731  | 18,879,649  | 2 | 0 | 2 | 1 |
| Case 109 | 17 | 18,879,761 | 18,909,043  | 3 | 0 | 3 | 1 |
| Case 109 | 17 | 18,911,386 | 22,242,355  | 2 | 0 | 2 | 1 |
| Case 109 | 17 | 25,268,142 | 25,268,142  | 2 | 0 | 2 | 1 |
| Case 109 | 17 | 25,295,032 | 35,836,990  | 2 | 2 | 4 | 0 |
| Case 109 | 17 | 35,848,255 | 36,754,504  | 3 | 2 | 5 | 0 |
| Case 109 | 17 | 36,760,366 | 43,030,679  | 2 | 2 | 4 | 0 |
| Case 109 | 17 | 43,031,392 | 43,549,526  | 4 | 1 | 5 | 0 |
| Case 109 | 17 | 43,570,226 | 49,442,178  | 2 | 0 | 2 | 1 |
| Case 109 | 17 | 49,446,154 | 50,294,398  | 3 | 0 | 3 | 1 |
| Case 109 | 17 | 50,296,779 | 57,941,166  | 2 | 0 | 2 | 1 |
| Case 109 | 17 | 57,944,072 | 63,049,718  | 2 | 1 | 3 | 0 |
| Case 109 | 17 | 63,056,780 | 63,534,538  | 2 | 2 | 4 | 0 |
| Case 109 | 17 | 63,541,497 | 74,383,648  | 2 | 1 | 3 | 0 |
| Case 109 | 17 | 74,383,678 | 78,938,498  | 3 | 1 | 4 | 0 |
| Case 109 | 17 | 78,939,414 | 80,039,509  | 4 | 1 | 5 | 0 |
| Case 109 | 17 | 80,039,510 | 81,060,040  | 2 | 2 | 4 | 0 |
| Case 109 | 18 | 87,505     | 3,359,237   | 3 | 0 | 3 | 1 |
| Case 109 | 18 | 3,363,530  | 4,009,380   | 2 | 0 | 2 | 1 |
| Case 109 | 18 | 4,014,959  | 15,375,878  | 3 | 0 | 3 | 1 |
| Case 109 | 18 | 18,520,354 | 37,981,499  | 3 | 0 | 3 | 1 |
| Case 109 | 18 | 37,984,800 | 78,015,180  | 2 | 1 | 3 | 0 |
| Case 109 | 19 | 260,912    | 9,075,021   | 2 | 0 | 2 | 1 |
| Case 109 | 19 | 9,075,321  | 9,076,992   | 3 | 0 | 3 | 1 |
| Case 109 | 19 | 9,077,071  | 24,629,285  | 2 | 0 | 2 | 1 |
| Case 109 | 19 | 27,732,159 | 27,828,664  | 2 | 0 | 2 | 1 |
| Case 109 | 19 | 27,862,694 | 47,389,370  | 3 | 0 | 3 | 1 |
| Case 109 | 19 | 47,397,495 | 49,184,380  | 2 | 0 | 2 | 1 |
| Case 109 | 19 | 49,186,717 | 49,206,359  | 0 | 0 | 0 | 0 |
| Case 109 | 19 | 49,206,417 | 54,891,185  | 2 | 0 | 2 | 1 |
| Case 109 | 19 | 54,896,877 | 54,930,361  | 1 | 0 | 1 | 0 |
| Case 109 | 19 | 54,930,392 | 59,097,160  | 2 | 0 | 2 | 1 |
| Case 109 | 20 | 63,244     | 5,695,218   | 3 | 2 | 5 | 0 |
| Case 109 | 20 | 5,696,982  | 17,467,032  | 4 | 2 | 6 | 0 |
| Case 109 | 20 | 17,472,515 | 26,293,985  | 3 | 2 | 5 | 0 |
| Case 109 | 20 | 29,425,357 | 29,834,107  | 3 | 2 | 5 | 0 |
| Case 109 | 20 | 29,843,182 | 36,604,698  | 3 | 1 | 4 | 0 |
| Case 109 | 20 | 36,610,507 | 60,065,771  | 3 | 2 | 5 | 0 |
| Case 109 | 20 | 60,080,431 | 62,948,788  | 2 | 2 | 4 | 0 |
| Case 109 | 21 | 10,827,533 | 10,971,337  | 1 | 1 | 2 | 0 |
| Case 109 | 21 | 14,368,320 | 45,860,714  | 1 | 1 | 2 | 0 |
| Case 109 | 21 | 45,860,766 | 45,953,773  | 2 | 1 | 3 | 0 |
| Case 109 | 21 | 45,957,792 | 48,100,155  | 1 | 1 | 2 | 0 |
| Case 109 | 22 | 16,114,244 | 44,652,157  | 2 | 1 | 3 | 0 |
| Case 109 | 22 | 44,656,581 | 45,795,041  | 1 | 0 | 1 | 0 |
| Case 109 | 22 | 45,802,354 | 51,195,728  | 2 | 1 | 3 | 0 |
| Case 109 | X  | 2,700,157  | 58,488,110  | 3 | 0 | 3 | 1 |
| Case 109 | X  | 61,694,576 | 154,898,561 | 3 | 0 | 3 | 1 |

<sup>1</sup>Based on the reference human genome from UCSC human genome 19 (hg19). <sup>2</sup>Copy numbers of "major allele" and "minor allele" were predicted by ASCAT (<https://www.crick.ac.uk/research/labs/peter-van-loo/software>, [Ref. 28]). <sup>3</sup>1, positive; 0, negative.

**Supplementary Table 8B.** CNAs obtained by Global Parameter Hidden Markov Model (GPHMM) based on single-nucleotide polymorphism microarray analysis of 66 cancerous tissue samples

| Patient ID | Chromosome <sup>1</sup> | Start position <sup>1</sup> | End position <sup>1</sup> | Number of A allele <sup>2</sup> | Number of B allele <sup>2</sup> | Copy number | Loss of heterozygosity <sup>3</sup> |
|------------|-------------------------|-----------------------------|---------------------------|---------------------------------|---------------------------------|-------------|-------------------------------------|
| Case 1     | 1                       | 82,154                      | 121,346,616               | 2                               | 1                               | 3           | 0                                   |
| Case 1     | 1                       | 142,649,718                 | 249,218,992               | 2                               | 1                               | 3           | 0                                   |
| Case 1     | 2                       | 18,674                      | 7,036,529                 | 2                               | 1                               | 3           | 0                                   |
| Case 1     | 2                       | 7,036,621                   | 8,530,256                 | 3                               | 1                               | 4           | 0                                   |
| Case 1     | 2                       | 8,531,810                   | 9,308,148                 | 2                               | 1                               | 3           | 0                                   |
| Case 1     | 2                       | 9,310,604                   | 9,528,536                 | 3                               | 1                               | 4           | 0                                   |
| Case 1     | 2                       | 9,528,554                   | 9,695,682                 | 2                               | 1                               | 3           | 0                                   |
| Case 1     | 2                       | 9,697,171                   | 10,050,947                | 3                               | 1                               | 4           | 0                                   |
| Case 1     | 2                       | 10,050,960                  | 10,282,446                | 2                               | 1                               | 3           | 0                                   |
| Case 1     | 2                       | 10,286,466                  | 10,408,886                | 3                               | 1                               | 4           | 0                                   |
| Case 1     | 2                       | 10,413,431                  | 10,599,845                | 2                               | 1                               | 3           | 0                                   |
| Case 1     | 2                       | 10,612,091                  | 10,693,478                | 3                               | 1                               | 4           | 0                                   |
| Case 1     | 2                       | 10,696,877                  | 11,039,291                | 2                               | 1                               | 3           | 0                                   |
| Case 1     | 2                       | 11,046,638                  | 11,292,605                | 3                               | 1                               | 4           | 0                                   |
| Case 1     | 2                       | 11,293,336                  | 11,484,142                | 2                               | 1                               | 3           | 0                                   |
| Case 1     | 2                       | 11,489,531                  | 11,798,675                | 3                               | 1                               | 4           | 0                                   |
| Case 1     | 2                       | 11,798,684                  | 12,083,477                | 2                               | 1                               | 3           | 0                                   |
| Case 1     | 2                       | 12,084,726                  | 12,221,688                | 3                               | 1                               | 4           | 0                                   |
| Case 1     | 2                       | 12,225,930                  | 12,393,033                | 2                               | 1                               | 3           | 0                                   |
| Case 1     | 2                       | 12,397,435                  | 15,415,867                | 3                               | 1                               | 4           | 0                                   |
| Case 1     | 2                       | 15,417,035                  | 15,783,051                | 2                               | 1                               | 3           | 0                                   |
| Case 1     | 2                       | 15,793,904                  | 16,585,720                | 3                               | 1                               | 4           | 0                                   |
| Case 1     | 2                       | 16,590,965                  | 16,943,302                | 2                               | 1                               | 3           | 0                                   |
| Case 1     | 2                       | 16,943,918                  | 18,758,057                | 3                               | 1                               | 4           | 0                                   |
| Case 1     | 2                       | 18,758,132                  | 35,624,746                | 2                               | 2                               | 4           | 0                                   |
| Case 1     | 2                       | 35,627,198                  | 36,003,061                | 3                               | 1                               | 4           | 0                                   |
| Case 1     | 2                       | 36,003,692                  | 40,725,639                | 2                               | 2                               | 4           | 0                                   |
| Case 1     | 2                       | 40,732,857                  | 40,743,183                | 3                               | 1                               | 4           | 0                                   |
| Case 1     | 2                       | 40,748,005                  | 40,748,005                | 2                               | 2                               | 4           | 0                                   |
| Case 1     | 2                       | 40,761,794                  | 41,051,123                | 3                               | 2                               | 5           | 0                                   |
| Case 1     | 2                       | 41,052,544                  | 56,762,887                | 2                               | 2                               | 4           | 0                                   |
| Case 1     | 2                       | 56,764,646                  | 56,764,646                | 2                               | 1                               | 3           | 0                                   |
| Case 1     | 2                       | 56,765,038                  | 56,970,732                | 2                               | 0                               | 2           | 1                                   |
| Case 1     | 2                       | 56,983,615                  | 56,988,751                | 2                               | 1                               | 3           | 0                                   |
| Case 1     | 2                       | 56,993,390                  | 57,039,250                | 3                               | 1                               | 4           | 0                                   |
| Case 1     | 2                       | 57,040,068                  | 57,399,830                | 3                               | 2                               | 5           | 0                                   |
| Case 1     | 2                       | 57,402,640                  | 92,081,640                | 2                               | 2                               | 4           | 0                                   |
| Case 1     | 2                       | 95,429,424                  | 95,700,730                | 2                               | 2                               | 4           | 0                                   |
| Case 1     | 2                       | 95,706,345                  | 96,011,531                | 2                               | 1                               | 3           | 0                                   |
| Case 1     | 2                       | 96,023,664                  | 100,899,665               | 2                               | 2                               | 4           | 0                                   |
| Case 1     | 2                       | 100,900,304                 | 101,223,405               | 2                               | 1                               | 3           | 0                                   |
| Case 1     | 2                       | 101,227,896                 | 101,578,542               | 2                               | 2                               | 4           | 0                                   |
| Case 1     | 2                       | 101,579,454                 | 101,694,009               | 2                               | 1                               | 3           | 0                                   |
| Case 1     | 2                       | 101,696,649                 | 102,774,988               | 2                               | 2                               | 4           | 0                                   |
| Case 1     | 2                       | 102,776,202                 | 102,851,671               | 2                               | 1                               | 3           | 0                                   |
| Case 1     | 2                       | 102,851,708                 | 131,100,288               | 2                               | 2                               | 4           | 0                                   |
| Case 1     | 2                       | 131,102,232                 | 243,048,760               | 2                               | 1                               | 3           | 0                                   |
| Case 1     | 3                       | 61,495                      | 60,496,302                | 1                               | 1                               | 2           | 0                                   |
| Case 1     | 3                       | 60,498,130                  | 60,546,856                | 2                               | 0                               | 2           | 1                                   |
| Case 1     | 3                       | 60,547,602                  | 60,775,460                | 1                               | 0                               | 1           | 0                                   |
| Case 1     | 3                       | 60,775,968                  | 60,780,913                | 2                               | 0                               | 2           | 1                                   |
| Case 1     | 3                       | 60,788,842                  | 68,417,939                | 1                               | 1                               | 2           | 0                                   |
| Case 1     | 3                       | 68,426,920                  | 69,121,641                | 5                               | 1                               | 6           | 0                                   |
| Case 1     | 3                       | 69,125,881                  | 75,345,050                | 1                               | 1                               | 2           | 0                                   |
| Case 1     | 3                       | 75,353,238                  | 75,428,675                | 5                               | 1                               | 6           | 0                                   |
| Case 1     | 3                       | 75,453,100                  | 76,910,718                | 1                               | 1                               | 2           | 0                                   |
| Case 1     | 3                       | 76,910,935                  | 76,917,321                | 2                               | 0                               | 2           | 1                                   |

|        |   |             |             |   |   |   |   |
|--------|---|-------------|-------------|---|---|---|---|
| Case 1 | 3 | 76,917,552  | 76,972,804  | 1 | 0 | 1 | 0 |
| Case 1 | 3 | 76,976,439  | 77,007,830  | 2 | 0 | 2 | 1 |
| Case 1 | 3 | 77,008,129  | 90,442,925  | 1 | 1 | 2 | 0 |
| Case 1 | 3 | 93,537,290  | 197,838,262 | 2 | 1 | 3 | 0 |
| Case 1 | 4 | 71,566      | 75,174      | 2 | 2 | 4 | 0 |
| Case 1 | 4 | 85,422      | 2,087,404   | 3 | 1 | 4 | 0 |
| Case 1 | 4 | 2,097,595   | 2,172,826   | 2 | 1 | 3 | 0 |
| Case 1 | 4 | 2,172,847   | 6,279,393   | 2 | 2 | 4 | 0 |
| Case 1 | 4 | 6,279,409   | 6,303,878   | 2 | 1 | 3 | 0 |
| Case 1 | 4 | 6,303,955   | 7,475,424   | 2 | 2 | 4 | 0 |
| Case 1 | 4 | 7,478,631   | 49,620,898  | 2 | 1 | 3 | 0 |
| Case 1 | 4 | 52,697,856  | 72,569,693  | 2 | 1 | 3 | 0 |
| Case 1 | 4 | 72,578,724  | 72,629,648  | 2 | 2 | 4 | 0 |
| Case 1 | 4 | 72,630,642  | 92,349,263  | 2 | 1 | 3 | 0 |
| Case 1 | 4 | 92,350,342  | 98,414,540  | 3 | 1 | 4 | 0 |
| Case 1 | 4 | 98,425,582  | 99,392,101  | 2 | 1 | 3 | 0 |
| Case 1 | 4 | 99,399,748  | 99,952,710  | 3 | 1 | 4 | 0 |
| Case 1 | 4 | 99,955,535  | 100,380,148 | 2 | 1 | 3 | 0 |
| Case 1 | 4 | 100,391,104 | 103,455,347 | 3 | 1 | 4 | 0 |
| Case 1 | 4 | 103,463,007 | 104,242,990 | 2 | 1 | 3 | 0 |
| Case 1 | 4 | 104,245,131 | 106,483,898 | 3 | 1 | 4 | 0 |
| Case 1 | 4 | 106,485,194 | 106,877,631 | 2 | 1 | 3 | 0 |
| Case 1 | 4 | 106,880,251 | 108,618,232 | 3 | 1 | 4 | 0 |
| Case 1 | 4 | 108,621,483 | 109,750,774 | 2 | 1 | 3 | 0 |
| Case 1 | 4 | 109,754,899 | 110,048,492 | 3 | 1 | 4 | 0 |
| Case 1 | 4 | 110,048,604 | 110,459,736 | 2 | 1 | 3 | 0 |
| Case 1 | 4 | 110,461,523 | 111,426,341 | 3 | 1 | 4 | 0 |
| Case 1 | 4 | 111,430,926 | 111,543,496 | 2 | 1 | 3 | 0 |
| Case 1 | 4 | 111,545,323 | 114,201,353 | 3 | 1 | 4 | 0 |
| Case 1 | 4 | 114,203,944 | 114,294,308 | 2 | 1 | 3 | 0 |
| Case 1 | 4 | 114,294,462 | 119,595,364 | 3 | 1 | 4 | 0 |
| Case 1 | 4 | 119,605,009 | 119,754,766 | 2 | 1 | 3 | 0 |
| Case 1 | 4 | 119,761,678 | 121,958,425 | 3 | 1 | 4 | 0 |
| Case 1 | 4 | 121,958,473 | 122,450,852 | 2 | 1 | 3 | 0 |
| Case 1 | 4 | 122,451,829 | 123,614,762 | 3 | 1 | 4 | 0 |
| Case 1 | 4 | 123,617,561 | 123,664,906 | 2 | 1 | 3 | 0 |
| Case 1 | 4 | 123,664,919 | 126,234,727 | 3 | 1 | 4 | 0 |
| Case 1 | 4 | 126,237,639 | 126,373,653 | 2 | 1 | 3 | 0 |
| Case 1 | 4 | 126,373,789 | 128,391,591 | 3 | 1 | 4 | 0 |
| Case 1 | 4 | 128,392,771 | 129,121,807 | 2 | 1 | 3 | 0 |
| Case 1 | 4 | 129,121,810 | 130,376,388 | 3 | 1 | 4 | 0 |
| Case 1 | 4 | 130,378,087 | 131,062,875 | 2 | 1 | 3 | 0 |
| Case 1 | 4 | 131,063,868 | 140,782,542 | 3 | 1 | 4 | 0 |
| Case 1 | 4 | 140,783,603 | 140,823,857 | 2 | 1 | 3 | 0 |
| Case 1 | 4 | 140,824,428 | 141,310,226 | 3 | 1 | 4 | 0 |
| Case 1 | 4 | 141,310,389 | 141,496,369 | 2 | 1 | 3 | 0 |
| Case 1 | 4 | 141,496,486 | 144,480,231 | 3 | 1 | 4 | 0 |
| Case 1 | 4 | 144,493,185 | 145,286,433 | 2 | 1 | 3 | 0 |
| Case 1 | 4 | 145,293,039 | 149,356,352 | 3 | 1 | 4 | 0 |
| Case 1 | 4 | 149,356,682 | 149,832,511 | 2 | 1 | 3 | 0 |
| Case 1 | 4 | 149,841,708 | 151,504,638 | 3 | 1 | 4 | 0 |
| Case 1 | 4 | 151,509,208 | 152,096,013 | 2 | 1 | 3 | 0 |
| Case 1 | 4 | 152,096,094 | 153,669,404 | 3 | 1 | 4 | 0 |
| Case 1 | 4 | 153,681,139 | 153,897,516 | 2 | 1 | 3 | 0 |
| Case 1 | 4 | 153,897,567 | 154,474,931 | 3 | 1 | 4 | 0 |
| Case 1 | 4 | 154,477,046 | 154,670,813 | 2 | 1 | 3 | 0 |
| Case 1 | 4 | 154,673,127 | 155,055,498 | 3 | 1 | 4 | 0 |
| Case 1 | 4 | 155,057,837 | 155,256,049 | 2 | 1 | 3 | 0 |
| Case 1 | 4 | 155,256,125 | 155,533,035 | 3 | 1 | 4 | 0 |
| Case 1 | 4 | 155,533,288 | 156,633,270 | 2 | 1 | 3 | 0 |
| Case 1 | 4 | 156,635,309 | 159,460,722 | 3 | 1 | 4 | 0 |



|        |   |             |             |   |   |   |   |
|--------|---|-------------|-------------|---|---|---|---|
| Case 1 | 4 | 159,464,732 | 159,640,428 | 2 | 1 | 3 | 0 |
| Case 1 | 4 | 159,642,576 | 159,866,785 | 3 | 1 | 4 | 0 |
| Case 1 | 4 | 159,873,196 | 159,940,905 | 2 | 1 | 3 | 0 |
| Case 1 | 4 | 159,943,696 | 165,214,649 | 3 | 1 | 4 | 0 |
| Case 1 | 4 | 165,221,971 | 165,962,490 | 2 | 1 | 3 | 0 |
| Case 1 | 4 | 165,964,290 | 169,336,811 | 3 | 1 | 4 | 0 |
| Case 1 | 4 | 169,337,313 | 169,505,090 | 2 | 1 | 3 | 0 |
| Case 1 | 4 | 169,506,877 | 170,848,562 | 3 | 1 | 4 | 0 |
| Case 1 | 4 | 170,857,504 | 171,152,392 | 2 | 1 | 3 | 0 |
| Case 1 | 4 | 171,163,418 | 177,006,484 | 3 | 1 | 4 | 0 |
| Case 1 | 4 | 177,014,804 | 177,761,552 | 2 | 1 | 3 | 0 |
| Case 1 | 4 | 177,767,619 | 178,337,145 | 3 | 1 | 4 | 0 |
| Case 1 | 4 | 178,340,126 | 178,762,043 | 2 | 1 | 3 | 0 |
| Case 1 | 4 | 178,770,448 | 179,929,454 | 3 | 1 | 4 | 0 |
| Case 1 | 4 | 179,932,194 | 180,337,189 | 2 | 1 | 3 | 0 |
| Case 1 | 4 | 180,339,842 | 180,652,005 | 3 | 1 | 4 | 0 |
| Case 1 | 4 | 180,652,782 | 180,916,219 | 2 | 1 | 3 | 0 |
| Case 1 | 4 | 180,917,828 | 181,598,141 | 3 | 1 | 4 | 0 |
| Case 1 | 4 | 181,600,151 | 182,181,119 | 2 | 1 | 3 | 0 |
| Case 1 | 4 | 182,182,652 | 182,733,805 | 3 | 1 | 4 | 0 |
| Case 1 | 4 | 182,740,613 | 183,299,318 | 2 | 1 | 3 | 0 |
| Case 1 | 4 | 183,301,064 | 183,591,707 | 3 | 1 | 4 | 0 |
| Case 1 | 4 | 183,593,318 | 185,023,826 | 2 | 1 | 3 | 0 |
| Case 1 | 4 | 185,024,257 | 185,549,217 | 3 | 1 | 4 | 0 |
| Case 1 | 4 | 185,550,122 | 186,112,180 | 2 | 1 | 3 | 0 |
| Case 1 | 4 | 186,112,208 | 186,313,557 | 3 | 1 | 4 | 0 |
| Case 1 | 4 | 186,316,633 | 186,456,560 | 2 | 1 | 3 | 0 |
| Case 1 | 4 | 186,459,026 | 186,746,956 | 3 | 1 | 4 | 0 |
| Case 1 | 4 | 186,747,070 | 187,656,456 | 2 | 1 | 3 | 0 |
| Case 1 | 4 | 187,661,911 | 188,646,845 | 3 | 1 | 4 | 0 |
| Case 1 | 4 | 188,648,818 | 189,942,126 | 2 | 1 | 3 | 0 |
| Case 1 | 4 | 189,949,002 | 190,137,076 | 3 | 1 | 4 | 0 |
| Case 1 | 4 | 190,146,555 | 190,883,077 | 2 | 1 | 3 | 0 |
| Case 1 | 4 | 190,903,682 | 190,963,766 | 3 | 1 | 4 | 0 |
| Case 1 | 5 | 38,139      | 1,508,837   | 3 | 0 | 3 | 1 |
| Case 1 | 5 | 1,517,198   | 5,437,380   | 4 | 0 | 4 | 1 |
| Case 1 | 5 | 5,441,314   | 5,447,607   | 6 | 0 | 6 | 1 |
| Case 1 | 5 | 5,449,333   | 5,514,031   | 3 | 0 | 3 | 1 |
| Case 1 | 5 | 5,514,517   | 46,399,093  | 4 | 0 | 4 | 1 |
| Case 1 | 5 | 49,457,282  | 52,163,091  | 1 | 0 | 1 | 0 |
| Case 1 | 5 | 52,163,920  | 52,175,899  | 2 | 0 | 2 | 1 |
| Case 1 | 5 | 52,178,056  | 52,727,875  | 1 | 0 | 1 | 0 |
| Case 1 | 5 | 52,728,629  | 52,856,572  | 2 | 0 | 2 | 1 |
| Case 1 | 5 | 52,856,797  | 53,562,303  | 1 | 0 | 1 | 0 |
| Case 1 | 5 | 53,566,211  | 53,690,669  | 2 | 0 | 2 | 1 |
| Case 1 | 5 | 53,693,147  | 53,729,982  | 1 | 0 | 1 | 0 |
| Case 1 | 5 | 53,730,029  | 53,823,285  | 2 | 0 | 2 | 1 |
| Case 1 | 5 | 53,824,374  | 55,147,418  | 1 | 0 | 1 | 0 |
| Case 1 | 5 | 55,147,452  | 55,236,367  | 2 | 0 | 2 | 1 |
| Case 1 | 5 | 55,236,374  | 55,308,631  | 1 | 0 | 1 | 0 |
| Case 1 | 5 | 55,322,895  | 55,438,851  | 2 | 0 | 2 | 1 |
| Case 1 | 5 | 55,439,718  | 55,568,487  | 1 | 0 | 1 | 0 |
| Case 1 | 5 | 55,574,191  | 55,601,889  | 2 | 0 | 2 | 1 |
| Case 1 | 5 | 55,603,036  | 55,730,683  | 1 | 0 | 1 | 0 |
| Case 1 | 5 | 55,730,742  | 56,001,363  | 2 | 0 | 2 | 1 |
| Case 1 | 5 | 56,009,012  | 56,727,379  | 1 | 0 | 1 | 0 |
| Case 1 | 5 | 56,727,958  | 56,782,006  | 2 | 0 | 2 | 1 |
| Case 1 | 5 | 56,785,096  | 60,542,486  | 1 | 0 | 1 | 0 |
| Case 1 | 5 | 60,549,110  | 60,602,684  | 2 | 0 | 2 | 1 |
| Case 1 | 5 | 60,603,462  | 60,850,467  | 1 | 0 | 1 | 0 |
| Case 1 | 5 | 60,857,714  | 61,171,312  | 2 | 0 | 2 | 1 |

|        |   |             |             |   |   |   |   |
|--------|---|-------------|-------------|---|---|---|---|
| Case 1 | 5 | 61,172,759  | 63,244,622  | 1 | 0 | 1 | 0 |
| Case 1 | 5 | 63,249,424  | 63,257,500  | 2 | 0 | 2 | 1 |
| Case 1 | 5 | 63,257,540  | 65,533,655  | 1 | 0 | 1 | 0 |
| Case 1 | 5 | 65,534,403  | 65,758,455  | 2 | 0 | 2 | 1 |
| Case 1 | 5 | 65,758,773  | 66,478,626  | 1 | 0 | 1 | 0 |
| Case 1 | 5 | 66,478,729  | 66,479,896  | 2 | 0 | 2 | 1 |
| Case 1 | 5 | 66,480,051  | 67,714,246  | 1 | 0 | 1 | 0 |
| Case 1 | 5 | 67,716,636  | 67,768,278  | 2 | 0 | 2 | 1 |
| Case 1 | 5 | 67,768,380  | 68,715,310  | 1 | 0 | 1 | 0 |
| Case 1 | 5 | 68,715,388  | 68,716,312  | 2 | 0 | 2 | 1 |
| Case 1 | 5 | 68,720,419  | 70,895,499  | 1 | 0 | 1 | 0 |
| Case 1 | 5 | 70,895,532  | 95,667,674  | 2 | 0 | 2 | 1 |
| Case 1 | 5 | 95,678,301  | 95,746,355  | 3 | 0 | 3 | 1 |
| Case 1 | 5 | 95,746,663  | 139,931,384 | 2 | 0 | 2 | 1 |
| Case 1 | 5 | 139,931,607 | 139,931,740 | 1 | 0 | 1 | 0 |
| Case 1 | 5 | 139,936,760 | 180,693,127 | 2 | 0 | 2 | 1 |
| Case 1 | 6 | 108,666     | 5,312,080   | 1 | 1 | 2 | 0 |
| Case 1 | 6 | 5,320,622   | 5,369,312   | 2 | 0 | 2 | 1 |
| Case 1 | 6 | 5,371,349   | 5,488,980   | 1 | 0 | 1 | 0 |
| Case 1 | 6 | 5,489,201   | 5,524,393   | 2 | 0 | 2 | 1 |
| Case 1 | 6 | 5,531,253   | 5,615,321   | 1 | 0 | 1 | 0 |
| Case 1 | 6 | 5,618,987   | 6,010,539   | 2 | 0 | 2 | 1 |
| Case 1 | 6 | 6,012,391   | 6,132,722   | 1 | 0 | 1 | 0 |
| Case 1 | 6 | 6,132,752   | 6,182,605   | 2 | 0 | 2 | 1 |
| Case 1 | 6 | 6,184,352   | 6,476,278   | 1 | 0 | 1 | 0 |
| Case 1 | 6 | 6,477,849   | 6,839,192   | 2 | 0 | 2 | 1 |
| Case 1 | 6 | 6,841,023   | 6,906,508   | 1 | 0 | 1 | 0 |
| Case 1 | 6 | 6,906,545   | 7,005,642   | 2 | 0 | 2 | 1 |
| Case 1 | 6 | 7,008,678   | 7,231,237   | 1 | 0 | 1 | 0 |
| Case 1 | 6 | 7,231,377   | 7,288,613   | 2 | 0 | 2 | 1 |
| Case 1 | 6 | 7,289,166   | 7,574,852   | 1 | 0 | 1 | 0 |
| Case 1 | 6 | 7,575,687   | 7,590,828   | 2 | 0 | 2 | 1 |
| Case 1 | 6 | 7,593,990   | 7,890,272   | 1 | 0 | 1 | 0 |
| Case 1 | 6 | 7,891,160   | 7,920,904   | 2 | 0 | 2 | 1 |
| Case 1 | 6 | 7,924,658   | 9,479,015   | 1 | 0 | 1 | 0 |
| Case 1 | 6 | 9,479,371   | 9,501,534   | 2 | 0 | 2 | 1 |
| Case 1 | 6 | 9,501,859   | 10,270,377  | 1 | 0 | 1 | 0 |
| Case 1 | 6 | 10,271,276  | 10,342,418  | 2 | 0 | 2 | 1 |
| Case 1 | 6 | 10,343,701  | 10,395,572  | 1 | 0 | 1 | 0 |
| Case 1 | 6 | 10,398,708  | 10,586,823  | 2 | 0 | 2 | 1 |
| Case 1 | 6 | 10,586,929  | 10,730,877  | 1 | 0 | 1 | 0 |
| Case 1 | 6 | 10,733,296  | 10,758,957  | 2 | 0 | 2 | 1 |
| Case 1 | 6 | 10,762,997  | 10,775,600  | 1 | 0 | 1 | 0 |
| Case 1 | 6 | 10,784,717  | 10,874,905  | 2 | 0 | 2 | 1 |
| Case 1 | 6 | 10,875,070  | 11,103,537  | 1 | 0 | 1 | 0 |
| Case 1 | 6 | 11,103,888  | 11,274,179  | 2 | 0 | 2 | 1 |
| Case 1 | 6 | 11,274,670  | 11,325,777  | 1 | 0 | 1 | 0 |
| Case 1 | 6 | 11,327,021  | 11,403,701  | 2 | 0 | 2 | 1 |
| Case 1 | 6 | 11,412,916  | 11,620,846  | 1 | 0 | 1 | 0 |
| Case 1 | 6 | 11,623,628  | 11,648,113  | 2 | 0 | 2 | 1 |
| Case 1 | 6 | 11,650,140  | 11,690,213  | 1 | 0 | 1 | 0 |
| Case 1 | 6 | 11,693,147  | 11,723,636  | 2 | 0 | 2 | 1 |
| Case 1 | 6 | 11,723,832  | 11,730,612  | 1 | 0 | 1 | 0 |
| Case 1 | 6 | 11,732,667  | 11,829,240  | 2 | 0 | 2 | 1 |
| Case 1 | 6 | 11,834,200  | 11,930,487  | 1 | 0 | 1 | 0 |
| Case 1 | 6 | 11,934,964  | 12,125,934  | 2 | 0 | 2 | 1 |
| Case 1 | 6 | 12,125,972  | 12,159,699  | 1 | 0 | 1 | 0 |
| Case 1 | 6 | 12,161,701  | 12,165,363  | 2 | 0 | 2 | 1 |
| Case 1 | 6 | 12,167,286  | 12,213,473  | 1 | 0 | 1 | 0 |
| Case 1 | 6 | 12,214,326  | 12,236,036  | 2 | 0 | 2 | 1 |
| Case 1 | 6 | 12,240,805  | 12,294,621  | 1 | 0 | 1 | 0 |

|        |   |            |            |   |   |   |   |
|--------|---|------------|------------|---|---|---|---|
| Case 1 | 6 | 12,295,503 | 12,340,061 | 2 | 0 | 2 | 1 |
| Case 1 | 6 | 12,341,753 | 12,401,910 | 1 | 0 | 1 | 0 |
| Case 1 | 6 | 12,403,680 | 12,429,862 | 2 | 0 | 2 | 1 |
| Case 1 | 6 | 12,437,137 | 12,558,110 | 1 | 0 | 1 | 0 |
| Case 1 | 6 | 12,558,421 | 12,614,259 | 2 | 0 | 2 | 1 |
| Case 1 | 6 | 12,616,984 | 13,196,011 | 1 | 0 | 1 | 0 |
| Case 1 | 6 | 13,196,576 | 13,343,257 | 2 | 0 | 2 | 1 |
| Case 1 | 6 | 13,343,870 | 13,436,619 | 1 | 0 | 1 | 0 |
| Case 1 | 6 | 13,441,424 | 13,587,980 | 2 | 0 | 2 | 1 |
| Case 1 | 6 | 13,588,577 | 14,040,480 | 1 | 0 | 1 | 0 |
| Case 1 | 6 | 14,044,820 | 14,147,085 | 2 | 0 | 2 | 1 |
| Case 1 | 6 | 14,149,263 | 14,355,492 | 1 | 0 | 1 | 0 |
| Case 1 | 6 | 14,358,168 | 14,541,122 | 2 | 0 | 2 | 1 |
| Case 1 | 6 | 14,545,779 | 14,618,137 | 1 | 0 | 1 | 0 |
| Case 1 | 6 | 14,621,353 | 14,887,524 | 2 | 0 | 2 | 1 |
| Case 1 | 6 | 14,894,076 | 15,408,528 | 1 | 0 | 1 | 0 |
| Case 1 | 6 | 15,410,647 | 15,546,213 | 2 | 0 | 2 | 1 |
| Case 1 | 6 | 15,547,476 | 15,986,282 | 1 | 0 | 1 | 0 |
| Case 1 | 6 | 15,987,424 | 16,019,115 | 2 | 0 | 2 | 1 |
| Case 1 | 6 | 16,025,120 | 16,237,843 | 1 | 0 | 1 | 0 |
| Case 1 | 6 | 16,246,785 | 16,362,246 | 2 | 0 | 2 | 1 |
| Case 1 | 6 | 16,362,388 | 16,921,131 | 1 | 0 | 1 | 0 |
| Case 1 | 6 | 16,921,147 | 17,102,858 | 2 | 0 | 2 | 1 |
| Case 1 | 6 | 17,103,517 | 18,441,067 | 1 | 0 | 1 | 0 |
| Case 1 | 6 | 18,441,336 | 18,779,046 | 2 | 0 | 2 | 1 |
| Case 1 | 6 | 18,781,294 | 19,992,265 | 1 | 0 | 1 | 0 |
| Case 1 | 6 | 19,996,808 | 20,213,334 | 2 | 0 | 2 | 1 |
| Case 1 | 6 | 20,226,668 | 21,212,926 | 1 | 0 | 1 | 0 |
| Case 1 | 6 | 21,213,307 | 21,234,711 | 2 | 0 | 2 | 1 |
| Case 1 | 6 | 21,236,547 | 21,347,410 | 1 | 0 | 1 | 0 |
| Case 1 | 6 | 21,350,628 | 21,420,553 | 2 | 0 | 2 | 1 |
| Case 1 | 6 | 21,427,143 | 21,701,841 | 1 | 0 | 1 | 0 |
| Case 1 | 6 | 21,710,896 | 21,913,741 | 2 | 0 | 2 | 1 |
| Case 1 | 6 | 21,921,026 | 24,100,190 | 1 | 0 | 1 | 0 |
| Case 1 | 6 | 24,101,448 | 24,147,483 | 2 | 0 | 2 | 1 |
| Case 1 | 6 | 24,147,572 | 24,412,567 | 1 | 0 | 1 | 0 |
| Case 1 | 6 | 24,413,457 | 24,454,392 | 2 | 0 | 2 | 1 |
| Case 1 | 6 | 24,456,822 | 24,554,762 | 1 | 0 | 1 | 0 |
| Case 1 | 6 | 24,556,922 | 24,588,826 | 2 | 0 | 2 | 1 |
| Case 1 | 6 | 24,588,884 | 25,325,408 | 1 | 0 | 1 | 0 |
| Case 1 | 6 | 25,327,149 | 25,346,955 | 2 | 0 | 2 | 1 |
| Case 1 | 6 | 25,347,733 | 25,488,583 | 1 | 0 | 1 | 0 |
| Case 1 | 6 | 25,488,754 | 25,519,515 | 2 | 0 | 2 | 1 |
| Case 1 | 6 | 25,520,038 | 25,589,165 | 1 | 0 | 1 | 0 |
| Case 1 | 6 | 25,590,224 | 25,606,409 | 2 | 0 | 2 | 1 |
| Case 1 | 6 | 25,606,442 | 25,699,999 | 1 | 0 | 1 | 0 |
| Case 1 | 6 | 25,701,484 | 25,732,331 | 2 | 0 | 2 | 1 |
| Case 1 | 6 | 25,736,678 | 25,770,239 | 1 | 0 | 1 | 0 |
| Case 1 | 6 | 25,770,505 | 25,781,139 | 2 | 0 | 2 | 1 |
| Case 1 | 6 | 25,783,315 | 25,953,684 | 1 | 0 | 1 | 0 |
| Case 1 | 6 | 25,956,501 | 26,027,306 | 2 | 0 | 2 | 1 |
| Case 1 | 6 | 26,027,380 | 26,087,736 | 1 | 0 | 1 | 0 |
| Case 1 | 6 | 26,088,890 | 26,104,448 | 2 | 0 | 2 | 1 |
| Case 1 | 6 | 26,106,237 | 26,373,740 | 1 | 0 | 1 | 0 |
| Case 1 | 6 | 26,374,410 | 26,452,619 | 2 | 0 | 2 | 1 |
| Case 1 | 6 | 26,453,642 | 26,456,069 | 1 | 0 | 1 | 0 |
| Case 1 | 6 | 26,456,443 | 26,469,445 | 2 | 0 | 2 | 1 |
| Case 1 | 6 | 26,469,866 | 26,662,626 | 1 | 0 | 1 | 0 |
| Case 1 | 6 | 26,663,478 | 26,915,342 | 2 | 0 | 2 | 1 |
| Case 1 | 6 | 26,922,906 | 27,108,811 | 1 | 0 | 1 | 0 |
| Case 1 | 6 | 27,113,540 | 27,152,008 | 2 | 0 | 2 | 1 |

|        |   |             |             |   |   |   |   |
|--------|---|-------------|-------------|---|---|---|---|
| Case 1 | 6 | 27,153,829  | 28,568,528  | 1 | 0 | 1 | 0 |
| Case 1 | 6 | 28,569,949  | 28,663,716  | 2 | 0 | 2 | 1 |
| Case 1 | 6 | 28,664,631  | 28,687,542  | 1 | 0 | 1 | 0 |
| Case 1 | 6 | 28,688,921  | 28,711,334  | 2 | 0 | 2 | 1 |
| Case 1 | 6 | 28,712,663  | 28,857,269  | 1 | 0 | 1 | 0 |
| Case 1 | 6 | 28,858,850  | 28,863,483  | 2 | 0 | 2 | 1 |
| Case 1 | 6 | 28,864,849  | 28,904,162  | 1 | 1 | 2 | 0 |
| Case 1 | 6 | 28,905,791  | 29,017,101  | 2 | 1 | 3 | 0 |
| Case 1 | 6 | 29,021,017  | 29,031,142  | 2 | 0 | 2 | 1 |
| Case 1 | 6 | 29,033,053  | 32,341,473  | 1 | 1 | 2 | 0 |
| Case 1 | 6 | 32,341,719  | 32,369,488  | 2 | 0 | 2 | 1 |
| Case 1 | 6 | 32,369,562  | 39,987,315  | 1 | 1 | 2 | 0 |
| Case 1 | 6 | 39,999,149  | 39,999,149  | 2 | 1 | 3 | 0 |
| Case 1 | 6 | 40,008,465  | 40,008,561  | 2 | 2 | 4 | 0 |
| Case 1 | 6 | 40,019,311  | 40,310,573  | 4 | 0 | 4 | 1 |
| Case 1 | 6 | 40,310,958  | 41,293,326  | 6 | 0 | 6 | 1 |
| Case 1 | 6 | 41,296,090  | 42,240,369  | 5 | 0 | 5 | 1 |
| Case 1 | 6 | 42,244,630  | 42,978,326  | 6 | 0 | 6 | 1 |
| Case 1 | 6 | 42,978,622  | 42,978,622  | 3 | 0 | 3 | 1 |
| Case 1 | 6 | 42,980,218  | 42,980,896  | 4 | 0 | 4 | 1 |
| Case 1 | 6 | 42,981,032  | 44,278,885  | 5 | 0 | 5 | 1 |
| Case 1 | 6 | 44,279,111  | 44,621,993  | 6 | 0 | 6 | 1 |
| Case 1 | 6 | 44,622,298  | 44,622,298  | 3 | 0 | 3 | 1 |
| Case 1 | 6 | 44,627,544  | 44,627,544  | 4 | 0 | 4 | 1 |
| Case 1 | 6 | 44,628,216  | 44,655,191  | 5 | 0 | 5 | 1 |
| Case 1 | 6 | 44,659,586  | 45,468,074  | 6 | 1 | 7 | 0 |
| Case 1 | 6 | 45,480,010  | 46,656,191  | 4 | 1 | 5 | 0 |
| Case 1 | 6 | 46,656,298  | 50,995,076  | 3 | 1 | 4 | 0 |
| Case 1 | 6 | 50,997,085  | 58,752,089  | 2 | 1 | 3 | 0 |
| Case 1 | 6 | 61,891,118  | 162,864,839 | 2 | 1 | 3 | 0 |
| Case 1 | 6 | 162,866,295 | 162,874,140 | 2 | 0 | 2 | 1 |
| Case 1 | 6 | 162,875,706 | 162,927,803 | 1 | 1 | 2 | 0 |
| Case 1 | 6 | 162,928,898 | 170,980,171 | 2 | 1 | 3 | 0 |
| Case 1 | 7 | 44,935      | 68,920      | 2 | 0 | 2 | 1 |
| Case 1 | 7 | 83,185      | 2,715,373   | 2 | 1 | 3 | 0 |
| Case 1 | 7 | 2,724,098   | 2,771,003   | 3 | 1 | 4 | 0 |
| Case 1 | 7 | 2,771,120   | 6,870,917   | 2 | 1 | 3 | 0 |
| Case 1 | 7 | 6,871,412   | 11,016,840  | 3 | 1 | 4 | 0 |
| Case 1 | 7 | 11,022,095  | 11,607,706  | 2 | 2 | 4 | 0 |
| Case 1 | 7 | 11,610,954  | 21,818,704  | 3 | 1 | 4 | 0 |
| Case 1 | 7 | 21,818,707  | 21,858,215  | 2 | 1 | 3 | 0 |
| Case 1 | 7 | 21,859,664  | 23,163,416  | 3 | 1 | 4 | 0 |
| Case 1 | 7 | 23,164,701  | 23,561,416  | 2 | 1 | 3 | 0 |
| Case 1 | 7 | 23,564,767  | 27,111,195  | 3 | 1 | 4 | 0 |
| Case 1 | 7 | 27,118,974  | 27,238,913  | 2 | 1 | 3 | 0 |
| Case 1 | 7 | 27,239,064  | 30,252,637  | 3 | 1 | 4 | 0 |
| Case 1 | 7 | 30,255,901  | 30,541,032  | 2 | 1 | 3 | 0 |
| Case 1 | 7 | 30,544,360  | 30,878,900  | 3 | 1 | 4 | 0 |
| Case 1 | 7 | 30,878,916  | 31,730,800  | 2 | 1 | 3 | 0 |
| Case 1 | 7 | 31,732,084  | 34,873,788  | 3 | 1 | 4 | 0 |
| Case 1 | 7 | 34,874,038  | 35,277,426  | 2 | 1 | 3 | 0 |
| Case 1 | 7 | 35,278,424  | 36,763,560  | 3 | 1 | 4 | 0 |
| Case 1 | 7 | 36,763,657  | 37,436,854  | 2 | 1 | 3 | 0 |
| Case 1 | 7 | 37,436,929  | 37,689,170  | 3 | 1 | 4 | 0 |
| Case 1 | 7 | 37,689,851  | 40,158,527  | 2 | 2 | 4 | 0 |
| Case 1 | 7 | 40,162,586  | 42,209,334  | 3 | 1 | 4 | 0 |
| Case 1 | 7 | 42,210,825  | 42,456,634  | 2 | 1 | 3 | 0 |
| Case 1 | 7 | 42,461,966  | 43,201,742  | 3 | 1 | 4 | 0 |
| Case 1 | 7 | 43,202,662  | 43,781,905  | 2 | 1 | 3 | 0 |
| Case 1 | 7 | 43,785,091  | 45,143,892  | 2 | 2 | 4 | 0 |
| Case 1 | 7 | 45,145,332  | 46,006,544  | 2 | 1 | 3 | 0 |

|        |   |             |             |   |   |   |   |
|--------|---|-------------|-------------|---|---|---|---|
| Case 1 | 7 | 46,007,868  | 47,789,918  | 3 | 1 | 4 | 0 |
| Case 1 | 7 | 47,790,912  | 48,313,003  | 2 | 1 | 3 | 0 |
| Case 1 | 7 | 48,313,084  | 50,438,720  | 3 | 1 | 4 | 0 |
| Case 1 | 7 | 50,442,726  | 50,514,670  | 2 | 1 | 3 | 0 |
| Case 1 | 7 | 50,514,693  | 51,053,326  | 3 | 1 | 4 | 0 |
| Case 1 | 7 | 51,057,161  | 51,152,961  | 2 | 1 | 3 | 0 |
| Case 1 | 7 | 51,156,296  | 58,019,061  | 2 | 2 | 4 | 0 |
| Case 1 | 7 | 61,056,053  | 63,778,717  | 2 | 2 | 4 | 0 |
| Case 1 | 7 | 63,791,269  | 63,899,114  | 2 | 1 | 3 | 0 |
| Case 1 | 7 | 63,910,447  | 79,136,577  | 2 | 2 | 4 | 0 |
| Case 1 | 7 | 79,139,403  | 98,790,650  | 4 | 0 | 4 | 1 |
| Case 1 | 7 | 98,790,669  | 99,725,631  | 6 | 0 | 6 | 1 |
| Case 1 | 7 | 99,725,875  | 128,307,573 | 3 | 0 | 3 | 1 |
| Case 1 | 7 | 128,308,813 | 128,515,846 | 4 | 0 | 4 | 1 |
| Case 1 | 7 | 128,516,945 | 128,516,945 | 6 | 0 | 6 | 1 |
| Case 1 | 7 | 128,517,183 | 129,441,536 | 3 | 0 | 3 | 1 |
| Case 1 | 7 | 129,444,951 | 135,612,517 | 4 | 0 | 4 | 1 |
| Case 1 | 7 | 135,613,116 | 137,104,148 | 5 | 0 | 5 | 1 |
| Case 1 | 7 | 137,117,163 | 137,117,163 | 3 | 1 | 4 | 0 |
| Case 1 | 7 | 137,117,796 | 137,131,588 | 5 | 0 | 5 | 1 |
| Case 1 | 7 | 137,132,243 | 137,151,096 | 3 | 1 | 4 | 0 |
| Case 1 | 7 | 137,156,237 | 137,213,552 | 2 | 2 | 4 | 0 |
| Case 1 | 7 | 137,215,159 | 138,669,367 | 4 | 0 | 4 | 1 |
| Case 1 | 7 | 138,673,567 | 138,987,711 | 6 | 0 | 6 | 1 |
| Case 1 | 7 | 138,997,907 | 139,007,755 | 3 | 0 | 3 | 1 |
| Case 1 | 7 | 139,025,094 | 139,546,615 | 4 | 0 | 4 | 1 |
| Case 1 | 7 | 139,546,643 | 140,301,990 | 6 | 0 | 6 | 1 |
| Case 1 | 7 | 140,316,236 | 141,101,902 | 7 | 0 | 7 | 1 |
| Case 1 | 7 | 141,106,552 | 142,274,257 | 2 | 0 | 2 | 1 |
| Case 1 | 7 | 142,275,743 | 142,492,130 | 3 | 0 | 3 | 1 |
| Case 1 | 7 | 142,493,129 | 159,119,486 | 2 | 0 | 2 | 1 |
| Case 1 | 8 | 164,984     | 9,775,516   | 1 | 1 | 2 | 0 |
| Case 1 | 8 | 9,781,492   | 10,755,724  | 5 | 0 | 5 | 1 |
| Case 1 | 8 | 10,755,749  | 13,832,286  | 3 | 1 | 4 | 0 |
| Case 1 | 8 | 13,834,371  | 13,924,510  | 3 | 2 | 5 | 0 |
| Case 1 | 8 | 13,925,268  | 13,937,395  | 2 | 2 | 4 | 0 |
| Case 1 | 8 | 13,938,197  | 19,037,928  | 2 | 1 | 3 | 0 |
| Case 1 | 8 | 19,039,163  | 19,039,163  | 2 | 0 | 2 | 1 |
| Case 1 | 8 | 19,039,642  | 19,171,316  | 1 | 1 | 2 | 0 |
| Case 1 | 8 | 19,174,166  | 43,791,691  | 2 | 1 | 3 | 0 |
| Case 1 | 8 | 46,886,735  | 99,115,082  | 2 | 1 | 3 | 0 |
| Case 1 | 8 | 99,115,359  | 101,629,875 | 2 | 2 | 4 | 0 |
| Case 1 | 8 | 101,637,840 | 101,803,629 | 2 | 1 | 3 | 0 |
| Case 1 | 8 | 101,806,147 | 104,333,838 | 2 | 2 | 4 | 0 |
| Case 1 | 8 | 104,335,413 | 105,361,697 | 2 | 1 | 3 | 0 |
| Case 1 | 8 | 105,361,724 | 110,305,674 | 2 | 2 | 4 | 0 |
| Case 1 | 8 | 110,308,630 | 110,530,479 | 2 | 1 | 3 | 0 |
| Case 1 | 8 | 110,530,525 | 124,085,043 | 2 | 2 | 4 | 0 |
| Case 1 | 8 | 124,089,380 | 124,518,796 | 2 | 1 | 3 | 0 |
| Case 1 | 8 | 124,520,424 | 125,031,615 | 2 | 2 | 4 | 0 |
| Case 1 | 8 | 125,032,732 | 125,131,899 | 2 | 1 | 3 | 0 |
| Case 1 | 8 | 125,132,008 | 125,457,705 | 2 | 2 | 4 | 0 |
| Case 1 | 8 | 125,459,719 | 125,628,685 | 2 | 1 | 3 | 0 |
| Case 1 | 8 | 125,628,928 | 129,534,673 | 2 | 2 | 4 | 0 |
| Case 1 | 8 | 129,541,377 | 130,219,805 | 2 | 1 | 3 | 0 |
| Case 1 | 8 | 130,224,721 | 133,141,960 | 2 | 2 | 4 | 0 |
| Case 1 | 8 | 133,141,982 | 133,423,607 | 2 | 1 | 3 | 0 |
| Case 1 | 8 | 133,424,083 | 133,690,193 | 2 | 2 | 4 | 0 |
| Case 1 | 8 | 133,698,781 | 134,093,274 | 2 | 1 | 3 | 0 |
| Case 1 | 8 | 134,094,976 | 135,409,616 | 2 | 2 | 4 | 0 |
| Case 1 | 8 | 135,412,090 | 135,793,900 | 2 | 1 | 3 | 0 |

|        |    |             |             |   |   |   |   |
|--------|----|-------------|-------------|---|---|---|---|
| Case 1 | 8  | 135,794,496 | 138,020,661 | 2 | 2 | 4 | 0 |
| Case 1 | 8  | 138,040,724 | 138,372,696 | 2 | 1 | 3 | 0 |
| Case 1 | 8  | 138,376,355 | 138,905,296 | 2 | 2 | 4 | 0 |
| Case 1 | 8  | 138,907,456 | 139,237,014 | 2 | 1 | 3 | 0 |
| Case 1 | 8  | 139,240,445 | 139,686,706 | 2 | 2 | 4 | 0 |
| Case 1 | 8  | 139,686,742 | 139,856,384 | 2 | 1 | 3 | 0 |
| Case 1 | 8  | 139,859,313 | 140,232,935 | 2 | 2 | 4 | 0 |
| Case 1 | 8  | 140,234,888 | 140,308,182 | 2 | 1 | 3 | 0 |
| Case 1 | 8  | 140,309,909 | 140,590,599 | 2 | 2 | 4 | 0 |
| Case 1 | 8  | 140,590,707 | 140,786,172 | 2 | 1 | 3 | 0 |
| Case 1 | 8  | 140,788,299 | 140,857,481 | 2 | 2 | 4 | 0 |
| Case 1 | 8  | 140,862,119 | 141,274,104 | 2 | 1 | 3 | 0 |
| Case 1 | 8  | 141,275,157 | 142,221,680 | 2 | 2 | 4 | 0 |
| Case 1 | 8  | 142,221,746 | 142,238,331 | 2 | 1 | 3 | 0 |
| Case 1 | 8  | 142,239,210 | 142,367,024 | 2 | 2 | 4 | 0 |
| Case 1 | 8  | 142,367,078 | 142,565,478 | 2 | 1 | 3 | 0 |
| Case 1 | 8  | 142,566,426 | 143,038,945 | 2 | 2 | 4 | 0 |
| Case 1 | 8  | 143,042,604 | 146,293,414 | 2 | 1 | 3 | 0 |
| Case 1 | 9  | 46,587      | 43,314,125  | 2 | 0 | 2 | 1 |
| Case 1 | 9  | 43,504,854  | 46,944,322  | 3 | 0 | 3 | 1 |
| Case 1 | 9  | 65,629,772  | 141,066,491 | 3 | 0 | 3 | 1 |
| Case 1 | 10 | 98,087      | 548,917     | 2 | 1 | 3 | 0 |
| Case 1 | 10 | 552,355     | 858,033     | 2 | 2 | 4 | 0 |
| Case 1 | 10 | 858,394     | 1,657,184   | 2 | 1 | 3 | 0 |
| Case 1 | 10 | 1,661,213   | 1,868,349   | 2 | 2 | 4 | 0 |
| Case 1 | 10 | 1,870,359   | 1,934,824   | 2 | 1 | 3 | 0 |
| Case 1 | 10 | 1,942,800   | 2,530,583   | 2 | 2 | 4 | 0 |
| Case 1 | 10 | 2,532,247   | 2,978,321   | 2 | 1 | 3 | 0 |
| Case 1 | 10 | 2,979,537   | 3,031,753   | 2 | 2 | 4 | 0 |
| Case 1 | 10 | 3,040,889   | 3,330,360   | 2 | 1 | 3 | 0 |
| Case 1 | 10 | 3,330,587   | 3,771,779   | 2 | 2 | 4 | 0 |
| Case 1 | 10 | 3,772,249   | 3,869,098   | 2 | 1 | 3 | 0 |
| Case 1 | 10 | 3,872,876   | 4,061,039   | 2 | 2 | 4 | 0 |
| Case 1 | 10 | 4,062,327   | 4,168,660   | 2 | 1 | 3 | 0 |
| Case 1 | 10 | 4,169,040   | 4,526,742   | 2 | 2 | 4 | 0 |
| Case 1 | 10 | 4,527,027   | 4,725,340   | 2 | 1 | 3 | 0 |
| Case 1 | 10 | 4,728,091   | 5,130,610   | 2 | 2 | 4 | 0 |
| Case 1 | 10 | 5,134,416   | 5,517,065   | 2 | 1 | 3 | 0 |
| Case 1 | 10 | 5,522,332   | 5,681,783   | 2 | 2 | 4 | 0 |
| Case 1 | 10 | 5,682,068   | 6,308,484   | 2 | 1 | 3 | 0 |
| Case 1 | 10 | 6,309,175   | 6,534,592   | 2 | 2 | 4 | 0 |
| Case 1 | 10 | 6,536,552   | 39,097,912  | 2 | 1 | 3 | 0 |
| Case 1 | 10 | 42,436,301  | 72,292,441  | 2 | 1 | 3 | 0 |
| Case 1 | 10 | 72,293,702  | 72,324,165  | 2 | 0 | 2 | 1 |
| Case 1 | 10 | 72,326,344  | 72,511,639  | 3 | 0 | 3 | 1 |
| Case 1 | 10 | 72,511,876  | 72,518,075  | 2 | 0 | 2 | 1 |
| Case 1 | 10 | 72,518,536  | 77,081,848  | 2 | 1 | 3 | 0 |
| Case 1 | 10 | 77,105,739  | 77,250,488  | 2 | 0 | 2 | 1 |
| Case 1 | 10 | 77,255,355  | 91,465,167  | 2 | 1 | 3 | 0 |
| Case 1 | 10 | 91,468,925  | 91,512,410  | 2 | 0 | 2 | 1 |
| Case 1 | 10 | 91,514,423  | 133,963,537 | 2 | 1 | 3 | 0 |
| Case 1 | 10 | 133,966,434 | 133,967,324 | 2 | 0 | 2 | 1 |
| Case 1 | 10 | 133,970,443 | 135,215,032 | 1 | 1 | 2 | 0 |
| Case 1 | 10 | 135,215,667 | 135,477,883 | 2 | 1 | 3 | 0 |
| Case 1 | 11 | 193,146     | 4,613,366   | 2 | 0 | 2 | 1 |
| Case 1 | 11 | 4,615,767   | 4,661,285   | 3 | 0 | 3 | 1 |
| Case 1 | 11 | 4,661,298   | 15,596,416  | 2 | 0 | 2 | 1 |
| Case 1 | 11 | 15,601,040  | 15,799,460  | 3 | 0 | 3 | 1 |
| Case 1 | 11 | 15,801,938  | 17,415,261  | 2 | 0 | 2 | 1 |
| Case 1 | 11 | 17,415,289  | 17,434,994  | 3 | 0 | 3 | 1 |
| Case 1 | 11 | 17,435,214  | 19,349,935  | 2 | 0 | 2 | 1 |

|        |    |             |             |   |   |   |   |
|--------|----|-------------|-------------|---|---|---|---|
| Case 1 | 11 | 19,350,262  | 19,541,784  | 3 | 0 | 3 | 1 |
| Case 1 | 11 | 19,546,471  | 48,181,601  | 2 | 0 | 2 | 1 |
| Case 1 | 11 | 48,182,237  | 48,328,121  | 3 | 0 | 3 | 1 |
| Case 1 | 11 | 48,328,174  | 50,697,498  | 2 | 0 | 2 | 1 |
| Case 1 | 11 | 51,095,992  | 51,591,253  | 2 | 1 | 3 | 0 |
| Case 1 | 11 | 54,794,237  | 68,506,246  | 2 | 1 | 3 | 0 |
| Case 1 | 11 | 68,509,835  | 68,660,364  | 3 | 1 | 4 | 0 |
| Case 1 | 11 | 68,660,393  | 104,532,836 | 2 | 1 | 3 | 0 |
| Case 1 | 11 | 104,537,299 | 105,168,942 | 2 | 0 | 2 | 1 |
| Case 1 | 11 | 105,200,258 | 113,313,389 | 2 | 1 | 3 | 0 |
| Case 1 | 11 | 113,316,236 | 114,115,641 | 5 | 1 | 6 | 0 |
| Case 1 | 11 | 114,117,921 | 134,934,063 | 2 | 0 | 2 | 1 |
| Case 1 | 12 | 191,619     | 2,938,082   | 2 | 1 | 3 | 0 |
| Case 1 | 12 | 2,940,015   | 3,109,873   | 2 | 0 | 2 | 1 |
| Case 1 | 12 | 3,112,378   | 3,429,915   | 2 | 1 | 3 | 0 |
| Case 1 | 12 | 3,430,368   | 4,830,000   | 2 | 0 | 2 | 1 |
| Case 1 | 12 | 4,835,882   | 7,953,089   | 2 | 1 | 3 | 0 |
| Case 1 | 12 | 7,954,051   | 8,018,538   | 2 | 0 | 2 | 1 |
| Case 1 | 12 | 8,023,500   | 8,290,881   | 2 | 1 | 3 | 0 |
| Case 1 | 12 | 8,291,122   | 8,709,213   | 2 | 0 | 2 | 1 |
| Case 1 | 12 | 8,712,420   | 9,863,968   | 2 | 1 | 3 | 0 |
| Case 1 | 12 | 9,869,271   | 10,251,445  | 2 | 0 | 2 | 1 |
| Case 1 | 12 | 10,262,275  | 12,126,594  | 2 | 1 | 3 | 0 |
| Case 1 | 12 | 12,127,785  | 14,809,278  | 2 | 0 | 2 | 1 |
| Case 1 | 12 | 14,813,981  | 18,822,242  | 2 | 1 | 3 | 0 |
| Case 1 | 12 | 18,827,044  | 18,889,271  | 2 | 0 | 2 | 1 |
| Case 1 | 12 | 18,890,787  | 20,755,626  | 2 | 1 | 3 | 0 |
| Case 1 | 12 | 20,755,963  | 21,011,481  | 2 | 0 | 2 | 1 |
| Case 1 | 12 | 21,011,581  | 21,039,974  | 2 | 1 | 3 | 0 |
| Case 1 | 12 | 21,041,634  | 21,466,232  | 2 | 0 | 2 | 1 |
| Case 1 | 12 | 21,466,267  | 21,508,178  | 2 | 1 | 3 | 0 |
| Case 1 | 12 | 21,508,230  | 21,630,795  | 2 | 0 | 2 | 1 |
| Case 1 | 12 | 21,631,934  | 23,896,612  | 2 | 1 | 3 | 0 |
| Case 1 | 12 | 23,904,029  | 24,394,579  | 2 | 0 | 2 | 1 |
| Case 1 | 12 | 24,397,180  | 28,311,347  | 2 | 1 | 3 | 0 |
| Case 1 | 12 | 28,312,593  | 28,574,825  | 2 | 0 | 2 | 1 |
| Case 1 | 12 | 28,582,580  | 29,647,030  | 2 | 1 | 3 | 0 |
| Case 1 | 12 | 29,648,191  | 29,665,037  | 2 | 0 | 2 | 1 |
| Case 1 | 12 | 29,666,890  | 30,154,165  | 2 | 1 | 3 | 0 |
| Case 1 | 12 | 30,157,592  | 30,243,631  | 2 | 0 | 2 | 1 |
| Case 1 | 12 | 30,244,780  | 30,784,107  | 2 | 1 | 3 | 0 |
| Case 1 | 12 | 30,784,840  | 30,886,435  | 2 | 0 | 2 | 1 |
| Case 1 | 12 | 30,887,977  | 33,870,297  | 2 | 1 | 3 | 0 |
| Case 1 | 12 | 33,901,640  | 34,117,408  | 2 | 0 | 2 | 1 |
| Case 1 | 12 | 34,118,992  | 34,853,011  | 2 | 1 | 3 | 0 |
| Case 1 | 12 | 37,876,400  | 43,846,199  | 2 | 1 | 3 | 0 |
| Case 1 | 12 | 43,846,407  | 133,810,935 | 2 | 0 | 2 | 1 |
| Case 1 | 13 | 19,058,717  | 114,110,407 | 3 | 0 | 3 | 1 |
| Case 1 | 13 | 114,110,660 | 114,152,694 | 2 | 0 | 2 | 1 |
| Case 1 | 13 | 114,152,730 | 115,103,529 | 3 | 0 | 3 | 1 |
| Case 1 | 14 | 19,280,733  | 22,497,625  | 3 | 0 | 3 | 1 |
| Case 1 | 14 | 22,498,019  | 22,959,592  | 4 | 0 | 4 | 1 |
| Case 1 | 14 | 22,961,102  | 22,961,102  | 6 | 0 | 6 | 1 |
| Case 1 | 14 | 22,963,646  | 54,574,131  | 3 | 0 | 3 | 1 |
| Case 1 | 14 | 54,586,618  | 55,089,882  | 2 | 0 | 2 | 1 |
| Case 1 | 14 | 55,092,680  | 55,245,149  | 3 | 0 | 3 | 1 |
| Case 1 | 14 | 55,247,874  | 67,878,125  | 2 | 0 | 2 | 1 |
| Case 1 | 14 | 67,878,384  | 67,997,223  | 3 | 0 | 3 | 1 |
| Case 1 | 14 | 68,019,608  | 69,136,881  | 2 | 0 | 2 | 1 |
| Case 1 | 14 | 69,138,371  | 69,310,512  | 3 | 0 | 3 | 1 |
| Case 1 | 14 | 69,311,842  | 75,699,438  | 2 | 0 | 2 | 1 |

|        |    |            |             |   |   |   |   |
|--------|----|------------|-------------|---|---|---|---|
| Case 1 | 14 | 75,701,390 | 75,989,286  | 3 | 0 | 3 | 1 |
| Case 1 | 14 | 75,998,984 | 107,287,663 | 2 | 0 | 2 | 1 |
| Case 1 | 15 | 20,034,919 | 34,671,124  | 2 | 1 | 3 | 0 |
| Case 1 | 15 | 34,718,594 | 34,800,595  | 2 | 0 | 2 | 1 |
| Case 1 | 15 | 34,871,296 | 102,461,162 | 2 | 1 | 3 | 0 |
| Case 1 | 16 | 88,165     | 4,193,457   | 2 | 1 | 3 | 0 |
| Case 1 | 16 | 4,194,688  | 4,359,421   | 2 | 2 | 4 | 0 |
| Case 1 | 16 | 4,367,730  | 5,758,532   | 2 | 1 | 3 | 0 |
| Case 1 | 16 | 5,762,949  | 6,089,495   | 2 | 2 | 4 | 0 |
| Case 1 | 16 | 6,091,028  | 6,203,979   | 2 | 1 | 3 | 0 |
| Case 1 | 16 | 6,204,533  | 6,581,321   | 2 | 2 | 4 | 0 |
| Case 1 | 16 | 6,581,335  | 6,767,300   | 2 | 1 | 3 | 0 |
| Case 1 | 16 | 6,768,998  | 7,158,554   | 2 | 2 | 4 | 0 |
| Case 1 | 16 | 7,158,726  | 7,415,301   | 2 | 1 | 3 | 0 |
| Case 1 | 16 | 7,415,552  | 7,607,112   | 2 | 2 | 4 | 0 |
| Case 1 | 16 | 7,609,912  | 7,735,033   | 2 | 1 | 3 | 0 |
| Case 1 | 16 | 7,735,550  | 7,797,809   | 2 | 2 | 4 | 0 |
| Case 1 | 16 | 7,798,240  | 7,872,439   | 2 | 1 | 3 | 0 |
| Case 1 | 16 | 7,873,934  | 8,876,620   | 2 | 2 | 4 | 0 |
| Case 1 | 16 | 8,876,692  | 8,952,321   | 2 | 1 | 3 | 0 |
| Case 1 | 16 | 8,952,524  | 9,661,713   | 2 | 2 | 4 | 0 |
| Case 1 | 16 | 9,668,433  | 9,795,582   | 2 | 1 | 3 | 0 |
| Case 1 | 16 | 9,797,639  | 10,161,226  | 2 | 2 | 4 | 0 |
| Case 1 | 16 | 10,163,445 | 10,220,961  | 2 | 1 | 3 | 0 |
| Case 1 | 16 | 10,221,351 | 10,453,397  | 2 | 2 | 4 | 0 |
| Case 1 | 16 | 10,454,270 | 11,477,341  | 2 | 1 | 3 | 0 |
| Case 1 | 16 | 11,477,757 | 11,769,948  | 2 | 2 | 4 | 0 |
| Case 1 | 16 | 11,770,178 | 12,533,749  | 2 | 1 | 3 | 0 |
| Case 1 | 16 | 12,536,294 | 12,798,661  | 2 | 2 | 4 | 0 |
| Case 1 | 16 | 12,798,724 | 12,926,166  | 2 | 1 | 3 | 0 |
| Case 1 | 16 | 12,932,528 | 14,274,366  | 2 | 2 | 4 | 0 |
| Case 1 | 16 | 14,275,720 | 15,847,292  | 2 | 1 | 3 | 0 |
| Case 1 | 16 | 15,850,204 | 16,126,764  | 2 | 2 | 4 | 0 |
| Case 1 | 16 | 16,127,504 | 16,910,133  | 2 | 1 | 3 | 0 |
| Case 1 | 16 | 16,910,953 | 17,200,425  | 2 | 2 | 4 | 0 |
| Case 1 | 16 | 17,200,673 | 17,532,404  | 2 | 1 | 3 | 0 |
| Case 1 | 16 | 17,536,505 | 18,224,820  | 2 | 2 | 4 | 0 |
| Case 1 | 16 | 18,237,209 | 19,095,374  | 2 | 1 | 3 | 0 |
| Case 1 | 16 | 19,109,992 | 19,619,446  | 2 | 2 | 4 | 0 |
| Case 1 | 16 | 19,620,343 | 19,838,349  | 2 | 1 | 3 | 0 |
| Case 1 | 16 | 19,842,735 | 20,043,227  | 2 | 2 | 4 | 0 |
| Case 1 | 16 | 20,043,236 | 20,693,738  | 2 | 1 | 3 | 0 |
| Case 1 | 16 | 20,694,965 | 20,952,098  | 2 | 2 | 4 | 0 |
| Case 1 | 16 | 20,952,796 | 21,170,726  | 2 | 1 | 3 | 0 |
| Case 1 | 16 | 21,171,873 | 21,260,162  | 2 | 2 | 4 | 0 |
| Case 1 | 16 | 21,261,309 | 26,507,054  | 2 | 1 | 3 | 0 |
| Case 1 | 16 | 26,507,611 | 26,961,257  | 2 | 2 | 4 | 0 |
| Case 1 | 16 | 26,962,077 | 27,142,616  | 2 | 1 | 3 | 0 |
| Case 1 | 16 | 27,145,134 | 27,245,152  | 2 | 2 | 4 | 0 |
| Case 1 | 16 | 27,245,549 | 28,195,711  | 2 | 1 | 3 | 0 |
| Case 1 | 16 | 28,203,272 | 28,338,263  | 2 | 2 | 4 | 0 |
| Case 1 | 16 | 28,484,556 | 28,608,487  | 2 | 1 | 3 | 0 |
| Case 1 | 16 | 28,615,243 | 28,620,752  | 5 | 1 | 6 | 0 |
| Case 1 | 16 | 28,628,143 | 28,628,143  | 1 | 1 | 2 | 0 |
| Case 1 | 16 | 28,630,188 | 29,910,725  | 2 | 1 | 3 | 0 |
| Case 1 | 16 | 29,911,260 | 29,974,167  | 2 | 2 | 4 | 0 |
| Case 1 | 16 | 29,974,797 | 35,285,582  | 2 | 1 | 3 | 0 |
| Case 1 | 16 | 46,450,037 | 51,620,225  | 2 | 1 | 3 | 0 |
| Case 1 | 16 | 51,623,435 | 51,866,261  | 3 | 1 | 4 | 0 |
| Case 1 | 16 | 51,872,033 | 52,169,814  | 2 | 1 | 3 | 0 |
| Case 1 | 16 | 52,175,900 | 52,532,355  | 3 | 1 | 4 | 0 |



|        |    |            |            |   |   |   |   |
|--------|----|------------|------------|---|---|---|---|
| Case 1 | 16 | 52,534,167 | 53,536,345 | 2 | 1 | 3 | 0 |
| Case 1 | 16 | 53,537,423 | 53,922,822 | 3 | 1 | 4 | 0 |
| Case 1 | 16 | 53,922,838 | 54,114,529 | 2 | 1 | 3 | 0 |
| Case 1 | 16 | 54,114,824 | 54,294,206 | 3 | 1 | 4 | 0 |
| Case 1 | 16 | 54,299,503 | 55,778,145 | 2 | 1 | 3 | 0 |
| Case 1 | 16 | 55,778,836 | 55,866,937 | 3 | 1 | 4 | 0 |
| Case 1 | 16 | 55,867,581 | 58,687,068 | 2 | 1 | 3 | 0 |
| Case 1 | 16 | 58,688,876 | 59,745,602 | 3 | 1 | 4 | 0 |
| Case 1 | 16 | 59,745,634 | 60,216,447 | 2 | 1 | 3 | 0 |
| Case 1 | 16 | 60,227,786 | 60,494,345 | 3 | 1 | 4 | 0 |
| Case 1 | 16 | 60,496,338 | 60,767,611 | 2 | 1 | 3 | 0 |
| Case 1 | 16 | 60,768,007 | 62,718,064 | 3 | 1 | 4 | 0 |
| Case 1 | 16 | 62,720,635 | 63,103,009 | 2 | 1 | 3 | 0 |
| Case 1 | 16 | 63,103,583 | 64,760,841 | 3 | 1 | 4 | 0 |
| Case 1 | 16 | 64,762,426 | 65,932,333 | 2 | 1 | 3 | 0 |
| Case 1 | 16 | 65,935,438 | 66,329,568 | 3 | 1 | 4 | 0 |
| Case 1 | 16 | 66,329,970 | 69,385,641 | 2 | 1 | 3 | 0 |
| Case 1 | 16 | 69,390,938 | 69,646,122 | 3 | 1 | 4 | 0 |
| Case 1 | 16 | 69,660,329 | 72,210,865 | 2 | 1 | 3 | 0 |
| Case 1 | 16 | 72,214,276 | 72,754,901 | 3 | 1 | 4 | 0 |
| Case 1 | 16 | 72,777,225 | 73,330,511 | 2 | 1 | 3 | 0 |
| Case 1 | 16 | 73,331,408 | 74,085,326 | 3 | 1 | 4 | 0 |
| Case 1 | 16 | 74,087,814 | 75,904,514 | 2 | 1 | 3 | 0 |
| Case 1 | 16 | 75,922,170 | 76,476,160 | 3 | 1 | 4 | 0 |
| Case 1 | 16 | 76,482,001 | 76,682,263 | 2 | 1 | 3 | 0 |
| Case 1 | 16 | 76,699,169 | 77,019,087 | 3 | 1 | 4 | 0 |
| Case 1 | 16 | 77,027,507 | 77,435,266 | 2 | 1 | 3 | 0 |
| Case 1 | 16 | 77,439,612 | 77,567,809 | 3 | 1 | 4 | 0 |
| Case 1 | 16 | 77,568,795 | 78,264,680 | 2 | 1 | 3 | 0 |
| Case 1 | 16 | 78,265,836 | 79,112,450 | 3 | 1 | 4 | 0 |
| Case 1 | 16 | 79,112,837 | 79,219,660 | 2 | 1 | 3 | 0 |
| Case 1 | 16 | 79,221,892 | 79,520,553 | 3 | 1 | 4 | 0 |
| Case 1 | 16 | 79,522,673 | 80,199,406 | 2 | 1 | 3 | 0 |
| Case 1 | 16 | 80,202,969 | 80,970,327 | 3 | 1 | 4 | 0 |
| Case 1 | 16 | 80,975,540 | 81,971,435 | 2 | 1 | 3 | 0 |
| Case 1 | 16 | 81,971,582 | 81,989,484 | 3 | 1 | 4 | 0 |
| Case 1 | 16 | 81,990,400 | 82,491,526 | 2 | 1 | 3 | 0 |
| Case 1 | 16 | 82,493,355 | 82,828,137 | 3 | 1 | 4 | 0 |
| Case 1 | 16 | 82,828,365 | 83,010,295 | 2 | 1 | 3 | 0 |
| Case 1 | 16 | 83,012,842 | 83,196,443 | 3 | 1 | 4 | 0 |
| Case 1 | 16 | 83,197,361 | 83,625,563 | 2 | 1 | 3 | 0 |
| Case 1 | 16 | 83,626,088 | 83,767,908 | 3 | 1 | 4 | 0 |
| Case 1 | 16 | 83,770,853 | 90,274,695 | 2 | 1 | 3 | 0 |
| Case 1 | 17 | 11,885     | 2,341,373  | 2 | 0 | 2 | 1 |
| Case 1 | 17 | 2,354,406  | 2,579,900  | 1 | 0 | 1 | 0 |
| Case 1 | 17 | 2,586,229  | 3,111,580  | 2 | 0 | 2 | 1 |
| Case 1 | 17 | 3,111,798  | 3,181,384  | 1 | 0 | 1 | 0 |
| Case 1 | 17 | 3,186,455  | 3,337,960  | 2 | 0 | 2 | 1 |
| Case 1 | 17 | 3,342,002  | 3,402,272  | 1 | 0 | 1 | 0 |
| Case 1 | 17 | 3,402,294  | 3,953,083  | 2 | 0 | 2 | 1 |
| Case 1 | 17 | 3,953,102  | 4,047,062  | 1 | 0 | 1 | 0 |
| Case 1 | 17 | 4,047,227  | 4,098,747  | 2 | 0 | 2 | 1 |
| Case 1 | 17 | 4,104,311  | 4,240,629  | 1 | 0 | 1 | 0 |
| Case 1 | 17 | 4,242,178  | 4,460,445  | 2 | 0 | 2 | 1 |
| Case 1 | 17 | 4,461,467  | 4,462,304  | 1 | 0 | 1 | 0 |
| Case 1 | 17 | 4,462,895  | 5,358,671  | 2 | 0 | 2 | 1 |
| Case 1 | 17 | 5,359,190  | 5,404,270  | 1 | 0 | 1 | 0 |
| Case 1 | 17 | 5,415,287  | 5,600,025  | 2 | 0 | 2 | 1 |
| Case 1 | 17 | 5,600,117  | 5,687,387  | 1 | 0 | 1 | 0 |
| Case 1 | 17 | 5,687,717  | 5,728,122  | 2 | 0 | 2 | 1 |
| Case 1 | 17 | 5,728,500  | 5,756,338  | 1 | 0 | 1 | 0 |

|        |    |             |             |   |   |   |   |
|--------|----|-------------|-------------|---|---|---|---|
| Case 1 | 17 | 5,757,530   | 16,282,238  | 2 | 0 | 2 | 1 |
| Case 1 | 17 | 16,282,454  | 22,242,355  | 2 | 1 | 3 | 0 |
| Case 1 | 17 | 25,268,142  | 81,060,040  | 2 | 1 | 3 | 0 |
| Case 1 | 18 | 87,505      | 9,623,052   | 1 | 1 | 2 | 0 |
| Case 1 | 18 | 9,625,750   | 9,846,033   | 2 | 1 | 3 | 0 |
| Case 1 | 18 | 9,847,545   | 9,871,870   | 2 | 0 | 2 | 1 |
| Case 1 | 18 | 9,871,956   | 12,056,850  | 1 | 1 | 2 | 0 |
| Case 1 | 18 | 12,066,145  | 12,160,236  | 2 | 0 | 2 | 1 |
| Case 1 | 18 | 12,211,483  | 15,375,878  | 1 | 1 | 2 | 0 |
| Case 1 | 18 | 18,520,354  | 78,015,180  | 1 | 1 | 2 | 0 |
| Case 1 | 19 | 260,912     | 8,285,607   | 1 | 1 | 2 | 0 |
| Case 1 | 19 | 8,289,519   | 8,399,272   | 2 | 0 | 2 | 1 |
| Case 1 | 19 | 8,399,458   | 12,244,624  | 1 | 1 | 2 | 0 |
| Case 1 | 19 | 12,244,657  | 12,463,856  | 2 | 0 | 2 | 1 |
| Case 1 | 19 | 12,474,388  | 20,495,521  | 1 | 1 | 2 | 0 |
| Case 1 | 19 | 20,497,400  | 20,500,515  | 2 | 0 | 2 | 1 |
| Case 1 | 19 | 20,626,179  | 20,701,612  | 1 | 0 | 1 | 0 |
| Case 1 | 19 | 20,704,619  | 20,707,568  | 2 | 0 | 2 | 1 |
| Case 1 | 19 | 20,715,228  | 22,846,788  | 1 | 1 | 2 | 0 |
| Case 1 | 19 | 22,849,357  | 24,629,285  | 2 | 0 | 2 | 1 |
| Case 1 | 19 | 27,732,159  | 28,246,742  | 2 | 0 | 2 | 1 |
| Case 1 | 19 | 28,252,131  | 45,652,079  | 1 | 1 | 2 | 0 |
| Case 1 | 19 | 45,655,303  | 59,097,160  | 2 | 1 | 3 | 0 |
| Case 1 | 20 | 63,244      | 25,457,561  | 2 | 2 | 4 | 0 |
| Case 1 | 20 | 25,457,690  | 26,293,985  | 3 | 1 | 4 | 0 |
| Case 1 | 20 | 29,425,357  | 37,884,565  | 3 | 1 | 4 | 0 |
| Case 1 | 20 | 37,905,431  | 38,872,419  | 3 | 2 | 5 | 0 |
| Case 1 | 20 | 38,873,093  | 39,154,095  | 2 | 2 | 4 | 0 |
| Case 1 | 20 | 39,156,173  | 50,648,464  | 3 | 1 | 4 | 0 |
| Case 1 | 20 | 50,652,937  | 51,790,871  | 3 | 2 | 5 | 0 |
| Case 1 | 20 | 51,793,036  | 51,800,587  | 2 | 2 | 4 | 0 |
| Case 1 | 20 | 51,801,046  | 51,891,390  | 3 | 1 | 4 | 0 |
| Case 1 | 20 | 51,891,748  | 54,465,775  | 3 | 2 | 5 | 0 |
| Case 1 | 20 | 54,467,126  | 58,411,279  | 2 | 2 | 4 | 0 |
| Case 1 | 20 | 58,411,580  | 58,413,101  | 3 | 1 | 4 | 0 |
| Case 1 | 20 | 58,416,428  | 58,502,456  | 3 | 2 | 5 | 0 |
| Case 1 | 20 | 58,502,648  | 59,080,798  | 2 | 2 | 4 | 0 |
| Case 1 | 20 | 59,081,696  | 59,166,994  | 3 | 2 | 5 | 0 |
| Case 1 | 20 | 59,168,069  | 62,948,788  | 2 | 2 | 4 | 0 |
| Case 1 | 21 | 10,827,533  | 10,971,337  | 2 | 0 | 2 | 1 |
| Case 1 | 21 | 14,368,320  | 48,100,155  | 2 | 0 | 2 | 1 |
| Case 1 | 22 | 16,114,244  | 51,195,728  | 2 | 1 | 3 | 0 |
| Case 2 | 1  | 82,154      | 16,359,717  | 3 | 1 | 4 | 0 |
| Case 2 | 1  | 16,367,339  | 16,382,966  | 4 | 1 | 5 | 0 |
| Case 2 | 1  | 16,386,391  | 17,273,371  | 3 | 1 | 4 | 0 |
| Case 2 | 1  | 17,281,235  | 102,155,106 | 2 | 1 | 3 | 0 |
| Case 2 | 1  | 102,159,783 | 102,229,920 | 1 | 1 | 2 | 0 |
| Case 2 | 1  | 102,236,122 | 121,346,616 | 2 | 1 | 3 | 0 |
| Case 2 | 1  | 142,649,718 | 144,866,688 | 2 | 1 | 3 | 0 |
| Case 2 | 1  | 144,867,953 | 156,972,485 | 3 | 1 | 4 | 0 |
| Case 2 | 1  | 156,992,753 | 157,467,562 | 4 | 1 | 5 | 0 |
| Case 2 | 1  | 157,470,168 | 162,878,023 | 3 | 1 | 4 | 0 |
| Case 2 | 1  | 162,879,819 | 163,090,421 | 4 | 1 | 5 | 0 |
| Case 2 | 1  | 163,093,022 | 163,345,829 | 3 | 1 | 4 | 0 |
| Case 2 | 1  | 163,348,444 | 163,842,961 | 4 | 1 | 5 | 0 |
| Case 2 | 1  | 163,843,851 | 166,128,406 | 3 | 1 | 4 | 0 |
| Case 2 | 1  | 166,130,218 | 166,709,642 | 4 | 1 | 5 | 0 |
| Case 2 | 1  | 166,711,398 | 167,102,492 | 3 | 1 | 4 | 0 |
| Case 2 | 1  | 167,103,023 | 167,597,473 | 4 | 1 | 5 | 0 |
| Case 2 | 1  | 167,597,866 | 168,327,555 | 3 | 1 | 4 | 0 |
| Case 2 | 1  | 168,329,363 | 168,907,072 | 4 | 1 | 5 | 0 |

|        |   |             |             |   |   |   |   |
|--------|---|-------------|-------------|---|---|---|---|
| Case 2 | 1 | 168,907,616 | 173,246,262 | 3 | 1 | 4 | 0 |
| Case 2 | 1 | 173,249,439 | 173,381,535 | 4 | 1 | 5 | 0 |
| Case 2 | 1 | 173,381,640 | 178,491,966 | 3 | 1 | 4 | 0 |
| Case 2 | 1 | 178,492,635 | 179,757,536 | 4 | 1 | 5 | 0 |
| Case 2 | 1 | 179,757,855 | 180,217,250 | 3 | 1 | 4 | 0 |
| Case 2 | 1 | 180,218,442 | 180,564,513 | 4 | 1 | 5 | 0 |
| Case 2 | 1 | 180,567,428 | 182,027,144 | 3 | 1 | 4 | 0 |
| Case 2 | 1 | 182,039,442 | 182,420,448 | 4 | 1 | 5 | 0 |
| Case 2 | 1 | 182,422,667 | 183,923,972 | 3 | 1 | 4 | 0 |
| Case 2 | 1 | 183,925,087 | 184,352,288 | 4 | 1 | 5 | 0 |
| Case 2 | 1 | 184,354,234 | 188,613,133 | 3 | 1 | 4 | 0 |
| Case 2 | 1 | 188,617,210 | 189,653,244 | 4 | 1 | 5 | 0 |
| Case 2 | 1 | 189,658,034 | 190,467,826 | 3 | 1 | 4 | 0 |
| Case 2 | 1 | 190,472,727 | 249,218,992 | 4 | 1 | 5 | 0 |
| Case 2 | 2 | 18,674      | 2,659,311   | 2 | 1 | 3 | 0 |
| Case 2 | 2 | 2,662,292   | 2,850,880   | 2 | 2 | 4 | 0 |
| Case 2 | 2 | 2,855,949   | 7,383,183   | 2 | 1 | 3 | 0 |
| Case 2 | 2 | 7,383,538   | 7,437,247   | 2 | 2 | 4 | 0 |
| Case 2 | 2 | 7,439,390   | 8,235,087   | 2 | 1 | 3 | 0 |
| Case 2 | 2 | 8,235,239   | 8,458,707   | 2 | 2 | 4 | 0 |
| Case 2 | 2 | 8,459,919   | 10,197,615  | 2 | 1 | 3 | 0 |
| Case 2 | 2 | 10,198,113  | 11,159,080  | 2 | 2 | 4 | 0 |
| Case 2 | 2 | 11,160,768  | 15,825,988  | 2 | 1 | 3 | 0 |
| Case 2 | 2 | 15,826,700  | 16,079,754  | 2 | 2 | 4 | 0 |
| Case 2 | 2 | 16,082,465  | 19,971,625  | 2 | 1 | 3 | 0 |
| Case 2 | 2 | 19,973,210  | 20,095,690  | 2 | 2 | 4 | 0 |
| Case 2 | 2 | 20,096,767  | 20,218,658  | 2 | 1 | 3 | 0 |
| Case 2 | 2 | 20,224,999  | 20,428,737  | 2 | 2 | 4 | 0 |
| Case 2 | 2 | 20,430,049  | 20,581,058  | 2 | 1 | 3 | 0 |
| Case 2 | 2 | 20,590,635  | 20,829,962  | 2 | 2 | 4 | 0 |
| Case 2 | 2 | 20,831,601  | 23,592,145  | 2 | 1 | 3 | 0 |
| Case 2 | 2 | 23,595,352  | 23,898,317  | 2 | 2 | 4 | 0 |
| Case 2 | 2 | 23,898,966  | 26,667,185  | 2 | 1 | 3 | 0 |
| Case 2 | 2 | 26,667,592  | 26,750,758  | 2 | 2 | 4 | 0 |
| Case 2 | 2 | 26,750,769  | 28,494,000  | 2 | 1 | 3 | 0 |
| Case 2 | 2 | 28,498,321  | 28,716,955  | 2 | 2 | 4 | 0 |
| Case 2 | 2 | 28,718,991  | 30,429,330  | 2 | 1 | 3 | 0 |
| Case 2 | 2 | 30,429,735  | 30,581,981  | 2 | 2 | 4 | 0 |
| Case 2 | 2 | 30,588,810  | 30,864,789  | 2 | 1 | 3 | 0 |
| Case 2 | 2 | 30,865,048  | 31,301,634  | 2 | 2 | 4 | 0 |
| Case 2 | 2 | 31,304,147  | 42,141,078  | 2 | 1 | 3 | 0 |
| Case 2 | 2 | 42,141,473  | 42,398,473  | 2 | 2 | 4 | 0 |
| Case 2 | 2 | 42,398,918  | 42,994,641  | 2 | 1 | 3 | 0 |
| Case 2 | 2 | 42,994,647  | 43,450,138  | 2 | 2 | 4 | 0 |
| Case 2 | 2 | 43,451,498  | 44,825,713  | 2 | 1 | 3 | 0 |
| Case 2 | 2 | 44,826,068  | 45,405,049  | 2 | 2 | 4 | 0 |
| Case 2 | 2 | 45,405,066  | 45,829,137  | 2 | 1 | 3 | 0 |
| Case 2 | 2 | 45,831,537  | 46,709,571  | 2 | 2 | 4 | 0 |
| Case 2 | 2 | 46,709,607  | 47,072,226  | 2 | 1 | 3 | 0 |
| Case 2 | 2 | 47,072,414  | 47,288,001  | 2 | 2 | 4 | 0 |
| Case 2 | 2 | 47,288,013  | 47,715,944  | 2 | 1 | 3 | 0 |
| Case 2 | 2 | 47,721,328  | 47,803,729  | 2 | 2 | 4 | 0 |
| Case 2 | 2 | 47,808,152  | 60,033,484  | 2 | 1 | 3 | 0 |
| Case 2 | 2 | 60,039,819  | 60,295,277  | 2 | 2 | 4 | 0 |
| Case 2 | 2 | 60,296,223  | 62,432,133  | 2 | 1 | 3 | 0 |
| Case 2 | 2 | 62,438,681  | 62,816,083  | 2 | 2 | 4 | 0 |
| Case 2 | 2 | 62,817,678  | 64,471,185  | 2 | 1 | 3 | 0 |
| Case 2 | 2 | 64,471,352  | 64,663,169  | 2 | 2 | 4 | 0 |
| Case 2 | 2 | 64,665,661  | 65,791,089  | 2 | 1 | 3 | 0 |
| Case 2 | 2 | 65,791,581  | 66,361,926  | 2 | 2 | 4 | 0 |
| Case 2 | 2 | 66,362,122  | 70,750,531  | 2 | 1 | 3 | 0 |

|        |   |             |             |   |   |   |   |
|--------|---|-------------|-------------|---|---|---|---|
| Case 2 | 2 | 70,752,195  | 70,945,251  | 2 | 2 | 4 | 0 |
| Case 2 | 2 | 70,945,833  | 71,797,813  | 2 | 1 | 3 | 0 |
| Case 2 | 2 | 71,797,818  | 72,405,665  | 2 | 2 | 4 | 0 |
| Case 2 | 2 | 72,405,833  | 85,414,647  | 2 | 1 | 3 | 0 |
| Case 2 | 2 | 85,420,124  | 85,554,265  | 2 | 2 | 4 | 0 |
| Case 2 | 2 | 85,554,287  | 88,407,924  | 2 | 1 | 3 | 0 |
| Case 2 | 2 | 88,407,936  | 88,846,961  | 2 | 2 | 4 | 0 |
| Case 2 | 2 | 88,856,111  | 92,081,640  | 2 | 1 | 3 | 0 |
| Case 2 | 2 | 95,429,424  | 97,494,340  | 2 | 1 | 3 | 0 |
| Case 2 | 2 | 97,494,373  | 97,640,502  | 2 | 2 | 4 | 0 |
| Case 2 | 2 | 97,643,576  | 101,205,999 | 2 | 1 | 3 | 0 |
| Case 2 | 2 | 101,206,265 | 101,343,387 | 2 | 2 | 4 | 0 |
| Case 2 | 2 | 101,343,638 | 102,574,838 | 2 | 1 | 3 | 0 |
| Case 2 | 2 | 102,576,098 | 102,746,083 | 2 | 2 | 4 | 0 |
| Case 2 | 2 | 102,746,276 | 105,713,689 | 2 | 1 | 3 | 0 |
| Case 2 | 2 | 105,717,782 | 106,266,695 | 2 | 2 | 4 | 0 |
| Case 2 | 2 | 106,269,399 | 109,848,994 | 2 | 1 | 3 | 0 |
| Case 2 | 2 | 109,856,486 | 110,002,052 | 2 | 2 | 4 | 0 |
| Case 2 | 2 | 110,004,170 | 113,789,641 | 2 | 1 | 3 | 0 |
| Case 2 | 2 | 113,790,127 | 113,885,130 | 2 | 2 | 4 | 0 |
| Case 2 | 2 | 113,885,322 | 120,933,298 | 2 | 1 | 3 | 0 |
| Case 2 | 2 | 120,942,349 | 121,509,378 | 2 | 2 | 4 | 0 |
| Case 2 | 2 | 121,513,197 | 121,915,252 | 2 | 1 | 3 | 0 |
| Case 2 | 2 | 121,916,540 | 122,051,230 | 2 | 2 | 4 | 0 |
| Case 2 | 2 | 122,055,684 | 127,422,593 | 2 | 1 | 3 | 0 |
| Case 2 | 2 | 127,423,066 | 127,926,992 | 2 | 2 | 4 | 0 |
| Case 2 | 2 | 127,927,050 | 129,045,765 | 2 | 1 | 3 | 0 |
| Case 2 | 2 | 129,050,909 | 129,184,166 | 2 | 2 | 4 | 0 |
| Case 2 | 2 | 129,184,866 | 153,654,720 | 2 | 1 | 3 | 0 |
| Case 2 | 2 | 153,657,990 | 153,670,186 | 2 | 0 | 2 | 1 |
| Case 2 | 2 | 153,675,592 | 153,781,648 | 1 | 0 | 1 | 0 |
| Case 2 | 2 | 153,787,485 | 153,789,391 | 2 | 0 | 2 | 1 |
| Case 2 | 2 | 153,811,011 | 159,558,658 | 2 | 1 | 3 | 0 |
| Case 2 | 2 | 159,559,624 | 159,660,870 | 2 | 2 | 4 | 0 |
| Case 2 | 2 | 159,661,485 | 172,935,634 | 2 | 1 | 3 | 0 |
| Case 2 | 2 | 172,935,641 | 173,327,273 | 2 | 2 | 4 | 0 |
| Case 2 | 2 | 173,332,115 | 187,167,278 | 2 | 1 | 3 | 0 |
| Case 2 | 2 | 187,210,847 | 187,775,780 | 3 | 1 | 4 | 0 |
| Case 2 | 2 | 187,778,830 | 205,114,083 | 2 | 1 | 3 | 0 |
| Case 2 | 2 | 205,114,593 | 205,194,890 | 2 | 2 | 4 | 0 |
| Case 2 | 2 | 205,204,850 | 208,169,592 | 2 | 1 | 3 | 0 |
| Case 2 | 2 | 208,173,545 | 208,444,028 | 2 | 2 | 4 | 0 |
| Case 2 | 2 | 208,454,151 | 217,070,248 | 2 | 1 | 3 | 0 |
| Case 2 | 2 | 217,070,376 | 217,794,455 | 2 | 2 | 4 | 0 |
| Case 2 | 2 | 217,799,675 | 218,683,397 | 2 | 1 | 3 | 0 |
| Case 2 | 2 | 218,683,449 | 219,028,938 | 2 | 2 | 4 | 0 |
| Case 2 | 2 | 219,028,997 | 224,945,517 | 2 | 1 | 3 | 0 |
| Case 2 | 2 | 224,946,032 | 225,045,264 | 2 | 2 | 4 | 0 |
| Case 2 | 2 | 225,047,744 | 231,521,950 | 2 | 1 | 3 | 0 |
| Case 2 | 2 | 231,527,626 | 231,921,182 | 2 | 2 | 4 | 0 |
| Case 2 | 2 | 231,931,799 | 233,067,382 | 2 | 1 | 3 | 0 |
| Case 2 | 2 | 233,076,420 | 233,520,942 | 2 | 2 | 4 | 0 |
| Case 2 | 2 | 233,523,075 | 234,694,177 | 2 | 1 | 3 | 0 |
| Case 2 | 2 | 234,698,790 | 234,740,758 | 2 | 2 | 4 | 0 |
| Case 2 | 2 | 234,741,808 | 234,961,435 | 2 | 1 | 3 | 0 |
| Case 2 | 2 | 234,962,085 | 235,325,268 | 2 | 2 | 4 | 0 |
| Case 2 | 2 | 235,326,552 | 236,150,508 | 2 | 1 | 3 | 0 |
| Case 2 | 2 | 236,152,504 | 236,320,610 | 2 | 2 | 4 | 0 |
| Case 2 | 2 | 236,322,756 | 238,498,996 | 2 | 1 | 3 | 0 |
| Case 2 | 2 | 238,499,444 | 238,571,499 | 2 | 2 | 4 | 0 |
| Case 2 | 2 | 238,574,426 | 243,048,760 | 2 | 1 | 3 | 0 |

|        |   |            |            |   |   |   |   |
|--------|---|------------|------------|---|---|---|---|
| Case 2 | 3 | 61,495     | 2,146,913  | 3 | 0 | 3 | 1 |
| Case 2 | 3 | 2,150,400  | 2,264,609  | 3 | 1 | 4 | 0 |
| Case 2 | 3 | 2,266,520  | 2,844,699  | 3 | 0 | 3 | 1 |
| Case 2 | 3 | 2,845,843  | 2,895,719  | 3 | 1 | 4 | 0 |
| Case 2 | 3 | 2,895,810  | 3,556,810  | 2 | 1 | 3 | 0 |
| Case 2 | 3 | 3,556,881  | 3,792,945  | 3 | 1 | 4 | 0 |
| Case 2 | 3 | 3,796,045  | 4,041,690  | 3 | 0 | 3 | 1 |
| Case 2 | 3 | 4,045,707  | 4,148,058  | 3 | 1 | 4 | 0 |
| Case 2 | 3 | 4,149,176  | 4,532,469  | 3 | 0 | 3 | 1 |
| Case 2 | 3 | 4,534,629  | 5,184,958  | 3 | 1 | 4 | 0 |
| Case 2 | 3 | 5,191,756  | 5,340,620  | 3 | 0 | 3 | 1 |
| Case 2 | 3 | 5,343,801  | 5,648,291  | 3 | 1 | 4 | 0 |
| Case 2 | 3 | 5,654,382  | 7,509,265  | 3 | 0 | 3 | 1 |
| Case 2 | 3 | 7,510,856  | 8,542,278  | 3 | 1 | 4 | 0 |
| Case 2 | 3 | 8,546,102  | 8,738,790  | 3 | 0 | 3 | 1 |
| Case 2 | 3 | 8,745,085  | 8,841,641  | 3 | 1 | 4 | 0 |
| Case 2 | 3 | 8,848,916  | 9,034,724  | 3 | 0 | 3 | 1 |
| Case 2 | 3 | 9,039,469  | 9,225,376  | 3 | 1 | 4 | 0 |
| Case 2 | 3 | 9,227,644  | 9,724,926  | 3 | 0 | 3 | 1 |
| Case 2 | 3 | 9,726,588  | 9,934,231  | 3 | 1 | 4 | 0 |
| Case 2 | 3 | 9,934,605  | 10,332,365 | 3 | 0 | 3 | 1 |
| Case 2 | 3 | 10,334,532 | 11,206,966 | 3 | 1 | 4 | 0 |
| Case 2 | 3 | 11,211,338 | 11,568,144 | 3 | 0 | 3 | 1 |
| Case 2 | 3 | 11,578,151 | 12,395,958 | 3 | 1 | 4 | 0 |
| Case 2 | 3 | 12,398,636 | 13,018,488 | 2 | 1 | 3 | 0 |
| Case 2 | 3 | 13,025,899 | 13,313,582 | 3 | 1 | 4 | 0 |
| Case 2 | 3 | 13,315,549 | 13,535,631 | 3 | 0 | 3 | 1 |
| Case 2 | 3 | 13,537,240 | 13,649,339 | 3 | 1 | 4 | 0 |
| Case 2 | 3 | 13,649,762 | 13,825,666 | 3 | 0 | 3 | 1 |
| Case 2 | 3 | 13,826,854 | 14,928,335 | 3 | 1 | 4 | 0 |
| Case 2 | 3 | 14,932,156 | 15,480,726 | 3 | 0 | 3 | 1 |
| Case 2 | 3 | 15,483,830 | 15,624,390 | 3 | 1 | 4 | 0 |
| Case 2 | 3 | 15,624,419 | 16,480,827 | 3 | 0 | 3 | 1 |
| Case 2 | 3 | 16,485,219 | 16,625,048 | 3 | 1 | 4 | 0 |
| Case 2 | 3 | 16,627,187 | 16,684,658 | 3 | 0 | 3 | 1 |
| Case 2 | 3 | 16,686,195 | 16,862,873 | 3 | 1 | 4 | 0 |
| Case 2 | 3 | 16,866,253 | 16,866,253 | 3 | 0 | 3 | 1 |
| Case 2 | 3 | 16,874,088 | 17,346,355 | 2 | 1 | 3 | 0 |
| Case 2 | 3 | 17,347,056 | 18,603,113 | 3 | 0 | 3 | 1 |
| Case 2 | 3 | 18,604,810 | 18,808,580 | 3 | 1 | 4 | 0 |
| Case 2 | 3 | 18,812,072 | 20,079,878 | 3 | 0 | 3 | 1 |
| Case 2 | 3 | 20,080,132 | 20,162,216 | 3 | 1 | 4 | 0 |
| Case 2 | 3 | 20,164,175 | 20,693,062 | 3 | 0 | 3 | 1 |
| Case 2 | 3 | 20,695,652 | 20,767,286 | 3 | 1 | 4 | 0 |
| Case 2 | 3 | 20,772,716 | 21,647,818 | 3 | 0 | 3 | 1 |
| Case 2 | 3 | 21,650,537 | 21,771,710 | 3 | 1 | 4 | 0 |
| Case 2 | 3 | 21,771,769 | 22,383,444 | 3 | 0 | 3 | 1 |
| Case 2 | 3 | 22,385,375 | 22,476,773 | 3 | 1 | 4 | 0 |
| Case 2 | 3 | 22,482,089 | 22,973,863 | 3 | 0 | 3 | 1 |
| Case 2 | 3 | 22,983,152 | 23,125,668 | 3 | 1 | 4 | 0 |
| Case 2 | 3 | 23,126,649 | 23,474,611 | 3 | 0 | 3 | 1 |
| Case 2 | 3 | 23,483,536 | 23,976,031 | 3 | 1 | 4 | 0 |
| Case 2 | 3 | 23,980,440 | 24,043,710 | 2 | 1 | 3 | 0 |
| Case 2 | 3 | 24,044,111 | 24,282,982 | 3 | 1 | 4 | 0 |
| Case 2 | 3 | 24,284,924 | 24,357,082 | 3 | 0 | 3 | 1 |
| Case 2 | 3 | 24,357,243 | 25,648,865 | 3 | 1 | 4 | 0 |
| Case 2 | 3 | 25,650,812 | 26,631,359 | 3 | 0 | 3 | 1 |
| Case 2 | 3 | 26,633,278 | 27,188,306 | 3 | 1 | 4 | 0 |
| Case 2 | 3 | 27,199,604 | 29,312,810 | 3 | 0 | 3 | 1 |
| Case 2 | 3 | 29,319,042 | 29,376,770 | 3 | 1 | 4 | 0 |
| Case 2 | 3 | 29,377,989 | 29,992,733 | 3 | 0 | 3 | 1 |

|        |   |            |             |   |   |   |   |
|--------|---|------------|-------------|---|---|---|---|
| Case 2 | 3 | 29,993,977 | 30,594,586  | 3 | 1 | 4 | 0 |
| Case 2 | 3 | 30,606,591 | 31,030,755  | 3 | 0 | 3 | 1 |
| Case 2 | 3 | 31,039,428 | 31,551,780  | 3 | 1 | 4 | 0 |
| Case 2 | 3 | 31,554,627 | 31,922,955  | 3 | 0 | 3 | 1 |
| Case 2 | 3 | 31,926,807 | 31,989,487  | 3 | 1 | 4 | 0 |
| Case 2 | 3 | 31,989,920 | 32,359,009  | 3 | 0 | 3 | 1 |
| Case 2 | 3 | 32,362,998 | 32,996,509  | 3 | 1 | 4 | 0 |
| Case 2 | 3 | 33,000,768 | 33,644,497  | 3 | 0 | 3 | 1 |
| Case 2 | 3 | 33,648,715 | 34,824,653  | 3 | 1 | 4 | 0 |
| Case 2 | 3 | 34,824,952 | 36,239,406  | 3 | 0 | 3 | 1 |
| Case 2 | 3 | 36,240,905 | 36,694,732  | 3 | 1 | 4 | 0 |
| Case 2 | 3 | 36,701,434 | 38,042,947  | 3 | 0 | 3 | 1 |
| Case 2 | 3 | 38,042,993 | 38,206,906  | 3 | 1 | 4 | 0 |
| Case 2 | 3 | 38,224,533 | 38,357,156  | 3 | 0 | 3 | 1 |
| Case 2 | 3 | 38,357,175 | 38,599,037  | 3 | 1 | 4 | 0 |
| Case 2 | 3 | 38,602,855 | 39,005,889  | 3 | 0 | 3 | 1 |
| Case 2 | 3 | 39,016,788 | 39,111,140  | 3 | 1 | 4 | 0 |
| Case 2 | 3 | 39,118,104 | 39,225,442  | 3 | 0 | 3 | 1 |
| Case 2 | 3 | 39,225,585 | 39,891,794  | 3 | 1 | 4 | 0 |
| Case 2 | 3 | 39,895,642 | 40,087,181  | 3 | 0 | 3 | 1 |
| Case 2 | 3 | 40,088,077 | 40,519,532  | 3 | 1 | 4 | 0 |
| Case 2 | 3 | 40,523,409 | 41,063,760  | 2 | 1 | 3 | 0 |
| Case 2 | 3 | 41,065,413 | 41,457,654  | 3 | 1 | 4 | 0 |
| Case 2 | 3 | 41,458,709 | 42,067,669  | 2 | 1 | 3 | 0 |
| Case 2 | 3 | 42,073,957 | 42,573,022  | 3 | 1 | 4 | 0 |
| Case 2 | 3 | 42,577,733 | 42,684,016  | 3 | 0 | 3 | 1 |
| Case 2 | 3 | 42,689,777 | 43,248,393  | 3 | 1 | 4 | 0 |
| Case 2 | 3 | 43,250,297 | 44,929,195  | 2 | 1 | 3 | 0 |
| Case 2 | 3 | 44,929,287 | 45,403,826  | 3 | 1 | 4 | 0 |
| Case 2 | 3 | 45,405,467 | 45,604,159  | 3 | 0 | 3 | 1 |
| Case 2 | 3 | 45,606,651 | 45,837,875  | 3 | 1 | 4 | 0 |
| Case 2 | 3 | 45,837,886 | 46,101,257  | 3 | 0 | 3 | 1 |
| Case 2 | 3 | 46,101,371 | 46,179,868  | 3 | 1 | 4 | 0 |
| Case 2 | 3 | 46,180,416 | 46,586,179  | 2 | 1 | 3 | 0 |
| Case 2 | 3 | 46,586,534 | 49,760,062  | 3 | 0 | 3 | 1 |
| Case 2 | 3 | 49,760,065 | 49,927,459  | 3 | 1 | 4 | 0 |
| Case 2 | 3 | 49,927,503 | 50,172,397  | 3 | 0 | 3 | 1 |
| Case 2 | 3 | 50,174,197 | 50,597,092  | 3 | 1 | 4 | 0 |
| Case 2 | 3 | 50,598,400 | 52,547,929  | 3 | 0 | 3 | 1 |
| Case 2 | 3 | 52,548,189 | 59,912,933  | 3 | 1 | 4 | 0 |
| Case 2 | 3 | 59,916,314 | 60,105,329  | 2 | 1 | 3 | 0 |
| Case 2 | 3 | 60,106,852 | 60,152,583  | 3 | 1 | 4 | 0 |
| Case 2 | 3 | 60,159,463 | 60,276,722  | 3 | 0 | 3 | 1 |
| Case 2 | 3 | 60,277,771 | 60,364,830  | 3 | 1 | 4 | 0 |
| Case 2 | 3 | 60,370,362 | 60,554,521  | 2 | 0 | 2 | 1 |
| Case 2 | 3 | 60,557,685 | 60,788,842  | 2 | 1 | 3 | 0 |
| Case 2 | 3 | 60,792,282 | 61,168,215  | 3 | 1 | 4 | 0 |
| Case 2 | 3 | 61,176,788 | 61,190,420  | 2 | 0 | 2 | 1 |
| Case 2 | 3 | 61,205,741 | 61,205,741  | 3 | 0 | 3 | 1 |
| Case 2 | 3 | 61,205,924 | 61,708,608  | 3 | 1 | 4 | 0 |
| Case 2 | 3 | 61,712,041 | 61,853,342  | 3 | 0 | 3 | 1 |
| Case 2 | 3 | 61,853,529 | 76,633,507  | 3 | 1 | 4 | 0 |
| Case 2 | 3 | 76,636,887 | 77,651,985  | 2 | 1 | 3 | 0 |
| Case 2 | 3 | 77,666,778 | 78,144,437  | 3 | 1 | 4 | 0 |
| Case 2 | 3 | 78,161,505 | 80,354,251  | 2 | 1 | 3 | 0 |
| Case 2 | 3 | 80,355,773 | 82,920,077  | 3 | 1 | 4 | 0 |
| Case 2 | 3 | 82,922,156 | 84,785,549  | 2 | 1 | 3 | 0 |
| Case 2 | 3 | 84,790,582 | 90,442,925  | 3 | 1 | 4 | 0 |
| Case 2 | 3 | 93,537,290 | 97,919,363  | 3 | 1 | 4 | 0 |
| Case 2 | 3 | 97,935,125 | 98,110,303  | 3 | 0 | 3 | 1 |
| Case 2 | 3 | 98,110,363 | 100,976,375 | 3 | 1 | 4 | 0 |

|        |   |             |             |   |   |   |   |
|--------|---|-------------|-------------|---|---|---|---|
| Case 2 | 3 | 100,976,613 | 107,527,596 | 3 | 0 | 3 | 1 |
| Case 2 | 3 | 107,538,740 | 107,763,040 | 4 | 0 | 4 | 1 |
| Case 2 | 3 | 107,765,392 | 115,462,762 | 3 | 0 | 3 | 1 |
| Case 2 | 3 | 115,478,263 | 116,039,842 | 4 | 0 | 4 | 1 |
| Case 2 | 3 | 116,041,338 | 119,350,324 | 3 | 0 | 3 | 1 |
| Case 2 | 3 | 119,353,185 | 119,426,311 | 4 | 0 | 4 | 1 |
| Case 2 | 3 | 119,426,409 | 121,251,934 | 3 | 0 | 3 | 1 |
| Case 2 | 3 | 121,252,048 | 121,412,618 | 3 | 1 | 4 | 0 |
| Case 2 | 3 | 121,412,702 | 121,514,161 | 3 | 0 | 3 | 1 |
| Case 2 | 3 | 121,516,059 | 144,698,368 | 3 | 1 | 4 | 0 |
| Case 2 | 3 | 144,701,909 | 145,095,986 | 3 | 0 | 3 | 1 |
| Case 2 | 3 | 145,102,498 | 174,231,077 | 3 | 1 | 4 | 0 |
| Case 2 | 3 | 174,241,461 | 176,149,354 | 4 | 1 | 5 | 0 |
| Case 2 | 3 | 176,150,365 | 184,549,539 | 2 | 1 | 3 | 0 |
| Case 2 | 3 | 184,550,501 | 184,910,133 | 2 | 0 | 2 | 1 |
| Case 2 | 3 | 184,910,136 | 185,079,487 | 3 | 0 | 3 | 1 |
| Case 2 | 3 | 185,087,708 | 185,786,406 | 2 | 0 | 2 | 1 |
| Case 2 | 3 | 185,795,855 | 186,107,980 | 3 | 0 | 3 | 1 |
| Case 2 | 3 | 186,108,018 | 187,251,425 | 2 | 0 | 2 | 1 |
| Case 2 | 3 | 187,264,516 | 187,924,902 | 3 | 0 | 3 | 1 |
| Case 2 | 3 | 187,930,047 | 193,581,231 | 2 | 0 | 2 | 1 |
| Case 2 | 3 | 193,581,469 | 194,110,884 | 3 | 0 | 3 | 1 |
| Case 2 | 3 | 194,112,249 | 194,521,981 | 2 | 0 | 2 | 1 |
| Case 2 | 3 | 194,522,048 | 194,564,931 | 3 | 0 | 3 | 1 |
| Case 2 | 3 | 194,574,108 | 194,669,375 | 2 | 0 | 2 | 1 |
| Case 2 | 3 | 194,669,416 | 194,987,569 | 3 | 0 | 3 | 1 |
| Case 2 | 3 | 194,990,363 | 195,264,241 | 2 | 0 | 2 | 1 |
| Case 2 | 3 | 195,269,749 | 197,838,262 | 2 | 1 | 3 | 0 |
| Case 2 | 4 | 71,566      | 639,670     | 2 | 0 | 2 | 1 |
| Case 2 | 4 | 640,165     | 947,035     | 3 | 0 | 3 | 1 |
| Case 2 | 4 | 949,214     | 985,296     | 2 | 0 | 2 | 1 |
| Case 2 | 4 | 985,310     | 1,563,920   | 3 | 0 | 3 | 1 |
| Case 2 | 4 | 1,566,164   | 1,944,099   | 2 | 0 | 2 | 1 |
| Case 2 | 4 | 1,947,324   | 2,106,836   | 3 | 0 | 3 | 1 |
| Case 2 | 4 | 2,129,906   | 2,306,871   | 2 | 0 | 2 | 1 |
| Case 2 | 4 | 2,306,896   | 2,956,258   | 3 | 0 | 3 | 1 |
| Case 2 | 4 | 2,956,290   | 3,270,488   | 2 | 0 | 2 | 1 |
| Case 2 | 4 | 3,283,422   | 3,430,406   | 3 | 0 | 3 | 1 |
| Case 2 | 4 | 3,430,862   | 3,446,513   | 2 | 0 | 2 | 1 |
| Case 2 | 4 | 3,447,042   | 3,875,234   | 3 | 0 | 3 | 1 |
| Case 2 | 4 | 3,881,341   | 4,346,237   | 2 | 0 | 2 | 1 |
| Case 2 | 4 | 4,346,427   | 4,984,192   | 3 | 0 | 3 | 1 |
| Case 2 | 4 | 4,985,810   | 5,112,978   | 2 | 0 | 2 | 1 |
| Case 2 | 4 | 5,115,426   | 5,216,885   | 3 | 0 | 3 | 1 |
| Case 2 | 4 | 5,218,136   | 5,827,079   | 2 | 0 | 2 | 1 |
| Case 2 | 4 | 5,830,233   | 7,074,583   | 3 | 0 | 3 | 1 |
| Case 2 | 4 | 7,084,835   | 8,218,727   | 4 | 0 | 4 | 1 |
| Case 2 | 4 | 8,218,737   | 9,714,968   | 3 | 0 | 3 | 1 |
| Case 2 | 4 | 9,722,133   | 10,413,908  | 4 | 0 | 4 | 1 |
| Case 2 | 4 | 10,419,465  | 10,419,465  | 3 | 0 | 3 | 1 |
| Case 2 | 4 | 10,424,323  | 11,267,586  | 2 | 0 | 2 | 1 |
| Case 2 | 4 | 11,273,101  | 11,674,661  | 3 | 0 | 3 | 1 |
| Case 2 | 4 | 11,677,334  | 13,600,910  | 2 | 0 | 2 | 1 |
| Case 2 | 4 | 13,600,953  | 13,603,200  | 3 | 0 | 3 | 1 |
| Case 2 | 4 | 13,603,373  | 15,982,480  | 2 | 0 | 2 | 1 |
| Case 2 | 4 | 15,983,317  | 16,531,797  | 3 | 0 | 3 | 1 |
| Case 2 | 4 | 16,533,376  | 16,650,090  | 2 | 0 | 2 | 1 |
| Case 2 | 4 | 16,656,578  | 16,801,041  | 3 | 0 | 3 | 1 |
| Case 2 | 4 | 16,822,918  | 24,353,666  | 2 | 0 | 2 | 1 |
| Case 2 | 4 | 24,358,657  | 24,489,441  | 3 | 0 | 3 | 1 |
| Case 2 | 4 | 24,493,051  | 24,886,099  | 2 | 0 | 2 | 1 |

|        |   |             |             |   |   |   |   |
|--------|---|-------------|-------------|---|---|---|---|
| Case 2 | 4 | 24,891,384  | 25,114,664  | 3 | 0 | 3 | 1 |
| Case 2 | 4 | 25,119,575  | 25,571,044  | 2 | 0 | 2 | 1 |
| Case 2 | 4 | 25,575,537  | 25,676,167  | 3 | 0 | 3 | 1 |
| Case 2 | 4 | 25,676,253  | 25,729,059  | 2 | 0 | 2 | 1 |
| Case 2 | 4 | 25,730,546  | 26,163,108  | 3 | 0 | 3 | 1 |
| Case 2 | 4 | 26,163,751  | 26,457,487  | 2 | 0 | 2 | 1 |
| Case 2 | 4 | 26,460,048  | 26,585,881  | 3 | 0 | 3 | 1 |
| Case 2 | 4 | 26,591,253  | 35,538,439  | 2 | 0 | 2 | 1 |
| Case 2 | 4 | 35,554,589  | 37,592,249  | 4 | 2 | 6 | 0 |
| Case 2 | 4 | 37,592,369  | 39,409,066  | 4 | 1 | 5 | 0 |
| Case 2 | 4 | 39,414,993  | 40,905,726  | 6 | 1 | 7 | 0 |
| Case 2 | 4 | 40,913,247  | 40,913,247  | 2 | 0 | 2 | 1 |
| Case 2 | 4 | 40,916,975  | 41,066,388  | 3 | 0 | 3 | 1 |
| Case 2 | 4 | 41,070,095  | 49,620,898  | 2 | 0 | 2 | 1 |
| Case 2 | 4 | 52,697,856  | 57,173,713  | 2 | 0 | 2 | 1 |
| Case 2 | 4 | 57,173,735  | 57,182,667  | 3 | 0 | 3 | 1 |
| Case 2 | 4 | 57,182,709  | 57,549,528  | 2 | 0 | 2 | 1 |
| Case 2 | 4 | 57,549,583  | 57,786,450  | 3 | 0 | 3 | 1 |
| Case 2 | 4 | 57,791,864  | 57,909,291  | 2 | 0 | 2 | 1 |
| Case 2 | 4 | 57,910,214  | 58,104,571  | 3 | 0 | 3 | 1 |
| Case 2 | 4 | 58,105,295  | 77,357,747  | 2 | 0 | 2 | 1 |
| Case 2 | 4 | 77,359,677  | 77,734,939  | 3 | 0 | 3 | 1 |
| Case 2 | 4 | 77,735,406  | 78,106,441  | 2 | 0 | 2 | 1 |
| Case 2 | 4 | 78,115,334  | 78,346,794  | 3 | 0 | 3 | 1 |
| Case 2 | 4 | 78,349,135  | 91,516,422  | 2 | 0 | 2 | 1 |
| Case 2 | 4 | 91,524,285  | 91,607,363  | 4 | 0 | 4 | 1 |
| Case 2 | 4 | 91,630,043  | 99,387,827  | 2 | 0 | 2 | 1 |
| Case 2 | 4 | 99,392,101  | 99,551,907  | 3 | 0 | 3 | 1 |
| Case 2 | 4 | 99,555,740  | 124,316,684 | 2 | 0 | 2 | 1 |
| Case 2 | 4 | 124,320,924 | 128,023,339 | 3 | 0 | 3 | 1 |
| Case 2 | 4 | 128,046,856 | 155,364,486 | 3 | 1 | 4 | 0 |
| Case 2 | 4 | 155,371,246 | 155,786,387 | 2 | 0 | 2 | 1 |
| Case 2 | 4 | 155,790,646 | 155,867,729 | 4 | 1 | 5 | 0 |
| Case 2 | 4 | 155,886,241 | 159,076,826 | 6 | 1 | 7 | 0 |
| Case 2 | 4 | 159,076,944 | 159,076,944 | 2 | 0 | 2 | 1 |
| Case 2 | 4 | 159,076,972 | 160,609,723 | 5 | 1 | 6 | 0 |
| Case 2 | 4 | 160,628,006 | 169,419,690 | 1 | 1 | 2 | 0 |
| Case 2 | 4 | 169,419,849 | 169,439,902 | 2 | 1 | 3 | 0 |
| Case 2 | 4 | 169,448,628 | 171,163,569 | 1 | 1 | 2 | 0 |
| Case 2 | 4 | 171,167,671 | 171,193,885 | 2 | 1 | 3 | 0 |
| Case 2 | 4 | 171,203,364 | 183,709,536 | 1 | 1 | 2 | 0 |
| Case 2 | 4 | 183,709,842 | 183,849,605 | 2 | 1 | 3 | 0 |
| Case 2 | 4 | 183,850,395 | 185,311,570 | 1 | 1 | 2 | 0 |
| Case 2 | 4 | 185,312,355 | 185,496,578 | 2 | 1 | 3 | 0 |
| Case 2 | 4 | 185,510,238 | 185,804,364 | 1 | 1 | 2 | 0 |
| Case 2 | 4 | 185,804,494 | 185,979,298 | 2 | 1 | 3 | 0 |
| Case 2 | 4 | 185,981,436 | 187,390,861 | 1 | 1 | 2 | 0 |
| Case 2 | 4 | 187,391,215 | 187,521,168 | 2 | 1 | 3 | 0 |
| Case 2 | 4 | 187,521,435 | 187,538,330 | 1 | 1 | 2 | 0 |
| Case 2 | 4 | 187,538,942 | 187,549,473 | 2 | 1 | 3 | 0 |
| Case 2 | 4 | 187,549,725 | 190,963,766 | 1 | 1 | 2 | 0 |
| Case 2 | 5 | 38,139      | 7,909,907   | 5 | 0 | 5 | 1 |
| Case 2 | 5 | 7,911,043   | 8,189,299   | 6 | 0 | 6 | 1 |
| Case 2 | 5 | 8,189,392   | 11,548,050  | 5 | 0 | 5 | 1 |
| Case 2 | 5 | 11,548,147  | 13,604,919  | 6 | 0 | 6 | 1 |
| Case 2 | 5 | 13,604,996  | 13,876,926  | 5 | 0 | 5 | 1 |
| Case 2 | 5 | 13,878,843  | 14,360,436  | 6 | 0 | 6 | 1 |
| Case 2 | 5 | 14,363,446  | 14,509,966  | 5 | 0 | 5 | 1 |
| Case 2 | 5 | 14,514,308  | 16,605,738  | 6 | 0 | 6 | 1 |
| Case 2 | 5 | 16,607,196  | 16,713,465  | 5 | 0 | 5 | 1 |
| Case 2 | 5 | 16,721,306  | 31,511,467  | 6 | 0 | 6 | 1 |



|        |   |             |             |   |   |   |   |
|--------|---|-------------|-------------|---|---|---|---|
| Case 2 | 5 | 31,514,231  | 32,145,957  | 5 | 0 | 5 | 1 |
| Case 2 | 5 | 32,146,492  | 33,831,305  | 6 | 0 | 6 | 1 |
| Case 2 | 5 | 33,831,355  | 33,988,445  | 5 | 0 | 5 | 1 |
| Case 2 | 5 | 33,988,581  | 34,819,280  | 6 | 0 | 6 | 1 |
| Case 2 | 5 | 34,821,825  | 35,097,169  | 5 | 0 | 5 | 1 |
| Case 2 | 5 | 35,101,178  | 37,814,148  | 6 | 0 | 6 | 1 |
| Case 2 | 5 | 37,815,756  | 38,496,637  | 5 | 0 | 5 | 1 |
| Case 2 | 5 | 38,506,031  | 39,320,143  | 6 | 0 | 6 | 1 |
| Case 2 | 5 | 39,325,342  | 39,397,132  | 5 | 0 | 5 | 1 |
| Case 2 | 5 | 39,415,860  | 40,386,555  | 6 | 0 | 6 | 1 |
| Case 2 | 5 | 40,389,129  | 40,445,681  | 5 | 0 | 5 | 1 |
| Case 2 | 5 | 40,456,902  | 40,456,902  | 6 | 0 | 6 | 1 |
| Case 2 | 5 | 40,467,272  | 46,399,093  | 7 | 0 | 7 | 1 |
| Case 2 | 5 | 49,457,282  | 58,296,165  | 3 | 0 | 3 | 1 |
| Case 2 | 5 | 58,301,611  | 58,301,611  | 2 | 0 | 2 | 1 |
| Case 2 | 5 | 58,313,560  | 58,511,501  | 0 | 0 | 0 | 0 |
| Case 2 | 5 | 58,515,481  | 58,515,481  | 2 | 0 | 2 | 1 |
| Case 2 | 5 | 58,520,735  | 70,805,683  | 3 | 0 | 3 | 1 |
| Case 2 | 5 | 70,805,962  | 70,848,961  | 2 | 0 | 2 | 1 |
| Case 2 | 5 | 70,848,983  | 79,704,614  | 3 | 0 | 3 | 1 |
| Case 2 | 5 | 79,721,720  | 79,773,132  | 2 | 0 | 2 | 1 |
| Case 2 | 5 | 79,774,171  | 84,192,194  | 3 | 0 | 3 | 1 |
| Case 2 | 5 | 84,195,407  | 84,863,244  | 2 | 0 | 2 | 1 |
| Case 2 | 5 | 84,868,447  | 88,196,003  | 3 | 0 | 3 | 1 |
| Case 2 | 5 | 88,215,594  | 88,416,354  | 2 | 0 | 2 | 1 |
| Case 2 | 5 | 88,421,363  | 88,746,405  | 3 | 0 | 3 | 1 |
| Case 2 | 5 | 88,747,297  | 88,984,629  | 2 | 0 | 2 | 1 |
| Case 2 | 5 | 88,994,840  | 98,192,095  | 3 | 0 | 3 | 1 |
| Case 2 | 5 | 98,192,154  | 98,258,933  | 2 | 0 | 2 | 1 |
| Case 2 | 5 | 98,267,115  | 100,065,714 | 3 | 0 | 3 | 1 |
| Case 2 | 5 | 100,071,459 | 101,035,851 | 2 | 0 | 2 | 1 |
| Case 2 | 5 | 101,039,904 | 103,761,407 | 3 | 0 | 3 | 1 |
| Case 2 | 5 | 103,766,994 | 105,135,112 | 2 | 0 | 2 | 1 |
| Case 2 | 5 | 105,139,420 | 108,698,712 | 3 | 0 | 3 | 1 |
| Case 2 | 5 | 108,704,336 | 108,911,162 | 2 | 0 | 2 | 1 |
| Case 2 | 5 | 108,921,039 | 109,798,056 | 3 | 0 | 3 | 1 |
| Case 2 | 5 | 109,802,199 | 109,974,026 | 2 | 0 | 2 | 1 |
| Case 2 | 5 | 109,974,582 | 128,311,685 | 3 | 0 | 3 | 1 |
| Case 2 | 5 | 128,313,024 | 128,368,883 | 2 | 0 | 2 | 1 |
| Case 2 | 5 | 128,373,968 | 151,921,873 | 3 | 0 | 3 | 1 |
| Case 2 | 5 | 151,929,836 | 153,633,682 | 4 | 0 | 4 | 1 |
| Case 2 | 5 | 153,638,793 | 164,071,553 | 3 | 0 | 3 | 1 |
| Case 2 | 5 | 164,088,373 | 164,360,499 | 2 | 0 | 2 | 1 |
| Case 2 | 5 | 164,368,235 | 180,693,127 | 3 | 0 | 3 | 1 |
| Case 2 | 6 | 108,666     | 58,752,089  | 3 | 1 | 4 | 0 |
| Case 2 | 6 | 61,891,118  | 170,980,171 | 3 | 1 | 4 | 0 |
| Case 2 | 7 | 44,935      | 8,044,483   | 2 | 1 | 3 | 0 |
| Case 2 | 7 | 8,055,664   | 8,113,312   | 1 | 1 | 2 | 0 |
| Case 2 | 7 | 8,113,751   | 8,802,582   | 2 | 1 | 3 | 0 |
| Case 2 | 7 | 8,806,028   | 8,968,422   | 1 | 1 | 2 | 0 |
| Case 2 | 7 | 8,968,569   | 9,154,681   | 2 | 1 | 3 | 0 |
| Case 2 | 7 | 9,157,560   | 9,387,898   | 1 | 1 | 2 | 0 |
| Case 2 | 7 | 9,388,118   | 13,567,908  | 2 | 1 | 3 | 0 |
| Case 2 | 7 | 13,569,530  | 33,384,197  | 3 | 0 | 3 | 1 |
| Case 2 | 7 | 33,384,201  | 33,914,560  | 4 | 0 | 4 | 1 |
| Case 2 | 7 | 33,924,423  | 38,298,285  | 3 | 0 | 3 | 1 |
| Case 2 | 7 | 38,313,248  | 38,364,289  | 3 | 1 | 4 | 0 |
| Case 2 | 7 | 38,367,259  | 46,242,583  | 3 | 0 | 3 | 1 |
| Case 2 | 7 | 46,246,580  | 48,984,046  | 4 | 0 | 4 | 1 |
| Case 2 | 7 | 48,985,673  | 49,604,838  | 3 | 0 | 3 | 1 |
| Case 2 | 7 | 49,613,268  | 50,057,870  | 3 | 1 | 4 | 0 |

|        |   |             |             |   |   |   |   |
|--------|---|-------------|-------------|---|---|---|---|
| Case 2 | 7 | 50,070,873  | 51,208,903  | 2 | 1 | 3 | 0 |
| Case 2 | 7 | 51,213,607  | 51,703,325  | 2 | 2 | 4 | 0 |
| Case 2 | 7 | 51,706,830  | 58,019,061  | 2 | 1 | 3 | 0 |
| Case 2 | 7 | 61,056,053  | 70,434,205  | 2 | 1 | 3 | 0 |
| Case 2 | 7 | 70,449,956  | 70,788,156  | 2 | 0 | 2 | 1 |
| Case 2 | 7 | 70,798,935  | 77,558,607  | 2 | 1 | 3 | 0 |
| Case 2 | 7 | 77,562,294  | 77,711,083  | 2 | 2 | 4 | 0 |
| Case 2 | 7 | 77,711,290  | 94,941,415  | 2 | 1 | 3 | 0 |
| Case 2 | 7 | 94,941,820  | 95,029,767  | 2 | 2 | 4 | 0 |
| Case 2 | 7 | 95,030,632  | 121,356,943 | 2 | 1 | 3 | 0 |
| Case 2 | 7 | 121,373,997 | 128,494,257 | 3 | 0 | 3 | 1 |
| Case 2 | 7 | 128,494,730 | 128,597,587 | 3 | 1 | 4 | 0 |
| Case 2 | 7 | 128,597,804 | 134,896,167 | 2 | 1 | 3 | 0 |
| Case 2 | 7 | 134,913,049 | 135,043,388 | 2 | 2 | 4 | 0 |
| Case 2 | 7 | 135,045,786 | 155,657,469 | 2 | 1 | 3 | 0 |
| Case 2 | 7 | 155,657,480 | 155,825,162 | 2 | 2 | 4 | 0 |
| Case 2 | 7 | 155,826,004 | 156,772,542 | 2 | 1 | 3 | 0 |
| Case 2 | 7 | 156,778,615 | 156,883,839 | 2 | 2 | 4 | 0 |
| Case 2 | 7 | 156,885,979 | 159,119,486 | 2 | 1 | 3 | 0 |
| Case 2 | 8 | 164,984     | 2,150,224   | 5 | 1 | 6 | 0 |
| Case 2 | 8 | 2,151,798   | 2,158,537   | 2 | 0 | 2 | 1 |
| Case 2 | 8 | 2,163,403   | 2,289,839   | 4 | 1 | 5 | 0 |
| Case 2 | 8 | 2,290,039   | 5,217,751   | 6 | 1 | 7 | 0 |
| Case 2 | 8 | 5,218,198   | 5,218,198   | 2 | 0 | 2 | 1 |
| Case 2 | 8 | 5,220,317   | 11,141,330  | 5 | 1 | 6 | 0 |
| Case 2 | 8 | 11,142,437  | 12,181,277  | 7 | 0 | 7 | 1 |
| Case 2 | 8 | 12,483,094  | 12,511,866  | 3 | 0 | 3 | 1 |
| Case 2 | 8 | 12,545,638  | 13,625,816  | 3 | 1 | 4 | 0 |
| Case 2 | 8 | 13,628,490  | 13,937,395  | 4 | 1 | 5 | 0 |
| Case 2 | 8 | 13,938,197  | 14,090,481  | 3 | 1 | 4 | 0 |
| Case 2 | 8 | 14,091,774  | 14,492,121  | 4 | 1 | 5 | 0 |
| Case 2 | 8 | 14,494,946  | 43,791,691  | 3 | 1 | 4 | 0 |
| Case 2 | 8 | 46,886,735  | 47,060,602  | 3 | 1 | 4 | 0 |
| Case 2 | 8 | 47,060,977  | 79,262,741  | 4 | 1 | 5 | 0 |
| Case 2 | 8 | 79,270,433  | 79,707,140  | 3 | 1 | 4 | 0 |
| Case 2 | 8 | 79,709,926  | 79,871,922  | 4 | 1 | 5 | 0 |
| Case 2 | 8 | 79,873,935  | 80,364,499  | 3 | 1 | 4 | 0 |
| Case 2 | 8 | 80,380,011  | 139,614,436 | 4 | 1 | 5 | 0 |
| Case 2 | 8 | 139,620,049 | 139,778,880 | 3 | 1 | 4 | 0 |
| Case 2 | 8 | 139,781,866 | 144,124,609 | 4 | 1 | 5 | 0 |
| Case 2 | 8 | 144,126,087 | 144,416,928 | 3 | 1 | 4 | 0 |
| Case 2 | 8 | 144,420,930 | 144,920,886 | 4 | 1 | 5 | 0 |
| Case 2 | 8 | 144,927,272 | 144,943,196 | 3 | 1 | 4 | 0 |
| Case 2 | 8 | 144,943,223 | 145,919,126 | 4 | 1 | 5 | 0 |
| Case 2 | 8 | 145,926,632 | 146,293,414 | 3 | 1 | 4 | 0 |
| Case 2 | 9 | 46,587      | 4,939,569   | 2 | 1 | 3 | 0 |
| Case 2 | 9 | 4,939,850   | 5,339,664   | 2 | 0 | 2 | 1 |
| Case 2 | 9 | 5,339,688   | 8,388,220   | 2 | 1 | 3 | 0 |
| Case 2 | 9 | 8,390,467   | 8,423,755   | 1 | 1 | 2 | 0 |
| Case 2 | 9 | 8,428,249   | 9,043,421   | 2 | 1 | 3 | 0 |
| Case 2 | 9 | 9,045,011   | 9,066,755   | 2 | 0 | 2 | 1 |
| Case 2 | 9 | 9,069,839   | 9,632,921   | 2 | 1 | 3 | 0 |
| Case 2 | 9 | 9,638,432   | 9,862,282   | 2 | 0 | 2 | 1 |
| Case 2 | 9 | 9,863,227   | 10,057,995  | 2 | 1 | 3 | 0 |
| Case 2 | 9 | 10,061,106  | 10,240,428  | 2 | 0 | 2 | 1 |
| Case 2 | 9 | 10,246,635  | 10,447,115  | 2 | 1 | 3 | 0 |
| Case 2 | 9 | 10,448,624  | 10,530,953  | 2 | 0 | 2 | 1 |
| Case 2 | 9 | 10,531,641  | 10,928,314  | 2 | 1 | 3 | 0 |
| Case 2 | 9 | 10,928,755  | 11,075,772  | 2 | 0 | 2 | 1 |
| Case 2 | 9 | 11,083,426  | 11,967,114  | 2 | 1 | 3 | 0 |
| Case 2 | 9 | 11,969,789  | 12,177,583  | 2 | 0 | 2 | 1 |

|        |    |             |             |   |   |   |   |
|--------|----|-------------|-------------|---|---|---|---|
| Case 2 | 9  | 12,178,059  | 17,147,702  | 2 | 1 | 3 | 0 |
| Case 2 | 9  | 17,158,245  | 17,524,038  | 2 | 0 | 2 | 1 |
| Case 2 | 9  | 17,531,968  | 23,226,243  | 2 | 1 | 3 | 0 |
| Case 2 | 9  | 23,231,298  | 23,407,386  | 1 | 1 | 2 | 0 |
| Case 2 | 9  | 23,407,435  | 24,502,737  | 2 | 1 | 3 | 0 |
| Case 2 | 9  | 24,505,123  | 25,539,330  | 2 | 0 | 2 | 1 |
| Case 2 | 9  | 25,540,603  | 26,978,259  | 2 | 1 | 3 | 0 |
| Case 2 | 9  | 26,984,277  | 26,984,277  | 2 | 0 | 2 | 1 |
| Case 2 | 9  | 26,993,755  | 27,066,281  | 1 | 1 | 2 | 0 |
| Case 2 | 9  | 27,074,233  | 28,799,706  | 2 | 1 | 3 | 0 |
| Case 2 | 9  | 28,801,138  | 29,032,248  | 1 | 1 | 2 | 0 |
| Case 2 | 9  | 29,042,229  | 29,297,803  | 2 | 1 | 3 | 0 |
| Case 2 | 9  | 29,302,701  | 29,350,462  | 2 | 0 | 2 | 1 |
| Case 2 | 9  | 29,350,850  | 29,448,530  | 2 | 1 | 3 | 0 |
| Case 2 | 9  | 29,457,656  | 29,626,137  | 2 | 0 | 2 | 1 |
| Case 2 | 9  | 29,630,811  | 29,796,667  | 2 | 1 | 3 | 0 |
| Case 2 | 9  | 29,800,646  | 30,915,973  | 2 | 0 | 2 | 1 |
| Case 2 | 9  | 30,918,764  | 46,944,322  | 2 | 1 | 3 | 0 |
| Case 2 | 9  | 65,629,772  | 79,827,894  | 2 | 1 | 3 | 0 |
| Case 2 | 9  | 79,829,278  | 80,010,025  | 2 | 0 | 2 | 1 |
| Case 2 | 9  | 80,014,376  | 83,333,731  | 2 | 1 | 3 | 0 |
| Case 2 | 9  | 83,340,723  | 83,429,265  | 2 | 0 | 2 | 1 |
| Case 2 | 9  | 83,429,615  | 99,521,123  | 2 | 1 | 3 | 0 |
| Case 2 | 9  | 99,521,136  | 99,625,063  | 1 | 1 | 2 | 0 |
| Case 2 | 9  | 99,651,444  | 105,704,669 | 2 | 1 | 3 | 0 |
| Case 2 | 9  | 105,706,469 | 105,767,437 | 2 | 0 | 2 | 1 |
| Case 2 | 9  | 105,767,464 | 134,247,571 | 2 | 1 | 3 | 0 |
| Case 2 | 9  | 134,254,451 | 141,066,491 | 3 | 0 | 3 | 1 |
| Case 2 | 10 | 98,087      | 39,097,912  | 3 | 1 | 4 | 0 |
| Case 2 | 10 | 42,436,301  | 135,477,883 | 3 | 1 | 4 | 0 |
| Case 2 | 11 | 193,146     | 2,076,043   | 2 | 1 | 3 | 0 |
| Case 2 | 11 | 2,087,220   | 2,170,548   | 3 | 1 | 4 | 0 |
| Case 2 | 11 | 2,171,601   | 3,741,989   | 2 | 1 | 3 | 0 |
| Case 2 | 11 | 3,742,758   | 5,080,296   | 3 | 0 | 3 | 1 |
| Case 2 | 11 | 5,080,337   | 6,293,182   | 2 | 1 | 3 | 0 |
| Case 2 | 11 | 6,293,210   | 6,394,176   | 3 | 1 | 4 | 0 |
| Case 2 | 11 | 6,397,336   | 11,479,866  | 2 | 1 | 3 | 0 |
| Case 2 | 11 | 11,482,863  | 11,592,911  | 3 | 1 | 4 | 0 |
| Case 2 | 11 | 11,593,110  | 15,452,247  | 2 | 1 | 3 | 0 |
| Case 2 | 11 | 15,455,777  | 15,799,460  | 3 | 1 | 4 | 0 |
| Case 2 | 11 | 15,801,938  | 15,972,672  | 3 | 0 | 3 | 1 |
| Case 2 | 11 | 15,977,337  | 16,040,700  | 3 | 1 | 4 | 0 |
| Case 2 | 11 | 16,041,305  | 18,866,999  | 2 | 1 | 3 | 0 |
| Case 2 | 11 | 18,869,581  | 19,044,093  | 3 | 1 | 4 | 0 |
| Case 2 | 11 | 19,044,777  | 19,314,614  | 3 | 0 | 3 | 1 |
| Case 2 | 11 | 19,323,503  | 19,401,373  | 3 | 1 | 4 | 0 |
| Case 2 | 11 | 19,405,356  | 20,443,875  | 2 | 1 | 3 | 0 |
| Case 2 | 11 | 20,447,419  | 20,522,915  | 2 | 0 | 2 | 1 |
| Case 2 | 11 | 20,529,886  | 23,559,112  | 2 | 1 | 3 | 0 |
| Case 2 | 11 | 23,564,329  | 23,833,286  | 2 | 0 | 2 | 1 |
| Case 2 | 11 | 23,841,971  | 27,148,966  | 2 | 1 | 3 | 0 |
| Case 2 | 11 | 27,154,853  | 27,355,031  | 3 | 1 | 4 | 0 |
| Case 2 | 11 | 27,356,095  | 27,444,517  | 3 | 0 | 3 | 1 |
| Case 2 | 11 | 27,451,759  | 27,665,543  | 3 | 1 | 4 | 0 |
| Case 2 | 11 | 27,665,788  | 30,916,822  | 2 | 1 | 3 | 0 |
| Case 2 | 11 | 30,918,425  | 31,671,678  | 2 | 0 | 2 | 1 |
| Case 2 | 11 | 31,690,224  | 37,688,427  | 2 | 1 | 3 | 0 |
| Case 2 | 11 | 37,688,849  | 37,891,672  | 2 | 0 | 2 | 1 |
| Case 2 | 11 | 37,899,086  | 39,033,555  | 3 | 0 | 3 | 1 |
| Case 2 | 11 | 39,043,546  | 50,468,978  | 2 | 1 | 3 | 0 |
| Case 2 | 11 | 50,476,268  | 51,379,204  | 2 | 0 | 2 | 1 |

|        |    |             |             |   |   |   |   |
|--------|----|-------------|-------------|---|---|---|---|
| Case 2 | 11 | 51,383,999  | 51,591,253  | 2 | 1 | 3 | 0 |
| Case 2 | 11 | 54,794,237  | 58,605,832  | 2 | 1 | 3 | 0 |
| Case 2 | 11 | 58,610,656  | 60,562,641  | 3 | 0 | 3 | 1 |
| Case 2 | 11 | 60,562,975  | 62,656,022  | 2 | 1 | 3 | 0 |
| Case 2 | 11 | 62,656,504  | 62,794,074  | 3 | 1 | 4 | 0 |
| Case 2 | 11 | 62,801,148  | 69,596,523  | 2 | 1 | 3 | 0 |
| Case 2 | 11 | 69,597,131  | 69,838,584  | 3 | 1 | 4 | 0 |
| Case 2 | 11 | 69,839,305  | 70,829,969  | 2 | 1 | 3 | 0 |
| Case 2 | 11 | 70,836,467  | 71,110,248  | 3 | 1 | 4 | 0 |
| Case 2 | 11 | 71,112,721  | 75,155,503  | 2 | 1 | 3 | 0 |
| Case 2 | 11 | 75,155,743  | 75,276,178  | 3 | 1 | 4 | 0 |
| Case 2 | 11 | 75,277,491  | 79,018,805  | 2 | 1 | 3 | 0 |
| Case 2 | 11 | 79,020,289  | 79,165,928  | 3 | 1 | 4 | 0 |
| Case 2 | 11 | 79,167,107  | 84,735,715  | 2 | 1 | 3 | 0 |
| Case 2 | 11 | 84,741,129  | 85,370,482  | 3 | 0 | 3 | 1 |
| Case 2 | 11 | 85,373,668  | 92,868,270  | 2 | 1 | 3 | 0 |
| Case 2 | 11 | 92,881,044  | 92,961,333  | 1 | 1 | 2 | 0 |
| Case 2 | 11 | 92,968,895  | 95,148,826  | 2 | 1 | 3 | 0 |
| Case 2 | 11 | 95,154,173  | 95,497,231  | 3 | 1 | 4 | 0 |
| Case 2 | 11 | 95,502,106  | 95,643,002  | 3 | 0 | 3 | 1 |
| Case 2 | 11 | 95,648,242  | 95,712,644  | 3 | 1 | 4 | 0 |
| Case 2 | 11 | 95,712,720  | 102,988,361 | 2 | 1 | 3 | 0 |
| Case 2 | 11 | 102,988,504 | 103,530,554 | 3 | 0 | 3 | 1 |
| Case 2 | 11 | 103,538,849 | 106,330,810 | 2 | 1 | 3 | 0 |
| Case 2 | 11 | 106,332,385 | 106,886,058 | 3 | 0 | 3 | 1 |
| Case 2 | 11 | 106,892,204 | 107,185,075 | 3 | 1 | 4 | 0 |
| Case 2 | 11 | 107,186,896 | 117,913,074 | 2 | 1 | 3 | 0 |
| Case 2 | 11 | 117,915,055 | 118,037,625 | 3 | 1 | 4 | 0 |
| Case 2 | 11 | 118,037,748 | 118,535,185 | 2 | 1 | 3 | 0 |
| Case 2 | 11 | 118,538,187 | 118,610,629 | 3 | 1 | 4 | 0 |
| Case 2 | 11 | 118,611,781 | 122,970,265 | 2 | 1 | 3 | 0 |
| Case 2 | 11 | 122,971,458 | 123,026,014 | 3 | 1 | 4 | 0 |
| Case 2 | 11 | 123,027,157 | 126,283,492 | 2 | 1 | 3 | 0 |
| Case 2 | 11 | 126,283,542 | 126,521,978 | 3 | 1 | 4 | 0 |
| Case 2 | 11 | 126,522,029 | 133,478,658 | 2 | 1 | 3 | 0 |
| Case 2 | 11 | 133,483,146 | 133,776,948 | 3 | 1 | 4 | 0 |
| Case 2 | 11 | 133,778,102 | 134,934,063 | 2 | 1 | 3 | 0 |
| Case 2 | 12 | 191,619     | 12,393,895  | 2 | 1 | 3 | 0 |
| Case 2 | 12 | 12,396,130  | 12,480,088  | 2 | 2 | 4 | 0 |
| Case 2 | 12 | 12,482,448  | 12,730,537  | 2 | 1 | 3 | 0 |
| Case 2 | 12 | 12,732,360  | 12,956,710  | 2 | 2 | 4 | 0 |
| Case 2 | 12 | 12,959,062  | 13,103,014  | 2 | 1 | 3 | 0 |
| Case 2 | 12 | 13,103,266  | 13,150,687  | 2 | 2 | 4 | 0 |
| Case 2 | 12 | 13,155,339  | 31,005,273  | 2 | 1 | 3 | 0 |
| Case 2 | 12 | 31,005,365  | 31,156,501  | 2 | 2 | 4 | 0 |
| Case 2 | 12 | 31,158,519  | 34,853,011  | 2 | 1 | 3 | 0 |
| Case 2 | 12 | 37,876,400  | 52,164,027  | 2 | 1 | 3 | 0 |
| Case 2 | 12 | 52,171,326  | 52,554,147  | 2 | 2 | 4 | 0 |
| Case 2 | 12 | 52,554,468  | 53,204,757  | 2 | 1 | 3 | 0 |
| Case 2 | 12 | 53,205,566  | 53,500,145  | 2 | 2 | 4 | 0 |
| Case 2 | 12 | 53,505,327  | 84,178,113  | 2 | 1 | 3 | 0 |
| Case 2 | 12 | 84,190,218  | 84,210,234  | 2 | 0 | 2 | 1 |
| Case 2 | 12 | 84,215,246  | 85,423,743  | 2 | 1 | 3 | 0 |
| Case 2 | 12 | 85,427,691  | 85,450,243  | 1 | 1 | 2 | 0 |
| Case 2 | 12 | 85,450,291  | 104,139,020 | 2 | 1 | 3 | 0 |
| Case 2 | 12 | 104,139,034 | 104,379,422 | 2 | 2 | 4 | 0 |
| Case 2 | 12 | 104,380,734 | 105,600,902 | 2 | 1 | 3 | 0 |
| Case 2 | 12 | 105,600,935 | 105,855,305 | 2 | 2 | 4 | 0 |
| Case 2 | 12 | 105,856,679 | 108,701,557 | 2 | 1 | 3 | 0 |
| Case 2 | 12 | 108,702,560 | 108,879,906 | 2 | 2 | 4 | 0 |
| Case 2 | 12 | 108,883,621 | 113,031,474 | 2 | 1 | 3 | 0 |

|        |    |             |             |   |   |   |   |
|--------|----|-------------|-------------|---|---|---|---|
| Case 2 | 12 | 113,036,817 | 113,285,551 | 2 | 2 | 4 | 0 |
| Case 2 | 12 | 113,285,626 | 114,083,833 | 2 | 1 | 3 | 0 |
| Case 2 | 12 | 114,085,798 | 114,135,799 | 2 | 2 | 4 | 0 |
| Case 2 | 12 | 114,140,619 | 114,427,632 | 2 | 1 | 3 | 0 |
| Case 2 | 12 | 114,433,636 | 114,641,793 | 2 | 2 | 4 | 0 |
| Case 2 | 12 | 114,645,356 | 124,654,364 | 2 | 1 | 3 | 0 |
| Case 2 | 12 | 124,655,485 | 125,092,296 | 2 | 2 | 4 | 0 |
| Case 2 | 12 | 125,093,430 | 125,968,891 | 2 | 1 | 3 | 0 |
| Case 2 | 12 | 125,973,509 | 126,071,206 | 2 | 2 | 4 | 0 |
| Case 2 | 12 | 126,071,667 | 127,744,939 | 2 | 1 | 3 | 0 |
| Case 2 | 12 | 127,752,151 | 128,145,564 | 2 | 2 | 4 | 0 |
| Case 2 | 12 | 128,146,589 | 130,496,399 | 2 | 1 | 3 | 0 |
| Case 2 | 12 | 130,496,496 | 130,648,380 | 2 | 2 | 4 | 0 |
| Case 2 | 12 | 130,649,160 | 131,849,823 | 2 | 1 | 3 | 0 |
| Case 2 | 12 | 131,854,499 | 132,175,484 | 2 | 2 | 4 | 0 |
| Case 2 | 12 | 132,176,454 | 133,810,935 | 2 | 1 | 3 | 0 |
| Case 2 | 13 | 19,058,717  | 20,498,817  | 2 | 1 | 3 | 0 |
| Case 2 | 13 | 20,507,957  | 21,562,259  | 2 | 2 | 4 | 0 |
| Case 2 | 13 | 21,562,267  | 21,612,791  | 2 | 1 | 3 | 0 |
| Case 2 | 13 | 21,620,085  | 22,105,533  | 2 | 0 | 2 | 1 |
| Case 2 | 13 | 22,115,822  | 22,288,548  | 2 | 1 | 3 | 0 |
| Case 2 | 13 | 22,290,101  | 23,766,487  | 2 | 2 | 4 | 0 |
| Case 2 | 13 | 23,766,935  | 23,936,013  | 2 | 1 | 3 | 0 |
| Case 2 | 13 | 23,939,323  | 25,344,731  | 2 | 2 | 4 | 0 |
| Case 2 | 13 | 25,345,693  | 25,487,096  | 2 | 1 | 3 | 0 |
| Case 2 | 13 | 25,491,009  | 26,592,891  | 2 | 2 | 4 | 0 |
| Case 2 | 13 | 26,593,106  | 27,021,015  | 2 | 1 | 3 | 0 |
| Case 2 | 13 | 27,021,533  | 32,845,230  | 2 | 2 | 4 | 0 |
| Case 2 | 13 | 32,848,991  | 33,018,228  | 2 | 1 | 3 | 0 |
| Case 2 | 13 | 33,030,098  | 44,834,104  | 2 | 2 | 4 | 0 |
| Case 2 | 13 | 44,835,951  | 50,589,978  | 2 | 1 | 3 | 0 |
| Case 2 | 13 | 50,591,480  | 50,806,640  | 3 | 0 | 3 | 1 |
| Case 2 | 13 | 50,811,155  | 99,065,955  | 2 | 1 | 3 | 0 |
| Case 2 | 13 | 99,066,201  | 99,302,988  | 2 | 2 | 4 | 0 |
| Case 2 | 13 | 99,303,309  | 99,371,556  | 2 | 1 | 3 | 0 |
| Case 2 | 13 | 99,372,361  | 99,449,717  | 2 | 2 | 4 | 0 |
| Case 2 | 13 | 99,449,755  | 111,123,132 | 2 | 1 | 3 | 0 |
| Case 2 | 13 | 111,123,190 | 111,231,833 | 2 | 2 | 4 | 0 |
| Case 2 | 13 | 111,235,729 | 112,250,110 | 2 | 1 | 3 | 0 |
| Case 2 | 13 | 112,250,239 | 112,570,992 | 2 | 2 | 4 | 0 |
| Case 2 | 13 | 112,571,308 | 114,817,751 | 2 | 1 | 3 | 0 |
| Case 2 | 13 | 114,824,885 | 114,974,695 | 2 | 2 | 4 | 0 |
| Case 2 | 13 | 114,977,582 | 115,103,529 | 2 | 1 | 3 | 0 |
| Case 2 | 14 | 19,280,733  | 22,612,060  | 2 | 1 | 3 | 0 |
| Case 2 | 14 | 22,612,288  | 22,970,327  | 2 | 2 | 4 | 0 |
| Case 2 | 14 | 22,972,815  | 26,229,620  | 2 | 1 | 3 | 0 |
| Case 2 | 14 | 26,235,470  | 30,383,477  | 1 | 1 | 2 | 0 |
| Case 2 | 14 | 30,385,811  | 32,913,332  | 2 | 1 | 3 | 0 |
| Case 2 | 14 | 32,918,859  | 32,983,694  | 1 | 1 | 2 | 0 |
| Case 2 | 14 | 33,004,641  | 36,065,959  | 2 | 1 | 3 | 0 |
| Case 2 | 14 | 36,093,840  | 36,345,272  | 1 | 1 | 2 | 0 |
| Case 2 | 14 | 36,346,552  | 37,620,754  | 2 | 1 | 3 | 0 |
| Case 2 | 14 | 37,630,699  | 38,005,128  | 1 | 1 | 2 | 0 |
| Case 2 | 14 | 38,013,787  | 39,650,924  | 2 | 1 | 3 | 0 |
| Case 2 | 14 | 39,651,193  | 39,793,554  | 1 | 1 | 2 | 0 |
| Case 2 | 14 | 39,796,221  | 40,410,279  | 2 | 1 | 3 | 0 |
| Case 2 | 14 | 40,425,105  | 44,975,071  | 1 | 1 | 2 | 0 |
| Case 2 | 14 | 44,975,089  | 45,506,857  | 2 | 1 | 3 | 0 |
| Case 2 | 14 | 45,512,923  | 45,590,822  | 1 | 1 | 2 | 0 |
| Case 2 | 14 | 45,604,404  | 45,606,290  | 2 | 1 | 3 | 0 |
| Case 2 | 14 | 45,606,301  | 45,696,037  | 1 | 1 | 2 | 0 |

|        |    |            |             |   |   |   |   |
|--------|----|------------|-------------|---|---|---|---|
| Case 2 | 14 | 45,696,913 | 46,474,288  | 2 | 1 | 3 | 0 |
| Case 2 | 14 | 46,474,336 | 47,858,972  | 1 | 1 | 2 | 0 |
| Case 2 | 14 | 47,859,651 | 48,305,099  | 2 | 1 | 3 | 0 |
| Case 2 | 14 | 48,306,780 | 49,464,407  | 1 | 1 | 2 | 0 |
| Case 2 | 14 | 49,467,802 | 49,957,271  | 2 | 1 | 3 | 0 |
| Case 2 | 14 | 49,957,353 | 50,100,886  | 3 | 0 | 3 | 1 |
| Case 2 | 14 | 50,101,682 | 50,216,947  | 1 | 1 | 2 | 0 |
| Case 2 | 14 | 50,217,746 | 51,052,118  | 2 | 1 | 3 | 0 |
| Case 2 | 14 | 51,054,710 | 51,219,320  | 1 | 1 | 2 | 0 |
| Case 2 | 14 | 51,219,349 | 56,054,354  | 2 | 1 | 3 | 0 |
| Case 2 | 14 | 56,058,049 | 56,166,871  | 1 | 1 | 2 | 0 |
| Case 2 | 14 | 56,173,687 | 57,931,444  | 2 | 1 | 3 | 0 |
| Case 2 | 14 | 57,931,920 | 57,938,260  | 1 | 1 | 2 | 0 |
| Case 2 | 14 | 57,945,301 | 58,669,409  | 2 | 1 | 3 | 0 |
| Case 2 | 14 | 58,669,637 | 58,949,339  | 1 | 1 | 2 | 0 |
| Case 2 | 14 | 58,949,390 | 60,785,724  | 2 | 1 | 3 | 0 |
| Case 2 | 14 | 60,789,176 | 60,951,790  | 1 | 1 | 2 | 0 |
| Case 2 | 14 | 60,952,612 | 74,482,984  | 2 | 1 | 3 | 0 |
| Case 2 | 14 | 74,489,695 | 74,533,575  | 2 | 0 | 2 | 1 |
| Case 2 | 14 | 74,535,660 | 81,156,328  | 2 | 1 | 3 | 0 |
| Case 2 | 14 | 81,160,050 | 81,256,954  | 1 | 1 | 2 | 0 |
| Case 2 | 14 | 81,259,157 | 82,679,437  | 2 | 1 | 3 | 0 |
| Case 2 | 14 | 82,687,831 | 83,245,454  | 1 | 1 | 2 | 0 |
| Case 2 | 14 | 83,253,552 | 83,348,722  | 2 | 1 | 3 | 0 |
| Case 2 | 14 | 83,350,784 | 85,575,816  | 1 | 1 | 2 | 0 |
| Case 2 | 14 | 85,588,257 | 86,456,449  | 2 | 1 | 3 | 0 |
| Case 2 | 14 | 86,457,640 | 87,098,671  | 1 | 1 | 2 | 0 |
| Case 2 | 14 | 87,101,749 | 92,421,275  | 2 | 1 | 3 | 0 |
| Case 2 | 14 | 92,423,309 | 92,499,348  | 1 | 1 | 2 | 0 |
| Case 2 | 14 | 92,503,576 | 96,772,091  | 2 | 1 | 3 | 0 |
| Case 2 | 14 | 96,773,160 | 96,853,454  | 1 | 1 | 2 | 0 |
| Case 2 | 14 | 96,858,572 | 97,075,238  | 2 | 1 | 3 | 0 |
| Case 2 | 14 | 97,075,308 | 97,168,780  | 2 | 2 | 4 | 0 |
| Case 2 | 14 | 97,169,037 | 107,287,663 | 2 | 1 | 3 | 0 |
| Case 2 | 15 | 20,034,919 | 25,430,243  | 2 | 0 | 2 | 1 |
| Case 2 | 15 | 25,432,842 | 25,494,107  | 3 | 0 | 3 | 1 |
| Case 2 | 15 | 25,494,501 | 25,925,095  | 2 | 0 | 2 | 1 |
| Case 2 | 15 | 25,925,195 | 25,962,873  | 2 | 1 | 3 | 0 |
| Case 2 | 15 | 25,963,399 | 28,520,072  | 1 | 1 | 2 | 0 |
| Case 2 | 15 | 28,520,146 | 29,431,821  | 2 | 1 | 3 | 0 |
| Case 2 | 15 | 29,438,477 | 31,527,759  | 1 | 1 | 2 | 0 |
| Case 2 | 15 | 31,528,162 | 32,187,995  | 2 | 1 | 3 | 0 |
| Case 2 | 15 | 32,197,873 | 32,946,561  | 1 | 1 | 2 | 0 |
| Case 2 | 15 | 32,947,806 | 33,096,488  | 2 | 1 | 3 | 0 |
| Case 2 | 15 | 33,101,473 | 33,923,690  | 1 | 1 | 2 | 0 |
| Case 2 | 15 | 33,925,820 | 34,046,635  | 2 | 1 | 3 | 0 |
| Case 2 | 15 | 34,047,474 | 34,624,438  | 1 | 1 | 2 | 0 |
| Case 2 | 15 | 34,628,623 | 34,901,161  | 2 | 1 | 3 | 0 |
| Case 2 | 15 | 34,901,430 | 38,907,041  | 1 | 1 | 2 | 0 |
| Case 2 | 15 | 38,918,032 | 39,193,242  | 2 | 1 | 3 | 0 |
| Case 2 | 15 | 39,194,310 | 40,280,693  | 1 | 1 | 2 | 0 |
| Case 2 | 15 | 40,280,766 | 40,453,430  | 2 | 1 | 3 | 0 |
| Case 2 | 15 | 40,455,894 | 40,539,373  | 1 | 1 | 2 | 0 |
| Case 2 | 15 | 40,539,901 | 40,682,098  | 2 | 1 | 3 | 0 |
| Case 2 | 15 | 40,683,702 | 41,099,827  | 1 | 1 | 2 | 0 |
| Case 2 | 15 | 41,099,843 | 41,223,901  | 2 | 1 | 3 | 0 |
| Case 2 | 15 | 41,224,538 | 41,737,059  | 2 | 0 | 2 | 1 |
| Case 2 | 15 | 41,739,356 | 41,914,305  | 2 | 1 | 3 | 0 |
| Case 2 | 15 | 41,948,046 | 42,059,342  | 1 | 1 | 2 | 0 |
| Case 2 | 15 | 42,059,386 | 42,143,118  | 2 | 1 | 3 | 0 |
| Case 2 | 15 | 42,143,276 | 42,185,151  | 1 | 1 | 2 | 0 |

|        |    |            |            |   |   |   |   |
|--------|----|------------|------------|---|---|---|---|
| Case 2 | 15 | 42,185,157 | 42,468,617 | 2 | 1 | 3 | 0 |
| Case 2 | 15 | 42,479,406 | 42,693,833 | 1 | 1 | 2 | 0 |
| Case 2 | 15 | 42,693,962 | 42,730,193 | 2 | 1 | 3 | 0 |
| Case 2 | 15 | 42,731,622 | 42,979,861 | 1 | 1 | 2 | 0 |
| Case 2 | 15 | 42,980,023 | 42,988,035 | 2 | 1 | 3 | 0 |
| Case 2 | 15 | 42,988,175 | 43,484,990 | 1 | 1 | 2 | 0 |
| Case 2 | 15 | 43,485,930 | 43,571,407 | 2 | 1 | 3 | 0 |
| Case 2 | 15 | 43,571,937 | 43,656,460 | 1 | 1 | 2 | 0 |
| Case 2 | 15 | 43,658,311 | 44,040,965 | 2 | 1 | 3 | 0 |
| Case 2 | 15 | 44,048,870 | 45,248,625 | 1 | 1 | 2 | 0 |
| Case 2 | 15 | 45,248,947 | 45,544,112 | 2 | 1 | 3 | 0 |
| Case 2 | 15 | 45,544,319 | 51,542,757 | 1 | 1 | 2 | 0 |
| Case 2 | 15 | 51,543,382 | 51,696,422 | 2 | 1 | 3 | 0 |
| Case 2 | 15 | 51,696,509 | 56,044,189 | 1 | 1 | 2 | 0 |
| Case 2 | 15 | 56,044,246 | 56,196,809 | 2 | 1 | 3 | 0 |
| Case 2 | 15 | 56,197,002 | 57,598,517 | 1 | 1 | 2 | 0 |
| Case 2 | 15 | 57,602,999 | 58,261,595 | 2 | 1 | 3 | 0 |
| Case 2 | 15 | 58,264,990 | 58,449,818 | 1 | 1 | 2 | 0 |
| Case 2 | 15 | 58,450,274 | 58,852,463 | 2 | 1 | 3 | 0 |
| Case 2 | 15 | 58,853,079 | 59,607,007 | 1 | 1 | 2 | 0 |
| Case 2 | 15 | 59,607,540 | 59,911,217 | 2 | 1 | 3 | 0 |
| Case 2 | 15 | 59,911,218 | 60,895,636 | 1 | 1 | 2 | 0 |
| Case 2 | 15 | 60,899,639 | 61,412,142 | 2 | 1 | 3 | 0 |
| Case 2 | 15 | 61,416,631 | 61,593,667 | 1 | 1 | 2 | 0 |
| Case 2 | 15 | 61,597,447 | 61,845,418 | 2 | 1 | 3 | 0 |
| Case 2 | 15 | 61,845,512 | 62,396,198 | 1 | 1 | 2 | 0 |
| Case 2 | 15 | 62,396,389 | 62,788,601 | 2 | 1 | 3 | 0 |
| Case 2 | 15 | 62,792,939 | 62,844,578 | 1 | 1 | 2 | 0 |
| Case 2 | 15 | 62,849,413 | 62,948,909 | 2 | 1 | 3 | 0 |
| Case 2 | 15 | 62,949,716 | 63,097,853 | 1 | 1 | 2 | 0 |
| Case 2 | 15 | 63,097,958 | 63,295,972 | 2 | 1 | 3 | 0 |
| Case 2 | 15 | 63,299,362 | 64,149,602 | 1 | 1 | 2 | 0 |
| Case 2 | 15 | 64,149,834 | 64,339,939 | 2 | 1 | 3 | 0 |
| Case 2 | 15 | 64,347,946 | 64,933,982 | 1 | 1 | 2 | 0 |
| Case 2 | 15 | 64,962,630 | 65,155,528 | 2 | 1 | 3 | 0 |
| Case 2 | 15 | 65,157,203 | 65,489,880 | 1 | 1 | 2 | 0 |
| Case 2 | 15 | 65,489,926 | 65,556,442 | 2 | 1 | 3 | 0 |
| Case 2 | 15 | 65,562,254 | 66,189,967 | 1 | 1 | 2 | 0 |
| Case 2 | 15 | 66,191,095 | 66,587,187 | 2 | 1 | 3 | 0 |
| Case 2 | 15 | 66,590,779 | 66,850,368 | 1 | 1 | 2 | 0 |
| Case 2 | 15 | 66,850,753 | 67,482,818 | 2 | 1 | 3 | 0 |
| Case 2 | 15 | 67,483,276 | 67,629,346 | 2 | 0 | 2 | 1 |
| Case 2 | 15 | 67,647,218 | 68,334,546 | 2 | 1 | 3 | 0 |
| Case 2 | 15 | 68,349,893 | 68,603,345 | 1 | 1 | 2 | 0 |
| Case 2 | 15 | 68,603,375 | 69,502,443 | 2 | 1 | 3 | 0 |
| Case 2 | 15 | 69,507,460 | 69,789,154 | 1 | 1 | 2 | 0 |
| Case 2 | 15 | 69,790,976 | 70,923,617 | 2 | 1 | 3 | 0 |
| Case 2 | 15 | 70,923,956 | 72,019,504 | 1 | 1 | 2 | 0 |
| Case 2 | 15 | 72,022,755 | 72,119,569 | 2 | 1 | 3 | 0 |
| Case 2 | 15 | 72,120,258 | 73,556,944 | 2 | 0 | 2 | 1 |
| Case 2 | 15 | 73,557,903 | 73,713,958 | 2 | 1 | 3 | 0 |
| Case 2 | 15 | 73,720,489 | 73,968,719 | 1 | 1 | 2 | 0 |
| Case 2 | 15 | 73,971,247 | 74,105,493 | 2 | 1 | 3 | 0 |
| Case 2 | 15 | 74,106,617 | 74,219,582 | 1 | 1 | 2 | 0 |
| Case 2 | 15 | 74,219,602 | 74,327,556 | 2 | 1 | 3 | 0 |
| Case 2 | 15 | 74,327,601 | 74,431,715 | 2 | 0 | 2 | 1 |
| Case 2 | 15 | 74,432,654 | 74,948,380 | 2 | 1 | 3 | 0 |
| Case 2 | 15 | 74,954,187 | 75,122,644 | 1 | 1 | 2 | 0 |
| Case 2 | 15 | 75,122,856 | 75,193,004 | 2 | 1 | 3 | 0 |
| Case 2 | 15 | 75,194,428 | 75,503,193 | 2 | 0 | 2 | 1 |
| Case 2 | 15 | 75,503,198 | 75,651,482 | 2 | 1 | 3 | 0 |

|        |    |             |             |   |   |   |   |
|--------|----|-------------|-------------|---|---|---|---|
| Case 2 | 15 | 75,651,722  | 75,890,934  | 1 | 1 | 2 | 0 |
| Case 2 | 15 | 75,890,977  | 76,134,601  | 2 | 1 | 3 | 0 |
| Case 2 | 15 | 76,136,135  | 76,304,503  | 1 | 1 | 2 | 0 |
| Case 2 | 15 | 76,313,121  | 76,633,551  | 2 | 1 | 3 | 0 |
| Case 2 | 15 | 76,633,575  | 77,241,751  | 1 | 1 | 2 | 0 |
| Case 2 | 15 | 77,251,889  | 77,410,878  | 2 | 1 | 3 | 0 |
| Case 2 | 15 | 77,419,814  | 77,889,192  | 2 | 0 | 2 | 1 |
| Case 2 | 15 | 77,897,197  | 78,301,401  | 2 | 1 | 3 | 0 |
| Case 2 | 15 | 78,305,594  | 78,390,909  | 1 | 1 | 2 | 0 |
| Case 2 | 15 | 78,391,969  | 78,567,957  | 2 | 1 | 3 | 0 |
| Case 2 | 15 | 78,569,950  | 78,890,321  | 1 | 1 | 2 | 0 |
| Case 2 | 15 | 78,893,741  | 79,975,476  | 2 | 1 | 3 | 0 |
| Case 2 | 15 | 79,976,086  | 80,443,036  | 1 | 1 | 2 | 0 |
| Case 2 | 15 | 80,444,677  | 80,969,283  | 2 | 1 | 3 | 0 |
| Case 2 | 15 | 80,981,546  | 81,080,925  | 1 | 1 | 2 | 0 |
| Case 2 | 15 | 81,081,617  | 81,180,069  | 2 | 1 | 3 | 0 |
| Case 2 | 15 | 81,181,084  | 81,572,094  | 1 | 1 | 2 | 0 |
| Case 2 | 15 | 81,575,055  | 81,660,619  | 2 | 1 | 3 | 0 |
| Case 2 | 15 | 81,660,718  | 82,301,556  | 1 | 1 | 2 | 0 |
| Case 2 | 15 | 82,302,369  | 82,416,748  | 2 | 1 | 3 | 0 |
| Case 2 | 15 | 82,422,800  | 83,307,677  | 1 | 1 | 2 | 0 |
| Case 2 | 15 | 83,310,835  | 83,523,424  | 2 | 1 | 3 | 0 |
| Case 2 | 15 | 83,524,257  | 85,411,508  | 1 | 1 | 2 | 0 |
| Case 2 | 15 | 85,411,571  | 85,523,969  | 2 | 1 | 3 | 0 |
| Case 2 | 15 | 85,530,028  | 86,284,700  | 1 | 1 | 2 | 0 |
| Case 2 | 15 | 86,284,712  | 86,688,823  | 2 | 1 | 3 | 0 |
| Case 2 | 15 | 86,690,067  | 87,446,563  | 1 | 1 | 2 | 0 |
| Case 2 | 15 | 87,453,736  | 87,514,883  | 2 | 1 | 3 | 0 |
| Case 2 | 15 | 87,516,847  | 88,566,617  | 1 | 1 | 2 | 0 |
| Case 2 | 15 | 88,571,534  | 88,839,004  | 2 | 1 | 3 | 0 |
| Case 2 | 15 | 88,839,441  | 89,318,783  | 1 | 1 | 2 | 0 |
| Case 2 | 15 | 89,330,574  | 89,680,776  | 2 | 1 | 3 | 0 |
| Case 2 | 15 | 89,683,022  | 89,972,177  | 1 | 1 | 2 | 0 |
| Case 2 | 15 | 89,976,563  | 90,037,233  | 2 | 1 | 3 | 0 |
| Case 2 | 15 | 90,039,643  | 90,320,447  | 1 | 1 | 2 | 0 |
| Case 2 | 15 | 90,320,496  | 90,908,781  | 2 | 1 | 3 | 0 |
| Case 2 | 15 | 90,915,345  | 91,347,451  | 1 | 1 | 2 | 0 |
| Case 2 | 15 | 91,347,463  | 91,810,848  | 2 | 1 | 3 | 0 |
| Case 2 | 15 | 91,811,384  | 92,091,172  | 1 | 1 | 2 | 0 |
| Case 2 | 15 | 92,092,178  | 92,623,345  | 2 | 1 | 3 | 0 |
| Case 2 | 15 | 92,623,503  | 92,669,785  | 2 | 0 | 2 | 1 |
| Case 2 | 15 | 92,671,919  | 92,718,146  | 2 | 1 | 3 | 0 |
| Case 2 | 15 | 92,720,600  | 92,875,495  | 1 | 1 | 2 | 0 |
| Case 2 | 15 | 92,876,467  | 93,286,402  | 2 | 1 | 3 | 0 |
| Case 2 | 15 | 93,293,836  | 93,578,987  | 1 | 1 | 2 | 0 |
| Case 2 | 15 | 93,579,496  | 93,949,013  | 2 | 1 | 3 | 0 |
| Case 2 | 15 | 93,949,082  | 95,197,078  | 1 | 1 | 2 | 0 |
| Case 2 | 15 | 95,197,655  | 95,257,278  | 2 | 1 | 3 | 0 |
| Case 2 | 15 | 95,259,166  | 99,666,979  | 2 | 0 | 2 | 1 |
| Case 2 | 15 | 99,667,686  | 99,673,019  | 3 | 0 | 3 | 1 |
| Case 2 | 15 | 99,673,100  | 99,932,797  | 2 | 0 | 2 | 1 |
| Case 2 | 15 | 99,940,221  | 100,044,888 | 3 | 0 | 3 | 1 |
| Case 2 | 15 | 100,045,237 | 100,589,191 | 2 | 0 | 2 | 1 |
| Case 2 | 15 | 100,591,794 | 100,825,794 | 3 | 0 | 3 | 1 |
| Case 2 | 15 | 100,828,865 | 101,158,916 | 2 | 0 | 2 | 1 |
| Case 2 | 15 | 101,169,643 | 101,475,466 | 3 | 0 | 3 | 1 |
| Case 2 | 15 | 101,480,031 | 101,552,312 | 2 | 0 | 2 | 1 |
| Case 2 | 15 | 101,554,904 | 101,669,194 | 3 | 0 | 3 | 1 |
| Case 2 | 15 | 101,670,586 | 101,919,191 | 2 | 0 | 2 | 1 |
| Case 2 | 15 | 101,919,297 | 102,022,756 | 3 | 0 | 3 | 1 |
| Case 2 | 15 | 102,024,136 | 102,461,162 | 2 | 0 | 2 | 1 |



|        |    |            |            |   |   |   |   |
|--------|----|------------|------------|---|---|---|---|
| Case 2 | 16 | 88,165     | 35,285,582 | 3 | 0 | 3 | 1 |
| Case 2 | 16 | 46,450,037 | 62,796,921 | 3 | 0 | 3 | 1 |
| Case 2 | 16 | 62,799,644 | 62,991,539 | 2 | 0 | 2 | 1 |
| Case 2 | 16 | 62,996,454 | 78,827,057 | 3 | 0 | 3 | 1 |
| Case 2 | 16 | 78,827,366 | 78,829,493 | 2 | 0 | 2 | 1 |
| Case 2 | 16 | 78,829,975 | 78,842,348 | 0 | 0 | 0 | 0 |
| Case 2 | 16 | 78,842,778 | 78,842,778 | 2 | 0 | 2 | 1 |
| Case 2 | 16 | 78,843,942 | 90,274,695 | 3 | 0 | 3 | 1 |
| Case 2 | 17 | 11,885     | 674,696    | 2 | 0 | 2 | 1 |
| Case 2 | 17 | 677,226    | 799,847    | 3 | 0 | 3 | 1 |
| Case 2 | 17 | 799,933    | 1,084,729  | 4 | 0 | 4 | 1 |
| Case 2 | 17 | 1,084,965  | 22,242,355 | 3 | 0 | 3 | 1 |
| Case 2 | 17 | 25,268,142 | 25,268,142 | 3 | 0 | 3 | 1 |
| Case 2 | 17 | 25,295,032 | 27,767,343 | 4 | 0 | 4 | 1 |
| Case 2 | 17 | 27,769,598 | 28,389,576 | 3 | 0 | 3 | 1 |
| Case 2 | 17 | 28,391,076 | 29,161,202 | 3 | 1 | 4 | 0 |
| Case 2 | 17 | 29,161,253 | 29,247,715 | 3 | 0 | 3 | 1 |
| Case 2 | 17 | 29,250,089 | 33,287,651 | 4 | 0 | 4 | 1 |
| Case 2 | 17 | 33,288,363 | 33,331,503 | 3 | 0 | 3 | 1 |
| Case 2 | 17 | 33,332,177 | 34,436,532 | 3 | 1 | 4 | 0 |
| Case 2 | 17 | 34,436,708 | 34,476,396 | 4 | 1 | 5 | 0 |
| Case 2 | 17 | 34,597,521 | 37,389,409 | 3 | 1 | 4 | 0 |
| Case 2 | 17 | 37,393,395 | 37,565,662 | 3 | 0 | 3 | 1 |
| Case 2 | 17 | 37,565,664 | 61,812,655 | 4 | 0 | 4 | 1 |
| Case 2 | 17 | 61,812,733 | 61,901,532 | 3 | 0 | 3 | 1 |
| Case 2 | 17 | 61,901,555 | 67,247,900 | 4 | 0 | 4 | 1 |
| Case 2 | 17 | 67,249,922 | 67,298,109 | 3 | 0 | 3 | 1 |
| Case 2 | 17 | 67,298,327 | 79,602,820 | 4 | 0 | 4 | 1 |
| Case 2 | 17 | 79,607,812 | 79,614,966 | 2 | 0 | 2 | 1 |
| Case 2 | 17 | 79,615,022 | 79,660,570 | 3 | 0 | 3 | 1 |
| Case 2 | 17 | 79,660,598 | 80,004,050 | 2 | 0 | 2 | 1 |
| Case 2 | 17 | 80,004,769 | 81,060,040 | 4 | 0 | 4 | 1 |
| Case 2 | 18 | 87,505     | 165,453    | 2 | 0 | 2 | 1 |
| Case 2 | 18 | 166,277    | 319,935    | 1 | 0 | 1 | 0 |
| Case 2 | 18 | 321,773    | 1,128,744  | 2 | 0 | 2 | 1 |
| Case 2 | 18 | 1,134,695  | 1,464,859  | 1 | 0 | 1 | 0 |
| Case 2 | 18 | 1,466,512  | 1,662,987  | 2 | 0 | 2 | 1 |
| Case 2 | 18 | 1,681,354  | 1,773,145  | 1 | 0 | 1 | 0 |
| Case 2 | 18 | 1,775,283  | 2,548,668  | 2 | 0 | 2 | 1 |
| Case 2 | 18 | 2,553,775  | 2,567,041  | 1 | 0 | 1 | 0 |
| Case 2 | 18 | 2,567,113  | 2,687,926  | 2 | 0 | 2 | 1 |
| Case 2 | 18 | 2,694,636  | 2,804,129  | 1 | 0 | 1 | 0 |
| Case 2 | 18 | 2,817,052  | 4,363,364  | 2 | 0 | 2 | 1 |
| Case 2 | 18 | 4,370,882  | 4,405,472  | 1 | 0 | 1 | 0 |
| Case 2 | 18 | 4,405,706  | 4,597,482  | 2 | 0 | 2 | 1 |
| Case 2 | 18 | 4,601,573  | 4,673,080  | 1 | 0 | 1 | 0 |
| Case 2 | 18 | 4,673,119  | 6,138,205  | 2 | 0 | 2 | 1 |
| Case 2 | 18 | 6,144,385  | 6,267,970  | 1 | 0 | 1 | 0 |
| Case 2 | 18 | 6,272,348  | 8,031,623  | 2 | 0 | 2 | 1 |
| Case 2 | 18 | 8,034,941  | 9,919,965  | 5 | 0 | 5 | 1 |
| Case 2 | 18 | 9,922,512  | 9,926,968  | 7 | 0 | 7 | 1 |
| Case 2 | 18 | 9,929,330  | 10,121,949 | 3 | 0 | 3 | 1 |
| Case 2 | 18 | 10,124,648 | 10,581,304 | 4 | 0 | 4 | 1 |
| Case 2 | 18 | 10,590,943 | 10,742,289 | 2 | 0 | 2 | 1 |
| Case 2 | 18 | 10,750,150 | 10,832,851 | 3 | 0 | 3 | 1 |
| Case 2 | 18 | 10,834,568 | 10,841,164 | 4 | 0 | 4 | 1 |
| Case 2 | 18 | 10,842,934 | 11,244,990 | 5 | 0 | 5 | 1 |
| Case 2 | 18 | 11,245,830 | 11,911,143 | 4 | 0 | 4 | 1 |
| Case 2 | 18 | 11,912,236 | 12,132,247 | 5 | 0 | 5 | 1 |
| Case 2 | 18 | 12,141,372 | 13,033,053 | 6 | 0 | 6 | 1 |
| Case 2 | 18 | 13,035,831 | 14,000,394 | 5 | 0 | 5 | 1 |

|        |    |            |            |   |   |   |   |
|--------|----|------------|------------|---|---|---|---|
| Case 2 | 18 | 14,000,961 | 14,351,150 | 4 | 0 | 4 | 1 |
| Case 2 | 18 | 14,352,092 | 14,949,001 | 3 | 0 | 3 | 1 |
| Case 2 | 18 | 14,949,581 | 15,375,878 | 2 | 0 | 2 | 1 |
| Case 2 | 18 | 18,520,354 | 18,671,098 | 1 | 0 | 1 | 0 |
| Case 2 | 18 | 18,681,293 | 18,868,650 | 2 | 0 | 2 | 1 |
| Case 2 | 18 | 18,877,014 | 19,155,511 | 3 | 0 | 3 | 1 |
| Case 2 | 18 | 19,156,645 | 19,814,796 | 4 | 0 | 4 | 1 |
| Case 2 | 18 | 19,823,874 | 20,079,239 | 3 | 0 | 3 | 1 |
| Case 2 | 18 | 20,082,830 | 20,648,100 | 4 | 0 | 4 | 1 |
| Case 2 | 18 | 20,648,375 | 20,970,706 | 5 | 0 | 5 | 1 |
| Case 2 | 18 | 20,977,523 | 20,977,523 | 4 | 0 | 4 | 1 |
| Case 2 | 18 | 20,996,401 | 21,017,770 | 2 | 0 | 2 | 1 |
| Case 2 | 18 | 21,022,448 | 21,055,066 | 1 | 0 | 1 | 0 |
| Case 2 | 18 | 21,057,186 | 23,615,004 | 2 | 0 | 2 | 1 |
| Case 2 | 18 | 23,619,415 | 23,954,481 | 1 | 0 | 1 | 0 |
| Case 2 | 18 | 23,976,352 | 24,718,085 | 2 | 0 | 2 | 1 |
| Case 2 | 18 | 24,722,839 | 24,746,599 | 1 | 0 | 1 | 0 |
| Case 2 | 18 | 24,747,427 | 25,468,519 | 2 | 0 | 2 | 1 |
| Case 2 | 18 | 25,473,942 | 25,532,304 | 1 | 0 | 1 | 0 |
| Case 2 | 18 | 25,533,472 | 25,917,138 | 2 | 0 | 2 | 1 |
| Case 2 | 18 | 25,917,993 | 26,049,216 | 1 | 0 | 1 | 0 |
| Case 2 | 18 | 26,055,555 | 26,205,667 | 2 | 0 | 2 | 1 |
| Case 2 | 18 | 26,212,054 | 26,647,501 | 1 | 0 | 1 | 0 |
| Case 2 | 18 | 26,651,884 | 27,106,546 | 2 | 0 | 2 | 1 |
| Case 2 | 18 | 27,107,672 | 27,192,608 | 1 | 0 | 1 | 0 |
| Case 2 | 18 | 27,202,573 | 27,338,363 | 2 | 0 | 2 | 1 |
| Case 2 | 18 | 27,349,529 | 27,503,908 | 1 | 0 | 1 | 0 |
| Case 2 | 18 | 27,506,375 | 27,773,905 | 2 | 0 | 2 | 1 |
| Case 2 | 18 | 27,778,530 | 27,820,011 | 1 | 0 | 1 | 0 |
| Case 2 | 18 | 27,826,653 | 28,556,767 | 2 | 0 | 2 | 1 |
| Case 2 | 18 | 28,557,935 | 28,588,260 | 1 | 0 | 1 | 0 |
| Case 2 | 18 | 28,588,281 | 28,935,694 | 2 | 0 | 2 | 1 |
| Case 2 | 18 | 28,936,574 | 28,986,156 | 1 | 0 | 1 | 0 |
| Case 2 | 18 | 28,986,173 | 29,057,719 | 2 | 0 | 2 | 1 |
| Case 2 | 18 | 29,057,915 | 29,124,424 | 1 | 0 | 1 | 0 |
| Case 2 | 18 | 29,125,854 | 29,426,774 | 2 | 0 | 2 | 1 |
| Case 2 | 18 | 29,429,596 | 29,511,423 | 1 | 0 | 1 | 0 |
| Case 2 | 18 | 29,527,884 | 30,488,989 | 2 | 0 | 2 | 1 |
| Case 2 | 18 | 30,497,848 | 31,226,574 | 1 | 0 | 1 | 0 |
| Case 2 | 18 | 31,232,549 | 31,428,491 | 2 | 0 | 2 | 1 |
| Case 2 | 18 | 31,429,793 | 31,863,329 | 1 | 0 | 1 | 0 |
| Case 2 | 18 | 31,864,221 | 33,381,348 | 2 | 0 | 2 | 1 |
| Case 2 | 18 | 33,396,298 | 33,541,214 | 1 | 0 | 1 | 0 |
| Case 2 | 18 | 33,543,660 | 33,712,708 | 2 | 0 | 2 | 1 |
| Case 2 | 18 | 33,714,241 | 33,747,114 | 1 | 0 | 1 | 0 |
| Case 2 | 18 | 33,749,871 | 37,837,257 | 2 | 0 | 2 | 1 |
| Case 2 | 18 | 37,839,146 | 37,927,029 | 1 | 0 | 1 | 0 |
| Case 2 | 18 | 37,927,854 | 40,377,844 | 2 | 0 | 2 | 1 |
| Case 2 | 18 | 40,385,804 | 40,554,120 | 1 | 0 | 1 | 0 |
| Case 2 | 18 | 40,554,893 | 40,765,236 | 2 | 0 | 2 | 1 |
| Case 2 | 18 | 40,771,509 | 40,853,969 | 1 | 0 | 1 | 0 |
| Case 2 | 18 | 40,854,045 | 41,252,700 | 2 | 0 | 2 | 1 |
| Case 2 | 18 | 41,275,749 | 41,394,771 | 1 | 0 | 1 | 0 |
| Case 2 | 18 | 41,402,605 | 41,509,786 | 2 | 0 | 2 | 1 |
| Case 2 | 18 | 41,511,472 | 42,077,844 | 1 | 0 | 1 | 0 |
| Case 2 | 18 | 42,077,905 | 50,367,412 | 2 | 0 | 2 | 1 |
| Case 2 | 18 | 50,367,848 | 50,451,651 | 1 | 0 | 1 | 0 |
| Case 2 | 18 | 50,451,821 | 50,726,559 | 2 | 0 | 2 | 1 |
| Case 2 | 18 | 50,731,688 | 50,864,668 | 1 | 0 | 1 | 0 |
| Case 2 | 18 | 50,866,195 | 51,114,375 | 2 | 0 | 2 | 1 |
| Case 2 | 18 | 51,129,489 | 51,344,269 | 1 | 0 | 1 | 0 |

|        |    |            |            |   |   |   |   |
|--------|----|------------|------------|---|---|---|---|
| Case 2 | 18 | 51,364,239 | 51,802,826 | 2 | 0 | 2 | 1 |
| Case 2 | 18 | 51,805,130 | 51,820,035 | 1 | 0 | 1 | 0 |
| Case 2 | 18 | 51,820,070 | 53,778,612 | 2 | 0 | 2 | 1 |
| Case 2 | 18 | 53,778,970 | 53,854,465 | 1 | 0 | 1 | 0 |
| Case 2 | 18 | 53,855,551 | 58,072,536 | 2 | 0 | 2 | 1 |
| Case 2 | 18 | 58,092,295 | 58,436,769 | 1 | 0 | 1 | 0 |
| Case 2 | 18 | 58,443,832 | 59,701,010 | 2 | 0 | 2 | 1 |
| Case 2 | 18 | 59,705,118 | 59,825,010 | 1 | 0 | 1 | 0 |
| Case 2 | 18 | 59,828,406 | 61,154,847 | 2 | 0 | 2 | 1 |
| Case 2 | 18 | 61,154,993 | 61,163,084 | 1 | 0 | 1 | 0 |
| Case 2 | 18 | 61,163,925 | 62,100,203 | 2 | 0 | 2 | 1 |
| Case 2 | 18 | 62,102,326 | 62,289,513 | 1 | 0 | 1 | 0 |
| Case 2 | 18 | 62,292,218 | 62,508,766 | 2 | 0 | 2 | 1 |
| Case 2 | 18 | 62,517,764 | 62,885,650 | 1 | 0 | 1 | 0 |
| Case 2 | 18 | 62,893,870 | 63,112,979 | 2 | 0 | 2 | 1 |
| Case 2 | 18 | 63,115,253 | 63,490,350 | 1 | 0 | 1 | 0 |
| Case 2 | 18 | 63,496,823 | 63,588,845 | 2 | 0 | 2 | 1 |
| Case 2 | 18 | 63,593,459 | 63,884,706 | 1 | 0 | 1 | 0 |
| Case 2 | 18 | 63,889,002 | 64,009,083 | 2 | 0 | 2 | 1 |
| Case 2 | 18 | 64,009,325 | 64,702,698 | 1 | 0 | 1 | 0 |
| Case 2 | 18 | 64,703,048 | 64,841,801 | 2 | 0 | 2 | 1 |
| Case 2 | 18 | 64,844,503 | 65,178,779 | 1 | 0 | 1 | 0 |
| Case 2 | 18 | 65,178,905 | 65,378,004 | 2 | 0 | 2 | 1 |
| Case 2 | 18 | 65,378,287 | 65,585,580 | 1 | 0 | 1 | 0 |
| Case 2 | 18 | 65,586,674 | 65,686,386 | 2 | 0 | 2 | 1 |
| Case 2 | 18 | 65,690,189 | 65,926,525 | 1 | 0 | 1 | 0 |
| Case 2 | 18 | 65,928,485 | 66,136,653 | 2 | 0 | 2 | 1 |
| Case 2 | 18 | 66,137,729 | 66,162,830 | 1 | 0 | 1 | 0 |
| Case 2 | 18 | 66,167,919 | 67,393,698 | 2 | 0 | 2 | 1 |
| Case 2 | 18 | 67,404,128 | 67,484,495 | 1 | 0 | 1 | 0 |
| Case 2 | 18 | 67,485,339 | 67,718,688 | 2 | 0 | 2 | 1 |
| Case 2 | 18 | 67,718,745 | 67,863,859 | 1 | 0 | 1 | 0 |
| Case 2 | 18 | 67,864,880 | 68,791,898 | 2 | 0 | 2 | 1 |
| Case 2 | 18 | 68,796,445 | 69,968,737 | 1 | 0 | 1 | 0 |
| Case 2 | 18 | 69,969,195 | 70,690,720 | 2 | 0 | 2 | 1 |
| Case 2 | 18 | 70,691,802 | 70,938,279 | 1 | 0 | 1 | 0 |
| Case 2 | 18 | 70,940,084 | 71,010,591 | 2 | 0 | 2 | 1 |
| Case 2 | 18 | 71,011,735 | 71,055,729 | 1 | 0 | 1 | 0 |
| Case 2 | 18 | 71,055,969 | 76,086,818 | 2 | 0 | 2 | 1 |
| Case 2 | 18 | 76,089,528 | 76,143,140 | 1 | 0 | 1 | 0 |
| Case 2 | 18 | 76,150,938 | 78,015,180 | 2 | 0 | 2 | 1 |
| Case 2 | 19 | 260,912    | 9,434,464  | 2 | 1 | 3 | 0 |
| Case 2 | 19 | 9,437,812  | 9,639,848  | 2 | 0 | 2 | 1 |
| Case 2 | 19 | 9,640,032  | 12,040,283 | 2 | 1 | 3 | 0 |
| Case 2 | 19 | 12,046,336 | 12,188,266 | 2 | 0 | 2 | 1 |
| Case 2 | 19 | 12,196,190 | 12,450,725 | 3 | 0 | 3 | 1 |
| Case 2 | 19 | 12,459,171 | 12,542,685 | 2 | 0 | 2 | 1 |
| Case 2 | 19 | 12,548,494 | 19,973,452 | 2 | 1 | 3 | 0 |
| Case 2 | 19 | 19,974,727 | 20,003,486 | 2 | 0 | 2 | 1 |
| Case 2 | 19 | 20,005,264 | 20,218,177 | 3 | 0 | 3 | 1 |
| Case 2 | 19 | 20,218,226 | 20,500,515 | 2 | 0 | 2 | 1 |
| Case 2 | 19 | 20,626,179 | 20,707,568 | 1 | 0 | 1 | 0 |
| Case 2 | 19 | 20,715,228 | 20,788,625 | 2 | 0 | 2 | 1 |
| Case 2 | 19 | 20,788,887 | 20,892,999 | 2 | 1 | 3 | 0 |
| Case 2 | 19 | 20,905,979 | 21,720,803 | 2 | 0 | 2 | 1 |
| Case 2 | 19 | 21,740,058 | 21,891,943 | 2 | 1 | 3 | 0 |
| Case 2 | 19 | 21,909,496 | 21,996,666 | 2 | 0 | 2 | 1 |
| Case 2 | 19 | 22,020,770 | 23,804,041 | 2 | 1 | 3 | 0 |
| Case 2 | 19 | 23,814,365 | 23,937,693 | 1 | 1 | 2 | 0 |
| Case 2 | 19 | 23,938,402 | 24,379,583 | 2 | 1 | 3 | 0 |
| Case 2 | 19 | 24,392,064 | 24,629,285 | 2 | 0 | 2 | 1 |

|        |    |            |            |   |   |   |   |
|--------|----|------------|------------|---|---|---|---|
| Case 2 | 19 | 27,732,159 | 28,213,271 | 2 | 0 | 2 | 1 |
| Case 2 | 19 | 28,231,750 | 36,871,730 | 2 | 1 | 3 | 0 |
| Case 2 | 19 | 36,876,843 | 37,634,291 | 2 | 0 | 2 | 1 |
| Case 2 | 19 | 37,639,701 | 37,854,235 | 3 | 0 | 3 | 1 |
| Case 2 | 19 | 37,854,273 | 37,985,453 | 2 | 0 | 2 | 1 |
| Case 2 | 19 | 37,993,637 | 38,043,260 | 2 | 1 | 3 | 0 |
| Case 2 | 19 | 38,055,534 | 38,160,742 | 2 | 0 | 2 | 1 |
| Case 2 | 19 | 38,160,893 | 38,572,747 | 2 | 1 | 3 | 0 |
| Case 2 | 19 | 38,572,881 | 40,519,935 | 3 | 0 | 3 | 1 |
| Case 2 | 19 | 40,520,457 | 40,650,002 | 2 | 0 | 2 | 1 |
| Case 2 | 19 | 40,657,509 | 44,342,977 | 2 | 1 | 3 | 0 |
| Case 2 | 19 | 44,348,824 | 44,383,800 | 2 | 0 | 2 | 1 |
| Case 2 | 19 | 44,384,163 | 52,529,074 | 2 | 1 | 3 | 0 |
| Case 2 | 19 | 52,535,421 | 52,570,767 | 1 | 1 | 2 | 0 |
| Case 2 | 19 | 52,578,347 | 53,114,267 | 2 | 1 | 3 | 0 |
| Case 2 | 19 | 53,116,060 | 53,116,060 | 2 | 0 | 2 | 1 |
| Case 2 | 19 | 53,116,331 | 53,118,278 | 1 | 1 | 2 | 0 |
| Case 2 | 19 | 53,119,029 | 53,297,766 | 2 | 1 | 3 | 0 |
| Case 2 | 19 | 53,300,984 | 53,345,371 | 2 | 0 | 2 | 1 |
| Case 2 | 19 | 53,352,341 | 53,644,456 | 2 | 1 | 3 | 0 |
| Case 2 | 19 | 53,644,640 | 53,741,744 | 2 | 0 | 2 | 1 |
| Case 2 | 19 | 53,741,805 | 59,097,160 | 2 | 1 | 3 | 0 |
| Case 2 | 20 | 63,244     | 9,919,383  | 3 | 1 | 4 | 0 |
| Case 2 | 20 | 9,920,824  | 13,257,470 | 2 | 1 | 3 | 0 |
| Case 2 | 20 | 13,258,606 | 14,096,380 | 2 | 2 | 4 | 0 |
| Case 2 | 20 | 14,106,881 | 14,926,362 | 3 | 1 | 4 | 0 |
| Case 2 | 20 | 14,927,862 | 15,073,680 | 3 | 0 | 3 | 1 |
| Case 2 | 20 | 15,077,030 | 18,226,696 | 3 | 1 | 4 | 0 |
| Case 2 | 20 | 18,227,170 | 19,258,891 | 4 | 1 | 5 | 0 |
| Case 2 | 20 | 19,261,606 | 26,293,985 | 3 | 1 | 4 | 0 |
| Case 2 | 20 | 29,425,357 | 54,054,665 | 3 | 1 | 4 | 0 |
| Case 2 | 20 | 54,054,720 | 58,410,581 | 4 | 0 | 4 | 1 |
| Case 2 | 20 | 58,411,279 | 58,560,168 | 3 | 0 | 3 | 1 |
| Case 2 | 20 | 58,562,673 | 61,386,147 | 4 | 0 | 4 | 1 |
| Case 2 | 20 | 61,386,232 | 61,595,636 | 3 | 0 | 3 | 1 |
| Case 2 | 20 | 61,596,503 | 62,948,788 | 3 | 1 | 4 | 0 |
| Case 2 | 21 | 10,827,533 | 10,971,337 | 2 | 0 | 2 | 1 |
| Case 2 | 21 | 14,368,320 | 20,773,681 | 2 | 0 | 2 | 1 |
| Case 2 | 21 | 20,779,299 | 21,150,015 | 0 | 0 | 0 | 0 |
| Case 2 | 21 | 21,168,116 | 32,253,365 | 2 | 0 | 2 | 1 |
| Case 2 | 21 | 32,253,453 | 32,940,469 | 3 | 0 | 3 | 1 |
| Case 2 | 21 | 32,949,556 | 33,206,932 | 2 | 0 | 2 | 1 |
| Case 2 | 21 | 33,212,509 | 33,905,191 | 3 | 0 | 3 | 1 |
| Case 2 | 21 | 33,906,744 | 34,223,288 | 2 | 0 | 2 | 1 |
| Case 2 | 21 | 34,238,324 | 34,806,288 | 3 | 0 | 3 | 1 |
| Case 2 | 21 | 34,809,233 | 35,199,880 | 2 | 0 | 2 | 1 |
| Case 2 | 21 | 35,200,374 | 37,558,042 | 3 | 0 | 3 | 1 |
| Case 2 | 21 | 37,563,298 | 37,856,952 | 2 | 0 | 2 | 1 |
| Case 2 | 21 | 37,865,339 | 38,433,519 | 3 | 0 | 3 | 1 |
| Case 2 | 21 | 38,436,825 | 40,512,918 | 2 | 0 | 2 | 1 |
| Case 2 | 21 | 40,520,783 | 40,667,811 | 1 | 0 | 1 | 0 |
| Case 2 | 21 | 40,669,083 | 40,792,696 | 2 | 0 | 2 | 1 |
| Case 2 | 21 | 40,792,722 | 40,818,379 | 1 | 0 | 1 | 0 |
| Case 2 | 21 | 40,819,685 | 47,819,694 | 2 | 0 | 2 | 1 |
| Case 2 | 21 | 47,821,583 | 47,831,866 | 1 | 0 | 1 | 0 |
| Case 2 | 21 | 47,831,941 | 48,100,155 | 2 | 0 | 2 | 1 |
| Case 2 | 22 | 16,114,244 | 17,306,104 | 1 | 1 | 2 | 0 |
| Case 2 | 22 | 17,310,741 | 21,973,319 | 2 | 1 | 3 | 0 |
| Case 2 | 22 | 21,976,934 | 22,542,083 | 1 | 1 | 2 | 0 |
| Case 2 | 22 | 22,548,831 | 40,729,614 | 2 | 1 | 3 | 0 |
| Case 2 | 22 | 40,731,134 | 40,849,704 | 1 | 1 | 2 | 0 |

|        |    |             |             |   |   |   |   |
|--------|----|-------------|-------------|---|---|---|---|
| Case 2 | 22 | 40,859,004  | 51,195,728  | 2 | 1 | 3 | 0 |
| Case 4 | 1  | 82,154      | 19,590,043  | 1 | 1 | 2 | 0 |
| Case 4 | 1  | 19,593,199  | 19,647,578  | 1 | 0 | 1 | 0 |
| Case 4 | 1  | 19,650,220  | 110,221,506 | 1 | 1 | 2 | 0 |
| Case 4 | 1  | 110,230,836 | 110,234,286 | 2 | 1 | 3 | 0 |
| Case 4 | 1  | 110,253,241 | 121,346,616 | 1 | 1 | 2 | 0 |
| Case 4 | 1  | 142,649,718 | 234,704,046 | 1 | 1 | 2 | 0 |
| Case 4 | 1  | 234,706,308 | 234,707,376 | 1 | 0 | 1 | 0 |
| Case 4 | 1  | 234,710,593 | 249,218,992 | 1 | 1 | 2 | 0 |
| Case 4 | 2  | 18,674      | 92,081,640  | 1 | 1 | 2 | 0 |
| Case 4 | 2  | 95,429,424  | 205,172,592 | 1 | 1 | 2 | 0 |
| Case 4 | 2  | 205,177,507 | 205,499,566 | 2 | 1 | 3 | 0 |
| Case 4 | 2  | 205,505,348 | 243,048,760 | 1 | 1 | 2 | 0 |
| Case 4 | 3  | 61,495      | 60,337,651  | 1 | 1 | 2 | 0 |
| Case 4 | 3  | 60,340,650  | 60,357,382  | 1 | 0 | 1 | 0 |
| Case 4 | 3  | 60,358,100  | 60,358,100  | 1 | 1 | 2 | 0 |
| Case 4 | 3  | 60,358,517  | 60,523,330  | 0 | 0 | 0 | 0 |
| Case 4 | 3  | 60,531,242  | 60,631,936  | 1 | 0 | 1 | 0 |
| Case 4 | 3  | 60,636,061  | 75,785,358  | 1 | 1 | 2 | 0 |
| Case 4 | 3  | 75,786,288  | 75,790,472  | 1 | 0 | 1 | 0 |
| Case 4 | 3  | 75,790,880  | 90,442,925  | 1 | 1 | 2 | 0 |
| Case 4 | 3  | 93,537,290  | 193,134,759 | 1 | 1 | 2 | 0 |
| Case 4 | 3  | 193,136,476 | 193,140,348 | 1 | 0 | 1 | 0 |
| Case 4 | 3  | 193,144,406 | 197,838,262 | 1 | 1 | 2 | 0 |
| Case 4 | 4  | 71,566      | 49,620,898  | 1 | 1 | 2 | 0 |
| Case 4 | 4  | 52,697,856  | 74,466,409  | 1 | 1 | 2 | 0 |
| Case 4 | 4  | 74,476,703  | 74,477,529  | 1 | 0 | 1 | 0 |
| Case 4 | 4  | 74,489,271  | 151,547,243 | 1 | 1 | 2 | 0 |
| Case 4 | 4  | 151,574,839 | 151,883,290 | 1 | 0 | 1 | 0 |
| Case 4 | 4  | 151,884,313 | 161,856,343 | 1 | 1 | 2 | 0 |
| Case 4 | 4  | 161,861,640 | 161,924,832 | 2 | 1 | 3 | 0 |
| Case 4 | 4  | 161,935,342 | 190,963,766 | 1 | 1 | 2 | 0 |
| Case 4 | 5  | 38,139      | 685,748     | 1 | 1 | 2 | 0 |
| Case 4 | 5  | 730,271     | 825,329     | 2 | 1 | 3 | 0 |
| Case 4 | 5  | 825,338     | 32,101,318  | 1 | 1 | 2 | 0 |
| Case 4 | 5  | 32,101,400  | 32,125,842  | 2 | 1 | 3 | 0 |
| Case 4 | 5  | 32,126,134  | 32,135,762  | 1 | 1 | 2 | 0 |
| Case 4 | 5  | 32,135,916  | 32,159,517  | 2 | 1 | 3 | 0 |
| Case 4 | 5  | 32,169,547  | 46,399,093  | 1 | 1 | 2 | 0 |
| Case 4 | 5  | 49,457,282  | 96,094,973  | 1 | 1 | 2 | 0 |
| Case 4 | 5  | 96,097,895  | 96,098,214  | 2 | 1 | 3 | 0 |
| Case 4 | 5  | 96,100,929  | 139,931,620 | 1 | 1 | 2 | 0 |
| Case 4 | 5  | 139,931,629 | 139,931,644 | 0 | 0 | 0 | 0 |
| Case 4 | 5  | 139,931,646 | 139,931,660 | 1 | 0 | 1 | 0 |
| Case 4 | 5  | 139,931,661 | 178,724,727 | 1 | 1 | 2 | 0 |
| Case 4 | 5  | 178,730,062 | 178,935,665 | 2 | 1 | 3 | 0 |
| Case 4 | 5  | 178,936,722 | 180,693,127 | 1 | 1 | 2 | 0 |
| Case 4 | 6  | 108,666     | 45,302,654  | 2 | 0 | 2 | 1 |
| Case 4 | 6  | 45,310,525  | 58,752,089  | 1 | 1 | 2 | 0 |
| Case 4 | 6  | 61,891,118  | 170,980,171 | 1 | 1 | 2 | 0 |
| Case 4 | 7  | 44,935      | 46,093,628  | 1 | 1 | 2 | 0 |
| Case 4 | 7  | 46,113,834  | 46,113,883  | 1 | 0 | 1 | 0 |
| Case 4 | 7  | 46,116,722  | 58,019,061  | 1 | 1 | 2 | 0 |
| Case 4 | 7  | 61,056,053  | 62,159,926  | 1 | 1 | 2 | 0 |
| Case 4 | 7  | 62,172,732  | 62,358,419  | 1 | 0 | 1 | 0 |
| Case 4 | 7  | 62,360,358  | 62,675,942  | 1 | 1 | 2 | 0 |
| Case 4 | 7  | 62,677,044  | 62,729,224  | 1 | 0 | 1 | 0 |
| Case 4 | 7  | 62,777,355  | 91,029,468  | 1 | 1 | 2 | 0 |
| Case 4 | 7  | 91,033,074  | 91,038,222  | 1 | 0 | 1 | 0 |
| Case 4 | 7  | 91,043,217  | 110,617,845 | 1 | 1 | 2 | 0 |
| Case 4 | 7  | 110,631,333 | 110,678,928 | 1 | 0 | 1 | 0 |

|        |    |             |             |   |   |   |   |
|--------|----|-------------|-------------|---|---|---|---|
| Case 4 | 7  | 110,681,482 | 153,478,281 | 1 | 1 | 2 | 0 |
| Case 4 | 7  | 153,485,627 | 153,654,045 | 2 | 1 | 3 | 0 |
| Case 4 | 7  | 153,670,448 | 159,119,486 | 1 | 1 | 2 | 0 |
| Case 4 | 8  | 164,984     | 43,025,774  | 2 | 0 | 2 | 1 |
| Case 4 | 8  | 43,045,980  | 43,791,691  | 1 | 1 | 2 | 0 |
| Case 4 | 8  | 46,886,735  | 135,056,888 | 1 | 1 | 2 | 0 |
| Case 4 | 8  | 135,062,170 | 135,065,947 | 1 | 0 | 1 | 0 |
| Case 4 | 8  | 135,068,340 | 146,293,414 | 1 | 1 | 2 | 0 |
| Case 4 | 9  | 46,587      | 46,944,322  | 1 | 1 | 2 | 0 |
| Case 4 | 9  | 65,629,772  | 141,066,491 | 1 | 1 | 2 | 0 |
| Case 4 | 10 | 98,087      | 39,097,912  | 1 | 1 | 2 | 0 |
| Case 4 | 10 | 42,436,301  | 75,037,999  | 1 | 1 | 2 | 0 |
| Case 4 | 10 | 75,038,041  | 77,316,235  | 2 | 0 | 2 | 1 |
| Case 4 | 10 | 77,325,146  | 77,357,347  | 1 | 0 | 1 | 0 |
| Case 4 | 10 | 77,364,207  | 77,422,702  | 2 | 0 | 2 | 1 |
| Case 4 | 10 | 77,423,250  | 77,456,175  | 1 | 1 | 2 | 0 |
| Case 4 | 10 | 77,461,012  | 77,504,287  | 0 | 0 | 0 | 0 |
| Case 4 | 10 | 77,529,032  | 135,477,883 | 2 | 0 | 2 | 1 |
| Case 4 | 11 | 193,146     | 50,668,400  | 1 | 1 | 2 | 0 |
| Case 4 | 11 | 50,697,498  | 51,372,036  | 1 | 0 | 1 | 0 |
| Case 4 | 11 | 51,379,204  | 51,591,253  | 2 | 0 | 2 | 1 |
| Case 4 | 11 | 54,794,237  | 55,541,602  | 2 | 0 | 2 | 1 |
| Case 4 | 11 | 55,541,620  | 56,310,373  | 1 | 1 | 2 | 0 |
| Case 4 | 11 | 56,310,498  | 56,514,523  | 2 | 0 | 2 | 1 |
| Case 4 | 11 | 56,517,109  | 58,807,241  | 1 | 1 | 2 | 0 |
| Case 4 | 11 | 58,820,988  | 58,846,985  | 2 | 1 | 3 | 0 |
| Case 4 | 11 | 58,863,775  | 134,934,063 | 1 | 1 | 2 | 0 |
| Case 4 | 12 | 191,619     | 30,236,433  | 1 | 1 | 2 | 0 |
| Case 4 | 12 | 30,237,954  | 30,243,473  | 1 | 0 | 1 | 0 |
| Case 4 | 12 | 30,243,631  | 34,853,011  | 1 | 1 | 2 | 0 |
| Case 4 | 12 | 37,876,400  | 133,810,935 | 1 | 1 | 2 | 0 |
| Case 4 | 13 | 19,058,717  | 115,103,529 | 1 | 1 | 2 | 0 |
| Case 4 | 14 | 19,280,733  | 20,404,671  | 1 | 1 | 2 | 0 |
| Case 4 | 14 | 20,404,736  | 20,420,338  | 2 | 1 | 3 | 0 |
| Case 4 | 14 | 20,425,051  | 107,287,663 | 1 | 1 | 2 | 0 |
| Case 4 | 15 | 20,034,919  | 102,461,162 | 1 | 1 | 2 | 0 |
| Case 4 | 16 | 88,165      | 16,276,741  | 1 | 1 | 2 | 0 |
| Case 4 | 16 | 16,276,964  | 16,280,921  | 2 | 1 | 3 | 0 |
| Case 4 | 16 | 16,281,007  | 35,285,582  | 1 | 1 | 2 | 0 |
| Case 4 | 16 | 46,450,037  | 70,024,302  | 1 | 1 | 2 | 0 |
| Case 4 | 16 | 70,031,958  | 70,190,742  | 2 | 1 | 3 | 0 |
| Case 4 | 16 | 70,192,432  | 78,960,323  | 1 | 1 | 2 | 0 |
| Case 4 | 16 | 78,961,207  | 79,009,468  | 2 | 1 | 3 | 0 |
| Case 4 | 16 | 79,009,746  | 79,035,744  | 1 | 1 | 2 | 0 |
| Case 4 | 16 | 79,036,736  | 79,109,753  | 2 | 1 | 3 | 0 |
| Case 4 | 16 | 79,111,834  | 79,136,139  | 1 | 1 | 2 | 0 |
| Case 4 | 16 | 79,143,983  | 79,235,804  | 2 | 1 | 3 | 0 |
| Case 4 | 16 | 79,236,908  | 90,274,695  | 1 | 1 | 2 | 0 |
| Case 4 | 17 | 11,885      | 22,242,355  | 1 | 1 | 2 | 0 |
| Case 4 | 17 | 25,268,142  | 34,436,708  | 1 | 1 | 2 | 0 |
| Case 4 | 17 | 34,443,811  | 34,597,521  | 2 | 1 | 3 | 0 |
| Case 4 | 17 | 34,815,551  | 81,060,040  | 1 | 1 | 2 | 0 |
| Case 4 | 18 | 87,505      | 15,375,878  | 1 | 1 | 2 | 0 |
| Case 4 | 18 | 18,520,354  | 25,978,719  | 1 | 1 | 2 | 0 |
| Case 4 | 18 | 26,010,927  | 28,934,293  | 1 | 0 | 1 | 0 |
| Case 4 | 18 | 28,934,359  | 28,935,092  | 2 | 0 | 2 | 1 |
| Case 4 | 18 | 28,935,123  | 28,992,822  | 1 | 0 | 1 | 0 |
| Case 4 | 18 | 28,993,073  | 28,993,504  | 2 | 0 | 2 | 1 |
| Case 4 | 18 | 28,993,526  | 29,054,294  | 1 | 0 | 1 | 0 |
| Case 4 | 18 | 29,054,330  | 29,056,170  | 2 | 0 | 2 | 1 |
| Case 4 | 18 | 29,056,465  | 29,143,098  | 1 | 0 | 1 | 0 |

|        |    |            |            |   |   |   |   |
|--------|----|------------|------------|---|---|---|---|
| Case 4 | 18 | 29,145,354 | 29,193,385 | 2 | 0 | 2 | 1 |
| Case 4 | 18 | 29,203,385 | 29,848,702 | 1 | 0 | 1 | 0 |
| Case 4 | 18 | 29,848,727 | 29,867,792 | 2 | 0 | 2 | 1 |
| Case 4 | 18 | 29,873,442 | 29,890,229 | 1 | 0 | 1 | 0 |
| Case 4 | 18 | 29,891,604 | 29,920,430 | 2 | 0 | 2 | 1 |
| Case 4 | 18 | 29,930,576 | 31,321,994 | 1 | 0 | 1 | 0 |
| Case 4 | 18 | 31,322,936 | 31,326,171 | 2 | 0 | 2 | 1 |
| Case 4 | 18 | 31,326,415 | 32,951,022 | 1 | 0 | 1 | 0 |
| Case 4 | 18 | 32,958,405 | 32,964,049 | 2 | 0 | 2 | 1 |
| Case 4 | 18 | 32,966,049 | 33,780,013 | 1 | 0 | 1 | 0 |
| Case 4 | 18 | 33,780,020 | 33,783,782 | 2 | 0 | 2 | 1 |
| Case 4 | 18 | 33,785,093 | 33,831,189 | 1 | 0 | 1 | 0 |
| Case 4 | 18 | 33,833,241 | 33,837,495 | 2 | 0 | 2 | 1 |
| Case 4 | 18 | 33,837,688 | 33,865,990 | 1 | 0 | 1 | 0 |
| Case 4 | 18 | 33,866,095 | 33,876,647 | 2 | 0 | 2 | 1 |
| Case 4 | 18 | 33,878,994 | 34,167,147 | 1 | 0 | 1 | 0 |
| Case 4 | 18 | 34,168,043 | 34,174,958 | 2 | 0 | 2 | 1 |
| Case 4 | 18 | 34,178,190 | 34,852,992 | 1 | 0 | 1 | 0 |
| Case 4 | 18 | 34,853,641 | 34,868,736 | 2 | 0 | 2 | 1 |
| Case 4 | 18 | 34,869,401 | 34,908,580 | 1 | 0 | 1 | 0 |
| Case 4 | 18 | 34,909,304 | 34,986,560 | 2 | 0 | 2 | 1 |
| Case 4 | 18 | 34,987,926 | 35,072,150 | 1 | 0 | 1 | 0 |
| Case 4 | 18 | 35,074,482 | 35,108,655 | 2 | 0 | 2 | 1 |
| Case 4 | 18 | 35,113,107 | 35,143,815 | 1 | 0 | 1 | 0 |
| Case 4 | 18 | 35,145,388 | 35,192,683 | 2 | 0 | 2 | 1 |
| Case 4 | 18 | 35,196,346 | 40,499,693 | 1 | 0 | 1 | 0 |
| Case 4 | 18 | 40,510,118 | 40,532,752 | 2 | 0 | 2 | 1 |
| Case 4 | 18 | 40,536,821 | 42,443,004 | 1 | 0 | 1 | 0 |
| Case 4 | 18 | 42,444,473 | 42,468,274 | 2 | 0 | 2 | 1 |
| Case 4 | 18 | 42,473,832 | 42,530,507 | 1 | 0 | 1 | 0 |
| Case 4 | 18 | 42,530,788 | 42,534,584 | 2 | 0 | 2 | 1 |
| Case 4 | 18 | 42,538,724 | 43,232,632 | 1 | 0 | 1 | 0 |
| Case 4 | 18 | 43,234,904 | 43,252,883 | 2 | 0 | 2 | 1 |
| Case 4 | 18 | 43,252,904 | 43,318,644 | 1 | 0 | 1 | 0 |
| Case 4 | 18 | 43,318,746 | 43,329,198 | 2 | 0 | 2 | 1 |
| Case 4 | 18 | 43,329,310 | 44,063,598 | 1 | 0 | 1 | 0 |
| Case 4 | 18 | 44,064,995 | 44,133,946 | 2 | 0 | 2 | 1 |
| Case 4 | 18 | 44,134,163 | 44,168,737 | 1 | 0 | 1 | 0 |
| Case 4 | 18 | 44,170,385 | 44,181,596 | 2 | 0 | 2 | 1 |
| Case 4 | 18 | 44,183,004 | 44,221,971 | 1 | 0 | 1 | 0 |
| Case 4 | 18 | 44,222,589 | 44,250,315 | 2 | 0 | 2 | 1 |
| Case 4 | 18 | 44,250,955 | 44,558,006 | 1 | 0 | 1 | 0 |
| Case 4 | 18 | 44,559,399 | 44,560,693 | 2 | 0 | 2 | 1 |
| Case 4 | 18 | 44,560,732 | 45,631,389 | 1 | 0 | 1 | 0 |
| Case 4 | 18 | 45,631,492 | 45,640,653 | 2 | 0 | 2 | 1 |
| Case 4 | 18 | 45,642,989 | 45,877,135 | 1 | 0 | 1 | 0 |
| Case 4 | 18 | 45,877,425 | 45,901,300 | 2 | 0 | 2 | 1 |
| Case 4 | 18 | 45,901,704 | 45,962,016 | 1 | 0 | 1 | 0 |
| Case 4 | 18 | 45,963,009 | 46,001,659 | 2 | 0 | 2 | 1 |
| Case 4 | 18 | 46,002,758 | 46,281,202 | 1 | 0 | 1 | 0 |
| Case 4 | 18 | 46,281,676 | 46,334,286 | 2 | 0 | 2 | 1 |
| Case 4 | 18 | 46,334,400 | 46,359,024 | 1 | 0 | 1 | 0 |
| Case 4 | 18 | 46,361,441 | 46,413,931 | 2 | 0 | 2 | 1 |
| Case 4 | 18 | 46,419,946 | 46,446,589 | 1 | 0 | 1 | 0 |
| Case 4 | 18 | 46,446,840 | 46,529,127 | 2 | 0 | 2 | 1 |
| Case 4 | 18 | 46,532,088 | 47,010,098 | 1 | 0 | 1 | 0 |
| Case 4 | 18 | 47,013,313 | 47,043,463 | 2 | 0 | 2 | 1 |
| Case 4 | 18 | 47,047,876 | 47,083,106 | 1 | 0 | 1 | 0 |
| Case 4 | 18 | 47,086,932 | 47,095,487 | 2 | 0 | 2 | 1 |
| Case 4 | 18 | 47,095,862 | 47,146,125 | 1 | 0 | 1 | 0 |
| Case 4 | 18 | 47,146,799 | 47,159,090 | 2 | 0 | 2 | 1 |

|        |    |            |            |   |   |   |   |
|--------|----|------------|------------|---|---|---|---|
| Case 4 | 18 | 47,159,917 | 47,179,516 | 1 | 0 | 1 | 0 |
| Case 4 | 18 | 47,182,569 | 47,198,153 | 2 | 0 | 2 | 1 |
| Case 4 | 18 | 47,199,408 | 47,269,486 | 1 | 0 | 1 | 0 |
| Case 4 | 18 | 47,270,975 | 47,317,968 | 2 | 0 | 2 | 1 |
| Case 4 | 18 | 47,318,522 | 47,363,125 | 1 | 0 | 1 | 0 |
| Case 4 | 18 | 47,363,210 | 47,373,516 | 2 | 0 | 2 | 1 |
| Case 4 | 18 | 47,373,530 | 47,429,161 | 1 | 0 | 1 | 0 |
| Case 4 | 18 | 47,431,058 | 47,470,826 | 2 | 0 | 2 | 1 |
| Case 4 | 18 | 47,474,497 | 47,479,491 | 1 | 0 | 1 | 0 |
| Case 4 | 18 | 47,480,761 | 47,482,530 | 2 | 0 | 2 | 1 |
| Case 4 | 18 | 47,483,225 | 47,489,018 | 1 | 0 | 1 | 0 |
| Case 4 | 18 | 47,491,963 | 47,506,918 | 2 | 0 | 2 | 1 |
| Case 4 | 18 | 47,507,608 | 47,548,218 | 1 | 0 | 1 | 0 |
| Case 4 | 18 | 47,551,167 | 47,573,051 | 2 | 0 | 2 | 1 |
| Case 4 | 18 | 47,575,725 | 47,591,368 | 1 | 0 | 1 | 0 |
| Case 4 | 18 | 47,595,537 | 47,600,270 | 2 | 0 | 2 | 1 |
| Case 4 | 18 | 47,602,657 | 47,791,995 | 1 | 0 | 1 | 0 |
| Case 4 | 18 | 47,795,073 | 47,811,305 | 2 | 0 | 2 | 1 |
| Case 4 | 18 | 47,811,374 | 47,964,975 | 1 | 0 | 1 | 0 |
| Case 4 | 18 | 47,967,166 | 47,996,618 | 2 | 0 | 2 | 1 |
| Case 4 | 18 | 48,000,015 | 48,100,072 | 1 | 0 | 1 | 0 |
| Case 4 | 18 | 48,106,595 | 48,127,741 | 2 | 0 | 2 | 1 |
| Case 4 | 18 | 48,130,532 | 48,173,397 | 1 | 0 | 1 | 0 |
| Case 4 | 18 | 48,173,476 | 48,191,559 | 2 | 0 | 2 | 1 |
| Case 4 | 18 | 48,194,641 | 48,230,896 | 1 | 0 | 1 | 0 |
| Case 4 | 18 | 48,233,078 | 48,324,887 | 2 | 0 | 2 | 1 |
| Case 4 | 18 | 48,325,194 | 48,327,718 | 1 | 0 | 1 | 0 |
| Case 4 | 18 | 48,327,769 | 48,346,281 | 2 | 0 | 2 | 1 |
| Case 4 | 18 | 48,347,125 | 49,137,340 | 1 | 0 | 1 | 0 |
| Case 4 | 18 | 49,142,046 | 49,152,441 | 2 | 0 | 2 | 1 |
| Case 4 | 18 | 49,155,040 | 51,623,832 | 1 | 0 | 1 | 0 |
| Case 4 | 18 | 51,642,003 | 51,674,135 | 2 | 0 | 2 | 1 |
| Case 4 | 18 | 51,678,367 | 54,693,531 | 1 | 0 | 1 | 0 |
| Case 4 | 18 | 54,694,151 | 54,762,024 | 2 | 0 | 2 | 1 |
| Case 4 | 18 | 54,763,828 | 55,139,617 | 1 | 0 | 1 | 0 |
| Case 4 | 18 | 55,140,604 | 55,152,944 | 2 | 0 | 2 | 1 |
| Case 4 | 18 | 55,153,371 | 55,783,683 | 1 | 0 | 1 | 0 |
| Case 4 | 18 | 55,786,359 | 55,800,365 | 2 | 0 | 2 | 1 |
| Case 4 | 18 | 55,806,329 | 55,906,519 | 1 | 0 | 1 | 0 |
| Case 4 | 18 | 55,906,899 | 55,929,965 | 2 | 0 | 2 | 1 |
| Case 4 | 18 | 55,931,179 | 55,960,271 | 1 | 0 | 1 | 0 |
| Case 4 | 18 | 55,963,508 | 55,985,124 | 2 | 0 | 2 | 1 |
| Case 4 | 18 | 55,990,881 | 56,033,914 | 1 | 0 | 1 | 0 |
| Case 4 | 18 | 56,037,488 | 56,085,917 | 2 | 0 | 2 | 1 |
| Case 4 | 18 | 56,093,999 | 56,115,386 | 1 | 0 | 1 | 0 |
| Case 4 | 18 | 56,115,825 | 56,203,837 | 2 | 0 | 2 | 1 |
| Case 4 | 18 | 56,203,898 | 56,204,862 | 1 | 0 | 1 | 0 |
| Case 4 | 18 | 56,204,932 | 56,219,590 | 2 | 0 | 2 | 1 |
| Case 4 | 18 | 56,221,422 | 56,246,437 | 1 | 0 | 1 | 0 |
| Case 4 | 18 | 56,246,450 | 56,247,152 | 2 | 0 | 2 | 1 |
| Case 4 | 18 | 56,247,180 | 56,444,821 | 1 | 0 | 1 | 0 |
| Case 4 | 18 | 56,445,257 | 56,468,061 | 2 | 0 | 2 | 1 |
| Case 4 | 18 | 56,471,617 | 56,702,945 | 1 | 0 | 1 | 0 |
| Case 4 | 18 | 56,705,616 | 56,730,717 | 2 | 0 | 2 | 1 |
| Case 4 | 18 | 56,732,513 | 56,852,972 | 1 | 0 | 1 | 0 |
| Case 4 | 18 | 56,855,621 | 56,882,326 | 2 | 0 | 2 | 1 |
| Case 4 | 18 | 56,883,319 | 57,136,354 | 1 | 0 | 1 | 0 |
| Case 4 | 18 | 57,136,725 | 57,137,703 | 2 | 0 | 2 | 1 |
| Case 4 | 18 | 57,138,042 | 57,323,879 | 1 | 0 | 1 | 0 |
| Case 4 | 18 | 57,331,658 | 57,372,654 | 2 | 0 | 2 | 1 |
| Case 4 | 18 | 57,376,365 | 58,038,332 | 1 | 0 | 1 | 0 |



|        |    |            |            |   |   |   |   |
|--------|----|------------|------------|---|---|---|---|
| Case 4 | 18 | 58,038,777 | 58,039,478 | 2 | 0 | 2 | 1 |
| Case 4 | 18 | 58,039,760 | 58,322,781 | 1 | 0 | 1 | 0 |
| Case 4 | 18 | 58,324,321 | 58,342,734 | 2 | 0 | 2 | 1 |
| Case 4 | 18 | 58,349,027 | 59,262,689 | 1 | 0 | 1 | 0 |
| Case 4 | 18 | 59,262,831 | 59,274,791 | 2 | 0 | 2 | 1 |
| Case 4 | 18 | 59,275,480 | 59,515,764 | 1 | 0 | 1 | 0 |
| Case 4 | 18 | 59,521,666 | 59,547,778 | 2 | 0 | 2 | 1 |
| Case 4 | 18 | 59,548,975 | 59,613,278 | 1 | 0 | 1 | 0 |
| Case 4 | 18 | 59,619,843 | 59,652,396 | 2 | 0 | 2 | 1 |
| Case 4 | 18 | 59,657,583 | 59,984,822 | 1 | 0 | 1 | 0 |
| Case 4 | 18 | 59,997,434 | 60,021,761 | 2 | 0 | 2 | 1 |
| Case 4 | 18 | 60,023,794 | 60,102,383 | 1 | 0 | 1 | 0 |
| Case 4 | 18 | 60,104,170 | 60,111,237 | 2 | 0 | 2 | 1 |
| Case 4 | 18 | 60,111,781 | 60,672,468 | 1 | 0 | 1 | 0 |
| Case 4 | 18 | 60,673,791 | 60,690,246 | 2 | 0 | 2 | 1 |
| Case 4 | 18 | 60,691,723 | 60,922,851 | 1 | 0 | 1 | 0 |
| Case 4 | 18 | 60,926,161 | 60,943,551 | 2 | 0 | 2 | 1 |
| Case 4 | 18 | 60,947,111 | 61,251,444 | 1 | 0 | 1 | 0 |
| Case 4 | 18 | 61,253,490 | 61,260,157 | 2 | 0 | 2 | 1 |
| Case 4 | 18 | 61,260,167 | 61,388,143 | 1 | 0 | 1 | 0 |
| Case 4 | 18 | 61,389,943 | 61,394,140 | 2 | 0 | 2 | 1 |
| Case 4 | 18 | 61,398,078 | 63,025,746 | 1 | 0 | 1 | 0 |
| Case 4 | 18 | 63,030,638 | 63,031,248 | 2 | 0 | 2 | 1 |
| Case 4 | 18 | 63,031,505 | 67,391,909 | 1 | 0 | 1 | 0 |
| Case 4 | 18 | 67,392,298 | 67,404,128 | 2 | 0 | 2 | 1 |
| Case 4 | 18 | 67,406,840 | 67,869,834 | 1 | 0 | 1 | 0 |
| Case 4 | 18 | 67,871,343 | 67,877,560 | 2 | 0 | 2 | 1 |
| Case 4 | 18 | 67,880,403 | 67,902,991 | 1 | 0 | 1 | 0 |
| Case 4 | 18 | 67,913,141 | 67,920,869 | 2 | 0 | 2 | 1 |
| Case 4 | 18 | 67,934,379 | 68,062,834 | 1 | 0 | 1 | 0 |
| Case 4 | 18 | 68,062,874 | 68,096,748 | 2 | 0 | 2 | 1 |
| Case 4 | 18 | 68,103,850 | 68,446,262 | 1 | 0 | 1 | 0 |
| Case 4 | 18 | 68,449,616 | 68,491,824 | 2 | 0 | 2 | 1 |
| Case 4 | 18 | 68,497,445 | 71,381,332 | 1 | 0 | 1 | 0 |
| Case 4 | 18 | 71,382,855 | 71,383,800 | 2 | 0 | 2 | 1 |
| Case 4 | 18 | 71,385,891 | 71,402,735 | 1 | 0 | 1 | 0 |
| Case 4 | 18 | 71,403,342 | 71,412,693 | 2 | 0 | 2 | 1 |
| Case 4 | 18 | 71,414,167 | 71,486,616 | 1 | 0 | 1 | 0 |
| Case 4 | 18 | 71,487,700 | 71,507,880 | 2 | 0 | 2 | 1 |
| Case 4 | 18 | 71,509,006 | 71,879,183 | 1 | 0 | 1 | 0 |
| Case 4 | 18 | 71,882,535 | 71,920,841 | 2 | 0 | 2 | 1 |
| Case 4 | 18 | 71,922,519 | 72,076,567 | 1 | 0 | 1 | 0 |
| Case 4 | 18 | 72,078,423 | 72,113,201 | 2 | 0 | 2 | 1 |
| Case 4 | 18 | 72,114,038 | 72,173,245 | 1 | 0 | 1 | 0 |
| Case 4 | 18 | 72,174,701 | 72,187,612 | 2 | 0 | 2 | 1 |
| Case 4 | 18 | 72,188,347 | 72,228,136 | 1 | 0 | 1 | 0 |
| Case 4 | 18 | 72,228,269 | 72,252,137 | 2 | 0 | 2 | 1 |
| Case 4 | 18 | 72,253,738 | 72,734,429 | 1 | 0 | 1 | 0 |
| Case 4 | 18 | 72,738,855 | 72,775,691 | 2 | 0 | 2 | 1 |
| Case 4 | 18 | 72,775,754 | 72,785,291 | 1 | 0 | 1 | 0 |
| Case 4 | 18 | 72,786,303 | 72,802,103 | 2 | 0 | 2 | 1 |
| Case 4 | 18 | 72,802,124 | 72,866,264 | 1 | 0 | 1 | 0 |
| Case 4 | 18 | 72,866,273 | 72,914,003 | 2 | 0 | 2 | 1 |
| Case 4 | 18 | 72,914,075 | 72,983,960 | 1 | 0 | 1 | 0 |
| Case 4 | 18 | 72,984,180 | 73,000,088 | 2 | 0 | 2 | 1 |
| Case 4 | 18 | 73,000,141 | 73,089,473 | 1 | 0 | 1 | 0 |
| Case 4 | 18 | 73,089,860 | 73,098,790 | 2 | 0 | 2 | 1 |
| Case 4 | 18 | 73,099,691 | 73,855,671 | 1 | 0 | 1 | 0 |
| Case 4 | 18 | 73,856,073 | 73,869,836 | 2 | 0 | 2 | 1 |
| Case 4 | 18 | 73,870,880 | 74,091,393 | 1 | 0 | 1 | 0 |
| Case 4 | 18 | 74,091,434 | 74,091,961 | 2 | 0 | 2 | 1 |

|        |    |             |             |   |   |   |   |
|--------|----|-------------|-------------|---|---|---|---|
| Case 4 | 18 | 74,091,962  | 74,271,486  | 1 | 0 | 1 | 0 |
| Case 4 | 18 | 74,273,213  | 74,291,344  | 2 | 0 | 2 | 1 |
| Case 4 | 18 | 74,291,756  | 74,726,712  | 1 | 0 | 1 | 0 |
| Case 4 | 18 | 74,727,631  | 74,737,942  | 2 | 0 | 2 | 1 |
| Case 4 | 18 | 74,739,022  | 74,765,400  | 1 | 0 | 1 | 0 |
| Case 4 | 18 | 74,768,504  | 74,779,866  | 2 | 0 | 2 | 1 |
| Case 4 | 18 | 74,782,069  | 74,892,855  | 1 | 0 | 1 | 0 |
| Case 4 | 18 | 74,894,653  | 74,900,914  | 2 | 0 | 2 | 1 |
| Case 4 | 18 | 74,904,461  | 74,954,477  | 1 | 0 | 1 | 0 |
| Case 4 | 18 | 74,955,217  | 74,966,206  | 2 | 0 | 2 | 1 |
| Case 4 | 18 | 74,967,894  | 76,326,716  | 1 | 0 | 1 | 0 |
| Case 4 | 18 | 76,337,612  | 76,368,437  | 2 | 0 | 2 | 1 |
| Case 4 | 18 | 76,369,138  | 77,171,061  | 1 | 0 | 1 | 0 |
| Case 4 | 18 | 77,171,089  | 77,227,918  | 2 | 0 | 2 | 1 |
| Case 4 | 18 | 77,230,409  | 77,343,164  | 1 | 0 | 1 | 0 |
| Case 4 | 18 | 77,346,682  | 77,400,047  | 2 | 0 | 2 | 1 |
| Case 4 | 18 | 77,405,529  | 77,802,196  | 1 | 0 | 1 | 0 |
| Case 4 | 18 | 77,804,233  | 77,806,070  | 2 | 0 | 2 | 1 |
| Case 4 | 18 | 77,813,395  | 78,015,180  | 1 | 0 | 1 | 0 |
| Case 4 | 19 | 260,912     | 9,054,279   | 1 | 1 | 2 | 0 |
| Case 4 | 19 | 9,056,232   | 9,056,233   | 1 | 0 | 1 | 0 |
| Case 4 | 19 | 9,056,616   | 24,629,285  | 1 | 1 | 2 | 0 |
| Case 4 | 19 | 27,732,159  | 41,355,999  | 1 | 1 | 2 | 0 |
| Case 4 | 19 | 41,356,054  | 41,365,095  | 1 | 0 | 1 | 0 |
| Case 4 | 19 | 41,379,148  | 55,294,329  | 1 | 1 | 2 | 0 |
| Case 4 | 19 | 55,315,347  | 55,332,601  | 1 | 0 | 1 | 0 |
| Case 4 | 19 | 55,346,544  | 59,097,160  | 1 | 1 | 2 | 0 |
| Case 4 | 20 | 63,244      | 26,293,985  | 1 | 1 | 2 | 0 |
| Case 4 | 20 | 29,425,357  | 62,948,788  | 1 | 1 | 2 | 0 |
| Case 4 | 21 | 10,827,533  | 10,906,936  | 1 | 1 | 2 | 0 |
| Case 4 | 21 | 10,908,848  | 10,916,412  | 1 | 0 | 1 | 0 |
| Case 4 | 21 | 10,916,435  | 10,971,337  | 1 | 1 | 2 | 0 |
| Case 4 | 21 | 14,368,320  | 23,654,246  | 1 | 1 | 2 | 0 |
| Case 4 | 21 | 23,655,900  | 23,661,835  | 1 | 0 | 1 | 0 |
| Case 4 | 21 | 23,672,710  | 48,100,155  | 1 | 1 | 2 | 0 |
| Case 4 | 22 | 16,114,244  | 26,769,308  | 1 | 1 | 2 | 0 |
| Case 4 | 22 | 26,769,441  | 51,195,728  | 2 | 0 | 2 | 1 |
| Case 6 | 1  | 82,154      | 39,581,931  | 1 | 1 | 2 | 0 |
| Case 6 | 1  | 39,583,686  | 39,963,873  | 1 | 0 | 1 | 0 |
| Case 6 | 1  | 39,965,761  | 121,346,616 | 1 | 1 | 2 | 0 |
| Case 6 | 1  | 142,649,718 | 227,834,400 | 1 | 1 | 2 | 0 |
| Case 6 | 1  | 227,839,384 | 227,843,423 | 0 | 0 | 0 | 0 |
| Case 6 | 1  | 227,862,055 | 236,714,064 | 1 | 1 | 2 | 0 |
| Case 6 | 1  | 236,716,888 | 236,793,400 | 1 | 0 | 1 | 0 |
| Case 6 | 1  | 236,796,979 | 247,012,943 | 1 | 1 | 2 | 0 |
| Case 6 | 1  | 247,013,492 | 247,320,868 | 1 | 0 | 1 | 0 |
| Case 6 | 1  | 247,322,344 | 249,218,992 | 1 | 1 | 2 | 0 |
| Case 6 | 2  | 18,674      | 73,613,030  | 1 | 1 | 2 | 0 |
| Case 6 | 2  | 73,613,031  | 73,718,084  | 1 | 0 | 1 | 0 |
| Case 6 | 2  | 73,718,231  | 92,081,640  | 1 | 1 | 2 | 0 |
| Case 6 | 2  | 95,429,424  | 135,744,007 | 1 | 1 | 2 | 0 |
| Case 6 | 2  | 135,744,019 | 136,462,661 | 1 | 0 | 1 | 0 |
| Case 6 | 2  | 136,467,791 | 152,127,340 | 1 | 1 | 2 | 0 |
| Case 6 | 2  | 152,128,196 | 152,375,532 | 1 | 0 | 1 | 0 |
| Case 6 | 2  | 152,376,170 | 170,356,065 | 1 | 1 | 2 | 0 |
| Case 6 | 2  | 170,359,113 | 170,592,709 | 1 | 0 | 1 | 0 |
| Case 6 | 2  | 170,594,091 | 196,545,348 | 1 | 1 | 2 | 0 |
| Case 6 | 2  | 196,545,710 | 196,894,770 | 1 | 0 | 1 | 0 |
| Case 6 | 2  | 196,912,067 | 201,407,372 | 1 | 1 | 2 | 0 |
| Case 6 | 2  | 201,412,611 | 201,438,376 | 0 | 0 | 0 | 0 |
| Case 6 | 2  | 201,438,497 | 243,048,760 | 1 | 1 | 2 | 0 |

|        |   |             |             |   |   |   |   |
|--------|---|-------------|-------------|---|---|---|---|
| Case 6 | 3 | 61,495      | 44,609,875  | 1 | 1 | 2 | 0 |
| Case 6 | 3 | 44,611,558  | 44,905,834  | 1 | 0 | 1 | 0 |
| Case 6 | 3 | 44,906,575  | 90,128,803  | 1 | 1 | 2 | 0 |
| Case 6 | 3 | 90,138,312  | 90,442,925  | 1 | 0 | 1 | 0 |
| Case 6 | 3 | 93,537,290  | 93,935,874  | 1 | 0 | 1 | 0 |
| Case 6 | 3 | 93,946,101  | 121,414,061 | 1 | 1 | 2 | 0 |
| Case 6 | 3 | 121,414,165 | 121,658,376 | 1 | 0 | 1 | 0 |
| Case 6 | 3 | 121,659,197 | 180,320,969 | 1 | 1 | 2 | 0 |
| Case 6 | 3 | 180,321,090 | 180,433,154 | 1 | 0 | 1 | 0 |
| Case 6 | 3 | 180,433,381 | 197,838,262 | 1 | 1 | 2 | 0 |
| Case 6 | 4 | 71,566      | 75,174      | 1 | 1 | 2 | 0 |
| Case 6 | 4 | 85,422      | 515,489     | 1 | 0 | 1 | 0 |
| Case 6 | 4 | 515,503     | 2,073,958   | 1 | 1 | 2 | 0 |
| Case 6 | 4 | 2,074,526   | 2,306,339   | 1 | 0 | 1 | 0 |
| Case 6 | 4 | 2,306,356   | 49,620,898  | 1 | 1 | 2 | 0 |
| Case 6 | 4 | 52,697,856  | 56,596,987  | 1 | 1 | 2 | 0 |
| Case 6 | 4 | 56,599,963  | 56,924,685  | 1 | 0 | 1 | 0 |
| Case 6 | 4 | 56,945,325  | 83,765,632  | 1 | 1 | 2 | 0 |
| Case 6 | 4 | 83,765,643  | 84,374,630  | 1 | 0 | 1 | 0 |
| Case 6 | 4 | 84,374,657  | 113,434,057 | 1 | 1 | 2 | 0 |
| Case 6 | 4 | 113,435,847 | 113,609,023 | 1 | 0 | 1 | 0 |
| Case 6 | 4 | 113,617,694 | 190,963,766 | 1 | 1 | 2 | 0 |
| Case 6 | 5 | 38,139      | 31,656,439  | 1 | 1 | 2 | 0 |
| Case 6 | 5 | 31,657,098  | 32,035,855  | 2 | 1 | 3 | 0 |
| Case 6 | 5 | 32,037,337  | 33,832,015  | 1 | 1 | 2 | 0 |
| Case 6 | 5 | 33,835,353  | 34,757,670  | 2 | 1 | 3 | 0 |
| Case 6 | 5 | 34,758,301  | 37,696,178  | 1 | 1 | 2 | 0 |
| Case 6 | 5 | 37,697,814  | 40,025,962  | 2 | 1 | 3 | 0 |
| Case 6 | 5 | 40,027,012  | 41,895,460  | 3 | 1 | 4 | 0 |
| Case 6 | 5 | 41,898,342  | 45,840,303  | 3 | 0 | 3 | 1 |
| Case 6 | 5 | 45,841,630  | 46,399,093  | 1 | 1 | 2 | 0 |
| Case 6 | 5 | 49,457,282  | 77,359,088  | 1 | 1 | 2 | 0 |
| Case 6 | 5 | 77,389,973  | 77,616,951  | 1 | 0 | 1 | 0 |
| Case 6 | 5 | 77,618,179  | 79,029,594  | 1 | 1 | 2 | 0 |
| Case 6 | 5 | 79,029,675  | 79,047,891  | 1 | 0 | 1 | 0 |
| Case 6 | 5 | 79,048,562  | 79,598,589  | 1 | 1 | 2 | 0 |
| Case 6 | 5 | 79,600,508  | 80,164,943  | 1 | 0 | 1 | 0 |
| Case 6 | 5 | 80,168,005  | 137,088,234 | 1 | 1 | 2 | 0 |
| Case 6 | 5 | 137,088,945 | 137,523,527 | 1 | 0 | 1 | 0 |
| Case 6 | 5 | 137,525,322 | 139,931,652 | 1 | 1 | 2 | 0 |
| Case 6 | 5 | 139,931,653 | 139,931,739 | 7 | 0 | 7 | 1 |
| Case 6 | 5 | 139,931,740 | 180,693,127 | 1 | 1 | 2 | 0 |
| Case 6 | 6 | 108,666     | 32,212,985  | 1 | 1 | 2 | 0 |
| Case 6 | 6 | 32,213,008  | 32,453,191  | 1 | 0 | 1 | 0 |
| Case 6 | 6 | 32,487,416  | 32,651,117  | 1 | 1 | 2 | 0 |
| Case 6 | 6 | 32,651,894  | 32,765,182  | 1 | 0 | 1 | 0 |
| Case 6 | 6 | 32,765,451  | 33,025,700  | 1 | 1 | 2 | 0 |
| Case 6 | 6 | 33,026,110  | 33,053,640  | 3 | 0 | 3 | 1 |
| Case 6 | 6 | 33,053,682  | 58,752,089  | 1 | 1 | 2 | 0 |
| Case 6 | 6 | 61,891,118  | 170,980,171 | 1 | 1 | 2 | 0 |
| Case 6 | 7 | 44,935      | 2,566,503   | 2 | 0 | 2 | 1 |
| Case 6 | 7 | 2,566,518   | 2,625,862   | 1 | 1 | 2 | 0 |
| Case 6 | 7 | 2,625,966   | 4,370,566   | 2 | 1 | 3 | 0 |
| Case 6 | 7 | 4,371,785   | 7,670,797   | 2 | 0 | 2 | 1 |
| Case 6 | 7 | 7,672,023   | 7,795,531   | 1 | 1 | 2 | 0 |
| Case 6 | 7 | 7,796,495   | 17,359,594  | 2 | 1 | 3 | 0 |
| Case 6 | 7 | 17,360,302  | 17,407,061  | 1 | 1 | 2 | 0 |
| Case 6 | 7 | 17,425,895  | 17,467,225  | 7 | 0 | 7 | 1 |
| Case 6 | 7 | 17,472,677  | 17,478,578  | 1 | 1 | 2 | 0 |
| Case 6 | 7 | 17,480,994  | 19,003,032  | 2 | 1 | 3 | 0 |
| Case 6 | 7 | 19,007,884  | 20,754,975  | 2 | 0 | 2 | 1 |

|        |    |             |             |   |   |   |   |
|--------|----|-------------|-------------|---|---|---|---|
| Case 6 | 7  | 20,761,221  | 20,970,137  | 1 | 1 | 2 | 0 |
| Case 6 | 7  | 20,972,111  | 22,767,206  | 2 | 1 | 3 | 0 |
| Case 6 | 7  | 22,767,433  | 24,058,149  | 1 | 1 | 2 | 0 |
| Case 6 | 7  | 24,061,417  | 43,635,671  | 2 | 1 | 3 | 0 |
| Case 6 | 7  | 43,643,835  | 43,643,835  | 2 | 0 | 2 | 1 |
| Case 6 | 7  | 43,647,859  | 45,161,049  | 1 | 1 | 2 | 0 |
| Case 6 | 7  | 45,165,116  | 47,849,120  | 2 | 1 | 3 | 0 |
| Case 6 | 7  | 47,851,455  | 48,451,950  | 1 | 1 | 2 | 0 |
| Case 6 | 7  | 48,451,975  | 52,131,514  | 2 | 1 | 3 | 0 |
| Case 6 | 7  | 52,135,471  | 57,878,853  | 1 | 1 | 2 | 0 |
| Case 6 | 7  | 57,882,950  | 58,019,061  | 1 | 0 | 1 | 0 |
| Case 6 | 7  | 61,056,053  | 64,389,089  | 1 | 0 | 1 | 0 |
| Case 6 | 7  | 64,393,948  | 64,541,586  | 1 | 1 | 2 | 0 |
| Case 6 | 7  | 64,566,009  | 65,202,326  | 0 | 0 | 0 | 0 |
| Case 6 | 7  | 65,203,587  | 100,676,409 | 1 | 1 | 2 | 0 |
| Case 6 | 7  | 100,676,463 | 100,679,754 | 1 | 0 | 1 | 0 |
| Case 6 | 7  | 100,679,760 | 100,685,103 | 0 | 0 | 0 | 0 |
| Case 6 | 7  | 100,685,196 | 100,685,612 | 1 | 0 | 1 | 0 |
| Case 6 | 7  | 100,685,634 | 149,548,591 | 1 | 1 | 2 | 0 |
| Case 6 | 7  | 149,551,993 | 149,787,501 | 7 | 0 | 7 | 1 |
| Case 6 | 7  | 149,806,076 | 159,119,486 | 1 | 1 | 2 | 0 |
| Case 6 | 8  | 164,984     | 195,607     | 1 | 1 | 2 | 0 |
| Case 6 | 8  | 195,679     | 196,274     | 0 | 0 | 0 | 0 |
| Case 6 | 8  | 196,327     | 27,633,972  | 1 | 1 | 2 | 0 |
| Case 6 | 8  | 27,634,004  | 27,645,704  | 0 | 0 | 0 | 0 |
| Case 6 | 8  | 27,649,495  | 43,791,691  | 1 | 1 | 2 | 0 |
| Case 6 | 8  | 46,886,735  | 118,284,380 | 1 | 1 | 2 | 0 |
| Case 6 | 8  | 118,288,747 | 119,209,187 | 2 | 1 | 3 | 0 |
| Case 6 | 8  | 119,209,773 | 146,293,414 | 1 | 1 | 2 | 0 |
| Case 6 | 9  | 46,587      | 2,072,470   | 1 | 1 | 2 | 0 |
| Case 6 | 9  | 2,073,292   | 2,301,692   | 2 | 1 | 3 | 0 |
| Case 6 | 9  | 2,302,693   | 3,593,961   | 1 | 1 | 2 | 0 |
| Case 6 | 9  | 3,594,049   | 4,088,934   | 2 | 1 | 3 | 0 |
| Case 6 | 9  | 4,089,046   | 7,408,763   | 1 | 1 | 2 | 0 |
| Case 6 | 9  | 7,411,160   | 7,949,546   | 2 | 1 | 3 | 0 |
| Case 6 | 9  | 7,951,024   | 12,351,464  | 1 | 1 | 2 | 0 |
| Case 6 | 9  | 12,352,035  | 13,150,558  | 2 | 1 | 3 | 0 |
| Case 6 | 9  | 13,150,616  | 16,020,997  | 1 | 1 | 2 | 0 |
| Case 6 | 9  | 16,022,910  | 16,629,024  | 2 | 1 | 3 | 0 |
| Case 6 | 9  | 16,629,923  | 18,301,446  | 1 | 1 | 2 | 0 |
| Case 6 | 9  | 18,302,439  | 18,927,768  | 2 | 1 | 3 | 0 |
| Case 6 | 9  | 18,927,818  | 20,032,728  | 1 | 1 | 2 | 0 |
| Case 6 | 9  | 20,033,087  | 20,273,783  | 2 | 1 | 3 | 0 |
| Case 6 | 9  | 20,273,793  | 46,944,322  | 1 | 1 | 2 | 0 |
| Case 6 | 9  | 65,629,772  | 95,062,278  | 1 | 1 | 2 | 0 |
| Case 6 | 9  | 95,063,947  | 95,218,599  | 1 | 0 | 1 | 0 |
| Case 6 | 9  | 95,218,829  | 99,521,119  | 1 | 1 | 2 | 0 |
| Case 6 | 9  | 99,521,123  | 99,522,706  | 0 | 0 | 0 | 0 |
| Case 6 | 9  | 99,525,487  | 135,934,431 | 1 | 1 | 2 | 0 |
| Case 6 | 9  | 135,940,433 | 135,955,672 | 7 | 0 | 7 | 1 |
| Case 6 | 9  | 135,957,091 | 141,066,491 | 1 | 1 | 2 | 0 |
| Case 6 | 10 | 98,087      | 27,264,859  | 1 | 1 | 2 | 0 |
| Case 6 | 10 | 27,265,641  | 27,508,758  | 1 | 0 | 1 | 0 |
| Case 6 | 10 | 27,512,335  | 38,304,186  | 1 | 1 | 2 | 0 |
| Case 6 | 10 | 38,314,056  | 39,097,912  | 1 | 0 | 1 | 0 |
| Case 6 | 10 | 42,436,301  | 43,341,105  | 1 | 0 | 1 | 0 |
| Case 6 | 10 | 43,341,976  | 64,893,433  | 1 | 1 | 2 | 0 |
| Case 6 | 10 | 64,894,047  | 65,370,041  | 1 | 0 | 1 | 0 |
| Case 6 | 10 | 65,376,395  | 91,488,979  | 1 | 1 | 2 | 0 |
| Case 6 | 10 | 91,490,087  | 91,514,423  | 0 | 0 | 0 | 0 |
| Case 6 | 10 | 91,518,638  | 93,501,876  | 1 | 1 | 2 | 0 |

|        |    |             |             |   |   |   |   |
|--------|----|-------------|-------------|---|---|---|---|
| Case 6 | 10 | 93,526,562  | 94,805,665  | 1 | 0 | 1 | 0 |
| Case 6 | 10 | 94,809,609  | 105,883,395 | 1 | 1 | 2 | 0 |
| Case 6 | 10 | 105,883,704 | 106,031,030 | 1 | 0 | 1 | 0 |
| Case 6 | 10 | 106,031,195 | 135,348,026 | 1 | 1 | 2 | 0 |
| Case 6 | 10 | 135,348,257 | 135,477,883 | 1 | 0 | 1 | 0 |
| Case 6 | 11 | 193,146     | 7,799,392   | 1 | 1 | 2 | 0 |
| Case 6 | 11 | 7,801,547   | 7,846,941   | 0 | 0 | 0 | 0 |
| Case 6 | 11 | 7,846,999   | 50,237,640  | 1 | 1 | 2 | 0 |
| Case 6 | 11 | 50,238,588  | 51,411,542  | 1 | 0 | 1 | 0 |
| Case 6 | 11 | 51,411,543  | 51,591,253  | 1 | 1 | 2 | 0 |
| Case 6 | 11 | 54,794,237  | 81,498,152  | 1 | 1 | 2 | 0 |
| Case 6 | 11 | 81,503,992  | 81,525,713  | 0 | 0 | 0 | 0 |
| Case 6 | 11 | 81,526,573  | 102,877,513 | 1 | 1 | 2 | 0 |
| Case 6 | 11 | 102,877,651 | 103,185,959 | 1 | 0 | 1 | 0 |
| Case 6 | 11 | 103,190,054 | 108,057,226 | 1 | 1 | 2 | 0 |
| Case 6 | 11 | 108,057,279 | 108,332,267 | 1 | 0 | 1 | 0 |
| Case 6 | 11 | 108,333,536 | 134,934,063 | 1 | 1 | 2 | 0 |
| Case 6 | 12 | 191,619     | 21,045,152  | 1 | 1 | 2 | 0 |
| Case 6 | 12 | 21,045,694  | 21,408,845  | 1 | 0 | 1 | 0 |
| Case 6 | 12 | 21,409,295  | 34,181,011  | 1 | 1 | 2 | 0 |
| Case 6 | 12 | 34,184,679  | 34,853,011  | 1 | 0 | 1 | 0 |
| Case 6 | 12 | 37,876,400  | 38,514,872  | 1 | 0 | 1 | 0 |
| Case 6 | 12 | 38,528,487  | 123,794,022 | 1 | 1 | 2 | 0 |
| Case 6 | 12 | 123,794,097 | 124,134,802 | 1 | 0 | 1 | 0 |
| Case 6 | 12 | 124,136,607 | 133,728,485 | 1 | 1 | 2 | 0 |
| Case 6 | 12 | 133,729,999 | 133,810,935 | 1 | 0 | 1 | 0 |
| Case 6 | 13 | 19,058,717  | 35,474,185  | 1 | 1 | 2 | 0 |
| Case 6 | 13 | 35,488,617  | 36,006,522  | 1 | 0 | 1 | 0 |
| Case 6 | 13 | 36,009,566  | 96,370,293  | 1 | 1 | 2 | 0 |
| Case 6 | 13 | 96,374,386  | 96,676,124  | 1 | 0 | 1 | 0 |
| Case 6 | 13 | 96,690,806  | 115,103,529 | 1 | 1 | 2 | 0 |
| Case 6 | 14 | 19,280,733  | 19,964,076  | 1 | 1 | 2 | 0 |
| Case 6 | 14 | 20,213,937  | 20,416,499  | 3 | 0 | 3 | 1 |
| Case 6 | 14 | 20,420,338  | 22,536,071  | 1 | 1 | 2 | 0 |
| Case 6 | 14 | 22,536,550  | 22,970,327  | 2 | 2 | 4 | 0 |
| Case 6 | 14 | 22,972,815  | 39,519,415  | 1 | 1 | 2 | 0 |
| Case 6 | 14 | 39,530,997  | 39,871,004  | 1 | 0 | 1 | 0 |
| Case 6 | 14 | 39,893,535  | 45,403,459  | 1 | 1 | 2 | 0 |
| Case 6 | 14 | 45,403,679  | 45,696,948  | 1 | 0 | 1 | 0 |
| Case 6 | 14 | 45,699,237  | 58,719,699  | 1 | 1 | 2 | 0 |
| Case 6 | 14 | 58,727,738  | 59,039,168  | 1 | 0 | 1 | 0 |
| Case 6 | 14 | 59,040,191  | 63,991,111  | 1 | 1 | 2 | 0 |
| Case 6 | 14 | 63,994,731  | 64,536,699  | 1 | 0 | 1 | 0 |
| Case 6 | 14 | 64,536,713  | 92,439,059  | 1 | 1 | 2 | 0 |
| Case 6 | 14 | 92,439,123  | 92,471,963  | 0 | 0 | 0 | 0 |
| Case 6 | 14 | 92,472,017  | 92,477,364  | 1 | 0 | 1 | 0 |
| Case 6 | 14 | 92,477,376  | 96,738,473  | 1 | 1 | 2 | 0 |
| Case 6 | 14 | 96,739,847  | 96,846,092  | 1 | 0 | 1 | 0 |
| Case 6 | 14 | 96,848,757  | 107,287,663 | 1 | 1 | 2 | 0 |
| Case 6 | 15 | 20,034,919  | 20,191,741  | 1 | 1 | 2 | 0 |
| Case 6 | 15 | 20,192,086  | 22,410,067  | 0 | 0 | 0 | 0 |
| Case 6 | 15 | 22,427,966  | 72,174,611  | 1 | 1 | 2 | 0 |
| Case 6 | 15 | 72,175,950  | 72,366,667  | 1 | 0 | 1 | 0 |
| Case 6 | 15 | 72,368,847  | 102,461,162 | 1 | 1 | 2 | 0 |
| Case 6 | 16 | 88,165      | 1,397,597   | 1 | 1 | 2 | 0 |
| Case 6 | 16 | 1,397,698   | 1,918,157   | 1 | 0 | 1 | 0 |
| Case 6 | 16 | 1,926,642   | 28,608,487  | 1 | 1 | 2 | 0 |
| Case 6 | 16 | 28,615,243  | 28,620,752  | 7 | 0 | 7 | 1 |
| Case 6 | 16 | 28,628,143  | 35,285,582  | 1 | 1 | 2 | 0 |
| Case 6 | 16 | 46,450,037  | 90,274,695  | 1 | 1 | 2 | 0 |
| Case 6 | 17 | 11,885      | 10,295,924  | 1 | 1 | 2 | 0 |

|         |    |            |            |   |   |   |   |
|---------|----|------------|------------|---|---|---|---|
| Case 6  | 17 | 10,295,963 | 10,438,691 | 1 | 0 | 1 | 0 |
| Case 6  | 17 | 10,440,380 | 22,242,355 | 1 | 1 | 2 | 0 |
| Case 6  | 17 | 25,268,142 | 59,913,158 | 1 | 1 | 2 | 0 |
| Case 6  | 17 | 59,914,915 | 60,631,102 | 1 | 0 | 1 | 0 |
| Case 6  | 17 | 60,651,381 | 81,060,040 | 1 | 1 | 2 | 0 |
| Case 6  | 18 | 87,505     | 9,254,308  | 1 | 1 | 2 | 0 |
| Case 6  | 18 | 9,254,406  | 9,264,690  | 1 | 0 | 1 | 0 |
| Case 6  | 18 | 9,278,180  | 15,375,878 | 1 | 1 | 2 | 0 |
| Case 6  | 18 | 18,520,354 | 78,015,180 | 1 | 1 | 2 | 0 |
| Case 6  | 19 | 260,912    | 2,833,943  | 1 | 1 | 2 | 0 |
| Case 6  | 19 | 2,834,080  | 2,939,396  | 1 | 0 | 1 | 0 |
| Case 6  | 19 | 2,947,152  | 9,203,994  | 1 | 1 | 2 | 0 |
| Case 6  | 19 | 9,204,038  | 9,921,657  | 1 | 0 | 1 | 0 |
| Case 6  | 19 | 9,921,708  | 11,710,309 | 1 | 1 | 2 | 0 |
| Case 6  | 19 | 11,712,531 | 12,738,543 | 1 | 0 | 1 | 0 |
| Case 6  | 19 | 12,738,882 | 19,772,497 | 1 | 1 | 2 | 0 |
| Case 6  | 19 | 19,772,856 | 19,824,850 | 0 | 0 | 0 | 0 |
| Case 6  | 19 | 19,842,053 | 20,497,400 | 1 | 1 | 2 | 0 |
| Case 6  | 19 | 20,499,493 | 20,808,384 | 0 | 0 | 0 | 0 |
| Case 6  | 19 | 20,809,176 | 21,009,030 | 1 | 1 | 2 | 0 |
| Case 6  | 19 | 21,009,270 | 24,629,285 | 1 | 0 | 1 | 0 |
| Case 6  | 19 | 27,732,159 | 28,101,122 | 1 | 0 | 1 | 0 |
| Case 6  | 19 | 28,127,201 | 36,674,347 | 1 | 1 | 2 | 0 |
| Case 6  | 19 | 36,674,390 | 38,167,971 | 1 | 0 | 1 | 0 |
| Case 6  | 19 | 38,168,913 | 40,502,943 | 1 | 1 | 2 | 0 |
| Case 6  | 19 | 40,513,191 | 40,657,509 | 0 | 0 | 0 | 0 |
| Case 6  | 19 | 40,658,577 | 41,341,589 | 1 | 1 | 2 | 0 |
| Case 6  | 19 | 41,350,895 | 41,463,489 | 0 | 0 | 0 | 0 |
| Case 6  | 19 | 41,465,130 | 44,350,718 | 1 | 1 | 2 | 0 |
| Case 6  | 19 | 44,350,728 | 44,986,702 | 1 | 0 | 1 | 0 |
| Case 6  | 19 | 44,988,639 | 52,490,420 | 1 | 1 | 2 | 0 |
| Case 6  | 19 | 52,491,250 | 54,080,796 | 1 | 0 | 1 | 0 |
| Case 6  | 19 | 54,080,999 | 56,910,989 | 1 | 1 | 2 | 0 |
| Case 6  | 19 | 56,914,994 | 57,089,556 | 1 | 0 | 1 | 0 |
| Case 6  | 19 | 57,089,562 | 57,748,385 | 1 | 1 | 2 | 0 |
| Case 6  | 19 | 57,755,055 | 58,491,140 | 1 | 0 | 1 | 0 |
| Case 6  | 19 | 58,491,149 | 59,097,160 | 1 | 1 | 2 | 0 |
| Case 6  | 20 | 63,244     | 26,293,985 | 1 | 1 | 2 | 0 |
| Case 6  | 20 | 29,425,357 | 58,384,451 | 1 | 1 | 2 | 0 |
| Case 6  | 20 | 58,385,073 | 58,560,080 | 1 | 0 | 1 | 0 |
| Case 6  | 20 | 58,560,086 | 62,948,788 | 1 | 1 | 2 | 0 |
| Case 6  | 21 | 10,827,533 | 10,971,337 | 1 | 1 | 2 | 0 |
| Case 6  | 21 | 14,368,320 | 48,100,155 | 1 | 1 | 2 | 0 |
| Case 6  | 22 | 16,114,244 | 51,195,728 | 1 | 1 | 2 | 0 |
| Case 14 | 1  | 82,154     | 838,555    | 1 | 0 | 1 | 0 |
| Case 14 | 1  | 846,808    | 1,403,821  | 2 | 0 | 2 | 1 |
| Case 14 | 1  | 1,404,809  | 1,412,659  | 1 | 0 | 1 | 0 |
| Case 14 | 1  | 1,415,012  | 1,451,415  | 0 | 0 | 0 | 0 |
| Case 14 | 1  | 1,458,567  | 1,688,694  | 2 | 0 | 2 | 1 |
| Case 14 | 1  | 1,690,544  | 4,202,818  | 1 | 0 | 1 | 0 |
| Case 14 | 1  | 4,206,210  | 4,240,178  | 2 | 0 | 2 | 1 |
| Case 14 | 1  | 4,250,933  | 5,330,415  | 1 | 0 | 1 | 0 |
| Case 14 | 1  | 5,333,340  | 5,401,364  | 2 | 0 | 2 | 1 |
| Case 14 | 1  | 5,403,031  | 6,038,352  | 1 | 0 | 1 | 0 |
| Case 14 | 1  | 6,038,433  | 6,129,864  | 2 | 0 | 2 | 1 |
| Case 14 | 1  | 6,141,325  | 7,549,488  | 1 | 0 | 1 | 0 |
| Case 14 | 1  | 7,550,126  | 7,698,163  | 2 | 0 | 2 | 1 |
| Case 14 | 1  | 7,700,514  | 8,834,706  | 1 | 0 | 1 | 0 |
| Case 14 | 1  | 8,839,300  | 11,002,488 | 2 | 0 | 2 | 1 |
| Case 14 | 1  | 11,004,245 | 11,008,864 | 1 | 0 | 1 | 0 |
| Case 14 | 1  | 11,008,870 | 16,053,633 | 2 | 0 | 2 | 1 |

|         |   |            |            |   |   |   |   |
|---------|---|------------|------------|---|---|---|---|
| Case 14 | 1 | 16,053,682 | 16,093,946 | 1 | 0 | 1 | 0 |
| Case 14 | 1 | 16,095,093 | 28,298,951 | 2 | 0 | 2 | 1 |
| Case 14 | 1 | 28,299,346 | 28,785,665 | 1 | 0 | 1 | 0 |
| Case 14 | 1 | 28,792,199 | 30,322,046 | 1 | 1 | 2 | 0 |
| Case 14 | 1 | 30,322,367 | 30,362,080 | 1 | 0 | 1 | 0 |
| Case 14 | 1 | 30,364,629 | 32,875,280 | 2 | 0 | 2 | 1 |
| Case 14 | 1 | 32,879,586 | 33,100,815 | 1 | 0 | 1 | 0 |
| Case 14 | 1 | 33,116,103 | 35,403,677 | 2 | 0 | 2 | 1 |
| Case 14 | 1 | 35,428,428 | 35,847,032 | 1 | 0 | 1 | 0 |
| Case 14 | 1 | 35,847,342 | 39,877,514 | 2 | 0 | 2 | 1 |
| Case 14 | 1 | 39,877,829 | 39,956,246 | 1 | 0 | 1 | 0 |
| Case 14 | 1 | 39,963,873 | 47,746,675 | 2 | 0 | 2 | 1 |
| Case 14 | 1 | 47,747,445 | 47,820,192 | 1 | 0 | 1 | 0 |
| Case 14 | 1 | 47,834,152 | 49,336,456 | 1 | 1 | 2 | 0 |
| Case 14 | 1 | 49,341,731 | 50,577,654 | 1 | 0 | 1 | 0 |
| Case 14 | 1 | 50,580,823 | 52,631,292 | 2 | 0 | 2 | 1 |
| Case 14 | 1 | 52,636,517 | 52,798,576 | 1 | 0 | 1 | 0 |
| Case 14 | 1 | 52,803,503 | 53,180,716 | 2 | 0 | 2 | 1 |
| Case 14 | 1 | 53,185,631 | 53,489,132 | 1 | 0 | 1 | 0 |
| Case 14 | 1 | 53,489,668 | 56,326,293 | 2 | 0 | 2 | 1 |
| Case 14 | 1 | 56,328,238 | 56,394,673 | 1 | 0 | 1 | 0 |
| Case 14 | 1 | 56,398,037 | 57,103,219 | 2 | 0 | 2 | 1 |
| Case 14 | 1 | 57,103,362 | 57,209,853 | 1 | 0 | 1 | 0 |
| Case 14 | 1 | 57,209,907 | 62,101,673 | 2 | 0 | 2 | 1 |
| Case 14 | 1 | 62,102,307 | 62,673,126 | 1 | 0 | 1 | 0 |
| Case 14 | 1 | 62,673,225 | 62,743,398 | 2 | 0 | 2 | 1 |
| Case 14 | 1 | 62,745,206 | 63,069,736 | 1 | 0 | 1 | 0 |
| Case 14 | 1 | 63,072,265 | 63,798,761 | 2 | 0 | 2 | 1 |
| Case 14 | 1 | 63,799,525 | 64,002,856 | 1 | 0 | 1 | 0 |
| Case 14 | 1 | 64,011,657 | 66,170,362 | 2 | 0 | 2 | 1 |
| Case 14 | 1 | 66,171,001 | 66,736,001 | 1 | 0 | 1 | 0 |
| Case 14 | 1 | 66,736,142 | 67,539,356 | 1 | 1 | 2 | 0 |
| Case 14 | 1 | 67,543,884 | 67,790,598 | 1 | 0 | 1 | 0 |
| Case 14 | 1 | 67,791,736 | 68,792,113 | 1 | 1 | 2 | 0 |
| Case 14 | 1 | 68,797,702 | 68,865,445 | 1 | 0 | 1 | 0 |
| Case 14 | 1 | 68,870,956 | 69,460,182 | 2 | 0 | 2 | 1 |
| Case 14 | 1 | 69,465,401 | 70,877,779 | 1 | 0 | 1 | 0 |
| Case 14 | 1 | 70,877,964 | 71,379,180 | 2 | 0 | 2 | 1 |
| Case 14 | 1 | 71,380,051 | 74,716,413 | 1 | 0 | 1 | 0 |
| Case 14 | 1 | 74,716,443 | 75,086,496 | 2 | 0 | 2 | 1 |
| Case 14 | 1 | 75,086,510 | 76,540,210 | 1 | 0 | 1 | 0 |
| Case 14 | 1 | 76,549,233 | 77,168,568 | 2 | 0 | 2 | 1 |
| Case 14 | 1 | 77,170,017 | 77,695,541 | 1 | 0 | 1 | 0 |
| Case 14 | 1 | 77,695,854 | 78,178,961 | 2 | 0 | 2 | 1 |
| Case 14 | 1 | 78,180,445 | 78,510,544 | 1 | 0 | 1 | 0 |
| Case 14 | 1 | 78,511,960 | 79,382,009 | 2 | 0 | 2 | 1 |
| Case 14 | 1 | 79,382,535 | 82,456,341 | 1 | 0 | 1 | 0 |
| Case 14 | 1 | 82,456,381 | 82,852,017 | 2 | 0 | 2 | 1 |
| Case 14 | 1 | 82,860,892 | 83,340,310 | 1 | 0 | 1 | 0 |
| Case 14 | 1 | 83,346,145 | 85,003,568 | 2 | 0 | 2 | 1 |
| Case 14 | 1 | 85,007,613 | 85,091,557 | 1 | 0 | 1 | 0 |
| Case 14 | 1 | 85,092,463 | 88,791,432 | 2 | 0 | 2 | 1 |
| Case 14 | 1 | 88,802,012 | 89,388,944 | 1 | 0 | 1 | 0 |
| Case 14 | 1 | 89,399,431 | 90,400,944 | 2 | 0 | 2 | 1 |
| Case 14 | 1 | 90,401,062 | 91,018,205 | 1 | 1 | 2 | 0 |
| Case 14 | 1 | 91,023,890 | 91,023,890 | 2 | 0 | 2 | 1 |
| Case 14 | 1 | 91,028,707 | 91,173,988 | 1 | 0 | 1 | 0 |
| Case 14 | 1 | 91,175,419 | 91,321,687 | 2 | 0 | 2 | 1 |
| Case 14 | 1 | 91,325,323 | 91,919,058 | 1 | 0 | 1 | 0 |
| Case 14 | 1 | 91,919,533 | 92,274,817 | 2 | 0 | 2 | 1 |
| Case 14 | 1 | 92,285,875 | 93,518,578 | 1 | 0 | 1 | 0 |

|         |   |             |             |   |   |   |   |
|---------|---|-------------|-------------|---|---|---|---|
| Case 14 | 1 | 93,523,083  | 96,528,940  | 2 | 0 | 2 | 1 |
| Case 14 | 1 | 96,537,564  | 97,385,644  | 1 | 0 | 1 | 0 |
| Case 14 | 1 | 97,397,211  | 97,609,326  | 2 | 0 | 2 | 1 |
| Case 14 | 1 | 97,610,026  | 99,956,800  | 1 | 0 | 1 | 0 |
| Case 14 | 1 | 99,957,207  | 100,195,206 | 1 | 1 | 2 | 0 |
| Case 14 | 1 | 100,195,231 | 100,661,842 | 1 | 0 | 1 | 0 |
| Case 14 | 1 | 100,672,060 | 102,326,159 | 2 | 0 | 2 | 1 |
| Case 14 | 1 | 102,341,819 | 107,547,919 | 1 | 0 | 1 | 0 |
| Case 14 | 1 | 107,548,745 | 108,116,715 | 2 | 0 | 2 | 1 |
| Case 14 | 1 | 108,124,480 | 108,414,230 | 1 | 0 | 1 | 0 |
| Case 14 | 1 | 108,415,314 | 109,404,282 | 2 | 0 | 2 | 1 |
| Case 14 | 1 | 109,407,730 | 109,477,470 | 1 | 0 | 1 | 0 |
| Case 14 | 1 | 109,479,829 | 110,882,499 | 2 | 0 | 2 | 1 |
| Case 14 | 1 | 110,882,536 | 110,921,952 | 1 | 0 | 1 | 0 |
| Case 14 | 1 | 110,922,140 | 111,060,752 | 1 | 1 | 2 | 0 |
| Case 14 | 1 | 111,060,922 | 111,061,062 | 1 | 0 | 1 | 0 |
| Case 14 | 1 | 111,061,066 | 113,290,694 | 2 | 0 | 2 | 1 |
| Case 14 | 1 | 113,292,658 | 113,637,055 | 1 | 0 | 1 | 0 |
| Case 14 | 1 | 113,637,071 | 114,938,175 | 2 | 0 | 2 | 1 |
| Case 14 | 1 | 114,940,386 | 115,215,833 | 1 | 0 | 1 | 0 |
| Case 14 | 1 | 115,216,359 | 115,280,462 | 2 | 0 | 2 | 1 |
| Case 14 | 1 | 115,280,587 | 115,490,918 | 1 | 0 | 1 | 0 |
| Case 14 | 1 | 115,492,398 | 118,784,987 | 2 | 0 | 2 | 1 |
| Case 14 | 1 | 118,787,119 | 119,372,737 | 1 | 0 | 1 | 0 |
| Case 14 | 1 | 119,373,309 | 121,346,616 | 2 | 0 | 2 | 1 |
| Case 14 | 1 | 142,649,718 | 150,804,813 | 2 | 0 | 2 | 1 |
| Case 14 | 1 | 150,807,249 | 150,857,664 | 1 | 0 | 1 | 0 |
| Case 14 | 1 | 150,860,471 | 154,438,880 | 2 | 0 | 2 | 1 |
| Case 14 | 1 | 154,450,730 | 179,695,998 | 2 | 1 | 3 | 0 |
| Case 14 | 1 | 179,700,133 | 179,794,602 | 1 | 1 | 2 | 0 |
| Case 14 | 1 | 179,795,505 | 205,921,859 | 2 | 1 | 3 | 0 |
| Case 14 | 1 | 206,180,987 | 206,257,802 | 2 | 0 | 2 | 1 |
| Case 14 | 1 | 206,266,889 | 233,154,981 | 2 | 1 | 3 | 0 |
| Case 14 | 1 | 233,157,853 | 233,256,280 | 2 | 0 | 2 | 1 |
| Case 14 | 1 | 233,262,943 | 235,715,523 | 2 | 1 | 3 | 0 |
| Case 14 | 1 | 235,717,340 | 240,396,790 | 1 | 1 | 2 | 0 |
| Case 14 | 1 | 240,396,842 | 240,660,818 | 1 | 0 | 1 | 0 |
| Case 14 | 1 | 240,666,156 | 242,140,841 | 1 | 1 | 2 | 0 |
| Case 14 | 1 | 242,148,832 | 242,332,289 | 1 | 0 | 1 | 0 |
| Case 14 | 1 | 242,342,504 | 243,609,927 | 1 | 1 | 2 | 0 |
| Case 14 | 1 | 243,613,748 | 244,160,904 | 1 | 0 | 1 | 0 |
| Case 14 | 1 | 244,161,728 | 245,811,646 | 1 | 1 | 2 | 0 |
| Case 14 | 1 | 245,813,813 | 245,932,939 | 2 | 1 | 3 | 0 |
| Case 14 | 1 | 245,936,738 | 247,142,532 | 1 | 0 | 1 | 0 |
| Case 14 | 1 | 247,145,690 | 247,207,285 | 0 | 0 | 0 | 0 |
| Case 14 | 1 | 247,226,344 | 247,226,344 | 2 | 0 | 2 | 1 |
| Case 14 | 1 | 247,236,374 | 247,715,998 | 1 | 0 | 1 | 0 |
| Case 14 | 1 | 247,719,377 | 248,059,856 | 2 | 1 | 3 | 0 |
| Case 14 | 1 | 248,060,541 | 249,218,992 | 1 | 1 | 2 | 0 |
| Case 14 | 2 | 18,674      | 92,081,640  | 1 | 1 | 2 | 0 |
| Case 14 | 2 | 95,429,424  | 241,722,018 | 1 | 1 | 2 | 0 |
| Case 14 | 2 | 241,722,445 | 241,957,677 | 1 | 0 | 1 | 0 |
| Case 14 | 2 | 241,961,346 | 243,048,760 | 1 | 1 | 2 | 0 |
| Case 14 | 3 | 61,495      | 678,347     | 2 | 0 | 2 | 1 |
| Case 14 | 3 | 684,744     | 1,082,282   | 1 | 0 | 1 | 0 |
| Case 14 | 3 | 1,086,912   | 1,175,950   | 2 | 0 | 2 | 1 |
| Case 14 | 3 | 1,183,679   | 1,296,579   | 1 | 0 | 1 | 0 |
| Case 14 | 3 | 1,297,263   | 1,419,010   | 1 | 1 | 2 | 0 |
| Case 14 | 3 | 1,420,284   | 1,467,675   | 1 | 0 | 1 | 0 |
| Case 14 | 3 | 1,470,616   | 5,925,079   | 2 | 0 | 2 | 1 |
| Case 14 | 3 | 5,926,673   | 6,293,480   | 1 | 0 | 1 | 0 |



|         |   |             |             |   |   |   |   |
|---------|---|-------------|-------------|---|---|---|---|
| Case 14 | 3 | 6,293,907   | 27,472,936  | 2 | 0 | 2 | 1 |
| Case 14 | 3 | 27,473,124  | 27,635,608  | 1 | 0 | 1 | 0 |
| Case 14 | 3 | 27,638,500  | 27,827,733  | 2 | 0 | 2 | 1 |
| Case 14 | 3 | 27,833,251  | 27,991,802  | 1 | 0 | 1 | 0 |
| Case 14 | 3 | 28,005,890  | 35,982,130  | 2 | 0 | 2 | 1 |
| Case 14 | 3 | 35,987,406  | 36,189,216  | 1 | 0 | 1 | 0 |
| Case 14 | 3 | 36,190,651  | 44,763,273  | 2 | 0 | 2 | 1 |
| Case 14 | 3 | 44,763,766  | 44,854,614  | 1 | 0 | 1 | 0 |
| Case 14 | 3 | 44,856,496  | 60,263,721  | 2 | 0 | 2 | 1 |
| Case 14 | 3 | 60,267,024  | 61,262,149  | 1 | 0 | 1 | 0 |
| Case 14 | 3 | 61,267,416  | 76,749,882  | 2 | 0 | 2 | 1 |
| Case 14 | 3 | 76,753,766  | 78,615,037  | 1 | 0 | 1 | 0 |
| Case 14 | 3 | 78,617,646  | 79,562,067  | 2 | 0 | 2 | 1 |
| Case 14 | 3 | 79,567,629  | 80,171,401  | 1 | 0 | 1 | 0 |
| Case 14 | 3 | 80,173,567  | 82,787,794  | 2 | 0 | 2 | 1 |
| Case 14 | 3 | 82,788,885  | 85,533,359  | 1 | 0 | 1 | 0 |
| Case 14 | 3 | 85,551,820  | 89,450,464  | 2 | 0 | 2 | 1 |
| Case 14 | 3 | 89,456,470  | 90,442,925  | 1 | 0 | 1 | 0 |
| Case 14 | 3 | 93,537,290  | 93,772,081  | 1 | 0 | 1 | 0 |
| Case 14 | 3 | 93,775,411  | 94,596,072  | 2 | 0 | 2 | 1 |
| Case 14 | 3 | 94,601,094  | 95,105,974  | 1 | 0 | 1 | 0 |
| Case 14 | 3 | 95,108,147  | 95,633,649  | 2 | 0 | 2 | 1 |
| Case 14 | 3 | 95,638,744  | 97,045,121  | 1 | 0 | 1 | 0 |
| Case 14 | 3 | 97,059,115  | 102,506,798 | 2 | 0 | 2 | 1 |
| Case 14 | 3 | 102,521,272 | 104,106,742 | 1 | 0 | 1 | 0 |
| Case 14 | 3 | 104,106,807 | 137,882,949 | 2 | 0 | 2 | 1 |
| Case 14 | 3 | 137,890,531 | 138,052,754 | 1 | 0 | 1 | 0 |
| Case 14 | 3 | 138,053,187 | 144,291,254 | 2 | 0 | 2 | 1 |
| Case 14 | 3 | 144,298,314 | 144,356,717 | 1 | 0 | 1 | 0 |
| Case 14 | 3 | 144,358,592 | 147,340,091 | 2 | 0 | 2 | 1 |
| Case 14 | 3 | 147,341,672 | 147,484,611 | 1 | 0 | 1 | 0 |
| Case 14 | 3 | 147,492,616 | 149,993,405 | 2 | 0 | 2 | 1 |
| Case 14 | 3 | 149,994,882 | 150,034,556 | 3 | 0 | 3 | 1 |
| Case 14 | 3 | 150,035,821 | 152,711,310 | 2 | 0 | 2 | 1 |
| Case 14 | 3 | 152,715,720 | 153,280,557 | 1 | 0 | 1 | 0 |
| Case 14 | 3 | 153,284,777 | 155,457,386 | 2 | 0 | 2 | 1 |
| Case 14 | 3 | 155,465,491 | 155,723,064 | 1 | 0 | 1 | 0 |
| Case 14 | 3 | 155,725,030 | 156,029,020 | 2 | 0 | 2 | 1 |
| Case 14 | 3 | 156,032,178 | 156,157,738 | 1 | 0 | 1 | 0 |
| Case 14 | 3 | 156,158,932 | 162,012,615 | 2 | 0 | 2 | 1 |
| Case 14 | 3 | 162,049,078 | 162,227,870 | 1 | 0 | 1 | 0 |
| Case 14 | 3 | 162,237,495 | 163,033,205 | 2 | 0 | 2 | 1 |
| Case 14 | 3 | 163,048,842 | 164,515,528 | 1 | 0 | 1 | 0 |
| Case 14 | 3 | 164,524,259 | 165,711,873 | 2 | 0 | 2 | 1 |
| Case 14 | 3 | 165,751,527 | 166,745,700 | 1 | 0 | 1 | 0 |
| Case 14 | 3 | 166,745,838 | 183,690,243 | 2 | 0 | 2 | 1 |
| Case 14 | 3 | 183,690,265 | 183,722,591 | 1 | 0 | 1 | 0 |
| Case 14 | 3 | 183,722,779 | 191,348,064 | 2 | 0 | 2 | 1 |
| Case 14 | 3 | 191,348,677 | 191,432,503 | 1 | 0 | 1 | 0 |
| Case 14 | 3 | 191,433,799 | 194,448,231 | 2 | 0 | 2 | 1 |
| Case 14 | 3 | 194,452,392 | 194,532,442 | 1 | 0 | 1 | 0 |
| Case 14 | 3 | 194,533,470 | 195,791,240 | 2 | 0 | 2 | 1 |
| Case 14 | 3 | 195,791,279 | 195,809,139 | 1 | 0 | 1 | 0 |
| Case 14 | 3 | 195,815,594 | 197,838,262 | 2 | 0 | 2 | 1 |
| Case 14 | 4 | 71,566      | 504,012     | 1 | 0 | 1 | 0 |
| Case 14 | 4 | 509,850     | 2,132,961   | 2 | 0 | 2 | 1 |
| Case 14 | 4 | 2,137,283   | 2,252,881   | 1 | 0 | 1 | 0 |
| Case 14 | 4 | 2,256,716   | 8,645,076   | 2 | 0 | 2 | 1 |
| Case 14 | 4 | 8,647,103   | 9,722,133   | 1 | 0 | 1 | 0 |
| Case 14 | 4 | 9,724,519   | 10,388,610  | 2 | 0 | 2 | 1 |
| Case 14 | 4 | 10,398,427  | 10,557,861  | 1 | 0 | 1 | 0 |

|         |   |            |            |   |   |   |   |
|---------|---|------------|------------|---|---|---|---|
| Case 14 | 4 | 10,559,041 | 12,578,444 | 2 | 0 | 2 | 1 |
| Case 14 | 4 | 12,579,381 | 12,888,995 | 1 | 0 | 1 | 0 |
| Case 14 | 4 | 12,889,196 | 13,359,047 | 1 | 1 | 2 | 0 |
| Case 14 | 4 | 13,360,630 | 13,570,152 | 1 | 0 | 1 | 0 |
| Case 14 | 4 | 13,571,720 | 14,349,700 | 2 | 0 | 2 | 1 |
| Case 14 | 4 | 14,350,981 | 14,533,433 | 1 | 0 | 1 | 0 |
| Case 14 | 4 | 14,539,140 | 14,955,398 | 2 | 0 | 2 | 1 |
| Case 14 | 4 | 14,962,496 | 15,342,608 | 1 | 0 | 1 | 0 |
| Case 14 | 4 | 15,353,889 | 18,752,731 | 2 | 0 | 2 | 1 |
| Case 14 | 4 | 18,752,760 | 19,517,296 | 1 | 0 | 1 | 0 |
| Case 14 | 4 | 19,525,991 | 19,684,918 | 0 | 0 | 0 | 0 |
| Case 14 | 4 | 19,696,428 | 19,740,879 | 2 | 0 | 2 | 1 |
| Case 14 | 4 | 19,751,585 | 20,749,299 | 1 | 0 | 1 | 0 |
| Case 14 | 4 | 20,751,278 | 22,090,754 | 2 | 0 | 2 | 1 |
| Case 14 | 4 | 22,091,384 | 22,293,243 | 1 | 0 | 1 | 0 |
| Case 14 | 4 | 22,297,899 | 22,962,472 | 2 | 0 | 2 | 1 |
| Case 14 | 4 | 22,979,347 | 23,730,887 | 1 | 0 | 1 | 0 |
| Case 14 | 4 | 23,732,218 | 25,133,669 | 2 | 0 | 2 | 1 |
| Case 14 | 4 | 25,135,095 | 25,382,783 | 1 | 0 | 1 | 0 |
| Case 14 | 4 | 25,386,559 | 26,275,139 | 2 | 0 | 2 | 1 |
| Case 14 | 4 | 26,275,336 | 26,756,541 | 1 | 0 | 1 | 0 |
| Case 14 | 4 | 26,756,855 | 27,324,215 | 2 | 0 | 2 | 1 |
| Case 14 | 4 | 27,326,253 | 30,476,154 | 1 | 0 | 1 | 0 |
| Case 14 | 4 | 30,478,873 | 30,726,226 | 2 | 0 | 2 | 1 |
| Case 14 | 4 | 30,727,233 | 35,873,240 | 1 | 0 | 1 | 0 |
| Case 14 | 4 | 35,873,980 | 36,350,425 | 2 | 0 | 2 | 1 |
| Case 14 | 4 | 36,350,641 | 37,034,349 | 1 | 0 | 1 | 0 |
| Case 14 | 4 | 37,036,317 | 37,848,578 | 2 | 0 | 2 | 1 |
| Case 14 | 4 | 37,848,697 | 37,884,481 | 1 | 0 | 1 | 0 |
| Case 14 | 4 | 37,885,195 | 39,538,357 | 2 | 0 | 2 | 1 |
| Case 14 | 4 | 39,548,112 | 40,158,464 | 1 | 0 | 1 | 0 |
| Case 14 | 4 | 40,162,971 | 40,590,908 | 2 | 0 | 2 | 1 |
| Case 14 | 4 | 40,594,008 | 40,800,878 | 1 | 0 | 1 | 0 |
| Case 14 | 4 | 40,810,351 | 42,965,002 | 2 | 0 | 2 | 1 |
| Case 14 | 4 | 42,969,550 | 45,720,024 | 1 | 0 | 1 | 0 |
| Case 14 | 4 | 45,725,524 | 46,474,853 | 2 | 0 | 2 | 1 |
| Case 14 | 4 | 46,498,640 | 47,544,947 | 1 | 0 | 1 | 0 |
| Case 14 | 4 | 47,548,254 | 49,620,898 | 2 | 0 | 2 | 1 |
| Case 14 | 4 | 52,697,856 | 56,664,054 | 2 | 0 | 2 | 1 |
| Case 14 | 4 | 56,667,225 | 57,156,379 | 1 | 0 | 1 | 0 |
| Case 14 | 4 | 57,162,619 | 57,696,918 | 2 | 0 | 2 | 1 |
| Case 14 | 4 | 57,700,528 | 57,905,453 | 1 | 0 | 1 | 0 |
| Case 14 | 4 | 57,905,807 | 58,604,281 | 2 | 0 | 2 | 1 |
| Case 14 | 4 | 58,614,509 | 69,259,223 | 1 | 0 | 1 | 0 |
| Case 14 | 4 | 69,280,975 | 69,923,096 | 2 | 0 | 2 | 1 |
| Case 14 | 4 | 69,927,974 | 70,443,083 | 1 | 0 | 1 | 0 |
| Case 14 | 4 | 70,449,652 | 70,496,262 | 2 | 0 | 2 | 1 |
| Case 14 | 4 | 70,497,601 | 70,719,238 | 1 | 0 | 1 | 0 |
| Case 14 | 4 | 70,719,533 | 70,823,167 | 2 | 0 | 2 | 1 |
| Case 14 | 4 | 70,823,168 | 71,117,202 | 1 | 0 | 1 | 0 |
| Case 14 | 4 | 71,121,681 | 71,527,881 | 2 | 0 | 2 | 1 |
| Case 14 | 4 | 71,532,168 | 72,873,814 | 1 | 0 | 1 | 0 |
| Case 14 | 4 | 72,875,597 | 76,051,855 | 2 | 0 | 2 | 1 |
| Case 14 | 4 | 76,072,424 | 76,756,059 | 1 | 0 | 1 | 0 |
| Case 14 | 4 | 76,761,164 | 80,558,107 | 2 | 0 | 2 | 1 |
| Case 14 | 4 | 80,558,341 | 80,984,670 | 1 | 0 | 1 | 0 |
| Case 14 | 4 | 80,988,478 | 81,124,319 | 2 | 0 | 2 | 1 |
| Case 14 | 4 | 81,126,083 | 81,160,847 | 1 | 0 | 1 | 0 |
| Case 14 | 4 | 81,164,723 | 81,504,321 | 1 | 1 | 2 | 0 |
| Case 14 | 4 | 81,504,336 | 81,553,197 | 2 | 0 | 2 | 1 |
| Case 14 | 4 | 81,554,785 | 81,944,280 | 1 | 0 | 1 | 0 |

|         |   |             |             |   |   |   |   |
|---------|---|-------------|-------------|---|---|---|---|
| Case 14 | 4 | 81,945,383  | 83,770,027  | 2 | 0 | 2 | 1 |
| Case 14 | 4 | 83,778,839  | 83,955,450  | 1 | 0 | 1 | 0 |
| Case 14 | 4 | 83,956,388  | 84,288,014  | 2 | 0 | 2 | 1 |
| Case 14 | 4 | 84,288,613  | 84,511,351  | 1 | 0 | 1 | 0 |
| Case 14 | 4 | 84,515,775  | 85,434,987  | 2 | 0 | 2 | 1 |
| Case 14 | 4 | 85,440,241  | 86,294,733  | 1 | 0 | 1 | 0 |
| Case 14 | 4 | 86,297,661  | 87,738,967  | 2 | 0 | 2 | 1 |
| Case 14 | 4 | 87,741,699  | 87,898,302  | 1 | 0 | 1 | 0 |
| Case 14 | 4 | 87,919,706  | 88,104,382  | 2 | 0 | 2 | 1 |
| Case 14 | 4 | 88,106,634  | 88,379,063  | 1 | 0 | 1 | 0 |
| Case 14 | 4 | 88,379,064  | 89,061,083  | 1 | 1 | 2 | 0 |
| Case 14 | 4 | 89,061,114  | 89,338,691  | 1 | 0 | 1 | 0 |
| Case 14 | 4 | 89,338,731  | 91,227,681  | 2 | 0 | 2 | 1 |
| Case 14 | 4 | 91,229,455  | 94,242,858  | 1 | 0 | 1 | 0 |
| Case 14 | 4 | 94,251,270  | 94,926,597  | 2 | 0 | 2 | 1 |
| Case 14 | 4 | 94,927,323  | 95,199,785  | 1 | 0 | 1 | 0 |
| Case 14 | 4 | 95,199,855  | 95,313,228  | 2 | 0 | 2 | 1 |
| Case 14 | 4 | 95,321,259  | 95,843,673  | 1 | 0 | 1 | 0 |
| Case 14 | 4 | 95,845,911  | 96,127,799  | 2 | 0 | 2 | 1 |
| Case 14 | 4 | 96,127,869  | 96,460,537  | 1 | 0 | 1 | 0 |
| Case 14 | 4 | 96,461,841  | 96,764,785  | 2 | 0 | 2 | 1 |
| Case 14 | 4 | 96,765,029  | 99,304,544  | 1 | 0 | 1 | 0 |
| Case 14 | 4 | 99,309,404  | 100,503,159 | 1 | 1 | 2 | 0 |
| Case 14 | 4 | 100,503,173 | 101,508,995 | 1 | 0 | 1 | 0 |
| Case 14 | 4 | 101,510,054 | 104,270,805 | 2 | 0 | 2 | 1 |
| Case 14 | 4 | 104,271,269 | 105,476,932 | 1 | 0 | 1 | 0 |
| Case 14 | 4 | 105,491,264 | 106,996,077 | 2 | 0 | 2 | 1 |
| Case 14 | 4 | 107,016,742 | 108,041,804 | 1 | 0 | 1 | 0 |
| Case 14 | 4 | 108,043,696 | 108,120,955 | 2 | 0 | 2 | 1 |
| Case 14 | 4 | 108,127,486 | 108,824,530 | 1 | 0 | 1 | 0 |
| Case 14 | 4 | 108,825,559 | 109,290,374 | 2 | 0 | 2 | 1 |
| Case 14 | 4 | 109,292,368 | 109,298,141 | 1 | 1 | 2 | 0 |
| Case 14 | 4 | 109,298,935 | 110,132,858 | 1 | 0 | 1 | 0 |
| Case 14 | 4 | 110,136,612 | 110,388,034 | 2 | 0 | 2 | 1 |
| Case 14 | 4 | 110,394,162 | 110,605,744 | 1 | 0 | 1 | 0 |
| Case 14 | 4 | 110,605,749 | 110,667,387 | 2 | 0 | 2 | 1 |
| Case 14 | 4 | 110,667,464 | 110,754,499 | 1 | 0 | 1 | 0 |
| Case 14 | 4 | 110,756,579 | 112,061,855 | 2 | 0 | 2 | 1 |
| Case 14 | 4 | 112,077,613 | 112,587,024 | 1 | 0 | 1 | 0 |
| Case 14 | 4 | 112,588,951 | 113,380,119 | 1 | 1 | 2 | 0 |
| Case 14 | 4 | 113,382,048 | 113,867,271 | 1 | 0 | 1 | 0 |
| Case 14 | 4 | 113,868,607 | 115,998,124 | 2 | 0 | 2 | 1 |
| Case 14 | 4 | 115,998,150 | 118,717,631 | 1 | 0 | 1 | 0 |
| Case 14 | 4 | 118,722,033 | 119,770,915 | 2 | 0 | 2 | 1 |
| Case 14 | 4 | 119,772,316 | 119,795,642 | 1 | 0 | 1 | 0 |
| Case 14 | 4 | 119,800,081 | 120,665,038 | 2 | 0 | 2 | 1 |
| Case 14 | 4 | 120,670,520 | 122,222,233 | 1 | 0 | 1 | 0 |
| Case 14 | 4 | 122,226,998 | 122,350,537 | 2 | 0 | 2 | 1 |
| Case 14 | 4 | 122,353,707 | 122,568,322 | 1 | 0 | 1 | 0 |
| Case 14 | 4 | 122,569,803 | 124,847,477 | 2 | 0 | 2 | 1 |
| Case 14 | 4 | 124,850,901 | 126,318,368 | 1 | 0 | 1 | 0 |
| Case 14 | 4 | 126,319,772 | 126,419,726 | 1 | 1 | 2 | 0 |
| Case 14 | 4 | 126,423,687 | 128,411,344 | 1 | 0 | 1 | 0 |
| Case 14 | 4 | 128,419,398 | 128,715,251 | 2 | 0 | 2 | 1 |
| Case 14 | 4 | 128,715,260 | 129,127,647 | 1 | 0 | 1 | 0 |
| Case 14 | 4 | 129,131,153 | 129,836,255 | 2 | 0 | 2 | 1 |
| Case 14 | 4 | 129,838,879 | 130,317,282 | 1 | 0 | 1 | 0 |
| Case 14 | 4 | 130,318,033 | 130,767,559 | 2 | 0 | 2 | 1 |
| Case 14 | 4 | 130,767,899 | 138,436,116 | 1 | 0 | 1 | 0 |
| Case 14 | 4 | 138,440,012 | 138,900,717 | 2 | 0 | 2 | 1 |
| Case 14 | 4 | 138,902,871 | 139,184,664 | 1 | 0 | 1 | 0 |

|         |   |             |             |   |   |   |   |
|---------|---|-------------|-------------|---|---|---|---|
| Case 14 | 4 | 139,184,781 | 139,975,818 | 2 | 0 | 2 | 1 |
| Case 14 | 4 | 139,980,741 | 140,099,768 | 1 | 0 | 1 | 0 |
| Case 14 | 4 | 140,100,756 | 141,315,152 | 1 | 1 | 2 | 0 |
| Case 14 | 4 | 141,315,174 | 141,465,244 | 1 | 0 | 1 | 0 |
| Case 14 | 4 | 141,468,569 | 142,517,416 | 2 | 0 | 2 | 1 |
| Case 14 | 4 | 142,533,402 | 142,834,152 | 1 | 0 | 1 | 0 |
| Case 14 | 4 | 142,836,161 | 145,123,453 | 2 | 0 | 2 | 1 |
| Case 14 | 4 | 145,135,525 | 146,639,208 | 1 | 0 | 1 | 0 |
| Case 14 | 4 | 146,639,774 | 147,112,495 | 2 | 0 | 2 | 1 |
| Case 14 | 4 | 147,118,845 | 147,830,322 | 1 | 0 | 1 | 0 |
| Case 14 | 4 | 147,830,349 | 148,488,545 | 2 | 0 | 2 | 1 |
| Case 14 | 4 | 148,499,607 | 148,974,602 | 1 | 0 | 1 | 0 |
| Case 14 | 4 | 148,979,174 | 149,393,131 | 2 | 0 | 2 | 1 |
| Case 14 | 4 | 149,398,778 | 150,459,436 | 1 | 0 | 1 | 0 |
| Case 14 | 4 | 150,473,832 | 152,826,032 | 2 | 0 | 2 | 1 |
| Case 14 | 4 | 152,832,903 | 152,832,903 | 1 | 0 | 1 | 0 |
| Case 14 | 4 | 152,833,119 | 153,245,269 | 0 | 0 | 0 | 0 |
| Case 14 | 4 | 153,252,061 | 155,665,552 | 2 | 0 | 2 | 1 |
| Case 14 | 4 | 155,665,876 | 158,711,676 | 1 | 0 | 1 | 0 |
| Case 14 | 4 | 158,715,149 | 160,261,053 | 2 | 0 | 2 | 1 |
| Case 14 | 4 | 160,264,140 | 161,848,243 | 1 | 0 | 1 | 0 |
| Case 14 | 4 | 161,851,303 | 161,924,832 | 2 | 0 | 2 | 1 |
| Case 14 | 4 | 161,935,342 | 164,245,854 | 1 | 0 | 1 | 0 |
| Case 14 | 4 | 164,246,489 | 164,595,666 | 2 | 0 | 2 | 1 |
| Case 14 | 4 | 164,602,209 | 166,431,563 | 1 | 0 | 1 | 0 |
| Case 14 | 4 | 166,433,829 | 166,588,085 | 2 | 0 | 2 | 1 |
| Case 14 | 4 | 166,588,960 | 169,141,828 | 1 | 0 | 1 | 0 |
| Case 14 | 4 | 169,141,843 | 170,919,666 | 2 | 0 | 2 | 1 |
| Case 14 | 4 | 170,924,737 | 171,152,392 | 1 | 0 | 1 | 0 |
| Case 14 | 4 | 171,163,418 | 171,654,737 | 2 | 0 | 2 | 1 |
| Case 14 | 4 | 171,663,745 | 172,509,887 | 1 | 0 | 1 | 0 |
| Case 14 | 4 | 172,516,685 | 172,864,640 | 0 | 0 | 0 | 0 |
| Case 14 | 4 | 172,868,453 | 172,870,885 | 2 | 1 | 3 | 0 |
| Case 14 | 4 | 172,871,125 | 178,962,336 | 1 | 1 | 2 | 0 |
| Case 14 | 4 | 178,967,175 | 179,511,788 | 1 | 0 | 1 | 0 |
| Case 14 | 4 | 179,514,388 | 181,825,165 | 1 | 1 | 2 | 0 |
| Case 14 | 4 | 181,826,016 | 182,009,132 | 2 | 1 | 3 | 0 |
| Case 14 | 4 | 182,024,045 | 185,197,061 | 1 | 0 | 1 | 0 |
| Case 14 | 4 | 185,203,124 | 186,446,250 | 0 | 0 | 0 | 0 |
| Case 14 | 4 | 186,448,369 | 186,456,560 | 2 | 0 | 2 | 1 |
| Case 14 | 4 | 186,459,026 | 186,997,807 | 3 | 0 | 3 | 1 |
| Case 14 | 4 | 186,997,949 | 188,716,736 | 2 | 0 | 2 | 1 |
| Case 14 | 4 | 188,717,853 | 190,963,766 | 1 | 0 | 1 | 0 |
| Case 14 | 5 | 38,139      | 18,885,615  | 2 | 1 | 3 | 0 |
| Case 14 | 5 | 18,890,253  | 19,247,098  | 0 | 0 | 0 | 0 |
| Case 14 | 5 | 19,266,101  | 45,983,680  | 2 | 1 | 3 | 0 |
| Case 14 | 5 | 45,988,948  | 46,399,093  | 1 | 1 | 2 | 0 |
| Case 14 | 5 | 49,457,282  | 49,586,870  | 1 | 1 | 2 | 0 |
| Case 14 | 5 | 49,597,497  | 58,318,034  | 2 | 1 | 3 | 0 |
| Case 14 | 5 | 58,324,403  | 58,558,595  | 2 | 0 | 2 | 1 |
| Case 14 | 5 | 58,564,232  | 59,398,304  | 2 | 1 | 3 | 0 |
| Case 14 | 5 | 59,420,684  | 60,401,606  | 1 | 0 | 1 | 0 |
| Case 14 | 5 | 60,402,210  | 72,294,458  | 2 | 1 | 3 | 0 |
| Case 14 | 5 | 72,295,577  | 72,502,029  | 3 | 1 | 4 | 0 |
| Case 14 | 5 | 72,521,202  | 76,086,795  | 2 | 1 | 3 | 0 |
| Case 14 | 5 | 76,092,225  | 76,836,055  | 1 | 0 | 1 | 0 |
| Case 14 | 5 | 76,854,563  | 98,994,964  | 2 | 1 | 3 | 0 |
| Case 14 | 5 | 99,001,200  | 99,260,992  | 1 | 0 | 1 | 0 |
| Case 14 | 5 | 99,263,712  | 99,319,166  | 0 | 0 | 0 | 0 |
| Case 14 | 5 | 99,325,303  | 109,570,615 | 2 | 1 | 3 | 0 |
| Case 14 | 5 | 109,589,596 | 110,207,981 | 1 | 0 | 1 | 0 |

|         |   |             |             |   |   |   |   |
|---------|---|-------------|-------------|---|---|---|---|
| Case 14 | 5 | 110,209,582 | 112,089,480 | 2 | 0 | 2 | 1 |
| Case 14 | 5 | 112,090,657 | 112,291,861 | 1 | 0 | 1 | 0 |
| Case 14 | 5 | 112,292,127 | 112,848,767 | 2 | 0 | 2 | 1 |
| Case 14 | 5 | 112,849,608 | 112,929,048 | 1 | 0 | 1 | 0 |
| Case 14 | 5 | 112,929,694 | 116,199,838 | 2 | 0 | 2 | 1 |
| Case 14 | 5 | 116,200,854 | 116,528,042 | 1 | 0 | 1 | 0 |
| Case 14 | 5 | 116,529,909 | 118,176,782 | 2 | 0 | 2 | 1 |
| Case 14 | 5 | 118,179,104 | 118,483,001 | 1 | 0 | 1 | 0 |
| Case 14 | 5 | 118,484,611 | 120,515,118 | 2 | 0 | 2 | 1 |
| Case 14 | 5 | 120,517,296 | 121,422,057 | 1 | 0 | 1 | 0 |
| Case 14 | 5 | 121,426,675 | 130,242,429 | 2 | 0 | 2 | 1 |
| Case 14 | 5 | 130,245,867 | 131,066,709 | 1 | 0 | 1 | 0 |
| Case 14 | 5 | 131,066,725 | 133,482,348 | 2 | 0 | 2 | 1 |
| Case 14 | 5 | 133,486,263 | 133,781,587 | 1 | 0 | 1 | 0 |
| Case 14 | 5 | 133,781,618 | 133,943,185 | 2 | 0 | 2 | 1 |
| Case 14 | 5 | 133,943,937 | 134,270,779 | 1 | 0 | 1 | 0 |
| Case 14 | 5 | 134,272,525 | 137,086,605 | 2 | 0 | 2 | 1 |
| Case 14 | 5 | 137,088,234 | 137,527,948 | 1 | 0 | 1 | 0 |
| Case 14 | 5 | 137,534,453 | 139,930,307 | 2 | 0 | 2 | 1 |
| Case 14 | 5 | 139,930,380 | 139,931,384 | 1 | 0 | 1 | 0 |
| Case 14 | 5 | 139,931,607 | 139,936,823 | 0 | 0 | 0 | 0 |
| Case 14 | 5 | 139,936,825 | 147,443,360 | 2 | 0 | 2 | 1 |
| Case 14 | 5 | 147,449,923 | 147,506,583 | 1 | 0 | 1 | 0 |
| Case 14 | 5 | 147,506,593 | 151,665,028 | 2 | 0 | 2 | 1 |
| Case 14 | 5 | 151,673,229 | 151,778,214 | 1 | 0 | 1 | 0 |
| Case 14 | 5 | 151,784,058 | 162,847,832 | 2 | 0 | 2 | 1 |
| Case 14 | 5 | 162,866,179 | 163,083,956 | 1 | 0 | 1 | 0 |
| Case 14 | 5 | 163,084,821 | 164,071,553 | 2 | 0 | 2 | 1 |
| Case 14 | 5 | 164,088,373 | 164,307,353 | 1 | 0 | 1 | 0 |
| Case 14 | 5 | 164,308,225 | 164,917,641 | 2 | 0 | 2 | 1 |
| Case 14 | 5 | 164,919,132 | 165,009,396 | 1 | 0 | 1 | 0 |
| Case 14 | 5 | 165,010,625 | 165,309,208 | 2 | 0 | 2 | 1 |
| Case 14 | 5 | 165,311,430 | 165,473,194 | 1 | 0 | 1 | 0 |
| Case 14 | 5 | 165,475,683 | 165,884,072 | 2 | 0 | 2 | 1 |
| Case 14 | 5 | 165,885,226 | 166,011,085 | 1 | 0 | 1 | 0 |
| Case 14 | 5 | 166,017,077 | 166,634,403 | 2 | 0 | 2 | 1 |
| Case 14 | 5 | 166,649,746 | 169,491,247 | 3 | 0 | 3 | 1 |
| Case 14 | 5 | 169,494,844 | 170,059,227 | 2 | 0 | 2 | 1 |
| Case 14 | 5 | 170,066,527 | 177,949,429 | 3 | 0 | 3 | 1 |
| Case 14 | 5 | 177,954,516 | 178,567,054 | 2 | 0 | 2 | 1 |
| Case 14 | 5 | 178,570,914 | 180,693,127 | 3 | 0 | 3 | 1 |
| Case 14 | 6 | 108,666     | 27,808,739  | 2 | 1 | 3 | 0 |
| Case 14 | 6 | 27,809,746  | 27,869,321  | 1 | 1 | 2 | 0 |
| Case 14 | 6 | 27,870,358  | 30,993,958  | 2 | 1 | 3 | 0 |
| Case 14 | 6 | 30,994,163  | 30,994,778  | 0 | 0 | 0 | 0 |
| Case 14 | 6 | 30,995,078  | 58,752,089  | 2 | 1 | 3 | 0 |
| Case 14 | 6 | 61,891,118  | 87,449,564  | 2 | 1 | 3 | 0 |
| Case 14 | 6 | 87,456,331  | 124,269,067 | 1 | 1 | 2 | 0 |
| Case 14 | 6 | 124,270,952 | 124,304,371 | 1 | 0 | 1 | 0 |
| Case 14 | 6 | 124,306,595 | 163,661,513 | 1 | 1 | 2 | 0 |
| Case 14 | 6 | 163,662,002 | 163,777,215 | 1 | 0 | 1 | 0 |
| Case 14 | 6 | 163,779,672 | 170,049,350 | 1 | 1 | 2 | 0 |
| Case 14 | 6 | 170,049,354 | 170,980,171 | 2 | 1 | 3 | 0 |
| Case 14 | 7 | 44,935      | 687,469     | 3 | 1 | 4 | 0 |
| Case 14 | 7 | 704,573     | 1,024,871   | 2 | 1 | 3 | 0 |
| Case 14 | 7 | 1,026,311   | 2,227,344   | 3 | 1 | 4 | 0 |
| Case 14 | 7 | 2,230,225   | 2,499,770   | 2 | 1 | 3 | 0 |
| Case 14 | 7 | 2,505,567   | 3,659,530   | 3 | 1 | 4 | 0 |
| Case 14 | 7 | 3,676,463   | 4,479,253   | 2 | 1 | 3 | 0 |
| Case 14 | 7 | 4,483,857   | 5,224,407   | 3 | 1 | 4 | 0 |
| Case 14 | 7 | 5,232,789   | 6,732,315   | 2 | 1 | 3 | 0 |

|         |   |             |             |   |   |   |   |
|---------|---|-------------|-------------|---|---|---|---|
| Case 14 | 7 | 6,735,534   | 20,030,908  | 3 | 1 | 4 | 0 |
| Case 14 | 7 | 20,032,182  | 20,032,762  | 2 | 1 | 3 | 0 |
| Case 14 | 7 | 20,036,179  | 20,144,829  | 0 | 0 | 0 | 0 |
| Case 14 | 7 | 20,147,715  | 20,149,537  | 2 | 1 | 3 | 0 |
| Case 14 | 7 | 20,152,801  | 23,175,946  | 3 | 1 | 4 | 0 |
| Case 14 | 7 | 23,187,179  | 23,579,399  | 2 | 1 | 3 | 0 |
| Case 14 | 7 | 23,586,645  | 27,121,456  | 3 | 1 | 4 | 0 |
| Case 14 | 7 | 27,130,276  | 27,238,913  | 2 | 1 | 3 | 0 |
| Case 14 | 7 | 27,239,064  | 42,005,073  | 3 | 1 | 4 | 0 |
| Case 14 | 7 | 42,005,522  | 42,187,851  | 2 | 1 | 3 | 0 |
| Case 14 | 7 | 42,188,538  | 43,665,500  | 3 | 1 | 4 | 0 |
| Case 14 | 7 | 43,665,808  | 44,153,780  | 2 | 1 | 3 | 0 |
| Case 14 | 7 | 44,153,825  | 44,556,834  | 3 | 1 | 4 | 0 |
| Case 14 | 7 | 44,556,893  | 45,077,978  | 2 | 1 | 3 | 0 |
| Case 14 | 7 | 45,084,056  | 47,917,495  | 3 | 1 | 4 | 0 |
| Case 14 | 7 | 47,920,371  | 48,093,679  | 2 | 1 | 3 | 0 |
| Case 14 | 7 | 48,098,949  | 50,424,061  | 3 | 1 | 4 | 0 |
| Case 14 | 7 | 50,428,428  | 50,596,926  | 2 | 1 | 3 | 0 |
| Case 14 | 7 | 50,598,703  | 55,468,955  | 3 | 1 | 4 | 0 |
| Case 14 | 7 | 55,479,613  | 58,019,061  | 2 | 1 | 3 | 0 |
| Case 14 | 7 | 61,056,053  | 65,705,693  | 2 | 1 | 3 | 0 |
| Case 14 | 7 | 65,705,936  | 66,452,054  | 3 | 1 | 4 | 0 |
| Case 14 | 7 | 66,453,413  | 68,968,759  | 2 | 1 | 3 | 0 |
| Case 14 | 7 | 68,995,564  | 70,186,936  | 3 | 1 | 4 | 0 |
| Case 14 | 7 | 70,192,653  | 75,238,617  | 2 | 1 | 3 | 0 |
| Case 14 | 7 | 75,240,915  | 82,577,973  | 3 | 1 | 4 | 0 |
| Case 14 | 7 | 82,579,137  | 82,595,653  | 2 | 1 | 3 | 0 |
| Case 14 | 7 | 82,595,736  | 83,996,546  | 3 | 1 | 4 | 0 |
| Case 14 | 7 | 84,010,005  | 111,031,094 | 1 | 1 | 2 | 0 |
| Case 14 | 7 | 111,044,377 | 111,053,822 | 2 | 1 | 3 | 0 |
| Case 14 | 7 | 111,059,886 | 111,251,449 | 0 | 0 | 0 | 0 |
| Case 14 | 7 | 111,265,262 | 111,265,262 | 2 | 1 | 3 | 0 |
| Case 14 | 7 | 111,273,689 | 117,045,256 | 1 | 1 | 2 | 0 |
| Case 14 | 7 | 117,052,915 | 117,312,350 | 2 | 1 | 3 | 0 |
| Case 14 | 7 | 117,314,915 | 142,330,328 | 1 | 1 | 2 | 0 |
| Case 14 | 7 | 142,340,496 | 142,481,301 | 2 | 1 | 3 | 0 |
| Case 14 | 7 | 142,481,317 | 159,119,486 | 1 | 1 | 2 | 0 |
| Case 14 | 8 | 164,984     | 540,949     | 4 | 1 | 5 | 0 |
| Case 14 | 8 | 541,111     | 758,066     | 4 | 0 | 4 | 1 |
| Case 14 | 8 | 769,589     | 1,241,224   | 4 | 1 | 5 | 0 |
| Case 14 | 8 | 1,243,574   | 2,061,497   | 4 | 0 | 4 | 1 |
| Case 14 | 8 | 2,063,158   | 6,377,419   | 4 | 1 | 5 | 0 |
| Case 14 | 8 | 6,377,433   | 8,105,359   | 4 | 0 | 4 | 1 |
| Case 14 | 8 | 8,106,406   | 9,151,237   | 4 | 1 | 5 | 0 |
| Case 14 | 8 | 9,152,517   | 9,288,937   | 4 | 0 | 4 | 1 |
| Case 14 | 8 | 9,290,056   | 10,355,302  | 4 | 1 | 5 | 0 |
| Case 14 | 8 | 10,355,378  | 10,468,039  | 4 | 0 | 4 | 1 |
| Case 14 | 8 | 10,468,172  | 10,579,392  | 4 | 1 | 5 | 0 |
| Case 14 | 8 | 10,583,279  | 11,072,549  | 4 | 0 | 4 | 1 |
| Case 14 | 8 | 11,073,578  | 11,643,742  | 4 | 1 | 5 | 0 |
| Case 14 | 8 | 11,643,803  | 11,710,911  | 4 | 0 | 4 | 1 |
| Case 14 | 8 | 11,711,059  | 12,772,901  | 4 | 1 | 5 | 0 |
| Case 14 | 8 | 12,773,413  | 12,969,055  | 4 | 0 | 4 | 1 |
| Case 14 | 8 | 12,969,754  | 17,390,525  | 4 | 1 | 5 | 0 |
| Case 14 | 8 | 17,390,689  | 17,449,657  | 4 | 0 | 4 | 1 |
| Case 14 | 8 | 17,449,710  | 18,067,463  | 4 | 1 | 5 | 0 |
| Case 14 | 8 | 18,067,697  | 18,080,115  | 4 | 0 | 4 | 1 |
| Case 14 | 8 | 18,080,116  | 19,190,491  | 4 | 1 | 5 | 0 |
| Case 14 | 8 | 19,192,358  | 19,626,356  | 4 | 0 | 4 | 1 |
| Case 14 | 8 | 19,626,439  | 19,997,540  | 4 | 1 | 5 | 0 |
| Case 14 | 8 | 20,001,454  | 20,575,099  | 4 | 0 | 4 | 1 |

|         |   |             |             |   |   |   |   |
|---------|---|-------------|-------------|---|---|---|---|
| Case 14 | 8 | 20,575,213  | 21,019,822  | 4 | 1 | 5 | 0 |
| Case 14 | 8 | 21,025,253  | 21,212,372  | 4 | 0 | 4 | 1 |
| Case 14 | 8 | 21,215,152  | 21,550,800  | 4 | 1 | 5 | 0 |
| Case 14 | 8 | 21,550,858  | 21,862,551  | 4 | 0 | 4 | 1 |
| Case 14 | 8 | 21,866,933  | 21,986,647  | 4 | 1 | 5 | 0 |
| Case 14 | 8 | 21,994,951  | 23,069,718  | 4 | 0 | 4 | 1 |
| Case 14 | 8 | 23,072,256  | 25,021,361  | 4 | 1 | 5 | 0 |
| Case 14 | 8 | 25,025,177  | 25,547,166  | 4 | 0 | 4 | 1 |
| Case 14 | 8 | 25,549,528  | 27,134,100  | 4 | 1 | 5 | 0 |
| Case 14 | 8 | 27,141,452  | 27,463,906  | 4 | 0 | 4 | 1 |
| Case 14 | 8 | 27,464,519  | 27,856,331  | 4 | 1 | 5 | 0 |
| Case 14 | 8 | 27,858,737  | 28,003,774  | 4 | 0 | 4 | 1 |
| Case 14 | 8 | 28,003,817  | 30,537,107  | 4 | 1 | 5 | 0 |
| Case 14 | 8 | 30,538,483  | 30,695,111  | 4 | 0 | 4 | 1 |
| Case 14 | 8 | 30,695,438  | 32,592,627  | 4 | 1 | 5 | 0 |
| Case 14 | 8 | 32,594,251  | 32,954,243  | 4 | 0 | 4 | 1 |
| Case 14 | 8 | 32,959,945  | 33,230,142  | 4 | 1 | 5 | 0 |
| Case 14 | 8 | 33,230,240  | 33,988,414  | 4 | 0 | 4 | 1 |
| Case 14 | 8 | 33,994,378  | 37,462,419  | 4 | 1 | 5 | 0 |
| Case 14 | 8 | 37,469,049  | 38,854,041  | 4 | 0 | 4 | 1 |
| Case 14 | 8 | 38,855,847  | 40,674,845  | 4 | 1 | 5 | 0 |
| Case 14 | 8 | 40,676,775  | 43,066,939  | 4 | 0 | 4 | 1 |
| Case 14 | 8 | 43,086,928  | 43,791,691  | 4 | 1 | 5 | 0 |
| Case 14 | 8 | 46,886,735  | 48,848,992  | 4 | 1 | 5 | 0 |
| Case 14 | 8 | 48,852,225  | 50,445,456  | 4 | 0 | 4 | 1 |
| Case 14 | 8 | 50,462,970  | 51,982,432  | 4 | 1 | 5 | 0 |
| Case 14 | 8 | 51,983,412  | 52,323,869  | 4 | 0 | 4 | 1 |
| Case 14 | 8 | 52,323,870  | 58,788,078  | 4 | 1 | 5 | 0 |
| Case 14 | 8 | 58,789,168  | 146,293,414 | 4 | 0 | 4 | 1 |
| Case 14 | 9 | 46,587      | 46,944,322  | 1 | 1 | 2 | 0 |
| Case 14 | 9 | 65,629,772  | 69,410,435  | 1 | 1 | 2 | 0 |
| Case 14 | 9 | 70,984,372  | 74,300,174  | 3 | 1 | 4 | 0 |
| Case 14 | 9 | 74,300,640  | 74,561,958  | 2 | 1 | 3 | 0 |
| Case 14 | 9 | 74,561,983  | 77,222,828  | 3 | 1 | 4 | 0 |
| Case 14 | 9 | 77,224,088  | 77,476,386  | 2 | 1 | 3 | 0 |
| Case 14 | 9 | 77,486,459  | 80,223,608  | 3 | 1 | 4 | 0 |
| Case 14 | 9 | 80,223,823  | 80,985,484  | 2 | 1 | 3 | 0 |
| Case 14 | 9 | 80,985,638  | 82,949,474  | 3 | 1 | 4 | 0 |
| Case 14 | 9 | 82,949,861  | 83,121,611  | 2 | 1 | 3 | 0 |
| Case 14 | 9 | 83,127,968  | 83,950,550  | 3 | 1 | 4 | 0 |
| Case 14 | 9 | 83,959,411  | 84,609,239  | 2 | 1 | 3 | 0 |
| Case 14 | 9 | 84,609,646  | 85,808,790  | 3 | 1 | 4 | 0 |
| Case 14 | 9 | 85,810,910  | 85,863,392  | 2 | 1 | 3 | 0 |
| Case 14 | 9 | 85,865,631  | 86,111,068  | 3 | 1 | 4 | 0 |
| Case 14 | 9 | 86,111,242  | 86,925,655  | 2 | 1 | 3 | 0 |
| Case 14 | 9 | 86,925,748  | 88,937,856  | 3 | 1 | 4 | 0 |
| Case 14 | 9 | 88,937,943  | 89,293,393  | 2 | 1 | 3 | 0 |
| Case 14 | 9 | 89,296,599  | 89,584,572  | 3 | 1 | 4 | 0 |
| Case 14 | 9 | 89,589,210  | 91,293,114  | 2 | 1 | 3 | 0 |
| Case 14 | 9 | 91,293,885  | 91,449,366  | 3 | 1 | 4 | 0 |
| Case 14 | 9 | 91,456,777  | 91,995,971  | 2 | 1 | 3 | 0 |
| Case 14 | 9 | 91,996,255  | 94,445,809  | 3 | 1 | 4 | 0 |
| Case 14 | 9 | 94,445,943  | 96,082,752  | 2 | 1 | 3 | 0 |
| Case 14 | 9 | 96,082,919  | 97,831,581  | 3 | 1 | 4 | 0 |
| Case 14 | 9 | 97,834,573  | 98,722,130  | 2 | 1 | 3 | 0 |
| Case 14 | 9 | 98,733,782  | 99,086,387  | 3 | 1 | 4 | 0 |
| Case 14 | 9 | 99,086,398  | 103,439,019 | 2 | 1 | 3 | 0 |
| Case 14 | 9 | 103,446,253 | 104,295,764 | 3 | 1 | 4 | 0 |
| Case 14 | 9 | 104,302,625 | 104,433,347 | 2 | 1 | 3 | 0 |
| Case 14 | 9 | 104,437,373 | 107,280,314 | 3 | 1 | 4 | 0 |
| Case 14 | 9 | 107,281,379 | 108,209,066 | 2 | 1 | 3 | 0 |

|         |    |             |             |   |   |   |   |
|---------|----|-------------|-------------|---|---|---|---|
| Case 14 | 9  | 108,211,179 | 109,686,770 | 3 | 1 | 4 | 0 |
| Case 14 | 9  | 109,686,816 | 110,650,284 | 2 | 1 | 3 | 0 |
| Case 14 | 9  | 110,657,726 | 113,662,681 | 3 | 1 | 4 | 0 |
| Case 14 | 9  | 113,665,254 | 114,348,617 | 2 | 1 | 3 | 0 |
| Case 14 | 9  | 114,352,627 | 116,132,092 | 3 | 1 | 4 | 0 |
| Case 14 | 9  | 116,132,231 | 118,012,841 | 2 | 1 | 3 | 0 |
| Case 14 | 9  | 118,013,289 | 118,720,333 | 3 | 1 | 4 | 0 |
| Case 14 | 9  | 118,725,422 | 122,528,499 | 2 | 1 | 3 | 0 |
| Case 14 | 9  | 122,530,528 | 123,524,744 | 3 | 1 | 4 | 0 |
| Case 14 | 9  | 123,525,175 | 123,675,926 | 2 | 1 | 3 | 0 |
| Case 14 | 9  | 123,677,827 | 123,924,470 | 3 | 1 | 4 | 0 |
| Case 14 | 9  | 123,927,222 | 125,963,450 | 2 | 1 | 3 | 0 |
| Case 14 | 9  | 125,973,664 | 126,601,256 | 3 | 1 | 4 | 0 |
| Case 14 | 9  | 126,613,028 | 128,021,166 | 2 | 1 | 3 | 0 |
| Case 14 | 9  | 128,024,049 | 128,239,920 | 1 | 0 | 1 | 0 |
| Case 14 | 9  | 128,240,922 | 128,240,922 | 2 | 1 | 3 | 0 |
| Case 14 | 9  | 128,260,962 | 129,917,249 | 3 | 1 | 4 | 0 |
| Case 14 | 9  | 129,921,983 | 135,132,930 | 2 | 1 | 3 | 0 |
| Case 14 | 9  | 135,133,039 | 136,943,067 | 1 | 1 | 2 | 0 |
| Case 14 | 9  | 136,950,303 | 137,269,456 | 2 | 1 | 3 | 0 |
| Case 14 | 9  | 137,280,939 | 141,066,491 | 1 | 1 | 2 | 0 |
| Case 14 | 10 | 98,087      | 39,097,912  | 1 | 1 | 2 | 0 |
| Case 14 | 10 | 42,436,301  | 46,159,151  | 1 | 1 | 2 | 0 |
| Case 14 | 10 | 46,167,847  | 47,087,813  | 2 | 1 | 3 | 0 |
| Case 14 | 10 | 47,101,942  | 48,320,402  | 3 | 1 | 4 | 0 |
| Case 14 | 10 | 48,324,245  | 68,593,991  | 1 | 1 | 2 | 0 |
| Case 14 | 10 | 68,594,795  | 68,720,630  | 1 | 0 | 1 | 0 |
| Case 14 | 10 | 68,721,071  | 90,079,714  | 1 | 1 | 2 | 0 |
| Case 14 | 10 | 90,093,472  | 90,580,330  | 2 | 1 | 3 | 0 |
| Case 14 | 10 | 90,582,744  | 105,763,026 | 1 | 1 | 2 | 0 |
| Case 14 | 10 | 105,763,178 | 105,817,891 | 2 | 1 | 3 | 0 |
| Case 14 | 10 | 105,819,431 | 118,962,081 | 1 | 1 | 2 | 0 |
| Case 14 | 10 | 118,963,970 | 119,471,827 | 2 | 1 | 3 | 0 |
| Case 14 | 10 | 119,474,930 | 135,477,883 | 1 | 1 | 2 | 0 |
| Case 14 | 11 | 193,146     | 9,258,146   | 1 | 1 | 2 | 0 |
| Case 14 | 11 | 9,262,823   | 9,627,471   | 1 | 0 | 1 | 0 |
| Case 14 | 11 | 9,628,802   | 14,504,463  | 1 | 1 | 2 | 0 |
| Case 14 | 11 | 14,504,658  | 14,907,393  | 1 | 0 | 1 | 0 |
| Case 14 | 11 | 14,909,461  | 18,347,536  | 1 | 1 | 2 | 0 |
| Case 14 | 11 | 18,357,180  | 18,632,984  | 1 | 0 | 1 | 0 |
| Case 14 | 11 | 18,633,897  | 21,841,206  | 1 | 1 | 2 | 0 |
| Case 14 | 11 | 21,846,314  | 22,172,015  | 1 | 0 | 1 | 0 |
| Case 14 | 11 | 22,173,372  | 23,245,030  | 1 | 1 | 2 | 0 |
| Case 14 | 11 | 23,245,183  | 25,860,834  | 1 | 0 | 1 | 0 |
| Case 14 | 11 | 25,864,177  | 28,005,579  | 1 | 1 | 2 | 0 |
| Case 14 | 11 | 28,008,972  | 28,311,769  | 1 | 0 | 1 | 0 |
| Case 14 | 11 | 28,311,790  | 28,977,527  | 1 | 1 | 2 | 0 |
| Case 14 | 11 | 28,979,318  | 29,332,489  | 1 | 0 | 1 | 0 |
| Case 14 | 11 | 29,346,876  | 30,932,903  | 1 | 1 | 2 | 0 |
| Case 14 | 11 | 30,935,629  | 31,690,224  | 1 | 0 | 1 | 0 |
| Case 14 | 11 | 31,705,767  | 37,325,465  | 1 | 1 | 2 | 0 |
| Case 14 | 11 | 37,327,721  | 40,181,413  | 1 | 0 | 1 | 0 |
| Case 14 | 11 | 40,185,254  | 40,277,888  | 1 | 1 | 2 | 0 |
| Case 14 | 11 | 40,280,436  | 42,420,411  | 1 | 0 | 1 | 0 |
| Case 14 | 11 | 42,424,649  | 48,234,357  | 1 | 1 | 2 | 0 |
| Case 14 | 11 | 48,238,455  | 48,250,004  | 1 | 0 | 1 | 0 |
| Case 14 | 11 | 48,264,183  | 50,292,520  | 1 | 1 | 2 | 0 |
| Case 14 | 11 | 50,296,502  | 51,591,253  | 1 | 0 | 1 | 0 |
| Case 14 | 11 | 54,794,237  | 55,026,160  | 0 | 0 | 0 | 0 |
| Case 14 | 11 | 55,027,673  | 55,141,349  | 2 | 0 | 2 | 1 |
| Case 14 | 11 | 55,153,515  | 55,303,865  | 1 | 0 | 1 | 0 |



|         |    |             |             |   |   |   |   |
|---------|----|-------------|-------------|---|---|---|---|
| Case 14 | 11 | 55,305,406  | 79,898,818  | 1 | 1 | 2 | 0 |
| Case 14 | 11 | 79,903,425  | 80,025,521  | 1 | 0 | 1 | 0 |
| Case 14 | 11 | 80,025,850  | 80,283,906  | 1 | 1 | 2 | 0 |
| Case 14 | 11 | 80,293,950  | 80,897,179  | 1 | 0 | 1 | 0 |
| Case 14 | 11 | 80,897,495  | 81,449,443  | 1 | 1 | 2 | 0 |
| Case 14 | 11 | 81,458,413  | 81,771,621  | 1 | 0 | 1 | 0 |
| Case 14 | 11 | 81,774,312  | 82,552,745  | 1 | 1 | 2 | 0 |
| Case 14 | 11 | 82,552,926  | 82,645,190  | 1 | 0 | 1 | 0 |
| Case 14 | 11 | 82,645,246  | 85,868,640  | 2 | 0 | 2 | 1 |
| Case 14 | 11 | 85,869,737  | 86,070,096  | 1 | 0 | 1 | 0 |
| Case 14 | 11 | 86,070,817  | 86,722,128  | 1 | 1 | 2 | 0 |
| Case 14 | 11 | 86,724,086  | 86,743,904  | 1 | 0 | 1 | 0 |
| Case 14 | 11 | 86,748,051  | 87,646,317  | 1 | 1 | 2 | 0 |
| Case 14 | 11 | 87,649,263  | 87,784,344  | 1 | 0 | 1 | 0 |
| Case 14 | 11 | 87,791,487  | 88,252,273  | 2 | 0 | 2 | 1 |
| Case 14 | 11 | 88,252,588  | 91,390,397  | 1 | 0 | 1 | 0 |
| Case 14 | 11 | 91,407,305  | 96,878,089  | 1 | 1 | 2 | 0 |
| Case 14 | 11 | 96,879,194  | 97,093,012  | 1 | 0 | 1 | 0 |
| Case 14 | 11 | 97,102,604  | 97,339,454  | 1 | 1 | 2 | 0 |
| Case 14 | 11 | 97,347,088  | 100,082,000 | 1 | 0 | 1 | 0 |
| Case 14 | 11 | 100,086,730 | 103,024,104 | 1 | 1 | 2 | 0 |
| Case 14 | 11 | 103,024,105 | 103,191,959 | 1 | 0 | 1 | 0 |
| Case 14 | 11 | 103,193,087 | 105,503,658 | 1 | 1 | 2 | 0 |
| Case 14 | 11 | 105,514,964 | 105,844,065 | 1 | 0 | 1 | 0 |
| Case 14 | 11 | 105,850,456 | 106,420,106 | 2 | 0 | 2 | 1 |
| Case 14 | 11 | 106,436,025 | 106,837,790 | 1 | 0 | 1 | 0 |
| Case 14 | 11 | 106,842,124 | 107,502,871 | 1 | 1 | 2 | 0 |
| Case 14 | 11 | 107,503,447 | 108,203,619 | 1 | 0 | 1 | 0 |
| Case 14 | 11 | 108,205,074 | 110,078,284 | 1 | 1 | 2 | 0 |
| Case 14 | 11 | 110,097,651 | 110,336,182 | 1 | 0 | 1 | 0 |
| Case 14 | 11 | 110,341,416 | 114,151,577 | 1 | 1 | 2 | 0 |
| Case 14 | 11 | 114,151,827 | 114,173,835 | 1 | 0 | 1 | 0 |
| Case 14 | 11 | 114,175,276 | 122,441,861 | 1 | 1 | 2 | 0 |
| Case 14 | 11 | 122,446,233 | 122,568,946 | 1 | 0 | 1 | 0 |
| Case 14 | 11 | 122,569,246 | 134,934,063 | 1 | 1 | 2 | 0 |
| Case 14 | 12 | 191,619     | 34,853,011  | 1 | 1 | 2 | 0 |
| Case 14 | 12 | 37,876,400  | 88,854,647  | 1 | 1 | 2 | 0 |
| Case 14 | 12 | 88,866,748  | 89,125,784  | 1 | 0 | 1 | 0 |
| Case 14 | 12 | 89,128,000  | 101,711,341 | 1 | 1 | 2 | 0 |
| Case 14 | 12 | 101,713,141 | 101,785,983 | 2 | 1 | 3 | 0 |
| Case 14 | 12 | 101,787,608 | 102,576,340 | 3 | 1 | 4 | 0 |
| Case 14 | 12 | 102,589,900 | 113,672,577 | 1 | 1 | 2 | 0 |
| Case 14 | 12 | 113,677,451 | 114,106,177 | 1 | 0 | 1 | 0 |
| Case 14 | 12 | 114,114,550 | 133,810,935 | 1 | 1 | 2 | 0 |
| Case 14 | 13 | 19,058,717  | 19,641,229  | 3 | 1 | 4 | 0 |
| Case 14 | 13 | 19,645,637  | 23,539,563  | 2 | 1 | 3 | 0 |
| Case 14 | 13 | 23,546,238  | 23,553,518  | 0 | 0 | 0 | 0 |
| Case 14 | 13 | 23,553,786  | 24,156,765  | 2 | 1 | 3 | 0 |
| Case 14 | 13 | 24,157,969  | 24,521,485  | 3 | 1 | 4 | 0 |
| Case 14 | 13 | 24,524,626  | 28,122,502  | 2 | 1 | 3 | 0 |
| Case 14 | 13 | 28,124,510  | 95,829,681  | 3 | 1 | 4 | 0 |
| Case 14 | 13 | 95,829,870  | 95,930,685  | 2 | 1 | 3 | 0 |
| Case 14 | 13 | 95,931,182  | 115,103,529 | 3 | 1 | 4 | 0 |
| Case 14 | 14 | 19,280,733  | 22,387,318  | 2 | 1 | 3 | 0 |
| Case 14 | 14 | 22,387,839  | 22,964,782  | 3 | 1 | 4 | 0 |
| Case 14 | 14 | 22,966,662  | 44,480,941  | 2 | 1 | 3 | 0 |
| Case 14 | 14 | 44,507,151  | 44,527,629  | 0 | 0 | 0 | 0 |
| Case 14 | 14 | 44,535,160  | 107,287,663 | 2 | 1 | 3 | 0 |
| Case 14 | 15 | 20,034,919  | 32,443,813  | 1 | 1 | 2 | 0 |
| Case 14 | 15 | 32,509,892  | 32,514,341  | 1 | 0 | 1 | 0 |
| Case 14 | 15 | 32,833,659  | 92,469,694  | 1 | 1 | 2 | 0 |

|         |    |            |             |   |   |   |   |
|---------|----|------------|-------------|---|---|---|---|
| Case 14 | 15 | 92,471,689 | 92,528,240  | 3 | 1 | 4 | 0 |
| Case 14 | 15 | 92,528,364 | 102,461,162 | 1 | 1 | 2 | 0 |
| Case 14 | 16 | 88,165     | 18,041,434  | 1 | 1 | 2 | 0 |
| Case 14 | 16 | 18,046,387 | 18,124,560  | 1 | 0 | 1 | 0 |
| Case 14 | 16 | 18,129,657 | 35,285,582  | 1 | 1 | 2 | 0 |
| Case 14 | 16 | 46,450,037 | 69,909,115  | 1 | 1 | 2 | 0 |
| Case 14 | 16 | 69,913,996 | 70,190,597  | 2 | 1 | 3 | 0 |
| Case 14 | 16 | 70,190,676 | 78,571,750  | 1 | 1 | 2 | 0 |
| Case 14 | 16 | 78,572,242 | 78,733,911  | 1 | 0 | 1 | 0 |
| Case 14 | 16 | 78,739,257 | 90,274,695  | 1 | 1 | 2 | 0 |
| Case 14 | 17 | 11,885     | 72,487      | 1 | 0 | 1 | 0 |
| Case 14 | 17 | 73,263     | 129,457     | 2 | 0 | 2 | 1 |
| Case 14 | 17 | 131,435    | 6,331,803   | 1 | 0 | 1 | 0 |
| Case 14 | 17 | 6,331,828  | 6,374,628   | 2 | 0 | 2 | 1 |
| Case 14 | 17 | 6,377,986  | 9,804,399   | 1 | 0 | 1 | 0 |
| Case 14 | 17 | 9,804,493  | 9,816,671   | 2 | 0 | 2 | 1 |
| Case 14 | 17 | 9,818,190  | 10,728,958  | 1 | 0 | 1 | 0 |
| Case 14 | 17 | 10,732,872 | 10,863,677  | 2 | 0 | 2 | 1 |
| Case 14 | 17 | 10,871,773 | 15,309,694  | 1 | 0 | 1 | 0 |
| Case 14 | 17 | 15,316,235 | 15,373,917  | 2 | 0 | 2 | 1 |
| Case 14 | 17 | 15,374,493 | 16,885,886  | 1 | 0 | 1 | 0 |
| Case 14 | 17 | 16,890,221 | 17,105,682  | 2 | 0 | 2 | 1 |
| Case 14 | 17 | 17,106,130 | 21,303,007  | 1 | 0 | 1 | 0 |
| Case 14 | 17 | 21,318,748 | 21,319,849  | 2 | 0 | 2 | 1 |
| Case 14 | 17 | 21,319,909 | 21,528,062  | 1 | 0 | 1 | 0 |
| Case 14 | 17 | 21,539,613 | 22,242,355  | 1 | 1 | 2 | 0 |
| Case 14 | 17 | 25,268,142 | 34,436,708  | 1 | 1 | 2 | 0 |
| Case 14 | 17 | 34,443,811 | 34,815,551  | 2 | 1 | 3 | 0 |
| Case 14 | 17 | 34,819,191 | 37,407,072  | 1 | 1 | 2 | 0 |
| Case 14 | 17 | 37,409,625 | 37,777,235  | 1 | 0 | 1 | 0 |
| Case 14 | 17 | 37,781,849 | 37,824,545  | 2 | 0 | 2 | 1 |
| Case 14 | 17 | 37,825,929 | 37,902,373  | 7 | 0 | 7 | 1 |
| Case 14 | 17 | 37,911,521 | 37,976,469  | 2 | 0 | 2 | 1 |
| Case 14 | 17 | 37,976,501 | 38,040,763  | 7 | 0 | 7 | 1 |
| Case 14 | 17 | 38,049,233 | 38,231,376  | 2 | 0 | 2 | 1 |
| Case 14 | 17 | 38,241,000 | 38,245,791  | 7 | 0 | 7 | 1 |
| Case 14 | 17 | 38,248,354 | 38,405,037  | 2 | 0 | 2 | 1 |
| Case 14 | 17 | 38,406,907 | 38,421,216  | 7 | 0 | 7 | 1 |
| Case 14 | 17 | 38,421,293 | 38,479,831  | 2 | 0 | 2 | 1 |
| Case 14 | 17 | 38,487,528 | 39,005,990  | 1 | 1 | 2 | 0 |
| Case 14 | 17 | 39,007,403 | 39,007,403  | 1 | 0 | 1 | 0 |
| Case 14 | 17 | 39,016,059 | 39,023,875  | 7 | 0 | 7 | 1 |
| Case 14 | 17 | 39,024,037 | 39,087,692  | 2 | 0 | 2 | 1 |
| Case 14 | 17 | 39,092,808 | 39,183,295  | 7 | 0 | 7 | 1 |
| Case 14 | 17 | 39,183,304 | 39,433,211  | 2 | 0 | 2 | 1 |
| Case 14 | 17 | 39,436,638 | 39,527,162  | 7 | 0 | 7 | 1 |
| Case 14 | 17 | 39,531,402 | 39,561,910  | 2 | 0 | 2 | 1 |
| Case 14 | 17 | 39,572,256 | 39,574,318  | 7 | 0 | 7 | 1 |
| Case 14 | 17 | 39,575,349 | 39,577,180  | 2 | 0 | 2 | 1 |
| Case 14 | 17 | 39,577,186 | 39,586,034  | 1 | 0 | 1 | 0 |
| Case 14 | 17 | 39,589,083 | 39,595,536  | 7 | 0 | 7 | 1 |
| Case 14 | 17 | 39,596,538 | 39,739,363  | 2 | 0 | 2 | 1 |
| Case 14 | 17 | 39,743,081 | 39,767,731  | 7 | 0 | 7 | 1 |
| Case 14 | 17 | 39,773,970 | 40,342,247  | 2 | 0 | 2 | 1 |
| Case 14 | 17 | 40,342,279 | 40,439,009  | 1 | 0 | 1 | 0 |
| Case 14 | 17 | 40,441,819 | 40,835,922  | 2 | 0 | 2 | 1 |
| Case 14 | 17 | 40,838,154 | 40,882,852  | 7 | 0 | 7 | 1 |
| Case 14 | 17 | 40,897,470 | 42,457,089  | 2 | 0 | 2 | 1 |
| Case 14 | 17 | 42,457,120 | 43,811,260  | 2 | 1 | 3 | 0 |
| Case 14 | 17 | 43,812,897 | 47,307,274  | 2 | 0 | 2 | 1 |
| Case 14 | 17 | 47,314,413 | 47,406,913  | 1 | 0 | 1 | 0 |

|         |    |            |            |   |   |   |   |
|---------|----|------------|------------|---|---|---|---|
| Case 14 | 17 | 47,412,242 | 48,597,067 | 2 | 1 | 3 | 0 |
| Case 14 | 17 | 48,598,536 | 49,299,294 | 3 | 1 | 4 | 0 |
| Case 14 | 17 | 49,310,655 | 53,853,045 | 1 | 0 | 1 | 0 |
| Case 14 | 17 | 53,854,141 | 53,948,595 | 2 | 0 | 2 | 1 |
| Case 14 | 17 | 53,962,955 | 55,607,672 | 1 | 0 | 1 | 0 |
| Case 14 | 17 | 55,608,091 | 55,839,085 | 2 | 0 | 2 | 1 |
| Case 14 | 17 | 55,840,159 | 57,134,236 | 1 | 0 | 1 | 0 |
| Case 14 | 17 | 57,137,129 | 70,721,707 | 1 | 1 | 2 | 0 |
| Case 14 | 17 | 70,722,862 | 70,905,210 | 1 | 0 | 1 | 0 |
| Case 14 | 17 | 70,908,149 | 81,060,040 | 1 | 1 | 2 | 0 |
| Case 14 | 18 | 87,505     | 905,125    | 1 | 0 | 1 | 0 |
| Case 14 | 18 | 907,710    | 968,021    | 2 | 0 | 2 | 1 |
| Case 14 | 18 | 983,363    | 2,890,900  | 1 | 0 | 1 | 0 |
| Case 14 | 18 | 2,890,946  | 2,908,956  | 2 | 0 | 2 | 1 |
| Case 14 | 18 | 2,909,700  | 8,123,197  | 1 | 0 | 1 | 0 |
| Case 14 | 18 | 8,126,599  | 8,144,269  | 7 | 0 | 7 | 1 |
| Case 14 | 18 | 8,154,136  | 8,154,369  | 2 | 0 | 2 | 1 |
| Case 14 | 18 | 8,172,328  | 9,799,254  | 1 | 0 | 1 | 0 |
| Case 14 | 18 | 9,800,733  | 9,871,870  | 2 | 0 | 2 | 1 |
| Case 14 | 18 | 9,871,956  | 10,306,854 | 1 | 0 | 1 | 0 |
| Case 14 | 18 | 10,309,689 | 10,331,765 | 2 | 0 | 2 | 1 |
| Case 14 | 18 | 10,332,875 | 15,375,878 | 1 | 0 | 1 | 0 |
| Case 14 | 18 | 18,520,354 | 19,348,657 | 1 | 0 | 1 | 0 |
| Case 14 | 18 | 19,351,344 | 20,691,263 | 1 | 1 | 2 | 0 |
| Case 14 | 18 | 20,700,413 | 21,392,567 | 1 | 0 | 1 | 0 |
| Case 14 | 18 | 21,394,409 | 22,274,400 | 1 | 1 | 2 | 0 |
| Case 14 | 18 | 22,277,725 | 23,854,777 | 1 | 0 | 1 | 0 |
| Case 14 | 18 | 23,865,868 | 23,985,498 | 0 | 0 | 0 | 0 |
| Case 14 | 18 | 23,997,267 | 23,997,267 | 2 | 0 | 2 | 1 |
| Case 14 | 18 | 24,004,650 | 29,125,936 | 1 | 0 | 1 | 0 |
| Case 14 | 18 | 29,125,996 | 29,190,174 | 2 | 0 | 2 | 1 |
| Case 14 | 18 | 29,193,385 | 34,936,882 | 1 | 0 | 1 | 0 |
| Case 14 | 18 | 34,944,664 | 35,035,938 | 2 | 0 | 2 | 1 |
| Case 14 | 18 | 35,038,483 | 45,561,707 | 1 | 0 | 1 | 0 |
| Case 14 | 18 | 45,563,098 | 46,001,659 | 2 | 0 | 2 | 1 |
| Case 14 | 18 | 46,002,758 | 46,223,842 | 1 | 0 | 1 | 0 |
| Case 14 | 18 | 46,227,748 | 46,545,924 | 7 | 0 | 7 | 1 |
| Case 14 | 18 | 46,551,306 | 46,564,559 | 2 | 0 | 2 | 1 |
| Case 14 | 18 | 46,567,784 | 47,069,033 | 1 | 0 | 1 | 0 |
| Case 14 | 18 | 47,075,308 | 47,288,909 | 7 | 0 | 7 | 1 |
| Case 14 | 18 | 47,293,738 | 47,308,150 | 2 | 0 | 2 | 1 |
| Case 14 | 18 | 47,309,909 | 47,445,407 | 1 | 0 | 1 | 0 |
| Case 14 | 18 | 47,447,432 | 47,730,011 | 2 | 0 | 2 | 1 |
| Case 14 | 18 | 47,735,152 | 48,100,072 | 1 | 0 | 1 | 0 |
| Case 14 | 18 | 48,106,595 | 48,241,573 | 2 | 0 | 2 | 1 |
| Case 14 | 18 | 48,241,746 | 50,943,685 | 1 | 0 | 1 | 0 |
| Case 14 | 18 | 50,960,222 | 51,656,039 | 7 | 0 | 7 | 1 |
| Case 14 | 18 | 51,674,135 | 51,688,955 | 2 | 0 | 2 | 1 |
| Case 14 | 18 | 51,698,312 | 54,694,151 | 1 | 0 | 1 | 0 |
| Case 14 | 18 | 54,694,242 | 54,762,024 | 2 | 0 | 2 | 1 |
| Case 14 | 18 | 54,763,828 | 56,103,573 | 1 | 0 | 1 | 0 |
| Case 14 | 18 | 56,105,868 | 56,203,788 | 2 | 0 | 2 | 1 |
| Case 14 | 18 | 56,203,837 | 56,667,515 | 1 | 0 | 1 | 0 |
| Case 14 | 18 | 56,668,510 | 56,745,144 | 7 | 0 | 7 | 1 |
| Case 14 | 18 | 56,747,782 | 56,810,775 | 2 | 0 | 2 | 1 |
| Case 14 | 18 | 56,813,295 | 71,496,928 | 1 | 0 | 1 | 0 |
| Case 14 | 18 | 71,497,474 | 71,559,968 | 2 | 0 | 2 | 1 |
| Case 14 | 18 | 71,560,116 | 71,877,967 | 1 | 0 | 1 | 0 |
| Case 14 | 18 | 71,878,838 | 71,960,136 | 2 | 0 | 2 | 1 |
| Case 14 | 18 | 71,971,089 | 72,082,944 | 1 | 0 | 1 | 0 |
| Case 14 | 18 | 72,086,601 | 72,185,872 | 2 | 0 | 2 | 1 |

|         |    |            |            |   |   |   |   |
|---------|----|------------|------------|---|---|---|---|
| Case 14 | 18 | 72,186,306 | 72,698,759 | 1 | 0 | 1 | 0 |
| Case 14 | 18 | 72,727,451 | 72,944,256 | 2 | 0 | 2 | 1 |
| Case 14 | 18 | 72,945,714 | 73,122,598 | 2 | 1 | 3 | 0 |
| Case 14 | 18 | 73,124,672 | 73,286,426 | 1 | 1 | 2 | 0 |
| Case 14 | 18 | 73,287,109 | 77,287,796 | 1 | 0 | 1 | 0 |
| Case 14 | 18 | 77,288,806 | 77,539,764 | 2 | 0 | 2 | 1 |
| Case 14 | 18 | 77,545,200 | 78,015,180 | 1 | 0 | 1 | 0 |
| Case 14 | 19 | 260,912    | 727,021    | 1 | 1 | 2 | 0 |
| Case 14 | 19 | 730,030    | 757,752    | 1 | 0 | 1 | 0 |
| Case 14 | 19 | 757,868    | 9,226,265  | 1 | 1 | 2 | 0 |
| Case 14 | 19 | 9,226,425  | 9,967,957  | 1 | 0 | 1 | 0 |
| Case 14 | 19 | 9,968,062  | 10,071,365 | 1 | 1 | 2 | 0 |
| Case 14 | 19 | 10,071,433 | 10,081,900 | 1 | 0 | 1 | 0 |
| Case 14 | 19 | 10,081,919 | 11,713,933 | 1 | 1 | 2 | 0 |
| Case 14 | 19 | 11,727,503 | 12,719,846 | 1 | 0 | 1 | 0 |
| Case 14 | 19 | 12,721,401 | 17,922,777 | 1 | 1 | 2 | 0 |
| Case 14 | 19 | 17,922,795 | 17,974,223 | 1 | 0 | 1 | 0 |
| Case 14 | 19 | 17,975,630 | 19,790,255 | 1 | 1 | 2 | 0 |
| Case 14 | 19 | 19,790,421 | 24,629,285 | 1 | 0 | 1 | 0 |
| Case 14 | 19 | 27,732,159 | 28,411,624 | 1 | 0 | 1 | 0 |
| Case 14 | 19 | 28,414,404 | 30,067,525 | 1 | 1 | 2 | 0 |
| Case 14 | 19 | 30,068,893 | 30,610,400 | 1 | 0 | 1 | 0 |
| Case 14 | 19 | 30,612,444 | 36,651,499 | 1 | 1 | 2 | 0 |
| Case 14 | 19 | 36,652,185 | 38,362,792 | 1 | 0 | 1 | 0 |
| Case 14 | 19 | 38,375,666 | 40,502,919 | 1 | 1 | 2 | 0 |
| Case 14 | 19 | 40,502,943 | 40,877,284 | 1 | 0 | 1 | 0 |
| Case 14 | 19 | 40,877,595 | 52,528,944 | 1 | 1 | 2 | 0 |
| Case 14 | 19 | 52,529,074 | 53,765,130 | 1 | 0 | 1 | 0 |
| Case 14 | 19 | 53,767,570 | 53,831,824 | 1 | 1 | 2 | 0 |
| Case 14 | 19 | 53,833,668 | 54,313,859 | 1 | 0 | 1 | 0 |
| Case 14 | 19 | 54,313,891 | 57,608,342 | 1 | 1 | 2 | 0 |
| Case 14 | 19 | 57,608,596 | 58,048,573 | 1 | 0 | 1 | 0 |
| Case 14 | 19 | 58,048,625 | 58,115,735 | 2 | 0 | 2 | 1 |
| Case 14 | 19 | 58,116,143 | 58,494,665 | 1 | 0 | 1 | 0 |
| Case 14 | 19 | 58,495,059 | 59,097,160 | 1 | 1 | 2 | 0 |
| Case 14 | 20 | 63,244     | 14,673,838 | 2 | 1 | 3 | 0 |
| Case 14 | 20 | 14,675,433 | 15,251,031 | 2 | 0 | 2 | 1 |
| Case 14 | 20 | 15,254,051 | 26,293,985 | 2 | 1 | 3 | 0 |
| Case 14 | 20 | 29,425,357 | 62,948,788 | 2 | 1 | 3 | 0 |
| Case 14 | 21 | 10,827,533 | 10,971,337 | 1 | 0 | 1 | 0 |
| Case 14 | 21 | 14,368,320 | 21,817,825 | 1 | 0 | 1 | 0 |
| Case 14 | 21 | 21,819,397 | 21,996,784 | 0 | 0 | 0 | 0 |
| Case 14 | 21 | 22,004,301 | 22,008,812 | 2 | 0 | 2 | 1 |
| Case 14 | 21 | 22,011,190 | 23,505,563 | 1 | 0 | 1 | 0 |
| Case 14 | 21 | 23,508,014 | 23,986,788 | 0 | 0 | 0 | 0 |
| Case 14 | 21 | 23,990,758 | 24,022,927 | 2 | 0 | 2 | 1 |
| Case 14 | 21 | 24,025,851 | 24,350,599 | 1 | 0 | 1 | 0 |
| Case 14 | 21 | 24,363,308 | 24,613,586 | 0 | 0 | 0 | 0 |
| Case 14 | 21 | 24,614,063 | 24,623,888 | 2 | 0 | 2 | 1 |
| Case 14 | 21 | 24,627,762 | 26,196,745 | 1 | 0 | 1 | 0 |
| Case 14 | 21 | 26,198,457 | 26,735,187 | 0 | 0 | 0 | 0 |
| Case 14 | 21 | 26,749,158 | 32,216,253 | 1 | 0 | 1 | 0 |
| Case 14 | 21 | 32,218,481 | 32,415,963 | 1 | 1 | 2 | 0 |
| Case 14 | 21 | 32,423,084 | 32,484,078 | 1 | 0 | 1 | 0 |
| Case 14 | 21 | 32,485,200 | 34,707,387 | 2 | 0 | 2 | 1 |
| Case 14 | 21 | 34,707,868 | 34,854,711 | 1 | 0 | 1 | 0 |
| Case 14 | 21 | 34,856,636 | 37,484,942 | 2 | 0 | 2 | 1 |
| Case 14 | 21 | 37,485,062 | 37,563,298 | 1 | 0 | 1 | 0 |
| Case 14 | 21 | 37,566,153 | 37,626,080 | 2 | 0 | 2 | 1 |
| Case 14 | 21 | 37,626,109 | 37,777,625 | 1 | 0 | 1 | 0 |
| Case 14 | 21 | 37,780,822 | 38,436,825 | 1 | 1 | 2 | 0 |

|         |    |             |             |   |   |   |   |
|---------|----|-------------|-------------|---|---|---|---|
| Case 14 | 21 | 38,437,907  | 38,437,907  | 2 | 0 | 2 | 1 |
| Case 14 | 21 | 38,437,951  | 38,537,924  | 1 | 0 | 1 | 0 |
| Case 14 | 21 | 38,538,018  | 40,765,146  | 2 | 0 | 2 | 1 |
| Case 14 | 21 | 40,772,436  | 40,843,234  | 1 | 0 | 1 | 0 |
| Case 14 | 21 | 40,844,300  | 43,869,663  | 2 | 0 | 2 | 1 |
| Case 14 | 21 | 43,875,734  | 44,720,807  | 1 | 1 | 2 | 0 |
| Case 14 | 21 | 44,721,579  | 44,734,007  | 1 | 0 | 1 | 0 |
| Case 14 | 21 | 44,737,883  | 46,930,092  | 2 | 0 | 2 | 1 |
| Case 14 | 21 | 46,930,138  | 46,956,571  | 1 | 0 | 1 | 0 |
| Case 14 | 21 | 46,957,695  | 48,100,155  | 1 | 1 | 2 | 0 |
| Case 14 | 22 | 16,114,244  | 17,733,896  | 1 | 0 | 1 | 0 |
| Case 14 | 22 | 17,738,100  | 17,910,586  | 2 | 0 | 2 | 1 |
| Case 14 | 22 | 17,910,844  | 18,435,794  | 1 | 0 | 1 | 0 |
| Case 14 | 22 | 18,438,485  | 51,195,728  | 2 | 0 | 2 | 1 |
| Case 16 | 1  | 82,154      | 2,560,808   | 2 | 1 | 3 | 0 |
| Case 16 | 1  | 2,560,818   | 2,909,170   | 1 | 1 | 2 | 0 |
| Case 16 | 1  | 2,917,377   | 5,924,071   | 2 | 1 | 3 | 0 |
| Case 16 | 1  | 5,924,483   | 6,475,686   | 1 | 1 | 2 | 0 |
| Case 16 | 1  | 6,479,372   | 35,373,878  | 2 | 1 | 3 | 0 |
| Case 16 | 1  | 35,378,934  | 35,892,371  | 1 | 1 | 2 | 0 |
| Case 16 | 1  | 35,899,006  | 121,346,616 | 2 | 1 | 3 | 0 |
| Case 16 | 1  | 142,649,718 | 143,418,972 | 2 | 1 | 3 | 0 |
| Case 16 | 1  | 143,720,409 | 145,567,084 | 2 | 2 | 4 | 0 |
| Case 16 | 1  | 145,567,446 | 147,371,120 | 4 | 1 | 5 | 0 |
| Case 16 | 1  | 147,373,447 | 153,034,230 | 3 | 1 | 4 | 0 |
| Case 16 | 1  | 153,037,463 | 153,410,822 | 4 | 1 | 5 | 0 |
| Case 16 | 1  | 153,420,475 | 153,941,030 | 3 | 1 | 4 | 0 |
| Case 16 | 1  | 153,941,105 | 154,737,236 | 4 | 1 | 5 | 0 |
| Case 16 | 1  | 154,742,575 | 156,933,019 | 3 | 1 | 4 | 0 |
| Case 16 | 1  | 156,937,916 | 157,884,976 | 4 | 1 | 5 | 0 |
| Case 16 | 1  | 157,891,524 | 158,300,604 | 3 | 1 | 4 | 0 |
| Case 16 | 1  | 158,300,684 | 159,799,910 | 4 | 1 | 5 | 0 |
| Case 16 | 1  | 159,799,917 | 161,205,693 | 3 | 1 | 4 | 0 |
| Case 16 | 1  | 161,206,230 | 161,908,338 | 4 | 1 | 5 | 0 |
| Case 16 | 1  | 161,915,501 | 162,173,395 | 3 | 1 | 4 | 0 |
| Case 16 | 1  | 162,175,972 | 172,100,831 | 5 | 0 | 5 | 1 |
| Case 16 | 1  | 172,101,666 | 172,267,419 | 6 | 0 | 6 | 1 |
| Case 16 | 1  | 172,267,554 | 172,696,653 | 5 | 0 | 5 | 1 |
| Case 16 | 1  | 172,699,579 | 173,486,716 | 6 | 0 | 6 | 1 |
| Case 16 | 1  | 173,494,019 | 174,469,905 | 5 | 0 | 5 | 1 |
| Case 16 | 1  | 174,479,498 | 174,611,708 | 6 | 0 | 6 | 1 |
| Case 16 | 1  | 174,623,077 | 174,623,077 | 3 | 3 | 6 | 0 |
| Case 16 | 1  | 174,623,922 | 174,681,384 | 7 | 0 | 7 | 1 |
| Case 16 | 1  | 174,709,679 | 174,709,679 | 2 | 0 | 2 | 1 |
| Case 16 | 1  | 174,715,051 | 174,903,882 | 1 | 0 | 1 | 0 |
| Case 16 | 1  | 174,926,686 | 174,926,686 | 2 | 0 | 2 | 1 |
| Case 16 | 1  | 174,934,586 | 174,937,352 | 4 | 0 | 4 | 1 |
| Case 16 | 1  | 174,951,749 | 187,055,561 | 5 | 0 | 5 | 1 |
| Case 16 | 1  | 187,057,636 | 187,902,981 | 6 | 0 | 6 | 1 |
| Case 16 | 1  | 187,903,176 | 189,971,441 | 5 | 0 | 5 | 1 |
| Case 16 | 1  | 189,973,857 | 190,108,881 | 6 | 0 | 6 | 1 |
| Case 16 | 1  | 190,112,653 | 190,549,233 | 5 | 0 | 5 | 1 |
| Case 16 | 1  | 190,551,418 | 191,870,504 | 6 | 0 | 6 | 1 |
| Case 16 | 1  | 191,872,334 | 193,045,734 | 5 | 0 | 5 | 1 |
| Case 16 | 1  | 193,046,073 | 196,651,832 | 6 | 0 | 6 | 1 |
| Case 16 | 1  | 196,654,324 | 197,913,157 | 5 | 0 | 5 | 1 |
| Case 16 | 1  | 197,919,693 | 198,485,706 | 6 | 0 | 6 | 1 |
| Case 16 | 1  | 198,489,457 | 245,851,609 | 5 | 0 | 5 | 1 |
| Case 16 | 1  | 245,852,388 | 245,861,513 | 6 | 0 | 6 | 1 |
| Case 16 | 1  | 245,861,522 | 245,865,900 | 3 | 2 | 5 | 0 |
| Case 16 | 1  | 245,866,511 | 245,884,152 | 7 | 0 | 7 | 1 |

|         |   |             |             |   |   |   |   |
|---------|---|-------------|-------------|---|---|---|---|
| Case 16 | 1 | 245,900,039 | 245,900,039 | 2 | 0 | 2 | 1 |
| Case 16 | 1 | 245,901,545 | 246,028,908 | 1 | 0 | 1 | 0 |
| Case 16 | 1 | 246,029,064 | 246,029,064 | 2 | 0 | 2 | 1 |
| Case 16 | 1 | 246,030,183 | 246,030,183 | 4 | 0 | 4 | 1 |
| Case 16 | 1 | 246,034,491 | 246,341,231 | 5 | 0 | 5 | 1 |
| Case 16 | 1 | 246,344,768 | 246,345,154 | 6 | 0 | 6 | 1 |
| Case 16 | 1 | 246,346,297 | 246,353,934 | 3 | 2 | 5 | 0 |
| Case 16 | 1 | 246,355,668 | 246,364,811 | 7 | 0 | 7 | 1 |
| Case 16 | 1 | 246,373,295 | 246,373,295 | 2 | 0 | 2 | 1 |
| Case 16 | 1 | 246,374,869 | 246,518,362 | 1 | 0 | 1 | 0 |
| Case 16 | 1 | 246,521,189 | 246,521,189 | 2 | 0 | 2 | 1 |
| Case 16 | 1 | 246,527,984 | 246,531,703 | 4 | 0 | 4 | 1 |
| Case 16 | 1 | 246,534,452 | 249,218,992 | 5 | 0 | 5 | 1 |
| Case 16 | 2 | 18,674      | 19,952,381  | 2 | 2 | 4 | 0 |
| Case 16 | 2 | 19,954,038  | 20,197,017  | 2 | 1 | 3 | 0 |
| Case 16 | 2 | 20,197,018  | 65,355,744  | 2 | 2 | 4 | 0 |
| Case 16 | 2 | 65,364,702  | 65,402,878  | 4 | 1 | 5 | 0 |
| Case 16 | 2 | 65,413,746  | 92,081,640  | 2 | 2 | 4 | 0 |
| Case 16 | 2 | 95,429,424  | 129,451,446 | 2 | 2 | 4 | 0 |
| Case 16 | 2 | 129,451,757 | 129,467,773 | 6 | 1 | 7 | 0 |
| Case 16 | 2 | 129,471,297 | 134,206,763 | 2 | 2 | 4 | 0 |
| Case 16 | 2 | 134,207,106 | 134,213,436 | 2 | 1 | 3 | 0 |
| Case 16 | 2 | 134,214,728 | 134,528,954 | 3 | 0 | 3 | 1 |
| Case 16 | 2 | 134,529,098 | 134,529,356 | 2 | 0 | 2 | 1 |
| Case 16 | 2 | 134,531,412 | 134,531,412 | 2 | 1 | 3 | 0 |
| Case 16 | 2 | 134,532,317 | 219,892,928 | 2 | 2 | 4 | 0 |
| Case 16 | 2 | 219,894,260 | 220,011,092 | 2 | 1 | 3 | 0 |
| Case 16 | 2 | 220,011,430 | 243,048,760 | 2 | 2 | 4 | 0 |
| Case 16 | 3 | 61,495      | 45,030,749  | 2 | 1 | 3 | 0 |
| Case 16 | 3 | 45,034,411  | 51,266,985  | 2 | 0 | 2 | 1 |
| Case 16 | 3 | 51,274,967  | 57,822,422  | 2 | 1 | 3 | 0 |
| Case 16 | 3 | 57,822,950  | 57,978,283  | 2 | 0 | 2 | 1 |
| Case 16 | 3 | 57,978,556  | 60,349,462  | 2 | 1 | 3 | 0 |
| Case 16 | 3 | 60,350,709  | 60,360,747  | 1 | 1 | 2 | 0 |
| Case 16 | 3 | 60,364,676  | 60,572,073  | 0 | 0 | 0 | 0 |
| Case 16 | 3 | 60,573,681  | 60,643,045  | 1 | 0 | 1 | 0 |
| Case 16 | 3 | 60,647,540  | 60,655,448  | 2 | 0 | 2 | 1 |
| Case 16 | 3 | 60,657,068  | 90,442,925  | 2 | 1 | 3 | 0 |
| Case 16 | 3 | 93,537,290  | 93,803,041  | 2 | 1 | 3 | 0 |
| Case 16 | 3 | 93,803,061  | 100,014,146 | 2 | 2 | 4 | 0 |
| Case 16 | 3 | 100,014,606 | 100,479,384 | 2 | 1 | 3 | 0 |
| Case 16 | 3 | 100,480,812 | 103,831,303 | 2 | 2 | 4 | 0 |
| Case 16 | 3 | 103,831,895 | 104,822,019 | 2 | 1 | 3 | 0 |
| Case 16 | 3 | 104,825,919 | 113,321,199 | 2 | 2 | 4 | 0 |
| Case 16 | 3 | 113,321,950 | 115,571,364 | 2 | 1 | 3 | 0 |
| Case 16 | 3 | 115,575,949 | 118,779,507 | 2 | 2 | 4 | 0 |
| Case 16 | 3 | 118,781,005 | 122,885,247 | 2 | 1 | 3 | 0 |
| Case 16 | 3 | 122,886,174 | 124,381,439 | 2 | 2 | 4 | 0 |
| Case 16 | 3 | 124,385,301 | 130,409,494 | 2 | 1 | 3 | 0 |
| Case 16 | 3 | 130,422,592 | 133,538,515 | 2 | 2 | 4 | 0 |
| Case 16 | 3 | 133,538,548 | 134,538,797 | 2 | 1 | 3 | 0 |
| Case 16 | 3 | 134,544,299 | 135,153,284 | 2 | 2 | 4 | 0 |
| Case 16 | 3 | 135,167,677 | 136,879,530 | 2 | 1 | 3 | 0 |
| Case 16 | 3 | 136,882,119 | 138,156,543 | 2 | 2 | 4 | 0 |
| Case 16 | 3 | 138,176,414 | 140,435,469 | 2 | 1 | 3 | 0 |
| Case 16 | 3 | 140,445,224 | 159,614,512 | 2 | 2 | 4 | 0 |
| Case 16 | 3 | 159,625,545 | 159,814,546 | 2 | 1 | 3 | 0 |
| Case 16 | 3 | 159,819,567 | 164,269,269 | 2 | 2 | 4 | 0 |
| Case 16 | 3 | 164,272,414 | 165,769,683 | 2 | 1 | 3 | 0 |
| Case 16 | 3 | 165,778,002 | 180,037,359 | 2 | 2 | 4 | 0 |
| Case 16 | 3 | 180,042,078 | 180,799,879 | 2 | 1 | 3 | 0 |

|         |   |             |             |   |   |   |   |
|---------|---|-------------|-------------|---|---|---|---|
| Case 16 | 3 | 180,831,977 | 183,691,451 | 2 | 2 | 4 | 0 |
| Case 16 | 3 | 183,691,725 | 184,216,196 | 2 | 1 | 3 | 0 |
| Case 16 | 3 | 184,216,307 | 194,780,749 | 2 | 2 | 4 | 0 |
| Case 16 | 3 | 194,785,443 | 195,827,205 | 2 | 1 | 3 | 0 |
| Case 16 | 3 | 195,837,423 | 196,384,865 | 2 | 2 | 4 | 0 |
| Case 16 | 3 | 196,386,693 | 197,838,262 | 2 | 1 | 3 | 0 |
| Case 16 | 4 | 71,566      | 442,021     | 2 | 0 | 2 | 1 |
| Case 16 | 4 | 445,794     | 17,765,622  | 2 | 1 | 3 | 0 |
| Case 16 | 4 | 17,769,238  | 20,959,057  | 2 | 0 | 2 | 1 |
| Case 16 | 4 | 20,960,640  | 35,333,439  | 2 | 1 | 3 | 0 |
| Case 16 | 4 | 35,348,509  | 35,583,122  | 1 | 1 | 2 | 0 |
| Case 16 | 4 | 35,588,460  | 49,620,898  | 2 | 1 | 3 | 0 |
| Case 16 | 4 | 52,697,856  | 91,534,943  | 2 | 1 | 3 | 0 |
| Case 16 | 4 | 91,546,159  | 91,729,462  | 2 | 0 | 2 | 1 |
| Case 16 | 4 | 91,732,390  | 117,863,273 | 2 | 1 | 3 | 0 |
| Case 16 | 4 | 117,863,537 | 118,165,691 | 1 | 1 | 2 | 0 |
| Case 16 | 4 | 118,185,220 | 190,963,766 | 2 | 1 | 3 | 0 |
| Case 16 | 5 | 38,139      | 163,536     | 4 | 1 | 5 | 0 |
| Case 16 | 5 | 163,554     | 2,920,692   | 3 | 1 | 4 | 0 |
| Case 16 | 5 | 2,922,114   | 2,922,427   | 3 | 2 | 5 | 0 |
| Case 16 | 5 | 2,923,396   | 3,084,205   | 4 | 1 | 5 | 0 |
| Case 16 | 5 | 3,086,514   | 3,086,934   | 3 | 2 | 5 | 0 |
| Case 16 | 5 | 3,088,781   | 3,273,318   | 3 | 1 | 4 | 0 |
| Case 16 | 5 | 3,281,517   | 15,298,906  | 3 | 2 | 5 | 0 |
| Case 16 | 5 | 15,310,572  | 26,193,999  | 4 | 1 | 5 | 0 |
| Case 16 | 5 | 26,199,587  | 26,263,051  | 2 | 2 | 4 | 0 |
| Case 16 | 5 | 26,265,398  | 26,265,398  | 7 | 0 | 7 | 1 |
| Case 16 | 5 | 26,266,929  | 40,692,317  | 3 | 2 | 5 | 0 |
| Case 16 | 5 | 40,692,940  | 46,399,093  | 4 | 1 | 5 | 0 |
| Case 16 | 5 | 49,457,282  | 101,228,173 | 2 | 1 | 3 | 0 |
| Case 16 | 5 | 101,234,121 | 101,394,874 | 1 | 1 | 2 | 0 |
| Case 16 | 5 | 101,395,391 | 180,693,127 | 2 | 1 | 3 | 0 |
| Case 16 | 6 | 108,666     | 1,613,686   | 2 | 2 | 4 | 0 |
| Case 16 | 6 | 1,617,143   | 1,921,848   | 2 | 1 | 3 | 0 |
| Case 16 | 6 | 1,926,650   | 2,293,020   | 1 | 1 | 2 | 0 |
| Case 16 | 6 | 2,329,168   | 2,445,903   | 2 | 1 | 3 | 0 |
| Case 16 | 6 | 2,447,602   | 25,966,909  | 2 | 2 | 4 | 0 |
| Case 16 | 6 | 25,967,019  | 26,608,261  | 2 | 1 | 3 | 0 |
| Case 16 | 6 | 26,608,325  | 29,445,495  | 2 | 2 | 4 | 0 |
| Case 16 | 6 | 29,446,632  | 29,550,416  | 4 | 1 | 5 | 0 |
| Case 16 | 6 | 29,550,618  | 29,662,374  | 2 | 2 | 4 | 0 |
| Case 16 | 6 | 29,662,443  | 29,771,879  | 2 | 1 | 3 | 0 |
| Case 16 | 6 | 29,772,395  | 31,271,157  | 2 | 2 | 4 | 0 |
| Case 16 | 6 | 31,271,270  | 31,352,902  | 2 | 1 | 3 | 0 |
| Case 16 | 6 | 31,353,593  | 31,547,689  | 2 | 2 | 4 | 0 |
| Case 16 | 6 | 31,547,792  | 32,150,560  | 2 | 1 | 3 | 0 |
| Case 16 | 6 | 32,150,663  | 42,575,723  | 2 | 2 | 4 | 0 |
| Case 16 | 6 | 42,579,963  | 43,163,933  | 2 | 1 | 3 | 0 |
| Case 16 | 6 | 43,164,501  | 58,752,089  | 2 | 2 | 4 | 0 |
| Case 16 | 6 | 61,891,118  | 70,003,609  | 2 | 2 | 4 | 0 |
| Case 16 | 6 | 70,003,822  | 94,005,099  | 2 | 1 | 3 | 0 |
| Case 16 | 6 | 94,008,535  | 97,058,451  | 1 | 1 | 2 | 0 |
| Case 16 | 6 | 97,058,515  | 97,476,678  | 2 | 1 | 3 | 0 |
| Case 16 | 6 | 97,489,770  | 98,638,360  | 1 | 1 | 2 | 0 |
| Case 16 | 6 | 98,646,199  | 99,801,698  | 2 | 1 | 3 | 0 |
| Case 16 | 6 | 99,803,269  | 100,428,029 | 1 | 1 | 2 | 0 |
| Case 16 | 6 | 100,428,313 | 102,505,857 | 2 | 1 | 3 | 0 |
| Case 16 | 6 | 102,511,846 | 104,625,659 | 1 | 1 | 2 | 0 |
| Case 16 | 6 | 104,628,972 | 107,295,198 | 2 | 1 | 3 | 0 |
| Case 16 | 6 | 107,298,061 | 107,742,215 | 1 | 1 | 2 | 0 |
| Case 16 | 6 | 107,754,363 | 108,294,470 | 2 | 1 | 3 | 0 |

|         |   |             |             |   |   |   |   |
|---------|---|-------------|-------------|---|---|---|---|
| Case 16 | 6 | 108,300,912 | 108,867,031 | 1 | 1 | 2 | 0 |
| Case 16 | 6 | 108,875,645 | 109,771,257 | 2 | 1 | 3 | 0 |
| Case 16 | 6 | 109,771,258 | 110,732,314 | 1 | 1 | 2 | 0 |
| Case 16 | 6 | 110,732,736 | 111,543,412 | 2 | 1 | 3 | 0 |
| Case 16 | 6 | 111,548,813 | 111,935,682 | 1 | 1 | 2 | 0 |
| Case 16 | 6 | 111,936,578 | 112,508,770 | 2 | 1 | 3 | 0 |
| Case 16 | 6 | 112,510,336 | 112,972,697 | 1 | 1 | 2 | 0 |
| Case 16 | 6 | 112,973,229 | 113,972,650 | 2 | 1 | 3 | 0 |
| Case 16 | 6 | 113,975,118 | 118,214,352 | 1 | 1 | 2 | 0 |
| Case 16 | 6 | 118,214,732 | 119,946,363 | 2 | 1 | 3 | 0 |
| Case 16 | 6 | 119,949,791 | 123,236,650 | 1 | 1 | 2 | 0 |
| Case 16 | 6 | 123,238,525 | 123,672,656 | 2 | 1 | 3 | 0 |
| Case 16 | 6 | 123,673,686 | 125,172,488 | 1 | 1 | 2 | 0 |
| Case 16 | 6 | 125,175,526 | 128,223,935 | 2 | 1 | 3 | 0 |
| Case 16 | 6 | 128,239,412 | 129,604,372 | 1 | 1 | 2 | 0 |
| Case 16 | 6 | 129,605,056 | 132,920,150 | 2 | 1 | 3 | 0 |
| Case 16 | 6 | 132,921,520 | 133,625,980 | 1 | 1 | 2 | 0 |
| Case 16 | 6 | 133,631,190 | 134,704,195 | 2 | 1 | 3 | 0 |
| Case 16 | 6 | 134,706,333 | 135,022,152 | 1 | 1 | 2 | 0 |
| Case 16 | 6 | 135,022,253 | 137,112,958 | 2 | 1 | 3 | 0 |
| Case 16 | 6 | 137,113,248 | 137,454,459 | 1 | 1 | 2 | 0 |
| Case 16 | 6 | 137,462,218 | 138,967,387 | 2 | 1 | 3 | 0 |
| Case 16 | 6 | 138,970,367 | 139,167,807 | 1 | 1 | 2 | 0 |
| Case 16 | 6 | 139,170,412 | 140,251,292 | 2 | 1 | 3 | 0 |
| Case 16 | 6 | 140,253,023 | 142,921,498 | 1 | 1 | 2 | 0 |
| Case 16 | 6 | 142,922,061 | 150,052,782 | 2 | 1 | 3 | 0 |
| Case 16 | 6 | 150,057,748 | 150,330,061 | 1 | 1 | 2 | 0 |
| Case 16 | 6 | 150,338,065 | 170,980,171 | 2 | 1 | 3 | 0 |
| Case 16 | 7 | 44,935      | 7,854,806   | 5 | 0 | 5 | 1 |
| Case 16 | 7 | 7,856,669   | 8,060,056   | 6 | 0 | 6 | 1 |
| Case 16 | 7 | 8,062,590   | 9,101,172   | 5 | 0 | 5 | 1 |
| Case 16 | 7 | 9,102,112   | 10,749,914  | 6 | 0 | 6 | 1 |
| Case 16 | 7 | 10,750,560  | 11,593,963  | 5 | 0 | 5 | 1 |
| Case 16 | 7 | 11,595,832  | 13,887,745  | 6 | 0 | 6 | 1 |
| Case 16 | 7 | 13,889,107  | 14,534,248  | 5 | 0 | 5 | 1 |
| Case 16 | 7 | 14,537,224  | 16,342,982  | 6 | 0 | 6 | 1 |
| Case 16 | 7 | 16,346,213  | 16,622,785  | 5 | 0 | 5 | 1 |
| Case 16 | 7 | 16,627,015  | 20,104,908  | 6 | 0 | 6 | 1 |
| Case 16 | 7 | 20,114,589  | 38,064,082  | 5 | 0 | 5 | 1 |
| Case 16 | 7 | 38,064,636  | 38,385,938  | 6 | 0 | 6 | 1 |
| Case 16 | 7 | 38,412,022  | 46,314,463  | 5 | 0 | 5 | 1 |
| Case 16 | 7 | 46,320,115  | 46,894,870  | 6 | 0 | 6 | 1 |
| Case 16 | 7 | 46,899,150  | 48,294,575  | 5 | 0 | 5 | 1 |
| Case 16 | 7 | 48,308,588  | 48,375,867  | 6 | 0 | 6 | 1 |
| Case 16 | 7 | 48,376,158  | 52,245,441  | 5 | 0 | 5 | 1 |
| Case 16 | 7 | 52,246,309  | 52,722,258  | 6 | 0 | 6 | 1 |
| Case 16 | 7 | 52,722,432  | 57,528,311  | 5 | 0 | 5 | 1 |
| Case 16 | 7 | 57,529,604  | 58,019,061  | 6 | 0 | 6 | 1 |
| Case 16 | 7 | 61,056,053  | 61,852,895  | 6 | 0 | 6 | 1 |
| Case 16 | 7 | 61,994,170  | 73,673,643  | 3 | 2 | 5 | 0 |
| Case 16 | 7 | 73,695,848  | 73,901,739  | 7 | 0 | 7 | 1 |
| Case 16 | 7 | 73,907,973  | 78,463,648  | 3 | 2 | 5 | 0 |
| Case 16 | 7 | 78,467,217  | 84,089,388  | 7 | 0 | 7 | 1 |
| Case 16 | 7 | 84,098,378  | 84,098,378  | 2 | 2 | 4 | 0 |
| Case 16 | 7 | 84,101,774  | 85,573,660  | 5 | 2 | 7 | 0 |
| Case 16 | 7 | 85,574,619  | 88,301,914  | 7 | 0 | 7 | 1 |
| Case 16 | 7 | 88,302,772  | 88,302,772  | 2 | 2 | 4 | 0 |
| Case 16 | 7 | 88,302,926  | 92,989,228  | 6 | 1 | 7 | 0 |
| Case 16 | 7 | 92,991,487  | 92,991,487  | 2 | 2 | 4 | 0 |
| Case 16 | 7 | 92,991,879  | 94,294,371  | 7 | 0 | 7 | 1 |
| Case 16 | 7 | 94,294,682  | 94,296,769  | 2 | 2 | 4 | 0 |



|         |    |             |             |   |   |   |   |
|---------|----|-------------|-------------|---|---|---|---|
| Case 16 | 7  | 94,296,793  | 95,813,688  | 6 | 1 | 7 | 0 |
| Case 16 | 7  | 95,817,231  | 99,630,948  | 7 | 0 | 7 | 1 |
| Case 16 | 7  | 99,631,342  | 100,674,467 | 3 | 0 | 3 | 1 |
| Case 16 | 7  | 100,674,899 | 100,685,355 | 2 | 0 | 2 | 1 |
| Case 16 | 7  | 100,685,397 | 157,480,939 | 3 | 0 | 3 | 1 |
| Case 16 | 7  | 157,485,165 | 157,485,165 | 2 | 0 | 2 | 1 |
| Case 16 | 7  | 157,487,013 | 157,600,780 | 1 | 0 | 1 | 0 |
| Case 16 | 7  | 157,605,468 | 157,605,815 | 2 | 0 | 2 | 1 |
| Case 16 | 7  | 157,625,051 | 159,119,486 | 3 | 0 | 3 | 1 |
| Case 16 | 8  | 164,984     | 6,469,440   | 1 | 1 | 2 | 0 |
| Case 16 | 8  | 6,469,600   | 6,742,558   | 2 | 1 | 3 | 0 |
| Case 16 | 8  | 6,743,029   | 10,605,234  | 1 | 1 | 2 | 0 |
| Case 16 | 8  | 10,611,882  | 11,617,505  | 2 | 1 | 3 | 0 |
| Case 16 | 8  | 11,618,107  | 12,626,394  | 1 | 1 | 2 | 0 |
| Case 16 | 8  | 12,627,878  | 12,869,185  | 2 | 1 | 3 | 0 |
| Case 16 | 8  | 12,870,160  | 17,176,644  | 1 | 1 | 2 | 0 |
| Case 16 | 8  | 17,177,934  | 17,554,774  | 2 | 1 | 3 | 0 |
| Case 16 | 8  | 17,554,847  | 18,725,558  | 1 | 1 | 2 | 0 |
| Case 16 | 8  | 18,728,941  | 18,790,724  | 2 | 1 | 3 | 0 |
| Case 16 | 8  | 18,791,682  | 20,112,418  | 1 | 1 | 2 | 0 |
| Case 16 | 8  | 20,112,587  | 21,977,305  | 2 | 1 | 3 | 0 |
| Case 16 | 8  | 21,977,860  | 22,954,194  | 1 | 1 | 2 | 0 |
| Case 16 | 8  | 22,957,606  | 23,797,763  | 2 | 1 | 3 | 0 |
| Case 16 | 8  | 23,828,175  | 24,176,278  | 1 | 1 | 2 | 0 |
| Case 16 | 8  | 24,178,738  | 25,323,241  | 2 | 1 | 3 | 0 |
| Case 16 | 8  | 25,323,772  | 25,801,335  | 1 | 1 | 2 | 0 |
| Case 16 | 8  | 25,805,224  | 26,021,965  | 2 | 1 | 3 | 0 |
| Case 16 | 8  | 26,023,906  | 26,440,229  | 1 | 1 | 2 | 0 |
| Case 16 | 8  | 26,441,275  | 26,623,647  | 2 | 1 | 3 | 0 |
| Case 16 | 8  | 26,623,868  | 27,039,100  | 1 | 1 | 2 | 0 |
| Case 16 | 8  | 27,040,155  | 27,402,494  | 2 | 1 | 3 | 0 |
| Case 16 | 8  | 27,402,664  | 27,711,673  | 1 | 1 | 2 | 0 |
| Case 16 | 8  | 27,715,116  | 28,076,422  | 2 | 1 | 3 | 0 |
| Case 16 | 8  | 28,084,323  | 29,616,242  | 1 | 1 | 2 | 0 |
| Case 16 | 8  | 29,619,600  | 30,146,429  | 2 | 1 | 3 | 0 |
| Case 16 | 8  | 30,149,262  | 36,908,104  | 1 | 1 | 2 | 0 |
| Case 16 | 8  | 36,911,307  | 38,678,000  | 2 | 1 | 3 | 0 |
| Case 16 | 8  | 38,684,695  | 41,573,488  | 1 | 1 | 2 | 0 |
| Case 16 | 8  | 41,574,488  | 42,178,280  | 2 | 1 | 3 | 0 |
| Case 16 | 8  | 42,178,334  | 43,791,691  | 1 | 1 | 2 | 0 |
| Case 16 | 8  | 46,886,735  | 69,837,546  | 1 | 1 | 2 | 0 |
| Case 16 | 8  | 69,838,267  | 133,337,663 | 2 | 1 | 3 | 0 |
| Case 16 | 8  | 133,339,397 | 133,482,177 | 2 | 2 | 4 | 0 |
| Case 16 | 8  | 133,482,984 | 146,293,414 | 2 | 1 | 3 | 0 |
| Case 16 | 9  | 46,587      | 20,986,362  | 1 | 1 | 2 | 0 |
| Case 16 | 9  | 20,986,463  | 20,988,418  | 0 | 0 | 0 | 0 |
| Case 16 | 9  | 20,988,423  | 20,990,164  | 1 | 0 | 1 | 0 |
| Case 16 | 9  | 20,990,180  | 20,990,242  | 0 | 0 | 0 | 0 |
| Case 16 | 9  | 20,990,364  | 21,166,270  | 1 | 0 | 1 | 0 |
| Case 16 | 9  | 21,170,595  | 23,829,728  | 0 | 0 | 0 | 0 |
| Case 16 | 9  | 23,829,824  | 31,938,495  | 1 | 0 | 1 | 0 |
| Case 16 | 9  | 31,951,536  | 34,557,313  | 2 | 0 | 2 | 1 |
| Case 16 | 9  | 34,557,610  | 34,972,352  | 3 | 0 | 3 | 1 |
| Case 16 | 9  | 34,972,443  | 38,636,463  | 2 | 0 | 2 | 1 |
| Case 16 | 9  | 38,639,318  | 38,741,712  | 3 | 0 | 3 | 1 |
| Case 16 | 9  | 38,742,787  | 43,581,253  | 2 | 0 | 2 | 1 |
| Case 16 | 9  | 43,627,237  | 46,944,322  | 3 | 0 | 3 | 1 |
| Case 16 | 9  | 65,629,772  | 140,205,159 | 3 | 0 | 3 | 1 |
| Case 16 | 9  | 140,205,269 | 140,247,365 | 2 | 0 | 2 | 1 |
| Case 16 | 9  | 140,248,802 | 141,066,491 | 3 | 0 | 3 | 1 |
| Case 16 | 10 | 98,087      | 1,576,292   | 1 | 0 | 1 | 0 |

|         |    |             |             |   |   |   |   |
|---------|----|-------------|-------------|---|---|---|---|
| Case 16 | 10 | 1,576,738   | 1,727,178   | 2 | 0 | 2 | 1 |
| Case 16 | 10 | 1,728,840   | 3,095,281   | 1 | 0 | 1 | 0 |
| Case 16 | 10 | 3,096,702   | 3,207,632   | 2 | 0 | 2 | 1 |
| Case 16 | 10 | 3,208,512   | 5,435,827   | 1 | 0 | 1 | 0 |
| Case 16 | 10 | 5,435,918   | 5,794,475   | 2 | 0 | 2 | 1 |
| Case 16 | 10 | 5,799,613   | 6,035,149   | 1 | 0 | 1 | 0 |
| Case 16 | 10 | 6,036,144   | 6,220,388   | 2 | 0 | 2 | 1 |
| Case 16 | 10 | 6,220,725   | 6,402,741   | 1 | 0 | 1 | 0 |
| Case 16 | 10 | 6,405,507   | 6,520,963   | 2 | 0 | 2 | 1 |
| Case 16 | 10 | 6,522,506   | 7,084,300   | 1 | 0 | 1 | 0 |
| Case 16 | 10 | 7,084,468   | 7,265,468   | 2 | 0 | 2 | 1 |
| Case 16 | 10 | 7,266,521   | 12,211,970  | 1 | 0 | 1 | 0 |
| Case 16 | 10 | 12,214,844  | 12,307,963  | 2 | 0 | 2 | 1 |
| Case 16 | 10 | 12,310,737  | 12,758,991  | 1 | 0 | 1 | 0 |
| Case 16 | 10 | 12,762,303  | 12,938,961  | 2 | 0 | 2 | 1 |
| Case 16 | 10 | 12,939,124  | 14,029,701  | 1 | 0 | 1 | 0 |
| Case 16 | 10 | 14,029,742  | 14,202,285  | 2 | 0 | 2 | 1 |
| Case 16 | 10 | 14,208,510  | 14,563,299  | 1 | 0 | 1 | 0 |
| Case 16 | 10 | 14,563,960  | 14,734,972  | 2 | 0 | 2 | 1 |
| Case 16 | 10 | 14,736,077  | 16,932,384  | 1 | 0 | 1 | 0 |
| Case 16 | 10 | 16,932,424  | 16,975,190  | 2 | 0 | 2 | 1 |
| Case 16 | 10 | 16,976,226  | 24,595,755  | 1 | 0 | 1 | 0 |
| Case 16 | 10 | 24,595,889  | 24,908,437  | 2 | 0 | 2 | 1 |
| Case 16 | 10 | 24,908,614  | 29,258,268  | 1 | 0 | 1 | 0 |
| Case 16 | 10 | 29,259,450  | 29,428,085  | 2 | 0 | 2 | 1 |
| Case 16 | 10 | 29,428,123  | 30,274,368  | 1 | 0 | 1 | 0 |
| Case 16 | 10 | 30,278,236  | 30,560,230  | 2 | 0 | 2 | 1 |
| Case 16 | 10 | 30,570,045  | 38,501,841  | 1 | 0 | 1 | 0 |
| Case 16 | 10 | 38,502,333  | 39,097,912  | 2 | 0 | 2 | 1 |
| Case 16 | 10 | 42,436,301  | 47,000,019  | 2 | 0 | 2 | 1 |
| Case 16 | 10 | 47,000,252  | 47,412,588  | 2 | 1 | 3 | 0 |
| Case 16 | 10 | 47,543,322  | 47,650,490  | 4 | 1 | 5 | 0 |
| Case 16 | 10 | 47,660,466  | 68,457,813  | 2 | 0 | 2 | 1 |
| Case 16 | 10 | 68,461,866  | 68,587,558  | 1 | 0 | 1 | 0 |
| Case 16 | 10 | 68,593,916  | 68,645,433  | 2 | 0 | 2 | 1 |
| Case 16 | 10 | 68,648,238  | 68,736,018  | 1 | 1 | 2 | 0 |
| Case 16 | 10 | 68,741,681  | 68,978,867  | 0 | 0 | 0 | 0 |
| Case 16 | 10 | 68,979,376  | 69,042,380  | 1 | 0 | 1 | 0 |
| Case 16 | 10 | 69,050,705  | 78,768,629  | 2 | 0 | 2 | 1 |
| Case 16 | 10 | 78,770,196  | 79,578,292  | 3 | 0 | 3 | 1 |
| Case 16 | 10 | 79,579,047  | 79,795,580  | 2 | 0 | 2 | 1 |
| Case 16 | 10 | 79,799,959  | 80,066,149  | 3 | 0 | 3 | 1 |
| Case 16 | 10 | 80,073,376  | 80,752,765  | 2 | 0 | 2 | 1 |
| Case 16 | 10 | 80,756,541  | 80,932,607  | 3 | 0 | 3 | 1 |
| Case 16 | 10 | 80,932,877  | 95,046,048  | 2 | 0 | 2 | 1 |
| Case 16 | 10 | 95,046,375  | 95,148,835  | 3 | 0 | 3 | 1 |
| Case 16 | 10 | 95,148,875  | 102,056,784 | 2 | 0 | 2 | 1 |
| Case 16 | 10 | 102,056,790 | 102,647,686 | 3 | 0 | 3 | 1 |
| Case 16 | 10 | 102,648,765 | 107,870,474 | 2 | 0 | 2 | 1 |
| Case 16 | 10 | 107,873,989 | 109,458,854 | 3 | 0 | 3 | 1 |
| Case 16 | 10 | 109,459,645 | 126,182,752 | 2 | 0 | 2 | 1 |
| Case 16 | 10 | 126,184,988 | 126,230,878 | 3 | 0 | 3 | 1 |
| Case 16 | 10 | 126,235,677 | 135,234,580 | 2 | 0 | 2 | 1 |
| Case 16 | 10 | 135,235,890 | 135,400,457 | 4 | 0 | 4 | 1 |
| Case 16 | 10 | 135,402,200 | 135,477,883 | 2 | 0 | 2 | 1 |
| Case 16 | 11 | 193,146     | 1,015,786   | 1 | 1 | 2 | 0 |
| Case 16 | 11 | 1,015,828   | 1,026,001   | 2 | 1 | 3 | 0 |
| Case 16 | 11 | 1,026,400   | 4,613,366   | 1 | 1 | 2 | 0 |
| Case 16 | 11 | 4,615,767   | 5,021,055   | 2 | 1 | 3 | 0 |
| Case 16 | 11 | 5,021,116   | 5,474,093   | 1 | 1 | 2 | 0 |
| Case 16 | 11 | 5,474,350   | 5,566,584   | 2 | 1 | 3 | 0 |

|         |    |             |             |   |   |   |   |
|---------|----|-------------|-------------|---|---|---|---|
| Case 16 | 11 | 5,566,590   | 6,220,820   | 1 | 1 | 2 | 0 |
| Case 16 | 11 | 6,221,169   | 6,327,406   | 2 | 1 | 3 | 0 |
| Case 16 | 11 | 6,332,242   | 6,413,014   | 1 | 1 | 2 | 0 |
| Case 16 | 11 | 6,413,167   | 6,942,915   | 2 | 1 | 3 | 0 |
| Case 16 | 11 | 6,943,130   | 12,080,552  | 1 | 1 | 2 | 0 |
| Case 16 | 11 | 12,082,627  | 12,289,881  | 2 | 1 | 3 | 0 |
| Case 16 | 11 | 12,290,812  | 35,006,222  | 1 | 1 | 2 | 0 |
| Case 16 | 11 | 35,006,520  | 35,238,024  | 2 | 1 | 3 | 0 |
| Case 16 | 11 | 35,238,459  | 36,111,616  | 1 | 1 | 2 | 0 |
| Case 16 | 11 | 36,111,766  | 36,469,758  | 2 | 1 | 3 | 0 |
| Case 16 | 11 | 36,470,815  | 48,161,067  | 1 | 1 | 2 | 0 |
| Case 16 | 11 | 48,162,305  | 48,346,535  | 2 | 1 | 3 | 0 |
| Case 16 | 11 | 48,346,541  | 51,591,253  | 1 | 1 | 2 | 0 |
| Case 16 | 11 | 54,794,237  | 56,185,315  | 1 | 1 | 2 | 0 |
| Case 16 | 11 | 56,185,341  | 56,468,528  | 2 | 1 | 3 | 0 |
| Case 16 | 11 | 56,468,681  | 59,210,646  | 1 | 1 | 2 | 0 |
| Case 16 | 11 | 59,210,726  | 59,254,395  | 2 | 1 | 3 | 0 |
| Case 16 | 11 | 59,256,054  | 65,637,693  | 1 | 1 | 2 | 0 |
| Case 16 | 11 | 65,637,703  | 65,656,282  | 2 | 1 | 3 | 0 |
| Case 16 | 11 | 65,656,564  | 76,885,826  | 1 | 1 | 2 | 0 |
| Case 16 | 11 | 76,885,871  | 77,069,746  | 2 | 1 | 3 | 0 |
| Case 16 | 11 | 77,070,037  | 92,056,136  | 1 | 1 | 2 | 0 |
| Case 16 | 11 | 92,071,856  | 92,590,448  | 2 | 1 | 3 | 0 |
| Case 16 | 11 | 92,594,957  | 116,728,743 | 1 | 1 | 2 | 0 |
| Case 16 | 11 | 116,728,889 | 117,102,648 | 2 | 1 | 3 | 0 |
| Case 16 | 11 | 117,105,004 | 119,181,151 | 1 | 1 | 2 | 0 |
| Case 16 | 11 | 119,181,170 | 119,808,956 | 2 | 1 | 3 | 0 |
| Case 16 | 11 | 119,816,512 | 126,060,666 | 1 | 1 | 2 | 0 |
| Case 16 | 11 | 126,060,763 | 126,343,310 | 2 | 1 | 3 | 0 |
| Case 16 | 11 | 126,346,426 | 134,934,063 | 1 | 1 | 2 | 0 |
| Case 16 | 12 | 191,619     | 11,150,448  | 2 | 2 | 4 | 0 |
| Case 16 | 12 | 11,151,599  | 11,272,192  | 2 | 1 | 3 | 0 |
| Case 16 | 12 | 11,279,503  | 34,853,011  | 2 | 2 | 4 | 0 |
| Case 16 | 12 | 37,876,400  | 38,124,847  | 2 | 2 | 4 | 0 |
| Case 16 | 12 | 38,132,172  | 41,195,135  | 4 | 1 | 5 | 0 |
| Case 16 | 12 | 41,196,230  | 47,403,015  | 3 | 2 | 5 | 0 |
| Case 16 | 12 | 47,408,291  | 47,486,147  | 4 | 1 | 5 | 0 |
| Case 16 | 12 | 47,486,382  | 51,240,678  | 3 | 1 | 4 | 0 |
| Case 16 | 12 | 51,243,077  | 51,386,184  | 4 | 1 | 5 | 0 |
| Case 16 | 12 | 51,389,509  | 55,055,400  | 3 | 1 | 4 | 0 |
| Case 16 | 12 | 55,060,664  | 55,354,987  | 4 | 1 | 5 | 0 |
| Case 16 | 12 | 55,355,015  | 55,673,008  | 3 | 1 | 4 | 0 |
| Case 16 | 12 | 55,677,756  | 56,022,869  | 4 | 1 | 5 | 0 |
| Case 16 | 12 | 56,025,054  | 58,225,904  | 3 | 1 | 4 | 0 |
| Case 16 | 12 | 58,229,377  | 58,328,500  | 5 | 0 | 5 | 1 |
| Case 16 | 12 | 58,329,820  | 79,432,941  | 3 | 2 | 5 | 0 |
| Case 16 | 12 | 79,441,371  | 79,441,371  | 7 | 0 | 7 | 1 |
| Case 16 | 12 | 79,444,707  | 79,444,707  | 3 | 2 | 5 | 0 |
| Case 16 | 12 | 79,449,407  | 79,449,407  | 2 | 2 | 4 | 0 |
| Case 16 | 12 | 79,454,982  | 79,454,982  | 3 | 2 | 5 | 0 |
| Case 16 | 12 | 79,464,069  | 80,665,460  | 4 | 1 | 5 | 0 |
| Case 16 | 12 | 80,665,473  | 81,031,541  | 5 | 1 | 6 | 0 |
| Case 16 | 12 | 81,035,063  | 85,372,417  | 4 | 1 | 5 | 0 |
| Case 16 | 12 | 85,377,870  | 133,810,935 | 2 | 2 | 4 | 0 |
| Case 16 | 13 | 19,058,717  | 19,771,535  | 2 | 0 | 2 | 1 |
| Case 16 | 13 | 19,774,848  | 73,636,590  | 2 | 1 | 3 | 0 |
| Case 16 | 13 | 73,636,621  | 73,636,871  | 2 | 2 | 4 | 0 |
| Case 16 | 13 | 73,641,750  | 73,676,673  | 7 | 0 | 7 | 1 |
| Case 16 | 13 | 73,680,818  | 73,703,305  | 2 | 2 | 4 | 0 |
| Case 16 | 13 | 73,712,365  | 115,103,529 | 2 | 1 | 3 | 0 |
| Case 16 | 14 | 19,280,733  | 20,344,854  | 2 | 2 | 4 | 0 |

|         |    |             |             |   |   |   |   |
|---------|----|-------------|-------------|---|---|---|---|
| Case 16 | 14 | 20,345,031  | 20,425,051  | 4 | 1 | 5 | 0 |
| Case 16 | 14 | 20,426,742  | 22,590,877  | 2 | 1 | 3 | 0 |
| Case 16 | 14 | 22,590,996  | 22,957,488  | 3 | 1 | 4 | 0 |
| Case 16 | 14 | 22,957,900  | 41,860,852  | 2 | 1 | 3 | 0 |
| Case 16 | 14 | 41,870,230  | 42,877,636  | 1 | 1 | 2 | 0 |
| Case 16 | 14 | 42,881,888  | 43,103,820  | 2 | 1 | 3 | 0 |
| Case 16 | 14 | 43,108,456  | 44,261,060  | 1 | 1 | 2 | 0 |
| Case 16 | 14 | 44,261,673  | 107,287,663 | 2 | 1 | 3 | 0 |
| Case 16 | 15 | 20,034,919  | 21,903,815  | 2 | 2 | 4 | 0 |
| Case 16 | 15 | 21,904,331  | 22,427,966  | 4 | 1 | 5 | 0 |
| Case 16 | 15 | 22,652,330  | 43,572,032  | 2 | 1 | 3 | 0 |
| Case 16 | 15 | 43,572,110  | 43,769,931  | 2 | 0 | 2 | 1 |
| Case 16 | 15 | 43,771,694  | 54,527,299  | 2 | 1 | 3 | 0 |
| Case 16 | 15 | 54,529,770  | 54,745,309  | 1 | 1 | 2 | 0 |
| Case 16 | 15 | 54,753,968  | 81,888,336  | 2 | 1 | 3 | 0 |
| Case 16 | 15 | 81,889,290  | 87,635,058  | 2 | 2 | 4 | 0 |
| Case 16 | 15 | 87,636,301  | 88,519,216  | 4 | 1 | 5 | 0 |
| Case 16 | 15 | 88,520,291  | 90,548,305  | 3 | 1 | 4 | 0 |
| Case 16 | 15 | 90,551,003  | 92,548,505  | 4 | 1 | 5 | 0 |
| Case 16 | 15 | 92,549,465  | 94,193,200  | 2 | 2 | 4 | 0 |
| Case 16 | 15 | 94,194,564  | 99,194,896  | 4 | 1 | 5 | 0 |
| Case 16 | 15 | 99,196,112  | 100,053,126 | 3 | 1 | 4 | 0 |
| Case 16 | 15 | 100,067,546 | 100,533,063 | 4 | 1 | 5 | 0 |
| Case 16 | 15 | 100,533,254 | 100,937,762 | 3 | 1 | 4 | 0 |
| Case 16 | 15 | 100,942,373 | 101,421,872 | 4 | 1 | 5 | 0 |
| Case 16 | 15 | 101,422,571 | 102,006,485 | 3 | 1 | 4 | 0 |
| Case 16 | 15 | 102,008,648 | 102,461,162 | 4 | 1 | 5 | 0 |
| Case 16 | 16 | 88,165      | 362,638     | 2 | 2 | 4 | 0 |
| Case 16 | 16 | 364,544     | 1,827,180   | 2 | 1 | 3 | 0 |
| Case 16 | 16 | 1,827,258   | 1,962,123   | 2 | 2 | 4 | 0 |
| Case 16 | 16 | 1,962,132   | 3,117,577   | 2 | 1 | 3 | 0 |
| Case 16 | 16 | 3,117,607   | 3,299,759   | 2 | 2 | 4 | 0 |
| Case 16 | 16 | 3,301,360   | 3,860,674   | 2 | 1 | 3 | 0 |
| Case 16 | 16 | 3,860,684   | 4,163,779   | 2 | 0 | 2 | 1 |
| Case 16 | 16 | 4,164,738   | 4,171,701   | 2 | 1 | 3 | 0 |
| Case 16 | 16 | 4,180,337   | 4,307,646   | 2 | 2 | 4 | 0 |
| Case 16 | 16 | 4,310,231   | 4,819,496   | 2 | 1 | 3 | 0 |
| Case 16 | 16 | 4,821,698   | 4,933,624   | 2 | 2 | 4 | 0 |
| Case 16 | 16 | 4,933,690   | 5,225,829   | 2 | 1 | 3 | 0 |
| Case 16 | 16 | 5,226,917   | 28,323,470  | 2 | 2 | 4 | 0 |
| Case 16 | 16 | 28,325,940  | 32,910,521  | 2 | 1 | 3 | 0 |
| Case 16 | 16 | 32,941,309  | 35,285,582  | 2 | 0 | 2 | 1 |
| Case 16 | 16 | 46,450,037  | 47,699,855  | 2 | 0 | 2 | 1 |
| Case 16 | 16 | 47,703,157  | 48,266,831  | 3 | 0 | 3 | 1 |
| Case 16 | 16 | 48,268,318  | 48,846,170  | 2 | 0 | 2 | 1 |
| Case 16 | 16 | 48,851,380  | 49,913,220  | 3 | 0 | 3 | 1 |
| Case 16 | 16 | 49,914,323  | 51,491,825  | 2 | 0 | 2 | 1 |
| Case 16 | 16 | 51,494,189  | 52,946,137  | 3 | 0 | 3 | 1 |
| Case 16 | 16 | 52,946,814  | 53,777,020  | 2 | 0 | 2 | 1 |
| Case 16 | 16 | 53,780,102  | 56,389,690  | 3 | 0 | 3 | 1 |
| Case 16 | 16 | 56,394,035  | 56,686,970  | 2 | 0 | 2 | 1 |
| Case 16 | 16 | 56,687,048  | 57,761,286  | 3 | 0 | 3 | 1 |
| Case 16 | 16 | 57,761,311  | 57,869,092  | 2 | 0 | 2 | 1 |
| Case 16 | 16 | 57,877,640  | 59,421,321  | 3 | 0 | 3 | 1 |
| Case 16 | 16 | 59,426,914  | 64,216,776  | 2 | 0 | 2 | 1 |
| Case 16 | 16 | 64,221,018  | 66,977,896  | 3 | 0 | 3 | 1 |
| Case 16 | 16 | 66,977,979  | 67,919,730  | 2 | 0 | 2 | 1 |
| Case 16 | 16 | 67,919,906  | 68,359,280  | 3 | 0 | 3 | 1 |
| Case 16 | 16 | 68,373,384  | 68,393,405  | 2 | 0 | 2 | 1 |
| Case 16 | 16 | 68,395,161  | 68,803,222  | 1 | 0 | 1 | 0 |
| Case 16 | 16 | 68,810,923  | 69,007,951  | 2 | 0 | 2 | 1 |

|         |    |            |            |   |   |   |   |
|---------|----|------------|------------|---|---|---|---|
| Case 16 | 16 | 69,008,037 | 70,303,580 | 3 | 0 | 3 | 1 |
| Case 16 | 16 | 70,303,659 | 70,721,883 | 2 | 0 | 2 | 1 |
| Case 16 | 16 | 70,722,940 | 71,278,689 | 3 | 0 | 3 | 1 |
| Case 16 | 16 | 71,283,500 | 72,055,097 | 2 | 0 | 2 | 1 |
| Case 16 | 16 | 72,055,187 | 73,392,951 | 3 | 0 | 3 | 1 |
| Case 16 | 16 | 73,393,321 | 73,725,220 | 2 | 0 | 2 | 1 |
| Case 16 | 16 | 73,725,652 | 74,062,203 | 3 | 0 | 3 | 1 |
| Case 16 | 16 | 74,063,280 | 75,269,325 | 2 | 0 | 2 | 1 |
| Case 16 | 16 | 75,269,441 | 75,663,382 | 3 | 0 | 3 | 1 |
| Case 16 | 16 | 75,663,416 | 76,713,351 | 2 | 0 | 2 | 1 |
| Case 16 | 16 | 76,735,249 | 77,261,152 | 3 | 0 | 3 | 1 |
| Case 16 | 16 | 77,262,358 | 77,398,263 | 2 | 0 | 2 | 1 |
| Case 16 | 16 | 77,400,082 | 78,056,974 | 3 | 0 | 3 | 1 |
| Case 16 | 16 | 78,062,029 | 78,663,258 | 2 | 0 | 2 | 1 |
| Case 16 | 16 | 78,665,808 | 80,964,406 | 3 | 0 | 3 | 1 |
| Case 16 | 16 | 80,969,674 | 81,097,362 | 2 | 0 | 2 | 1 |
| Case 16 | 16 | 81,097,373 | 82,034,430 | 3 | 0 | 3 | 1 |
| Case 16 | 16 | 82,034,435 | 82,209,217 | 2 | 0 | 2 | 1 |
| Case 16 | 16 | 82,213,799 | 83,435,942 | 3 | 0 | 3 | 1 |
| Case 16 | 16 | 83,439,436 | 83,664,582 | 2 | 0 | 2 | 1 |
| Case 16 | 16 | 83,664,642 | 83,755,481 | 3 | 0 | 3 | 1 |
| Case 16 | 16 | 83,756,017 | 84,231,114 | 2 | 0 | 2 | 1 |
| Case 16 | 16 | 84,231,433 | 84,479,267 | 3 | 0 | 3 | 1 |
| Case 16 | 16 | 84,479,407 | 84,525,813 | 2 | 0 | 2 | 1 |
| Case 16 | 16 | 84,527,021 | 85,736,871 | 3 | 0 | 3 | 1 |
| Case 16 | 16 | 85,742,030 | 86,139,685 | 2 | 0 | 2 | 1 |
| Case 16 | 16 | 86,140,265 | 88,440,878 | 3 | 0 | 3 | 1 |
| Case 16 | 16 | 88,445,569 | 88,901,632 | 2 | 0 | 2 | 1 |
| Case 16 | 16 | 88,901,662 | 89,246,681 | 3 | 0 | 3 | 1 |
| Case 16 | 16 | 89,246,726 | 90,106,910 | 2 | 0 | 2 | 1 |
| Case 16 | 16 | 90,108,832 | 90,274,695 | 3 | 0 | 3 | 1 |
| Case 16 | 17 | 11,885     | 930,951    | 2 | 1 | 3 | 0 |
| Case 16 | 17 | 931,002    | 941,070    | 3 | 1 | 4 | 0 |
| Case 16 | 17 | 941,439    | 953,456    | 4 | 1 | 5 | 0 |
| Case 16 | 17 | 953,737    | 22,242,355 | 2 | 1 | 3 | 0 |
| Case 16 | 17 | 25,268,142 | 81,060,040 | 2 | 1 | 3 | 0 |
| Case 16 | 18 | 87,505     | 12,918,318 | 2 | 0 | 2 | 1 |
| Case 16 | 18 | 12,921,361 | 12,921,361 | 2 | 1 | 3 | 0 |
| Case 16 | 18 | 12,922,549 | 12,922,549 | 2 | 2 | 4 | 0 |
| Case 16 | 18 | 12,924,312 | 12,951,738 | 7 | 0 | 7 | 1 |
| Case 16 | 18 | 12,951,878 | 15,375,878 | 2 | 0 | 2 | 1 |
| Case 16 | 18 | 18,520,354 | 19,913,064 | 2 | 1 | 3 | 0 |
| Case 16 | 18 | 19,914,353 | 23,210,263 | 2 | 2 | 4 | 0 |
| Case 16 | 18 | 23,211,723 | 23,319,704 | 4 | 1 | 5 | 0 |
| Case 16 | 18 | 23,322,684 | 48,100,072 | 2 | 0 | 2 | 1 |
| Case 16 | 18 | 48,106,595 | 48,691,665 | 3 | 0 | 3 | 1 |
| Case 16 | 18 | 48,691,696 | 56,120,654 | 2 | 0 | 2 | 1 |
| Case 16 | 18 | 56,122,655 | 56,258,884 | 3 | 0 | 3 | 1 |
| Case 16 | 18 | 56,261,723 | 78,015,180 | 2 | 0 | 2 | 1 |
| Case 16 | 19 | 260,912    | 11,978,417 | 2 | 1 | 3 | 0 |
| Case 16 | 19 | 11,978,629 | 12,241,245 | 1 | 1 | 2 | 0 |
| Case 16 | 19 | 12,242,300 | 20,727,516 | 2 | 1 | 3 | 0 |
| Case 16 | 19 | 20,728,636 | 22,086,049 | 2 | 0 | 2 | 1 |
| Case 16 | 19 | 22,086,140 | 23,503,445 | 2 | 1 | 3 | 0 |
| Case 16 | 19 | 23,511,218 | 24,629,285 | 1 | 1 | 2 | 0 |
| Case 16 | 19 | 27,732,159 | 28,329,411 | 1 | 1 | 2 | 0 |
| Case 16 | 19 | 28,332,369 | 59,097,160 | 2 | 1 | 3 | 0 |
| Case 16 | 20 | 63,244     | 182,013    | 2 | 1 | 3 | 0 |
| Case 16 | 20 | 183,222    | 360,789    | 2 | 2 | 4 | 0 |
| Case 16 | 20 | 368,739    | 7,962,072  | 2 | 1 | 3 | 0 |
| Case 16 | 20 | 7,962,128  | 10,653,471 | 2 | 2 | 4 | 0 |

|         |    |             |             |   |   |   |   |
|---------|----|-------------|-------------|---|---|---|---|
| Case 16 | 20 | 10,653,603  | 11,100,677  | 2 | 1 | 3 | 0 |
| Case 16 | 20 | 11,107,386  | 14,436,938  | 2 | 2 | 4 | 0 |
| Case 16 | 20 | 14,455,497  | 14,526,164  | 2 | 1 | 3 | 0 |
| Case 16 | 20 | 14,530,220  | 14,840,502  | 2 | 0 | 2 | 1 |
| Case 16 | 20 | 14,842,386  | 14,842,386  | 2 | 1 | 3 | 0 |
| Case 16 | 20 | 14,847,907  | 26,293,985  | 2 | 2 | 4 | 0 |
| Case 16 | 20 | 29,425,357  | 34,054,019  | 2 | 2 | 4 | 0 |
| Case 16 | 20 | 34,054,790  | 34,568,384  | 2 | 1 | 3 | 0 |
| Case 16 | 20 | 34,568,423  | 41,831,299  | 2 | 2 | 4 | 0 |
| Case 16 | 20 | 41,832,049  | 42,143,218  | 2 | 1 | 3 | 0 |
| Case 16 | 20 | 42,143,266  | 51,741,616  | 2 | 2 | 4 | 0 |
| Case 16 | 20 | 51,744,157  | 52,654,547  | 7 | 0 | 7 | 1 |
| Case 16 | 20 | 52,660,741  | 52,944,580  | 2 | 2 | 4 | 0 |
| Case 16 | 20 | 52,948,117  | 53,387,775  | 7 | 0 | 7 | 1 |
| Case 16 | 20 | 53,393,214  | 53,936,950  | 3 | 2 | 5 | 0 |
| Case 16 | 20 | 53,939,607  | 54,813,533  | 7 | 0 | 7 | 1 |
| Case 16 | 20 | 54,817,822  | 55,816,734  | 2 | 2 | 4 | 0 |
| Case 16 | 20 | 55,824,475  | 55,830,151  | 4 | 1 | 5 | 0 |
| Case 16 | 20 | 55,871,840  | 56,577,581  | 5 | 1 | 6 | 0 |
| Case 16 | 20 | 56,579,137  | 56,579,137  | 2 | 2 | 4 | 0 |
| Case 16 | 20 | 56,582,331  | 61,453,946  | 7 | 0 | 7 | 1 |
| Case 16 | 20 | 61,458,135  | 62,948,788  | 2 | 0 | 2 | 1 |
| Case 16 | 21 | 10,827,533  | 10,971,337  | 2 | 1 | 3 | 0 |
| Case 16 | 21 | 14,368,320  | 35,281,496  | 2 | 1 | 3 | 0 |
| Case 16 | 21 | 35,284,683  | 35,386,385  | 2 | 0 | 2 | 1 |
| Case 16 | 21 | 35,390,852  | 36,171,613  | 2 | 1 | 3 | 0 |
| Case 16 | 21 | 36,172,283  | 36,241,929  | 2 | 0 | 2 | 1 |
| Case 16 | 21 | 36,245,198  | 36,459,698  | 1 | 0 | 1 | 0 |
| Case 16 | 21 | 36,461,659  | 36,461,659  | 2 | 0 | 2 | 1 |
| Case 16 | 21 | 36,462,734  | 48,100,155  | 2 | 1 | 3 | 0 |
| Case 16 | 22 | 16,114,244  | 51,195,728  | 2 | 0 | 2 | 1 |
| Case 25 | 1  | 82,154      | 1,179,365   | 2 | 1 | 3 | 0 |
| Case 25 | 1  | 1,179,619   | 1,288,823   | 1 | 1 | 2 | 0 |
| Case 25 | 1  | 1,289,446   | 1,478,153   | 2 | 1 | 3 | 0 |
| Case 25 | 1  | 1,479,333   | 1,712,230   | 1 | 1 | 2 | 0 |
| Case 25 | 1  | 1,715,011   | 3,407,007   | 2 | 1 | 3 | 0 |
| Case 25 | 1  | 3,407,112   | 3,440,718   | 1 | 1 | 2 | 0 |
| Case 25 | 1  | 3,440,753   | 40,462,662  | 2 | 1 | 3 | 0 |
| Case 25 | 1  | 40,499,302  | 41,399,738  | 2 | 2 | 4 | 0 |
| Case 25 | 1  | 41,402,143  | 50,676,278  | 2 | 1 | 3 | 0 |
| Case 25 | 1  | 50,679,059  | 51,092,829  | 2 | 2 | 4 | 0 |
| Case 25 | 1  | 51,118,253  | 64,329,485  | 2 | 1 | 3 | 0 |
| Case 25 | 1  | 64,339,801  | 64,647,608  | 2 | 2 | 4 | 0 |
| Case 25 | 1  | 64,656,538  | 85,016,112  | 2 | 1 | 3 | 0 |
| Case 25 | 1  | 85,016,177  | 85,035,778  | 1 | 1 | 2 | 0 |
| Case 25 | 1  | 85,036,315  | 92,647,223  | 2 | 1 | 3 | 0 |
| Case 25 | 1  | 92,647,250  | 94,574,780  | 2 | 2 | 4 | 0 |
| Case 25 | 1  | 94,575,043  | 114,606,912 | 2 | 1 | 3 | 0 |
| Case 25 | 1  | 114,616,228 | 114,682,286 | 2 | 2 | 4 | 0 |
| Case 25 | 1  | 114,682,407 | 115,675,957 | 2 | 1 | 3 | 0 |
| Case 25 | 1  | 115,676,278 | 115,846,221 | 3 | 1 | 4 | 0 |
| Case 25 | 1  | 115,847,295 | 118,757,034 | 2 | 1 | 3 | 0 |
| Case 25 | 1  | 118,757,864 | 121,346,616 | 2 | 2 | 4 | 0 |
| Case 25 | 1  | 142,649,718 | 144,889,465 | 2 | 2 | 4 | 0 |
| Case 25 | 1  | 144,894,611 | 149,201,987 | 4 | 1 | 5 | 0 |
| Case 25 | 1  | 149,660,940 | 151,510,825 | 3 | 1 | 4 | 0 |
| Case 25 | 1  | 151,511,268 | 153,640,827 | 4 | 1 | 5 | 0 |
| Case 25 | 1  | 153,642,909 | 154,626,705 | 3 | 1 | 4 | 0 |
| Case 25 | 1  | 154,630,498 | 154,766,100 | 4 | 1 | 5 | 0 |
| Case 25 | 1  | 154,766,495 | 157,067,666 | 3 | 1 | 4 | 0 |
| Case 25 | 1  | 157,067,672 | 161,014,727 | 4 | 1 | 5 | 0 |

|         |   |             |             |   |   |   |   |
|---------|---|-------------|-------------|---|---|---|---|
| Case 25 | 1 | 161,015,268 | 161,193,683 | 3 | 1 | 4 | 0 |
| Case 25 | 1 | 161,197,244 | 174,552,811 | 4 | 1 | 5 | 0 |
| Case 25 | 1 | 174,592,050 | 181,874,667 | 3 | 1 | 4 | 0 |
| Case 25 | 1 | 181,876,870 | 201,177,475 | 4 | 1 | 5 | 0 |
| Case 25 | 1 | 201,177,611 | 201,453,861 | 3 | 1 | 4 | 0 |
| Case 25 | 1 | 201,454,923 | 201,712,748 | 4 | 1 | 5 | 0 |
| Case 25 | 1 | 201,717,721 | 202,509,362 | 3 | 1 | 4 | 0 |
| Case 25 | 1 | 202,531,968 | 203,134,682 | 4 | 1 | 5 | 0 |
| Case 25 | 1 | 203,135,013 | 203,151,920 | 3 | 1 | 4 | 0 |
| Case 25 | 1 | 203,152,801 | 205,033,819 | 4 | 1 | 5 | 0 |
| Case 25 | 1 | 205,034,267 | 205,642,790 | 3 | 1 | 4 | 0 |
| Case 25 | 1 | 205,648,707 | 227,920,447 | 4 | 1 | 5 | 0 |
| Case 25 | 1 | 227,920,503 | 228,880,021 | 3 | 1 | 4 | 0 |
| Case 25 | 1 | 228,880,115 | 236,338,622 | 4 | 1 | 5 | 0 |
| Case 25 | 1 | 236,341,794 | 236,800,747 | 3 | 1 | 4 | 0 |
| Case 25 | 1 | 236,802,303 | 247,130,577 | 4 | 1 | 5 | 0 |
| Case 25 | 1 | 247,139,343 | 247,607,296 | 3 | 1 | 4 | 0 |
| Case 25 | 1 | 247,607,642 | 249,218,992 | 4 | 1 | 5 | 0 |
| Case 25 | 2 | 18,674      | 4,279,962   | 4 | 0 | 4 | 1 |
| Case 25 | 2 | 4,280,385   | 6,038,606   | 5 | 0 | 5 | 1 |
| Case 25 | 2 | 6,039,177   | 6,725,121   | 4 | 0 | 4 | 1 |
| Case 25 | 2 | 6,727,808   | 8,843,347   | 5 | 0 | 5 | 1 |
| Case 25 | 2 | 8,845,429   | 11,943,118  | 4 | 0 | 4 | 1 |
| Case 25 | 2 | 11,959,905  | 15,417,151  | 5 | 0 | 5 | 1 |
| Case 25 | 2 | 15,417,152  | 15,781,195  | 4 | 0 | 4 | 1 |
| Case 25 | 2 | 15,782,471  | 15,940,948  | 5 | 0 | 5 | 1 |
| Case 25 | 2 | 15,941,752  | 16,764,536  | 4 | 0 | 4 | 1 |
| Case 25 | 2 | 16,770,592  | 20,069,414  | 5 | 0 | 5 | 1 |
| Case 25 | 2 | 20,073,860  | 20,373,372  | 4 | 0 | 4 | 1 |
| Case 25 | 2 | 20,374,158  | 21,188,180  | 5 | 0 | 5 | 1 |
| Case 25 | 2 | 21,193,946  | 21,462,096  | 4 | 0 | 4 | 1 |
| Case 25 | 2 | 21,469,336  | 23,258,658  | 5 | 0 | 5 | 1 |
| Case 25 | 2 | 23,260,036  | 27,908,127  | 4 | 0 | 4 | 1 |
| Case 25 | 2 | 27,910,706  | 28,786,640  | 5 | 0 | 5 | 1 |
| Case 25 | 2 | 28,788,180  | 29,545,054  | 4 | 0 | 4 | 1 |
| Case 25 | 2 | 29,545,378  | 31,372,429  | 5 | 0 | 5 | 1 |
| Case 25 | 2 | 31,374,733  | 34,351,759  | 4 | 0 | 4 | 1 |
| Case 25 | 2 | 34,355,651  | 36,969,336  | 5 | 0 | 5 | 1 |
| Case 25 | 2 | 36,969,497  | 37,456,011  | 4 | 0 | 4 | 1 |
| Case 25 | 2 | 37,456,032  | 38,139,081  | 5 | 0 | 5 | 1 |
| Case 25 | 2 | 38,140,126  | 40,063,438  | 4 | 0 | 4 | 1 |
| Case 25 | 2 | 40,069,664  | 42,364,439  | 5 | 0 | 5 | 1 |
| Case 25 | 2 | 42,364,984  | 44,047,153  | 4 | 0 | 4 | 1 |
| Case 25 | 2 | 44,047,530  | 44,128,697  | 5 | 0 | 5 | 1 |
| Case 25 | 2 | 44,132,918  | 45,003,555  | 4 | 0 | 4 | 1 |
| Case 25 | 2 | 45,013,538  | 45,757,489  | 5 | 0 | 5 | 1 |
| Case 25 | 2 | 45,765,157  | 46,415,226  | 4 | 0 | 4 | 1 |
| Case 25 | 2 | 46,415,545  | 46,793,943  | 5 | 0 | 5 | 1 |
| Case 25 | 2 | 46,799,009  | 48,809,385  | 4 | 0 | 4 | 1 |
| Case 25 | 2 | 48,809,445  | 53,877,608  | 5 | 0 | 5 | 1 |
| Case 25 | 2 | 53,882,527  | 54,557,481  | 4 | 0 | 4 | 1 |
| Case 25 | 2 | 54,558,114  | 54,954,824  | 5 | 0 | 5 | 1 |
| Case 25 | 2 | 54,960,680  | 55,987,068  | 4 | 0 | 4 | 1 |
| Case 25 | 2 | 55,988,870  | 57,948,003  | 5 | 0 | 5 | 1 |
| Case 25 | 2 | 57,950,104  | 57,965,893  | 4 | 1 | 5 | 0 |
| Case 25 | 2 | 57,970,943  | 58,478,179  | 5 | 1 | 6 | 0 |
| Case 25 | 2 | 58,481,589  | 61,099,420  | 5 | 0 | 5 | 1 |
| Case 25 | 2 | 61,104,835  | 62,599,559  | 4 | 0 | 4 | 1 |
| Case 25 | 2 | 62,602,378  | 64,722,216  | 5 | 0 | 5 | 1 |
| Case 25 | 2 | 64,723,091  | 65,935,157  | 4 | 0 | 4 | 1 |
| Case 25 | 2 | 65,935,393  | 66,423,991  | 5 | 0 | 5 | 1 |

|         |   |             |             |   |   |   |   |
|---------|---|-------------|-------------|---|---|---|---|
| Case 25 | 2 | 66,430,063  | 87,046,014  | 3 | 0 | 3 | 1 |
| Case 25 | 2 | 87,048,630  | 92,081,640  | 4 | 0 | 4 | 1 |
| Case 25 | 2 | 95,429,424  | 95,455,258  | 4 | 1 | 5 | 0 |
| Case 25 | 2 | 95,485,567  | 96,777,168  | 5 | 1 | 6 | 0 |
| Case 25 | 2 | 96,780,082  | 97,268,597  | 4 | 1 | 5 | 0 |
| Case 25 | 2 | 97,269,598  | 97,577,661  | 5 | 0 | 5 | 1 |
| Case 25 | 2 | 97,578,329  | 105,532,887 | 4 | 2 | 6 | 0 |
| Case 25 | 2 | 105,540,676 | 111,392,259 | 3 | 2 | 5 | 0 |
| Case 25 | 2 | 111,395,603 | 114,730,384 | 3 | 1 | 4 | 0 |
| Case 25 | 2 | 114,739,110 | 118,474,016 | 4 | 1 | 5 | 0 |
| Case 25 | 2 | 118,477,333 | 120,281,735 | 3 | 1 | 4 | 0 |
| Case 25 | 2 | 120,285,695 | 121,197,733 | 4 | 1 | 5 | 0 |
| Case 25 | 2 | 121,202,152 | 122,544,461 | 3 | 1 | 4 | 0 |
| Case 25 | 2 | 122,547,210 | 126,513,548 | 4 | 1 | 5 | 0 |
| Case 25 | 2 | 126,520,538 | 131,484,635 | 3 | 1 | 4 | 0 |
| Case 25 | 2 | 131,486,169 | 131,895,230 | 3 | 0 | 3 | 1 |
| Case 25 | 2 | 131,896,476 | 145,585,009 | 4 | 0 | 4 | 1 |
| Case 25 | 2 | 145,588,358 | 151,756,935 | 4 | 1 | 5 | 0 |
| Case 25 | 2 | 151,760,808 | 153,129,366 | 3 | 1 | 4 | 0 |
| Case 25 | 2 | 153,141,491 | 153,466,691 | 4 | 1 | 5 | 0 |
| Case 25 | 2 | 153,468,112 | 154,510,972 | 3 | 1 | 4 | 0 |
| Case 25 | 2 | 154,512,950 | 159,575,554 | 4 | 1 | 5 | 0 |
| Case 25 | 2 | 159,577,307 | 160,322,656 | 3 | 1 | 4 | 0 |
| Case 25 | 2 | 160,323,691 | 167,235,607 | 4 | 1 | 5 | 0 |
| Case 25 | 2 | 167,242,799 | 168,099,787 | 3 | 1 | 4 | 0 |
| Case 25 | 2 | 168,099,796 | 168,514,672 | 4 | 1 | 5 | 0 |
| Case 25 | 2 | 168,515,362 | 168,671,309 | 3 | 1 | 4 | 0 |
| Case 25 | 2 | 168,671,408 | 170,273,127 | 4 | 1 | 5 | 0 |
| Case 25 | 2 | 170,278,948 | 170,865,808 | 3 | 1 | 4 | 0 |
| Case 25 | 2 | 170,866,411 | 173,280,280 | 4 | 1 | 5 | 0 |
| Case 25 | 2 | 173,287,607 | 174,267,281 | 3 | 1 | 4 | 0 |
| Case 25 | 2 | 174,267,348 | 174,931,752 | 4 | 1 | 5 | 0 |
| Case 25 | 2 | 174,931,957 | 176,044,863 | 3 | 1 | 4 | 0 |
| Case 25 | 2 | 176,046,090 | 176,750,331 | 4 | 1 | 5 | 0 |
| Case 25 | 2 | 176,752,831 | 177,536,629 | 3 | 1 | 4 | 0 |
| Case 25 | 2 | 177,541,263 | 178,193,780 | 4 | 1 | 5 | 0 |
| Case 25 | 2 | 178,196,885 | 178,545,566 | 3 | 1 | 4 | 0 |
| Case 25 | 2 | 178,545,736 | 179,453,945 | 4 | 1 | 5 | 0 |
| Case 25 | 2 | 179,454,020 | 180,149,795 | 3 | 1 | 4 | 0 |
| Case 25 | 2 | 180,150,435 | 186,661,602 | 4 | 1 | 5 | 0 |
| Case 25 | 2 | 186,664,825 | 186,817,136 | 2 | 1 | 3 | 0 |
| Case 25 | 2 | 186,844,579 | 196,260,290 | 4 | 1 | 5 | 0 |
| Case 25 | 2 | 196,260,762 | 198,498,595 | 3 | 1 | 4 | 0 |
| Case 25 | 2 | 198,508,951 | 201,313,305 | 4 | 1 | 5 | 0 |
| Case 25 | 2 | 201,313,988 | 201,440,070 | 3 | 1 | 4 | 0 |
| Case 25 | 2 | 201,440,089 | 201,691,502 | 4 | 1 | 5 | 0 |
| Case 25 | 2 | 201,692,776 | 202,672,651 | 3 | 1 | 4 | 0 |
| Case 25 | 2 | 202,673,058 | 202,964,528 | 4 | 1 | 5 | 0 |
| Case 25 | 2 | 202,969,687 | 204,571,441 | 3 | 1 | 4 | 0 |
| Case 25 | 2 | 204,571,459 | 206,046,172 | 4 | 1 | 5 | 0 |
| Case 25 | 2 | 206,048,814 | 206,236,189 | 3 | 1 | 4 | 0 |
| Case 25 | 2 | 206,236,440 | 206,627,009 | 4 | 1 | 5 | 0 |
| Case 25 | 2 | 206,627,473 | 208,115,178 | 3 | 1 | 4 | 0 |
| Case 25 | 2 | 208,116,942 | 208,391,978 | 4 | 1 | 5 | 0 |
| Case 25 | 2 | 208,393,998 | 211,954,880 | 4 | 0 | 4 | 1 |
| Case 25 | 2 | 211,960,740 | 212,196,304 | 3 | 0 | 3 | 1 |
| Case 25 | 2 | 212,199,994 | 219,229,762 | 4 | 0 | 4 | 1 |
| Case 25 | 2 | 219,229,842 | 219,544,658 | 3 | 0 | 3 | 1 |
| Case 25 | 2 | 219,544,733 | 221,607,036 | 4 | 0 | 4 | 1 |
| Case 25 | 2 | 221,632,617 | 222,111,919 | 5 | 0 | 5 | 1 |
| Case 25 | 2 | 222,119,829 | 224,036,595 | 4 | 0 | 4 | 1 |



|         |   |             |             |   |   |   |   |
|---------|---|-------------|-------------|---|---|---|---|
| Case 25 | 2 | 224,038,175 | 224,563,288 | 5 | 0 | 5 | 1 |
| Case 25 | 2 | 224,568,089 | 224,836,562 | 4 | 0 | 4 | 1 |
| Case 25 | 2 | 224,837,600 | 226,319,552 | 5 | 0 | 5 | 1 |
| Case 25 | 2 | 226,336,889 | 227,529,244 | 4 | 1 | 5 | 0 |
| Case 25 | 2 | 227,530,721 | 228,243,900 | 3 | 1 | 4 | 0 |
| Case 25 | 2 | 228,243,902 | 228,279,610 | 4 | 1 | 5 | 0 |
| Case 25 | 2 | 228,288,185 | 228,685,262 | 4 | 0 | 4 | 1 |
| Case 25 | 2 | 228,691,605 | 229,371,034 | 4 | 1 | 5 | 0 |
| Case 25 | 2 | 229,379,027 | 234,656,286 | 3 | 1 | 4 | 0 |
| Case 25 | 2 | 234,656,517 | 234,740,758 | 4 | 1 | 5 | 0 |
| Case 25 | 2 | 234,741,808 | 239,059,484 | 3 | 1 | 4 | 0 |
| Case 25 | 2 | 239,059,582 | 240,951,071 | 4 | 1 | 5 | 0 |
| Case 25 | 2 | 240,951,105 | 241,678,528 | 4 | 0 | 4 | 1 |
| Case 25 | 2 | 241,679,490 | 241,806,305 | 4 | 1 | 5 | 0 |
| Case 25 | 2 | 241,808,308 | 243,048,760 | 4 | 0 | 4 | 1 |
| Case 25 | 3 | 61,495      | 48,735,706  | 3 | 0 | 3 | 1 |
| Case 25 | 3 | 48,738,678  | 49,039,018  | 2 | 0 | 2 | 1 |
| Case 25 | 3 | 49,039,732  | 49,237,394  | 3 | 0 | 3 | 1 |
| Case 25 | 3 | 49,245,077  | 49,313,882  | 2 | 0 | 2 | 1 |
| Case 25 | 3 | 49,313,893  | 60,188,605  | 3 | 0 | 3 | 1 |
| Case 25 | 3 | 60,189,471  | 60,272,317  | 0 | 0 | 0 | 0 |
| Case 25 | 3 | 60,274,049  | 60,305,117  | 1 | 0 | 1 | 0 |
| Case 25 | 3 | 60,306,891  | 60,423,009  | 0 | 0 | 0 | 0 |
| Case 25 | 3 | 60,434,122  | 88,287,719  | 3 | 0 | 3 | 1 |
| Case 25 | 3 | 88,296,807  | 89,259,650  | 3 | 2 | 5 | 0 |
| Case 25 | 3 | 89,262,358  | 90,442,925  | 2 | 2 | 4 | 0 |
| Case 25 | 3 | 93,537,290  | 95,548,755  | 3 | 2 | 5 | 0 |
| Case 25 | 3 | 95,549,039  | 95,599,457  | 3 | 1 | 4 | 0 |
| Case 25 | 3 | 95,600,254  | 95,838,373  | 5 | 1 | 6 | 0 |
| Case 25 | 3 | 95,838,707  | 96,319,964  | 5 | 2 | 7 | 0 |
| Case 25 | 3 | 96,333,159  | 96,963,004  | 6 | 0 | 6 | 1 |
| Case 25 | 3 | 96,971,803  | 97,086,184  | 5 | 1 | 6 | 0 |
| Case 25 | 3 | 97,086,769  | 97,105,552  | 7 | 0 | 7 | 1 |
| Case 25 | 3 | 97,140,890  | 123,451,743 | 2 | 2 | 4 | 0 |
| Case 25 | 3 | 123,451,773 | 124,715,526 | 3 | 2 | 5 | 0 |
| Case 25 | 3 | 124,716,596 | 128,695,828 | 2 | 2 | 4 | 0 |
| Case 25 | 3 | 128,695,837 | 128,948,661 | 2 | 1 | 3 | 0 |
| Case 25 | 3 | 128,959,313 | 155,481,320 | 2 | 2 | 4 | 0 |
| Case 25 | 3 | 155,481,368 | 155,571,387 | 2 | 1 | 3 | 0 |
| Case 25 | 3 | 155,571,610 | 159,956,559 | 2 | 2 | 4 | 0 |
| Case 25 | 3 | 159,956,749 | 160,154,747 | 2 | 1 | 3 | 0 |
| Case 25 | 3 | 160,156,040 | 174,852,459 | 2 | 2 | 4 | 0 |
| Case 25 | 3 | 174,854,012 | 174,895,840 | 2 | 0 | 2 | 1 |
| Case 25 | 3 | 174,898,957 | 174,926,485 | 0 | 0 | 0 | 0 |
| Case 25 | 3 | 174,926,597 | 174,961,387 | 2 | 0 | 2 | 1 |
| Case 25 | 3 | 174,962,279 | 175,077,686 | 2 | 2 | 4 | 0 |
| Case 25 | 3 | 175,081,967 | 175,136,656 | 2 | 0 | 2 | 1 |
| Case 25 | 3 | 175,139,842 | 180,321,090 | 2 | 2 | 4 | 0 |
| Case 25 | 3 | 180,321,862 | 180,337,700 | 2 | 1 | 3 | 0 |
| Case 25 | 3 | 180,342,293 | 183,226,078 | 2 | 2 | 4 | 0 |
| Case 25 | 3 | 183,226,233 | 183,503,634 | 2 | 1 | 3 | 0 |
| Case 25 | 3 | 183,503,988 | 183,665,742 | 2 | 2 | 4 | 0 |
| Case 25 | 3 | 183,665,849 | 183,962,992 | 2 | 1 | 3 | 0 |
| Case 25 | 3 | 183,963,134 | 195,518,170 | 2 | 2 | 4 | 0 |
| Case 25 | 3 | 195,518,206 | 196,663,321 | 2 | 1 | 3 | 0 |
| Case 25 | 3 | 196,665,854 | 197,428,623 | 2 | 2 | 4 | 0 |
| Case 25 | 3 | 197,428,713 | 197,838,262 | 2 | 1 | 3 | 0 |
| Case 25 | 4 | 71,566      | 2,861,430   | 2 | 1 | 3 | 0 |
| Case 25 | 4 | 2,862,190   | 3,074,795   | 2 | 2 | 4 | 0 |
| Case 25 | 4 | 3,084,269   | 4,199,600   | 2 | 1 | 3 | 0 |
| Case 25 | 4 | 4,199,797   | 5,078,646   | 2 | 2 | 4 | 0 |

|         |   |             |             |   |   |   |   |
|---------|---|-------------|-------------|---|---|---|---|
| Case 25 | 4 | 5,078,789   | 8,228,894   | 2 | 1 | 3 | 0 |
| Case 25 | 4 | 8,228,979   | 8,238,057   | 1 | 1 | 2 | 0 |
| Case 25 | 4 | 8,238,090   | 21,566,178  | 2 | 1 | 3 | 0 |
| Case 25 | 4 | 21,566,484  | 25,125,783  | 3 | 1 | 4 | 0 |
| Case 25 | 4 | 25,127,309  | 49,620,898  | 2 | 1 | 3 | 0 |
| Case 25 | 4 | 52,697,856  | 113,508,884 | 2 | 1 | 3 | 0 |
| Case 25 | 4 | 113,511,629 | 113,622,050 | 1 | 1 | 2 | 0 |
| Case 25 | 4 | 113,637,288 | 117,527,892 | 2 | 1 | 3 | 0 |
| Case 25 | 4 | 117,540,588 | 117,613,353 | 0 | 0 | 0 | 0 |
| Case 25 | 4 | 117,618,126 | 117,618,126 | 2 | 0 | 2 | 1 |
| Case 25 | 4 | 117,623,903 | 121,021,737 | 2 | 1 | 3 | 0 |
| Case 25 | 4 | 121,033,187 | 128,651,914 | 2 | 2 | 4 | 0 |
| Case 25 | 4 | 128,655,836 | 129,214,377 | 2 | 1 | 3 | 0 |
| Case 25 | 4 | 129,217,267 | 132,051,076 | 2 | 2 | 4 | 0 |
| Case 25 | 4 | 132,052,397 | 132,298,239 | 2 | 1 | 3 | 0 |
| Case 25 | 4 | 132,305,574 | 145,633,146 | 2 | 2 | 4 | 0 |
| Case 25 | 4 | 145,633,530 | 146,002,881 | 2 | 0 | 2 | 1 |
| Case 25 | 4 | 146,017,185 | 148,555,511 | 2 | 2 | 4 | 0 |
| Case 25 | 4 | 148,559,136 | 148,822,403 | 2 | 1 | 3 | 0 |
| Case 25 | 4 | 148,822,783 | 165,700,679 | 2 | 2 | 4 | 0 |
| Case 25 | 4 | 165,707,728 | 166,024,181 | 2 | 1 | 3 | 0 |
| Case 25 | 4 | 166,024,258 | 171,576,294 | 2 | 2 | 4 | 0 |
| Case 25 | 4 | 171,579,204 | 172,999,916 | 3 | 2 | 5 | 0 |
| Case 25 | 4 | 173,001,831 | 173,035,260 | 3 | 1 | 4 | 0 |
| Case 25 | 4 | 173,040,504 | 173,543,874 | 5 | 1 | 6 | 0 |
| Case 25 | 4 | 173,562,564 | 173,646,842 | 4 | 1 | 5 | 0 |
| Case 25 | 4 | 173,653,680 | 174,392,507 | 3 | 2 | 5 | 0 |
| Case 25 | 4 | 174,398,324 | 174,459,823 | 3 | 0 | 3 | 1 |
| Case 25 | 4 | 174,461,343 | 175,880,491 | 2 | 0 | 2 | 1 |
| Case 25 | 4 | 175,890,127 | 175,954,666 | 3 | 0 | 3 | 1 |
| Case 25 | 4 | 175,964,181 | 183,661,673 | 2 | 0 | 2 | 1 |
| Case 25 | 4 | 183,662,527 | 183,792,885 | 3 | 0 | 3 | 1 |
| Case 25 | 4 | 183,793,275 | 184,241,281 | 2 | 0 | 2 | 1 |
| Case 25 | 4 | 184,242,959 | 184,335,306 | 3 | 0 | 3 | 1 |
| Case 25 | 4 | 184,338,589 | 184,902,533 | 2 | 0 | 2 | 1 |
| Case 25 | 4 | 184,905,482 | 185,165,607 | 3 | 0 | 3 | 1 |
| Case 25 | 4 | 185,170,812 | 185,263,811 | 2 | 0 | 2 | 1 |
| Case 25 | 4 | 185,265,401 | 185,400,748 | 3 | 0 | 3 | 1 |
| Case 25 | 4 | 185,406,285 | 185,801,346 | 2 | 0 | 2 | 1 |
| Case 25 | 4 | 185,801,567 | 185,940,205 | 3 | 0 | 3 | 1 |
| Case 25 | 4 | 185,940,785 | 186,537,232 | 2 | 0 | 2 | 1 |
| Case 25 | 4 | 186,540,503 | 186,644,607 | 3 | 0 | 3 | 1 |
| Case 25 | 4 | 186,648,646 | 187,201,219 | 2 | 0 | 2 | 1 |
| Case 25 | 4 | 187,201,412 | 187,210,620 | 3 | 0 | 3 | 1 |
| Case 25 | 4 | 187,212,134 | 187,403,169 | 2 | 0 | 2 | 1 |
| Case 25 | 4 | 187,404,608 | 187,525,560 | 3 | 0 | 3 | 1 |
| Case 25 | 4 | 187,525,592 | 187,538,942 | 2 | 0 | 2 | 1 |
| Case 25 | 4 | 187,539,125 | 187,542,434 | 3 | 0 | 3 | 1 |
| Case 25 | 4 | 187,542,755 | 187,621,281 | 2 | 0 | 2 | 1 |
| Case 25 | 4 | 187,621,568 | 187,722,479 | 3 | 0 | 3 | 1 |
| Case 25 | 4 | 187,724,314 | 190,872,778 | 2 | 0 | 2 | 1 |
| Case 25 | 4 | 190,876,192 | 190,963,766 | 3 | 0 | 3 | 1 |
| Case 25 | 5 | 38,139      | 3,815,297   | 4 | 1 | 5 | 0 |
| Case 25 | 5 | 3,815,679   | 6,279,339   | 5 | 1 | 6 | 0 |
| Case 25 | 5 | 6,281,648   | 6,622,017   | 4 | 1 | 5 | 0 |
| Case 25 | 5 | 6,623,085   | 11,737,875  | 5 | 1 | 6 | 0 |
| Case 25 | 5 | 11,742,668  | 13,604,919  | 5 | 2 | 7 | 0 |
| Case 25 | 5 | 13,604,996  | 16,584,227  | 5 | 1 | 6 | 0 |
| Case 25 | 5 | 16,585,183  | 17,469,290  | 4 | 1 | 5 | 0 |
| Case 25 | 5 | 17,477,812  | 17,738,703  | 5 | 1 | 6 | 0 |
| Case 25 | 5 | 17,739,449  | 18,816,719  | 5 | 2 | 7 | 0 |

|         |   |             |             |   |   |   |   |
|---------|---|-------------|-------------|---|---|---|---|
| Case 25 | 5 | 18,819,946  | 20,991,405  | 5 | 1 | 6 | 0 |
| Case 25 | 5 | 20,992,734  | 22,820,390  | 5 | 2 | 7 | 0 |
| Case 25 | 5 | 22,823,694  | 26,064,803  | 5 | 1 | 6 | 0 |
| Case 25 | 5 | 26,072,458  | 27,982,697  | 5 | 2 | 7 | 0 |
| Case 25 | 5 | 27,983,106  | 31,711,888  | 5 | 1 | 6 | 0 |
| Case 25 | 5 | 31,713,446  | 32,302,552  | 4 | 1 | 5 | 0 |
| Case 25 | 5 | 32,308,706  | 33,671,338  | 5 | 1 | 6 | 0 |
| Case 25 | 5 | 33,678,161  | 33,831,305  | 5 | 2 | 7 | 0 |
| Case 25 | 5 | 33,831,355  | 39,615,631  | 5 | 1 | 6 | 0 |
| Case 25 | 5 | 39,625,080  | 40,291,889  | 5 | 2 | 7 | 0 |
| Case 25 | 5 | 40,293,299  | 46,399,093  | 5 | 1 | 6 | 0 |
| Case 25 | 5 | 49,457,282  | 49,586,870  | 2 | 1 | 3 | 0 |
| Case 25 | 5 | 49,597,497  | 59,165,423  | 2 | 2 | 4 | 0 |
| Case 25 | 5 | 59,168,351  | 59,330,489  | 2 | 0 | 2 | 1 |
| Case 25 | 5 | 59,336,110  | 61,642,831  | 2 | 2 | 4 | 0 |
| Case 25 | 5 | 61,643,910  | 61,857,063  | 2 | 1 | 3 | 0 |
| Case 25 | 5 | 61,857,577  | 64,762,465  | 2 | 2 | 4 | 0 |
| Case 25 | 5 | 64,763,225  | 64,965,757  | 2 | 1 | 3 | 0 |
| Case 25 | 5 | 64,965,900  | 68,349,917  | 2 | 2 | 4 | 0 |
| Case 25 | 5 | 68,364,871  | 70,862,059  | 2 | 1 | 3 | 0 |
| Case 25 | 5 | 70,862,874  | 71,924,577  | 2 | 2 | 4 | 0 |
| Case 25 | 5 | 71,927,013  | 72,407,538  | 2 | 1 | 3 | 0 |
| Case 25 | 5 | 72,408,246  | 74,034,229  | 2 | 2 | 4 | 0 |
| Case 25 | 5 | 74,034,400  | 74,239,946  | 2 | 1 | 3 | 0 |
| Case 25 | 5 | 74,242,852  | 77,406,104  | 2 | 2 | 4 | 0 |
| Case 25 | 5 | 77,409,637  | 77,618,179  | 2 | 1 | 3 | 0 |
| Case 25 | 5 | 77,624,910  | 78,272,540  | 2 | 2 | 4 | 0 |
| Case 25 | 5 | 78,276,148  | 78,981,550  | 2 | 1 | 3 | 0 |
| Case 25 | 5 | 78,984,173  | 79,029,594  | 2 | 2 | 4 | 0 |
| Case 25 | 5 | 79,029,675  | 79,033,074  | 2 | 1 | 3 | 0 |
| Case 25 | 5 | 79,033,215  | 79,548,274  | 2 | 2 | 4 | 0 |
| Case 25 | 5 | 79,549,684  | 79,801,520  | 2 | 1 | 3 | 0 |
| Case 25 | 5 | 79,809,468  | 92,969,334  | 2 | 2 | 4 | 0 |
| Case 25 | 5 | 92,980,916  | 93,489,746  | 2 | 0 | 2 | 1 |
| Case 25 | 5 | 93,545,524  | 93,751,943  | 2 | 2 | 4 | 0 |
| Case 25 | 5 | 93,753,017  | 94,074,109  | 2 | 1 | 3 | 0 |
| Case 25 | 5 | 94,082,218  | 108,046,359 | 2 | 2 | 4 | 0 |
| Case 25 | 5 | 108,048,835 | 108,380,950 | 2 | 1 | 3 | 0 |
| Case 25 | 5 | 108,386,660 | 110,441,042 | 2 | 2 | 4 | 0 |
| Case 25 | 5 | 110,441,044 | 110,467,237 | 2 | 1 | 3 | 0 |
| Case 25 | 5 | 110,474,161 | 112,874,802 | 2 | 2 | 4 | 0 |
| Case 25 | 5 | 112,874,834 | 112,977,399 | 2 | 1 | 3 | 0 |
| Case 25 | 5 | 112,979,910 | 117,825,588 | 2 | 2 | 4 | 0 |
| Case 25 | 5 | 117,843,869 | 117,863,779 | 2 | 0 | 2 | 1 |
| Case 25 | 5 | 117,869,104 | 117,955,915 | 1 | 0 | 1 | 0 |
| Case 25 | 5 | 117,963,002 | 117,967,649 | 2 | 0 | 2 | 1 |
| Case 25 | 5 | 117,968,633 | 118,179,104 | 2 | 2 | 4 | 0 |
| Case 25 | 5 | 118,180,935 | 118,580,203 | 2 | 1 | 3 | 0 |
| Case 25 | 5 | 118,582,779 | 125,874,334 | 2 | 2 | 4 | 0 |
| Case 25 | 5 | 125,874,525 | 125,921,768 | 2 | 1 | 3 | 0 |
| Case 25 | 5 | 125,923,632 | 133,481,467 | 2 | 2 | 4 | 0 |
| Case 25 | 5 | 133,481,488 | 134,258,183 | 2 | 1 | 3 | 0 |
| Case 25 | 5 | 134,270,779 | 137,086,605 | 2 | 2 | 4 | 0 |
| Case 25 | 5 | 137,088,234 | 137,801,526 | 2 | 1 | 3 | 0 |
| Case 25 | 5 | 137,801,592 | 138,583,691 | 2 | 2 | 4 | 0 |
| Case 25 | 5 | 138,615,856 | 139,060,631 | 2 | 1 | 3 | 0 |
| Case 25 | 5 | 139,063,728 | 139,745,739 | 2 | 2 | 4 | 0 |
| Case 25 | 5 | 139,745,800 | 139,931,384 | 2 | 1 | 3 | 0 |
| Case 25 | 5 | 139,931,607 | 139,931,653 | 0 | 0 | 0 | 0 |
| Case 25 | 5 | 139,931,655 | 139,938,337 | 2 | 0 | 2 | 1 |
| Case 25 | 5 | 139,938,369 | 141,343,853 | 2 | 2 | 4 | 0 |

|         |   |             |             |   |   |   |   |
|---------|---|-------------|-------------|---|---|---|---|
| Case 25 | 5 | 141,344,123 | 141,428,161 | 2 | 1 | 3 | 0 |
| Case 25 | 5 | 141,432,269 | 162,320,221 | 2 | 2 | 4 | 0 |
| Case 25 | 5 | 162,321,929 | 180,693,127 | 2 | 1 | 3 | 0 |
| Case 25 | 6 | 108,666     | 11,322,636  | 2 | 2 | 4 | 0 |
| Case 25 | 6 | 11,323,227  | 12,616,996  | 3 | 2 | 5 | 0 |
| Case 25 | 6 | 12,618,970  | 17,831,401  | 2 | 2 | 4 | 0 |
| Case 25 | 6 | 17,831,419  | 18,224,471  | 3 | 2 | 5 | 0 |
| Case 25 | 6 | 18,225,173  | 19,975,946  | 3 | 3 | 6 | 0 |
| Case 25 | 6 | 19,987,971  | 20,487,597  | 3 | 2 | 5 | 0 |
| Case 25 | 6 | 20,488,234  | 21,157,038  | 3 | 3 | 6 | 0 |
| Case 25 | 6 | 21,157,173  | 22,018,581  | 3 | 2 | 5 | 0 |
| Case 25 | 6 | 22,018,994  | 23,913,528  | 3 | 3 | 6 | 0 |
| Case 25 | 6 | 23,915,870  | 23,924,306  | 3 | 0 | 3 | 1 |
| Case 25 | 6 | 23,929,237  | 24,275,383  | 3 | 3 | 6 | 0 |
| Case 25 | 6 | 24,278,382  | 25,780,332  | 3 | 2 | 5 | 0 |
| Case 25 | 6 | 25,780,811  | 31,337,633  | 2 | 2 | 4 | 0 |
| Case 25 | 6 | 31,338,528  | 31,341,357  | 2 | 0 | 2 | 1 |
| Case 25 | 6 | 31,342,484  | 32,685,685  | 2 | 2 | 4 | 0 |
| Case 25 | 6 | 32,685,865  | 32,789,807  | 3 | 2 | 5 | 0 |
| Case 25 | 6 | 32,790,059  | 45,690,246  | 2 | 2 | 4 | 0 |
| Case 25 | 6 | 45,692,933  | 46,047,970  | 3 | 2 | 5 | 0 |
| Case 25 | 6 | 46,054,285  | 46,786,183  | 2 | 2 | 4 | 0 |
| Case 25 | 6 | 46,787,394  | 48,792,612  | 3 | 2 | 5 | 0 |
| Case 25 | 6 | 48,807,046  | 49,547,409  | 3 | 1 | 4 | 0 |
| Case 25 | 6 | 49,552,535  | 52,268,008  | 3 | 2 | 5 | 0 |
| Case 25 | 6 | 52,268,099  | 53,066,595  | 2 | 2 | 4 | 0 |
| Case 25 | 6 | 53,068,349  | 56,569,104  | 3 | 2 | 5 | 0 |
| Case 25 | 6 | 56,598,426  | 58,752,089  | 2 | 2 | 4 | 0 |
| Case 25 | 6 | 61,891,118  | 62,761,314  | 2 | 2 | 4 | 0 |
| Case 25 | 6 | 62,768,560  | 63,652,377  | 3 | 2 | 5 | 0 |
| Case 25 | 6 | 63,658,063  | 64,944,072  | 2 | 2 | 4 | 0 |
| Case 25 | 6 | 64,946,169  | 65,565,140  | 3 | 2 | 5 | 0 |
| Case 25 | 6 | 65,577,402  | 74,123,363  | 2 | 2 | 4 | 0 |
| Case 25 | 6 | 74,123,559  | 74,229,792  | 2 | 1 | 3 | 0 |
| Case 25 | 6 | 74,234,043  | 88,240,047  | 2 | 2 | 4 | 0 |
| Case 25 | 6 | 88,240,570  | 88,326,126  | 2 | 1 | 3 | 0 |
| Case 25 | 6 | 88,329,942  | 90,340,446  | 2 | 2 | 4 | 0 |
| Case 25 | 6 | 90,340,454  | 90,577,712  | 2 | 1 | 3 | 0 |
| Case 25 | 6 | 90,577,714  | 107,408,585 | 2 | 2 | 4 | 0 |
| Case 25 | 6 | 107,413,934 | 107,592,818 | 2 | 1 | 3 | 0 |
| Case 25 | 6 | 107,595,311 | 135,465,474 | 2 | 2 | 4 | 0 |
| Case 25 | 6 | 135,468,891 | 135,617,601 | 3 | 2 | 5 | 0 |
| Case 25 | 6 | 135,619,996 | 144,811,319 | 2 | 2 | 4 | 0 |
| Case 25 | 6 | 144,812,186 | 144,860,488 | 2 | 1 | 3 | 0 |
| Case 25 | 6 | 144,861,946 | 149,814,762 | 2 | 2 | 4 | 0 |
| Case 25 | 6 | 149,820,948 | 150,195,384 | 2 | 1 | 3 | 0 |
| Case 25 | 6 | 150,198,491 | 150,897,232 | 2 | 2 | 4 | 0 |
| Case 25 | 6 | 150,900,125 | 151,149,833 | 2 | 1 | 3 | 0 |
| Case 25 | 6 | 151,151,811 | 152,722,356 | 2 | 2 | 4 | 0 |
| Case 25 | 6 | 152,722,368 | 152,777,157 | 2 | 1 | 3 | 0 |
| Case 25 | 6 | 152,778,598 | 162,646,892 | 2 | 2 | 4 | 0 |
| Case 25 | 6 | 162,653,609 | 162,804,504 | 2 | 0 | 2 | 1 |
| Case 25 | 6 | 162,809,009 | 168,432,236 | 2 | 2 | 4 | 0 |
| Case 25 | 6 | 168,434,641 | 168,465,737 | 2 | 1 | 3 | 0 |
| Case 25 | 6 | 168,466,504 | 169,981,120 | 2 | 2 | 4 | 0 |
| Case 25 | 6 | 169,982,991 | 170,444,663 | 2 | 1 | 3 | 0 |
| Case 25 | 6 | 170,444,698 | 170,599,385 | 2 | 2 | 4 | 0 |
| Case 25 | 6 | 170,615,155 | 170,980,171 | 2 | 1 | 3 | 0 |
| Case 25 | 7 | 44,935      | 68,920      | 4 | 1 | 5 | 0 |
| Case 25 | 7 | 83,185      | 3,101,279   | 3 | 2 | 5 | 0 |
| Case 25 | 7 | 3,101,370   | 4,740,621   | 3 | 3 | 6 | 0 |

|         |   |             |             |   |   |   |   |
|---------|---|-------------|-------------|---|---|---|---|
| Case 25 | 7 | 4,749,527   | 6,859,544   | 3 | 2 | 5 | 0 |
| Case 25 | 7 | 6,870,635   | 7,490,418   | 3 | 3 | 6 | 0 |
| Case 25 | 7 | 7,491,966   | 7,491,966   | 4 | 0 | 4 | 1 |
| Case 25 | 7 | 7,491,996   | 7,491,996   | 5 | 0 | 5 | 1 |
| Case 25 | 7 | 7,492,402   | 20,744,563  | 4 | 3 | 7 | 0 |
| Case 25 | 7 | 20,750,849  | 20,750,849  | 5 | 0 | 5 | 1 |
| Case 25 | 7 | 20,754,102  | 44,524,709  | 3 | 3 | 6 | 0 |
| Case 25 | 7 | 44,524,781  | 44,837,298  | 3 | 2 | 5 | 0 |
| Case 25 | 7 | 44,839,616  | 55,968,447  | 3 | 3 | 6 | 0 |
| Case 25 | 7 | 55,975,311  | 58,019,061  | 3 | 2 | 5 | 0 |
| Case 25 | 7 | 61,056,053  | 61,852,895  | 3 | 2 | 5 | 0 |
| Case 25 | 7 | 61,994,170  | 62,517,629  | 3 | 0 | 3 | 1 |
| Case 25 | 7 | 62,527,743  | 69,007,901  | 4 | 0 | 4 | 1 |
| Case 25 | 7 | 69,031,759  | 69,266,730  | 5 | 0 | 5 | 1 |
| Case 25 | 7 | 69,282,553  | 77,426,482  | 4 | 0 | 4 | 1 |
| Case 25 | 7 | 77,426,623  | 80,048,871  | 5 | 0 | 5 | 1 |
| Case 25 | 7 | 80,051,323  | 80,075,157  | 4 | 3 | 7 | 0 |
| Case 25 | 7 | 80,082,966  | 80,100,969  | 5 | 0 | 5 | 1 |
| Case 25 | 7 | 80,101,743  | 80,460,016  | 4 | 3 | 7 | 0 |
| Case 25 | 7 | 80,468,127  | 88,809,649  | 5 | 0 | 5 | 1 |
| Case 25 | 7 | 88,809,850  | 100,674,467 | 4 | 0 | 4 | 1 |
| Case 25 | 7 | 100,674,899 | 100,685,760 | 3 | 0 | 3 | 1 |
| Case 25 | 7 | 100,685,775 | 107,053,030 | 4 | 0 | 4 | 1 |
| Case 25 | 7 | 107,066,030 | 107,862,789 | 5 | 0 | 5 | 1 |
| Case 25 | 7 | 107,863,395 | 110,931,475 | 6 | 0 | 6 | 1 |
| Case 25 | 7 | 110,932,630 | 113,863,384 | 7 | 0 | 7 | 1 |
| Case 25 | 7 | 113,898,450 | 114,435,347 | 5 | 0 | 5 | 1 |
| Case 25 | 7 | 114,436,126 | 119,659,037 | 7 | 0 | 7 | 1 |
| Case 25 | 7 | 119,672,864 | 119,862,301 | 5 | 0 | 5 | 1 |
| Case 25 | 7 | 119,888,754 | 129,664,210 | 4 | 0 | 4 | 1 |
| Case 25 | 7 | 129,664,312 | 129,775,950 | 3 | 0 | 3 | 1 |
| Case 25 | 7 | 129,777,889 | 135,247,752 | 4 | 0 | 4 | 1 |
| Case 25 | 7 | 135,254,692 | 135,323,351 | 3 | 0 | 3 | 1 |
| Case 25 | 7 | 135,327,969 | 140,014,556 | 4 | 0 | 4 | 1 |
| Case 25 | 7 | 140,015,104 | 140,791,820 | 3 | 0 | 3 | 1 |
| Case 25 | 7 | 140,799,480 | 148,768,041 | 4 | 0 | 4 | 1 |
| Case 25 | 7 | 148,768,368 | 149,529,970 | 3 | 0 | 3 | 1 |
| Case 25 | 7 | 149,530,894 | 150,028,958 | 4 | 0 | 4 | 1 |
| Case 25 | 7 | 150,034,065 | 150,079,459 | 3 | 0 | 3 | 1 |
| Case 25 | 7 | 150,081,485 | 150,934,692 | 4 | 0 | 4 | 1 |
| Case 25 | 7 | 150,934,709 | 151,340,164 | 3 | 0 | 3 | 1 |
| Case 25 | 7 | 151,350,262 | 151,879,438 | 4 | 0 | 4 | 1 |
| Case 25 | 7 | 151,879,489 | 152,408,081 | 3 | 0 | 3 | 1 |
| Case 25 | 7 | 152,420,498 | 157,835,260 | 4 | 0 | 4 | 1 |
| Case 25 | 7 | 157,837,357 | 158,663,897 | 3 | 0 | 3 | 1 |
| Case 25 | 7 | 158,663,939 | 159,119,486 | 4 | 0 | 4 | 1 |
| Case 25 | 8 | 164,984     | 197,042     | 3 | 0 | 3 | 1 |
| Case 25 | 8 | 198,583     | 6,129,051   | 3 | 1 | 4 | 0 |
| Case 25 | 8 | 6,136,512   | 6,155,658   | 1 | 0 | 1 | 0 |
| Case 25 | 8 | 6,159,718   | 7,308,674   | 3 | 1 | 4 | 0 |
| Case 25 | 8 | 7,308,691   | 7,881,478   | 1 | 0 | 1 | 0 |
| Case 25 | 8 | 8,094,406   | 8,915,740   | 3 | 1 | 4 | 0 |
| Case 25 | 8 | 8,923,585   | 8,966,606   | 3 | 0 | 3 | 1 |
| Case 25 | 8 | 8,966,972   | 20,787,009  | 3 | 1 | 4 | 0 |
| Case 25 | 8 | 20,787,381  | 32,419,119  | 2 | 1 | 3 | 0 |
| Case 25 | 8 | 32,428,968  | 43,791,691  | 3 | 1 | 4 | 0 |
| Case 25 | 8 | 46,886,735  | 47,491,073  | 6 | 0 | 6 | 1 |
| Case 25 | 8 | 47,528,414  | 96,773,262  | 7 | 0 | 7 | 1 |
| Case 25 | 8 | 96,773,469  | 96,784,717  | 5 | 0 | 5 | 1 |
| Case 25 | 8 | 96,786,148  | 96,804,065  | 6 | 0 | 6 | 1 |
| Case 25 | 8 | 96,804,762  | 104,417,045 | 5 | 2 | 7 | 0 |

|         |   |             |             |   |   |   |   |
|---------|---|-------------|-------------|---|---|---|---|
| Case 25 | 8 | 104,423,486 | 104,428,530 | 6 | 0 | 6 | 1 |
| Case 25 | 8 | 104,432,617 | 117,624,483 | 6 | 1 | 7 | 0 |
| Case 25 | 8 | 117,630,683 | 117,631,964 | 3 | 0 | 3 | 1 |
| Case 25 | 8 | 117,635,577 | 117,635,577 | 6 | 0 | 6 | 1 |
| Case 25 | 8 | 117,636,863 | 119,403,784 | 5 | 2 | 7 | 0 |
| Case 25 | 8 | 119,405,522 | 119,480,896 | 6 | 0 | 6 | 1 |
| Case 25 | 8 | 119,486,034 | 120,367,602 | 5 | 2 | 7 | 0 |
| Case 25 | 8 | 120,368,303 | 124,645,512 | 6 | 1 | 7 | 0 |
| Case 25 | 8 | 124,646,022 | 124,663,857 | 5 | 1 | 6 | 0 |
| Case 25 | 8 | 124,663,895 | 126,983,953 | 5 | 2 | 7 | 0 |
| Case 25 | 8 | 126,984,970 | 133,139,755 | 6 | 1 | 7 | 0 |
| Case 25 | 8 | 133,141,636 | 142,025,644 | 5 | 2 | 7 | 0 |
| Case 25 | 8 | 142,038,599 | 144,928,660 | 5 | 1 | 6 | 0 |
| Case 25 | 8 | 144,929,811 | 144,942,570 | 4 | 1 | 5 | 0 |
| Case 25 | 8 | 144,942,718 | 144,943,389 | 5 | 1 | 6 | 0 |
| Case 25 | 8 | 144,943,442 | 144,946,818 | 5 | 2 | 7 | 0 |
| Case 25 | 8 | 144,947,073 | 146,135,866 | 5 | 1 | 6 | 0 |
| Case 25 | 8 | 146,145,702 | 146,293,414 | 5 | 2 | 7 | 0 |
| Case 25 | 9 | 46,587      | 707,463     | 2 | 0 | 2 | 1 |
| Case 25 | 9 | 710,818     | 712,829     | 3 | 0 | 3 | 1 |
| Case 25 | 9 | 712,856     | 968,044     | 2 | 0 | 2 | 1 |
| Case 25 | 9 | 968,054     | 1,056,975   | 3 | 0 | 3 | 1 |
| Case 25 | 9 | 1,057,116   | 1,183,695   | 2 | 0 | 2 | 1 |
| Case 25 | 9 | 1,183,870   | 1,315,843   | 3 | 0 | 3 | 1 |
| Case 25 | 9 | 1,315,952   | 1,666,693   | 2 | 0 | 2 | 1 |
| Case 25 | 9 | 1,667,544   | 1,945,517   | 3 | 0 | 3 | 1 |
| Case 25 | 9 | 1,950,813   | 2,127,796   | 2 | 0 | 2 | 1 |
| Case 25 | 9 | 2,128,262   | 2,198,627   | 3 | 0 | 3 | 1 |
| Case 25 | 9 | 2,198,823   | 2,635,545   | 2 | 0 | 2 | 1 |
| Case 25 | 9 | 2,636,161   | 2,718,349   | 3 | 0 | 3 | 1 |
| Case 25 | 9 | 2,718,415   | 3,810,196   | 2 | 0 | 2 | 1 |
| Case 25 | 9 | 3,810,281   | 4,193,350   | 3 | 0 | 3 | 1 |
| Case 25 | 9 | 4,193,531   | 4,303,682   | 2 | 0 | 2 | 1 |
| Case 25 | 9 | 4,304,915   | 4,335,668   | 3 | 0 | 3 | 1 |
| Case 25 | 9 | 4,338,987   | 4,545,998   | 2 | 0 | 2 | 1 |
| Case 25 | 9 | 4,546,319   | 4,625,359   | 3 | 0 | 3 | 1 |
| Case 25 | 9 | 4,625,415   | 5,464,065   | 2 | 0 | 2 | 1 |
| Case 25 | 9 | 5,465,130   | 5,581,140   | 3 | 0 | 3 | 1 |
| Case 25 | 9 | 5,593,419   | 5,870,703   | 2 | 0 | 2 | 1 |
| Case 25 | 9 | 5,872,531   | 5,922,529   | 3 | 0 | 3 | 1 |
| Case 25 | 9 | 5,922,860   | 7,170,742   | 2 | 0 | 2 | 1 |
| Case 25 | 9 | 7,173,500   | 7,275,995   | 3 | 0 | 3 | 1 |
| Case 25 | 9 | 7,276,387   | 7,357,693   | 2 | 0 | 2 | 1 |
| Case 25 | 9 | 7,360,902   | 7,682,063   | 3 | 0 | 3 | 1 |
| Case 25 | 9 | 7,682,601   | 12,092,193  | 2 | 0 | 2 | 1 |
| Case 25 | 9 | 12,092,895  | 12,317,717  | 1 | 0 | 1 | 0 |
| Case 25 | 9 | 12,318,093  | 12,722,357  | 2 | 0 | 2 | 1 |
| Case 25 | 9 | 12,730,636  | 13,110,705  | 3 | 0 | 3 | 1 |
| Case 25 | 9 | 13,112,024  | 14,334,138  | 2 | 0 | 2 | 1 |
| Case 25 | 9 | 14,338,470  | 14,588,049  | 3 | 0 | 3 | 1 |
| Case 25 | 9 | 14,589,694  | 14,769,803  | 2 | 0 | 2 | 1 |
| Case 25 | 9 | 14,770,658  | 14,899,708  | 3 | 0 | 3 | 1 |
| Case 25 | 9 | 14,900,356  | 16,125,443  | 2 | 0 | 2 | 1 |
| Case 25 | 9 | 16,127,905  | 16,492,516  | 3 | 0 | 3 | 1 |
| Case 25 | 9 | 16,500,789  | 17,792,845  | 2 | 0 | 2 | 1 |
| Case 25 | 9 | 17,793,435  | 18,016,234  | 3 | 0 | 3 | 1 |
| Case 25 | 9 | 18,017,007  | 18,090,973  | 2 | 0 | 2 | 1 |
| Case 25 | 9 | 18,091,440  | 18,244,652  | 3 | 0 | 3 | 1 |
| Case 25 | 9 | 18,246,545  | 18,676,945  | 2 | 0 | 2 | 1 |
| Case 25 | 9 | 18,679,376  | 18,950,895  | 3 | 0 | 3 | 1 |
| Case 25 | 9 | 18,952,553  | 19,058,204  | 2 | 0 | 2 | 1 |

|         |   |            |            |   |   |   |   |
|---------|---|------------|------------|---|---|---|---|
| Case 25 | 9 | 19,058,396 | 19,063,081 | 2 | 2 | 4 | 0 |
| Case 25 | 9 | 19,065,295 | 19,465,900 | 2 | 0 | 2 | 1 |
| Case 25 | 9 | 19,468,530 | 19,790,795 | 3 | 0 | 3 | 1 |
| Case 25 | 9 | 19,792,882 | 19,942,824 | 2 | 0 | 2 | 1 |
| Case 25 | 9 | 19,946,627 | 20,001,782 | 3 | 0 | 3 | 1 |
| Case 25 | 9 | 20,005,312 | 20,287,612 | 2 | 0 | 2 | 1 |
| Case 25 | 9 | 20,287,948 | 20,363,474 | 3 | 0 | 3 | 1 |
| Case 25 | 9 | 20,379,884 | 21,543,444 | 2 | 0 | 2 | 1 |
| Case 25 | 9 | 21,547,035 | 21,606,786 | 3 | 0 | 3 | 1 |
| Case 25 | 9 | 21,611,256 | 26,500,046 | 2 | 0 | 2 | 1 |
| Case 25 | 9 | 26,506,732 | 26,653,154 | 3 | 0 | 3 | 1 |
| Case 25 | 9 | 26,657,127 | 26,905,703 | 2 | 0 | 2 | 1 |
| Case 25 | 9 | 26,907,931 | 27,885,011 | 2 | 2 | 4 | 0 |
| Case 25 | 9 | 27,894,033 | 28,715,676 | 6 | 1 | 7 | 0 |
| Case 25 | 9 | 28,719,213 | 29,632,142 | 4 | 2 | 6 | 0 |
| Case 25 | 9 | 29,636,965 | 29,639,093 | 3 | 2 | 5 | 0 |
| Case 25 | 9 | 29,639,398 | 36,693,098 | 2 | 2 | 4 | 0 |
| Case 25 | 9 | 36,697,735 | 37,685,362 | 6 | 1 | 7 | 0 |
| Case 25 | 9 | 37,686,417 | 37,744,911 | 5 | 1 | 6 | 0 |
| Case 25 | 9 | 37,745,042 | 37,974,811 | 4 | 1 | 5 | 0 |
| Case 25 | 9 | 37,990,801 | 46,944,322 | 2 | 2 | 4 | 0 |
| Case 25 | 9 | 65,629,772 | 72,115,498 | 2 | 2 | 4 | 0 |
| Case 25 | 9 | 72,115,711 | 72,435,826 | 2 | 1 | 3 | 0 |
| Case 25 | 9 | 72,435,842 | 72,609,532 | 2 | 2 | 4 | 0 |
| Case 25 | 9 | 72,611,680 | 73,029,831 | 2 | 1 | 3 | 0 |
| Case 25 | 9 | 73,038,018 | 73,239,062 | 2 | 2 | 4 | 0 |
| Case 25 | 9 | 73,239,605 | 73,935,165 | 2 | 1 | 3 | 0 |
| Case 25 | 9 | 73,935,754 | 74,374,194 | 2 | 2 | 4 | 0 |
| Case 25 | 9 | 74,378,277 | 75,529,783 | 2 | 1 | 3 | 0 |
| Case 25 | 9 | 75,529,888 | 77,222,828 | 2 | 2 | 4 | 0 |
| Case 25 | 9 | 77,224,088 | 77,991,404 | 2 | 1 | 3 | 0 |
| Case 25 | 9 | 77,992,822 | 78,615,371 | 2 | 2 | 4 | 0 |
| Case 25 | 9 | 78,619,829 | 78,810,887 | 2 | 1 | 3 | 0 |
| Case 25 | 9 | 78,811,377 | 78,957,136 | 2 | 2 | 4 | 0 |
| Case 25 | 9 | 78,958,599 | 79,320,000 | 2 | 1 | 3 | 0 |
| Case 25 | 9 | 79,320,095 | 79,437,798 | 2 | 2 | 4 | 0 |
| Case 25 | 9 | 79,438,584 | 80,040,495 | 2 | 1 | 3 | 0 |
| Case 25 | 9 | 80,040,625 | 80,930,439 | 2 | 2 | 4 | 0 |
| Case 25 | 9 | 80,932,515 | 81,100,971 | 2 | 1 | 3 | 0 |
| Case 25 | 9 | 81,101,590 | 81,594,461 | 2 | 2 | 4 | 0 |
| Case 25 | 9 | 81,596,162 | 81,759,693 | 2 | 1 | 3 | 0 |
| Case 25 | 9 | 81,760,880 | 81,926,600 | 2 | 2 | 4 | 0 |
| Case 25 | 9 | 81,928,572 | 82,873,587 | 2 | 1 | 3 | 0 |
| Case 25 | 9 | 82,874,140 | 83,173,323 | 2 | 2 | 4 | 0 |
| Case 25 | 9 | 83,174,096 | 85,574,053 | 2 | 1 | 3 | 0 |
| Case 25 | 9 | 85,577,007 | 85,725,775 | 2 | 2 | 4 | 0 |
| Case 25 | 9 | 85,735,656 | 87,570,862 | 2 | 1 | 3 | 0 |
| Case 25 | 9 | 87,570,912 | 88,162,066 | 2 | 2 | 4 | 0 |
| Case 25 | 9 | 88,164,213 | 90,169,540 | 2 | 1 | 3 | 0 |
| Case 25 | 9 | 90,170,231 | 90,322,200 | 2 | 2 | 4 | 0 |
| Case 25 | 9 | 90,323,220 | 91,183,368 | 2 | 1 | 3 | 0 |
| Case 25 | 9 | 91,186,956 | 91,616,843 | 2 | 2 | 4 | 0 |
| Case 25 | 9 | 91,616,909 | 92,017,824 | 2 | 1 | 3 | 0 |
| Case 25 | 9 | 92,020,291 | 92,254,212 | 2 | 2 | 4 | 0 |
| Case 25 | 9 | 92,254,248 | 92,700,500 | 2 | 1 | 3 | 0 |
| Case 25 | 9 | 92,701,618 | 93,080,054 | 2 | 2 | 4 | 0 |
| Case 25 | 9 | 93,080,194 | 93,595,807 | 2 | 1 | 3 | 0 |
| Case 25 | 9 | 93,596,067 | 93,844,314 | 2 | 2 | 4 | 0 |
| Case 25 | 9 | 93,849,856 | 94,485,232 | 2 | 1 | 3 | 0 |
| Case 25 | 9 | 94,485,971 | 94,685,926 | 2 | 2 | 4 | 0 |
| Case 25 | 9 | 94,686,736 | 96,522,109 | 2 | 1 | 3 | 0 |

|         |    |             |             |   |   |   |   |
|---------|----|-------------|-------------|---|---|---|---|
| Case 25 | 9  | 96,522,775  | 96,766,248  | 2 | 2 | 4 | 0 |
| Case 25 | 9  | 96,769,237  | 97,252,505  | 2 | 1 | 3 | 0 |
| Case 25 | 9  | 97,253,578  | 97,861,437  | 2 | 2 | 4 | 0 |
| Case 25 | 9  | 97,862,327  | 98,122,445  | 2 | 1 | 3 | 0 |
| Case 25 | 9  | 98,131,102  | 98,555,942  | 2 | 2 | 4 | 0 |
| Case 25 | 9  | 98,559,246  | 100,082,422 | 2 | 1 | 3 | 0 |
| Case 25 | 9  | 100,085,148 | 100,365,473 | 2 | 2 | 4 | 0 |
| Case 25 | 9  | 100,366,843 | 100,451,916 | 2 | 1 | 3 | 0 |
| Case 25 | 9  | 100,459,578 | 100,666,931 | 2 | 2 | 4 | 0 |
| Case 25 | 9  | 100,667,157 | 101,144,927 | 2 | 1 | 3 | 0 |
| Case 25 | 9  | 101,147,503 | 101,351,051 | 2 | 2 | 4 | 0 |
| Case 25 | 9  | 101,351,818 | 103,835,968 | 2 | 1 | 3 | 0 |
| Case 25 | 9  | 103,839,683 | 104,644,870 | 2 | 2 | 4 | 0 |
| Case 25 | 9  | 104,650,296 | 104,801,485 | 2 | 1 | 3 | 0 |
| Case 25 | 9  | 104,802,798 | 105,060,163 | 2 | 2 | 4 | 0 |
| Case 25 | 9  | 105,063,781 | 107,564,939 | 2 | 1 | 3 | 0 |
| Case 25 | 9  | 107,568,705 | 107,593,318 | 2 | 2 | 4 | 0 |
| Case 25 | 9  | 107,593,329 | 108,595,364 | 2 | 1 | 3 | 0 |
| Case 25 | 9  | 108,596,042 | 109,162,816 | 2 | 2 | 4 | 0 |
| Case 25 | 9  | 109,164,956 | 109,410,667 | 2 | 1 | 3 | 0 |
| Case 25 | 9  | 109,417,359 | 109,954,812 | 2 | 2 | 4 | 0 |
| Case 25 | 9  | 109,957,950 | 110,688,855 | 2 | 1 | 3 | 0 |
| Case 25 | 9  | 110,690,301 | 111,642,535 | 2 | 2 | 4 | 0 |
| Case 25 | 9  | 111,644,410 | 111,976,056 | 2 | 1 | 3 | 0 |
| Case 25 | 9  | 111,978,049 | 112,315,013 | 2 | 2 | 4 | 0 |
| Case 25 | 9  | 112,317,462 | 112,553,003 | 2 | 1 | 3 | 0 |
| Case 25 | 9  | 112,554,953 | 112,918,755 | 2 | 2 | 4 | 0 |
| Case 25 | 9  | 112,919,288 | 113,343,555 | 2 | 1 | 3 | 0 |
| Case 25 | 9  | 113,345,800 | 113,632,279 | 2 | 2 | 4 | 0 |
| Case 25 | 9  | 113,633,737 | 116,710,512 | 2 | 1 | 3 | 0 |
| Case 25 | 9  | 116,711,241 | 117,026,648 | 2 | 2 | 4 | 0 |
| Case 25 | 9  | 117,027,068 | 117,704,155 | 2 | 1 | 3 | 0 |
| Case 25 | 9  | 117,708,099 | 118,550,806 | 2 | 2 | 4 | 0 |
| Case 25 | 9  | 118,552,995 | 118,720,333 | 2 | 1 | 3 | 0 |
| Case 25 | 9  | 118,725,422 | 120,229,555 | 2 | 2 | 4 | 0 |
| Case 25 | 9  | 120,239,806 | 120,476,271 | 2 | 1 | 3 | 0 |
| Case 25 | 9  | 120,476,382 | 123,330,813 | 2 | 2 | 4 | 0 |
| Case 25 | 9  | 123,334,276 | 125,265,317 | 2 | 1 | 3 | 0 |
| Case 25 | 9  | 125,265,496 | 125,517,223 | 2 | 2 | 4 | 0 |
| Case 25 | 9  | 125,538,981 | 126,756,640 | 2 | 1 | 3 | 0 |
| Case 25 | 9  | 126,758,163 | 127,119,442 | 2 | 2 | 4 | 0 |
| Case 25 | 9  | 127,130,137 | 128,791,490 | 2 | 1 | 3 | 0 |
| Case 25 | 9  | 128,791,503 | 129,115,717 | 2 | 2 | 4 | 0 |
| Case 25 | 9  | 129,117,662 | 137,104,155 | 2 | 1 | 3 | 0 |
| Case 25 | 9  | 137,106,879 | 137,373,598 | 1 | 1 | 2 | 0 |
| Case 25 | 9  | 137,374,584 | 139,115,664 | 2 | 1 | 3 | 0 |
| Case 25 | 9  | 139,115,869 | 139,277,886 | 1 | 1 | 2 | 0 |
| Case 25 | 9  | 139,278,407 | 139,411,768 | 2 | 1 | 3 | 0 |
| Case 25 | 9  | 139,412,205 | 139,656,706 | 1 | 1 | 2 | 0 |
| Case 25 | 9  | 139,657,874 | 139,748,005 | 2 | 1 | 3 | 0 |
| Case 25 | 9  | 139,748,023 | 139,754,431 | 1 | 1 | 2 | 0 |
| Case 25 | 9  | 139,756,883 | 139,914,893 | 2 | 1 | 3 | 0 |
| Case 25 | 9  | 139,915,148 | 139,973,090 | 1 | 1 | 2 | 0 |
| Case 25 | 9  | 139,973,130 | 140,006,432 | 2 | 1 | 3 | 0 |
| Case 25 | 9  | 140,006,491 | 140,094,212 | 1 | 1 | 2 | 0 |
| Case 25 | 9  | 140,094,273 | 140,161,526 | 2 | 1 | 3 | 0 |
| Case 25 | 9  | 140,164,250 | 140,392,623 | 1 | 1 | 2 | 0 |
| Case 25 | 9  | 140,392,645 | 141,066,491 | 2 | 1 | 3 | 0 |
| Case 25 | 10 | 98,087      | 3,496,426   | 4 | 0 | 4 | 1 |
| Case 25 | 10 | 3,502,282   | 5,435,983   | 5 | 0 | 5 | 1 |
| Case 25 | 10 | 5,436,009   | 6,387,992   | 4 | 0 | 4 | 1 |



|         |    |             |             |   |   |   |   |
|---------|----|-------------|-------------|---|---|---|---|
| Case 25 | 10 | 6,388,928   | 6,531,149   | 5 | 0 | 5 | 1 |
| Case 25 | 10 | 6,532,178   | 7,908,552   | 4 | 0 | 4 | 1 |
| Case 25 | 10 | 7,922,269   | 11,452,146  | 5 | 0 | 5 | 1 |
| Case 25 | 10 | 11,452,260  | 14,458,385  | 4 | 0 | 4 | 1 |
| Case 25 | 10 | 14,458,582  | 14,781,173  | 5 | 0 | 5 | 1 |
| Case 25 | 10 | 14,782,994  | 17,636,242  | 4 | 0 | 4 | 1 |
| Case 25 | 10 | 17,636,282  | 18,585,219  | 5 | 0 | 5 | 1 |
| Case 25 | 10 | 18,587,820  | 19,034,951  | 4 | 0 | 4 | 1 |
| Case 25 | 10 | 19,043,635  | 21,435,347  | 5 | 0 | 5 | 1 |
| Case 25 | 10 | 21,435,397  | 22,360,446  | 4 | 0 | 4 | 1 |
| Case 25 | 10 | 22,362,410  | 27,192,279  | 5 | 0 | 5 | 1 |
| Case 25 | 10 | 27,193,821  | 27,692,279  | 4 | 0 | 4 | 1 |
| Case 25 | 10 | 27,692,307  | 28,596,995  | 5 | 0 | 5 | 1 |
| Case 25 | 10 | 28,597,192  | 28,975,214  | 4 | 0 | 4 | 1 |
| Case 25 | 10 | 28,975,522  | 30,408,814  | 5 | 0 | 5 | 1 |
| Case 25 | 10 | 30,413,194  | 31,019,935  | 4 | 0 | 4 | 1 |
| Case 25 | 10 | 31,022,598  | 32,088,412  | 5 | 0 | 5 | 1 |
| Case 25 | 10 | 32,089,191  | 33,451,379  | 7 | 0 | 7 | 1 |
| Case 25 | 10 | 33,454,715  | 35,883,547  | 5 | 0 | 5 | 1 |
| Case 25 | 10 | 35,885,299  | 38,415,965  | 4 | 0 | 4 | 1 |
| Case 25 | 10 | 38,416,754  | 39,097,912  | 5 | 0 | 5 | 1 |
| Case 25 | 10 | 42,436,301  | 44,291,108  | 5 | 0 | 5 | 1 |
| Case 25 | 10 | 44,292,364  | 45,282,703  | 6 | 0 | 6 | 1 |
| Case 25 | 10 | 45,300,460  | 45,317,971  | 5 | 0 | 5 | 1 |
| Case 25 | 10 | 45,319,654  | 49,393,643  | 4 | 0 | 4 | 1 |
| Case 25 | 10 | 49,393,685  | 50,386,498  | 5 | 0 | 5 | 1 |
| Case 25 | 10 | 50,388,598  | 51,110,279  | 3 | 0 | 3 | 1 |
| Case 25 | 10 | 51,503,335  | 51,594,462  | 5 | 0 | 5 | 1 |
| Case 25 | 10 | 51,779,268  | 53,309,898  | 3 | 0 | 3 | 1 |
| Case 25 | 10 | 53,317,506  | 57,669,027  | 5 | 0 | 5 | 1 |
| Case 25 | 10 | 57,671,424  | 58,121,201  | 4 | 0 | 4 | 1 |
| Case 25 | 10 | 58,138,121  | 60,668,561  | 5 | 0 | 5 | 1 |
| Case 25 | 10 | 60,671,286  | 61,450,153  | 6 | 0 | 6 | 1 |
| Case 25 | 10 | 61,452,116  | 61,895,547  | 5 | 0 | 5 | 1 |
| Case 25 | 10 | 61,900,356  | 66,734,414  | 6 | 0 | 6 | 1 |
| Case 25 | 10 | 66,741,449  | 70,102,749  | 3 | 0 | 3 | 1 |
| Case 25 | 10 | 70,103,461  | 70,276,553  | 2 | 0 | 2 | 1 |
| Case 25 | 10 | 70,319,321  | 91,465,167  | 3 | 0 | 3 | 1 |
| Case 25 | 10 | 91,468,925  | 91,518,638  | 2 | 0 | 2 | 1 |
| Case 25 | 10 | 91,520,368  | 94,656,941  | 3 | 0 | 3 | 1 |
| Case 25 | 10 | 94,659,394  | 94,811,786  | 2 | 0 | 2 | 1 |
| Case 25 | 10 | 94,813,177  | 95,429,007  | 3 | 0 | 3 | 1 |
| Case 25 | 10 | 95,430,585  | 95,472,007  | 2 | 0 | 2 | 1 |
| Case 25 | 10 | 95,472,127  | 104,855,656 | 3 | 0 | 3 | 1 |
| Case 25 | 10 | 104,857,218 | 105,152,127 | 2 | 0 | 2 | 1 |
| Case 25 | 10 | 105,154,089 | 110,441,149 | 3 | 0 | 3 | 1 |
| Case 25 | 10 | 110,451,504 | 110,573,160 | 6 | 0 | 6 | 1 |
| Case 25 | 10 | 110,576,832 | 120,342,865 | 5 | 0 | 5 | 1 |
| Case 25 | 10 | 120,343,777 | 120,769,168 | 4 | 0 | 4 | 1 |
| Case 25 | 10 | 120,770,637 | 120,862,541 | 3 | 0 | 3 | 1 |
| Case 25 | 10 | 120,863,232 | 124,638,827 | 4 | 0 | 4 | 1 |
| Case 25 | 10 | 124,640,763 | 124,812,607 | 3 | 0 | 3 | 1 |
| Case 25 | 10 | 124,812,634 | 126,310,781 | 4 | 0 | 4 | 1 |
| Case 25 | 10 | 126,311,875 | 126,658,862 | 3 | 0 | 3 | 1 |
| Case 25 | 10 | 126,670,356 | 128,209,885 | 4 | 0 | 4 | 1 |
| Case 25 | 10 | 128,217,081 | 132,897,429 | 3 | 0 | 3 | 1 |
| Case 25 | 10 | 132,901,331 | 133,562,475 | 4 | 0 | 4 | 1 |
| Case 25 | 10 | 133,564,039 | 135,477,883 | 3 | 0 | 3 | 1 |
| Case 25 | 11 | 193,146     | 379,949     | 2 | 1 | 3 | 0 |
| Case 25 | 11 | 381,754     | 616,865     | 1 | 1 | 2 | 0 |
| Case 25 | 11 | 617,452     | 788,329     | 2 | 1 | 3 | 0 |

|         |    |             |             |   |   |   |   |
|---------|----|-------------|-------------|---|---|---|---|
| Case 25 | 11 | 788,386     | 1,013,992   | 1 | 1 | 2 | 0 |
| Case 25 | 11 | 1,015,021   | 1,062,867   | 2 | 1 | 3 | 0 |
| Case 25 | 11 | 1,062,990   | 1,262,467   | 1 | 1 | 2 | 0 |
| Case 25 | 11 | 1,262,525   | 1,803,095   | 2 | 1 | 3 | 0 |
| Case 25 | 11 | 1,804,417   | 1,861,761   | 1 | 1 | 2 | 0 |
| Case 25 | 11 | 1,861,852   | 4,615,767   | 2 | 1 | 3 | 0 |
| Case 25 | 11 | 4,615,779   | 4,661,826   | 2 | 2 | 4 | 0 |
| Case 25 | 11 | 4,661,919   | 4,790,268   | 2 | 1 | 3 | 0 |
| Case 25 | 11 | 4,790,308   | 4,944,976   | 2 | 2 | 4 | 0 |
| Case 25 | 11 | 4,944,986   | 13,278,027  | 2 | 1 | 3 | 0 |
| Case 25 | 11 | 13,280,556  | 17,022,030  | 2 | 2 | 4 | 0 |
| Case 25 | 11 | 17,025,740  | 17,352,470  | 2 | 1 | 3 | 0 |
| Case 25 | 11 | 17,369,517  | 46,575,394  | 2 | 2 | 4 | 0 |
| Case 25 | 11 | 46,596,674  | 46,872,226  | 2 | 1 | 3 | 0 |
| Case 25 | 11 | 46,872,873  | 47,371,333  | 2 | 2 | 4 | 0 |
| Case 25 | 11 | 47,371,449  | 48,102,806  | 2 | 1 | 3 | 0 |
| Case 25 | 11 | 48,102,867  | 50,332,064  | 2 | 2 | 4 | 0 |
| Case 25 | 11 | 50,345,390  | 50,476,268  | 2 | 1 | 3 | 0 |
| Case 25 | 11 | 50,487,842  | 51,222,017  | 1 | 1 | 2 | 0 |
| Case 25 | 11 | 51,372,036  | 51,591,253  | 2 | 1 | 3 | 0 |
| Case 25 | 11 | 54,794,237  | 56,184,888  | 2 | 1 | 3 | 0 |
| Case 25 | 11 | 56,185,024  | 56,237,927  | 2 | 2 | 4 | 0 |
| Case 25 | 11 | 56,237,966  | 59,209,058  | 2 | 1 | 3 | 0 |
| Case 25 | 11 | 59,210,550  | 59,239,839  | 2 | 2 | 4 | 0 |
| Case 25 | 11 | 59,240,474  | 64,803,351  | 2 | 1 | 3 | 0 |
| Case 25 | 11 | 64,806,049  | 64,813,307  | 1 | 1 | 2 | 0 |
| Case 25 | 11 | 64,813,314  | 66,690,454  | 2 | 1 | 3 | 0 |
| Case 25 | 11 | 66,700,508  | 71,571,654  | 6 | 0 | 6 | 1 |
| Case 25 | 11 | 71,626,089  | 77,920,563  | 5 | 0 | 5 | 1 |
| Case 25 | 11 | 77,920,577  | 77,938,042  | 4 | 1 | 5 | 0 |
| Case 25 | 11 | 77,941,076  | 78,362,665  | 5 | 1 | 6 | 0 |
| Case 25 | 11 | 78,364,513  | 78,454,125  | 4 | 1 | 5 | 0 |
| Case 25 | 11 | 78,460,962  | 93,797,523  | 5 | 1 | 6 | 0 |
| Case 25 | 11 | 93,797,539  | 94,340,728  | 4 | 1 | 5 | 0 |
| Case 25 | 11 | 94,342,567  | 107,128,014 | 5 | 1 | 6 | 0 |
| Case 25 | 11 | 107,132,505 | 107,135,449 | 4 | 1 | 5 | 0 |
| Case 25 | 11 | 107,137,603 | 108,122,700 | 1 | 0 | 1 | 0 |
| Case 25 | 11 | 108,123,551 | 108,169,323 | 0 | 0 | 0 | 0 |
| Case 25 | 11 | 108,169,619 | 108,275,671 | 1 | 0 | 1 | 0 |
| Case 25 | 11 | 108,277,509 | 108,302,517 | 0 | 0 | 0 | 0 |
| Case 25 | 11 | 108,324,816 | 108,352,891 | 1 | 0 | 1 | 0 |
| Case 25 | 11 | 108,354,102 | 108,873,119 | 2 | 0 | 2 | 1 |
| Case 25 | 11 | 108,879,868 | 109,472,829 | 1 | 0 | 1 | 0 |
| Case 25 | 11 | 109,475,560 | 109,651,529 | 2 | 0 | 2 | 1 |
| Case 25 | 11 | 109,651,691 | 110,007,835 | 1 | 0 | 1 | 0 |
| Case 25 | 11 | 110,008,024 | 110,059,838 | 2 | 0 | 2 | 1 |
| Case 25 | 11 | 110,068,043 | 110,357,133 | 1 | 0 | 1 | 0 |
| Case 25 | 11 | 110,359,201 | 110,454,338 | 2 | 0 | 2 | 1 |
| Case 25 | 11 | 110,454,938 | 110,704,745 | 1 | 0 | 1 | 0 |
| Case 25 | 11 | 110,706,265 | 110,853,185 | 2 | 0 | 2 | 1 |
| Case 25 | 11 | 110,853,848 | 111,140,462 | 1 | 0 | 1 | 0 |
| Case 25 | 11 | 111,141,676 | 111,385,726 | 2 | 0 | 2 | 1 |
| Case 25 | 11 | 111,386,259 | 111,405,120 | 1 | 0 | 1 | 0 |
| Case 25 | 11 | 111,405,156 | 111,715,397 | 2 | 0 | 2 | 1 |
| Case 25 | 11 | 111,716,070 | 111,779,529 | 1 | 0 | 1 | 0 |
| Case 25 | 11 | 111,779,556 | 111,899,239 | 2 | 0 | 2 | 1 |
| Case 25 | 11 | 111,899,592 | 112,064,139 | 1 | 0 | 1 | 0 |
| Case 25 | 11 | 112,064,216 | 112,341,198 | 2 | 0 | 2 | 1 |
| Case 25 | 11 | 112,348,123 | 113,069,950 | 1 | 0 | 1 | 0 |
| Case 25 | 11 | 113,072,174 | 113,186,776 | 2 | 0 | 2 | 1 |
| Case 25 | 11 | 113,186,986 | 113,207,946 | 1 | 0 | 1 | 0 |

|         |    |             |             |   |   |   |   |
|---------|----|-------------|-------------|---|---|---|---|
| Case 25 | 11 | 113,208,098 | 113,270,369 | 2 | 0 | 2 | 1 |
| Case 25 | 11 | 113,270,374 | 113,278,447 | 1 | 0 | 1 | 0 |
| Case 25 | 11 | 113,278,764 | 113,411,628 | 2 | 0 | 2 | 1 |
| Case 25 | 11 | 113,413,565 | 113,813,791 | 1 | 0 | 1 | 0 |
| Case 25 | 11 | 113,813,800 | 113,843,477 | 2 | 0 | 2 | 1 |
| Case 25 | 11 | 113,845,161 | 113,913,651 | 1 | 0 | 1 | 0 |
| Case 25 | 11 | 113,925,266 | 114,128,967 | 2 | 0 | 2 | 1 |
| Case 25 | 11 | 114,129,057 | 114,381,972 | 1 | 0 | 1 | 0 |
| Case 25 | 11 | 114,382,144 | 114,465,917 | 2 | 0 | 2 | 1 |
| Case 25 | 11 | 114,467,655 | 114,583,890 | 1 | 0 | 1 | 0 |
| Case 25 | 11 | 114,586,066 | 115,069,973 | 2 | 0 | 2 | 1 |
| Case 25 | 11 | 115,074,234 | 115,255,842 | 1 | 0 | 1 | 0 |
| Case 25 | 11 | 115,262,036 | 115,443,955 | 3 | 1 | 4 | 0 |
| Case 25 | 11 | 115,449,617 | 116,187,828 | 4 | 1 | 5 | 0 |
| Case 25 | 11 | 116,189,247 | 116,431,521 | 3 | 1 | 4 | 0 |
| Case 25 | 11 | 116,436,362 | 116,629,949 | 4 | 1 | 5 | 0 |
| Case 25 | 11 | 116,631,391 | 121,103,704 | 3 | 1 | 4 | 0 |
| Case 25 | 11 | 121,109,489 | 123,522,995 | 4 | 1 | 5 | 0 |
| Case 25 | 11 | 123,523,002 | 124,134,751 | 5 | 1 | 6 | 0 |
| Case 25 | 11 | 124,134,915 | 126,864,588 | 4 | 1 | 5 | 0 |
| Case 25 | 11 | 126,870,276 | 129,710,413 | 5 | 1 | 6 | 0 |
| Case 25 | 11 | 129,712,175 | 129,801,135 | 4 | 1 | 5 | 0 |
| Case 25 | 11 | 129,801,374 | 129,990,587 | 5 | 1 | 6 | 0 |
| Case 25 | 11 | 129,991,563 | 130,440,804 | 4 | 1 | 5 | 0 |
| Case 25 | 11 | 130,445,239 | 130,447,132 | 1 | 0 | 1 | 0 |
| Case 25 | 11 | 130,447,883 | 130,702,192 | 2 | 0 | 2 | 1 |
| Case 25 | 11 | 130,705,653 | 130,716,344 | 1 | 0 | 1 | 0 |
| Case 25 | 11 | 130,717,440 | 130,792,048 | 2 | 0 | 2 | 1 |
| Case 25 | 11 | 130,800,330 | 130,891,895 | 1 | 0 | 1 | 0 |
| Case 25 | 11 | 130,895,725 | 131,637,822 | 2 | 0 | 2 | 1 |
| Case 25 | 11 | 131,639,115 | 131,658,127 | 1 | 0 | 1 | 0 |
| Case 25 | 11 | 131,659,000 | 131,694,876 | 2 | 0 | 2 | 1 |
| Case 25 | 11 | 131,697,483 | 131,733,969 | 1 | 0 | 1 | 0 |
| Case 25 | 11 | 131,734,784 | 131,936,494 | 2 | 0 | 2 | 1 |
| Case 25 | 11 | 131,942,817 | 131,964,858 | 1 | 0 | 1 | 0 |
| Case 25 | 11 | 131,965,039 | 132,136,885 | 2 | 0 | 2 | 1 |
| Case 25 | 11 | 132,138,828 | 132,152,426 | 1 | 0 | 1 | 0 |
| Case 25 | 11 | 132,155,298 | 132,493,026 | 2 | 0 | 2 | 1 |
| Case 25 | 11 | 132,493,495 | 132,742,141 | 1 | 0 | 1 | 0 |
| Case 25 | 11 | 132,742,735 | 132,962,221 | 2 | 0 | 2 | 1 |
| Case 25 | 11 | 132,964,039 | 132,991,763 | 1 | 0 | 1 | 0 |
| Case 25 | 11 | 132,992,699 | 133,057,260 | 2 | 0 | 2 | 1 |
| Case 25 | 11 | 133,057,798 | 133,090,031 | 1 | 0 | 1 | 0 |
| Case 25 | 11 | 133,090,470 | 133,214,582 | 2 | 0 | 2 | 1 |
| Case 25 | 11 | 133,217,324 | 133,245,713 | 1 | 0 | 1 | 0 |
| Case 25 | 11 | 133,246,410 | 133,296,790 | 2 | 0 | 2 | 1 |
| Case 25 | 11 | 133,298,607 | 133,345,006 | 1 | 0 | 1 | 0 |
| Case 25 | 11 | 133,345,127 | 134,047,215 | 2 | 0 | 2 | 1 |
| Case 25 | 11 | 134,047,243 | 134,224,699 | 1 | 0 | 1 | 0 |
| Case 25 | 11 | 134,225,692 | 134,309,805 | 2 | 0 | 2 | 1 |
| Case 25 | 11 | 134,311,804 | 134,411,731 | 1 | 0 | 1 | 0 |
| Case 25 | 11 | 134,411,781 | 134,556,580 | 2 | 0 | 2 | 1 |
| Case 25 | 11 | 134,556,655 | 134,668,051 | 1 | 0 | 1 | 0 |
| Case 25 | 11 | 134,668,079 | 134,736,358 | 2 | 0 | 2 | 1 |
| Case 25 | 11 | 134,738,270 | 134,934,063 | 1 | 0 | 1 | 0 |
| Case 25 | 12 | 191,619     | 9,899,575   | 2 | 2 | 4 | 0 |
| Case 25 | 12 | 9,904,352   | 12,195,292  | 7 | 0 | 7 | 1 |
| Case 25 | 12 | 12,202,173  | 13,366,504  | 2 | 2 | 4 | 0 |
| Case 25 | 12 | 13,366,599  | 14,195,781  | 3 | 2 | 5 | 0 |
| Case 25 | 12 | 14,196,140  | 14,996,026  | 2 | 2 | 4 | 0 |
| Case 25 | 12 | 14,996,040  | 19,427,764  | 3 | 2 | 5 | 0 |

|         |    |             |             |   |   |   |   |
|---------|----|-------------|-------------|---|---|---|---|
| Case 25 | 12 | 19,427,766  | 20,217,448  | 2 | 2 | 4 | 0 |
| Case 25 | 12 | 20,218,803  | 21,908,953  | 3 | 2 | 5 | 0 |
| Case 25 | 12 | 21,916,826  | 23,214,740  | 4 | 2 | 6 | 0 |
| Case 25 | 12 | 23,222,795  | 24,031,006  | 3 | 2 | 5 | 0 |
| Case 25 | 12 | 24,033,225  | 25,772,142  | 2 | 2 | 4 | 0 |
| Case 25 | 12 | 25,775,165  | 26,513,100  | 3 | 2 | 5 | 0 |
| Case 25 | 12 | 26,515,156  | 34,853,011  | 2 | 1 | 3 | 0 |
| Case 25 | 12 | 37,876,400  | 38,155,198  | 2 | 1 | 3 | 0 |
| Case 25 | 12 | 38,187,236  | 40,715,839  | 4 | 0 | 4 | 1 |
| Case 25 | 12 | 40,716,694  | 42,476,613  | 5 | 0 | 5 | 1 |
| Case 25 | 12 | 42,477,570  | 43,000,341  | 4 | 0 | 4 | 1 |
| Case 25 | 12 | 43,001,116  | 47,811,205  | 5 | 0 | 5 | 1 |
| Case 25 | 12 | 47,812,267  | 50,241,013  | 4 | 0 | 4 | 1 |
| Case 25 | 12 | 50,245,706  | 50,290,554  | 5 | 0 | 5 | 1 |
| Case 25 | 12 | 50,291,838  | 53,864,855  | 4 | 0 | 4 | 1 |
| Case 25 | 12 | 53,866,619  | 54,227,826  | 5 | 0 | 5 | 1 |
| Case 25 | 12 | 54,231,159  | 56,349,121  | 6 | 0 | 6 | 1 |
| Case 25 | 12 | 56,349,325  | 56,827,618  | 5 | 0 | 5 | 1 |
| Case 25 | 12 | 56,827,974  | 57,492,307  | 6 | 0 | 6 | 1 |
| Case 25 | 12 | 57,492,342  | 57,921,966  | 5 | 0 | 5 | 1 |
| Case 25 | 12 | 57,921,969  | 58,345,606  | 6 | 0 | 6 | 1 |
| Case 25 | 12 | 58,347,442  | 72,039,421  | 7 | 0 | 7 | 1 |
| Case 25 | 12 | 72,050,842  | 81,719,610  | 3 | 0 | 3 | 1 |
| Case 25 | 12 | 81,722,508  | 85,564,834  | 4 | 0 | 4 | 1 |
| Case 25 | 12 | 85,576,492  | 88,447,475  | 5 | 0 | 5 | 1 |
| Case 25 | 12 | 88,447,483  | 88,589,233  | 4 | 0 | 4 | 1 |
| Case 25 | 12 | 88,589,256  | 93,002,195  | 5 | 0 | 5 | 1 |
| Case 25 | 12 | 93,011,711  | 97,557,708  | 4 | 0 | 4 | 1 |
| Case 25 | 12 | 97,559,117  | 98,897,473  | 5 | 0 | 5 | 1 |
| Case 25 | 12 | 98,899,329  | 98,919,278  | 4 | 0 | 4 | 1 |
| Case 25 | 12 | 98,921,742  | 99,020,453  | 3 | 0 | 3 | 1 |
| Case 25 | 12 | 99,020,476  | 100,042,482 | 4 | 0 | 4 | 1 |
| Case 25 | 12 | 100,042,539 | 100,773,467 | 3 | 0 | 3 | 1 |
| Case 25 | 12 | 100,774,609 | 105,499,040 | 4 | 0 | 4 | 1 |
| Case 25 | 12 | 105,500,390 | 105,564,501 | 3 | 0 | 3 | 1 |
| Case 25 | 12 | 105,567,252 | 109,332,690 | 4 | 0 | 4 | 1 |
| Case 25 | 12 | 109,354,768 | 109,827,461 | 3 | 0 | 3 | 1 |
| Case 25 | 12 | 109,833,146 | 110,108,063 | 4 | 0 | 4 | 1 |
| Case 25 | 12 | 110,108,257 | 113,115,569 | 3 | 0 | 3 | 1 |
| Case 25 | 12 | 113,124,351 | 113,409,260 | 4 | 0 | 4 | 1 |
| Case 25 | 12 | 113,409,794 | 113,962,285 | 3 | 0 | 3 | 1 |
| Case 25 | 12 | 113,962,360 | 116,877,993 | 4 | 0 | 4 | 1 |
| Case 25 | 12 | 116,879,476 | 117,206,259 | 3 | 0 | 3 | 1 |
| Case 25 | 12 | 117,212,543 | 118,075,236 | 4 | 0 | 4 | 1 |
| Case 25 | 12 | 118,079,776 | 121,435,427 | 5 | 0 | 5 | 1 |
| Case 25 | 12 | 121,435,587 | 122,287,612 | 4 | 0 | 4 | 1 |
| Case 25 | 12 | 122,287,613 | 123,276,606 | 5 | 0 | 5 | 1 |
| Case 25 | 12 | 123,280,470 | 124,311,255 | 3 | 0 | 3 | 1 |
| Case 25 | 12 | 124,315,142 | 124,718,558 | 4 | 0 | 4 | 1 |
| Case 25 | 12 | 124,721,161 | 125,116,400 | 3 | 0 | 3 | 1 |
| Case 25 | 12 | 125,116,474 | 125,374,727 | 4 | 0 | 4 | 1 |
| Case 25 | 12 | 125,380,714 | 125,646,451 | 3 | 0 | 3 | 1 |
| Case 25 | 12 | 125,652,226 | 127,329,530 | 4 | 0 | 4 | 1 |
| Case 25 | 12 | 127,335,152 | 127,546,002 | 5 | 0 | 5 | 1 |
| Case 25 | 12 | 127,546,361 | 127,785,576 | 6 | 0 | 6 | 1 |
| Case 25 | 12 | 127,789,406 | 127,933,756 | 7 | 0 | 7 | 1 |
| Case 25 | 12 | 127,941,192 | 131,076,873 | 3 | 0 | 3 | 1 |
| Case 25 | 12 | 131,080,946 | 132,335,592 | 4 | 0 | 4 | 1 |
| Case 25 | 12 | 132,335,602 | 133,503,425 | 3 | 0 | 3 | 1 |
| Case 25 | 12 | 133,503,670 | 133,810,935 | 4 | 0 | 4 | 1 |
| Case 25 | 13 | 19,058,717  | 21,728,755  | 2 | 2 | 4 | 0 |

|         |    |             |             |   |   |   |   |
|---------|----|-------------|-------------|---|---|---|---|
| Case 25 | 13 | 21,728,945  | 21,751,342  | 2 | 1 | 3 | 0 |
| Case 25 | 13 | 21,751,360  | 26,242,069  | 2 | 2 | 4 | 0 |
| Case 25 | 13 | 26,246,272  | 67,663,867  | 4 | 1 | 5 | 0 |
| Case 25 | 13 | 67,671,662  | 67,781,228  | 3 | 2 | 5 | 0 |
| Case 25 | 13 | 67,784,330  | 81,702,688  | 3 | 3 | 6 | 0 |
| Case 25 | 13 | 81,712,872  | 81,716,268  | 3 | 1 | 4 | 0 |
| Case 25 | 13 | 81,718,096  | 95,116,353  | 4 | 1 | 5 | 0 |
| Case 25 | 13 | 95,117,926  | 95,926,431  | 3 | 2 | 5 | 0 |
| Case 25 | 13 | 95,927,052  | 95,975,185  | 3 | 1 | 4 | 0 |
| Case 25 | 13 | 95,976,929  | 109,135,530 | 4 | 1 | 5 | 0 |
| Case 25 | 13 | 109,144,126 | 111,145,921 | 3 | 2 | 5 | 0 |
| Case 25 | 13 | 111,146,009 | 111,683,466 | 3 | 1 | 4 | 0 |
| Case 25 | 13 | 111,684,162 | 111,997,439 | 4 | 1 | 5 | 0 |
| Case 25 | 13 | 111,998,480 | 115,027,516 | 3 | 1 | 4 | 0 |
| Case 25 | 13 | 115,028,428 | 115,103,529 | 4 | 1 | 5 | 0 |
| Case 25 | 14 | 19,280,733  | 20,404,671  | 4 | 0 | 4 | 1 |
| Case 25 | 14 | 20,404,736  | 20,764,585  | 5 | 0 | 5 | 1 |
| Case 25 | 14 | 20,767,556  | 21,046,812  | 4 | 0 | 4 | 1 |
| Case 25 | 14 | 21,049,559  | 21,250,196  | 5 | 0 | 5 | 1 |
| Case 25 | 14 | 21,250,676  | 22,126,995  | 4 | 0 | 4 | 1 |
| Case 25 | 14 | 22,130,428  | 22,488,581  | 5 | 0 | 5 | 1 |
| Case 25 | 14 | 22,491,072  | 22,957,900  | 6 | 0 | 6 | 1 |
| Case 25 | 14 | 22,959,592  | 23,123,431  | 5 | 0 | 5 | 1 |
| Case 25 | 14 | 23,123,915  | 25,172,456  | 4 | 0 | 4 | 1 |
| Case 25 | 14 | 25,182,686  | 29,625,584  | 5 | 0 | 5 | 1 |
| Case 25 | 14 | 29,628,625  | 30,215,051  | 4 | 0 | 4 | 1 |
| Case 25 | 14 | 30,230,638  | 31,276,114  | 5 | 0 | 5 | 1 |
| Case 25 | 14 | 31,280,965  | 32,048,488  | 4 | 0 | 4 | 1 |
| Case 25 | 14 | 32,055,549  | 34,200,151  | 5 | 0 | 5 | 1 |
| Case 25 | 14 | 34,203,338  | 36,382,801  | 4 | 0 | 4 | 1 |
| Case 25 | 14 | 36,387,728  | 36,761,065  | 5 | 0 | 5 | 1 |
| Case 25 | 14 | 36,766,599  | 37,133,206  | 4 | 0 | 4 | 1 |
| Case 25 | 14 | 37,135,732  | 37,190,198  | 2 | 0 | 2 | 1 |
| Case 25 | 14 | 37,194,785  | 37,319,638  | 4 | 0 | 4 | 1 |
| Case 25 | 14 | 37,319,744  | 37,785,560  | 5 | 0 | 5 | 1 |
| Case 25 | 14 | 37,803,019  | 49,486,689  | 4 | 0 | 4 | 1 |
| Case 25 | 14 | 49,488,542  | 49,626,556  | 5 | 0 | 5 | 1 |
| Case 25 | 14 | 49,633,460  | 80,432,157  | 4 | 0 | 4 | 1 |
| Case 25 | 14 | 80,433,854  | 80,792,090  | 5 | 0 | 5 | 1 |
| Case 25 | 14 | 80,792,909  | 86,764,849  | 4 | 0 | 4 | 1 |
| Case 25 | 14 | 86,774,395  | 86,927,870  | 5 | 0 | 5 | 1 |
| Case 25 | 14 | 86,928,890  | 105,052,846 | 4 | 0 | 4 | 1 |
| Case 25 | 14 | 105,054,085 | 105,989,599 | 3 | 0 | 3 | 1 |
| Case 25 | 14 | 105,992,183 | 107,287,663 | 4 | 0 | 4 | 1 |
| Case 25 | 15 | 20,034,919  | 22,427,966  | 3 | 1 | 4 | 0 |
| Case 25 | 15 | 22,652,330  | 25,946,781  | 4 | 1 | 5 | 0 |
| Case 25 | 15 | 25,947,095  | 28,544,359  | 5 | 1 | 6 | 0 |
| Case 25 | 15 | 28,962,131  | 29,217,062  | 2 | 1 | 3 | 0 |
| Case 25 | 15 | 29,225,885  | 40,631,038  | 2 | 2 | 4 | 0 |
| Case 25 | 15 | 40,631,757  | 41,105,658  | 2 | 1 | 3 | 0 |
| Case 25 | 15 | 41,105,926  | 41,250,143  | 2 | 2 | 4 | 0 |
| Case 25 | 15 | 41,256,766  | 41,817,313  | 2 | 1 | 3 | 0 |
| Case 25 | 15 | 41,818,917  | 42,144,039  | 2 | 2 | 4 | 0 |
| Case 25 | 15 | 42,144,400  | 42,185,482  | 2 | 1 | 3 | 0 |
| Case 25 | 15 | 42,190,069  | 42,418,085  | 2 | 2 | 4 | 0 |
| Case 25 | 15 | 42,423,090  | 42,434,254  | 2 | 0 | 2 | 1 |
| Case 25 | 15 | 42,434,273  | 42,800,767  | 2 | 2 | 4 | 0 |
| Case 25 | 15 | 42,804,092  | 42,950,297  | 2 | 1 | 3 | 0 |
| Case 25 | 15 | 42,953,372  | 44,295,257  | 2 | 2 | 4 | 0 |
| Case 25 | 15 | 44,301,291  | 44,855,395  | 2 | 1 | 3 | 0 |
| Case 25 | 15 | 44,855,490  | 45,312,309  | 2 | 2 | 4 | 0 |

|         |    |            |             |   |   |   |   |
|---------|----|------------|-------------|---|---|---|---|
| Case 25 | 15 | 45,314,764 | 85,880,568  | 2 | 1 | 3 | 0 |
| Case 25 | 15 | 85,903,051 | 88,519,216  | 5 | 1 | 6 | 0 |
| Case 25 | 15 | 88,520,291 | 91,561,182  | 4 | 1 | 5 | 0 |
| Case 25 | 15 | 91,562,005 | 95,378,243  | 5 | 1 | 6 | 0 |
| Case 25 | 15 | 95,379,491 | 95,407,056  | 4 | 1 | 5 | 0 |
| Case 25 | 15 | 95,411,105 | 96,124,446  | 3 | 2 | 5 | 0 |
| Case 25 | 15 | 96,126,048 | 102,461,162 | 2 | 1 | 3 | 0 |
| Case 25 | 16 | 88,165     | 1,943,418   | 3 | 1 | 4 | 0 |
| Case 25 | 16 | 1,946,062  | 2,331,173   | 2 | 1 | 3 | 0 |
| Case 25 | 16 | 2,331,174  | 2,369,821   | 2 | 2 | 4 | 0 |
| Case 25 | 16 | 2,374,406  | 2,716,142   | 2 | 1 | 3 | 0 |
| Case 25 | 16 | 2,718,424  | 3,063,709   | 2 | 2 | 4 | 0 |
| Case 25 | 16 | 3,064,164  | 5,667,393   | 3 | 1 | 4 | 0 |
| Case 25 | 16 | 5,668,917  | 6,111,257   | 3 | 2 | 5 | 0 |
| Case 25 | 16 | 6,114,071  | 6,208,143   | 3 | 1 | 4 | 0 |
| Case 25 | 16 | 6,208,689  | 8,722,629   | 3 | 2 | 5 | 0 |
| Case 25 | 16 | 8,722,772  | 9,470,620   | 3 | 1 | 4 | 0 |
| Case 25 | 16 | 9,470,887  | 10,337,494  | 3 | 2 | 5 | 0 |
| Case 25 | 16 | 10,341,141 | 12,960,117  | 3 | 1 | 4 | 0 |
| Case 25 | 16 | 12,960,710 | 14,319,884  | 3 | 2 | 5 | 0 |
| Case 25 | 16 | 14,328,066 | 17,125,816  | 3 | 1 | 4 | 0 |
| Case 25 | 16 | 17,127,208 | 17,441,905  | 3 | 2 | 5 | 0 |
| Case 25 | 16 | 17,443,547 | 20,231,496  | 3 | 1 | 4 | 0 |
| Case 25 | 16 | 20,232,265 | 21,063,947  | 3 | 2 | 5 | 0 |
| Case 25 | 16 | 21,064,384 | 22,257,277  | 3 | 1 | 4 | 0 |
| Case 25 | 16 | 22,262,013 | 23,313,219  | 3 | 2 | 5 | 0 |
| Case 25 | 16 | 23,314,851 | 23,783,288  | 3 | 1 | 4 | 0 |
| Case 25 | 16 | 23,784,131 | 27,214,224  | 3 | 2 | 5 | 0 |
| Case 25 | 16 | 27,214,458 | 35,285,582  | 3 | 1 | 4 | 0 |
| Case 25 | 16 | 46,450,037 | 46,726,233  | 3 | 1 | 4 | 0 |
| Case 25 | 16 | 46,726,420 | 49,658,524  | 3 | 2 | 5 | 0 |
| Case 25 | 16 | 49,659,681 | 50,750,842  | 3 | 1 | 4 | 0 |
| Case 25 | 16 | 50,752,815 | 56,601,722  | 3 | 2 | 5 | 0 |
| Case 25 | 16 | 56,602,798 | 58,752,137  | 3 | 1 | 4 | 0 |
| Case 25 | 16 | 58,752,439 | 66,432,423  | 3 | 2 | 5 | 0 |
| Case 25 | 16 | 66,432,463 | 70,731,328  | 3 | 1 | 4 | 0 |
| Case 25 | 16 | 70,732,653 | 71,591,934  | 3 | 2 | 5 | 0 |
| Case 25 | 16 | 71,598,738 | 71,862,133  | 3 | 1 | 4 | 0 |
| Case 25 | 16 | 71,868,168 | 74,635,632  | 3 | 2 | 5 | 0 |
| Case 25 | 16 | 74,640,386 | 75,344,476  | 3 | 1 | 4 | 0 |
| Case 25 | 16 | 75,358,207 | 78,533,986  | 3 | 2 | 5 | 0 |
| Case 25 | 16 | 78,536,697 | 78,661,327  | 2 | 2 | 4 | 0 |
| Case 25 | 16 | 78,663,258 | 81,010,842  | 3 | 2 | 5 | 0 |
| Case 25 | 16 | 81,010,946 | 81,298,341  | 3 | 1 | 4 | 0 |
| Case 25 | 16 | 81,301,571 | 83,782,517  | 3 | 2 | 5 | 0 |
| Case 25 | 16 | 83,782,622 | 84,030,289  | 3 | 1 | 4 | 0 |
| Case 25 | 16 | 84,030,340 | 84,061,798  | 3 | 2 | 5 | 0 |
| Case 25 | 16 | 84,063,111 | 84,539,738  | 3 | 1 | 4 | 0 |
| Case 25 | 16 | 84,542,415 | 84,606,992  | 3 | 2 | 5 | 0 |
| Case 25 | 16 | 84,607,023 | 86,264,858  | 3 | 1 | 4 | 0 |
| Case 25 | 16 | 86,266,538 | 86,373,330  | 3 | 2 | 5 | 0 |
| Case 25 | 16 | 86,373,618 | 90,274,695  | 3 | 1 | 4 | 0 |
| Case 25 | 17 | 11,885     | 1,538,110   | 3 | 0 | 3 | 1 |
| Case 25 | 17 | 1,538,172  | 1,564,292   | 2 | 0 | 2 | 1 |
| Case 25 | 17 | 1,567,689  | 22,242,355  | 3 | 0 | 3 | 1 |
| Case 25 | 17 | 25,268,142 | 25,268,142  | 3 | 0 | 3 | 1 |
| Case 25 | 17 | 25,295,032 | 29,109,663  | 4 | 0 | 4 | 1 |
| Case 25 | 17 | 29,111,368 | 29,170,962  | 3 | 0 | 3 | 1 |
| Case 25 | 17 | 29,171,026 | 29,326,155  | 4 | 0 | 4 | 1 |
| Case 25 | 17 | 29,326,501 | 29,784,258  | 5 | 0 | 5 | 1 |
| Case 25 | 17 | 29,785,120 | 37,949,924  | 4 | 0 | 4 | 1 |

|         |    |            |            |   |   |   |   |
|---------|----|------------|------------|---|---|---|---|
| Case 25 | 17 | 37,961,820 | 38,405,037 | 3 | 0 | 3 | 1 |
| Case 25 | 17 | 38,406,907 | 39,777,047 | 4 | 0 | 4 | 1 |
| Case 25 | 17 | 39,777,128 | 41,570,071 | 3 | 0 | 3 | 1 |
| Case 25 | 17 | 41,570,078 | 42,152,103 | 4 | 0 | 4 | 1 |
| Case 25 | 17 | 42,152,128 | 43,487,968 | 3 | 0 | 3 | 1 |
| Case 25 | 17 | 43,493,101 | 56,708,979 | 4 | 0 | 4 | 1 |
| Case 25 | 17 | 56,709,117 | 57,141,768 | 3 | 0 | 3 | 1 |
| Case 25 | 17 | 57,148,991 | 58,521,553 | 4 | 0 | 4 | 1 |
| Case 25 | 17 | 58,523,761 | 59,034,422 | 3 | 0 | 3 | 1 |
| Case 25 | 17 | 59,047,388 | 61,722,142 | 4 | 0 | 4 | 1 |
| Case 25 | 17 | 61,724,695 | 61,895,604 | 3 | 0 | 3 | 1 |
| Case 25 | 17 | 61,896,004 | 65,691,382 | 4 | 0 | 4 | 1 |
| Case 25 | 17 | 65,696,275 | 66,253,003 | 3 | 0 | 3 | 1 |
| Case 25 | 17 | 66,253,019 | 71,164,376 | 4 | 0 | 4 | 1 |
| Case 25 | 17 | 71,165,470 | 71,232,628 | 3 | 0 | 3 | 1 |
| Case 25 | 17 | 71,232,631 | 72,078,154 | 4 | 0 | 4 | 1 |
| Case 25 | 17 | 72,078,211 | 75,507,296 | 3 | 0 | 3 | 1 |
| Case 25 | 17 | 75,517,683 | 76,072,444 | 4 | 0 | 4 | 1 |
| Case 25 | 17 | 76,074,196 | 76,511,943 | 3 | 0 | 3 | 1 |
| Case 25 | 17 | 76,515,720 | 76,799,534 | 4 | 0 | 4 | 1 |
| Case 25 | 17 | 76,799,617 | 81,060,040 | 3 | 0 | 3 | 1 |
| Case 25 | 18 | 87,505     | 677,214    | 3 | 1 | 4 | 0 |
| Case 25 | 18 | 677,240    | 3,171,224  | 4 | 1 | 5 | 0 |
| Case 25 | 18 | 3,171,473  | 3,488,151  | 3 | 1 | 4 | 0 |
| Case 25 | 18 | 3,492,243  | 5,622,363  | 4 | 1 | 5 | 0 |
| Case 25 | 18 | 5,632,288  | 6,581,717  | 3 | 2 | 5 | 0 |
| Case 25 | 18 | 6,581,851  | 7,515,949  | 3 | 1 | 4 | 0 |
| Case 25 | 18 | 7,516,346  | 9,733,237  | 3 | 2 | 5 | 0 |
| Case 25 | 18 | 9,735,619  | 9,984,478  | 3 | 1 | 4 | 0 |
| Case 25 | 18 | 9,986,354  | 10,322,644 | 3 | 2 | 5 | 0 |
| Case 25 | 18 | 10,323,364 | 10,949,093 | 3 | 1 | 4 | 0 |
| Case 25 | 18 | 10,950,758 | 11,884,937 | 4 | 1 | 5 | 0 |
| Case 25 | 18 | 11,885,553 | 14,110,916 | 3 | 1 | 4 | 0 |
| Case 25 | 18 | 14,120,391 | 15,375,878 | 4 | 1 | 5 | 0 |
| Case 25 | 18 | 18,520,354 | 18,621,273 | 1 | 0 | 1 | 0 |
| Case 25 | 18 | 18,655,451 | 19,294,674 | 3 | 1 | 4 | 0 |
| Case 25 | 18 | 19,312,766 | 20,936,558 | 6 | 1 | 7 | 0 |
| Case 25 | 18 | 20,936,576 | 21,152,116 | 5 | 1 | 6 | 0 |
| Case 25 | 18 | 21,153,416 | 21,406,679 | 5 | 2 | 7 | 0 |
| Case 25 | 18 | 21,407,372 | 21,479,357 | 5 | 1 | 6 | 0 |
| Case 25 | 18 | 21,481,208 | 21,801,732 | 4 | 2 | 6 | 0 |
| Case 25 | 18 | 21,805,039 | 21,808,415 | 4 | 0 | 4 | 1 |
| Case 25 | 18 | 21,811,795 | 23,847,561 | 3 | 0 | 3 | 1 |
| Case 25 | 18 | 23,849,492 | 23,898,771 | 2 | 0 | 2 | 1 |
| Case 25 | 18 | 23,901,159 | 29,426,774 | 3 | 0 | 3 | 1 |
| Case 25 | 18 | 29,429,596 | 29,511,423 | 2 | 0 | 2 | 1 |
| Case 25 | 18 | 29,527,884 | 30,755,662 | 3 | 0 | 3 | 1 |
| Case 25 | 18 | 30,760,966 | 30,929,223 | 2 | 0 | 2 | 1 |
| Case 25 | 18 | 30,941,974 | 31,251,740 | 3 | 0 | 3 | 1 |
| Case 25 | 18 | 31,263,320 | 34,790,416 | 5 | 0 | 5 | 1 |
| Case 25 | 18 | 34,801,866 | 35,701,204 | 4 | 1 | 5 | 0 |
| Case 25 | 18 | 35,708,096 | 38,120,769 | 5 | 1 | 6 | 0 |
| Case 25 | 18 | 38,130,502 | 39,724,275 | 5 | 0 | 5 | 1 |
| Case 25 | 18 | 39,731,208 | 41,984,948 | 3 | 0 | 3 | 1 |
| Case 25 | 18 | 42,004,083 | 43,329,864 | 4 | 0 | 4 | 1 |
| Case 25 | 18 | 43,330,148 | 43,833,689 | 3 | 0 | 3 | 1 |
| Case 25 | 18 | 43,834,634 | 47,840,706 | 4 | 0 | 4 | 1 |
| Case 25 | 18 | 47,841,892 | 47,907,448 | 3 | 0 | 3 | 1 |
| Case 25 | 18 | 47,908,542 | 51,795,329 | 4 | 0 | 4 | 1 |
| Case 25 | 18 | 51,795,960 | 51,820,035 | 3 | 0 | 3 | 1 |
| Case 25 | 18 | 51,820,070 | 55,252,613 | 4 | 0 | 4 | 1 |

|         |    |            |            |   |   |   |   |
|---------|----|------------|------------|---|---|---|---|
| Case 25 | 18 | 55,257,063 | 55,315,751 | 3 | 0 | 3 | 1 |
| Case 25 | 18 | 55,315,959 | 74,363,062 | 4 | 0 | 4 | 1 |
| Case 25 | 18 | 74,366,206 | 74,622,617 | 3 | 0 | 3 | 1 |
| Case 25 | 18 | 74,622,634 | 75,954,881 | 4 | 0 | 4 | 1 |
| Case 25 | 18 | 75,959,126 | 77,208,837 | 3 | 0 | 3 | 1 |
| Case 25 | 18 | 77,208,952 | 77,475,256 | 4 | 0 | 4 | 1 |
| Case 25 | 18 | 77,477,536 | 78,015,180 | 3 | 0 | 3 | 1 |
| Case 25 | 19 | 260,912    | 9,066,140  | 3 | 0 | 3 | 1 |
| Case 25 | 19 | 9,066,259  | 9,090,822  | 4 | 0 | 4 | 1 |
| Case 25 | 19 | 9,090,850  | 15,131,668 | 3 | 0 | 3 | 1 |
| Case 25 | 19 | 15,132,545 | 15,205,503 | 4 | 0 | 4 | 1 |
| Case 25 | 19 | 15,206,661 | 15,839,459 | 3 | 0 | 3 | 1 |
| Case 25 | 19 | 15,839,496 | 16,071,452 | 4 | 0 | 4 | 1 |
| Case 25 | 19 | 16,072,037 | 22,693,766 | 3 | 0 | 3 | 1 |
| Case 25 | 19 | 22,697,721 | 22,834,360 | 4 | 0 | 4 | 1 |
| Case 25 | 19 | 22,835,939 | 23,943,243 | 3 | 0 | 3 | 1 |
| Case 25 | 19 | 23,958,238 | 24,238,451 | 4 | 0 | 4 | 1 |
| Case 25 | 19 | 24,239,788 | 24,629,285 | 3 | 0 | 3 | 1 |
| Case 25 | 19 | 27,732,159 | 28,243,423 | 3 | 0 | 3 | 1 |
| Case 25 | 19 | 28,243,881 | 30,088,147 | 4 | 0 | 4 | 1 |
| Case 25 | 19 | 30,088,293 | 30,577,229 | 3 | 0 | 3 | 1 |
| Case 25 | 19 | 30,580,597 | 33,157,003 | 4 | 0 | 4 | 1 |
| Case 25 | 19 | 33,157,401 | 33,734,633 | 3 | 0 | 3 | 1 |
| Case 25 | 19 | 33,735,880 | 34,670,725 | 4 | 0 | 4 | 1 |
| Case 25 | 19 | 34,676,982 | 34,959,979 | 3 | 0 | 3 | 1 |
| Case 25 | 19 | 34,971,846 | 35,416,794 | 4 | 0 | 4 | 1 |
| Case 25 | 19 | 35,418,092 | 35,551,260 | 3 | 0 | 3 | 1 |
| Case 25 | 19 | 35,551,574 | 35,831,826 | 4 | 0 | 4 | 1 |
| Case 25 | 19 | 35,831,892 | 40,008,118 | 3 | 0 | 3 | 1 |
| Case 25 | 19 | 40,009,100 | 40,363,916 | 4 | 0 | 4 | 1 |
| Case 25 | 19 | 40,363,917 | 41,494,891 | 3 | 0 | 3 | 1 |
| Case 25 | 19 | 41,495,433 | 42,229,176 | 4 | 0 | 4 | 1 |
| Case 25 | 19 | 42,231,159 | 43,092,505 | 3 | 0 | 3 | 1 |
| Case 25 | 19 | 43,092,775 | 43,866,449 | 4 | 0 | 4 | 1 |
| Case 25 | 19 | 43,866,823 | 44,006,342 | 3 | 0 | 3 | 1 |
| Case 25 | 19 | 44,008,370 | 44,270,819 | 4 | 0 | 4 | 1 |
| Case 25 | 19 | 44,271,066 | 44,470,420 | 3 | 0 | 3 | 1 |
| Case 25 | 19 | 44,470,663 | 45,079,808 | 4 | 0 | 4 | 1 |
| Case 25 | 19 | 45,086,346 | 46,621,464 | 3 | 0 | 3 | 1 |
| Case 25 | 19 | 46,622,776 | 46,627,412 | 0 | 0 | 0 | 0 |
| Case 25 | 19 | 46,636,139 | 51,871,734 | 3 | 0 | 3 | 1 |
| Case 25 | 19 | 51,871,737 | 52,496,263 | 4 | 0 | 4 | 1 |
| Case 25 | 19 | 52,496,273 | 53,769,741 | 3 | 0 | 3 | 1 |
| Case 25 | 19 | 53,769,861 | 53,820,000 | 4 | 0 | 4 | 1 |
| Case 25 | 19 | 53,822,594 | 56,527,345 | 3 | 0 | 3 | 1 |
| Case 25 | 19 | 56,531,625 | 56,572,844 | 4 | 0 | 4 | 1 |
| Case 25 | 19 | 56,573,254 | 56,689,969 | 3 | 0 | 3 | 1 |
| Case 25 | 19 | 56,691,571 | 56,915,219 | 4 | 0 | 4 | 1 |
| Case 25 | 19 | 56,918,598 | 57,089,949 | 3 | 0 | 3 | 1 |
| Case 25 | 19 | 57,092,369 | 57,532,552 | 4 | 0 | 4 | 1 |
| Case 25 | 19 | 57,535,252 | 58,050,006 | 3 | 0 | 3 | 1 |
| Case 25 | 19 | 58,050,032 | 58,116,143 | 4 | 0 | 4 | 1 |
| Case 25 | 19 | 58,117,083 | 59,097,160 | 3 | 0 | 3 | 1 |
| Case 25 | 20 | 63,244     | 257,032    | 2 | 2 | 4 | 0 |
| Case 25 | 20 | 257,899    | 858,841    | 2 | 1 | 3 | 0 |
| Case 25 | 20 | 860,442    | 934,500    | 2 | 2 | 4 | 0 |
| Case 25 | 20 | 934,617    | 999,752    | 2 | 1 | 3 | 0 |
| Case 25 | 20 | 999,784    | 2,380,225  | 2 | 2 | 4 | 0 |
| Case 25 | 20 | 2,380,289  | 2,478,592  | 2 | 1 | 3 | 0 |
| Case 25 | 20 | 2,478,707  | 2,597,906  | 2 | 2 | 4 | 0 |
| Case 25 | 20 | 2,597,978  | 4,081,175  | 2 | 1 | 3 | 0 |



|         |    |            |            |   |   |   |   |
|---------|----|------------|------------|---|---|---|---|
| Case 25 | 20 | 4,087,050  | 4,171,497  | 2 | 2 | 4 | 0 |
| Case 25 | 20 | 4,172,258  | 6,510,902  | 2 | 1 | 3 | 0 |
| Case 25 | 20 | 6,526,125  | 6,854,187  | 2 | 2 | 4 | 0 |
| Case 25 | 20 | 6,857,854  | 7,625,122  | 3 | 2 | 5 | 0 |
| Case 25 | 20 | 7,625,506  | 7,625,506  | 3 | 1 | 4 | 0 |
| Case 25 | 20 | 7,627,294  | 7,627,294  | 6 | 1 | 7 | 0 |
| Case 25 | 20 | 7,632,355  | 15,797,818 | 4 | 2 | 6 | 0 |
| Case 25 | 20 | 15,802,635 | 15,833,245 | 3 | 2 | 5 | 0 |
| Case 25 | 20 | 15,835,730 | 15,990,705 | 2 | 2 | 4 | 0 |
| Case 25 | 20 | 15,991,007 | 17,043,343 | 3 | 2 | 5 | 0 |
| Case 25 | 20 | 17,045,926 | 20,591,395 | 2 | 2 | 4 | 0 |
| Case 25 | 20 | 20,591,968 | 20,660,549 | 2 | 0 | 2 | 1 |
| Case 25 | 20 | 20,664,761 | 21,145,885 | 3 | 0 | 3 | 1 |
| Case 25 | 20 | 21,172,075 | 21,428,685 | 2 | 0 | 2 | 1 |
| Case 25 | 20 | 21,447,889 | 23,026,271 | 3 | 0 | 3 | 1 |
| Case 25 | 20 | 23,026,496 | 23,048,733 | 2 | 0 | 2 | 1 |
| Case 25 | 20 | 23,052,614 | 23,433,349 | 3 | 0 | 3 | 1 |
| Case 25 | 20 | 23,433,441 | 23,749,714 | 2 | 0 | 2 | 1 |
| Case 25 | 20 | 23,750,897 | 23,823,856 | 3 | 0 | 3 | 1 |
| Case 25 | 20 | 23,844,813 | 23,952,699 | 2 | 0 | 2 | 1 |
| Case 25 | 20 | 23,955,742 | 25,031,403 | 3 | 0 | 3 | 1 |
| Case 25 | 20 | 25,032,075 | 26,293,985 | 2 | 0 | 2 | 1 |
| Case 25 | 20 | 29,425,357 | 33,025,567 | 5 | 0 | 5 | 1 |
| Case 25 | 20 | 33,026,003 | 34,654,944 | 4 | 3 | 7 | 0 |
| Case 25 | 20 | 34,672,509 | 36,774,502 | 5 | 0 | 5 | 1 |
| Case 25 | 20 | 36,776,379 | 36,845,738 | 6 | 0 | 6 | 1 |
| Case 25 | 20 | 36,846,731 | 37,356,971 | 5 | 0 | 5 | 1 |
| Case 25 | 20 | 37,357,266 | 41,966,001 | 6 | 0 | 6 | 1 |
| Case 25 | 20 | 41,972,591 | 43,271,579 | 5 | 0 | 5 | 1 |
| Case 25 | 20 | 43,273,635 | 44,279,034 | 6 | 0 | 6 | 1 |
| Case 25 | 20 | 44,279,200 | 45,119,670 | 5 | 0 | 5 | 1 |
| Case 25 | 20 | 45,121,949 | 45,769,206 | 6 | 0 | 6 | 1 |
| Case 25 | 20 | 45,770,401 | 46,514,097 | 5 | 0 | 5 | 1 |
| Case 25 | 20 | 46,516,716 | 46,962,780 | 6 | 0 | 6 | 1 |
| Case 25 | 20 | 46,965,462 | 47,274,697 | 5 | 0 | 5 | 1 |
| Case 25 | 20 | 47,274,733 | 47,772,575 | 6 | 0 | 6 | 1 |
| Case 25 | 20 | 47,778,602 | 47,990,236 | 5 | 0 | 5 | 1 |
| Case 25 | 20 | 47,990,250 | 48,409,404 | 6 | 0 | 6 | 1 |
| Case 25 | 20 | 48,410,403 | 49,581,710 | 5 | 0 | 5 | 1 |
| Case 25 | 20 | 49,585,432 | 50,220,677 | 6 | 0 | 6 | 1 |
| Case 25 | 20 | 50,221,553 | 50,506,749 | 5 | 0 | 5 | 1 |
| Case 25 | 20 | 50,510,649 | 54,941,087 | 6 | 0 | 6 | 1 |
| Case 25 | 20 | 54,941,140 | 55,421,778 | 5 | 0 | 5 | 1 |
| Case 25 | 20 | 55,421,856 | 57,326,489 | 6 | 0 | 6 | 1 |
| Case 25 | 20 | 57,326,876 | 57,599,824 | 5 | 0 | 5 | 1 |
| Case 25 | 20 | 57,601,995 | 59,881,271 | 6 | 0 | 6 | 1 |
| Case 25 | 20 | 59,881,933 | 62,948,788 | 5 | 0 | 5 | 1 |
| Case 25 | 21 | 10,827,533 | 10,971,337 | 3 | 0 | 3 | 1 |
| Case 25 | 21 | 14,368,320 | 14,368,320 | 3 | 0 | 3 | 1 |
| Case 25 | 21 | 14,613,203 | 14,704,303 | 0 | 0 | 0 | 0 |
| Case 25 | 21 | 14,736,777 | 15,154,158 | 2 | 0 | 2 | 1 |
| Case 25 | 21 | 15,165,769 | 15,618,081 | 0 | 0 | 0 | 0 |
| Case 25 | 21 | 15,620,391 | 15,648,485 | 1 | 0 | 1 | 0 |
| Case 25 | 21 | 15,649,319 | 15,850,292 | 0 | 0 | 0 | 0 |
| Case 25 | 21 | 15,852,100 | 15,858,321 | 1 | 0 | 1 | 0 |
| Case 25 | 21 | 15,858,411 | 15,984,982 | 0 | 0 | 0 | 0 |
| Case 25 | 21 | 16,000,148 | 16,238,790 | 1 | 0 | 1 | 0 |
| Case 25 | 21 | 16,239,937 | 16,335,989 | 0 | 0 | 0 | 0 |
| Case 25 | 21 | 16,336,804 | 16,339,780 | 1 | 0 | 1 | 0 |
| Case 25 | 21 | 16,339,797 | 16,851,122 | 0 | 0 | 0 | 0 |
| Case 25 | 21 | 16,852,402 | 16,884,154 | 1 | 0 | 1 | 0 |

|         |    |            |            |   |   |   |   |
|---------|----|------------|------------|---|---|---|---|
| Case 25 | 21 | 16,889,897 | 17,661,418 | 0 | 0 | 0 | 0 |
| Case 25 | 21 | 17,664,676 | 18,781,682 | 1 | 0 | 1 | 0 |
| Case 25 | 21 | 18,785,657 | 18,825,200 | 2 | 0 | 2 | 1 |
| Case 25 | 21 | 18,825,247 | 18,830,252 | 0 | 0 | 0 | 0 |
| Case 25 | 21 | 18,830,470 | 18,937,978 | 2 | 0 | 2 | 1 |
| Case 25 | 21 | 18,938,080 | 19,055,530 | 1 | 0 | 1 | 0 |
| Case 25 | 21 | 19,055,599 | 19,149,273 | 2 | 0 | 2 | 1 |
| Case 25 | 21 | 19,150,133 | 19,723,055 | 1 | 0 | 1 | 0 |
| Case 25 | 21 | 19,723,501 | 19,726,136 | 0 | 0 | 0 | 0 |
| Case 25 | 21 | 19,726,138 | 20,342,268 | 1 | 0 | 1 | 0 |
| Case 25 | 21 | 20,342,832 | 20,371,429 | 2 | 0 | 2 | 1 |
| Case 25 | 21 | 20,374,159 | 21,336,088 | 1 | 0 | 1 | 0 |
| Case 25 | 21 | 21,350,133 | 21,350,133 | 3 | 1 | 4 | 0 |
| Case 25 | 21 | 21,350,740 | 22,609,204 | 6 | 1 | 7 | 0 |
| Case 25 | 21 | 22,614,964 | 26,844,655 | 5 | 1 | 6 | 0 |
| Case 25 | 21 | 26,855,088 | 32,252,137 | 2 | 1 | 3 | 0 |
| Case 25 | 21 | 32,253,365 | 34,238,639 | 3 | 1 | 4 | 0 |
| Case 25 | 21 | 34,240,068 | 34,506,306 | 4 | 1 | 5 | 0 |
| Case 25 | 21 | 34,509,155 | 35,153,814 | 3 | 1 | 4 | 0 |
| Case 25 | 21 | 35,154,307 | 35,716,371 | 4 | 1 | 5 | 0 |
| Case 25 | 21 | 35,721,560 | 36,125,597 | 3 | 1 | 4 | 0 |
| Case 25 | 21 | 36,126,639 | 37,002,204 | 4 | 1 | 5 | 0 |
| Case 25 | 21 | 37,004,989 | 37,484,942 | 4 | 0 | 4 | 1 |
| Case 25 | 21 | 37,485,062 | 37,836,711 | 3 | 0 | 3 | 1 |
| Case 25 | 21 | 37,837,930 | 42,721,784 | 4 | 0 | 4 | 1 |
| Case 25 | 21 | 42,725,380 | 42,768,297 | 3 | 0 | 3 | 1 |
| Case 25 | 21 | 42,769,619 | 42,876,447 | 4 | 0 | 4 | 1 |
| Case 25 | 21 | 42,882,003 | 43,543,193 | 2 | 0 | 2 | 1 |
| Case 25 | 21 | 43,543,261 | 43,619,665 | 3 | 0 | 3 | 1 |
| Case 25 | 21 | 43,620,158 | 44,755,474 | 2 | 0 | 2 | 1 |
| Case 25 | 21 | 44,761,874 | 44,833,854 | 4 | 0 | 4 | 1 |
| Case 25 | 21 | 44,835,301 | 45,149,133 | 3 | 0 | 3 | 1 |
| Case 25 | 21 | 45,151,874 | 45,398,853 | 4 | 0 | 4 | 1 |
| Case 25 | 21 | 45,400,781 | 47,970,643 | 3 | 0 | 3 | 1 |
| Case 25 | 21 | 47,971,556 | 47,974,202 | 2 | 0 | 2 | 1 |
| Case 25 | 21 | 47,976,322 | 47,980,760 | 0 | 0 | 0 | 0 |
| Case 25 | 21 | 47,982,363 | 47,987,984 | 1 | 0 | 1 | 0 |
| Case 25 | 21 | 47,988,142 | 48,021,054 | 0 | 0 | 0 | 0 |
| Case 25 | 21 | 48,021,655 | 48,050,388 | 1 | 0 | 1 | 0 |
| Case 25 | 21 | 48,052,169 | 48,063,476 | 0 | 0 | 0 | 0 |
| Case 25 | 21 | 48,064,382 | 48,100,155 | 1 | 0 | 1 | 0 |
| Case 25 | 22 | 16,114,244 | 17,073,119 | 2 | 1 | 3 | 0 |
| Case 25 | 22 | 17,073,134 | 17,582,916 | 2 | 2 | 4 | 0 |
| Case 25 | 22 | 17,583,083 | 17,590,607 | 2 | 1 | 3 | 0 |
| Case 25 | 22 | 17,590,744 | 17,931,483 | 2 | 2 | 4 | 0 |
| Case 25 | 22 | 17,932,686 | 18,226,771 | 2 | 1 | 3 | 0 |
| Case 25 | 22 | 18,229,187 | 19,197,988 | 2 | 2 | 4 | 0 |
| Case 25 | 22 | 19,198,017 | 22,550,078 | 2 | 1 | 3 | 0 |
| Case 25 | 22 | 22,550,884 | 23,644,677 | 2 | 2 | 4 | 0 |
| Case 25 | 22 | 23,644,794 | 23,927,134 | 2 | 1 | 3 | 0 |
| Case 25 | 22 | 23,930,279 | 24,034,288 | 2 | 2 | 4 | 0 |
| Case 25 | 22 | 24,034,304 | 24,226,890 | 2 | 1 | 3 | 0 |
| Case 25 | 22 | 24,226,950 | 24,463,996 | 2 | 2 | 4 | 0 |
| Case 25 | 22 | 24,464,377 | 24,723,644 | 2 | 1 | 3 | 0 |
| Case 25 | 22 | 24,724,816 | 24,908,352 | 2 | 2 | 4 | 0 |
| Case 25 | 22 | 24,908,829 | 24,992,266 | 2 | 1 | 3 | 0 |
| Case 25 | 22 | 24,996,630 | 25,109,027 | 2 | 2 | 4 | 0 |
| Case 25 | 22 | 25,112,325 | 25,548,986 | 2 | 1 | 3 | 0 |
| Case 25 | 22 | 25,556,577 | 26,859,942 | 2 | 2 | 4 | 0 |
| Case 25 | 22 | 26,859,956 | 26,891,808 | 2 | 1 | 3 | 0 |
| Case 25 | 22 | 26,894,869 | 29,537,124 | 2 | 2 | 4 | 0 |

|         |    |             |             |   |   |   |   |
|---------|----|-------------|-------------|---|---|---|---|
| Case 25 | 22 | 29,537,940  | 29,737,633  | 2 | 1 | 3 | 0 |
| Case 25 | 22 | 29,737,823  | 30,766,466  | 2 | 2 | 4 | 0 |
| Case 25 | 22 | 30,766,496  | 31,091,324  | 2 | 1 | 3 | 0 |
| Case 25 | 22 | 31,091,347  | 31,839,151  | 2 | 2 | 4 | 0 |
| Case 25 | 22 | 31,840,638  | 32,257,400  | 2 | 1 | 3 | 0 |
| Case 25 | 22 | 32,263,131  | 37,260,104  | 2 | 2 | 4 | 0 |
| Case 25 | 22 | 37,260,160  | 37,752,697  | 2 | 1 | 3 | 0 |
| Case 25 | 22 | 37,753,323  | 37,866,006  | 2 | 2 | 4 | 0 |
| Case 25 | 22 | 37,866,063  | 40,291,139  | 2 | 1 | 3 | 0 |
| Case 25 | 22 | 40,295,286  | 41,163,108  | 2 | 2 | 4 | 0 |
| Case 25 | 22 | 41,166,135  | 42,522,684  | 2 | 1 | 3 | 0 |
| Case 25 | 22 | 42,523,844  | 42,694,220  | 2 | 2 | 4 | 0 |
| Case 25 | 22 | 42,696,005  | 43,614,440  | 2 | 1 | 3 | 0 |
| Case 25 | 22 | 43,614,443  | 44,282,368  | 2 | 2 | 4 | 0 |
| Case 25 | 22 | 44,282,369  | 44,421,425  | 2 | 1 | 3 | 0 |
| Case 25 | 22 | 44,421,563  | 44,668,150  | 2 | 2 | 4 | 0 |
| Case 25 | 22 | 44,672,019  | 44,813,655  | 2 | 1 | 3 | 0 |
| Case 25 | 22 | 44,814,793  | 44,851,458  | 2 | 2 | 4 | 0 |
| Case 25 | 22 | 44,851,821  | 45,848,271  | 2 | 1 | 3 | 0 |
| Case 25 | 22 | 45,853,566  | 46,040,996  | 2 | 2 | 4 | 0 |
| Case 25 | 22 | 46,042,979  | 47,440,669  | 2 | 1 | 3 | 0 |
| Case 25 | 22 | 47,440,736  | 48,845,768  | 2 | 2 | 4 | 0 |
| Case 25 | 22 | 48,850,781  | 48,906,678  | 2 | 1 | 3 | 0 |
| Case 25 | 22 | 48,908,084  | 49,130,787  | 2 | 2 | 4 | 0 |
| Case 25 | 22 | 49,131,192  | 49,511,217  | 2 | 1 | 3 | 0 |
| Case 25 | 22 | 49,511,588  | 50,154,682  | 2 | 2 | 4 | 0 |
| Case 25 | 22 | 50,159,072  | 51,195,728  | 2 | 1 | 3 | 0 |
| Case 26 | 1  | 82,154      | 121,346,616 | 1 | 1 | 2 | 0 |
| Case 26 | 1  | 142,649,718 | 245,634,069 | 1 | 1 | 2 | 0 |
| Case 26 | 1  | 245,634,267 | 245,734,311 | 1 | 0 | 1 | 0 |
| Case 26 | 1  | 245,737,772 | 249,218,992 | 1 | 1 | 2 | 0 |
| Case 26 | 2  | 18,674      | 56,198,401  | 1 | 1 | 2 | 0 |
| Case 26 | 2  | 56,199,062  | 56,480,571  | 1 | 0 | 1 | 0 |
| Case 26 | 2  | 56,489,455  | 92,081,640  | 1 | 1 | 2 | 0 |
| Case 26 | 2  | 95,429,424  | 201,434,903 | 1 | 1 | 2 | 0 |
| Case 26 | 2  | 201,435,818 | 201,438,376 | 1 | 0 | 1 | 0 |
| Case 26 | 2  | 201,438,497 | 235,834,973 | 1 | 1 | 2 | 0 |
| Case 26 | 2  | 235,840,020 | 236,464,232 | 1 | 0 | 1 | 0 |
| Case 26 | 2  | 236,468,798 | 243,048,760 | 1 | 1 | 2 | 0 |
| Case 26 | 3  | 61,495      | 43,810,452  | 1 | 1 | 2 | 0 |
| Case 26 | 3  | 43,822,281  | 44,611,558  | 2 | 1 | 3 | 0 |
| Case 26 | 3  | 44,611,677  | 44,893,288  | 1 | 1 | 2 | 0 |
| Case 26 | 3  | 44,893,346  | 47,618,953  | 2 | 1 | 3 | 0 |
| Case 26 | 3  | 47,619,025  | 60,086,281  | 1 | 1 | 2 | 0 |
| Case 26 | 3  | 60,087,817  | 60,479,380  | 1 | 0 | 1 | 0 |
| Case 26 | 3  | 60,481,459  | 60,563,632  | 1 | 1 | 2 | 0 |
| Case 26 | 3  | 60,566,161  | 60,692,133  | 1 | 0 | 1 | 0 |
| Case 26 | 3  | 60,693,253  | 75,279,989  | 1 | 1 | 2 | 0 |
| Case 26 | 3  | 75,283,711  | 90,442,925  | 2 | 1 | 3 | 0 |
| Case 26 | 3  | 93,537,290  | 117,284,829 | 2 | 1 | 3 | 0 |
| Case 26 | 3  | 117,292,748 | 122,040,062 | 2 | 2 | 4 | 0 |
| Case 26 | 3  | 122,040,283 | 197,838,262 | 2 | 1 | 3 | 0 |
| Case 26 | 4  | 71,566      | 504,012     | 1 | 0 | 1 | 0 |
| Case 26 | 4  | 509,850     | 49,620,898  | 1 | 1 | 2 | 0 |
| Case 26 | 4  | 52,697,856  | 190,963,766 | 1 | 1 | 2 | 0 |
| Case 26 | 5  | 38,139      | 730,271     | 1 | 1 | 2 | 0 |
| Case 26 | 5  | 788,646     | 825,338     | 5 | 0 | 5 | 1 |
| Case 26 | 5  | 840,717     | 45,841,630  | 1 | 1 | 2 | 0 |
| Case 26 | 5  | 45,874,923  | 46,399,093  | 0 | 0 | 0 | 0 |
| Case 26 | 5  | 49,457,282  | 49,564,798  | 0 | 0 | 0 | 0 |
| Case 26 | 5  | 49,586,870  | 139,931,613 | 1 | 1 | 2 | 0 |

|         |    |             |             |   |   |   |   |
|---------|----|-------------|-------------|---|---|---|---|
| Case 26 | 5  | 139,931,617 | 139,931,652 | 0 | 0 | 0 | 0 |
| Case 26 | 5  | 139,931,653 | 180,693,127 | 1 | 1 | 2 | 0 |
| Case 26 | 6  | 108,666     | 1,709,703   | 1 | 1 | 2 | 0 |
| Case 26 | 6  | 1,712,223   | 1,915,129   | 1 | 0 | 1 | 0 |
| Case 26 | 6  | 1,918,262   | 30,993,954  | 1 | 1 | 2 | 0 |
| Case 26 | 6  | 30,993,958  | 30,997,667  | 0 | 0 | 0 | 0 |
| Case 26 | 6  | 30,997,767  | 32,498,834  | 1 | 1 | 2 | 0 |
| Case 26 | 6  | 32,501,715  | 32,552,095  | 1 | 0 | 1 | 0 |
| Case 26 | 6  | 32,552,096  | 58,752,089  | 1 | 1 | 2 | 0 |
| Case 26 | 6  | 61,891,118  | 78,965,525  | 1 | 1 | 2 | 0 |
| Case 26 | 6  | 78,972,930  | 79,039,234  | 0 | 0 | 0 | 0 |
| Case 26 | 6  | 79,042,157  | 170,980,171 | 1 | 1 | 2 | 0 |
| Case 26 | 7  | 44,935      | 33,133,742  | 1 | 1 | 2 | 0 |
| Case 26 | 7  | 33,136,109  | 34,791,079  | 1 | 0 | 1 | 0 |
| Case 26 | 7  | 34,791,201  | 38,292,663  | 1 | 1 | 2 | 0 |
| Case 26 | 7  | 38,297,145  | 38,383,243  | 2 | 2 | 4 | 0 |
| Case 26 | 7  | 38,385,938  | 58,019,061  | 1 | 1 | 2 | 0 |
| Case 26 | 7  | 61,056,053  | 61,138,655  | 1 | 1 | 2 | 0 |
| Case 26 | 7  | 61,747,794  | 62,577,770  | 0 | 0 | 0 | 0 |
| Case 26 | 7  | 62,627,173  | 100,675,082 | 1 | 1 | 2 | 0 |
| Case 26 | 7  | 100,675,128 | 100,685,691 | 1 | 0 | 1 | 0 |
| Case 26 | 7  | 100,685,709 | 108,594,196 | 1 | 1 | 2 | 0 |
| Case 26 | 7  | 108,596,014 | 108,641,894 | 5 | 0 | 5 | 1 |
| Case 26 | 7  | 108,644,659 | 159,119,486 | 1 | 1 | 2 | 0 |
| Case 26 | 8  | 164,984     | 198,839     | 1 | 1 | 2 | 0 |
| Case 26 | 8  | 200,898     | 43,791,691  | 2 | 1 | 3 | 0 |
| Case 26 | 8  | 46,886,735  | 48,697,705  | 2 | 1 | 3 | 0 |
| Case 26 | 8  | 48,697,733  | 49,047,878  | 1 | 1 | 2 | 0 |
| Case 26 | 8  | 49,053,165  | 86,016,249  | 2 | 1 | 3 | 0 |
| Case 26 | 8  | 86,018,853  | 86,861,743  | 1 | 1 | 2 | 0 |
| Case 26 | 8  | 86,866,416  | 146,293,414 | 2 | 1 | 3 | 0 |
| Case 26 | 9  | 46,587      | 26,978,157  | 1 | 1 | 2 | 0 |
| Case 26 | 9  | 26,978,170  | 27,066,281  | 1 | 0 | 1 | 0 |
| Case 26 | 9  | 27,074,233  | 46,944,322  | 1 | 1 | 2 | 0 |
| Case 26 | 9  | 65,629,772  | 99,521,123  | 1 | 1 | 2 | 0 |
| Case 26 | 9  | 99,521,136  | 99,525,805  | 0 | 0 | 0 | 0 |
| Case 26 | 9  | 99,537,071  | 141,066,491 | 1 | 1 | 2 | 0 |
| Case 26 | 10 | 98,087      | 39,097,912  | 1 | 1 | 2 | 0 |
| Case 26 | 10 | 42,436,301  | 57,061,057  | 1 | 1 | 2 | 0 |
| Case 26 | 10 | 57,073,531  | 57,128,289  | 0 | 0 | 0 | 0 |
| Case 26 | 10 | 57,135,857  | 135,477,883 | 1 | 1 | 2 | 0 |
| Case 26 | 11 | 193,146     | 51,591,253  | 1 | 1 | 2 | 0 |
| Case 26 | 11 | 54,794,237  | 55,362,955  | 1 | 1 | 2 | 0 |
| Case 26 | 11 | 55,370,325  | 55,427,700  | 0 | 0 | 0 | 0 |
| Case 26 | 11 | 55,431,897  | 134,934,063 | 1 | 1 | 2 | 0 |
| Case 26 | 12 | 191,619     | 34,810,203  | 1 | 1 | 2 | 0 |
| Case 26 | 12 | 34,819,926  | 34,853,011  | 0 | 0 | 0 | 0 |
| Case 26 | 12 | 37,876,400  | 38,359,611  | 0 | 0 | 0 | 0 |
| Case 26 | 12 | 38,416,139  | 85,414,028  | 1 | 1 | 2 | 0 |
| Case 26 | 12 | 85,423,670  | 85,450,243  | 1 | 0 | 1 | 0 |
| Case 26 | 12 | 85,450,291  | 133,482,984 | 1 | 1 | 2 | 0 |
| Case 26 | 12 | 133,484,722 | 133,810,935 | 1 | 0 | 1 | 0 |
| Case 26 | 13 | 19,058,717  | 115,103,529 | 1 | 1 | 2 | 0 |
| Case 26 | 14 | 19,280,733  | 19,964,076  | 1 | 1 | 2 | 0 |
| Case 26 | 14 | 20,213,937  | 20,420,338  | 5 | 0 | 5 | 1 |
| Case 26 | 14 | 20,425,051  | 22,425,847  | 1 | 1 | 2 | 0 |
| Case 26 | 14 | 22,427,444  | 22,609,387  | 2 | 1 | 3 | 0 |
| Case 26 | 14 | 22,611,467  | 22,978,516  | 2 | 2 | 4 | 0 |
| Case 26 | 14 | 22,978,577  | 58,698,338  | 1 | 1 | 2 | 0 |
| Case 26 | 14 | 58,698,844  | 58,937,374  | 1 | 0 | 1 | 0 |
| Case 26 | 14 | 58,937,391  | 61,371,810  | 1 | 1 | 2 | 0 |

|         |    |            |             |   |   |   |   |
|---------|----|------------|-------------|---|---|---|---|
| Case 26 | 14 | 61,382,747 | 62,522,935  | 1 | 0 | 1 | 0 |
| Case 26 | 14 | 62,526,170 | 77,219,538  | 1 | 1 | 2 | 0 |
| Case 26 | 14 | 77,220,685 | 77,225,591  | 5 | 0 | 5 | 1 |
| Case 26 | 14 | 77,231,722 | 107,287,663 | 1 | 1 | 2 | 0 |
| Case 26 | 15 | 20,034,919 | 30,353,491  | 1 | 1 | 2 | 0 |
| Case 26 | 15 | 30,354,303 | 31,106,826  | 0 | 0 | 0 | 0 |
| Case 26 | 15 | 31,108,789 | 32,443,813  | 1 | 1 | 2 | 0 |
| Case 26 | 15 | 32,509,892 | 32,514,341  | 5 | 0 | 5 | 1 |
| Case 26 | 15 | 32,833,659 | 102,461,162 | 1 | 1 | 2 | 0 |
| Case 26 | 16 | 88,165     | 1,143,577   | 1 | 1 | 2 | 0 |
| Case 26 | 16 | 1,143,605  | 1,187,931   | 0 | 0 | 0 | 0 |
| Case 26 | 16 | 1,192,213  | 32,137,965  | 1 | 1 | 2 | 0 |
| Case 26 | 16 | 32,257,633 | 33,460,718  | 5 | 0 | 5 | 1 |
| Case 26 | 16 | 33,557,021 | 35,285,582  | 1 | 1 | 2 | 0 |
| Case 26 | 16 | 46,450,037 | 78,149,048  | 1 | 1 | 2 | 0 |
| Case 26 | 16 | 78,151,746 | 78,413,896  | 1 | 0 | 1 | 0 |
| Case 26 | 16 | 78,417,344 | 78,420,787  | 2 | 1 | 3 | 0 |
| Case 26 | 16 | 78,420,802 | 78,682,036  | 2 | 0 | 2 | 1 |
| Case 26 | 16 | 78,684,329 | 78,760,933  | 1 | 1 | 2 | 0 |
| Case 26 | 16 | 78,761,364 | 78,955,140  | 1 | 0 | 1 | 0 |
| Case 26 | 16 | 78,960,323 | 79,056,949  | 2 | 1 | 3 | 0 |
| Case 26 | 16 | 79,057,144 | 79,199,372  | 2 | 0 | 2 | 1 |
| Case 26 | 16 | 79,199,894 | 90,274,695  | 1 | 1 | 2 | 0 |
| Case 26 | 17 | 11,885     | 22,242,355  | 1 | 1 | 2 | 0 |
| Case 26 | 17 | 25,268,142 | 81,060,040  | 1 | 1 | 2 | 0 |
| Case 26 | 18 | 87,505     | 15,375,878  | 1 | 0 | 1 | 0 |
| Case 26 | 18 | 18,520,354 | 18,539,806  | 1 | 0 | 1 | 0 |
| Case 26 | 18 | 18,546,896 | 78,015,180  | 2 | 1 | 3 | 0 |
| Case 26 | 19 | 260,912    | 9,348,586   | 1 | 1 | 2 | 0 |
| Case 26 | 19 | 9,349,367  | 9,921,575   | 1 | 0 | 1 | 0 |
| Case 26 | 19 | 9,921,593  | 11,828,410  | 1 | 1 | 2 | 0 |
| Case 26 | 19 | 11,832,283 | 12,577,302  | 1 | 0 | 1 | 0 |
| Case 26 | 19 | 12,581,063 | 19,822,049  | 1 | 1 | 2 | 0 |
| Case 26 | 19 | 19,822,451 | 19,823,734  | 0 | 0 | 0 | 0 |
| Case 26 | 19 | 19,824,850 | 20,170,214  | 1 | 1 | 2 | 0 |
| Case 26 | 19 | 20,190,141 | 21,996,666  | 1 | 0 | 1 | 0 |
| Case 26 | 19 | 22,020,770 | 23,408,129  | 1 | 1 | 2 | 0 |
| Case 26 | 19 | 23,415,601 | 24,629,285  | 1 | 0 | 1 | 0 |
| Case 26 | 19 | 27,732,159 | 28,148,773  | 1 | 0 | 1 | 0 |
| Case 26 | 19 | 28,156,666 | 37,309,964  | 1 | 1 | 2 | 0 |
| Case 26 | 19 | 37,310,116 | 38,230,720  | 1 | 0 | 1 | 0 |
| Case 26 | 19 | 38,230,743 | 40,513,191  | 1 | 1 | 2 | 0 |
| Case 26 | 19 | 40,515,744 | 40,542,386  | 0 | 0 | 0 | 0 |
| Case 26 | 19 | 40,542,426 | 44,348,824  | 1 | 1 | 2 | 0 |
| Case 26 | 19 | 44,348,919 | 44,515,137  | 1 | 0 | 1 | 0 |
| Case 26 | 19 | 44,515,352 | 52,977,019  | 1 | 1 | 2 | 0 |
| Case 26 | 19 | 52,980,756 | 53,652,020  | 1 | 0 | 1 | 0 |
| Case 26 | 19 | 53,662,306 | 59,097,160  | 1 | 1 | 2 | 0 |
| Case 26 | 20 | 63,244     | 14,055,947  | 2 | 1 | 3 | 0 |
| Case 26 | 20 | 14,066,276 | 14,431,463  | 1 | 1 | 2 | 0 |
| Case 26 | 20 | 14,434,250 | 26,293,985  | 2 | 1 | 3 | 0 |
| Case 26 | 20 | 29,425,357 | 60,891,801  | 2 | 1 | 3 | 0 |
| Case 26 | 20 | 60,892,011 | 60,920,915  | 1 | 1 | 2 | 0 |
| Case 26 | 20 | 60,920,930 | 62,155,111  | 2 | 1 | 3 | 0 |
| Case 26 | 20 | 62,157,545 | 62,421,540  | 2 | 0 | 2 | 1 |
| Case 26 | 20 | 62,421,622 | 62,678,549  | 1 | 1 | 2 | 0 |
| Case 26 | 20 | 62,681,617 | 62,948,788  | 2 | 1 | 3 | 0 |
| Case 26 | 21 | 10,827,533 | 10,971,337  | 1 | 1 | 2 | 0 |
| Case 26 | 21 | 14,368,320 | 17,767,773  | 1 | 1 | 2 | 0 |
| Case 26 | 21 | 17,768,524 | 17,775,303  | 0 | 0 | 0 | 0 |
| Case 26 | 21 | 17,777,827 | 48,100,155  | 1 | 1 | 2 | 0 |

|         |    |             |             |   |   |   |   |
|---------|----|-------------|-------------|---|---|---|---|
| Case 26 | 22 | 16,114,244  | 42,515,914  | 1 | 1 | 2 | 0 |
| Case 26 | 22 | 42,516,366  | 42,527,533  | 0 | 0 | 0 | 0 |
| Case 26 | 22 | 42,552,253  | 51,195,728  | 1 | 1 | 2 | 0 |
| Case 31 | 1  | 82,154      | 121,346,616 | 1 | 1 | 2 | 0 |
| Case 31 | 1  | 142,649,718 | 174,209,978 | 1 | 1 | 2 | 0 |
| Case 31 | 1  | 174,210,684 | 174,428,517 | 2 | 0 | 2 | 1 |
| Case 31 | 1  | 174,438,115 | 249,218,992 | 1 | 1 | 2 | 0 |
| Case 31 | 2  | 18,674      | 92,081,640  | 1 | 1 | 2 | 0 |
| Case 31 | 2  | 95,429,424  | 214,217,706 | 1 | 1 | 2 | 0 |
| Case 31 | 2  | 214,296,544 | 214,513,147 | 0 | 0 | 0 | 0 |
| Case 31 | 2  | 214,527,841 | 243,048,760 | 1 | 1 | 2 | 0 |
| Case 31 | 3  | 61,495      | 60,286,486  | 1 | 1 | 2 | 0 |
| Case 31 | 3  | 60,288,428  | 60,358,517  | 2 | 0 | 2 | 1 |
| Case 31 | 3  | 60,360,747  | 60,360,747  | 1 | 1 | 2 | 0 |
| Case 31 | 3  | 60,364,676  | 60,550,891  | 0 | 0 | 0 | 0 |
| Case 31 | 3  | 60,554,521  | 60,610,341  | 2 | 0 | 2 | 1 |
| Case 31 | 3  | 60,611,613  | 90,442,925  | 1 | 1 | 2 | 0 |
| Case 31 | 3  | 93,537,290  | 173,939,218 | 1 | 1 | 2 | 0 |
| Case 31 | 3  | 173,952,876 | 174,628,523 | 6 | 0 | 6 | 1 |
| Case 31 | 3  | 174,646,603 | 197,838,262 | 1 | 1 | 2 | 0 |
| Case 31 | 4  | 71,566      | 49,620,898  | 1 | 1 | 2 | 0 |
| Case 31 | 4  | 52,697,856  | 137,241,357 | 1 | 1 | 2 | 0 |
| Case 31 | 4  | 137,246,038 | 137,382,422 | 4 | 0 | 4 | 1 |
| Case 31 | 4  | 137,396,283 | 161,856,343 | 1 | 1 | 2 | 0 |
| Case 31 | 4  | 161,861,640 | 161,924,832 | 6 | 0 | 6 | 1 |
| Case 31 | 4  | 161,935,342 | 190,963,766 | 1 | 1 | 2 | 0 |
| Case 31 | 5  | 38,139      | 46,399,093  | 1 | 1 | 2 | 0 |
| Case 31 | 5  | 49,457,282  | 139,931,384 | 1 | 1 | 2 | 0 |
| Case 31 | 5  | 139,931,607 | 139,931,653 | 0 | 0 | 0 | 0 |
| Case 31 | 5  | 139,931,655 | 180,693,127 | 1 | 1 | 2 | 0 |
| Case 31 | 6  | 108,666     | 31,333,303  | 1 | 1 | 2 | 0 |
| Case 31 | 6  | 31,333,562  | 31,352,113  | 2 | 0 | 2 | 1 |
| Case 31 | 6  | 31,352,348  | 32,575,369  | 1 | 1 | 2 | 0 |
| Case 31 | 6  | 32,575,983  | 32,678,182  | 2 | 0 | 2 | 1 |
| Case 31 | 6  | 32,678,973  | 33,025,493  | 1 | 1 | 2 | 0 |
| Case 31 | 6  | 33,025,700  | 33,036,548  | 4 | 0 | 4 | 1 |
| Case 31 | 6  | 33,036,549  | 58,752,089  | 1 | 1 | 2 | 0 |
| Case 31 | 6  | 61,891,118  | 170,980,171 | 1 | 1 | 2 | 0 |
| Case 31 | 7  | 44,935      | 94,119      | 3 | 1 | 4 | 0 |
| Case 31 | 7  | 94,631      | 2,990,009   | 3 | 0 | 3 | 1 |
| Case 31 | 7  | 3,003,838   | 3,714,732   | 3 | 1 | 4 | 0 |
| Case 31 | 7  | 3,718,051   | 4,356,023   | 3 | 0 | 3 | 1 |
| Case 31 | 7  | 4,363,764   | 4,759,542   | 3 | 1 | 4 | 0 |
| Case 31 | 7  | 4,760,696   | 7,091,625   | 3 | 0 | 3 | 1 |
| Case 31 | 7  | 7,093,149   | 12,410,462  | 3 | 1 | 4 | 0 |
| Case 31 | 7  | 12,410,811  | 12,463,056  | 3 | 0 | 3 | 1 |
| Case 31 | 7  | 12,463,109  | 43,158,477  | 3 | 1 | 4 | 0 |
| Case 31 | 7  | 43,162,969  | 45,025,696  | 3 | 0 | 3 | 1 |
| Case 31 | 7  | 45,028,992  | 47,789,918  | 3 | 1 | 4 | 0 |
| Case 31 | 7  | 47,790,912  | 48,313,155  | 3 | 0 | 3 | 1 |
| Case 31 | 7  | 48,313,256  | 52,995,247  | 3 | 1 | 4 | 0 |
| Case 31 | 7  | 52,995,409  | 53,292,859  | 3 | 0 | 3 | 1 |
| Case 31 | 7  | 53,294,765  | 56,394,784  | 3 | 1 | 4 | 0 |
| Case 31 | 7  | 56,437,045  | 58,019,061  | 3 | 0 | 3 | 1 |
| Case 31 | 7  | 61,056,053  | 66,274,955  | 3 | 0 | 3 | 1 |
| Case 31 | 7  | 66,276,217  | 72,297,442  | 3 | 1 | 4 | 0 |
| Case 31 | 7  | 72,297,490  | 73,889,810  | 3 | 0 | 3 | 1 |
| Case 31 | 7  | 73,891,118  | 82,582,698  | 3 | 1 | 4 | 0 |
| Case 31 | 7  | 82,582,846  | 82,763,709  | 3 | 0 | 3 | 1 |
| Case 31 | 7  | 82,763,982  | 88,964,559  | 3 | 1 | 4 | 0 |
| Case 31 | 7  | 88,964,776  | 89,372,040  | 3 | 0 | 3 | 1 |

|         |    |             |             |   |   |   |   |
|---------|----|-------------|-------------|---|---|---|---|
| Case 31 | 7  | 89,373,249  | 97,478,318  | 3 | 1 | 4 | 0 |
| Case 31 | 7  | 97,480,919  | 98,225,036  | 3 | 0 | 3 | 1 |
| Case 31 | 7  | 98,226,627  | 99,022,443  | 3 | 1 | 4 | 0 |
| Case 31 | 7  | 99,022,641  | 103,202,267 | 3 | 0 | 3 | 1 |
| Case 31 | 7  | 103,202,327 | 109,168,950 | 3 | 1 | 4 | 0 |
| Case 31 | 7  | 109,170,014 | 110,047,964 | 3 | 0 | 3 | 1 |
| Case 31 | 7  | 110,052,275 | 110,559,571 | 3 | 1 | 4 | 0 |
| Case 31 | 7  | 110,561,920 | 110,840,236 | 1 | 1 | 2 | 0 |
| Case 31 | 7  | 110,843,795 | 110,924,289 | 0 | 0 | 0 | 0 |
| Case 31 | 7  | 110,931,475 | 111,379,582 | 3 | 0 | 3 | 1 |
| Case 31 | 7  | 111,382,099 | 122,763,787 | 3 | 1 | 4 | 0 |
| Case 31 | 7  | 122,766,270 | 123,467,419 | 3 | 0 | 3 | 1 |
| Case 31 | 7  | 123,475,672 | 125,224,602 | 3 | 1 | 4 | 0 |
| Case 31 | 7  | 125,231,398 | 125,508,794 | 0 | 0 | 0 | 0 |
| Case 31 | 7  | 125,515,354 | 138,692,417 | 3 | 1 | 4 | 0 |
| Case 31 | 7  | 138,693,945 | 141,088,498 | 3 | 0 | 3 | 1 |
| Case 31 | 7  | 141,091,477 | 142,498,109 | 3 | 1 | 4 | 0 |
| Case 31 | 7  | 142,500,409 | 144,216,042 | 3 | 0 | 3 | 1 |
| Case 31 | 7  | 144,216,071 | 149,514,716 | 3 | 1 | 4 | 0 |
| Case 31 | 7  | 149,514,744 | 150,327,024 | 3 | 0 | 3 | 1 |
| Case 31 | 7  | 150,327,195 | 150,681,210 | 3 | 1 | 4 | 0 |
| Case 31 | 7  | 150,683,083 | 151,070,531 | 3 | 0 | 3 | 1 |
| Case 31 | 7  | 151,071,225 | 151,684,773 | 3 | 1 | 4 | 0 |
| Case 31 | 7  | 151,693,502 | 152,262,508 | 3 | 0 | 3 | 1 |
| Case 31 | 7  | 152,269,523 | 159,119,486 | 3 | 1 | 4 | 0 |
| Case 31 | 8  | 164,984     | 43,791,691  | 1 | 1 | 2 | 0 |
| Case 31 | 8  | 46,886,735  | 146,293,414 | 1 | 1 | 2 | 0 |
| Case 31 | 9  | 46,587      | 3,303,963   | 1 | 1 | 2 | 0 |
| Case 31 | 9  | 3,306,221   | 3,594,049   | 0 | 0 | 0 | 0 |
| Case 31 | 9  | 3,595,084   | 3,827,120   | 2 | 0 | 2 | 1 |
| Case 31 | 9  | 3,827,824   | 3,898,730   | 0 | 0 | 0 | 0 |
| Case 31 | 9  | 3,898,792   | 4,555,305   | 2 | 0 | 2 | 1 |
| Case 31 | 9  | 4,555,573   | 46,944,322  | 1 | 1 | 2 | 0 |
| Case 31 | 9  | 65,629,772  | 77,247,597  | 1 | 1 | 2 | 0 |
| Case 31 | 9  | 77,254,334  | 77,312,690  | 4 | 0 | 4 | 1 |
| Case 31 | 9  | 77,313,531  | 141,066,491 | 1 | 1 | 2 | 0 |
| Case 31 | 10 | 98,087      | 39,097,912  | 1 | 1 | 2 | 0 |
| Case 31 | 10 | 42,436,301  | 135,477,883 | 1 | 1 | 2 | 0 |
| Case 31 | 11 | 193,146     | 51,591,253  | 1 | 1 | 2 | 0 |
| Case 31 | 11 | 54,794,237  | 134,934,063 | 1 | 1 | 2 | 0 |
| Case 31 | 12 | 191,619     | 34,853,011  | 1 | 1 | 2 | 0 |
| Case 31 | 12 | 37,876,400  | 133,732,604 | 1 | 1 | 2 | 0 |
| Case 31 | 12 | 133,732,685 | 133,810,935 | 0 | 0 | 0 | 0 |
| Case 31 | 13 | 19,058,717  | 95,038,990  | 1 | 1 | 2 | 0 |
| Case 31 | 13 | 95,041,111  | 95,085,417  | 6 | 0 | 6 | 1 |
| Case 31 | 13 | 95,087,393  | 115,103,529 | 1 | 1 | 2 | 0 |
| Case 31 | 14 | 19,280,733  | 20,248,611  | 1 | 1 | 2 | 0 |
| Case 31 | 14 | 20,248,671  | 20,425,051  | 4 | 0 | 4 | 1 |
| Case 31 | 14 | 20,426,742  | 107,287,663 | 1 | 1 | 2 | 0 |
| Case 31 | 15 | 20,034,919  | 102,461,162 | 1 | 1 | 2 | 0 |
| Case 31 | 16 | 88,165      | 35,285,582  | 1 | 1 | 2 | 0 |
| Case 31 | 16 | 46,450,037  | 90,274,695  | 1 | 1 | 2 | 0 |
| Case 31 | 17 | 11,885      | 22,242,355  | 1 | 1 | 2 | 0 |
| Case 31 | 17 | 25,268,142  | 81,060,040  | 1 | 1 | 2 | 0 |
| Case 31 | 18 | 87,505      | 15,375,878  | 1 | 1 | 2 | 0 |
| Case 31 | 18 | 18,520,354  | 78,015,180  | 1 | 1 | 2 | 0 |
| Case 31 | 19 | 260,912     | 24,629,285  | 1 | 1 | 2 | 0 |
| Case 31 | 19 | 27,732,159  | 27,828,664  | 1 | 1 | 2 | 0 |
| Case 31 | 19 | 27,862,694  | 34,732,571  | 5 | 0 | 5 | 1 |
| Case 31 | 19 | 34,735,393  | 34,742,705  | 1 | 1 | 2 | 0 |
| Case 31 | 19 | 34,756,853  | 59,097,160  | 4 | 0 | 4 | 1 |

|         |    |             |             |   |   |   |   |
|---------|----|-------------|-------------|---|---|---|---|
| Case 31 | 20 | 63,244      | 2,562,518   | 3 | 1 | 4 | 0 |
| Case 31 | 20 | 2,562,654   | 2,776,527   | 3 | 0 | 3 | 1 |
| Case 31 | 20 | 2,776,975   | 14,745,223  | 3 | 1 | 4 | 0 |
| Case 31 | 20 | 14,745,993  | 15,061,394  | 3 | 0 | 3 | 1 |
| Case 31 | 20 | 15,063,214  | 24,708,653  | 3 | 1 | 4 | 0 |
| Case 31 | 20 | 24,711,227  | 26,293,985  | 3 | 0 | 3 | 1 |
| Case 31 | 20 | 29,425,357  | 30,007,713  | 3 | 0 | 3 | 1 |
| Case 31 | 20 | 30,018,542  | 32,667,298  | 3 | 1 | 4 | 0 |
| Case 31 | 20 | 32,675,754  | 33,589,111  | 3 | 0 | 3 | 1 |
| Case 31 | 20 | 33,589,328  | 60,363,215  | 3 | 1 | 4 | 0 |
| Case 31 | 20 | 60,364,205  | 60,928,231  | 3 | 0 | 3 | 1 |
| Case 31 | 20 | 60,928,304  | 62,117,518  | 3 | 1 | 4 | 0 |
| Case 31 | 20 | 62,118,068  | 62,948,788  | 3 | 0 | 3 | 1 |
| Case 31 | 21 | 10,827,533  | 10,971,337  | 1 | 1 | 2 | 0 |
| Case 31 | 21 | 14,368,320  | 48,100,155  | 1 | 1 | 2 | 0 |
| Case 31 | 22 | 16,114,244  | 25,124,711  | 1 | 1 | 2 | 0 |
| Case 31 | 22 | 25,127,810  | 25,135,682  | 6 | 0 | 6 | 1 |
| Case 31 | 22 | 25,144,894  | 51,195,728  | 1 | 1 | 2 | 0 |
| Case 34 | 1  | 82,154      | 121,346,616 | 1 | 1 | 2 | 0 |
| Case 34 | 1  | 142,649,718 | 249,218,992 | 1 | 1 | 2 | 0 |
| Case 34 | 2  | 18,674      | 87,095,286  | 1 | 1 | 2 | 0 |
| Case 34 | 2  | 87,108,211  | 87,322,042  | 1 | 0 | 1 | 0 |
| Case 34 | 2  | 87,405,001  | 88,000,554  | 7 | 0 | 7 | 1 |
| Case 34 | 2  | 88,286,668  | 92,081,640  | 1 | 1 | 2 | 0 |
| Case 34 | 2  | 95,429,424  | 202,922,665 | 1 | 1 | 2 | 0 |
| Case 34 | 2  | 202,925,675 | 204,354,309 | 1 | 0 | 1 | 0 |
| Case 34 | 2  | 204,354,476 | 241,826,558 | 1 | 1 | 2 | 0 |
| Case 34 | 2  | 241,827,779 | 243,048,760 | 1 | 0 | 1 | 0 |
| Case 34 | 3  | 61,495      | 57,143,567  | 1 | 1 | 2 | 0 |
| Case 34 | 3  | 57,143,645  | 57,978,283  | 1 | 0 | 1 | 0 |
| Case 34 | 3  | 57,978,556  | 65,180,001  | 1 | 1 | 2 | 0 |
| Case 34 | 3  | 65,184,899  | 65,214,533  | 0 | 0 | 0 | 0 |
| Case 34 | 3  | 65,215,804  | 87,417,191  | 1 | 1 | 2 | 0 |
| Case 34 | 3  | 87,426,052  | 88,205,454  | 1 | 0 | 1 | 0 |
| Case 34 | 3  | 88,205,579  | 90,442,925  | 1 | 1 | 2 | 0 |
| Case 34 | 3  | 93,537,290  | 197,838,262 | 1 | 1 | 2 | 0 |
| Case 34 | 4  | 71,566      | 367,142     | 1 | 1 | 2 | 0 |
| Case 34 | 4  | 367,927     | 437,166     | 0 | 0 | 0 | 0 |
| Case 34 | 4  | 437,720     | 49,620,898  | 1 | 1 | 2 | 0 |
| Case 34 | 4  | 52,697,856  | 83,758,827  | 1 | 1 | 2 | 0 |
| Case 34 | 4  | 83,763,292  | 84,519,076  | 1 | 0 | 1 | 0 |
| Case 34 | 4  | 84,519,270  | 113,350,387 | 1 | 1 | 2 | 0 |
| Case 34 | 4  | 113,350,665 | 113,915,647 | 1 | 0 | 1 | 0 |
| Case 34 | 4  | 113,916,575 | 165,644,827 | 1 | 1 | 2 | 0 |
| Case 34 | 4  | 165,646,228 | 166,021,848 | 1 | 0 | 1 | 0 |
| Case 34 | 4  | 166,023,258 | 188,690,307 | 1 | 1 | 2 | 0 |
| Case 34 | 4  | 188,698,095 | 190,963,766 | 1 | 0 | 1 | 0 |
| Case 34 | 5  | 38,139      | 46,399,093  | 1 | 1 | 2 | 0 |
| Case 34 | 5  | 49,457,282  | 179,681,514 | 1 | 1 | 2 | 0 |
| Case 34 | 5  | 179,682,832 | 180,065,455 | 1 | 0 | 1 | 0 |
| Case 34 | 5  | 180,067,675 | 180,693,127 | 1 | 1 | 2 | 0 |
| Case 34 | 6  | 108,666     | 30,755,893  | 1 | 1 | 2 | 0 |
| Case 34 | 6  | 30,756,066  | 31,482,203  | 2 | 0 | 2 | 1 |
| Case 34 | 6  | 31,483,415  | 32,365,580  | 1 | 1 | 2 | 0 |
| Case 34 | 6  | 32,365,840  | 32,706,398  | 2 | 0 | 2 | 1 |
| Case 34 | 6  | 32,706,416  | 42,712,809  | 1 | 1 | 2 | 0 |
| Case 34 | 6  | 42,712,977  | 42,935,233  | 1 | 0 | 1 | 0 |
| Case 34 | 6  | 42,935,272  | 58,752,089  | 1 | 1 | 2 | 0 |
| Case 34 | 6  | 61,891,118  | 170,980,171 | 1 | 1 | 2 | 0 |
| Case 34 | 7  | 44,935      | 57,528,311  | 1 | 1 | 2 | 0 |
| Case 34 | 7  | 57,529,604  | 58,019,061  | 0 | 0 | 0 | 0 |



|         |    |             |             |   |   |   |   |
|---------|----|-------------|-------------|---|---|---|---|
| Case 34 | 7  | 61,056,053  | 62,677,044  | 0 | 0 | 0 | 0 |
| Case 34 | 7  | 62,689,447  | 159,119,486 | 1 | 1 | 2 | 0 |
| Case 34 | 8  | 164,984     | 27,622,762  | 1 | 1 | 2 | 0 |
| Case 34 | 8  | 27,623,209  | 27,658,491  | 0 | 0 | 0 | 0 |
| Case 34 | 8  | 27,664,686  | 29,927,358  | 1 | 1 | 2 | 0 |
| Case 34 | 8  | 29,927,462  | 30,700,386  | 1 | 0 | 1 | 0 |
| Case 34 | 8  | 30,700,439  | 43,791,691  | 1 | 1 | 2 | 0 |
| Case 34 | 8  | 46,886,735  | 142,488,994 | 1 | 1 | 2 | 0 |
| Case 34 | 8  | 142,489,329 | 142,489,370 | 0 | 0 | 0 | 0 |
| Case 34 | 8  | 142,489,392 | 143,394,496 | 2 | 2 | 4 | 0 |
| Case 34 | 8  | 143,395,768 | 146,293,414 | 1 | 1 | 2 | 0 |
| Case 34 | 9  | 46,587      | 1,050,981   | 1 | 0 | 1 | 0 |
| Case 34 | 9  | 1,051,758   | 9,389,992   | 1 | 1 | 2 | 0 |
| Case 34 | 9  | 9,392,168   | 9,817,393   | 1 | 0 | 1 | 0 |
| Case 34 | 9  | 9,818,094   | 46,944,322  | 1 | 1 | 2 | 0 |
| Case 34 | 9  | 65,629,772  | 79,714,137  | 1 | 1 | 2 | 0 |
| Case 34 | 9  | 79,724,774  | 80,071,833  | 1 | 0 | 1 | 0 |
| Case 34 | 9  | 80,075,134  | 99,521,123  | 1 | 1 | 2 | 0 |
| Case 34 | 9  | 99,521,136  | 99,538,169  | 0 | 0 | 0 | 0 |
| Case 34 | 9  | 99,538,347  | 130,493,309 | 1 | 1 | 2 | 0 |
| Case 34 | 9  | 130,493,488 | 131,038,966 | 1 | 0 | 1 | 0 |
| Case 34 | 9  | 131,039,250 | 140,001,771 | 1 | 1 | 2 | 0 |
| Case 34 | 9  | 140,001,888 | 140,661,826 | 1 | 0 | 1 | 0 |
| Case 34 | 9  | 140,663,554 | 141,066,491 | 1 | 1 | 2 | 0 |
| Case 34 | 10 | 98,087      | 7,605,243   | 1 | 1 | 2 | 0 |
| Case 34 | 10 | 7,605,263   | 7,786,234   | 1 | 0 | 1 | 0 |
| Case 34 | 10 | 7,786,236   | 18,762,948  | 1 | 1 | 2 | 0 |
| Case 34 | 10 | 18,763,854  | 19,536,557  | 1 | 0 | 1 | 0 |
| Case 34 | 10 | 19,540,391  | 26,197,516  | 1 | 1 | 2 | 0 |
| Case 34 | 10 | 26,201,259  | 27,776,411  | 1 | 0 | 1 | 0 |
| Case 34 | 10 | 27,783,076  | 39,097,912  | 1 | 1 | 2 | 0 |
| Case 34 | 10 | 42,436,301  | 69,676,297  | 1 | 1 | 2 | 0 |
| Case 34 | 10 | 69,676,830  | 70,645,107  | 1 | 0 | 1 | 0 |
| Case 34 | 10 | 70,645,258  | 135,477,883 | 1 | 1 | 2 | 0 |
| Case 34 | 11 | 193,146     | 24,132,249  | 1 | 1 | 2 | 0 |
| Case 34 | 11 | 24,132,555  | 24,483,140  | 0 | 0 | 0 | 0 |
| Case 34 | 11 | 24,488,141  | 50,467,961  | 1 | 1 | 2 | 0 |
| Case 34 | 11 | 50,468,978  | 51,591,253  | 1 | 0 | 1 | 0 |
| Case 34 | 11 | 54,794,237  | 55,110,806  | 1 | 0 | 1 | 0 |
| Case 34 | 11 | 55,110,807  | 55,362,955  | 1 | 1 | 2 | 0 |
| Case 34 | 11 | 55,370,325  | 55,427,700  | 0 | 0 | 0 | 0 |
| Case 34 | 11 | 55,431,897  | 134,934,063 | 1 | 1 | 2 | 0 |
| Case 34 | 12 | 191,619     | 724,279     | 1 | 1 | 2 | 0 |
| Case 34 | 12 | 736,714     | 1,674,239   | 1 | 0 | 1 | 0 |
| Case 34 | 12 | 1,674,288   | 34,294,699  | 1 | 1 | 2 | 0 |
| Case 34 | 12 | 34,306,859  | 34,853,011  | 0 | 0 | 0 | 0 |
| Case 34 | 12 | 37,876,400  | 38,514,872  | 0 | 0 | 0 | 0 |
| Case 34 | 12 | 38,528,487  | 133,810,935 | 1 | 1 | 2 | 0 |
| Case 34 | 13 | 19,058,717  | 96,004,493  | 1 | 1 | 2 | 0 |
| Case 34 | 13 | 96,010,800  | 97,049,100  | 1 | 0 | 1 | 0 |
| Case 34 | 13 | 97,052,022  | 115,103,529 | 1 | 1 | 2 | 0 |
| Case 34 | 14 | 19,280,733  | 20,249,286  | 1 | 1 | 2 | 0 |
| Case 34 | 14 | 20,249,316  | 20,420,338  | 4 | 0 | 4 | 1 |
| Case 34 | 14 | 20,425,051  | 22,590,877  | 1 | 1 | 2 | 0 |
| Case 34 | 14 | 22,590,996  | 22,970,327  | 2 | 2 | 4 | 0 |
| Case 34 | 14 | 22,972,815  | 31,357,217  | 1 | 1 | 2 | 0 |
| Case 34 | 14 | 31,358,377  | 32,311,115  | 1 | 0 | 1 | 0 |
| Case 34 | 14 | 32,312,807  | 35,231,108  | 1 | 1 | 2 | 0 |
| Case 34 | 14 | 35,231,242  | 36,437,818  | 1 | 0 | 1 | 0 |
| Case 34 | 14 | 36,444,307  | 39,500,519  | 1 | 1 | 2 | 0 |
| Case 34 | 14 | 39,506,601  | 39,998,458  | 1 | 0 | 1 | 0 |

|         |    |             |             |   |   |   |   |
|---------|----|-------------|-------------|---|---|---|---|
| Case 34 | 14 | 40,004,891  | 50,069,088  | 1 | 1 | 2 | 0 |
| Case 34 | 14 | 50,069,160  | 50,806,101  | 1 | 0 | 1 | 0 |
| Case 34 | 14 | 50,806,676  | 55,292,269  | 1 | 1 | 2 | 0 |
| Case 34 | 14 | 55,294,104  | 56,173,687  | 1 | 0 | 1 | 0 |
| Case 34 | 14 | 56,177,363  | 57,920,445  | 1 | 1 | 2 | 0 |
| Case 34 | 14 | 57,931,444  | 59,131,632  | 1 | 0 | 1 | 0 |
| Case 34 | 14 | 59,134,382  | 63,857,808  | 1 | 1 | 2 | 0 |
| Case 34 | 14 | 63,867,140  | 64,658,226  | 1 | 0 | 1 | 0 |
| Case 34 | 14 | 64,665,060  | 73,521,060  | 1 | 1 | 2 | 0 |
| Case 34 | 14 | 73,524,541  | 74,665,673  | 1 | 0 | 1 | 0 |
| Case 34 | 14 | 74,666,824  | 105,673,692 | 1 | 1 | 2 | 0 |
| Case 34 | 14 | 105,674,225 | 107,287,663 | 1 | 0 | 1 | 0 |
| Case 34 | 15 | 20,034,919  | 102,461,162 | 1 | 1 | 2 | 0 |
| Case 34 | 16 | 88,165      | 35,285,582  | 1 | 1 | 2 | 0 |
| Case 34 | 16 | 46,450,037  | 68,719,251  | 1 | 1 | 2 | 0 |
| Case 34 | 16 | 68,721,470  | 69,970,529  | 1 | 0 | 1 | 0 |
| Case 34 | 16 | 69,971,543  | 73,976,130  | 1 | 1 | 2 | 0 |
| Case 34 | 16 | 73,986,771  | 75,904,514  | 1 | 0 | 1 | 0 |
| Case 34 | 16 | 75,922,170  | 81,173,461  | 1 | 1 | 2 | 0 |
| Case 34 | 16 | 81,174,958  | 81,187,021  | 0 | 0 | 0 | 0 |
| Case 34 | 16 | 81,187,635  | 89,696,828  | 1 | 1 | 2 | 0 |
| Case 34 | 16 | 89,702,317  | 89,845,194  | 1 | 0 | 1 | 0 |
| Case 34 | 16 | 89,845,371  | 90,274,695  | 1 | 1 | 2 | 0 |
| Case 34 | 17 | 11,885      | 1,002,010   | 1 | 1 | 2 | 0 |
| Case 34 | 17 | 1,002,846   | 1,657,073   | 1 | 0 | 1 | 0 |
| Case 34 | 17 | 1,657,653   | 9,602,122   | 1 | 1 | 2 | 0 |
| Case 34 | 17 | 9,604,888   | 10,055,514  | 2 | 0 | 2 | 1 |
| Case 34 | 17 | 10,055,680  | 22,242,355  | 1 | 1 | 2 | 0 |
| Case 34 | 17 | 25,268,142  | 58,613,330  | 1 | 1 | 2 | 0 |
| Case 34 | 17 | 58,638,515  | 58,898,088  | 0 | 0 | 0 | 0 |
| Case 34 | 17 | 58,901,716  | 81,060,040  | 1 | 1 | 2 | 0 |
| Case 34 | 18 | 87,505      | 15,375,878  | 1 | 1 | 2 | 0 |
| Case 34 | 18 | 18,520,354  | 78,015,180  | 1 | 1 | 2 | 0 |
| Case 34 | 19 | 260,912     | 4,511,612   | 1 | 1 | 2 | 0 |
| Case 34 | 19 | 4,511,913   | 4,523,593   | 0 | 0 | 0 | 0 |
| Case 34 | 19 | 4,523,694   | 8,130,867   | 1 | 1 | 2 | 0 |
| Case 34 | 19 | 8,130,933   | 8,155,130   | 0 | 0 | 0 | 0 |
| Case 34 | 19 | 8,156,221   | 11,832,649  | 1 | 1 | 2 | 0 |
| Case 34 | 19 | 11,832,835  | 12,774,561  | 1 | 0 | 1 | 0 |
| Case 34 | 19 | 12,774,562  | 20,329,637  | 1 | 1 | 2 | 0 |
| Case 34 | 19 | 20,397,555  | 22,089,322  | 1 | 0 | 1 | 0 |
| Case 34 | 19 | 22,092,288  | 23,373,200  | 1 | 1 | 2 | 0 |
| Case 34 | 19 | 23,382,990  | 24,629,285  | 1 | 0 | 1 | 0 |
| Case 34 | 19 | 27,732,159  | 28,156,666  | 1 | 0 | 1 | 0 |
| Case 34 | 19 | 28,178,423  | 36,813,497  | 1 | 1 | 2 | 0 |
| Case 34 | 19 | 36,814,379  | 38,378,669  | 1 | 0 | 1 | 0 |
| Case 34 | 19 | 38,379,446  | 52,520,568  | 1 | 1 | 2 | 0 |
| Case 34 | 19 | 52,520,595  | 53,311,563  | 1 | 0 | 1 | 0 |
| Case 34 | 19 | 53,332,039  | 53,358,889  | 7 | 0 | 7 | 1 |
| Case 34 | 19 | 53,363,030  | 57,585,986  | 1 | 1 | 2 | 0 |
| Case 34 | 19 | 57,588,298  | 58,490,769  | 1 | 0 | 1 | 0 |
| Case 34 | 19 | 58,490,898  | 59,097,160  | 1 | 1 | 2 | 0 |
| Case 34 | 20 | 63,244      | 26,293,985  | 1 | 1 | 2 | 0 |
| Case 34 | 20 | 29,425,357  | 62,066,793  | 1 | 1 | 2 | 0 |
| Case 34 | 20 | 62,070,966  | 62,219,740  | 1 | 0 | 1 | 0 |
| Case 34 | 20 | 62,219,837  | 62,948,788  | 1 | 1 | 2 | 0 |
| Case 34 | 21 | 10,827,533  | 10,971,337  | 1 | 1 | 2 | 0 |
| Case 34 | 21 | 14,368,320  | 48,100,155  | 1 | 1 | 2 | 0 |
| Case 34 | 22 | 16,114,244  | 51,195,728  | 1 | 1 | 2 | 0 |
| Case 35 | 1  | 82,154      | 1,222,528   | 1 | 1 | 2 | 0 |
| Case 35 | 1  | 1,222,529   | 1,247,736   | 1 | 0 | 1 | 0 |

|         |   |             |             |   |   |   |   |
|---------|---|-------------|-------------|---|---|---|---|
| Case 35 | 1 | 1,247,820   | 12,852,872  | 1 | 1 | 2 | 0 |
| Case 35 | 1 | 12,854,507  | 12,920,053  | 2 | 1 | 3 | 0 |
| Case 35 | 1 | 12,921,252  | 26,721,287  | 1 | 1 | 2 | 0 |
| Case 35 | 1 | 26,722,384  | 27,933,024  | 1 | 0 | 1 | 0 |
| Case 35 | 1 | 27,937,456  | 121,346,616 | 1 | 1 | 2 | 0 |
| Case 35 | 1 | 142,649,718 | 180,221,084 | 1 | 1 | 2 | 0 |
| Case 35 | 1 | 180,225,223 | 180,232,398 | 0 | 0 | 0 | 0 |
| Case 35 | 1 | 180,232,750 | 249,218,992 | 1 | 1 | 2 | 0 |
| Case 35 | 2 | 18,674      | 92,081,640  | 1 | 1 | 2 | 0 |
| Case 35 | 2 | 95,429,424  | 212,367,912 | 1 | 1 | 2 | 0 |
| Case 35 | 2 | 212,375,386 | 212,526,025 | 1 | 0 | 1 | 0 |
| Case 35 | 2 | 212,527,729 | 243,048,760 | 1 | 1 | 2 | 0 |
| Case 35 | 3 | 61,495      | 59,828,477  | 1 | 1 | 2 | 0 |
| Case 35 | 3 | 59,839,995  | 59,904,811  | 1 | 0 | 1 | 0 |
| Case 35 | 3 | 59,905,777  | 59,905,777  | 1 | 1 | 2 | 0 |
| Case 35 | 3 | 59,905,961  | 60,167,219  | 2 | 0 | 2 | 1 |
| Case 35 | 3 | 60,170,083  | 60,295,081  | 2 | 1 | 3 | 0 |
| Case 35 | 3 | 60,298,229  | 60,388,743  | 1 | 1 | 2 | 0 |
| Case 35 | 3 | 60,390,846  | 60,461,416  | 0 | 0 | 0 | 0 |
| Case 35 | 3 | 60,461,994  | 60,461,994  | 1 | 1 | 2 | 0 |
| Case 35 | 3 | 60,464,275  | 60,574,546  | 1 | 0 | 1 | 0 |
| Case 35 | 3 | 60,576,324  | 60,576,769  | 1 | 1 | 2 | 0 |
| Case 35 | 3 | 60,581,806  | 82,145,477  | 2 | 1 | 3 | 0 |
| Case 35 | 3 | 82,148,325  | 82,678,168  | 1 | 1 | 2 | 0 |
| Case 35 | 3 | 82,687,133  | 85,407,057  | 2 | 1 | 3 | 0 |
| Case 35 | 3 | 85,414,291  | 85,710,336  | 1 | 1 | 2 | 0 |
| Case 35 | 3 | 85,712,974  | 87,433,003  | 2 | 1 | 3 | 0 |
| Case 35 | 3 | 87,438,524  | 88,037,200  | 1 | 1 | 2 | 0 |
| Case 35 | 3 | 88,039,942  | 90,442,925  | 2 | 1 | 3 | 0 |
| Case 35 | 3 | 93,537,290  | 97,879,569  | 2 | 1 | 3 | 0 |
| Case 35 | 3 | 97,883,653  | 98,141,086  | 1 | 1 | 2 | 0 |
| Case 35 | 3 | 98,147,260  | 121,415,795 | 2 | 1 | 3 | 0 |
| Case 35 | 3 | 121,415,988 | 121,615,366 | 1 | 1 | 2 | 0 |
| Case 35 | 3 | 121,615,515 | 126,113,127 | 2 | 1 | 3 | 0 |
| Case 35 | 3 | 126,116,410 | 126,180,826 | 1 | 1 | 2 | 0 |
| Case 35 | 3 | 126,180,849 | 179,733,753 | 2 | 1 | 3 | 0 |
| Case 35 | 3 | 179,738,924 | 180,342,293 | 1 | 1 | 2 | 0 |
| Case 35 | 3 | 180,347,917 | 197,838,262 | 2 | 1 | 3 | 0 |
| Case 35 | 4 | 71,566      | 49,620,898  | 1 | 1 | 2 | 0 |
| Case 35 | 4 | 52,697,856  | 190,963,766 | 1 | 1 | 2 | 0 |
| Case 35 | 5 | 38,139      | 46,399,093  | 1 | 1 | 2 | 0 |
| Case 35 | 5 | 49,457,282  | 68,920,307  | 1 | 1 | 2 | 0 |
| Case 35 | 5 | 70,305,696  | 70,308,271  | 0 | 0 | 0 | 0 |
| Case 35 | 5 | 70,308,421  | 139,931,384 | 1 | 1 | 2 | 0 |
| Case 35 | 5 | 139,931,607 | 139,936,823 | 0 | 0 | 0 | 0 |
| Case 35 | 5 | 139,936,825 | 140,765,000 | 1 | 1 | 2 | 0 |
| Case 35 | 5 | 140,768,132 | 140,777,577 | 0 | 0 | 0 | 0 |
| Case 35 | 5 | 140,778,151 | 166,823,660 | 1 | 1 | 2 | 0 |
| Case 35 | 5 | 166,824,102 | 180,693,127 | 2 | 1 | 3 | 0 |
| Case 35 | 6 | 108,666     | 1,035,010   | 2 | 0 | 2 | 1 |
| Case 35 | 6 | 1,035,675   | 1,261,007   | 3 | 0 | 3 | 1 |
| Case 35 | 6 | 1,261,609   | 2,772,244   | 2 | 0 | 2 | 1 |
| Case 35 | 6 | 2,774,052   | 3,740,307   | 3 | 0 | 3 | 1 |
| Case 35 | 6 | 3,742,857   | 17,834,942  | 2 | 0 | 2 | 1 |
| Case 35 | 6 | 17,837,268  | 18,387,265  | 3 | 0 | 3 | 1 |
| Case 35 | 6 | 18,387,692  | 20,057,330  | 2 | 0 | 2 | 1 |
| Case 35 | 6 | 20,057,889  | 27,329,788  | 3 | 0 | 3 | 1 |
| Case 35 | 6 | 27,332,298  | 27,706,180  | 4 | 0 | 4 | 1 |
| Case 35 | 6 | 27,707,046  | 28,967,767  | 3 | 0 | 3 | 1 |
| Case 35 | 6 | 28,968,146  | 29,183,346  | 4 | 0 | 4 | 1 |
| Case 35 | 6 | 29,184,660  | 29,473,501  | 3 | 0 | 3 | 1 |

|         |    |             |             |   |   |   |   |
|---------|----|-------------|-------------|---|---|---|---|
| Case 35 | 6  | 29,474,385  | 29,518,472  | 4 | 0 | 4 | 1 |
| Case 35 | 6  | 29,518,934  | 31,133,943  | 3 | 0 | 3 | 1 |
| Case 35 | 6  | 31,134,532  | 31,255,007  | 4 | 0 | 4 | 1 |
| Case 35 | 6  | 31,255,424  | 32,285,596  | 3 | 0 | 3 | 1 |
| Case 35 | 6  | 32,286,102  | 32,334,754  | 4 | 0 | 4 | 1 |
| Case 35 | 6  | 32,335,204  | 32,657,578  | 3 | 0 | 3 | 1 |
| Case 35 | 6  | 32,658,079  | 32,682,664  | 4 | 0 | 4 | 1 |
| Case 35 | 6  | 32,682,724  | 47,253,884  | 3 | 0 | 3 | 1 |
| Case 35 | 6  | 47,253,985  | 58,752,089  | 2 | 1 | 3 | 0 |
| Case 35 | 6  | 61,891,118  | 120,978,943 | 2 | 1 | 3 | 0 |
| Case 35 | 6  | 120,983,610 | 170,980,171 | 1 | 1 | 2 | 0 |
| Case 35 | 7  | 44,935      | 4,830,379   | 1 | 1 | 2 | 0 |
| Case 35 | 7  | 4,830,425   | 4,843,335   | 1 | 0 | 1 | 0 |
| Case 35 | 7  | 4,845,701   | 11,306,897  | 1 | 1 | 2 | 0 |
| Case 35 | 7  | 11,313,841  | 11,349,438  | 0 | 0 | 0 | 0 |
| Case 35 | 7  | 11,351,104  | 58,019,061  | 1 | 1 | 2 | 0 |
| Case 35 | 7  | 61,056,053  | 149,486,404 | 1 | 1 | 2 | 0 |
| Case 35 | 7  | 149,486,420 | 149,489,473 | 0 | 0 | 0 | 0 |
| Case 35 | 7  | 149,489,491 | 159,119,486 | 1 | 1 | 2 | 0 |
| Case 35 | 8  | 164,984     | 10,465,490  | 2 | 1 | 3 | 0 |
| Case 35 | 8  | 10,465,636  | 10,467,673  | 1 | 1 | 2 | 0 |
| Case 35 | 8  | 10,467,754  | 43,791,691  | 2 | 1 | 3 | 0 |
| Case 35 | 8  | 46,886,735  | 144,398,191 | 2 | 1 | 3 | 0 |
| Case 35 | 8  | 144,398,198 | 144,522,498 | 1 | 1 | 2 | 0 |
| Case 35 | 8  | 144,526,905 | 144,669,392 | 2 | 0 | 2 | 1 |
| Case 35 | 8  | 144,670,950 | 144,992,347 | 1 | 1 | 2 | 0 |
| Case 35 | 8  | 144,992,368 | 145,154,910 | 2 | 0 | 2 | 1 |
| Case 35 | 8  | 145,155,408 | 145,689,250 | 2 | 1 | 3 | 0 |
| Case 35 | 8  | 145,689,685 | 145,907,087 | 1 | 1 | 2 | 0 |
| Case 35 | 8  | 145,919,126 | 146,293,414 | 2 | 1 | 3 | 0 |
| Case 35 | 9  | 46,587      | 46,944,322  | 1 | 1 | 2 | 0 |
| Case 35 | 9  | 65,629,772  | 96,271,752  | 1 | 1 | 2 | 0 |
| Case 35 | 9  | 96,291,224  | 96,407,983  | 1 | 0 | 1 | 0 |
| Case 35 | 9  | 96,411,956  | 97,221,434  | 1 | 1 | 2 | 0 |
| Case 35 | 9  | 97,221,450  | 97,367,819  | 2 | 1 | 3 | 0 |
| Case 35 | 9  | 97,367,834  | 140,242,525 | 1 | 1 | 2 | 0 |
| Case 35 | 9  | 140,242,536 | 140,250,738 | 1 | 0 | 1 | 0 |
| Case 35 | 9  | 140,250,749 | 141,066,491 | 1 | 1 | 2 | 0 |
| Case 35 | 10 | 98,087      | 7,617,810   | 1 | 1 | 2 | 0 |
| Case 35 | 10 | 7,618,440   | 7,618,686   | 0 | 0 | 0 | 0 |
| Case 35 | 10 | 7,618,739   | 39,097,912  | 1 | 1 | 2 | 0 |
| Case 35 | 10 | 42,436,301  | 135,477,883 | 1 | 1 | 2 | 0 |
| Case 35 | 11 | 193,146     | 7,801,926   | 1 | 1 | 2 | 0 |
| Case 35 | 11 | 7,817,512   | 7,838,441   | 0 | 0 | 0 | 0 |
| Case 35 | 11 | 7,843,317   | 50,008,258  | 1 | 1 | 2 | 0 |
| Case 35 | 11 | 50,057,854  | 50,349,310  | 0 | 0 | 0 | 0 |
| Case 35 | 11 | 50,367,359  | 51,591,253  | 1 | 1 | 2 | 0 |
| Case 35 | 11 | 54,794,237  | 97,612,364  | 1 | 1 | 2 | 0 |
| Case 35 | 11 | 97,614,840  | 97,709,396  | 0 | 0 | 0 | 0 |
| Case 35 | 11 | 97,722,738  | 120,323,214 | 1 | 1 | 2 | 0 |
| Case 35 | 11 | 120,328,462 | 120,624,486 | 1 | 0 | 1 | 0 |
| Case 35 | 11 | 120,624,525 | 134,934,063 | 1 | 1 | 2 | 0 |
| Case 35 | 12 | 191,619     | 34,853,011  | 1 | 1 | 2 | 0 |
| Case 35 | 12 | 37,876,400  | 131,797,608 | 1 | 1 | 2 | 0 |
| Case 35 | 12 | 131,800,059 | 131,825,125 | 0 | 0 | 0 | 0 |
| Case 35 | 12 | 131,830,332 | 133,810,935 | 1 | 1 | 2 | 0 |
| Case 35 | 13 | 19,058,717  | 115,103,529 | 2 | 1 | 3 | 0 |
| Case 35 | 14 | 19,280,733  | 19,700,048  | 2 | 0 | 2 | 1 |
| Case 35 | 14 | 19,847,604  | 19,964,076  | 3 | 0 | 3 | 1 |
| Case 35 | 14 | 20,213,937  | 20,420,338  | 4 | 0 | 4 | 1 |
| Case 35 | 14 | 20,425,051  | 20,425,051  | 2 | 1 | 3 | 0 |

|         |    |            |             |   |   |   |   |
|---------|----|------------|-------------|---|---|---|---|
| Case 35 | 14 | 20,426,742 | 107,287,663 | 1 | 1 | 2 | 0 |
| Case 35 | 15 | 20,034,919 | 42,144,480  | 1 | 1 | 2 | 0 |
| Case 35 | 15 | 42,145,167 | 42,155,032  | 1 | 0 | 1 | 0 |
| Case 35 | 15 | 42,155,925 | 43,890,409  | 1 | 1 | 2 | 0 |
| Case 35 | 15 | 43,891,364 | 43,939,659  | 2 | 1 | 3 | 0 |
| Case 35 | 15 | 43,990,211 | 63,200,722  | 1 | 1 | 2 | 0 |
| Case 35 | 15 | 63,201,335 | 63,207,340  | 0 | 0 | 0 | 0 |
| Case 35 | 15 | 63,210,397 | 102,461,162 | 1 | 1 | 2 | 0 |
| Case 35 | 16 | 88,165     | 818,689     | 1 | 1 | 2 | 0 |
| Case 35 | 16 | 818,698    | 843,247     | 1 | 0 | 1 | 0 |
| Case 35 | 16 | 844,059    | 1,155,025   | 1 | 1 | 2 | 0 |
| Case 35 | 16 | 1,159,731  | 1,194,437   | 0 | 0 | 0 | 0 |
| Case 35 | 16 | 1,196,760  | 1,536,938   | 1 | 1 | 2 | 0 |
| Case 35 | 16 | 1,537,391  | 1,550,623   | 1 | 0 | 1 | 0 |
| Case 35 | 16 | 1,551,082  | 7,055,828   | 1 | 1 | 2 | 0 |
| Case 35 | 16 | 7,062,553  | 7,078,229   | 0 | 0 | 0 | 0 |
| Case 35 | 16 | 7,091,954  | 35,285,582  | 1 | 1 | 2 | 0 |
| Case 35 | 16 | 46,450,037 | 78,921,105  | 1 | 1 | 2 | 0 |
| Case 35 | 16 | 78,923,668 | 79,054,020  | 2 | 0 | 2 | 1 |
| Case 35 | 16 | 79,055,748 | 90,274,695  | 1 | 1 | 2 | 0 |
| Case 35 | 17 | 11,885     | 22,242,355  | 1 | 1 | 2 | 0 |
| Case 35 | 17 | 25,268,142 | 34,436,708  | 1 | 1 | 2 | 0 |
| Case 35 | 17 | 34,443,811 | 34,815,551  | 2 | 1 | 3 | 0 |
| Case 35 | 17 | 34,819,191 | 46,839,566  | 1 | 1 | 2 | 0 |
| Case 35 | 17 | 46,840,178 | 46,848,470  | 1 | 0 | 1 | 0 |
| Case 35 | 17 | 46,862,392 | 56,421,270  | 1 | 1 | 2 | 0 |
| Case 35 | 17 | 56,421,706 | 79,171,929  | 2 | 1 | 3 | 0 |
| Case 35 | 17 | 79,171,959 | 79,180,632  | 1 | 1 | 2 | 0 |
| Case 35 | 17 | 79,180,659 | 79,540,449  | 2 | 0 | 2 | 1 |
| Case 35 | 17 | 79,541,116 | 81,060,040  | 2 | 1 | 3 | 0 |
| Case 35 | 18 | 87,505     | 15,375,878  | 1 | 1 | 2 | 0 |
| Case 35 | 18 | 18,520,354 | 78,015,180  | 1 | 1 | 2 | 0 |
| Case 35 | 19 | 260,912    | 24,629,285  | 1 | 1 | 2 | 0 |
| Case 35 | 19 | 27,732,159 | 49,116,307  | 1 | 1 | 2 | 0 |
| Case 35 | 19 | 49,116,346 | 49,118,371  | 0 | 0 | 0 | 0 |
| Case 35 | 19 | 49,120,041 | 49,431,839  | 1 | 1 | 2 | 0 |
| Case 35 | 19 | 49,436,980 | 49,472,745  | 1 | 0 | 1 | 0 |
| Case 35 | 19 | 49,472,837 | 59,097,160  | 1 | 1 | 2 | 0 |
| Case 35 | 20 | 63,244     | 26,293,985  | 1 | 1 | 2 | 0 |
| Case 35 | 20 | 29,425,357 | 62,948,788  | 1 | 1 | 2 | 0 |
| Case 35 | 21 | 10,827,533 | 10,971,337  | 1 | 1 | 2 | 0 |
| Case 35 | 21 | 14,368,320 | 47,805,891  | 1 | 1 | 2 | 0 |
| Case 35 | 21 | 47,808,673 | 47,836,653  | 1 | 0 | 1 | 0 |
| Case 35 | 21 | 47,838,123 | 48,100,155  | 1 | 1 | 2 | 0 |
| Case 35 | 22 | 16,114,244 | 22,319,731  | 1 | 1 | 2 | 0 |
| Case 35 | 22 | 22,322,028 | 22,400,423  | 2 | 1 | 3 | 0 |
| Case 35 | 22 | 22,401,006 | 51,195,728  | 1 | 1 | 2 | 0 |
| Case 36 | 1  | 82,154     | 14,776,392  | 2 | 2 | 4 | 0 |
| Case 36 | 1  | 14,777,904 | 17,249,173  | 3 | 0 | 3 | 1 |
| Case 36 | 1  | 17,249,200 | 17,296,818  | 2 | 0 | 2 | 1 |
| Case 36 | 1  | 17,296,833 | 21,011,510  | 3 | 0 | 3 | 1 |
| Case 36 | 1  | 21,012,549 | 21,016,815  | 2 | 0 | 2 | 1 |
| Case 36 | 1  | 21,018,485 | 27,890,533  | 3 | 0 | 3 | 1 |
| Case 36 | 1  | 27,930,898 | 51,220,127  | 2 | 2 | 4 | 0 |
| Case 36 | 1  | 51,242,141 | 51,484,626  | 3 | 2 | 5 | 0 |
| Case 36 | 1  | 51,500,769 | 85,755,925  | 2 | 2 | 4 | 0 |
| Case 36 | 1  | 85,763,899 | 87,773,503  | 3 | 2 | 5 | 0 |
| Case 36 | 1  | 87,774,994 | 97,463,800  | 2 | 2 | 4 | 0 |
| Case 36 | 1  | 97,469,804 | 97,869,199  | 3 | 2 | 5 | 0 |
| Case 36 | 1  | 97,869,853 | 97,885,249  | 4 | 2 | 6 | 0 |
| Case 36 | 1  | 97,885,880 | 121,346,616 | 2 | 2 | 4 | 0 |

|         |   |             |             |   |   |   |   |
|---------|---|-------------|-------------|---|---|---|---|
| Case 36 | 1 | 142,649,718 | 156,565,413 | 2 | 2 | 4 | 0 |
| Case 36 | 1 | 156,566,111 | 156,639,215 | 3 | 2 | 5 | 0 |
| Case 36 | 1 | 156,639,277 | 161,398,984 | 2 | 2 | 4 | 0 |
| Case 36 | 1 | 161,406,056 | 161,512,848 | 3 | 0 | 3 | 1 |
| Case 36 | 1 | 161,514,566 | 167,226,854 | 2 | 2 | 4 | 0 |
| Case 36 | 1 | 167,233,474 | 167,715,940 | 3 | 2 | 5 | 0 |
| Case 36 | 1 | 167,722,003 | 169,005,304 | 4 | 0 | 4 | 1 |
| Case 36 | 1 | 169,012,985 | 169,035,485 | 6 | 0 | 6 | 1 |
| Case 36 | 1 | 169,041,144 | 169,049,881 | 5 | 0 | 5 | 1 |
| Case 36 | 1 | 169,056,077 | 184,027,676 | 4 | 0 | 4 | 1 |
| Case 36 | 1 | 184,031,561 | 185,103,113 | 3 | 0 | 3 | 1 |
| Case 36 | 1 | 185,109,202 | 185,211,545 | 2 | 0 | 2 | 1 |
| Case 36 | 1 | 185,212,686 | 186,163,076 | 3 | 0 | 3 | 1 |
| Case 36 | 1 | 186,164,899 | 186,704,555 | 4 | 0 | 4 | 1 |
| Case 36 | 1 | 186,722,430 | 187,530,283 | 3 | 0 | 3 | 1 |
| Case 36 | 1 | 187,531,027 | 187,817,247 | 2 | 0 | 2 | 1 |
| Case 36 | 1 | 187,823,537 | 187,832,346 | 3 | 0 | 3 | 1 |
| Case 36 | 1 | 187,834,475 | 189,478,530 | 4 | 0 | 4 | 1 |
| Case 36 | 1 | 189,478,630 | 189,491,402 | 3 | 0 | 3 | 1 |
| Case 36 | 1 | 189,496,667 | 192,366,691 | 2 | 0 | 2 | 1 |
| Case 36 | 1 | 192,370,110 | 193,932,788 | 3 | 0 | 3 | 1 |
| Case 36 | 1 | 193,933,715 | 197,069,766 | 2 | 0 | 2 | 1 |
| Case 36 | 1 | 197,069,857 | 197,073,885 | 3 | 0 | 3 | 1 |
| Case 36 | 1 | 197,073,932 | 197,874,949 | 2 | 0 | 2 | 1 |
| Case 36 | 1 | 197,876,319 | 198,474,448 | 3 | 0 | 3 | 1 |
| Case 36 | 1 | 198,480,661 | 198,521,135 | 2 | 0 | 2 | 1 |
| Case 36 | 1 | 198,528,106 | 198,601,197 | 3 | 0 | 3 | 1 |
| Case 36 | 1 | 198,607,328 | 199,438,213 | 2 | 0 | 2 | 1 |
| Case 36 | 1 | 199,441,521 | 200,534,248 | 3 | 0 | 3 | 1 |
| Case 36 | 1 | 200,534,255 | 200,577,276 | 2 | 0 | 2 | 1 |
| Case 36 | 1 | 200,580,831 | 203,232,771 | 3 | 0 | 3 | 1 |
| Case 36 | 1 | 203,238,568 | 205,236,233 | 4 | 0 | 4 | 1 |
| Case 36 | 1 | 205,240,198 | 215,955,515 | 3 | 0 | 3 | 1 |
| Case 36 | 1 | 215,955,937 | 215,999,616 | 2 | 0 | 2 | 1 |
| Case 36 | 1 | 216,003,557 | 216,054,086 | 3 | 0 | 3 | 1 |
| Case 36 | 1 | 216,055,286 | 216,172,740 | 2 | 0 | 2 | 1 |
| Case 36 | 1 | 216,173,866 | 216,246,607 | 3 | 0 | 3 | 1 |
| Case 36 | 1 | 216,249,570 | 216,413,725 | 2 | 0 | 2 | 1 |
| Case 36 | 1 | 216,417,675 | 216,633,391 | 3 | 0 | 3 | 1 |
| Case 36 | 1 | 216,634,428 | 216,770,716 | 2 | 0 | 2 | 1 |
| Case 36 | 1 | 216,771,649 | 216,848,771 | 3 | 0 | 3 | 1 |
| Case 36 | 1 | 216,850,733 | 216,965,834 | 2 | 0 | 2 | 1 |
| Case 36 | 1 | 216,966,601 | 217,835,210 | 3 | 0 | 3 | 1 |
| Case 36 | 1 | 217,842,887 | 218,044,052 | 2 | 0 | 2 | 1 |
| Case 36 | 1 | 218,047,636 | 220,151,999 | 3 | 0 | 3 | 1 |
| Case 36 | 1 | 220,152,863 | 220,356,104 | 2 | 0 | 2 | 1 |
| Case 36 | 1 | 220,356,245 | 225,146,988 | 3 | 0 | 3 | 1 |
| Case 36 | 1 | 225,147,932 | 225,538,052 | 2 | 0 | 2 | 1 |
| Case 36 | 1 | 225,539,363 | 227,750,068 | 3 | 0 | 3 | 1 |
| Case 36 | 1 | 227,753,072 | 227,918,562 | 2 | 0 | 2 | 1 |
| Case 36 | 1 | 227,920,061 | 228,496,066 | 3 | 0 | 3 | 1 |
| Case 36 | 1 | 228,496,905 | 228,509,475 | 2 | 0 | 2 | 1 |
| Case 36 | 1 | 228,509,555 | 228,557,698 | 3 | 0 | 3 | 1 |
| Case 36 | 1 | 228,557,710 | 228,566,387 | 2 | 0 | 2 | 1 |
| Case 36 | 1 | 228,568,159 | 231,483,670 | 3 | 0 | 3 | 1 |
| Case 36 | 1 | 231,485,731 | 231,572,255 | 2 | 0 | 2 | 1 |
| Case 36 | 1 | 231,579,172 | 233,436,403 | 3 | 0 | 3 | 1 |
| Case 36 | 1 | 233,437,866 | 233,484,687 | 2 | 0 | 2 | 1 |
| Case 36 | 1 | 233,489,499 | 235,324,510 | 3 | 0 | 3 | 1 |
| Case 36 | 1 | 235,325,570 | 235,403,741 | 2 | 0 | 2 | 1 |
| Case 36 | 1 | 235,456,271 | 235,832,555 | 3 | 0 | 3 | 1 |

|         |   |             |             |   |   |   |   |
|---------|---|-------------|-------------|---|---|---|---|
| Case 36 | 1 | 235,849,867 | 236,099,394 | 6 | 0 | 6 | 1 |
| Case 36 | 1 | 236,102,226 | 236,207,311 | 5 | 0 | 5 | 1 |
| Case 36 | 1 | 236,207,358 | 236,687,782 | 6 | 0 | 6 | 1 |
| Case 36 | 1 | 236,689,568 | 236,730,158 | 5 | 0 | 5 | 1 |
| Case 36 | 1 | 236,732,375 | 245,819,228 | 6 | 0 | 6 | 1 |
| Case 36 | 1 | 245,822,899 | 245,850,988 | 5 | 0 | 5 | 1 |
| Case 36 | 1 | 245,851,609 | 247,587,155 | 6 | 0 | 6 | 1 |
| Case 36 | 1 | 247,587,389 | 247,696,047 | 5 | 0 | 5 | 1 |
| Case 36 | 1 | 247,697,724 | 248,004,334 | 6 | 0 | 6 | 1 |
| Case 36 | 1 | 248,004,375 | 248,688,317 | 5 | 0 | 5 | 1 |
| Case 36 | 1 | 248,756,502 | 249,218,992 | 6 | 0 | 6 | 1 |
| Case 36 | 2 | 18,674      | 92,081,640  | 2 | 2 | 4 | 0 |
| Case 36 | 2 | 95,429,424  | 108,312,303 | 2 | 2 | 4 | 0 |
| Case 36 | 2 | 108,337,427 | 108,380,650 | 4 | 2 | 6 | 0 |
| Case 36 | 2 | 108,390,945 | 205,926,400 | 2 | 2 | 4 | 0 |
| Case 36 | 2 | 205,942,560 | 206,399,128 | 3 | 0 | 3 | 1 |
| Case 36 | 2 | 206,405,326 | 207,960,996 | 2 | 2 | 4 | 0 |
| Case 36 | 2 | 207,962,456 | 208,114,630 | 3 | 2 | 5 | 0 |
| Case 36 | 2 | 208,115,178 | 208,664,252 | 4 | 2 | 6 | 0 |
| Case 36 | 2 | 208,686,410 | 232,838,890 | 2 | 2 | 4 | 0 |
| Case 36 | 2 | 232,843,189 | 238,678,627 | 3 | 0 | 3 | 1 |
| Case 36 | 2 | 238,682,770 | 238,769,680 | 2 | 0 | 2 | 1 |
| Case 36 | 2 | 238,769,892 | 238,999,883 | 3 | 0 | 3 | 1 |
| Case 36 | 2 | 239,002,506 | 239,051,536 | 2 | 0 | 2 | 1 |
| Case 36 | 2 | 239,051,550 | 241,382,083 | 3 | 0 | 3 | 1 |
| Case 36 | 2 | 241,385,787 | 241,402,836 | 2 | 0 | 2 | 1 |
| Case 36 | 2 | 241,403,014 | 241,826,517 | 3 | 0 | 3 | 1 |
| Case 36 | 2 | 241,826,521 | 241,835,320 | 2 | 0 | 2 | 1 |
| Case 36 | 2 | 241,835,543 | 243,048,760 | 3 | 0 | 3 | 1 |
| Case 36 | 3 | 61,495      | 74,028,783  | 2 | 2 | 4 | 0 |
| Case 36 | 3 | 74,030,761  | 74,097,623  | 4 | 2 | 6 | 0 |
| Case 36 | 3 | 74,098,901  | 90,442,925  | 2 | 2 | 4 | 0 |
| Case 36 | 3 | 93,537,290  | 141,240,182 | 2 | 2 | 4 | 0 |
| Case 36 | 3 | 141,270,985 | 141,341,000 | 2 | 0 | 2 | 1 |
| Case 36 | 3 | 141,342,951 | 141,952,543 | 3 | 0 | 3 | 1 |
| Case 36 | 3 | 141,952,871 | 142,280,106 | 2 | 0 | 2 | 1 |
| Case 36 | 3 | 142,281,252 | 143,372,266 | 3 | 0 | 3 | 1 |
| Case 36 | 3 | 143,380,236 | 154,405,414 | 2 | 2 | 4 | 0 |
| Case 36 | 3 | 154,412,877 | 154,859,862 | 2 | 0 | 2 | 1 |
| Case 36 | 3 | 154,860,064 | 155,481,319 | 3 | 0 | 3 | 1 |
| Case 36 | 3 | 155,481,320 | 155,551,990 | 2 | 0 | 2 | 1 |
| Case 36 | 3 | 155,560,337 | 168,742,461 | 2 | 2 | 4 | 0 |
| Case 36 | 3 | 168,743,995 | 169,416,569 | 5 | 2 | 7 | 0 |
| Case 36 | 3 | 169,420,117 | 169,680,664 | 5 | 1 | 6 | 0 |
| Case 36 | 3 | 169,682,202 | 170,184,132 | 5 | 2 | 7 | 0 |
| Case 36 | 3 | 170,184,949 | 170,217,126 | 5 | 1 | 6 | 0 |
| Case 36 | 3 | 170,217,252 | 179,247,185 | 5 | 2 | 7 | 0 |
| Case 36 | 3 | 179,247,616 | 179,579,536 | 5 | 1 | 6 | 0 |
| Case 36 | 3 | 179,592,147 | 180,073,549 | 5 | 2 | 7 | 0 |
| Case 36 | 3 | 180,076,400 | 180,386,213 | 5 | 1 | 6 | 0 |
| Case 36 | 3 | 180,396,974 | 182,727,097 | 5 | 2 | 7 | 0 |
| Case 36 | 3 | 182,727,752 | 185,214,626 | 5 | 1 | 6 | 0 |
| Case 36 | 3 | 185,214,740 | 185,811,495 | 5 | 2 | 7 | 0 |
| Case 36 | 3 | 185,813,708 | 187,810,765 | 5 | 1 | 6 | 0 |
| Case 36 | 3 | 187,814,477 | 188,302,851 | 5 | 2 | 7 | 0 |
| Case 36 | 3 | 188,305,629 | 189,010,687 | 5 | 1 | 6 | 0 |
| Case 36 | 3 | 189,010,993 | 193,029,725 | 5 | 2 | 7 | 0 |
| Case 36 | 3 | 193,031,875 | 193,152,408 | 5 | 1 | 6 | 0 |
| Case 36 | 3 | 193,152,594 | 193,713,770 | 5 | 2 | 7 | 0 |
| Case 36 | 3 | 193,715,150 | 195,310,679 | 5 | 1 | 6 | 0 |
| Case 36 | 3 | 195,424,739 | 195,518,330 | 3 | 2 | 5 | 0 |

|         |   |             |             |   |   |   |   |
|---------|---|-------------|-------------|---|---|---|---|
| Case 36 | 3 | 195,519,857 | 197,838,262 | 5 | 1 | 6 | 0 |
| Case 36 | 4 | 71,566      | 20,493,434  | 4 | 0 | 4 | 1 |
| Case 36 | 4 | 20,495,135  | 20,599,796  | 3 | 0 | 3 | 1 |
| Case 36 | 4 | 20,601,311  | 20,731,737  | 2 | 0 | 2 | 1 |
| Case 36 | 4 | 20,732,334  | 25,119,575  | 3 | 0 | 3 | 1 |
| Case 36 | 4 | 25,123,344  | 25,203,905  | 2 | 0 | 2 | 1 |
| Case 36 | 4 | 25,204,724  | 25,707,422  | 3 | 0 | 3 | 1 |
| Case 36 | 4 | 25,717,754  | 25,717,754  | 1 | 1 | 2 | 0 |
| Case 36 | 4 | 25,721,489  | 25,734,246  | 0 | 0 | 0 | 0 |
| Case 36 | 4 | 25,740,206  | 25,758,995  | 1 | 1 | 2 | 0 |
| Case 36 | 4 | 25,759,334  | 27,592,104  | 3 | 0 | 3 | 1 |
| Case 36 | 4 | 27,595,859  | 30,633,334  | 2 | 0 | 2 | 1 |
| Case 36 | 4 | 30,633,835  | 31,306,116  | 3 | 0 | 3 | 1 |
| Case 36 | 4 | 31,313,352  | 35,870,854  | 2 | 0 | 2 | 1 |
| Case 36 | 4 | 35,873,240  | 36,118,703  | 3 | 0 | 3 | 1 |
| Case 36 | 4 | 36,119,788  | 36,250,842  | 2 | 0 | 2 | 1 |
| Case 36 | 4 | 36,260,279  | 36,979,771  | 3 | 0 | 3 | 1 |
| Case 36 | 4 | 36,980,142  | 37,091,905  | 2 | 0 | 2 | 1 |
| Case 36 | 4 | 37,094,678  | 37,949,311  | 3 | 0 | 3 | 1 |
| Case 36 | 4 | 37,955,351  | 37,970,850  | 4 | 0 | 4 | 1 |
| Case 36 | 4 | 37,971,275  | 39,162,457  | 3 | 0 | 3 | 1 |
| Case 36 | 4 | 39,174,790  | 39,257,482  | 2 | 0 | 2 | 1 |
| Case 36 | 4 | 39,263,814  | 40,122,771  | 3 | 0 | 3 | 1 |
| Case 36 | 4 | 40,122,958  | 40,154,495  | 2 | 0 | 2 | 1 |
| Case 36 | 4 | 40,158,464  | 43,192,298  | 3 | 0 | 3 | 1 |
| Case 36 | 4 | 43,197,962  | 43,502,330  | 2 | 0 | 2 | 1 |
| Case 36 | 4 | 43,520,590  | 43,786,489  | 3 | 0 | 3 | 1 |
| Case 36 | 4 | 43,791,881  | 44,785,999  | 2 | 0 | 2 | 1 |
| Case 36 | 4 | 44,802,221  | 44,955,964  | 3 | 0 | 3 | 1 |
| Case 36 | 4 | 44,964,929  | 46,055,478  | 2 | 0 | 2 | 1 |
| Case 36 | 4 | 46,072,596  | 46,447,918  | 3 | 0 | 3 | 1 |
| Case 36 | 4 | 46,455,805  | 47,282,643  | 2 | 0 | 2 | 1 |
| Case 36 | 4 | 47,284,233  | 47,421,325  | 3 | 0 | 3 | 1 |
| Case 36 | 4 | 47,427,873  | 47,544,012  | 2 | 0 | 2 | 1 |
| Case 36 | 4 | 47,544,947  | 48,490,939  | 3 | 0 | 3 | 1 |
| Case 36 | 4 | 48,491,010  | 48,910,970  | 2 | 0 | 2 | 1 |
| Case 36 | 4 | 48,912,028  | 49,620,898  | 3 | 0 | 3 | 1 |
| Case 36 | 4 | 52,697,856  | 52,728,640  | 3 | 0 | 3 | 1 |
| Case 36 | 4 | 52,729,610  | 52,765,500  | 2 | 0 | 2 | 1 |
| Case 36 | 4 | 52,778,163  | 56,308,687  | 3 | 0 | 3 | 1 |
| Case 36 | 4 | 56,309,862  | 56,466,734  | 2 | 0 | 2 | 1 |
| Case 36 | 4 | 56,468,485  | 56,786,831  | 3 | 0 | 3 | 1 |
| Case 36 | 4 | 56,789,617  | 56,886,856  | 2 | 0 | 2 | 1 |
| Case 36 | 4 | 56,886,891  | 59,275,372  | 3 | 0 | 3 | 1 |
| Case 36 | 4 | 59,279,104  | 62,585,789  | 2 | 0 | 2 | 1 |
| Case 36 | 4 | 62,586,313  | 62,761,464  | 3 | 0 | 3 | 1 |
| Case 36 | 4 | 62,766,445  | 62,895,592  | 2 | 0 | 2 | 1 |
| Case 36 | 4 | 62,911,349  | 63,331,949  | 3 | 0 | 3 | 1 |
| Case 36 | 4 | 63,338,415  | 67,774,097  | 2 | 0 | 2 | 1 |
| Case 36 | 4 | 67,802,992  | 68,472,604  | 3 | 0 | 3 | 1 |
| Case 36 | 4 | 68,480,525  | 68,791,400  | 2 | 0 | 2 | 1 |
| Case 36 | 4 | 68,795,290  | 68,964,683  | 3 | 0 | 3 | 1 |
| Case 36 | 4 | 68,964,724  | 69,833,099  | 2 | 0 | 2 | 1 |
| Case 36 | 4 | 69,850,452  | 70,341,550  | 3 | 0 | 3 | 1 |
| Case 36 | 4 | 70,345,608  | 70,716,627  | 2 | 0 | 2 | 1 |
| Case 36 | 4 | 70,718,005  | 70,756,086  | 3 | 0 | 3 | 1 |
| Case 36 | 4 | 70,759,142  | 71,045,118  | 2 | 0 | 2 | 1 |
| Case 36 | 4 | 71,046,288  | 72,338,589  | 3 | 0 | 3 | 1 |
| Case 36 | 4 | 72,338,684  | 72,481,753  | 2 | 0 | 2 | 1 |
| Case 36 | 4 | 72,497,189  | 74,300,880  | 3 | 0 | 3 | 1 |
| Case 36 | 4 | 74,301,313  | 74,464,386  | 2 | 0 | 2 | 1 |



|         |   |             |             |   |   |   |   |
|---------|---|-------------|-------------|---|---|---|---|
| Case 36 | 4 | 74,465,877  | 75,243,702  | 3 | 0 | 3 | 1 |
| Case 36 | 4 | 75,246,762  | 75,258,429  | 2 | 0 | 2 | 1 |
| Case 36 | 4 | 75,258,678  | 76,697,211  | 3 | 0 | 3 | 1 |
| Case 36 | 4 | 76,698,424  | 76,797,652  | 2 | 0 | 2 | 1 |
| Case 36 | 4 | 76,797,739  | 78,669,471  | 3 | 0 | 3 | 1 |
| Case 36 | 4 | 78,669,490  | 78,875,974  | 2 | 0 | 2 | 1 |
| Case 36 | 4 | 78,879,461  | 79,710,989  | 3 | 0 | 3 | 1 |
| Case 36 | 4 | 79,720,870  | 79,808,433  | 2 | 0 | 2 | 1 |
| Case 36 | 4 | 79,813,622  | 79,915,288  | 3 | 0 | 3 | 1 |
| Case 36 | 4 | 79,924,121  | 80,217,741  | 2 | 0 | 2 | 1 |
| Case 36 | 4 | 80,226,156  | 80,933,225  | 3 | 0 | 3 | 1 |
| Case 36 | 4 | 80,940,081  | 80,996,125  | 2 | 0 | 2 | 1 |
| Case 36 | 4 | 81,001,542  | 83,765,643  | 3 | 0 | 3 | 1 |
| Case 36 | 4 | 83,770,027  | 83,839,352  | 2 | 0 | 2 | 1 |
| Case 36 | 4 | 83,839,374  | 84,347,155  | 3 | 0 | 3 | 1 |
| Case 36 | 4 | 84,347,243  | 84,368,068  | 2 | 0 | 2 | 1 |
| Case 36 | 4 | 84,368,630  | 85,612,737  | 3 | 0 | 3 | 1 |
| Case 36 | 4 | 85,612,894  | 85,803,607  | 2 | 0 | 2 | 1 |
| Case 36 | 4 | 85,824,232  | 88,191,100  | 3 | 0 | 3 | 1 |
| Case 36 | 4 | 88,198,088  | 88,392,755  | 2 | 0 | 2 | 1 |
| Case 36 | 4 | 88,393,780  | 89,299,174  | 3 | 0 | 3 | 1 |
| Case 36 | 4 | 89,300,101  | 89,452,479  | 2 | 0 | 2 | 1 |
| Case 36 | 4 | 89,453,522  | 90,770,255  | 3 | 0 | 3 | 1 |
| Case 36 | 4 | 90,770,408  | 93,035,922  | 2 | 0 | 2 | 1 |
| Case 36 | 4 | 93,044,488  | 93,354,048  | 3 | 0 | 3 | 1 |
| Case 36 | 4 | 93,368,860  | 94,242,858  | 2 | 0 | 2 | 1 |
| Case 36 | 4 | 94,251,270  | 94,775,266  | 3 | 0 | 3 | 1 |
| Case 36 | 4 | 94,777,861  | 95,211,610  | 2 | 0 | 2 | 1 |
| Case 36 | 4 | 95,212,185  | 96,397,988  | 3 | 0 | 3 | 1 |
| Case 36 | 4 | 96,398,364  | 96,733,861  | 2 | 0 | 2 | 1 |
| Case 36 | 4 | 96,734,419  | 96,762,459  | 3 | 0 | 3 | 1 |
| Case 36 | 4 | 96,764,785  | 99,363,185  | 2 | 0 | 2 | 1 |
| Case 36 | 4 | 99,364,621  | 100,460,524 | 3 | 0 | 3 | 1 |
| Case 36 | 4 | 100,463,165 | 100,521,865 | 2 | 0 | 2 | 1 |
| Case 36 | 4 | 100,532,497 | 100,772,603 | 3 | 0 | 3 | 1 |
| Case 36 | 4 | 100,784,980 | 100,869,244 | 2 | 0 | 2 | 1 |
| Case 36 | 4 | 100,872,365 | 101,342,922 | 3 | 0 | 3 | 1 |
| Case 36 | 4 | 101,348,412 | 101,507,299 | 2 | 0 | 2 | 1 |
| Case 36 | 4 | 101,508,622 | 101,971,451 | 3 | 0 | 3 | 1 |
| Case 36 | 4 | 101,983,607 | 102,545,130 | 2 | 0 | 2 | 1 |
| Case 36 | 4 | 102,548,422 | 102,726,005 | 3 | 0 | 3 | 1 |
| Case 36 | 4 | 102,726,073 | 102,994,851 | 2 | 0 | 2 | 1 |
| Case 36 | 4 | 102,995,263 | 103,560,963 | 3 | 0 | 3 | 1 |
| Case 36 | 4 | 103,575,067 | 104,082,545 | 2 | 0 | 2 | 1 |
| Case 36 | 4 | 104,098,605 | 104,288,620 | 3 | 0 | 3 | 1 |
| Case 36 | 4 | 104,293,598 | 105,059,801 | 2 | 0 | 2 | 1 |
| Case 36 | 4 | 105,061,061 | 106,263,681 | 3 | 0 | 3 | 1 |
| Case 36 | 4 | 106,264,681 | 106,401,082 | 2 | 0 | 2 | 1 |
| Case 36 | 4 | 106,408,926 | 106,559,378 | 3 | 0 | 3 | 1 |
| Case 36 | 4 | 106,572,456 | 107,471,140 | 2 | 0 | 2 | 1 |
| Case 36 | 4 | 107,477,804 | 107,588,257 | 3 | 0 | 3 | 1 |
| Case 36 | 4 | 107,591,650 | 108,347,993 | 2 | 0 | 2 | 1 |
| Case 36 | 4 | 108,356,085 | 110,388,034 | 3 | 0 | 3 | 1 |
| Case 36 | 4 | 110,394,162 | 110,590,821 | 2 | 0 | 2 | 1 |
| Case 36 | 4 | 110,593,460 | 112,217,944 | 3 | 0 | 3 | 1 |
| Case 36 | 4 | 112,220,233 | 112,568,464 | 2 | 0 | 2 | 1 |
| Case 36 | 4 | 112,576,171 | 113,433,294 | 3 | 0 | 3 | 1 |
| Case 36 | 4 | 113,434,057 | 113,617,694 | 2 | 0 | 2 | 1 |
| Case 36 | 4 | 113,622,050 | 113,989,119 | 3 | 0 | 3 | 1 |
| Case 36 | 4 | 113,989,326 | 114,078,457 | 2 | 0 | 2 | 1 |
| Case 36 | 4 | 114,078,812 | 114,373,068 | 3 | 0 | 3 | 1 |

|         |   |             |             |   |   |   |   |
|---------|---|-------------|-------------|---|---|---|---|
| Case 36 | 4 | 114,373,255 | 114,734,812 | 2 | 0 | 2 | 1 |
| Case 36 | 4 | 114,736,267 | 115,605,064 | 3 | 0 | 3 | 1 |
| Case 36 | 4 | 115,607,637 | 116,074,054 | 2 | 0 | 2 | 1 |
| Case 36 | 4 | 116,074,962 | 116,291,436 | 3 | 0 | 3 | 1 |
| Case 36 | 4 | 116,316,085 | 118,650,042 | 2 | 0 | 2 | 1 |
| Case 36 | 4 | 118,651,823 | 120,063,715 | 3 | 0 | 3 | 1 |
| Case 36 | 4 | 120,067,244 | 120,159,334 | 2 | 0 | 2 | 1 |
| Case 36 | 4 | 120,166,520 | 120,946,927 | 3 | 0 | 3 | 1 |
| Case 36 | 4 | 120,952,246 | 121,539,450 | 2 | 0 | 2 | 1 |
| Case 36 | 4 | 121,545,138 | 122,350,537 | 3 | 0 | 3 | 1 |
| Case 36 | 4 | 122,353,707 | 122,429,378 | 2 | 0 | 2 | 1 |
| Case 36 | 4 | 122,430,844 | 122,744,067 | 3 | 0 | 3 | 1 |
| Case 36 | 4 | 122,747,017 | 122,805,872 | 2 | 0 | 2 | 1 |
| Case 36 | 4 | 122,806,228 | 123,027,723 | 3 | 0 | 3 | 1 |
| Case 36 | 4 | 123,049,637 | 123,368,516 | 2 | 0 | 2 | 1 |
| Case 36 | 4 | 123,370,387 | 124,810,078 | 3 | 0 | 3 | 1 |
| Case 36 | 4 | 124,812,897 | 125,020,390 | 2 | 0 | 2 | 1 |
| Case 36 | 4 | 125,034,218 | 125,465,163 | 3 | 0 | 3 | 1 |
| Case 36 | 4 | 125,475,882 | 125,526,281 | 2 | 0 | 2 | 1 |
| Case 36 | 4 | 125,531,787 | 125,675,055 | 3 | 0 | 3 | 1 |
| Case 36 | 4 | 125,683,296 | 126,237,751 | 2 | 0 | 2 | 1 |
| Case 36 | 4 | 126,238,090 | 126,242,519 | 3 | 0 | 3 | 1 |
| Case 36 | 4 | 126,252,650 | 126,319,772 | 2 | 0 | 2 | 1 |
| Case 36 | 4 | 126,320,038 | 126,434,087 | 3 | 0 | 3 | 1 |
| Case 36 | 4 | 126,435,279 | 127,529,033 | 2 | 0 | 2 | 1 |
| Case 36 | 4 | 127,529,360 | 127,610,903 | 3 | 0 | 3 | 1 |
| Case 36 | 4 | 127,622,803 | 128,125,715 | 2 | 0 | 2 | 1 |
| Case 36 | 4 | 128,132,034 | 128,651,726 | 3 | 0 | 3 | 1 |
| Case 36 | 4 | 128,651,914 | 129,131,153 | 2 | 0 | 2 | 1 |
| Case 36 | 4 | 129,131,162 | 129,793,559 | 3 | 0 | 3 | 1 |
| Case 36 | 4 | 129,796,506 | 130,093,303 | 2 | 0 | 2 | 1 |
| Case 36 | 4 | 130,095,095 | 130,412,286 | 3 | 0 | 3 | 1 |
| Case 36 | 4 | 130,412,508 | 134,040,641 | 2 | 0 | 2 | 1 |
| Case 36 | 4 | 134,046,930 | 134,074,058 | 3 | 0 | 3 | 1 |
| Case 36 | 4 | 134,076,153 | 138,413,244 | 2 | 0 | 2 | 1 |
| Case 36 | 4 | 138,415,363 | 138,455,637 | 3 | 0 | 3 | 1 |
| Case 36 | 4 | 138,459,997 | 138,939,662 | 2 | 0 | 2 | 1 |
| Case 36 | 4 | 138,943,184 | 139,153,535 | 3 | 0 | 3 | 1 |
| Case 36 | 4 | 139,155,804 | 139,249,761 | 2 | 0 | 2 | 1 |
| Case 36 | 4 | 139,253,392 | 141,237,134 | 3 | 0 | 3 | 1 |
| Case 36 | 4 | 141,246,800 | 141,464,721 | 2 | 0 | 2 | 1 |
| Case 36 | 4 | 141,465,244 | 143,634,746 | 3 | 0 | 3 | 1 |
| Case 36 | 4 | 143,639,211 | 143,827,182 | 2 | 0 | 2 | 1 |
| Case 36 | 4 | 143,835,306 | 144,106,782 | 3 | 0 | 3 | 1 |
| Case 36 | 4 | 144,114,413 | 144,193,117 | 2 | 0 | 2 | 1 |
| Case 36 | 4 | 144,193,695 | 144,950,193 | 3 | 0 | 3 | 1 |
| Case 36 | 4 | 144,965,891 | 145,035,868 | 2 | 0 | 2 | 1 |
| Case 36 | 4 | 145,040,841 | 145,434,744 | 3 | 0 | 3 | 1 |
| Case 36 | 4 | 145,436,324 | 145,761,160 | 2 | 0 | 2 | 1 |
| Case 36 | 4 | 145,770,167 | 148,554,421 | 3 | 0 | 3 | 1 |
| Case 36 | 4 | 148,555,511 | 148,727,355 | 2 | 0 | 2 | 1 |
| Case 36 | 4 | 148,733,764 | 150,202,672 | 3 | 0 | 3 | 1 |
| Case 36 | 4 | 150,205,408 | 150,459,436 | 2 | 0 | 2 | 1 |
| Case 36 | 4 | 150,473,832 | 151,210,761 | 3 | 0 | 3 | 1 |
| Case 36 | 4 | 151,214,038 | 151,901,433 | 2 | 0 | 2 | 1 |
| Case 36 | 4 | 151,918,331 | 153,252,061 | 3 | 0 | 3 | 1 |
| Case 36 | 4 | 153,267,968 | 153,482,738 | 2 | 0 | 2 | 1 |
| Case 36 | 4 | 153,485,919 | 155,430,666 | 3 | 0 | 3 | 1 |
| Case 36 | 4 | 155,432,944 | 155,487,143 | 2 | 0 | 2 | 1 |
| Case 36 | 4 | 155,487,644 | 155,507,382 | 3 | 0 | 3 | 1 |
| Case 36 | 4 | 155,508,627 | 155,526,029 | 2 | 0 | 2 | 1 |

|         |   |             |             |   |   |   |   |
|---------|---|-------------|-------------|---|---|---|---|
| Case 36 | 4 | 155,527,145 | 155,968,437 | 3 | 0 | 3 | 1 |
| Case 36 | 4 | 155,968,727 | 156,093,651 | 2 | 0 | 2 | 1 |
| Case 36 | 4 | 156,103,755 | 156,261,667 | 3 | 0 | 3 | 1 |
| Case 36 | 4 | 156,264,133 | 156,325,539 | 2 | 0 | 2 | 1 |
| Case 36 | 4 | 156,340,491 | 156,598,008 | 3 | 0 | 3 | 1 |
| Case 36 | 4 | 156,598,020 | 156,635,885 | 2 | 0 | 2 | 1 |
| Case 36 | 4 | 156,637,266 | 156,688,928 | 3 | 0 | 3 | 1 |
| Case 36 | 4 | 156,698,677 | 156,844,396 | 2 | 0 | 2 | 1 |
| Case 36 | 4 | 156,846,087 | 157,130,289 | 3 | 0 | 3 | 1 |
| Case 36 | 4 | 157,131,028 | 157,545,843 | 2 | 0 | 2 | 1 |
| Case 36 | 4 | 157,548,520 | 158,264,622 | 3 | 0 | 3 | 1 |
| Case 36 | 4 | 158,276,014 | 158,790,324 | 2 | 0 | 2 | 1 |
| Case 36 | 4 | 158,793,663 | 160,857,395 | 3 | 0 | 3 | 1 |
| Case 36 | 4 | 160,863,267 | 163,046,421 | 2 | 0 | 2 | 1 |
| Case 36 | 4 | 163,048,238 | 163,281,348 | 3 | 0 | 3 | 1 |
| Case 36 | 4 | 163,281,547 | 163,856,550 | 2 | 0 | 2 | 1 |
| Case 36 | 4 | 163,856,962 | 165,225,070 | 3 | 0 | 3 | 1 |
| Case 36 | 4 | 165,228,232 | 165,317,260 | 2 | 0 | 2 | 1 |
| Case 36 | 4 | 165,317,732 | 165,697,040 | 3 | 0 | 3 | 1 |
| Case 36 | 4 | 165,698,208 | 165,849,934 | 2 | 0 | 2 | 1 |
| Case 36 | 4 | 165,851,057 | 167,099,916 | 3 | 0 | 3 | 1 |
| Case 36 | 4 | 167,102,631 | 168,769,039 | 2 | 0 | 2 | 1 |
| Case 36 | 4 | 168,793,863 | 168,955,983 | 3 | 0 | 3 | 1 |
| Case 36 | 4 | 168,964,452 | 169,227,787 | 2 | 0 | 2 | 1 |
| Case 36 | 4 | 169,227,811 | 169,324,016 | 3 | 0 | 3 | 1 |
| Case 36 | 4 | 169,325,233 | 169,353,717 | 2 | 0 | 2 | 1 |
| Case 36 | 4 | 169,358,017 | 170,312,589 | 3 | 0 | 3 | 1 |
| Case 36 | 4 | 170,314,951 | 170,737,119 | 2 | 0 | 2 | 1 |
| Case 36 | 4 | 170,740,266 | 171,663,745 | 3 | 0 | 3 | 1 |
| Case 36 | 4 | 171,666,694 | 173,535,503 | 2 | 0 | 2 | 1 |
| Case 36 | 4 | 173,541,374 | 175,149,943 | 3 | 0 | 3 | 1 |
| Case 36 | 4 | 175,150,481 | 175,486,220 | 2 | 0 | 2 | 1 |
| Case 36 | 4 | 175,491,648 | 175,610,550 | 3 | 0 | 3 | 1 |
| Case 36 | 4 | 175,615,500 | 175,838,816 | 2 | 0 | 2 | 1 |
| Case 36 | 4 | 175,839,432 | 176,018,734 | 3 | 0 | 3 | 1 |
| Case 36 | 4 | 176,022,589 | 176,610,969 | 2 | 0 | 2 | 1 |
| Case 36 | 4 | 176,612,351 | 177,006,043 | 3 | 0 | 3 | 1 |
| Case 36 | 4 | 177,006,484 | 177,190,115 | 2 | 0 | 2 | 1 |
| Case 36 | 4 | 177,190,117 | 177,478,482 | 3 | 0 | 3 | 1 |
| Case 36 | 4 | 177,481,511 | 177,928,041 | 2 | 0 | 2 | 1 |
| Case 36 | 4 | 177,952,118 | 178,793,689 | 3 | 0 | 3 | 1 |
| Case 36 | 4 | 178,793,878 | 180,056,687 | 2 | 0 | 2 | 1 |
| Case 36 | 4 | 180,063,431 | 180,298,293 | 3 | 0 | 3 | 1 |
| Case 36 | 4 | 180,302,451 | 180,716,739 | 2 | 0 | 2 | 1 |
| Case 36 | 4 | 180,718,982 | 180,819,809 | 3 | 0 | 3 | 1 |
| Case 36 | 4 | 180,822,313 | 181,108,510 | 2 | 0 | 2 | 1 |
| Case 36 | 4 | 181,118,760 | 181,215,239 | 3 | 0 | 3 | 1 |
| Case 36 | 4 | 181,215,806 | 181,636,440 | 2 | 0 | 2 | 1 |
| Case 36 | 4 | 181,637,915 | 181,850,257 | 3 | 0 | 3 | 1 |
| Case 36 | 4 | 181,851,323 | 181,928,515 | 2 | 0 | 2 | 1 |
| Case 36 | 4 | 181,929,211 | 183,484,147 | 3 | 0 | 3 | 1 |
| Case 36 | 4 | 183,486,609 | 183,618,777 | 2 | 0 | 2 | 1 |
| Case 36 | 4 | 183,622,901 | 184,587,424 | 3 | 0 | 3 | 1 |
| Case 36 | 4 | 184,588,121 | 184,634,741 | 2 | 0 | 2 | 1 |
| Case 36 | 4 | 184,638,760 | 185,569,730 | 3 | 0 | 3 | 1 |
| Case 36 | 4 | 185,571,557 | 185,650,154 | 2 | 0 | 2 | 1 |
| Case 36 | 4 | 185,650,821 | 186,320,906 | 3 | 0 | 3 | 1 |
| Case 36 | 4 | 186,322,002 | 186,380,893 | 2 | 0 | 2 | 1 |
| Case 36 | 4 | 186,381,043 | 189,812,524 | 3 | 0 | 3 | 1 |
| Case 36 | 4 | 189,813,964 | 189,952,149 | 2 | 0 | 2 | 1 |
| Case 36 | 4 | 189,957,977 | 190,963,766 | 3 | 0 | 3 | 1 |

|         |   |            |            |   |   |   |   |
|---------|---|------------|------------|---|---|---|---|
| Case 36 | 5 | 38,139     | 3,991,294  | 3 | 2 | 5 | 0 |
| Case 36 | 5 | 3,992,147  | 4,474,589  | 5 | 2 | 7 | 0 |
| Case 36 | 5 | 4,478,547  | 4,946,412  | 5 | 1 | 6 | 0 |
| Case 36 | 5 | 4,948,424  | 5,235,201  | 5 | 2 | 7 | 0 |
| Case 36 | 5 | 5,235,252  | 6,922,386  | 5 | 1 | 6 | 0 |
| Case 36 | 5 | 6,940,857  | 7,815,809  | 5 | 2 | 7 | 0 |
| Case 36 | 5 | 7,816,645  | 7,835,572  | 5 | 1 | 6 | 0 |
| Case 36 | 5 | 7,837,861  | 7,866,822  | 5 | 2 | 7 | 0 |
| Case 36 | 5 | 7,866,906  | 7,901,230  | 5 | 1 | 6 | 0 |
| Case 36 | 5 | 7,909,907  | 10,226,839 | 5 | 2 | 7 | 0 |
| Case 36 | 5 | 10,227,548 | 10,852,652 | 5 | 1 | 6 | 0 |
| Case 36 | 5 | 10,853,693 | 10,965,031 | 5 | 2 | 7 | 0 |
| Case 36 | 5 | 10,968,872 | 11,380,155 | 5 | 1 | 6 | 0 |
| Case 36 | 5 | 11,381,138 | 13,752,311 | 5 | 2 | 7 | 0 |
| Case 36 | 5 | 13,754,312 | 14,533,529 | 5 | 1 | 6 | 0 |
| Case 36 | 5 | 14,534,994 | 16,491,052 | 5 | 2 | 7 | 0 |
| Case 36 | 5 | 16,500,790 | 16,834,568 | 5 | 1 | 6 | 0 |
| Case 36 | 5 | 16,836,005 | 18,529,071 | 5 | 2 | 7 | 0 |
| Case 36 | 5 | 18,532,785 | 18,548,150 | 5 | 1 | 6 | 0 |
| Case 36 | 5 | 18,561,967 | 24,868,417 | 3 | 2 | 5 | 0 |
| Case 36 | 5 | 24,868,444 | 27,424,981 | 2 | 2 | 4 | 0 |
| Case 36 | 5 | 27,447,863 | 36,473,237 | 3 | 2 | 5 | 0 |
| Case 36 | 5 | 36,479,022 | 36,895,270 | 4 | 2 | 6 | 0 |
| Case 36 | 5 | 36,900,843 | 46,399,093 | 3 | 2 | 5 | 0 |
| Case 36 | 5 | 49,457,282 | 54,104,560 | 3 | 2 | 5 | 0 |
| Case 36 | 5 | 54,118,833 | 54,603,822 | 3 | 0 | 3 | 1 |
| Case 36 | 5 | 54,608,958 | 54,685,496 | 2 | 0 | 2 | 1 |
| Case 36 | 5 | 54,696,117 | 58,543,332 | 3 | 0 | 3 | 1 |
| Case 36 | 5 | 58,545,163 | 58,588,629 | 2 | 0 | 2 | 1 |
| Case 36 | 5 | 58,589,499 | 60,127,724 | 3 | 0 | 3 | 1 |
| Case 36 | 5 | 60,135,985 | 60,455,923 | 2 | 0 | 2 | 1 |
| Case 36 | 5 | 60,455,968 | 61,566,896 | 3 | 0 | 3 | 1 |
| Case 36 | 5 | 61,585,240 | 61,769,985 | 1 | 1 | 2 | 0 |
| Case 36 | 5 | 61,772,530 | 61,772,569 | 0 | 0 | 0 | 0 |
| Case 36 | 5 | 61,779,069 | 61,832,574 | 1 | 1 | 2 | 0 |
| Case 36 | 5 | 61,854,650 | 64,484,802 | 3 | 0 | 3 | 1 |
| Case 36 | 5 | 64,485,563 | 64,965,900 | 2 | 0 | 2 | 1 |
| Case 36 | 5 | 64,968,615 | 65,288,668 | 3 | 0 | 3 | 1 |
| Case 36 | 5 | 65,288,791 | 65,349,563 | 2 | 0 | 2 | 1 |
| Case 36 | 5 | 65,349,671 | 70,805,292 | 3 | 0 | 3 | 1 |
| Case 36 | 5 | 70,805,429 | 70,860,663 | 2 | 0 | 2 | 1 |
| Case 36 | 5 | 70,862,059 | 71,930,656 | 3 | 0 | 3 | 1 |
| Case 36 | 5 | 71,954,583 | 72,385,914 | 2 | 0 | 2 | 1 |
| Case 36 | 5 | 72,386,139 | 74,034,400 | 3 | 0 | 3 | 1 |
| Case 36 | 5 | 74,034,453 | 74,073,542 | 2 | 0 | 2 | 1 |
| Case 36 | 5 | 74,076,210 | 74,869,748 | 3 | 0 | 3 | 1 |
| Case 36 | 5 | 74,872,656 | 74,898,752 | 2 | 0 | 2 | 1 |
| Case 36 | 5 | 74,907,412 | 74,967,386 | 3 | 0 | 3 | 1 |
| Case 36 | 5 | 74,969,415 | 75,008,702 | 2 | 0 | 2 | 1 |
| Case 36 | 5 | 75,014,916 | 75,856,455 | 3 | 0 | 3 | 1 |
| Case 36 | 5 | 75,860,695 | 75,913,366 | 2 | 0 | 2 | 1 |
| Case 36 | 5 | 75,913,784 | 76,319,894 | 3 | 0 | 3 | 1 |
| Case 36 | 5 | 76,321,495 | 76,355,468 | 2 | 0 | 2 | 1 |
| Case 36 | 5 | 76,355,524 | 76,736,793 | 3 | 0 | 3 | 1 |
| Case 36 | 5 | 76,738,927 | 76,760,080 | 2 | 0 | 2 | 1 |
| Case 36 | 5 | 76,760,612 | 77,277,337 | 3 | 0 | 3 | 1 |
| Case 36 | 5 | 77,278,872 | 77,773,152 | 2 | 0 | 2 | 1 |
| Case 36 | 5 | 77,782,912 | 79,732,608 | 3 | 0 | 3 | 1 |
| Case 36 | 5 | 79,732,631 | 79,812,343 | 2 | 0 | 2 | 1 |
| Case 36 | 5 | 79,815,529 | 80,012,251 | 3 | 0 | 3 | 1 |
| Case 36 | 5 | 80,016,874 | 80,203,678 | 2 | 0 | 2 | 1 |

|         |   |             |             |   |   |   |   |
|---------|---|-------------|-------------|---|---|---|---|
| Case 36 | 5 | 80,206,473  | 82,383,876  | 3 | 0 | 3 | 1 |
| Case 36 | 5 | 82,393,549  | 82,673,517  | 2 | 0 | 2 | 1 |
| Case 36 | 5 | 82,673,682  | 82,934,554  | 3 | 0 | 3 | 1 |
| Case 36 | 5 | 82,935,601  | 83,034,211  | 2 | 0 | 2 | 1 |
| Case 36 | 5 | 83,036,792  | 83,508,667  | 3 | 0 | 3 | 1 |
| Case 36 | 5 | 83,511,806  | 83,981,802  | 2 | 0 | 2 | 1 |
| Case 36 | 5 | 83,983,783  | 83,988,022  | 3 | 2 | 5 | 0 |
| Case 36 | 5 | 84,003,689  | 85,960,197  | 2 | 0 | 2 | 1 |
| Case 36 | 5 | 85,961,838  | 86,078,660  | 3 | 0 | 3 | 1 |
| Case 36 | 5 | 86,081,015  | 86,155,255  | 2 | 0 | 2 | 1 |
| Case 36 | 5 | 86,158,455  | 86,539,266  | 3 | 0 | 3 | 1 |
| Case 36 | 5 | 86,540,308  | 87,318,551  | 2 | 0 | 2 | 1 |
| Case 36 | 5 | 87,342,183  | 88,184,003  | 3 | 0 | 3 | 1 |
| Case 36 | 5 | 88,186,469  | 88,416,354  | 2 | 0 | 2 | 1 |
| Case 36 | 5 | 88,421,363  | 89,546,109  | 3 | 0 | 3 | 1 |
| Case 36 | 5 | 89,550,034  | 89,731,013  | 2 | 0 | 2 | 1 |
| Case 36 | 5 | 89,737,187  | 89,897,229  | 3 | 0 | 3 | 1 |
| Case 36 | 5 | 89,907,016  | 89,940,528  | 2 | 0 | 2 | 1 |
| Case 36 | 5 | 89,943,433  | 89,994,983  | 3 | 0 | 3 | 1 |
| Case 36 | 5 | 89,999,487  | 90,041,590  | 2 | 0 | 2 | 1 |
| Case 36 | 5 | 90,043,898  | 90,826,101  | 3 | 0 | 3 | 1 |
| Case 36 | 5 | 90,830,449  | 91,489,217  | 2 | 0 | 2 | 1 |
| Case 36 | 5 | 91,499,442  | 92,849,721  | 3 | 0 | 3 | 1 |
| Case 36 | 5 | 92,873,527  | 93,305,352  | 2 | 0 | 2 | 1 |
| Case 36 | 5 | 93,311,456  | 93,780,422  | 3 | 0 | 3 | 1 |
| Case 36 | 5 | 93,783,739  | 94,149,017  | 2 | 0 | 2 | 1 |
| Case 36 | 5 | 94,150,212  | 94,772,576  | 3 | 0 | 3 | 1 |
| Case 36 | 5 | 94,778,703  | 94,957,045  | 2 | 0 | 2 | 1 |
| Case 36 | 5 | 94,959,876  | 95,234,350  | 3 | 0 | 3 | 1 |
| Case 36 | 5 | 95,234,485  | 95,268,768  | 2 | 0 | 2 | 1 |
| Case 36 | 5 | 95,277,555  | 97,099,320  | 3 | 0 | 3 | 1 |
| Case 36 | 5 | 97,108,559  | 97,247,756  | 2 | 0 | 2 | 1 |
| Case 36 | 5 | 97,248,326  | 98,131,505  | 3 | 0 | 3 | 1 |
| Case 36 | 5 | 98,131,883  | 98,275,197  | 2 | 0 | 2 | 1 |
| Case 36 | 5 | 98,286,819  | 98,888,857  | 3 | 0 | 3 | 1 |
| Case 36 | 5 | 98,899,755  | 99,269,809  | 2 | 0 | 2 | 1 |
| Case 36 | 5 | 99,270,055  | 99,479,714  | 3 | 0 | 3 | 1 |
| Case 36 | 5 | 99,484,502  | 100,822,258 | 2 | 0 | 2 | 1 |
| Case 36 | 5 | 100,832,707 | 100,948,545 | 3 | 0 | 3 | 1 |
| Case 36 | 5 | 100,950,902 | 101,780,913 | 2 | 0 | 2 | 1 |
| Case 36 | 5 | 101,782,930 | 102,353,284 | 3 | 0 | 3 | 1 |
| Case 36 | 5 | 102,364,597 | 102,722,346 | 2 | 0 | 2 | 1 |
| Case 36 | 5 | 102,725,095 | 103,269,694 | 3 | 0 | 3 | 1 |
| Case 36 | 5 | 103,270,358 | 105,575,013 | 2 | 0 | 2 | 1 |
| Case 36 | 5 | 105,590,047 | 106,090,828 | 3 | 0 | 3 | 1 |
| Case 36 | 5 | 106,094,581 | 106,358,541 | 2 | 0 | 2 | 1 |
| Case 36 | 5 | 106,359,882 | 106,971,568 | 3 | 0 | 3 | 1 |
| Case 36 | 5 | 106,979,252 | 107,052,000 | 2 | 0 | 2 | 1 |
| Case 36 | 5 | 107,065,898 | 108,076,725 | 3 | 0 | 3 | 1 |
| Case 36 | 5 | 108,082,616 | 108,489,944 | 2 | 0 | 2 | 1 |
| Case 36 | 5 | 108,502,493 | 109,049,221 | 3 | 0 | 3 | 1 |
| Case 36 | 5 | 109,049,233 | 109,204,024 | 2 | 0 | 2 | 1 |
| Case 36 | 5 | 109,209,323 | 109,452,238 | 3 | 0 | 3 | 1 |
| Case 36 | 5 | 109,462,521 | 110,092,412 | 2 | 0 | 2 | 1 |
| Case 36 | 5 | 110,093,673 | 110,352,447 | 3 | 0 | 3 | 1 |
| Case 36 | 5 | 110,355,405 | 110,478,926 | 2 | 0 | 2 | 1 |
| Case 36 | 5 | 110,481,203 | 112,007,180 | 3 | 0 | 3 | 1 |
| Case 36 | 5 | 112,008,440 | 112,164,561 | 2 | 0 | 2 | 1 |
| Case 36 | 5 | 112,170,729 | 112,848,767 | 3 | 0 | 3 | 1 |
| Case 36 | 5 | 112,849,608 | 112,977,399 | 2 | 0 | 2 | 1 |
| Case 36 | 5 | 112,979,910 | 115,423,531 | 3 | 0 | 3 | 1 |

|         |   |             |             |   |   |   |   |
|---------|---|-------------|-------------|---|---|---|---|
| Case 36 | 5 | 115,425,203 | 115,547,937 | 2 | 0 | 2 | 1 |
| Case 36 | 5 | 115,548,435 | 117,239,768 | 3 | 0 | 3 | 1 |
| Case 36 | 5 | 117,241,490 | 117,610,910 | 2 | 0 | 2 | 1 |
| Case 36 | 5 | 117,612,080 | 118,485,949 | 3 | 0 | 3 | 1 |
| Case 36 | 5 | 118,487,729 | 118,530,872 | 2 | 0 | 2 | 1 |
| Case 36 | 5 | 118,532,034 | 119,635,847 | 3 | 0 | 3 | 1 |
| Case 36 | 5 | 119,636,391 | 119,950,084 | 2 | 0 | 2 | 1 |
| Case 36 | 5 | 119,951,494 | 120,183,320 | 3 | 0 | 3 | 1 |
| Case 36 | 5 | 120,198,311 | 120,328,270 | 2 | 0 | 2 | 1 |
| Case 36 | 5 | 120,331,625 | 120,369,695 | 3 | 0 | 3 | 1 |
| Case 36 | 5 | 120,371,760 | 121,418,545 | 2 | 0 | 2 | 1 |
| Case 36 | 5 | 121,419,259 | 124,217,262 | 3 | 0 | 3 | 1 |
| Case 36 | 5 | 124,222,305 | 124,254,518 | 2 | 0 | 2 | 1 |
| Case 36 | 5 | 124,257,374 | 125,007,623 | 3 | 0 | 3 | 1 |
| Case 36 | 5 | 125,008,619 | 125,137,593 | 2 | 0 | 2 | 1 |
| Case 36 | 5 | 125,139,660 | 128,302,288 | 3 | 0 | 3 | 1 |
| Case 36 | 5 | 128,302,850 | 128,400,356 | 2 | 0 | 2 | 1 |
| Case 36 | 5 | 128,404,226 | 128,760,076 | 3 | 0 | 3 | 1 |
| Case 36 | 5 | 128,768,047 | 130,091,947 | 2 | 0 | 2 | 1 |
| Case 36 | 5 | 130,096,260 | 131,008,086 | 3 | 0 | 3 | 1 |
| Case 36 | 5 | 131,008,194 | 131,294,966 | 2 | 0 | 2 | 1 |
| Case 36 | 5 | 131,296,236 | 131,915,612 | 3 | 0 | 3 | 1 |
| Case 36 | 5 | 131,915,673 | 131,953,850 | 2 | 0 | 2 | 1 |
| Case 36 | 5 | 131,965,179 | 135,272,418 | 3 | 0 | 3 | 1 |
| Case 36 | 5 | 135,272,474 | 135,276,319 | 2 | 0 | 2 | 1 |
| Case 36 | 5 | 135,276,701 | 137,226,344 | 3 | 0 | 3 | 1 |
| Case 36 | 5 | 137,228,219 | 137,259,179 | 2 | 0 | 2 | 1 |
| Case 36 | 5 | 137,260,747 | 139,931,617 | 3 | 0 | 3 | 1 |
| Case 36 | 5 | 139,931,618 | 139,931,652 | 2 | 0 | 2 | 1 |
| Case 36 | 5 | 139,931,653 | 142,639,062 | 3 | 0 | 3 | 1 |
| Case 36 | 5 | 142,640,901 | 142,779,000 | 2 | 0 | 2 | 1 |
| Case 36 | 5 | 142,779,317 | 148,870,100 | 3 | 0 | 3 | 1 |
| Case 36 | 5 | 148,873,854 | 148,978,105 | 2 | 0 | 2 | 1 |
| Case 36 | 5 | 148,980,675 | 150,253,104 | 3 | 0 | 3 | 1 |
| Case 36 | 5 | 150,254,041 | 150,277,111 | 2 | 0 | 2 | 1 |
| Case 36 | 5 | 150,278,587 | 161,248,654 | 3 | 0 | 3 | 1 |
| Case 36 | 5 | 161,259,369 | 161,536,928 | 2 | 0 | 2 | 1 |
| Case 36 | 5 | 161,537,130 | 162,426,738 | 3 | 0 | 3 | 1 |
| Case 36 | 5 | 162,440,022 | 162,748,604 | 2 | 0 | 2 | 1 |
| Case 36 | 5 | 162,750,370 | 162,867,195 | 3 | 0 | 3 | 1 |
| Case 36 | 5 | 162,868,171 | 162,973,665 | 2 | 0 | 2 | 1 |
| Case 36 | 5 | 162,977,152 | 163,533,508 | 3 | 0 | 3 | 1 |
| Case 36 | 5 | 163,541,120 | 164,461,215 | 2 | 0 | 2 | 1 |
| Case 36 | 5 | 164,462,079 | 164,695,671 | 3 | 0 | 3 | 1 |
| Case 36 | 5 | 164,696,018 | 165,017,751 | 2 | 0 | 2 | 1 |
| Case 36 | 5 | 165,022,916 | 165,087,285 | 3 | 0 | 3 | 1 |
| Case 36 | 5 | 165,093,364 | 165,582,883 | 2 | 0 | 2 | 1 |
| Case 36 | 5 | 165,587,047 | 165,752,952 | 3 | 0 | 3 | 1 |
| Case 36 | 5 | 165,753,097 | 166,089,387 | 2 | 0 | 2 | 1 |
| Case 36 | 5 | 166,093,550 | 169,014,301 | 3 | 0 | 3 | 1 |
| Case 36 | 5 | 169,015,433 | 169,026,043 | 2 | 0 | 2 | 1 |
| Case 36 | 5 | 169,028,316 | 170,283,091 | 3 | 0 | 3 | 1 |
| Case 36 | 5 | 170,305,138 | 170,467,972 | 2 | 0 | 2 | 1 |
| Case 36 | 5 | 170,499,222 | 177,905,384 | 3 | 0 | 3 | 1 |
| Case 36 | 5 | 177,906,089 | 180,693,127 | 4 | 0 | 4 | 1 |
| Case 36 | 6 | 108,666     | 256,281     | 3 | 0 | 3 | 1 |
| Case 36 | 6 | 274,847     | 378,970     | 4 | 0 | 4 | 1 |
| Case 36 | 6 | 380,341     | 4,986,250   | 3 | 0 | 3 | 1 |
| Case 36 | 6 | 4,991,024   | 5,000,840   | 2 | 0 | 2 | 1 |
| Case 36 | 6 | 5,002,737   | 5,534,271   | 3 | 0 | 3 | 1 |
| Case 36 | 6 | 5,541,761   | 5,567,978   | 2 | 0 | 2 | 1 |

|         |   |            |            |   |   |   |   |
|---------|---|------------|------------|---|---|---|---|
| Case 36 | 6 | 5,568,083  | 6,677,443  | 3 | 0 | 3 | 1 |
| Case 36 | 6 | 6,679,166  | 6,684,357  | 4 | 0 | 4 | 1 |
| Case 36 | 6 | 6,692,142  | 6,823,174  | 1 | 0 | 1 | 0 |
| Case 36 | 6 | 6,824,153  | 6,834,674  | 4 | 0 | 4 | 1 |
| Case 36 | 6 | 6,836,159  | 7,357,849  | 3 | 0 | 3 | 1 |
| Case 36 | 6 | 7,365,727  | 7,424,510  | 2 | 0 | 2 | 1 |
| Case 36 | 6 | 7,427,198  | 8,380,193  | 3 | 0 | 3 | 1 |
| Case 36 | 6 | 8,381,005  | 8,546,104  | 2 | 0 | 2 | 1 |
| Case 36 | 6 | 8,555,544  | 9,142,017  | 3 | 0 | 3 | 1 |
| Case 36 | 6 | 9,142,208  | 9,479,015  | 2 | 0 | 2 | 1 |
| Case 36 | 6 | 9,479,371  | 11,664,422 | 3 | 0 | 3 | 1 |
| Case 36 | 6 | 11,667,796 | 11,667,796 | 4 | 0 | 4 | 1 |
| Case 36 | 6 | 11,677,538 | 12,163,831 | 1 | 0 | 1 | 0 |
| Case 36 | 6 | 12,164,224 | 12,164,348 | 4 | 0 | 4 | 1 |
| Case 36 | 6 | 12,164,456 | 12,616,996 | 1 | 0 | 1 | 0 |
| Case 36 | 6 | 12,618,970 | 12,618,970 | 4 | 0 | 4 | 1 |
| Case 36 | 6 | 12,627,866 | 13,343,257 | 3 | 0 | 3 | 1 |
| Case 36 | 6 | 13,343,870 | 13,727,788 | 2 | 0 | 2 | 1 |
| Case 36 | 6 | 13,733,565 | 14,579,439 | 3 | 0 | 3 | 1 |
| Case 36 | 6 | 14,579,707 | 14,614,112 | 2 | 0 | 2 | 1 |
| Case 36 | 6 | 14,615,489 | 15,539,010 | 3 | 0 | 3 | 1 |
| Case 36 | 6 | 15,546,213 | 15,819,455 | 2 | 0 | 2 | 1 |
| Case 36 | 6 | 15,820,425 | 16,795,923 | 3 | 0 | 3 | 1 |
| Case 36 | 6 | 16,796,614 | 16,819,108 | 2 | 0 | 2 | 1 |
| Case 36 | 6 | 16,821,679 | 17,102,858 | 3 | 0 | 3 | 1 |
| Case 36 | 6 | 17,103,517 | 17,426,858 | 2 | 0 | 2 | 1 |
| Case 36 | 6 | 17,427,133 | 17,507,935 | 3 | 0 | 3 | 1 |
| Case 36 | 6 | 17,510,429 | 17,706,404 | 2 | 0 | 2 | 1 |
| Case 36 | 6 | 17,706,524 | 18,119,477 | 3 | 0 | 3 | 1 |
| Case 36 | 6 | 18,121,314 | 18,157,968 | 2 | 0 | 2 | 1 |
| Case 36 | 6 | 18,161,559 | 18,791,723 | 3 | 0 | 3 | 1 |
| Case 36 | 6 | 18,793,472 | 19,966,473 | 2 | 0 | 2 | 1 |
| Case 36 | 6 | 19,966,649 | 20,482,411 | 3 | 0 | 3 | 1 |
| Case 36 | 6 | 20,485,898 | 21,212,926 | 2 | 0 | 2 | 1 |
| Case 36 | 6 | 21,213,307 | 22,818,550 | 3 | 0 | 3 | 1 |
| Case 36 | 6 | 22,825,009 | 23,027,242 | 2 | 0 | 2 | 1 |
| Case 36 | 6 | 23,029,696 | 24,353,742 | 3 | 0 | 3 | 1 |
| Case 36 | 6 | 24,354,045 | 24,404,405 | 2 | 0 | 2 | 1 |
| Case 36 | 6 | 24,405,120 | 26,010,881 | 3 | 0 | 3 | 1 |
| Case 36 | 6 | 26,016,462 | 26,027,135 | 3 | 2 | 5 | 0 |
| Case 36 | 6 | 26,027,306 | 26,598,188 | 4 | 0 | 4 | 1 |
| Case 36 | 6 | 26,598,418 | 27,277,665 | 3 | 2 | 5 | 0 |
| Case 36 | 6 | 27,277,716 | 27,879,715 | 2 | 2 | 4 | 0 |
| Case 36 | 6 | 27,879,869 | 28,026,077 | 3 | 2 | 5 | 0 |
| Case 36 | 6 | 28,027,688 | 28,251,925 | 2 | 2 | 4 | 0 |
| Case 36 | 6 | 28,252,859 | 29,364,325 | 3 | 2 | 5 | 0 |
| Case 36 | 6 | 29,364,508 | 29,456,654 | 4 | 0 | 4 | 1 |
| Case 36 | 6 | 29,458,241 | 29,458,241 | 6 | 0 | 6 | 1 |
| Case 36 | 6 | 29,458,477 | 29,913,542 | 5 | 0 | 5 | 1 |
| Case 36 | 6 | 29,913,727 | 29,938,258 | 4 | 0 | 4 | 1 |
| Case 36 | 6 | 29,938,777 | 29,938,777 | 6 | 0 | 6 | 1 |
| Case 36 | 6 | 29,938,932 | 30,633,323 | 5 | 0 | 5 | 1 |
| Case 36 | 6 | 30,633,377 | 30,712,298 | 4 | 0 | 4 | 1 |
| Case 36 | 6 | 30,712,327 | 31,084,787 | 3 | 2 | 5 | 0 |
| Case 36 | 6 | 31,084,792 | 31,128,552 | 2 | 2 | 4 | 0 |
| Case 36 | 6 | 31,129,265 | 31,356,574 | 3 | 2 | 5 | 0 |
| Case 36 | 6 | 31,360,255 | 31,453,640 | 2 | 0 | 2 | 1 |
| Case 36 | 6 | 31,456,567 | 31,734,345 | 3 | 2 | 5 | 0 |
| Case 36 | 6 | 31,734,367 | 31,807,489 | 2 | 2 | 4 | 0 |
| Case 36 | 6 | 31,807,540 | 31,996,614 | 3 | 2 | 5 | 0 |
| Case 36 | 6 | 32,005,904 | 32,165,201 | 2 | 2 | 4 | 0 |

|         |   |             |             |   |   |   |   |
|---------|---|-------------|-------------|---|---|---|---|
| Case 36 | 6 | 32,165,300  | 33,026,246  | 3 | 2 | 5 | 0 |
| Case 36 | 6 | 33,030,112  | 33,429,952  | 4 | 0 | 4 | 1 |
| Case 36 | 6 | 33,430,950  | 41,533,579  | 3 | 2 | 5 | 0 |
| Case 36 | 6 | 41,533,595  | 42,025,058  | 2 | 2 | 4 | 0 |
| Case 36 | 6 | 42,025,210  | 42,993,027  | 3 | 2 | 5 | 0 |
| Case 36 | 6 | 42,993,788  | 43,488,108  | 2 | 2 | 4 | 0 |
| Case 36 | 6 | 43,488,144  | 44,200,953  | 3 | 2 | 5 | 0 |
| Case 36 | 6 | 44,201,182  | 44,273,412  | 2 | 2 | 4 | 0 |
| Case 36 | 6 | 44,273,546  | 58,752,089  | 3 | 2 | 5 | 0 |
| Case 36 | 6 | 61,891,118  | 72,385,311  | 3 | 2 | 5 | 0 |
| Case 36 | 6 | 72,406,319  | 72,727,772  | 3 | 0 | 3 | 1 |
| Case 36 | 6 | 72,729,528  | 73,495,941  | 2 | 0 | 2 | 1 |
| Case 36 | 6 | 73,506,104  | 75,319,716  | 3 | 0 | 3 | 1 |
| Case 36 | 6 | 75,320,927  | 75,559,326  | 2 | 0 | 2 | 1 |
| Case 36 | 6 | 75,560,968  | 75,740,176  | 3 | 0 | 3 | 1 |
| Case 36 | 6 | 75,745,190  | 75,840,120  | 2 | 0 | 2 | 1 |
| Case 36 | 6 | 75,840,573  | 76,265,642  | 3 | 0 | 3 | 1 |
| Case 36 | 6 | 76,271,141  | 76,450,023  | 2 | 0 | 2 | 1 |
| Case 36 | 6 | 76,458,378  | 77,577,055  | 3 | 0 | 3 | 1 |
| Case 36 | 6 | 77,587,889  | 78,134,695  | 2 | 0 | 2 | 1 |
| Case 36 | 6 | 78,136,686  | 78,524,718  | 3 | 0 | 3 | 1 |
| Case 36 | 6 | 78,526,794  | 79,378,422  | 2 | 0 | 2 | 1 |
| Case 36 | 6 | 79,379,460  | 79,595,096  | 3 | 0 | 3 | 1 |
| Case 36 | 6 | 79,595,097  | 79,856,630  | 2 | 0 | 2 | 1 |
| Case 36 | 6 | 79,859,877  | 80,582,193  | 3 | 0 | 3 | 1 |
| Case 36 | 6 | 80,590,664  | 80,765,111  | 2 | 0 | 2 | 1 |
| Case 36 | 6 | 80,775,330  | 81,026,899  | 3 | 0 | 3 | 1 |
| Case 36 | 6 | 81,030,941  | 81,070,372  | 2 | 0 | 2 | 1 |
| Case 36 | 6 | 81,072,063  | 81,708,701  | 3 | 0 | 3 | 1 |
| Case 36 | 6 | 81,710,053  | 82,149,482  | 2 | 0 | 2 | 1 |
| Case 36 | 6 | 82,159,696  | 82,856,409  | 3 | 0 | 3 | 1 |
| Case 36 | 6 | 82,857,374  | 82,950,189  | 2 | 0 | 2 | 1 |
| Case 36 | 6 | 82,958,246  | 83,728,759  | 3 | 0 | 3 | 1 |
| Case 36 | 6 | 83,733,785  | 84,117,512  | 2 | 0 | 2 | 1 |
| Case 36 | 6 | 84,119,361  | 84,264,333  | 3 | 0 | 3 | 1 |
| Case 36 | 6 | 84,265,264  | 84,695,944  | 2 | 0 | 2 | 1 |
| Case 36 | 6 | 84,698,353  | 84,871,572  | 3 | 0 | 3 | 1 |
| Case 36 | 6 | 84,879,058  | 84,930,825  | 2 | 0 | 2 | 1 |
| Case 36 | 6 | 84,935,635  | 86,203,585  | 3 | 0 | 3 | 1 |
| Case 36 | 6 | 86,203,963  | 86,284,078  | 2 | 0 | 2 | 1 |
| Case 36 | 6 | 86,289,415  | 88,140,811  | 3 | 0 | 3 | 1 |
| Case 36 | 6 | 88,140,844  | 88,345,048  | 2 | 0 | 2 | 1 |
| Case 36 | 6 | 88,346,164  | 90,541,969  | 3 | 0 | 3 | 1 |
| Case 36 | 6 | 90,544,486  | 90,576,723  | 2 | 0 | 2 | 1 |
| Case 36 | 6 | 90,577,712  | 92,155,955  | 3 | 0 | 3 | 1 |
| Case 36 | 6 | 92,164,986  | 93,488,364  | 2 | 0 | 2 | 1 |
| Case 36 | 6 | 93,491,572  | 93,566,127  | 3 | 0 | 3 | 1 |
| Case 36 | 6 | 93,571,654  | 97,120,254  | 2 | 0 | 2 | 1 |
| Case 36 | 6 | 97,120,756  | 97,613,321  | 3 | 0 | 3 | 1 |
| Case 36 | 6 | 97,616,053  | 97,720,648  | 2 | 0 | 2 | 1 |
| Case 36 | 6 | 97,722,634  | 99,270,438  | 3 | 0 | 3 | 1 |
| Case 36 | 6 | 99,270,533  | 99,365,582  | 2 | 0 | 2 | 1 |
| Case 36 | 6 | 99,374,400  | 99,804,157  | 3 | 0 | 3 | 1 |
| Case 36 | 6 | 99,806,408  | 99,936,165  | 2 | 0 | 2 | 1 |
| Case 36 | 6 | 99,939,045  | 100,964,057 | 3 | 0 | 3 | 1 |
| Case 36 | 6 | 100,964,063 | 101,275,792 | 2 | 0 | 2 | 1 |
| Case 36 | 6 | 101,295,873 | 101,989,945 | 3 | 0 | 3 | 1 |
| Case 36 | 6 | 101,990,259 | 104,587,040 | 2 | 0 | 2 | 1 |
| Case 36 | 6 | 104,592,769 | 105,173,534 | 3 | 0 | 3 | 1 |
| Case 36 | 6 | 105,180,893 | 105,352,035 | 2 | 0 | 2 | 1 |
| Case 36 | 6 | 105,378,954 | 109,274,497 | 3 | 0 | 3 | 1 |



|         |   |             |             |   |   |   |   |
|---------|---|-------------|-------------|---|---|---|---|
| Case 36 | 6 | 109,274,514 | 109,524,939 | 2 | 0 | 2 | 1 |
| Case 36 | 6 | 109,524,979 | 109,771,258 | 3 | 0 | 3 | 1 |
| Case 36 | 6 | 109,771,583 | 109,946,561 | 2 | 0 | 2 | 1 |
| Case 36 | 6 | 109,951,180 | 110,396,540 | 3 | 0 | 3 | 1 |
| Case 36 | 6 | 110,401,183 | 110,532,805 | 2 | 0 | 2 | 1 |
| Case 36 | 6 | 110,533,410 | 111,695,268 | 3 | 0 | 3 | 1 |
| Case 36 | 6 | 111,695,281 | 111,784,919 | 2 | 0 | 2 | 1 |
| Case 36 | 6 | 111,809,796 | 112,389,600 | 3 | 0 | 3 | 1 |
| Case 36 | 6 | 112,390,565 | 112,397,665 | 2 | 0 | 2 | 1 |
| Case 36 | 6 | 112,399,750 | 112,810,278 | 3 | 0 | 3 | 1 |
| Case 36 | 6 | 112,818,452 | 113,562,376 | 2 | 0 | 2 | 1 |
| Case 36 | 6 | 113,564,702 | 114,846,123 | 3 | 0 | 3 | 1 |
| Case 36 | 6 | 114,848,711 | 115,967,305 | 2 | 0 | 2 | 1 |
| Case 36 | 6 | 115,975,295 | 116,423,299 | 3 | 0 | 3 | 1 |
| Case 36 | 6 | 116,429,582 | 116,451,442 | 2 | 0 | 2 | 1 |
| Case 36 | 6 | 116,452,203 | 116,972,117 | 3 | 0 | 3 | 1 |
| Case 36 | 6 | 116,972,865 | 117,080,851 | 2 | 0 | 2 | 1 |
| Case 36 | 6 | 117,081,057 | 117,297,513 | 3 | 0 | 3 | 1 |
| Case 36 | 6 | 117,303,710 | 117,522,819 | 2 | 0 | 2 | 1 |
| Case 36 | 6 | 117,525,530 | 117,842,698 | 3 | 0 | 3 | 1 |
| Case 36 | 6 | 117,844,072 | 117,860,508 | 2 | 0 | 2 | 1 |
| Case 36 | 6 | 117,861,891 | 118,790,266 | 3 | 0 | 3 | 1 |
| Case 36 | 6 | 118,791,750 | 118,886,615 | 2 | 0 | 2 | 1 |
| Case 36 | 6 | 118,886,886 | 120,248,560 | 3 | 0 | 3 | 1 |
| Case 36 | 6 | 120,250,121 | 121,117,917 | 2 | 0 | 2 | 1 |
| Case 36 | 6 | 121,118,144 | 121,313,346 | 3 | 0 | 3 | 1 |
| Case 36 | 6 | 121,320,685 | 121,625,975 | 2 | 0 | 2 | 1 |
| Case 36 | 6 | 121,629,167 | 121,857,609 | 3 | 0 | 3 | 1 |
| Case 36 | 6 | 121,860,207 | 122,296,892 | 2 | 0 | 2 | 1 |
| Case 36 | 6 | 122,296,944 | 122,537,218 | 3 | 0 | 3 | 1 |
| Case 36 | 6 | 122,537,787 | 122,774,962 | 2 | 0 | 2 | 1 |
| Case 36 | 6 | 122,778,986 | 123,552,306 | 3 | 0 | 3 | 1 |
| Case 36 | 6 | 123,556,891 | 124,029,779 | 2 | 0 | 2 | 1 |
| Case 36 | 6 | 124,032,062 | 124,163,015 | 3 | 0 | 3 | 1 |
| Case 36 | 6 | 124,166,282 | 124,935,890 | 2 | 0 | 2 | 1 |
| Case 36 | 6 | 124,937,930 | 127,456,122 | 3 | 0 | 3 | 1 |
| Case 36 | 6 | 127,460,591 | 127,761,157 | 2 | 0 | 2 | 1 |
| Case 36 | 6 | 127,764,305 | 130,188,359 | 3 | 0 | 3 | 1 |
| Case 36 | 6 | 130,190,531 | 130,222,234 | 2 | 0 | 2 | 1 |
| Case 36 | 6 | 130,231,608 | 131,470,839 | 3 | 0 | 3 | 1 |
| Case 36 | 6 | 131,476,528 | 131,490,472 | 2 | 0 | 2 | 1 |
| Case 36 | 6 | 131,498,603 | 132,482,287 | 3 | 0 | 3 | 1 |
| Case 36 | 6 | 132,483,263 | 132,618,991 | 2 | 0 | 2 | 1 |
| Case 36 | 6 | 132,623,184 | 135,123,681 | 3 | 0 | 3 | 1 |
| Case 36 | 6 | 135,128,858 | 137,970,840 | 3 | 2 | 5 | 0 |
| Case 36 | 6 | 137,973,068 | 141,325,406 | 2 | 2 | 4 | 0 |
| Case 36 | 6 | 141,332,731 | 149,329,220 | 3 | 2 | 5 | 0 |
| Case 36 | 6 | 149,329,267 | 159,539,213 | 2 | 2 | 4 | 0 |
| Case 36 | 6 | 159,548,276 | 165,506,033 | 3 | 0 | 3 | 1 |
| Case 36 | 6 | 165,508,286 | 165,530,602 | 2 | 0 | 2 | 1 |
| Case 36 | 6 | 165,533,455 | 165,802,561 | 3 | 0 | 3 | 1 |
| Case 36 | 6 | 165,808,429 | 165,930,153 | 2 | 0 | 2 | 1 |
| Case 36 | 6 | 165,932,290 | 167,383,075 | 3 | 0 | 3 | 1 |
| Case 36 | 6 | 167,397,614 | 167,435,325 | 2 | 0 | 2 | 1 |
| Case 36 | 6 | 167,435,928 | 168,439,394 | 3 | 0 | 3 | 1 |
| Case 36 | 6 | 168,440,640 | 168,465,667 | 2 | 0 | 2 | 1 |
| Case 36 | 6 | 168,465,693 | 170,099,398 | 3 | 0 | 3 | 1 |
| Case 36 | 6 | 170,101,841 | 170,151,758 | 2 | 0 | 2 | 1 |
| Case 36 | 6 | 170,152,991 | 170,980,171 | 3 | 0 | 3 | 1 |
| Case 36 | 7 | 44,935      | 68,920      | 3 | 2 | 5 | 0 |
| Case 36 | 7 | 83,185      | 3,071,195   | 3 | 0 | 3 | 1 |

|         |   |             |             |   |   |   |   |
|---------|---|-------------|-------------|---|---|---|---|
| Case 36 | 7 | 3,072,215   | 3,223,846   | 4 | 0 | 4 | 1 |
| Case 36 | 7 | 3,224,002   | 4,560,681   | 3 | 0 | 3 | 1 |
| Case 36 | 7 | 4,563,881   | 5,545,427   | 2 | 0 | 2 | 1 |
| Case 36 | 7 | 5,562,740   | 10,000,210  | 4 | 1 | 5 | 0 |
| Case 36 | 7 | 10,001,320  | 10,044,734  | 3 | 2 | 5 | 0 |
| Case 36 | 7 | 10,054,784  | 10,093,480  | 2 | 0 | 2 | 1 |
| Case 36 | 7 | 10,096,250  | 16,846,624  | 4 | 1 | 5 | 0 |
| Case 36 | 7 | 16,847,745  | 21,446,473  | 4 | 2 | 6 | 0 |
| Case 36 | 7 | 21,449,367  | 21,449,367  | 2 | 2 | 4 | 0 |
| Case 36 | 7 | 21,449,418  | 21,880,186  | 3 | 2 | 5 | 0 |
| Case 36 | 7 | 21,881,548  | 22,191,936  | 4 | 2 | 6 | 0 |
| Case 36 | 7 | 22,194,105  | 38,292,663  | 2 | 2 | 4 | 0 |
| Case 36 | 7 | 38,297,145  | 38,412,022  | 3 | 2 | 5 | 0 |
| Case 36 | 7 | 38,412,988  | 58,019,061  | 2 | 2 | 4 | 0 |
| Case 36 | 7 | 61,056,053  | 87,229,931  | 2 | 2 | 4 | 0 |
| Case 36 | 7 | 87,230,107  | 87,239,351  | 4 | 2 | 6 | 0 |
| Case 36 | 7 | 87,244,960  | 94,997,953  | 2 | 2 | 4 | 0 |
| Case 36 | 7 | 94,999,110  | 95,082,010  | 4 | 2 | 6 | 0 |
| Case 36 | 7 | 95,084,622  | 117,828,710 | 2 | 2 | 4 | 0 |
| Case 36 | 7 | 117,832,138 | 117,879,968 | 3 | 2 | 5 | 0 |
| Case 36 | 7 | 117,903,588 | 128,088,973 | 2 | 2 | 4 | 0 |
| Case 36 | 7 | 128,097,359 | 128,880,489 | 3 | 0 | 3 | 1 |
| Case 36 | 7 | 128,932,749 | 135,661,332 | 2 | 2 | 4 | 0 |
| Case 36 | 7 | 135,675,538 | 136,421,981 | 4 | 2 | 6 | 0 |
| Case 36 | 7 | 136,426,247 | 143,217,190 | 2 | 2 | 4 | 0 |
| Case 36 | 7 | 143,425,378 | 145,171,914 | 3 | 0 | 3 | 1 |
| Case 36 | 7 | 145,175,716 | 145,333,229 | 2 | 0 | 2 | 1 |
| Case 36 | 7 | 145,334,673 | 145,346,374 | 3 | 0 | 3 | 1 |
| Case 36 | 7 | 145,353,563 | 159,119,486 | 4 | 0 | 4 | 1 |
| Case 36 | 8 | 164,984     | 195,254     | 3 | 0 | 3 | 1 |
| Case 36 | 8 | 195,338     | 200,898     | 2 | 0 | 2 | 1 |
| Case 36 | 8 | 202,842     | 408,396     | 3 | 0 | 3 | 1 |
| Case 36 | 8 | 408,419     | 443,959     | 2 | 0 | 2 | 1 |
| Case 36 | 8 | 444,485     | 2,781,277   | 3 | 0 | 3 | 1 |
| Case 36 | 8 | 2,783,183   | 2,827,657   | 2 | 0 | 2 | 1 |
| Case 36 | 8 | 2,830,672   | 3,200,119   | 3 | 0 | 3 | 1 |
| Case 36 | 8 | 3,200,869   | 3,224,276   | 2 | 0 | 2 | 1 |
| Case 36 | 8 | 3,224,430   | 3,585,967   | 3 | 0 | 3 | 1 |
| Case 36 | 8 | 3,586,010   | 3,620,935   | 2 | 0 | 2 | 1 |
| Case 36 | 8 | 3,621,844   | 3,775,951   | 3 | 0 | 3 | 1 |
| Case 36 | 8 | 3,778,054   | 3,801,902   | 2 | 0 | 2 | 1 |
| Case 36 | 8 | 3,803,623   | 3,965,925   | 3 | 0 | 3 | 1 |
| Case 36 | 8 | 3,967,931   | 4,000,329   | 2 | 0 | 2 | 1 |
| Case 36 | 8 | 4,002,031   | 4,027,930   | 3 | 0 | 3 | 1 |
| Case 36 | 8 | 4,028,497   | 4,075,796   | 2 | 0 | 2 | 1 |
| Case 36 | 8 | 4,076,758   | 4,391,037   | 3 | 0 | 3 | 1 |
| Case 36 | 8 | 4,391,377   | 4,476,957   | 2 | 0 | 2 | 1 |
| Case 36 | 8 | 4,480,667   | 4,707,735   | 3 | 0 | 3 | 1 |
| Case 36 | 8 | 4,710,970   | 4,824,577   | 2 | 0 | 2 | 1 |
| Case 36 | 8 | 4,826,467   | 5,138,892   | 3 | 0 | 3 | 1 |
| Case 36 | 8 | 5,140,102   | 5,187,640   | 2 | 0 | 2 | 1 |
| Case 36 | 8 | 5,189,722   | 5,425,625   | 3 | 0 | 3 | 1 |
| Case 36 | 8 | 5,427,730   | 5,454,376   | 2 | 0 | 2 | 1 |
| Case 36 | 8 | 5,456,234   | 5,528,849   | 3 | 0 | 3 | 1 |
| Case 36 | 8 | 5,529,622   | 5,549,438   | 2 | 0 | 2 | 1 |
| Case 36 | 8 | 5,549,469   | 5,652,595   | 3 | 0 | 3 | 1 |
| Case 36 | 8 | 5,654,482   | 5,793,832   | 2 | 0 | 2 | 1 |
| Case 36 | 8 | 5,794,525   | 6,293,568   | 3 | 0 | 3 | 1 |
| Case 36 | 8 | 6,296,482   | 6,303,409   | 2 | 0 | 2 | 1 |
| Case 36 | 8 | 6,307,492   | 9,438,928   | 3 | 0 | 3 | 1 |
| Case 36 | 8 | 9,442,027   | 9,623,278   | 2 | 0 | 2 | 1 |

|         |   |             |             |   |   |   |   |
|---------|---|-------------|-------------|---|---|---|---|
| Case 36 | 8 | 9,634,229   | 12,554,743  | 3 | 0 | 3 | 1 |
| Case 36 | 8 | 12,559,475  | 12,603,472  | 2 | 0 | 2 | 1 |
| Case 36 | 8 | 12,606,760  | 12,876,558  | 3 | 0 | 3 | 1 |
| Case 36 | 8 | 12,878,631  | 12,879,157  | 2 | 0 | 2 | 1 |
| Case 36 | 8 | 12,879,198  | 13,610,731  | 3 | 0 | 3 | 1 |
| Case 36 | 8 | 13,613,335  | 14,451,068  | 2 | 0 | 2 | 1 |
| Case 36 | 8 | 14,451,137  | 14,508,593  | 3 | 0 | 3 | 1 |
| Case 36 | 8 | 14,508,908  | 14,844,324  | 2 | 0 | 2 | 1 |
| Case 36 | 8 | 14,848,938  | 14,956,717  | 3 | 0 | 3 | 1 |
| Case 36 | 8 | 14,962,494  | 15,237,056  | 2 | 0 | 2 | 1 |
| Case 36 | 8 | 15,238,678  | 15,313,497  | 3 | 0 | 3 | 1 |
| Case 36 | 8 | 15,314,352  | 15,482,653  | 2 | 0 | 2 | 1 |
| Case 36 | 8 | 15,488,238  | 15,511,767  | 3 | 0 | 3 | 1 |
| Case 36 | 8 | 15,523,366  | 15,738,015  | 2 | 0 | 2 | 1 |
| Case 36 | 8 | 15,742,366  | 15,791,633  | 3 | 0 | 3 | 1 |
| Case 36 | 8 | 15,792,451  | 15,933,011  | 2 | 0 | 2 | 1 |
| Case 36 | 8 | 15,934,868  | 16,850,601  | 3 | 0 | 3 | 1 |
| Case 36 | 8 | 16,850,694  | 16,978,400  | 2 | 0 | 2 | 1 |
| Case 36 | 8 | 16,982,443  | 17,738,049  | 3 | 0 | 3 | 1 |
| Case 36 | 8 | 17,739,538  | 17,753,872  | 2 | 0 | 2 | 1 |
| Case 36 | 8 | 17,754,461  | 17,804,719  | 3 | 0 | 3 | 1 |
| Case 36 | 8 | 17,804,768  | 17,887,205  | 2 | 0 | 2 | 1 |
| Case 36 | 8 | 17,888,770  | 20,038,418  | 3 | 0 | 3 | 1 |
| Case 36 | 8 | 20,038,445  | 20,071,503  | 2 | 0 | 2 | 1 |
| Case 36 | 8 | 20,078,643  | 21,970,230  | 3 | 0 | 3 | 1 |
| Case 36 | 8 | 21,971,141  | 21,996,556  | 2 | 0 | 2 | 1 |
| Case 36 | 8 | 22,001,072  | 25,327,421  | 3 | 0 | 3 | 1 |
| Case 36 | 8 | 25,337,458  | 25,364,811  | 2 | 0 | 2 | 1 |
| Case 36 | 8 | 25,364,889  | 27,630,152  | 3 | 0 | 3 | 1 |
| Case 36 | 8 | 27,633,972  | 27,690,627  | 2 | 0 | 2 | 1 |
| Case 36 | 8 | 27,702,453  | 30,704,681  | 3 | 0 | 3 | 1 |
| Case 36 | 8 | 30,704,897  | 30,705,909  | 2 | 0 | 2 | 1 |
| Case 36 | 8 | 30,706,059  | 30,933,799  | 3 | 0 | 3 | 1 |
| Case 36 | 8 | 30,936,356  | 31,004,607  | 2 | 0 | 2 | 1 |
| Case 36 | 8 | 31,008,747  | 37,963,081  | 3 | 0 | 3 | 1 |
| Case 36 | 8 | 37,963,239  | 38,025,175  | 4 | 0 | 4 | 1 |
| Case 36 | 8 | 38,027,519  | 38,869,833  | 3 | 0 | 3 | 1 |
| Case 36 | 8 | 38,871,509  | 39,141,120  | 2 | 0 | 2 | 1 |
| Case 36 | 8 | 39,142,264  | 39,194,984  | 3 | 0 | 3 | 1 |
| Case 36 | 8 | 39,195,489  | 39,782,839  | 2 | 0 | 2 | 1 |
| Case 36 | 8 | 39,785,321  | 43,147,309  | 3 | 0 | 3 | 1 |
| Case 36 | 8 | 43,147,398  | 43,791,691  | 2 | 0 | 2 | 1 |
| Case 36 | 8 | 46,886,735  | 47,472,201  | 2 | 0 | 2 | 1 |
| Case 36 | 8 | 47,491,073  | 49,987,801  | 3 | 0 | 3 | 1 |
| Case 36 | 8 | 49,988,587  | 52,157,579  | 2 | 0 | 2 | 1 |
| Case 36 | 8 | 52,157,888  | 53,434,613  | 3 | 0 | 3 | 1 |
| Case 36 | 8 | 53,436,131  | 53,809,456  | 2 | 0 | 2 | 1 |
| Case 36 | 8 | 53,810,264  | 59,873,636  | 3 | 0 | 3 | 1 |
| Case 36 | 8 | 59,882,421  | 60,018,743  | 2 | 0 | 2 | 1 |
| Case 36 | 8 | 60,021,908  | 60,470,686  | 3 | 0 | 3 | 1 |
| Case 36 | 8 | 60,476,673  | 60,753,118  | 2 | 0 | 2 | 1 |
| Case 36 | 8 | 60,756,918  | 62,795,087  | 3 | 0 | 3 | 1 |
| Case 36 | 8 | 62,803,036  | 63,033,016  | 2 | 0 | 2 | 1 |
| Case 36 | 8 | 63,039,751  | 63,614,581  | 3 | 0 | 3 | 1 |
| Case 36 | 8 | 63,635,874  | 63,676,101  | 2 | 0 | 2 | 1 |
| Case 36 | 8 | 63,691,194  | 64,505,710  | 3 | 0 | 3 | 1 |
| Case 36 | 8 | 64,508,587  | 65,008,255  | 2 | 0 | 2 | 1 |
| Case 36 | 8 | 65,014,043  | 125,792,809 | 2 | 2 | 4 | 0 |
| Case 36 | 8 | 125,797,266 | 128,713,873 | 4 | 2 | 6 | 0 |
| Case 36 | 8 | 128,718,068 | 129,046,208 | 3 | 2 | 5 | 0 |
| Case 36 | 8 | 129,047,325 | 132,996,359 | 4 | 2 | 6 | 0 |

|         |   |             |             |   |   |   |   |
|---------|---|-------------|-------------|---|---|---|---|
| Case 36 | 8 | 132,996,525 | 134,492,551 | 3 | 2 | 5 | 0 |
| Case 36 | 8 | 134,494,524 | 138,964,007 | 4 | 2 | 6 | 0 |
| Case 36 | 8 | 138,967,803 | 140,516,541 | 3 | 2 | 5 | 0 |
| Case 36 | 8 | 140,519,341 | 140,843,167 | 4 | 2 | 6 | 0 |
| Case 36 | 8 | 140,847,892 | 140,847,892 | 2 | 2 | 4 | 0 |
| Case 36 | 8 | 140,848,850 | 144,620,861 | 3 | 2 | 5 | 0 |
| Case 36 | 8 | 144,620,891 | 144,620,891 | 2 | 0 | 2 | 1 |
| Case 36 | 8 | 144,620,900 | 146,293,414 | 4 | 1 | 5 | 0 |
| Case 36 | 9 | 46,587      | 3,370,160   | 4 | 0 | 4 | 1 |
| Case 36 | 9 | 3,378,048   | 4,860,943   | 3 | 0 | 3 | 1 |
| Case 36 | 9 | 4,861,479   | 4,921,824   | 4 | 0 | 4 | 1 |
| Case 36 | 9 | 4,926,113   | 5,022,807   | 3 | 0 | 3 | 1 |
| Case 36 | 9 | 5,029,893   | 20,670,187  | 4 | 0 | 4 | 1 |
| Case 36 | 9 | 20,670,573  | 20,670,573  | 3 | 0 | 3 | 1 |
| Case 36 | 9 | 20,676,454  | 20,676,454  | 1 | 1 | 2 | 0 |
| Case 36 | 9 | 20,690,387  | 21,129,719  | 0 | 0 | 0 | 0 |
| Case 36 | 9 | 21,132,664  | 21,139,896  | 1 | 1 | 2 | 0 |
| Case 36 | 9 | 21,141,080  | 21,163,761  | 0 | 0 | 0 | 0 |
| Case 36 | 9 | 21,166,004  | 21,166,270  | 1 | 1 | 2 | 0 |
| Case 36 | 9 | 21,170,595  | 21,198,384  | 0 | 0 | 0 | 0 |
| Case 36 | 9 | 21,199,680  | 21,239,706  | 1 | 1 | 2 | 0 |
| Case 36 | 9 | 21,239,720  | 21,555,445  | 0 | 0 | 0 | 0 |
| Case 36 | 9 | 21,565,674  | 21,606,786  | 1 | 1 | 2 | 0 |
| Case 36 | 9 | 21,611,256  | 21,826,387  | 0 | 0 | 0 | 0 |
| Case 36 | 9 | 21,830,479  | 21,853,221  | 1 | 1 | 2 | 0 |
| Case 36 | 9 | 21,854,199  | 21,855,038  | 0 | 0 | 0 | 0 |
| Case 36 | 9 | 21,856,777  | 21,902,354  | 1 | 1 | 2 | 0 |
| Case 36 | 9 | 21,909,979  | 22,145,694  | 0 | 0 | 0 | 0 |
| Case 36 | 9 | 22,151,465  | 22,155,709  | 1 | 1 | 2 | 0 |
| Case 36 | 9 | 22,157,908  | 22,451,501  | 0 | 0 | 0 | 0 |
| Case 36 | 9 | 22,451,581  | 22,451,906  | 1 | 1 | 2 | 0 |
| Case 36 | 9 | 22,454,125  | 24,511,918  | 0 | 0 | 0 | 0 |
| Case 36 | 9 | 24,515,111  | 24,515,111  | 1 | 1 | 2 | 0 |
| Case 36 | 9 | 24,522,869  | 24,522,869  | 3 | 0 | 3 | 1 |
| Case 36 | 9 | 24,527,357  | 33,629,249  | 4 | 0 | 4 | 1 |
| Case 36 | 9 | 33,633,838  | 34,241,681  | 3 | 0 | 3 | 1 |
| Case 36 | 9 | 34,242,106  | 35,310,492  | 4 | 0 | 4 | 1 |
| Case 36 | 9 | 35,343,563  | 36,314,530  | 3 | 2 | 5 | 0 |
| Case 36 | 9 | 36,315,900  | 37,395,039  | 4 | 2 | 6 | 0 |
| Case 36 | 9 | 37,395,138  | 38,235,659  | 3 | 2 | 5 | 0 |
| Case 36 | 9 | 38,244,221  | 39,098,698  | 4 | 2 | 6 | 0 |
| Case 36 | 9 | 39,103,743  | 40,800,551  | 2 | 2 | 4 | 0 |
| Case 36 | 9 | 41,290,880  | 46,944,322  | 3 | 2 | 5 | 0 |
| Case 36 | 9 | 65,629,772  | 69,238,239  | 3 | 2 | 5 | 0 |
| Case 36 | 9 | 69,355,037  | 72,792,945  | 3 | 0 | 3 | 1 |
| Case 36 | 9 | 72,833,310  | 72,979,121  | 2 | 0 | 2 | 1 |
| Case 36 | 9 | 72,979,246  | 73,820,503  | 3 | 0 | 3 | 1 |
| Case 36 | 9 | 73,828,288  | 73,929,083  | 2 | 0 | 2 | 1 |
| Case 36 | 9 | 73,931,778  | 75,231,370  | 3 | 0 | 3 | 1 |
| Case 36 | 9 | 75,232,433  | 75,537,298  | 2 | 0 | 2 | 1 |
| Case 36 | 9 | 75,537,406  | 75,784,045  | 3 | 0 | 3 | 1 |
| Case 36 | 9 | 75,784,264  | 76,433,950  | 2 | 0 | 2 | 1 |
| Case 36 | 9 | 76,444,334  | 76,744,909  | 3 | 0 | 3 | 1 |
| Case 36 | 9 | 76,753,271  | 76,969,241  | 2 | 0 | 2 | 1 |
| Case 36 | 9 | 76,970,791  | 77,755,469  | 3 | 0 | 3 | 1 |
| Case 36 | 9 | 77,758,636  | 77,808,519  | 2 | 0 | 2 | 1 |
| Case 36 | 9 | 77,809,042  | 79,791,793  | 3 | 0 | 3 | 1 |
| Case 36 | 9 | 79,802,986  | 80,020,875  | 2 | 0 | 2 | 1 |
| Case 36 | 9 | 80,030,829  | 82,705,241  | 3 | 0 | 3 | 1 |
| Case 36 | 9 | 82,706,489  | 83,044,102  | 2 | 0 | 2 | 1 |
| Case 36 | 9 | 83,046,008  | 83,174,096  | 3 | 0 | 3 | 1 |

|         |    |             |             |   |   |   |   |
|---------|----|-------------|-------------|---|---|---|---|
| Case 36 | 9  | 83,174,331  | 83,441,767  | 2 | 0 | 2 | 1 |
| Case 36 | 9  | 83,445,616  | 88,164,213  | 3 | 0 | 3 | 1 |
| Case 36 | 9  | 88,167,035  | 88,242,953  | 2 | 0 | 2 | 1 |
| Case 36 | 9  | 88,244,337  | 95,077,604  | 3 | 0 | 3 | 1 |
| Case 36 | 9  | 95,077,688  | 95,258,739  | 2 | 0 | 2 | 1 |
| Case 36 | 9  | 95,263,009  | 95,560,534  | 3 | 0 | 3 | 1 |
| Case 36 | 9  | 95,561,537  | 95,610,753  | 2 | 0 | 2 | 1 |
| Case 36 | 9  | 95,616,149  | 98,607,989  | 3 | 0 | 3 | 1 |
| Case 36 | 9  | 98,623,567  | 98,733,782  | 2 | 0 | 2 | 1 |
| Case 36 | 9  | 98,739,498  | 99,509,624  | 3 | 0 | 3 | 1 |
| Case 36 | 9  | 99,509,885  | 99,797,908  | 2 | 0 | 2 | 1 |
| Case 36 | 9  | 99,798,293  | 105,093,304 | 3 | 0 | 3 | 1 |
| Case 36 | 9  | 105,094,335 | 105,587,136 | 2 | 0 | 2 | 1 |
| Case 36 | 9  | 105,591,790 | 105,734,158 | 3 | 0 | 3 | 1 |
| Case 36 | 9  | 105,735,195 | 105,767,437 | 2 | 0 | 2 | 1 |
| Case 36 | 9  | 105,767,464 | 105,812,289 | 3 | 0 | 3 | 1 |
| Case 36 | 9  | 105,815,502 | 106,148,215 | 2 | 0 | 2 | 1 |
| Case 36 | 9  | 106,153,263 | 106,306,486 | 3 | 0 | 3 | 1 |
| Case 36 | 9  | 106,311,685 | 106,417,844 | 2 | 0 | 2 | 1 |
| Case 36 | 9  | 106,422,027 | 106,857,824 | 3 | 0 | 3 | 1 |
| Case 36 | 9  | 106,857,829 | 107,045,058 | 2 | 0 | 2 | 1 |
| Case 36 | 9  | 107,047,590 | 107,457,686 | 3 | 0 | 3 | 1 |
| Case 36 | 9  | 107,457,725 | 107,555,077 | 2 | 0 | 2 | 1 |
| Case 36 | 9  | 107,555,306 | 107,974,737 | 3 | 0 | 3 | 1 |
| Case 36 | 9  | 107,975,234 | 108,240,797 | 2 | 0 | 2 | 1 |
| Case 36 | 9  | 108,243,493 | 113,648,839 | 3 | 0 | 3 | 1 |
| Case 36 | 9  | 113,649,462 | 113,703,439 | 2 | 0 | 2 | 1 |
| Case 36 | 9  | 113,704,268 | 114,462,322 | 3 | 0 | 3 | 1 |
| Case 36 | 9  | 114,464,401 | 114,562,289 | 2 | 0 | 2 | 1 |
| Case 36 | 9  | 114,563,069 | 119,699,452 | 3 | 0 | 3 | 1 |
| Case 36 | 9  | 119,702,496 | 119,722,707 | 2 | 0 | 2 | 1 |
| Case 36 | 9  | 119,724,111 | 123,914,874 | 3 | 0 | 3 | 1 |
| Case 36 | 9  | 123,917,010 | 123,929,783 | 2 | 0 | 2 | 1 |
| Case 36 | 9  | 123,929,893 | 131,457,125 | 3 | 0 | 3 | 1 |
| Case 36 | 9  | 131,464,046 | 131,475,583 | 2 | 0 | 2 | 1 |
| Case 36 | 9  | 131,475,625 | 132,374,678 | 3 | 0 | 3 | 1 |
| Case 36 | 9  | 132,374,704 | 132,377,900 | 2 | 0 | 2 | 1 |
| Case 36 | 9  | 132,380,301 | 136,131,415 | 3 | 0 | 3 | 1 |
| Case 36 | 9  | 136,131,429 | 136,131,740 | 2 | 0 | 2 | 1 |
| Case 36 | 9  | 136,131,905 | 139,232,005 | 3 | 0 | 3 | 1 |
| Case 36 | 9  | 139,233,113 | 139,277,886 | 2 | 0 | 2 | 1 |
| Case 36 | 9  | 139,278,407 | 139,749,102 | 3 | 0 | 3 | 1 |
| Case 36 | 9  | 139,749,229 | 139,754,431 | 2 | 0 | 2 | 1 |
| Case 36 | 9  | 139,756,883 | 140,007,817 | 3 | 0 | 3 | 1 |
| Case 36 | 9  | 140,007,869 | 140,094,273 | 2 | 0 | 2 | 1 |
| Case 36 | 9  | 140,099,541 | 140,165,510 | 3 | 0 | 3 | 1 |
| Case 36 | 9  | 140,166,981 | 140,329,141 | 2 | 0 | 2 | 1 |
| Case 36 | 9  | 140,329,373 | 141,066,491 | 3 | 0 | 3 | 1 |
| Case 36 | 10 | 98,087      | 2,064,234   | 3 | 0 | 3 | 1 |
| Case 36 | 10 | 2,065,094   | 2,088,596   | 2 | 0 | 2 | 1 |
| Case 36 | 10 | 2,090,551   | 4,632,979   | 3 | 0 | 3 | 1 |
| Case 36 | 10 | 4,635,292   | 4,672,037   | 2 | 0 | 2 | 1 |
| Case 36 | 10 | 4,672,693   | 8,680,784   | 3 | 0 | 3 | 1 |
| Case 36 | 10 | 8,682,679   | 8,707,550   | 2 | 0 | 2 | 1 |
| Case 36 | 10 | 8,709,338   | 8,974,568   | 3 | 0 | 3 | 1 |
| Case 36 | 10 | 8,975,723   | 9,146,556   | 2 | 0 | 2 | 1 |
| Case 36 | 10 | 9,150,482   | 10,098,119  | 3 | 0 | 3 | 1 |
| Case 36 | 10 | 10,098,760  | 10,117,897  | 2 | 0 | 2 | 1 |
| Case 36 | 10 | 10,134,319  | 11,505,743  | 3 | 0 | 3 | 1 |
| Case 36 | 10 | 11,512,648  | 11,680,543  | 2 | 0 | 2 | 1 |
| Case 36 | 10 | 11,681,939  | 13,359,607  | 3 | 0 | 3 | 1 |

|         |    |             |             |   |   |   |   |
|---------|----|-------------|-------------|---|---|---|---|
| Case 36 | 10 | 13,363,717  | 16,204,155  | 2 | 2 | 4 | 0 |
| Case 36 | 10 | 16,220,828  | 16,302,262  | 2 | 1 | 3 | 0 |
| Case 36 | 10 | 16,302,893  | 19,467,440  | 2 | 2 | 4 | 0 |
| Case 36 | 10 | 19,471,662  | 19,846,368  | 2 | 1 | 3 | 0 |
| Case 36 | 10 | 19,854,621  | 37,414,929  | 2 | 2 | 4 | 0 |
| Case 36 | 10 | 37,416,376  | 37,582,939  | 2 | 1 | 3 | 0 |
| Case 36 | 10 | 37,602,764  | 39,030,136  | 2 | 2 | 4 | 0 |
| Case 36 | 10 | 39,058,671  | 39,097,912  | 2 | 1 | 3 | 0 |
| Case 36 | 10 | 42,436,301  | 42,905,510  | 2 | 1 | 3 | 0 |
| Case 36 | 10 | 42,907,201  | 56,015,656  | 2 | 2 | 4 | 0 |
| Case 36 | 10 | 56,018,508  | 58,118,390  | 2 | 1 | 3 | 0 |
| Case 36 | 10 | 58,118,420  | 58,842,551  | 2 | 2 | 4 | 0 |
| Case 36 | 10 | 58,846,575  | 58,849,853  | 2 | 0 | 2 | 1 |
| Case 36 | 10 | 58,853,258  | 66,227,925  | 2 | 2 | 4 | 0 |
| Case 36 | 10 | 66,255,386  | 66,921,411  | 2 | 1 | 3 | 0 |
| Case 36 | 10 | 66,922,407  | 67,785,261  | 2 | 2 | 4 | 0 |
| Case 36 | 10 | 67,786,048  | 68,179,970  | 2 | 1 | 3 | 0 |
| Case 36 | 10 | 68,180,999  | 82,672,817  | 2 | 2 | 4 | 0 |
| Case 36 | 10 | 82,673,699  | 82,715,797  | 2 | 1 | 3 | 0 |
| Case 36 | 10 | 82,718,209  | 84,678,512  | 2 | 2 | 4 | 0 |
| Case 36 | 10 | 84,680,499  | 85,050,535  | 2 | 1 | 3 | 0 |
| Case 36 | 10 | 85,060,080  | 91,465,118  | 2 | 2 | 4 | 0 |
| Case 36 | 10 | 91,465,167  | 91,528,087  | 2 | 1 | 3 | 0 |
| Case 36 | 10 | 91,528,504  | 108,803,311 | 2 | 2 | 4 | 0 |
| Case 36 | 10 | 108,804,840 | 109,028,744 | 2 | 1 | 3 | 0 |
| Case 36 | 10 | 109,030,214 | 115,080,485 | 2 | 2 | 4 | 0 |
| Case 36 | 10 | 115,096,759 | 116,887,805 | 3 | 0 | 3 | 1 |
| Case 36 | 10 | 116,889,228 | 117,710,295 | 2 | 0 | 2 | 1 |
| Case 36 | 10 | 117,713,221 | 118,059,344 | 3 | 0 | 3 | 1 |
| Case 36 | 10 | 118,075,798 | 118,236,278 | 2 | 0 | 2 | 1 |
| Case 36 | 10 | 118,236,315 | 119,743,724 | 3 | 0 | 3 | 1 |
| Case 36 | 10 | 119,749,103 | 119,849,144 | 2 | 0 | 2 | 1 |
| Case 36 | 10 | 119,853,228 | 120,063,661 | 3 | 0 | 3 | 1 |
| Case 36 | 10 | 120,067,145 | 120,122,033 | 2 | 0 | 2 | 1 |
| Case 36 | 10 | 120,140,042 | 123,913,330 | 3 | 0 | 3 | 1 |
| Case 36 | 10 | 123,913,826 | 135,477,883 | 4 | 0 | 4 | 1 |
| Case 36 | 11 | 193,146     | 11,195,213  | 2 | 2 | 4 | 0 |
| Case 36 | 11 | 11,198,251  | 11,209,609  | 4 | 2 | 6 | 0 |
| Case 36 | 11 | 11,211,567  | 51,591,253  | 2 | 2 | 4 | 0 |
| Case 36 | 11 | 54,794,237  | 104,456,747 | 2 | 2 | 4 | 0 |
| Case 36 | 11 | 104,478,511 | 106,369,769 | 3 | 0 | 3 | 1 |
| Case 36 | 11 | 106,370,276 | 106,518,705 | 2 | 0 | 2 | 1 |
| Case 36 | 11 | 106,523,153 | 107,914,869 | 3 | 0 | 3 | 1 |
| Case 36 | 11 | 107,917,087 | 108,028,670 | 2 | 0 | 2 | 1 |
| Case 36 | 11 | 108,031,295 | 108,043,195 | 3 | 0 | 3 | 1 |
| Case 36 | 11 | 108,043,293 | 108,219,339 | 2 | 0 | 2 | 1 |
| Case 36 | 11 | 108,225,661 | 127,317,894 | 3 | 0 | 3 | 1 |
| Case 36 | 11 | 127,324,160 | 128,088,935 | 2 | 2 | 4 | 0 |
| Case 36 | 11 | 128,089,337 | 128,099,099 | 2 | 0 | 2 | 1 |
| Case 36 | 11 | 128,115,740 | 129,161,105 | 2 | 2 | 4 | 0 |
| Case 36 | 11 | 129,161,401 | 129,202,392 | 4 | 2 | 6 | 0 |
| Case 36 | 11 | 129,208,260 | 134,934,063 | 2 | 2 | 4 | 0 |
| Case 36 | 12 | 191,619     | 6,045,261   | 2 | 2 | 4 | 0 |
| Case 36 | 12 | 6,056,450   | 6,063,142   | 4 | 2 | 6 | 0 |
| Case 36 | 12 | 6,066,357   | 6,709,138   | 2 | 2 | 4 | 0 |
| Case 36 | 12 | 6,709,561   | 7,246,707   | 3 | 2 | 5 | 0 |
| Case 36 | 12 | 7,248,556   | 20,542,034  | 2 | 2 | 4 | 0 |
| Case 36 | 12 | 20,548,751  | 20,565,960  | 3 | 2 | 5 | 0 |
| Case 36 | 12 | 20,566,815  | 34,853,011  | 2 | 2 | 4 | 0 |
| Case 36 | 12 | 37,876,400  | 59,295,453  | 2 | 2 | 4 | 0 |
| Case 36 | 12 | 59,298,859  | 59,324,008  | 3 | 0 | 3 | 1 |

|         |    |             |             |   |   |   |   |
|---------|----|-------------|-------------|---|---|---|---|
| Case 36 | 12 | 59,348,088  | 72,508,779  | 2 | 2 | 4 | 0 |
| Case 36 | 12 | 72,538,429  | 73,187,300  | 3 | 0 | 3 | 1 |
| Case 36 | 12 | 73,197,288  | 73,674,558  | 2 | 0 | 2 | 1 |
| Case 36 | 12 | 73,685,326  | 73,890,862  | 3 | 0 | 3 | 1 |
| Case 36 | 12 | 73,898,367  | 75,202,659  | 2 | 0 | 2 | 1 |
| Case 36 | 12 | 75,205,104  | 75,669,525  | 3 | 0 | 3 | 1 |
| Case 36 | 12 | 75,671,271  | 75,844,304  | 2 | 0 | 2 | 1 |
| Case 36 | 12 | 75,849,475  | 76,683,856  | 3 | 0 | 3 | 1 |
| Case 36 | 12 | 76,685,158  | 76,927,147  | 2 | 0 | 2 | 1 |
| Case 36 | 12 | 76,933,374  | 77,189,965  | 3 | 0 | 3 | 1 |
| Case 36 | 12 | 77,191,258  | 77,256,962  | 2 | 0 | 2 | 1 |
| Case 36 | 12 | 77,259,943  | 77,471,401  | 3 | 0 | 3 | 1 |
| Case 36 | 12 | 77,472,927  | 77,528,128  | 2 | 0 | 2 | 1 |
| Case 36 | 12 | 77,528,904  | 78,804,859  | 3 | 0 | 3 | 1 |
| Case 36 | 12 | 78,816,199  | 79,621,106  | 2 | 0 | 2 | 1 |
| Case 36 | 12 | 79,625,762  | 80,628,573  | 3 | 0 | 3 | 1 |
| Case 36 | 12 | 80,632,556  | 81,088,023  | 2 | 0 | 2 | 1 |
| Case 36 | 12 | 81,091,064  | 81,388,261  | 3 | 0 | 3 | 1 |
| Case 36 | 12 | 81,390,024  | 81,692,273  | 2 | 0 | 2 | 1 |
| Case 36 | 12 | 81,695,322  | 81,893,534  | 3 | 0 | 3 | 1 |
| Case 36 | 12 | 81,901,318  | 82,099,974  | 2 | 0 | 2 | 1 |
| Case 36 | 12 | 82,102,854  | 82,752,457  | 3 | 0 | 3 | 1 |
| Case 36 | 12 | 82,752,467  | 82,918,667  | 2 | 0 | 2 | 1 |
| Case 36 | 12 | 82,921,922  | 83,588,033  | 3 | 0 | 3 | 1 |
| Case 36 | 12 | 83,591,305  | 83,849,475  | 2 | 0 | 2 | 1 |
| Case 36 | 12 | 83,854,627  | 83,941,693  | 3 | 0 | 3 | 1 |
| Case 36 | 12 | 83,950,668  | 85,082,506  | 2 | 0 | 2 | 1 |
| Case 36 | 12 | 85,090,747  | 85,203,403  | 3 | 0 | 3 | 1 |
| Case 36 | 12 | 85,212,015  | 85,564,834  | 2 | 0 | 2 | 1 |
| Case 36 | 12 | 85,576,492  | 85,833,160  | 3 | 0 | 3 | 1 |
| Case 36 | 12 | 85,864,005  | 88,900,894  | 2 | 0 | 2 | 1 |
| Case 36 | 12 | 88,902,041  | 89,625,237  | 3 | 0 | 3 | 1 |
| Case 36 | 12 | 89,639,948  | 89,893,877  | 4 | 0 | 4 | 1 |
| Case 36 | 12 | 89,905,537  | 90,926,406  | 3 | 0 | 3 | 1 |
| Case 36 | 12 | 90,941,716  | 91,057,266  | 2 | 0 | 2 | 1 |
| Case 36 | 12 | 91,064,171  | 91,357,349  | 3 | 0 | 3 | 1 |
| Case 36 | 12 | 91,357,938  | 91,441,121  | 2 | 0 | 2 | 1 |
| Case 36 | 12 | 91,441,554  | 92,073,254  | 3 | 0 | 3 | 1 |
| Case 36 | 12 | 92,077,453  | 92,248,851  | 2 | 0 | 2 | 1 |
| Case 36 | 12 | 92,259,770  | 93,151,045  | 3 | 0 | 3 | 1 |
| Case 36 | 12 | 93,155,535  | 93,347,406  | 2 | 0 | 2 | 1 |
| Case 36 | 12 | 93,351,596  | 94,761,622  | 3 | 0 | 3 | 1 |
| Case 36 | 12 | 94,761,633  | 94,890,048  | 2 | 0 | 2 | 1 |
| Case 36 | 12 | 94,891,055  | 99,855,732  | 3 | 0 | 3 | 1 |
| Case 36 | 12 | 99,863,726  | 100,482,798 | 2 | 0 | 2 | 1 |
| Case 36 | 12 | 100,482,866 | 101,525,164 | 3 | 0 | 3 | 1 |
| Case 36 | 12 | 101,525,373 | 101,577,955 | 2 | 0 | 2 | 1 |
| Case 36 | 12 | 101,581,185 | 102,513,531 | 3 | 0 | 3 | 1 |
| Case 36 | 12 | 102,517,753 | 102,711,442 | 2 | 0 | 2 | 1 |
| Case 36 | 12 | 102,714,505 | 105,482,184 | 3 | 0 | 3 | 1 |
| Case 36 | 12 | 105,484,701 | 105,562,788 | 2 | 0 | 2 | 1 |
| Case 36 | 12 | 105,564,501 | 108,942,984 | 3 | 0 | 3 | 1 |
| Case 36 | 12 | 108,949,739 | 116,756,064 | 4 | 0 | 4 | 1 |
| Case 36 | 12 | 116,757,424 | 116,801,775 | 6 | 0 | 6 | 1 |
| Case 36 | 12 | 116,804,042 | 116,840,077 | 5 | 0 | 5 | 1 |
| Case 36 | 12 | 116,844,438 | 118,261,159 | 4 | 0 | 4 | 1 |
| Case 36 | 12 | 118,261,288 | 118,473,054 | 6 | 0 | 6 | 1 |
| Case 36 | 12 | 118,473,095 | 118,664,823 | 5 | 0 | 5 | 1 |
| Case 36 | 12 | 118,673,387 | 119,840,700 | 4 | 0 | 4 | 1 |
| Case 36 | 12 | 119,840,837 | 119,853,272 | 6 | 0 | 6 | 1 |
| Case 36 | 12 | 119,853,742 | 120,527,791 | 5 | 0 | 5 | 1 |

|         |    |             |             |   |   |   |   |
|---------|----|-------------|-------------|---|---|---|---|
| Case 36 | 12 | 120,530,855 | 133,810,935 | 4 | 0 | 4 | 1 |
| Case 36 | 13 | 19,058,717  | 21,165,145  | 3 | 0 | 3 | 1 |
| Case 36 | 13 | 21,166,108  | 21,277,375  | 2 | 0 | 2 | 1 |
| Case 36 | 13 | 21,280,034  | 21,728,755  | 3 | 0 | 3 | 1 |
| Case 36 | 13 | 21,728,945  | 21,751,229  | 2 | 0 | 2 | 1 |
| Case 36 | 13 | 21,751,335  | 22,067,072  | 3 | 0 | 3 | 1 |
| Case 36 | 13 | 22,067,438  | 22,159,277  | 2 | 0 | 2 | 1 |
| Case 36 | 13 | 22,181,334  | 22,727,812  | 3 | 0 | 3 | 1 |
| Case 36 | 13 | 22,731,267  | 22,754,563  | 2 | 0 | 2 | 1 |
| Case 36 | 13 | 22,757,023  | 23,798,431  | 3 | 0 | 3 | 1 |
| Case 36 | 13 | 23,800,080  | 23,846,861  | 2 | 0 | 2 | 1 |
| Case 36 | 13 | 23,848,395  | 23,905,711  | 3 | 0 | 3 | 1 |
| Case 36 | 13 | 23,905,867  | 23,912,115  | 2 | 0 | 2 | 1 |
| Case 36 | 13 | 23,912,432  | 25,374,538  | 3 | 0 | 3 | 1 |
| Case 36 | 13 | 25,376,643  | 25,433,701  | 2 | 0 | 2 | 1 |
| Case 36 | 13 | 25,437,809  | 25,820,189  | 3 | 0 | 3 | 1 |
| Case 36 | 13 | 25,821,603  | 25,916,059  | 2 | 0 | 2 | 1 |
| Case 36 | 13 | 25,919,996  | 30,158,230  | 3 | 0 | 3 | 1 |
| Case 36 | 13 | 30,162,353  | 32,776,571  | 4 | 0 | 4 | 1 |
| Case 36 | 13 | 32,776,604  | 32,776,607  | 1 | 0 | 1 | 0 |
| Case 36 | 13 | 32,776,616  | 73,985,283  | 4 | 0 | 4 | 1 |
| Case 36 | 13 | 73,986,628  | 73,986,628  | 6 | 0 | 6 | 1 |
| Case 36 | 13 | 73,987,891  | 74,521,994  | 5 | 0 | 5 | 1 |
| Case 36 | 13 | 74,530,019  | 115,103,529 | 4 | 0 | 4 | 1 |
| Case 36 | 14 | 19,280,733  | 22,586,604  | 2 | 2 | 4 | 0 |
| Case 36 | 14 | 22,588,022  | 22,978,516  | 3 | 2 | 5 | 0 |
| Case 36 | 14 | 22,978,577  | 93,516,465  | 2 | 2 | 4 | 0 |
| Case 36 | 14 | 93,523,577  | 94,391,699  | 3 | 0 | 3 | 1 |
| Case 36 | 14 | 94,391,705  | 94,395,407  | 2 | 0 | 2 | 1 |
| Case 36 | 14 | 94,398,258  | 96,772,059  | 3 | 0 | 3 | 1 |
| Case 36 | 14 | 96,772,062  | 96,852,071  | 2 | 0 | 2 | 1 |
| Case 36 | 14 | 96,853,454  | 97,270,839  | 3 | 0 | 3 | 1 |
| Case 36 | 14 | 97,272,382  | 97,342,448  | 2 | 0 | 2 | 1 |
| Case 36 | 14 | 97,343,323  | 104,561,935 | 3 | 0 | 3 | 1 |
| Case 36 | 14 | 104,562,812 | 104,624,228 | 2 | 0 | 2 | 1 |
| Case 36 | 14 | 104,624,263 | 105,609,400 | 3 | 0 | 3 | 1 |
| Case 36 | 14 | 105,609,459 | 105,615,389 | 2 | 0 | 2 | 1 |
| Case 36 | 14 | 105,615,397 | 105,960,199 | 3 | 0 | 3 | 1 |
| Case 36 | 14 | 105,960,202 | 106,004,323 | 2 | 0 | 2 | 1 |
| Case 36 | 14 | 106,016,434 | 107,287,663 | 3 | 0 | 3 | 1 |
| Case 36 | 15 | 20,034,919  | 34,070,882  | 2 | 2 | 4 | 0 |
| Case 36 | 15 | 34,071,305  | 34,400,939  | 3 | 0 | 3 | 1 |
| Case 36 | 15 | 34,402,268  | 34,481,168  | 2 | 0 | 2 | 1 |
| Case 36 | 15 | 34,483,333  | 36,158,602  | 2 | 2 | 4 | 0 |
| Case 36 | 15 | 36,165,311  | 38,581,841  | 3 | 2 | 5 | 0 |
| Case 36 | 15 | 38,586,199  | 42,143,486  | 2 | 2 | 4 | 0 |
| Case 36 | 15 | 42,143,533  | 42,178,519  | 2 | 1 | 3 | 0 |
| Case 36 | 15 | 42,179,424  | 52,575,064  | 2 | 2 | 4 | 0 |
| Case 36 | 15 | 52,575,170  | 52,897,344  | 2 | 1 | 3 | 0 |
| Case 36 | 15 | 52,900,804  | 66,170,526  | 2 | 2 | 4 | 0 |
| Case 36 | 15 | 66,170,626  | 70,574,026  | 3 | 2 | 5 | 0 |
| Case 36 | 15 | 70,574,680  | 72,500,965  | 3 | 3 | 6 | 0 |
| Case 36 | 15 | 72,502,138  | 72,748,728  | 3 | 2 | 5 | 0 |
| Case 36 | 15 | 72,757,393  | 73,562,512  | 3 | 3 | 6 | 0 |
| Case 36 | 15 | 73,564,825  | 75,763,044  | 3 | 2 | 5 | 0 |
| Case 36 | 15 | 75,764,343  | 78,832,397  | 4 | 2 | 6 | 0 |
| Case 36 | 15 | 78,832,792  | 78,833,758  | 2 | 2 | 4 | 0 |
| Case 36 | 15 | 78,837,261  | 79,422,726  | 3 | 2 | 5 | 0 |
| Case 36 | 15 | 79,425,885  | 79,603,760  | 3 | 3 | 6 | 0 |
| Case 36 | 15 | 79,604,782  | 79,974,022  | 3 | 2 | 5 | 0 |
| Case 36 | 15 | 79,975,476  | 81,161,704  | 3 | 3 | 6 | 0 |



|         |    |             |             |   |   |   |   |
|---------|----|-------------|-------------|---|---|---|---|
| Case 36 | 15 | 81,163,924  | 81,654,624  | 3 | 2 | 5 | 0 |
| Case 36 | 15 | 81,660,237  | 82,336,141  | 3 | 3 | 6 | 0 |
| Case 36 | 15 | 82,336,154  | 83,523,424  | 3 | 2 | 5 | 0 |
| Case 36 | 15 | 83,524,257  | 85,388,376  | 3 | 3 | 6 | 0 |
| Case 36 | 15 | 85,399,645  | 85,400,643  | 3 | 2 | 5 | 0 |
| Case 36 | 15 | 85,400,716  | 88,514,162  | 4 | 2 | 6 | 0 |
| Case 36 | 15 | 88,519,216  | 90,904,028  | 3 | 2 | 5 | 0 |
| Case 36 | 15 | 90,904,216  | 91,395,711  | 4 | 2 | 6 | 0 |
| Case 36 | 15 | 91,404,788  | 91,561,079  | 3 | 2 | 5 | 0 |
| Case 36 | 15 | 91,561,182  | 93,555,717  | 4 | 2 | 6 | 0 |
| Case 36 | 15 | 93,557,954  | 93,589,740  | 3 | 2 | 5 | 0 |
| Case 36 | 15 | 93,589,788  | 95,081,853  | 3 | 3 | 6 | 0 |
| Case 36 | 15 | 95,084,911  | 99,231,868  | 4 | 3 | 7 | 0 |
| Case 36 | 15 | 99,233,945  | 99,572,400  | 3 | 3 | 6 | 0 |
| Case 36 | 15 | 99,572,794  | 99,666,329  | 4 | 3 | 7 | 0 |
| Case 36 | 15 | 99,666,979  | 99,675,028  | 3 | 3 | 6 | 0 |
| Case 36 | 15 | 99,677,357  | 100,589,092 | 4 | 3 | 7 | 0 |
| Case 36 | 15 | 100,589,191 | 100,825,794 | 3 | 3 | 6 | 0 |
| Case 36 | 15 | 100,828,865 | 101,515,268 | 4 | 3 | 7 | 0 |
| Case 36 | 15 | 101,517,957 | 101,610,336 | 3 | 3 | 6 | 0 |
| Case 36 | 15 | 101,612,059 | 101,709,549 | 4 | 3 | 7 | 0 |
| Case 36 | 15 | 101,710,165 | 101,869,255 | 3 | 3 | 6 | 0 |
| Case 36 | 15 | 101,872,187 | 101,919,500 | 4 | 3 | 7 | 0 |
| Case 36 | 15 | 101,920,286 | 102,073,917 | 3 | 3 | 6 | 0 |
| Case 36 | 15 | 102,080,355 | 102,324,456 | 4 | 3 | 7 | 0 |
| Case 36 | 15 | 102,326,466 | 102,359,203 | 3 | 3 | 6 | 0 |
| Case 36 | 15 | 102,359,268 | 102,461,162 | 4 | 3 | 7 | 0 |
| Case 36 | 16 | 88,165      | 3,061,591   | 2 | 2 | 4 | 0 |
| Case 36 | 16 | 3,061,928   | 3,073,240   | 3 | 2 | 5 | 0 |
| Case 36 | 16 | 3,073,357   | 35,285,582  | 2 | 2 | 4 | 0 |
| Case 36 | 16 | 46,450,037  | 46,450,037  | 2 | 2 | 4 | 0 |
| Case 36 | 16 | 46,532,286  | 47,829,536  | 3 | 2 | 5 | 0 |
| Case 36 | 16 | 47,859,931  | 48,130,781  | 2 | 2 | 4 | 0 |
| Case 36 | 16 | 48,130,834  | 53,203,634  | 3 | 0 | 3 | 1 |
| Case 36 | 16 | 53,213,419  | 53,326,860  | 2 | 0 | 2 | 1 |
| Case 36 | 16 | 53,331,041  | 57,789,754  | 3 | 0 | 3 | 1 |
| Case 36 | 16 | 57,790,805  | 57,798,110  | 2 | 0 | 2 | 1 |
| Case 36 | 16 | 57,801,350  | 59,427,237  | 3 | 0 | 3 | 1 |
| Case 36 | 16 | 59,452,245  | 59,540,677  | 2 | 0 | 2 | 1 |
| Case 36 | 16 | 59,542,037  | 59,839,971  | 3 | 0 | 3 | 1 |
| Case 36 | 16 | 59,854,720  | 60,056,088  | 2 | 0 | 2 | 1 |
| Case 36 | 16 | 60,057,351  | 60,458,092  | 3 | 0 | 3 | 1 |
| Case 36 | 16 | 60,458,387  | 61,642,947  | 2 | 0 | 2 | 1 |
| Case 36 | 16 | 61,646,230  | 62,056,535  | 3 | 0 | 3 | 1 |
| Case 36 | 16 | 62,074,175  | 63,580,572  | 2 | 0 | 2 | 1 |
| Case 36 | 16 | 63,582,751  | 63,781,053  | 3 | 0 | 3 | 1 |
| Case 36 | 16 | 63,783,556  | 64,221,018  | 2 | 0 | 2 | 1 |
| Case 36 | 16 | 64,226,202  | 64,406,763  | 3 | 0 | 3 | 1 |
| Case 36 | 16 | 64,411,944  | 64,498,279  | 2 | 0 | 2 | 1 |
| Case 36 | 16 | 64,508,623  | 66,962,267  | 3 | 0 | 3 | 1 |
| Case 36 | 16 | 66,962,411  | 66,997,491  | 2 | 0 | 2 | 1 |
| Case 36 | 16 | 66,997,710  | 67,220,457  | 3 | 0 | 3 | 1 |
| Case 36 | 16 | 67,220,741  | 67,222,828  | 2 | 0 | 2 | 1 |
| Case 36 | 16 | 67,222,833  | 68,104,952  | 3 | 0 | 3 | 1 |
| Case 36 | 16 | 68,104,995  | 68,150,527  | 2 | 0 | 2 | 1 |
| Case 36 | 16 | 68,154,862  | 70,843,909  | 3 | 0 | 3 | 1 |
| Case 36 | 16 | 70,867,880  | 71,070,698  | 2 | 2 | 4 | 0 |
| Case 36 | 16 | 71,070,878  | 71,218,789  | 3 | 0 | 3 | 1 |
| Case 36 | 16 | 71,220,668  | 71,332,024  | 2 | 0 | 2 | 1 |
| Case 36 | 16 | 71,343,397  | 74,662,597  | 3 | 0 | 3 | 1 |
| Case 36 | 16 | 74,664,743  | 74,683,047  | 2 | 0 | 2 | 1 |

|         |    |            |            |   |   |   |   |
|---------|----|------------|------------|---|---|---|---|
| Case 36 | 16 | 74,685,979 | 76,018,396 | 3 | 0 | 3 | 1 |
| Case 36 | 16 | 76,019,786 | 76,495,945 | 2 | 0 | 2 | 1 |
| Case 36 | 16 | 76,498,403 | 76,569,512 | 3 | 0 | 3 | 1 |
| Case 36 | 16 | 76,569,665 | 76,592,552 | 2 | 0 | 2 | 1 |
| Case 36 | 16 | 76,592,633 | 80,989,859 | 3 | 0 | 3 | 1 |
| Case 36 | 16 | 80,993,734 | 81,060,761 | 2 | 0 | 2 | 1 |
| Case 36 | 16 | 81,061,776 | 82,154,619 | 3 | 0 | 3 | 1 |
| Case 36 | 16 | 82,160,399 | 82,188,657 | 2 | 0 | 2 | 1 |
| Case 36 | 16 | 82,194,190 | 84,510,255 | 3 | 0 | 3 | 1 |
| Case 36 | 16 | 84,511,260 | 84,513,589 | 2 | 0 | 2 | 1 |
| Case 36 | 16 | 84,514,061 | 88,870,967 | 3 | 0 | 3 | 1 |
| Case 36 | 16 | 88,871,016 | 88,873,780 | 2 | 0 | 2 | 1 |
| Case 36 | 16 | 88,873,786 | 89,704,365 | 3 | 0 | 3 | 1 |
| Case 36 | 16 | 89,704,461 | 89,709,019 | 2 | 0 | 2 | 1 |
| Case 36 | 16 | 89,711,120 | 90,274,695 | 3 | 0 | 3 | 1 |
| Case 36 | 17 | 11,885     | 1,538,110  | 3 | 0 | 3 | 1 |
| Case 36 | 17 | 1,538,172  | 1,538,851  | 2 | 0 | 2 | 1 |
| Case 36 | 17 | 1,539,540  | 8,045,190  | 3 | 0 | 3 | 1 |
| Case 36 | 17 | 8,045,239  | 8,053,153  | 2 | 0 | 2 | 1 |
| Case 36 | 17 | 8,053,358  | 10,462,605 | 3 | 0 | 3 | 1 |
| Case 36 | 17 | 10,475,189 | 11,124,771 | 2 | 0 | 2 | 1 |
| Case 36 | 17 | 11,126,125 | 11,184,066 | 3 | 0 | 3 | 1 |
| Case 36 | 17 | 11,185,157 | 11,833,287 | 2 | 0 | 2 | 1 |
| Case 36 | 17 | 11,835,078 | 11,843,782 | 3 | 0 | 3 | 1 |
| Case 36 | 17 | 11,845,741 | 12,973,681 | 2 | 0 | 2 | 1 |
| Case 36 | 17 | 12,974,697 | 17,420,218 | 3 | 0 | 3 | 1 |
| Case 36 | 17 | 17,424,333 | 17,439,458 | 3 | 2 | 5 | 0 |
| Case 36 | 17 | 17,446,103 | 22,242,355 | 2 | 2 | 4 | 0 |
| Case 36 | 17 | 25,268,142 | 25,630,394 | 2 | 2 | 4 | 0 |
| Case 36 | 17 | 25,630,473 | 34,445,397 | 4 | 0 | 4 | 1 |
| Case 36 | 17 | 34,450,463 | 34,466,631 | 3 | 2 | 5 | 0 |
| Case 36 | 17 | 34,468,886 | 35,414,325 | 4 | 0 | 4 | 1 |
| Case 36 | 17 | 35,419,475 | 36,208,392 | 6 | 0 | 6 | 1 |
| Case 36 | 17 | 36,220,373 | 36,500,705 | 5 | 0 | 5 | 1 |
| Case 36 | 17 | 36,509,256 | 46,606,944 | 6 | 0 | 6 | 1 |
| Case 36 | 17 | 46,607,021 | 46,628,223 | 5 | 0 | 5 | 1 |
| Case 36 | 17 | 46,629,232 | 50,294,376 | 6 | 0 | 6 | 1 |
| Case 36 | 17 | 50,294,398 | 50,294,398 | 5 | 0 | 5 | 1 |
| Case 36 | 17 | 50,296,779 | 53,286,834 | 7 | 0 | 7 | 1 |
| Case 36 | 17 | 53,287,640 | 61,896,487 | 6 | 0 | 6 | 1 |
| Case 36 | 17 | 61,897,218 | 61,903,961 | 5 | 0 | 5 | 1 |
| Case 36 | 17 | 61,904,003 | 66,938,260 | 6 | 0 | 6 | 1 |
| Case 36 | 17 | 66,939,019 | 66,959,710 | 5 | 0 | 5 | 1 |
| Case 36 | 17 | 66,962,196 | 69,709,054 | 7 | 0 | 7 | 1 |
| Case 36 | 17 | 69,711,678 | 78,280,988 | 6 | 0 | 6 | 1 |
| Case 36 | 17 | 78,283,987 | 78,354,756 | 5 | 0 | 5 | 1 |
| Case 36 | 17 | 78,355,176 | 81,060,040 | 6 | 0 | 6 | 1 |
| Case 36 | 18 | 87,505     | 642,678    | 3 | 2 | 5 | 0 |
| Case 36 | 18 | 645,051    | 674,325    | 5 | 1 | 6 | 0 |
| Case 36 | 18 | 674,354    | 13,058,318 | 3 | 2 | 5 | 0 |
| Case 36 | 18 | 13,059,175 | 15,375,878 | 2 | 2 | 4 | 0 |
| Case 36 | 18 | 18,520,354 | 19,154,752 | 2 | 2 | 4 | 0 |
| Case 36 | 18 | 19,155,511 | 20,573,157 | 3 | 2 | 5 | 0 |
| Case 36 | 18 | 20,573,213 | 51,321,476 | 2 | 2 | 4 | 0 |
| Case 36 | 18 | 51,327,866 | 54,057,112 | 2 | 0 | 2 | 1 |
| Case 36 | 18 | 54,059,039 | 54,328,216 | 3 | 0 | 3 | 1 |
| Case 36 | 18 | 54,358,999 | 54,690,152 | 2 | 0 | 2 | 1 |
| Case 36 | 18 | 54,690,271 | 55,240,505 | 3 | 0 | 3 | 1 |
| Case 36 | 18 | 55,243,164 | 55,362,532 | 2 | 0 | 2 | 1 |
| Case 36 | 18 | 55,364,830 | 55,661,297 | 3 | 0 | 3 | 1 |
| Case 36 | 18 | 55,661,823 | 55,828,612 | 2 | 0 | 2 | 1 |

|         |    |            |            |   |   |   |   |
|---------|----|------------|------------|---|---|---|---|
| Case 36 | 18 | 55,829,768 | 56,291,595 | 3 | 0 | 3 | 1 |
| Case 36 | 18 | 56,296,138 | 56,444,821 | 2 | 0 | 2 | 1 |
| Case 36 | 18 | 56,445,257 | 56,632,570 | 3 | 0 | 3 | 1 |
| Case 36 | 18 | 56,633,317 | 56,702,945 | 2 | 0 | 2 | 1 |
| Case 36 | 18 | 56,705,616 | 57,136,783 | 3 | 0 | 3 | 1 |
| Case 36 | 18 | 57,136,795 | 57,322,306 | 2 | 0 | 2 | 1 |
| Case 36 | 18 | 57,323,149 | 57,398,128 | 3 | 0 | 3 | 1 |
| Case 36 | 18 | 57,398,775 | 58,036,503 | 2 | 0 | 2 | 1 |
| Case 36 | 18 | 58,037,433 | 58,040,587 | 3 | 0 | 3 | 1 |
| Case 36 | 18 | 58,049,192 | 58,764,375 | 2 | 0 | 2 | 1 |
| Case 36 | 18 | 58,765,118 | 59,002,954 | 3 | 0 | 3 | 1 |
| Case 36 | 18 | 59,003,714 | 59,203,382 | 2 | 0 | 2 | 1 |
| Case 36 | 18 | 59,205,707 | 59,577,310 | 3 | 0 | 3 | 1 |
| Case 36 | 18 | 59,579,209 | 59,958,824 | 2 | 0 | 2 | 1 |
| Case 36 | 18 | 59,970,583 | 60,122,898 | 3 | 0 | 3 | 1 |
| Case 36 | 18 | 60,123,526 | 60,232,303 | 2 | 0 | 2 | 1 |
| Case 36 | 18 | 60,232,314 | 60,321,002 | 3 | 0 | 3 | 1 |
| Case 36 | 18 | 60,323,254 | 60,647,072 | 2 | 0 | 2 | 1 |
| Case 36 | 18 | 60,648,872 | 61,013,905 | 3 | 0 | 3 | 1 |
| Case 36 | 18 | 61,022,115 | 61,163,084 | 2 | 0 | 2 | 1 |
| Case 36 | 18 | 61,163,925 | 61,262,367 | 3 | 0 | 3 | 1 |
| Case 36 | 18 | 61,264,298 | 67,918,308 | 2 | 0 | 2 | 1 |
| Case 36 | 18 | 67,920,269 | 68,140,829 | 3 | 0 | 3 | 1 |
| Case 36 | 18 | 68,142,414 | 68,449,616 | 2 | 0 | 2 | 1 |
| Case 36 | 18 | 68,453,127 | 68,491,824 | 3 | 0 | 3 | 1 |
| Case 36 | 18 | 68,497,445 | 71,467,050 | 2 | 0 | 2 | 1 |
| Case 36 | 18 | 71,467,427 | 71,625,573 | 3 | 0 | 3 | 1 |
| Case 36 | 18 | 71,626,962 | 71,702,113 | 2 | 0 | 2 | 1 |
| Case 36 | 18 | 71,702,374 | 71,789,784 | 3 | 0 | 3 | 1 |
| Case 36 | 18 | 71,791,730 | 71,810,010 | 2 | 0 | 2 | 1 |
| Case 36 | 18 | 71,815,122 | 71,992,294 | 3 | 0 | 3 | 1 |
| Case 36 | 18 | 71,993,111 | 72,075,994 | 2 | 0 | 2 | 1 |
| Case 36 | 18 | 72,076,567 | 72,255,107 | 3 | 0 | 3 | 1 |
| Case 36 | 18 | 72,256,617 | 72,665,384 | 2 | 0 | 2 | 1 |
| Case 36 | 18 | 72,669,937 | 73,208,445 | 3 | 0 | 3 | 1 |
| Case 36 | 18 | 73,209,334 | 73,318,771 | 2 | 0 | 2 | 1 |
| Case 36 | 18 | 73,330,240 | 73,526,297 | 3 | 0 | 3 | 1 |
| Case 36 | 18 | 73,526,880 | 73,807,177 | 2 | 0 | 2 | 1 |
| Case 36 | 18 | 73,811,509 | 74,378,063 | 3 | 0 | 3 | 1 |
| Case 36 | 18 | 74,378,395 | 74,682,214 | 2 | 0 | 2 | 1 |
| Case 36 | 18 | 74,683,389 | 74,884,667 | 3 | 0 | 3 | 1 |
| Case 36 | 18 | 74,885,488 | 76,153,361 | 2 | 0 | 2 | 1 |
| Case 36 | 18 | 76,154,754 | 76,704,368 | 3 | 0 | 3 | 1 |
| Case 36 | 18 | 76,705,614 | 76,754,200 | 2 | 0 | 2 | 1 |
| Case 36 | 18 | 76,754,380 | 76,856,499 | 3 | 0 | 3 | 1 |
| Case 36 | 18 | 76,856,565 | 77,100,844 | 2 | 0 | 2 | 1 |
| Case 36 | 18 | 77,104,269 | 77,679,290 | 3 | 0 | 3 | 1 |
| Case 36 | 18 | 77,679,361 | 78,015,180 | 2 | 0 | 2 | 1 |
| Case 36 | 19 | 260,912    | 3,328,734  | 2 | 2 | 4 | 0 |
| Case 36 | 19 | 3,329,809  | 3,397,431  | 3 | 2 | 5 | 0 |
| Case 36 | 19 | 3,403,231  | 7,743,845  | 2 | 2 | 4 | 0 |
| Case 36 | 19 | 7,743,869  | 7,769,188  | 3 | 2 | 5 | 0 |
| Case 36 | 19 | 7,769,566  | 24,629,285 | 2 | 2 | 4 | 0 |
| Case 36 | 19 | 27,732,159 | 42,171,906 | 2 | 2 | 4 | 0 |
| Case 36 | 19 | 42,175,160 | 42,220,409 | 3 | 2 | 5 | 0 |
| Case 36 | 19 | 42,221,418 | 49,171,593 | 2 | 2 | 4 | 0 |
| Case 36 | 19 | 49,174,077 | 49,206,631 | 2 | 1 | 3 | 0 |
| Case 36 | 19 | 49,206,658 | 49,431,839 | 2 | 2 | 4 | 0 |
| Case 36 | 19 | 49,436,980 | 49,439,363 | 2 | 0 | 2 | 1 |
| Case 36 | 19 | 49,439,401 | 53,311,563 | 2 | 2 | 4 | 0 |
| Case 36 | 19 | 53,332,039 | 53,358,889 | 4 | 2 | 6 | 0 |

|         |    |             |             |   |   |   |   |
|---------|----|-------------|-------------|---|---|---|---|
| Case 36 | 19 | 53,363,030  | 59,097,160  | 2 | 2 | 4 | 0 |
| Case 36 | 20 | 63,244      | 26,293,985  | 2 | 2 | 4 | 0 |
| Case 36 | 20 | 29,425,357  | 35,335,891  | 2 | 2 | 4 | 0 |
| Case 36 | 20 | 35,343,830  | 50,309,602  | 3 | 2 | 5 | 0 |
| Case 36 | 20 | 50,310,547  | 50,453,628  | 5 | 1 | 6 | 0 |
| Case 36 | 20 | 50,455,228  | 50,699,305  | 5 | 2 | 7 | 0 |
| Case 36 | 20 | 50,701,061  | 50,937,458  | 5 | 1 | 6 | 0 |
| Case 36 | 20 | 50,957,837  | 62,948,788  | 3 | 2 | 5 | 0 |
| Case 36 | 21 | 10,827,533  | 10,906,922  | 2 | 2 | 4 | 0 |
| Case 36 | 21 | 10,906,936  | 10,971,337  | 2 | 1 | 3 | 0 |
| Case 36 | 21 | 14,368,320  | 15,630,812  | 2 | 1 | 3 | 0 |
| Case 36 | 21 | 15,634,304  | 15,711,567  | 2 | 2 | 4 | 0 |
| Case 36 | 21 | 15,711,772  | 15,899,720  | 2 | 1 | 3 | 0 |
| Case 36 | 21 | 15,902,978  | 17,691,547  | 2 | 2 | 4 | 0 |
| Case 36 | 21 | 17,693,665  | 17,822,269  | 2 | 1 | 3 | 0 |
| Case 36 | 21 | 17,826,260  | 19,678,660  | 2 | 2 | 4 | 0 |
| Case 36 | 21 | 19,678,760  | 25,900,645  | 2 | 1 | 3 | 0 |
| Case 36 | 21 | 25,903,696  | 26,147,773  | 2 | 2 | 4 | 0 |
| Case 36 | 21 | 26,148,903  | 26,514,801  | 2 | 1 | 3 | 0 |
| Case 36 | 21 | 26,518,687  | 28,957,144  | 2 | 2 | 4 | 0 |
| Case 36 | 21 | 28,957,233  | 29,552,934  | 2 | 1 | 3 | 0 |
| Case 36 | 21 | 29,556,000  | 36,241,929  | 2 | 2 | 4 | 0 |
| Case 36 | 21 | 36,245,198  | 36,727,663  | 3 | 0 | 3 | 1 |
| Case 36 | 21 | 36,730,471  | 36,916,787  | 2 | 0 | 2 | 1 |
| Case 36 | 21 | 36,919,816  | 37,832,621  | 3 | 0 | 3 | 1 |
| Case 36 | 21 | 37,833,307  | 37,833,983  | 2 | 0 | 2 | 1 |
| Case 36 | 21 | 37,834,258  | 38,563,686  | 3 | 0 | 3 | 1 |
| Case 36 | 21 | 38,563,725  | 38,599,958  | 2 | 0 | 2 | 1 |
| Case 36 | 21 | 38,600,106  | 40,551,898  | 3 | 0 | 3 | 1 |
| Case 36 | 21 | 40,552,307  | 40,669,083  | 2 | 0 | 2 | 1 |
| Case 36 | 21 | 40,669,305  | 40,780,560  | 3 | 0 | 3 | 1 |
| Case 36 | 21 | 40,781,985  | 40,843,234  | 2 | 0 | 2 | 1 |
| Case 36 | 21 | 40,844,300  | 41,527,915  | 3 | 0 | 3 | 1 |
| Case 36 | 21 | 41,531,974  | 41,776,253  | 2 | 0 | 2 | 1 |
| Case 36 | 21 | 41,780,398  | 47,821,583  | 3 | 0 | 3 | 1 |
| Case 36 | 21 | 47,821,588  | 47,863,853  | 2 | 0 | 2 | 1 |
| Case 36 | 21 | 47,864,633  | 48,100,155  | 3 | 0 | 3 | 1 |
| Case 36 | 22 | 16,114,244  | 51,195,728  | 2 | 2 | 4 | 0 |
| Case 40 | 1  | 82,154      | 1,398,008   | 2 | 1 | 3 | 0 |
| Case 40 | 1  | 1,398,032   | 1,706,136   | 2 | 2 | 4 | 0 |
| Case 40 | 1  | 1,706,160   | 31,618,766  | 2 | 1 | 3 | 0 |
| Case 40 | 1  | 31,650,749  | 31,731,208  | 2 | 2 | 4 | 0 |
| Case 40 | 1  | 31,732,788  | 121,346,616 | 2 | 1 | 3 | 0 |
| Case 40 | 1  | 142,649,718 | 144,931,626 | 2 | 1 | 3 | 0 |
| Case 40 | 1  | 144,935,753 | 159,357,684 | 2 | 2 | 4 | 0 |
| Case 40 | 1  | 159,374,604 | 204,123,999 | 4 | 0 | 4 | 1 |
| Case 40 | 1  | 204,125,029 | 206,933,490 | 3 | 0 | 3 | 1 |
| Case 40 | 1  | 206,939,904 | 207,139,123 | 4 | 0 | 4 | 1 |
| Case 40 | 1  | 207,140,447 | 215,094,201 | 3 | 0 | 3 | 1 |
| Case 40 | 1  | 215,102,445 | 215,989,973 | 4 | 0 | 4 | 1 |
| Case 40 | 1  | 215,990,479 | 249,218,992 | 3 | 0 | 3 | 1 |
| Case 40 | 2  | 18,674      | 92,035,041  | 4 | 0 | 4 | 1 |
| Case 40 | 2  | 92,050,792  | 92,081,640  | 2 | 2 | 4 | 0 |
| Case 40 | 2  | 95,429,424  | 140,922,911 | 2 | 2 | 4 | 0 |
| Case 40 | 2  | 140,923,936 | 141,279,943 | 2 | 1 | 3 | 0 |
| Case 40 | 2  | 141,281,486 | 195,986,610 | 2 | 2 | 4 | 0 |
| Case 40 | 2  | 195,993,306 | 195,993,600 | 4 | 0 | 4 | 1 |
| Case 40 | 2  | 196,002,614 | 196,272,121 | 3 | 0 | 3 | 1 |
| Case 40 | 2  | 196,272,301 | 243,048,760 | 2 | 2 | 4 | 0 |
| Case 40 | 3  | 61,495      | 3,884,459   | 2 | 0 | 2 | 1 |
| Case 40 | 3  | 3,885,609   | 3,915,943   | 3 | 0 | 3 | 1 |

|         |   |            |            |   |   |   |   |
|---------|---|------------|------------|---|---|---|---|
| Case 40 | 3 | 3,916,426  | 4,530,278  | 2 | 0 | 2 | 1 |
| Case 40 | 3 | 4,531,076  | 5,082,256  | 3 | 0 | 3 | 1 |
| Case 40 | 3 | 5,082,955  | 8,524,337  | 2 | 0 | 2 | 1 |
| Case 40 | 3 | 8,528,431  | 8,542,278  | 3 | 0 | 3 | 1 |
| Case 40 | 3 | 8,546,102  | 8,550,015  | 2 | 0 | 2 | 1 |
| Case 40 | 3 | 8,551,112  | 8,788,096  | 3 | 0 | 3 | 1 |
| Case 40 | 3 | 8,788,336  | 8,809,741  | 2 | 0 | 2 | 1 |
| Case 40 | 3 | 8,810,896  | 8,926,733  | 3 | 0 | 3 | 1 |
| Case 40 | 3 | 8,932,189  | 9,079,291  | 2 | 0 | 2 | 1 |
| Case 40 | 3 | 9,079,714  | 9,358,616  | 3 | 0 | 3 | 1 |
| Case 40 | 3 | 9,363,272  | 9,517,217  | 2 | 0 | 2 | 1 |
| Case 40 | 3 | 9,517,369  | 9,969,994  | 3 | 0 | 3 | 1 |
| Case 40 | 3 | 9,970,030  | 10,089,689 | 2 | 0 | 2 | 1 |
| Case 40 | 3 | 10,094,126 | 10,933,887 | 3 | 0 | 3 | 1 |
| Case 40 | 3 | 10,937,056 | 10,966,711 | 2 | 0 | 2 | 1 |
| Case 40 | 3 | 10,967,342 | 12,232,046 | 3 | 0 | 3 | 1 |
| Case 40 | 3 | 12,233,482 | 12,461,932 | 2 | 0 | 2 | 1 |
| Case 40 | 3 | 12,462,024 | 12,544,761 | 3 | 0 | 3 | 1 |
| Case 40 | 3 | 12,544,774 | 12,859,342 | 2 | 0 | 2 | 1 |
| Case 40 | 3 | 12,860,988 | 15,152,062 | 3 | 0 | 3 | 1 |
| Case 40 | 3 | 15,152,762 | 15,516,910 | 2 | 0 | 2 | 1 |
| Case 40 | 3 | 15,518,889 | 15,709,140 | 3 | 0 | 3 | 1 |
| Case 40 | 3 | 15,716,898 | 15,927,193 | 2 | 0 | 2 | 1 |
| Case 40 | 3 | 15,933,741 | 16,330,513 | 3 | 0 | 3 | 1 |
| Case 40 | 3 | 16,332,988 | 24,038,687 | 2 | 0 | 2 | 1 |
| Case 40 | 3 | 24,043,710 | 24,169,493 | 3 | 0 | 3 | 1 |
| Case 40 | 3 | 24,169,726 | 25,575,675 | 2 | 0 | 2 | 1 |
| Case 40 | 3 | 25,576,865 | 25,621,302 | 3 | 0 | 3 | 1 |
| Case 40 | 3 | 25,622,155 | 31,394,943 | 2 | 0 | 2 | 1 |
| Case 40 | 3 | 31,400,889 | 32,030,662 | 3 | 0 | 3 | 1 |
| Case 40 | 3 | 32,030,881 | 32,409,410 | 2 | 0 | 2 | 1 |
| Case 40 | 3 | 32,411,118 | 32,545,691 | 3 | 0 | 3 | 1 |
| Case 40 | 3 | 32,551,946 | 32,844,155 | 2 | 0 | 2 | 1 |
| Case 40 | 3 | 32,858,557 | 33,289,596 | 3 | 0 | 3 | 1 |
| Case 40 | 3 | 33,292,542 | 33,917,150 | 2 | 0 | 2 | 1 |
| Case 40 | 3 | 33,926,125 | 34,084,684 | 3 | 0 | 3 | 1 |
| Case 40 | 3 | 34,086,193 | 36,756,821 | 2 | 0 | 2 | 1 |
| Case 40 | 3 | 36,756,863 | 36,962,588 | 3 | 0 | 3 | 1 |
| Case 40 | 3 | 36,965,158 | 37,458,851 | 2 | 0 | 2 | 1 |
| Case 40 | 3 | 37,458,926 | 38,598,067 | 3 | 0 | 3 | 1 |
| Case 40 | 3 | 38,599,037 | 38,651,264 | 2 | 0 | 2 | 1 |
| Case 40 | 3 | 38,651,303 | 39,091,812 | 3 | 0 | 3 | 1 |
| Case 40 | 3 | 39,093,326 | 39,140,972 | 2 | 0 | 2 | 1 |
| Case 40 | 3 | 39,141,944 | 39,180,100 | 3 | 0 | 3 | 1 |
| Case 40 | 3 | 39,180,263 | 39,225,442 | 2 | 0 | 2 | 1 |
| Case 40 | 3 | 39,225,585 | 40,219,446 | 3 | 0 | 3 | 1 |
| Case 40 | 3 | 40,223,615 | 40,362,122 | 2 | 0 | 2 | 1 |
| Case 40 | 3 | 40,367,524 | 40,499,445 | 3 | 0 | 3 | 1 |
| Case 40 | 3 | 40,500,154 | 41,063,002 | 2 | 0 | 2 | 1 |
| Case 40 | 3 | 41,063,760 | 41,414,528 | 3 | 0 | 3 | 1 |
| Case 40 | 3 | 41,420,792 | 41,960,006 | 2 | 0 | 2 | 1 |
| Case 40 | 3 | 41,961,168 | 42,550,651 | 3 | 0 | 3 | 1 |
| Case 40 | 3 | 42,551,373 | 42,716,120 | 2 | 0 | 2 | 1 |
| Case 40 | 3 | 42,723,605 | 42,740,553 | 3 | 0 | 3 | 1 |
| Case 40 | 3 | 42,740,576 | 42,856,350 | 2 | 0 | 2 | 1 |
| Case 40 | 3 | 42,863,739 | 43,125,481 | 3 | 0 | 3 | 1 |
| Case 40 | 3 | 43,132,444 | 44,943,104 | 2 | 0 | 2 | 1 |
| Case 40 | 3 | 44,943,164 | 46,003,807 | 3 | 0 | 3 | 1 |
| Case 40 | 3 | 46,003,831 | 46,245,329 | 2 | 0 | 2 | 1 |
| Case 40 | 3 | 46,245,424 | 46,866,866 | 3 | 0 | 3 | 1 |
| Case 40 | 3 | 46,871,917 | 46,916,051 | 2 | 0 | 2 | 1 |

|         |   |            |            |   |   |   |   |
|---------|---|------------|------------|---|---|---|---|
| Case 40 | 3 | 46,918,475 | 47,032,777 | 3 | 0 | 3 | 1 |
| Case 40 | 3 | 47,033,113 | 47,292,183 | 2 | 0 | 2 | 1 |
| Case 40 | 3 | 47,306,894 | 47,452,311 | 3 | 0 | 3 | 1 |
| Case 40 | 3 | 47,452,339 | 48,340,045 | 2 | 0 | 2 | 1 |
| Case 40 | 3 | 48,360,433 | 48,643,235 | 3 | 0 | 3 | 1 |
| Case 40 | 3 | 48,643,891 | 48,664,473 | 2 | 0 | 2 | 1 |
| Case 40 | 3 | 48,665,917 | 50,355,730 | 3 | 0 | 3 | 1 |
| Case 40 | 3 | 50,356,265 | 50,390,897 | 2 | 0 | 2 | 1 |
| Case 40 | 3 | 50,390,951 | 50,712,159 | 3 | 0 | 3 | 1 |
| Case 40 | 3 | 50,714,509 | 51,398,958 | 2 | 0 | 2 | 1 |
| Case 40 | 3 | 51,399,303 | 51,718,552 | 3 | 0 | 3 | 1 |
| Case 40 | 3 | 51,719,577 | 51,928,928 | 2 | 0 | 2 | 1 |
| Case 40 | 3 | 51,929,069 | 51,992,146 | 3 | 0 | 3 | 1 |
| Case 40 | 3 | 51,992,165 | 52,021,316 | 2 | 0 | 2 | 1 |
| Case 40 | 3 | 52,021,422 | 52,246,030 | 3 | 0 | 3 | 1 |
| Case 40 | 3 | 52,247,110 | 52,348,364 | 2 | 0 | 2 | 1 |
| Case 40 | 3 | 52,349,412 | 52,536,308 | 3 | 0 | 3 | 1 |
| Case 40 | 3 | 52,536,686 | 52,557,945 | 2 | 0 | 2 | 1 |
| Case 40 | 3 | 52,558,008 | 54,254,129 | 3 | 0 | 3 | 1 |
| Case 40 | 3 | 54,256,559 | 54,344,775 | 2 | 0 | 2 | 1 |
| Case 40 | 3 | 54,354,510 | 54,741,995 | 3 | 0 | 3 | 1 |
| Case 40 | 3 | 54,747,244 | 56,051,662 | 2 | 0 | 2 | 1 |
| Case 40 | 3 | 56,051,779 | 56,430,513 | 3 | 0 | 3 | 1 |
| Case 40 | 3 | 56,431,988 | 56,761,715 | 2 | 0 | 2 | 1 |
| Case 40 | 3 | 56,762,245 | 57,186,580 | 3 | 0 | 3 | 1 |
| Case 40 | 3 | 57,187,078 | 57,913,714 | 2 | 0 | 2 | 1 |
| Case 40 | 3 | 57,914,178 | 58,335,573 | 3 | 0 | 3 | 1 |
| Case 40 | 3 | 58,336,846 | 58,486,772 | 2 | 0 | 2 | 1 |
| Case 40 | 3 | 58,487,264 | 58,844,331 | 3 | 0 | 3 | 1 |
| Case 40 | 3 | 58,849,291 | 59,368,074 | 2 | 0 | 2 | 1 |
| Case 40 | 3 | 59,372,700 | 59,451,699 | 3 | 0 | 3 | 1 |
| Case 40 | 3 | 59,452,272 | 60,374,028 | 2 | 0 | 2 | 1 |
| Case 40 | 3 | 60,379,253 | 60,379,253 | 1 | 0 | 1 | 0 |
| Case 40 | 3 | 60,379,450 | 60,544,132 | 0 | 0 | 0 | 0 |
| Case 40 | 3 | 60,545,602 | 61,375,686 | 2 | 0 | 2 | 1 |
| Case 40 | 3 | 61,389,476 | 61,513,495 | 3 | 0 | 3 | 1 |
| Case 40 | 3 | 61,515,679 | 62,364,422 | 2 | 0 | 2 | 1 |
| Case 40 | 3 | 62,366,487 | 62,519,435 | 3 | 0 | 3 | 1 |
| Case 40 | 3 | 62,523,546 | 63,615,622 | 2 | 0 | 2 | 1 |
| Case 40 | 3 | 63,615,879 | 64,123,647 | 3 | 0 | 3 | 1 |
| Case 40 | 3 | 64,125,528 | 64,171,754 | 2 | 0 | 2 | 1 |
| Case 40 | 3 | 64,171,993 | 64,617,070 | 3 | 0 | 3 | 1 |
| Case 40 | 3 | 64,617,162 | 64,962,621 | 2 | 0 | 2 | 1 |
| Case 40 | 3 | 64,969,450 | 65,226,990 | 3 | 0 | 3 | 1 |
| Case 40 | 3 | 65,227,760 | 65,940,092 | 2 | 0 | 2 | 1 |
| Case 40 | 3 | 65,944,066 | 66,050,568 | 3 | 0 | 3 | 1 |
| Case 40 | 3 | 66,061,727 | 66,349,071 | 2 | 0 | 2 | 1 |
| Case 40 | 3 | 66,352,997 | 66,931,371 | 3 | 0 | 3 | 1 |
| Case 40 | 3 | 66,940,414 | 69,151,087 | 2 | 0 | 2 | 1 |
| Case 40 | 3 | 69,151,117 | 69,177,913 | 3 | 0 | 3 | 1 |
| Case 40 | 3 | 69,181,552 | 69,222,863 | 2 | 0 | 2 | 1 |
| Case 40 | 3 | 69,225,911 | 69,242,891 | 3 | 0 | 3 | 1 |
| Case 40 | 3 | 69,243,011 | 70,861,462 | 2 | 0 | 2 | 1 |
| Case 40 | 3 | 70,871,090 | 71,281,430 | 3 | 0 | 3 | 1 |
| Case 40 | 3 | 71,287,528 | 71,403,136 | 2 | 0 | 2 | 1 |
| Case 40 | 3 | 71,408,319 | 72,696,627 | 3 | 0 | 3 | 1 |
| Case 40 | 3 | 72,697,011 | 73,111,809 | 2 | 0 | 2 | 1 |
| Case 40 | 3 | 73,111,828 | 73,438,465 | 3 | 0 | 3 | 1 |
| Case 40 | 3 | 73,439,024 | 73,573,216 | 2 | 0 | 2 | 1 |
| Case 40 | 3 | 73,578,778 | 73,711,340 | 3 | 0 | 3 | 1 |
| Case 40 | 3 | 73,716,503 | 90,442,925 | 2 | 0 | 2 | 1 |

|         |   |             |             |   |   |   |   |
|---------|---|-------------|-------------|---|---|---|---|
| Case 40 | 3 | 93,537,290  | 112,879,711 | 2 | 0 | 2 | 1 |
| Case 40 | 3 | 112,881,539 | 112,980,483 | 3 | 0 | 3 | 1 |
| Case 40 | 3 | 112,987,262 | 113,320,312 | 2 | 0 | 2 | 1 |
| Case 40 | 3 | 113,320,477 | 113,375,764 | 3 | 0 | 3 | 1 |
| Case 40 | 3 | 113,375,772 | 119,822,335 | 2 | 0 | 2 | 1 |
| Case 40 | 3 | 119,824,037 | 120,194,615 | 3 | 0 | 3 | 1 |
| Case 40 | 3 | 120,199,413 | 121,289,594 | 2 | 0 | 2 | 1 |
| Case 40 | 3 | 121,294,785 | 121,354,620 | 3 | 0 | 3 | 1 |
| Case 40 | 3 | 121,354,642 | 122,289,303 | 2 | 0 | 2 | 1 |
| Case 40 | 3 | 122,289,369 | 122,422,901 | 3 | 0 | 3 | 1 |
| Case 40 | 3 | 122,423,256 | 122,661,863 | 2 | 0 | 2 | 1 |
| Case 40 | 3 | 122,662,308 | 123,458,823 | 3 | 0 | 3 | 1 |
| Case 40 | 3 | 123,458,839 | 123,807,012 | 2 | 0 | 2 | 1 |
| Case 40 | 3 | 123,810,460 | 124,515,354 | 3 | 0 | 3 | 1 |
| Case 40 | 3 | 124,515,395 | 124,578,203 | 2 | 0 | 2 | 1 |
| Case 40 | 3 | 124,578,212 | 124,911,841 | 3 | 0 | 3 | 1 |
| Case 40 | 3 | 124,915,818 | 125,595,987 | 2 | 0 | 2 | 1 |
| Case 40 | 3 | 125,620,850 | 125,849,099 | 3 | 0 | 3 | 1 |
| Case 40 | 3 | 125,849,714 | 126,757,949 | 2 | 0 | 2 | 1 |
| Case 40 | 3 | 126,759,984 | 129,695,893 | 3 | 0 | 3 | 1 |
| Case 40 | 3 | 129,695,954 | 130,977,900 | 2 | 0 | 2 | 1 |
| Case 40 | 3 | 130,992,343 | 131,321,322 | 3 | 0 | 3 | 1 |
| Case 40 | 3 | 131,322,261 | 132,639,561 | 2 | 0 | 2 | 1 |
| Case 40 | 3 | 132,640,698 | 133,191,330 | 3 | 0 | 3 | 1 |
| Case 40 | 3 | 133,191,385 | 133,466,222 | 2 | 0 | 2 | 1 |
| Case 40 | 3 | 133,466,374 | 134,078,284 | 3 | 0 | 3 | 1 |
| Case 40 | 3 | 134,079,019 | 134,514,510 | 2 | 0 | 2 | 1 |
| Case 40 | 3 | 134,514,525 | 135,274,861 | 3 | 0 | 3 | 1 |
| Case 40 | 3 | 135,275,666 | 135,870,984 | 2 | 0 | 2 | 1 |
| Case 40 | 3 | 135,871,179 | 136,056,861 | 3 | 0 | 3 | 1 |
| Case 40 | 3 | 136,062,724 | 138,053,187 | 2 | 0 | 2 | 1 |
| Case 40 | 3 | 138,054,521 | 138,194,435 | 3 | 0 | 3 | 1 |
| Case 40 | 3 | 138,216,713 | 138,730,737 | 2 | 0 | 2 | 1 |
| Case 40 | 3 | 138,734,214 | 139,500,341 | 3 | 0 | 3 | 1 |
| Case 40 | 3 | 139,502,118 | 140,164,908 | 2 | 0 | 2 | 1 |
| Case 40 | 3 | 140,167,131 | 141,457,998 | 3 | 0 | 3 | 1 |
| Case 40 | 3 | 141,463,267 | 142,526,594 | 2 | 0 | 2 | 1 |
| Case 40 | 3 | 142,537,215 | 143,058,731 | 3 | 0 | 3 | 1 |
| Case 40 | 3 | 143,059,497 | 149,112,810 | 2 | 0 | 2 | 1 |
| Case 40 | 3 | 149,114,614 | 149,246,213 | 3 | 0 | 3 | 1 |
| Case 40 | 3 | 149,247,639 | 150,580,747 | 2 | 0 | 2 | 1 |
| Case 40 | 3 | 150,582,992 | 150,854,520 | 3 | 0 | 3 | 1 |
| Case 40 | 3 | 150,857,406 | 151,112,568 | 2 | 0 | 2 | 1 |
| Case 40 | 3 | 151,115,991 | 151,165,532 | 3 | 0 | 3 | 1 |
| Case 40 | 3 | 151,165,610 | 169,633,705 | 2 | 0 | 2 | 1 |
| Case 40 | 3 | 169,633,958 | 169,683,036 | 3 | 0 | 3 | 1 |
| Case 40 | 3 | 169,687,607 | 170,147,991 | 2 | 0 | 2 | 1 |
| Case 40 | 3 | 170,150,076 | 170,587,949 | 3 | 0 | 3 | 1 |
| Case 40 | 3 | 170,589,304 | 171,780,763 | 2 | 0 | 2 | 1 |
| Case 40 | 3 | 171,791,275 | 172,081,022 | 3 | 0 | 3 | 1 |
| Case 40 | 3 | 172,087,898 | 179,320,544 | 2 | 0 | 2 | 1 |
| Case 40 | 3 | 179,322,385 | 179,499,215 | 3 | 0 | 3 | 1 |
| Case 40 | 3 | 179,501,900 | 182,826,316 | 2 | 0 | 2 | 1 |
| Case 40 | 3 | 182,831,612 | 183,335,081 | 3 | 0 | 3 | 1 |
| Case 40 | 3 | 183,335,322 | 183,443,634 | 2 | 0 | 2 | 1 |
| Case 40 | 3 | 183,452,125 | 183,607,661 | 3 | 0 | 3 | 1 |
| Case 40 | 3 | 183,621,991 | 183,671,306 | 4 | 0 | 4 | 1 |
| Case 40 | 3 | 183,672,280 | 183,689,989 | 3 | 0 | 3 | 1 |
| Case 40 | 3 | 183,690,243 | 183,761,664 | 2 | 0 | 2 | 1 |
| Case 40 | 3 | 183,768,336 | 184,523,185 | 3 | 0 | 3 | 1 |
| Case 40 | 3 | 184,525,426 | 184,717,530 | 2 | 0 | 2 | 1 |

|         |   |             |             |   |   |   |   |
|---------|---|-------------|-------------|---|---|---|---|
| Case 40 | 3 | 184,717,603 | 186,395,400 | 3 | 0 | 3 | 1 |
| Case 40 | 3 | 186,395,436 | 186,510,454 | 2 | 0 | 2 | 1 |
| Case 40 | 3 | 186,510,593 | 187,951,892 | 3 | 0 | 3 | 1 |
| Case 40 | 3 | 187,968,192 | 188,860,551 | 2 | 0 | 2 | 1 |
| Case 40 | 3 | 188,868,715 | 189,057,350 | 3 | 0 | 3 | 1 |
| Case 40 | 3 | 189,059,421 | 192,531,202 | 2 | 0 | 2 | 1 |
| Case 40 | 3 | 192,536,466 | 193,130,384 | 3 | 0 | 3 | 1 |
| Case 40 | 3 | 193,132,381 | 193,415,750 | 2 | 0 | 2 | 1 |
| Case 40 | 3 | 193,417,179 | 194,126,767 | 3 | 0 | 3 | 1 |
| Case 40 | 3 | 194,134,567 | 194,325,142 | 2 | 0 | 2 | 1 |
| Case 40 | 3 | 194,325,496 | 196,452,238 | 3 | 0 | 3 | 1 |
| Case 40 | 3 | 196,453,467 | 197,058,402 | 2 | 0 | 2 | 1 |
| Case 40 | 3 | 197,060,036 | 197,431,458 | 3 | 0 | 3 | 1 |
| Case 40 | 3 | 197,431,479 | 197,619,527 | 2 | 0 | 2 | 1 |
| Case 40 | 3 | 197,619,588 | 197,838,262 | 3 | 0 | 3 | 1 |
| Case 40 | 4 | 71,566      | 504,012     | 2 | 0 | 2 | 1 |
| Case 40 | 4 | 509,850     | 798,511     | 3 | 0 | 3 | 1 |
| Case 40 | 4 | 798,962     | 848,280     | 2 | 0 | 2 | 1 |
| Case 40 | 4 | 852,313     | 951,622     | 3 | 0 | 3 | 1 |
| Case 40 | 4 | 951,623     | 985,076     | 2 | 0 | 2 | 1 |
| Case 40 | 4 | 985,092     | 1,725,570   | 3 | 0 | 3 | 1 |
| Case 40 | 4 | 1,728,120   | 1,730,308   | 2 | 0 | 2 | 1 |
| Case 40 | 4 | 1,730,313   | 2,129,906   | 3 | 0 | 3 | 1 |
| Case 40 | 4 | 2,129,943   | 2,311,361   | 2 | 0 | 2 | 1 |
| Case 40 | 4 | 2,316,874   | 3,430,406   | 3 | 0 | 3 | 1 |
| Case 40 | 4 | 3,430,862   | 3,516,501   | 2 | 0 | 2 | 1 |
| Case 40 | 4 | 3,519,881   | 3,740,612   | 3 | 0 | 3 | 1 |
| Case 40 | 4 | 3,741,038   | 4,238,315   | 2 | 0 | 2 | 1 |
| Case 40 | 4 | 4,239,661   | 4,890,733   | 3 | 0 | 3 | 1 |
| Case 40 | 4 | 4,891,148   | 5,112,978   | 2 | 0 | 2 | 1 |
| Case 40 | 4 | 5,115,426   | 5,397,383   | 3 | 0 | 3 | 1 |
| Case 40 | 4 | 5,397,431   | 5,744,506   | 2 | 0 | 2 | 1 |
| Case 40 | 4 | 5,745,304   | 5,758,066   | 3 | 0 | 3 | 1 |
| Case 40 | 4 | 5,758,869   | 5,819,967   | 2 | 0 | 2 | 1 |
| Case 40 | 4 | 5,820,158   | 8,218,825   | 3 | 0 | 3 | 1 |
| Case 40 | 4 | 8,218,840   | 8,394,463   | 2 | 0 | 2 | 1 |
| Case 40 | 4 | 8,396,382   | 10,446,208  | 3 | 0 | 3 | 1 |
| Case 40 | 4 | 10,446,274  | 10,557,861  | 2 | 0 | 2 | 1 |
| Case 40 | 4 | 10,559,041  | 10,831,659  | 3 | 0 | 3 | 1 |
| Case 40 | 4 | 10,831,736  | 10,877,223  | 2 | 0 | 2 | 1 |
| Case 40 | 4 | 10,883,658  | 11,527,822  | 3 | 0 | 3 | 1 |
| Case 40 | 4 | 11,529,707  | 13,600,588  | 2 | 0 | 2 | 1 |
| Case 40 | 4 | 13,600,728  | 13,603,373  | 3 | 0 | 3 | 1 |
| Case 40 | 4 | 13,603,591  | 14,812,935  | 2 | 0 | 2 | 1 |
| Case 40 | 4 | 14,818,982  | 14,926,218  | 3 | 0 | 3 | 1 |
| Case 40 | 4 | 14,927,008  | 15,692,058  | 2 | 0 | 2 | 1 |
| Case 40 | 4 | 15,692,954  | 17,488,351  | 3 | 0 | 3 | 1 |
| Case 40 | 4 | 17,491,913  | 23,957,254  | 2 | 0 | 2 | 1 |
| Case 40 | 4 | 23,958,805  | 24,740,958  | 3 | 0 | 3 | 1 |
| Case 40 | 4 | 24,742,042  | 25,415,982  | 2 | 0 | 2 | 1 |
| Case 40 | 4 | 25,417,244  | 26,218,025  | 3 | 0 | 3 | 1 |
| Case 40 | 4 | 26,219,793  | 37,612,047  | 2 | 0 | 2 | 1 |
| Case 40 | 4 | 37,612,526  | 38,219,277  | 3 | 0 | 3 | 1 |
| Case 40 | 4 | 38,225,077  | 38,596,365  | 2 | 0 | 2 | 1 |
| Case 40 | 4 | 38,596,653  | 38,776,070  | 3 | 0 | 3 | 1 |
| Case 40 | 4 | 38,776,104  | 38,830,919  | 2 | 0 | 2 | 1 |
| Case 40 | 4 | 38,831,007  | 39,098,321  | 3 | 0 | 3 | 1 |
| Case 40 | 4 | 39,116,798  | 40,172,933  | 2 | 0 | 2 | 1 |
| Case 40 | 4 | 40,173,103  | 40,345,239  | 3 | 0 | 3 | 1 |
| Case 40 | 4 | 40,350,147  | 40,391,816  | 2 | 0 | 2 | 1 |
| Case 40 | 4 | 40,393,828  | 40,440,552  | 3 | 0 | 3 | 1 |



|         |   |             |             |   |   |   |   |
|---------|---|-------------|-------------|---|---|---|---|
| Case 40 | 4 | 40,440,643  | 40,815,268  | 2 | 0 | 2 | 1 |
| Case 40 | 4 | 40,818,170  | 41,123,834  | 3 | 0 | 3 | 1 |
| Case 40 | 4 | 41,126,094  | 41,411,891  | 2 | 0 | 2 | 1 |
| Case 40 | 4 | 41,421,908  | 41,711,689  | 3 | 0 | 3 | 1 |
| Case 40 | 4 | 41,712,381  | 49,620,898  | 2 | 0 | 2 | 1 |
| Case 40 | 4 | 52,697,856  | 52,945,961  | 2 | 0 | 2 | 1 |
| Case 40 | 4 | 52,946,161  | 53,880,619  | 3 | 0 | 3 | 1 |
| Case 40 | 4 | 53,888,072  | 54,403,898  | 2 | 0 | 2 | 1 |
| Case 40 | 4 | 54,409,561  | 54,621,715  | 3 | 0 | 3 | 1 |
| Case 40 | 4 | 54,624,264  | 57,170,069  | 2 | 0 | 2 | 1 |
| Case 40 | 4 | 57,172,978  | 57,237,683  | 3 | 0 | 3 | 1 |
| Case 40 | 4 | 57,237,688  | 75,851,372  | 2 | 0 | 2 | 1 |
| Case 40 | 4 | 75,857,836  | 75,998,962  | 3 | 0 | 3 | 1 |
| Case 40 | 4 | 76,005,892  | 77,324,343  | 2 | 0 | 2 | 1 |
| Case 40 | 4 | 77,330,682  | 77,721,997  | 3 | 0 | 3 | 1 |
| Case 40 | 4 | 77,724,484  | 77,804,009  | 2 | 0 | 2 | 1 |
| Case 40 | 4 | 77,806,097  | 77,868,340  | 3 | 0 | 3 | 1 |
| Case 40 | 4 | 77,871,016  | 78,103,458  | 2 | 0 | 2 | 1 |
| Case 40 | 4 | 78,106,123  | 78,426,029  | 3 | 0 | 3 | 1 |
| Case 40 | 4 | 78,432,340  | 78,871,021  | 2 | 0 | 2 | 1 |
| Case 40 | 4 | 78,875,974  | 79,236,838  | 3 | 0 | 3 | 1 |
| Case 40 | 4 | 79,236,852  | 79,385,632  | 2 | 0 | 2 | 1 |
| Case 40 | 4 | 79,385,640  | 79,439,935  | 3 | 0 | 3 | 1 |
| Case 40 | 4 | 79,440,521  | 83,321,808  | 2 | 0 | 2 | 1 |
| Case 40 | 4 | 83,323,062  | 83,700,755  | 3 | 0 | 3 | 1 |
| Case 40 | 4 | 83,710,092  | 87,968,165  | 2 | 0 | 2 | 1 |
| Case 40 | 4 | 87,968,271  | 88,067,504  | 3 | 0 | 3 | 1 |
| Case 40 | 4 | 88,067,584  | 88,533,441  | 2 | 0 | 2 | 1 |
| Case 40 | 4 | 88,533,540  | 88,535,073  | 3 | 0 | 3 | 1 |
| Case 40 | 4 | 88,535,592  | 113,244,979 | 2 | 0 | 2 | 1 |
| Case 40 | 4 | 113,246,438 | 113,354,150 | 3 | 0 | 3 | 1 |
| Case 40 | 4 | 113,356,306 | 119,934,384 | 2 | 0 | 2 | 1 |
| Case 40 | 4 | 119,941,399 | 119,956,089 | 3 | 0 | 3 | 1 |
| Case 40 | 4 | 119,956,411 | 122,137,121 | 2 | 0 | 2 | 1 |
| Case 40 | 4 | 122,142,224 | 122,250,603 | 3 | 0 | 3 | 1 |
| Case 40 | 4 | 122,250,654 | 129,232,129 | 2 | 0 | 2 | 1 |
| Case 40 | 4 | 129,239,583 | 129,778,510 | 3 | 0 | 3 | 1 |
| Case 40 | 4 | 129,779,076 | 139,711,726 | 2 | 0 | 2 | 1 |
| Case 40 | 4 | 139,716,412 | 139,981,623 | 3 | 0 | 3 | 1 |
| Case 40 | 4 | 139,981,918 | 140,406,214 | 2 | 0 | 2 | 1 |
| Case 40 | 4 | 140,406,637 | 141,055,896 | 3 | 0 | 3 | 1 |
| Case 40 | 4 | 141,060,111 | 141,543,915 | 2 | 0 | 2 | 1 |
| Case 40 | 4 | 141,544,016 | 141,881,246 | 3 | 0 | 3 | 1 |
| Case 40 | 4 | 141,882,031 | 146,639,208 | 2 | 0 | 2 | 1 |
| Case 40 | 4 | 146,639,774 | 146,870,765 | 3 | 0 | 3 | 1 |
| Case 40 | 4 | 146,875,551 | 153,896,691 | 2 | 0 | 2 | 1 |
| Case 40 | 4 | 153,896,780 | 154,461,884 | 3 | 0 | 3 | 1 |
| Case 40 | 4 | 154,465,994 | 169,505,090 | 2 | 0 | 2 | 1 |
| Case 40 | 4 | 169,506,877 | 169,567,817 | 3 | 0 | 3 | 1 |
| Case 40 | 4 | 169,569,729 | 169,589,214 | 2 | 0 | 2 | 1 |
| Case 40 | 4 | 169,589,341 | 169,764,312 | 3 | 0 | 3 | 1 |
| Case 40 | 4 | 169,764,489 | 183,659,649 | 2 | 0 | 2 | 1 |
| Case 40 | 4 | 183,661,413 | 184,335,306 | 3 | 0 | 3 | 1 |
| Case 40 | 4 | 184,338,589 | 184,639,740 | 2 | 0 | 2 | 1 |
| Case 40 | 4 | 184,641,445 | 185,543,672 | 3 | 0 | 3 | 1 |
| Case 40 | 4 | 185,548,951 | 185,655,214 | 2 | 0 | 2 | 1 |
| Case 40 | 4 | 185,655,676 | 185,746,088 | 3 | 0 | 3 | 1 |
| Case 40 | 4 | 185,750,840 | 185,801,346 | 2 | 0 | 2 | 1 |
| Case 40 | 4 | 185,801,567 | 186,071,932 | 3 | 0 | 3 | 1 |
| Case 40 | 4 | 186,072,110 | 186,697,494 | 2 | 0 | 2 | 1 |
| Case 40 | 4 | 186,698,737 | 186,821,893 | 3 | 0 | 3 | 1 |

|         |   |             |             |   |   |   |   |
|---------|---|-------------|-------------|---|---|---|---|
| Case 40 | 4 | 186,832,817 | 187,122,319 | 2 | 0 | 2 | 1 |
| Case 40 | 4 | 187,122,332 | 187,549,809 | 3 | 0 | 3 | 1 |
| Case 40 | 4 | 187,549,883 | 187,621,568 | 2 | 0 | 2 | 1 |
| Case 40 | 4 | 187,622,064 | 187,906,366 | 3 | 0 | 3 | 1 |
| Case 40 | 4 | 187,912,810 | 190,963,766 | 2 | 0 | 2 | 1 |
| Case 40 | 5 | 38,139      | 46,399,093  | 4 | 1 | 5 | 0 |
| Case 40 | 5 | 49,457,282  | 139,931,384 | 2 | 0 | 2 | 1 |
| Case 40 | 5 | 139,931,607 | 139,931,620 | 1 | 0 | 1 | 0 |
| Case 40 | 5 | 139,931,629 | 139,931,653 | 0 | 0 | 0 | 0 |
| Case 40 | 5 | 139,931,655 | 140,475,212 | 2 | 0 | 2 | 1 |
| Case 40 | 5 | 140,475,377 | 140,558,613 | 3 | 0 | 3 | 1 |
| Case 40 | 5 | 140,558,618 | 140,719,090 | 2 | 0 | 2 | 1 |
| Case 40 | 5 | 140,719,224 | 140,780,036 | 3 | 0 | 3 | 1 |
| Case 40 | 5 | 140,782,160 | 140,796,099 | 2 | 0 | 2 | 1 |
| Case 40 | 5 | 140,797,630 | 140,895,377 | 3 | 0 | 3 | 1 |
| Case 40 | 5 | 140,899,268 | 141,024,142 | 2 | 0 | 2 | 1 |
| Case 40 | 5 | 141,024,259 | 141,044,943 | 3 | 0 | 3 | 1 |
| Case 40 | 5 | 141,046,035 | 149,119,815 | 2 | 0 | 2 | 1 |
| Case 40 | 5 | 149,124,228 | 149,201,670 | 3 | 0 | 3 | 1 |
| Case 40 | 5 | 149,205,630 | 150,401,796 | 2 | 0 | 2 | 1 |
| Case 40 | 5 | 150,401,891 | 150,428,871 | 3 | 0 | 3 | 1 |
| Case 40 | 5 | 150,429,443 | 150,945,261 | 2 | 0 | 2 | 1 |
| Case 40 | 5 | 150,945,465 | 150,974,513 | 3 | 0 | 3 | 1 |
| Case 40 | 5 | 150,974,701 | 175,811,233 | 2 | 0 | 2 | 1 |
| Case 40 | 5 | 175,811,362 | 175,956,761 | 3 | 0 | 3 | 1 |
| Case 40 | 5 | 175,957,644 | 177,683,382 | 2 | 0 | 2 | 1 |
| Case 40 | 5 | 177,683,905 | 177,867,175 | 3 | 0 | 3 | 1 |
| Case 40 | 5 | 177,868,723 | 180,686,958 | 2 | 0 | 2 | 1 |
| Case 40 | 5 | 180,687,012 | 180,693,127 | 3 | 0 | 3 | 1 |
| Case 40 | 6 | 108,666     | 58,752,089  | 2 | 1 | 3 | 0 |
| Case 40 | 6 | 61,891,118  | 120,636,227 | 2 | 1 | 3 | 0 |
| Case 40 | 6 | 120,639,044 | 120,704,438 | 1 | 0 | 1 | 0 |
| Case 40 | 6 | 120,705,746 | 120,732,398 | 0 | 0 | 0 | 0 |
| Case 40 | 6 | 120,736,857 | 120,748,778 | 2 | 0 | 2 | 1 |
| Case 40 | 6 | 120,752,983 | 153,453,987 | 2 | 1 | 3 | 0 |
| Case 40 | 6 | 153,454,558 | 153,577,020 | 2 | 2 | 4 | 0 |
| Case 40 | 6 | 153,577,503 | 170,980,171 | 2 | 1 | 3 | 0 |
| Case 40 | 7 | 44,935      | 3,765,004   | 3 | 2 | 5 | 0 |
| Case 40 | 7 | 3,766,819   | 4,337,070   | 3 | 1 | 4 | 0 |
| Case 40 | 7 | 4,339,768   | 8,800,804   | 3 | 2 | 5 | 0 |
| Case 40 | 7 | 8,800,995   | 8,948,433   | 4 | 2 | 6 | 0 |
| Case 40 | 7 | 8,950,864   | 12,491,847  | 3 | 2 | 5 | 0 |
| Case 40 | 7 | 12,494,659  | 12,553,243  | 4 | 2 | 6 | 0 |
| Case 40 | 7 | 12,558,799  | 12,820,059  | 3 | 2 | 5 | 0 |
| Case 40 | 7 | 12,820,470  | 13,462,040  | 4 | 2 | 6 | 0 |
| Case 40 | 7 | 13,465,676  | 19,758,362  | 3 | 2 | 5 | 0 |
| Case 40 | 7 | 19,759,433  | 20,001,275  | 4 | 2 | 6 | 0 |
| Case 40 | 7 | 20,003,094  | 27,121,456  | 3 | 2 | 5 | 0 |
| Case 40 | 7 | 27,130,276  | 27,238,913  | 3 | 1 | 4 | 0 |
| Case 40 | 7 | 27,239,064  | 38,268,811  | 3 | 2 | 5 | 0 |
| Case 40 | 7 | 38,269,292  | 38,374,697  | 4 | 2 | 6 | 0 |
| Case 40 | 7 | 38,380,446  | 42,071,698  | 3 | 2 | 5 | 0 |
| Case 40 | 7 | 42,073,962  | 42,201,874  | 3 | 1 | 4 | 0 |
| Case 40 | 7 | 42,203,353  | 57,376,120  | 3 | 2 | 5 | 0 |
| Case 40 | 7 | 57,380,615  | 58,019,061  | 3 | 1 | 4 | 0 |
| Case 40 | 7 | 61,056,053  | 63,385,883  | 3 | 1 | 4 | 0 |
| Case 40 | 7 | 63,387,484  | 69,913,100  | 3 | 2 | 5 | 0 |
| Case 40 | 7 | 69,925,030  | 70,387,953  | 3 | 1 | 4 | 0 |
| Case 40 | 7 | 70,397,051  | 82,577,973  | 3 | 2 | 5 | 0 |
| Case 40 | 7 | 82,579,137  | 82,595,653  | 3 | 1 | 4 | 0 |
| Case 40 | 7 | 82,595,736  | 88,935,494  | 3 | 2 | 5 | 0 |

|         |   |             |             |   |   |   |   |
|---------|---|-------------|-------------|---|---|---|---|
| Case 40 | 7 | 88,945,484  | 89,195,515  | 3 | 1 | 4 | 0 |
| Case 40 | 7 | 89,198,032  | 99,474,143  | 3 | 2 | 5 | 0 |
| Case 40 | 7 | 99,474,158  | 100,349,764 | 3 | 1 | 4 | 0 |
| Case 40 | 7 | 100,349,778 | 100,466,350 | 3 | 2 | 5 | 0 |
| Case 40 | 7 | 100,466,441 | 100,777,039 | 3 | 1 | 4 | 0 |
| Case 40 | 7 | 100,778,864 | 100,817,901 | 3 | 2 | 5 | 0 |
| Case 40 | 7 | 100,818,057 | 100,881,640 | 3 | 1 | 4 | 0 |
| Case 40 | 7 | 100,883,176 | 118,119,143 | 3 | 2 | 5 | 0 |
| Case 40 | 7 | 118,119,263 | 118,701,195 | 4 | 2 | 6 | 0 |
| Case 40 | 7 | 118,742,974 | 127,143,881 | 3 | 2 | 5 | 0 |
| Case 40 | 7 | 127,145,723 | 127,731,618 | 3 | 1 | 4 | 0 |
| Case 40 | 7 | 127,733,822 | 131,186,424 | 3 | 2 | 5 | 0 |
| Case 40 | 7 | 131,189,107 | 131,491,505 | 3 | 1 | 4 | 0 |
| Case 40 | 7 | 131,491,623 | 140,020,787 | 3 | 2 | 5 | 0 |
| Case 40 | 7 | 140,024,052 | 140,394,599 | 3 | 1 | 4 | 0 |
| Case 40 | 7 | 140,396,561 | 141,176,928 | 3 | 2 | 5 | 0 |
| Case 40 | 7 | 141,194,823 | 141,673,473 | 3 | 1 | 4 | 0 |
| Case 40 | 7 | 141,673,483 | 142,536,951 | 3 | 2 | 5 | 0 |
| Case 40 | 7 | 142,545,218 | 143,196,926 | 3 | 1 | 4 | 0 |
| Case 40 | 7 | 143,199,169 | 151,859,569 | 3 | 2 | 5 | 0 |
| Case 40 | 7 | 151,859,578 | 151,882,672 | 3 | 1 | 4 | 0 |
| Case 40 | 7 | 151,884,449 | 159,119,486 | 3 | 2 | 5 | 0 |
| Case 40 | 8 | 164,984     | 212,894     | 3 | 0 | 3 | 1 |
| Case 40 | 8 | 217,587     | 3,582,873   | 2 | 2 | 4 | 0 |
| Case 40 | 8 | 3,583,503   | 3,783,471   | 2 | 1 | 3 | 0 |
| Case 40 | 8 | 3,784,833   | 3,906,162   | 2 | 2 | 4 | 0 |
| Case 40 | 8 | 3,906,703   | 4,002,653   | 2 | 1 | 3 | 0 |
| Case 40 | 8 | 4,005,375   | 4,723,047   | 2 | 2 | 4 | 0 |
| Case 40 | 8 | 4,728,668   | 4,927,142   | 2 | 1 | 3 | 0 |
| Case 40 | 8 | 4,928,491   | 5,581,833   | 2 | 2 | 4 | 0 |
| Case 40 | 8 | 5,587,923   | 5,607,214   | 2 | 1 | 3 | 0 |
| Case 40 | 8 | 5,607,663   | 10,464,755  | 2 | 2 | 4 | 0 |
| Case 40 | 8 | 10,465,063  | 10,467,333  | 2 | 1 | 3 | 0 |
| Case 40 | 8 | 10,467,335  | 13,961,133  | 2 | 2 | 4 | 0 |
| Case 40 | 8 | 13,963,152  | 14,282,382  | 2 | 1 | 3 | 0 |
| Case 40 | 8 | 14,282,776  | 15,347,239  | 2 | 2 | 4 | 0 |
| Case 40 | 8 | 15,347,819  | 15,928,415  | 2 | 1 | 3 | 0 |
| Case 40 | 8 | 15,928,918  | 32,579,109  | 2 | 2 | 4 | 0 |
| Case 40 | 8 | 32,584,095  | 32,947,353  | 2 | 1 | 3 | 0 |
| Case 40 | 8 | 32,954,243  | 36,530,894  | 2 | 2 | 4 | 0 |
| Case 40 | 8 | 36,544,439  | 37,901,179  | 3 | 2 | 5 | 0 |
| Case 40 | 8 | 37,902,453  | 43,791,691  | 2 | 2 | 4 | 0 |
| Case 40 | 8 | 46,886,735  | 146,293,414 | 2 | 2 | 4 | 0 |
| Case 40 | 9 | 46,587      | 248,030     | 1 | 0 | 1 | 0 |
| Case 40 | 9 | 248,749     | 484,745     | 2 | 0 | 2 | 1 |
| Case 40 | 9 | 484,786     | 678,088     | 1 | 0 | 1 | 0 |
| Case 40 | 9 | 678,837     | 841,866     | 2 | 0 | 2 | 1 |
| Case 40 | 9 | 842,090     | 917,667     | 1 | 0 | 1 | 0 |
| Case 40 | 9 | 923,342     | 1,056,887   | 2 | 0 | 2 | 1 |
| Case 40 | 9 | 1,056,959   | 1,100,738   | 1 | 0 | 1 | 0 |
| Case 40 | 9 | 1,102,058   | 1,209,190   | 2 | 0 | 2 | 1 |
| Case 40 | 9 | 1,209,265   | 1,283,014   | 1 | 0 | 1 | 0 |
| Case 40 | 9 | 1,285,567   | 1,342,763   | 2 | 0 | 2 | 1 |
| Case 40 | 9 | 1,346,388   | 1,404,008   | 1 | 0 | 1 | 0 |
| Case 40 | 9 | 1,404,690   | 1,444,746   | 2 | 0 | 2 | 1 |
| Case 40 | 9 | 1,446,149   | 1,666,693   | 1 | 0 | 1 | 0 |
| Case 40 | 9 | 1,667,544   | 1,845,946   | 2 | 0 | 2 | 1 |
| Case 40 | 9 | 1,849,664   | 2,115,271   | 1 | 0 | 1 | 0 |
| Case 40 | 9 | 2,116,037   | 2,196,734   | 2 | 0 | 2 | 1 |
| Case 40 | 9 | 2,196,932   | 2,227,896   | 1 | 0 | 1 | 0 |
| Case 40 | 9 | 2,228,689   | 2,340,310   | 2 | 0 | 2 | 1 |

|         |   |            |            |   |   |   |   |
|---------|---|------------|------------|---|---|---|---|
| Case 40 | 9 | 2,342,136  | 2,412,296  | 1 | 0 | 1 | 0 |
| Case 40 | 9 | 2,414,600  | 2,430,911  | 2 | 0 | 2 | 1 |
| Case 40 | 9 | 2,431,272  | 2,531,098  | 1 | 0 | 1 | 0 |
| Case 40 | 9 | 2,533,445  | 2,544,610  | 2 | 0 | 2 | 1 |
| Case 40 | 9 | 2,547,156  | 2,631,092  | 1 | 0 | 1 | 0 |
| Case 40 | 9 | 2,631,680  | 2,718,349  | 2 | 0 | 2 | 1 |
| Case 40 | 9 | 2,718,415  | 2,790,307  | 1 | 0 | 1 | 0 |
| Case 40 | 9 | 2,795,953  | 2,829,799  | 2 | 0 | 2 | 1 |
| Case 40 | 9 | 2,829,836  | 3,101,606  | 1 | 0 | 1 | 0 |
| Case 40 | 9 | 3,101,626  | 3,193,862  | 2 | 0 | 2 | 1 |
| Case 40 | 9 | 3,194,613  | 3,755,135  | 1 | 0 | 1 | 0 |
| Case 40 | 9 | 3,755,938  | 3,824,004  | 2 | 0 | 2 | 1 |
| Case 40 | 9 | 3,825,328  | 3,827,120  | 1 | 0 | 1 | 0 |
| Case 40 | 9 | 3,827,824  | 3,983,003  | 2 | 0 | 2 | 1 |
| Case 40 | 9 | 3,985,549  | 4,002,823  | 1 | 0 | 1 | 0 |
| Case 40 | 9 | 4,005,108  | 4,083,587  | 2 | 0 | 2 | 1 |
| Case 40 | 9 | 4,083,665  | 4,110,947  | 1 | 0 | 1 | 0 |
| Case 40 | 9 | 4,117,602  | 4,193,531  | 2 | 0 | 2 | 1 |
| Case 40 | 9 | 4,194,762  | 4,207,680  | 1 | 0 | 1 | 0 |
| Case 40 | 9 | 4,208,429  | 4,218,631  | 2 | 0 | 2 | 1 |
| Case 40 | 9 | 4,219,259  | 4,292,083  | 1 | 0 | 1 | 0 |
| Case 40 | 9 | 4,295,583  | 4,344,768  | 2 | 0 | 2 | 1 |
| Case 40 | 9 | 4,345,431  | 4,364,438  | 1 | 0 | 1 | 0 |
| Case 40 | 9 | 4,366,058  | 4,380,096  | 2 | 0 | 2 | 1 |
| Case 40 | 9 | 4,380,523  | 4,539,377  | 1 | 0 | 1 | 0 |
| Case 40 | 9 | 4,541,368  | 4,625,359  | 2 | 0 | 2 | 1 |
| Case 40 | 9 | 4,625,415  | 4,633,488  | 1 | 0 | 1 | 0 |
| Case 40 | 9 | 4,635,232  | 4,691,570  | 2 | 0 | 2 | 1 |
| Case 40 | 9 | 4,691,765  | 4,712,407  | 1 | 0 | 1 | 0 |
| Case 40 | 9 | 4,713,058  | 4,719,182  | 2 | 0 | 2 | 1 |
| Case 40 | 9 | 4,720,263  | 4,833,305  | 1 | 0 | 1 | 0 |
| Case 40 | 9 | 4,833,437  | 4,836,811  | 2 | 0 | 2 | 1 |
| Case 40 | 9 | 4,840,063  | 5,164,266  | 1 | 0 | 1 | 0 |
| Case 40 | 9 | 5,174,638  | 5,191,468  | 2 | 0 | 2 | 1 |
| Case 40 | 9 | 5,196,253  | 5,464,065  | 1 | 0 | 1 | 0 |
| Case 40 | 9 | 5,465,130  | 5,581,140  | 2 | 0 | 2 | 1 |
| Case 40 | 9 | 5,593,419  | 5,861,604  | 1 | 0 | 1 | 0 |
| Case 40 | 9 | 5,864,988  | 5,922,529  | 2 | 0 | 2 | 1 |
| Case 40 | 9 | 5,922,860  | 6,515,433  | 1 | 0 | 1 | 0 |
| Case 40 | 9 | 6,523,011  | 6,673,285  | 2 | 0 | 2 | 1 |
| Case 40 | 9 | 6,673,465  | 6,774,846  | 1 | 0 | 1 | 0 |
| Case 40 | 9 | 6,779,505  | 6,917,615  | 2 | 0 | 2 | 1 |
| Case 40 | 9 | 6,925,663  | 6,990,510  | 1 | 0 | 1 | 0 |
| Case 40 | 9 | 6,993,811  | 7,013,986  | 2 | 0 | 2 | 1 |
| Case 40 | 9 | 7,015,330  | 7,143,431  | 1 | 0 | 1 | 0 |
| Case 40 | 9 | 7,145,264  | 7,286,599  | 2 | 0 | 2 | 1 |
| Case 40 | 9 | 7,291,256  | 7,361,202  | 1 | 0 | 1 | 0 |
| Case 40 | 9 | 7,366,297  | 7,415,094  | 2 | 0 | 2 | 1 |
| Case 40 | 9 | 7,415,340  | 7,558,769  | 1 | 0 | 1 | 0 |
| Case 40 | 9 | 7,560,568  | 7,625,060  | 2 | 0 | 2 | 1 |
| Case 40 | 9 | 7,633,155  | 7,898,810  | 1 | 0 | 1 | 0 |
| Case 40 | 9 | 7,898,998  | 7,908,874  | 2 | 0 | 2 | 1 |
| Case 40 | 9 | 7,909,429  | 8,470,572  | 1 | 0 | 1 | 0 |
| Case 40 | 9 | 8,470,974  | 8,486,335  | 2 | 0 | 2 | 1 |
| Case 40 | 9 | 8,489,006  | 8,515,987  | 1 | 0 | 1 | 0 |
| Case 40 | 9 | 8,517,383  | 8,524,854  | 2 | 0 | 2 | 1 |
| Case 40 | 9 | 8,533,412  | 8,854,069  | 1 | 0 | 1 | 0 |
| Case 40 | 9 | 8,855,603  | 8,889,419  | 2 | 0 | 2 | 1 |
| Case 40 | 9 | 8,890,725  | 14,303,488 | 1 | 0 | 1 | 0 |
| Case 40 | 9 | 14,304,973 | 14,378,776 | 2 | 0 | 2 | 1 |
| Case 40 | 9 | 14,379,104 | 14,488,950 | 1 | 0 | 1 | 0 |

|         |   |             |             |   |   |   |   |
|---------|---|-------------|-------------|---|---|---|---|
| Case 40 | 9 | 14,491,347  | 14,519,301  | 2 | 0 | 2 | 1 |
| Case 40 | 9 | 14,520,560  | 14,769,803  | 1 | 0 | 1 | 0 |
| Case 40 | 9 | 14,770,658  | 14,776,178  | 2 | 0 | 2 | 1 |
| Case 40 | 9 | 14,782,497  | 14,802,948  | 1 | 0 | 1 | 0 |
| Case 40 | 9 | 14,804,141  | 14,823,283  | 2 | 0 | 2 | 1 |
| Case 40 | 9 | 14,824,799  | 14,833,003  | 1 | 0 | 1 | 0 |
| Case 40 | 9 | 14,833,488  | 14,835,081  | 0 | 0 | 0 | 0 |
| Case 40 | 9 | 14,838,860  | 14,851,703  | 2 | 0 | 2 | 1 |
| Case 40 | 9 | 14,851,841  | 15,243,411  | 1 | 0 | 1 | 0 |
| Case 40 | 9 | 15,246,652  | 15,301,428  | 2 | 0 | 2 | 1 |
| Case 40 | 9 | 15,304,782  | 16,125,443  | 1 | 0 | 1 | 0 |
| Case 40 | 9 | 16,127,905  | 16,161,233  | 2 | 0 | 2 | 1 |
| Case 40 | 9 | 16,162,546  | 16,201,392  | 1 | 0 | 1 | 0 |
| Case 40 | 9 | 16,201,612  | 16,480,296  | 2 | 0 | 2 | 1 |
| Case 40 | 9 | 16,482,083  | 16,783,380  | 1 | 0 | 1 | 0 |
| Case 40 | 9 | 16,783,482  | 16,797,461  | 2 | 0 | 2 | 1 |
| Case 40 | 9 | 16,799,569  | 16,955,901  | 1 | 0 | 1 | 0 |
| Case 40 | 9 | 16,958,312  | 17,012,980  | 2 | 0 | 2 | 1 |
| Case 40 | 9 | 17,014,026  | 17,622,213  | 1 | 0 | 1 | 0 |
| Case 40 | 9 | 17,622,897  | 17,735,707  | 2 | 0 | 2 | 1 |
| Case 40 | 9 | 17,735,905  | 18,395,376  | 1 | 0 | 1 | 0 |
| Case 40 | 9 | 18,401,585  | 18,444,138  | 2 | 0 | 2 | 1 |
| Case 40 | 9 | 18,446,300  | 18,601,564  | 1 | 0 | 1 | 0 |
| Case 40 | 9 | 18,602,403  | 18,657,647  | 2 | 0 | 2 | 1 |
| Case 40 | 9 | 18,659,794  | 18,721,580  | 1 | 0 | 1 | 0 |
| Case 40 | 9 | 18,721,584  | 18,817,594  | 2 | 0 | 2 | 1 |
| Case 40 | 9 | 18,818,890  | 18,892,552  | 1 | 0 | 1 | 0 |
| Case 40 | 9 | 18,894,714  | 18,986,580  | 2 | 0 | 2 | 1 |
| Case 40 | 9 | 18,989,696  | 19,056,398  | 1 | 0 | 1 | 0 |
| Case 40 | 9 | 19,057,965  | 19,126,307  | 2 | 0 | 2 | 1 |
| Case 40 | 9 | 19,126,476  | 19,419,528  | 1 | 0 | 1 | 0 |
| Case 40 | 9 | 19,420,040  | 19,788,166  | 2 | 0 | 2 | 1 |
| Case 40 | 9 | 19,790,795  | 19,939,469  | 1 | 0 | 1 | 0 |
| Case 40 | 9 | 19,942,311  | 20,000,600  | 2 | 0 | 2 | 1 |
| Case 40 | 9 | 20,001,782  | 20,287,282  | 1 | 0 | 1 | 0 |
| Case 40 | 9 | 20,287,612  | 20,379,884  | 2 | 0 | 2 | 1 |
| Case 40 | 9 | 20,391,116  | 21,974,640  | 1 | 0 | 1 | 0 |
| Case 40 | 9 | 21,974,720  | 22,130,065  | 0 | 0 | 0 | 0 |
| Case 40 | 9 | 22,132,076  | 26,515,052  | 2 | 0 | 2 | 1 |
| Case 40 | 9 | 26,515,617  | 26,651,364  | 3 | 0 | 3 | 1 |
| Case 40 | 9 | 26,652,538  | 27,185,613  | 2 | 0 | 2 | 1 |
| Case 40 | 9 | 27,185,762  | 27,230,152  | 3 | 0 | 3 | 1 |
| Case 40 | 9 | 27,230,196  | 32,372,462  | 2 | 0 | 2 | 1 |
| Case 40 | 9 | 32,374,666  | 32,453,278  | 3 | 0 | 3 | 1 |
| Case 40 | 9 | 32,455,262  | 32,619,211  | 2 | 0 | 2 | 1 |
| Case 40 | 9 | 32,625,622  | 37,046,091  | 3 | 0 | 3 | 1 |
| Case 40 | 9 | 37,055,109  | 37,258,237  | 2 | 0 | 2 | 1 |
| Case 40 | 9 | 37,258,316  | 38,699,239  | 3 | 0 | 3 | 1 |
| Case 40 | 9 | 38,699,876  | 43,314,125  | 2 | 0 | 2 | 1 |
| Case 40 | 9 | 43,504,854  | 46,944,322  | 2 | 1 | 3 | 0 |
| Case 40 | 9 | 65,629,772  | 68,838,523  | 2 | 1 | 3 | 0 |
| Case 40 | 9 | 69,108,060  | 79,829,278  | 3 | 0 | 3 | 1 |
| Case 40 | 9 | 79,835,101  | 80,010,025  | 2 | 0 | 2 | 1 |
| Case 40 | 9 | 80,014,376  | 83,284,737  | 3 | 0 | 3 | 1 |
| Case 40 | 9 | 83,290,499  | 83,441,767  | 2 | 0 | 2 | 1 |
| Case 40 | 9 | 83,445,616  | 99,521,119  | 3 | 0 | 3 | 1 |
| Case 40 | 9 | 99,521,123  | 99,589,296  | 2 | 0 | 2 | 1 |
| Case 40 | 9 | 99,605,174  | 100,308,517 | 2 | 1 | 3 | 0 |
| Case 40 | 9 | 100,310,534 | 100,962,566 | 3 | 1 | 4 | 0 |
| Case 40 | 9 | 100,963,653 | 100,975,481 | 2 | 2 | 4 | 0 |
| Case 40 | 9 | 100,975,694 | 114,161,657 | 2 | 1 | 3 | 0 |

|         |    |             |             |   |   |   |   |
|---------|----|-------------|-------------|---|---|---|---|
| Case 40 | 9  | 114,172,355 | 117,086,271 | 3 | 1 | 4 | 0 |
| Case 40 | 9  | 117,086,356 | 117,093,142 | 2 | 2 | 4 | 0 |
| Case 40 | 9  | 117,093,856 | 141,066,491 | 2 | 1 | 3 | 0 |
| Case 40 | 10 | 98,087      | 28,624,136  | 4 | 0 | 4 | 1 |
| Case 40 | 10 | 28,632,464  | 31,289,921  | 7 | 0 | 7 | 1 |
| Case 40 | 10 | 31,294,981  | 38,404,175  | 4 | 0 | 4 | 1 |
| Case 40 | 10 | 38,404,188  | 39,070,516  | 3 | 0 | 3 | 1 |
| Case 40 | 10 | 39,088,829  | 39,097,912  | 2 | 0 | 2 | 1 |
| Case 40 | 10 | 42,436,301  | 43,607,555  | 2 | 0 | 2 | 1 |
| Case 40 | 10 | 43,609,122  | 43,882,723  | 3 | 0 | 3 | 1 |
| Case 40 | 10 | 43,883,034  | 44,448,664  | 2 | 0 | 2 | 1 |
| Case 40 | 10 | 44,448,756  | 45,012,043  | 3 | 0 | 3 | 1 |
| Case 40 | 10 | 45,012,946  | 45,407,004  | 2 | 0 | 2 | 1 |
| Case 40 | 10 | 45,407,333  | 45,476,295  | 3 | 0 | 3 | 1 |
| Case 40 | 10 | 45,478,015  | 46,999,958  | 2 | 0 | 2 | 1 |
| Case 40 | 10 | 47,000,019  | 49,400,746  | 3 | 0 | 3 | 1 |
| Case 40 | 10 | 49,403,906  | 49,724,773  | 2 | 0 | 2 | 1 |
| Case 40 | 10 | 49,730,920  | 50,178,250  | 3 | 0 | 3 | 1 |
| Case 40 | 10 | 50,181,364  | 50,355,418  | 2 | 0 | 2 | 1 |
| Case 40 | 10 | 50,357,938  | 50,634,956  | 3 | 0 | 3 | 1 |
| Case 40 | 10 | 50,635,226  | 50,757,504  | 2 | 0 | 2 | 1 |
| Case 40 | 10 | 50,762,747  | 50,879,878  | 3 | 0 | 3 | 1 |
| Case 40 | 10 | 50,887,500  | 50,914,272  | 2 | 0 | 2 | 1 |
| Case 40 | 10 | 50,916,484  | 50,968,795  | 3 | 0 | 3 | 1 |
| Case 40 | 10 | 50,981,186  | 61,939,519  | 2 | 0 | 2 | 1 |
| Case 40 | 10 | 61,940,899  | 62,235,173  | 3 | 0 | 3 | 1 |
| Case 40 | 10 | 62,235,443  | 62,616,883  | 2 | 0 | 2 | 1 |
| Case 40 | 10 | 62,618,398  | 62,690,415  | 3 | 0 | 3 | 1 |
| Case 40 | 10 | 62,697,642  | 64,124,637  | 2 | 0 | 2 | 1 |
| Case 40 | 10 | 64,128,133  | 64,833,459  | 3 | 0 | 3 | 1 |
| Case 40 | 10 | 64,835,310  | 65,562,475  | 2 | 0 | 2 | 1 |
| Case 40 | 10 | 65,563,206  | 65,791,943  | 3 | 0 | 3 | 1 |
| Case 40 | 10 | 65,794,344  | 70,551,048  | 2 | 0 | 2 | 1 |
| Case 40 | 10 | 70,571,101  | 72,292,441  | 3 | 0 | 3 | 1 |
| Case 40 | 10 | 72,293,702  | 72,326,344  | 2 | 0 | 2 | 1 |
| Case 40 | 10 | 72,326,361  | 72,360,130  | 3 | 0 | 3 | 1 |
| Case 40 | 10 | 72,360,214  | 72,396,646  | 2 | 0 | 2 | 1 |
| Case 40 | 10 | 72,399,179  | 72,489,879  | 3 | 0 | 3 | 1 |
| Case 40 | 10 | 72,489,891  | 72,524,341  | 2 | 0 | 2 | 1 |
| Case 40 | 10 | 72,524,508  | 74,004,742  | 3 | 0 | 3 | 1 |
| Case 40 | 10 | 74,010,785  | 74,040,034  | 2 | 0 | 2 | 1 |
| Case 40 | 10 | 74,043,803  | 74,235,033  | 3 | 0 | 3 | 1 |
| Case 40 | 10 | 74,238,454  | 74,990,272  | 2 | 0 | 2 | 1 |
| Case 40 | 10 | 74,992,758  | 75,708,906  | 3 | 0 | 3 | 1 |
| Case 40 | 10 | 75,727,098  | 76,788,267  | 2 | 0 | 2 | 1 |
| Case 40 | 10 | 76,788,345  | 76,857,470  | 3 | 0 | 3 | 1 |
| Case 40 | 10 | 76,857,504  | 77,698,806  | 2 | 0 | 2 | 1 |
| Case 40 | 10 | 77,700,235  | 78,199,638  | 3 | 0 | 3 | 1 |
| Case 40 | 10 | 78,204,760  | 78,645,453  | 2 | 0 | 2 | 1 |
| Case 40 | 10 | 78,646,536  | 79,764,621  | 3 | 0 | 3 | 1 |
| Case 40 | 10 | 79,767,484  | 79,929,802  | 2 | 0 | 2 | 1 |
| Case 40 | 10 | 79,931,975  | 81,739,920  | 3 | 0 | 3 | 1 |
| Case 40 | 10 | 81,748,708  | 81,895,970  | 2 | 0 | 2 | 1 |
| Case 40 | 10 | 81,900,893  | 82,054,873  | 3 | 0 | 3 | 1 |
| Case 40 | 10 | 82,057,988  | 82,165,427  | 2 | 0 | 2 | 1 |
| Case 40 | 10 | 82,174,761  | 82,479,714  | 3 | 0 | 3 | 1 |
| Case 40 | 10 | 82,480,172  | 85,944,516  | 2 | 0 | 2 | 1 |
| Case 40 | 10 | 85,950,406  | 85,970,853  | 3 | 0 | 3 | 1 |
| Case 40 | 10 | 85,970,910  | 86,276,956  | 2 | 0 | 2 | 1 |
| Case 40 | 10 | 86,281,044  | 86,368,463  | 3 | 0 | 3 | 1 |
| Case 40 | 10 | 86,369,436  | 87,316,082  | 2 | 0 | 2 | 1 |

|         |    |             |             |   |   |   |   |
|---------|----|-------------|-------------|---|---|---|---|
| Case 40 | 10 | 87,320,674  | 88,200,383  | 3 | 0 | 3 | 1 |
| Case 40 | 10 | 88,202,298  | 88,422,116  | 2 | 0 | 2 | 1 |
| Case 40 | 10 | 88,422,151  | 88,446,830  | 3 | 0 | 3 | 1 |
| Case 40 | 10 | 88,449,377  | 89,335,977  | 2 | 0 | 2 | 1 |
| Case 40 | 10 | 89,336,834  | 89,457,851  | 3 | 0 | 3 | 1 |
| Case 40 | 10 | 89,459,858  | 89,786,353  | 2 | 0 | 2 | 1 |
| Case 40 | 10 | 89,787,367  | 90,034,737  | 3 | 0 | 3 | 1 |
| Case 40 | 10 | 90,038,033  | 91,065,949  | 2 | 0 | 2 | 1 |
| Case 40 | 10 | 91,066,038  | 91,315,670  | 3 | 0 | 3 | 1 |
| Case 40 | 10 | 91,315,684  | 93,973,279  | 2 | 0 | 2 | 1 |
| Case 40 | 10 | 93,977,203  | 94,267,880  | 3 | 0 | 3 | 1 |
| Case 40 | 10 | 94,267,953  | 94,460,650  | 2 | 0 | 2 | 1 |
| Case 40 | 10 | 94,461,344  | 94,621,540  | 3 | 0 | 3 | 1 |
| Case 40 | 10 | 94,622,028  | 94,822,350  | 2 | 0 | 2 | 1 |
| Case 40 | 10 | 94,822,580  | 95,169,364  | 3 | 0 | 3 | 1 |
| Case 40 | 10 | 95,170,675  | 96,795,524  | 2 | 0 | 2 | 1 |
| Case 40 | 10 | 96,796,861  | 96,804,451  | 3 | 0 | 3 | 1 |
| Case 40 | 10 | 96,804,676  | 96,987,103  | 2 | 0 | 2 | 1 |
| Case 40 | 10 | 96,988,377  | 97,257,034  | 3 | 0 | 3 | 1 |
| Case 40 | 10 | 97,260,248  | 97,983,635  | 2 | 0 | 2 | 1 |
| Case 40 | 10 | 97,987,252  | 99,285,132  | 3 | 0 | 3 | 1 |
| Case 40 | 10 | 99,286,003  | 99,338,131  | 2 | 0 | 2 | 1 |
| Case 40 | 10 | 99,338,262  | 99,890,470  | 3 | 0 | 3 | 1 |
| Case 40 | 10 | 99,891,010  | 100,037,683 | 2 | 0 | 2 | 1 |
| Case 40 | 10 | 100,044,136 | 100,247,590 | 3 | 0 | 3 | 1 |
| Case 40 | 10 | 100,249,295 | 101,090,246 | 2 | 0 | 2 | 1 |
| Case 40 | 10 | 101,090,322 | 101,716,711 | 3 | 0 | 3 | 1 |
| Case 40 | 10 | 101,716,897 | 102,000,701 | 2 | 0 | 2 | 1 |
| Case 40 | 10 | 102,003,456 | 102,648,765 | 3 | 0 | 3 | 1 |
| Case 40 | 10 | 102,653,765 | 102,709,849 | 2 | 0 | 2 | 1 |
| Case 40 | 10 | 102,715,183 | 102,762,544 | 3 | 0 | 3 | 1 |
| Case 40 | 10 | 102,762,581 | 102,780,638 | 2 | 0 | 2 | 1 |
| Case 40 | 10 | 102,782,087 | 104,638,723 | 3 | 0 | 3 | 1 |
| Case 40 | 10 | 104,640,955 | 105,138,047 | 2 | 0 | 2 | 1 |
| Case 40 | 10 | 105,138,961 | 105,586,509 | 3 | 0 | 3 | 1 |
| Case 40 | 10 | 105,590,558 | 105,788,905 | 2 | 0 | 2 | 1 |
| Case 40 | 10 | 105,791,355 | 105,882,253 | 3 | 0 | 3 | 1 |
| Case 40 | 10 | 105,882,765 | 106,075,500 | 2 | 0 | 2 | 1 |
| Case 40 | 10 | 106,075,592 | 107,021,332 | 3 | 0 | 3 | 1 |
| Case 40 | 10 | 107,022,160 | 111,421,513 | 2 | 0 | 2 | 1 |
| Case 40 | 10 | 111,424,646 | 111,667,535 | 3 | 0 | 3 | 1 |
| Case 40 | 10 | 111,669,239 | 112,056,098 | 2 | 0 | 2 | 1 |
| Case 40 | 10 | 112,067,334 | 112,208,231 | 3 | 0 | 3 | 1 |
| Case 40 | 10 | 112,208,500 | 112,388,002 | 2 | 0 | 2 | 1 |
| Case 40 | 10 | 112,389,466 | 112,623,274 | 3 | 0 | 3 | 1 |
| Case 40 | 10 | 112,633,918 | 113,516,494 | 2 | 0 | 2 | 1 |
| Case 40 | 10 | 113,516,620 | 114,207,480 | 3 | 0 | 3 | 1 |
| Case 40 | 10 | 114,209,703 | 114,435,232 | 2 | 0 | 2 | 1 |
| Case 40 | 10 | 114,436,559 | 114,711,983 | 3 | 0 | 3 | 1 |
| Case 40 | 10 | 114,723,650 | 114,849,353 | 2 | 0 | 2 | 1 |
| Case 40 | 10 | 114,849,399 | 115,559,445 | 3 | 0 | 3 | 1 |
| Case 40 | 10 | 115,561,171 | 115,685,187 | 2 | 0 | 2 | 1 |
| Case 40 | 10 | 115,694,632 | 115,884,927 | 3 | 0 | 3 | 1 |
| Case 40 | 10 | 115,885,779 | 116,000,453 | 2 | 0 | 2 | 1 |
| Case 40 | 10 | 116,003,053 | 116,582,560 | 3 | 0 | 3 | 1 |
| Case 40 | 10 | 116,588,737 | 118,357,676 | 2 | 0 | 2 | 1 |
| Case 40 | 10 | 118,357,677 | 118,637,809 | 3 | 0 | 3 | 1 |
| Case 40 | 10 | 118,639,142 | 118,968,222 | 2 | 0 | 2 | 1 |
| Case 40 | 10 | 118,969,028 | 119,044,800 | 3 | 0 | 3 | 1 |
| Case 40 | 10 | 119,044,940 | 119,237,988 | 2 | 0 | 2 | 1 |
| Case 40 | 10 | 119,243,566 | 119,691,399 | 3 | 0 | 3 | 1 |

|         |    |             |             |   |   |   |   |
|---------|----|-------------|-------------|---|---|---|---|
| Case 40 | 10 | 119,692,335 | 120,204,872 | 2 | 0 | 2 | 1 |
| Case 40 | 10 | 120,206,869 | 120,363,944 | 3 | 0 | 3 | 1 |
| Case 40 | 10 | 120,366,163 | 120,566,921 | 2 | 0 | 2 | 1 |
| Case 40 | 10 | 120,571,732 | 121,586,964 | 3 | 0 | 3 | 1 |
| Case 40 | 10 | 121,586,968 | 121,662,392 | 2 | 0 | 2 | 1 |
| Case 40 | 10 | 121,662,413 | 122,601,003 | 3 | 0 | 3 | 1 |
| Case 40 | 10 | 122,604,051 | 122,834,737 | 2 | 0 | 2 | 1 |
| Case 40 | 10 | 122,848,522 | 123,488,067 | 3 | 0 | 3 | 1 |
| Case 40 | 10 | 123,490,869 | 123,770,094 | 2 | 0 | 2 | 1 |
| Case 40 | 10 | 123,772,907 | 124,640,763 | 3 | 0 | 3 | 1 |
| Case 40 | 10 | 124,645,141 | 125,220,256 | 2 | 0 | 2 | 1 |
| Case 40 | 10 | 125,221,123 | 125,256,216 | 3 | 0 | 3 | 1 |
| Case 40 | 10 | 125,257,608 | 125,294,649 | 2 | 0 | 2 | 1 |
| Case 40 | 10 | 125,294,814 | 126,383,857 | 3 | 0 | 3 | 1 |
| Case 40 | 10 | 126,393,823 | 126,719,704 | 2 | 0 | 2 | 1 |
| Case 40 | 10 | 126,721,702 | 127,452,054 | 3 | 0 | 3 | 1 |
| Case 40 | 10 | 127,453,199 | 127,569,348 | 2 | 0 | 2 | 1 |
| Case 40 | 10 | 127,626,702 | 128,030,262 | 3 | 0 | 3 | 1 |
| Case 40 | 10 | 128,039,386 | 128,089,672 | 2 | 0 | 2 | 1 |
| Case 40 | 10 | 128,094,493 | 129,307,068 | 3 | 0 | 3 | 1 |
| Case 40 | 10 | 129,309,600 | 129,478,197 | 2 | 0 | 2 | 1 |
| Case 40 | 10 | 129,479,279 | 129,653,425 | 3 | 0 | 3 | 1 |
| Case 40 | 10 | 129,654,224 | 129,768,280 | 2 | 0 | 2 | 1 |
| Case 40 | 10 | 129,769,546 | 130,957,528 | 3 | 0 | 3 | 1 |
| Case 40 | 10 | 130,957,661 | 131,200,443 | 2 | 0 | 2 | 1 |
| Case 40 | 10 | 131,203,176 | 131,830,640 | 3 | 0 | 3 | 1 |
| Case 40 | 10 | 131,830,899 | 131,922,572 | 2 | 0 | 2 | 1 |
| Case 40 | 10 | 131,923,726 | 132,604,292 | 3 | 0 | 3 | 1 |
| Case 40 | 10 | 132,605,497 | 132,803,392 | 2 | 0 | 2 | 1 |
| Case 40 | 10 | 132,811,254 | 134,650,334 | 3 | 0 | 3 | 1 |
| Case 40 | 10 | 134,650,410 | 135,155,292 | 2 | 0 | 2 | 1 |
| Case 40 | 10 | 135,157,955 | 135,353,079 | 3 | 0 | 3 | 1 |
| Case 40 | 10 | 135,353,499 | 135,477,883 | 2 | 0 | 2 | 1 |
| Case 40 | 11 | 193,146     | 50,071,081  | 2 | 1 | 3 | 0 |
| Case 40 | 11 | 50,095,560  | 50,199,280  | 1 | 0 | 1 | 0 |
| Case 40 | 11 | 50,217,658  | 50,296,502  | 2 | 0 | 2 | 1 |
| Case 40 | 11 | 50,325,741  | 50,349,310  | 1 | 0 | 1 | 0 |
| Case 40 | 11 | 50,367,359  | 50,368,121  | 2 | 0 | 2 | 1 |
| Case 40 | 11 | 50,369,683  | 51,591,253  | 2 | 1 | 3 | 0 |
| Case 40 | 11 | 54,794,237  | 97,816,967  | 2 | 1 | 3 | 0 |
| Case 40 | 11 | 97,818,476  | 97,871,998  | 1 | 0 | 1 | 0 |
| Case 40 | 11 | 97,874,919  | 97,874,919  | 2 | 0 | 2 | 1 |
| Case 40 | 11 | 97,879,598  | 134,934,063 | 2 | 1 | 3 | 0 |
| Case 40 | 12 | 191,619     | 19,987,369  | 2 | 1 | 3 | 0 |
| Case 40 | 12 | 19,990,847  | 20,098,878  | 4 | 1 | 5 | 0 |
| Case 40 | 12 | 20,100,993  | 20,102,148  | 2 | 0 | 2 | 1 |
| Case 40 | 12 | 20,104,759  | 34,853,011  | 2 | 1 | 3 | 0 |
| Case 40 | 12 | 37,876,400  | 131,797,608 | 2 | 1 | 3 | 0 |
| Case 40 | 12 | 131,800,059 | 131,824,796 | 1 | 0 | 1 | 0 |
| Case 40 | 12 | 131,825,125 | 131,825,125 | 2 | 0 | 2 | 1 |
| Case 40 | 12 | 131,830,332 | 133,810,935 | 2 | 1 | 3 | 0 |
| Case 40 | 13 | 19,058,717  | 32,907,129  | 3 | 2 | 5 | 0 |
| Case 40 | 13 | 32,907,277  | 32,914,623  | 4 | 2 | 6 | 0 |
| Case 40 | 13 | 32,914,712  | 115,103,529 | 3 | 2 | 5 | 0 |
| Case 40 | 14 | 19,280,733  | 20,404,076  | 3 | 0 | 3 | 1 |
| Case 40 | 14 | 20,404,090  | 20,416,499  | 2 | 2 | 4 | 0 |
| Case 40 | 14 | 20,420,338  | 20,444,162  | 2 | 1 | 3 | 0 |
| Case 40 | 14 | 20,444,182  | 20,502,044  | 2 | 0 | 2 | 1 |
| Case 40 | 14 | 20,502,070  | 20,529,131  | 3 | 0 | 3 | 1 |
| Case 40 | 14 | 20,533,972  | 20,691,881  | 2 | 0 | 2 | 1 |
| Case 40 | 14 | 20,691,888  | 20,698,504  | 3 | 0 | 3 | 1 |



|         |    |            |             |   |   |   |   |
|---------|----|------------|-------------|---|---|---|---|
| Case 40 | 14 | 20,708,308 | 20,822,308  | 2 | 0 | 2 | 1 |
| Case 40 | 14 | 20,823,033 | 20,992,497  | 3 | 0 | 3 | 1 |
| Case 40 | 14 | 20,992,887 | 21,068,103  | 2 | 0 | 2 | 1 |
| Case 40 | 14 | 21,069,321 | 21,795,940  | 3 | 0 | 3 | 1 |
| Case 40 | 14 | 21,795,949 | 22,037,905  | 2 | 0 | 2 | 1 |
| Case 40 | 14 | 22,038,001 | 23,416,651  | 3 | 0 | 3 | 1 |
| Case 40 | 14 | 23,416,865 | 23,502,746  | 2 | 0 | 2 | 1 |
| Case 40 | 14 | 23,504,021 | 24,140,597  | 3 | 0 | 3 | 1 |
| Case 40 | 14 | 24,142,500 | 24,289,810  | 2 | 0 | 2 | 1 |
| Case 40 | 14 | 24,294,206 | 24,877,468  | 3 | 0 | 3 | 1 |
| Case 40 | 14 | 24,877,699 | 24,974,621  | 2 | 0 | 2 | 1 |
| Case 40 | 14 | 24,974,790 | 25,283,341  | 3 | 0 | 3 | 1 |
| Case 40 | 14 | 25,285,800 | 32,772,850  | 2 | 0 | 2 | 1 |
| Case 40 | 14 | 32,775,361 | 32,919,375  | 3 | 0 | 3 | 1 |
| Case 40 | 14 | 32,923,336 | 33,046,471  | 2 | 0 | 2 | 1 |
| Case 40 | 14 | 33,047,357 | 33,172,438  | 3 | 0 | 3 | 1 |
| Case 40 | 14 | 33,173,384 | 33,910,447  | 2 | 0 | 2 | 1 |
| Case 40 | 14 | 33,912,069 | 34,247,709  | 3 | 0 | 3 | 1 |
| Case 40 | 14 | 34,252,215 | 34,396,100  | 2 | 0 | 2 | 1 |
| Case 40 | 14 | 34,400,943 | 35,452,302  | 3 | 0 | 3 | 1 |
| Case 40 | 14 | 35,477,499 | 35,830,938  | 2 | 0 | 2 | 1 |
| Case 40 | 14 | 35,831,836 | 35,997,555  | 3 | 0 | 3 | 1 |
| Case 40 | 14 | 35,998,386 | 50,404,182  | 2 | 0 | 2 | 1 |
| Case 40 | 14 | 50,406,826 | 50,549,828  | 3 | 0 | 3 | 1 |
| Case 40 | 14 | 50,550,242 | 51,208,446  | 2 | 0 | 2 | 1 |
| Case 40 | 14 | 51,210,247 | 51,544,623  | 3 | 0 | 3 | 1 |
| Case 40 | 14 | 51,552,126 | 52,273,663  | 2 | 0 | 2 | 1 |
| Case 40 | 14 | 52,275,166 | 52,741,646  | 3 | 0 | 3 | 1 |
| Case 40 | 14 | 52,741,950 | 53,914,026  | 2 | 0 | 2 | 1 |
| Case 40 | 14 | 53,919,309 | 54,107,791  | 3 | 0 | 3 | 1 |
| Case 40 | 14 | 54,116,125 | 54,321,284  | 2 | 0 | 2 | 1 |
| Case 40 | 14 | 54,328,682 | 54,861,808  | 3 | 0 | 3 | 1 |
| Case 40 | 14 | 54,862,710 | 55,088,571  | 2 | 0 | 2 | 1 |
| Case 40 | 14 | 55,089,882 | 55,241,701  | 3 | 0 | 3 | 1 |
| Case 40 | 14 | 55,242,336 | 56,265,176  | 2 | 0 | 2 | 1 |
| Case 40 | 14 | 56,266,816 | 57,053,022  | 3 | 0 | 3 | 1 |
| Case 40 | 14 | 57,054,104 | 59,458,059  | 2 | 0 | 2 | 1 |
| Case 40 | 14 | 59,458,350 | 59,693,983  | 3 | 0 | 3 | 1 |
| Case 40 | 14 | 59,694,643 | 60,137,609  | 2 | 0 | 2 | 1 |
| Case 40 | 14 | 60,144,313 | 107,287,663 | 3 | 0 | 3 | 1 |
| Case 40 | 15 | 20,034,919 | 26,328,962  | 3 | 0 | 3 | 1 |
| Case 40 | 15 | 26,332,501 | 102,461,162 | 4 | 0 | 4 | 1 |
| Case 40 | 16 | 88,165     | 103,456     | 4 | 0 | 4 | 1 |
| Case 40 | 16 | 103,517    | 35,285,582  | 2 | 2 | 4 | 0 |
| Case 40 | 16 | 46,450,037 | 81,170,741  | 2 | 2 | 4 | 0 |
| Case 40 | 16 | 81,171,069 | 81,172,338  | 2 | 1 | 3 | 0 |
| Case 40 | 16 | 81,173,030 | 81,175,103  | 2 | 0 | 2 | 1 |
| Case 40 | 16 | 81,180,988 | 81,180,988  | 2 | 1 | 3 | 0 |
| Case 40 | 16 | 81,180,995 | 90,274,695  | 2 | 2 | 4 | 0 |
| Case 40 | 17 | 11,885     | 22,242,355  | 3 | 0 | 3 | 1 |
| Case 40 | 17 | 25,268,142 | 81,060,040  | 3 | 0 | 3 | 1 |
| Case 40 | 18 | 87,505     | 1,967,345   | 2 | 0 | 2 | 1 |
| Case 40 | 18 | 1,967,518  | 2,036,121   | 3 | 0 | 3 | 1 |
| Case 40 | 18 | 2,036,219  | 2,825,377   | 2 | 0 | 2 | 1 |
| Case 40 | 18 | 2,825,418  | 4,009,380   | 3 | 0 | 3 | 1 |
| Case 40 | 18 | 4,014,959  | 4,116,903   | 2 | 0 | 2 | 1 |
| Case 40 | 18 | 4,119,869  | 4,181,793   | 3 | 0 | 3 | 1 |
| Case 40 | 18 | 4,182,758  | 7,231,996   | 2 | 0 | 2 | 1 |
| Case 40 | 18 | 7,232,892  | 7,479,108   | 3 | 0 | 3 | 1 |
| Case 40 | 18 | 7,479,133  | 8,271,135   | 2 | 0 | 2 | 1 |
| Case 40 | 18 | 8,275,857  | 8,796,354   | 3 | 0 | 3 | 1 |

|         |    |            |            |   |   |   |   |
|---------|----|------------|------------|---|---|---|---|
| Case 40 | 18 | 8,797,022  | 8,802,775  | 2 | 0 | 2 | 1 |
| Case 40 | 18 | 8,803,251  | 8,835,330  | 3 | 0 | 3 | 1 |
| Case 40 | 18 | 8,835,869  | 9,526,634  | 2 | 0 | 2 | 1 |
| Case 40 | 18 | 9,527,100  | 9,871,870  | 3 | 0 | 3 | 1 |
| Case 40 | 18 | 9,871,956  | 9,984,478  | 2 | 0 | 2 | 1 |
| Case 40 | 18 | 9,986,354  | 10,567,782 | 3 | 0 | 3 | 1 |
| Case 40 | 18 | 10,572,323 | 10,699,142 | 2 | 0 | 2 | 1 |
| Case 40 | 18 | 10,700,973 | 10,842,934 | 3 | 0 | 3 | 1 |
| Case 40 | 18 | 10,843,058 | 10,997,117 | 2 | 0 | 2 | 1 |
| Case 40 | 18 | 10,997,640 | 11,228,713 | 3 | 0 | 3 | 1 |
| Case 40 | 18 | 11,232,515 | 11,752,943 | 2 | 0 | 2 | 1 |
| Case 40 | 18 | 11,759,432 | 12,449,725 | 3 | 0 | 3 | 1 |
| Case 40 | 18 | 12,454,384 | 13,217,574 | 2 | 0 | 2 | 1 |
| Case 40 | 18 | 13,219,641 | 13,681,876 | 3 | 0 | 3 | 1 |
| Case 40 | 18 | 13,681,901 | 13,803,024 | 2 | 0 | 2 | 1 |
| Case 40 | 18 | 13,803,519 | 13,891,602 | 3 | 0 | 3 | 1 |
| Case 40 | 18 | 13,907,526 | 15,249,516 | 2 | 0 | 2 | 1 |
| Case 40 | 18 | 15,330,525 | 15,375,878 | 2 | 1 | 3 | 0 |
| Case 40 | 18 | 18,520,354 | 66,744,288 | 2 | 1 | 3 | 0 |
| Case 40 | 18 | 66,744,308 | 66,744,308 | 1 | 0 | 1 | 0 |
| Case 40 | 18 | 66,747,568 | 66,755,508 | 0 | 0 | 0 | 0 |
| Case 40 | 18 | 66,758,232 | 66,758,232 | 2 | 0 | 2 | 1 |
| Case 40 | 18 | 66,758,828 | 78,015,180 | 2 | 1 | 3 | 0 |
| Case 40 | 19 | 260,912    | 430,690    | 3 | 0 | 3 | 1 |
| Case 40 | 19 | 434,847    | 582,927    | 2 | 0 | 2 | 1 |
| Case 40 | 19 | 583,268    | 683,221    | 3 | 0 | 3 | 1 |
| Case 40 | 19 | 683,719    | 757,968    | 2 | 0 | 2 | 1 |
| Case 40 | 19 | 757,971    | 1,046,520  | 3 | 0 | 3 | 1 |
| Case 40 | 19 | 1,047,016  | 1,056,431  | 2 | 0 | 2 | 1 |
| Case 40 | 19 | 1,056,563  | 2,241,327  | 3 | 0 | 3 | 1 |
| Case 40 | 19 | 2,242,829  | 2,290,977  | 2 | 0 | 2 | 1 |
| Case 40 | 19 | 2,294,279  | 2,936,535  | 3 | 0 | 3 | 1 |
| Case 40 | 19 | 2,936,559  | 2,994,946  | 2 | 0 | 2 | 1 |
| Case 40 | 19 | 2,994,967  | 4,488,757  | 3 | 0 | 3 | 1 |
| Case 40 | 19 | 4,491,603  | 4,510,850  | 2 | 0 | 2 | 1 |
| Case 40 | 19 | 4,510,874  | 7,528,734  | 3 | 0 | 3 | 1 |
| Case 40 | 19 | 7,528,817  | 7,573,287  | 2 | 0 | 2 | 1 |
| Case 40 | 19 | 7,574,918  | 8,106,521  | 3 | 0 | 3 | 1 |
| Case 40 | 19 | 8,111,982  | 8,167,643  | 2 | 0 | 2 | 1 |
| Case 40 | 19 | 8,167,685  | 8,486,884  | 3 | 0 | 3 | 1 |
| Case 40 | 19 | 8,486,953  | 8,509,905  | 2 | 0 | 2 | 1 |
| Case 40 | 19 | 8,509,965  | 8,842,187  | 3 | 0 | 3 | 1 |
| Case 40 | 19 | 8,905,057  | 8,966,475  | 2 | 0 | 2 | 1 |
| Case 40 | 19 | 8,966,588  | 9,297,079  | 3 | 0 | 3 | 1 |
| Case 40 | 19 | 9,297,196  | 9,929,038  | 2 | 0 | 2 | 1 |
| Case 40 | 19 | 9,932,831  | 11,727,503 | 3 | 0 | 3 | 1 |
| Case 40 | 19 | 11,727,763 | 12,719,846 | 2 | 0 | 2 | 1 |
| Case 40 | 19 | 12,721,401 | 13,888,905 | 3 | 0 | 3 | 1 |
| Case 40 | 19 | 13,888,986 | 14,130,215 | 2 | 0 | 2 | 1 |
| Case 40 | 19 | 14,134,498 | 15,276,739 | 3 | 0 | 3 | 1 |
| Case 40 | 19 | 15,276,755 | 15,740,067 | 2 | 0 | 2 | 1 |
| Case 40 | 19 | 15,740,354 | 17,211,568 | 3 | 0 | 3 | 1 |
| Case 40 | 19 | 17,212,570 | 17,394,737 | 2 | 0 | 2 | 1 |
| Case 40 | 19 | 17,394,770 | 17,922,777 | 3 | 0 | 3 | 1 |
| Case 40 | 19 | 17,922,795 | 17,937,710 | 2 | 0 | 2 | 1 |
| Case 40 | 19 | 17,937,786 | 19,643,028 | 3 | 0 | 3 | 1 |
| Case 40 | 19 | 19,643,487 | 19,655,969 | 2 | 0 | 2 | 1 |
| Case 40 | 19 | 19,657,143 | 19,770,513 | 3 | 0 | 3 | 1 |
| Case 40 | 19 | 19,770,591 | 24,629,285 | 2 | 0 | 2 | 1 |
| Case 40 | 19 | 27,732,159 | 29,350,969 | 2 | 0 | 2 | 1 |
| Case 40 | 19 | 29,352,099 | 30,007,635 | 3 | 0 | 3 | 1 |

|         |    |            |            |   |   |   |   |
|---------|----|------------|------------|---|---|---|---|
| Case 40 | 19 | 30,024,773 | 30,613,592 | 2 | 0 | 2 | 1 |
| Case 40 | 19 | 30,613,695 | 30,806,165 | 3 | 0 | 3 | 1 |
| Case 40 | 19 | 30,809,481 | 32,023,183 | 2 | 0 | 2 | 1 |
| Case 40 | 19 | 32,026,040 | 32,595,038 | 3 | 0 | 3 | 1 |
| Case 40 | 19 | 32,596,903 | 33,014,643 | 2 | 0 | 2 | 1 |
| Case 40 | 19 | 33,026,580 | 34,662,450 | 3 | 0 | 3 | 1 |
| Case 40 | 19 | 34,663,851 | 35,078,135 | 2 | 0 | 2 | 1 |
| Case 40 | 19 | 35,079,781 | 36,265,508 | 3 | 0 | 3 | 1 |
| Case 40 | 19 | 36,268,471 | 36,315,399 | 2 | 0 | 2 | 1 |
| Case 40 | 19 | 36,317,455 | 36,822,594 | 3 | 0 | 3 | 1 |
| Case 40 | 19 | 36,825,458 | 38,378,539 | 2 | 0 | 2 | 1 |
| Case 40 | 19 | 38,378,669 | 38,877,168 | 3 | 0 | 3 | 1 |
| Case 40 | 19 | 38,877,754 | 38,933,120 | 2 | 0 | 2 | 1 |
| Case 40 | 19 | 38,934,807 | 39,888,449 | 3 | 0 | 3 | 1 |
| Case 40 | 19 | 39,889,691 | 39,905,650 | 2 | 0 | 2 | 1 |
| Case 40 | 19 | 39,905,662 | 40,363,926 | 3 | 0 | 3 | 1 |
| Case 40 | 19 | 40,364,169 | 40,877,284 | 2 | 0 | 2 | 1 |
| Case 40 | 19 | 40,877,595 | 41,114,407 | 3 | 0 | 3 | 1 |
| Case 40 | 19 | 41,117,072 | 41,223,435 | 2 | 0 | 2 | 1 |
| Case 40 | 19 | 41,223,467 | 43,285,368 | 3 | 0 | 3 | 1 |
| Case 40 | 19 | 43,328,006 | 43,519,442 | 2 | 2 | 4 | 0 |
| Case 40 | 19 | 43,523,068 | 43,537,378 | 4 | 0 | 4 | 1 |
| Case 40 | 19 | 43,539,189 | 44,301,400 | 3 | 0 | 3 | 1 |
| Case 40 | 19 | 44,301,425 | 44,501,145 | 2 | 0 | 2 | 1 |
| Case 40 | 19 | 44,501,243 | 44,646,572 | 3 | 0 | 3 | 1 |
| Case 40 | 19 | 44,652,748 | 44,983,604 | 2 | 0 | 2 | 1 |
| Case 40 | 19 | 44,986,702 | 45,636,201 | 3 | 0 | 3 | 1 |
| Case 40 | 19 | 45,639,988 | 45,852,126 | 2 | 0 | 2 | 1 |
| Case 40 | 19 | 45,852,133 | 46,206,261 | 3 | 0 | 3 | 1 |
| Case 40 | 19 | 46,206,425 | 46,280,799 | 2 | 0 | 2 | 1 |
| Case 40 | 19 | 46,280,838 | 46,984,209 | 3 | 0 | 3 | 1 |
| Case 40 | 19 | 46,993,486 | 47,133,937 | 2 | 0 | 2 | 1 |
| Case 40 | 19 | 47,136,394 | 49,114,383 | 3 | 0 | 3 | 1 |
| Case 40 | 19 | 49,116,134 | 49,174,170 | 2 | 0 | 2 | 1 |
| Case 40 | 19 | 49,183,284 | 49,183,284 | 1 | 0 | 1 | 0 |
| Case 40 | 19 | 49,184,380 | 49,206,462 | 0 | 0 | 0 | 0 |
| Case 40 | 19 | 49,206,631 | 49,224,120 | 2 | 0 | 2 | 1 |
| Case 40 | 19 | 49,224,141 | 49,963,010 | 3 | 0 | 3 | 1 |
| Case 40 | 19 | 49,963,015 | 49,977,218 | 2 | 0 | 2 | 1 |
| Case 40 | 19 | 49,977,929 | 50,492,564 | 3 | 0 | 3 | 1 |
| Case 40 | 19 | 50,492,971 | 50,548,191 | 2 | 0 | 2 | 1 |
| Case 40 | 19 | 50,548,367 | 52,386,723 | 3 | 0 | 3 | 1 |
| Case 40 | 19 | 52,388,229 | 53,968,383 | 2 | 0 | 2 | 1 |
| Case 40 | 19 | 53,970,581 | 54,206,688 | 3 | 0 | 3 | 1 |
| Case 40 | 19 | 54,207,589 | 54,314,097 | 2 | 0 | 2 | 1 |
| Case 40 | 19 | 54,314,134 | 54,652,203 | 3 | 0 | 3 | 1 |
| Case 40 | 19 | 54,652,265 | 54,696,167 | 2 | 0 | 2 | 1 |
| Case 40 | 19 | 54,697,079 | 55,871,205 | 3 | 0 | 3 | 1 |
| Case 40 | 19 | 55,871,302 | 55,877,111 | 2 | 0 | 2 | 1 |
| Case 40 | 19 | 55,877,255 | 56,735,119 | 3 | 0 | 3 | 1 |
| Case 40 | 19 | 56,735,153 | 57,132,734 | 2 | 0 | 2 | 1 |
| Case 40 | 19 | 57,132,879 | 57,723,892 | 3 | 0 | 3 | 1 |
| Case 40 | 19 | 57,724,081 | 58,050,063 | 2 | 0 | 2 | 1 |
| Case 40 | 19 | 58,058,246 | 58,099,976 | 3 | 0 | 3 | 1 |
| Case 40 | 19 | 58,101,389 | 58,684,611 | 2 | 0 | 2 | 1 |
| Case 40 | 19 | 58,689,834 | 58,761,107 | 3 | 0 | 3 | 1 |
| Case 40 | 19 | 58,766,874 | 58,797,098 | 2 | 0 | 2 | 1 |
| Case 40 | 19 | 58,799,781 | 58,846,306 | 3 | 0 | 3 | 1 |
| Case 40 | 19 | 58,846,338 | 59,097,160 | 2 | 0 | 2 | 1 |
| Case 40 | 20 | 63,244     | 26,293,985 | 4 | 0 | 4 | 1 |
| Case 40 | 20 | 29,425,357 | 62,948,788 | 4 | 0 | 4 | 1 |

|         |    |             |             |   |   |   |   |
|---------|----|-------------|-------------|---|---|---|---|
| Case 40 | 21 | 10,827,533  | 10,971,337  | 2 | 1 | 3 | 0 |
| Case 40 | 21 | 14,368,320  | 14,368,320  | 2 | 1 | 3 | 0 |
| Case 40 | 21 | 14,613,203  | 14,998,515  | 1 | 0 | 1 | 0 |
| Case 40 | 21 | 15,011,015  | 15,449,004  | 2 | 0 | 2 | 1 |
| Case 40 | 21 | 15,462,504  | 16,336,804  | 1 | 0 | 1 | 0 |
| Case 40 | 21 | 16,337,102  | 16,338,357  | 2 | 0 | 2 | 1 |
| Case 40 | 21 | 16,338,368  | 18,740,538  | 1 | 0 | 1 | 0 |
| Case 40 | 21 | 18,741,831  | 18,937,978  | 2 | 0 | 2 | 1 |
| Case 40 | 21 | 18,938,080  | 19,044,975  | 1 | 0 | 1 | 0 |
| Case 40 | 21 | 19,046,753  | 19,154,417  | 2 | 0 | 2 | 1 |
| Case 40 | 21 | 19,161,515  | 22,090,256  | 1 | 0 | 1 | 0 |
| Case 40 | 21 | 22,094,839  | 23,109,831  | 2 | 0 | 2 | 1 |
| Case 40 | 21 | 23,110,330  | 27,075,005  | 1 | 0 | 1 | 0 |
| Case 40 | 21 | 27,078,296  | 27,335,022  | 2 | 0 | 2 | 1 |
| Case 40 | 21 | 27,336,168  | 27,537,769  | 1 | 0 | 1 | 0 |
| Case 40 | 21 | 27,544,041  | 27,666,882  | 2 | 0 | 2 | 1 |
| Case 40 | 21 | 27,676,401  | 27,723,281  | 1 | 0 | 1 | 0 |
| Case 40 | 21 | 27,724,640  | 27,796,993  | 2 | 0 | 2 | 1 |
| Case 40 | 21 | 27,800,894  | 28,209,395  | 1 | 0 | 1 | 0 |
| Case 40 | 21 | 28,209,494  | 28,223,382  | 2 | 0 | 2 | 1 |
| Case 40 | 21 | 28,225,582  | 28,296,559  | 1 | 0 | 1 | 0 |
| Case 40 | 21 | 28,296,688  | 28,338,307  | 2 | 0 | 2 | 1 |
| Case 40 | 21 | 28,338,425  | 29,017,708  | 1 | 0 | 1 | 0 |
| Case 40 | 21 | 29,022,265  | 30,441,775  | 2 | 0 | 2 | 1 |
| Case 40 | 21 | 30,445,291  | 30,690,558  | 3 | 0 | 3 | 1 |
| Case 40 | 21 | 30,693,612  | 31,654,830  | 2 | 0 | 2 | 1 |
| Case 40 | 21 | 31,654,917  | 31,719,582  | 3 | 0 | 3 | 1 |
| Case 40 | 21 | 31,719,836  | 32,484,078  | 2 | 0 | 2 | 1 |
| Case 40 | 21 | 32,485,200  | 33,058,677  | 3 | 0 | 3 | 1 |
| Case 40 | 21 | 33,060,747  | 33,140,026  | 2 | 0 | 2 | 1 |
| Case 40 | 21 | 33,146,821  | 33,998,314  | 3 | 0 | 3 | 1 |
| Case 40 | 21 | 33,999,859  | 34,125,319  | 2 | 0 | 2 | 1 |
| Case 40 | 21 | 34,137,026  | 34,806,288  | 3 | 0 | 3 | 1 |
| Case 40 | 21 | 34,809,233  | 35,199,880  | 2 | 0 | 2 | 1 |
| Case 40 | 21 | 35,200,374  | 35,468,912  | 3 | 0 | 3 | 1 |
| Case 40 | 21 | 35,469,168  | 35,922,006  | 2 | 0 | 2 | 1 |
| Case 40 | 21 | 35,926,150  | 36,723,544  | 3 | 0 | 3 | 1 |
| Case 40 | 21 | 36,727,663  | 36,916,787  | 2 | 0 | 2 | 1 |
| Case 40 | 21 | 36,919,816  | 38,511,531  | 3 | 0 | 3 | 1 |
| Case 40 | 21 | 38,512,257  | 38,528,987  | 2 | 0 | 2 | 1 |
| Case 40 | 21 | 38,531,871  | 40,234,202  | 3 | 0 | 3 | 1 |
| Case 40 | 21 | 40,235,830  | 40,289,454  | 2 | 0 | 2 | 1 |
| Case 40 | 21 | 40,291,413  | 40,504,502  | 3 | 0 | 3 | 1 |
| Case 40 | 21 | 40,504,673  | 40,826,063  | 2 | 0 | 2 | 1 |
| Case 40 | 21 | 40,843,234  | 41,416,119  | 3 | 0 | 3 | 1 |
| Case 40 | 21 | 41,416,163  | 41,750,435  | 2 | 0 | 2 | 1 |
| Case 40 | 21 | 41,751,640  | 44,836,747  | 3 | 0 | 3 | 1 |
| Case 40 | 21 | 44,836,770  | 44,840,278  | 2 | 0 | 2 | 1 |
| Case 40 | 21 | 44,840,296  | 47,419,606  | 3 | 0 | 3 | 1 |
| Case 40 | 21 | 47,421,947  | 47,423,869  | 2 | 0 | 2 | 1 |
| Case 40 | 21 | 47,424,346  | 47,704,399  | 3 | 0 | 3 | 1 |
| Case 40 | 21 | 47,704,461  | 47,738,111  | 2 | 0 | 2 | 1 |
| Case 40 | 21 | 47,738,114  | 47,805,891  | 3 | 0 | 3 | 1 |
| Case 40 | 21 | 47,808,673  | 47,863,853  | 2 | 0 | 2 | 1 |
| Case 40 | 21 | 47,864,633  | 48,100,155  | 3 | 0 | 3 | 1 |
| Case 40 | 22 | 16,114,244  | 17,591,089  | 2 | 0 | 2 | 1 |
| Case 40 | 22 | 17,593,685  | 51,195,728  | 3 | 0 | 3 | 1 |
| Case 43 | 1  | 82,154      | 97,856,946  | 1 | 1 | 2 | 0 |
| Case 43 | 1  | 97,857,061  | 97,981,343  | 2 | 0 | 2 | 1 |
| Case 43 | 1  | 97,981,395  | 121,346,616 | 1 | 1 | 2 | 0 |
| Case 43 | 1  | 142,649,718 | 233,608,565 | 1 | 1 | 2 | 0 |

|         |   |             |             |   |   |   |   |
|---------|---|-------------|-------------|---|---|---|---|
| Case 43 | 1 | 233,619,908 | 233,636,625 | 7 | 0 | 7 | 1 |
| Case 43 | 1 | 233,643,110 | 233,655,782 | 2 | 0 | 2 | 1 |
| Case 43 | 1 | 233,656,871 | 249,218,992 | 1 | 1 | 2 | 0 |
| Case 43 | 2 | 18,674      | 5,487,097   | 2 | 0 | 2 | 1 |
| Case 43 | 2 | 5,487,627   | 6,440,370   | 1 | 1 | 2 | 0 |
| Case 43 | 2 | 6,443,216   | 6,704,257   | 1 | 0 | 1 | 0 |
| Case 43 | 2 | 6,704,579   | 13,279,945  | 2 | 0 | 2 | 1 |
| Case 43 | 2 | 13,282,236  | 14,286,717  | 1 | 0 | 1 | 0 |
| Case 43 | 2 | 14,286,928  | 49,510,173  | 2 | 0 | 2 | 1 |
| Case 43 | 2 | 49,515,633  | 50,874,084  | 1 | 1 | 2 | 0 |
| Case 43 | 2 | 50,874,309  | 57,431,622  | 2 | 0 | 2 | 1 |
| Case 43 | 2 | 57,434,112  | 59,497,734  | 1 | 0 | 1 | 0 |
| Case 43 | 2 | 59,499,347  | 75,620,383  | 2 | 0 | 2 | 1 |
| Case 43 | 2 | 75,627,059  | 75,846,545  | 1 | 1 | 2 | 0 |
| Case 43 | 2 | 75,846,558  | 79,178,130  | 1 | 0 | 1 | 0 |
| Case 43 | 2 | 79,182,821  | 92,081,640  | 2 | 0 | 2 | 1 |
| Case 43 | 2 | 95,429,424  | 99,784,407  | 2 | 0 | 2 | 1 |
| Case 43 | 2 | 99,787,009  | 100,679,024 | 1 | 0 | 1 | 0 |
| Case 43 | 2 | 100,683,550 | 104,298,541 | 2 | 0 | 2 | 1 |
| Case 43 | 2 | 104,302,099 | 105,114,879 | 1 | 0 | 1 | 0 |
| Case 43 | 2 | 105,115,341 | 133,516,599 | 2 | 0 | 2 | 1 |
| Case 43 | 2 | 133,517,783 | 134,548,819 | 1 | 1 | 2 | 0 |
| Case 43 | 2 | 134,549,860 | 141,623,459 | 2 | 0 | 2 | 1 |
| Case 43 | 2 | 141,623,557 | 142,012,151 | 1 | 0 | 1 | 0 |
| Case 43 | 2 | 142,012,161 | 218,352,602 | 2 | 0 | 2 | 1 |
| Case 43 | 2 | 218,354,130 | 220,115,640 | 2 | 1 | 3 | 0 |
| Case 43 | 2 | 220,116,831 | 220,474,173 | 2 | 0 | 2 | 1 |
| Case 43 | 2 | 220,476,407 | 230,074,837 | 2 | 1 | 3 | 0 |
| Case 43 | 2 | 230,076,347 | 232,457,762 | 2 | 0 | 2 | 1 |
| Case 43 | 2 | 232,457,829 | 235,103,289 | 2 | 1 | 3 | 0 |
| Case 43 | 2 | 235,110,179 | 235,607,892 | 2 | 0 | 2 | 1 |
| Case 43 | 2 | 235,609,613 | 238,243,281 | 2 | 1 | 3 | 0 |
| Case 43 | 2 | 238,243,292 | 243,048,760 | 2 | 0 | 2 | 1 |
| Case 43 | 3 | 61,495      | 90,442,925  | 1 | 1 | 2 | 0 |
| Case 43 | 3 | 93,537,290  | 197,838,262 | 1 | 1 | 2 | 0 |
| Case 43 | 4 | 71,566      | 575,087     | 1 | 0 | 1 | 0 |
| Case 43 | 4 | 583,559     | 5,749,784   | 2 | 0 | 2 | 1 |
| Case 43 | 4 | 5,749,814   | 6,303,022   | 1 | 1 | 2 | 0 |
| Case 43 | 4 | 6,303,072   | 43,296,814  | 2 | 0 | 2 | 1 |
| Case 43 | 4 | 43,298,226  | 47,543,891  | 1 | 0 | 1 | 0 |
| Case 43 | 4 | 47,544,012  | 49,620,898  | 2 | 0 | 2 | 1 |
| Case 43 | 4 | 52,697,856  | 60,442,490  | 2 | 0 | 2 | 1 |
| Case 43 | 4 | 60,458,820  | 66,562,536  | 1 | 0 | 1 | 0 |
| Case 43 | 4 | 66,563,086  | 69,962,375  | 2 | 0 | 2 | 1 |
| Case 43 | 4 | 69,962,449  | 70,715,954  | 1 | 0 | 1 | 0 |
| Case 43 | 4 | 70,716,022  | 90,770,408  | 2 | 0 | 2 | 1 |
| Case 43 | 4 | 90,775,212  | 93,344,512  | 1 | 0 | 1 | 0 |
| Case 43 | 4 | 93,346,743  | 106,604,223 | 2 | 0 | 2 | 1 |
| Case 43 | 4 | 106,613,821 | 108,829,730 | 1 | 0 | 1 | 0 |
| Case 43 | 4 | 108,829,880 | 117,803,266 | 2 | 0 | 2 | 1 |
| Case 43 | 4 | 117,830,724 | 118,722,033 | 1 | 0 | 1 | 0 |
| Case 43 | 4 | 118,722,199 | 126,400,922 | 2 | 0 | 2 | 1 |
| Case 43 | 4 | 126,400,970 | 126,411,388 | 1 | 1 | 2 | 0 |
| Case 43 | 4 | 126,411,605 | 126,412,283 | 2 | 0 | 2 | 1 |
| Case 43 | 4 | 126,412,332 | 128,304,199 | 1 | 0 | 1 | 0 |
| Case 43 | 4 | 128,313,686 | 130,952,981 | 2 | 0 | 2 | 1 |
| Case 43 | 4 | 130,956,277 | 138,440,012 | 1 | 0 | 1 | 0 |
| Case 43 | 4 | 138,442,265 | 156,055,961 | 2 | 0 | 2 | 1 |
| Case 43 | 4 | 156,057,352 | 157,383,426 | 1 | 0 | 1 | 0 |
| Case 43 | 4 | 157,383,920 | 160,840,630 | 2 | 0 | 2 | 1 |
| Case 43 | 4 | 160,857,395 | 161,968,079 | 1 | 0 | 1 | 0 |

|         |   |             |             |   |   |   |   |
|---------|---|-------------|-------------|---|---|---|---|
| Case 43 | 4 | 161,982,414 | 177,180,575 | 2 | 0 | 2 | 1 |
| Case 43 | 4 | 177,184,276 | 178,069,165 | 1 | 0 | 1 | 0 |
| Case 43 | 4 | 178,072,504 | 179,362,277 | 2 | 0 | 2 | 1 |
| Case 43 | 4 | 179,363,159 | 181,907,769 | 1 | 0 | 1 | 0 |
| Case 43 | 4 | 181,910,926 | 190,963,766 | 2 | 0 | 2 | 1 |
| Case 43 | 5 | 38,139      | 40,854,228  | 2 | 0 | 2 | 1 |
| Case 43 | 5 | 40,854,296  | 41,006,444  | 0 | 0 | 0 | 0 |
| Case 43 | 5 | 41,007,450  | 41,161,898  | 1 | 1 | 2 | 0 |
| Case 43 | 5 | 41,161,919  | 42,422,855  | 2 | 0 | 2 | 1 |
| Case 43 | 5 | 42,455,956  | 46,399,093  | 1 | 0 | 1 | 0 |
| Case 43 | 5 | 49,457,282  | 51,879,370  | 1 | 0 | 1 | 0 |
| Case 43 | 5 | 51,886,039  | 56,047,451  | 2 | 0 | 2 | 1 |
| Case 43 | 5 | 56,061,564  | 57,254,667  | 1 | 1 | 2 | 0 |
| Case 43 | 5 | 57,274,320  | 61,437,645  | 2 | 0 | 2 | 1 |
| Case 43 | 5 | 61,438,771  | 61,876,773  | 1 | 0 | 1 | 0 |
| Case 43 | 5 | 61,880,915  | 64,511,219  | 2 | 0 | 2 | 1 |
| Case 43 | 5 | 64,512,523  | 64,842,156  | 1 | 0 | 1 | 0 |
| Case 43 | 5 | 64,842,825  | 83,319,613  | 2 | 0 | 2 | 1 |
| Case 43 | 5 | 83,329,010  | 88,453,376  | 1 | 0 | 1 | 0 |
| Case 43 | 5 | 88,468,185  | 100,221,465 | 2 | 0 | 2 | 1 |
| Case 43 | 5 | 100,231,428 | 110,542,451 | 1 | 0 | 1 | 0 |
| Case 43 | 5 | 110,542,854 | 139,930,736 | 2 | 0 | 2 | 1 |
| Case 43 | 5 | 139,931,384 | 139,931,652 | 0 | 0 | 0 | 0 |
| Case 43 | 5 | 139,931,653 | 140,166,953 | 1 | 1 | 2 | 0 |
| Case 43 | 5 | 140,167,025 | 140,176,840 | 1 | 0 | 1 | 0 |
| Case 43 | 5 | 140,176,842 | 153,029,960 | 2 | 0 | 2 | 1 |
| Case 43 | 5 | 153,030,051 | 153,735,484 | 1 | 1 | 2 | 0 |
| Case 43 | 5 | 153,737,288 | 180,693,127 | 2 | 0 | 2 | 1 |
| Case 43 | 6 | 108,666     | 1,067,284   | 1 | 1 | 2 | 0 |
| Case 43 | 6 | 1,074,922   | 28,696,063  | 2 | 0 | 2 | 1 |
| Case 43 | 6 | 28,697,086  | 28,922,719  | 1 | 1 | 2 | 0 |
| Case 43 | 6 | 28,923,367  | 28,923,367  | 2 | 0 | 2 | 1 |
| Case 43 | 6 | 28,923,980  | 29,431,698  | 1 | 0 | 1 | 0 |
| Case 43 | 6 | 29,432,390  | 32,366,226  | 2 | 0 | 2 | 1 |
| Case 43 | 6 | 32,366,421  | 32,373,801  | 0 | 0 | 0 | 0 |
| Case 43 | 6 | 32,374,640  | 32,395,036  | 1 | 1 | 2 | 0 |
| Case 43 | 6 | 32,395,568  | 39,026,703  | 2 | 0 | 2 | 1 |
| Case 43 | 6 | 39,030,401  | 40,581,254  | 1 | 1 | 2 | 0 |
| Case 43 | 6 | 40,582,580  | 57,540,722  | 2 | 0 | 2 | 1 |
| Case 43 | 6 | 57,561,493  | 58,752,089  | 1 | 0 | 1 | 0 |
| Case 43 | 6 | 61,891,118  | 68,277,173  | 1 | 0 | 1 | 0 |
| Case 43 | 6 | 68,277,575  | 71,599,788  | 2 | 0 | 2 | 1 |
| Case 43 | 6 | 71,599,826  | 71,997,278  | 1 | 1 | 2 | 0 |
| Case 43 | 6 | 71,999,404  | 81,385,896  | 2 | 0 | 2 | 1 |
| Case 43 | 6 | 81,387,450  | 82,140,311  | 1 | 0 | 1 | 0 |
| Case 43 | 6 | 82,149,482  | 84,504,749  | 2 | 0 | 2 | 1 |
| Case 43 | 6 | 84,520,520  | 85,122,601  | 1 | 0 | 1 | 0 |
| Case 43 | 6 | 85,125,094  | 111,695,444 | 2 | 0 | 2 | 1 |
| Case 43 | 6 | 111,695,524 | 111,966,134 | 1 | 0 | 1 | 0 |
| Case 43 | 6 | 111,968,788 | 119,878,915 | 2 | 0 | 2 | 1 |
| Case 43 | 6 | 119,881,344 | 170,980,171 | 1 | 1 | 2 | 0 |
| Case 43 | 7 | 44,935      | 6,062,828   | 3 | 0 | 3 | 1 |
| Case 43 | 7 | 6,063,036   | 12,695,507  | 4 | 0 | 4 | 1 |
| Case 43 | 7 | 12,697,797  | 13,696,843  | 3 | 2 | 5 | 0 |
| Case 43 | 7 | 13,697,970  | 15,735,559  | 3 | 1 | 4 | 0 |
| Case 43 | 7 | 15,739,044  | 20,180,292  | 3 | 3 | 6 | 0 |
| Case 43 | 7 | 20,180,717  | 20,967,833  | 4 | 0 | 4 | 1 |
| Case 43 | 7 | 20,970,137  | 30,255,901  | 3 | 3 | 6 | 0 |
| Case 43 | 7 | 30,270,403  | 31,323,316  | 4 | 2 | 6 | 0 |
| Case 43 | 7 | 31,327,300  | 34,851,475  | 3 | 3 | 6 | 0 |
| Case 43 | 7 | 34,852,665  | 41,375,956  | 4 | 0 | 4 | 1 |

|         |   |             |             |   |   |   |   |
|---------|---|-------------|-------------|---|---|---|---|
| Case 43 | 7 | 41,382,433  | 46,619,758  | 3 | 0 | 3 | 1 |
| Case 43 | 7 | 46,620,145  | 47,224,680  | 2 | 0 | 2 | 1 |
| Case 43 | 7 | 47,225,542  | 47,847,751  | 4 | 0 | 4 | 1 |
| Case 43 | 7 | 47,847,865  | 49,378,273  | 3 | 0 | 3 | 1 |
| Case 43 | 7 | 49,403,143  | 52,866,542  | 4 | 0 | 4 | 1 |
| Case 43 | 7 | 52,868,222  | 58,019,061  | 3 | 0 | 3 | 1 |
| Case 43 | 7 | 61,056,053  | 63,758,482  | 3 | 0 | 3 | 1 |
| Case 43 | 7 | 63,771,372  | 70,880,650  | 2 | 0 | 2 | 1 |
| Case 43 | 7 | 70,880,998  | 71,654,356  | 4 | 0 | 4 | 1 |
| Case 43 | 7 | 71,659,538  | 72,169,613  | 3 | 0 | 3 | 1 |
| Case 43 | 7 | 72,193,854  | 149,484,963 | 2 | 0 | 2 | 1 |
| Case 43 | 7 | 149,484,986 | 149,528,255 | 1 | 0 | 1 | 0 |
| Case 43 | 7 | 149,528,262 | 159,119,486 | 2 | 0 | 2 | 1 |
| Case 43 | 8 | 164,984     | 1,721,090   | 1 | 1 | 2 | 0 |
| Case 43 | 8 | 1,723,749   | 1,908,052   | 1 | 0 | 1 | 0 |
| Case 43 | 8 | 1,911,393   | 2,783,183   | 1 | 1 | 2 | 0 |
| Case 43 | 8 | 2,784,418   | 6,016,650   | 1 | 0 | 1 | 0 |
| Case 43 | 8 | 6,016,801   | 9,437,352   | 1 | 1 | 2 | 0 |
| Case 43 | 8 | 9,437,705   | 10,722,058  | 1 | 0 | 1 | 0 |
| Case 43 | 8 | 10,726,464  | 11,829,308  | 1 | 1 | 2 | 0 |
| Case 43 | 8 | 11,830,502  | 17,197,967  | 1 | 0 | 1 | 0 |
| Case 43 | 8 | 17,198,915  | 17,613,005  | 1 | 1 | 2 | 0 |
| Case 43 | 8 | 17,613,010  | 20,184,824  | 1 | 0 | 1 | 0 |
| Case 43 | 8 | 20,185,105  | 21,768,370  | 1 | 1 | 2 | 0 |
| Case 43 | 8 | 21,769,432  | 23,104,413  | 1 | 0 | 1 | 0 |
| Case 43 | 8 | 23,104,612  | 27,516,706  | 1 | 1 | 2 | 0 |
| Case 43 | 8 | 27,516,855  | 27,808,994  | 1 | 0 | 1 | 0 |
| Case 43 | 8 | 27,810,577  | 30,469,817  | 1 | 1 | 2 | 0 |
| Case 43 | 8 | 30,469,967  | 33,340,477  | 1 | 0 | 1 | 0 |
| Case 43 | 8 | 33,342,018  | 38,884,222  | 1 | 1 | 2 | 0 |
| Case 43 | 8 | 38,897,470  | 39,624,713  | 1 | 0 | 1 | 0 |
| Case 43 | 8 | 39,626,922  | 39,746,386  | 2 | 0 | 2 | 1 |
| Case 43 | 8 | 39,751,406  | 41,165,794  | 2 | 1 | 3 | 0 |
| Case 43 | 8 | 41,174,462  | 43,791,691  | 1 | 1 | 2 | 0 |
| Case 43 | 8 | 46,886,735  | 50,044,748  | 1 | 1 | 2 | 0 |
| Case 43 | 8 | 50,052,500  | 51,543,713  | 2 | 0 | 2 | 1 |
| Case 43 | 8 | 51,546,026  | 52,948,365  | 1 | 1 | 2 | 0 |
| Case 43 | 8 | 52,949,557  | 57,699,282  | 2 | 0 | 2 | 1 |
| Case 43 | 8 | 57,700,914  | 63,214,002  | 2 | 1 | 3 | 0 |
| Case 43 | 8 | 63,222,881  | 69,104,645  | 1 | 1 | 2 | 0 |
| Case 43 | 8 | 69,105,897  | 69,799,082  | 2 | 0 | 2 | 1 |
| Case 43 | 8 | 69,815,776  | 76,315,205  | 2 | 1 | 3 | 0 |
| Case 43 | 8 | 76,318,607  | 79,762,658  | 1 | 1 | 2 | 0 |
| Case 43 | 8 | 79,766,499  | 82,119,503  | 2 | 1 | 3 | 0 |
| Case 43 | 8 | 82,123,005  | 84,592,640  | 2 | 0 | 2 | 1 |
| Case 43 | 8 | 84,595,022  | 93,237,876  | 1 | 1 | 2 | 0 |
| Case 43 | 8 | 93,247,362  | 98,585,277  | 2 | 1 | 3 | 0 |
| Case 43 | 8 | 98,586,824  | 98,900,410  | 2 | 0 | 2 | 1 |
| Case 43 | 8 | 98,902,730  | 100,180,871 | 2 | 1 | 3 | 0 |
| Case 43 | 8 | 100,182,333 | 100,844,796 | 2 | 0 | 2 | 1 |
| Case 43 | 8 | 100,844,858 | 104,412,761 | 2 | 1 | 3 | 0 |
| Case 43 | 8 | 104,413,814 | 106,900,146 | 2 | 0 | 2 | 1 |
| Case 43 | 8 | 106,901,957 | 109,348,150 | 2 | 1 | 3 | 0 |
| Case 43 | 8 | 109,354,102 | 110,478,857 | 2 | 0 | 2 | 1 |
| Case 43 | 8 | 110,489,507 | 113,460,930 | 1 | 1 | 2 | 0 |
| Case 43 | 8 | 113,469,872 | 117,000,279 | 2 | 0 | 2 | 1 |
| Case 43 | 8 | 117,007,850 | 118,306,732 | 1 | 1 | 2 | 0 |
| Case 43 | 8 | 118,307,005 | 133,913,747 | 2 | 1 | 3 | 0 |
| Case 43 | 8 | 133,916,504 | 134,320,263 | 2 | 0 | 2 | 1 |
| Case 43 | 8 | 134,323,337 | 136,086,741 | 2 | 1 | 3 | 0 |
| Case 43 | 8 | 136,089,776 | 139,075,196 | 1 | 1 | 2 | 0 |

|         |    |             |             |   |   |   |   |
|---------|----|-------------|-------------|---|---|---|---|
| Case 43 | 8  | 139,075,826 | 140,720,163 | 2 | 1 | 3 | 0 |
| Case 43 | 8  | 140,720,412 | 142,466,821 | 1 | 1 | 2 | 0 |
| Case 43 | 8  | 142,467,575 | 143,374,261 | 2 | 1 | 3 | 0 |
| Case 43 | 8  | 143,376,802 | 143,608,639 | 2 | 0 | 2 | 1 |
| Case 43 | 8  | 143,609,913 | 146,034,733 | 1 | 1 | 2 | 0 |
| Case 43 | 8  | 146,042,603 | 146,293,414 | 2 | 0 | 2 | 1 |
| Case 43 | 9  | 46,587      | 9,943,710   | 2 | 0 | 2 | 1 |
| Case 43 | 9  | 9,945,265   | 12,281,372  | 1 | 0 | 1 | 0 |
| Case 43 | 9  | 12,284,611  | 19,847,234  | 2 | 0 | 2 | 1 |
| Case 43 | 9  | 19,849,403  | 31,837,334  | 1 | 0 | 1 | 0 |
| Case 43 | 9  | 31,842,496  | 46,944,322  | 2 | 0 | 2 | 1 |
| Case 43 | 9  | 65,629,772  | 81,447,644  | 2 | 0 | 2 | 1 |
| Case 43 | 9  | 81,451,697  | 82,489,957  | 1 | 1 | 2 | 0 |
| Case 43 | 9  | 82,494,427  | 84,391,174  | 2 | 0 | 2 | 1 |
| Case 43 | 9  | 84,392,044  | 85,167,648  | 1 | 1 | 2 | 0 |
| Case 43 | 9  | 85,168,377  | 104,368,397 | 2 | 0 | 2 | 1 |
| Case 43 | 9  | 104,371,037 | 104,782,096 | 1 | 1 | 2 | 0 |
| Case 43 | 9  | 104,789,573 | 106,585,651 | 1 | 0 | 1 | 0 |
| Case 43 | 9  | 106,593,860 | 110,885,479 | 2 | 0 | 2 | 1 |
| Case 43 | 9  | 110,887,234 | 111,130,749 | 1 | 1 | 2 | 0 |
| Case 43 | 9  | 111,140,133 | 121,929,789 | 2 | 0 | 2 | 1 |
| Case 43 | 9  | 121,929,828 | 123,147,885 | 1 | 1 | 2 | 0 |
| Case 43 | 9  | 123,148,937 | 128,316,645 | 2 | 0 | 2 | 1 |
| Case 43 | 9  | 128,319,624 | 129,471,897 | 1 | 1 | 2 | 0 |
| Case 43 | 9  | 129,477,410 | 136,762,800 | 2 | 0 | 2 | 1 |
| Case 43 | 9  | 136,762,812 | 137,503,695 | 1 | 1 | 2 | 0 |
| Case 43 | 9  | 137,506,340 | 139,390,543 | 2 | 0 | 2 | 1 |
| Case 43 | 9  | 139,390,546 | 141,066,491 | 1 | 0 | 1 | 0 |
| Case 43 | 10 | 98,087      | 37,280,842  | 1 | 1 | 2 | 0 |
| Case 43 | 10 | 37,283,349  | 39,097,912  | 1 | 0 | 1 | 0 |
| Case 43 | 10 | 42,436,301  | 43,112,866  | 1 | 0 | 1 | 0 |
| Case 43 | 10 | 43,113,530  | 52,601,645  | 1 | 1 | 2 | 0 |
| Case 43 | 10 | 52,608,657  | 53,581,387  | 1 | 0 | 1 | 0 |
| Case 43 | 10 | 53,584,234  | 56,777,654  | 1 | 1 | 2 | 0 |
| Case 43 | 10 | 56,784,302  | 58,828,890  | 1 | 0 | 1 | 0 |
| Case 43 | 10 | 58,836,950  | 96,066,343  | 1 | 1 | 2 | 0 |
| Case 43 | 10 | 96,067,947  | 96,795,524  | 1 | 0 | 1 | 0 |
| Case 43 | 10 | 96,796,861  | 135,477,883 | 1 | 1 | 2 | 0 |
| Case 43 | 11 | 193,146     | 4,613,366   | 2 | 0 | 2 | 1 |
| Case 43 | 11 | 4,615,767   | 6,977,311   | 2 | 1 | 3 | 0 |
| Case 43 | 11 | 6,977,325   | 8,122,059   | 2 | 0 | 2 | 1 |
| Case 43 | 11 | 8,122,113   | 18,317,571  | 2 | 1 | 3 | 0 |
| Case 43 | 11 | 18,317,644  | 19,100,238  | 2 | 0 | 2 | 1 |
| Case 43 | 11 | 19,100,736  | 20,060,147  | 2 | 1 | 3 | 0 |
| Case 43 | 11 | 20,062,704  | 27,036,462  | 2 | 0 | 2 | 1 |
| Case 43 | 11 | 27,039,674  | 30,206,532  | 2 | 1 | 3 | 0 |
| Case 43 | 11 | 30,206,846  | 31,453,738  | 1 | 1 | 2 | 0 |
| Case 43 | 11 | 31,455,093  | 33,797,408  | 2 | 0 | 2 | 1 |
| Case 43 | 11 | 33,799,472  | 35,945,048  | 2 | 1 | 3 | 0 |
| Case 43 | 11 | 35,947,565  | 39,620,131  | 2 | 0 | 2 | 1 |
| Case 43 | 11 | 39,623,896  | 42,859,152  | 1 | 1 | 2 | 0 |
| Case 43 | 11 | 42,864,284  | 45,580,099  | 2 | 1 | 3 | 0 |
| Case 43 | 11 | 45,585,234  | 46,018,139  | 2 | 0 | 2 | 1 |
| Case 43 | 11 | 46,022,934  | 47,814,450  | 2 | 1 | 3 | 0 |
| Case 43 | 11 | 47,819,765  | 51,591,253  | 2 | 0 | 2 | 1 |
| Case 43 | 11 | 54,794,237  | 56,086,498  | 2 | 0 | 2 | 1 |
| Case 43 | 11 | 56,086,553  | 57,065,220  | 2 | 1 | 3 | 0 |
| Case 43 | 11 | 57,066,448  | 65,159,382  | 2 | 0 | 2 | 1 |
| Case 43 | 11 | 65,161,129  | 67,267,871  | 1 | 1 | 2 | 0 |
| Case 43 | 11 | 67,268,048  | 69,574,816  | 2 | 0 | 2 | 1 |
| Case 43 | 11 | 69,579,070  | 71,193,062  | 2 | 1 | 3 | 0 |



|         |    |             |             |   |   |   |   |
|---------|----|-------------|-------------|---|---|---|---|
| Case 43 | 11 | 71,193,921  | 73,716,960  | 2 | 0 | 2 | 1 |
| Case 43 | 11 | 73,717,219  | 73,994,138  | 1 | 1 | 2 | 0 |
| Case 43 | 11 | 73,995,696  | 76,507,692  | 2 | 1 | 3 | 0 |
| Case 43 | 11 | 76,508,843  | 77,335,982  | 2 | 0 | 2 | 1 |
| Case 43 | 11 | 77,336,010  | 79,878,829  | 2 | 1 | 3 | 0 |
| Case 43 | 11 | 79,881,442  | 81,078,376  | 2 | 0 | 2 | 1 |
| Case 43 | 11 | 81,078,984  | 82,262,056  | 2 | 1 | 3 | 0 |
| Case 43 | 11 | 82,265,147  | 82,821,382  | 1 | 1 | 2 | 0 |
| Case 43 | 11 | 82,822,511  | 85,375,739  | 2 | 0 | 2 | 1 |
| Case 43 | 11 | 85,377,707  | 88,022,988  | 2 | 1 | 3 | 0 |
| Case 43 | 11 | 88,027,209  | 94,862,019  | 2 | 0 | 2 | 1 |
| Case 43 | 11 | 94,862,157  | 97,023,053  | 2 | 1 | 3 | 0 |
| Case 43 | 11 | 97,025,717  | 100,223,636 | 2 | 0 | 2 | 1 |
| Case 43 | 11 | 100,226,773 | 102,825,010 | 2 | 1 | 3 | 0 |
| Case 43 | 11 | 102,825,091 | 109,576,347 | 1 | 1 | 2 | 0 |
| Case 43 | 11 | 109,580,367 | 114,125,260 | 2 | 1 | 3 | 0 |
| Case 43 | 11 | 114,125,324 | 114,576,683 | 2 | 0 | 2 | 1 |
| Case 43 | 11 | 114,577,395 | 118,455,293 | 2 | 1 | 3 | 0 |
| Case 43 | 11 | 118,455,310 | 119,183,093 | 2 | 0 | 2 | 1 |
| Case 43 | 11 | 119,185,347 | 123,555,558 | 2 | 1 | 3 | 0 |
| Case 43 | 11 | 123,557,596 | 125,461,787 | 2 | 0 | 2 | 1 |
| Case 43 | 11 | 125,472,616 | 128,701,651 | 2 | 1 | 3 | 0 |
| Case 43 | 11 | 128,706,755 | 131,146,657 | 2 | 0 | 2 | 1 |
| Case 43 | 11 | 131,148,377 | 134,732,363 | 2 | 1 | 3 | 0 |
| Case 43 | 11 | 134,734,296 | 134,934,063 | 2 | 0 | 2 | 1 |
| Case 43 | 12 | 191,619     | 34,853,011  | 1 | 1 | 2 | 0 |
| Case 43 | 12 | 37,876,400  | 131,894,848 | 1 | 1 | 2 | 0 |
| Case 43 | 12 | 131,896,732 | 133,257,789 | 2 | 0 | 2 | 1 |
| Case 43 | 12 | 133,257,837 | 133,810,935 | 1 | 0 | 1 | 0 |
| Case 43 | 13 | 19,058,717  | 27,930,900  | 1 | 1 | 2 | 0 |
| Case 43 | 13 | 27,933,910  | 29,653,320  | 2 | 1 | 3 | 0 |
| Case 43 | 13 | 29,659,206  | 115,103,529 | 1 | 1 | 2 | 0 |
| Case 43 | 14 | 19,280,733  | 20,653,540  | 1 | 0 | 1 | 0 |
| Case 43 | 14 | 20,654,962  | 22,544,393  | 2 | 0 | 2 | 1 |
| Case 43 | 14 | 22,545,327  | 23,015,874  | 2 | 1 | 3 | 0 |
| Case 43 | 14 | 23,018,808  | 26,211,789  | 1 | 1 | 2 | 0 |
| Case 43 | 14 | 26,218,549  | 29,807,033  | 1 | 0 | 1 | 0 |
| Case 43 | 14 | 29,811,758  | 41,232,118  | 2 | 0 | 2 | 1 |
| Case 43 | 14 | 41,234,342  | 45,693,275  | 1 | 0 | 1 | 0 |
| Case 43 | 14 | 45,693,307  | 58,588,313  | 2 | 0 | 2 | 1 |
| Case 43 | 14 | 58,593,283  | 59,074,136  | 1 | 0 | 1 | 0 |
| Case 43 | 14 | 59,077,925  | 78,390,880  | 2 | 0 | 2 | 1 |
| Case 43 | 14 | 78,392,126  | 80,355,422  | 1 | 1 | 2 | 0 |
| Case 43 | 14 | 80,357,074  | 83,348,722  | 2 | 0 | 2 | 1 |
| Case 43 | 14 | 83,350,784  | 85,180,967  | 1 | 0 | 1 | 0 |
| Case 43 | 14 | 85,184,561  | 91,671,139  | 2 | 0 | 2 | 1 |
| Case 43 | 14 | 91,671,160  | 92,040,793  | 1 | 0 | 1 | 0 |
| Case 43 | 14 | 92,041,294  | 101,119,364 | 2 | 0 | 2 | 1 |
| Case 43 | 14 | 101,120,234 | 101,776,302 | 1 | 1 | 2 | 0 |
| Case 43 | 14 | 101,781,338 | 107,287,663 | 2 | 0 | 2 | 1 |
| Case 43 | 15 | 20,034,919  | 102,461,162 | 1 | 1 | 2 | 0 |
| Case 43 | 16 | 88,165      | 613,322     | 2 | 0 | 2 | 1 |
| Case 43 | 16 | 613,344     | 2,286,876   | 1 | 0 | 1 | 0 |
| Case 43 | 16 | 2,287,231   | 4,343,620   | 2 | 0 | 2 | 1 |
| Case 43 | 16 | 4,347,504   | 4,496,909   | 1 | 0 | 1 | 0 |
| Case 43 | 16 | 4,497,014   | 5,874,639   | 2 | 0 | 2 | 1 |
| Case 43 | 16 | 5,878,184   | 7,009,582   | 1 | 1 | 2 | 0 |
| Case 43 | 16 | 7,010,776   | 7,774,639   | 2 | 0 | 2 | 1 |
| Case 43 | 16 | 7,776,124   | 9,805,919   | 1 | 1 | 2 | 0 |
| Case 43 | 16 | 9,807,418   | 17,312,099  | 2 | 0 | 2 | 1 |
| Case 43 | 16 | 17,313,288  | 19,883,375  | 1 | 1 | 2 | 0 |

|         |    |            |            |   |   |   |   |
|---------|----|------------|------------|---|---|---|---|
| Case 43 | 16 | 19,883,729 | 23,646,617 | 2 | 0 | 2 | 1 |
| Case 43 | 16 | 23,646,857 | 24,014,087 | 1 | 1 | 2 | 0 |
| Case 43 | 16 | 24,016,101 | 35,285,582 | 2 | 0 | 2 | 1 |
| Case 43 | 16 | 46,450,037 | 54,100,006 | 2 | 0 | 2 | 1 |
| Case 43 | 16 | 54,100,518 | 55,304,203 | 1 | 1 | 2 | 0 |
| Case 43 | 16 | 55,305,575 | 60,462,358 | 2 | 0 | 2 | 1 |
| Case 43 | 16 | 60,463,410 | 63,896,080 | 1 | 0 | 1 | 0 |
| Case 43 | 16 | 63,900,434 | 81,442,702 | 2 | 0 | 2 | 1 |
| Case 43 | 16 | 81,442,932 | 81,588,142 | 1 | 1 | 2 | 0 |
| Case 43 | 16 | 81,589,983 | 90,274,695 | 2 | 0 | 2 | 1 |
| Case 43 | 17 | 11,885     | 22,242,355 | 2 | 0 | 2 | 1 |
| Case 43 | 17 | 25,268,142 | 25,401,787 | 2 | 0 | 2 | 1 |
| Case 43 | 17 | 25,402,163 | 34,436,708 | 1 | 1 | 2 | 0 |
| Case 43 | 17 | 34,443,811 | 34,476,396 | 7 | 0 | 7 | 1 |
| Case 43 | 17 | 34,597,521 | 43,364,638 | 1 | 1 | 2 | 0 |
| Case 43 | 17 | 43,364,914 | 44,345,063 | 2 | 1 | 3 | 0 |
| Case 43 | 17 | 44,350,090 | 81,060,040 | 1 | 1 | 2 | 0 |
| Case 43 | 18 | 87,505     | 15,375,878 | 1 | 1 | 2 | 0 |
| Case 43 | 18 | 18,520,354 | 78,015,180 | 1 | 1 | 2 | 0 |
| Case 43 | 19 | 260,912    | 434,847    | 2 | 0 | 2 | 1 |
| Case 43 | 19 | 436,181    | 1,507,270  | 1 | 0 | 1 | 0 |
| Case 43 | 19 | 1,507,402  | 8,033,689  | 2 | 0 | 2 | 1 |
| Case 43 | 19 | 8,037,040  | 8,612,914  | 1 | 0 | 1 | 0 |
| Case 43 | 19 | 8,615,049  | 9,057,780  | 2 | 0 | 2 | 1 |
| Case 43 | 19 | 9,057,896  | 9,226,265  | 1 | 1 | 2 | 0 |
| Case 43 | 19 | 9,226,425  | 9,844,719  | 1 | 0 | 1 | 0 |
| Case 43 | 19 | 9,863,483  | 11,730,545 | 2 | 0 | 2 | 1 |
| Case 43 | 19 | 11,735,558 | 12,594,969 | 1 | 0 | 1 | 0 |
| Case 43 | 19 | 12,605,955 | 17,922,795 | 2 | 0 | 2 | 1 |
| Case 43 | 19 | 17,923,795 | 17,953,924 | 1 | 0 | 1 | 0 |
| Case 43 | 19 | 17,953,950 | 18,288,898 | 2 | 0 | 2 | 1 |
| Case 43 | 19 | 18,304,123 | 18,311,199 | 6 | 0 | 6 | 1 |
| Case 43 | 19 | 18,312,453 | 19,866,889 | 2 | 0 | 2 | 1 |
| Case 43 | 19 | 19,868,879 | 24,629,285 | 1 | 0 | 1 | 0 |
| Case 43 | 19 | 27,732,159 | 28,332,369 | 1 | 0 | 1 | 0 |
| Case 43 | 19 | 28,351,234 | 30,627,658 | 2 | 0 | 2 | 1 |
| Case 43 | 19 | 30,629,569 | 32,845,370 | 1 | 1 | 2 | 0 |
| Case 43 | 19 | 32,845,598 | 36,898,895 | 2 | 0 | 2 | 1 |
| Case 43 | 19 | 36,900,778 | 38,377,773 | 1 | 0 | 1 | 0 |
| Case 43 | 19 | 38,378,539 | 39,258,110 | 1 | 1 | 2 | 0 |
| Case 43 | 19 | 39,260,000 | 40,338,188 | 2 | 0 | 2 | 1 |
| Case 43 | 19 | 40,338,206 | 41,269,288 | 1 | 0 | 1 | 0 |
| Case 43 | 19 | 41,271,104 | 43,285,368 | 2 | 0 | 2 | 1 |
| Case 43 | 19 | 43,328,006 | 43,762,551 | 6 | 0 | 6 | 1 |
| Case 43 | 19 | 43,770,566 | 44,291,946 | 2 | 0 | 2 | 1 |
| Case 43 | 19 | 44,293,356 | 44,418,981 | 1 | 0 | 1 | 0 |
| Case 43 | 19 | 44,419,053 | 51,375,603 | 2 | 0 | 2 | 1 |
| Case 43 | 19 | 51,377,163 | 51,738,920 | 1 | 1 | 2 | 0 |
| Case 43 | 19 | 51,738,927 | 52,468,384 | 2 | 0 | 2 | 1 |
| Case 43 | 19 | 52,468,527 | 53,741,442 | 1 | 0 | 1 | 0 |
| Case 43 | 19 | 53,741,667 | 58,112,844 | 2 | 0 | 2 | 1 |
| Case 43 | 19 | 58,115,733 | 58,604,997 | 1 | 0 | 1 | 0 |
| Case 43 | 19 | 58,609,443 | 58,853,363 | 2 | 0 | 2 | 1 |
| Case 43 | 19 | 58,857,131 | 59,097,160 | 1 | 0 | 1 | 0 |
| Case 43 | 20 | 63,244     | 19,797,038 | 1 | 1 | 2 | 0 |
| Case 43 | 20 | 19,797,047 | 19,915,251 | 2 | 0 | 2 | 1 |
| Case 43 | 20 | 19,915,770 | 26,293,985 | 1 | 1 | 2 | 0 |
| Case 43 | 20 | 29,425,357 | 29,820,178 | 1 | 1 | 2 | 0 |
| Case 43 | 20 | 29,833,609 | 62,948,788 | 2 | 1 | 3 | 0 |
| Case 43 | 21 | 10,827,533 | 10,971,337 | 1 | 1 | 2 | 0 |
| Case 43 | 21 | 14,368,320 | 24,500,841 | 1 | 1 | 2 | 0 |

|         |    |             |             |   |   |   |   |
|---------|----|-------------|-------------|---|---|---|---|
| Case 43 | 21 | 24,506,241  | 25,227,346  | 1 | 0 | 1 | 0 |
| Case 43 | 21 | 25,227,478  | 47,577,630  | 1 | 1 | 2 | 0 |
| Case 43 | 21 | 47,578,569  | 47,949,017  | 1 | 0 | 1 | 0 |
| Case 43 | 21 | 47,952,128  | 48,100,155  | 1 | 1 | 2 | 0 |
| Case 43 | 22 | 16,114,244  | 17,412,216  | 1 | 0 | 1 | 0 |
| Case 43 | 22 | 17,412,806  | 22,312,879  | 2 | 0 | 2 | 1 |
| Case 43 | 22 | 22,313,598  | 22,573,637  | 6 | 0 | 6 | 1 |
| Case 43 | 22 | 22,584,809  | 38,016,825  | 2 | 0 | 2 | 1 |
| Case 43 | 22 | 38,017,632  | 38,478,804  | 1 | 0 | 1 | 0 |
| Case 43 | 22 | 38,480,659  | 49,832,070  | 2 | 0 | 2 | 1 |
| Case 43 | 22 | 49,832,693  | 50,351,977  | 1 | 1 | 2 | 0 |
| Case 43 | 22 | 50,353,010  | 51,195,728  | 2 | 0 | 2 | 1 |
| Case 44 | 1  | 82,154      | 908,390     | 2 | 2 | 4 | 0 |
| Case 44 | 1  | 908,585     | 949,832     | 2 | 1 | 3 | 0 |
| Case 44 | 1  | 957,640     | 1,849,530   | 2 | 2 | 4 | 0 |
| Case 44 | 1  | 1,849,727   | 10,666,517  | 2 | 1 | 3 | 0 |
| Case 44 | 1  | 10,672,935  | 11,090,287  | 3 | 1 | 4 | 0 |
| Case 44 | 1  | 11,090,814  | 121,346,616 | 2 | 1 | 3 | 0 |
| Case 44 | 1  | 142,649,718 | 145,021,126 | 2 | 1 | 3 | 0 |
| Case 44 | 1  | 145,075,809 | 145,523,906 | 2 | 2 | 4 | 0 |
| Case 44 | 1  | 145,525,085 | 145,564,518 | 2 | 1 | 3 | 0 |
| Case 44 | 1  | 145,567,084 | 151,105,169 | 2 | 2 | 4 | 0 |
| Case 44 | 1  | 151,105,547 | 151,149,487 | 2 | 1 | 3 | 0 |
| Case 44 | 1  | 151,149,490 | 152,185,649 | 2 | 2 | 4 | 0 |
| Case 44 | 1  | 152,191,007 | 152,286,592 | 2 | 1 | 3 | 0 |
| Case 44 | 1  | 152,286,593 | 152,323,427 | 2 | 2 | 4 | 0 |
| Case 44 | 1  | 152,323,433 | 152,329,307 | 2 | 1 | 3 | 0 |
| Case 44 | 1  | 152,329,369 | 153,743,234 | 2 | 2 | 4 | 0 |
| Case 44 | 1  | 153,743,317 | 153,751,917 | 2 | 1 | 3 | 0 |
| Case 44 | 1  | 153,751,926 | 154,815,257 | 2 | 2 | 4 | 0 |
| Case 44 | 1  | 154,816,702 | 155,311,840 | 2 | 1 | 3 | 0 |
| Case 44 | 1  | 155,313,568 | 156,695,537 | 2 | 2 | 4 | 0 |
| Case 44 | 1  | 156,696,974 | 156,843,595 | 2 | 1 | 3 | 0 |
| Case 44 | 1  | 156,844,404 | 157,504,553 | 2 | 2 | 4 | 0 |
| Case 44 | 1  | 157,504,557 | 157,559,247 | 2 | 1 | 3 | 0 |
| Case 44 | 1  | 157,566,136 | 157,927,955 | 2 | 2 | 4 | 0 |
| Case 44 | 1  | 157,930,021 | 158,047,816 | 2 | 1 | 3 | 0 |
| Case 44 | 1  | 158,047,909 | 158,225,050 | 2 | 2 | 4 | 0 |
| Case 44 | 1  | 158,225,083 | 158,369,210 | 2 | 1 | 3 | 0 |
| Case 44 | 1  | 158,370,948 | 158,434,049 | 2 | 2 | 4 | 0 |
| Case 44 | 1  | 158,435,391 | 158,639,501 | 2 | 1 | 3 | 0 |
| Case 44 | 1  | 158,639,504 | 159,751,104 | 2 | 2 | 4 | 0 |
| Case 44 | 1  | 159,751,959 | 160,097,666 | 2 | 1 | 3 | 0 |
| Case 44 | 1  | 160,098,815 | 161,015,711 | 2 | 2 | 4 | 0 |
| Case 44 | 1  | 161,017,556 | 161,168,270 | 2 | 1 | 3 | 0 |
| Case 44 | 1  | 161,172,233 | 167,088,473 | 2 | 2 | 4 | 0 |
| Case 44 | 1  | 167,088,659 | 167,104,790 | 2 | 1 | 3 | 0 |
| Case 44 | 1  | 167,105,038 | 175,110,955 | 2 | 2 | 4 | 0 |
| Case 44 | 1  | 175,113,118 | 175,375,826 | 3 | 0 | 3 | 1 |
| Case 44 | 1  | 175,378,694 | 175,521,376 | 2 | 2 | 4 | 0 |
| Case 44 | 1  | 175,526,526 | 175,891,622 | 2 | 1 | 3 | 0 |
| Case 44 | 1  | 175,894,857 | 176,521,349 | 2 | 2 | 4 | 0 |
| Case 44 | 1  | 176,525,585 | 176,898,702 | 2 | 1 | 3 | 0 |
| Case 44 | 1  | 176,901,432 | 178,450,304 | 2 | 2 | 4 | 0 |
| Case 44 | 1  | 178,454,768 | 178,620,601 | 2 | 1 | 3 | 0 |
| Case 44 | 1  | 178,625,499 | 201,175,715 | 2 | 2 | 4 | 0 |
| Case 44 | 1  | 201,175,768 | 201,182,693 | 2 | 1 | 3 | 0 |
| Case 44 | 1  | 201,183,363 | 204,889,532 | 2 | 2 | 4 | 0 |
| Case 44 | 1  | 204,891,547 | 205,053,265 | 2 | 1 | 3 | 0 |
| Case 44 | 1  | 205,053,315 | 206,223,556 | 2 | 2 | 4 | 0 |
| Case 44 | 1  | 206,224,453 | 206,634,648 | 2 | 1 | 3 | 0 |

|         |   |             |             |   |   |   |   |
|---------|---|-------------|-------------|---|---|---|---|
| Case 44 | 1 | 206,634,709 | 207,076,376 | 2 | 2 | 4 | 0 |
| Case 44 | 1 | 207,077,210 | 207,159,378 | 2 | 1 | 3 | 0 |
| Case 44 | 1 | 207,162,433 | 208,299,199 | 2 | 2 | 4 | 0 |
| Case 44 | 1 | 208,300,491 | 208,390,155 | 2 | 0 | 2 | 1 |
| Case 44 | 1 | 208,390,162 | 209,788,514 | 2 | 2 | 4 | 0 |
| Case 44 | 1 | 209,788,656 | 209,823,403 | 2 | 1 | 3 | 0 |
| Case 44 | 1 | 209,823,424 | 227,909,907 | 2 | 2 | 4 | 0 |
| Case 44 | 1 | 227,912,474 | 228,003,871 | 2 | 1 | 3 | 0 |
| Case 44 | 1 | 228,003,901 | 228,247,351 | 2 | 2 | 4 | 0 |
| Case 44 | 1 | 228,260,728 | 228,613,005 | 2 | 1 | 3 | 0 |
| Case 44 | 1 | 228,613,020 | 230,828,873 | 2 | 2 | 4 | 0 |
| Case 44 | 1 | 230,836,702 | 230,881,063 | 2 | 1 | 3 | 0 |
| Case 44 | 1 | 230,881,658 | 237,974,720 | 2 | 2 | 4 | 0 |
| Case 44 | 1 | 237,975,768 | 238,126,784 | 2 | 1 | 3 | 0 |
| Case 44 | 1 | 238,128,633 | 238,559,857 | 2 | 2 | 4 | 0 |
| Case 44 | 1 | 238,560,794 | 238,598,399 | 2 | 0 | 2 | 1 |
| Case 44 | 1 | 238,613,141 | 238,785,675 | 2 | 2 | 4 | 0 |
| Case 44 | 1 | 238,786,017 | 239,057,708 | 2 | 0 | 2 | 1 |
| Case 44 | 1 | 239,058,330 | 239,094,157 | 3 | 0 | 3 | 1 |
| Case 44 | 1 | 239,094,695 | 239,128,572 | 2 | 2 | 4 | 0 |
| Case 44 | 1 | 239,141,583 | 239,179,054 | 2 | 0 | 2 | 1 |
| Case 44 | 1 | 239,184,346 | 239,945,157 | 2 | 2 | 4 | 0 |
| Case 44 | 1 | 239,946,076 | 239,981,643 | 2 | 0 | 2 | 1 |
| Case 44 | 1 | 239,982,638 | 239,985,876 | 2 | 2 | 4 | 0 |
| Case 44 | 1 | 239,988,849 | 240,371,925 | 2 | 0 | 2 | 1 |
| Case 44 | 1 | 240,373,569 | 240,937,073 | 2 | 2 | 4 | 0 |
| Case 44 | 1 | 240,939,391 | 241,433,465 | 2 | 0 | 2 | 1 |
| Case 44 | 1 | 241,433,847 | 241,753,546 | 3 | 0 | 3 | 1 |
| Case 44 | 1 | 241,755,320 | 244,534,781 | 2 | 0 | 2 | 1 |
| Case 44 | 1 | 244,538,684 | 244,724,277 | 3 | 0 | 3 | 1 |
| Case 44 | 1 | 244,735,812 | 246,054,787 | 2 | 0 | 2 | 1 |
| Case 44 | 1 | 246,058,909 | 246,414,404 | 2 | 2 | 4 | 0 |
| Case 44 | 1 | 246,425,984 | 246,618,945 | 3 | 0 | 3 | 1 |
| Case 44 | 1 | 246,622,814 | 246,829,873 | 2 | 0 | 2 | 1 |
| Case 44 | 1 | 246,830,293 | 247,491,143 | 2 | 2 | 4 | 0 |
| Case 44 | 1 | 247,492,078 | 248,577,691 | 2 | 0 | 2 | 1 |
| Case 44 | 1 | 248,578,622 | 248,688,317 | 2 | 2 | 4 | 0 |
| Case 44 | 1 | 248,756,502 | 248,790,425 | 2 | 0 | 2 | 1 |
| Case 44 | 1 | 248,801,588 | 249,174,682 | 2 | 2 | 4 | 0 |
| Case 44 | 1 | 249,179,856 | 249,218,992 | 2 | 1 | 3 | 0 |
| Case 44 | 2 | 18,674      | 10,050,877  | 2 | 1 | 3 | 0 |
| Case 44 | 2 | 10,050,889  | 10,116,236  | 3 | 1 | 4 | 0 |
| Case 44 | 2 | 10,117,868  | 10,175,442  | 4 | 1 | 5 | 0 |
| Case 44 | 2 | 10,177,158  | 42,419,829  | 2 | 1 | 3 | 0 |
| Case 44 | 2 | 42,420,599  | 42,544,584  | 2 | 2 | 4 | 0 |
| Case 44 | 2 | 42,553,315  | 64,680,967  | 2 | 1 | 3 | 0 |
| Case 44 | 2 | 64,682,532  | 64,778,730  | 3 | 1 | 4 | 0 |
| Case 44 | 2 | 64,778,749  | 92,081,640  | 2 | 1 | 3 | 0 |
| Case 44 | 2 | 95,429,424  | 190,541,743 | 2 | 1 | 3 | 0 |
| Case 44 | 2 | 190,541,807 | 190,611,307 | 2 | 2 | 4 | 0 |
| Case 44 | 2 | 190,612,339 | 201,434,409 | 2 | 1 | 3 | 0 |
| Case 44 | 2 | 201,434,523 | 201,440,089 | 2 | 2 | 4 | 0 |
| Case 44 | 2 | 201,440,299 | 202,400,872 | 2 | 1 | 3 | 0 |
| Case 44 | 2 | 202,400,884 | 202,489,109 | 2 | 2 | 4 | 0 |
| Case 44 | 2 | 202,490,812 | 243,048,760 | 2 | 1 | 3 | 0 |
| Case 44 | 3 | 61,495      | 289,311     | 3 | 0 | 3 | 1 |
| Case 44 | 3 | 292,992     | 89,390,170  | 2 | 1 | 3 | 0 |
| Case 44 | 3 | 89,391,064  | 89,391,064  | 2 | 0 | 2 | 1 |
| Case 44 | 3 | 89,402,447  | 89,417,064  | 1 | 0 | 1 | 0 |
| Case 44 | 3 | 89,417,171  | 89,417,171  | 2 | 0 | 2 | 1 |
| Case 44 | 3 | 89,443,784  | 90,442,925  | 2 | 1 | 3 | 0 |

|         |   |             |             |   |   |   |   |
|---------|---|-------------|-------------|---|---|---|---|
| Case 44 | 3 | 93,537,290  | 93,545,404  | 2 | 1 | 3 | 0 |
| Case 44 | 3 | 93,546,445  | 95,270,483  | 2 | 2 | 4 | 0 |
| Case 44 | 3 | 95,281,021  | 98,250,215  | 6 | 1 | 7 | 0 |
| Case 44 | 3 | 98,250,986  | 98,255,392  | 4 | 1 | 5 | 0 |
| Case 44 | 3 | 98,261,658  | 99,483,773  | 6 | 1 | 7 | 0 |
| Case 44 | 3 | 99,494,215  | 102,067,254 | 2 | 2 | 4 | 0 |
| Case 44 | 3 | 102,093,452 | 102,372,037 | 3 | 0 | 3 | 1 |
| Case 44 | 3 | 102,386,156 | 104,032,299 | 2 | 0 | 2 | 1 |
| Case 44 | 3 | 104,052,812 | 119,131,303 | 2 | 2 | 4 | 0 |
| Case 44 | 3 | 119,132,554 | 119,141,369 | 2 | 1 | 3 | 0 |
| Case 44 | 3 | 119,141,643 | 119,497,045 | 2 | 2 | 4 | 0 |
| Case 44 | 3 | 119,497,811 | 119,536,897 | 2 | 1 | 3 | 0 |
| Case 44 | 3 | 119,537,223 | 121,335,146 | 2 | 2 | 4 | 0 |
| Case 44 | 3 | 121,335,461 | 121,394,749 | 2 | 1 | 3 | 0 |
| Case 44 | 3 | 121,395,795 | 121,705,842 | 2 | 2 | 4 | 0 |
| Case 44 | 3 | 121,706,021 | 121,713,121 | 2 | 1 | 3 | 0 |
| Case 44 | 3 | 121,715,319 | 123,367,885 | 2 | 2 | 4 | 0 |
| Case 44 | 3 | 123,371,973 | 123,458,839 | 2 | 1 | 3 | 0 |
| Case 44 | 3 | 123,463,708 | 125,726,016 | 2 | 2 | 4 | 0 |
| Case 44 | 3 | 125,727,080 | 125,873,404 | 2 | 1 | 3 | 0 |
| Case 44 | 3 | 125,875,579 | 126,216,386 | 2 | 2 | 4 | 0 |
| Case 44 | 3 | 126,216,566 | 126,680,355 | 2 | 1 | 3 | 0 |
| Case 44 | 3 | 126,685,000 | 127,262,757 | 2 | 2 | 4 | 0 |
| Case 44 | 3 | 127,264,909 | 127,407,753 | 2 | 1 | 3 | 0 |
| Case 44 | 3 | 127,408,909 | 131,068,567 | 2 | 2 | 4 | 0 |
| Case 44 | 3 | 131,068,578 | 131,102,776 | 2 | 1 | 3 | 0 |
| Case 44 | 3 | 131,104,016 | 133,647,163 | 2 | 2 | 4 | 0 |
| Case 44 | 3 | 133,647,212 | 133,759,848 | 2 | 1 | 3 | 0 |
| Case 44 | 3 | 133,760,537 | 140,229,445 | 2 | 2 | 4 | 0 |
| Case 44 | 3 | 140,241,720 | 140,299,603 | 2 | 1 | 3 | 0 |
| Case 44 | 3 | 140,305,484 | 140,397,413 | 2 | 2 | 4 | 0 |
| Case 44 | 3 | 140,399,199 | 140,459,247 | 2 | 1 | 3 | 0 |
| Case 44 | 3 | 140,466,634 | 147,063,796 | 2 | 2 | 4 | 0 |
| Case 44 | 3 | 147,066,342 | 147,142,513 | 2 | 1 | 3 | 0 |
| Case 44 | 3 | 147,144,318 | 151,154,923 | 2 | 2 | 4 | 0 |
| Case 44 | 3 | 151,155,090 | 151,171,534 | 2 | 1 | 3 | 0 |
| Case 44 | 3 | 151,171,535 | 184,039,304 | 2 | 2 | 4 | 0 |
| Case 44 | 3 | 184,039,373 | 184,080,327 | 2 | 1 | 3 | 0 |
| Case 44 | 3 | 184,084,846 | 194,061,561 | 2 | 2 | 4 | 0 |
| Case 44 | 3 | 194,061,578 | 194,124,421 | 2 | 1 | 3 | 0 |
| Case 44 | 3 | 194,126,767 | 195,295,166 | 2 | 2 | 4 | 0 |
| Case 44 | 3 | 195,295,782 | 195,609,069 | 2 | 1 | 3 | 0 |
| Case 44 | 3 | 195,609,162 | 196,674,177 | 2 | 2 | 4 | 0 |
| Case 44 | 3 | 196,674,182 | 196,751,341 | 2 | 1 | 3 | 0 |
| Case 44 | 3 | 196,753,355 | 197,838,262 | 2 | 2 | 4 | 0 |
| Case 44 | 4 | 71,566      | 1,347,144   | 2 | 0 | 2 | 1 |
| Case 44 | 4 | 1,347,675   | 1,705,399   | 3 | 0 | 3 | 1 |
| Case 44 | 4 | 1,707,447   | 2,172,847   | 2 | 0 | 2 | 1 |
| Case 44 | 4 | 2,176,454   | 2,249,111   | 3 | 0 | 3 | 1 |
| Case 44 | 4 | 2,250,109   | 2,332,705   | 2 | 0 | 2 | 1 |
| Case 44 | 4 | 2,335,396   | 2,703,081   | 3 | 0 | 3 | 1 |
| Case 44 | 4 | 2,703,101   | 2,939,018   | 2 | 0 | 2 | 1 |
| Case 44 | 4 | 2,940,916   | 3,029,694   | 3 | 0 | 3 | 1 |
| Case 44 | 4 | 3,030,097   | 5,742,400   | 2 | 0 | 2 | 1 |
| Case 44 | 4 | 5,743,053   | 5,753,249   | 3 | 0 | 3 | 1 |
| Case 44 | 4 | 5,753,354   | 6,644,327   | 2 | 0 | 2 | 1 |
| Case 44 | 4 | 6,645,597   | 6,903,159   | 3 | 0 | 3 | 1 |
| Case 44 | 4 | 6,904,074   | 7,774,681   | 2 | 0 | 2 | 1 |
| Case 44 | 4 | 7,774,707   | 7,980,298   | 3 | 0 | 3 | 1 |
| Case 44 | 4 | 7,980,652   | 15,512,919  | 2 | 0 | 2 | 1 |
| Case 44 | 4 | 15,512,942  | 15,738,253  | 3 | 0 | 3 | 1 |

|         |   |             |             |   |   |   |   |
|---------|---|-------------|-------------|---|---|---|---|
| Case 44 | 4 | 15,738,370  | 15,980,454  | 2 | 0 | 2 | 1 |
| Case 44 | 4 | 15,980,975  | 16,033,066  | 3 | 0 | 3 | 1 |
| Case 44 | 4 | 16,034,634  | 37,764,357  | 2 | 0 | 2 | 1 |
| Case 44 | 4 | 37,766,932  | 37,904,082  | 3 | 0 | 3 | 1 |
| Case 44 | 4 | 37,904,089  | 38,158,024  | 2 | 0 | 2 | 1 |
| Case 44 | 4 | 38,158,043  | 38,776,712  | 3 | 0 | 3 | 1 |
| Case 44 | 4 | 38,776,725  | 38,930,893  | 2 | 0 | 2 | 1 |
| Case 44 | 4 | 38,930,921  | 40,262,814  | 3 | 0 | 3 | 1 |
| Case 44 | 4 | 40,265,273  | 40,383,379  | 2 | 0 | 2 | 1 |
| Case 44 | 4 | 40,384,525  | 40,810,690  | 3 | 0 | 3 | 1 |
| Case 44 | 4 | 40,810,747  | 40,946,884  | 2 | 0 | 2 | 1 |
| Case 44 | 4 | 40,946,971  | 41,266,295  | 3 | 0 | 3 | 1 |
| Case 44 | 4 | 41,269,193  | 48,234,689  | 2 | 0 | 2 | 1 |
| Case 44 | 4 | 48,244,736  | 48,490,766  | 3 | 0 | 3 | 1 |
| Case 44 | 4 | 48,490,930  | 49,620,898  | 2 | 0 | 2 | 1 |
| Case 44 | 4 | 52,697,856  | 56,290,220  | 2 | 0 | 2 | 1 |
| Case 44 | 4 | 56,296,763  | 57,071,639  | 3 | 0 | 3 | 1 |
| Case 44 | 4 | 57,087,608  | 57,385,455  | 2 | 0 | 2 | 1 |
| Case 44 | 4 | 57,387,706  | 57,648,046  | 3 | 0 | 3 | 1 |
| Case 44 | 4 | 57,649,159  | 73,942,678  | 2 | 0 | 2 | 1 |
| Case 44 | 4 | 73,942,731  | 74,805,322  | 3 | 0 | 3 | 1 |
| Case 44 | 4 | 74,806,082  | 75,199,609  | 2 | 0 | 2 | 1 |
| Case 44 | 4 | 75,202,049  | 75,675,814  | 3 | 0 | 3 | 1 |
| Case 44 | 4 | 75,675,841  | 77,033,659  | 2 | 0 | 2 | 1 |
| Case 44 | 4 | 77,037,045  | 77,647,590  | 3 | 0 | 3 | 1 |
| Case 44 | 4 | 77,649,374  | 82,519,643  | 2 | 0 | 2 | 1 |
| Case 44 | 4 | 82,534,135  | 82,773,619  | 3 | 0 | 3 | 1 |
| Case 44 | 4 | 82,779,892  | 84,518,066  | 2 | 0 | 2 | 1 |
| Case 44 | 4 | 84,518,315  | 84,797,545  | 3 | 0 | 3 | 1 |
| Case 44 | 4 | 84,798,143  | 87,967,323  | 2 | 0 | 2 | 1 |
| Case 44 | 4 | 87,968,162  | 89,139,832  | 3 | 0 | 3 | 1 |
| Case 44 | 4 | 89,149,570  | 89,338,691  | 2 | 0 | 2 | 1 |
| Case 44 | 4 | 89,338,731  | 89,567,767  | 3 | 0 | 3 | 1 |
| Case 44 | 4 | 89,577,147  | 89,897,522  | 2 | 0 | 2 | 1 |
| Case 44 | 4 | 89,898,476  | 90,002,785  | 4 | 0 | 4 | 1 |
| Case 44 | 4 | 90,010,941  | 91,154,964  | 2 | 0 | 2 | 1 |
| Case 44 | 4 | 91,156,917  | 91,481,271  | 0 | 0 | 0 | 0 |
| Case 44 | 4 | 91,490,629  | 95,120,289  | 2 | 0 | 2 | 1 |
| Case 44 | 4 | 95,129,699  | 96,033,978  | 3 | 0 | 3 | 1 |
| Case 44 | 4 | 96,035,956  | 96,307,840  | 2 | 0 | 2 | 1 |
| Case 44 | 4 | 96,309,211  | 96,597,286  | 3 | 0 | 3 | 1 |
| Case 44 | 4 | 96,600,219  | 102,726,005 | 2 | 0 | 2 | 1 |
| Case 44 | 4 | 102,726,073 | 102,883,425 | 3 | 0 | 3 | 1 |
| Case 44 | 4 | 102,893,323 | 106,106,353 | 2 | 0 | 2 | 1 |
| Case 44 | 4 | 106,108,902 | 106,325,106 | 3 | 0 | 3 | 1 |
| Case 44 | 4 | 106,335,490 | 112,922,517 | 2 | 0 | 2 | 1 |
| Case 44 | 4 | 112,923,237 | 113,247,435 | 3 | 0 | 3 | 1 |
| Case 44 | 4 | 113,248,536 | 115,030,276 | 2 | 0 | 2 | 1 |
| Case 44 | 4 | 115,041,483 | 115,316,659 | 3 | 0 | 3 | 1 |
| Case 44 | 4 | 115,316,768 | 123,771,828 | 2 | 0 | 2 | 1 |
| Case 44 | 4 | 123,772,018 | 124,322,952 | 3 | 0 | 3 | 1 |
| Case 44 | 4 | 124,323,155 | 125,017,034 | 2 | 0 | 2 | 1 |
| Case 44 | 4 | 125,020,390 | 125,268,531 | 3 | 0 | 3 | 1 |
| Case 44 | 4 | 125,280,852 | 128,802,306 | 2 | 0 | 2 | 1 |
| Case 44 | 4 | 128,803,159 | 128,867,612 | 3 | 0 | 3 | 1 |
| Case 44 | 4 | 128,878,744 | 140,165,548 | 2 | 0 | 2 | 1 |
| Case 44 | 4 | 140,165,770 | 140,417,471 | 3 | 0 | 3 | 1 |
| Case 44 | 4 | 140,420,250 | 158,697,324 | 2 | 0 | 2 | 1 |
| Case 44 | 4 | 158,704,610 | 159,086,166 | 3 | 0 | 3 | 1 |
| Case 44 | 4 | 159,089,861 | 183,504,017 | 2 | 0 | 2 | 1 |
| Case 44 | 4 | 183,506,166 | 183,594,275 | 3 | 0 | 3 | 1 |

|         |   |             |             |   |   |   |   |
|---------|---|-------------|-------------|---|---|---|---|
| Case 44 | 4 | 183,594,938 | 183,880,034 | 2 | 0 | 2 | 1 |
| Case 44 | 4 | 183,880,263 | 184,192,386 | 3 | 0 | 3 | 1 |
| Case 44 | 4 | 184,196,516 | 184,529,969 | 2 | 0 | 2 | 1 |
| Case 44 | 4 | 184,530,109 | 184,629,680 | 3 | 0 | 3 | 1 |
| Case 44 | 4 | 184,629,794 | 185,023,826 | 2 | 0 | 2 | 1 |
| Case 44 | 4 | 185,024,257 | 185,637,699 | 3 | 0 | 3 | 1 |
| Case 44 | 4 | 185,638,307 | 186,180,187 | 2 | 0 | 2 | 1 |
| Case 44 | 4 | 186,185,293 | 186,388,073 | 3 | 0 | 3 | 1 |
| Case 44 | 4 | 186,390,753 | 187,538,330 | 2 | 0 | 2 | 1 |
| Case 44 | 4 | 187,538,942 | 187,554,849 | 3 | 0 | 3 | 1 |
| Case 44 | 4 | 187,555,387 | 187,629,770 | 2 | 0 | 2 | 1 |
| Case 44 | 4 | 187,629,838 | 187,860,363 | 3 | 0 | 3 | 1 |
| Case 44 | 4 | 187,864,673 | 190,963,766 | 2 | 0 | 2 | 1 |
| Case 44 | 5 | 38,139      | 314,554     | 3 | 0 | 3 | 1 |
| Case 44 | 5 | 314,935     | 2,627,075   | 4 | 0 | 4 | 1 |
| Case 44 | 5 | 2,627,545   | 2,767,357   | 3 | 0 | 3 | 1 |
| Case 44 | 5 | 2,767,527   | 3,019,005   | 4 | 0 | 4 | 1 |
| Case 44 | 5 | 3,025,452   | 3,890,330   | 3 | 0 | 3 | 1 |
| Case 44 | 5 | 3,891,796   | 5,235,264   | 4 | 0 | 4 | 1 |
| Case 44 | 5 | 5,236,356   | 5,560,070   | 3 | 0 | 3 | 1 |
| Case 44 | 5 | 5,566,984   | 5,624,937   | 4 | 0 | 4 | 1 |
| Case 44 | 5 | 5,628,443   | 6,604,329   | 3 | 0 | 3 | 1 |
| Case 44 | 5 | 6,604,787   | 7,424,672   | 4 | 0 | 4 | 1 |
| Case 44 | 5 | 7,425,788   | 7,837,861   | 3 | 0 | 3 | 1 |
| Case 44 | 5 | 7,838,085   | 8,904,380   | 4 | 0 | 4 | 1 |
| Case 44 | 5 | 8,906,784   | 9,209,831   | 3 | 0 | 3 | 1 |
| Case 44 | 5 | 9,215,068   | 33,839,309  | 4 | 0 | 4 | 1 |
| Case 44 | 5 | 33,839,978  | 33,946,143  | 3 | 0 | 3 | 1 |
| Case 44 | 5 | 33,946,555  | 38,399,208  | 4 | 0 | 4 | 1 |
| Case 44 | 5 | 38,400,072  | 38,493,782  | 3 | 0 | 3 | 1 |
| Case 44 | 5 | 38,493,801  | 39,341,264  | 4 | 0 | 4 | 1 |
| Case 44 | 5 | 39,341,303  | 39,418,421  | 3 | 0 | 3 | 1 |
| Case 44 | 5 | 39,418,887  | 46,117,770  | 4 | 0 | 4 | 1 |
| Case 44 | 5 | 46,127,095  | 46,399,093  | 3 | 0 | 3 | 1 |
| Case 44 | 5 | 49,457,282  | 54,398,085  | 2 | 0 | 2 | 1 |
| Case 44 | 5 | 54,398,580  | 54,458,763  | 3 | 0 | 3 | 1 |
| Case 44 | 5 | 54,459,961  | 54,558,510  | 2 | 0 | 2 | 1 |
| Case 44 | 5 | 54,561,643  | 55,204,174  | 3 | 0 | 3 | 1 |
| Case 44 | 5 | 55,204,187  | 55,407,449  | 2 | 0 | 2 | 1 |
| Case 44 | 5 | 55,407,523  | 55,968,018  | 3 | 0 | 3 | 1 |
| Case 44 | 5 | 55,970,422  | 58,558,388  | 2 | 0 | 2 | 1 |
| Case 44 | 5 | 58,558,595  | 58,698,524  | 3 | 0 | 3 | 1 |
| Case 44 | 5 | 58,704,650  | 61,728,012  | 2 | 0 | 2 | 1 |
| Case 44 | 5 | 61,733,348  | 61,856,986  | 3 | 0 | 3 | 1 |
| Case 44 | 5 | 61,857,063  | 64,548,634  | 2 | 0 | 2 | 1 |
| Case 44 | 5 | 64,551,463  | 65,580,717  | 3 | 0 | 3 | 1 |
| Case 44 | 5 | 65,583,098  | 68,411,954  | 2 | 0 | 2 | 1 |
| Case 44 | 5 | 68,412,319  | 70,704,077  | 3 | 0 | 3 | 1 |
| Case 44 | 5 | 70,709,459  | 70,754,475  | 2 | 0 | 2 | 1 |
| Case 44 | 5 | 70,754,567  | 70,900,270  | 3 | 0 | 3 | 1 |
| Case 44 | 5 | 70,912,681  | 72,173,169  | 2 | 0 | 2 | 1 |
| Case 44 | 5 | 72,177,890  | 72,387,486  | 3 | 0 | 3 | 1 |
| Case 44 | 5 | 72,400,190  | 72,650,185  | 2 | 0 | 2 | 1 |
| Case 44 | 5 | 72,654,304  | 74,262,980  | 3 | 0 | 3 | 1 |
| Case 44 | 5 | 74,263,455  | 74,675,717  | 2 | 0 | 2 | 1 |
| Case 44 | 5 | 74,676,823  | 74,972,877  | 3 | 0 | 3 | 1 |
| Case 44 | 5 | 74,976,105  | 75,738,858  | 2 | 0 | 2 | 1 |
| Case 44 | 5 | 75,741,242  | 76,092,225  | 3 | 0 | 3 | 1 |
| Case 44 | 5 | 76,092,687  | 79,741,133  | 2 | 0 | 2 | 1 |
| Case 44 | 5 | 79,741,168  | 79,854,441  | 3 | 0 | 3 | 1 |
| Case 44 | 5 | 79,854,586  | 79,952,154  | 2 | 0 | 2 | 1 |

|         |   |             |             |   |   |   |   |
|---------|---|-------------|-------------|---|---|---|---|
| Case 44 | 5 | 79,952,308  | 80,219,978  | 3 | 0 | 3 | 1 |
| Case 44 | 5 | 80,220,759  | 82,201,161  | 2 | 0 | 2 | 1 |
| Case 44 | 5 | 82,202,898  | 82,649,057  | 3 | 0 | 3 | 1 |
| Case 44 | 5 | 82,656,114  | 94,988,888  | 2 | 0 | 2 | 1 |
| Case 44 | 5 | 94,989,940  | 95,091,352  | 3 | 0 | 3 | 1 |
| Case 44 | 5 | 95,093,084  | 96,082,087  | 2 | 0 | 2 | 1 |
| Case 44 | 5 | 96,082,125  | 96,112,107  | 3 | 0 | 3 | 1 |
| Case 44 | 5 | 96,112,168  | 115,469,773 | 2 | 0 | 2 | 1 |
| Case 44 | 5 | 115,469,825 | 115,633,474 | 3 | 0 | 3 | 1 |
| Case 44 | 5 | 115,641,393 | 125,971,811 | 2 | 0 | 2 | 1 |
| Case 44 | 5 | 125,971,812 | 127,543,622 | 3 | 0 | 3 | 1 |
| Case 44 | 5 | 127,548,700 | 130,498,228 | 2 | 0 | 2 | 1 |
| Case 44 | 5 | 130,505,761 | 130,726,763 | 3 | 0 | 3 | 1 |
| Case 44 | 5 | 130,728,888 | 131,867,702 | 2 | 0 | 2 | 1 |
| Case 44 | 5 | 131,867,835 | 131,973,177 | 3 | 0 | 3 | 1 |
| Case 44 | 5 | 131,977,907 | 132,024,166 | 2 | 0 | 2 | 1 |
| Case 44 | 5 | 132,032,369 | 132,074,695 | 3 | 0 | 3 | 1 |
| Case 44 | 5 | 132,083,209 | 132,197,442 | 2 | 0 | 2 | 1 |
| Case 44 | 5 | 132,197,518 | 132,533,135 | 3 | 0 | 3 | 1 |
| Case 44 | 5 | 132,533,517 | 133,256,102 | 2 | 0 | 2 | 1 |
| Case 44 | 5 | 133,260,485 | 133,451,611 | 3 | 0 | 3 | 1 |
| Case 44 | 5 | 133,451,615 | 135,236,015 | 2 | 0 | 2 | 1 |
| Case 44 | 5 | 135,236,294 | 135,282,514 | 3 | 0 | 3 | 1 |
| Case 44 | 5 | 135,283,122 | 139,267,029 | 2 | 0 | 2 | 1 |
| Case 44 | 5 | 139,267,090 | 139,697,220 | 3 | 0 | 3 | 1 |
| Case 44 | 5 | 139,708,382 | 140,182,722 | 2 | 0 | 2 | 1 |
| Case 44 | 5 | 140,182,777 | 140,236,703 | 3 | 0 | 3 | 1 |
| Case 44 | 5 | 140,236,732 | 141,888,038 | 2 | 0 | 2 | 1 |
| Case 44 | 5 | 141,888,881 | 142,384,160 | 3 | 0 | 3 | 1 |
| Case 44 | 5 | 142,393,562 | 145,483,703 | 2 | 0 | 2 | 1 |
| Case 44 | 5 | 145,483,756 | 145,668,298 | 3 | 0 | 3 | 1 |
| Case 44 | 5 | 145,677,418 | 149,276,279 | 2 | 0 | 2 | 1 |
| Case 44 | 5 | 149,276,567 | 149,374,518 | 3 | 0 | 3 | 1 |
| Case 44 | 5 | 149,374,585 | 150,058,785 | 2 | 0 | 2 | 1 |
| Case 44 | 5 | 150,060,364 | 150,372,547 | 3 | 0 | 3 | 1 |
| Case 44 | 5 | 150,372,984 | 154,282,692 | 2 | 0 | 2 | 1 |
| Case 44 | 5 | 154,282,717 | 154,346,305 | 3 | 0 | 3 | 1 |
| Case 44 | 5 | 154,346,390 | 159,804,039 | 2 | 0 | 2 | 1 |
| Case 44 | 5 | 159,818,125 | 159,967,244 | 3 | 0 | 3 | 1 |
| Case 44 | 5 | 159,972,064 | 171,301,328 | 2 | 0 | 2 | 1 |
| Case 44 | 5 | 171,303,382 | 180,693,127 | 3 | 0 | 3 | 1 |
| Case 44 | 6 | 108,666     | 1,169,198   | 2 | 0 | 2 | 1 |
| Case 44 | 6 | 1,185,373   | 1,308,164   | 3 | 0 | 3 | 1 |
| Case 44 | 6 | 1,309,171   | 1,954,508   | 2 | 0 | 2 | 1 |
| Case 44 | 6 | 1,955,398   | 2,563,775   | 3 | 0 | 3 | 1 |
| Case 44 | 6 | 2,565,752   | 2,670,633   | 2 | 0 | 2 | 1 |
| Case 44 | 6 | 2,671,994   | 3,000,303   | 3 | 0 | 3 | 1 |
| Case 44 | 6 | 3,002,238   | 4,020,528   | 2 | 0 | 2 | 1 |
| Case 44 | 6 | 4,022,611   | 4,131,101   | 3 | 0 | 3 | 1 |
| Case 44 | 6 | 4,133,855   | 10,709,075  | 2 | 0 | 2 | 1 |
| Case 44 | 6 | 10,709,190  | 10,874,407  | 3 | 0 | 3 | 1 |
| Case 44 | 6 | 10,874,451  | 11,327,021  | 2 | 0 | 2 | 1 |
| Case 44 | 6 | 11,327,832  | 11,637,483  | 3 | 0 | 3 | 1 |
| Case 44 | 6 | 11,639,524  | 16,842,262  | 2 | 0 | 2 | 1 |
| Case 44 | 6 | 16,842,482  | 16,948,451  | 3 | 0 | 3 | 1 |
| Case 44 | 6 | 16,948,558  | 17,249,496  | 2 | 0 | 2 | 1 |
| Case 44 | 6 | 17,250,282  | 17,529,407  | 3 | 0 | 3 | 1 |
| Case 44 | 6 | 17,535,126  | 25,435,822  | 2 | 0 | 2 | 1 |
| Case 44 | 6 | 25,436,325  | 25,605,058  | 3 | 0 | 3 | 1 |
| Case 44 | 6 | 25,605,091  | 25,646,145  | 2 | 0 | 2 | 1 |
| Case 44 | 6 | 25,652,225  | 25,727,204  | 3 | 0 | 3 | 1 |



|         |   |             |             |   |   |   |   |
|---------|---|-------------|-------------|---|---|---|---|
| Case 44 | 6 | 25,727,213  | 28,584,775  | 2 | 0 | 2 | 1 |
| Case 44 | 6 | 28,586,694  | 28,784,106  | 3 | 0 | 3 | 1 |
| Case 44 | 6 | 28,784,396  | 29,406,696  | 2 | 2 | 4 | 0 |
| Case 44 | 6 | 29,407,378  | 29,527,599  | 2 | 1 | 3 | 0 |
| Case 44 | 6 | 29,528,318  | 29,545,208  | 2 | 2 | 4 | 0 |
| Case 44 | 6 | 29,545,284  | 29,801,110  | 3 | 0 | 3 | 1 |
| Case 44 | 6 | 29,801,474  | 29,879,529  | 4 | 0 | 4 | 1 |
| Case 44 | 6 | 29,896,421  | 29,935,372  | 3 | 0 | 3 | 1 |
| Case 44 | 6 | 29,935,469  | 30,483,919  | 4 | 0 | 4 | 1 |
| Case 44 | 6 | 30,486,456  | 30,551,785  | 3 | 0 | 3 | 1 |
| Case 44 | 6 | 30,552,053  | 30,587,699  | 2 | 2 | 4 | 0 |
| Case 44 | 6 | 30,592,414  | 30,680,595  | 2 | 1 | 3 | 0 |
| Case 44 | 6 | 30,680,608  | 31,079,417  | 2 | 2 | 4 | 0 |
| Case 44 | 6 | 31,079,643  | 31,093,066  | 2 | 1 | 3 | 0 |
| Case 44 | 6 | 31,093,190  | 31,337,633  | 2 | 2 | 4 | 0 |
| Case 44 | 6 | 31,338,528  | 31,341,357  | 2 | 0 | 2 | 1 |
| Case 44 | 6 | 31,342,484  | 31,922,356  | 2 | 2 | 4 | 0 |
| Case 44 | 6 | 31,922,453  | 32,187,516  | 2 | 1 | 3 | 0 |
| Case 44 | 6 | 32,187,605  | 32,252,678  | 2 | 2 | 4 | 0 |
| Case 44 | 6 | 32,254,452  | 33,037,453  | 2 | 1 | 3 | 0 |
| Case 44 | 6 | 33,037,454  | 33,429,672  | 3 | 0 | 3 | 1 |
| Case 44 | 6 | 33,429,952  | 33,957,134  | 2 | 1 | 3 | 0 |
| Case 44 | 6 | 33,960,611  | 35,727,655  | 2 | 2 | 4 | 0 |
| Case 44 | 6 | 35,730,950  | 35,765,043  | 2 | 0 | 2 | 1 |
| Case 44 | 6 | 35,773,490  | 36,065,185  | 3 | 2 | 5 | 0 |
| Case 44 | 6 | 36,070,955  | 36,368,265  | 3 | 1 | 4 | 0 |
| Case 44 | 6 | 36,370,254  | 36,708,821  | 3 | 2 | 5 | 0 |
| Case 44 | 6 | 36,710,109  | 37,767,685  | 3 | 1 | 4 | 0 |
| Case 44 | 6 | 37,767,791  | 38,953,292  | 3 | 2 | 5 | 0 |
| Case 44 | 6 | 38,954,145  | 39,520,106  | 2 | 2 | 4 | 0 |
| Case 44 | 6 | 39,523,281  | 39,648,685  | 3 | 2 | 5 | 0 |
| Case 44 | 6 | 39,653,406  | 42,388,625  | 2 | 2 | 4 | 0 |
| Case 44 | 6 | 42,399,074  | 42,665,888  | 3 | 2 | 5 | 0 |
| Case 44 | 6 | 42,666,061  | 44,525,198  | 2 | 2 | 4 | 0 |
| Case 44 | 6 | 44,525,215  | 56,722,235  | 2 | 1 | 3 | 0 |
| Case 44 | 6 | 56,726,819  | 58,752,089  | 2 | 2 | 4 | 0 |
| Case 44 | 6 | 61,891,118  | 80,016,681  | 2 | 2 | 4 | 0 |
| Case 44 | 6 | 80,018,505  | 84,304,096  | 2 | 0 | 2 | 1 |
| Case 44 | 6 | 84,313,180  | 84,428,280  | 3 | 0 | 3 | 1 |
| Case 44 | 6 | 84,437,425  | 84,859,300  | 2 | 0 | 2 | 1 |
| Case 44 | 6 | 84,862,511  | 85,043,476  | 3 | 0 | 3 | 1 |
| Case 44 | 6 | 85,043,919  | 85,800,575  | 2 | 0 | 2 | 1 |
| Case 44 | 6 | 85,802,566  | 86,106,092  | 3 | 0 | 3 | 1 |
| Case 44 | 6 | 86,111,138  | 100,964,063 | 2 | 0 | 2 | 1 |
| Case 44 | 6 | 100,964,147 | 101,296,389 | 3 | 0 | 3 | 1 |
| Case 44 | 6 | 101,296,420 | 106,244,548 | 2 | 0 | 2 | 1 |
| Case 44 | 6 | 106,244,980 | 106,321,844 | 3 | 0 | 3 | 1 |
| Case 44 | 6 | 106,322,750 | 107,098,989 | 2 | 0 | 2 | 1 |
| Case 44 | 6 | 107,099,191 | 107,266,807 | 3 | 0 | 3 | 1 |
| Case 44 | 6 | 107,272,331 | 107,481,880 | 2 | 0 | 2 | 1 |
| Case 44 | 6 | 107,482,956 | 107,923,767 | 3 | 0 | 3 | 1 |
| Case 44 | 6 | 107,925,649 | 108,558,280 | 2 | 0 | 2 | 1 |
| Case 44 | 6 | 108,561,974 | 109,274,381 | 3 | 0 | 3 | 1 |
| Case 44 | 6 | 109,274,497 | 109,292,736 | 2 | 0 | 2 | 1 |
| Case 44 | 6 | 109,294,590 | 109,579,723 | 3 | 0 | 3 | 1 |
| Case 44 | 6 | 109,583,186 | 109,885,396 | 2 | 0 | 2 | 1 |
| Case 44 | 6 | 109,885,417 | 110,107,636 | 3 | 0 | 3 | 1 |
| Case 44 | 6 | 110,108,855 | 111,986,794 | 2 | 0 | 2 | 1 |
| Case 44 | 6 | 111,991,321 | 112,463,333 | 3 | 0 | 3 | 1 |
| Case 44 | 6 | 112,463,419 | 131,150,127 | 2 | 0 | 2 | 1 |
| Case 44 | 6 | 131,152,851 | 131,637,690 | 3 | 0 | 3 | 1 |

|         |   |             |             |   |   |   |   |
|---------|---|-------------|-------------|---|---|---|---|
| Case 44 | 6 | 131,638,681 | 132,611,762 | 2 | 0 | 2 | 1 |
| Case 44 | 6 | 132,617,072 | 132,890,341 | 2 | 2 | 4 | 0 |
| Case 44 | 6 | 132,891,501 | 132,910,710 | 2 | 1 | 3 | 0 |
| Case 44 | 6 | 132,912,612 | 133,126,220 | 2 | 2 | 4 | 0 |
| Case 44 | 6 | 133,132,500 | 133,396,241 | 2 | 1 | 3 | 0 |
| Case 44 | 6 | 133,396,480 | 148,839,982 | 2 | 2 | 4 | 0 |
| Case 44 | 6 | 148,840,713 | 148,869,370 | 2 | 1 | 3 | 0 |
| Case 44 | 6 | 148,869,462 | 151,670,172 | 2 | 2 | 4 | 0 |
| Case 44 | 6 | 151,670,199 | 151,674,887 | 2 | 1 | 3 | 0 |
| Case 44 | 6 | 151,677,358 | 152,570,971 | 2 | 2 | 4 | 0 |
| Case 44 | 6 | 152,576,731 | 152,737,859 | 2 | 1 | 3 | 0 |
| Case 44 | 6 | 152,738,143 | 154,319,802 | 2 | 2 | 4 | 0 |
| Case 44 | 6 | 154,323,909 | 154,437,252 | 2 | 1 | 3 | 0 |
| Case 44 | 6 | 154,441,864 | 158,412,519 | 2 | 2 | 4 | 0 |
| Case 44 | 6 | 158,412,832 | 158,517,034 | 2 | 1 | 3 | 0 |
| Case 44 | 6 | 158,517,193 | 160,872,151 | 2 | 2 | 4 | 0 |
| Case 44 | 6 | 160,872,609 | 161,213,047 | 3 | 0 | 3 | 1 |
| Case 44 | 6 | 161,216,608 | 161,305,715 | 4 | 0 | 4 | 1 |
| Case 44 | 6 | 161,315,130 | 161,363,919 | 3 | 0 | 3 | 1 |
| Case 44 | 6 | 161,368,268 | 161,513,091 | 2 | 2 | 4 | 0 |
| Case 44 | 6 | 161,519,381 | 161,818,326 | 2 | 1 | 3 | 0 |
| Case 44 | 6 | 161,824,515 | 163,788,191 | 2 | 2 | 4 | 0 |
| Case 44 | 6 | 163,789,838 | 164,091,657 | 2 | 1 | 3 | 0 |
| Case 44 | 6 | 164,092,291 | 165,703,524 | 2 | 2 | 4 | 0 |
| Case 44 | 6 | 165,706,473 | 165,722,345 | 2 | 1 | 3 | 0 |
| Case 44 | 6 | 165,723,066 | 167,549,536 | 2 | 2 | 4 | 0 |
| Case 44 | 6 | 167,549,755 | 167,754,551 | 2 | 1 | 3 | 0 |
| Case 44 | 6 | 167,754,661 | 169,555,623 | 2 | 2 | 4 | 0 |
| Case 44 | 6 | 169,556,108 | 169,727,601 | 2 | 1 | 3 | 0 |
| Case 44 | 6 | 169,731,432 | 170,980,171 | 2 | 2 | 4 | 0 |
| Case 44 | 7 | 44,935      | 3,990,657   | 2 | 2 | 4 | 0 |
| Case 44 | 7 | 3,991,439   | 4,224,124   | 2 | 1 | 3 | 0 |
| Case 44 | 7 | 4,224,833   | 4,760,696   | 2 | 2 | 4 | 0 |
| Case 44 | 7 | 4,765,018   | 4,874,251   | 2 | 1 | 3 | 0 |
| Case 44 | 7 | 4,874,407   | 15,880,136  | 2 | 2 | 4 | 0 |
| Case 44 | 7 | 15,881,354  | 15,883,805  | 2 | 0 | 2 | 1 |
| Case 44 | 7 | 15,884,675  | 39,833,350  | 2 | 2 | 4 | 0 |
| Case 44 | 7 | 39,849,482  | 41,441,549  | 3 | 2 | 5 | 0 |
| Case 44 | 7 | 41,448,792  | 42,278,116  | 3 | 1 | 4 | 0 |
| Case 44 | 7 | 42,281,481  | 42,668,807  | 3 | 2 | 5 | 0 |
| Case 44 | 7 | 42,671,386  | 43,158,219  | 3 | 1 | 4 | 0 |
| Case 44 | 7 | 43,158,477  | 43,821,453  | 3 | 2 | 5 | 0 |
| Case 44 | 7 | 43,827,414  | 44,193,404  | 3 | 1 | 4 | 0 |
| Case 44 | 7 | 44,204,322  | 44,412,735  | 3 | 2 | 5 | 0 |
| Case 44 | 7 | 44,420,901  | 45,267,645  | 3 | 1 | 4 | 0 |
| Case 44 | 7 | 45,268,198  | 45,539,170  | 3 | 2 | 5 | 0 |
| Case 44 | 7 | 45,540,450  | 46,034,024  | 3 | 1 | 4 | 0 |
| Case 44 | 7 | 46,041,100  | 47,276,175  | 3 | 2 | 5 | 0 |
| Case 44 | 7 | 47,278,232  | 48,153,838  | 3 | 1 | 4 | 0 |
| Case 44 | 7 | 48,155,507  | 48,481,370  | 3 | 2 | 5 | 0 |
| Case 44 | 7 | 48,494,883  | 48,930,555  | 2 | 2 | 4 | 0 |
| Case 44 | 7 | 48,941,456  | 49,454,996  | 3 | 2 | 5 | 0 |
| Case 44 | 7 | 49,460,153  | 53,691,133  | 2 | 2 | 4 | 0 |
| Case 44 | 7 | 53,694,790  | 54,098,497  | 3 | 2 | 5 | 0 |
| Case 44 | 7 | 54,108,381  | 55,700,256  | 2 | 2 | 4 | 0 |
| Case 44 | 7 | 55,703,387  | 56,074,118  | 3 | 2 | 5 | 0 |
| Case 44 | 7 | 56,075,218  | 57,375,221  | 2 | 2 | 4 | 0 |
| Case 44 | 7 | 57,376,120  | 58,019,061  | 2 | 1 | 3 | 0 |
| Case 44 | 7 | 61,056,053  | 63,385,883  | 2 | 1 | 3 | 0 |
| Case 44 | 7 | 63,387,484  | 63,568,418  | 2 | 2 | 4 | 0 |
| Case 44 | 7 | 63,581,769  | 63,962,963  | 3 | 0 | 3 | 1 |

|         |   |             |             |   |   |   |   |
|---------|---|-------------|-------------|---|---|---|---|
| Case 44 | 7 | 63,966,166  | 68,905,642  | 2 | 2 | 4 | 0 |
| Case 44 | 7 | 68,905,738  | 70,037,996  | 2 | 1 | 3 | 0 |
| Case 44 | 7 | 70,040,448  | 77,233,827  | 2 | 2 | 4 | 0 |
| Case 44 | 7 | 77,237,390  | 77,501,962  | 2 | 1 | 3 | 0 |
| Case 44 | 7 | 77,522,948  | 88,962,827  | 2 | 2 | 4 | 0 |
| Case 44 | 7 | 88,962,831  | 89,098,791  | 2 | 1 | 3 | 0 |
| Case 44 | 7 | 89,099,843  | 97,842,668  | 2 | 2 | 4 | 0 |
| Case 44 | 7 | 97,844,578  | 97,937,011  | 2 | 1 | 3 | 0 |
| Case 44 | 7 | 97,937,012  | 99,691,740  | 2 | 2 | 4 | 0 |
| Case 44 | 7 | 99,691,871  | 99,773,238  | 2 | 1 | 3 | 0 |
| Case 44 | 7 | 99,773,443  | 100,028,642 | 2 | 2 | 4 | 0 |
| Case 44 | 7 | 100,029,047 | 100,357,460 | 2 | 1 | 3 | 0 |
| Case 44 | 7 | 100,358,036 | 100,477,233 | 2 | 2 | 4 | 0 |
| Case 44 | 7 | 100,477,829 | 100,692,376 | 2 | 1 | 3 | 0 |
| Case 44 | 7 | 100,692,603 | 100,841,533 | 2 | 2 | 4 | 0 |
| Case 44 | 7 | 100,841,560 | 100,859,233 | 2 | 1 | 3 | 0 |
| Case 44 | 7 | 100,859,269 | 127,175,236 | 2 | 2 | 4 | 0 |
| Case 44 | 7 | 127,178,162 | 128,511,731 | 2 | 0 | 2 | 1 |
| Case 44 | 7 | 128,515,846 | 132,187,403 | 2 | 2 | 4 | 0 |
| Case 44 | 7 | 132,192,420 | 132,362,048 | 2 | 1 | 3 | 0 |
| Case 44 | 7 | 132,367,230 | 133,975,183 | 2 | 2 | 4 | 0 |
| Case 44 | 7 | 133,976,029 | 134,143,772 | 2 | 1 | 3 | 0 |
| Case 44 | 7 | 134,143,814 | 134,834,499 | 2 | 2 | 4 | 0 |
| Case 44 | 7 | 134,835,350 | 135,038,388 | 2 | 1 | 3 | 0 |
| Case 44 | 7 | 135,043,388 | 140,218,464 | 2 | 2 | 4 | 0 |
| Case 44 | 7 | 140,219,044 | 140,396,561 | 2 | 1 | 3 | 0 |
| Case 44 | 7 | 140,397,792 | 141,464,038 | 2 | 2 | 4 | 0 |
| Case 44 | 7 | 141,464,050 | 141,491,042 | 2 | 1 | 3 | 0 |
| Case 44 | 7 | 141,491,049 | 141,731,207 | 2 | 2 | 4 | 0 |
| Case 44 | 7 | 141,731,340 | 141,808,573 | 2 | 1 | 3 | 0 |
| Case 44 | 7 | 141,813,014 | 142,456,928 | 2 | 2 | 4 | 0 |
| Case 44 | 7 | 142,457,376 | 142,750,951 | 2 | 1 | 3 | 0 |
| Case 44 | 7 | 142,792,658 | 143,031,527 | 2 | 2 | 4 | 0 |
| Case 44 | 7 | 143,036,318 | 143,098,665 | 2 | 1 | 3 | 0 |
| Case 44 | 7 | 143,101,736 | 149,394,446 | 2 | 2 | 4 | 0 |
| Case 44 | 7 | 149,398,065 | 149,577,591 | 2 | 1 | 3 | 0 |
| Case 44 | 7 | 149,582,906 | 150,704,843 | 2 | 2 | 4 | 0 |
| Case 44 | 7 | 150,705,413 | 150,739,354 | 2 | 1 | 3 | 0 |
| Case 44 | 7 | 150,741,183 | 154,156,519 | 2 | 2 | 4 | 0 |
| Case 44 | 7 | 154,157,438 | 154,224,041 | 4 | 1 | 5 | 0 |
| Case 44 | 7 | 154,225,119 | 154,248,407 | 5 | 1 | 6 | 0 |
| Case 44 | 7 | 154,249,412 | 154,262,562 | 3 | 2 | 5 | 0 |
| Case 44 | 7 | 154,268,894 | 155,264,377 | 3 | 1 | 4 | 0 |
| Case 44 | 7 | 155,269,627 | 155,416,363 | 3 | 2 | 5 | 0 |
| Case 44 | 7 | 155,423,197 | 155,971,365 | 3 | 1 | 4 | 0 |
| Case 44 | 7 | 155,973,733 | 156,102,061 | 3 | 2 | 5 | 0 |
| Case 44 | 7 | 156,111,133 | 156,447,325 | 4 | 1 | 5 | 0 |
| Case 44 | 7 | 156,450,897 | 156,451,209 | 2 | 2 | 4 | 0 |
| Case 44 | 7 | 156,456,279 | 158,480,073 | 2 | 0 | 2 | 1 |
| Case 44 | 7 | 158,482,638 | 158,716,377 | 3 | 0 | 3 | 1 |
| Case 44 | 7 | 158,716,423 | 159,119,486 | 2 | 0 | 2 | 1 |
| Case 44 | 8 | 164,984     | 217,587     | 3 | 0 | 3 | 1 |
| Case 44 | 8 | 219,677     | 1,900,370   | 2 | 0 | 2 | 1 |
| Case 44 | 8 | 1,900,410   | 1,905,386   | 1 | 0 | 1 | 0 |
| Case 44 | 8 | 1,905,728   | 3,172,327   | 2 | 0 | 2 | 1 |
| Case 44 | 8 | 3,172,404   | 3,205,532   | 1 | 0 | 1 | 0 |
| Case 44 | 8 | 3,205,682   | 3,564,244   | 2 | 0 | 2 | 1 |
| Case 44 | 8 | 3,564,568   | 3,623,388   | 1 | 0 | 1 | 0 |
| Case 44 | 8 | 3,624,046   | 3,687,917   | 2 | 0 | 2 | 1 |
| Case 44 | 8 | 3,694,644   | 3,709,049   | 1 | 0 | 1 | 0 |
| Case 44 | 8 | 3,709,660   | 3,867,513   | 2 | 0 | 2 | 1 |

|         |   |            |            |   |   |   |   |
|---------|---|------------|------------|---|---|---|---|
| Case 44 | 8 | 3,867,760  | 4,002,031  | 1 | 0 | 1 | 0 |
| Case 44 | 8 | 4,002,653  | 4,070,415  | 2 | 0 | 2 | 1 |
| Case 44 | 8 | 4,070,495  | 4,101,558  | 1 | 0 | 1 | 0 |
| Case 44 | 8 | 4,103,130  | 4,451,048  | 2 | 0 | 2 | 1 |
| Case 44 | 8 | 4,453,036  | 4,481,209  | 1 | 0 | 1 | 0 |
| Case 44 | 8 | 4,481,250  | 4,811,010  | 2 | 0 | 2 | 1 |
| Case 44 | 8 | 4,811,455  | 4,824,577  | 1 | 0 | 1 | 0 |
| Case 44 | 8 | 4,826,467  | 10,466,128 | 2 | 0 | 2 | 1 |
| Case 44 | 8 | 10,466,152 | 10,467,207 | 1 | 0 | 1 | 0 |
| Case 44 | 8 | 10,467,248 | 10,468,172 | 2 | 0 | 2 | 1 |
| Case 44 | 8 | 10,468,310 | 10,470,805 | 1 | 0 | 1 | 0 |
| Case 44 | 8 | 10,470,915 | 10,526,742 | 2 | 0 | 2 | 1 |
| Case 44 | 8 | 10,527,144 | 10,555,350 | 1 | 0 | 1 | 0 |
| Case 44 | 8 | 10,555,734 | 11,301,550 | 2 | 0 | 2 | 1 |
| Case 44 | 8 | 11,301,601 | 11,301,857 | 1 | 0 | 1 | 0 |
| Case 44 | 8 | 11,302,445 | 11,695,970 | 2 | 0 | 2 | 1 |
| Case 44 | 8 | 11,696,115 | 11,702,653 | 1 | 0 | 1 | 0 |
| Case 44 | 8 | 11,702,705 | 12,545,638 | 2 | 0 | 2 | 1 |
| Case 44 | 8 | 12,551,156 | 12,594,526 | 1 | 0 | 1 | 0 |
| Case 44 | 8 | 12,594,637 | 14,037,030 | 2 | 0 | 2 | 1 |
| Case 44 | 8 | 14,037,301 | 14,164,118 | 1 | 0 | 1 | 0 |
| Case 44 | 8 | 14,168,180 | 14,767,473 | 2 | 0 | 2 | 1 |
| Case 44 | 8 | 14,768,548 | 14,844,324 | 1 | 0 | 1 | 0 |
| Case 44 | 8 | 14,848,938 | 14,951,436 | 2 | 0 | 2 | 1 |
| Case 44 | 8 | 14,951,943 | 15,051,158 | 1 | 0 | 1 | 0 |
| Case 44 | 8 | 15,051,872 | 15,752,089 | 2 | 0 | 2 | 1 |
| Case 44 | 8 | 15,752,275 | 15,849,729 | 1 | 0 | 1 | 0 |
| Case 44 | 8 | 15,853,724 | 17,674,988 | 2 | 0 | 2 | 1 |
| Case 44 | 8 | 17,681,402 | 17,755,571 | 4 | 0 | 4 | 1 |
| Case 44 | 8 | 17,756,133 | 17,937,364 | 3 | 0 | 3 | 1 |
| Case 44 | 8 | 17,937,530 | 18,787,784 | 2 | 0 | 2 | 1 |
| Case 44 | 8 | 18,787,795 | 18,866,368 | 3 | 0 | 3 | 1 |
| Case 44 | 8 | 18,870,349 | 22,138,953 | 2 | 0 | 2 | 1 |
| Case 44 | 8 | 22,140,656 | 22,386,479 | 3 | 0 | 3 | 1 |
| Case 44 | 8 | 22,388,857 | 23,647,494 | 2 | 0 | 2 | 1 |
| Case 44 | 8 | 23,649,551 | 23,695,903 | 3 | 0 | 3 | 1 |
| Case 44 | 8 | 23,696,543 | 26,122,035 | 2 | 0 | 2 | 1 |
| Case 44 | 8 | 26,124,172 | 26,288,526 | 3 | 0 | 3 | 1 |
| Case 44 | 8 | 26,290,268 | 28,986,357 | 2 | 0 | 2 | 1 |
| Case 44 | 8 | 28,992,540 | 29,453,239 | 3 | 0 | 3 | 1 |
| Case 44 | 8 | 29,454,051 | 29,718,019 | 2 | 0 | 2 | 1 |
| Case 44 | 8 | 29,731,466 | 30,042,658 | 3 | 0 | 3 | 1 |
| Case 44 | 8 | 30,060,304 | 30,695,111 | 2 | 0 | 2 | 1 |
| Case 44 | 8 | 30,695,438 | 30,703,691 | 3 | 0 | 3 | 1 |
| Case 44 | 8 | 30,703,724 | 30,849,740 | 2 | 0 | 2 | 1 |
| Case 44 | 8 | 30,853,102 | 31,030,535 | 3 | 0 | 3 | 1 |
| Case 44 | 8 | 31,030,599 | 36,939,390 | 2 | 0 | 2 | 1 |
| Case 44 | 8 | 36,939,955 | 37,096,059 | 3 | 0 | 3 | 1 |
| Case 44 | 8 | 37,098,052 | 37,968,336 | 2 | 0 | 2 | 1 |
| Case 44 | 8 | 37,976,368 | 38,260,136 | 3 | 0 | 3 | 1 |
| Case 44 | 8 | 38,260,815 | 38,855,847 | 2 | 0 | 2 | 1 |
| Case 44 | 8 | 38,858,484 | 39,678,652 | 3 | 0 | 3 | 1 |
| Case 44 | 8 | 39,687,113 | 43,791,691 | 2 | 0 | 2 | 1 |
| Case 44 | 8 | 46,886,735 | 47,042,399 | 2 | 0 | 2 | 1 |
| Case 44 | 8 | 47,060,602 | 47,831,465 | 2 | 2 | 4 | 0 |
| Case 44 | 8 | 47,846,757 | 51,733,342 | 3 | 2 | 5 | 0 |
| Case 44 | 8 | 51,744,861 | 52,164,871 | 4 | 2 | 6 | 0 |
| Case 44 | 8 | 52,181,920 | 52,384,884 | 3 | 1 | 4 | 0 |
| Case 44 | 8 | 52,387,593 | 58,810,226 | 3 | 2 | 5 | 0 |
| Case 44 | 8 | 58,814,505 | 59,107,029 | 3 | 1 | 4 | 0 |
| Case 44 | 8 | 59,113,981 | 68,604,866 | 3 | 2 | 5 | 0 |

|         |   |             |             |   |   |   |   |
|---------|---|-------------|-------------|---|---|---|---|
| Case 44 | 8 | 68,607,109  | 68,972,915  | 3 | 1 | 4 | 0 |
| Case 44 | 8 | 68,972,955  | 70,446,384  | 3 | 2 | 5 | 0 |
| Case 44 | 8 | 70,447,058  | 71,069,321  | 3 | 1 | 4 | 0 |
| Case 44 | 8 | 71,069,365  | 72,021,712  | 3 | 2 | 5 | 0 |
| Case 44 | 8 | 72,027,611  | 72,248,739  | 3 | 1 | 4 | 0 |
| Case 44 | 8 | 72,249,217  | 75,048,599  | 3 | 2 | 5 | 0 |
| Case 44 | 8 | 75,050,742  | 75,245,770  | 3 | 1 | 4 | 0 |
| Case 44 | 8 | 75,248,900  | 77,760,079  | 3 | 2 | 5 | 0 |
| Case 44 | 8 | 77,761,269  | 77,997,917  | 3 | 1 | 4 | 0 |
| Case 44 | 8 | 77,998,659  | 87,664,244  | 3 | 2 | 5 | 0 |
| Case 44 | 8 | 87,666,251  | 87,755,776  | 3 | 1 | 4 | 0 |
| Case 44 | 8 | 87,755,813  | 98,166,122  | 3 | 2 | 5 | 0 |
| Case 44 | 8 | 98,166,913  | 99,102,105  | 3 | 1 | 4 | 0 |
| Case 44 | 8 | 99,102,403  | 100,168,015 | 3 | 2 | 5 | 0 |
| Case 44 | 8 | 100,180,871 | 100,861,113 | 2 | 0 | 2 | 1 |
| Case 44 | 8 | 100,865,836 | 105,278,802 | 3 | 2 | 5 | 0 |
| Case 44 | 8 | 105,281,322 | 105,906,441 | 3 | 1 | 4 | 0 |
| Case 44 | 8 | 105,912,844 | 106,763,729 | 3 | 2 | 5 | 0 |
| Case 44 | 8 | 106,772,453 | 106,816,281 | 3 | 1 | 4 | 0 |
| Case 44 | 8 | 106,837,240 | 108,753,147 | 3 | 2 | 5 | 0 |
| Case 44 | 8 | 108,757,215 | 108,910,484 | 3 | 1 | 4 | 0 |
| Case 44 | 8 | 108,910,785 | 116,396,326 | 3 | 2 | 5 | 0 |
| Case 44 | 8 | 116,401,505 | 116,721,063 | 3 | 1 | 4 | 0 |
| Case 44 | 8 | 116,740,823 | 123,676,967 | 3 | 2 | 5 | 0 |
| Case 44 | 8 | 123,679,458 | 124,031,541 | 3 | 1 | 4 | 0 |
| Case 44 | 8 | 124,033,732 | 124,514,183 | 3 | 2 | 5 | 0 |
| Case 44 | 8 | 124,515,854 | 124,748,047 | 3 | 1 | 4 | 0 |
| Case 44 | 8 | 124,748,087 | 125,033,901 | 3 | 2 | 5 | 0 |
| Case 44 | 8 | 125,033,908 | 125,132,234 | 3 | 1 | 4 | 0 |
| Case 44 | 8 | 125,133,870 | 125,540,185 | 3 | 2 | 5 | 0 |
| Case 44 | 8 | 125,550,551 | 125,650,653 | 3 | 1 | 4 | 0 |
| Case 44 | 8 | 125,654,560 | 126,385,814 | 3 | 2 | 5 | 0 |
| Case 44 | 8 | 126,389,258 | 126,537,570 | 3 | 1 | 4 | 0 |
| Case 44 | 8 | 126,539,437 | 130,368,204 | 3 | 2 | 5 | 0 |
| Case 44 | 8 | 130,368,723 | 131,025,818 | 3 | 1 | 4 | 0 |
| Case 44 | 8 | 131,027,338 | 131,359,644 | 3 | 2 | 5 | 0 |
| Case 44 | 8 | 131,370,285 | 132,165,751 | 3 | 1 | 4 | 0 |
| Case 44 | 8 | 132,167,864 | 133,029,897 | 3 | 2 | 5 | 0 |
| Case 44 | 8 | 133,031,047 | 133,629,614 | 3 | 1 | 4 | 0 |
| Case 44 | 8 | 133,633,829 | 133,855,035 | 3 | 2 | 5 | 0 |
| Case 44 | 8 | 133,856,413 | 134,673,435 | 3 | 1 | 4 | 0 |
| Case 44 | 8 | 134,674,239 | 135,250,072 | 3 | 2 | 5 | 0 |
| Case 44 | 8 | 135,252,366 | 137,772,759 | 3 | 1 | 4 | 0 |
| Case 44 | 8 | 137,776,239 | 138,744,981 | 3 | 2 | 5 | 0 |
| Case 44 | 8 | 138,746,389 | 141,040,629 | 3 | 1 | 4 | 0 |
| Case 44 | 8 | 141,042,931 | 142,518,112 | 3 | 2 | 5 | 0 |
| Case 44 | 8 | 142,527,473 | 144,411,759 | 3 | 1 | 4 | 0 |
| Case 44 | 8 | 144,411,767 | 144,688,837 | 3 | 2 | 5 | 0 |
| Case 44 | 8 | 144,689,146 | 144,801,320 | 3 | 1 | 4 | 0 |
| Case 44 | 8 | 144,801,322 | 144,891,768 | 3 | 2 | 5 | 0 |
| Case 44 | 8 | 144,892,654 | 144,943,023 | 3 | 1 | 4 | 0 |
| Case 44 | 8 | 144,943,109 | 144,992,915 | 3 | 2 | 5 | 0 |
| Case 44 | 8 | 144,992,953 | 145,160,983 | 3 | 1 | 4 | 0 |
| Case 44 | 8 | 145,161,803 | 145,729,719 | 3 | 2 | 5 | 0 |
| Case 44 | 8 | 145,729,727 | 146,192,754 | 3 | 1 | 4 | 0 |
| Case 44 | 8 | 146,194,119 | 146,293,414 | 3 | 2 | 5 | 0 |
| Case 44 | 9 | 46,587      | 710,915     | 0 | 0 | 0 | 0 |
| Case 44 | 9 | 710,966     | 710,966     | 2 | 0 | 2 | 1 |
| Case 44 | 9 | 710,972     | 712,784     | 1 | 0 | 1 | 0 |
| Case 44 | 9 | 712,829     | 712,829     | 2 | 0 | 2 | 1 |
| Case 44 | 9 | 712,856     | 731,229     | 0 | 0 | 0 | 0 |

|         |   |            |            |   |   |   |   |
|---------|---|------------|------------|---|---|---|---|
| Case 44 | 9 | 732,502    | 732,617    | 2 | 0 | 2 | 1 |
| Case 44 | 9 | 733,049    | 839,141    | 0 | 0 | 0 | 0 |
| Case 44 | 9 | 840,501    | 4,046,886  | 2 | 0 | 2 | 1 |
| Case 44 | 9 | 4,047,947  | 4,100,236  | 3 | 0 | 3 | 1 |
| Case 44 | 9 | 4,102,339  | 4,371,844  | 2 | 0 | 2 | 1 |
| Case 44 | 9 | 4,372,189  | 4,580,651  | 3 | 0 | 3 | 1 |
| Case 44 | 9 | 4,583,132  | 4,884,050  | 2 | 0 | 2 | 1 |
| Case 44 | 9 | 4,888,355  | 4,943,454  | 3 | 0 | 3 | 1 |
| Case 44 | 9 | 4,946,989  | 5,593,419  | 2 | 0 | 2 | 1 |
| Case 44 | 9 | 5,604,769  | 5,769,251  | 3 | 0 | 3 | 1 |
| Case 44 | 9 | 5,769,326  | 12,578,438 | 2 | 0 | 2 | 1 |
| Case 44 | 9 | 12,581,270 | 12,772,498 | 3 | 0 | 3 | 1 |
| Case 44 | 9 | 12,773,263 | 14,087,769 | 2 | 0 | 2 | 1 |
| Case 44 | 9 | 14,088,789 | 14,312,724 | 3 | 0 | 3 | 1 |
| Case 44 | 9 | 14,313,712 | 14,566,116 | 2 | 0 | 2 | 1 |
| Case 44 | 9 | 14,566,406 | 14,694,211 | 3 | 0 | 3 | 1 |
| Case 44 | 9 | 14,694,302 | 14,730,124 | 2 | 0 | 2 | 1 |
| Case 44 | 9 | 14,730,234 | 14,823,221 | 3 | 0 | 3 | 1 |
| Case 44 | 9 | 14,823,283 | 15,552,399 | 2 | 0 | 2 | 1 |
| Case 44 | 9 | 15,564,100 | 15,874,622 | 3 | 0 | 3 | 1 |
| Case 44 | 9 | 15,876,247 | 19,058,204 | 2 | 0 | 2 | 1 |
| Case 44 | 9 | 19,058,396 | 19,087,154 | 3 | 0 | 3 | 1 |
| Case 44 | 9 | 19,087,429 | 19,281,501 | 2 | 0 | 2 | 1 |
| Case 44 | 9 | 19,290,143 | 19,332,100 | 3 | 0 | 3 | 1 |
| Case 44 | 9 | 19,335,160 | 19,472,784 | 2 | 0 | 2 | 1 |
| Case 44 | 9 | 19,476,532 | 19,637,920 | 3 | 0 | 3 | 1 |
| Case 44 | 9 | 19,642,563 | 19,742,145 | 2 | 0 | 2 | 1 |
| Case 44 | 9 | 19,746,160 | 19,898,792 | 3 | 0 | 3 | 1 |
| Case 44 | 9 | 19,899,443 | 20,341,734 | 2 | 0 | 2 | 1 |
| Case 44 | 9 | 20,342,044 | 20,820,347 | 3 | 0 | 3 | 1 |
| Case 44 | 9 | 20,820,961 | 21,846,327 | 2 | 0 | 2 | 1 |
| Case 44 | 9 | 21,853,221 | 22,362,104 | 3 | 0 | 3 | 1 |
| Case 44 | 9 | 22,364,080 | 22,520,468 | 2 | 0 | 2 | 1 |
| Case 44 | 9 | 22,523,533 | 22,784,110 | 3 | 0 | 3 | 1 |
| Case 44 | 9 | 22,786,315 | 30,698,142 | 2 | 0 | 2 | 1 |
| Case 44 | 9 | 30,713,637 | 30,728,974 | 4 | 1 | 5 | 0 |
| Case 44 | 9 | 30,743,422 | 31,174,646 | 5 | 1 | 6 | 0 |
| Case 44 | 9 | 31,178,755 | 31,602,656 | 4 | 2 | 6 | 0 |
| Case 44 | 9 | 31,608,609 | 33,444,861 | 2 | 2 | 4 | 0 |
| Case 44 | 9 | 33,447,547 | 33,518,281 | 2 | 1 | 3 | 0 |
| Case 44 | 9 | 33,525,447 | 34,240,205 | 2 | 2 | 4 | 0 |
| Case 44 | 9 | 34,241,267 | 34,257,923 | 2 | 1 | 3 | 0 |
| Case 44 | 9 | 34,257,979 | 34,587,485 | 2 | 2 | 4 | 0 |
| Case 44 | 9 | 34,592,699 | 34,710,450 | 2 | 0 | 2 | 1 |
| Case 44 | 9 | 34,713,129 | 34,971,542 | 3 | 0 | 3 | 1 |
| Case 44 | 9 | 34,972,352 | 35,881,628 | 2 | 0 | 2 | 1 |
| Case 44 | 9 | 35,887,412 | 36,110,806 | 3 | 0 | 3 | 1 |
| Case 44 | 9 | 36,113,712 | 36,234,439 | 2 | 0 | 2 | 1 |
| Case 44 | 9 | 36,236,974 | 36,702,096 | 3 | 0 | 3 | 1 |
| Case 44 | 9 | 36,702,485 | 39,076,028 | 2 | 0 | 2 | 1 |
| Case 44 | 9 | 39,098,698 | 46,944,322 | 2 | 1 | 3 | 0 |
| Case 44 | 9 | 65,629,772 | 69,410,435 | 2 | 1 | 3 | 0 |
| Case 44 | 9 | 70,984,372 | 73,482,440 | 2 | 2 | 4 | 0 |
| Case 44 | 9 | 73,485,048 | 74,298,720 | 3 | 2 | 5 | 0 |
| Case 44 | 9 | 74,299,442 | 75,218,470 | 2 | 2 | 4 | 0 |
| Case 44 | 9 | 75,229,248 | 76,731,402 | 3 | 2 | 5 | 0 |
| Case 44 | 9 | 76,732,506 | 77,595,402 | 2 | 2 | 4 | 0 |
| Case 44 | 9 | 77,595,948 | 77,851,696 | 3 | 2 | 5 | 0 |
| Case 44 | 9 | 77,852,292 | 78,263,565 | 2 | 2 | 4 | 0 |
| Case 44 | 9 | 78,266,575 | 78,465,639 | 3 | 2 | 5 | 0 |
| Case 44 | 9 | 78,473,260 | 79,802,986 | 2 | 2 | 4 | 0 |

|         |    |             |             |   |   |   |   |
|---------|----|-------------|-------------|---|---|---|---|
| Case 44 | 9  | 79,818,630  | 80,032,108  | 3 | 2 | 5 | 0 |
| Case 44 | 9  | 80,039,006  | 80,277,522  | 2 | 2 | 4 | 0 |
| Case 44 | 9  | 80,279,958  | 80,772,413  | 3 | 2 | 5 | 0 |
| Case 44 | 9  | 80,782,539  | 82,782,923  | 2 | 2 | 4 | 0 |
| Case 44 | 9  | 82,788,836  | 83,539,913  | 3 | 2 | 5 | 0 |
| Case 44 | 9  | 83,540,744  | 85,702,264  | 2 | 2 | 4 | 0 |
| Case 44 | 9  | 85,704,334  | 85,798,722  | 3 | 2 | 5 | 0 |
| Case 44 | 9  | 85,798,771  | 86,184,504  | 2 | 2 | 4 | 0 |
| Case 44 | 9  | 86,185,455  | 86,426,620  | 3 | 2 | 5 | 0 |
| Case 44 | 9  | 86,443,840  | 89,263,961  | 2 | 2 | 4 | 0 |
| Case 44 | 9  | 89,269,078  | 89,874,893  | 3 | 2 | 5 | 0 |
| Case 44 | 9  | 89,874,932  | 95,140,351  | 2 | 2 | 4 | 0 |
| Case 44 | 9  | 95,142,080  | 95,258,739  | 3 | 2 | 5 | 0 |
| Case 44 | 9  | 95,263,009  | 104,605,562 | 2 | 2 | 4 | 0 |
| Case 44 | 9  | 104,613,466 | 106,423,464 | 3 | 2 | 5 | 0 |
| Case 44 | 9  | 106,424,148 | 108,223,786 | 2 | 2 | 4 | 0 |
| Case 44 | 9  | 108,224,424 | 108,397,456 | 3 | 2 | 5 | 0 |
| Case 44 | 9  | 108,397,495 | 112,291,471 | 2 | 2 | 4 | 0 |
| Case 44 | 9  | 112,294,766 | 112,532,676 | 3 | 2 | 5 | 0 |
| Case 44 | 9  | 112,534,856 | 114,341,376 | 2 | 2 | 4 | 0 |
| Case 44 | 9  | 114,342,146 | 114,777,275 | 3 | 2 | 5 | 0 |
| Case 44 | 9  | 114,777,545 | 114,839,679 | 2 | 2 | 4 | 0 |
| Case 44 | 9  | 114,842,383 | 115,447,935 | 3 | 2 | 5 | 0 |
| Case 44 | 9  | 115,448,341 | 115,654,683 | 2 | 2 | 4 | 0 |
| Case 44 | 9  | 115,660,368 | 115,900,533 | 3 | 2 | 5 | 0 |
| Case 44 | 9  | 115,901,241 | 118,256,674 | 2 | 2 | 4 | 0 |
| Case 44 | 9  | 118,258,940 | 118,790,317 | 3 | 2 | 5 | 0 |
| Case 44 | 9  | 118,790,936 | 123,713,203 | 2 | 2 | 4 | 0 |
| Case 44 | 9  | 123,714,395 | 123,924,221 | 3 | 2 | 5 | 0 |
| Case 44 | 9  | 123,924,470 | 140,242,692 | 2 | 2 | 4 | 0 |
| Case 44 | 9  | 140,243,566 | 140,243,973 | 2 | 0 | 2 | 1 |
| Case 44 | 9  | 140,245,516 | 141,066,491 | 2 | 2 | 4 | 0 |
| Case 44 | 10 | 98,087      | 1,018,585   | 3 | 1 | 4 | 0 |
| Case 44 | 10 | 1,032,568   | 2,168,400   | 2 | 2 | 4 | 0 |
| Case 44 | 10 | 2,172,881   | 2,715,418   | 2 | 1 | 3 | 0 |
| Case 44 | 10 | 2,717,229   | 2,992,761   | 2 | 2 | 4 | 0 |
| Case 44 | 10 | 2,993,191   | 3,176,363   | 2 | 1 | 3 | 0 |
| Case 44 | 10 | 3,176,389   | 5,926,216   | 2 | 2 | 4 | 0 |
| Case 44 | 10 | 5,929,962   | 6,028,491   | 2 | 1 | 3 | 0 |
| Case 44 | 10 | 6,029,726   | 7,383,138   | 2 | 2 | 4 | 0 |
| Case 44 | 10 | 7,385,798   | 7,653,065   | 2 | 1 | 3 | 0 |
| Case 44 | 10 | 7,654,501   | 7,759,595   | 2 | 2 | 4 | 0 |
| Case 44 | 10 | 7,759,650   | 7,790,894   | 2 | 1 | 3 | 0 |
| Case 44 | 10 | 7,791,218   | 7,932,563   | 2 | 2 | 4 | 0 |
| Case 44 | 10 | 7,935,761   | 8,247,228   | 2 | 1 | 3 | 0 |
| Case 44 | 10 | 8,251,061   | 8,449,327   | 2 | 2 | 4 | 0 |
| Case 44 | 10 | 8,453,142   | 8,714,074   | 2 | 1 | 3 | 0 |
| Case 44 | 10 | 8,715,144   | 10,546,342  | 2 | 2 | 4 | 0 |
| Case 44 | 10 | 10,549,627  | 10,772,031  | 2 | 1 | 3 | 0 |
| Case 44 | 10 | 10,773,755  | 12,940,377  | 2 | 2 | 4 | 0 |
| Case 44 | 10 | 12,940,631  | 13,017,220  | 2 | 1 | 3 | 0 |
| Case 44 | 10 | 13,022,684  | 13,663,011  | 2 | 2 | 4 | 0 |
| Case 44 | 10 | 13,664,667  | 13,790,265  | 2 | 1 | 3 | 0 |
| Case 44 | 10 | 13,791,188  | 16,477,295  | 2 | 2 | 4 | 0 |
| Case 44 | 10 | 16,478,278  | 16,584,422  | 2 | 1 | 3 | 0 |
| Case 44 | 10 | 16,585,522  | 16,806,492  | 2 | 2 | 4 | 0 |
| Case 44 | 10 | 16,807,745  | 16,903,080  | 2 | 1 | 3 | 0 |
| Case 44 | 10 | 16,905,500  | 18,758,893  | 2 | 2 | 4 | 0 |
| Case 44 | 10 | 18,759,629  | 18,892,382  | 2 | 1 | 3 | 0 |
| Case 44 | 10 | 18,896,035  | 23,383,522  | 2 | 2 | 4 | 0 |
| Case 44 | 10 | 23,387,179  | 23,729,362  | 2 | 1 | 3 | 0 |

|         |    |             |             |   |   |   |   |
|---------|----|-------------|-------------|---|---|---|---|
| Case 44 | 10 | 23,730,191  | 24,753,335  | 2 | 2 | 4 | 0 |
| Case 44 | 10 | 24,762,214  | 24,842,278  | 2 | 1 | 3 | 0 |
| Case 44 | 10 | 24,842,340  | 29,642,160  | 2 | 2 | 4 | 0 |
| Case 44 | 10 | 29,648,177  | 29,780,468  | 2 | 1 | 3 | 0 |
| Case 44 | 10 | 29,781,479  | 29,812,889  | 2 | 2 | 4 | 0 |
| Case 44 | 10 | 29,812,928  | 29,839,787  | 2 | 1 | 3 | 0 |
| Case 44 | 10 | 29,839,864  | 31,081,548  | 2 | 2 | 4 | 0 |
| Case 44 | 10 | 31,082,591  | 31,138,817  | 2 | 1 | 3 | 0 |
| Case 44 | 10 | 31,139,255  | 35,894,560  | 2 | 2 | 4 | 0 |
| Case 44 | 10 | 35,896,470  | 36,191,613  | 2 | 1 | 3 | 0 |
| Case 44 | 10 | 36,198,869  | 39,070,516  | 2 | 2 | 4 | 0 |
| Case 44 | 10 | 39,088,829  | 39,097,912  | 2 | 0 | 2 | 1 |
| Case 44 | 10 | 42,436,301  | 61,598,118  | 2 | 0 | 2 | 1 |
| Case 44 | 10 | 61,600,910  | 61,813,046  | 3 | 0 | 3 | 1 |
| Case 44 | 10 | 61,813,117  | 61,833,170  | 2 | 0 | 2 | 1 |
| Case 44 | 10 | 61,833,414  | 61,882,020  | 3 | 0 | 3 | 1 |
| Case 44 | 10 | 61,882,414  | 63,952,639  | 2 | 0 | 2 | 1 |
| Case 44 | 10 | 63,954,188  | 64,014,095  | 3 | 0 | 3 | 1 |
| Case 44 | 10 | 64,022,478  | 70,338,978  | 2 | 0 | 2 | 1 |
| Case 44 | 10 | 70,341,213  | 70,925,830  | 3 | 0 | 3 | 1 |
| Case 44 | 10 | 70,930,360  | 71,905,780  | 2 | 0 | 2 | 1 |
| Case 44 | 10 | 71,906,150  | 72,048,894  | 3 | 0 | 3 | 1 |
| Case 44 | 10 | 72,049,765  | 73,772,336  | 2 | 0 | 2 | 1 |
| Case 44 | 10 | 73,772,570  | 74,016,351  | 3 | 0 | 3 | 1 |
| Case 44 | 10 | 74,020,044  | 74,884,078  | 2 | 0 | 2 | 1 |
| Case 44 | 10 | 74,884,891  | 75,265,095  | 3 | 0 | 3 | 1 |
| Case 44 | 10 | 75,265,136  | 75,896,523  | 2 | 0 | 2 | 1 |
| Case 44 | 10 | 75,900,462  | 75,940,906  | 0 | 0 | 0 | 0 |
| Case 44 | 10 | 75,946,564  | 76,400,262  | 3 | 0 | 3 | 1 |
| Case 44 | 10 | 76,401,365  | 88,799,610  | 2 | 0 | 2 | 1 |
| Case 44 | 10 | 88,813,420  | 89,826,707  | 3 | 0 | 3 | 1 |
| Case 44 | 10 | 89,826,804  | 90,155,863  | 2 | 0 | 2 | 1 |
| Case 44 | 10 | 90,167,065  | 90,436,201  | 3 | 0 | 3 | 1 |
| Case 44 | 10 | 90,438,207  | 91,469,005  | 2 | 0 | 2 | 1 |
| Case 44 | 10 | 91,469,145  | 91,551,019  | 3 | 0 | 3 | 1 |
| Case 44 | 10 | 91,553,642  | 93,781,926  | 2 | 0 | 2 | 1 |
| Case 44 | 10 | 93,784,696  | 94,782,735  | 3 | 0 | 3 | 1 |
| Case 44 | 10 | 94,783,432  | 94,899,090  | 2 | 0 | 2 | 1 |
| Case 44 | 10 | 94,899,803  | 95,264,375  | 3 | 0 | 3 | 1 |
| Case 44 | 10 | 95,264,507  | 95,389,728  | 2 | 0 | 2 | 1 |
| Case 44 | 10 | 95,392,149  | 95,755,058  | 3 | 0 | 3 | 1 |
| Case 44 | 10 | 95,764,616  | 96,796,861  | 2 | 0 | 2 | 1 |
| Case 44 | 10 | 96,797,033  | 96,804,676  | 3 | 0 | 3 | 1 |
| Case 44 | 10 | 96,805,060  | 97,013,497  | 2 | 0 | 2 | 1 |
| Case 44 | 10 | 97,020,612  | 97,305,536  | 3 | 0 | 3 | 1 |
| Case 44 | 10 | 97,308,045  | 98,004,697  | 2 | 0 | 2 | 1 |
| Case 44 | 10 | 98,006,765  | 98,127,590  | 3 | 0 | 3 | 1 |
| Case 44 | 10 | 98,127,968  | 98,407,483  | 2 | 0 | 2 | 1 |
| Case 44 | 10 | 98,410,170  | 98,741,907  | 3 | 0 | 3 | 1 |
| Case 44 | 10 | 98,741,943  | 99,531,185  | 2 | 0 | 2 | 1 |
| Case 44 | 10 | 99,531,239  | 99,640,572  | 3 | 0 | 3 | 1 |
| Case 44 | 10 | 99,640,651  | 101,295,143 | 2 | 0 | 2 | 1 |
| Case 44 | 10 | 101,301,346 | 101,565,157 | 3 | 0 | 3 | 1 |
| Case 44 | 10 | 101,565,167 | 101,877,961 | 2 | 0 | 2 | 1 |
| Case 44 | 10 | 101,880,700 | 102,109,202 | 3 | 0 | 3 | 1 |
| Case 44 | 10 | 102,111,046 | 102,427,797 | 2 | 0 | 2 | 1 |
| Case 44 | 10 | 102,433,046 | 102,732,746 | 3 | 0 | 3 | 1 |
| Case 44 | 10 | 102,733,008 | 103,372,098 | 2 | 0 | 2 | 1 |
| Case 44 | 10 | 103,390,956 | 103,455,809 | 7 | 0 | 7 | 1 |
| Case 44 | 10 | 103,488,124 | 104,597,152 | 2 | 0 | 2 | 1 |
| Case 44 | 10 | 104,597,480 | 105,198,457 | 3 | 0 | 3 | 1 |



|         |    |             |             |   |   |   |   |
|---------|----|-------------|-------------|---|---|---|---|
| Case 44 | 10 | 105,199,552 | 105,642,449 | 2 | 0 | 2 | 1 |
| Case 44 | 10 | 105,642,542 | 106,027,144 | 3 | 0 | 3 | 1 |
| Case 44 | 10 | 106,027,902 | 111,773,423 | 2 | 0 | 2 | 1 |
| Case 44 | 10 | 111,775,849 | 112,115,666 | 3 | 0 | 3 | 1 |
| Case 44 | 10 | 112,116,232 | 112,323,187 | 2 | 0 | 2 | 1 |
| Case 44 | 10 | 112,326,831 | 112,394,893 | 3 | 0 | 3 | 1 |
| Case 44 | 10 | 112,397,144 | 114,081,995 | 2 | 0 | 2 | 1 |
| Case 44 | 10 | 114,082,666 | 114,724,358 | 3 | 0 | 3 | 1 |
| Case 44 | 10 | 114,732,906 | 115,372,156 | 2 | 0 | 2 | 1 |
| Case 44 | 10 | 115,372,177 | 116,044,725 | 3 | 0 | 3 | 1 |
| Case 44 | 10 | 116,045,577 | 116,171,638 | 2 | 0 | 2 | 1 |
| Case 44 | 10 | 116,172,486 | 116,602,741 | 3 | 0 | 3 | 1 |
| Case 44 | 10 | 116,603,648 | 116,708,190 | 2 | 0 | 2 | 1 |
| Case 44 | 10 | 116,714,241 | 117,228,778 | 3 | 0 | 3 | 1 |
| Case 44 | 10 | 117,228,794 | 121,462,638 | 2 | 0 | 2 | 1 |
| Case 44 | 10 | 121,464,562 | 121,762,190 | 3 | 0 | 3 | 1 |
| Case 44 | 10 | 121,764,195 | 122,374,787 | 2 | 0 | 2 | 1 |
| Case 44 | 10 | 122,383,804 | 124,337,325 | 7 | 0 | 7 | 1 |
| Case 44 | 10 | 124,351,013 | 124,351,860 | 2 | 0 | 2 | 1 |
| Case 44 | 10 | 124,353,109 | 124,396,678 | 4 | 1 | 5 | 0 |
| Case 44 | 10 | 124,396,760 | 124,824,630 | 6 | 1 | 7 | 0 |
| Case 44 | 10 | 124,827,165 | 124,913,996 | 4 | 1 | 5 | 0 |
| Case 44 | 10 | 124,916,984 | 126,419,153 | 6 | 1 | 7 | 0 |
| Case 44 | 10 | 126,438,019 | 126,438,019 | 2 | 2 | 4 | 0 |
| Case 44 | 10 | 126,445,630 | 128,894,539 | 2 | 0 | 2 | 1 |
| Case 44 | 10 | 128,901,414 | 129,023,096 | 3 | 0 | 3 | 1 |
| Case 44 | 10 | 129,025,576 | 135,477,883 | 2 | 0 | 2 | 1 |
| Case 44 | 11 | 193,146     | 558,669     | 2 | 2 | 4 | 0 |
| Case 44 | 11 | 558,690     | 639,830     | 2 | 1 | 3 | 0 |
| Case 44 | 11 | 640,253     | 1,016,238   | 2 | 2 | 4 | 0 |
| Case 44 | 11 | 1,016,253   | 1,023,530   | 2 | 1 | 3 | 0 |
| Case 44 | 11 | 1,023,605   | 3,664,427   | 2 | 2 | 4 | 0 |
| Case 44 | 11 | 3,665,604   | 3,697,789   | 2 | 1 | 3 | 0 |
| Case 44 | 11 | 3,698,843   | 4,790,214   | 2 | 2 | 4 | 0 |
| Case 44 | 11 | 4,790,268   | 4,904,082   | 2 | 1 | 3 | 0 |
| Case 44 | 11 | 4,905,155   | 4,932,775   | 2 | 2 | 4 | 0 |
| Case 44 | 11 | 4,934,503   | 4,946,056   | 2 | 1 | 3 | 0 |
| Case 44 | 11 | 4,946,345   | 5,361,272   | 2 | 2 | 4 | 0 |
| Case 44 | 11 | 5,364,013   | 5,474,965   | 2 | 1 | 3 | 0 |
| Case 44 | 11 | 5,474,971   | 5,510,626   | 2 | 2 | 4 | 0 |
| Case 44 | 11 | 5,510,688   | 5,537,608   | 2 | 1 | 3 | 0 |
| Case 44 | 11 | 5,539,139   | 5,850,768   | 2 | 2 | 4 | 0 |
| Case 44 | 11 | 5,850,793   | 5,906,367   | 2 | 1 | 3 | 0 |
| Case 44 | 11 | 5,906,424   | 6,220,713   | 2 | 2 | 4 | 0 |
| Case 44 | 11 | 6,220,820   | 6,265,569   | 2 | 1 | 3 | 0 |
| Case 44 | 11 | 6,265,620   | 6,397,336   | 2 | 2 | 4 | 0 |
| Case 44 | 11 | 6,400,407   | 6,662,787   | 2 | 1 | 3 | 0 |
| Case 44 | 11 | 6,666,054   | 7,669,736   | 2 | 2 | 4 | 0 |
| Case 44 | 11 | 7,670,139   | 7,721,974   | 2 | 1 | 3 | 0 |
| Case 44 | 11 | 7,723,017   | 10,614,128  | 2 | 2 | 4 | 0 |
| Case 44 | 11 | 10,615,473  | 10,655,609  | 2 | 1 | 3 | 0 |
| Case 44 | 11 | 10,656,687  | 15,197,630  | 2 | 2 | 4 | 0 |
| Case 44 | 11 | 15,198,685  | 15,267,597  | 2 | 1 | 3 | 0 |
| Case 44 | 11 | 15,267,727  | 16,015,766  | 2 | 2 | 4 | 0 |
| Case 44 | 11 | 16,022,866  | 16,787,777  | 3 | 0 | 3 | 1 |
| Case 44 | 11 | 16,787,922  | 17,062,454  | 2 | 0 | 2 | 1 |
| Case 44 | 11 | 17,069,800  | 18,636,422  | 2 | 2 | 4 | 0 |
| Case 44 | 11 | 18,636,425  | 18,764,915  | 2 | 1 | 3 | 0 |
| Case 44 | 11 | 18,765,648  | 20,612,269  | 2 | 2 | 4 | 0 |
| Case 44 | 11 | 20,618,035  | 20,669,971  | 2 | 1 | 3 | 0 |
| Case 44 | 11 | 20,673,867  | 43,238,542  | 2 | 2 | 4 | 0 |

|         |    |             |             |   |   |   |   |
|---------|----|-------------|-------------|---|---|---|---|
| Case 44 | 11 | 43,239,836  | 43,544,452  | 2 | 1 | 3 | 0 |
| Case 44 | 11 | 43,544,831  | 50,467,961  | 2 | 2 | 4 | 0 |
| Case 44 | 11 | 50,468,978  | 51,372,036  | 2 | 1 | 3 | 0 |
| Case 44 | 11 | 51,379,204  | 51,591,253  | 2 | 2 | 4 | 0 |
| Case 44 | 11 | 54,794,237  | 55,110,277  | 2 | 2 | 4 | 0 |
| Case 44 | 11 | 55,110,761  | 55,136,143  | 2 | 1 | 3 | 0 |
| Case 44 | 11 | 55,136,149  | 55,321,978  | 2 | 2 | 4 | 0 |
| Case 44 | 11 | 55,322,020  | 55,437,126  | 2 | 1 | 3 | 0 |
| Case 44 | 11 | 55,445,294  | 55,563,362  | 2 | 2 | 4 | 0 |
| Case 44 | 11 | 55,563,402  | 55,606,712  | 2 | 1 | 3 | 0 |
| Case 44 | 11 | 55,607,114  | 56,467,897  | 2 | 2 | 4 | 0 |
| Case 44 | 11 | 56,467,898  | 56,511,066  | 3 | 0 | 3 | 1 |
| Case 44 | 11 | 56,511,104  | 57,065,220  | 2 | 2 | 4 | 0 |
| Case 44 | 11 | 57,066,448  | 57,156,586  | 2 | 1 | 3 | 0 |
| Case 44 | 11 | 57,156,590  | 59,210,550  | 2 | 2 | 4 | 0 |
| Case 44 | 11 | 59,210,646  | 59,578,322  | 2 | 1 | 3 | 0 |
| Case 44 | 11 | 59,586,423  | 60,470,896  | 2 | 2 | 4 | 0 |
| Case 44 | 11 | 60,470,914  | 60,704,740  | 2 | 1 | 3 | 0 |
| Case 44 | 11 | 60,704,782  | 60,829,178  | 2 | 2 | 4 | 0 |
| Case 44 | 11 | 60,830,367  | 61,078,988  | 2 | 1 | 3 | 0 |
| Case 44 | 11 | 61,081,819  | 61,533,183  | 2 | 2 | 4 | 0 |
| Case 44 | 11 | 61,533,449  | 61,730,619  | 2 | 1 | 3 | 0 |
| Case 44 | 11 | 61,731,233  | 62,287,107  | 2 | 2 | 4 | 0 |
| Case 44 | 11 | 62,287,166  | 62,434,314  | 2 | 1 | 3 | 0 |
| Case 44 | 11 | 62,434,383  | 63,999,929  | 2 | 2 | 4 | 0 |
| Case 44 | 11 | 63,999,971  | 64,028,916  | 2 | 1 | 3 | 0 |
| Case 44 | 11 | 64,031,030  | 64,525,334  | 2 | 2 | 4 | 0 |
| Case 44 | 11 | 64,525,729  | 64,607,663  | 2 | 1 | 3 | 0 |
| Case 44 | 11 | 64,607,665  | 67,077,712  | 2 | 2 | 4 | 0 |
| Case 44 | 11 | 67,079,143  | 67,266,164  | 2 | 1 | 3 | 0 |
| Case 44 | 11 | 67,266,176  | 68,685,216  | 2 | 2 | 4 | 0 |
| Case 44 | 11 | 68,685,306  | 68,793,206  | 2 | 1 | 3 | 0 |
| Case 44 | 11 | 68,798,102  | 72,917,269  | 2 | 2 | 4 | 0 |
| Case 44 | 11 | 72,918,159  | 73,106,496  | 2 | 1 | 3 | 0 |
| Case 44 | 11 | 73,106,507  | 92,531,356  | 2 | 2 | 4 | 0 |
| Case 44 | 11 | 92,531,377  | 92,623,951  | 2 | 1 | 3 | 0 |
| Case 44 | 11 | 92,624,169  | 104,857,221 | 2 | 2 | 4 | 0 |
| Case 44 | 11 | 104,866,515 | 105,010,448 | 2 | 1 | 3 | 0 |
| Case 44 | 11 | 105,016,907 | 113,925,266 | 2 | 2 | 4 | 0 |
| Case 44 | 11 | 113,928,861 | 114,071,287 | 2 | 1 | 3 | 0 |
| Case 44 | 11 | 114,072,365 | 117,038,251 | 2 | 2 | 4 | 0 |
| Case 44 | 11 | 117,038,426 | 117,308,649 | 2 | 1 | 3 | 0 |
| Case 44 | 11 | 117,308,707 | 118,502,670 | 2 | 2 | 4 | 0 |
| Case 44 | 11 | 118,502,688 | 118,533,904 | 2 | 1 | 3 | 0 |
| Case 44 | 11 | 118,534,082 | 118,755,738 | 2 | 2 | 4 | 0 |
| Case 44 | 11 | 118,758,089 | 118,959,331 | 2 | 1 | 3 | 0 |
| Case 44 | 11 | 118,959,391 | 118,981,364 | 2 | 2 | 4 | 0 |
| Case 44 | 11 | 118,981,382 | 119,060,188 | 2 | 1 | 3 | 0 |
| Case 44 | 11 | 119,060,963 | 122,495,678 | 2 | 2 | 4 | 0 |
| Case 44 | 11 | 122,496,249 | 122,595,235 | 2 | 1 | 3 | 0 |
| Case 44 | 11 | 122,598,951 | 123,447,713 | 2 | 2 | 4 | 0 |
| Case 44 | 11 | 123,452,297 | 123,504,870 | 2 | 1 | 3 | 0 |
| Case 44 | 11 | 123,505,099 | 123,777,536 | 2 | 2 | 4 | 0 |
| Case 44 | 11 | 123,777,546 | 123,917,393 | 3 | 0 | 3 | 1 |
| Case 44 | 11 | 123,918,667 | 124,506,947 | 2 | 2 | 4 | 0 |
| Case 44 | 11 | 124,506,967 | 124,674,924 | 2 | 1 | 3 | 0 |
| Case 44 | 11 | 124,677,941 | 124,742,365 | 2 | 2 | 4 | 0 |
| Case 44 | 11 | 124,742,385 | 124,767,067 | 2 | 1 | 3 | 0 |
| Case 44 | 11 | 124,769,619 | 133,599,939 | 2 | 2 | 4 | 0 |
| Case 44 | 11 | 133,602,329 | 133,803,239 | 2 | 1 | 3 | 0 |
| Case 44 | 11 | 133,805,585 | 134,470,241 | 2 | 2 | 4 | 0 |

|         |    |             |             |   |   |   |   |
|---------|----|-------------|-------------|---|---|---|---|
| Case 44 | 11 | 134,478,278 | 134,560,189 | 2 | 1 | 3 | 0 |
| Case 44 | 11 | 134,561,194 | 134,934,063 | 2 | 2 | 4 | 0 |
| Case 44 | 12 | 191,619     | 333,226     | 2 | 0 | 2 | 1 |
| Case 44 | 12 | 333,238     | 637,363     | 3 | 0 | 3 | 1 |
| Case 44 | 12 | 638,166     | 1,180,197   | 2 | 0 | 2 | 1 |
| Case 44 | 12 | 1,192,370   | 1,734,593   | 3 | 0 | 3 | 1 |
| Case 44 | 12 | 1,737,580   | 2,074,822   | 2 | 0 | 2 | 1 |
| Case 44 | 12 | 2,077,618   | 2,500,203   | 3 | 0 | 3 | 1 |
| Case 44 | 12 | 2,500,314   | 3,867,471   | 2 | 0 | 2 | 1 |
| Case 44 | 12 | 3,868,309   | 3,978,256   | 3 | 0 | 3 | 1 |
| Case 44 | 12 | 3,978,661   | 6,572,549   | 2 | 0 | 2 | 1 |
| Case 44 | 12 | 6,573,146   | 6,905,181   | 3 | 0 | 3 | 1 |
| Case 44 | 12 | 6,905,417   | 7,362,801   | 2 | 0 | 2 | 1 |
| Case 44 | 12 | 7,364,442   | 7,632,492   | 3 | 0 | 3 | 1 |
| Case 44 | 12 | 7,632,533   | 10,356,914  | 2 | 0 | 2 | 1 |
| Case 44 | 12 | 10,362,875  | 10,570,965  | 3 | 0 | 3 | 1 |
| Case 44 | 12 | 10,571,024  | 11,975,818  | 2 | 0 | 2 | 1 |
| Case 44 | 12 | 11,977,949  | 12,397,428  | 3 | 0 | 3 | 1 |
| Case 44 | 12 | 12,397,532  | 12,496,153  | 2 | 0 | 2 | 1 |
| Case 44 | 12 | 12,496,184  | 12,586,936  | 3 | 0 | 3 | 1 |
| Case 44 | 12 | 12,589,705  | 12,940,506  | 2 | 0 | 2 | 1 |
| Case 44 | 12 | 12,940,830  | 14,609,541  | 3 | 0 | 3 | 1 |
| Case 44 | 12 | 14,610,199  | 15,134,729  | 2 | 0 | 2 | 1 |
| Case 44 | 12 | 15,135,357  | 16,222,477  | 3 | 0 | 3 | 1 |
| Case 44 | 12 | 16,227,627  | 22,525,876  | 2 | 0 | 2 | 1 |
| Case 44 | 12 | 22,535,713  | 22,954,215  | 3 | 0 | 3 | 1 |
| Case 44 | 12 | 22,956,137  | 28,231,087  | 2 | 0 | 2 | 1 |
| Case 44 | 12 | 28,231,529  | 28,324,833  | 3 | 0 | 3 | 1 |
| Case 44 | 12 | 28,330,659  | 30,789,975  | 2 | 0 | 2 | 1 |
| Case 44 | 12 | 30,789,981  | 30,877,327  | 3 | 0 | 3 | 1 |
| Case 44 | 12 | 30,877,343  | 32,472,514  | 2 | 0 | 2 | 1 |
| Case 44 | 12 | 32,476,727  | 32,704,908  | 3 | 0 | 3 | 1 |
| Case 44 | 12 | 32,706,067  | 32,754,253  | 2 | 0 | 2 | 1 |
| Case 44 | 12 | 32,755,259  | 32,906,865  | 3 | 0 | 3 | 1 |
| Case 44 | 12 | 32,906,871  | 33,064,825  | 2 | 0 | 2 | 1 |
| Case 44 | 12 | 33,070,372  | 33,626,530  | 3 | 0 | 3 | 1 |
| Case 44 | 12 | 33,629,542  | 34,853,011  | 2 | 0 | 2 | 1 |
| Case 44 | 12 | 37,876,400  | 51,089,137  | 2 | 1 | 3 | 0 |
| Case 44 | 12 | 51,089,718  | 51,939,749  | 2 | 2 | 4 | 0 |
| Case 44 | 12 | 51,940,447  | 52,115,545  | 3 | 2 | 5 | 0 |
| Case 44 | 12 | 52,139,786  | 53,908,839  | 2 | 2 | 4 | 0 |
| Case 44 | 12 | 53,912,961  | 54,099,369  | 3 | 2 | 5 | 0 |
| Case 44 | 12 | 54,100,756  | 54,196,100  | 2 | 2 | 4 | 0 |
| Case 44 | 12 | 54,203,866  | 54,357,198  | 3 | 0 | 3 | 1 |
| Case 44 | 12 | 54,360,429  | 55,688,894  | 2 | 2 | 4 | 0 |
| Case 44 | 12 | 55,688,895  | 55,920,314  | 3 | 2 | 5 | 0 |
| Case 44 | 12 | 55,921,591  | 58,340,855  | 2 | 2 | 4 | 0 |
| Case 44 | 12 | 58,342,677  | 59,529,479  | 3 | 2 | 5 | 0 |
| Case 44 | 12 | 59,534,075  | 61,643,164  | 4 | 2 | 6 | 0 |
| Case 44 | 12 | 61,664,878  | 61,802,276  | 2 | 1 | 3 | 0 |
| Case 44 | 12 | 61,815,188  | 62,994,433  | 6 | 1 | 7 | 0 |
| Case 44 | 12 | 62,995,984  | 63,195,840  | 4 | 1 | 5 | 0 |
| Case 44 | 12 | 63,198,885  | 66,606,228  | 5 | 1 | 6 | 0 |
| Case 44 | 12 | 66,610,970  | 66,815,880  | 4 | 1 | 5 | 0 |
| Case 44 | 12 | 66,816,139  | 69,133,950  | 5 | 1 | 6 | 0 |
| Case 44 | 12 | 69,135,744  | 69,411,195  | 4 | 1 | 5 | 0 |
| Case 44 | 12 | 69,417,521  | 69,645,385  | 2 | 2 | 4 | 0 |
| Case 44 | 12 | 69,645,566  | 70,836,819  | 3 | 2 | 5 | 0 |
| Case 44 | 12 | 70,837,122  | 72,115,892  | 2 | 2 | 4 | 0 |
| Case 44 | 12 | 72,118,258  | 72,317,808  | 3 | 2 | 5 | 0 |
| Case 44 | 12 | 72,323,834  | 72,977,698  | 2 | 2 | 4 | 0 |

|         |    |             |             |   |   |   |   |
|---------|----|-------------|-------------|---|---|---|---|
| Case 44 | 12 | 72,993,694  | 73,061,014  | 5 | 1 | 6 | 0 |
| Case 44 | 12 | 73,067,572  | 73,525,625  | 4 | 1 | 5 | 0 |
| Case 44 | 12 | 73,526,915  | 74,925,886  | 4 | 2 | 6 | 0 |
| Case 44 | 12 | 74,931,063  | 112,771,063 | 2 | 1 | 3 | 0 |
| Case 44 | 12 | 112,781,844 | 113,382,281 | 2 | 2 | 4 | 0 |
| Case 44 | 12 | 113,382,362 | 113,646,036 | 2 | 1 | 3 | 0 |
| Case 44 | 12 | 113,646,044 | 117,890,947 | 2 | 2 | 4 | 0 |
| Case 44 | 12 | 117,892,931 | 118,012,391 | 2 | 1 | 3 | 0 |
| Case 44 | 12 | 118,013,591 | 119,560,500 | 2 | 2 | 4 | 0 |
| Case 44 | 12 | 119,561,045 | 119,698,679 | 2 | 1 | 3 | 0 |
| Case 44 | 12 | 119,700,000 | 122,656,256 | 2 | 2 | 4 | 0 |
| Case 44 | 12 | 122,657,198 | 122,701,389 | 2 | 1 | 3 | 0 |
| Case 44 | 12 | 122,706,844 | 123,338,616 | 2 | 2 | 4 | 0 |
| Case 44 | 12 | 123,339,117 | 123,572,495 | 2 | 1 | 3 | 0 |
| Case 44 | 12 | 123,574,838 | 124,371,744 | 2 | 2 | 4 | 0 |
| Case 44 | 12 | 124,371,782 | 124,434,346 | 2 | 1 | 3 | 0 |
| Case 44 | 12 | 124,449,951 | 124,820,043 | 2 | 2 | 4 | 0 |
| Case 44 | 12 | 124,821,403 | 124,880,884 | 2 | 1 | 3 | 0 |
| Case 44 | 12 | 124,883,884 | 126,980,655 | 2 | 2 | 4 | 0 |
| Case 44 | 12 | 126,985,891 | 127,271,247 | 2 | 1 | 3 | 0 |
| Case 44 | 12 | 127,271,810 | 128,919,798 | 2 | 2 | 4 | 0 |
| Case 44 | 12 | 128,919,835 | 129,373,073 | 2 | 1 | 3 | 0 |
| Case 44 | 12 | 129,373,247 | 129,446,921 | 2 | 2 | 4 | 0 |
| Case 44 | 12 | 129,451,607 | 129,580,651 | 2 | 1 | 3 | 0 |
| Case 44 | 12 | 129,582,658 | 130,541,023 | 2 | 2 | 4 | 0 |
| Case 44 | 12 | 130,541,525 | 130,655,365 | 2 | 1 | 3 | 0 |
| Case 44 | 12 | 130,659,526 | 131,438,037 | 2 | 2 | 4 | 0 |
| Case 44 | 12 | 131,438,217 | 131,508,818 | 2 | 1 | 3 | 0 |
| Case 44 | 12 | 131,510,577 | 132,316,248 | 2 | 2 | 4 | 0 |
| Case 44 | 12 | 132,317,991 | 132,635,871 | 2 | 1 | 3 | 0 |
| Case 44 | 12 | 132,635,873 | 133,058,066 | 2 | 2 | 4 | 0 |
| Case 44 | 12 | 133,058,288 | 133,384,678 | 2 | 1 | 3 | 0 |
| Case 44 | 12 | 133,384,688 | 133,810,935 | 2 | 2 | 4 | 0 |
| Case 44 | 13 | 19,058,717  | 19,758,799  | 3 | 0 | 3 | 1 |
| Case 44 | 13 | 19,771,535  | 20,676,866  | 4 | 0 | 4 | 1 |
| Case 44 | 13 | 20,678,392  | 20,940,589  | 3 | 0 | 3 | 1 |
| Case 44 | 13 | 20,942,121  | 21,118,721  | 4 | 0 | 4 | 1 |
| Case 44 | 13 | 21,120,557  | 21,483,113  | 5 | 0 | 5 | 1 |
| Case 44 | 13 | 21,483,892  | 21,555,714  | 4 | 0 | 4 | 1 |
| Case 44 | 13 | 21,557,450  | 21,714,920  | 3 | 0 | 3 | 1 |
| Case 44 | 13 | 21,715,602  | 21,872,188  | 2 | 2 | 4 | 0 |
| Case 44 | 13 | 21,872,348  | 21,947,766  | 3 | 0 | 3 | 1 |
| Case 44 | 13 | 21,948,988  | 22,227,197  | 4 | 0 | 4 | 1 |
| Case 44 | 13 | 22,231,601  | 22,715,567  | 3 | 0 | 3 | 1 |
| Case 44 | 13 | 22,716,323  | 23,915,032  | 4 | 0 | 4 | 1 |
| Case 44 | 13 | 23,915,265  | 24,035,936  | 3 | 0 | 3 | 1 |
| Case 44 | 13 | 24,042,510  | 24,203,027  | 4 | 0 | 4 | 1 |
| Case 44 | 13 | 24,205,195  | 24,294,105  | 3 | 0 | 3 | 1 |
| Case 44 | 13 | 24,295,793  | 24,424,039  | 4 | 0 | 4 | 1 |
| Case 44 | 13 | 24,425,169  | 24,524,626  | 5 | 0 | 5 | 1 |
| Case 44 | 13 | 24,525,604  | 25,133,109  | 4 | 0 | 4 | 1 |
| Case 44 | 13 | 25,148,188  | 25,338,442  | 3 | 0 | 3 | 1 |
| Case 44 | 13 | 25,343,894  | 25,451,375  | 4 | 0 | 4 | 1 |
| Case 44 | 13 | 25,453,116  | 25,820,189  | 3 | 0 | 3 | 1 |
| Case 44 | 13 | 25,821,603  | 26,651,661  | 4 | 0 | 4 | 1 |
| Case 44 | 13 | 26,654,842  | 27,058,326  | 3 | 0 | 3 | 1 |
| Case 44 | 13 | 27,058,919  | 27,241,782  | 4 | 0 | 4 | 1 |
| Case 44 | 13 | 27,241,791  | 27,581,662  | 3 | 0 | 3 | 1 |
| Case 44 | 13 | 27,583,074  | 27,909,319  | 4 | 0 | 4 | 1 |
| Case 44 | 13 | 27,910,122  | 28,152,734  | 3 | 0 | 3 | 1 |
| Case 44 | 13 | 28,155,529  | 28,358,840  | 4 | 0 | 4 | 1 |

|         |    |            |            |   |   |   |   |
|---------|----|------------|------------|---|---|---|---|
| Case 44 | 13 | 28,360,487 | 28,556,252 | 3 | 0 | 3 | 1 |
| Case 44 | 13 | 28,558,163 | 28,874,262 | 4 | 0 | 4 | 1 |
| Case 44 | 13 | 28,875,789 | 30,540,231 | 3 | 0 | 3 | 1 |
| Case 44 | 13 | 30,552,901 | 30,769,735 | 4 | 0 | 4 | 1 |
| Case 44 | 13 | 30,770,760 | 30,829,622 | 5 | 0 | 5 | 1 |
| Case 44 | 13 | 30,829,650 | 31,231,872 | 4 | 0 | 4 | 1 |
| Case 44 | 13 | 31,231,886 | 32,259,041 | 3 | 0 | 3 | 1 |
| Case 44 | 13 | 32,270,907 | 32,773,559 | 4 | 0 | 4 | 1 |
| Case 44 | 13 | 32,776,542 | 32,896,846 | 3 | 0 | 3 | 1 |
| Case 44 | 13 | 32,900,279 | 33,541,005 | 4 | 0 | 4 | 1 |
| Case 44 | 13 | 33,544,511 | 33,837,836 | 3 | 0 | 3 | 1 |
| Case 44 | 13 | 33,842,296 | 34,801,969 | 4 | 0 | 4 | 1 |
| Case 44 | 13 | 34,815,910 | 35,431,868 | 3 | 0 | 3 | 1 |
| Case 44 | 13 | 35,434,797 | 36,229,873 | 4 | 0 | 4 | 1 |
| Case 44 | 13 | 36,236,428 | 37,988,791 | 3 | 0 | 3 | 1 |
| Case 44 | 13 | 37,990,293 | 38,158,993 | 4 | 0 | 4 | 1 |
| Case 44 | 13 | 38,159,633 | 40,253,741 | 3 | 0 | 3 | 1 |
| Case 44 | 13 | 40,257,949 | 40,631,198 | 4 | 0 | 4 | 1 |
| Case 44 | 13 | 40,634,061 | 41,134,019 | 3 | 0 | 3 | 1 |
| Case 44 | 13 | 41,134,096 | 43,681,427 | 4 | 0 | 4 | 1 |
| Case 44 | 13 | 43,681,963 | 43,930,337 | 3 | 0 | 3 | 1 |
| Case 44 | 13 | 43,932,798 | 44,700,290 | 4 | 0 | 4 | 1 |
| Case 44 | 13 | 44,702,605 | 45,404,442 | 3 | 0 | 3 | 1 |
| Case 44 | 13 | 45,409,251 | 46,282,275 | 4 | 0 | 4 | 1 |
| Case 44 | 13 | 46,282,761 | 46,563,074 | 3 | 0 | 3 | 1 |
| Case 44 | 13 | 46,563,128 | 46,946,076 | 4 | 0 | 4 | 1 |
| Case 44 | 13 | 46,946,099 | 47,337,846 | 3 | 0 | 3 | 1 |
| Case 44 | 13 | 47,345,330 | 47,854,082 | 4 | 0 | 4 | 1 |
| Case 44 | 13 | 47,854,508 | 49,073,796 | 5 | 0 | 5 | 1 |
| Case 44 | 13 | 49,076,863 | 49,430,822 | 4 | 0 | 4 | 1 |
| Case 44 | 13 | 49,431,829 | 51,565,316 | 5 | 0 | 5 | 1 |
| Case 44 | 13 | 51,571,545 | 51,921,510 | 4 | 0 | 4 | 1 |
| Case 44 | 13 | 51,924,375 | 52,097,959 | 5 | 0 | 5 | 1 |
| Case 44 | 13 | 52,100,822 | 52,684,475 | 4 | 0 | 4 | 1 |
| Case 44 | 13 | 52,684,492 | 53,277,894 | 5 | 0 | 5 | 1 |
| Case 44 | 13 | 53,278,680 | 54,142,688 | 4 | 0 | 4 | 1 |
| Case 44 | 13 | 54,146,159 | 59,770,846 | 5 | 0 | 5 | 1 |
| Case 44 | 13 | 59,774,430 | 60,242,095 | 4 | 0 | 4 | 1 |
| Case 44 | 13 | 60,249,797 | 61,141,669 | 5 | 0 | 5 | 1 |
| Case 44 | 13 | 61,141,696 | 61,603,054 | 4 | 0 | 4 | 1 |
| Case 44 | 13 | 61,625,083 | 61,984,781 | 5 | 0 | 5 | 1 |
| Case 44 | 13 | 61,985,401 | 62,008,597 | 4 | 0 | 4 | 1 |
| Case 44 | 13 | 62,012,673 | 67,798,928 | 5 | 0 | 5 | 1 |
| Case 44 | 13 | 67,799,329 | 67,932,513 | 4 | 0 | 4 | 1 |
| Case 44 | 13 | 67,932,941 | 76,377,622 | 5 | 0 | 5 | 1 |
| Case 44 | 13 | 76,378,436 | 76,444,390 | 4 | 0 | 4 | 1 |
| Case 44 | 13 | 76,445,189 | 77,003,686 | 5 | 0 | 5 | 1 |
| Case 44 | 13 | 77,029,851 | 77,570,156 | 4 | 0 | 4 | 1 |
| Case 44 | 13 | 77,573,046 | 78,315,295 | 5 | 0 | 5 | 1 |
| Case 44 | 13 | 78,318,599 | 78,492,734 | 4 | 0 | 4 | 1 |
| Case 44 | 13 | 78,499,569 | 86,309,366 | 5 | 0 | 5 | 1 |
| Case 44 | 13 | 86,312,117 | 86,386,087 | 4 | 0 | 4 | 1 |
| Case 44 | 13 | 86,386,146 | 88,299,219 | 5 | 0 | 5 | 1 |
| Case 44 | 13 | 88,303,033 | 88,539,103 | 4 | 0 | 4 | 1 |
| Case 44 | 13 | 88,539,816 | 89,030,355 | 5 | 0 | 5 | 1 |
| Case 44 | 13 | 89,033,066 | 89,393,187 | 4 | 0 | 4 | 1 |
| Case 44 | 13 | 89,404,414 | 91,674,153 | 5 | 0 | 5 | 1 |
| Case 44 | 13 | 91,679,413 | 92,383,193 | 4 | 0 | 4 | 1 |
| Case 44 | 13 | 92,387,661 | 93,746,969 | 5 | 0 | 5 | 1 |
| Case 44 | 13 | 93,748,609 | 94,067,286 | 4 | 0 | 4 | 1 |
| Case 44 | 13 | 94,068,036 | 94,959,454 | 5 | 0 | 5 | 1 |

|         |    |             |             |   |   |   |   |
|---------|----|-------------|-------------|---|---|---|---|
| Case 44 | 13 | 94,965,048  | 95,171,411  | 4 | 0 | 4 | 1 |
| Case 44 | 13 | 95,172,523  | 95,711,087  | 5 | 0 | 5 | 1 |
| Case 44 | 13 | 95,711,378  | 95,736,210  | 4 | 0 | 4 | 1 |
| Case 44 | 13 | 95,736,650  | 95,815,454  | 5 | 0 | 5 | 1 |
| Case 44 | 13 | 95,815,535  | 96,220,815  | 4 | 0 | 4 | 1 |
| Case 44 | 13 | 96,229,525  | 98,826,946  | 5 | 0 | 5 | 1 |
| Case 44 | 13 | 98,827,263  | 99,468,479  | 4 | 0 | 4 | 1 |
| Case 44 | 13 | 99,469,134  | 100,451,255 | 5 | 0 | 5 | 1 |
| Case 44 | 13 | 100,456,122 | 100,646,056 | 4 | 0 | 4 | 1 |
| Case 44 | 13 | 100,646,613 | 101,048,288 | 5 | 0 | 5 | 1 |
| Case 44 | 13 | 101,061,387 | 102,454,467 | 4 | 0 | 4 | 1 |
| Case 44 | 13 | 102,457,983 | 102,827,141 | 5 | 0 | 5 | 1 |
| Case 44 | 13 | 102,829,417 | 103,142,249 | 4 | 0 | 4 | 1 |
| Case 44 | 13 | 103,143,157 | 103,338,494 | 5 | 0 | 5 | 1 |
| Case 44 | 13 | 103,338,608 | 103,905,171 | 4 | 0 | 4 | 1 |
| Case 44 | 13 | 103,914,406 | 104,885,560 | 5 | 0 | 5 | 1 |
| Case 44 | 13 | 104,888,924 | 105,031,795 | 4 | 0 | 4 | 1 |
| Case 44 | 13 | 105,031,917 | 107,014,305 | 5 | 0 | 5 | 1 |
| Case 44 | 13 | 107,015,114 | 115,103,529 | 4 | 0 | 4 | 1 |
| Case 44 | 14 | 19,280,733  | 19,464,123  | 2 | 2 | 4 | 0 |
| Case 44 | 14 | 19,700,048  | 20,622,221  | 2 | 1 | 3 | 0 |
| Case 44 | 14 | 20,622,987  | 20,711,858  | 2 | 2 | 4 | 0 |
| Case 44 | 14 | 20,711,911  | 20,837,701  | 3 | 2 | 5 | 0 |
| Case 44 | 14 | 20,837,854  | 20,940,468  | 3 | 1 | 4 | 0 |
| Case 44 | 14 | 20,940,515  | 20,983,113  | 4 | 1 | 5 | 0 |
| Case 44 | 14 | 20,988,087  | 21,108,457  | 5 | 1 | 6 | 0 |
| Case 44 | 14 | 21,108,896  | 21,624,197  | 4 | 1 | 5 | 0 |
| Case 44 | 14 | 21,625,242  | 21,785,790  | 5 | 1 | 6 | 0 |
| Case 44 | 14 | 21,789,794  | 22,133,994  | 4 | 1 | 5 | 0 |
| Case 44 | 14 | 22,133,997  | 23,005,786  | 6 | 1 | 7 | 0 |
| Case 44 | 14 | 23,006,908  | 23,081,926  | 4 | 1 | 5 | 0 |
| Case 44 | 14 | 23,091,696  | 23,502,746  | 5 | 1 | 6 | 0 |
| Case 44 | 14 | 23,504,021  | 23,612,489  | 4 | 1 | 5 | 0 |
| Case 44 | 14 | 23,612,586  | 23,843,363  | 5 | 1 | 6 | 0 |
| Case 44 | 14 | 23,844,023  | 23,873,951  | 4 | 1 | 5 | 0 |
| Case 44 | 14 | 23,874,523  | 99,747,991  | 2 | 1 | 3 | 0 |
| Case 44 | 14 | 99,751,588  | 100,075,456 | 2 | 0 | 2 | 1 |
| Case 44 | 14 | 100,078,900 | 101,094,177 | 2 | 2 | 4 | 0 |
| Case 44 | 14 | 101,099,142 | 101,718,025 | 3 | 1 | 4 | 0 |
| Case 44 | 14 | 101,718,503 | 102,157,773 | 3 | 2 | 5 | 0 |
| Case 44 | 14 | 102,183,359 | 102,568,367 | 3 | 0 | 3 | 1 |
| Case 44 | 14 | 102,586,124 | 102,694,471 | 2 | 0 | 2 | 1 |
| Case 44 | 14 | 102,695,406 | 107,287,663 | 2 | 1 | 3 | 0 |
| Case 44 | 15 | 20,034,919  | 20,212,798  | 0 | 0 | 0 | 0 |
| Case 44 | 15 | 20,612,840  | 22,652,330  | 3 | 0 | 3 | 1 |
| Case 44 | 15 | 22,750,305  | 32,418,038  | 2 | 0 | 2 | 1 |
| Case 44 | 15 | 32,439,298  | 32,929,104  | 3 | 0 | 3 | 1 |
| Case 44 | 15 | 32,929,312  | 33,191,049  | 2 | 0 | 2 | 1 |
| Case 44 | 15 | 33,194,125  | 33,294,217  | 3 | 0 | 3 | 1 |
| Case 44 | 15 | 33,298,235  | 37,236,342  | 2 | 0 | 2 | 1 |
| Case 44 | 15 | 37,240,506  | 37,332,109  | 3 | 0 | 3 | 1 |
| Case 44 | 15 | 37,335,057  | 39,910,404  | 2 | 0 | 2 | 1 |
| Case 44 | 15 | 39,910,431  | 40,509,803  | 3 | 0 | 3 | 1 |
| Case 44 | 15 | 40,512,818  | 40,885,107  | 2 | 0 | 2 | 1 |
| Case 44 | 15 | 40,886,553  | 40,947,116  | 3 | 0 | 3 | 1 |
| Case 44 | 15 | 40,947,164  | 41,276,035  | 2 | 0 | 2 | 1 |
| Case 44 | 15 | 41,276,158  | 41,772,510  | 3 | 0 | 3 | 1 |
| Case 44 | 15 | 41,774,423  | 41,827,745  | 2 | 0 | 2 | 1 |
| Case 44 | 15 | 41,827,757  | 42,107,578  | 3 | 0 | 3 | 1 |
| Case 44 | 15 | 42,107,924  | 42,227,441  | 2 | 0 | 2 | 1 |
| Case 44 | 15 | 42,229,041  | 43,086,885  | 4 | 0 | 4 | 1 |

|         |    |             |             |   |   |   |   |
|---------|----|-------------|-------------|---|---|---|---|
| Case 44 | 15 | 43,097,652  | 43,485,930  | 5 | 0 | 5 | 1 |
| Case 44 | 15 | 43,489,532  | 44,245,931  | 4 | 0 | 4 | 1 |
| Case 44 | 15 | 44,247,056  | 44,943,797  | 5 | 0 | 5 | 1 |
| Case 44 | 15 | 44,943,875  | 45,847,921  | 4 | 0 | 4 | 1 |
| Case 44 | 15 | 45,872,269  | 50,921,292  | 2 | 0 | 2 | 1 |
| Case 44 | 15 | 50,929,645  | 51,500,835  | 3 | 0 | 3 | 1 |
| Case 44 | 15 | 51,502,844  | 52,564,893  | 2 | 0 | 2 | 1 |
| Case 44 | 15 | 52,567,631  | 53,001,538  | 3 | 0 | 3 | 1 |
| Case 44 | 15 | 53,002,685  | 56,657,796  | 2 | 0 | 2 | 1 |
| Case 44 | 15 | 56,657,826  | 57,645,324  | 3 | 0 | 3 | 1 |
| Case 44 | 15 | 57,645,519  | 57,874,494  | 2 | 0 | 2 | 1 |
| Case 44 | 15 | 57,876,962  | 58,253,231  | 3 | 0 | 3 | 1 |
| Case 44 | 15 | 58,253,269  | 58,504,678  | 2 | 0 | 2 | 1 |
| Case 44 | 15 | 58,506,421  | 58,648,371  | 3 | 0 | 3 | 1 |
| Case 44 | 15 | 58,649,477  | 58,858,025  | 2 | 0 | 2 | 1 |
| Case 44 | 15 | 58,858,910  | 61,104,895  | 3 | 0 | 3 | 1 |
| Case 44 | 15 | 61,105,886  | 61,682,934  | 2 | 0 | 2 | 1 |
| Case 44 | 15 | 61,684,980  | 61,845,418  | 3 | 0 | 3 | 1 |
| Case 44 | 15 | 61,845,512  | 62,146,598  | 2 | 0 | 2 | 1 |
| Case 44 | 15 | 62,147,087  | 62,427,674  | 3 | 0 | 3 | 1 |
| Case 44 | 15 | 62,427,973  | 63,414,116  | 2 | 0 | 2 | 1 |
| Case 44 | 15 | 63,414,813  | 63,743,953  | 3 | 0 | 3 | 1 |
| Case 44 | 15 | 63,747,396  | 63,880,962  | 4 | 0 | 4 | 1 |
| Case 44 | 15 | 63,882,919  | 101,900,203 | 3 | 0 | 3 | 1 |
| Case 44 | 15 | 101,903,153 | 102,194,288 | 2 | 0 | 2 | 1 |
| Case 44 | 15 | 102,194,813 | 102,277,592 | 3 | 0 | 3 | 1 |
| Case 44 | 15 | 102,288,471 | 102,461,162 | 2 | 0 | 2 | 1 |
| Case 44 | 16 | 88,165      | 1,842,516   | 2 | 0 | 2 | 1 |
| Case 44 | 16 | 1,849,916   | 1,943,418   | 3 | 0 | 3 | 1 |
| Case 44 | 16 | 1,946,062   | 2,329,121   | 2 | 0 | 2 | 1 |
| Case 44 | 16 | 2,331,173   | 2,498,978   | 3 | 0 | 3 | 1 |
| Case 44 | 16 | 2,500,844   | 2,807,263   | 2 | 0 | 2 | 1 |
| Case 44 | 16 | 2,807,922   | 2,817,599   | 3 | 0 | 3 | 1 |
| Case 44 | 16 | 2,817,983   | 3,266,552   | 2 | 0 | 2 | 1 |
| Case 44 | 16 | 3,269,932   | 3,293,922   | 3 | 0 | 3 | 1 |
| Case 44 | 16 | 3,294,255   | 3,340,845   | 2 | 0 | 2 | 1 |
| Case 44 | 16 | 3,344,618   | 3,406,198   | 3 | 0 | 3 | 1 |
| Case 44 | 16 | 3,406,340   | 3,650,429   | 2 | 0 | 2 | 1 |
| Case 44 | 16 | 3,650,510   | 3,695,354   | 3 | 0 | 3 | 1 |
| Case 44 | 16 | 3,701,824   | 4,003,054   | 2 | 0 | 2 | 1 |
| Case 44 | 16 | 4,007,086   | 4,133,076   | 3 | 0 | 3 | 1 |
| Case 44 | 16 | 4,135,350   | 4,864,538   | 2 | 0 | 2 | 1 |
| Case 44 | 16 | 4,864,570   | 4,918,326   | 3 | 0 | 3 | 1 |
| Case 44 | 16 | 4,919,596   | 5,608,833   | 2 | 0 | 2 | 1 |
| Case 44 | 16 | 5,609,707   | 5,785,307   | 3 | 0 | 3 | 1 |
| Case 44 | 16 | 5,786,389   | 11,298,850  | 2 | 0 | 2 | 1 |
| Case 44 | 16 | 11,299,077  | 11,396,350  | 3 | 0 | 3 | 1 |
| Case 44 | 16 | 11,403,893  | 11,826,841  | 2 | 0 | 2 | 1 |
| Case 44 | 16 | 11,828,018  | 12,082,233  | 3 | 0 | 3 | 1 |
| Case 44 | 16 | 12,084,047  | 19,049,253  | 2 | 0 | 2 | 1 |
| Case 44 | 16 | 19,049,346  | 19,471,665  | 3 | 0 | 3 | 1 |
| Case 44 | 16 | 19,473,265  | 19,534,262  | 2 | 0 | 2 | 1 |
| Case 44 | 16 | 19,534,925  | 19,691,514  | 3 | 0 | 3 | 1 |
| Case 44 | 16 | 19,693,593  | 20,439,568  | 2 | 0 | 2 | 1 |
| Case 44 | 16 | 20,441,013  | 20,568,843  | 3 | 0 | 3 | 1 |
| Case 44 | 16 | 20,573,575  | 21,098,323  | 2 | 0 | 2 | 1 |
| Case 44 | 16 | 21,104,170  | 21,211,039  | 3 | 0 | 3 | 1 |
| Case 44 | 16 | 21,211,138  | 21,734,417  | 2 | 0 | 2 | 1 |
| Case 44 | 16 | 21,737,414  | 22,105,597  | 3 | 0 | 3 | 1 |
| Case 44 | 16 | 22,110,772  | 22,360,712  | 2 | 0 | 2 | 1 |
| Case 44 | 16 | 22,361,172  | 22,795,449  | 3 | 0 | 3 | 1 |

|         |    |            |            |   |   |   |   |
|---------|----|------------|------------|---|---|---|---|
| Case 44 | 16 | 22,797,852 | 31,737,373 | 2 | 0 | 2 | 1 |
| Case 44 | 16 | 31,743,663 | 33,460,718 | 3 | 0 | 3 | 1 |
| Case 44 | 16 | 33,557,021 | 35,285,582 | 2 | 0 | 2 | 1 |
| Case 44 | 16 | 46,450,037 | 66,549,280 | 2 | 0 | 2 | 1 |
| Case 44 | 16 | 66,551,110 | 66,857,451 | 3 | 0 | 3 | 1 |
| Case 44 | 16 | 66,860,993 | 68,156,733 | 2 | 0 | 2 | 1 |
| Case 44 | 16 | 68,156,751 | 68,343,969 | 3 | 0 | 3 | 1 |
| Case 44 | 16 | 68,344,329 | 68,772,239 | 2 | 0 | 2 | 1 |
| Case 44 | 16 | 68,772,681 | 69,511,343 | 3 | 0 | 3 | 1 |
| Case 44 | 16 | 69,513,835 | 69,564,497 | 2 | 0 | 2 | 1 |
| Case 44 | 16 | 69,586,228 | 69,892,430 | 3 | 0 | 3 | 1 |
| Case 44 | 16 | 69,895,286 | 70,524,256 | 2 | 0 | 2 | 1 |
| Case 44 | 16 | 70,528,224 | 70,688,459 | 3 | 0 | 3 | 1 |
| Case 44 | 16 | 70,690,511 | 70,841,656 | 2 | 0 | 2 | 1 |
| Case 44 | 16 | 70,841,658 | 71,052,311 | 2 | 1 | 3 | 0 |
| Case 44 | 16 | 71,054,116 | 71,224,681 | 3 | 0 | 3 | 1 |
| Case 44 | 16 | 71,244,275 | 74,130,928 | 2 | 0 | 2 | 1 |
| Case 44 | 16 | 74,130,985 | 74,708,900 | 3 | 0 | 3 | 1 |
| Case 44 | 16 | 74,708,906 | 74,829,373 | 2 | 0 | 2 | 1 |
| Case 44 | 16 | 74,831,956 | 74,938,083 | 3 | 0 | 3 | 1 |
| Case 44 | 16 | 74,940,366 | 75,699,981 | 2 | 0 | 2 | 1 |
| Case 44 | 16 | 75,717,930 | 76,297,606 | 3 | 0 | 3 | 1 |
| Case 44 | 16 | 76,311,574 | 81,241,220 | 2 | 0 | 2 | 1 |
| Case 44 | 16 | 81,242,097 | 81,470,018 | 3 | 0 | 3 | 1 |
| Case 44 | 16 | 81,471,654 | 82,160,399 | 2 | 0 | 2 | 1 |
| Case 44 | 16 | 82,160,951 | 82,451,159 | 3 | 0 | 3 | 1 |
| Case 44 | 16 | 82,454,743 | 84,623,402 | 2 | 0 | 2 | 1 |
| Case 44 | 16 | 84,623,989 | 84,793,502 | 3 | 0 | 3 | 1 |
| Case 44 | 16 | 84,794,632 | 85,996,295 | 2 | 0 | 2 | 1 |
| Case 44 | 16 | 85,997,281 | 86,094,754 | 3 | 0 | 3 | 1 |
| Case 44 | 16 | 86,095,113 | 87,191,166 | 2 | 0 | 2 | 1 |
| Case 44 | 16 | 87,199,038 | 87,575,332 | 3 | 0 | 3 | 1 |
| Case 44 | 16 | 87,575,619 | 87,908,401 | 2 | 0 | 2 | 1 |
| Case 44 | 16 | 87,911,909 | 88,185,911 | 3 | 0 | 3 | 1 |
| Case 44 | 16 | 88,198,214 | 88,633,354 | 2 | 0 | 2 | 1 |
| Case 44 | 16 | 88,633,978 | 88,689,677 | 3 | 0 | 3 | 1 |
| Case 44 | 16 | 88,691,018 | 89,347,431 | 2 | 0 | 2 | 1 |
| Case 44 | 16 | 89,347,440 | 89,614,451 | 3 | 0 | 3 | 1 |
| Case 44 | 16 | 89,619,540 | 89,813,093 | 2 | 0 | 2 | 1 |
| Case 44 | 16 | 89,814,188 | 89,877,200 | 3 | 0 | 3 | 1 |
| Case 44 | 16 | 89,877,386 | 90,123,493 | 2 | 0 | 2 | 1 |
| Case 44 | 16 | 90,123,732 | 90,274,695 | 3 | 0 | 3 | 1 |
| Case 44 | 17 | 11,885     | 17,786,137 | 3 | 0 | 3 | 1 |
| Case 44 | 17 | 17,788,344 | 19,180,190 | 4 | 0 | 4 | 1 |
| Case 44 | 17 | 19,186,967 | 21,810,779 | 3 | 0 | 3 | 1 |
| Case 44 | 17 | 21,825,993 | 22,242,355 | 4 | 0 | 4 | 1 |
| Case 44 | 17 | 25,268,142 | 25,956,348 | 2 | 1 | 3 | 0 |
| Case 44 | 17 | 25,957,334 | 26,099,363 | 3 | 0 | 3 | 1 |
| Case 44 | 17 | 26,100,144 | 29,038,032 | 2 | 1 | 3 | 0 |
| Case 44 | 17 | 29,047,285 | 45,406,167 | 2 | 2 | 4 | 0 |
| Case 44 | 17 | 45,406,345 | 45,704,031 | 3 | 2 | 5 | 0 |
| Case 44 | 17 | 45,707,871 | 48,119,457 | 2 | 2 | 4 | 0 |
| Case 44 | 17 | 48,122,322 | 48,849,868 | 4 | 1 | 5 | 0 |
| Case 44 | 17 | 48,851,094 | 51,035,455 | 2 | 2 | 4 | 0 |
| Case 44 | 17 | 51,039,012 | 51,665,573 | 3 | 2 | 5 | 0 |
| Case 44 | 17 | 51,668,721 | 61,006,885 | 2 | 2 | 4 | 0 |
| Case 44 | 17 | 61,008,762 | 61,384,439 | 3 | 2 | 5 | 0 |
| Case 44 | 17 | 61,391,652 | 63,905,236 | 2 | 2 | 4 | 0 |
| Case 44 | 17 | 63,914,750 | 64,202,857 | 3 | 2 | 5 | 0 |
| Case 44 | 17 | 64,206,634 | 67,189,302 | 2 | 2 | 4 | 0 |
| Case 44 | 17 | 67,189,973 | 67,318,946 | 3 | 2 | 5 | 0 |



|         |    |            |            |   |   |   |   |
|---------|----|------------|------------|---|---|---|---|
| Case 44 | 17 | 67,319,561 | 68,342,067 | 2 | 2 | 4 | 0 |
| Case 44 | 17 | 68,344,483 | 68,684,942 | 3 | 2 | 5 | 0 |
| Case 44 | 17 | 68,686,549 | 69,061,741 | 2 | 2 | 4 | 0 |
| Case 44 | 17 | 69,061,947 | 69,541,721 | 3 | 2 | 5 | 0 |
| Case 44 | 17 | 69,542,130 | 81,060,040 | 2 | 2 | 4 | 0 |
| Case 44 | 18 | 87,505     | 2,881,839  | 5 | 0 | 5 | 1 |
| Case 44 | 18 | 2,885,110  | 2,913,187  | 4 | 0 | 4 | 1 |
| Case 44 | 18 | 2,913,211  | 5,391,181  | 5 | 0 | 5 | 1 |
| Case 44 | 18 | 5,395,098  | 5,416,221  | 4 | 0 | 4 | 1 |
| Case 44 | 18 | 5,417,183  | 6,926,854  | 5 | 0 | 5 | 1 |
| Case 44 | 18 | 6,928,180  | 7,257,071  | 4 | 0 | 4 | 1 |
| Case 44 | 18 | 7,264,395  | 8,778,916  | 5 | 0 | 5 | 1 |
| Case 44 | 18 | 8,781,129  | 8,830,080  | 4 | 0 | 4 | 1 |
| Case 44 | 18 | 8,830,096  | 14,902,902 | 5 | 0 | 5 | 1 |
| Case 44 | 18 | 14,903,483 | 15,375,878 | 4 | 0 | 4 | 1 |
| Case 44 | 18 | 18,520,354 | 22,916,721 | 4 | 0 | 4 | 1 |
| Case 44 | 18 | 22,918,008 | 23,490,176 | 3 | 0 | 3 | 1 |
| Case 44 | 18 | 23,494,445 | 24,441,163 | 4 | 0 | 4 | 1 |
| Case 44 | 18 | 24,442,210 | 24,591,905 | 3 | 0 | 3 | 1 |
| Case 44 | 18 | 24,592,701 | 25,237,664 | 4 | 0 | 4 | 1 |
| Case 44 | 18 | 25,238,114 | 26,166,575 | 3 | 0 | 3 | 1 |
| Case 44 | 18 | 26,170,472 | 26,690,898 | 4 | 0 | 4 | 1 |
| Case 44 | 18 | 26,711,308 | 27,009,556 | 3 | 0 | 3 | 1 |
| Case 44 | 18 | 27,014,331 | 29,105,117 | 4 | 0 | 4 | 1 |
| Case 44 | 18 | 29,108,706 | 29,178,618 | 3 | 0 | 3 | 1 |
| Case 44 | 18 | 29,186,128 | 30,246,217 | 4 | 0 | 4 | 1 |
| Case 44 | 18 | 30,249,433 | 31,319,905 | 0 | 0 | 0 | 0 |
| Case 44 | 18 | 31,319,947 | 31,319,947 | 2 | 0 | 2 | 1 |
| Case 44 | 18 | 31,320,069 | 31,325,175 | 1 | 0 | 1 | 0 |
| Case 44 | 18 | 31,325,525 | 31,325,525 | 2 | 0 | 2 | 1 |
| Case 44 | 18 | 31,326,012 | 31,718,525 | 0 | 0 | 0 | 0 |
| Case 44 | 18 | 31,738,649 | 31,738,649 | 3 | 0 | 3 | 1 |
| Case 44 | 18 | 31,748,225 | 32,815,683 | 4 | 0 | 4 | 1 |
| Case 44 | 18 | 32,822,382 | 40,058,395 | 3 | 0 | 3 | 1 |
| Case 44 | 18 | 40,058,882 | 40,482,403 | 4 | 0 | 4 | 1 |
| Case 44 | 18 | 40,483,622 | 41,613,943 | 3 | 0 | 3 | 1 |
| Case 44 | 18 | 41,626,891 | 41,904,325 | 4 | 0 | 4 | 1 |
| Case 44 | 18 | 41,906,424 | 44,644,530 | 3 | 0 | 3 | 1 |
| Case 44 | 18 | 44,656,675 | 44,799,515 | 4 | 0 | 4 | 1 |
| Case 44 | 18 | 44,802,581 | 46,532,088 | 3 | 0 | 3 | 1 |
| Case 44 | 18 | 46,539,469 | 47,008,746 | 4 | 0 | 4 | 1 |
| Case 44 | 18 | 47,010,017 | 47,607,260 | 3 | 0 | 3 | 1 |
| Case 44 | 18 | 47,614,050 | 48,157,253 | 4 | 0 | 4 | 1 |
| Case 44 | 18 | 48,158,618 | 48,291,585 | 3 | 0 | 3 | 1 |
| Case 44 | 18 | 48,297,005 | 48,928,763 | 4 | 0 | 4 | 1 |
| Case 44 | 18 | 48,929,023 | 51,796,976 | 3 | 0 | 3 | 1 |
| Case 44 | 18 | 51,800,403 | 52,758,295 | 4 | 0 | 4 | 1 |
| Case 44 | 18 | 52,759,825 | 53,948,968 | 3 | 0 | 3 | 1 |
| Case 44 | 18 | 53,950,927 | 54,693,531 | 4 | 0 | 4 | 1 |
| Case 44 | 18 | 54,694,151 | 55,150,557 | 3 | 0 | 3 | 1 |
| Case 44 | 18 | 55,152,454 | 55,968,567 | 4 | 0 | 4 | 1 |
| Case 44 | 18 | 55,968,698 | 56,247,440 | 3 | 0 | 3 | 1 |
| Case 44 | 18 | 56,247,551 | 56,723,196 | 4 | 0 | 4 | 1 |
| Case 44 | 18 | 56,724,261 | 57,705,988 | 3 | 0 | 3 | 1 |
| Case 44 | 18 | 57,707,051 | 64,235,710 | 4 | 0 | 4 | 1 |
| Case 44 | 18 | 64,235,877 | 64,480,206 | 3 | 0 | 3 | 1 |
| Case 44 | 18 | 64,486,484 | 64,958,808 | 4 | 0 | 4 | 1 |
| Case 44 | 18 | 64,967,357 | 65,339,348 | 3 | 0 | 3 | 1 |
| Case 44 | 18 | 65,340,378 | 70,472,285 | 4 | 0 | 4 | 1 |
| Case 44 | 18 | 70,473,328 | 70,725,830 | 3 | 0 | 3 | 1 |
| Case 44 | 18 | 70,734,708 | 70,916,012 | 4 | 0 | 4 | 1 |

|         |    |            |            |   |   |   |   |
|---------|----|------------|------------|---|---|---|---|
| Case 44 | 18 | 70,916,559 | 71,074,190 | 3 | 0 | 3 | 1 |
| Case 44 | 18 | 71,075,349 | 71,330,683 | 4 | 0 | 4 | 1 |
| Case 44 | 18 | 71,338,552 | 72,452,702 | 3 | 0 | 3 | 1 |
| Case 44 | 18 | 72,454,793 | 72,731,138 | 4 | 0 | 4 | 1 |
| Case 44 | 18 | 72,734,429 | 76,813,958 | 3 | 0 | 3 | 1 |
| Case 44 | 18 | 76,817,189 | 77,138,172 | 4 | 0 | 4 | 1 |
| Case 44 | 18 | 77,139,494 | 78,015,180 | 3 | 0 | 3 | 1 |
| Case 44 | 19 | 260,912    | 288,109    | 3 | 0 | 3 | 1 |
| Case 44 | 19 | 288,123    | 896,244    | 2 | 0 | 2 | 1 |
| Case 44 | 19 | 896,499    | 1,008,504  | 3 | 0 | 3 | 1 |
| Case 44 | 19 | 1,008,645  | 2,836,660  | 2 | 0 | 2 | 1 |
| Case 44 | 19 | 2,843,533  | 2,933,747  | 3 | 0 | 3 | 1 |
| Case 44 | 19 | 2,933,929  | 5,711,996  | 2 | 0 | 2 | 1 |
| Case 44 | 19 | 5,713,169  | 5,751,661  | 3 | 0 | 3 | 1 |
| Case 44 | 19 | 5,751,687  | 15,164,601 | 2 | 0 | 2 | 1 |
| Case 44 | 19 | 15,164,749 | 15,203,866 | 3 | 0 | 3 | 1 |
| Case 44 | 19 | 15,205,503 | 15,794,349 | 2 | 0 | 2 | 1 |
| Case 44 | 19 | 15,794,352 | 15,807,212 | 3 | 0 | 3 | 1 |
| Case 44 | 19 | 15,807,720 | 24,629,285 | 2 | 0 | 2 | 1 |
| Case 44 | 19 | 27,732,159 | 27,801,814 | 2 | 0 | 2 | 1 |
| Case 44 | 19 | 27,828,664 | 28,079,145 | 3 | 0 | 3 | 1 |
| Case 44 | 19 | 28,095,812 | 28,379,160 | 2 | 0 | 2 | 1 |
| Case 44 | 19 | 28,384,773 | 28,641,196 | 3 | 0 | 3 | 1 |
| Case 44 | 19 | 28,643,967 | 28,822,169 | 4 | 0 | 4 | 1 |
| Case 44 | 19 | 28,832,269 | 29,279,929 | 2 | 0 | 2 | 1 |
| Case 44 | 19 | 29,283,045 | 30,432,298 | 4 | 0 | 4 | 1 |
| Case 44 | 19 | 30,448,600 | 30,539,739 | 5 | 0 | 5 | 1 |
| Case 44 | 19 | 30,546,184 | 30,882,535 | 4 | 0 | 4 | 1 |
| Case 44 | 19 | 30,884,407 | 33,320,468 | 2 | 0 | 2 | 1 |
| Case 44 | 19 | 33,321,213 | 33,615,122 | 3 | 0 | 3 | 1 |
| Case 44 | 19 | 33,616,059 | 33,795,241 | 2 | 0 | 2 | 1 |
| Case 44 | 19 | 33,806,024 | 33,878,347 | 3 | 0 | 3 | 1 |
| Case 44 | 19 | 33,878,837 | 34,332,765 | 2 | 0 | 2 | 1 |
| Case 44 | 19 | 34,333,501 | 34,375,631 | 3 | 0 | 3 | 1 |
| Case 44 | 19 | 34,376,018 | 34,469,223 | 2 | 0 | 2 | 1 |
| Case 44 | 19 | 34,469,289 | 34,766,588 | 3 | 0 | 3 | 1 |
| Case 44 | 19 | 34,789,008 | 35,169,540 | 2 | 0 | 2 | 1 |
| Case 44 | 19 | 35,173,793 | 35,302,088 | 3 | 0 | 3 | 1 |
| Case 44 | 19 | 35,307,193 | 38,989,881 | 2 | 0 | 2 | 1 |
| Case 44 | 19 | 38,989,882 | 39,087,776 | 3 | 0 | 3 | 1 |
| Case 44 | 19 | 39,091,033 | 39,433,354 | 2 | 0 | 2 | 1 |
| Case 44 | 19 | 39,433,355 | 39,584,399 | 3 | 0 | 3 | 1 |
| Case 44 | 19 | 39,589,242 | 40,046,086 | 2 | 0 | 2 | 1 |
| Case 44 | 19 | 40,046,863 | 40,225,646 | 3 | 0 | 3 | 1 |
| Case 44 | 19 | 40,225,783 | 41,393,760 | 2 | 0 | 2 | 1 |
| Case 44 | 19 | 41,403,325 | 41,703,660 | 3 | 0 | 3 | 1 |
| Case 44 | 19 | 41,703,792 | 41,983,822 | 2 | 0 | 2 | 1 |
| Case 44 | 19 | 41,985,587 | 42,342,987 | 3 | 0 | 3 | 1 |
| Case 44 | 19 | 42,342,993 | 44,376,849 | 2 | 0 | 2 | 1 |
| Case 44 | 19 | 44,377,048 | 44,413,463 | 3 | 0 | 3 | 1 |
| Case 44 | 19 | 44,416,199 | 44,833,888 | 2 | 0 | 2 | 1 |
| Case 44 | 19 | 44,834,011 | 45,015,212 | 3 | 0 | 3 | 1 |
| Case 44 | 19 | 45,015,596 | 46,066,318 | 2 | 0 | 2 | 1 |
| Case 44 | 19 | 46,070,854 | 46,180,184 | 3 | 0 | 3 | 1 |
| Case 44 | 19 | 46,180,223 | 47,305,760 | 2 | 0 | 2 | 1 |
| Case 44 | 19 | 47,308,666 | 47,511,992 | 3 | 0 | 3 | 1 |
| Case 44 | 19 | 47,516,459 | 47,883,016 | 2 | 0 | 2 | 1 |
| Case 44 | 19 | 47,883,105 | 47,970,406 | 3 | 0 | 3 | 1 |
| Case 44 | 19 | 47,977,877 | 48,374,551 | 2 | 0 | 2 | 1 |
| Case 44 | 19 | 48,374,734 | 48,609,818 | 3 | 0 | 3 | 1 |
| Case 44 | 19 | 48,618,941 | 49,183,284 | 2 | 0 | 2 | 1 |

|         |    |            |            |   |   |   |   |
|---------|----|------------|------------|---|---|---|---|
| Case 44 | 19 | 49,184,380 | 49,206,462 | 0 | 0 | 0 | 0 |
| Case 44 | 19 | 49,206,631 | 49,217,732 | 2 | 0 | 2 | 1 |
| Case 44 | 19 | 49,224,107 | 49,344,548 | 3 | 0 | 3 | 1 |
| Case 44 | 19 | 49,347,708 | 49,515,287 | 2 | 0 | 2 | 1 |
| Case 44 | 19 | 49,517,213 | 49,643,537 | 3 | 0 | 3 | 1 |
| Case 44 | 19 | 49,644,685 | 49,663,789 | 2 | 0 | 2 | 1 |
| Case 44 | 19 | 49,667,351 | 50,309,974 | 2 | 2 | 4 | 0 |
| Case 44 | 19 | 50,310,427 | 50,436,980 | 2 | 1 | 3 | 0 |
| Case 44 | 19 | 50,439,719 | 51,797,119 | 2 | 2 | 4 | 0 |
| Case 44 | 19 | 51,800,341 | 52,004,903 | 2 | 1 | 3 | 0 |
| Case 44 | 19 | 52,005,669 | 52,666,323 | 2 | 2 | 4 | 0 |
| Case 44 | 19 | 52,668,414 | 53,209,289 | 2 | 1 | 3 | 0 |
| Case 44 | 19 | 53,209,712 | 54,373,081 | 2 | 2 | 4 | 0 |
| Case 44 | 19 | 54,378,029 | 54,494,763 | 2 | 1 | 3 | 0 |
| Case 44 | 19 | 54,495,932 | 54,597,029 | 2 | 2 | 4 | 0 |
| Case 44 | 19 | 54,598,604 | 54,760,105 | 2 | 1 | 3 | 0 |
| Case 44 | 19 | 54,760,189 | 54,921,227 | 2 | 2 | 4 | 0 |
| Case 44 | 19 | 54,930,361 | 54,974,055 | 2 | 1 | 3 | 0 |
| Case 44 | 19 | 54,974,084 | 55,081,592 | 2 | 2 | 4 | 0 |
| Case 44 | 19 | 55,084,512 | 55,183,869 | 2 | 1 | 3 | 0 |
| Case 44 | 19 | 55,183,977 | 55,810,567 | 2 | 2 | 4 | 0 |
| Case 44 | 19 | 55,814,881 | 56,047,448 | 2 | 1 | 3 | 0 |
| Case 44 | 19 | 56,047,475 | 56,130,705 | 2 | 2 | 4 | 0 |
| Case 44 | 19 | 56,132,487 | 56,215,439 | 2 | 1 | 3 | 0 |
| Case 44 | 19 | 56,219,377 | 56,671,392 | 2 | 2 | 4 | 0 |
| Case 44 | 19 | 56,671,836 | 56,736,256 | 2 | 1 | 3 | 0 |
| Case 44 | 19 | 56,736,269 | 57,279,391 | 2 | 2 | 4 | 0 |
| Case 44 | 19 | 57,281,577 | 57,344,913 | 2 | 1 | 3 | 0 |
| Case 44 | 19 | 57,359,432 | 57,641,508 | 2 | 2 | 4 | 0 |
| Case 44 | 19 | 57,641,799 | 58,153,465 | 2 | 1 | 3 | 0 |
| Case 44 | 19 | 58,153,533 | 58,772,917 | 2 | 2 | 4 | 0 |
| Case 44 | 19 | 58,773,014 | 58,868,480 | 2 | 1 | 3 | 0 |
| Case 44 | 19 | 58,868,830 | 59,097,160 | 2 | 2 | 4 | 0 |
| Case 44 | 20 | 63,244     | 257,899    | 3 | 0 | 3 | 1 |
| Case 44 | 20 | 258,001    | 602,622    | 2 | 0 | 2 | 1 |
| Case 44 | 20 | 603,620    | 782,706    | 4 | 1 | 5 | 0 |
| Case 44 | 20 | 783,864    | 791,745    | 5 | 1 | 6 | 0 |
| Case 44 | 20 | 791,957    | 1,188,386  | 4 | 1 | 5 | 0 |
| Case 44 | 20 | 1,189,334  | 1,364,521  | 5 | 1 | 6 | 0 |
| Case 44 | 20 | 1,367,535  | 1,931,582  | 4 | 1 | 5 | 0 |
| Case 44 | 20 | 1,934,468  | 1,941,488  | 6 | 1 | 7 | 0 |
| Case 44 | 20 | 1,942,718  | 3,339,581  | 4 | 1 | 5 | 0 |
| Case 44 | 20 | 3,346,954  | 3,673,557  | 5 | 1 | 6 | 0 |
| Case 44 | 20 | 3,673,677  | 3,905,730  | 4 | 1 | 5 | 0 |
| Case 44 | 20 | 3,911,270  | 5,896,996  | 5 | 1 | 6 | 0 |
| Case 44 | 20 | 5,897,505  | 5,915,922  | 4 | 1 | 5 | 0 |
| Case 44 | 20 | 5,916,200  | 5,966,578  | 6 | 1 | 7 | 0 |
| Case 44 | 20 | 5,966,626  | 7,519,612  | 4 | 1 | 5 | 0 |
| Case 44 | 20 | 7,533,180  | 7,700,108  | 5 | 1 | 6 | 0 |
| Case 44 | 20 | 7,700,582  | 8,464,286  | 3 | 2 | 5 | 0 |
| Case 44 | 20 | 8,469,881  | 13,873,821 | 4 | 1 | 5 | 0 |
| Case 44 | 20 | 13,883,278 | 14,576,448 | 2 | 2 | 4 | 0 |
| Case 44 | 20 | 14,579,703 | 14,847,907 | 2 | 0 | 2 | 1 |
| Case 44 | 20 | 14,853,050 | 24,742,663 | 2 | 2 | 4 | 0 |
| Case 44 | 20 | 24,745,478 | 24,994,664 | 2 | 1 | 3 | 0 |
| Case 44 | 20 | 24,994,676 | 25,181,074 | 2 | 2 | 4 | 0 |
| Case 44 | 20 | 25,184,466 | 25,657,276 | 2 | 1 | 3 | 0 |
| Case 44 | 20 | 25,657,370 | 26,293,985 | 2 | 2 | 4 | 0 |
| Case 44 | 20 | 29,425,357 | 33,441,257 | 2 | 2 | 4 | 0 |
| Case 44 | 20 | 33,447,262 | 33,590,096 | 2 | 1 | 3 | 0 |
| Case 44 | 20 | 33,590,417 | 33,864,484 | 2 | 2 | 4 | 0 |

|         |    |            |            |   |   |   |   |
|---------|----|------------|------------|---|---|---|---|
| Case 44 | 20 | 33,867,697 | 34,220,563 | 2 | 1 | 3 | 0 |
| Case 44 | 20 | 34,220,740 | 36,839,297 | 2 | 2 | 4 | 0 |
| Case 44 | 20 | 36,840,156 | 36,900,290 | 2 | 1 | 3 | 0 |
| Case 44 | 20 | 36,911,367 | 44,521,044 | 2 | 2 | 4 | 0 |
| Case 44 | 20 | 44,521,386 | 44,596,403 | 2 | 1 | 3 | 0 |
| Case 44 | 20 | 44,596,938 | 45,771,708 | 2 | 2 | 4 | 0 |
| Case 44 | 20 | 45,773,420 | 45,906,136 | 2 | 1 | 3 | 0 |
| Case 44 | 20 | 45,920,070 | 46,545,161 | 3 | 1 | 4 | 0 |
| Case 44 | 20 | 46,546,929 | 46,772,898 | 3 | 2 | 5 | 0 |
| Case 44 | 20 | 46,773,023 | 47,394,788 | 3 | 1 | 4 | 0 |
| Case 44 | 20 | 47,395,325 | 47,721,092 | 3 | 2 | 5 | 0 |
| Case 44 | 20 | 47,731,767 | 48,231,141 | 3 | 1 | 4 | 0 |
| Case 44 | 20 | 48,235,673 | 48,506,190 | 3 | 2 | 5 | 0 |
| Case 44 | 20 | 48,519,224 | 48,929,329 | 3 | 1 | 4 | 0 |
| Case 44 | 20 | 48,930,366 | 49,409,653 | 3 | 2 | 5 | 0 |
| Case 44 | 20 | 49,410,892 | 50,426,860 | 3 | 1 | 4 | 0 |
| Case 44 | 20 | 50,437,573 | 51,509,864 | 3 | 2 | 5 | 0 |
| Case 44 | 20 | 51,514,621 | 51,522,918 | 3 | 0 | 3 | 1 |
| Case 44 | 20 | 51,527,356 | 51,870,106 | 4 | 0 | 4 | 1 |
| Case 44 | 20 | 51,870,151 | 51,917,248 | 3 | 0 | 3 | 1 |
| Case 44 | 20 | 51,918,171 | 54,777,973 | 4 | 0 | 4 | 1 |
| Case 44 | 20 | 54,780,376 | 55,420,654 | 3 | 0 | 3 | 1 |
| Case 44 | 20 | 55,421,778 | 55,991,695 | 4 | 0 | 4 | 1 |
| Case 44 | 20 | 55,991,823 | 56,782,876 | 3 | 1 | 4 | 0 |
| Case 44 | 20 | 56,785,906 | 56,994,489 | 3 | 2 | 5 | 0 |
| Case 44 | 20 | 56,994,740 | 58,416,428 | 3 | 1 | 4 | 0 |
| Case 44 | 20 | 58,436,963 | 58,496,439 | 4 | 3 | 7 | 0 |
| Case 44 | 20 | 58,500,453 | 58,500,453 | 3 | 0 | 3 | 1 |
| Case 44 | 20 | 58,502,456 | 61,040,951 | 3 | 1 | 4 | 0 |
| Case 44 | 20 | 61,041,906 | 61,826,524 | 3 | 2 | 5 | 0 |
| Case 44 | 20 | 61,834,169 | 62,193,253 | 3 | 1 | 4 | 0 |
| Case 44 | 20 | 62,193,445 | 62,221,249 | 3 | 2 | 5 | 0 |
| Case 44 | 20 | 62,221,810 | 62,948,788 | 3 | 1 | 4 | 0 |
| Case 44 | 21 | 10,827,533 | 10,971,337 | 2 | 0 | 2 | 1 |
| Case 44 | 21 | 14,368,320 | 18,061,292 | 2 | 0 | 2 | 1 |
| Case 44 | 21 | 18,064,333 | 18,457,828 | 3 | 0 | 3 | 1 |
| Case 44 | 21 | 18,461,843 | 18,900,044 | 2 | 0 | 2 | 1 |
| Case 44 | 21 | 18,901,969 | 18,971,107 | 3 | 0 | 3 | 1 |
| Case 44 | 21 | 18,971,359 | 22,563,193 | 2 | 0 | 2 | 1 |
| Case 44 | 21 | 22,572,304 | 24,944,202 | 2 | 1 | 3 | 0 |
| Case 44 | 21 | 24,951,271 | 25,858,886 | 2 | 0 | 2 | 1 |
| Case 44 | 21 | 25,865,342 | 35,782,033 | 2 | 1 | 3 | 0 |
| Case 44 | 21 | 35,783,219 | 37,618,896 | 2 | 0 | 2 | 1 |
| Case 44 | 21 | 37,619,820 | 37,818,305 | 3 | 0 | 3 | 1 |
| Case 44 | 21 | 37,818,871 | 38,390,419 | 2 | 0 | 2 | 1 |
| Case 44 | 21 | 38,390,425 | 40,157,281 | 2 | 1 | 3 | 0 |
| Case 44 | 21 | 40,169,139 | 40,604,205 | 2 | 0 | 2 | 1 |
| Case 44 | 21 | 40,619,757 | 40,819,685 | 3 | 0 | 3 | 1 |
| Case 44 | 21 | 40,823,836 | 41,842,252 | 2 | 0 | 2 | 1 |
| Case 44 | 21 | 41,844,939 | 41,986,158 | 3 | 0 | 3 | 1 |
| Case 44 | 21 | 41,993,707 | 42,852,320 | 2 | 1 | 3 | 0 |
| Case 44 | 21 | 42,852,497 | 43,060,084 | 3 | 1 | 4 | 0 |
| Case 44 | 21 | 43,060,391 | 43,944,231 | 2 | 1 | 3 | 0 |
| Case 44 | 21 | 43,950,304 | 44,071,939 | 3 | 0 | 3 | 1 |
| Case 44 | 21 | 44,072,193 | 44,574,196 | 2 | 0 | 2 | 1 |
| Case 44 | 21 | 44,574,541 | 44,829,087 | 3 | 0 | 3 | 1 |
| Case 44 | 21 | 44,830,955 | 46,634,966 | 2 | 0 | 2 | 1 |
| Case 44 | 21 | 46,636,844 | 46,687,542 | 3 | 0 | 3 | 1 |
| Case 44 | 21 | 46,687,595 | 47,300,385 | 2 | 0 | 2 | 1 |
| Case 44 | 21 | 47,303,177 | 48,100,155 | 2 | 1 | 3 | 0 |
| Case 44 | 22 | 16,114,244 | 17,194,326 | 3 | 0 | 3 | 1 |

|         |    |            |            |   |   |   |   |
|---------|----|------------|------------|---|---|---|---|
| Case 44 | 22 | 17,195,268 | 17,721,595 | 2 | 0 | 2 | 1 |
| Case 44 | 22 | 17,722,536 | 18,018,516 | 3 | 0 | 3 | 1 |
| Case 44 | 22 | 18,020,330 | 18,073,856 | 2 | 0 | 2 | 1 |
| Case 44 | 22 | 18,076,523 | 18,210,200 | 3 | 0 | 3 | 1 |
| Case 44 | 22 | 18,210,242 | 18,566,288 | 2 | 0 | 2 | 1 |
| Case 44 | 22 | 18,566,328 | 18,886,915 | 3 | 0 | 3 | 1 |
| Case 44 | 22 | 18,889,490 | 25,886,661 | 2 | 0 | 2 | 1 |
| Case 44 | 22 | 25,887,513 | 26,144,760 | 3 | 0 | 3 | 1 |
| Case 44 | 22 | 26,146,429 | 27,855,335 | 2 | 0 | 2 | 1 |
| Case 44 | 22 | 27,861,922 | 27,899,679 | 3 | 0 | 3 | 1 |
| Case 44 | 22 | 27,899,801 | 28,497,820 | 2 | 0 | 2 | 1 |
| Case 44 | 22 | 28,501,344 | 29,081,309 | 3 | 0 | 3 | 1 |
| Case 44 | 22 | 29,087,041 | 30,418,123 | 2 | 0 | 2 | 1 |
| Case 44 | 22 | 30,421,786 | 30,606,986 | 3 | 0 | 3 | 1 |
| Case 44 | 22 | 30,610,546 | 31,843,478 | 2 | 0 | 2 | 1 |
| Case 44 | 22 | 31,845,460 | 31,942,770 | 3 | 0 | 3 | 1 |
| Case 44 | 22 | 31,942,872 | 36,109,415 | 2 | 0 | 2 | 1 |
| Case 44 | 22 | 36,112,879 | 36,537,327 | 3 | 0 | 3 | 1 |
| Case 44 | 22 | 36,537,432 | 36,894,069 | 2 | 0 | 2 | 1 |
| Case 44 | 22 | 36,894,133 | 37,289,869 | 3 | 0 | 3 | 1 |
| Case 44 | 22 | 37,293,567 | 38,864,287 | 2 | 0 | 2 | 1 |
| Case 44 | 22 | 38,864,460 | 39,077,991 | 3 | 0 | 3 | 1 |
| Case 44 | 22 | 39,078,021 | 40,195,017 | 2 | 0 | 2 | 1 |
| Case 44 | 22 | 40,197,683 | 40,333,129 | 3 | 0 | 3 | 1 |
| Case 44 | 22 | 40,334,927 | 41,075,733 | 2 | 0 | 2 | 1 |
| Case 44 | 22 | 41,076,970 | 41,471,003 | 3 | 0 | 3 | 1 |
| Case 44 | 22 | 41,487,218 | 42,514,190 | 2 | 0 | 2 | 1 |
| Case 44 | 22 | 42,515,914 | 42,661,144 | 3 | 0 | 3 | 1 |
| Case 44 | 22 | 42,665,117 | 44,031,042 | 2 | 0 | 2 | 1 |
| Case 44 | 22 | 44,031,070 | 44,156,436 | 3 | 0 | 3 | 1 |
| Case 44 | 22 | 44,159,605 | 45,459,791 | 2 | 0 | 2 | 1 |
| Case 44 | 22 | 45,461,782 | 45,595,721 | 3 | 0 | 3 | 1 |
| Case 44 | 22 | 45,596,249 | 45,691,554 | 2 | 0 | 2 | 1 |
| Case 44 | 22 | 45,693,828 | 45,815,332 | 3 | 0 | 3 | 1 |
| Case 44 | 22 | 45,816,269 | 45,865,055 | 2 | 0 | 2 | 1 |
| Case 44 | 22 | 45,878,130 | 46,237,002 | 3 | 0 | 3 | 1 |
| Case 44 | 22 | 46,238,069 | 47,000,246 | 2 | 0 | 2 | 1 |
| Case 44 | 22 | 47,005,740 | 47,365,333 | 3 | 0 | 3 | 1 |
| Case 44 | 22 | 47,367,112 | 49,847,719 | 2 | 0 | 2 | 1 |
| Case 44 | 22 | 49,849,024 | 50,278,031 | 3 | 0 | 3 | 1 |
| Case 44 | 22 | 50,278,325 | 50,472,042 | 2 | 0 | 2 | 1 |
| Case 44 | 22 | 50,474,943 | 50,599,466 | 3 | 0 | 3 | 1 |
| Case 44 | 22 | 50,599,472 | 50,724,504 | 2 | 0 | 2 | 1 |
| Case 44 | 22 | 50,724,648 | 50,868,013 | 3 | 0 | 3 | 1 |
| Case 44 | 22 | 50,868,925 | 51,195,728 | 2 | 0 | 2 | 1 |
| Case 45 | 1  | 82,154     | 3,754,043  | 2 | 0 | 2 | 1 |
| Case 45 | 1  | 3,754,596  | 6,157,383  | 2 | 1 | 3 | 0 |
| Case 45 | 1  | 6,158,562  | 6,638,995  | 2 | 0 | 2 | 1 |
| Case 45 | 1  | 6,639,073  | 15,772,212 | 2 | 1 | 3 | 0 |
| Case 45 | 1  | 15,772,933 | 17,297,252 | 2 | 0 | 2 | 1 |
| Case 45 | 1  | 17,297,583 | 17,548,940 | 2 | 1 | 3 | 0 |
| Case 45 | 1  | 17,548,945 | 17,649,796 | 2 | 0 | 2 | 1 |
| Case 45 | 1  | 17,655,407 | 20,986,078 | 2 | 1 | 3 | 0 |
| Case 45 | 1  | 20,986,557 | 22,477,493 | 2 | 0 | 2 | 1 |
| Case 45 | 1  | 22,479,193 | 26,648,530 | 2 | 1 | 3 | 0 |
| Case 45 | 1  | 26,648,684 | 29,609,232 | 2 | 0 | 2 | 1 |
| Case 45 | 1  | 29,609,327 | 35,379,119 | 2 | 1 | 3 | 0 |
| Case 45 | 1  | 35,379,493 | 35,881,138 | 2 | 0 | 2 | 1 |
| Case 45 | 1  | 35,882,659 | 62,896,419 | 2 | 1 | 3 | 0 |
| Case 45 | 1  | 62,898,142 | 63,336,271 | 2 | 0 | 2 | 1 |
| Case 45 | 1  | 63,346,976 | 69,612,469 | 2 | 1 | 3 | 0 |

|         |   |             |             |   |   |   |   |
|---------|---|-------------|-------------|---|---|---|---|
| Case 45 | 1 | 69,619,701  | 70,207,079  | 2 | 0 | 2 | 1 |
| Case 45 | 1 | 70,207,668  | 72,104,447  | 2 | 1 | 3 | 0 |
| Case 45 | 1 | 72,108,798  | 74,716,413  | 2 | 0 | 2 | 1 |
| Case 45 | 1 | 74,716,443  | 77,895,705  | 2 | 1 | 3 | 0 |
| Case 45 | 1 | 77,896,080  | 78,558,419  | 2 | 0 | 2 | 1 |
| Case 45 | 1 | 78,562,989  | 79,380,466  | 2 | 1 | 3 | 0 |
| Case 45 | 1 | 79,382,009  | 81,207,701  | 2 | 0 | 2 | 1 |
| Case 45 | 1 | 81,208,897  | 86,175,554  | 2 | 1 | 3 | 0 |
| Case 45 | 1 | 86,195,047  | 86,564,339  | 2 | 0 | 2 | 1 |
| Case 45 | 1 | 86,565,367  | 92,442,695  | 2 | 1 | 3 | 0 |
| Case 45 | 1 | 92,442,802  | 94,400,045  | 2 | 0 | 2 | 1 |
| Case 45 | 1 | 94,417,219  | 97,685,992  | 2 | 1 | 3 | 0 |
| Case 45 | 1 | 97,686,036  | 98,579,211  | 2 | 0 | 2 | 1 |
| Case 45 | 1 | 98,580,341  | 98,812,484  | 2 | 1 | 3 | 0 |
| Case 45 | 1 | 98,814,626  | 99,911,058  | 2 | 0 | 2 | 1 |
| Case 45 | 1 | 99,913,450  | 100,154,778 | 2 | 1 | 3 | 0 |
| Case 45 | 1 | 100,155,012 | 100,624,886 | 2 | 0 | 2 | 1 |
| Case 45 | 1 | 100,624,961 | 102,349,186 | 2 | 1 | 3 | 0 |
| Case 45 | 1 | 102,350,747 | 105,429,577 | 2 | 0 | 2 | 1 |
| Case 45 | 1 | 105,439,368 | 111,202,768 | 2 | 1 | 3 | 0 |
| Case 45 | 1 | 111,204,185 | 111,671,707 | 2 | 0 | 2 | 1 |
| Case 45 | 1 | 111,682,118 | 121,346,616 | 2 | 1 | 3 | 0 |
| Case 45 | 1 | 142,649,718 | 145,576,091 | 2 | 1 | 3 | 0 |
| Case 45 | 1 | 145,578,279 | 147,726,495 | 3 | 1 | 4 | 0 |
| Case 45 | 1 | 147,729,232 | 147,763,232 | 1 | 1 | 2 | 0 |
| Case 45 | 1 | 147,766,567 | 161,479,745 | 2 | 1 | 3 | 0 |
| Case 45 | 1 | 161,492,587 | 164,835,340 | 3 | 1 | 4 | 0 |
| Case 45 | 1 | 164,835,685 | 164,862,578 | 1 | 1 | 2 | 0 |
| Case 45 | 1 | 164,864,196 | 168,341,479 | 2 | 1 | 3 | 0 |
| Case 45 | 1 | 168,341,835 | 169,576,207 | 3 | 1 | 4 | 0 |
| Case 45 | 1 | 169,576,333 | 177,710,595 | 2 | 1 | 3 | 0 |
| Case 45 | 1 | 177,710,610 | 180,535,972 | 3 | 1 | 4 | 0 |
| Case 45 | 1 | 180,536,954 | 180,536,954 | 1 | 1 | 2 | 0 |
| Case 45 | 1 | 180,540,896 | 180,540,896 | 2 | 1 | 3 | 0 |
| Case 45 | 1 | 180,541,363 | 180,541,363 | 1 | 1 | 2 | 0 |
| Case 45 | 1 | 180,546,296 | 240,776,222 | 2 | 1 | 3 | 0 |
| Case 45 | 1 | 240,778,731 | 240,783,716 | 2 | 0 | 2 | 1 |
| Case 45 | 1 | 240,786,782 | 241,183,893 | 1 | 0 | 1 | 0 |
| Case 45 | 1 | 241,185,048 | 249,218,992 | 2 | 1 | 3 | 0 |
| Case 45 | 2 | 18,674      | 40,070,224  | 2 | 1 | 3 | 0 |
| Case 45 | 2 | 40,072,561  | 43,371,542  | 3 | 1 | 4 | 0 |
| Case 45 | 2 | 43,386,134  | 44,531,412  | 2 | 1 | 3 | 0 |
| Case 45 | 2 | 44,532,326  | 46,211,658  | 3 | 1 | 4 | 0 |
| Case 45 | 2 | 46,217,331  | 65,000,458  | 2 | 1 | 3 | 0 |
| Case 45 | 2 | 65,004,346  | 77,351,450  | 3 | 0 | 3 | 1 |
| Case 45 | 2 | 77,360,561  | 79,101,215  | 2 | 0 | 2 | 1 |
| Case 45 | 2 | 79,104,576  | 79,478,988  | 2 | 1 | 3 | 0 |
| Case 45 | 2 | 79,481,038  | 92,081,640  | 3 | 0 | 3 | 1 |
| Case 45 | 2 | 95,429,424  | 131,484,635 | 3 | 0 | 3 | 1 |
| Case 45 | 2 | 131,486,169 | 133,074,638 | 2 | 0 | 2 | 1 |
| Case 45 | 2 | 133,086,909 | 140,580,413 | 3 | 0 | 3 | 1 |
| Case 45 | 2 | 140,580,795 | 141,336,597 | 2 | 0 | 2 | 1 |
| Case 45 | 2 | 141,338,918 | 152,271,907 | 3 | 0 | 3 | 1 |
| Case 45 | 2 | 152,273,140 | 152,369,315 | 1 | 1 | 2 | 0 |
| Case 45 | 2 | 152,369,326 | 207,335,853 | 3 | 0 | 3 | 1 |
| Case 45 | 2 | 207,337,780 | 207,686,299 | 1 | 1 | 2 | 0 |
| Case 45 | 2 | 207,689,161 | 238,641,521 | 3 | 0 | 3 | 1 |
| Case 45 | 2 | 238,642,460 | 239,170,438 | 2 | 0 | 2 | 1 |
| Case 45 | 2 | 239,172,863 | 240,954,110 | 3 | 0 | 3 | 1 |
| Case 45 | 2 | 240,954,203 | 243,048,760 | 2 | 0 | 2 | 1 |
| Case 45 | 3 | 61,495      | 1,154,559   | 1 | 1 | 2 | 0 |

|         |   |             |             |   |   |   |   |
|---------|---|-------------|-------------|---|---|---|---|
| Case 45 | 3 | 1,155,102   | 1,289,346   | 3 | 0 | 3 | 1 |
| Case 45 | 3 | 1,289,452   | 9,867,625   | 2 | 1 | 3 | 0 |
| Case 45 | 3 | 9,867,629   | 10,103,878  | 2 | 0 | 2 | 1 |
| Case 45 | 3 | 10,105,568  | 20,552,462  | 2 | 1 | 3 | 0 |
| Case 45 | 3 | 20,554,738  | 23,097,075  | 3 | 0 | 3 | 1 |
| Case 45 | 3 | 23,107,083  | 23,784,303  | 1 | 1 | 2 | 0 |
| Case 45 | 3 | 23,785,060  | 25,648,736  | 2 | 1 | 3 | 0 |
| Case 45 | 3 | 25,648,865  | 30,032,530  | 1 | 1 | 2 | 0 |
| Case 45 | 3 | 30,032,626  | 32,358,003  | 2 | 1 | 3 | 0 |
| Case 45 | 3 | 32,358,666  | 32,799,706  | 1 | 1 | 2 | 0 |
| Case 45 | 3 | 32,800,957  | 33,468,329  | 2 | 1 | 3 | 0 |
| Case 45 | 3 | 33,483,744  | 38,047,680  | 1 | 1 | 2 | 0 |
| Case 45 | 3 | 38,047,954  | 38,354,498  | 2 | 1 | 3 | 0 |
| Case 45 | 3 | 38,355,244  | 38,781,116  | 1 | 1 | 2 | 0 |
| Case 45 | 3 | 38,782,026  | 41,609,986  | 2 | 1 | 3 | 0 |
| Case 45 | 3 | 41,611,228  | 42,484,782  | 1 | 1 | 2 | 0 |
| Case 45 | 3 | 42,484,827  | 57,723,143  | 1 | 0 | 1 | 0 |
| Case 45 | 3 | 57,724,602  | 59,796,869  | 2 | 1 | 3 | 0 |
| Case 45 | 3 | 59,802,813  | 59,926,256  | 2 | 0 | 2 | 1 |
| Case 45 | 3 | 59,927,727  | 60,065,257  | 0 | 0 | 0 | 0 |
| Case 45 | 3 | 60,066,360  | 60,434,122  | 2 | 0 | 2 | 1 |
| Case 45 | 3 | 60,434,444  | 60,571,772  | 1 | 0 | 1 | 0 |
| Case 45 | 3 | 60,572,073  | 60,880,607  | 1 | 1 | 2 | 0 |
| Case 45 | 3 | 60,888,974  | 67,527,259  | 2 | 1 | 3 | 0 |
| Case 45 | 3 | 67,531,388  | 70,438,588  | 1 | 1 | 2 | 0 |
| Case 45 | 3 | 70,442,904  | 72,400,695  | 2 | 1 | 3 | 0 |
| Case 45 | 3 | 72,403,467  | 73,131,351  | 1 | 1 | 2 | 0 |
| Case 45 | 3 | 73,137,972  | 74,080,776  | 2 | 1 | 3 | 0 |
| Case 45 | 3 | 74,081,555  | 80,261,661  | 1 | 1 | 2 | 0 |
| Case 45 | 3 | 80,264,806  | 82,127,705  | 2 | 1 | 3 | 0 |
| Case 45 | 3 | 82,145,477  | 89,270,605  | 1 | 1 | 2 | 0 |
| Case 45 | 3 | 89,270,738  | 90,442,925  | 2 | 1 | 3 | 0 |
| Case 45 | 3 | 93,537,290  | 155,241,740 | 2 | 1 | 3 | 0 |
| Case 45 | 3 | 155,241,900 | 160,562,018 | 2 | 0 | 2 | 1 |
| Case 45 | 3 | 160,570,195 | 175,094,357 | 2 | 1 | 3 | 0 |
| Case 45 | 3 | 175,096,546 | 175,329,367 | 1 | 1 | 2 | 0 |
| Case 45 | 3 | 175,334,302 | 197,838,262 | 2 | 1 | 3 | 0 |
| Case 45 | 4 | 71,566      | 86,089      | 1 | 1 | 2 | 0 |
| Case 45 | 4 | 86,137      | 502,911     | 1 | 0 | 1 | 0 |
| Case 45 | 4 | 504,012     | 949,214     | 1 | 1 | 2 | 0 |
| Case 45 | 4 | 949,223     | 985,310     | 1 | 0 | 1 | 0 |
| Case 45 | 4 | 985,418     | 1,389,557   | 1 | 1 | 2 | 0 |
| Case 45 | 4 | 1,389,588   | 2,329,295   | 1 | 0 | 1 | 0 |
| Case 45 | 4 | 2,332,705   | 49,620,898  | 1 | 1 | 2 | 0 |
| Case 45 | 4 | 52,697,856  | 52,938,243  | 1 | 1 | 2 | 0 |
| Case 45 | 4 | 52,938,265  | 60,129,838  | 2 | 1 | 3 | 0 |
| Case 45 | 4 | 60,143,686  | 61,836,190  | 2 | 0 | 2 | 1 |
| Case 45 | 4 | 61,837,133  | 63,458,896  | 2 | 1 | 3 | 0 |
| Case 45 | 4 | 63,467,034  | 66,079,826  | 2 | 0 | 2 | 1 |
| Case 45 | 4 | 66,083,947  | 68,472,604  | 2 | 1 | 3 | 0 |
| Case 45 | 4 | 68,480,525  | 71,362,025  | 2 | 0 | 2 | 1 |
| Case 45 | 4 | 71,362,151  | 85,566,809  | 2 | 1 | 3 | 0 |
| Case 45 | 4 | 85,569,724  | 85,859,997  | 1 | 1 | 2 | 0 |
| Case 45 | 4 | 85,872,414  | 86,000,455  | 2 | 0 | 2 | 1 |
| Case 45 | 4 | 86,005,206  | 91,164,874  | 2 | 1 | 3 | 0 |
| Case 45 | 4 | 91,165,346  | 93,873,811  | 2 | 0 | 2 | 1 |
| Case 45 | 4 | 93,875,521  | 94,799,694  | 2 | 1 | 3 | 0 |
| Case 45 | 4 | 94,802,707  | 95,545,821  | 1 | 1 | 2 | 0 |
| Case 45 | 4 | 95,555,833  | 106,887,163 | 2 | 1 | 3 | 0 |
| Case 45 | 4 | 106,888,263 | 107,318,580 | 1 | 1 | 2 | 0 |
| Case 45 | 4 | 107,329,974 | 113,454,932 | 2 | 1 | 3 | 0 |

|         |   |             |             |   |   |   |   |
|---------|---|-------------|-------------|---|---|---|---|
| Case 45 | 4 | 113,459,405 | 114,078,812 | 1 | 1 | 2 | 0 |
| Case 45 | 4 | 114,078,931 | 115,681,827 | 2 | 1 | 3 | 0 |
| Case 45 | 4 | 115,688,354 | 117,298,571 | 2 | 0 | 2 | 1 |
| Case 45 | 4 | 117,300,599 | 118,003,302 | 2 | 1 | 3 | 0 |
| Case 45 | 4 | 118,005,474 | 118,722,199 | 2 | 0 | 2 | 1 |
| Case 45 | 4 | 118,722,751 | 122,734,423 | 2 | 1 | 3 | 0 |
| Case 45 | 4 | 122,734,475 | 123,663,259 | 2 | 0 | 2 | 1 |
| Case 45 | 4 | 123,663,391 | 127,030,561 | 2 | 1 | 3 | 0 |
| Case 45 | 4 | 127,037,075 | 129,218,126 | 2 | 0 | 2 | 1 |
| Case 45 | 4 | 129,221,901 | 131,101,141 | 2 | 1 | 3 | 0 |
| Case 45 | 4 | 131,103,736 | 132,242,896 | 1 | 1 | 2 | 0 |
| Case 45 | 4 | 132,252,355 | 133,289,007 | 2 | 0 | 2 | 1 |
| Case 45 | 4 | 133,331,707 | 133,504,375 | 0 | 0 | 0 | 0 |
| Case 45 | 4 | 133,508,013 | 134,154,732 | 2 | 1 | 3 | 0 |
| Case 45 | 4 | 134,164,619 | 138,168,682 | 2 | 0 | 2 | 1 |
| Case 45 | 4 | 138,171,595 | 145,226,422 | 2 | 1 | 3 | 0 |
| Case 45 | 4 | 145,227,600 | 184,441,917 | 2 | 0 | 2 | 1 |
| Case 45 | 4 | 184,447,081 | 185,009,856 | 1 | 0 | 1 | 0 |
| Case 45 | 4 | 185,012,398 | 185,023,528 | 1 | 1 | 2 | 0 |
| Case 45 | 4 | 185,023,826 | 189,189,273 | 2 | 0 | 2 | 1 |
| Case 45 | 4 | 189,194,661 | 189,584,353 | 1 | 0 | 1 | 0 |
| Case 45 | 4 | 189,584,904 | 190,963,766 | 2 | 0 | 2 | 1 |
| Case 45 | 5 | 38,139      | 19,158,050  | 2 | 0 | 2 | 1 |
| Case 45 | 5 | 19,160,015  | 19,678,764  | 2 | 1 | 3 | 0 |
| Case 45 | 5 | 19,679,108  | 31,340,231  | 2 | 0 | 2 | 1 |
| Case 45 | 5 | 31,343,671  | 31,900,372  | 2 | 1 | 3 | 0 |
| Case 45 | 5 | 31,900,521  | 32,790,535  | 2 | 0 | 2 | 1 |
| Case 45 | 5 | 32,790,835  | 35,965,745  | 2 | 1 | 3 | 0 |
| Case 45 | 5 | 35,965,970  | 37,515,348  | 2 | 0 | 2 | 1 |
| Case 45 | 5 | 37,531,747  | 38,778,514  | 2 | 1 | 3 | 0 |
| Case 45 | 5 | 38,780,436  | 40,411,291  | 2 | 0 | 2 | 1 |
| Case 45 | 5 | 40,414,436  | 42,719,092  | 2 | 1 | 3 | 0 |
| Case 45 | 5 | 42,719,239  | 43,394,778  | 2 | 0 | 2 | 1 |
| Case 45 | 5 | 43,401,980  | 45,840,303  | 2 | 1 | 3 | 0 |
| Case 45 | 5 | 45,841,630  | 46,399,093  | 2 | 0 | 2 | 1 |
| Case 45 | 5 | 49,457,282  | 61,437,645  | 2 | 0 | 2 | 1 |
| Case 45 | 5 | 61,438,771  | 61,867,920  | 1 | 0 | 1 | 0 |
| Case 45 | 5 | 61,876,773  | 84,248,966  | 2 | 0 | 2 | 1 |
| Case 45 | 5 | 84,263,712  | 87,498,849  | 1 | 0 | 1 | 0 |
| Case 45 | 5 | 87,502,292  | 89,640,426  | 2 | 0 | 2 | 1 |
| Case 45 | 5 | 89,642,239  | 90,172,331  | 1 | 0 | 1 | 0 |
| Case 45 | 5 | 90,180,120  | 99,146,425  | 2 | 0 | 2 | 1 |
| Case 45 | 5 | 99,146,588  | 102,936,432 | 1 | 0 | 1 | 0 |
| Case 45 | 5 | 102,937,084 | 103,450,242 | 2 | 0 | 2 | 1 |
| Case 45 | 5 | 103,450,790 | 105,804,683 | 1 | 0 | 1 | 0 |
| Case 45 | 5 | 105,805,717 | 108,041,607 | 2 | 0 | 2 | 1 |
| Case 45 | 5 | 108,045,837 | 110,481,203 | 1 | 0 | 1 | 0 |
| Case 45 | 5 | 110,482,490 | 112,848,767 | 2 | 0 | 2 | 1 |
| Case 45 | 5 | 112,849,608 | 112,989,901 | 1 | 0 | 1 | 0 |
| Case 45 | 5 | 112,990,207 | 116,264,097 | 2 | 0 | 2 | 1 |
| Case 45 | 5 | 116,265,087 | 117,005,977 | 1 | 0 | 1 | 0 |
| Case 45 | 5 | 117,006,071 | 118,180,935 | 2 | 0 | 2 | 1 |
| Case 45 | 5 | 118,183,823 | 118,582,779 | 1 | 0 | 1 | 0 |
| Case 45 | 5 | 118,583,487 | 119,413,813 | 2 | 0 | 2 | 1 |
| Case 45 | 5 | 119,434,193 | 120,020,074 | 1 | 0 | 1 | 0 |
| Case 45 | 5 | 120,021,817 | 139,931,384 | 2 | 0 | 2 | 1 |
| Case 45 | 5 | 139,931,607 | 139,931,655 | 0 | 0 | 0 | 0 |
| Case 45 | 5 | 139,931,656 | 168,182,992 | 2 | 0 | 2 | 1 |
| Case 45 | 5 | 168,183,736 | 168,653,502 | 3 | 0 | 3 | 1 |
| Case 45 | 5 | 168,653,516 | 180,693,127 | 2 | 0 | 2 | 1 |
| Case 45 | 6 | 108,666     | 1,558,640   | 3 | 0 | 3 | 1 |



|         |   |             |             |   |   |   |   |
|---------|---|-------------|-------------|---|---|---|---|
| Case 45 | 6 | 1,560,002   | 1,641,007   | 2 | 0 | 2 | 1 |
| Case 45 | 6 | 1,647,508   | 2,048,584   | 1 | 0 | 1 | 0 |
| Case 45 | 6 | 2,052,811   | 2,059,110   | 1 | 1 | 2 | 0 |
| Case 45 | 6 | 2,062,447   | 3,942,134   | 3 | 0 | 3 | 1 |
| Case 45 | 6 | 3,944,424   | 5,100,903   | 2 | 0 | 2 | 1 |
| Case 45 | 6 | 5,101,520   | 6,854,396   | 3 | 0 | 3 | 1 |
| Case 45 | 6 | 6,855,722   | 10,982,652  | 2 | 0 | 2 | 1 |
| Case 45 | 6 | 10,982,848  | 17,547,788  | 3 | 0 | 3 | 1 |
| Case 45 | 6 | 17,550,158  | 19,945,505  | 2 | 0 | 2 | 1 |
| Case 45 | 6 | 19,946,730  | 22,207,494  | 3 | 0 | 3 | 1 |
| Case 45 | 6 | 22,207,573  | 25,292,401  | 2 | 0 | 2 | 1 |
| Case 45 | 6 | 25,296,606  | 25,740,502  | 3 | 0 | 3 | 1 |
| Case 45 | 6 | 25,745,742  | 29,940,750  | 2 | 0 | 2 | 1 |
| Case 45 | 6 | 29,941,943  | 30,140,540  | 3 | 0 | 3 | 1 |
| Case 45 | 6 | 30,140,913  | 32,609,150  | 2 | 0 | 2 | 1 |
| Case 45 | 6 | 32,609,323  | 32,828,694  | 3 | 0 | 3 | 1 |
| Case 45 | 6 | 32,829,276  | 33,026,110  | 2 | 0 | 2 | 1 |
| Case 45 | 6 | 33,026,246  | 33,061,871  | 3 | 0 | 3 | 1 |
| Case 45 | 6 | 33,061,930  | 36,939,213  | 2 | 0 | 2 | 1 |
| Case 45 | 6 | 36,942,746  | 38,318,721  | 3 | 0 | 3 | 1 |
| Case 45 | 6 | 38,320,943  | 38,505,602  | 2 | 0 | 2 | 1 |
| Case 45 | 6 | 38,508,509  | 42,486,688  | 4 | 0 | 4 | 1 |
| Case 45 | 6 | 42,495,278  | 58,333,290  | 3 | 0 | 3 | 1 |
| Case 45 | 6 | 58,344,955  | 58,752,089  | 2 | 0 | 2 | 1 |
| Case 45 | 6 | 61,891,118  | 90,629,110  | 2 | 0 | 2 | 1 |
| Case 45 | 6 | 90,631,132  | 92,208,995  | 2 | 1 | 3 | 0 |
| Case 45 | 6 | 92,210,391  | 105,991,031 | 2 | 0 | 2 | 1 |
| Case 45 | 6 | 105,991,917 | 106,613,091 | 2 | 1 | 3 | 0 |
| Case 45 | 6 | 106,616,379 | 107,870,546 | 2 | 0 | 2 | 1 |
| Case 45 | 6 | 107,878,826 | 108,131,849 | 2 | 1 | 3 | 0 |
| Case 45 | 6 | 108,139,570 | 111,955,435 | 2 | 0 | 2 | 1 |
| Case 45 | 6 | 111,964,747 | 112,370,218 | 2 | 1 | 3 | 0 |
| Case 45 | 6 | 112,374,944 | 123,955,967 | 2 | 0 | 2 | 1 |
| Case 45 | 6 | 123,958,493 | 124,890,704 | 1 | 1 | 2 | 0 |
| Case 45 | 6 | 124,894,966 | 138,723,962 | 2 | 0 | 2 | 1 |
| Case 45 | 6 | 138,726,183 | 139,110,345 | 2 | 1 | 3 | 0 |
| Case 45 | 6 | 139,113,926 | 151,152,250 | 2 | 0 | 2 | 1 |
| Case 45 | 6 | 151,152,257 | 151,773,504 | 2 | 1 | 3 | 0 |
| Case 45 | 6 | 151,774,339 | 152,576,731 | 2 | 0 | 2 | 1 |
| Case 45 | 6 | 152,576,758 | 154,221,214 | 1 | 1 | 2 | 0 |
| Case 45 | 6 | 154,237,443 | 166,030,770 | 2 | 0 | 2 | 1 |
| Case 45 | 6 | 166,031,534 | 166,455,916 | 2 | 1 | 3 | 0 |
| Case 45 | 6 | 166,465,095 | 167,492,552 | 2 | 0 | 2 | 1 |
| Case 45 | 6 | 167,500,562 | 170,235,482 | 1 | 1 | 2 | 0 |
| Case 45 | 6 | 170,239,266 | 170,980,171 | 2 | 0 | 2 | 1 |
| Case 45 | 7 | 44,935      | 2,969,680   | 1 | 1 | 2 | 0 |
| Case 45 | 7 | 2,969,689   | 3,434,275   | 2 | 1 | 3 | 0 |
| Case 45 | 7 | 3,445,311   | 3,459,998   | 5 | 0 | 5 | 1 |
| Case 45 | 7 | 3,472,629   | 3,618,143   | 1 | 1 | 2 | 0 |
| Case 45 | 7 | 3,624,238   | 4,213,975   | 2 | 1 | 3 | 0 |
| Case 45 | 7 | 4,214,725   | 5,721,448   | 1 | 1 | 2 | 0 |
| Case 45 | 7 | 5,726,022   | 6,485,586   | 2 | 1 | 3 | 0 |
| Case 45 | 7 | 6,485,619   | 7,252,775   | 1 | 1 | 2 | 0 |
| Case 45 | 7 | 7,254,279   | 9,006,896   | 2 | 1 | 3 | 0 |
| Case 45 | 7 | 9,009,137   | 9,197,737   | 1 | 1 | 2 | 0 |
| Case 45 | 7 | 9,199,121   | 10,220,549  | 2 | 1 | 3 | 0 |
| Case 45 | 7 | 10,222,003  | 11,277,857  | 1 | 1 | 2 | 0 |
| Case 45 | 7 | 11,279,164  | 11,860,937  | 2 | 1 | 3 | 0 |
| Case 45 | 7 | 11,871,406  | 12,406,826  | 1 | 1 | 2 | 0 |
| Case 45 | 7 | 12,406,989  | 13,395,594  | 2 | 1 | 3 | 0 |
| Case 45 | 7 | 13,415,675  | 14,703,526  | 1 | 1 | 2 | 0 |

|         |   |             |             |   |   |   |   |
|---------|---|-------------|-------------|---|---|---|---|
| Case 45 | 7 | 14,703,893  | 55,388,586  | 2 | 1 | 3 | 0 |
| Case 45 | 7 | 55,390,990  | 58,019,061  | 1 | 1 | 2 | 0 |
| Case 45 | 7 | 61,056,053  | 65,202,326  | 1 | 1 | 2 | 0 |
| Case 45 | 7 | 65,203,587  | 70,249,868  | 2 | 1 | 3 | 0 |
| Case 45 | 7 | 70,251,651  | 75,437,107  | 1 | 1 | 2 | 0 |
| Case 45 | 7 | 75,437,685  | 75,667,569  | 2 | 0 | 2 | 1 |
| Case 45 | 7 | 75,685,593  | 78,630,180  | 2 | 1 | 3 | 0 |
| Case 45 | 7 | 78,632,489  | 80,303,762  | 1 | 1 | 2 | 0 |
| Case 45 | 7 | 80,304,072  | 81,070,971  | 2 | 1 | 3 | 0 |
| Case 45 | 7 | 81,071,123  | 81,926,808  | 1 | 1 | 2 | 0 |
| Case 45 | 7 | 81,942,310  | 83,424,108  | 2 | 1 | 3 | 0 |
| Case 45 | 7 | 83,426,836  | 86,554,937  | 1 | 1 | 2 | 0 |
| Case 45 | 7 | 86,554,948  | 87,259,385  | 2 | 1 | 3 | 0 |
| Case 45 | 7 | 87,260,146  | 89,387,626  | 3 | 0 | 3 | 1 |
| Case 45 | 7 | 89,392,021  | 90,726,315  | 2 | 1 | 3 | 0 |
| Case 45 | 7 | 90,739,777  | 91,851,333  | 1 | 1 | 2 | 0 |
| Case 45 | 7 | 91,855,043  | 93,883,599  | 3 | 0 | 3 | 1 |
| Case 45 | 7 | 93,889,721  | 97,734,248  | 2 | 1 | 3 | 0 |
| Case 45 | 7 | 97,739,317  | 100,211,556 | 5 | 0 | 5 | 1 |
| Case 45 | 7 | 100,212,254 | 149,486,256 | 1 | 1 | 2 | 0 |
| Case 45 | 7 | 149,486,333 | 149,529,970 | 1 | 0 | 1 | 0 |
| Case 45 | 7 | 149,530,894 | 159,119,486 | 1 | 1 | 2 | 0 |
| Case 45 | 8 | 164,984     | 642,842     | 1 | 1 | 2 | 0 |
| Case 45 | 8 | 644,824     | 43,066,939  | 2 | 1 | 3 | 0 |
| Case 45 | 8 | 43,086,928  | 43,791,691  | 1 | 1 | 2 | 0 |
| Case 45 | 8 | 46,886,735  | 49,252,862  | 1 | 1 | 2 | 0 |
| Case 45 | 8 | 49,253,060  | 75,483,809  | 2 | 1 | 3 | 0 |
| Case 45 | 8 | 75,485,868  | 84,671,732  | 3 | 1 | 4 | 0 |
| Case 45 | 8 | 84,680,146  | 91,267,588  | 1 | 1 | 2 | 0 |
| Case 45 | 8 | 91,283,363  | 92,402,207  | 2 | 1 | 3 | 0 |
| Case 45 | 8 | 92,406,021  | 94,828,642  | 1 | 1 | 2 | 0 |
| Case 45 | 8 | 94,830,459  | 97,488,249  | 2 | 1 | 3 | 0 |
| Case 45 | 8 | 97,489,329  | 100,861,110 | 1 | 1 | 2 | 0 |
| Case 45 | 8 | 100,861,113 | 126,441,311 | 2 | 1 | 3 | 0 |
| Case 45 | 8 | 126,443,478 | 126,444,788 | 2 | 2 | 4 | 0 |
| Case 45 | 8 | 126,445,537 | 126,447,308 | 2 | 0 | 2 | 1 |
| Case 45 | 8 | 126,448,393 | 129,047,325 | 2 | 2 | 4 | 0 |
| Case 45 | 8 | 129,050,119 | 129,050,794 | 3 | 0 | 3 | 1 |
| Case 45 | 8 | 129,057,112 | 144,449,192 | 2 | 1 | 3 | 0 |
| Case 45 | 8 | 144,457,793 | 146,293,414 | 1 | 1 | 2 | 0 |
| Case 45 | 9 | 46,587      | 9,459,099   | 1 | 1 | 2 | 0 |
| Case 45 | 9 | 9,461,717   | 9,912,827   | 1 | 0 | 1 | 0 |
| Case 45 | 9 | 9,913,373   | 10,479,902  | 1 | 1 | 2 | 0 |
| Case 45 | 9 | 10,480,030  | 11,609,469  | 1 | 0 | 1 | 0 |
| Case 45 | 9 | 11,609,873  | 17,117,875  | 1 | 1 | 2 | 0 |
| Case 45 | 9 | 17,118,007  | 17,618,048  | 1 | 0 | 1 | 0 |
| Case 45 | 9 | 17,621,918  | 21,811,027  | 1 | 1 | 2 | 0 |
| Case 45 | 9 | 21,812,720  | 23,354,494  | 1 | 0 | 1 | 0 |
| Case 45 | 9 | 23,358,448  | 24,502,737  | 1 | 1 | 2 | 0 |
| Case 45 | 9 | 24,505,123  | 25,535,835  | 1 | 0 | 1 | 0 |
| Case 45 | 9 | 25,535,924  | 26,884,877  | 1 | 1 | 2 | 0 |
| Case 45 | 9 | 26,886,137  | 27,074,233  | 1 | 0 | 1 | 0 |
| Case 45 | 9 | 27,081,879  | 29,291,279  | 1 | 1 | 2 | 0 |
| Case 45 | 9 | 29,296,753  | 31,021,219  | 1 | 0 | 1 | 0 |
| Case 45 | 9 | 31,021,567  | 46,944,322  | 1 | 1 | 2 | 0 |
| Case 45 | 9 | 65,629,772  | 76,189,863  | 1 | 1 | 2 | 0 |
| Case 45 | 9 | 76,191,829  | 76,334,135  | 1 | 0 | 1 | 0 |
| Case 45 | 9 | 76,343,174  | 79,548,154  | 1 | 1 | 2 | 0 |
| Case 45 | 9 | 79,550,279  | 80,010,025  | 1 | 0 | 1 | 0 |
| Case 45 | 9 | 80,014,376  | 99,489,682  | 1 | 1 | 2 | 0 |
| Case 45 | 9 | 99,492,593  | 99,798,864  | 1 | 0 | 1 | 0 |

|         |    |             |             |   |   |   |   |
|---------|----|-------------|-------------|---|---|---|---|
| Case 45 | 9  | 99,798,927  | 109,446,277 | 1 | 1 | 2 | 0 |
| Case 45 | 9  | 109,459,475 | 109,857,771 | 2 | 1 | 3 | 0 |
| Case 45 | 9  | 109,862,984 | 113,371,069 | 1 | 1 | 2 | 0 |
| Case 45 | 9  | 113,372,027 | 113,686,353 | 2 | 0 | 2 | 1 |
| Case 45 | 9  | 113,690,028 | 115,815,398 | 1 | 1 | 2 | 0 |
| Case 45 | 9  | 115,817,156 | 115,821,485 | 2 | 1 | 3 | 0 |
| Case 45 | 9  | 115,852,715 | 115,885,060 | 5 | 0 | 5 | 1 |
| Case 45 | 9  | 115,893,229 | 116,978,430 | 1 | 1 | 2 | 0 |
| Case 45 | 9  | 116,979,172 | 117,278,844 | 2 | 0 | 2 | 1 |
| Case 45 | 9  | 117,282,390 | 127,572,128 | 1 | 1 | 2 | 0 |
| Case 45 | 9  | 127,572,229 | 128,641,097 | 2 | 0 | 2 | 1 |
| Case 45 | 9  | 128,643,415 | 132,082,564 | 1 | 1 | 2 | 0 |
| Case 45 | 9  | 132,084,144 | 132,549,493 | 2 | 0 | 2 | 1 |
| Case 45 | 9  | 132,549,740 | 135,365,590 | 1 | 1 | 2 | 0 |
| Case 45 | 9  | 135,371,169 | 137,762,857 | 2 | 0 | 2 | 1 |
| Case 45 | 9  | 137,764,457 | 139,077,343 | 1 | 1 | 2 | 0 |
| Case 45 | 9  | 139,082,796 | 139,295,091 | 1 | 0 | 1 | 0 |
| Case 45 | 9  | 139,295,282 | 139,483,954 | 1 | 1 | 2 | 0 |
| Case 45 | 9  | 139,487,092 | 139,756,883 | 1 | 0 | 1 | 0 |
| Case 45 | 9  | 139,757,327 | 140,006,432 | 2 | 0 | 2 | 1 |
| Case 45 | 9  | 140,006,491 | 140,376,668 | 1 | 0 | 1 | 0 |
| Case 45 | 9  | 140,379,078 | 141,066,491 | 2 | 0 | 2 | 1 |
| Case 45 | 10 | 98,087      | 5,286,162   | 1 | 1 | 2 | 0 |
| Case 45 | 10 | 5,286,600   | 6,511,386   | 2 | 1 | 3 | 0 |
| Case 45 | 10 | 6,512,559   | 13,841,470  | 1 | 1 | 2 | 0 |
| Case 45 | 10 | 13,843,530  | 14,183,105  | 2 | 1 | 3 | 0 |
| Case 45 | 10 | 14,183,371  | 26,580,926  | 1 | 1 | 2 | 0 |
| Case 45 | 10 | 26,581,855  | 31,124,111  | 2 | 0 | 2 | 1 |
| Case 45 | 10 | 31,125,508  | 32,483,340  | 1 | 1 | 2 | 0 |
| Case 45 | 10 | 32,487,433  | 38,121,693  | 3 | 0 | 3 | 1 |
| Case 45 | 10 | 38,122,021  | 39,097,912  | 2 | 0 | 2 | 1 |
| Case 45 | 10 | 42,436,301  | 44,196,014  | 2 | 0 | 2 | 1 |
| Case 45 | 10 | 44,196,101  | 55,825,382  | 2 | 1 | 3 | 0 |
| Case 45 | 10 | 55,825,695  | 59,719,339  | 2 | 0 | 2 | 1 |
| Case 45 | 10 | 59,724,388  | 76,855,505  | 2 | 1 | 3 | 0 |
| Case 45 | 10 | 76,855,542  | 77,710,913  | 2 | 0 | 2 | 1 |
| Case 45 | 10 | 77,719,862  | 84,099,660  | 2 | 1 | 3 | 0 |
| Case 45 | 10 | 84,100,509  | 85,191,870  | 1 | 1 | 2 | 0 |
| Case 45 | 10 | 85,193,946  | 85,409,604  | 2 | 0 | 2 | 1 |
| Case 45 | 10 | 85,419,023  | 88,259,792  | 2 | 1 | 3 | 0 |
| Case 45 | 10 | 88,259,835  | 89,755,075  | 1 | 1 | 2 | 0 |
| Case 45 | 10 | 89,756,206  | 91,465,118  | 2 | 1 | 3 | 0 |
| Case 45 | 10 | 91,465,167  | 92,303,944  | 1 | 1 | 2 | 0 |
| Case 45 | 10 | 92,304,910  | 93,565,641  | 2 | 1 | 3 | 0 |
| Case 45 | 10 | 93,572,811  | 94,868,454  | 1 | 1 | 2 | 0 |
| Case 45 | 10 | 94,868,976  | 95,352,983  | 2 | 1 | 3 | 0 |
| Case 45 | 10 | 95,353,604  | 96,961,777  | 1 | 1 | 2 | 0 |
| Case 45 | 10 | 96,965,662  | 97,375,268  | 2 | 1 | 3 | 0 |
| Case 45 | 10 | 97,376,235  | 97,987,254  | 1 | 1 | 2 | 0 |
| Case 45 | 10 | 97,987,265  | 98,416,614  | 2 | 1 | 3 | 0 |
| Case 45 | 10 | 98,417,930  | 100,713,090 | 1 | 1 | 2 | 0 |
| Case 45 | 10 | 100,716,236 | 101,458,358 | 2 | 1 | 3 | 0 |
| Case 45 | 10 | 101,459,040 | 105,349,923 | 1 | 1 | 2 | 0 |
| Case 45 | 10 | 105,349,988 | 105,651,940 | 2 | 1 | 3 | 0 |
| Case 45 | 10 | 105,651,955 | 106,492,420 | 1 | 1 | 2 | 0 |
| Case 45 | 10 | 106,498,526 | 107,022,160 | 2 | 1 | 3 | 0 |
| Case 45 | 10 | 107,022,174 | 111,992,222 | 1 | 1 | 2 | 0 |
| Case 45 | 10 | 112,001,009 | 116,595,381 | 2 | 1 | 3 | 0 |
| Case 45 | 10 | 116,596,071 | 118,357,676 | 1 | 1 | 2 | 0 |
| Case 45 | 10 | 118,357,677 | 118,653,607 | 2 | 1 | 3 | 0 |
| Case 45 | 10 | 118,661,316 | 121,742,431 | 1 | 1 | 2 | 0 |

|         |    |             |             |   |   |   |   |
|---------|----|-------------|-------------|---|---|---|---|
| Case 45 | 10 | 121,748,543 | 124,536,352 | 2 | 1 | 3 | 0 |
| Case 45 | 10 | 124,539,105 | 124,866,244 | 2 | 0 | 2 | 1 |
| Case 45 | 10 | 124,866,446 | 125,487,915 | 2 | 1 | 3 | 0 |
| Case 45 | 10 | 125,491,860 | 126,711,107 | 1 | 1 | 2 | 0 |
| Case 45 | 10 | 126,711,633 | 126,981,173 | 2 | 1 | 3 | 0 |
| Case 45 | 10 | 126,995,050 | 127,630,671 | 1 | 1 | 2 | 0 |
| Case 45 | 10 | 127,640,999 | 129,349,788 | 2 | 1 | 3 | 0 |
| Case 45 | 10 | 129,349,833 | 130,349,382 | 1 | 1 | 2 | 0 |
| Case 45 | 10 | 130,353,231 | 132,329,272 | 2 | 1 | 3 | 0 |
| Case 45 | 10 | 132,333,323 | 133,162,862 | 1 | 1 | 2 | 0 |
| Case 45 | 10 | 133,165,646 | 133,578,066 | 2 | 1 | 3 | 0 |
| Case 45 | 10 | 133,579,416 | 135,202,518 | 2 | 0 | 2 | 1 |
| Case 45 | 10 | 135,202,533 | 135,477,883 | 2 | 1 | 3 | 0 |
| Case 45 | 11 | 193,146     | 4,592,752   | 1 | 1 | 2 | 0 |
| Case 45 | 11 | 4,592,780   | 4,680,467   | 2 | 1 | 3 | 0 |
| Case 45 | 11 | 4,682,264   | 5,510,165   | 1 | 1 | 2 | 0 |
| Case 45 | 11 | 5,510,284   | 5,712,260   | 2 | 1 | 3 | 0 |
| Case 45 | 11 | 5,713,658   | 6,220,713   | 1 | 1 | 2 | 0 |
| Case 45 | 11 | 6,220,820   | 6,851,427   | 2 | 1 | 3 | 0 |
| Case 45 | 11 | 6,854,547   | 12,776,467  | 1 | 1 | 2 | 0 |
| Case 45 | 11 | 12,778,769  | 20,196,522  | 2 | 1 | 3 | 0 |
| Case 45 | 11 | 20,199,278  | 20,636,411  | 2 | 0 | 2 | 1 |
| Case 45 | 11 | 20,638,059  | 23,226,964  | 2 | 1 | 3 | 0 |
| Case 45 | 11 | 23,232,884  | 26,018,501  | 2 | 0 | 2 | 1 |
| Case 45 | 11 | 26,027,163  | 30,832,105  | 2 | 1 | 3 | 0 |
| Case 45 | 11 | 30,833,226  | 34,621,004  | 2 | 0 | 2 | 1 |
| Case 45 | 11 | 34,622,955  | 34,981,990  | 2 | 1 | 3 | 0 |
| Case 45 | 11 | 34,982,013  | 36,540,730  | 5 | 0 | 5 | 1 |
| Case 45 | 11 | 36,559,278  | 36,951,734  | 4 | 0 | 4 | 1 |
| Case 45 | 11 | 36,952,592  | 37,194,294  | 3 | 0 | 3 | 1 |
| Case 45 | 11 | 37,200,795  | 42,941,438  | 2 | 0 | 2 | 1 |
| Case 45 | 11 | 42,942,016  | 42,973,253  | 2 | 1 | 3 | 0 |
| Case 45 | 11 | 42,977,439  | 46,637,543  | 3 | 0 | 3 | 1 |
| Case 45 | 11 | 46,638,415  | 48,331,739  | 2 | 1 | 3 | 0 |
| Case 45 | 11 | 48,333,360  | 51,591,253  | 2 | 0 | 2 | 1 |
| Case 45 | 11 | 54,794,237  | 55,427,700  | 2 | 0 | 2 | 1 |
| Case 45 | 11 | 55,431,897  | 56,180,753  | 1 | 1 | 2 | 0 |
| Case 45 | 11 | 56,184,811  | 56,542,928  | 2 | 1 | 3 | 0 |
| Case 45 | 11 | 56,544,017  | 58,803,621  | 1 | 1 | 2 | 0 |
| Case 45 | 11 | 58,807,241  | 59,629,992  | 2 | 1 | 3 | 0 |
| Case 45 | 11 | 59,630,097  | 86,119,307  | 1 | 1 | 2 | 0 |
| Case 45 | 11 | 86,119,396  | 86,604,406  | 2 | 1 | 3 | 0 |
| Case 45 | 11 | 86,610,223  | 91,817,016  | 1 | 1 | 2 | 0 |
| Case 45 | 11 | 91,820,234  | 92,714,595  | 2 | 1 | 3 | 0 |
| Case 45 | 11 | 92,714,749  | 134,934,063 | 1 | 1 | 2 | 0 |
| Case 45 | 12 | 191,619     | 2,560,116   | 2 | 1 | 3 | 0 |
| Case 45 | 12 | 2,562,541   | 3,315,433   | 1 | 1 | 2 | 0 |
| Case 45 | 12 | 3,321,967   | 3,839,965   | 2 | 1 | 3 | 0 |
| Case 45 | 12 | 3,840,421   | 4,553,361   | 1 | 1 | 2 | 0 |
| Case 45 | 12 | 4,553,383   | 7,586,119   | 2 | 1 | 3 | 0 |
| Case 45 | 12 | 7,586,260   | 8,896,003   | 1 | 1 | 2 | 0 |
| Case 45 | 12 | 8,902,470   | 9,098,149   | 2 | 1 | 3 | 0 |
| Case 45 | 12 | 9,099,533   | 10,251,385  | 1 | 1 | 2 | 0 |
| Case 45 | 12 | 10,251,445  | 10,402,829  | 2 | 1 | 3 | 0 |
| Case 45 | 12 | 10,403,650  | 11,174,397  | 1 | 1 | 2 | 0 |
| Case 45 | 12 | 11,174,498  | 16,516,994  | 2 | 1 | 3 | 0 |
| Case 45 | 12 | 16,517,110  | 19,689,884  | 1 | 1 | 2 | 0 |
| Case 45 | 12 | 19,692,403  | 19,987,369  | 2 | 1 | 3 | 0 |
| Case 45 | 12 | 19,990,847  | 25,985,662  | 3 | 1 | 4 | 0 |
| Case 45 | 12 | 25,986,397  | 25,990,079  | 1 | 1 | 2 | 0 |
| Case 45 | 12 | 25,991,455  | 30,237,954  | 2 | 1 | 3 | 0 |

|         |    |             |             |   |   |   |   |
|---------|----|-------------|-------------|---|---|---|---|
| Case 45 | 12 | 30,241,143  | 31,006,982  | 1 | 1 | 2 | 0 |
| Case 45 | 12 | 31,007,046  | 31,296,219  | 2 | 1 | 3 | 0 |
| Case 45 | 12 | 31,310,983  | 32,322,171  | 1 | 1 | 2 | 0 |
| Case 45 | 12 | 32,323,357  | 33,510,302  | 2 | 1 | 3 | 0 |
| Case 45 | 12 | 33,510,325  | 34,853,011  | 1 | 1 | 2 | 0 |
| Case 45 | 12 | 37,876,400  | 41,587,983  | 1 | 1 | 2 | 0 |
| Case 45 | 12 | 41,589,330  | 42,227,928  | 2 | 1 | 3 | 0 |
| Case 45 | 12 | 42,232,335  | 43,064,657  | 1 | 1 | 2 | 0 |
| Case 45 | 12 | 43,066,023  | 43,628,705  | 2 | 1 | 3 | 0 |
| Case 45 | 12 | 43,629,838  | 44,176,863  | 1 | 1 | 2 | 0 |
| Case 45 | 12 | 44,177,508  | 63,040,272  | 2 | 1 | 3 | 0 |
| Case 45 | 12 | 63,040,610  | 63,044,181  | 2 | 2 | 4 | 0 |
| Case 45 | 12 | 63,047,232  | 63,047,232  | 2 | 0 | 2 | 1 |
| Case 45 | 12 | 63,048,066  | 68,495,027  | 2 | 2 | 4 | 0 |
| Case 45 | 12 | 68,496,077  | 68,592,860  | 3 | 0 | 3 | 1 |
| Case 45 | 12 | 68,593,207  | 73,231,379  | 2 | 1 | 3 | 0 |
| Case 45 | 12 | 73,243,456  | 75,875,623  | 1 | 1 | 2 | 0 |
| Case 45 | 12 | 75,875,683  | 76,352,699  | 2 | 1 | 3 | 0 |
| Case 45 | 12 | 76,353,333  | 77,313,694  | 1 | 1 | 2 | 0 |
| Case 45 | 12 | 77,314,054  | 78,844,480  | 2 | 1 | 3 | 0 |
| Case 45 | 12 | 78,845,774  | 88,582,702  | 1 | 1 | 2 | 0 |
| Case 45 | 12 | 88,584,312  | 90,084,686  | 2 | 1 | 3 | 0 |
| Case 45 | 12 | 90,089,881  | 92,430,585  | 1 | 1 | 2 | 0 |
| Case 45 | 12 | 92,443,257  | 93,125,065  | 2 | 1 | 3 | 0 |
| Case 45 | 12 | 93,128,881  | 95,695,260  | 1 | 1 | 2 | 0 |
| Case 45 | 12 | 95,695,804  | 96,409,429  | 2 | 1 | 3 | 0 |
| Case 45 | 12 | 96,412,663  | 98,360,455  | 1 | 1 | 2 | 0 |
| Case 45 | 12 | 98,362,486  | 99,640,557  | 2 | 1 | 3 | 0 |
| Case 45 | 12 | 99,643,543  | 101,017,496 | 1 | 1 | 2 | 0 |
| Case 45 | 12 | 101,017,586 | 102,182,181 | 2 | 1 | 3 | 0 |
| Case 45 | 12 | 102,182,354 | 103,063,548 | 1 | 1 | 2 | 0 |
| Case 45 | 12 | 103,071,086 | 106,929,121 | 2 | 1 | 3 | 0 |
| Case 45 | 12 | 106,930,117 | 112,589,679 | 1 | 1 | 2 | 0 |
| Case 45 | 12 | 112,590,254 | 117,820,208 | 2 | 1 | 3 | 0 |
| Case 45 | 12 | 117,822,187 | 118,504,457 | 1 | 1 | 2 | 0 |
| Case 45 | 12 | 118,506,188 | 120,150,196 | 2 | 1 | 3 | 0 |
| Case 45 | 12 | 120,151,405 | 123,934,070 | 1 | 1 | 2 | 0 |
| Case 45 | 12 | 123,950,117 | 124,413,089 | 2 | 1 | 3 | 0 |
| Case 45 | 12 | 124,413,109 | 133,810,935 | 1 | 1 | 2 | 0 |
| Case 45 | 13 | 19,058,717  | 19,147,562  | 1 | 1 | 2 | 0 |
| Case 45 | 13 | 19,198,770  | 20,641,076  | 1 | 0 | 1 | 0 |
| Case 45 | 13 | 20,645,490  | 21,146,232  | 2 | 0 | 2 | 1 |
| Case 45 | 13 | 21,148,610  | 21,483,113  | 1 | 0 | 1 | 0 |
| Case 45 | 13 | 21,483,892  | 23,338,254  | 2 | 0 | 2 | 1 |
| Case 45 | 13 | 23,338,363  | 23,483,716  | 1 | 0 | 1 | 0 |
| Case 45 | 13 | 23,496,997  | 25,919,996  | 2 | 0 | 2 | 1 |
| Case 45 | 13 | 25,933,438  | 32,893,271  | 3 | 0 | 3 | 1 |
| Case 45 | 13 | 32,893,321  | 33,521,094  | 2 | 0 | 2 | 1 |
| Case 45 | 13 | 33,521,878  | 37,574,714  | 3 | 0 | 3 | 1 |
| Case 45 | 13 | 37,580,090  | 39,263,609  | 2 | 0 | 2 | 1 |
| Case 45 | 13 | 39,263,614  | 39,786,449  | 3 | 0 | 3 | 1 |
| Case 45 | 13 | 39,790,660  | 40,566,699  | 2 | 0 | 2 | 1 |
| Case 45 | 13 | 40,569,328  | 48,849,803  | 2 | 2 | 4 | 0 |
| Case 45 | 13 | 48,858,347  | 49,438,945  | 3 | 0 | 3 | 1 |
| Case 45 | 13 | 49,438,988  | 53,447,952  | 2 | 1 | 3 | 0 |
| Case 45 | 13 | 53,453,283  | 54,073,784  | 3 | 0 | 3 | 1 |
| Case 45 | 13 | 54,094,733  | 55,345,049  | 2 | 0 | 2 | 1 |
| Case 45 | 13 | 55,350,946  | 56,925,225  | 2 | 2 | 4 | 0 |
| Case 45 | 13 | 56,932,778  | 63,237,821  | 3 | 0 | 3 | 1 |
| Case 45 | 13 | 63,242,341  | 63,306,408  | 2 | 0 | 2 | 1 |
| Case 45 | 13 | 63,309,208  | 63,629,157  | 0 | 0 | 0 | 0 |

|         |    |             |             |   |   |   |   |
|---------|----|-------------|-------------|---|---|---|---|
| Case 45 | 13 | 63,638,329  | 63,735,240  | 2 | 1 | 3 | 0 |
| Case 45 | 13 | 63,739,209  | 64,890,976  | 3 | 0 | 3 | 1 |
| Case 45 | 13 | 64,902,490  | 65,230,635  | 2 | 0 | 2 | 1 |
| Case 45 | 13 | 65,234,678  | 66,201,577  | 4 | 0 | 4 | 1 |
| Case 45 | 13 | 66,201,817  | 72,712,489  | 3 | 0 | 3 | 1 |
| Case 45 | 13 | 72,714,839  | 72,760,162  | 2 | 0 | 2 | 1 |
| Case 45 | 13 | 72,763,078  | 73,104,490  | 4 | 0 | 4 | 1 |
| Case 45 | 13 | 73,108,279  | 73,631,873  | 3 | 0 | 3 | 1 |
| Case 45 | 13 | 73,633,073  | 73,636,581  | 2 | 0 | 2 | 1 |
| Case 45 | 13 | 73,636,590  | 74,433,807  | 4 | 0 | 4 | 1 |
| Case 45 | 13 | 74,434,331  | 85,445,776  | 3 | 0 | 3 | 1 |
| Case 45 | 13 | 85,455,473  | 85,925,245  | 2 | 0 | 2 | 1 |
| Case 45 | 13 | 85,925,549  | 86,395,541  | 3 | 0 | 3 | 1 |
| Case 45 | 13 | 86,403,470  | 90,233,991  | 2 | 0 | 2 | 1 |
| Case 45 | 13 | 90,234,944  | 90,808,818  | 3 | 0 | 3 | 1 |
| Case 45 | 13 | 90,809,966  | 115,103,529 | 2 | 0 | 2 | 1 |
| Case 45 | 14 | 19,280,733  | 19,964,076  | 2 | 1 | 3 | 0 |
| Case 45 | 14 | 20,213,937  | 20,426,742  | 5 | 0 | 5 | 1 |
| Case 45 | 14 | 20,432,664  | 20,665,538  | 2 | 0 | 2 | 1 |
| Case 45 | 14 | 20,665,556  | 22,338,141  | 2 | 1 | 3 | 0 |
| Case 45 | 14 | 22,338,459  | 23,001,848  | 3 | 1 | 4 | 0 |
| Case 45 | 14 | 23,002,684  | 23,011,465  | 1 | 1 | 2 | 0 |
| Case 45 | 14 | 23,012,544  | 24,117,611  | 2 | 1 | 3 | 0 |
| Case 45 | 14 | 24,119,861  | 24,302,673  | 2 | 0 | 2 | 1 |
| Case 45 | 14 | 24,305,559  | 26,211,789  | 2 | 1 | 3 | 0 |
| Case 45 | 14 | 26,218,549  | 32,389,856  | 2 | 0 | 2 | 1 |
| Case 45 | 14 | 32,390,458  | 33,379,685  | 2 | 1 | 3 | 0 |
| Case 45 | 14 | 33,380,805  | 33,913,395  | 2 | 0 | 2 | 1 |
| Case 45 | 14 | 33,913,544  | 34,618,330  | 2 | 1 | 3 | 0 |
| Case 45 | 14 | 34,618,856  | 34,697,855  | 3 | 0 | 3 | 1 |
| Case 45 | 14 | 34,698,192  | 39,982,933  | 2 | 0 | 2 | 1 |
| Case 45 | 14 | 39,988,733  | 40,353,756  | 2 | 1 | 3 | 0 |
| Case 45 | 14 | 40,353,935  | 55,655,872  | 2 | 0 | 2 | 1 |
| Case 45 | 14 | 55,658,259  | 56,831,864  | 3 | 0 | 3 | 1 |
| Case 45 | 14 | 56,839,801  | 61,520,070  | 2 | 0 | 2 | 1 |
| Case 45 | 14 | 61,536,933  | 63,792,501  | 3 | 0 | 3 | 1 |
| Case 45 | 14 | 63,796,122  | 104,378,232 | 2 | 0 | 2 | 1 |
| Case 45 | 14 | 104,381,411 | 107,287,663 | 1 | 1 | 2 | 0 |
| Case 45 | 15 | 20,034,919  | 29,905,940  | 1 | 1 | 2 | 0 |
| Case 45 | 15 | 29,906,219  | 30,919,043  | 2 | 0 | 2 | 1 |
| Case 45 | 15 | 30,927,362  | 31,089,526  | 0 | 0 | 0 | 0 |
| Case 45 | 15 | 31,094,479  | 37,495,601  | 1 | 1 | 2 | 0 |
| Case 45 | 15 | 37,496,211  | 38,105,689  | 2 | 0 | 2 | 1 |
| Case 45 | 15 | 38,106,163  | 39,062,418  | 2 | 1 | 3 | 0 |
| Case 45 | 15 | 39,063,641  | 42,144,480  | 1 | 1 | 2 | 0 |
| Case 45 | 15 | 42,145,167  | 42,184,794  | 1 | 0 | 1 | 0 |
| Case 45 | 15 | 42,185,117  | 51,294,832  | 1 | 1 | 2 | 0 |
| Case 45 | 15 | 51,295,934  | 51,673,125  | 2 | 1 | 3 | 0 |
| Case 45 | 15 | 51,673,382  | 57,057,885  | 1 | 1 | 2 | 0 |
| Case 45 | 15 | 57,065,787  | 63,862,721  | 2 | 1 | 3 | 0 |
| Case 45 | 15 | 63,866,584  | 64,147,817  | 1 | 1 | 2 | 0 |
| Case 45 | 15 | 64,149,602  | 65,155,528  | 2 | 1 | 3 | 0 |
| Case 45 | 15 | 65,157,203  | 65,273,595  | 1 | 1 | 2 | 0 |
| Case 45 | 15 | 65,281,624  | 65,703,684  | 2 | 0 | 2 | 1 |
| Case 45 | 15 | 65,706,569  | 75,498,642  | 2 | 1 | 3 | 0 |
| Case 45 | 15 | 75,498,681  | 76,313,121  | 2 | 0 | 2 | 1 |
| Case 45 | 15 | 76,315,542  | 102,461,162 | 2 | 1 | 3 | 0 |
| Case 45 | 16 | 88,165      | 772,126     | 2 | 0 | 2 | 1 |
| Case 45 | 16 | 772,447     | 865,040     | 1 | 0 | 1 | 0 |
| Case 45 | 16 | 866,053     | 1,143,547   | 2 | 0 | 2 | 1 |
| Case 45 | 16 | 1,143,577   | 1,201,854   | 0 | 0 | 0 | 0 |

|         |    |            |            |   |   |   |   |
|---------|----|------------|------------|---|---|---|---|
| Case 45 | 16 | 1,211,457  | 1,273,591  | 1 | 0 | 1 | 0 |
| Case 45 | 16 | 1,273,638  | 4,353,057  | 2 | 0 | 2 | 1 |
| Case 45 | 16 | 4,359,421  | 4,455,535  | 1 | 0 | 1 | 0 |
| Case 45 | 16 | 4,455,553  | 6,577,413  | 2 | 0 | 2 | 1 |
| Case 45 | 16 | 6,580,275  | 28,003,221 | 2 | 1 | 3 | 0 |
| Case 45 | 16 | 28,003,858 | 30,771,757 | 2 | 0 | 2 | 1 |
| Case 45 | 16 | 30,771,928 | 35,285,582 | 1 | 1 | 2 | 0 |
| Case 45 | 16 | 46,450,037 | 46,846,663 | 1 | 1 | 2 | 0 |
| Case 45 | 16 | 46,848,522 | 50,375,955 | 2 | 1 | 3 | 0 |
| Case 45 | 16 | 50,384,068 | 88,105,725 | 2 | 0 | 2 | 1 |
| Case 45 | 16 | 88,105,732 | 89,813,093 | 1 | 0 | 1 | 0 |
| Case 45 | 16 | 89,814,188 | 90,274,695 | 2 | 0 | 2 | 1 |
| Case 45 | 17 | 11,885     | 1,457,839  | 2 | 0 | 2 | 1 |
| Case 45 | 17 | 1,459,155  | 1,576,562  | 1 | 0 | 1 | 0 |
| Case 45 | 17 | 1,579,300  | 10,296,152 | 2 | 0 | 2 | 1 |
| Case 45 | 17 | 10,297,619 | 10,402,312 | 1 | 0 | 1 | 0 |
| Case 45 | 17 | 10,402,398 | 18,051,447 | 2 | 0 | 2 | 1 |
| Case 45 | 17 | 18,051,861 | 18,148,541 | 1 | 0 | 1 | 0 |
| Case 45 | 17 | 18,148,549 | 21,183,193 | 2 | 0 | 2 | 1 |
| Case 45 | 17 | 21,186,360 | 22,242,355 | 2 | 1 | 3 | 0 |
| Case 45 | 17 | 25,268,142 | 27,579,212 | 2 | 1 | 3 | 0 |
| Case 45 | 17 | 27,580,756 | 28,182,685 | 5 | 0 | 5 | 1 |
| Case 45 | 17 | 28,183,059 | 30,435,777 | 2 | 0 | 2 | 1 |
| Case 45 | 17 | 30,441,015 | 34,436,708 | 2 | 1 | 3 | 0 |
| Case 45 | 17 | 34,443,811 | 34,819,191 | 5 | 0 | 5 | 1 |
| Case 45 | 17 | 34,819,750 | 34,958,708 | 2 | 0 | 2 | 1 |
| Case 45 | 17 | 34,959,002 | 34,964,807 | 1 | 1 | 2 | 0 |
| Case 45 | 17 | 34,964,977 | 36,916,599 | 2 | 1 | 3 | 0 |
| Case 45 | 17 | 36,920,386 | 38,040,763 | 2 | 0 | 2 | 1 |
| Case 45 | 17 | 38,049,233 | 42,254,161 | 2 | 1 | 3 | 0 |
| Case 45 | 17 | 42,254,165 | 42,828,484 | 2 | 0 | 2 | 1 |
| Case 45 | 17 | 42,828,512 | 51,370,626 | 2 | 1 | 3 | 0 |
| Case 45 | 17 | 51,400,864 | 51,865,320 | 2 | 0 | 2 | 1 |
| Case 45 | 17 | 51,872,214 | 56,355,424 | 2 | 1 | 3 | 0 |
| Case 45 | 17 | 56,356,502 | 57,232,365 | 2 | 0 | 2 | 1 |
| Case 45 | 17 | 57,239,628 | 58,282,990 | 2 | 1 | 3 | 0 |
| Case 45 | 17 | 58,283,007 | 59,067,526 | 1 | 1 | 2 | 0 |
| Case 45 | 17 | 59,070,573 | 72,584,704 | 2 | 1 | 3 | 0 |
| Case 45 | 17 | 72,584,730 | 73,552,128 | 2 | 0 | 2 | 1 |
| Case 45 | 17 | 73,552,176 | 74,834,320 | 1 | 1 | 2 | 0 |
| Case 45 | 17 | 74,844,617 | 78,078,709 | 2 | 1 | 3 | 0 |
| Case 45 | 17 | 78,078,931 | 78,402,423 | 2 | 0 | 2 | 1 |
| Case 45 | 17 | 78,403,190 | 78,708,418 | 2 | 1 | 3 | 0 |
| Case 45 | 17 | 78,712,423 | 81,060,040 | 1 | 1 | 2 | 0 |
| Case 45 | 18 | 87,505     | 15,375,878 | 2 | 1 | 3 | 0 |
| Case 45 | 18 | 18,520,354 | 18,539,806 | 2 | 1 | 3 | 0 |
| Case 45 | 18 | 18,546,896 | 23,920,314 | 5 | 0 | 5 | 1 |
| Case 45 | 18 | 23,927,627 | 24,821,455 | 7 | 0 | 7 | 1 |
| Case 45 | 18 | 24,827,956 | 26,247,805 | 1 | 1 | 2 | 0 |
| Case 45 | 18 | 26,250,678 | 27,967,002 | 1 | 0 | 1 | 0 |
| Case 45 | 18 | 27,967,522 | 29,419,309 | 1 | 1 | 2 | 0 |
| Case 45 | 18 | 29,424,289 | 29,554,990 | 1 | 0 | 1 | 0 |
| Case 45 | 18 | 29,558,592 | 30,481,131 | 1 | 1 | 2 | 0 |
| Case 45 | 18 | 30,488,989 | 30,969,567 | 1 | 0 | 1 | 0 |
| Case 45 | 18 | 30,969,588 | 62,493,986 | 1 | 1 | 2 | 0 |
| Case 45 | 18 | 62,494,385 | 64,596,027 | 1 | 0 | 1 | 0 |
| Case 45 | 18 | 64,596,586 | 65,321,972 | 1 | 1 | 2 | 0 |
| Case 45 | 18 | 65,324,484 | 66,162,830 | 1 | 0 | 1 | 0 |
| Case 45 | 18 | 66,167,919 | 68,508,072 | 1 | 1 | 2 | 0 |
| Case 45 | 18 | 68,511,177 | 69,917,793 | 1 | 0 | 1 | 0 |
| Case 45 | 18 | 69,921,381 | 78,015,180 | 1 | 1 | 2 | 0 |

|         |    |             |             |   |   |   |   |
|---------|----|-------------|-------------|---|---|---|---|
| Case 45 | 19 | 260,912     | 430,690     | 2 | 0 | 2 | 1 |
| Case 45 | 19 | 434,847     | 1,506,135   | 1 | 0 | 1 | 0 |
| Case 45 | 19 | 1,506,219   | 4,445,156   | 2 | 0 | 2 | 1 |
| Case 45 | 19 | 4,445,541   | 4,511,094   | 1 | 0 | 1 | 0 |
| Case 45 | 19 | 4,511,099   | 8,131,240   | 2 | 0 | 2 | 1 |
| Case 45 | 19 | 8,131,366   | 8,152,017   | 1 | 0 | 1 | 0 |
| Case 45 | 19 | 8,152,083   | 9,361,722   | 2 | 0 | 2 | 1 |
| Case 45 | 19 | 9,361,775   | 9,921,613   | 1 | 0 | 1 | 0 |
| Case 45 | 19 | 9,921,657   | 11,881,451  | 2 | 0 | 2 | 1 |
| Case 45 | 19 | 11,885,777  | 12,692,001  | 1 | 0 | 1 | 0 |
| Case 45 | 19 | 12,692,033  | 21,107,489  | 2 | 0 | 2 | 1 |
| Case 45 | 19 | 21,115,015  | 21,740,058  | 0 | 0 | 0 | 0 |
| Case 45 | 19 | 21,740,932  | 23,776,033  | 2 | 0 | 2 | 1 |
| Case 45 | 19 | 23,793,270  | 24,629,285  | 1 | 0 | 1 | 0 |
| Case 45 | 19 | 27,732,159  | 28,127,201  | 1 | 0 | 1 | 0 |
| Case 45 | 19 | 28,144,500  | 49,167,993  | 2 | 1 | 3 | 0 |
| Case 45 | 19 | 49,168,000  | 49,183,284  | 2 | 0 | 2 | 1 |
| Case 45 | 19 | 49,184,380  | 49,206,462  | 0 | 0 | 0 | 0 |
| Case 45 | 19 | 49,206,631  | 59,097,160  | 2 | 1 | 3 | 0 |
| Case 45 | 20 | 63,244      | 15,028,034  | 1 | 1 | 2 | 0 |
| Case 45 | 20 | 15,028,962  | 26,293,985  | 2 | 0 | 2 | 1 |
| Case 45 | 20 | 29,425,357  | 29,530,880  | 2 | 0 | 2 | 1 |
| Case 45 | 20 | 29,540,629  | 30,616,839  | 2 | 1 | 3 | 0 |
| Case 45 | 20 | 30,618,787  | 43,837,137  | 1 | 1 | 2 | 0 |
| Case 45 | 20 | 43,837,238  | 44,329,242  | 2 | 1 | 3 | 0 |
| Case 45 | 20 | 44,330,799  | 51,643,760  | 1 | 1 | 2 | 0 |
| Case 45 | 20 | 51,645,136  | 51,881,039  | 2 | 1 | 3 | 0 |
| Case 45 | 20 | 51,884,213  | 52,403,556  | 1 | 1 | 2 | 0 |
| Case 45 | 20 | 52,407,781  | 53,095,149  | 2 | 1 | 3 | 0 |
| Case 45 | 20 | 53,098,135  | 55,590,529  | 1 | 1 | 2 | 0 |
| Case 45 | 20 | 55,595,951  | 56,098,315  | 2 | 0 | 2 | 1 |
| Case 45 | 20 | 56,098,733  | 62,948,788  | 1 | 1 | 2 | 0 |
| Case 45 | 21 | 10,827,533  | 10,971,337  | 1 | 1 | 2 | 0 |
| Case 45 | 21 | 14,368,320  | 26,211,052  | 1 | 1 | 2 | 0 |
| Case 45 | 21 | 26,215,045  | 27,854,701  | 2 | 1 | 3 | 0 |
| Case 45 | 21 | 27,858,006  | 47,809,254  | 1 | 1 | 2 | 0 |
| Case 45 | 21 | 47,810,597  | 47,931,423  | 1 | 0 | 1 | 0 |
| Case 45 | 21 | 47,931,446  | 48,100,155  | 1 | 1 | 2 | 0 |
| Case 45 | 22 | 16,114,244  | 17,593,685  | 1 | 1 | 2 | 0 |
| Case 45 | 22 | 17,594,915  | 18,609,854  | 2 | 1 | 3 | 0 |
| Case 45 | 22 | 18,610,110  | 32,939,476  | 1 | 1 | 2 | 0 |
| Case 45 | 22 | 32,939,719  | 33,388,996  | 2 | 1 | 3 | 0 |
| Case 45 | 22 | 33,393,651  | 51,195,728  | 1 | 1 | 2 | 0 |
| Case 47 | 1  | 82,154      | 7,955,894   | 1 | 1 | 2 | 0 |
| Case 47 | 1  | 7,961,206   | 8,274,018   | 1 | 0 | 1 | 0 |
| Case 47 | 1  | 8,274,807   | 93,651,547  | 1 | 1 | 2 | 0 |
| Case 47 | 1  | 93,651,937  | 93,730,380  | 1 | 0 | 1 | 0 |
| Case 47 | 1  | 93,730,427  | 109,366,554 | 1 | 1 | 2 | 0 |
| Case 47 | 1  | 109,367,944 | 109,371,874 | 0 | 0 | 0 | 0 |
| Case 47 | 1  | 109,373,214 | 121,346,616 | 1 | 1 | 2 | 0 |
| Case 47 | 1  | 142,649,718 | 249,218,992 | 1 | 1 | 2 | 0 |
| Case 47 | 2  | 18,674      | 92,081,640  | 1 | 1 | 2 | 0 |
| Case 47 | 2  | 95,429,424  | 243,048,760 | 1 | 1 | 2 | 0 |
| Case 47 | 3  | 61,495      | 90,442,925  | 1 | 1 | 2 | 0 |
| Case 47 | 3  | 93,537,290  | 180,328,142 | 1 | 1 | 2 | 0 |
| Case 47 | 3  | 180,328,194 | 180,337,700 | 0 | 0 | 0 | 0 |
| Case 47 | 3  | 180,342,293 | 197,838,262 | 1 | 1 | 2 | 0 |
| Case 47 | 4  | 71,566      | 331,372     | 1 | 1 | 2 | 0 |
| Case 47 | 4  | 333,310     | 438,080     | 1 | 0 | 1 | 0 |
| Case 47 | 4  | 442,021     | 49,620,898  | 1 | 1 | 2 | 0 |
| Case 47 | 4  | 52,697,856  | 190,963,766 | 1 | 1 | 2 | 0 |



|         |    |             |             |   |   |   |   |
|---------|----|-------------|-------------|---|---|---|---|
| Case 47 | 5  | 38,139      | 46,399,093  | 1 | 1 | 2 | 0 |
| Case 47 | 5  | 49,457,282  | 139,931,613 | 1 | 1 | 2 | 0 |
| Case 47 | 5  | 139,931,617 | 139,931,652 | 0 | 0 | 0 | 0 |
| Case 47 | 5  | 139,931,653 | 160,537,180 | 1 | 1 | 2 | 0 |
| Case 47 | 5  | 160,537,832 | 160,548,374 | 0 | 0 | 0 | 0 |
| Case 47 | 5  | 160,551,087 | 180,693,127 | 1 | 1 | 2 | 0 |
| Case 47 | 6  | 108,666     | 31,355,119  | 1 | 1 | 2 | 0 |
| Case 47 | 6  | 31,355,318  | 31,456,567  | 0 | 0 | 0 | 0 |
| Case 47 | 6  | 31,457,633  | 58,752,089  | 1 | 1 | 2 | 0 |
| Case 47 | 6  | 61,891,118  | 80,555,040  | 1 | 1 | 2 | 0 |
| Case 47 | 6  | 80,558,480  | 80,569,885  | 0 | 0 | 0 | 0 |
| Case 47 | 6  | 80,572,483  | 170,980,171 | 1 | 1 | 2 | 0 |
| Case 47 | 7  | 44,935      | 98,795      | 3 | 0 | 3 | 1 |
| Case 47 | 7  | 98,977      | 57,453,615  | 2 | 1 | 3 | 0 |
| Case 47 | 7  | 57,455,018  | 58,019,061  | 2 | 0 | 2 | 1 |
| Case 47 | 7  | 61,056,053  | 62,140,786  | 2 | 0 | 2 | 1 |
| Case 47 | 7  | 62,154,874  | 62,577,770  | 1 | 0 | 1 | 0 |
| Case 47 | 7  | 62,627,173  | 100,633,938 | 2 | 1 | 3 | 0 |
| Case 47 | 7  | 100,634,145 | 100,731,873 | 2 | 0 | 2 | 1 |
| Case 47 | 7  | 100,732,190 | 159,119,486 | 2 | 1 | 3 | 0 |
| Case 47 | 8  | 164,984     | 43,791,691  | 3 | 0 | 3 | 1 |
| Case 47 | 8  | 46,886,735  | 146,293,414 | 3 | 0 | 3 | 1 |
| Case 47 | 9  | 46,587      | 46,944,322  | 2 | 1 | 3 | 0 |
| Case 47 | 9  | 65,629,772  | 94,951,819  | 2 | 1 | 3 | 0 |
| Case 47 | 9  | 94,962,103  | 95,142,122  | 2 | 0 | 2 | 1 |
| Case 47 | 9  | 95,144,650  | 138,480,486 | 2 | 1 | 3 | 0 |
| Case 47 | 9  | 138,482,453 | 138,876,604 | 2 | 0 | 2 | 1 |
| Case 47 | 9  | 138,877,266 | 141,066,491 | 2 | 1 | 3 | 0 |
| Case 47 | 10 | 98,087      | 8,819,909   | 1 | 1 | 2 | 0 |
| Case 47 | 10 | 8,826,168   | 8,847,765   | 0 | 0 | 0 | 0 |
| Case 47 | 10 | 8,851,255   | 39,097,912  | 1 | 1 | 2 | 0 |
| Case 47 | 10 | 42,436,301  | 72,855,411  | 1 | 1 | 2 | 0 |
| Case 47 | 10 | 72,857,415  | 72,880,512  | 0 | 0 | 0 | 0 |
| Case 47 | 10 | 72,883,868  | 73,140,004  | 2 | 0 | 2 | 1 |
| Case 47 | 10 | 73,141,020  | 73,270,925  | 1 | 0 | 1 | 0 |
| Case 47 | 10 | 73,270,959  | 73,571,718  | 2 | 0 | 2 | 1 |
| Case 47 | 10 | 73,571,727  | 73,761,015  | 1 | 0 | 1 | 0 |
| Case 47 | 10 | 73,761,723  | 73,848,075  | 2 | 0 | 2 | 1 |
| Case 47 | 10 | 73,849,472  | 75,245,252  | 1 | 0 | 1 | 0 |
| Case 47 | 10 | 75,256,424  | 88,683,223  | 1 | 1 | 2 | 0 |
| Case 47 | 10 | 88,688,336  | 88,768,121  | 1 | 0 | 1 | 0 |
| Case 47 | 10 | 88,768,625  | 91,936,247  | 0 | 0 | 0 | 0 |
| Case 47 | 10 | 91,939,348  | 92,002,112  | 2 | 0 | 2 | 1 |
| Case 47 | 10 | 92,004,794  | 92,528,523  | 1 | 0 | 1 | 0 |
| Case 47 | 10 | 92,542,499  | 135,477,883 | 1 | 1 | 2 | 0 |
| Case 47 | 11 | 193,146     | 5,878,836   | 1 | 1 | 2 | 0 |
| Case 47 | 11 | 5,899,862   | 5,908,939   | 3 | 1 | 4 | 0 |
| Case 47 | 11 | 5,915,809   | 5,934,737   | 3 | 0 | 3 | 1 |
| Case 47 | 11 | 5,954,809   | 51,591,253  | 1 | 1 | 2 | 0 |
| Case 47 | 11 | 54,794,237  | 55,362,955  | 1 | 1 | 2 | 0 |
| Case 47 | 11 | 55,370,325  | 55,427,700  | 0 | 0 | 0 | 0 |
| Case 47 | 11 | 55,431,897  | 134,934,063 | 1 | 1 | 2 | 0 |
| Case 47 | 12 | 191,619     | 7,993,316   | 1 | 1 | 2 | 0 |
| Case 47 | 12 | 8,000,912   | 8,123,306   | 4 | 0 | 4 | 1 |
| Case 47 | 12 | 8,125,745   | 29,648,191  | 1 | 1 | 2 | 0 |
| Case 47 | 12 | 29,648,262  | 29,648,367  | 0 | 0 | 0 | 0 |
| Case 47 | 12 | 29,648,764  | 34,544,679  | 1 | 1 | 2 | 0 |
| Case 47 | 12 | 34,565,016  | 34,853,011  | 1 | 0 | 1 | 0 |
| Case 47 | 12 | 37,876,400  | 38,514,872  | 1 | 0 | 1 | 0 |
| Case 47 | 12 | 38,528,487  | 133,810,935 | 1 | 1 | 2 | 0 |
| Case 47 | 13 | 19,058,717  | 115,103,529 | 1 | 1 | 2 | 0 |

|         |    |            |             |   |   |   |   |
|---------|----|------------|-------------|---|---|---|---|
| Case 47 | 14 | 19,280,733 | 20,404,736  | 1 | 0 | 1 | 0 |
| Case 47 | 14 | 20,416,499 | 107,287,663 | 1 | 1 | 2 | 0 |
| Case 47 | 15 | 20,034,919 | 20,212,798  | 1 | 1 | 2 | 0 |
| Case 47 | 15 | 20,612,840 | 22,383,299  | 1 | 0 | 1 | 0 |
| Case 47 | 15 | 22,410,067 | 102,461,162 | 1 | 1 | 2 | 0 |
| Case 47 | 16 | 88,165     | 35,285,582  | 1 | 1 | 2 | 0 |
| Case 47 | 16 | 46,450,037 | 89,576,947  | 1 | 1 | 2 | 0 |
| Case 47 | 16 | 89,576,958 | 89,592,774  | 0 | 0 | 0 | 0 |
| Case 47 | 16 | 89,596,106 | 90,274,695  | 1 | 1 | 2 | 0 |
| Case 47 | 17 | 11,885     | 402,843     | 2 | 0 | 2 | 1 |
| Case 47 | 17 | 404,617    | 4,350,640   | 1 | 0 | 1 | 0 |
| Case 47 | 17 | 4,351,510  | 4,458,515   | 2 | 0 | 2 | 1 |
| Case 47 | 17 | 4,458,516  | 5,961,645   | 1 | 0 | 1 | 0 |
| Case 47 | 17 | 5,962,525  | 6,106,486   | 2 | 0 | 2 | 1 |
| Case 47 | 17 | 6,107,113  | 6,331,702   | 1 | 0 | 1 | 0 |
| Case 47 | 17 | 6,331,720  | 6,499,498   | 2 | 0 | 2 | 1 |
| Case 47 | 17 | 6,499,540  | 7,903,610   | 1 | 0 | 1 | 0 |
| Case 47 | 17 | 7,907,178  | 7,984,157   | 2 | 0 | 2 | 1 |
| Case 47 | 17 | 7,984,203  | 10,689,671  | 1 | 0 | 1 | 0 |
| Case 47 | 17 | 10,692,593 | 10,919,459  | 2 | 0 | 2 | 1 |
| Case 47 | 17 | 10,919,525 | 20,865,108  | 1 | 0 | 1 | 0 |
| Case 47 | 17 | 20,866,865 | 22,242,355  | 1 | 1 | 2 | 0 |
| Case 47 | 17 | 25,268,142 | 25,268,142  | 1 | 1 | 2 | 0 |
| Case 47 | 17 | 25,295,032 | 81,060,040  | 2 | 1 | 3 | 0 |
| Case 47 | 18 | 87,505     | 1,473,445   | 2 | 0 | 2 | 1 |
| Case 47 | 18 | 1,485,159  | 1,742,207   | 1 | 0 | 1 | 0 |
| Case 47 | 18 | 1,742,272  | 2,641,753   | 2 | 0 | 2 | 1 |
| Case 47 | 18 | 2,641,858  | 2,825,377   | 1 | 0 | 1 | 0 |
| Case 47 | 18 | 2,825,418  | 9,251,236   | 2 | 0 | 2 | 1 |
| Case 47 | 18 | 9,254,308  | 9,258,814   | 1 | 0 | 1 | 0 |
| Case 47 | 18 | 9,264,690  | 15,049,329  | 2 | 0 | 2 | 1 |
| Case 47 | 18 | 15,069,726 | 15,375,878  | 0 | 0 | 0 | 0 |
| Case 47 | 18 | 18,520,354 | 18,700,986  | 0 | 0 | 0 | 0 |
| Case 47 | 18 | 18,726,212 | 18,764,639  | 1 | 1 | 2 | 0 |
| Case 47 | 18 | 18,774,267 | 19,461,917  | 1 | 0 | 1 | 0 |
| Case 47 | 18 | 19,475,555 | 28,015,411  | 2 | 0 | 2 | 1 |
| Case 47 | 18 | 28,016,721 | 28,138,872  | 1 | 0 | 1 | 0 |
| Case 47 | 18 | 28,140,333 | 29,326,919  | 2 | 0 | 2 | 1 |
| Case 47 | 18 | 29,330,214 | 29,533,282  | 1 | 0 | 1 | 0 |
| Case 47 | 18 | 29,534,459 | 30,517,995  | 2 | 0 | 2 | 1 |
| Case 47 | 18 | 30,528,021 | 31,040,099  | 1 | 0 | 1 | 0 |
| Case 47 | 18 | 31,041,868 | 40,377,844  | 2 | 0 | 2 | 1 |
| Case 47 | 18 | 40,385,804 | 40,631,975  | 1 | 0 | 1 | 0 |
| Case 47 | 18 | 40,636,533 | 43,505,720  | 2 | 0 | 2 | 1 |
| Case 47 | 18 | 43,508,800 | 43,675,046  | 1 | 0 | 1 | 0 |
| Case 47 | 18 | 43,675,064 | 48,476,450  | 2 | 0 | 2 | 1 |
| Case 47 | 18 | 48,485,967 | 51,578,568  | 0 | 0 | 0 | 0 |
| Case 47 | 18 | 51,584,229 | 55,269,699  | 2 | 0 | 2 | 1 |
| Case 47 | 18 | 55,270,423 | 55,362,532  | 1 | 0 | 1 | 0 |
| Case 47 | 18 | 55,364,830 | 59,728,583  | 2 | 0 | 2 | 1 |
| Case 47 | 18 | 59,731,955 | 59,974,497  | 1 | 0 | 1 | 0 |
| Case 47 | 18 | 59,984,822 | 64,734,174  | 2 | 0 | 2 | 1 |
| Case 47 | 18 | 64,741,828 | 64,844,503  | 0 | 0 | 0 | 0 |
| Case 47 | 18 | 64,849,002 | 75,954,881  | 2 | 0 | 2 | 1 |
| Case 47 | 18 | 75,959,126 | 76,030,181  | 1 | 0 | 1 | 0 |
| Case 47 | 18 | 76,031,820 | 76,765,905  | 2 | 0 | 2 | 1 |
| Case 47 | 18 | 76,769,285 | 77,122,830  | 1 | 0 | 1 | 0 |
| Case 47 | 18 | 77,129,563 | 78,015,180  | 2 | 0 | 2 | 1 |
| Case 47 | 19 | 260,912    | 9,380,978   | 1 | 1 | 2 | 0 |
| Case 47 | 19 | 9,395,584  | 9,453,311   | 1 | 0 | 1 | 0 |
| Case 47 | 19 | 9,453,385  | 9,868,152   | 1 | 1 | 2 | 0 |

|         |    |            |            |   |   |   |   |
|---------|----|------------|------------|---|---|---|---|
| Case 47 | 19 | 9,868,213  | 9,872,907  | 1 | 0 | 1 | 0 |
| Case 47 | 19 | 9,873,963  | 11,879,420 | 1 | 1 | 2 | 0 |
| Case 47 | 19 | 11,881,346 | 12,699,777 | 1 | 0 | 1 | 0 |
| Case 47 | 19 | 12,718,619 | 19,819,843 | 1 | 1 | 2 | 0 |
| Case 47 | 19 | 19,822,049 | 19,823,567 | 0 | 0 | 0 | 0 |
| Case 47 | 19 | 19,823,593 | 21,451,565 | 1 | 1 | 2 | 0 |
| Case 47 | 19 | 21,455,154 | 21,720,803 | 1 | 0 | 1 | 0 |
| Case 47 | 19 | 21,740,058 | 21,989,391 | 1 | 1 | 2 | 0 |
| Case 47 | 19 | 21,990,464 | 21,992,578 | 0 | 0 | 0 | 0 |
| Case 47 | 19 | 21,996,666 | 23,814,365 | 1 | 1 | 2 | 0 |
| Case 47 | 19 | 23,829,737 | 23,930,879 | 0 | 0 | 0 | 0 |
| Case 47 | 19 | 23,937,693 | 24,629,285 | 1 | 1 | 2 | 0 |
| Case 47 | 19 | 27,732,159 | 27,828,664 | 1 | 1 | 2 | 0 |
| Case 47 | 19 | 27,862,694 | 31,453,053 | 3 | 1 | 4 | 0 |
| Case 47 | 19 | 31,456,406 | 31,784,595 | 3 | 0 | 3 | 1 |
| Case 47 | 19 | 31,790,322 | 33,307,117 | 3 | 1 | 4 | 0 |
| Case 47 | 19 | 33,309,030 | 33,655,144 | 3 | 0 | 3 | 1 |
| Case 47 | 19 | 33,655,154 | 34,552,127 | 3 | 1 | 4 | 0 |
| Case 47 | 19 | 34,552,893 | 34,957,365 | 3 | 0 | 3 | 1 |
| Case 47 | 19 | 34,958,841 | 35,014,298 | 3 | 1 | 4 | 0 |
| Case 47 | 19 | 35,026,796 | 35,979,464 | 3 | 0 | 3 | 1 |
| Case 47 | 19 | 35,979,745 | 36,443,999 | 2 | 1 | 3 | 0 |
| Case 47 | 19 | 36,459,236 | 36,674,347 | 3 | 1 | 4 | 0 |
| Case 47 | 19 | 36,674,390 | 40,225,045 | 3 | 0 | 3 | 1 |
| Case 47 | 19 | 40,225,646 | 40,316,422 | 3 | 1 | 4 | 0 |
| Case 47 | 19 | 40,316,461 | 41,096,310 | 3 | 0 | 3 | 1 |
| Case 47 | 19 | 41,096,696 | 41,168,196 | 3 | 1 | 4 | 0 |
| Case 47 | 19 | 41,171,757 | 41,239,223 | 3 | 0 | 3 | 1 |
| Case 47 | 19 | 41,239,241 | 41,314,720 | 3 | 1 | 4 | 0 |
| Case 47 | 19 | 41,318,306 | 41,932,596 | 3 | 0 | 3 | 1 |
| Case 47 | 19 | 41,932,602 | 42,125,713 | 3 | 1 | 4 | 0 |
| Case 47 | 19 | 42,128,097 | 44,172,025 | 3 | 0 | 3 | 1 |
| Case 47 | 19 | 44,172,188 | 44,342,977 | 3 | 1 | 4 | 0 |
| Case 47 | 19 | 44,348,824 | 44,793,236 | 3 | 0 | 3 | 1 |
| Case 47 | 19 | 44,793,278 | 44,867,601 | 3 | 1 | 4 | 0 |
| Case 47 | 19 | 44,871,027 | 45,017,301 | 3 | 0 | 3 | 1 |
| Case 47 | 19 | 45,019,507 | 45,316,553 | 3 | 1 | 4 | 0 |
| Case 47 | 19 | 45,316,588 | 46,181,392 | 3 | 0 | 3 | 1 |
| Case 47 | 19 | 46,181,466 | 46,289,503 | 3 | 1 | 4 | 0 |
| Case 47 | 19 | 46,289,799 | 46,621,464 | 3 | 0 | 3 | 1 |
| Case 47 | 19 | 46,622,776 | 46,627,412 | 0 | 0 | 0 | 0 |
| Case 47 | 19 | 46,636,139 | 47,051,159 | 3 | 0 | 3 | 1 |
| Case 47 | 19 | 47,058,986 | 47,244,530 | 3 | 1 | 4 | 0 |
| Case 47 | 19 | 47,245,378 | 47,865,819 | 3 | 0 | 3 | 1 |
| Case 47 | 19 | 47,865,889 | 48,286,163 | 3 | 1 | 4 | 0 |
| Case 47 | 19 | 48,289,303 | 48,510,839 | 3 | 0 | 3 | 1 |
| Case 47 | 19 | 48,511,888 | 48,619,130 | 2 | 1 | 3 | 0 |
| Case 47 | 19 | 48,619,154 | 48,653,093 | 3 | 0 | 3 | 1 |
| Case 47 | 19 | 48,654,553 | 48,746,681 | 3 | 1 | 4 | 0 |
| Case 47 | 19 | 48,749,584 | 49,183,284 | 3 | 0 | 3 | 1 |
| Case 47 | 19 | 49,184,380 | 49,206,462 | 0 | 0 | 0 | 0 |
| Case 47 | 19 | 49,206,631 | 50,086,907 | 3 | 0 | 3 | 1 |
| Case 47 | 19 | 50,086,918 | 50,556,588 | 2 | 1 | 3 | 0 |
| Case 47 | 19 | 50,557,876 | 51,870,712 | 3 | 0 | 3 | 1 |
| Case 47 | 19 | 51,871,157 | 52,051,758 | 2 | 1 | 3 | 0 |
| Case 47 | 19 | 52,053,130 | 52,130,337 | 3 | 0 | 3 | 1 |
| Case 47 | 19 | 52,130,438 | 52,130,459 | 2 | 1 | 3 | 0 |
| Case 47 | 19 | 52,130,488 | 52,249,120 | 3 | 1 | 4 | 0 |
| Case 47 | 19 | 52,249,211 | 52,272,651 | 3 | 0 | 3 | 1 |
| Case 47 | 19 | 52,272,840 | 52,375,239 | 3 | 1 | 4 | 0 |
| Case 47 | 19 | 52,375,299 | 53,793,596 | 3 | 0 | 3 | 1 |

|         |    |             |             |   |   |   |   |
|---------|----|-------------|-------------|---|---|---|---|
| Case 47 | 19 | 53,798,945  | 53,958,166  | 3 | 1 | 4 | 0 |
| Case 47 | 19 | 53,958,347  | 54,114,151  | 3 | 0 | 3 | 1 |
| Case 47 | 19 | 54,116,508  | 54,276,283  | 3 | 1 | 4 | 0 |
| Case 47 | 19 | 54,281,322  | 54,971,229  | 3 | 0 | 3 | 1 |
| Case 47 | 19 | 54,973,198  | 55,087,468  | 3 | 1 | 4 | 0 |
| Case 47 | 19 | 55,088,977  | 55,663,250  | 3 | 0 | 3 | 1 |
| Case 47 | 19 | 55,665,410  | 56,477,710  | 2 | 1 | 3 | 0 |
| Case 47 | 19 | 56,477,731  | 56,609,371  | 3 | 0 | 3 | 1 |
| Case 47 | 19 | 56,620,260  | 56,689,214  | 3 | 1 | 4 | 0 |
| Case 47 | 19 | 56,689,969  | 56,798,230  | 3 | 0 | 3 | 1 |
| Case 47 | 19 | 56,799,304  | 56,900,486  | 3 | 1 | 4 | 0 |
| Case 47 | 19 | 56,901,457  | 58,494,665  | 3 | 0 | 3 | 1 |
| Case 47 | 19 | 58,495,059  | 58,549,301  | 3 | 1 | 4 | 0 |
| Case 47 | 19 | 58,549,337  | 58,596,165  | 3 | 0 | 3 | 1 |
| Case 47 | 19 | 58,596,338  | 58,689,834  | 3 | 1 | 4 | 0 |
| Case 47 | 19 | 58,693,418  | 58,815,853  | 3 | 0 | 3 | 1 |
| Case 47 | 19 | 58,819,113  | 59,097,160  | 3 | 1 | 4 | 0 |
| Case 47 | 20 | 63,244      | 26,293,985  | 2 | 1 | 3 | 0 |
| Case 47 | 20 | 29,425,357  | 62,948,788  | 2 | 1 | 3 | 0 |
| Case 47 | 21 | 10,827,533  | 10,971,337  | 1 | 1 | 2 | 0 |
| Case 47 | 21 | 14,368,320  | 48,100,155  | 1 | 1 | 2 | 0 |
| Case 47 | 22 | 16,114,244  | 51,195,728  | 1 | 1 | 2 | 0 |
| Case 49 | 1  | 82,154      | 12,880,356  | 1 | 1 | 2 | 0 |
| Case 49 | 1  | 12,907,689  | 12,919,891  | 2 | 2 | 4 | 0 |
| Case 49 | 1  | 12,920,053  | 35,454,473  | 1 | 1 | 2 | 0 |
| Case 49 | 1  | 35,454,498  | 35,882,659  | 1 | 0 | 1 | 0 |
| Case 49 | 1  | 35,884,083  | 92,977,275  | 1 | 1 | 2 | 0 |
| Case 49 | 1  | 92,979,254  | 93,795,932  | 1 | 0 | 1 | 0 |
| Case 49 | 1  | 93,810,900  | 121,346,616 | 1 | 1 | 2 | 0 |
| Case 49 | 1  | 142,649,718 | 178,269,244 | 1 | 1 | 2 | 0 |
| Case 49 | 1  | 178,296,326 | 178,657,038 | 1 | 0 | 1 | 0 |
| Case 49 | 1  | 178,657,616 | 200,534,255 | 1 | 1 | 2 | 0 |
| Case 49 | 1  | 200,534,651 | 200,539,111 | 0 | 0 | 0 | 0 |
| Case 49 | 1  | 200,545,187 | 236,378,916 | 1 | 1 | 2 | 0 |
| Case 49 | 1  | 236,379,623 | 236,384,402 | 0 | 0 | 0 | 0 |
| Case 49 | 1  | 236,385,276 | 249,150,486 | 1 | 1 | 2 | 0 |
| Case 49 | 1  | 249,150,577 | 249,218,992 | 2 | 1 | 3 | 0 |
| Case 49 | 2  | 18,674      | 61,456,089  | 1 | 1 | 2 | 0 |
| Case 49 | 2  | 61,461,412  | 61,763,647  | 1 | 0 | 1 | 0 |
| Case 49 | 2  | 61,772,257  | 79,326,215  | 1 | 1 | 2 | 0 |
| Case 49 | 2  | 79,332,083  | 79,338,929  | 5 | 0 | 5 | 1 |
| Case 49 | 2  | 79,345,504  | 89,427,986  | 1 | 1 | 2 | 0 |
| Case 49 | 2  | 89,452,968  | 92,027,973  | 0 | 0 | 0 | 0 |
| Case 49 | 2  | 92,035,041  | 92,081,640  | 1 | 1 | 2 | 0 |
| Case 49 | 2  | 95,429,424  | 203,426,668 | 1 | 1 | 2 | 0 |
| Case 49 | 2  | 203,430,456 | 204,161,510 | 1 | 0 | 1 | 0 |
| Case 49 | 2  | 204,165,171 | 243,048,760 | 1 | 1 | 2 | 0 |
| Case 49 | 3  | 61,495      | 90,442,925  | 1 | 1 | 2 | 0 |
| Case 49 | 3  | 93,537,290  | 197,838,262 | 1 | 1 | 2 | 0 |
| Case 49 | 4  | 71,566      | 49,620,898  | 1 | 1 | 2 | 0 |
| Case 49 | 4  | 52,697,856  | 128,813,668 | 1 | 1 | 2 | 0 |
| Case 49 | 4  | 128,814,675 | 129,127,647 | 1 | 0 | 1 | 0 |
| Case 49 | 4  | 129,131,153 | 144,950,193 | 1 | 1 | 2 | 0 |
| Case 49 | 4  | 144,965,891 | 145,035,868 | 5 | 0 | 5 | 1 |
| Case 49 | 4  | 145,040,841 | 190,963,766 | 1 | 1 | 2 | 0 |
| Case 49 | 5  | 38,139      | 174,106     | 2 | 1 | 3 | 0 |
| Case 49 | 5  | 174,171     | 46,128,475  | 1 | 1 | 2 | 0 |
| Case 49 | 5  | 46,138,457  | 46,399,093  | 0 | 0 | 0 | 0 |
| Case 49 | 5  | 49,457,282  | 49,586,870  | 0 | 0 | 0 | 0 |
| Case 49 | 5  | 49,597,497  | 113,622,824 | 1 | 1 | 2 | 0 |
| Case 49 | 5  | 113,623,738 | 113,783,989 | 2 | 1 | 3 | 0 |

|         |    |             |             |   |   |   |   |
|---------|----|-------------|-------------|---|---|---|---|
| Case 49 | 5  | 113,785,673 | 139,930,726 | 1 | 1 | 2 | 0 |
| Case 49 | 5  | 139,930,736 | 139,931,661 | 0 | 0 | 0 | 0 |
| Case 49 | 5  | 139,931,691 | 180,693,127 | 1 | 1 | 2 | 0 |
| Case 49 | 6  | 108,666     | 29,835,632  | 1 | 1 | 2 | 0 |
| Case 49 | 6  | 29,835,834  | 29,926,082  | 2 | 1 | 3 | 0 |
| Case 49 | 6  | 29,926,377  | 32,670,464  | 1 | 1 | 2 | 0 |
| Case 49 | 6  | 32,670,576  | 32,683,691  | 1 | 0 | 1 | 0 |
| Case 49 | 6  | 32,683,898  | 33,032,290  | 1 | 1 | 2 | 0 |
| Case 49 | 6  | 33,032,975  | 33,051,910  | 2 | 1 | 3 | 0 |
| Case 49 | 6  | 33,052,736  | 58,752,089  | 1 | 1 | 2 | 0 |
| Case 49 | 6  | 61,891,118  | 88,240,570  | 1 | 1 | 2 | 0 |
| Case 49 | 6  | 88,241,110  | 88,366,708  | 1 | 0 | 1 | 0 |
| Case 49 | 6  | 88,367,635  | 170,980,171 | 1 | 1 | 2 | 0 |
| Case 49 | 7  | 44,935      | 58,019,061  | 2 | 1 | 3 | 0 |
| Case 49 | 7  | 61,056,053  | 74,000,679  | 2 | 1 | 3 | 0 |
| Case 49 | 7  | 74,004,204  | 75,255,633  | 1 | 1 | 2 | 0 |
| Case 49 | 7  | 75,263,792  | 100,548,261 | 2 | 1 | 3 | 0 |
| Case 49 | 7  | 100,548,273 | 100,732,805 | 1 | 1 | 2 | 0 |
| Case 49 | 7  | 100,732,844 | 110,519,790 | 2 | 1 | 3 | 0 |
| Case 49 | 7  | 110,526,714 | 111,228,173 | 1 | 1 | 2 | 0 |
| Case 49 | 7  | 111,228,448 | 120,577,688 | 2 | 1 | 3 | 0 |
| Case 49 | 7  | 120,579,637 | 159,119,486 | 1 | 1 | 2 | 0 |
| Case 49 | 8  | 164,984     | 43,791,691  | 1 | 1 | 2 | 0 |
| Case 49 | 8  | 46,886,735  | 51,210,717  | 1 | 1 | 2 | 0 |
| Case 49 | 8  | 51,213,802  | 51,227,777  | 0 | 0 | 0 | 0 |
| Case 49 | 8  | 51,230,812  | 85,183,072  | 1 | 1 | 2 | 0 |
| Case 49 | 8  | 85,185,158  | 146,293,414 | 2 | 1 | 3 | 0 |
| Case 49 | 9  | 46,587      | 39,004,140  | 1 | 1 | 2 | 0 |
| Case 49 | 9  | 39,076,028  | 46,944,322  | 1 | 0 | 1 | 0 |
| Case 49 | 9  | 65,629,772  | 69,238,239  | 1 | 0 | 1 | 0 |
| Case 49 | 9  | 69,355,037  | 141,066,491 | 1 | 1 | 2 | 0 |
| Case 49 | 10 | 98,087      | 3,147,192   | 1 | 1 | 2 | 0 |
| Case 49 | 10 | 3,148,116   | 3,190,211   | 1 | 0 | 1 | 0 |
| Case 49 | 10 | 3,190,380   | 39,097,912  | 1 | 1 | 2 | 0 |
| Case 49 | 10 | 42,436,301  | 70,084,273  | 1 | 1 | 2 | 0 |
| Case 49 | 10 | 70,085,529  | 70,319,626  | 1 | 0 | 1 | 0 |
| Case 49 | 10 | 70,324,814  | 135,477,883 | 1 | 1 | 2 | 0 |
| Case 49 | 11 | 193,146     | 51,591,253  | 1 | 1 | 2 | 0 |
| Case 49 | 11 | 54,794,237  | 108,117,798 | 1 | 1 | 2 | 0 |
| Case 49 | 11 | 108,117,799 | 108,190,770 | 1 | 0 | 1 | 0 |
| Case 49 | 11 | 108,192,078 | 134,934,063 | 1 | 1 | 2 | 0 |
| Case 49 | 12 | 191,619     | 1,040,391   | 1 | 1 | 2 | 0 |
| Case 49 | 12 | 1,040,397   | 1,510,533   | 1 | 0 | 1 | 0 |
| Case 49 | 12 | 1,510,640   | 34,285,581  | 1 | 1 | 2 | 0 |
| Case 49 | 12 | 34,294,699  | 34,853,011  | 1 | 0 | 1 | 0 |
| Case 49 | 12 | 37,876,400  | 38,514,872  | 1 | 0 | 1 | 0 |
| Case 49 | 12 | 38,528,487  | 95,690,029  | 1 | 1 | 2 | 0 |
| Case 49 | 12 | 95,694,111  | 95,705,532  | 5 | 0 | 5 | 1 |
| Case 49 | 12 | 95,715,994  | 133,810,935 | 1 | 1 | 2 | 0 |
| Case 49 | 13 | 19,058,717  | 21,729,226  | 1 | 1 | 2 | 0 |
| Case 49 | 13 | 21,729,267  | 21,746,637  | 5 | 1 | 6 | 0 |
| Case 49 | 13 | 21,747,051  | 114,941,946 | 1 | 1 | 2 | 0 |
| Case 49 | 13 | 114,946,692 | 115,103,529 | 2 | 1 | 3 | 0 |
| Case 49 | 14 | 19,280,733  | 20,420,338  | 3 | 1 | 4 | 0 |
| Case 49 | 14 | 20,425,051  | 35,449,467  | 1 | 1 | 2 | 0 |
| Case 49 | 14 | 35,452,132  | 35,649,943  | 1 | 0 | 1 | 0 |
| Case 49 | 14 | 35,661,048  | 45,606,287  | 1 | 1 | 2 | 0 |
| Case 49 | 14 | 45,606,290  | 45,683,554  | 1 | 0 | 1 | 0 |
| Case 49 | 14 | 45,686,268  | 105,409,343 | 1 | 1 | 2 | 0 |
| Case 49 | 14 | 105,410,183 | 105,412,270 | 5 | 0 | 5 | 1 |
| Case 49 | 14 | 105,413,249 | 107,287,663 | 1 | 1 | 2 | 0 |

|         |    |            |             |   |   |   |   |
|---------|----|------------|-------------|---|---|---|---|
| Case 49 | 15 | 20,034,919 | 41,341,500  | 1 | 1 | 2 | 0 |
| Case 49 | 15 | 41,341,524 | 41,699,528  | 1 | 0 | 1 | 0 |
| Case 49 | 15 | 41,701,857 | 79,509,682  | 1 | 1 | 2 | 0 |
| Case 49 | 15 | 79,510,909 | 79,616,077  | 2 | 1 | 3 | 0 |
| Case 49 | 15 | 79,617,221 | 98,347,727  | 1 | 1 | 2 | 0 |
| Case 49 | 15 | 98,348,809 | 98,615,560  | 2 | 1 | 3 | 0 |
| Case 49 | 15 | 98,617,199 | 102,461,162 | 1 | 1 | 2 | 0 |
| Case 49 | 16 | 88,165     | 180,719     | 2 | 1 | 3 | 0 |
| Case 49 | 16 | 185,123    | 35,285,582  | 1 | 1 | 2 | 0 |
| Case 49 | 16 | 46,450,037 | 78,718,027  | 1 | 1 | 2 | 0 |
| Case 49 | 16 | 78,719,199 | 78,927,243  | 1 | 0 | 1 | 0 |
| Case 49 | 16 | 78,927,732 | 84,028,088  | 1 | 1 | 2 | 0 |
| Case 49 | 16 | 84,028,123 | 84,032,023  | 2 | 1 | 3 | 0 |
| Case 49 | 16 | 84,034,351 | 90,027,838  | 1 | 1 | 2 | 0 |
| Case 49 | 16 | 90,028,480 | 90,274,695  | 2 | 1 | 3 | 0 |
| Case 49 | 17 | 11,885     | 1,030,988   | 1 | 1 | 2 | 0 |
| Case 49 | 17 | 1,037,132  | 1,068,393   | 0 | 0 | 0 | 0 |
| Case 49 | 17 | 1,071,624  | 15,039,528  | 1 | 1 | 2 | 0 |
| Case 49 | 17 | 15,044,804 | 15,058,991  | 0 | 0 | 0 | 0 |
| Case 49 | 17 | 15,060,561 | 22,242,355  | 1 | 1 | 2 | 0 |
| Case 49 | 17 | 25,268,142 | 28,104,306  | 1 | 1 | 2 | 0 |
| Case 49 | 17 | 28,120,918 | 28,405,334  | 1 | 0 | 1 | 0 |
| Case 49 | 17 | 28,405,349 | 29,000,019  | 1 | 1 | 2 | 0 |
| Case 49 | 17 | 29,015,932 | 29,205,072  | 1 | 0 | 1 | 0 |
| Case 49 | 17 | 29,213,943 | 34,443,811  | 1 | 1 | 2 | 0 |
| Case 49 | 17 | 34,445,325 | 34,465,375  | 5 | 0 | 5 | 1 |
| Case 49 | 17 | 34,466,631 | 80,904,844  | 1 | 1 | 2 | 0 |
| Case 49 | 17 | 80,905,299 | 81,060,040  | 2 | 1 | 3 | 0 |
| Case 49 | 18 | 87,505     | 563,815     | 1 | 1 | 2 | 0 |
| Case 49 | 18 | 565,760    | 632,651     | 1 | 0 | 1 | 0 |
| Case 49 | 18 | 633,346    | 15,375,878  | 1 | 1 | 2 | 0 |
| Case 49 | 18 | 18,520,354 | 71,516,958  | 1 | 1 | 2 | 0 |
| Case 49 | 18 | 71,517,388 | 71,551,663  | 2 | 1 | 3 | 0 |
| Case 49 | 18 | 71,555,222 | 77,915,906  | 1 | 1 | 2 | 0 |
| Case 49 | 18 | 77,916,015 | 78,015,180  | 2 | 1 | 3 | 0 |
| Case 49 | 19 | 260,912    | 9,377,716   | 1 | 1 | 2 | 0 |
| Case 49 | 19 | 9,380,978  | 9,886,283   | 1 | 0 | 1 | 0 |
| Case 49 | 19 | 9,912,917  | 11,873,382  | 1 | 1 | 2 | 0 |
| Case 49 | 19 | 11,878,095 | 12,692,130  | 1 | 0 | 1 | 0 |
| Case 49 | 19 | 12,692,328 | 19,772,856  | 1 | 1 | 2 | 0 |
| Case 49 | 19 | 19,776,814 | 19,849,697  | 1 | 0 | 1 | 0 |
| Case 49 | 19 | 19,849,713 | 19,870,381  | 1 | 1 | 2 | 0 |
| Case 49 | 19 | 19,873,269 | 20,046,102  | 1 | 0 | 1 | 0 |
| Case 49 | 19 | 20,054,823 | 20,925,934  | 1 | 1 | 2 | 0 |
| Case 49 | 19 | 20,942,429 | 22,031,822  | 1 | 0 | 1 | 0 |
| Case 49 | 19 | 22,034,819 | 24,354,312  | 1 | 1 | 2 | 0 |
| Case 49 | 19 | 24,354,633 | 24,629,285  | 1 | 0 | 1 | 0 |
| Case 49 | 19 | 27,732,159 | 28,095,812  | 1 | 0 | 1 | 0 |
| Case 49 | 19 | 28,101,122 | 37,487,723  | 1 | 1 | 2 | 0 |
| Case 49 | 19 | 37,487,860 | 37,823,811  | 1 | 0 | 1 | 0 |
| Case 49 | 19 | 37,835,658 | 52,941,827  | 1 | 1 | 2 | 0 |
| Case 49 | 19 | 52,941,847 | 53,117,549  | 1 | 0 | 1 | 0 |
| Case 49 | 19 | 53,117,609 | 53,269,486  | 1 | 1 | 2 | 0 |
| Case 49 | 19 | 53,269,678 | 53,669,447  | 1 | 0 | 1 | 0 |
| Case 49 | 19 | 53,669,472 | 53,911,580  | 1 | 1 | 2 | 0 |
| Case 49 | 19 | 53,911,592 | 53,997,114  | 1 | 0 | 1 | 0 |
| Case 49 | 19 | 54,010,277 | 58,983,457  | 1 | 1 | 2 | 0 |
| Case 49 | 19 | 58,983,493 | 59,097,160  | 2 | 1 | 3 | 0 |
| Case 49 | 20 | 63,244     | 26,293,985  | 2 | 1 | 3 | 0 |
| Case 49 | 20 | 29,425,357 | 33,891,824  | 2 | 1 | 3 | 0 |
| Case 49 | 20 | 33,894,463 | 34,242,737  | 1 | 1 | 2 | 0 |

|         |    |             |             |   |   |   |   |
|---------|----|-------------|-------------|---|---|---|---|
| Case 49 | 20 | 34,242,782  | 47,591,082  | 2 | 1 | 3 | 0 |
| Case 49 | 20 | 47,592,600  | 47,989,624  | 1 | 1 | 2 | 0 |
| Case 49 | 20 | 47,990,100  | 52,164,278  | 2 | 1 | 3 | 0 |
| Case 49 | 20 | 52,166,279  | 52,240,212  | 1 | 1 | 2 | 0 |
| Case 49 | 20 | 52,246,606  | 62,948,788  | 2 | 1 | 3 | 0 |
| Case 49 | 21 | 10,827,533  | 10,971,337  | 1 | 1 | 2 | 0 |
| Case 49 | 21 | 14,368,320  | 17,768,524  | 1 | 1 | 2 | 0 |
| Case 49 | 21 | 17,772,222  | 17,775,303  | 0 | 0 | 0 | 0 |
| Case 49 | 21 | 17,777,827  | 48,100,155  | 1 | 1 | 2 | 0 |
| Case 49 | 22 | 16,114,244  | 51,195,728  | 1 | 1 | 2 | 0 |
| Case 50 | 1  | 82,154      | 1,619,541   | 3 | 0 | 3 | 1 |
| Case 50 | 1  | 1,627,987   | 1,664,019   | 0 | 0 | 0 | 0 |
| Case 50 | 1  | 1,664,124   | 71,960,291  | 3 | 0 | 3 | 1 |
| Case 50 | 1  | 71,961,608  | 72,299,344  | 2 | 0 | 2 | 1 |
| Case 50 | 1  | 72,309,009  | 72,480,008  | 0 | 0 | 0 | 0 |
| Case 50 | 1  | 72,488,815  | 72,535,536  | 2 | 0 | 2 | 1 |
| Case 50 | 1  | 72,549,836  | 102,647,938 | 3 | 0 | 3 | 1 |
| Case 50 | 1  | 102,649,588 | 102,828,823 | 1 | 0 | 1 | 0 |
| Case 50 | 1  | 102,836,753 | 103,231,028 | 2 | 0 | 2 | 1 |
| Case 50 | 1  | 103,233,203 | 103,379,918 | 1 | 0 | 1 | 0 |
| Case 50 | 1  | 103,381,192 | 103,432,657 | 2 | 0 | 2 | 1 |
| Case 50 | 1  | 103,438,795 | 103,548,497 | 1 | 0 | 1 | 0 |
| Case 50 | 1  | 103,548,505 | 103,670,518 | 2 | 0 | 2 | 1 |
| Case 50 | 1  | 103,671,410 | 104,096,692 | 1 | 0 | 1 | 0 |
| Case 50 | 1  | 104,103,057 | 104,297,239 | 2 | 0 | 2 | 1 |
| Case 50 | 1  | 104,309,132 | 104,418,619 | 1 | 0 | 1 | 0 |
| Case 50 | 1  | 104,436,329 | 104,892,901 | 2 | 0 | 2 | 1 |
| Case 50 | 1  | 104,893,789 | 104,974,603 | 1 | 0 | 1 | 0 |
| Case 50 | 1  | 104,975,728 | 105,995,890 | 2 | 0 | 2 | 1 |
| Case 50 | 1  | 105,998,384 | 106,215,029 | 1 | 0 | 1 | 0 |
| Case 50 | 1  | 106,221,029 | 106,849,846 | 2 | 0 | 2 | 1 |
| Case 50 | 1  | 106,860,057 | 106,988,405 | 1 | 0 | 1 | 0 |
| Case 50 | 1  | 106,994,923 | 109,538,263 | 2 | 0 | 2 | 1 |
| Case 50 | 1  | 109,549,512 | 109,608,833 | 1 | 0 | 1 | 0 |
| Case 50 | 1  | 109,610,537 | 111,575,921 | 2 | 0 | 2 | 1 |
| Case 50 | 1  | 111,585,494 | 111,667,381 | 1 | 0 | 1 | 0 |
| Case 50 | 1  | 111,671,707 | 113,123,734 | 2 | 0 | 2 | 1 |
| Case 50 | 1  | 113,125,080 | 113,143,441 | 1 | 0 | 1 | 0 |
| Case 50 | 1  | 113,153,580 | 114,365,752 | 2 | 0 | 2 | 1 |
| Case 50 | 1  | 114,366,434 | 114,391,219 | 1 | 0 | 1 | 0 |
| Case 50 | 1  | 114,394,463 | 114,906,992 | 2 | 0 | 2 | 1 |
| Case 50 | 1  | 114,920,097 | 114,989,211 | 1 | 0 | 1 | 0 |
| Case 50 | 1  | 114,996,112 | 115,280,587 | 2 | 0 | 2 | 1 |
| Case 50 | 1  | 115,283,197 | 115,316,921 | 1 | 0 | 1 | 0 |
| Case 50 | 1  | 115,323,219 | 115,470,852 | 2 | 0 | 2 | 1 |
| Case 50 | 1  | 115,487,521 | 115,575,715 | 1 | 0 | 1 | 0 |
| Case 50 | 1  | 115,576,023 | 121,346,616 | 2 | 0 | 2 | 1 |
| Case 50 | 1  | 142,649,718 | 146,588,939 | 2 | 2 | 4 | 0 |
| Case 50 | 1  | 146,589,758 | 147,208,401 | 3 | 2 | 5 | 0 |
| Case 50 | 1  | 147,210,110 | 150,658,287 | 2 | 2 | 4 | 0 |
| Case 50 | 1  | 150,658,971 | 150,857,555 | 3 | 2 | 5 | 0 |
| Case 50 | 1  | 150,857,664 | 151,770,138 | 2 | 2 | 4 | 0 |
| Case 50 | 1  | 151,773,160 | 152,056,368 | 3 | 2 | 5 | 0 |
| Case 50 | 1  | 152,057,472 | 157,666,939 | 2 | 2 | 4 | 0 |
| Case 50 | 1  | 157,667,083 | 157,763,970 | 3 | 2 | 5 | 0 |
| Case 50 | 1  | 157,765,901 | 158,875,409 | 2 | 2 | 4 | 0 |
| Case 50 | 1  | 158,876,921 | 159,131,926 | 3 | 2 | 5 | 0 |
| Case 50 | 1  | 159,132,649 | 159,215,287 | 2 | 2 | 4 | 0 |
| Case 50 | 1  | 159,217,581 | 159,746,857 | 3 | 2 | 5 | 0 |
| Case 50 | 1  | 159,748,269 | 161,479,745 | 2 | 2 | 4 | 0 |
| Case 50 | 1  | 161,492,587 | 161,953,015 | 3 | 2 | 5 | 0 |

|         |   |             |             |   |   |   |   |
|---------|---|-------------|-------------|---|---|---|---|
| Case 50 | 1 | 161,953,624 | 162,198,542 | 2 | 2 | 4 | 0 |
| Case 50 | 1 | 162,201,217 | 165,440,194 | 3 | 2 | 5 | 0 |
| Case 50 | 1 | 165,448,157 | 166,369,651 | 2 | 2 | 4 | 0 |
| Case 50 | 1 | 166,388,391 | 167,022,701 | 3 | 2 | 5 | 0 |
| Case 50 | 1 | 167,023,590 | 167,496,303 | 2 | 2 | 4 | 0 |
| Case 50 | 1 | 167,497,574 | 171,506,696 | 3 | 2 | 5 | 0 |
| Case 50 | 1 | 171,509,014 | 171,761,155 | 2 | 2 | 4 | 0 |
| Case 50 | 1 | 171,763,549 | 174,821,623 | 3 | 2 | 5 | 0 |
| Case 50 | 1 | 174,829,296 | 177,915,498 | 2 | 2 | 4 | 0 |
| Case 50 | 1 | 177,917,055 | 179,052,127 | 3 | 2 | 5 | 0 |
| Case 50 | 1 | 179,054,810 | 179,100,501 | 2 | 2 | 4 | 0 |
| Case 50 | 1 | 179,100,545 | 179,246,861 | 3 | 2 | 5 | 0 |
| Case 50 | 1 | 179,248,952 | 179,371,973 | 2 | 2 | 4 | 0 |
| Case 50 | 1 | 179,396,444 | 180,915,596 | 3 | 2 | 5 | 0 |
| Case 50 | 1 | 180,916,130 | 181,173,577 | 2 | 2 | 4 | 0 |
| Case 50 | 1 | 181,174,959 | 181,545,124 | 3 | 2 | 5 | 0 |
| Case 50 | 1 | 181,549,547 | 181,768,985 | 2 | 2 | 4 | 0 |
| Case 50 | 1 | 181,771,992 | 182,922,975 | 3 | 2 | 5 | 0 |
| Case 50 | 1 | 182,931,205 | 183,116,686 | 2 | 2 | 4 | 0 |
| Case 50 | 1 | 183,121,028 | 183,854,023 | 3 | 2 | 5 | 0 |
| Case 50 | 1 | 183,854,067 | 183,920,208 | 2 | 2 | 4 | 0 |
| Case 50 | 1 | 183,922,435 | 200,880,817 | 3 | 2 | 5 | 0 |
| Case 50 | 1 | 200,881,595 | 205,661,614 | 2 | 2 | 4 | 0 |
| Case 50 | 1 | 205,662,718 | 205,779,560 | 3 | 2 | 5 | 0 |
| Case 50 | 1 | 205,785,932 | 207,039,923 | 2 | 2 | 4 | 0 |
| Case 50 | 1 | 207,040,730 | 207,578,194 | 3 | 2 | 5 | 0 |
| Case 50 | 1 | 207,578,284 | 207,651,374 | 2 | 2 | 4 | 0 |
| Case 50 | 1 | 207,651,395 | 208,186,905 | 3 | 2 | 5 | 0 |
| Case 50 | 1 | 208,188,196 | 211,112,257 | 2 | 2 | 4 | 0 |
| Case 50 | 1 | 211,120,598 | 211,663,632 | 3 | 2 | 5 | 0 |
| Case 50 | 1 | 211,663,679 | 211,821,673 | 2 | 2 | 4 | 0 |
| Case 50 | 1 | 211,824,797 | 212,360,082 | 3 | 2 | 5 | 0 |
| Case 50 | 1 | 212,370,745 | 213,146,944 | 2 | 2 | 4 | 0 |
| Case 50 | 1 | 213,146,952 | 214,436,619 | 3 | 2 | 5 | 0 |
| Case 50 | 1 | 214,437,315 | 214,682,931 | 2 | 2 | 4 | 0 |
| Case 50 | 1 | 214,683,833 | 220,867,903 | 3 | 2 | 5 | 0 |
| Case 50 | 1 | 220,868,627 | 221,107,796 | 2 | 2 | 4 | 0 |
| Case 50 | 1 | 221,111,780 | 223,003,498 | 3 | 2 | 5 | 0 |
| Case 50 | 1 | 223,004,049 | 223,339,689 | 2 | 2 | 4 | 0 |
| Case 50 | 1 | 223,353,343 | 223,627,024 | 3 | 2 | 5 | 0 |
| Case 50 | 1 | 223,629,454 | 223,958,547 | 2 | 2 | 4 | 0 |
| Case 50 | 1 | 223,959,543 | 224,492,479 | 3 | 2 | 5 | 0 |
| Case 50 | 1 | 224,492,744 | 225,007,842 | 2 | 2 | 4 | 0 |
| Case 50 | 1 | 225,008,581 | 225,949,423 | 3 | 2 | 5 | 0 |
| Case 50 | 1 | 225,955,919 | 227,192,752 | 2 | 2 | 4 | 0 |
| Case 50 | 1 | 227,195,758 | 227,450,144 | 3 | 2 | 5 | 0 |
| Case 50 | 1 | 227,452,224 | 229,331,680 | 2 | 2 | 4 | 0 |
| Case 50 | 1 | 229,334,294 | 229,635,480 | 3 | 2 | 5 | 0 |
| Case 50 | 1 | 229,635,484 | 229,861,486 | 2 | 2 | 4 | 0 |
| Case 50 | 1 | 229,863,007 | 230,138,554 | 3 | 2 | 5 | 0 |
| Case 50 | 1 | 230,139,418 | 230,780,571 | 2 | 2 | 4 | 0 |
| Case 50 | 1 | 230,781,741 | 230,879,952 | 3 | 2 | 5 | 0 |
| Case 50 | 1 | 230,880,155 | 231,060,736 | 2 | 2 | 4 | 0 |
| Case 50 | 1 | 231,061,277 | 231,255,113 | 3 | 2 | 5 | 0 |
| Case 50 | 1 | 231,260,770 | 231,485,731 | 2 | 2 | 4 | 0 |
| Case 50 | 1 | 231,487,993 | 231,829,578 | 3 | 2 | 5 | 0 |
| Case 50 | 1 | 231,829,616 | 232,148,135 | 2 | 2 | 4 | 0 |
| Case 50 | 1 | 232,149,520 | 233,749,021 | 3 | 2 | 5 | 0 |
| Case 50 | 1 | 233,750,008 | 234,274,658 | 2 | 2 | 4 | 0 |
| Case 50 | 1 | 234,276,395 | 234,873,046 | 3 | 2 | 5 | 0 |
| Case 50 | 1 | 234,873,275 | 235,764,497 | 2 | 2 | 4 | 0 |



|         |   |             |             |   |   |   |   |
|---------|---|-------------|-------------|---|---|---|---|
| Case 50 | 1 | 235,766,062 | 235,969,566 | 3 | 2 | 5 | 0 |
| Case 50 | 1 | 235,969,711 | 236,370,654 | 2 | 2 | 4 | 0 |
| Case 50 | 1 | 236,371,376 | 236,474,797 | 3 | 2 | 5 | 0 |
| Case 50 | 1 | 236,476,805 | 236,730,157 | 2 | 2 | 4 | 0 |
| Case 50 | 1 | 236,730,158 | 236,848,268 | 3 | 2 | 5 | 0 |
| Case 50 | 1 | 236,848,751 | 237,548,941 | 2 | 2 | 4 | 0 |
| Case 50 | 1 | 237,550,653 | 241,901,183 | 3 | 2 | 5 | 0 |
| Case 50 | 1 | 241,907,691 | 243,723,214 | 2 | 2 | 4 | 0 |
| Case 50 | 1 | 243,725,983 | 244,161,728 | 3 | 2 | 5 | 0 |
| Case 50 | 1 | 244,161,982 | 244,724,277 | 2 | 2 | 4 | 0 |
| Case 50 | 1 | 244,735,812 | 245,219,054 | 3 | 2 | 5 | 0 |
| Case 50 | 1 | 245,222,730 | 246,091,276 | 2 | 2 | 4 | 0 |
| Case 50 | 1 | 246,097,156 | 246,414,404 | 3 | 1 | 4 | 0 |
| Case 50 | 1 | 246,425,984 | 246,425,984 | 3 | 0 | 3 | 1 |
| Case 50 | 1 | 246,429,058 | 246,606,218 | 2 | 0 | 2 | 1 |
| Case 50 | 1 | 246,613,039 | 249,218,992 | 2 | 2 | 4 | 0 |
| Case 50 | 2 | 18,674      | 22,650,830  | 2 | 1 | 3 | 0 |
| Case 50 | 2 | 22,652,833  | 22,692,241  | 1 | 1 | 2 | 0 |
| Case 50 | 2 | 22,704,855  | 24,302,246  | 2 | 1 | 3 | 0 |
| Case 50 | 2 | 24,302,317  | 24,305,911  | 1 | 1 | 2 | 0 |
| Case 50 | 2 | 24,335,554  | 32,550,485  | 2 | 1 | 3 | 0 |
| Case 50 | 2 | 32,579,759  | 32,707,650  | 1 | 1 | 2 | 0 |
| Case 50 | 2 | 32,713,706  | 73,928,422  | 2 | 1 | 3 | 0 |
| Case 50 | 2 | 73,932,044  | 73,999,654  | 1 | 1 | 2 | 0 |
| Case 50 | 2 | 74,007,136  | 75,559,706  | 2 | 1 | 3 | 0 |
| Case 50 | 2 | 75,561,061  | 75,562,760  | 3 | 1 | 4 | 0 |
| Case 50 | 2 | 75,562,933  | 75,866,236  | 2 | 2 | 4 | 0 |
| Case 50 | 2 | 75,872,246  | 75,874,015  | 3 | 1 | 4 | 0 |
| Case 50 | 2 | 75,876,340  | 77,788,869  | 2 | 1 | 3 | 0 |
| Case 50 | 2 | 77,797,064  | 77,797,064  | 3 | 1 | 4 | 0 |
| Case 50 | 2 | 77,805,397  | 77,805,397  | 3 | 0 | 3 | 1 |
| Case 50 | 2 | 77,826,046  | 77,935,129  | 1 | 0 | 1 | 0 |
| Case 50 | 2 | 77,936,605  | 77,989,607  | 2 | 0 | 2 | 1 |
| Case 50 | 2 | 77,990,389  | 78,048,765  | 1 | 0 | 1 | 0 |
| Case 50 | 2 | 78,048,788  | 78,082,472  | 2 | 0 | 2 | 1 |
| Case 50 | 2 | 78,089,383  | 78,301,879  | 3 | 0 | 3 | 1 |
| Case 50 | 2 | 78,304,795  | 79,776,291  | 2 | 1 | 3 | 0 |
| Case 50 | 2 | 79,779,796  | 79,779,796  | 3 | 0 | 3 | 1 |
| Case 50 | 2 | 79,781,587  | 79,781,587  | 2 | 0 | 2 | 1 |
| Case 50 | 2 | 79,781,745  | 79,783,547  | 3 | 0 | 3 | 1 |
| Case 50 | 2 | 79,784,187  | 79,784,187  | 2 | 0 | 2 | 1 |
| Case 50 | 2 | 79,785,810  | 79,811,317  | 1 | 0 | 1 | 0 |
| Case 50 | 2 | 79,813,196  | 79,906,739  | 2 | 0 | 2 | 1 |
| Case 50 | 2 | 79,907,315  | 79,922,802  | 1 | 0 | 1 | 0 |
| Case 50 | 2 | 79,925,969  | 79,991,610  | 2 | 0 | 2 | 1 |
| Case 50 | 2 | 79,992,038  | 80,054,826  | 3 | 0 | 3 | 1 |
| Case 50 | 2 | 80,055,917  | 80,312,122  | 2 | 1 | 3 | 0 |
| Case 50 | 2 | 80,315,216  | 80,344,355  | 1 | 1 | 2 | 0 |
| Case 50 | 2 | 80,365,193  | 80,470,464  | 2 | 1 | 3 | 0 |
| Case 50 | 2 | 80,474,158  | 80,504,787  | 1 | 1 | 2 | 0 |
| Case 50 | 2 | 80,514,672  | 83,136,642  | 2 | 1 | 3 | 0 |
| Case 50 | 2 | 83,146,534  | 83,267,197  | 1 | 1 | 2 | 0 |
| Case 50 | 2 | 83,273,436  | 92,081,640  | 2 | 1 | 3 | 0 |
| Case 50 | 2 | 95,429,424  | 95,455,258  | 3 | 1 | 4 | 0 |
| Case 50 | 2 | 95,485,567  | 95,722,609  | 4 | 1 | 5 | 0 |
| Case 50 | 2 | 95,734,474  | 96,780,650  | 3 | 1 | 4 | 0 |
| Case 50 | 2 | 96,780,716  | 111,691,199 | 4 | 0 | 4 | 1 |
| Case 50 | 2 | 111,695,479 | 123,780,262 | 3 | 0 | 3 | 1 |
| Case 50 | 2 | 123,795,919 | 123,808,961 | 1 | 0 | 1 | 0 |
| Case 50 | 2 | 123,809,708 | 123,937,555 | 2 | 0 | 2 | 1 |
| Case 50 | 2 | 123,943,220 | 139,080,891 | 3 | 0 | 3 | 1 |

|         |   |             |             |   |   |   |   |
|---------|---|-------------|-------------|---|---|---|---|
| Case 50 | 2 | 139,082,736 | 139,328,799 | 2 | 0 | 2 | 1 |
| Case 50 | 2 | 139,332,687 | 157,778,161 | 3 | 0 | 3 | 1 |
| Case 50 | 2 | 157,785,456 | 157,802,125 | 2 | 0 | 2 | 1 |
| Case 50 | 2 | 157,805,435 | 182,521,535 | 3 | 0 | 3 | 1 |
| Case 50 | 2 | 182,521,541 | 182,716,212 | 4 | 0 | 4 | 1 |
| Case 50 | 2 | 182,733,299 | 187,213,730 | 3 | 0 | 3 | 1 |
| Case 50 | 2 | 187,240,797 | 187,360,053 | 2 | 0 | 2 | 1 |
| Case 50 | 2 | 187,366,061 | 187,521,118 | 0 | 0 | 0 | 0 |
| Case 50 | 2 | 187,521,260 | 187,562,355 | 2 | 0 | 2 | 1 |
| Case 50 | 2 | 187,571,699 | 195,219,153 | 3 | 0 | 3 | 1 |
| Case 50 | 2 | 195,266,232 | 243,048,760 | 4 | 0 | 4 | 1 |
| Case 50 | 3 | 61,495      | 958,096     | 3 | 1 | 4 | 0 |
| Case 50 | 3 | 963,381     | 3,581,077   | 3 | 0 | 3 | 1 |
| Case 50 | 3 | 3,582,105   | 3,731,439   | 5 | 0 | 5 | 1 |
| Case 50 | 3 | 3,732,283   | 3,792,051   | 4 | 0 | 4 | 1 |
| Case 50 | 3 | 3,792,945   | 4,351,751   | 5 | 0 | 5 | 1 |
| Case 50 | 3 | 4,353,466   | 4,969,387   | 4 | 0 | 4 | 1 |
| Case 50 | 3 | 4,973,586   | 6,753,259   | 3 | 0 | 3 | 1 |
| Case 50 | 3 | 6,760,499   | 9,703,844   | 6 | 0 | 6 | 1 |
| Case 50 | 3 | 9,709,043   | 10,211,918  | 5 | 0 | 5 | 1 |
| Case 50 | 3 | 10,212,258  | 10,212,258  | 3 | 0 | 3 | 1 |
| Case 50 | 3 | 10,212,494  | 11,059,847  | 6 | 0 | 6 | 1 |
| Case 50 | 3 | 11,060,302  | 12,287,863  | 5 | 0 | 5 | 1 |
| Case 50 | 3 | 12,287,944  | 12,287,944  | 3 | 0 | 3 | 1 |
| Case 50 | 3 | 12,289,800  | 12,442,578  | 6 | 0 | 6 | 1 |
| Case 50 | 3 | 12,442,833  | 12,641,718  | 5 | 0 | 5 | 1 |
| Case 50 | 3 | 12,649,576  | 13,671,321  | 6 | 0 | 6 | 1 |
| Case 50 | 3 | 13,671,392  | 15,391,894  | 5 | 0 | 5 | 1 |
| Case 50 | 3 | 15,410,365  | 16,381,111  | 3 | 0 | 3 | 1 |
| Case 50 | 3 | 16,385,395  | 16,602,491  | 5 | 0 | 5 | 1 |
| Case 50 | 3 | 16,617,862  | 16,617,862  | 3 | 0 | 3 | 1 |
| Case 50 | 3 | 16,619,147  | 16,784,389  | 6 | 0 | 6 | 1 |
| Case 50 | 3 | 16,785,673  | 17,209,300  | 5 | 0 | 5 | 1 |
| Case 50 | 3 | 17,213,357  | 17,213,357  | 3 | 0 | 3 | 1 |
| Case 50 | 3 | 17,214,070  | 19,103,739  | 6 | 0 | 6 | 1 |
| Case 50 | 3 | 19,112,134  | 21,535,708  | 3 | 0 | 3 | 1 |
| Case 50 | 3 | 21,544,296  | 22,318,273  | 6 | 0 | 6 | 1 |
| Case 50 | 3 | 22,327,742  | 25,985,168  | 3 | 0 | 3 | 1 |
| Case 50 | 3 | 25,994,433  | 26,076,713  | 6 | 0 | 6 | 1 |
| Case 50 | 3 | 26,085,604  | 40,715,040  | 3 | 0 | 3 | 1 |
| Case 50 | 3 | 40,722,876  | 41,083,932  | 4 | 0 | 4 | 1 |
| Case 50 | 3 | 41,085,459  | 53,084,326  | 3 | 0 | 3 | 1 |
| Case 50 | 3 | 53,092,375  | 53,164,412  | 2 | 0 | 2 | 1 |
| Case 50 | 3 | 53,175,557  | 60,120,954  | 3 | 0 | 3 | 1 |
| Case 50 | 3 | 60,122,156  | 60,138,099  | 0 | 0 | 0 | 0 |
| Case 50 | 3 | 60,144,588  | 60,220,486  | 3 | 0 | 3 | 1 |
| Case 50 | 3 | 60,228,660  | 60,753,126  | 0 | 0 | 0 | 0 |
| Case 50 | 3 | 60,759,462  | 60,780,913  | 3 | 0 | 3 | 1 |
| Case 50 | 3 | 60,788,842  | 60,908,013  | 0 | 0 | 0 | 0 |
| Case 50 | 3 | 60,918,609  | 71,330,583  | 3 | 0 | 3 | 1 |
| Case 50 | 3 | 71,330,949  | 71,677,817  | 2 | 0 | 2 | 1 |
| Case 50 | 3 | 71,681,950  | 85,336,559  | 3 | 0 | 3 | 1 |
| Case 50 | 3 | 85,349,089  | 85,402,469  | 1 | 0 | 1 | 0 |
| Case 50 | 3 | 85,404,783  | 85,658,202  | 2 | 0 | 2 | 1 |
| Case 50 | 3 | 85,661,265  | 90,442,925  | 3 | 0 | 3 | 1 |
| Case 50 | 3 | 93,537,290  | 103,252,139 | 3 | 1 | 4 | 0 |
| Case 50 | 3 | 103,256,322 | 175,064,809 | 3 | 0 | 3 | 1 |
| Case 50 | 3 | 175,066,203 | 175,124,340 | 2 | 0 | 2 | 1 |
| Case 50 | 3 | 175,124,541 | 175,293,892 | 1 | 0 | 1 | 0 |
| Case 50 | 3 | 175,293,957 | 175,329,367 | 2 | 0 | 2 | 1 |
| Case 50 | 3 | 175,334,302 | 197,838,262 | 3 | 0 | 3 | 1 |

|         |   |             |             |   |   |   |   |
|---------|---|-------------|-------------|---|---|---|---|
| Case 50 | 4 | 71,566      | 5,384,256   | 4 | 0 | 4 | 1 |
| Case 50 | 4 | 5,387,403   | 49,620,898  | 3 | 0 | 3 | 1 |
| Case 50 | 4 | 52,697,856  | 91,860,898  | 3 | 0 | 3 | 1 |
| Case 50 | 4 | 91,862,940  | 91,911,048  | 2 | 0 | 2 | 1 |
| Case 50 | 4 | 91,911,417  | 92,009,492  | 1 | 0 | 1 | 0 |
| Case 50 | 4 | 92,014,627  | 92,042,065  | 2 | 0 | 2 | 1 |
| Case 50 | 4 | 92,053,582  | 136,525,023 | 3 | 0 | 3 | 1 |
| Case 50 | 4 | 136,543,136 | 136,599,787 | 5 | 0 | 5 | 1 |
| Case 50 | 4 | 136,606,270 | 144,945,108 | 3 | 0 | 3 | 1 |
| Case 50 | 4 | 144,949,348 | 145,035,868 | 5 | 0 | 5 | 1 |
| Case 50 | 4 | 145,040,841 | 149,362,744 | 3 | 0 | 3 | 1 |
| Case 50 | 4 | 149,379,537 | 149,447,366 | 2 | 0 | 2 | 1 |
| Case 50 | 4 | 149,461,969 | 151,863,847 | 3 | 0 | 3 | 1 |
| Case 50 | 4 | 151,880,765 | 151,918,331 | 1 | 0 | 1 | 0 |
| Case 50 | 4 | 151,935,601 | 172,278,868 | 3 | 0 | 3 | 1 |
| Case 50 | 4 | 172,311,051 | 172,338,748 | 1 | 0 | 1 | 0 |
| Case 50 | 4 | 172,347,176 | 190,963,766 | 3 | 0 | 3 | 1 |
| Case 50 | 5 | 38,139      | 1,115,240   | 3 | 1 | 4 | 0 |
| Case 50 | 5 | 1,120,954   | 1,200,882   | 4 | 1 | 5 | 0 |
| Case 50 | 5 | 1,201,599   | 2,902,999   | 3 | 1 | 4 | 0 |
| Case 50 | 5 | 2,907,012   | 2,979,710   | 4 | 1 | 5 | 0 |
| Case 50 | 5 | 2,981,865   | 3,800,097   | 3 | 1 | 4 | 0 |
| Case 50 | 5 | 3,801,906   | 4,101,569   | 4 | 1 | 5 | 0 |
| Case 50 | 5 | 4,104,155   | 4,269,803   | 3 | 1 | 4 | 0 |
| Case 50 | 5 | 4,275,538   | 5,235,252   | 4 | 1 | 5 | 0 |
| Case 50 | 5 | 5,235,264   | 6,826,269   | 3 | 1 | 4 | 0 |
| Case 50 | 5 | 6,827,513   | 7,625,795   | 4 | 1 | 5 | 0 |
| Case 50 | 5 | 7,629,191   | 7,893,006   | 3 | 1 | 4 | 0 |
| Case 50 | 5 | 7,893,013   | 16,572,153  | 4 | 1 | 5 | 0 |
| Case 50 | 5 | 16,572,211  | 16,732,052  | 3 | 1 | 4 | 0 |
| Case 50 | 5 | 16,737,513  | 16,923,843  | 4 | 1 | 5 | 0 |
| Case 50 | 5 | 16,924,422  | 17,276,986  | 3 | 1 | 4 | 0 |
| Case 50 | 5 | 17,283,265  | 31,588,686  | 4 | 1 | 5 | 0 |
| Case 50 | 5 | 31,589,480  | 31,769,180  | 3 | 1 | 4 | 0 |
| Case 50 | 5 | 31,770,733  | 32,087,662  | 4 | 1 | 5 | 0 |
| Case 50 | 5 | 32,087,771  | 32,263,407  | 3 | 1 | 4 | 0 |
| Case 50 | 5 | 32,278,628  | 36,926,756  | 4 | 1 | 5 | 0 |
| Case 50 | 5 | 36,927,652  | 37,007,629  | 3 | 1 | 4 | 0 |
| Case 50 | 5 | 37,023,898  | 46,127,095  | 4 | 1 | 5 | 0 |
| Case 50 | 5 | 46,128,475  | 46,399,093  | 3 | 1 | 4 | 0 |
| Case 50 | 5 | 49,457,282  | 49,614,318  | 1 | 1 | 2 | 0 |
| Case 50 | 5 | 49,624,236  | 103,685,244 | 2 | 1 | 3 | 0 |
| Case 50 | 5 | 103,685,345 | 103,989,098 | 3 | 0 | 3 | 1 |
| Case 50 | 5 | 103,994,246 | 104,169,727 | 2 | 0 | 2 | 1 |
| Case 50 | 5 | 104,174,305 | 104,355,383 | 3 | 0 | 3 | 1 |
| Case 50 | 5 | 104,356,452 | 104,356,452 | 3 | 1 | 4 | 0 |
| Case 50 | 5 | 104,356,919 | 105,324,438 | 2 | 1 | 3 | 0 |
| Case 50 | 5 | 105,350,426 | 124,285,289 | 3 | 1 | 4 | 0 |
| Case 50 | 5 | 124,287,674 | 124,361,999 | 2 | 1 | 3 | 0 |
| Case 50 | 5 | 124,365,967 | 139,930,736 | 3 | 1 | 4 | 0 |
| Case 50 | 5 | 139,931,384 | 139,931,620 | 3 | 0 | 3 | 1 |
| Case 50 | 5 | 139,931,629 | 139,931,644 | 1 | 0 | 1 | 0 |
| Case 50 | 5 | 139,931,646 | 139,931,653 | 2 | 0 | 2 | 1 |
| Case 50 | 5 | 139,931,655 | 139,931,740 | 3 | 0 | 3 | 1 |
| Case 50 | 5 | 139,936,760 | 177,574,421 | 3 | 1 | 4 | 0 |
| Case 50 | 5 | 177,574,594 | 177,640,813 | 2 | 1 | 3 | 0 |
| Case 50 | 5 | 177,642,337 | 180,693,127 | 3 | 1 | 4 | 0 |
| Case 50 | 6 | 108,666     | 2,012,739   | 3 | 0 | 3 | 1 |
| Case 50 | 6 | 2,028,237   | 2,123,744   | 0 | 0 | 0 | 0 |
| Case 50 | 6 | 2,139,450   | 53,427,397  | 3 | 0 | 3 | 1 |
| Case 50 | 6 | 53,429,272  | 53,519,771  | 2 | 2 | 4 | 0 |

|         |   |             |             |   |   |   |   |
|---------|---|-------------|-------------|---|---|---|---|
| Case 50 | 6 | 53,519,772  | 55,714,563  | 3 | 2 | 5 | 0 |
| Case 50 | 6 | 55,715,715  | 55,715,715  | 3 | 0 | 3 | 1 |
| Case 50 | 6 | 55,716,160  | 58,752,089  | 3 | 1 | 4 | 0 |
| Case 50 | 6 | 61,891,118  | 67,656,128  | 3 | 1 | 4 | 0 |
| Case 50 | 6 | 67,660,858  | 67,666,442  | 2 | 2 | 4 | 0 |
| Case 50 | 6 | 67,672,896  | 71,726,234  | 3 | 2 | 5 | 0 |
| Case 50 | 6 | 71,729,002  | 73,109,948  | 2 | 2 | 4 | 0 |
| Case 50 | 6 | 73,110,390  | 73,749,861  | 3 | 2 | 5 | 0 |
| Case 50 | 6 | 73,749,874  | 74,123,695  | 2 | 2 | 4 | 0 |
| Case 50 | 6 | 74,125,875  | 75,994,151  | 3 | 2 | 5 | 0 |
| Case 50 | 6 | 75,994,198  | 76,063,329  | 2 | 2 | 4 | 0 |
| Case 50 | 6 | 76,063,393  | 86,874,123  | 3 | 2 | 5 | 0 |
| Case 50 | 6 | 86,874,355  | 89,317,670  | 2 | 2 | 4 | 0 |
| Case 50 | 6 | 89,318,640  | 89,904,872  | 3 | 2 | 5 | 0 |
| Case 50 | 6 | 89,905,239  | 90,695,766  | 2 | 2 | 4 | 0 |
| Case 50 | 6 | 90,698,125  | 99,326,490  | 3 | 2 | 5 | 0 |
| Case 50 | 6 | 99,328,430  | 99,665,178  | 2 | 2 | 4 | 0 |
| Case 50 | 6 | 99,669,676  | 103,022,838 | 3 | 2 | 5 | 0 |
| Case 50 | 6 | 103,028,147 | 103,146,074 | 2 | 2 | 4 | 0 |
| Case 50 | 6 | 103,157,617 | 106,549,398 | 3 | 2 | 5 | 0 |
| Case 50 | 6 | 106,552,031 | 106,601,936 | 2 | 2 | 4 | 0 |
| Case 50 | 6 | 106,604,136 | 107,976,518 | 3 | 2 | 5 | 0 |
| Case 50 | 6 | 107,976,756 | 108,201,868 | 2 | 2 | 4 | 0 |
| Case 50 | 6 | 108,213,533 | 108,451,893 | 3 | 2 | 5 | 0 |
| Case 50 | 6 | 108,454,437 | 108,859,593 | 2 | 2 | 4 | 0 |
| Case 50 | 6 | 108,862,295 | 110,714,240 | 3 | 2 | 5 | 0 |
| Case 50 | 6 | 110,714,316 | 110,936,144 | 2 | 2 | 4 | 0 |
| Case 50 | 6 | 110,938,109 | 112,463,076 | 3 | 2 | 5 | 0 |
| Case 50 | 6 | 112,463,333 | 112,510,818 | 2 | 2 | 4 | 0 |
| Case 50 | 6 | 112,511,852 | 118,053,656 | 3 | 2 | 5 | 0 |
| Case 50 | 6 | 118,063,402 | 118,437,378 | 2 | 2 | 4 | 0 |
| Case 50 | 6 | 118,440,834 | 118,812,980 | 3 | 2 | 5 | 0 |
| Case 50 | 6 | 118,819,212 | 119,137,445 | 2 | 2 | 4 | 0 |
| Case 50 | 6 | 119,147,356 | 123,950,488 | 3 | 2 | 5 | 0 |
| Case 50 | 6 | 123,955,723 | 124,150,232 | 3 | 0 | 3 | 1 |
| Case 50 | 6 | 124,153,758 | 124,156,824 | 2 | 2 | 4 | 0 |
| Case 50 | 6 | 124,159,438 | 130,617,329 | 3 | 2 | 5 | 0 |
| Case 50 | 6 | 130,627,814 | 130,789,541 | 2 | 2 | 4 | 0 |
| Case 50 | 6 | 130,789,807 | 131,189,874 | 3 | 2 | 5 | 0 |
| Case 50 | 6 | 131,190,746 | 131,277,586 | 2 | 2 | 4 | 0 |
| Case 50 | 6 | 131,278,669 | 135,005,295 | 3 | 2 | 5 | 0 |
| Case 50 | 6 | 135,005,715 | 135,263,557 | 2 | 2 | 4 | 0 |
| Case 50 | 6 | 135,263,603 | 136,552,492 | 3 | 2 | 5 | 0 |
| Case 50 | 6 | 136,552,493 | 136,760,581 | 2 | 2 | 4 | 0 |
| Case 50 | 6 | 136,765,459 | 137,332,551 | 3 | 2 | 5 | 0 |
| Case 50 | 6 | 137,333,718 | 137,454,459 | 3 | 0 | 3 | 1 |
| Case 50 | 6 | 137,462,218 | 137,464,218 | 2 | 2 | 4 | 0 |
| Case 50 | 6 | 137,464,916 | 143,077,289 | 3 | 2 | 5 | 0 |
| Case 50 | 6 | 143,080,039 | 143,095,682 | 2 | 2 | 4 | 0 |
| Case 50 | 6 | 143,097,493 | 144,436,070 | 3 | 2 | 5 | 0 |
| Case 50 | 6 | 144,444,514 | 144,699,731 | 3 | 0 | 3 | 1 |
| Case 50 | 6 | 144,702,116 | 144,766,077 | 2 | 2 | 4 | 0 |
| Case 50 | 6 | 144,768,755 | 144,937,933 | 3 | 2 | 5 | 0 |
| Case 50 | 6 | 144,943,157 | 146,480,637 | 3 | 0 | 3 | 1 |
| Case 50 | 6 | 146,480,705 | 146,488,167 | 2 | 2 | 4 | 0 |
| Case 50 | 6 | 146,503,040 | 146,785,984 | 3 | 2 | 5 | 0 |
| Case 50 | 6 | 146,794,697 | 147,723,577 | 3 | 0 | 3 | 1 |
| Case 50 | 6 | 147,730,324 | 147,767,235 | 2 | 2 | 4 | 0 |
| Case 50 | 6 | 147,780,366 | 148,242,514 | 3 | 2 | 5 | 0 |
| Case 50 | 6 | 148,247,765 | 162,668,889 | 3 | 0 | 3 | 1 |
| Case 50 | 6 | 162,671,390 | 162,733,752 | 0 | 0 | 0 | 0 |

|         |   |             |             |   |   |   |   |
|---------|---|-------------|-------------|---|---|---|---|
| Case 50 | 6 | 162,736,336 | 163,192,038 | 3 | 0 | 3 | 1 |
| Case 50 | 6 | 163,201,379 | 163,280,204 | 0 | 0 | 0 | 0 |
| Case 50 | 6 | 163,284,038 | 170,980,171 | 3 | 0 | 3 | 1 |
| Case 50 | 7 | 44,935      | 2,748,717   | 2 | 2 | 4 | 0 |
| Case 50 | 7 | 2,748,830   | 2,752,330   | 3 | 2 | 5 | 0 |
| Case 50 | 7 | 2,752,346   | 3,284,594   | 2 | 2 | 4 | 0 |
| Case 50 | 7 | 3,285,433   | 3,624,238   | 3 | 2 | 5 | 0 |
| Case 50 | 7 | 3,627,799   | 4,824,629   | 2 | 2 | 4 | 0 |
| Case 50 | 7 | 4,825,069   | 4,843,307   | 3 | 2 | 5 | 0 |
| Case 50 | 7 | 4,843,335   | 7,040,500   | 2 | 2 | 4 | 0 |
| Case 50 | 7 | 7,044,010   | 24,376,523  | 3 | 2 | 5 | 0 |
| Case 50 | 7 | 24,378,040  | 24,537,240  | 2 | 2 | 4 | 0 |
| Case 50 | 7 | 24,540,300  | 26,614,241  | 3 | 2 | 5 | 0 |
| Case 50 | 7 | 26,615,293  | 26,695,215  | 2 | 2 | 4 | 0 |
| Case 50 | 7 | 26,699,295  | 27,140,662  | 3 | 2 | 5 | 0 |
| Case 50 | 7 | 27,140,670  | 27,223,563  | 2 | 2 | 4 | 0 |
| Case 50 | 7 | 27,224,368  | 29,437,196  | 3 | 2 | 5 | 0 |
| Case 50 | 7 | 29,438,109  | 29,606,425  | 2 | 2 | 4 | 0 |
| Case 50 | 7 | 29,612,042  | 30,124,438  | 3 | 2 | 5 | 0 |
| Case 50 | 7 | 30,125,924  | 30,198,899  | 2 | 2 | 4 | 0 |
| Case 50 | 7 | 30,198,958  | 30,605,567  | 3 | 2 | 5 | 0 |
| Case 50 | 7 | 30,616,761  | 31,333,947  | 2 | 2 | 4 | 0 |
| Case 50 | 7 | 31,335,097  | 31,465,743  | 3 | 2 | 5 | 0 |
| Case 50 | 7 | 31,466,377  | 31,862,768  | 2 | 2 | 4 | 0 |
| Case 50 | 7 | 31,862,774  | 32,262,377  | 3 | 2 | 5 | 0 |
| Case 50 | 7 | 32,263,161  | 32,415,383  | 2 | 2 | 4 | 0 |
| Case 50 | 7 | 32,423,399  | 32,694,219  | 3 | 2 | 5 | 0 |
| Case 50 | 7 | 32,711,465  | 32,955,265  | 2 | 2 | 4 | 0 |
| Case 50 | 7 | 32,964,751  | 33,662,618  | 3 | 2 | 5 | 0 |
| Case 50 | 7 | 33,667,314  | 34,167,361  | 2 | 2 | 4 | 0 |
| Case 50 | 7 | 34,168,028  | 34,485,137  | 3 | 2 | 5 | 0 |
| Case 50 | 7 | 34,493,607  | 36,338,762  | 2 | 2 | 4 | 0 |
| Case 50 | 7 | 36,338,967  | 36,820,963  | 3 | 2 | 5 | 0 |
| Case 50 | 7 | 36,823,940  | 37,005,260  | 2 | 2 | 4 | 0 |
| Case 50 | 7 | 37,007,533  | 37,923,923  | 3 | 2 | 5 | 0 |
| Case 50 | 7 | 37,924,000  | 38,229,107  | 2 | 2 | 4 | 0 |
| Case 50 | 7 | 38,231,628  | 39,303,142  | 3 | 2 | 5 | 0 |
| Case 50 | 7 | 39,304,125  | 39,880,053  | 2 | 2 | 4 | 0 |
| Case 50 | 7 | 39,885,541  | 41,374,447  | 3 | 2 | 5 | 0 |
| Case 50 | 7 | 41,375,616  | 46,261,209  | 2 | 2 | 4 | 0 |
| Case 50 | 7 | 46,261,337  | 47,370,958  | 3 | 2 | 5 | 0 |
| Case 50 | 7 | 47,374,770  | 48,100,016  | 2 | 2 | 4 | 0 |
| Case 50 | 7 | 48,106,209  | 50,513,062  | 3 | 2 | 5 | 0 |
| Case 50 | 7 | 50,513,088  | 51,987,979  | 2 | 2 | 4 | 0 |
| Case 50 | 7 | 51,991,339  | 53,424,191  | 3 | 2 | 5 | 0 |
| Case 50 | 7 | 53,427,973  | 53,970,911  | 2 | 2 | 4 | 0 |
| Case 50 | 7 | 53,980,226  | 54,423,086  | 3 | 2 | 5 | 0 |
| Case 50 | 7 | 54,430,725  | 54,646,788  | 2 | 2 | 4 | 0 |
| Case 50 | 7 | 54,651,526  | 55,180,110  | 3 | 2 | 5 | 0 |
| Case 50 | 7 | 55,181,442  | 58,019,061  | 2 | 2 | 4 | 0 |
| Case 50 | 7 | 61,056,053  | 64,679,561  | 2 | 2 | 4 | 0 |
| Case 50 | 7 | 64,696,330  | 65,202,326  | 3 | 2 | 5 | 0 |
| Case 50 | 7 | 65,203,587  | 69,488,331  | 2 | 2 | 4 | 0 |
| Case 50 | 7 | 69,505,703  | 69,783,020  | 3 | 0 | 3 | 1 |
| Case 50 | 7 | 69,783,198  | 76,111,938  | 2 | 2 | 4 | 0 |
| Case 50 | 7 | 76,112,299  | 77,663,486  | 3 | 2 | 5 | 0 |
| Case 50 | 7 | 77,663,791  | 77,818,152  | 2 | 2 | 4 | 0 |
| Case 50 | 7 | 77,821,780  | 88,962,700  | 3 | 2 | 5 | 0 |
| Case 50 | 7 | 88,962,827  | 88,966,204  | 2 | 2 | 4 | 0 |
| Case 50 | 7 | 88,969,883  | 97,595,215  | 3 | 2 | 5 | 0 |
| Case 50 | 7 | 97,602,656  | 99,264,573  | 2 | 2 | 4 | 0 |

|         |   |             |             |   |   |   |   |
|---------|---|-------------|-------------|---|---|---|---|
| Case 50 | 7 | 99,266,318  | 99,473,714  | 3 | 2 | 5 | 0 |
| Case 50 | 7 | 99,473,801  | 102,105,207 | 2 | 2 | 4 | 0 |
| Case 50 | 7 | 102,105,234 | 104,400,165 | 3 | 2 | 5 | 0 |
| Case 50 | 7 | 104,402,709 | 105,803,764 | 2 | 2 | 4 | 0 |
| Case 50 | 7 | 105,807,547 | 106,398,153 | 3 | 2 | 5 | 0 |
| Case 50 | 7 | 106,399,168 | 106,549,902 | 2 | 2 | 4 | 0 |
| Case 50 | 7 | 106,556,805 | 117,227,832 | 3 | 2 | 5 | 0 |
| Case 50 | 7 | 117,227,860 | 117,307,108 | 2 | 2 | 4 | 0 |
| Case 50 | 7 | 117,307,487 | 127,185,250 | 3 | 2 | 5 | 0 |
| Case 50 | 7 | 127,190,237 | 129,312,570 | 2 | 2 | 4 | 0 |
| Case 50 | 7 | 129,321,191 | 129,915,016 | 3 | 2 | 5 | 0 |
| Case 50 | 7 | 129,915,048 | 132,839,865 | 2 | 2 | 4 | 0 |
| Case 50 | 7 | 132,849,038 | 133,915,760 | 3 | 2 | 5 | 0 |
| Case 50 | 7 | 133,919,032 | 134,678,327 | 2 | 2 | 4 | 0 |
| Case 50 | 7 | 134,678,463 | 134,851,604 | 3 | 2 | 5 | 0 |
| Case 50 | 7 | 134,852,551 | 135,521,869 | 2 | 2 | 4 | 0 |
| Case 50 | 7 | 135,522,547 | 136,340,237 | 3 | 2 | 5 | 0 |
| Case 50 | 7 | 136,340,792 | 136,700,369 | 2 | 2 | 4 | 0 |
| Case 50 | 7 | 136,700,385 | 137,374,693 | 3 | 2 | 5 | 0 |
| Case 50 | 7 | 137,380,919 | 137,764,147 | 2 | 2 | 4 | 0 |
| Case 50 | 7 | 137,767,051 | 138,304,579 | 3 | 2 | 5 | 0 |
| Case 50 | 7 | 138,305,782 | 140,394,164 | 2 | 2 | 4 | 0 |
| Case 50 | 7 | 140,394,527 | 140,970,382 | 3 | 2 | 5 | 0 |
| Case 50 | 7 | 140,971,872 | 141,341,613 | 2 | 2 | 4 | 0 |
| Case 50 | 7 | 141,348,813 | 141,464,029 | 3 | 2 | 5 | 0 |
| Case 50 | 7 | 141,464,038 | 141,816,117 | 2 | 2 | 4 | 0 |
| Case 50 | 7 | 141,817,070 | 142,515,811 | 3 | 2 | 5 | 0 |
| Case 50 | 7 | 142,525,336 | 143,748,430 | 2 | 2 | 4 | 0 |
| Case 50 | 7 | 143,752,228 | 146,046,444 | 3 | 2 | 5 | 0 |
| Case 50 | 7 | 146,048,830 | 146,377,256 | 3 | 0 | 3 | 1 |
| Case 50 | 7 | 146,378,140 | 146,378,140 | 2 | 2 | 4 | 0 |
| Case 50 | 7 | 146,386,265 | 147,595,929 | 3 | 2 | 5 | 0 |
| Case 50 | 7 | 147,597,251 | 149,394,446 | 2 | 2 | 4 | 0 |
| Case 50 | 7 | 149,398,065 | 149,529,955 | 3 | 2 | 5 | 0 |
| Case 50 | 7 | 149,529,962 | 151,845,129 | 2 | 2 | 4 | 0 |
| Case 50 | 7 | 151,846,114 | 151,888,002 | 3 | 2 | 5 | 0 |
| Case 50 | 7 | 151,896,365 | 159,119,486 | 2 | 2 | 4 | 0 |
| Case 50 | 8 | 164,984     | 2,132,561   | 2 | 1 | 3 | 0 |
| Case 50 | 8 | 2,133,338   | 2,391,471   | 3 | 1 | 4 | 0 |
| Case 50 | 8 | 2,394,776   | 14,090,481  | 2 | 1 | 3 | 0 |
| Case 50 | 8 | 14,091,774  | 14,148,298  | 1 | 1 | 2 | 0 |
| Case 50 | 8 | 14,151,079  | 15,773,679  | 2 | 1 | 3 | 0 |
| Case 50 | 8 | 15,774,587  | 15,795,560  | 1 | 1 | 2 | 0 |
| Case 50 | 8 | 15,795,898  | 35,721,527  | 2 | 1 | 3 | 0 |
| Case 50 | 8 | 35,734,227  | 43,791,691  | 3 | 1 | 4 | 0 |
| Case 50 | 8 | 46,886,735  | 51,213,802  | 3 | 1 | 4 | 0 |
| Case 50 | 8 | 51,227,228  | 51,227,777  | 1 | 1 | 2 | 0 |
| Case 50 | 8 | 51,230,812  | 146,293,414 | 3 | 1 | 4 | 0 |
| Case 50 | 9 | 46,587      | 357,653     | 4 | 1 | 5 | 0 |
| Case 50 | 9 | 359,338     | 424,327     | 3 | 1 | 4 | 0 |
| Case 50 | 9 | 424,875     | 680,540     | 4 | 1 | 5 | 0 |
| Case 50 | 9 | 680,585     | 742,230     | 3 | 1 | 4 | 0 |
| Case 50 | 9 | 742,350     | 969,044     | 4 | 1 | 5 | 0 |
| Case 50 | 9 | 972,476     | 1,057,116   | 3 | 1 | 4 | 0 |
| Case 50 | 9 | 1,057,256   | 8,255,691   | 4 | 1 | 5 | 0 |
| Case 50 | 9 | 8,257,725   | 8,786,827   | 3 | 1 | 4 | 0 |
| Case 50 | 9 | 8,787,733   | 8,922,467   | 2 | 1 | 3 | 0 |
| Case 50 | 9 | 8,923,010   | 8,923,010   | 4 | 0 | 4 | 1 |
| Case 50 | 9 | 8,923,351   | 8,926,956   | 3 | 0 | 3 | 1 |
| Case 50 | 9 | 8,936,967   | 8,982,620   | 1 | 0 | 1 | 0 |
| Case 50 | 9 | 8,984,469   | 9,119,349   | 2 | 0 | 2 | 1 |

|         |    |             |             |   |   |   |   |
|---------|----|-------------|-------------|---|---|---|---|
| Case 50 | 9  | 9,125,205   | 9,130,204   | 2 | 2 | 4 | 0 |
| Case 50 | 9  | 9,133,196   | 9,184,911   | 3 | 0 | 3 | 1 |
| Case 50 | 9  | 9,186,346   | 9,197,160   | 1 | 0 | 1 | 0 |
| Case 50 | 9  | 9,197,298   | 9,322,503   | 2 | 0 | 2 | 1 |
| Case 50 | 9  | 9,326,943   | 9,354,757   | 1 | 0 | 1 | 0 |
| Case 50 | 9  | 9,357,065   | 9,380,781   | 2 | 0 | 2 | 1 |
| Case 50 | 9  | 9,381,760   | 9,441,003   | 3 | 0 | 3 | 1 |
| Case 50 | 9  | 9,442,794   | 9,442,794   | 3 | 1 | 4 | 0 |
| Case 50 | 9  | 9,443,985   | 9,503,477   | 2 | 1 | 3 | 0 |
| Case 50 | 9  | 9,503,941   | 9,506,433   | 3 | 0 | 3 | 1 |
| Case 50 | 9  | 9,516,348   | 9,647,916   | 1 | 0 | 1 | 0 |
| Case 50 | 9  | 9,649,668   | 9,649,668   | 3 | 0 | 3 | 1 |
| Case 50 | 9  | 9,664,440   | 9,664,440   | 3 | 1 | 4 | 0 |
| Case 50 | 9  | 9,667,071   | 10,395,912  | 2 | 1 | 3 | 0 |
| Case 50 | 9  | 10,404,336  | 12,509,667  | 3 | 1 | 4 | 0 |
| Case 50 | 9  | 12,510,515  | 14,908,056  | 2 | 1 | 3 | 0 |
| Case 50 | 9  | 14,919,539  | 28,787,049  | 3 | 1 | 4 | 0 |
| Case 50 | 9  | 28,793,773  | 28,867,478  | 3 | 0 | 3 | 1 |
| Case 50 | 9  | 28,869,800  | 30,057,012  | 3 | 1 | 4 | 0 |
| Case 50 | 9  | 30,064,199  | 30,064,199  | 3 | 0 | 3 | 1 |
| Case 50 | 9  | 30,064,376  | 30,094,419  | 2 | 0 | 2 | 1 |
| Case 50 | 9  | 30,101,419  | 30,222,006  | 1 | 0 | 1 | 0 |
| Case 50 | 9  | 30,235,654  | 30,257,830  | 2 | 0 | 2 | 1 |
| Case 50 | 9  | 30,260,156  | 30,260,156  | 3 | 0 | 3 | 1 |
| Case 50 | 9  | 30,272,267  | 46,944,322  | 3 | 1 | 4 | 0 |
| Case 50 | 9  | 65,629,772  | 73,167,783  | 3 | 1 | 4 | 0 |
| Case 50 | 9  | 73,168,680  | 119,544,455 | 2 | 1 | 3 | 0 |
| Case 50 | 9  | 119,546,021 | 119,546,021 | 4 | 0 | 4 | 1 |
| Case 50 | 9  | 119,550,051 | 119,561,084 | 3 | 0 | 3 | 1 |
| Case 50 | 9  | 119,564,014 | 119,649,615 | 2 | 0 | 2 | 1 |
| Case 50 | 9  | 119,652,622 | 119,770,434 | 3 | 0 | 3 | 1 |
| Case 50 | 9  | 119,770,480 | 128,546,359 | 2 | 1 | 3 | 0 |
| Case 50 | 9  | 128,554,563 | 136,085,783 | 3 | 1 | 4 | 0 |
| Case 50 | 9  | 136,086,916 | 136,131,415 | 2 | 2 | 4 | 0 |
| Case 50 | 9  | 136,131,429 | 136,132,303 | 3 | 2 | 5 | 0 |
| Case 50 | 9  | 136,132,633 | 136,184,526 | 2 | 2 | 4 | 0 |
| Case 50 | 9  | 136,184,598 | 137,666,414 | 3 | 1 | 4 | 0 |
| Case 50 | 9  | 137,670,002 | 137,858,418 | 2 | 1 | 3 | 0 |
| Case 50 | 9  | 137,859,032 | 141,066,491 | 3 | 1 | 4 | 0 |
| Case 50 | 10 | 98,087      | 39,097,912  | 3 | 1 | 4 | 0 |
| Case 50 | 10 | 42,436,301  | 52,841,855  | 4 | 1 | 5 | 0 |
| Case 50 | 10 | 52,842,146  | 52,842,575  | 3 | 1 | 4 | 0 |
| Case 50 | 10 | 52,848,799  | 54,804,747  | 5 | 1 | 6 | 0 |
| Case 50 | 10 | 54,807,938  | 70,636,836  | 4 | 1 | 5 | 0 |
| Case 50 | 10 | 70,637,445  | 71,025,548  | 3 | 1 | 4 | 0 |
| Case 50 | 10 | 71,026,433  | 71,091,013  | 4 | 1 | 5 | 0 |
| Case 50 | 10 | 71,092,803  | 71,246,647  | 3 | 1 | 4 | 0 |
| Case 50 | 10 | 71,247,667  | 71,389,673  | 4 | 1 | 5 | 0 |
| Case 50 | 10 | 71,391,507  | 71,689,148  | 3 | 1 | 4 | 0 |
| Case 50 | 10 | 71,689,645  | 71,862,654  | 4 | 1 | 5 | 0 |
| Case 50 | 10 | 71,866,161  | 73,826,849  | 3 | 1 | 4 | 0 |
| Case 50 | 10 | 73,827,371  | 74,923,562  | 4 | 1 | 5 | 0 |
| Case 50 | 10 | 74,923,670  | 75,705,977  | 3 | 1 | 4 | 0 |
| Case 50 | 10 | 75,708,906  | 76,071,203  | 4 | 1 | 5 | 0 |
| Case 50 | 10 | 76,074,489  | 76,074,489  | 3 | 1 | 4 | 0 |
| Case 50 | 10 | 76,089,182  | 76,089,182  | 3 | 0 | 3 | 1 |
| Case 50 | 10 | 76,092,691  | 76,373,904  | 1 | 0 | 1 | 0 |
| Case 50 | 10 | 76,400,262  | 76,400,262  | 3 | 0 | 3 | 1 |
| Case 50 | 10 | 76,401,365  | 76,403,131  | 3 | 1 | 4 | 0 |
| Case 50 | 10 | 76,415,509  | 79,479,119  | 4 | 1 | 5 | 0 |
| Case 50 | 10 | 79,489,015  | 82,049,332  | 3 | 1 | 4 | 0 |

|         |    |             |             |   |   |   |   |
|---------|----|-------------|-------------|---|---|---|---|
| Case 50 | 10 | 82,054,873  | 85,915,186  | 4 | 1 | 5 | 0 |
| Case 50 | 10 | 85,920,085  | 85,970,853  | 3 | 1 | 4 | 0 |
| Case 50 | 10 | 85,970,910  | 87,715,434  | 4 | 1 | 5 | 0 |
| Case 50 | 10 | 87,717,641  | 88,181,002  | 3 | 1 | 4 | 0 |
| Case 50 | 10 | 88,193,911  | 94,822,350  | 4 | 1 | 5 | 0 |
| Case 50 | 10 | 94,822,580  | 94,841,988  | 3 | 1 | 4 | 0 |
| Case 50 | 10 | 94,842,477  | 95,063,196  | 4 | 1 | 5 | 0 |
| Case 50 | 10 | 95,064,137  | 95,348,905  | 3 | 1 | 4 | 0 |
| Case 50 | 10 | 95,350,116  | 97,020,612  | 4 | 1 | 5 | 0 |
| Case 50 | 10 | 97,021,389  | 97,101,103  | 3 | 1 | 4 | 0 |
| Case 50 | 10 | 97,101,142  | 98,625,174  | 4 | 1 | 5 | 0 |
| Case 50 | 10 | 98,639,846  | 99,527,573  | 3 | 1 | 4 | 0 |
| Case 50 | 10 | 99,527,653  | 99,654,624  | 4 | 1 | 5 | 0 |
| Case 50 | 10 | 99,655,020  | 100,016,572 | 3 | 1 | 4 | 0 |
| Case 50 | 10 | 100,016,632 | 100,127,551 | 4 | 1 | 5 | 0 |
| Case 50 | 10 | 100,131,458 | 100,240,305 | 3 | 1 | 4 | 0 |
| Case 50 | 10 | 100,240,334 | 101,458,294 | 4 | 1 | 5 | 0 |
| Case 50 | 10 | 101,458,358 | 103,031,132 | 3 | 1 | 4 | 0 |
| Case 50 | 10 | 103,032,109 | 103,294,560 | 4 | 1 | 5 | 0 |
| Case 50 | 10 | 103,294,635 | 103,606,122 | 3 | 1 | 4 | 0 |
| Case 50 | 10 | 103,606,736 | 103,825,772 | 4 | 1 | 5 | 0 |
| Case 50 | 10 | 103,825,926 | 104,853,577 | 3 | 1 | 4 | 0 |
| Case 50 | 10 | 104,855,656 | 105,141,551 | 4 | 1 | 5 | 0 |
| Case 50 | 10 | 105,147,067 | 105,581,265 | 3 | 1 | 4 | 0 |
| Case 50 | 10 | 105,583,030 | 115,336,758 | 4 | 1 | 5 | 0 |
| Case 50 | 10 | 115,336,912 | 115,393,948 | 3 | 1 | 4 | 0 |
| Case 50 | 10 | 115,400,044 | 117,870,680 | 4 | 1 | 5 | 0 |
| Case 50 | 10 | 117,877,793 | 118,122,065 | 3 | 1 | 4 | 0 |
| Case 50 | 10 | 118,123,862 | 118,299,317 | 4 | 1 | 5 | 0 |
| Case 50 | 10 | 118,302,036 | 119,613,089 | 3 | 1 | 4 | 0 |
| Case 50 | 10 | 119,613,610 | 120,447,437 | 4 | 1 | 5 | 0 |
| Case 50 | 10 | 120,448,570 | 121,685,740 | 3 | 1 | 4 | 0 |
| Case 50 | 10 | 121,686,097 | 123,843,357 | 4 | 1 | 5 | 0 |
| Case 50 | 10 | 123,843,379 | 124,457,969 | 3 | 1 | 4 | 0 |
| Case 50 | 10 | 124,458,854 | 125,030,886 | 4 | 1 | 5 | 0 |
| Case 50 | 10 | 125,031,183 | 127,703,110 | 3 | 1 | 4 | 0 |
| Case 50 | 10 | 127,705,404 | 127,764,957 | 4 | 1 | 5 | 0 |
| Case 50 | 10 | 127,768,110 | 127,877,248 | 3 | 1 | 4 | 0 |
| Case 50 | 10 | 127,877,272 | 128,103,811 | 4 | 1 | 5 | 0 |
| Case 50 | 10 | 128,107,981 | 128,227,329 | 3 | 1 | 4 | 0 |
| Case 50 | 10 | 128,229,313 | 128,529,658 | 4 | 1 | 5 | 0 |
| Case 50 | 10 | 128,530,796 | 129,267,759 | 3 | 1 | 4 | 0 |
| Case 50 | 10 | 129,268,527 | 129,796,246 | 4 | 1 | 5 | 0 |
| Case 50 | 10 | 129,796,530 | 129,914,199 | 3 | 1 | 4 | 0 |
| Case 50 | 10 | 129,914,272 | 130,154,533 | 4 | 1 | 5 | 0 |
| Case 50 | 10 | 130,154,648 | 135,477,883 | 3 | 1 | 4 | 0 |
| Case 50 | 11 | 193,146     | 1,015,915   | 4 | 0 | 4 | 1 |
| Case 50 | 11 | 1,016,238   | 1,020,722   | 3 | 0 | 3 | 1 |
| Case 50 | 11 | 1,021,245   | 3,938,385   | 4 | 0 | 4 | 1 |
| Case 50 | 11 | 3,948,894   | 4,238,930   | 5 | 0 | 5 | 1 |
| Case 50 | 11 | 4,309,990   | 4,471,469   | 4 | 0 | 4 | 1 |
| Case 50 | 11 | 4,471,473   | 4,550,729   | 5 | 0 | 5 | 1 |
| Case 50 | 11 | 4,552,102   | 6,977,031   | 4 | 0 | 4 | 1 |
| Case 50 | 11 | 6,977,070   | 7,434,147   | 5 | 0 | 5 | 1 |
| Case 50 | 11 | 7,435,295   | 7,702,063   | 4 | 0 | 4 | 1 |
| Case 50 | 11 | 7,707,101   | 7,715,253   | 5 | 0 | 5 | 1 |
| Case 50 | 11 | 7,716,305   | 8,194,592   | 4 | 0 | 4 | 1 |
| Case 50 | 11 | 8,196,203   | 8,646,537   | 5 | 0 | 5 | 1 |
| Case 50 | 11 | 8,646,670   | 8,751,746   | 4 | 0 | 4 | 1 |
| Case 50 | 11 | 8,751,889   | 8,936,460   | 5 | 0 | 5 | 1 |
| Case 50 | 11 | 8,938,853   | 9,285,476   | 4 | 0 | 4 | 1 |



|         |    |             |             |   |   |   |   |
|---------|----|-------------|-------------|---|---|---|---|
| Case 50 | 11 | 9,286,536   | 11,343,477  | 5 | 0 | 5 | 1 |
| Case 50 | 11 | 11,345,579  | 11,398,285  | 4 | 0 | 4 | 1 |
| Case 50 | 11 | 11,398,347  | 17,409,572  | 5 | 0 | 5 | 1 |
| Case 50 | 11 | 17,409,602  | 17,548,878  | 4 | 0 | 4 | 1 |
| Case 50 | 11 | 17,549,409  | 17,775,799  | 5 | 0 | 5 | 1 |
| Case 50 | 11 | 17,790,227  | 17,882,589  | 4 | 0 | 4 | 1 |
| Case 50 | 11 | 17,883,386  | 18,097,481  | 5 | 0 | 5 | 1 |
| Case 50 | 11 | 18,102,014  | 18,424,407  | 4 | 0 | 4 | 1 |
| Case 50 | 11 | 18,425,256  | 18,632,984  | 5 | 0 | 5 | 1 |
| Case 50 | 11 | 18,633,897  | 18,804,934  | 4 | 0 | 4 | 1 |
| Case 50 | 11 | 18,808,355  | 19,203,165  | 5 | 0 | 5 | 1 |
| Case 50 | 11 | 19,204,263  | 19,477,447  | 4 | 0 | 4 | 1 |
| Case 50 | 11 | 19,481,773  | 19,952,664  | 5 | 0 | 5 | 1 |
| Case 50 | 11 | 19,953,089  | 20,202,134  | 4 | 0 | 4 | 1 |
| Case 50 | 11 | 20,205,484  | 20,623,090  | 5 | 0 | 5 | 1 |
| Case 50 | 11 | 20,623,171  | 20,681,572  | 4 | 0 | 4 | 1 |
| Case 50 | 11 | 20,690,377  | 20,976,029  | 5 | 0 | 5 | 1 |
| Case 50 | 11 | 20,978,633  | 34,753,747  | 3 | 0 | 3 | 1 |
| Case 50 | 11 | 34,757,447  | 34,895,100  | 5 | 0 | 5 | 1 |
| Case 50 | 11 | 34,902,135  | 50,325,741  | 3 | 0 | 3 | 1 |
| Case 50 | 11 | 50,332,064  | 50,697,498  | 2 | 0 | 2 | 1 |
| Case 50 | 11 | 51,095,992  | 51,591,253  | 3 | 0 | 3 | 1 |
| Case 50 | 11 | 54,794,237  | 67,797,710  | 3 | 0 | 3 | 1 |
| Case 50 | 11 | 67,798,156  | 116,423,307 | 4 | 0 | 4 | 1 |
| Case 50 | 11 | 116,426,640 | 131,366,138 | 3 | 0 | 3 | 1 |
| Case 50 | 11 | 131,368,641 | 132,314,476 | 2 | 0 | 2 | 1 |
| Case 50 | 11 | 132,314,776 | 134,934,063 | 3 | 0 | 3 | 1 |
| Case 50 | 12 | 191,619     | 7,126,079   | 2 | 0 | 2 | 1 |
| Case 50 | 12 | 7,162,598   | 14,582,840  | 3 | 0 | 3 | 1 |
| Case 50 | 12 | 14,587,301  | 14,593,902  | 1 | 0 | 1 | 0 |
| Case 50 | 12 | 14,607,142  | 34,375,830  | 3 | 0 | 3 | 1 |
| Case 50 | 12 | 34,387,092  | 34,853,011  | 2 | 0 | 2 | 1 |
| Case 50 | 12 | 37,876,400  | 38,416,139  | 2 | 0 | 2 | 1 |
| Case 50 | 12 | 38,424,982  | 99,830,822  | 3 | 0 | 3 | 1 |
| Case 50 | 12 | 99,837,070  | 99,896,332  | 2 | 0 | 2 | 1 |
| Case 50 | 12 | 99,898,304  | 99,957,020  | 1 | 0 | 1 | 0 |
| Case 50 | 12 | 99,960,522  | 133,810,935 | 3 | 0 | 3 | 1 |
| Case 50 | 13 | 19,058,717  | 19,523,899  | 4 | 0 | 4 | 1 |
| Case 50 | 13 | 19,527,206  | 20,749,239  | 5 | 0 | 5 | 1 |
| Case 50 | 13 | 20,750,106  | 20,763,710  | 4 | 0 | 4 | 1 |
| Case 50 | 13 | 20,767,957  | 21,728,945  | 5 | 0 | 5 | 1 |
| Case 50 | 13 | 21,729,226  | 21,751,164  | 4 | 0 | 4 | 1 |
| Case 50 | 13 | 21,751,209  | 25,659,182  | 5 | 0 | 5 | 1 |
| Case 50 | 13 | 25,660,186  | 25,786,848  | 4 | 0 | 4 | 1 |
| Case 50 | 13 | 25,788,586  | 29,532,501  | 5 | 0 | 5 | 1 |
| Case 50 | 13 | 29,533,453  | 29,618,468  | 4 | 0 | 4 | 1 |
| Case 50 | 13 | 29,623,790  | 30,471,289  | 5 | 0 | 5 | 1 |
| Case 50 | 13 | 30,475,332  | 30,620,776  | 4 | 0 | 4 | 1 |
| Case 50 | 13 | 30,621,058  | 36,048,667  | 5 | 0 | 5 | 1 |
| Case 50 | 13 | 36,049,456  | 36,194,422  | 4 | 0 | 4 | 1 |
| Case 50 | 13 | 36,195,311  | 52,518,387  | 5 | 0 | 5 | 1 |
| Case 50 | 13 | 52,520,502  | 52,646,153  | 4 | 0 | 4 | 1 |
| Case 50 | 13 | 52,646,203  | 98,926,466  | 5 | 0 | 5 | 1 |
| Case 50 | 13 | 98,927,468  | 99,237,843  | 4 | 0 | 4 | 1 |
| Case 50 | 13 | 99,238,580  | 99,358,411  | 5 | 0 | 5 | 1 |
| Case 50 | 13 | 99,358,478  | 99,384,561  | 4 | 0 | 4 | 1 |
| Case 50 | 13 | 99,384,598  | 105,738,103 | 5 | 0 | 5 | 1 |
| Case 50 | 13 | 105,738,427 | 106,098,389 | 6 | 0 | 6 | 1 |
| Case 50 | 13 | 106,110,385 | 106,583,540 | 5 | 0 | 5 | 1 |
| Case 50 | 13 | 106,586,890 | 115,103,529 | 4 | 0 | 4 | 1 |
| Case 50 | 14 | 19,280,733  | 22,536,550  | 3 | 0 | 3 | 1 |

|         |    |            |             |   |   |   |   |
|---------|----|------------|-------------|---|---|---|---|
| Case 50 | 14 | 22,538,661 | 22,957,171  | 4 | 0 | 4 | 1 |
| Case 50 | 14 | 22,957,488 | 40,913,662  | 3 | 0 | 3 | 1 |
| Case 50 | 14 | 40,917,243 | 40,950,184  | 2 | 0 | 2 | 1 |
| Case 50 | 14 | 40,957,195 | 43,763,264  | 3 | 0 | 3 | 1 |
| Case 50 | 14 | 43,773,651 | 43,836,526  | 1 | 0 | 1 | 0 |
| Case 50 | 14 | 43,854,103 | 45,431,637  | 3 | 0 | 3 | 1 |
| Case 50 | 14 | 45,431,698 | 45,473,265  | 2 | 0 | 2 | 1 |
| Case 50 | 14 | 45,473,543 | 45,540,866  | 1 | 0 | 1 | 0 |
| Case 50 | 14 | 45,542,529 | 45,604,404  | 2 | 0 | 2 | 1 |
| Case 50 | 14 | 45,605,287 | 45,606,290  | 3 | 0 | 3 | 1 |
| Case 50 | 14 | 45,606,301 | 45,693,307  | 1 | 0 | 1 | 0 |
| Case 50 | 14 | 45,693,341 | 107,287,663 | 3 | 0 | 3 | 1 |
| Case 50 | 15 | 20,034,919 | 22,368,901  | 3 | 0 | 3 | 1 |
| Case 50 | 15 | 22,368,918 | 22,427,966  | 1 | 0 | 1 | 0 |
| Case 50 | 15 | 22,652,330 | 22,750,305  | 3 | 0 | 3 | 1 |
| Case 50 | 15 | 22,753,733 | 41,145,816  | 4 | 0 | 4 | 1 |
| Case 50 | 15 | 41,145,919 | 41,188,287  | 3 | 0 | 3 | 1 |
| Case 50 | 15 | 41,190,055 | 102,461,162 | 4 | 0 | 4 | 1 |
| Case 50 | 16 | 88,165     | 705,360     | 2 | 0 | 2 | 1 |
| Case 50 | 16 | 705,587    | 711,669     | 1 | 0 | 1 | 0 |
| Case 50 | 16 | 711,698    | 825,663     | 2 | 0 | 2 | 1 |
| Case 50 | 16 | 828,760    | 830,250     | 1 | 0 | 1 | 0 |
| Case 50 | 16 | 830,612    | 1,271,987   | 2 | 0 | 2 | 1 |
| Case 50 | 16 | 1,272,038  | 1,273,549   | 1 | 0 | 1 | 0 |
| Case 50 | 16 | 1,273,562  | 1,537,458   | 2 | 0 | 2 | 1 |
| Case 50 | 16 | 1,537,647  | 1,537,874   | 1 | 0 | 1 | 0 |
| Case 50 | 16 | 1,537,884  | 1,841,271   | 2 | 0 | 2 | 1 |
| Case 50 | 16 | 1,841,389  | 1,842,516   | 1 | 0 | 1 | 0 |
| Case 50 | 16 | 1,849,916  | 1,889,645   | 2 | 0 | 2 | 1 |
| Case 50 | 16 | 1,889,714  | 1,934,183   | 1 | 0 | 1 | 0 |
| Case 50 | 16 | 1,943,418  | 2,814,940   | 2 | 0 | 2 | 1 |
| Case 50 | 16 | 2,814,950  | 2,816,861   | 3 | 0 | 3 | 1 |
| Case 50 | 16 | 2,816,885  | 3,166,547   | 2 | 0 | 2 | 1 |
| Case 50 | 16 | 3,170,210  | 3,194,616   | 1 | 0 | 1 | 0 |
| Case 50 | 16 | 3,194,830  | 6,272,049   | 2 | 0 | 2 | 1 |
| Case 50 | 16 | 6,275,531  | 6,328,922   | 0 | 0 | 0 | 0 |
| Case 50 | 16 | 6,336,737  | 6,412,639   | 2 | 0 | 2 | 1 |
| Case 50 | 16 | 6,412,803  | 6,462,231   | 0 | 0 | 0 | 0 |
| Case 50 | 16 | 6,471,647  | 6,678,811   | 2 | 0 | 2 | 1 |
| Case 50 | 16 | 6,681,184  | 6,719,893   | 0 | 0 | 0 | 0 |
| Case 50 | 16 | 6,721,013  | 6,876,458   | 2 | 0 | 2 | 1 |
| Case 50 | 16 | 6,876,984  | 6,899,804   | 1 | 0 | 1 | 0 |
| Case 50 | 16 | 6,899,890  | 6,899,890   | 2 | 0 | 2 | 1 |
| Case 50 | 16 | 6,900,547  | 6,970,380   | 0 | 0 | 0 | 0 |
| Case 50 | 16 | 6,972,216  | 7,021,004   | 2 | 0 | 2 | 1 |
| Case 50 | 16 | 7,030,309  | 7,282,505   | 0 | 0 | 0 | 0 |
| Case 50 | 16 | 7,283,180  | 10,499,331  | 2 | 0 | 2 | 1 |
| Case 50 | 16 | 10,524,165 | 10,554,207  | 1 | 0 | 1 | 0 |
| Case 50 | 16 | 10,554,794 | 11,864,032  | 2 | 0 | 2 | 1 |
| Case 50 | 16 | 11,864,657 | 11,872,400  | 1 | 0 | 1 | 0 |
| Case 50 | 16 | 11,873,156 | 17,153,086  | 2 | 0 | 2 | 1 |
| Case 50 | 16 | 17,157,228 | 30,435,651  | 3 | 0 | 3 | 1 |
| Case 50 | 16 | 30,438,930 | 30,803,299  | 4 | 0 | 4 | 1 |
| Case 50 | 16 | 30,809,063 | 35,285,582  | 3 | 0 | 3 | 1 |
| Case 50 | 16 | 46,450,037 | 70,843,712  | 3 | 0 | 3 | 1 |
| Case 50 | 16 | 70,843,909 | 71,196,543  | 3 | 1 | 4 | 0 |
| Case 50 | 16 | 71,206,836 | 78,546,225  | 3 | 0 | 3 | 1 |
| Case 50 | 16 | 78,548,574 | 78,631,794  | 0 | 0 | 0 | 0 |
| Case 50 | 16 | 78,635,193 | 78,665,808  | 3 | 0 | 3 | 1 |
| Case 50 | 16 | 78,668,208 | 78,693,758  | 0 | 0 | 0 | 0 |
| Case 50 | 16 | 78,696,257 | 78,849,375  | 3 | 0 | 3 | 1 |

|         |    |            |            |   |   |   |   |
|---------|----|------------|------------|---|---|---|---|
| Case 50 | 16 | 78,854,228 | 78,857,596 | 1 | 0 | 1 | 0 |
| Case 50 | 16 | 78,858,359 | 78,858,359 | 2 | 0 | 2 | 1 |
| Case 50 | 16 | 78,859,405 | 78,903,101 | 0 | 0 | 0 | 0 |
| Case 50 | 16 | 78,911,101 | 81,095,072 | 3 | 0 | 3 | 1 |
| Case 50 | 16 | 81,095,077 | 81,095,091 | 1 | 0 | 1 | 0 |
| Case 50 | 16 | 81,095,100 | 90,274,695 | 3 | 0 | 3 | 1 |
| Case 50 | 17 | 11,885     | 21,785,239 | 3 | 0 | 3 | 1 |
| Case 50 | 17 | 21,798,506 | 22,242,355 | 2 | 2 | 4 | 0 |
| Case 50 | 17 | 25,268,142 | 25,335,214 | 2 | 2 | 4 | 0 |
| Case 50 | 17 | 25,346,692 | 28,075,046 | 3 | 1 | 4 | 0 |
| Case 50 | 17 | 28,104,306 | 29,114,463 | 4 | 1 | 5 | 0 |
| Case 50 | 17 | 29,120,588 | 29,147,164 | 3 | 1 | 4 | 0 |
| Case 50 | 17 | 29,158,515 | 70,346,967 | 2 | 1 | 3 | 0 |
| Case 50 | 17 | 70,355,300 | 70,445,988 | 3 | 1 | 4 | 0 |
| Case 50 | 17 | 70,451,829 | 81,060,040 | 2 | 1 | 3 | 0 |
| Case 50 | 18 | 87,505     | 15,375,878 | 3 | 0 | 3 | 1 |
| Case 50 | 18 | 18,520,354 | 47,818,688 | 3 | 0 | 3 | 1 |
| Case 50 | 18 | 47,819,568 | 48,946,926 | 2 | 0 | 2 | 1 |
| Case 50 | 18 | 48,948,604 | 78,015,180 | 3 | 0 | 3 | 1 |
| Case 50 | 19 | 260,912    | 288,738    | 3 | 0 | 3 | 1 |
| Case 50 | 19 | 292,082    | 504,948    | 2 | 2 | 4 | 0 |
| Case 50 | 19 | 506,712    | 1,099,701  | 3 | 0 | 3 | 1 |
| Case 50 | 19 | 1,101,992  | 1,127,876  | 2 | 0 | 2 | 1 |
| Case 50 | 19 | 1,132,637  | 12,059,352 | 3 | 0 | 3 | 1 |
| Case 50 | 19 | 12,059,467 | 12,084,508 | 2 | 0 | 2 | 1 |
| Case 50 | 19 | 12,088,221 | 20,809,176 | 3 | 0 | 3 | 1 |
| Case 50 | 19 | 20,826,692 | 20,835,290 | 2 | 2 | 4 | 0 |
| Case 50 | 19 | 20,842,765 | 21,606,230 | 3 | 2 | 5 | 0 |
| Case 50 | 19 | 21,607,043 | 24,629,285 | 2 | 2 | 4 | 0 |
| Case 50 | 19 | 27,732,159 | 27,801,814 | 2 | 2 | 4 | 0 |
| Case 50 | 19 | 27,828,664 | 30,007,635 | 3 | 2 | 5 | 0 |
| Case 50 | 19 | 30,024,773 | 31,342,912 | 4 | 2 | 6 | 0 |
| Case 50 | 19 | 31,350,366 | 32,435,348 | 3 | 2 | 5 | 0 |
| Case 50 | 19 | 32,439,327 | 32,604,064 | 4 | 0 | 4 | 1 |
| Case 50 | 19 | 32,604,570 | 32,605,173 | 3 | 0 | 3 | 1 |
| Case 50 | 19 | 32,608,345 | 32,608,345 | 2 | 2 | 4 | 0 |
| Case 50 | 19 | 32,611,716 | 36,825,458 | 3 | 2 | 5 | 0 |
| Case 50 | 19 | 36,828,217 | 37,634,291 | 3 | 3 | 6 | 0 |
| Case 50 | 19 | 37,639,701 | 54,722,230 | 4 | 0 | 4 | 1 |
| Case 50 | 19 | 54,722,668 | 54,722,700 | 3 | 0 | 3 | 1 |
| Case 50 | 19 | 54,731,679 | 54,740,720 | 0 | 0 | 0 | 0 |
| Case 50 | 19 | 54,742,861 | 54,749,011 | 3 | 0 | 3 | 1 |
| Case 50 | 19 | 54,753,543 | 58,426,609 | 4 | 0 | 4 | 1 |
| Case 50 | 19 | 58,428,153 | 58,453,958 | 3 | 0 | 3 | 1 |
| Case 50 | 19 | 58,453,986 | 59,097,160 | 4 | 0 | 4 | 1 |
| Case 50 | 20 | 63,244     | 76,978     | 2 | 2 | 4 | 0 |
| Case 50 | 20 | 80,655     | 168,241    | 3 | 2 | 5 | 0 |
| Case 50 | 20 | 168,558    | 3,565,356  | 2 | 2 | 4 | 0 |
| Case 50 | 20 | 3,571,908  | 3,678,669  | 3 | 2 | 5 | 0 |
| Case 50 | 20 | 3,678,749  | 4,263,591  | 2 | 2 | 4 | 0 |
| Case 50 | 20 | 4,272,499  | 4,378,871  | 3 | 2 | 5 | 0 |
| Case 50 | 20 | 4,379,086  | 4,771,233  | 2 | 2 | 4 | 0 |
| Case 50 | 20 | 4,773,214  | 7,262,606  | 3 | 1 | 4 | 0 |
| Case 50 | 20 | 7,271,214  | 7,283,182  | 2 | 2 | 4 | 0 |
| Case 50 | 20 | 7,288,480  | 10,102,530 | 3 | 2 | 5 | 0 |
| Case 50 | 20 | 10,106,429 | 10,277,621 | 2 | 2 | 4 | 0 |
| Case 50 | 20 | 10,279,560 | 10,562,658 | 3 | 2 | 5 | 0 |
| Case 50 | 20 | 10,575,952 | 10,653,654 | 2 | 2 | 4 | 0 |
| Case 50 | 20 | 10,656,087 | 14,169,136 | 3 | 2 | 5 | 0 |
| Case 50 | 20 | 14,172,443 | 14,671,202 | 2 | 2 | 4 | 0 |
| Case 50 | 20 | 14,672,177 | 14,702,391 | 3 | 0 | 3 | 1 |

|         |    |            |            |   |   |   |   |
|---------|----|------------|------------|---|---|---|---|
| Case 50 | 20 | 14,705,888 | 14,853,050 | 2 | 0 | 2 | 1 |
| Case 50 | 20 | 14,858,910 | 14,923,390 | 0 | 0 | 0 | 0 |
| Case 50 | 20 | 14,925,275 | 14,965,823 | 2 | 0 | 2 | 1 |
| Case 50 | 20 | 14,968,542 | 15,031,044 | 1 | 0 | 1 | 0 |
| Case 50 | 20 | 15,037,065 | 15,161,670 | 2 | 0 | 2 | 1 |
| Case 50 | 20 | 15,163,265 | 15,219,500 | 3 | 0 | 3 | 1 |
| Case 50 | 20 | 15,223,632 | 15,526,582 | 3 | 1 | 4 | 0 |
| Case 50 | 20 | 15,527,445 | 15,539,122 | 2 | 2 | 4 | 0 |
| Case 50 | 20 | 15,543,368 | 16,337,046 | 3 | 2 | 5 | 0 |
| Case 50 | 20 | 16,347,642 | 16,568,129 | 2 | 2 | 4 | 0 |
| Case 50 | 20 | 16,570,934 | 17,631,573 | 3 | 2 | 5 | 0 |
| Case 50 | 20 | 17,633,683 | 17,773,838 | 2 | 2 | 4 | 0 |
| Case 50 | 20 | 17,774,572 | 17,883,295 | 3 | 2 | 5 | 0 |
| Case 50 | 20 | 17,883,653 | 18,022,362 | 2 | 2 | 4 | 0 |
| Case 50 | 20 | 18,024,047 | 18,491,675 | 3 | 2 | 5 | 0 |
| Case 50 | 20 | 18,491,700 | 19,063,431 | 2 | 2 | 4 | 0 |
| Case 50 | 20 | 19,068,121 | 19,414,399 | 3 | 2 | 5 | 0 |
| Case 50 | 20 | 19,416,767 | 19,668,211 | 2 | 2 | 4 | 0 |
| Case 50 | 20 | 19,670,344 | 19,818,640 | 3 | 2 | 5 | 0 |
| Case 50 | 20 | 19,820,703 | 20,033,172 | 2 | 2 | 4 | 0 |
| Case 50 | 20 | 20,033,198 | 21,028,015 | 3 | 2 | 5 | 0 |
| Case 50 | 20 | 21,035,212 | 21,195,214 | 2 | 2 | 4 | 0 |
| Case 50 | 20 | 21,203,859 | 23,028,659 | 3 | 2 | 5 | 0 |
| Case 50 | 20 | 23,028,686 | 26,293,985 | 2 | 2 | 4 | 0 |
| Case 50 | 20 | 29,425,357 | 34,075,998 | 2 | 2 | 4 | 0 |
| Case 50 | 20 | 34,078,517 | 34,092,739 | 3 | 2 | 5 | 0 |
| Case 50 | 20 | 34,092,808 | 37,001,771 | 2 | 2 | 4 | 0 |
| Case 50 | 20 | 37,002,589 | 37,202,908 | 3 | 2 | 5 | 0 |
| Case 50 | 20 | 37,203,537 | 38,582,345 | 2 | 2 | 4 | 0 |
| Case 50 | 20 | 38,582,665 | 39,128,578 | 3 | 2 | 5 | 0 |
| Case 50 | 20 | 39,131,200 | 39,977,512 | 2 | 2 | 4 | 0 |
| Case 50 | 20 | 39,977,742 | 40,045,231 | 3 | 2 | 5 | 0 |
| Case 50 | 20 | 40,045,257 | 43,561,803 | 2 | 2 | 4 | 0 |
| Case 50 | 20 | 43,565,288 | 43,836,016 | 3 | 2 | 5 | 0 |
| Case 50 | 20 | 43,836,062 | 47,648,590 | 2 | 2 | 4 | 0 |
| Case 50 | 20 | 47,652,338 | 47,713,932 | 3 | 2 | 5 | 0 |
| Case 50 | 20 | 47,716,451 | 50,445,716 | 2 | 2 | 4 | 0 |
| Case 50 | 20 | 50,446,692 | 51,850,594 | 3 | 2 | 5 | 0 |
| Case 50 | 20 | 51,851,473 | 52,232,673 | 2 | 2 | 4 | 0 |
| Case 50 | 20 | 52,240,212 | 52,771,261 | 3 | 2 | 5 | 0 |
| Case 50 | 20 | 52,772,741 | 52,814,015 | 2 | 2 | 4 | 0 |
| Case 50 | 20 | 52,814,510 | 54,452,716 | 3 | 2 | 5 | 0 |
| Case 50 | 20 | 54,457,983 | 58,032,850 | 2 | 2 | 4 | 0 |
| Case 50 | 20 | 58,038,808 | 58,118,612 | 3 | 2 | 5 | 0 |
| Case 50 | 20 | 58,123,049 | 58,436,963 | 2 | 2 | 4 | 0 |
| Case 50 | 20 | 58,440,630 | 58,496,439 | 3 | 2 | 5 | 0 |
| Case 50 | 20 | 58,500,453 | 62,948,788 | 2 | 2 | 4 | 0 |
| Case 50 | 21 | 10,827,533 | 10,971,337 | 3 | 1 | 4 | 0 |
| Case 50 | 21 | 14,368,320 | 14,368,320 | 3 | 1 | 4 | 0 |
| Case 50 | 21 | 14,613,203 | 20,722,633 | 2 | 1 | 3 | 0 |
| Case 50 | 21 | 20,723,448 | 20,754,462 | 1 | 1 | 2 | 0 |
| Case 50 | 21 | 20,759,787 | 21,881,155 | 2 | 1 | 3 | 0 |
| Case 50 | 21 | 21,884,955 | 21,991,832 | 1 | 1 | 2 | 0 |
| Case 50 | 21 | 21,993,743 | 23,862,316 | 2 | 1 | 3 | 0 |
| Case 50 | 21 | 23,873,434 | 23,984,543 | 1 | 1 | 2 | 0 |
| Case 50 | 21 | 23,986,788 | 24,696,254 | 2 | 1 | 3 | 0 |
| Case 50 | 21 | 24,696,533 | 24,729,963 | 1 | 1 | 2 | 0 |
| Case 50 | 21 | 24,735,523 | 43,967,126 | 2 | 1 | 3 | 0 |
| Case 50 | 21 | 43,970,875 | 43,984,848 | 3 | 1 | 4 | 0 |
| Case 50 | 21 | 43,984,901 | 48,100,155 | 2 | 1 | 3 | 0 |
| Case 50 | 22 | 16,114,244 | 51,195,728 | 4 | 0 | 4 | 1 |

|         |   |             |             |   |   |   |   |
|---------|---|-------------|-------------|---|---|---|---|
| Case 52 | 1 | 82,154      | 120,111,002 | 1 | 0 | 1 | 0 |
| Case 52 | 1 | 120,115,384 | 120,145,883 | 4 | 0 | 4 | 1 |
| Case 52 | 1 | 120,150,949 | 121,346,616 | 1 | 0 | 1 | 0 |
| Case 52 | 1 | 142,649,718 | 177,558,449 | 1 | 0 | 1 | 0 |
| Case 52 | 1 | 177,560,435 | 177,783,670 | 1 | 1 | 2 | 0 |
| Case 52 | 1 | 177,784,137 | 249,218,992 | 1 | 0 | 1 | 0 |
| Case 52 | 2 | 18,674      | 92,081,640  | 1 | 0 | 1 | 0 |
| Case 52 | 2 | 95,429,424  | 243,048,760 | 1 | 0 | 1 | 0 |
| Case 52 | 3 | 61,495      | 90,442,925  | 1 | 0 | 1 | 0 |
| Case 52 | 3 | 93,537,290  | 197,838,262 | 1 | 0 | 1 | 0 |
| Case 52 | 4 | 71,566      | 8,872,977   | 1 | 0 | 1 | 0 |
| Case 52 | 4 | 9,371,116   | 9,470,222   | 4 | 0 | 4 | 1 |
| Case 52 | 4 | 9,485,300   | 10,105,567  | 1 | 0 | 1 | 0 |
| Case 52 | 4 | 10,105,739  | 10,286,082  | 1 | 1 | 2 | 0 |
| Case 52 | 4 | 10,296,298  | 49,620,898  | 1 | 0 | 1 | 0 |
| Case 52 | 4 | 52,697,856  | 167,079,178 | 1 | 0 | 1 | 0 |
| Case 52 | 4 | 167,079,944 | 167,540,460 | 2 | 0 | 2 | 1 |
| Case 52 | 4 | 167,547,429 | 169,394,314 | 1 | 0 | 1 | 0 |
| Case 52 | 4 | 169,394,695 | 170,190,188 | 1 | 1 | 2 | 0 |
| Case 52 | 4 | 170,198,039 | 170,737,119 | 1 | 0 | 1 | 0 |
| Case 52 | 4 | 170,740,266 | 171,654,737 | 1 | 1 | 2 | 0 |
| Case 52 | 4 | 171,663,745 | 171,673,765 | 1 | 0 | 1 | 0 |
| Case 52 | 4 | 171,680,223 | 172,406,840 | 2 | 0 | 2 | 1 |
| Case 52 | 4 | 172,416,533 | 190,963,766 | 1 | 0 | 1 | 0 |
| Case 52 | 5 | 38,139      | 46,399,093  | 1 | 0 | 1 | 0 |
| Case 52 | 5 | 49,457,282  | 180,431,750 | 1 | 0 | 1 | 0 |
| Case 52 | 5 | 180,432,024 | 180,527,455 | 4 | 0 | 4 | 1 |
| Case 52 | 5 | 180,532,990 | 180,693,127 | 1 | 0 | 1 | 0 |
| Case 52 | 6 | 108,666     | 33,049,384  | 1 | 0 | 1 | 0 |
| Case 52 | 6 | 33,050,279  | 33,057,176  | 1 | 1 | 2 | 0 |
| Case 52 | 6 | 33,057,198  | 58,752,089  | 1 | 0 | 1 | 0 |
| Case 52 | 6 | 61,891,118  | 162,571,263 | 1 | 0 | 1 | 0 |
| Case 52 | 6 | 162,577,258 | 162,632,171 | 0 | 0 | 0 | 0 |
| Case 52 | 6 | 162,633,118 | 170,980,171 | 1 | 0 | 1 | 0 |
| Case 52 | 7 | 44,935      | 9,944,175   | 1 | 0 | 1 | 0 |
| Case 52 | 7 | 9,944,520   | 10,093,255  | 2 | 0 | 2 | 1 |
| Case 52 | 7 | 10,093,480  | 10,327,371  | 1 | 0 | 1 | 0 |
| Case 52 | 7 | 10,337,280  | 10,904,755  | 2 | 0 | 2 | 1 |
| Case 52 | 7 | 10,910,808  | 16,808,472  | 1 | 0 | 1 | 0 |
| Case 52 | 7 | 16,811,167  | 16,900,123  | 1 | 1 | 2 | 0 |
| Case 52 | 7 | 16,900,195  | 17,514,416  | 1 | 0 | 1 | 0 |
| Case 52 | 7 | 17,514,653  | 17,786,633  | 2 | 0 | 2 | 1 |
| Case 52 | 7 | 17,794,682  | 31,692,357  | 1 | 0 | 1 | 0 |
| Case 52 | 7 | 31,692,409  | 31,869,225  | 1 | 1 | 2 | 0 |
| Case 52 | 7 | 31,869,408  | 38,292,663  | 1 | 0 | 1 | 0 |
| Case 52 | 7 | 38,297,145  | 38,383,243  | 2 | 0 | 2 | 1 |
| Case 52 | 7 | 38,385,938  | 46,066,152  | 1 | 0 | 1 | 0 |
| Case 52 | 7 | 46,066,786  | 46,226,952  | 1 | 1 | 2 | 0 |
| Case 52 | 7 | 46,233,664  | 58,019,061  | 1 | 0 | 1 | 0 |
| Case 52 | 7 | 61,056,053  | 66,954,325  | 1 | 0 | 1 | 0 |
| Case 52 | 7 | 66,954,848  | 67,093,692  | 1 | 1 | 2 | 0 |
| Case 52 | 7 | 67,093,906  | 80,599,142  | 1 | 0 | 1 | 0 |
| Case 52 | 7 | 80,599,357  | 80,729,400  | 2 | 0 | 2 | 1 |
| Case 52 | 7 | 80,739,951  | 81,923,913  | 1 | 0 | 1 | 0 |
| Case 52 | 7 | 81,924,035  | 82,193,853  | 2 | 0 | 2 | 1 |
| Case 52 | 7 | 82,193,993  | 111,629,366 | 1 | 0 | 1 | 0 |
| Case 52 | 7 | 111,630,024 | 111,782,891 | 2 | 0 | 2 | 1 |
| Case 52 | 7 | 111,783,764 | 136,715,254 | 1 | 0 | 1 | 0 |
| Case 52 | 7 | 136,715,603 | 136,933,042 | 2 | 0 | 2 | 1 |
| Case 52 | 7 | 136,935,459 | 159,119,486 | 1 | 0 | 1 | 0 |
| Case 52 | 8 | 164,984     | 4,574,531   | 1 | 0 | 1 | 0 |

|         |   |            |            |   |   |   |   |
|---------|---|------------|------------|---|---|---|---|
| Case 52 | 8 | 4,577,681  | 4,835,344  | 2 | 0 | 2 | 1 |
| Case 52 | 8 | 4,838,022  | 5,939,849  | 1 | 0 | 1 | 0 |
| Case 52 | 8 | 5,940,561  | 6,945,876  | 2 | 0 | 2 | 1 |
| Case 52 | 8 | 6,974,050  | 8,234,192  | 1 | 0 | 1 | 0 |
| Case 52 | 8 | 8,234,219  | 9,197,585  | 2 | 0 | 2 | 1 |
| Case 52 | 8 | 9,197,622  | 10,091,194 | 1 | 0 | 1 | 0 |
| Case 52 | 8 | 10,093,228 | 10,464,692 | 2 | 0 | 2 | 1 |
| Case 52 | 8 | 10,464,706 | 13,259,100 | 1 | 0 | 1 | 0 |
| Case 52 | 8 | 13,259,865 | 14,494,946 | 2 | 0 | 2 | 1 |
| Case 52 | 8 | 14,500,655 | 15,284,720 | 1 | 0 | 1 | 0 |
| Case 52 | 8 | 15,289,066 | 15,644,559 | 2 | 0 | 2 | 1 |
| Case 52 | 8 | 15,644,927 | 18,246,664 | 1 | 0 | 1 | 0 |
| Case 52 | 8 | 18,246,696 | 18,652,812 | 2 | 0 | 2 | 1 |
| Case 52 | 8 | 18,653,742 | 18,853,687 | 1 | 0 | 1 | 0 |
| Case 52 | 8 | 18,853,940 | 18,962,643 | 1 | 1 | 2 | 0 |
| Case 52 | 8 | 18,963,623 | 20,857,659 | 1 | 0 | 1 | 0 |
| Case 52 | 8 | 20,858,217 | 21,051,235 | 1 | 1 | 2 | 0 |
| Case 52 | 8 | 21,053,295 | 21,473,209 | 1 | 0 | 1 | 0 |
| Case 52 | 8 | 21,474,049 | 21,699,960 | 1 | 1 | 2 | 0 |
| Case 52 | 8 | 21,701,375 | 23,439,308 | 1 | 0 | 1 | 0 |
| Case 52 | 8 | 23,440,655 | 24,772,143 | 1 | 1 | 2 | 0 |
| Case 52 | 8 | 24,772,189 | 29,300,685 | 1 | 0 | 1 | 0 |
| Case 52 | 8 | 29,303,526 | 29,894,450 | 1 | 1 | 2 | 0 |
| Case 52 | 8 | 29,905,051 | 31,258,539 | 1 | 0 | 1 | 0 |
| Case 52 | 8 | 31,261,439 | 31,936,552 | 1 | 1 | 2 | 0 |
| Case 52 | 8 | 31,941,211 | 32,520,472 | 1 | 0 | 1 | 0 |
| Case 52 | 8 | 32,524,451 | 32,615,098 | 1 | 1 | 2 | 0 |
| Case 52 | 8 | 32,617,714 | 34,004,175 | 1 | 0 | 1 | 0 |
| Case 52 | 8 | 34,005,746 | 34,631,702 | 1 | 1 | 2 | 0 |
| Case 52 | 8 | 34,636,144 | 36,827,102 | 1 | 0 | 1 | 0 |
| Case 52 | 8 | 36,834,333 | 37,462,419 | 1 | 1 | 2 | 0 |
| Case 52 | 8 | 37,469,049 | 43,791,691 | 1 | 0 | 1 | 0 |
| Case 52 | 8 | 46,886,735 | 51,483,551 | 1 | 0 | 1 | 0 |
| Case 52 | 8 | 51,486,840 | 52,226,018 | 1 | 1 | 2 | 0 |
| Case 52 | 8 | 52,231,952 | 57,926,726 | 1 | 0 | 1 | 0 |
| Case 52 | 8 | 57,942,358 | 59,884,719 | 1 | 1 | 2 | 0 |
| Case 52 | 8 | 59,887,499 | 60,215,990 | 1 | 0 | 1 | 0 |
| Case 52 | 8 | 60,218,207 | 63,848,556 | 1 | 1 | 2 | 0 |
| Case 52 | 8 | 63,857,960 | 64,148,307 | 1 | 0 | 1 | 0 |
| Case 52 | 8 | 64,168,483 | 65,387,467 | 1 | 1 | 2 | 0 |
| Case 52 | 8 | 65,392,030 | 65,617,660 | 1 | 0 | 1 | 0 |
| Case 52 | 8 | 65,618,273 | 66,392,336 | 2 | 0 | 2 | 1 |
| Case 52 | 8 | 66,394,344 | 69,552,619 | 1 | 0 | 1 | 0 |
| Case 52 | 8 | 69,552,683 | 70,446,384 | 1 | 1 | 2 | 0 |
| Case 52 | 8 | 70,447,058 | 72,684,401 | 1 | 0 | 1 | 0 |
| Case 52 | 8 | 72,685,824 | 73,663,170 | 1 | 1 | 2 | 0 |
| Case 52 | 8 | 73,665,740 | 75,099,653 | 1 | 0 | 1 | 0 |
| Case 52 | 8 | 75,101,074 | 75,916,686 | 1 | 1 | 2 | 0 |
| Case 52 | 8 | 75,922,589 | 77,287,631 | 1 | 0 | 1 | 0 |
| Case 52 | 8 | 77,297,117 | 77,760,070 | 1 | 1 | 2 | 0 |
| Case 52 | 8 | 77,760,079 | 79,664,483 | 1 | 0 | 1 | 0 |
| Case 52 | 8 | 79,670,387 | 80,783,998 | 1 | 1 | 2 | 0 |
| Case 52 | 8 | 80,785,374 | 88,930,662 | 1 | 0 | 1 | 0 |
| Case 52 | 8 | 88,934,441 | 89,232,797 | 1 | 1 | 2 | 0 |
| Case 52 | 8 | 89,246,009 | 90,158,554 | 1 | 0 | 1 | 0 |
| Case 52 | 8 | 90,161,392 | 90,881,937 | 1 | 1 | 2 | 0 |
| Case 52 | 8 | 90,886,015 | 91,214,786 | 1 | 0 | 1 | 0 |
| Case 52 | 8 | 91,222,654 | 92,896,491 | 1 | 1 | 2 | 0 |
| Case 52 | 8 | 92,909,705 | 94,170,598 | 1 | 0 | 1 | 0 |
| Case 52 | 8 | 94,174,117 | 95,262,253 | 1 | 1 | 2 | 0 |
| Case 52 | 8 | 95,262,626 | 96,141,850 | 1 | 0 | 1 | 0 |

|         |   |             |             |   |   |   |   |
|---------|---|-------------|-------------|---|---|---|---|
| Case 52 | 8 | 96,145,419  | 96,934,769  | 2 | 0 | 2 | 1 |
| Case 52 | 8 | 96,935,794  | 96,988,158  | 1 | 0 | 1 | 0 |
| Case 52 | 8 | 96,988,274  | 97,234,255  | 1 | 1 | 2 | 0 |
| Case 52 | 8 | 97,244,011  | 97,510,132  | 1 | 0 | 1 | 0 |
| Case 52 | 8 | 97,512,221  | 97,614,661  | 1 | 1 | 2 | 0 |
| Case 52 | 8 | 97,615,235  | 102,678,972 | 1 | 0 | 1 | 0 |
| Case 52 | 8 | 102,679,216 | 103,200,036 | 1 | 1 | 2 | 0 |
| Case 52 | 8 | 103,200,321 | 104,121,210 | 1 | 0 | 1 | 0 |
| Case 52 | 8 | 104,121,274 | 104,287,845 | 1 | 1 | 2 | 0 |
| Case 52 | 8 | 104,290,148 | 105,633,850 | 1 | 0 | 1 | 0 |
| Case 52 | 8 | 105,635,003 | 106,113,818 | 1 | 1 | 2 | 0 |
| Case 52 | 8 | 106,115,172 | 107,392,965 | 1 | 0 | 1 | 0 |
| Case 52 | 8 | 107,395,988 | 108,403,482 | 2 | 0 | 2 | 1 |
| Case 52 | 8 | 108,407,313 | 109,395,713 | 1 | 0 | 1 | 0 |
| Case 52 | 8 | 109,396,626 | 110,376,861 | 1 | 1 | 2 | 0 |
| Case 52 | 8 | 110,380,421 | 114,730,266 | 1 | 0 | 1 | 0 |
| Case 52 | 8 | 114,731,745 | 115,097,202 | 1 | 1 | 2 | 0 |
| Case 52 | 8 | 115,101,787 | 115,976,488 | 1 | 0 | 1 | 0 |
| Case 52 | 8 | 115,983,884 | 117,073,654 | 1 | 1 | 2 | 0 |
| Case 52 | 8 | 117,077,882 | 117,578,764 | 1 | 0 | 1 | 0 |
| Case 52 | 8 | 117,584,829 | 117,635,577 | 2 | 0 | 2 | 1 |
| Case 52 | 8 | 117,636,863 | 117,673,915 | 1 | 0 | 1 | 0 |
| Case 52 | 8 | 117,681,031 | 118,076,115 | 1 | 1 | 2 | 0 |
| Case 52 | 8 | 118,078,696 | 118,847,730 | 1 | 0 | 1 | 0 |
| Case 52 | 8 | 118,847,781 | 120,020,863 | 1 | 1 | 2 | 0 |
| Case 52 | 8 | 120,022,549 | 121,715,079 | 1 | 0 | 1 | 0 |
| Case 52 | 8 | 121,718,491 | 123,938,552 | 1 | 1 | 2 | 0 |
| Case 52 | 8 | 123,938,787 | 124,473,238 | 1 | 0 | 1 | 0 |
| Case 52 | 8 | 124,473,894 | 124,718,333 | 1 | 1 | 2 | 0 |
| Case 52 | 8 | 124,723,631 | 125,681,849 | 1 | 0 | 1 | 0 |
| Case 52 | 8 | 125,682,525 | 125,987,907 | 1 | 1 | 2 | 0 |
| Case 52 | 8 | 125,988,688 | 126,419,188 | 1 | 0 | 1 | 0 |
| Case 52 | 8 | 126,426,386 | 126,763,557 | 4 | 0 | 4 | 1 |
| Case 52 | 8 | 126,765,322 | 126,799,011 | 1 | 0 | 1 | 0 |
| Case 52 | 8 | 126,802,262 | 127,366,340 | 2 | 0 | 2 | 1 |
| Case 52 | 8 | 127,368,518 | 127,664,807 | 4 | 0 | 4 | 1 |
| Case 52 | 8 | 127,665,272 | 128,114,710 | 6 | 0 | 6 | 1 |
| Case 52 | 8 | 128,116,500 | 129,343,201 | 4 | 0 | 4 | 1 |
| Case 52 | 8 | 129,351,485 | 129,351,485 | 1 | 0 | 1 | 0 |
| Case 52 | 8 | 129,371,875 | 130,250,443 | 1 | 1 | 2 | 0 |
| Case 52 | 8 | 130,251,745 | 132,132,160 | 1 | 0 | 1 | 0 |
| Case 52 | 8 | 132,144,401 | 133,573,057 | 1 | 1 | 2 | 0 |
| Case 52 | 8 | 133,573,931 | 134,071,833 | 1 | 0 | 1 | 0 |
| Case 52 | 8 | 134,072,272 | 134,948,065 | 1 | 1 | 2 | 0 |
| Case 52 | 8 | 134,953,726 | 135,847,101 | 1 | 0 | 1 | 0 |
| Case 52 | 8 | 135,847,442 | 137,013,447 | 1 | 1 | 2 | 0 |
| Case 52 | 8 | 137,016,128 | 137,351,689 | 1 | 0 | 1 | 0 |
| Case 52 | 8 | 137,353,807 | 138,222,987 | 1 | 1 | 2 | 0 |
| Case 52 | 8 | 138,223,632 | 138,562,411 | 1 | 0 | 1 | 0 |
| Case 52 | 8 | 138,567,221 | 138,915,665 | 1 | 1 | 2 | 0 |
| Case 52 | 8 | 138,915,718 | 139,165,139 | 1 | 0 | 1 | 0 |
| Case 52 | 8 | 139,165,177 | 139,282,109 | 1 | 1 | 2 | 0 |
| Case 52 | 8 | 139,286,075 | 140,337,281 | 1 | 0 | 1 | 0 |
| Case 52 | 8 | 140,340,558 | 141,104,817 | 1 | 1 | 2 | 0 |
| Case 52 | 8 | 141,105,774 | 142,566,426 | 1 | 0 | 1 | 0 |
| Case 52 | 8 | 142,566,820 | 143,071,927 | 1 | 1 | 2 | 0 |
| Case 52 | 8 | 143,072,068 | 143,846,046 | 1 | 0 | 1 | 0 |
| Case 52 | 8 | 143,846,525 | 144,312,990 | 1 | 1 | 2 | 0 |
| Case 52 | 8 | 144,315,939 | 144,438,516 | 1 | 0 | 1 | 0 |
| Case 52 | 8 | 144,446,285 | 144,643,548 | 1 | 1 | 2 | 0 |
| Case 52 | 8 | 144,643,575 | 145,541,227 | 1 | 0 | 1 | 0 |

|         |    |             |             |   |   |   |   |
|---------|----|-------------|-------------|---|---|---|---|
| Case 52 | 8  | 145,541,623 | 145,722,624 | 1 | 1 | 2 | 0 |
| Case 52 | 8  | 145,724,275 | 146,293,414 | 1 | 0 | 1 | 0 |
| Case 52 | 9  | 46,587      | 46,944,322  | 1 | 0 | 1 | 0 |
| Case 52 | 9  | 65,629,772  | 141,066,491 | 1 | 0 | 1 | 0 |
| Case 52 | 10 | 98,087      | 39,097,912  | 1 | 0 | 1 | 0 |
| Case 52 | 10 | 42,436,301  | 46,965,803  | 1 | 0 | 1 | 0 |
| Case 52 | 10 | 46,965,833  | 47,087,244  | 1 | 1 | 2 | 0 |
| Case 52 | 10 | 47,087,390  | 135,477,883 | 1 | 0 | 1 | 0 |
| Case 52 | 11 | 193,146     | 51,591,253  | 1 | 0 | 1 | 0 |
| Case 52 | 11 | 54,794,237  | 134,934,063 | 1 | 0 | 1 | 0 |
| Case 52 | 12 | 191,619     | 1,272,363   | 1 | 0 | 1 | 0 |
| Case 52 | 12 | 1,278,676   | 1,590,069   | 4 | 0 | 4 | 1 |
| Case 52 | 12 | 1,590,758   | 34,853,011  | 1 | 0 | 1 | 0 |
| Case 52 | 12 | 37,876,400  | 133,810,935 | 1 | 0 | 1 | 0 |
| Case 52 | 13 | 19,058,717  | 115,103,529 | 1 | 0 | 1 | 0 |
| Case 52 | 14 | 19,280,733  | 22,433,866  | 1 | 0 | 1 | 0 |
| Case 52 | 14 | 22,434,423  | 22,957,900  | 1 | 1 | 2 | 0 |
| Case 52 | 14 | 22,959,592  | 107,287,663 | 1 | 0 | 1 | 0 |
| Case 52 | 15 | 20,034,919  | 102,461,162 | 1 | 0 | 1 | 0 |
| Case 52 | 16 | 88,165      | 35,285,582  | 1 | 0 | 1 | 0 |
| Case 52 | 16 | 46,450,037  | 90,274,695  | 1 | 0 | 1 | 0 |
| Case 52 | 17 | 11,885      | 22,242,355  | 1 | 0 | 1 | 0 |
| Case 52 | 17 | 25,268,142  | 34,436,708  | 1 | 0 | 1 | 0 |
| Case 52 | 17 | 34,443,811  | 34,476,396  | 4 | 0 | 4 | 1 |
| Case 52 | 17 | 34,597,521  | 39,041,052  | 1 | 0 | 1 | 0 |
| Case 52 | 17 | 39,041,107  | 39,096,618  | 2 | 0 | 2 | 1 |
| Case 52 | 17 | 39,114,897  | 39,738,761  | 1 | 0 | 1 | 0 |
| Case 52 | 17 | 39,739,363  | 40,070,029  | 2 | 0 | 2 | 1 |
| Case 52 | 17 | 40,070,098  | 81,060,040  | 1 | 0 | 1 | 0 |
| Case 52 | 18 | 87,505      | 15,375,878  | 1 | 0 | 1 | 0 |
| Case 52 | 18 | 18,520,354  | 78,015,180  | 1 | 0 | 1 | 0 |
| Case 52 | 19 | 260,912     | 11,916,890  | 1 | 0 | 1 | 0 |
| Case 52 | 19 | 11,916,914  | 12,577,302  | 0 | 0 | 0 | 0 |
| Case 52 | 19 | 12,581,063  | 24,629,285  | 1 | 0 | 1 | 0 |
| Case 52 | 19 | 27,732,159  | 37,331,614  | 1 | 0 | 1 | 0 |
| Case 52 | 19 | 37,346,826  | 38,160,742  | 0 | 0 | 0 | 0 |
| Case 52 | 19 | 38,160,893  | 59,097,160  | 1 | 0 | 1 | 0 |
| Case 52 | 20 | 63,244      | 26,293,985  | 1 | 0 | 1 | 0 |
| Case 52 | 20 | 29,425,357  | 62,948,788  | 1 | 0 | 1 | 0 |
| Case 52 | 21 | 10,827,533  | 10,971,337  | 1 | 0 | 1 | 0 |
| Case 52 | 21 | 14,368,320  | 48,100,155  | 1 | 0 | 1 | 0 |
| Case 52 | 22 | 16,114,244  | 51,195,728  | 1 | 0 | 1 | 0 |
| Case 53 | 1  | 82,154      | 27,493,679  | 1 | 1 | 2 | 0 |
| Case 53 | 1  | 27,530,146  | 27,622,832  | 6 | 0 | 6 | 1 |
| Case 53 | 1  | 27,627,950  | 121,346,616 | 1 | 1 | 2 | 0 |
| Case 53 | 1  | 142,649,718 | 177,508,044 | 1 | 1 | 2 | 0 |
| Case 53 | 1  | 177,512,260 | 177,558,449 | 0 | 0 | 0 | 0 |
| Case 53 | 1  | 177,560,435 | 196,711,098 | 1 | 1 | 2 | 0 |
| Case 53 | 1  | 196,712,594 | 196,918,615 | 3 | 3 | 6 | 0 |
| Case 53 | 1  | 196,919,982 | 249,218,992 | 1 | 1 | 2 | 0 |
| Case 53 | 2  | 18,674      | 92,081,640  | 1 | 1 | 2 | 0 |
| Case 53 | 2  | 95,429,424  | 155,703,068 | 1 | 1 | 2 | 0 |
| Case 53 | 2  | 155,703,266 | 155,819,972 | 0 | 0 | 0 | 0 |
| Case 53 | 2  | 155,879,752 | 243,048,760 | 1 | 1 | 2 | 0 |
| Case 53 | 3  | 61,495      | 60,196,537  | 1 | 1 | 2 | 0 |
| Case 53 | 3  | 60,197,485  | 61,232,197  | 0 | 0 | 0 | 0 |
| Case 53 | 3  | 61,236,328  | 90,442,925  | 1 | 1 | 2 | 0 |
| Case 53 | 3  | 93,537,290  | 158,923,515 | 1 | 1 | 2 | 0 |
| Case 53 | 3  | 158,932,371 | 159,688,029 | 0 | 0 | 0 | 0 |
| Case 53 | 3  | 159,688,294 | 162,264,998 | 1 | 1 | 2 | 0 |
| Case 53 | 3  | 162,266,475 | 164,632,238 | 0 | 0 | 0 | 0 |



|         |   |             |             |   |   |   |   |
|---------|---|-------------|-------------|---|---|---|---|
| Case 53 | 3 | 164,654,374 | 197,838,262 | 1 | 1 | 2 | 0 |
| Case 53 | 4 | 71,566      | 22,699,639  | 1 | 1 | 2 | 0 |
| Case 53 | 4 | 22,711,069  | 22,774,617  | 0 | 0 | 0 | 0 |
| Case 53 | 4 | 22,786,034  | 31,991,952  | 1 | 1 | 2 | 0 |
| Case 53 | 4 | 31,996,147  | 32,225,480  | 0 | 0 | 0 | 0 |
| Case 53 | 4 | 32,226,350  | 49,620,898  | 1 | 1 | 2 | 0 |
| Case 53 | 4 | 52,697,856  | 161,856,343 | 1 | 1 | 2 | 0 |
| Case 53 | 4 | 161,861,640 | 161,924,832 | 6 | 0 | 6 | 1 |
| Case 53 | 4 | 161,935,342 | 190,963,766 | 1 | 1 | 2 | 0 |
| Case 53 | 5 | 38,139      | 730,271     | 1 | 1 | 2 | 0 |
| Case 53 | 5 | 788,646     | 825,338     | 3 | 3 | 6 | 0 |
| Case 53 | 5 | 840,717     | 46,399,093  | 1 | 1 | 2 | 0 |
| Case 53 | 5 | 49,457,282  | 139,931,384 | 1 | 1 | 2 | 0 |
| Case 53 | 5 | 139,931,607 | 139,931,740 | 0 | 0 | 0 | 0 |
| Case 53 | 5 | 139,936,760 | 180,693,127 | 1 | 1 | 2 | 0 |
| Case 53 | 6 | 108,666     | 31,337,633  | 1 | 1 | 2 | 0 |
| Case 53 | 6 | 31,338,528  | 31,341,357  | 0 | 0 | 0 | 0 |
| Case 53 | 6 | 31,342,484  | 58,752,089  | 1 | 1 | 2 | 0 |
| Case 53 | 6 | 61,891,118  | 78,949,821  | 1 | 1 | 2 | 0 |
| Case 53 | 6 | 78,953,246  | 79,039,234  | 0 | 0 | 0 | 0 |
| Case 53 | 6 | 79,042,157  | 170,980,171 | 1 | 1 | 2 | 0 |
| Case 53 | 7 | 44,935      | 38,292,663  | 1 | 1 | 2 | 0 |
| Case 53 | 7 | 38,297,145  | 38,383,243  | 2 | 2 | 4 | 0 |
| Case 53 | 7 | 38,385,938  | 58,019,061  | 1 | 1 | 2 | 0 |
| Case 53 | 7 | 61,056,053  | 61,852,895  | 1 | 1 | 2 | 0 |
| Case 53 | 7 | 61,994,170  | 62,437,581  | 0 | 0 | 0 | 0 |
| Case 53 | 7 | 62,458,262  | 159,119,486 | 1 | 1 | 2 | 0 |
| Case 53 | 8 | 164,984     | 2,292,537   | 4 | 0 | 4 | 1 |
| Case 53 | 8 | 2,293,408   | 2,484,674   | 5 | 0 | 5 | 1 |
| Case 53 | 8 | 2,487,969   | 3,172,327   | 4 | 0 | 4 | 1 |
| Case 53 | 8 | 3,172,404   | 4,638,706   | 5 | 0 | 5 | 1 |
| Case 53 | 8 | 4,640,275   | 4,815,582   | 4 | 0 | 4 | 1 |
| Case 53 | 8 | 4,815,661   | 6,283,479   | 5 | 0 | 5 | 1 |
| Case 53 | 8 | 6,283,772   | 6,881,638   | 4 | 0 | 4 | 1 |
| Case 53 | 8 | 6,883,291   | 8,380,016   | 5 | 0 | 5 | 1 |
| Case 53 | 8 | 8,383,065   | 9,178,921   | 5 | 1 | 6 | 0 |
| Case 53 | 8 | 9,180,134   | 9,897,041   | 5 | 0 | 5 | 1 |
| Case 53 | 8 | 9,899,255   | 11,352,541  | 4 | 0 | 4 | 1 |
| Case 53 | 8 | 11,354,933  | 13,380,879  | 5 | 0 | 5 | 1 |
| Case 53 | 8 | 13,382,080  | 14,522,350  | 5 | 1 | 6 | 0 |
| Case 53 | 8 | 14,529,851  | 16,042,713  | 5 | 0 | 5 | 1 |
| Case 53 | 8 | 16,042,900  | 17,026,852  | 5 | 1 | 6 | 0 |
| Case 53 | 8 | 17,028,091  | 17,486,068  | 5 | 0 | 5 | 1 |
| Case 53 | 8 | 17,486,113  | 17,928,811  | 5 | 1 | 6 | 0 |
| Case 53 | 8 | 17,928,814  | 18,109,256  | 5 | 0 | 5 | 1 |
| Case 53 | 8 | 18,111,750  | 19,150,880  | 5 | 1 | 6 | 0 |
| Case 53 | 8 | 19,151,139  | 19,970,337  | 5 | 0 | 5 | 1 |
| Case 53 | 8 | 19,970,840  | 21,448,663  | 4 | 0 | 4 | 1 |
| Case 53 | 8 | 21,451,894  | 21,996,295  | 5 | 0 | 5 | 1 |
| Case 53 | 8 | 21,996,300  | 23,432,332  | 4 | 0 | 4 | 1 |
| Case 53 | 8 | 23,436,323  | 23,436,752  | 5 | 0 | 5 | 1 |
| Case 53 | 8 | 23,438,975  | 23,568,464  | 5 | 1 | 6 | 0 |
| Case 53 | 8 | 23,570,489  | 27,205,777  | 5 | 0 | 5 | 1 |
| Case 53 | 8 | 27,211,333  | 27,505,756  | 4 | 0 | 4 | 1 |
| Case 53 | 8 | 27,507,233  | 37,626,292  | 5 | 0 | 5 | 1 |
| Case 53 | 8 | 37,630,315  | 37,734,755  | 4 | 0 | 4 | 1 |
| Case 53 | 8 | 37,734,854  | 39,133,379  | 5 | 0 | 5 | 1 |
| Case 53 | 8 | 39,133,853  | 39,850,058  | 5 | 1 | 6 | 0 |
| Case 53 | 8 | 39,855,954  | 43,791,691  | 5 | 0 | 5 | 1 |
| Case 53 | 8 | 46,886,735  | 62,086,176  | 5 | 0 | 5 | 1 |
| Case 53 | 8 | 62,096,568  | 62,940,286  | 6 | 1 | 7 | 0 |

|         |    |             |             |   |   |   |   |
|---------|----|-------------|-------------|---|---|---|---|
| Case 53 | 8  | 62,944,691  | 62,945,023  | 5 | 0 | 5 | 1 |
| Case 53 | 8  | 62,952,067  | 63,014,215  | 6 | 1 | 7 | 0 |
| Case 53 | 8  | 63,014,589  | 63,969,320  | 5 | 1 | 6 | 0 |
| Case 53 | 8  | 63,976,793  | 90,158,554  | 5 | 0 | 5 | 1 |
| Case 53 | 8  | 90,161,392  | 91,297,472  | 6 | 1 | 7 | 0 |
| Case 53 | 8  | 91,299,951  | 99,838,531  | 5 | 0 | 5 | 1 |
| Case 53 | 8  | 99,846,972  | 99,895,405  | 6 | 1 | 7 | 0 |
| Case 53 | 8  | 99,925,628  | 101,232,557 | 5 | 1 | 6 | 0 |
| Case 53 | 8  | 101,232,701 | 110,691,429 | 5 | 0 | 5 | 1 |
| Case 53 | 8  | 110,701,498 | 111,298,543 | 6 | 1 | 7 | 0 |
| Case 53 | 8  | 111,302,825 | 118,834,802 | 5 | 0 | 5 | 1 |
| Case 53 | 8  | 118,835,137 | 120,012,700 | 5 | 1 | 6 | 0 |
| Case 53 | 8  | 120,013,090 | 127,889,918 | 5 | 0 | 5 | 1 |
| Case 53 | 8  | 127,897,279 | 128,109,129 | 6 | 1 | 7 | 0 |
| Case 53 | 8  | 128,109,287 | 135,487,835 | 5 | 0 | 5 | 1 |
| Case 53 | 8  | 135,489,339 | 135,736,517 | 4 | 0 | 4 | 1 |
| Case 53 | 8  | 135,738,044 | 139,051,681 | 5 | 0 | 5 | 1 |
| Case 53 | 8  | 139,051,846 | 139,967,699 | 4 | 0 | 4 | 1 |
| Case 53 | 8  | 139,975,998 | 142,081,677 | 5 | 0 | 5 | 1 |
| Case 53 | 8  | 142,084,221 | 142,444,950 | 4 | 0 | 4 | 1 |
| Case 53 | 8  | 142,445,249 | 142,500,309 | 5 | 0 | 5 | 1 |
| Case 53 | 8  | 142,500,315 | 143,511,806 | 4 | 0 | 4 | 1 |
| Case 53 | 8  | 143,514,434 | 144,990,983 | 5 | 0 | 5 | 1 |
| Case 53 | 8  | 144,990,997 | 145,160,983 | 4 | 0 | 4 | 1 |
| Case 53 | 8  | 145,161,803 | 146,293,414 | 5 | 0 | 5 | 1 |
| Case 53 | 9  | 46,587      | 46,944,322  | 1 | 1 | 2 | 0 |
| Case 53 | 9  | 65,629,772  | 141,066,491 | 1 | 1 | 2 | 0 |
| Case 53 | 10 | 98,087      | 39,097,912  | 1 | 1 | 2 | 0 |
| Case 53 | 10 | 42,436,301  | 58,885,646  | 1 | 1 | 2 | 0 |
| Case 53 | 10 | 58,892,275  | 58,943,359  | 0 | 0 | 0 | 0 |
| Case 53 | 10 | 58,944,057  | 79,181,324  | 1 | 1 | 2 | 0 |
| Case 53 | 10 | 79,185,333  | 79,212,639  | 6 | 0 | 6 | 1 |
| Case 53 | 10 | 79,214,413  | 135,477,883 | 1 | 1 | 2 | 0 |
| Case 53 | 11 | 193,146     | 50,447,311  | 1 | 1 | 2 | 0 |
| Case 53 | 11 | 50,461,838  | 51,591,253  | 1 | 0 | 1 | 0 |
| Case 53 | 11 | 54,794,237  | 55,029,751  | 1 | 0 | 1 | 0 |
| Case 53 | 11 | 55,049,310  | 134,934,063 | 1 | 1 | 2 | 0 |
| Case 53 | 12 | 191,619     | 7,993,316   | 1 | 1 | 2 | 0 |
| Case 53 | 12 | 8,000,912   | 8,123,306   | 6 | 0 | 6 | 1 |
| Case 53 | 12 | 8,125,745   | 34,506,968  | 1 | 1 | 2 | 0 |
| Case 53 | 12 | 34,523,378  | 34,853,011  | 0 | 0 | 0 | 0 |
| Case 53 | 12 | 37,876,400  | 38,573,362  | 0 | 0 | 0 | 0 |
| Case 53 | 12 | 38,588,392  | 133,810,935 | 1 | 1 | 2 | 0 |
| Case 53 | 13 | 19,058,717  | 115,103,529 | 1 | 1 | 2 | 0 |
| Case 53 | 14 | 19,280,733  | 22,381,668  | 1 | 1 | 2 | 0 |
| Case 53 | 14 | 22,381,754  | 22,653,511  | 2 | 2 | 4 | 0 |
| Case 53 | 14 | 22,655,767  | 22,678,544  | 1 | 1 | 2 | 0 |
| Case 53 | 14 | 22,686,975  | 22,957,171  | 3 | 3 | 6 | 0 |
| Case 53 | 14 | 22,957,488  | 67,417,083  | 1 | 1 | 2 | 0 |
| Case 53 | 14 | 67,453,858  | 67,486,808  | 6 | 0 | 6 | 1 |
| Case 53 | 14 | 67,500,727  | 107,287,663 | 1 | 1 | 2 | 0 |
| Case 53 | 15 | 20,034,919  | 102,461,162 | 1 | 1 | 2 | 0 |
| Case 53 | 16 | 88,165      | 35,285,582  | 1 | 1 | 2 | 0 |
| Case 53 | 16 | 46,450,037  | 78,029,375  | 1 | 1 | 2 | 0 |
| Case 53 | 16 | 78,031,074  | 78,148,935  | 6 | 0 | 6 | 1 |
| Case 53 | 16 | 78,148,974  | 78,221,718  | 1 | 1 | 2 | 0 |
| Case 53 | 16 | 78,222,527  | 78,278,601  | 0 | 0 | 0 | 0 |
| Case 53 | 16 | 78,280,176  | 79,074,029  | 1 | 1 | 2 | 0 |
| Case 53 | 16 | 79,075,311  | 79,136,139  | 4 | 0 | 4 | 1 |
| Case 53 | 16 | 79,143,983  | 90,274,695  | 1 | 1 | 2 | 0 |
| Case 53 | 17 | 11,885      | 15,039,528  | 1 | 1 | 2 | 0 |

|         |    |            |            |   |   |   |   |
|---------|----|------------|------------|---|---|---|---|
| Case 53 | 17 | 15,044,804 | 15,058,236 | 0 | 0 | 0 | 0 |
| Case 53 | 17 | 15,058,991 | 22,242,355 | 1 | 1 | 2 | 0 |
| Case 53 | 17 | 25,268,142 | 81,060,040 | 1 | 1 | 2 | 0 |
| Case 53 | 18 | 87,505     | 680,520    | 1 | 1 | 2 | 0 |
| Case 53 | 18 | 681,962    | 691,266    | 0 | 0 | 0 | 0 |
| Case 53 | 18 | 694,206    | 15,375,878 | 1 | 1 | 2 | 0 |
| Case 53 | 18 | 18,520,354 | 26,881,864 | 1 | 1 | 2 | 0 |
| Case 53 | 18 | 26,884,367 | 26,970,866 | 0 | 0 | 0 | 0 |
| Case 53 | 18 | 26,971,305 | 78,015,180 | 1 | 1 | 2 | 0 |
| Case 53 | 19 | 260,912    | 12,154,684 | 1 | 1 | 2 | 0 |
| Case 53 | 19 | 12,154,799 | 12,186,992 | 0 | 0 | 0 | 0 |
| Case 53 | 19 | 12,187,001 | 20,970,367 | 1 | 1 | 2 | 0 |
| Case 53 | 19 | 20,982,627 | 24,629,285 | 1 | 0 | 1 | 0 |
| Case 53 | 19 | 27,732,159 | 28,079,145 | 1 | 0 | 1 | 0 |
| Case 53 | 19 | 28,095,812 | 36,940,510 | 1 | 1 | 2 | 0 |
| Case 53 | 19 | 36,940,518 | 38,230,534 | 1 | 0 | 1 | 0 |
| Case 53 | 19 | 38,230,695 | 59,097,160 | 1 | 1 | 2 | 0 |
| Case 53 | 20 | 63,244     | 26,293,985 | 1 | 1 | 2 | 0 |
| Case 53 | 20 | 29,425,357 | 62,948,788 | 1 | 1 | 2 | 0 |
| Case 53 | 21 | 10,827,533 | 10,971,337 | 1 | 1 | 2 | 0 |
| Case 53 | 21 | 14,368,320 | 48,100,155 | 1 | 1 | 2 | 0 |
| Case 53 | 22 | 16,114,244 | 51,195,728 | 1 | 1 | 2 | 0 |
| Case 56 | 1  | 82,154     | 909,015    | 2 | 1 | 3 | 0 |
| Case 56 | 1  | 909,238    | 909,276    | 1 | 0 | 1 | 0 |
| Case 56 | 1  | 909,309    | 2,586,303  | 2 | 1 | 3 | 0 |
| Case 56 | 1  | 2,587,026  | 3,119,729  | 2 | 2 | 4 | 0 |
| Case 56 | 1  | 3,131,235  | 4,009,956  | 2 | 1 | 3 | 0 |
| Case 56 | 1  | 4,010,743  | 5,612,956  | 2 | 2 | 4 | 0 |
| Case 56 | 1  | 5,613,219  | 6,796,024  | 2 | 1 | 3 | 0 |
| Case 56 | 1  | 6,797,684  | 7,363,310  | 2 | 2 | 4 | 0 |
| Case 56 | 1  | 7,368,829  | 7,482,205  | 2 | 1 | 3 | 0 |
| Case 56 | 1  | 7,482,757  | 7,595,233  | 2 | 2 | 4 | 0 |
| Case 56 | 1  | 7,598,094  | 7,725,114  | 2 | 1 | 3 | 0 |
| Case 56 | 1  | 7,725,170  | 9,784,916  | 2 | 2 | 4 | 0 |
| Case 56 | 1  | 9,787,083  | 9,801,341  | 2 | 1 | 3 | 0 |
| Case 56 | 1  | 9,804,021  | 15,492,032 | 2 | 2 | 4 | 0 |
| Case 56 | 1  | 15,495,620 | 15,519,417 | 2 | 1 | 3 | 0 |
| Case 56 | 1  | 15,520,583 | 15,728,289 | 3 | 1 | 4 | 0 |
| Case 56 | 1  | 15,732,793 | 15,753,398 | 2 | 1 | 3 | 0 |
| Case 56 | 1  | 15,753,662 | 15,834,360 | 2 | 2 | 4 | 0 |
| Case 56 | 1  | 15,844,057 | 15,978,294 | 2 | 1 | 3 | 0 |
| Case 56 | 1  | 15,978,331 | 16,201,502 | 3 | 1 | 4 | 0 |
| Case 56 | 1  | 16,202,843 | 43,396,718 | 2 | 1 | 3 | 0 |
| Case 56 | 1  | 43,398,085 | 43,529,875 | 2 | 2 | 4 | 0 |
| Case 56 | 1  | 43,531,355 | 44,559,401 | 2 | 1 | 3 | 0 |
| Case 56 | 1  | 44,568,322 | 44,860,224 | 2 | 2 | 4 | 0 |
| Case 56 | 1  | 44,877,962 | 46,120,890 | 2 | 1 | 3 | 0 |
| Case 56 | 1  | 46,125,880 | 46,645,524 | 2 | 2 | 4 | 0 |
| Case 56 | 1  | 46,646,780 | 46,895,641 | 2 | 1 | 3 | 0 |
| Case 56 | 1  | 46,897,698 | 47,007,844 | 2 | 2 | 4 | 0 |
| Case 56 | 1  | 47,011,762 | 47,284,526 | 2 | 1 | 3 | 0 |
| Case 56 | 1  | 47,284,923 | 47,746,113 | 2 | 2 | 4 | 0 |
| Case 56 | 1  | 47,746,254 | 47,904,000 | 2 | 1 | 3 | 0 |
| Case 56 | 1  | 47,916,965 | 48,066,171 | 2 | 2 | 4 | 0 |
| Case 56 | 1  | 48,070,955 | 48,362,713 | 2 | 1 | 3 | 0 |
| Case 56 | 1  | 48,369,895 | 48,539,143 | 2 | 2 | 4 | 0 |
| Case 56 | 1  | 48,546,195 | 48,709,019 | 2 | 1 | 3 | 0 |
| Case 56 | 1  | 48,713,394 | 52,198,426 | 2 | 2 | 4 | 0 |
| Case 56 | 1  | 52,211,229 | 53,385,292 | 2 | 1 | 3 | 0 |
| Case 56 | 1  | 53,393,706 | 53,674,542 | 2 | 2 | 4 | 0 |
| Case 56 | 1  | 53,675,049 | 53,792,651 | 2 | 1 | 3 | 0 |

|         |   |             |             |   |   |   |   |
|---------|---|-------------|-------------|---|---|---|---|
| Case 56 | 1 | 53,797,400  | 54,187,449  | 2 | 2 | 4 | 0 |
| Case 56 | 1 | 54,189,668  | 54,611,295  | 2 | 1 | 3 | 0 |
| Case 56 | 1 | 54,613,369  | 54,750,625  | 2 | 2 | 4 | 0 |
| Case 56 | 1 | 54,751,900  | 54,818,099  | 2 | 0 | 2 | 1 |
| Case 56 | 1 | 54,821,429  | 55,080,475  | 2 | 1 | 3 | 0 |
| Case 56 | 1 | 55,081,762  | 55,134,536  | 2 | 2 | 4 | 0 |
| Case 56 | 1 | 55,134,585  | 55,688,016  | 2 | 1 | 3 | 0 |
| Case 56 | 1 | 55,696,884  | 58,974,163  | 2 | 2 | 4 | 0 |
| Case 56 | 1 | 58,978,397  | 59,056,326  | 2 | 1 | 3 | 0 |
| Case 56 | 1 | 59,057,933  | 62,713,224  | 2 | 2 | 4 | 0 |
| Case 56 | 1 | 62,713,246  | 62,739,769  | 2 | 1 | 3 | 0 |
| Case 56 | 1 | 62,739,801  | 63,872,032  | 2 | 2 | 4 | 0 |
| Case 56 | 1 | 63,872,871  | 64,105,799  | 2 | 1 | 3 | 0 |
| Case 56 | 1 | 64,108,771  | 64,198,313  | 2 | 2 | 4 | 0 |
| Case 56 | 1 | 64,209,711  | 64,643,145  | 2 | 1 | 3 | 0 |
| Case 56 | 1 | 64,643,277  | 66,752,207  | 2 | 2 | 4 | 0 |
| Case 56 | 1 | 66,756,717  | 66,939,920  | 2 | 1 | 3 | 0 |
| Case 56 | 1 | 66,940,078  | 72,121,585  | 2 | 2 | 4 | 0 |
| Case 56 | 1 | 72,126,388  | 72,575,560  | 2 | 1 | 3 | 0 |
| Case 56 | 1 | 72,581,966  | 75,007,068  | 2 | 2 | 4 | 0 |
| Case 56 | 1 | 75,008,008  | 75,055,585  | 2 | 1 | 3 | 0 |
| Case 56 | 1 | 75,055,741  | 83,983,252  | 2 | 2 | 4 | 0 |
| Case 56 | 1 | 83,987,643  | 120,471,739 | 2 | 0 | 2 | 1 |
| Case 56 | 1 | 120,478,125 | 121,346,616 | 2 | 1 | 3 | 0 |
| Case 56 | 1 | 142,649,718 | 145,281,993 | 2 | 1 | 3 | 0 |
| Case 56 | 1 | 145,394,955 | 146,089,268 | 2 | 0 | 2 | 1 |
| Case 56 | 1 | 146,152,553 | 147,033,573 | 2 | 1 | 3 | 0 |
| Case 56 | 1 | 147,043,542 | 149,060,682 | 2 | 0 | 2 | 1 |
| Case 56 | 1 | 149,140,459 | 171,077,348 | 2 | 1 | 3 | 0 |
| Case 56 | 1 | 171,077,372 | 171,295,650 | 2 | 2 | 4 | 0 |
| Case 56 | 1 | 171,296,762 | 177,905,469 | 2 | 1 | 3 | 0 |
| Case 56 | 1 | 177,905,488 | 178,095,048 | 3 | 1 | 4 | 0 |
| Case 56 | 1 | 178,156,816 | 199,362,216 | 2 | 1 | 3 | 0 |
| Case 56 | 1 | 199,362,820 | 200,997,930 | 3 | 1 | 4 | 0 |
| Case 56 | 1 | 200,998,358 | 201,058,513 | 2 | 1 | 3 | 0 |
| Case 56 | 1 | 201,059,084 | 201,175,658 | 3 | 1 | 4 | 0 |
| Case 56 | 1 | 201,175,715 | 201,196,322 | 2 | 1 | 3 | 0 |
| Case 56 | 1 | 201,197,331 | 201,240,182 | 3 | 1 | 4 | 0 |
| Case 56 | 1 | 201,240,763 | 201,353,941 | 2 | 1 | 3 | 0 |
| Case 56 | 1 | 201,354,891 | 201,571,927 | 3 | 1 | 4 | 0 |
| Case 56 | 1 | 201,572,071 | 201,792,306 | 2 | 1 | 3 | 0 |
| Case 56 | 1 | 201,792,500 | 202,003,269 | 3 | 1 | 4 | 0 |
| Case 56 | 1 | 202,013,757 | 202,564,040 | 2 | 1 | 3 | 0 |
| Case 56 | 1 | 202,564,221 | 203,444,384 | 3 | 1 | 4 | 0 |
| Case 56 | 1 | 203,449,615 | 203,837,577 | 2 | 1 | 3 | 0 |
| Case 56 | 1 | 203,840,037 | 204,334,765 | 3 | 1 | 4 | 0 |
| Case 56 | 1 | 204,344,375 | 204,633,340 | 2 | 1 | 3 | 0 |
| Case 56 | 1 | 204,633,526 | 204,891,547 | 3 | 1 | 4 | 0 |
| Case 56 | 1 | 204,892,329 | 205,053,315 | 2 | 1 | 3 | 0 |
| Case 56 | 1 | 205,054,114 | 205,884,492 | 3 | 1 | 4 | 0 |
| Case 56 | 1 | 205,884,508 | 206,986,545 | 2 | 1 | 3 | 0 |
| Case 56 | 1 | 206,986,926 | 207,077,210 | 3 | 1 | 4 | 0 |
| Case 56 | 1 | 207,078,197 | 207,245,684 | 2 | 1 | 3 | 0 |
| Case 56 | 1 | 207,249,792 | 208,196,081 | 3 | 1 | 4 | 0 |
| Case 56 | 1 | 208,197,785 | 208,314,807 | 2 | 1 | 3 | 0 |
| Case 56 | 1 | 208,315,674 | 214,457,286 | 3 | 1 | 4 | 0 |
| Case 56 | 1 | 214,461,354 | 214,819,838 | 2 | 1 | 3 | 0 |
| Case 56 | 1 | 214,819,850 | 223,832,362 | 3 | 1 | 4 | 0 |
| Case 56 | 1 | 223,833,290 | 224,216,822 | 2 | 1 | 3 | 0 |
| Case 56 | 1 | 224,223,659 | 224,429,078 | 3 | 1 | 4 | 0 |
| Case 56 | 1 | 224,437,967 | 224,880,653 | 2 | 1 | 3 | 0 |

|         |   |             |             |   |   |   |   |
|---------|---|-------------|-------------|---|---|---|---|
| Case 56 | 1 | 224,881,828 | 226,015,017 | 3 | 1 | 4 | 0 |
| Case 56 | 1 | 226,015,116 | 226,077,132 | 2 | 1 | 3 | 0 |
| Case 56 | 1 | 226,077,231 | 227,920,061 | 3 | 1 | 4 | 0 |
| Case 56 | 1 | 227,920,103 | 228,006,435 | 2 | 1 | 3 | 0 |
| Case 56 | 1 | 228,010,782 | 228,279,023 | 3 | 1 | 4 | 0 |
| Case 56 | 1 | 228,282,695 | 228,601,506 | 2 | 1 | 3 | 0 |
| Case 56 | 1 | 228,601,638 | 229,566,362 | 3 | 1 | 4 | 0 |
| Case 56 | 1 | 229,571,061 | 229,803,654 | 2 | 1 | 3 | 0 |
| Case 56 | 1 | 229,804,538 | 230,148,080 | 3 | 1 | 4 | 0 |
| Case 56 | 1 | 230,151,884 | 230,551,909 | 2 | 1 | 3 | 0 |
| Case 56 | 1 | 230,560,900 | 230,897,893 | 3 | 1 | 4 | 0 |
| Case 56 | 1 | 230,898,397 | 231,115,887 | 2 | 1 | 3 | 0 |
| Case 56 | 1 | 231,118,857 | 231,346,186 | 3 | 1 | 4 | 0 |
| Case 56 | 1 | 231,352,767 | 231,474,181 | 2 | 1 | 3 | 0 |
| Case 56 | 1 | 231,476,789 | 233,368,289 | 3 | 1 | 4 | 0 |
| Case 56 | 1 | 233,372,676 | 233,608,565 | 2 | 1 | 3 | 0 |
| Case 56 | 1 | 233,619,908 | 234,259,825 | 3 | 1 | 4 | 0 |
| Case 56 | 1 | 234,260,086 | 234,367,309 | 2 | 1 | 3 | 0 |
| Case 56 | 1 | 234,367,327 | 234,699,236 | 3 | 1 | 4 | 0 |
| Case 56 | 1 | 234,701,168 | 236,157,277 | 2 | 1 | 3 | 0 |
| Case 56 | 1 | 236,166,380 | 236,451,196 | 3 | 1 | 4 | 0 |
| Case 56 | 1 | 236,465,416 | 237,111,682 | 2 | 1 | 3 | 0 |
| Case 56 | 1 | 237,114,288 | 240,791,177 | 3 | 1 | 4 | 0 |
| Case 56 | 1 | 240,798,089 | 242,411,114 | 1 | 1 | 2 | 0 |
| Case 56 | 1 | 242,416,045 | 242,431,557 | 7 | 0 | 7 | 1 |
| Case 56 | 1 | 242,440,891 | 243,731,693 | 1 | 1 | 2 | 0 |
| Case 56 | 1 | 243,768,906 | 246,243,336 | 2 | 1 | 3 | 0 |
| Case 56 | 1 | 246,251,363 | 246,330,385 | 1 | 0 | 1 | 0 |
| Case 56 | 1 | 246,341,231 | 249,218,992 | 2 | 1 | 3 | 0 |
| Case 56 | 2 | 18,674      | 26,159,940  | 2 | 0 | 2 | 1 |
| Case 56 | 2 | 26,173,503  | 26,618,543  | 2 | 1 | 3 | 0 |
| Case 56 | 2 | 26,623,160  | 26,647,203  | 1 | 0 | 1 | 0 |
| Case 56 | 2 | 26,653,457  | 79,509,292  | 2 | 1 | 3 | 0 |
| Case 56 | 2 | 79,516,139  | 79,581,175  | 1 | 0 | 1 | 0 |
| Case 56 | 2 | 79,586,600  | 92,081,640  | 2 | 1 | 3 | 0 |
| Case 56 | 2 | 95,429,424  | 133,392,633 | 2 | 1 | 3 | 0 |
| Case 56 | 2 | 133,396,179 | 133,664,437 | 2 | 0 | 2 | 1 |
| Case 56 | 2 | 133,672,853 | 135,926,351 | 2 | 1 | 3 | 0 |
| Case 56 | 2 | 135,927,428 | 137,493,598 | 3 | 1 | 4 | 0 |
| Case 56 | 2 | 137,493,893 | 137,493,893 | 2 | 1 | 3 | 0 |
| Case 56 | 2 | 137,495,920 | 137,552,254 | 7 | 0 | 7 | 1 |
| Case 56 | 2 | 137,553,966 | 137,553,966 | 1 | 1 | 2 | 0 |
| Case 56 | 2 | 137,554,697 | 140,567,880 | 2 | 1 | 3 | 0 |
| Case 56 | 2 | 140,577,118 | 140,847,560 | 4 | 1 | 5 | 0 |
| Case 56 | 2 | 140,858,451 | 140,868,186 | 3 | 1 | 4 | 0 |
| Case 56 | 2 | 140,870,484 | 144,935,972 | 7 | 0 | 7 | 1 |
| Case 56 | 2 | 144,940,576 | 149,988,911 | 1 | 1 | 2 | 0 |
| Case 56 | 2 | 149,999,742 | 150,237,153 | 2 | 1 | 3 | 0 |
| Case 56 | 2 | 150,242,490 | 150,271,975 | 3 | 1 | 4 | 0 |
| Case 56 | 2 | 150,274,458 | 179,315,726 | 1 | 1 | 2 | 0 |
| Case 56 | 2 | 179,318,222 | 179,395,554 | 7 | 0 | 7 | 1 |
| Case 56 | 2 | 179,395,555 | 179,395,573 | 2 | 0 | 2 | 1 |
| Case 56 | 2 | 179,395,813 | 179,395,813 | 6 | 0 | 6 | 1 |
| Case 56 | 2 | 179,395,926 | 179,395,926 | 2 | 0 | 2 | 1 |
| Case 56 | 2 | 179,395,958 | 179,543,504 | 6 | 0 | 6 | 1 |
| Case 56 | 2 | 179,544,983 | 179,544,983 | 1 | 1 | 2 | 0 |
| Case 56 | 2 | 179,545,032 | 179,759,810 | 5 | 0 | 5 | 1 |
| Case 56 | 2 | 179,770,175 | 180,479,625 | 7 | 0 | 7 | 1 |
| Case 56 | 2 | 180,480,167 | 187,735,749 | 1 | 1 | 2 | 0 |
| Case 56 | 2 | 187,737,712 | 189,493,686 | 7 | 0 | 7 | 1 |
| Case 56 | 2 | 189,497,420 | 243,048,760 | 1 | 1 | 2 | 0 |

|         |   |             |             |   |   |   |   |
|---------|---|-------------|-------------|---|---|---|---|
| Case 56 | 3 | 61,495      | 761,907     | 2 | 1 | 3 | 0 |
| Case 56 | 3 | 778,709     | 1,238,954   | 2 | 2 | 4 | 0 |
| Case 56 | 3 | 1,247,015   | 19,306,573  | 2 | 1 | 3 | 0 |
| Case 56 | 3 | 19,309,780  | 20,570,373  | 2 | 0 | 2 | 1 |
| Case 56 | 3 | 20,575,986  | 20,764,696  | 3 | 0 | 3 | 1 |
| Case 56 | 3 | 20,766,050  | 21,789,545  | 2 | 0 | 2 | 1 |
| Case 56 | 3 | 21,792,363  | 21,825,247  | 3 | 0 | 3 | 1 |
| Case 56 | 3 | 21,825,971  | 22,532,660  | 2 | 0 | 2 | 1 |
| Case 56 | 3 | 22,535,867  | 23,209,677  | 3 | 0 | 3 | 1 |
| Case 56 | 3 | 23,214,269  | 23,664,029  | 2 | 0 | 2 | 1 |
| Case 56 | 3 | 23,665,996  | 23,825,204  | 3 | 0 | 3 | 1 |
| Case 56 | 3 | 23,839,884  | 24,009,322  | 2 | 0 | 2 | 1 |
| Case 56 | 3 | 24,009,341  | 24,203,529  | 3 | 0 | 3 | 1 |
| Case 56 | 3 | 24,208,974  | 24,538,838  | 2 | 0 | 2 | 1 |
| Case 56 | 3 | 24,554,704  | 24,778,690  | 3 | 0 | 3 | 1 |
| Case 56 | 3 | 24,779,648  | 26,547,966  | 2 | 0 | 2 | 1 |
| Case 56 | 3 | 26,552,078  | 26,963,258  | 3 | 0 | 3 | 1 |
| Case 56 | 3 | 26,976,847  | 27,638,500  | 2 | 0 | 2 | 1 |
| Case 56 | 3 | 27,639,142  | 28,074,885  | 3 | 0 | 3 | 1 |
| Case 56 | 3 | 28,078,786  | 29,620,604  | 2 | 0 | 2 | 1 |
| Case 56 | 3 | 29,622,149  | 29,741,341  | 3 | 0 | 3 | 1 |
| Case 56 | 3 | 29,741,400  | 30,090,772  | 2 | 0 | 2 | 1 |
| Case 56 | 3 | 30,109,355  | 30,197,892  | 3 | 0 | 3 | 1 |
| Case 56 | 3 | 30,200,658  | 31,067,452  | 2 | 0 | 2 | 1 |
| Case 56 | 3 | 31,068,091  | 31,873,214  | 3 | 0 | 3 | 1 |
| Case 56 | 3 | 31,874,014  | 33,192,293  | 2 | 0 | 2 | 1 |
| Case 56 | 3 | 33,194,241  | 33,418,788  | 3 | 0 | 3 | 1 |
| Case 56 | 3 | 33,419,422  | 33,917,150  | 2 | 0 | 2 | 1 |
| Case 56 | 3 | 33,926,125  | 34,086,193  | 3 | 0 | 3 | 1 |
| Case 56 | 3 | 34,094,330  | 37,584,044  | 2 | 0 | 2 | 1 |
| Case 56 | 3 | 37,584,054  | 37,780,809  | 3 | 0 | 3 | 1 |
| Case 56 | 3 | 37,783,832  | 38,411,606  | 2 | 0 | 2 | 1 |
| Case 56 | 3 | 38,411,656  | 38,523,754  | 3 | 0 | 3 | 1 |
| Case 56 | 3 | 38,524,363  | 56,716,992  | 2 | 0 | 2 | 1 |
| Case 56 | 3 | 56,735,180  | 59,876,943  | 2 | 1 | 3 | 0 |
| Case 56 | 3 | 59,877,988  | 60,064,296  | 2 | 2 | 4 | 0 |
| Case 56 | 3 | 60,065,257  | 60,257,587  | 2 | 1 | 3 | 0 |
| Case 56 | 3 | 60,260,223  | 60,321,271  | 1 | 0 | 1 | 0 |
| Case 56 | 3 | 60,327,391  | 60,333,449  | 2 | 1 | 3 | 0 |
| Case 56 | 3 | 60,337,651  | 60,492,136  | 1 | 0 | 1 | 0 |
| Case 56 | 3 | 60,496,077  | 60,566,161  | 2 | 0 | 2 | 1 |
| Case 56 | 3 | 60,566,492  | 60,604,489  | 2 | 1 | 3 | 0 |
| Case 56 | 3 | 60,607,896  | 61,122,318  | 2 | 2 | 4 | 0 |
| Case 56 | 3 | 61,126,821  | 61,126,821  | 2 | 0 | 2 | 1 |
| Case 56 | 3 | 61,127,205  | 61,549,295  | 3 | 2 | 5 | 0 |
| Case 56 | 3 | 61,549,568  | 63,788,094  | 2 | 2 | 4 | 0 |
| Case 56 | 3 | 63,792,326  | 63,999,322  | 2 | 1 | 3 | 0 |
| Case 56 | 3 | 64,004,301  | 65,177,996  | 2 | 2 | 4 | 0 |
| Case 56 | 3 | 65,180,001  | 65,185,849  | 2 | 1 | 3 | 0 |
| Case 56 | 3 | 65,191,847  | 65,214,533  | 1 | 0 | 1 | 0 |
| Case 56 | 3 | 65,215,804  | 66,430,811  | 2 | 2 | 4 | 0 |
| Case 56 | 3 | 66,430,877  | 66,543,696  | 2 | 1 | 3 | 0 |
| Case 56 | 3 | 66,550,756  | 71,174,475  | 2 | 2 | 4 | 0 |
| Case 56 | 3 | 71,174,872  | 71,449,057  | 2 | 1 | 3 | 0 |
| Case 56 | 3 | 71,454,340  | 79,818,831  | 2 | 2 | 4 | 0 |
| Case 56 | 3 | 79,819,713  | 81,247,480  | 2 | 0 | 2 | 1 |
| Case 56 | 3 | 81,251,347  | 90,442,925  | 2 | 2 | 4 | 0 |
| Case 56 | 3 | 93,537,290  | 101,410,553 | 2 | 2 | 4 | 0 |
| Case 56 | 3 | 101,443,528 | 101,545,319 | 2 | 1 | 3 | 0 |
| Case 56 | 3 | 101,546,847 | 108,099,163 | 2 | 2 | 4 | 0 |
| Case 56 | 3 | 108,099,860 | 108,635,060 | 2 | 1 | 3 | 0 |

|         |   |             |             |   |   |   |   |
|---------|---|-------------|-------------|---|---|---|---|
| Case 56 | 3 | 108,635,099 | 111,125,434 | 2 | 2 | 4 | 0 |
| Case 56 | 3 | 111,159,325 | 111,795,976 | 2 | 1 | 3 | 0 |
| Case 56 | 3 | 111,797,617 | 112,643,981 | 2 | 2 | 4 | 0 |
| Case 56 | 3 | 112,647,738 | 112,740,145 | 2 | 1 | 3 | 0 |
| Case 56 | 3 | 112,754,626 | 113,318,748 | 2 | 2 | 4 | 0 |
| Case 56 | 3 | 113,320,312 | 113,560,020 | 2 | 1 | 3 | 0 |
| Case 56 | 3 | 113,561,504 | 113,659,549 | 2 | 2 | 4 | 0 |
| Case 56 | 3 | 113,664,291 | 114,078,257 | 2 | 1 | 3 | 0 |
| Case 56 | 3 | 114,081,006 | 114,081,006 | 2 | 0 | 2 | 1 |
| Case 56 | 3 | 114,085,053 | 114,125,807 | 3 | 2 | 5 | 0 |
| Case 56 | 3 | 114,131,674 | 118,865,332 | 2 | 2 | 4 | 0 |
| Case 56 | 3 | 118,865,479 | 118,906,757 | 2 | 1 | 3 | 0 |
| Case 56 | 3 | 118,906,791 | 121,191,013 | 2 | 2 | 4 | 0 |
| Case 56 | 3 | 121,192,310 | 121,410,773 | 2 | 1 | 3 | 0 |
| Case 56 | 3 | 121,410,850 | 122,914,169 | 2 | 2 | 4 | 0 |
| Case 56 | 3 | 122,915,756 | 123,471,294 | 2 | 1 | 3 | 0 |
| Case 56 | 3 | 123,471,306 | 124,577,826 | 2 | 2 | 4 | 0 |
| Case 56 | 3 | 124,578,125 | 124,909,178 | 2 | 1 | 3 | 0 |
| Case 56 | 3 | 124,909,866 | 125,540,308 | 2 | 2 | 4 | 0 |
| Case 56 | 3 | 125,541,332 | 126,236,523 | 2 | 1 | 3 | 0 |
| Case 56 | 3 | 126,236,546 | 126,669,744 | 2 | 2 | 4 | 0 |
| Case 56 | 3 | 126,674,224 | 126,805,061 | 2 | 1 | 3 | 0 |
| Case 56 | 3 | 126,807,142 | 127,253,904 | 2 | 2 | 4 | 0 |
| Case 56 | 3 | 127,254,061 | 128,666,029 | 2 | 1 | 3 | 0 |
| Case 56 | 3 | 128,666,129 | 128,987,730 | 2 | 2 | 4 | 0 |
| Case 56 | 3 | 128,988,045 | 129,382,355 | 2 | 1 | 3 | 0 |
| Case 56 | 3 | 129,401,505 | 130,405,138 | 2 | 2 | 4 | 0 |
| Case 56 | 3 | 130,409,433 | 131,330,902 | 2 | 1 | 3 | 0 |
| Case 56 | 3 | 131,342,265 | 133,035,774 | 2 | 2 | 4 | 0 |
| Case 56 | 3 | 133,051,572 | 133,189,192 | 2 | 1 | 3 | 0 |
| Case 56 | 3 | 133,189,316 | 133,637,892 | 2 | 2 | 4 | 0 |
| Case 56 | 3 | 133,638,387 | 133,672,549 | 2 | 1 | 3 | 0 |
| Case 56 | 3 | 133,673,940 | 134,043,422 | 2 | 2 | 4 | 0 |
| Case 56 | 3 | 134,043,922 | 134,395,599 | 2 | 1 | 3 | 0 |
| Case 56 | 3 | 134,397,858 | 138,645,013 | 2 | 2 | 4 | 0 |
| Case 56 | 3 | 138,652,077 | 139,355,262 | 2 | 1 | 3 | 0 |
| Case 56 | 3 | 139,356,765 | 140,223,794 | 2 | 2 | 4 | 0 |
| Case 56 | 3 | 140,226,452 | 140,473,526 | 2 | 1 | 3 | 0 |
| Case 56 | 3 | 140,476,375 | 150,127,576 | 2 | 2 | 4 | 0 |
| Case 56 | 3 | 150,127,645 | 150,531,601 | 2 | 1 | 3 | 0 |
| Case 56 | 3 | 150,541,363 | 151,147,968 | 2 | 2 | 4 | 0 |
| Case 56 | 3 | 151,148,099 | 151,166,397 | 2 | 1 | 3 | 0 |
| Case 56 | 3 | 151,166,422 | 153,157,523 | 2 | 2 | 4 | 0 |
| Case 56 | 3 | 153,173,935 | 153,776,149 | 6 | 1 | 7 | 0 |
| Case 56 | 3 | 153,776,628 | 153,902,784 | 4 | 2 | 6 | 0 |
| Case 56 | 3 | 153,907,658 | 154,545,552 | 6 | 1 | 7 | 0 |
| Case 56 | 3 | 154,547,936 | 154,925,064 | 4 | 2 | 6 | 0 |
| Case 56 | 3 | 154,933,041 | 155,196,730 | 6 | 1 | 7 | 0 |
| Case 56 | 3 | 155,198,866 | 155,241,740 | 4 | 2 | 6 | 0 |
| Case 56 | 3 | 155,241,900 | 155,560,337 | 6 | 1 | 7 | 0 |
| Case 56 | 3 | 155,565,687 | 156,292,361 | 5 | 1 | 6 | 0 |
| Case 56 | 3 | 156,295,341 | 156,418,908 | 4 | 2 | 6 | 0 |
| Case 56 | 3 | 156,421,238 | 156,832,984 | 6 | 1 | 7 | 0 |
| Case 56 | 3 | 156,833,616 | 157,920,934 | 5 | 1 | 6 | 0 |
| Case 56 | 3 | 157,920,983 | 157,924,373 | 4 | 2 | 6 | 0 |
| Case 56 | 3 | 157,934,971 | 158,427,059 | 6 | 1 | 7 | 0 |
| Case 56 | 3 | 158,428,589 | 158,870,253 | 5 | 1 | 6 | 0 |
| Case 56 | 3 | 158,873,992 | 159,888,261 | 4 | 2 | 6 | 0 |
| Case 56 | 3 | 159,892,169 | 160,156,040 | 6 | 1 | 7 | 0 |
| Case 56 | 3 | 160,156,046 | 160,481,143 | 5 | 1 | 6 | 0 |
| Case 56 | 3 | 160,499,192 | 161,956,676 | 4 | 2 | 6 | 0 |

|         |   |             |             |   |   |   |   |
|---------|---|-------------|-------------|---|---|---|---|
| Case 56 | 3 | 161,972,497 | 162,396,246 | 6 | 1 | 7 | 0 |
| Case 56 | 3 | 162,397,319 | 163,365,504 | 4 | 2 | 6 | 0 |
| Case 56 | 3 | 163,366,652 | 163,370,769 | 6 | 1 | 7 | 0 |
| Case 56 | 3 | 163,398,158 | 163,664,285 | 5 | 1 | 6 | 0 |
| Case 56 | 3 | 163,671,071 | 163,678,177 | 2 | 0 | 2 | 1 |
| Case 56 | 3 | 163,681,978 | 168,136,690 | 7 | 0 | 7 | 1 |
| Case 56 | 3 | 168,161,589 | 168,161,589 | 2 | 0 | 2 | 1 |
| Case 56 | 3 | 168,162,869 | 168,469,608 | 5 | 1 | 6 | 0 |
| Case 56 | 3 | 168,493,689 | 168,493,689 | 2 | 0 | 2 | 1 |
| Case 56 | 3 | 168,496,750 | 170,133,639 | 7 | 0 | 7 | 1 |
| Case 56 | 3 | 170,136,084 | 170,136,084 | 2 | 0 | 2 | 1 |
| Case 56 | 3 | 170,136,972 | 170,463,622 | 5 | 1 | 6 | 0 |
| Case 56 | 3 | 170,469,336 | 170,491,996 | 4 | 2 | 6 | 0 |
| Case 56 | 3 | 170,494,409 | 171,073,616 | 6 | 1 | 7 | 0 |
| Case 56 | 3 | 171,076,593 | 172,718,955 | 5 | 1 | 6 | 0 |
| Case 56 | 3 | 172,721,786 | 172,845,803 | 4 | 2 | 6 | 0 |
| Case 56 | 3 | 172,851,177 | 173,322,076 | 6 | 1 | 7 | 0 |
| Case 56 | 3 | 173,322,248 | 173,431,705 | 5 | 1 | 6 | 0 |
| Case 56 | 3 | 173,432,639 | 173,432,639 | 2 | 0 | 2 | 1 |
| Case 56 | 3 | 173,438,357 | 173,785,874 | 3 | 2 | 5 | 0 |
| Case 56 | 3 | 173,789,058 | 173,960,436 | 6 | 1 | 7 | 0 |
| Case 56 | 3 | 173,961,129 | 173,967,286 | 5 | 1 | 6 | 0 |
| Case 56 | 3 | 173,971,715 | 174,951,756 | 2 | 0 | 2 | 1 |
| Case 56 | 3 | 174,951,784 | 174,971,516 | 0 | 0 | 0 | 0 |
| Case 56 | 3 | 174,971,696 | 174,980,714 | 1 | 0 | 1 | 0 |
| Case 56 | 3 | 174,985,106 | 175,001,029 | 2 | 1 | 3 | 0 |
| Case 56 | 3 | 175,002,708 | 177,292,543 | 3 | 1 | 4 | 0 |
| Case 56 | 3 | 177,295,215 | 177,295,215 | 2 | 1 | 3 | 0 |
| Case 56 | 3 | 177,297,824 | 177,552,252 | 4 | 1 | 5 | 0 |
| Case 56 | 3 | 177,552,702 | 177,562,035 | 3 | 1 | 4 | 0 |
| Case 56 | 3 | 177,569,911 | 177,569,911 | 2 | 0 | 2 | 1 |
| Case 56 | 3 | 177,581,405 | 178,397,422 | 3 | 2 | 5 | 0 |
| Case 56 | 3 | 178,397,892 | 179,084,046 | 6 | 1 | 7 | 0 |
| Case 56 | 3 | 179,085,791 | 179,085,860 | 5 | 1 | 6 | 0 |
| Case 56 | 3 | 179,090,772 | 179,093,011 | 4 | 1 | 5 | 0 |
| Case 56 | 3 | 179,095,227 | 179,572,539 | 3 | 1 | 4 | 0 |
| Case 56 | 3 | 179,576,912 | 180,334,458 | 7 | 0 | 7 | 1 |
| Case 56 | 3 | 180,337,082 | 180,337,082 | 2 | 0 | 2 | 1 |
| Case 56 | 3 | 180,337,700 | 181,609,741 | 5 | 1 | 6 | 0 |
| Case 56 | 3 | 181,617,660 | 181,617,927 | 2 | 0 | 2 | 1 |
| Case 56 | 3 | 181,629,223 | 181,908,937 | 7 | 0 | 7 | 1 |
| Case 56 | 3 | 181,932,928 | 181,932,928 | 2 | 0 | 2 | 1 |
| Case 56 | 3 | 181,935,178 | 182,055,057 | 3 | 2 | 5 | 0 |
| Case 56 | 3 | 182,080,081 | 182,222,315 | 6 | 1 | 7 | 0 |
| Case 56 | 3 | 182,222,834 | 182,662,324 | 5 | 1 | 6 | 0 |
| Case 56 | 3 | 182,663,516 | 185,795,855 | 4 | 1 | 5 | 0 |
| Case 56 | 3 | 185,797,672 | 188,479,543 | 3 | 1 | 4 | 0 |
| Case 56 | 3 | 188,480,881 | 190,035,814 | 3 | 2 | 5 | 0 |
| Case 56 | 3 | 190,035,825 | 190,036,418 | 2 | 2 | 4 | 0 |
| Case 56 | 3 | 190,037,414 | 193,489,484 | 2 | 0 | 2 | 1 |
| Case 56 | 3 | 193,495,155 | 193,713,770 | 3 | 0 | 3 | 1 |
| Case 56 | 3 | 193,715,150 | 195,310,679 | 2 | 0 | 2 | 1 |
| Case 56 | 3 | 195,424,739 | 195,475,900 | 2 | 2 | 4 | 0 |
| Case 56 | 3 | 195,477,779 | 197,838,262 | 2 | 0 | 2 | 1 |
| Case 56 | 4 | 71,566      | 977,022     | 3 | 0 | 3 | 1 |
| Case 56 | 4 | 981,602     | 985,275     | 2 | 0 | 2 | 1 |
| Case 56 | 4 | 985,295     | 1,990,425   | 3 | 0 | 3 | 1 |
| Case 56 | 4 | 1,991,423   | 49,620,898  | 2 | 0 | 2 | 1 |
| Case 56 | 4 | 52,697,856  | 91,371,416  | 2 | 0 | 2 | 1 |
| Case 56 | 4 | 91,376,378  | 91,748,644  | 0 | 0 | 0 | 0 |
| Case 56 | 4 | 91,762,984  | 122,281,107 | 2 | 0 | 2 | 1 |



|         |   |             |             |   |   |   |   |
|---------|---|-------------|-------------|---|---|---|---|
| Case 56 | 4 | 122,285,263 | 122,289,863 | 0 | 0 | 0 | 0 |
| Case 56 | 4 | 122,291,131 | 124,496,348 | 2 | 0 | 2 | 1 |
| Case 56 | 4 | 124,501,466 | 124,812,897 | 0 | 0 | 0 | 0 |
| Case 56 | 4 | 124,819,109 | 187,538,330 | 2 | 0 | 2 | 1 |
| Case 56 | 4 | 187,538,942 | 187,549,364 | 3 | 0 | 3 | 1 |
| Case 56 | 4 | 187,549,401 | 190,963,766 | 2 | 0 | 2 | 1 |
| Case 56 | 5 | 38,139      | 46,399,093  | 2 | 0 | 2 | 1 |
| Case 56 | 5 | 49,457,282  | 133,944,277 | 2 | 0 | 2 | 1 |
| Case 56 | 5 | 133,959,630 | 139,930,726 | 3 | 0 | 3 | 1 |
| Case 56 | 5 | 139,930,736 | 139,931,384 | 2 | 0 | 2 | 1 |
| Case 56 | 5 | 139,931,607 | 139,931,659 | 0 | 0 | 0 | 0 |
| Case 56 | 5 | 139,931,660 | 139,936,835 | 2 | 0 | 2 | 1 |
| Case 56 | 5 | 139,938,237 | 180,693,127 | 3 | 0 | 3 | 1 |
| Case 56 | 6 | 108,666     | 1,656,487   | 2 | 1 | 3 | 0 |
| Case 56 | 6 | 1,660,002   | 2,145,447   | 1 | 0 | 1 | 0 |
| Case 56 | 6 | 2,168,338   | 47,310,107  | 2 | 1 | 3 | 0 |
| Case 56 | 6 | 47,310,938  | 47,563,608  | 2 | 2 | 4 | 0 |
| Case 56 | 6 | 47,563,669  | 58,752,089  | 2 | 1 | 3 | 0 |
| Case 56 | 6 | 61,891,118  | 62,115,542  | 2 | 1 | 3 | 0 |
| Case 56 | 6 | 62,183,901  | 62,249,159  | 1 | 0 | 1 | 0 |
| Case 56 | 6 | 62,272,667  | 71,035,791  | 2 | 1 | 3 | 0 |
| Case 56 | 6 | 71,037,050  | 74,062,007  | 2 | 2 | 4 | 0 |
| Case 56 | 6 | 74,063,092  | 74,112,709  | 2 | 1 | 3 | 0 |
| Case 56 | 6 | 74,115,413  | 75,848,169  | 2 | 2 | 4 | 0 |
| Case 56 | 6 | 75,848,181  | 76,096,230  | 2 | 1 | 3 | 0 |
| Case 56 | 6 | 76,119,602  | 83,385,150  | 2 | 2 | 4 | 0 |
| Case 56 | 6 | 83,385,527  | 84,108,096  | 2 | 1 | 3 | 0 |
| Case 56 | 6 | 84,108,107  | 87,843,365  | 2 | 2 | 4 | 0 |
| Case 56 | 6 | 87,856,003  | 88,182,439  | 2 | 1 | 3 | 0 |
| Case 56 | 6 | 88,184,912  | 90,300,010  | 2 | 2 | 4 | 0 |
| Case 56 | 6 | 90,310,966  | 90,605,577  | 2 | 1 | 3 | 0 |
| Case 56 | 6 | 90,605,664  | 94,203,034  | 2 | 2 | 4 | 0 |
| Case 56 | 6 | 94,206,244  | 94,511,530  | 2 | 0 | 2 | 1 |
| Case 56 | 6 | 94,529,099  | 94,999,281  | 2 | 2 | 4 | 0 |
| Case 56 | 6 | 95,002,441  | 95,147,994  | 2 | 0 | 2 | 1 |
| Case 56 | 6 | 95,172,841  | 95,278,429  | 2 | 2 | 4 | 0 |
| Case 56 | 6 | 95,285,511  | 95,435,352  | 2 | 0 | 2 | 1 |
| Case 56 | 6 | 95,456,914  | 103,229,346 | 2 | 2 | 4 | 0 |
| Case 56 | 6 | 103,242,059 | 103,403,853 | 2 | 0 | 2 | 1 |
| Case 56 | 6 | 103,434,242 | 109,751,601 | 2 | 2 | 4 | 0 |
| Case 56 | 6 | 109,752,426 | 109,803,216 | 2 | 1 | 3 | 0 |
| Case 56 | 6 | 109,814,411 | 116,394,809 | 2 | 2 | 4 | 0 |
| Case 56 | 6 | 116,406,419 | 116,532,859 | 2 | 1 | 3 | 0 |
| Case 56 | 6 | 116,544,294 | 121,759,439 | 2 | 2 | 4 | 0 |
| Case 56 | 6 | 121,768,449 | 121,768,449 | 2 | 0 | 2 | 1 |
| Case 56 | 6 | 121,768,717 | 122,396,987 | 3 | 2 | 5 | 0 |
| Case 56 | 6 | 122,410,187 | 129,763,368 | 2 | 2 | 4 | 0 |
| Case 56 | 6 | 129,768,893 | 130,091,555 | 2 | 1 | 3 | 0 |
| Case 56 | 6 | 130,091,761 | 132,857,687 | 2 | 2 | 4 | 0 |
| Case 56 | 6 | 132,859,437 | 132,892,143 | 2 | 1 | 3 | 0 |
| Case 56 | 6 | 132,892,152 | 136,506,199 | 2 | 2 | 4 | 0 |
| Case 56 | 6 | 136,508,916 | 136,934,321 | 2 | 1 | 3 | 0 |
| Case 56 | 6 | 136,934,748 | 139,806,747 | 2 | 2 | 4 | 0 |
| Case 56 | 6 | 139,807,600 | 139,984,667 | 2 | 1 | 3 | 0 |
| Case 56 | 6 | 139,989,016 | 146,225,271 | 2 | 2 | 4 | 0 |
| Case 56 | 6 | 146,234,644 | 146,720,826 | 2 | 1 | 3 | 0 |
| Case 56 | 6 | 146,720,966 | 148,584,115 | 2 | 0 | 2 | 1 |
| Case 56 | 6 | 148,585,295 | 148,785,423 | 0 | 0 | 0 | 0 |
| Case 56 | 6 | 148,787,137 | 154,717,442 | 2 | 0 | 2 | 1 |
| Case 56 | 6 | 154,719,380 | 155,078,641 | 3 | 0 | 3 | 1 |
| Case 56 | 6 | 155,092,199 | 157,219,303 | 2 | 0 | 2 | 1 |

|         |   |             |             |   |   |   |   |
|---------|---|-------------|-------------|---|---|---|---|
| Case 56 | 6 | 157,223,707 | 157,223,707 | 0 | 0 | 0 | 0 |
| Case 56 | 6 | 157,232,519 | 157,445,999 | 1 | 0 | 1 | 0 |
| Case 56 | 6 | 157,449,208 | 159,029,734 | 2 | 0 | 2 | 1 |
| Case 56 | 6 | 159,032,670 | 159,184,512 | 3 | 0 | 3 | 1 |
| Case 56 | 6 | 159,185,547 | 162,565,718 | 2 | 0 | 2 | 1 |
| Case 56 | 6 | 162,568,613 | 162,568,613 | 0 | 0 | 0 | 0 |
| Case 56 | 6 | 162,569,008 | 162,778,346 | 1 | 0 | 1 | 0 |
| Case 56 | 6 | 162,779,151 | 162,820,114 | 2 | 0 | 2 | 1 |
| Case 56 | 6 | 162,828,829 | 163,072,782 | 0 | 0 | 0 | 0 |
| Case 56 | 6 | 163,081,812 | 170,980,171 | 2 | 0 | 2 | 1 |
| Case 56 | 7 | 44,935      | 58,019,061  | 2 | 1 | 3 | 0 |
| Case 56 | 7 | 61,056,053  | 86,741,039  | 2 | 1 | 3 | 0 |
| Case 56 | 7 | 86,751,525  | 86,820,275  | 2 | 0 | 2 | 1 |
| Case 56 | 7 | 86,821,980  | 90,014,777  | 2 | 1 | 3 | 0 |
| Case 56 | 7 | 90,015,825  | 90,860,351  | 3 | 1 | 4 | 0 |
| Case 56 | 7 | 90,862,407  | 91,167,397  | 4 | 1 | 5 | 0 |
| Case 56 | 7 | 91,167,602  | 91,509,551  | 3 | 1 | 4 | 0 |
| Case 56 | 7 | 91,509,608  | 111,297,991 | 2 | 1 | 3 | 0 |
| Case 56 | 7 | 111,309,224 | 111,339,228 | 1 | 0 | 1 | 0 |
| Case 56 | 7 | 111,353,361 | 116,552,181 | 2 | 1 | 3 | 0 |
| Case 56 | 7 | 116,558,716 | 116,577,942 | 4 | 1 | 5 | 0 |
| Case 56 | 7 | 116,593,611 | 116,604,194 | 3 | 1 | 4 | 0 |
| Case 56 | 7 | 116,635,048 | 133,733,917 | 2 | 1 | 3 | 0 |
| Case 56 | 7 | 133,735,533 | 133,774,841 | 2 | 0 | 2 | 1 |
| Case 56 | 7 | 133,803,962 | 149,486,246 | 2 | 1 | 3 | 0 |
| Case 56 | 7 | 149,486,256 | 149,488,991 | 2 | 0 | 2 | 1 |
| Case 56 | 7 | 149,489,048 | 149,513,846 | 2 | 1 | 3 | 0 |
| Case 56 | 7 | 149,514,716 | 149,520,478 | 2 | 0 | 2 | 1 |
| Case 56 | 7 | 149,520,552 | 158,050,239 | 2 | 1 | 3 | 0 |
| Case 56 | 7 | 158,050,807 | 158,053,180 | 3 | 1 | 4 | 0 |
| Case 56 | 7 | 158,060,317 | 158,376,086 | 1 | 1 | 2 | 0 |
| Case 56 | 7 | 158,389,294 | 159,119,486 | 2 | 1 | 3 | 0 |
| Case 56 | 8 | 164,984     | 5,593,810   | 2 | 0 | 2 | 1 |
| Case 56 | 8 | 5,599,399   | 5,604,495   | 0 | 0 | 0 | 0 |
| Case 56 | 8 | 5,605,087   | 15,751,859  | 2 | 0 | 2 | 1 |
| Case 56 | 8 | 15,752,089  | 15,765,369  | 0 | 0 | 0 | 0 |
| Case 56 | 8 | 15,767,521  | 43,791,691  | 2 | 0 | 2 | 1 |
| Case 56 | 8 | 46,886,735  | 96,576,196  | 2 | 0 | 2 | 1 |
| Case 56 | 8 | 96,582,595  | 96,596,749  | 0 | 0 | 0 | 0 |
| Case 56 | 8 | 96,620,404  | 123,822,629 | 2 | 0 | 2 | 1 |
| Case 56 | 8 | 123,827,049 | 123,980,697 | 3 | 0 | 3 | 1 |
| Case 56 | 8 | 123,983,143 | 126,230,230 | 2 | 0 | 2 | 1 |
| Case 56 | 8 | 126,254,259 | 133,931,769 | 7 | 0 | 7 | 1 |
| Case 56 | 8 | 133,935,591 | 146,293,414 | 2 | 0 | 2 | 1 |
| Case 56 | 9 | 46,587      | 8,636,818   | 2 | 0 | 2 | 1 |
| Case 56 | 9 | 8,645,448   | 8,799,819   | 0 | 0 | 0 | 0 |
| Case 56 | 9 | 8,805,462   | 9,195,670   | 2 | 0 | 2 | 1 |
| Case 56 | 9 | 9,196,661   | 9,196,661   | 0 | 0 | 0 | 0 |
| Case 56 | 9 | 9,197,160   | 9,249,912   | 1 | 0 | 1 | 0 |
| Case 56 | 9 | 9,252,865   | 9,252,865   | 2 | 0 | 2 | 1 |
| Case 56 | 9 | 9,258,729   | 9,456,615   | 0 | 0 | 0 | 0 |
| Case 56 | 9 | 9,459,099   | 9,539,114   | 1 | 0 | 1 | 0 |
| Case 56 | 9 | 9,540,141   | 9,540,141   | 2 | 0 | 2 | 1 |
| Case 56 | 9 | 9,548,257   | 9,736,252   | 0 | 0 | 0 | 0 |
| Case 56 | 9 | 9,740,949   | 46,944,322  | 2 | 0 | 2 | 1 |
| Case 56 | 9 | 65,629,772  | 94,455,171  | 2 | 0 | 2 | 1 |
| Case 56 | 9 | 94,456,714  | 94,631,630  | 3 | 0 | 3 | 1 |
| Case 56 | 9 | 94,631,730  | 117,840,922 | 2 | 0 | 2 | 1 |
| Case 56 | 9 | 117,841,416 | 118,131,550 | 3 | 0 | 3 | 1 |
| Case 56 | 9 | 118,137,835 | 123,476,303 | 2 | 0 | 2 | 1 |
| Case 56 | 9 | 123,480,696 | 123,822,837 | 3 | 0 | 3 | 1 |

|         |    |             |             |   |   |   |   |
|---------|----|-------------|-------------|---|---|---|---|
| Case 56 | 9  | 123,823,972 | 141,066,491 | 2 | 0 | 2 | 1 |
| Case 56 | 10 | 98,087      | 6,975,550   | 2 | 0 | 2 | 1 |
| Case 56 | 10 | 6,977,250   | 6,985,007   | 0 | 0 | 0 | 0 |
| Case 56 | 10 | 6,993,426   | 37,327,040  | 2 | 0 | 2 | 1 |
| Case 56 | 10 | 37,341,389  | 37,467,445  | 3 | 2 | 5 | 0 |
| Case 56 | 10 | 37,479,884  | 37,665,513  | 6 | 1 | 7 | 0 |
| Case 56 | 10 | 37,665,810  | 37,703,778  | 5 | 1 | 6 | 0 |
| Case 56 | 10 | 37,704,970  | 37,704,970  | 2 | 0 | 2 | 1 |
| Case 56 | 10 | 37,706,195  | 38,061,643  | 7 | 0 | 7 | 1 |
| Case 56 | 10 | 38,108,080  | 38,108,080  | 2 | 0 | 2 | 1 |
| Case 56 | 10 | 38,110,813  | 38,276,810  | 2 | 2 | 4 | 0 |
| Case 56 | 10 | 38,290,878  | 38,290,878  | 2 | 1 | 3 | 0 |
| Case 56 | 10 | 38,299,132  | 39,070,516  | 7 | 0 | 7 | 1 |
| Case 56 | 10 | 39,088,829  | 39,097,912  | 1 | 1 | 2 | 0 |
| Case 56 | 10 | 42,436,301  | 42,896,183  | 2 | 1 | 3 | 0 |
| Case 56 | 10 | 42,905,057  | 42,907,260  | 1 | 0 | 1 | 0 |
| Case 56 | 10 | 42,916,042  | 43,070,825  | 2 | 0 | 2 | 1 |
| Case 56 | 10 | 43,073,561  | 84,213,251  | 2 | 1 | 3 | 0 |
| Case 56 | 10 | 84,218,664  | 84,267,826  | 1 | 0 | 1 | 0 |
| Case 56 | 10 | 84,279,949  | 85,445,507  | 2 | 1 | 3 | 0 |
| Case 56 | 10 | 85,449,661  | 85,936,245  | 1 | 0 | 1 | 0 |
| Case 56 | 10 | 85,936,688  | 85,980,895  | 2 | 0 | 2 | 1 |
| Case 56 | 10 | 85,981,756  | 85,981,821  | 0 | 0 | 0 | 0 |
| Case 56 | 10 | 85,982,223  | 86,815,074  | 1 | 0 | 1 | 0 |
| Case 56 | 10 | 86,820,708  | 89,294,408  | 2 | 0 | 2 | 1 |
| Case 56 | 10 | 89,300,314  | 89,343,804  | 0 | 0 | 0 | 0 |
| Case 56 | 10 | 89,352,346  | 89,380,317  | 1 | 0 | 1 | 0 |
| Case 56 | 10 | 89,380,699  | 89,380,699  | 2 | 0 | 2 | 1 |
| Case 56 | 10 | 89,380,806  | 89,782,386  | 0 | 0 | 0 | 0 |
| Case 56 | 10 | 89,784,717  | 89,897,044  | 1 | 0 | 1 | 0 |
| Case 56 | 10 | 89,898,756  | 89,898,756  | 2 | 0 | 2 | 1 |
| Case 56 | 10 | 89,899,843  | 90,195,149  | 0 | 0 | 0 | 0 |
| Case 56 | 10 | 90,198,999  | 91,129,012  | 1 | 0 | 1 | 0 |
| Case 56 | 10 | 91,134,786  | 91,163,228  | 2 | 0 | 2 | 1 |
| Case 56 | 10 | 91,163,743  | 91,163,743  | 0 | 0 | 0 | 0 |
| Case 56 | 10 | 91,164,170  | 91,484,779  | 1 | 0 | 1 | 0 |
| Case 56 | 10 | 91,484,780  | 91,484,780  | 0 | 0 | 0 | 0 |
| Case 56 | 10 | 91,484,796  | 91,484,835  | 2 | 0 | 2 | 1 |
| Case 56 | 10 | 91,487,648  | 91,498,808  | 0 | 0 | 0 | 0 |
| Case 56 | 10 | 91,503,578  | 94,967,076  | 1 | 0 | 1 | 0 |
| Case 56 | 10 | 94,968,216  | 95,212,070  | 2 | 0 | 2 | 1 |
| Case 56 | 10 | 95,213,371  | 95,213,371  | 0 | 0 | 0 | 0 |
| Case 56 | 10 | 95,216,623  | 95,777,231  | 1 | 0 | 1 | 0 |
| Case 56 | 10 | 95,777,488  | 96,086,078  | 2 | 0 | 2 | 1 |
| Case 56 | 10 | 96,093,279  | 96,093,965  | 0 | 0 | 0 | 0 |
| Case 56 | 10 | 96,094,413  | 97,020,612  | 1 | 0 | 1 | 0 |
| Case 56 | 10 | 97,021,389  | 97,402,883  | 2 | 0 | 2 | 1 |
| Case 56 | 10 | 97,402,930  | 97,406,406  | 0 | 0 | 0 | 0 |
| Case 56 | 10 | 97,408,603  | 98,064,363  | 1 | 0 | 1 | 0 |
| Case 56 | 10 | 98,072,541  | 98,097,944  | 2 | 0 | 2 | 1 |
| Case 56 | 10 | 98,103,376  | 103,205,272 | 2 | 1 | 3 | 0 |
| Case 56 | 10 | 103,228,836 | 103,436,164 | 2 | 0 | 2 | 1 |
| Case 56 | 10 | 103,445,325 | 135,477,883 | 2 | 1 | 3 | 0 |
| Case 56 | 11 | 193,146     | 51,525,878  | 2 | 0 | 2 | 1 |
| Case 56 | 11 | 51,566,909  | 51,591,253  | 0 | 0 | 0 | 0 |
| Case 56 | 11 | 54,794,237  | 59,189,522  | 2 | 0 | 2 | 1 |
| Case 56 | 11 | 59,189,660  | 59,239,839  | 3 | 0 | 3 | 1 |
| Case 56 | 11 | 59,240,474  | 74,050,173  | 2 | 0 | 2 | 1 |
| Case 56 | 11 | 74,053,547  | 74,329,833  | 2 | 2 | 4 | 0 |
| Case 56 | 11 | 74,329,841  | 74,915,566  | 2 | 1 | 3 | 0 |
| Case 56 | 11 | 74,915,572  | 75,223,565  | 2 | 2 | 4 | 0 |

|         |    |             |             |   |   |   |   |
|---------|----|-------------|-------------|---|---|---|---|
| Case 56 | 11 | 75,228,884  | 75,319,218  | 2 | 1 | 3 | 0 |
| Case 56 | 11 | 75,320,105  | 75,428,958  | 2 | 2 | 4 | 0 |
| Case 56 | 11 | 75,428,971  | 75,742,818  | 2 | 1 | 3 | 0 |
| Case 56 | 11 | 75,756,145  | 76,359,922  | 2 | 2 | 4 | 0 |
| Case 56 | 11 | 76,359,949  | 76,834,830  | 2 | 1 | 3 | 0 |
| Case 56 | 11 | 76,834,837  | 77,727,379  | 2 | 2 | 4 | 0 |
| Case 56 | 11 | 77,727,825  | 78,270,665  | 2 | 1 | 3 | 0 |
| Case 56 | 11 | 78,277,260  | 84,474,461  | 2 | 2 | 4 | 0 |
| Case 56 | 11 | 84,494,810  | 84,688,062  | 2 | 0 | 2 | 1 |
| Case 56 | 11 | 84,691,990  | 93,787,542  | 2 | 2 | 4 | 0 |
| Case 56 | 11 | 93,787,758  | 94,110,284  | 2 | 1 | 3 | 0 |
| Case 56 | 11 | 94,111,170  | 111,345,971 | 2 | 2 | 4 | 0 |
| Case 56 | 11 | 111,346,465 | 111,896,251 | 2 | 1 | 3 | 0 |
| Case 56 | 11 | 111,896,324 | 113,141,684 | 2 | 2 | 4 | 0 |
| Case 56 | 11 | 113,142,503 | 113,316,236 | 2 | 1 | 3 | 0 |
| Case 56 | 11 | 113,317,067 | 113,973,184 | 2 | 2 | 4 | 0 |
| Case 56 | 11 | 113,974,100 | 114,064,733 | 2 | 1 | 3 | 0 |
| Case 56 | 11 | 114,066,438 | 116,253,844 | 2 | 2 | 4 | 0 |
| Case 56 | 11 | 116,255,458 | 116,358,711 | 2 | 1 | 3 | 0 |
| Case 56 | 11 | 116,363,446 | 116,617,240 | 2 | 2 | 4 | 0 |
| Case 56 | 11 | 116,619,051 | 117,309,989 | 2 | 1 | 3 | 0 |
| Case 56 | 11 | 117,310,107 | 117,521,967 | 2 | 2 | 4 | 0 |
| Case 56 | 11 | 117,522,956 | 118,133,741 | 2 | 1 | 3 | 0 |
| Case 56 | 11 | 118,134,785 | 118,342,617 | 2 | 2 | 4 | 0 |
| Case 56 | 11 | 118,343,378 | 119,290,776 | 2 | 1 | 3 | 0 |
| Case 56 | 11 | 119,291,480 | 119,968,219 | 2 | 2 | 4 | 0 |
| Case 56 | 11 | 119,970,300 | 120,403,333 | 2 | 1 | 3 | 0 |
| Case 56 | 11 | 120,405,843 | 120,659,485 | 2 | 2 | 4 | 0 |
| Case 56 | 11 | 120,663,363 | 120,972,161 | 2 | 1 | 3 | 0 |
| Case 56 | 11 | 120,972,518 | 121,329,041 | 2 | 2 | 4 | 0 |
| Case 56 | 11 | 121,330,087 | 121,533,001 | 2 | 1 | 3 | 0 |
| Case 56 | 11 | 121,533,827 | 123,983,579 | 2 | 2 | 4 | 0 |
| Case 56 | 11 | 123,987,875 | 124,413,198 | 2 | 1 | 3 | 0 |
| Case 56 | 11 | 124,413,214 | 124,440,043 | 2 | 2 | 4 | 0 |
| Case 56 | 11 | 124,440,068 | 124,813,516 | 2 | 1 | 3 | 0 |
| Case 56 | 11 | 124,813,669 | 125,438,421 | 2 | 2 | 4 | 0 |
| Case 56 | 11 | 125,440,779 | 125,618,370 | 2 | 1 | 3 | 0 |
| Case 56 | 11 | 125,618,495 | 125,777,056 | 2 | 2 | 4 | 0 |
| Case 56 | 11 | 125,778,184 | 125,893,275 | 2 | 1 | 3 | 0 |
| Case 56 | 11 | 125,895,397 | 126,008,932 | 2 | 2 | 4 | 0 |
| Case 56 | 11 | 126,009,142 | 126,412,048 | 2 | 1 | 3 | 0 |
| Case 56 | 11 | 126,412,343 | 128,330,520 | 2 | 2 | 4 | 0 |
| Case 56 | 11 | 128,333,215 | 128,398,309 | 2 | 1 | 3 | 0 |
| Case 56 | 11 | 128,409,210 | 129,663,037 | 2 | 2 | 4 | 0 |
| Case 56 | 11 | 129,666,638 | 130,088,828 | 2 | 1 | 3 | 0 |
| Case 56 | 11 | 130,089,026 | 130,861,244 | 2 | 2 | 4 | 0 |
| Case 56 | 11 | 130,867,460 | 131,085,448 | 2 | 1 | 3 | 0 |
| Case 56 | 11 | 131,085,554 | 133,923,605 | 2 | 2 | 4 | 0 |
| Case 56 | 11 | 133,924,689 | 134,182,345 | 2 | 1 | 3 | 0 |
| Case 56 | 11 | 134,182,360 | 134,934,063 | 2 | 2 | 4 | 0 |
| Case 56 | 12 | 191,619     | 18,120,791  | 2 | 0 | 2 | 1 |
| Case 56 | 12 | 18,128,339  | 18,544,186  | 4 | 0 | 4 | 1 |
| Case 56 | 12 | 18,552,594  | 27,416,768  | 2 | 0 | 2 | 1 |
| Case 56 | 12 | 27,422,886  | 30,010,180  | 3 | 2 | 5 | 0 |
| Case 56 | 12 | 30,013,127  | 30,814,184  | 2 | 2 | 4 | 0 |
| Case 56 | 12 | 30,816,483  | 30,955,156  | 2 | 1 | 3 | 0 |
| Case 56 | 12 | 30,955,572  | 31,088,854  | 2 | 2 | 4 | 0 |
| Case 56 | 12 | 31,089,672  | 31,142,615  | 2 | 1 | 3 | 0 |
| Case 56 | 12 | 31,143,633  | 34,853,011  | 2 | 2 | 4 | 0 |
| Case 56 | 12 | 37,876,400  | 42,027,870  | 2 | 2 | 4 | 0 |
| Case 56 | 12 | 42,030,041  | 42,244,754  | 2 | 0 | 2 | 1 |

|         |    |             |             |   |   |   |   |
|---------|----|-------------|-------------|---|---|---|---|
| Case 56 | 12 | 42,246,534  | 48,062,824  | 2 | 2 | 4 | 0 |
| Case 56 | 12 | 48,063,926  | 48,192,630  | 2 | 1 | 3 | 0 |
| Case 56 | 12 | 48,195,069  | 48,367,976  | 2 | 2 | 4 | 0 |
| Case 56 | 12 | 48,368,041  | 49,255,829  | 2 | 1 | 3 | 0 |
| Case 56 | 12 | 49,256,792  | 49,368,633  | 2 | 2 | 4 | 0 |
| Case 56 | 12 | 49,370,857  | 49,455,935  | 2 | 1 | 3 | 0 |
| Case 56 | 12 | 49,457,635  | 49,645,240  | 2 | 2 | 4 | 0 |
| Case 56 | 12 | 49,655,598  | 50,749,227  | 2 | 1 | 3 | 0 |
| Case 56 | 12 | 50,749,294  | 51,561,056  | 2 | 2 | 4 | 0 |
| Case 56 | 12 | 51,566,350  | 52,329,769  | 2 | 1 | 3 | 0 |
| Case 56 | 12 | 52,331,681  | 52,618,791  | 2 | 2 | 4 | 0 |
| Case 56 | 12 | 52,622,287  | 52,842,101  | 2 | 1 | 3 | 0 |
| Case 56 | 12 | 52,842,631  | 52,908,254  | 2 | 2 | 4 | 0 |
| Case 56 | 12 | 52,908,473  | 53,917,068  | 2 | 1 | 3 | 0 |
| Case 56 | 12 | 53,924,293  | 54,317,719  | 2 | 2 | 4 | 0 |
| Case 56 | 12 | 54,318,146  | 54,928,634  | 2 | 1 | 3 | 0 |
| Case 56 | 12 | 54,928,894  | 55,846,794  | 2 | 2 | 4 | 0 |
| Case 56 | 12 | 55,846,890  | 56,828,056  | 2 | 1 | 3 | 0 |
| Case 56 | 12 | 56,828,818  | 57,109,931  | 2 | 2 | 4 | 0 |
| Case 56 | 12 | 57,109,961  | 58,396,973  | 2 | 1 | 3 | 0 |
| Case 56 | 12 | 58,403,744  | 65,677,700  | 2 | 2 | 4 | 0 |
| Case 56 | 12 | 65,680,026  | 67,009,240  | 2 | 0 | 2 | 1 |
| Case 56 | 12 | 67,015,716  | 68,652,532  | 2 | 2 | 4 | 0 |
| Case 56 | 12 | 68,654,215  | 73,715,732  | 2 | 0 | 2 | 1 |
| Case 56 | 12 | 73,737,815  | 73,818,580  | 2 | 2 | 4 | 0 |
| Case 56 | 12 | 73,828,862  | 74,596,252  | 2 | 0 | 2 | 1 |
| Case 56 | 12 | 74,601,949  | 86,518,790  | 2 | 2 | 4 | 0 |
| Case 56 | 12 | 86,529,854  | 87,064,494  | 2 | 0 | 2 | 1 |
| Case 56 | 12 | 87,070,220  | 87,414,468  | 2 | 2 | 4 | 0 |
| Case 56 | 12 | 87,430,209  | 88,381,701  | 2 | 0 | 2 | 1 |
| Case 56 | 12 | 88,383,119  | 90,295,893  | 2 | 2 | 4 | 0 |
| Case 56 | 12 | 90,304,545  | 93,125,065  | 2 | 0 | 2 | 1 |
| Case 56 | 12 | 93,128,881  | 93,951,607  | 2 | 2 | 4 | 0 |
| Case 56 | 12 | 93,958,657  | 94,207,194  | 2 | 1 | 3 | 0 |
| Case 56 | 12 | 94,207,294  | 97,577,947  | 2 | 2 | 4 | 0 |
| Case 56 | 12 | 97,579,740  | 98,551,559  | 2 | 0 | 2 | 1 |
| Case 56 | 12 | 98,552,353  | 104,063,090 | 2 | 2 | 4 | 0 |
| Case 56 | 12 | 104,064,489 | 104,139,020 | 2 | 1 | 3 | 0 |
| Case 56 | 12 | 104,139,034 | 104,219,814 | 2 | 2 | 4 | 0 |
| Case 56 | 12 | 104,221,850 | 104,487,178 | 2 | 1 | 3 | 0 |
| Case 56 | 12 | 104,487,183 | 105,433,077 | 2 | 2 | 4 | 0 |
| Case 56 | 12 | 105,433,542 | 105,616,970 | 2 | 1 | 3 | 0 |
| Case 56 | 12 | 105,622,913 | 105,712,603 | 7 | 0 | 7 | 1 |
| Case 56 | 12 | 105,713,218 | 105,713,218 | 2 | 0 | 2 | 1 |
| Case 56 | 12 | 105,719,138 | 106,623,457 | 2 | 2 | 4 | 0 |
| Case 56 | 12 | 106,623,777 | 106,740,246 | 2 | 1 | 3 | 0 |
| Case 56 | 12 | 106,740,267 | 108,472,383 | 2 | 2 | 4 | 0 |
| Case 56 | 12 | 108,472,527 | 108,746,540 | 2 | 1 | 3 | 0 |
| Case 56 | 12 | 108,750,121 | 108,874,395 | 2 | 2 | 4 | 0 |
| Case 56 | 12 | 108,874,663 | 109,221,123 | 2 | 1 | 3 | 0 |
| Case 56 | 12 | 109,221,168 | 109,526,201 | 2 | 2 | 4 | 0 |
| Case 56 | 12 | 109,526,230 | 109,725,707 | 2 | 1 | 3 | 0 |
| Case 56 | 12 | 109,726,560 | 110,205,831 | 2 | 2 | 4 | 0 |
| Case 56 | 12 | 110,206,012 | 111,353,556 | 2 | 1 | 3 | 0 |
| Case 56 | 12 | 111,355,091 | 111,716,718 | 2 | 2 | 4 | 0 |
| Case 56 | 12 | 111,722,196 | 112,230,413 | 2 | 1 | 3 | 0 |
| Case 56 | 12 | 112,230,515 | 113,523,505 | 2 | 2 | 4 | 0 |
| Case 56 | 12 | 113,528,588 | 114,169,390 | 2 | 1 | 3 | 0 |
| Case 56 | 12 | 114,169,592 | 115,102,961 | 2 | 2 | 4 | 0 |
| Case 56 | 12 | 115,110,028 | 115,353,849 | 2 | 1 | 3 | 0 |
| Case 56 | 12 | 115,360,866 | 115,678,310 | 2 | 2 | 4 | 0 |

|         |    |             |             |   |   |   |   |
|---------|----|-------------|-------------|---|---|---|---|
| Case 56 | 12 | 115,680,290 | 116,063,191 | 2 | 1 | 3 | 0 |
| Case 56 | 12 | 116,067,844 | 116,408,538 | 2 | 2 | 4 | 0 |
| Case 56 | 12 | 116,421,024 | 116,460,307 | 2 | 1 | 3 | 0 |
| Case 56 | 12 | 116,474,353 | 117,150,050 | 2 | 2 | 4 | 0 |
| Case 56 | 12 | 117,153,263 | 117,549,739 | 2 | 1 | 3 | 0 |
| Case 56 | 12 | 117,557,799 | 118,441,838 | 2 | 2 | 4 | 0 |
| Case 56 | 12 | 118,449,542 | 118,888,731 | 2 | 1 | 3 | 0 |
| Case 56 | 12 | 118,889,196 | 119,814,778 | 2 | 2 | 4 | 0 |
| Case 56 | 12 | 119,817,228 | 119,985,871 | 2 | 1 | 3 | 0 |
| Case 56 | 12 | 119,986,882 | 120,058,092 | 2 | 2 | 4 | 0 |
| Case 56 | 12 | 120,060,108 | 121,240,862 | 2 | 1 | 3 | 0 |
| Case 56 | 12 | 121,242,102 | 121,448,918 | 2 | 2 | 4 | 0 |
| Case 56 | 12 | 121,454,148 | 121,598,766 | 2 | 1 | 3 | 0 |
| Case 56 | 12 | 121,600,238 | 121,950,655 | 2 | 2 | 4 | 0 |
| Case 56 | 12 | 121,951,102 | 125,497,102 | 2 | 1 | 3 | 0 |
| Case 56 | 12 | 125,497,128 | 128,767,084 | 2 | 2 | 4 | 0 |
| Case 56 | 12 | 128,768,870 | 132,405,748 | 2 | 0 | 2 | 1 |
| Case 56 | 12 | 132,405,765 | 133,810,935 | 2 | 1 | 3 | 0 |
| Case 56 | 13 | 19,058,717  | 20,906,284  | 2 | 0 | 2 | 1 |
| Case 56 | 13 | 20,910,048  | 21,007,342  | 3 | 0 | 3 | 1 |
| Case 56 | 13 | 21,013,995  | 21,725,633  | 2 | 0 | 2 | 1 |
| Case 56 | 13 | 21,728,755  | 21,746,637  | 2 | 1 | 3 | 0 |
| Case 56 | 13 | 21,747,051  | 115,103,529 | 2 | 0 | 2 | 1 |
| Case 56 | 14 | 19,280,733  | 20,404,736  | 2 | 1 | 3 | 0 |
| Case 56 | 14 | 20,416,499  | 20,841,162  | 2 | 2 | 4 | 0 |
| Case 56 | 14 | 20,841,193  | 20,876,621  | 2 | 1 | 3 | 0 |
| Case 56 | 14 | 20,879,311  | 21,424,041  | 2 | 2 | 4 | 0 |
| Case 56 | 14 | 21,424,117  | 21,503,551  | 2 | 1 | 3 | 0 |
| Case 56 | 14 | 21,503,795  | 21,792,781  | 2 | 2 | 4 | 0 |
| Case 56 | 14 | 21,792,807  | 22,058,329  | 2 | 1 | 3 | 0 |
| Case 56 | 14 | 22,069,068  | 23,041,057  | 2 | 2 | 4 | 0 |
| Case 56 | 14 | 23,041,489  | 23,392,270  | 2 | 1 | 3 | 0 |
| Case 56 | 14 | 23,393,548  | 23,495,443  | 2 | 2 | 4 | 0 |
| Case 56 | 14 | 23,502,746  | 24,908,184  | 2 | 1 | 3 | 0 |
| Case 56 | 14 | 24,908,266  | 40,863,544  | 2 | 2 | 4 | 0 |
| Case 56 | 14 | 40,864,467  | 40,964,161  | 2 | 1 | 3 | 0 |
| Case 56 | 14 | 40,964,560  | 50,009,589  | 2 | 2 | 4 | 0 |
| Case 56 | 14 | 50,012,325  | 50,251,694  | 2 | 1 | 3 | 0 |
| Case 56 | 14 | 50,251,957  | 51,223,460  | 2 | 2 | 4 | 0 |
| Case 56 | 14 | 51,223,789  | 51,245,506  | 2 | 1 | 3 | 0 |
| Case 56 | 14 | 51,245,666  | 51,343,599  | 2 | 2 | 4 | 0 |
| Case 56 | 14 | 51,345,537  | 51,492,961  | 2 | 1 | 3 | 0 |
| Case 56 | 14 | 51,494,228  | 52,452,574  | 2 | 2 | 4 | 0 |
| Case 56 | 14 | 52,454,987  | 52,742,714  | 2 | 1 | 3 | 0 |
| Case 56 | 14 | 52,748,462  | 59,825,872  | 2 | 2 | 4 | 0 |
| Case 56 | 14 | 59,826,182  | 60,087,910  | 2 | 1 | 3 | 0 |
| Case 56 | 14 | 60,092,082  | 64,676,162  | 2 | 2 | 4 | 0 |
| Case 56 | 14 | 64,676,760  | 64,692,110  | 2 | 1 | 3 | 0 |
| Case 56 | 14 | 64,692,465  | 65,159,685  | 2 | 2 | 4 | 0 |
| Case 56 | 14 | 65,160,584  | 65,270,718  | 2 | 1 | 3 | 0 |
| Case 56 | 14 | 65,270,763  | 68,035,439  | 2 | 2 | 4 | 0 |
| Case 56 | 14 | 68,035,879  | 68,060,375  | 2 | 1 | 3 | 0 |
| Case 56 | 14 | 68,065,034  | 68,235,303  | 2 | 2 | 4 | 0 |
| Case 56 | 14 | 68,236,320  | 68,352,648  | 2 | 1 | 3 | 0 |
| Case 56 | 14 | 68,352,656  | 69,434,387  | 2 | 2 | 4 | 0 |
| Case 56 | 14 | 69,438,984  | 69,820,414  | 2 | 1 | 3 | 0 |
| Case 56 | 14 | 69,820,946  | 70,049,125  | 2 | 2 | 4 | 0 |
| Case 56 | 14 | 70,054,406  | 70,364,372  | 2 | 1 | 3 | 0 |
| Case 56 | 14 | 70,366,409  | 71,197,570  | 2 | 2 | 4 | 0 |
| Case 56 | 14 | 71,197,581  | 71,258,159  | 2 | 1 | 3 | 0 |
| Case 56 | 14 | 71,260,091  | 72,941,207  | 2 | 2 | 4 | 0 |

|         |    |             |             |   |   |   |   |
|---------|----|-------------|-------------|---|---|---|---|
| Case 56 | 14 | 72,941,379  | 72,996,075  | 2 | 1 | 3 | 0 |
| Case 56 | 14 | 73,006,255  | 73,316,539  | 2 | 2 | 4 | 0 |
| Case 56 | 14 | 73,317,850  | 74,235,727  | 2 | 1 | 3 | 0 |
| Case 56 | 14 | 74,241,688  | 74,245,607  | 1 | 0 | 1 | 0 |
| Case 56 | 14 | 74,249,810  | 74,360,573  | 2 | 2 | 4 | 0 |
| Case 56 | 14 | 74,363,031  | 74,727,582  | 2 | 1 | 3 | 0 |
| Case 56 | 14 | 74,728,201  | 74,954,327  | 2 | 2 | 4 | 0 |
| Case 56 | 14 | 74,956,568  | 75,415,262  | 2 | 1 | 3 | 0 |
| Case 56 | 14 | 75,416,199  | 76,088,479  | 2 | 2 | 4 | 0 |
| Case 56 | 14 | 76,090,978  | 76,372,254  | 2 | 1 | 3 | 0 |
| Case 56 | 14 | 76,373,861  | 77,236,328  | 2 | 2 | 4 | 0 |
| Case 56 | 14 | 77,236,380  | 77,297,139  | 2 | 1 | 3 | 0 |
| Case 56 | 14 | 77,297,641  | 77,625,775  | 2 | 2 | 4 | 0 |
| Case 56 | 14 | 77,628,472  | 78,416,194  | 2 | 1 | 3 | 0 |
| Case 56 | 14 | 78,421,058  | 78,573,729  | 2 | 2 | 4 | 0 |
| Case 56 | 14 | 78,573,899  | 78,750,987  | 2 | 1 | 3 | 0 |
| Case 56 | 14 | 78,757,435  | 88,651,913  | 2 | 2 | 4 | 0 |
| Case 56 | 14 | 88,651,919  | 88,715,527  | 2 | 1 | 3 | 0 |
| Case 56 | 14 | 88,719,598  | 90,754,926  | 2 | 2 | 4 | 0 |
| Case 56 | 14 | 90,754,937  | 90,788,934  | 2 | 1 | 3 | 0 |
| Case 56 | 14 | 90,791,501  | 91,557,911  | 2 | 2 | 4 | 0 |
| Case 56 | 14 | 91,563,816  | 91,874,659  | 2 | 1 | 3 | 0 |
| Case 56 | 14 | 91,874,956  | 92,491,749  | 2 | 2 | 4 | 0 |
| Case 56 | 14 | 92,493,436  | 92,588,192  | 2 | 1 | 3 | 0 |
| Case 56 | 14 | 92,592,758  | 93,649,713  | 2 | 2 | 4 | 0 |
| Case 56 | 14 | 93,649,793  | 94,088,889  | 2 | 1 | 3 | 0 |
| Case 56 | 14 | 94,089,088  | 94,402,293  | 2 | 2 | 4 | 0 |
| Case 56 | 14 | 94,404,062  | 94,557,404  | 2 | 1 | 3 | 0 |
| Case 56 | 14 | 94,559,984  | 94,844,866  | 2 | 2 | 4 | 0 |
| Case 56 | 14 | 94,844,884  | 94,862,830  | 2 | 1 | 3 | 0 |
| Case 56 | 14 | 94,864,193  | 95,662,391  | 2 | 2 | 4 | 0 |
| Case 56 | 14 | 95,662,845  | 95,786,084  | 2 | 1 | 3 | 0 |
| Case 56 | 14 | 95,790,047  | 95,905,972  | 2 | 2 | 4 | 0 |
| Case 56 | 14 | 95,906,036  | 95,921,869  | 2 | 1 | 3 | 0 |
| Case 56 | 14 | 95,921,904  | 97,150,802  | 2 | 2 | 4 | 0 |
| Case 56 | 14 | 97,153,198  | 97,365,090  | 2 | 1 | 3 | 0 |
| Case 56 | 14 | 97,371,939  | 99,470,256  | 2 | 2 | 4 | 0 |
| Case 56 | 14 | 99,470,354  | 101,351,011 | 2 | 1 | 3 | 0 |
| Case 56 | 14 | 101,356,010 | 102,300,526 | 2 | 2 | 4 | 0 |
| Case 56 | 14 | 102,302,907 | 102,963,966 | 2 | 1 | 3 | 0 |
| Case 56 | 14 | 102,964,008 | 103,394,830 | 2 | 2 | 4 | 0 |
| Case 56 | 14 | 103,396,004 | 103,601,652 | 2 | 1 | 3 | 0 |
| Case 56 | 14 | 103,602,278 | 103,847,274 | 2 | 2 | 4 | 0 |
| Case 56 | 14 | 103,851,272 | 104,220,547 | 2 | 1 | 3 | 0 |
| Case 56 | 14 | 104,222,892 | 104,470,602 | 2 | 2 | 4 | 0 |
| Case 56 | 14 | 104,471,719 | 104,646,326 | 2 | 1 | 3 | 0 |
| Case 56 | 14 | 104,646,717 | 105,037,425 | 2 | 2 | 4 | 0 |
| Case 56 | 14 | 105,040,988 | 105,644,421 | 2 | 1 | 3 | 0 |
| Case 56 | 14 | 105,646,179 | 105,746,797 | 2 | 2 | 4 | 0 |
| Case 56 | 14 | 105,751,271 | 106,020,366 | 2 | 1 | 3 | 0 |
| Case 56 | 14 | 106,047,905 | 106,137,467 | 1 | 0 | 1 | 0 |
| Case 56 | 14 | 106,175,202 | 107,287,663 | 2 | 1 | 3 | 0 |
| Case 56 | 15 | 20,034,919  | 66,813,446  | 1 | 1 | 2 | 0 |
| Case 56 | 15 | 66,813,452  | 66,909,669  | 2 | 1 | 3 | 0 |
| Case 56 | 15 | 66,921,642  | 66,921,642  | 3 | 1 | 4 | 0 |
| Case 56 | 15 | 66,924,801  | 88,285,061  | 1 | 1 | 2 | 0 |
| Case 56 | 15 | 88,290,509  | 102,461,162 | 2 | 1 | 3 | 0 |
| Case 56 | 16 | 88,165      | 775,861     | 3 | 0 | 3 | 1 |
| Case 56 | 16 | 775,878     | 843,183     | 2 | 0 | 2 | 1 |
| Case 56 | 16 | 843,199     | 35,285,582  | 3 | 0 | 3 | 1 |
| Case 56 | 16 | 46,450,037  | 67,206,872  | 3 | 0 | 3 | 1 |

|         |    |            |            |   |   |   |   |
|---------|----|------------|------------|---|---|---|---|
| Case 56 | 16 | 67,207,933 | 67,223,003 | 2 | 0 | 2 | 1 |
| Case 56 | 16 | 67,223,042 | 78,284,812 | 3 | 0 | 3 | 1 |
| Case 56 | 16 | 78,291,853 | 78,344,118 | 2 | 0 | 2 | 1 |
| Case 56 | 16 | 78,345,435 | 78,581,206 | 3 | 0 | 3 | 1 |
| Case 56 | 16 | 78,584,616 | 78,706,825 | 2 | 0 | 2 | 1 |
| Case 56 | 16 | 78,711,205 | 78,787,891 | 3 | 0 | 3 | 1 |
| Case 56 | 16 | 78,789,322 | 78,899,407 | 2 | 0 | 2 | 1 |
| Case 56 | 16 | 78,900,527 | 90,274,695 | 3 | 0 | 3 | 1 |
| Case 56 | 17 | 11,885     | 22,242,355 | 2 | 0 | 2 | 1 |
| Case 56 | 17 | 25,268,142 | 27,076,072 | 2 | 0 | 2 | 1 |
| Case 56 | 17 | 27,076,453 | 27,286,851 | 7 | 0 | 7 | 1 |
| Case 56 | 17 | 27,290,989 | 27,438,782 | 2 | 0 | 2 | 1 |
| Case 56 | 17 | 27,442,042 | 27,911,557 | 7 | 0 | 7 | 1 |
| Case 56 | 17 | 27,917,771 | 31,355,299 | 2 | 0 | 2 | 1 |
| Case 56 | 17 | 31,355,376 | 31,458,970 | 3 | 0 | 3 | 1 |
| Case 56 | 17 | 31,463,409 | 34,436,708 | 2 | 0 | 2 | 1 |
| Case 56 | 17 | 34,443,811 | 34,461,869 | 3 | 2 | 5 | 0 |
| Case 56 | 17 | 34,462,907 | 34,597,521 | 5 | 1 | 6 | 0 |
| Case 56 | 17 | 34,815,551 | 35,263,956 | 2 | 0 | 2 | 1 |
| Case 56 | 17 | 35,272,108 | 35,378,312 | 7 | 0 | 7 | 1 |
| Case 56 | 17 | 35,388,558 | 35,736,240 | 2 | 0 | 2 | 1 |
| Case 56 | 17 | 35,740,855 | 36,129,442 | 7 | 0 | 7 | 1 |
| Case 56 | 17 | 36,131,437 | 36,605,490 | 2 | 0 | 2 | 1 |
| Case 56 | 17 | 36,612,948 | 36,777,379 | 7 | 0 | 7 | 1 |
| Case 56 | 17 | 36,798,187 | 37,668,488 | 2 | 0 | 2 | 1 |
| Case 56 | 17 | 37,676,209 | 37,985,732 | 7 | 0 | 7 | 1 |
| Case 56 | 17 | 38,010,815 | 66,659,235 | 2 | 0 | 2 | 1 |
| Case 56 | 17 | 66,659,442 | 66,748,998 | 3 | 0 | 3 | 1 |
| Case 56 | 17 | 66,751,902 | 81,060,040 | 2 | 0 | 2 | 1 |
| Case 56 | 18 | 87,505     | 2,925,284  | 2 | 0 | 2 | 1 |
| Case 56 | 18 | 2,925,293  | 3,256,112  | 3 | 0 | 3 | 1 |
| Case 56 | 18 | 3,260,924  | 6,649,599  | 2 | 0 | 2 | 1 |
| Case 56 | 18 | 6,649,965  | 6,741,913  | 3 | 0 | 3 | 1 |
| Case 56 | 18 | 6,752,265  | 15,375,878 | 2 | 0 | 2 | 1 |
| Case 56 | 18 | 18,520,354 | 18,539,806 | 2 | 0 | 2 | 1 |
| Case 56 | 18 | 18,546,896 | 19,814,796 | 2 | 1 | 3 | 0 |
| Case 56 | 18 | 19,823,874 | 20,066,155 | 7 | 0 | 7 | 1 |
| Case 56 | 18 | 20,072,571 | 20,072,571 | 1 | 1 | 2 | 0 |
| Case 56 | 18 | 20,073,756 | 20,777,414 | 2 | 1 | 3 | 0 |
| Case 56 | 18 | 20,782,046 | 22,419,593 | 2 | 0 | 2 | 1 |
| Case 56 | 18 | 22,421,429 | 22,434,319 | 7 | 0 | 7 | 1 |
| Case 56 | 18 | 22,437,586 | 78,015,180 | 2 | 0 | 2 | 1 |
| Case 56 | 19 | 260,912    | 6,534,985  | 2 | 1 | 3 | 0 |
| Case 56 | 19 | 6,535,064  | 6,664,054  | 2 | 2 | 4 | 0 |
| Case 56 | 19 | 6,665,020  | 13,431,565 | 2 | 1 | 3 | 0 |
| Case 56 | 19 | 13,433,127 | 13,803,170 | 2 | 2 | 4 | 0 |
| Case 56 | 19 | 13,811,279 | 14,991,887 | 2 | 1 | 3 | 0 |
| Case 56 | 19 | 14,991,963 | 15,163,018 | 2 | 2 | 4 | 0 |
| Case 56 | 19 | 15,163,075 | 15,683,159 | 2 | 1 | 3 | 0 |
| Case 56 | 19 | 15,683,645 | 15,752,023 | 2 | 2 | 4 | 0 |
| Case 56 | 19 | 15,752,137 | 15,809,098 | 2 | 1 | 3 | 0 |
| Case 56 | 19 | 15,809,248 | 16,171,361 | 2 | 2 | 4 | 0 |
| Case 56 | 19 | 16,172,739 | 20,003,341 | 2 | 1 | 3 | 0 |
| Case 56 | 19 | 20,003,485 | 22,811,667 | 2 | 2 | 4 | 0 |
| Case 56 | 19 | 22,816,867 | 23,656,420 | 2 | 1 | 3 | 0 |
| Case 56 | 19 | 23,661,800 | 24,378,000 | 2 | 2 | 4 | 0 |
| Case 56 | 19 | 24,379,583 | 24,629,285 | 2 | 1 | 3 | 0 |
| Case 56 | 19 | 27,732,159 | 27,763,440 | 2 | 1 | 3 | 0 |
| Case 56 | 19 | 27,801,814 | 41,350,895 | 3 | 1 | 4 | 0 |
| Case 56 | 19 | 41,351,935 | 41,985,587 | 2 | 1 | 3 | 0 |
| Case 56 | 19 | 41,985,802 | 42,049,821 | 3 | 1 | 4 | 0 |



|         |    |            |            |   |   |   |   |
|---------|----|------------|------------|---|---|---|---|
| Case 56 | 19 | 42,053,936 | 43,576,030 | 2 | 1 | 3 | 0 |
| Case 56 | 19 | 43,580,748 | 43,590,229 | 2 | 0 | 2 | 1 |
| Case 56 | 19 | 43,603,371 | 43,772,026 | 0 | 0 | 0 | 0 |
| Case 56 | 19 | 43,772,049 | 43,772,302 | 2 | 0 | 2 | 1 |
| Case 56 | 19 | 43,802,290 | 43,805,328 | 2 | 1 | 3 | 0 |
| Case 56 | 19 | 43,805,731 | 43,964,028 | 3 | 1 | 4 | 0 |
| Case 56 | 19 | 43,965,664 | 44,419,263 | 2 | 1 | 3 | 0 |
| Case 56 | 19 | 44,429,120 | 44,501,481 | 3 | 1 | 4 | 0 |
| Case 56 | 19 | 44,506,249 | 44,891,838 | 2 | 1 | 3 | 0 |
| Case 56 | 19 | 44,892,034 | 45,016,116 | 3 | 1 | 4 | 0 |
| Case 56 | 19 | 45,016,506 | 45,028,231 | 2 | 1 | 3 | 0 |
| Case 56 | 19 | 45,028,250 | 45,092,366 | 3 | 1 | 4 | 0 |
| Case 56 | 19 | 45,092,942 | 47,947,982 | 2 | 1 | 3 | 0 |
| Case 56 | 19 | 47,948,228 | 48,289,303 | 3 | 1 | 4 | 0 |
| Case 56 | 19 | 48,292,018 | 51,297,825 | 2 | 1 | 3 | 0 |
| Case 56 | 19 | 51,297,826 | 51,379,893 | 3 | 1 | 4 | 0 |
| Case 56 | 19 | 51,379,895 | 52,627,207 | 2 | 1 | 3 | 0 |
| Case 56 | 19 | 52,627,349 | 52,847,713 | 3 | 1 | 4 | 0 |
| Case 56 | 19 | 52,847,988 | 52,928,039 | 2 | 1 | 3 | 0 |
| Case 56 | 19 | 52,929,255 | 53,169,992 | 3 | 1 | 4 | 0 |
| Case 56 | 19 | 53,177,758 | 53,741,667 | 2 | 1 | 3 | 0 |
| Case 56 | 19 | 53,741,744 | 53,877,534 | 3 | 1 | 4 | 0 |
| Case 56 | 19 | 53,877,704 | 56,379,088 | 2 | 1 | 3 | 0 |
| Case 56 | 19 | 56,379,178 | 56,463,023 | 3 | 1 | 4 | 0 |
| Case 56 | 19 | 56,463,913 | 56,743,681 | 2 | 1 | 3 | 0 |
| Case 56 | 19 | 56,745,782 | 56,901,457 | 3 | 1 | 4 | 0 |
| Case 56 | 19 | 56,901,743 | 57,139,555 | 2 | 1 | 3 | 0 |
| Case 56 | 19 | 57,145,434 | 57,286,130 | 3 | 1 | 4 | 0 |
| Case 56 | 19 | 57,286,222 | 57,359,432 | 2 | 1 | 3 | 0 |
| Case 56 | 19 | 57,372,498 | 57,640,185 | 3 | 1 | 4 | 0 |
| Case 56 | 19 | 57,640,333 | 57,956,828 | 2 | 1 | 3 | 0 |
| Case 56 | 19 | 57,961,612 | 58,005,406 | 3 | 1 | 4 | 0 |
| Case 56 | 19 | 58,010,642 | 58,353,003 | 2 | 1 | 3 | 0 |
| Case 56 | 19 | 58,354,265 | 58,436,020 | 3 | 1 | 4 | 0 |
| Case 56 | 19 | 58,436,041 | 58,774,064 | 2 | 1 | 3 | 0 |
| Case 56 | 19 | 58,774,071 | 58,799,781 | 3 | 1 | 4 | 0 |
| Case 56 | 19 | 58,805,464 | 59,097,160 | 2 | 1 | 3 | 0 |
| Case 56 | 20 | 63,244     | 351,944    | 2 | 2 | 4 | 0 |
| Case 56 | 20 | 352,717    | 426,433    | 2 | 1 | 3 | 0 |
| Case 56 | 20 | 428,553    | 720,604    | 2 | 2 | 4 | 0 |
| Case 56 | 20 | 724,578    | 757,498    | 2 | 1 | 3 | 0 |
| Case 56 | 20 | 759,315    | 1,344,974  | 2 | 2 | 4 | 0 |
| Case 56 | 20 | 1,346,236  | 1,467,917  | 2 | 1 | 3 | 0 |
| Case 56 | 20 | 1,468,516  | 1,539,444  | 2 | 2 | 4 | 0 |
| Case 56 | 20 | 1,543,409  | 2,327,417  | 2 | 1 | 3 | 0 |
| Case 56 | 20 | 2,327,695  | 2,367,161  | 2 | 2 | 4 | 0 |
| Case 56 | 20 | 2,371,782  | 2,474,429  | 2 | 1 | 3 | 0 |
| Case 56 | 20 | 2,474,529  | 2,760,705  | 2 | 2 | 4 | 0 |
| Case 56 | 20 | 2,761,098  | 4,081,175  | 2 | 1 | 3 | 0 |
| Case 56 | 20 | 4,087,050  | 4,596,392  | 2 | 2 | 4 | 0 |
| Case 56 | 20 | 4,597,326  | 4,701,211  | 2 | 1 | 3 | 0 |
| Case 56 | 20 | 4,702,964  | 4,762,869  | 2 | 2 | 4 | 0 |
| Case 56 | 20 | 4,763,108  | 5,554,614  | 2 | 1 | 3 | 0 |
| Case 56 | 20 | 5,560,671  | 5,843,812  | 2 | 2 | 4 | 0 |
| Case 56 | 20 | 5,843,912  | 5,904,558  | 2 | 1 | 3 | 0 |
| Case 56 | 20 | 5,905,779  | 10,538,389 | 2 | 2 | 4 | 0 |
| Case 56 | 20 | 10,549,503 | 10,656,087 | 2 | 1 | 3 | 0 |
| Case 56 | 20 | 10,669,188 | 14,550,380 | 2 | 2 | 4 | 0 |
| Case 56 | 20 | 14,553,745 | 14,705,888 | 2 | 0 | 2 | 1 |
| Case 56 | 20 | 14,713,890 | 14,827,620 | 0 | 0 | 0 | 0 |
| Case 56 | 20 | 14,833,762 | 14,927,862 | 1 | 0 | 1 | 0 |

|         |    |            |            |   |   |   |   |
|---------|----|------------|------------|---|---|---|---|
| Case 56 | 20 | 14,931,186 | 15,061,394 | 2 | 0 | 2 | 1 |
| Case 56 | 20 | 15,063,214 | 15,171,838 | 0 | 0 | 0 | 0 |
| Case 56 | 20 | 15,179,023 | 15,454,466 | 2 | 0 | 2 | 1 |
| Case 56 | 20 | 15,455,573 | 16,317,350 | 2 | 2 | 4 | 0 |
| Case 56 | 20 | 16,317,636 | 16,506,769 | 2 | 1 | 3 | 0 |
| Case 56 | 20 | 16,507,826 | 18,142,924 | 2 | 2 | 4 | 0 |
| Case 56 | 20 | 18,143,045 | 18,192,251 | 2 | 1 | 3 | 0 |
| Case 56 | 20 | 18,196,732 | 19,920,183 | 2 | 2 | 4 | 0 |
| Case 56 | 20 | 19,921,187 | 20,079,447 | 2 | 1 | 3 | 0 |
| Case 56 | 20 | 20,079,500 | 20,180,422 | 2 | 2 | 4 | 0 |
| Case 56 | 20 | 20,182,561 | 20,804,684 | 2 | 1 | 3 | 0 |
| Case 56 | 20 | 20,805,089 | 23,015,092 | 2 | 2 | 4 | 0 |
| Case 56 | 20 | 23,016,706 | 23,077,649 | 2 | 1 | 3 | 0 |
| Case 56 | 20 | 23,080,100 | 23,231,946 | 2 | 2 | 4 | 0 |
| Case 56 | 20 | 23,237,371 | 23,548,948 | 2 | 1 | 3 | 0 |
| Case 56 | 20 | 23,548,992 | 23,778,522 | 2 | 2 | 4 | 0 |
| Case 56 | 20 | 23,779,830 | 24,023,073 | 2 | 1 | 3 | 0 |
| Case 56 | 20 | 24,023,945 | 24,666,100 | 2 | 2 | 4 | 0 |
| Case 56 | 20 | 24,667,400 | 26,293,985 | 2 | 1 | 3 | 0 |
| Case 56 | 20 | 29,425,357 | 32,453,576 | 2 | 1 | 3 | 0 |
| Case 56 | 20 | 32,454,413 | 33,095,891 | 2 | 2 | 4 | 0 |
| Case 56 | 20 | 33,100,250 | 34,288,536 | 2 | 1 | 3 | 0 |
| Case 56 | 20 | 34,288,854 | 35,060,236 | 2 | 2 | 4 | 0 |
| Case 56 | 20 | 35,060,338 | 36,174,062 | 2 | 1 | 3 | 0 |
| Case 56 | 20 | 36,174,175 | 36,842,883 | 2 | 2 | 4 | 0 |
| Case 56 | 20 | 36,845,698 | 37,881,482 | 2 | 1 | 3 | 0 |
| Case 56 | 20 | 37,884,312 | 39,775,494 | 2 | 2 | 4 | 0 |
| Case 56 | 20 | 39,782,899 | 40,076,438 | 2 | 1 | 3 | 0 |
| Case 56 | 20 | 40,078,085 | 42,237,067 | 2 | 2 | 4 | 0 |
| Case 56 | 20 | 42,241,866 | 42,375,432 | 2 | 1 | 3 | 0 |
| Case 56 | 20 | 42,383,192 | 42,874,509 | 2 | 2 | 4 | 0 |
| Case 56 | 20 | 42,885,803 | 43,020,103 | 2 | 1 | 3 | 0 |
| Case 56 | 20 | 43,022,873 | 43,135,538 | 2 | 2 | 4 | 0 |
| Case 56 | 20 | 43,135,556 | 43,425,523 | 2 | 1 | 3 | 0 |
| Case 56 | 20 | 43,430,490 | 43,721,493 | 2 | 2 | 4 | 0 |
| Case 56 | 20 | 43,723,569 | 44,695,817 | 2 | 1 | 3 | 0 |
| Case 56 | 20 | 44,697,221 | 45,121,949 | 2 | 2 | 4 | 0 |
| Case 56 | 20 | 45,125,954 | 45,181,468 | 2 | 1 | 3 | 0 |
| Case 56 | 20 | 45,182,197 | 45,224,837 | 2 | 2 | 4 | 0 |
| Case 56 | 20 | 45,224,933 | 45,354,349 | 2 | 1 | 3 | 0 |
| Case 56 | 20 | 45,354,351 | 45,770,401 | 2 | 2 | 4 | 0 |
| Case 56 | 20 | 45,771,231 | 46,313,221 | 2 | 1 | 3 | 0 |
| Case 56 | 20 | 46,313,974 | 46,794,656 | 2 | 2 | 4 | 0 |
| Case 56 | 20 | 46,795,103 | 46,967,667 | 2 | 1 | 3 | 0 |
| Case 56 | 20 | 46,968,735 | 47,241,358 | 2 | 2 | 4 | 0 |
| Case 56 | 20 | 47,241,618 | 47,274,733 | 2 | 1 | 3 | 0 |
| Case 56 | 20 | 47,276,381 | 47,806,334 | 2 | 2 | 4 | 0 |
| Case 56 | 20 | 47,817,815 | 47,953,769 | 2 | 1 | 3 | 0 |
| Case 56 | 20 | 47,955,131 | 48,085,832 | 2 | 2 | 4 | 0 |
| Case 56 | 20 | 48,087,871 | 48,166,725 | 2 | 1 | 3 | 0 |
| Case 56 | 20 | 48,167,203 | 48,221,933 | 2 | 2 | 4 | 0 |
| Case 56 | 20 | 48,231,141 | 48,325,554 | 2 | 1 | 3 | 0 |
| Case 56 | 20 | 48,330,197 | 56,179,819 | 2 | 2 | 4 | 0 |
| Case 56 | 20 | 56,181,949 | 56,252,260 | 2 | 1 | 3 | 0 |
| Case 56 | 20 | 56,252,956 | 60,594,886 | 2 | 2 | 4 | 0 |
| Case 56 | 20 | 60,598,060 | 60,909,518 | 2 | 1 | 3 | 0 |
| Case 56 | 20 | 60,910,124 | 61,382,667 | 2 | 2 | 4 | 0 |
| Case 56 | 20 | 61,384,043 | 61,543,320 | 2 | 1 | 3 | 0 |
| Case 56 | 20 | 61,544,714 | 62,092,342 | 2 | 2 | 4 | 0 |
| Case 56 | 20 | 62,099,296 | 62,194,360 | 2 | 1 | 3 | 0 |
| Case 56 | 20 | 62,194,374 | 62,196,987 | 2 | 2 | 4 | 0 |

|         |    |            |            |   |   |   |   |
|---------|----|------------|------------|---|---|---|---|
| Case 56 | 20 | 62,197,089 | 62,948,788 | 2 | 1 | 3 | 0 |
| Case 56 | 21 | 10,827,533 | 10,971,337 | 2 | 1 | 3 | 0 |
| Case 56 | 21 | 14,368,320 | 15,639,282 | 2 | 1 | 3 | 0 |
| Case 56 | 21 | 15,641,852 | 16,116,012 | 2 | 2 | 4 | 0 |
| Case 56 | 21 | 16,116,306 | 16,339,797 | 2 | 1 | 3 | 0 |
| Case 56 | 21 | 16,339,852 | 16,871,764 | 2 | 2 | 4 | 0 |
| Case 56 | 21 | 16,874,691 | 17,744,507 | 2 | 1 | 3 | 0 |
| Case 56 | 21 | 17,745,383 | 19,640,558 | 2 | 2 | 4 | 0 |
| Case 56 | 21 | 19,642,285 | 19,844,745 | 2 | 1 | 3 | 0 |
| Case 56 | 21 | 19,845,142 | 27,037,132 | 2 | 2 | 4 | 0 |
| Case 56 | 21 | 27,052,625 | 27,194,869 | 2 | 1 | 3 | 0 |
| Case 56 | 21 | 27,195,389 | 29,512,586 | 2 | 2 | 4 | 0 |
| Case 56 | 21 | 29,514,609 | 30,888,935 | 2 | 1 | 3 | 0 |
| Case 56 | 21 | 30,890,875 | 31,690,846 | 2 | 2 | 4 | 0 |
| Case 56 | 21 | 31,691,571 | 31,744,555 | 2 | 1 | 3 | 0 |
| Case 56 | 21 | 31,753,700 | 32,489,557 | 2 | 2 | 4 | 0 |
| Case 56 | 21 | 32,490,292 | 33,388,230 | 2 | 1 | 3 | 0 |
| Case 56 | 21 | 33,392,803 | 33,583,831 | 2 | 2 | 4 | 0 |
| Case 56 | 21 | 33,584,340 | 34,308,197 | 2 | 1 | 3 | 0 |
| Case 56 | 21 | 34,309,113 | 34,635,801 | 2 | 2 | 4 | 0 |
| Case 56 | 21 | 34,640,722 | 35,571,906 | 2 | 1 | 3 | 0 |
| Case 56 | 21 | 35,572,727 | 37,128,336 | 2 | 2 | 4 | 0 |
| Case 56 | 21 | 37,131,690 | 37,619,868 | 2 | 1 | 3 | 0 |
| Case 56 | 21 | 37,619,914 | 38,184,059 | 2 | 2 | 4 | 0 |
| Case 56 | 21 | 38,185,881 | 38,401,539 | 2 | 1 | 3 | 0 |
| Case 56 | 21 | 38,409,876 | 40,455,048 | 2 | 2 | 4 | 0 |
| Case 56 | 21 | 40,465,178 | 40,795,346 | 2 | 1 | 3 | 0 |
| Case 56 | 21 | 40,795,408 | 42,426,742 | 2 | 2 | 4 | 0 |
| Case 56 | 21 | 42,428,264 | 42,909,862 | 2 | 1 | 3 | 0 |
| Case 56 | 21 | 42,912,973 | 43,160,015 | 2 | 2 | 4 | 0 |
| Case 56 | 21 | 43,160,438 | 43,319,984 | 2 | 1 | 3 | 0 |
| Case 56 | 21 | 43,321,283 | 43,708,059 | 2 | 2 | 4 | 0 |
| Case 56 | 21 | 43,708,097 | 44,092,814 | 2 | 1 | 3 | 0 |
| Case 56 | 21 | 44,096,673 | 44,271,989 | 2 | 2 | 4 | 0 |
| Case 56 | 21 | 44,272,374 | 46,326,929 | 2 | 1 | 3 | 0 |
| Case 56 | 21 | 46,327,835 | 46,670,457 | 2 | 2 | 4 | 0 |
| Case 56 | 21 | 46,670,812 | 48,100,155 | 2 | 1 | 3 | 0 |
| Case 56 | 22 | 16,114,244 | 17,177,906 | 2 | 1 | 3 | 0 |
| Case 56 | 22 | 17,178,230 | 17,932,686 | 2 | 2 | 4 | 0 |
| Case 56 | 22 | 17,937,630 | 19,529,130 | 2 | 1 | 3 | 0 |
| Case 56 | 22 | 19,534,856 | 19,737,621 | 2 | 2 | 4 | 0 |
| Case 56 | 22 | 19,738,355 | 20,891,545 | 2 | 1 | 3 | 0 |
| Case 56 | 22 | 20,896,926 | 21,135,346 | 2 | 2 | 4 | 0 |
| Case 56 | 22 | 21,138,369 | 22,453,239 | 2 | 1 | 3 | 0 |
| Case 56 | 22 | 22,454,680 | 22,457,546 | 1 | 0 | 1 | 0 |
| Case 56 | 22 | 22,464,245 | 22,554,577 | 2 | 2 | 4 | 0 |
| Case 56 | 22 | 22,555,078 | 23,803,722 | 2 | 1 | 3 | 0 |
| Case 56 | 22 | 23,813,258 | 23,912,723 | 2 | 2 | 4 | 0 |
| Case 56 | 22 | 23,915,670 | 36,681,272 | 2 | 1 | 3 | 0 |
| Case 56 | 22 | 36,681,327 | 36,755,498 | 2 | 0 | 2 | 1 |
| Case 56 | 22 | 36,758,258 | 42,301,477 | 2 | 1 | 3 | 0 |
| Case 56 | 22 | 42,302,464 | 42,454,950 | 2 | 2 | 4 | 0 |
| Case 56 | 22 | 42,456,140 | 43,032,843 | 2 | 1 | 3 | 0 |
| Case 56 | 22 | 43,041,545 | 43,193,929 | 2 | 2 | 4 | 0 |
| Case 56 | 22 | 43,195,045 | 44,924,370 | 2 | 1 | 3 | 0 |
| Case 56 | 22 | 44,924,394 | 45,121,864 | 2 | 2 | 4 | 0 |
| Case 56 | 22 | 45,121,914 | 45,258,414 | 2 | 1 | 3 | 0 |
| Case 56 | 22 | 45,258,422 | 45,337,329 | 2 | 2 | 4 | 0 |
| Case 56 | 22 | 45,338,213 | 45,810,273 | 2 | 1 | 3 | 0 |
| Case 56 | 22 | 45,811,362 | 45,970,029 | 2 | 2 | 4 | 0 |
| Case 56 | 22 | 45,970,420 | 47,189,678 | 2 | 1 | 3 | 0 |

|         |    |            |            |   |   |   |   |
|---------|----|------------|------------|---|---|---|---|
| Case 56 | 22 | 47,191,699 | 47,706,502 | 2 | 2 | 4 | 0 |
| Case 56 | 22 | 47,711,836 | 48,248,720 | 2 | 1 | 3 | 0 |
| Case 56 | 22 | 48,250,736 | 49,198,744 | 2 | 2 | 4 | 0 |
| Case 56 | 22 | 49,199,553 | 49,363,849 | 2 | 1 | 3 | 0 |
| Case 56 | 22 | 49,364,119 | 49,419,836 | 2 | 2 | 4 | 0 |
| Case 56 | 22 | 49,420,129 | 49,541,533 | 2 | 1 | 3 | 0 |
| Case 56 | 22 | 49,542,106 | 49,749,712 | 2 | 2 | 4 | 0 |
| Case 56 | 22 | 49,750,406 | 49,795,510 | 2 | 1 | 3 | 0 |
| Case 56 | 22 | 49,796,800 | 49,878,293 | 2 | 2 | 4 | 0 |
| Case 56 | 22 | 49,887,506 | 51,195,728 | 2 | 1 | 3 | 0 |
| Case 59 | 1  | 82,154     | 1,763,774  | 1 | 1 | 2 | 0 |
| Case 59 | 1  | 1,776,269  | 1,846,765  | 2 | 1 | 3 | 0 |
| Case 59 | 1  | 1,847,531  | 2,000,592  | 1 | 1 | 2 | 0 |
| Case 59 | 1  | 2,004,098  | 2,051,513  | 2 | 1 | 3 | 0 |
| Case 59 | 1  | 2,056,735  | 2,185,886  | 1 | 1 | 2 | 0 |
| Case 59 | 1  | 2,189,580  | 2,221,222  | 2 | 1 | 3 | 0 |
| Case 59 | 1  | 2,221,534  | 2,305,965  | 1 | 1 | 2 | 0 |
| Case 59 | 1  | 2,306,152  | 2,309,082  | 2 | 1 | 3 | 0 |
| Case 59 | 1  | 2,310,193  | 2,326,009  | 1 | 1 | 2 | 0 |
| Case 59 | 1  | 2,327,075  | 2,336,210  | 2 | 1 | 3 | 0 |
| Case 59 | 1  | 2,338,015  | 2,749,921  | 1 | 1 | 2 | 0 |
| Case 59 | 1  | 2,750,437  | 2,876,525  | 2 | 1 | 3 | 0 |
| Case 59 | 1  | 2,878,366  | 3,000,465  | 1 | 1 | 2 | 0 |
| Case 59 | 1  | 3,000,924  | 3,057,661  | 2 | 1 | 3 | 0 |
| Case 59 | 1  | 3,062,361  | 3,149,145  | 1 | 1 | 2 | 0 |
| Case 59 | 1  | 3,150,345  | 3,208,375  | 2 | 1 | 3 | 0 |
| Case 59 | 1  | 3,208,830  | 3,241,829  | 1 | 1 | 2 | 0 |
| Case 59 | 1  | 3,243,017  | 3,261,682  | 2 | 1 | 3 | 0 |
| Case 59 | 1  | 3,261,925  | 3,294,422  | 1 | 1 | 2 | 0 |
| Case 59 | 1  | 3,294,972  | 3,325,037  | 2 | 1 | 3 | 0 |
| Case 59 | 1  | 3,327,949  | 3,348,629  | 1 | 1 | 2 | 0 |
| Case 59 | 1  | 3,349,513  | 3,377,442  | 2 | 1 | 3 | 0 |
| Case 59 | 1  | 3,380,057  | 3,740,089  | 1 | 1 | 2 | 0 |
| Case 59 | 1  | 3,741,782  | 3,750,449  | 2 | 1 | 3 | 0 |
| Case 59 | 1  | 3,750,491  | 4,002,832  | 1 | 1 | 2 | 0 |
| Case 59 | 1  | 4,002,958  | 4,007,110  | 2 | 1 | 3 | 0 |
| Case 59 | 1  | 4,007,558  | 4,007,688  | 2 | 0 | 2 | 1 |
| Case 59 | 1  | 4,009,071  | 4,210,455  | 1 | 0 | 1 | 0 |
| Case 59 | 1  | 4,212,493  | 4,263,677  | 1 | 1 | 2 | 0 |
| Case 59 | 1  | 4,263,997  | 4,293,892  | 2 | 1 | 3 | 0 |
| Case 59 | 1  | 4,294,000  | 4,335,893  | 1 | 1 | 2 | 0 |
| Case 59 | 1  | 4,341,843  | 4,370,385  | 2 | 1 | 3 | 0 |
| Case 59 | 1  | 4,370,489  | 4,380,518  | 1 | 1 | 2 | 0 |
| Case 59 | 1  | 4,380,629  | 4,398,996  | 2 | 1 | 3 | 0 |
| Case 59 | 1  | 4,401,450  | 4,406,674  | 2 | 0 | 2 | 1 |
| Case 59 | 1  | 4,409,496  | 4,591,622  | 1 | 0 | 1 | 0 |
| Case 59 | 1  | 4,592,382  | 4,596,700  | 1 | 1 | 2 | 0 |
| Case 59 | 1  | 4,598,021  | 4,641,742  | 2 | 1 | 3 | 0 |
| Case 59 | 1  | 4,643,432  | 4,851,303  | 1 | 1 | 2 | 0 |
| Case 59 | 1  | 4,852,907  | 5,019,553  | 2 | 0 | 2 | 1 |
| Case 59 | 1  | 5,021,200  | 5,043,734  | 1 | 0 | 1 | 0 |
| Case 59 | 1  | 5,047,038  | 5,246,626  | 1 | 1 | 2 | 0 |
| Case 59 | 1  | 5,246,841  | 5,277,437  | 2 | 1 | 3 | 0 |
| Case 59 | 1  | 5,277,439  | 5,318,552  | 1 | 1 | 2 | 0 |
| Case 59 | 1  | 5,320,534  | 5,347,627  | 1 | 0 | 1 | 0 |
| Case 59 | 1  | 5,347,979  | 5,362,345  | 1 | 1 | 2 | 0 |
| Case 59 | 1  | 5,369,798  | 5,421,533  | 2 | 1 | 3 | 0 |
| Case 59 | 1  | 5,424,374  | 6,039,254  | 1 | 1 | 2 | 0 |
| Case 59 | 1  | 6,043,809  | 6,070,870  | 2 | 1 | 3 | 0 |
| Case 59 | 1  | 6,079,392  | 6,104,002  | 1 | 1 | 2 | 0 |
| Case 59 | 1  | 6,104,715  | 6,162,645  | 2 | 1 | 3 | 0 |

|         |   |             |             |   |   |   |   |
|---------|---|-------------|-------------|---|---|---|---|
| Case 59 | 1 | 6,165,279   | 74,560,603  | 1 | 1 | 2 | 0 |
| Case 59 | 1 | 74,561,386  | 74,649,321  | 2 | 1 | 3 | 0 |
| Case 59 | 1 | 74,654,182  | 76,331,320  | 1 | 1 | 2 | 0 |
| Case 59 | 1 | 76,342,180  | 76,382,664  | 2 | 1 | 3 | 0 |
| Case 59 | 1 | 76,383,297  | 91,730,806  | 1 | 1 | 2 | 0 |
| Case 59 | 1 | 91,739,270  | 91,866,635  | 2 | 1 | 3 | 0 |
| Case 59 | 1 | 91,872,374  | 92,704,761  | 1 | 1 | 2 | 0 |
| Case 59 | 1 | 92,707,504  | 92,733,663  | 2 | 1 | 3 | 0 |
| Case 59 | 1 | 92,735,301  | 93,646,433  | 1 | 1 | 2 | 0 |
| Case 59 | 1 | 93,651,547  | 93,730,427  | 2 | 1 | 3 | 0 |
| Case 59 | 1 | 93,741,025  | 115,437,986 | 1 | 1 | 2 | 0 |
| Case 59 | 1 | 115,453,062 | 115,537,933 | 2 | 1 | 3 | 0 |
| Case 59 | 1 | 115,542,887 | 121,346,616 | 1 | 1 | 2 | 0 |
| Case 59 | 1 | 142,649,718 | 145,747,065 | 1 | 1 | 2 | 0 |
| Case 59 | 1 | 145,747,463 | 146,516,199 | 2 | 1 | 3 | 0 |
| Case 59 | 1 | 146,517,465 | 146,612,482 | 1 | 1 | 2 | 0 |
| Case 59 | 1 | 146,625,065 | 146,982,763 | 2 | 1 | 3 | 0 |
| Case 59 | 1 | 146,982,884 | 147,022,697 | 1 | 1 | 2 | 0 |
| Case 59 | 1 | 147,023,894 | 147,082,026 | 2 | 1 | 3 | 0 |
| Case 59 | 1 | 147,083,744 | 147,245,324 | 1 | 1 | 2 | 0 |
| Case 59 | 1 | 147,246,793 | 147,355,294 | 2 | 1 | 3 | 0 |
| Case 59 | 1 | 147,357,928 | 149,955,163 | 1 | 1 | 2 | 0 |
| Case 59 | 1 | 149,968,717 | 150,199,062 | 2 | 1 | 3 | 0 |
| Case 59 | 1 | 150,199,123 | 150,608,894 | 1 | 1 | 2 | 0 |
| Case 59 | 1 | 150,615,094 | 150,900,260 | 2 | 1 | 3 | 0 |
| Case 59 | 1 | 150,900,342 | 151,038,135 | 1 | 1 | 2 | 0 |
| Case 59 | 1 | 151,039,609 | 151,104,598 | 2 | 1 | 3 | 0 |
| Case 59 | 1 | 151,105,169 | 151,168,286 | 1 | 1 | 2 | 0 |
| Case 59 | 1 | 151,173,113 | 151,288,172 | 2 | 1 | 3 | 0 |
| Case 59 | 1 | 151,288,698 | 151,340,762 | 1 | 1 | 2 | 0 |
| Case 59 | 1 | 151,341,417 | 151,477,193 | 2 | 1 | 3 | 0 |
| Case 59 | 1 | 151,488,782 | 151,546,855 | 1 | 1 | 2 | 0 |
| Case 59 | 1 | 151,547,253 | 151,734,961 | 2 | 1 | 3 | 0 |
| Case 59 | 1 | 151,735,493 | 151,809,066 | 1 | 1 | 2 | 0 |
| Case 59 | 1 | 151,814,405 | 152,056,368 | 2 | 1 | 3 | 0 |
| Case 59 | 1 | 152,057,472 | 152,085,900 | 1 | 1 | 2 | 0 |
| Case 59 | 1 | 152,086,420 | 152,128,139 | 2 | 1 | 3 | 0 |
| Case 59 | 1 | 152,128,178 | 152,193,741 | 1 | 1 | 2 | 0 |
| Case 59 | 1 | 152,193,851 | 152,275,177 | 2 | 1 | 3 | 0 |
| Case 59 | 1 | 152,275,273 | 152,286,967 | 1 | 1 | 2 | 0 |
| Case 59 | 1 | 152,287,078 | 152,321,344 | 2 | 1 | 3 | 0 |
| Case 59 | 1 | 152,322,042 | 152,958,133 | 1 | 1 | 2 | 0 |
| Case 59 | 1 | 152,958,166 | 153,265,527 | 2 | 1 | 3 | 0 |
| Case 59 | 1 | 153,270,461 | 153,320,401 | 1 | 1 | 2 | 0 |
| Case 59 | 1 | 153,322,574 | 153,329,071 | 2 | 1 | 3 | 0 |
| Case 59 | 1 | 153,330,787 | 153,964,542 | 1 | 1 | 2 | 0 |
| Case 59 | 1 | 153,965,322 | 154,127,427 | 2 | 1 | 3 | 0 |
| Case 59 | 1 | 154,127,482 | 154,551,032 | 1 | 1 | 2 | 0 |
| Case 59 | 1 | 154,554,357 | 154,811,127 | 2 | 1 | 3 | 0 |
| Case 59 | 1 | 154,811,420 | 155,309,128 | 1 | 1 | 2 | 0 |
| Case 59 | 1 | 155,311,840 | 155,899,631 | 2 | 1 | 3 | 0 |
| Case 59 | 1 | 155,904,392 | 156,255,396 | 1 | 1 | 2 | 0 |
| Case 59 | 1 | 156,255,448 | 156,338,968 | 2 | 1 | 3 | 0 |
| Case 59 | 1 | 156,339,047 | 156,640,667 | 1 | 1 | 2 | 0 |
| Case 59 | 1 | 156,640,678 | 156,706,501 | 2 | 1 | 3 | 0 |
| Case 59 | 1 | 156,707,553 | 156,933,003 | 1 | 1 | 2 | 0 |
| Case 59 | 1 | 156,933,019 | 157,484,453 | 2 | 1 | 3 | 0 |
| Case 59 | 1 | 157,484,575 | 157,512,819 | 1 | 1 | 2 | 0 |
| Case 59 | 1 | 157,513,569 | 157,545,231 | 2 | 1 | 3 | 0 |
| Case 59 | 1 | 157,545,384 | 157,826,691 | 1 | 1 | 2 | 0 |
| Case 59 | 1 | 157,830,947 | 157,977,753 | 2 | 1 | 3 | 0 |

|         |   |             |             |   |   |   |   |
|---------|---|-------------|-------------|---|---|---|---|
| Case 59 | 1 | 157,982,579 | 158,726,746 | 1 | 1 | 2 | 0 |
| Case 59 | 1 | 158,729,346 | 158,754,813 | 2 | 1 | 3 | 0 |
| Case 59 | 1 | 158,756,275 | 158,884,519 | 1 | 1 | 2 | 0 |
| Case 59 | 1 | 158,887,208 | 159,002,410 | 2 | 1 | 3 | 0 |
| Case 59 | 1 | 159,005,035 | 159,284,386 | 1 | 1 | 2 | 0 |
| Case 59 | 1 | 159,292,850 | 159,682,233 | 2 | 1 | 3 | 0 |
| Case 59 | 1 | 159,682,528 | 159,685,136 | 1 | 1 | 2 | 0 |
| Case 59 | 1 | 159,686,483 | 159,732,811 | 2 | 1 | 3 | 0 |
| Case 59 | 1 | 159,736,139 | 160,191,429 | 1 | 1 | 2 | 0 |
| Case 59 | 1 | 160,192,473 | 160,249,363 | 2 | 1 | 3 | 0 |
| Case 59 | 1 | 160,249,384 | 160,395,047 | 1 | 1 | 2 | 0 |
| Case 59 | 1 | 160,398,019 | 160,513,183 | 2 | 1 | 3 | 0 |
| Case 59 | 1 | 160,516,145 | 160,535,331 | 1 | 1 | 2 | 0 |
| Case 59 | 1 | 160,535,367 | 160,600,319 | 2 | 1 | 3 | 0 |
| Case 59 | 1 | 160,602,248 | 160,811,621 | 1 | 1 | 2 | 0 |
| Case 59 | 1 | 160,811,647 | 160,844,745 | 2 | 1 | 3 | 0 |
| Case 59 | 1 | 160,845,701 | 160,921,230 | 1 | 1 | 2 | 0 |
| Case 59 | 1 | 160,922,195 | 161,014,727 | 2 | 1 | 3 | 0 |
| Case 59 | 1 | 161,015,268 | 161,051,558 | 1 | 1 | 2 | 0 |
| Case 59 | 1 | 161,053,773 | 161,123,156 | 2 | 1 | 3 | 0 |
| Case 59 | 1 | 161,123,804 | 161,721,771 | 1 | 1 | 2 | 0 |
| Case 59 | 1 | 161,723,013 | 161,915,501 | 2 | 1 | 3 | 0 |
| Case 59 | 1 | 161,924,749 | 161,998,155 | 1 | 1 | 2 | 0 |
| Case 59 | 1 | 162,000,398 | 162,039,394 | 2 | 1 | 3 | 0 |
| Case 59 | 1 | 162,040,878 | 162,168,116 | 1 | 1 | 2 | 0 |
| Case 59 | 1 | 162,168,958 | 162,278,552 | 2 | 1 | 3 | 0 |
| Case 59 | 1 | 162,281,028 | 162,346,559 | 1 | 1 | 2 | 0 |
| Case 59 | 1 | 162,348,637 | 162,606,728 | 2 | 1 | 3 | 0 |
| Case 59 | 1 | 162,613,122 | 162,887,988 | 1 | 1 | 2 | 0 |
| Case 59 | 1 | 162,889,506 | 162,934,692 | 2 | 1 | 3 | 0 |
| Case 59 | 1 | 162,938,179 | 163,044,301 | 1 | 1 | 2 | 0 |
| Case 59 | 1 | 163,046,351 | 163,142,168 | 2 | 1 | 3 | 0 |
| Case 59 | 1 | 163,142,555 | 163,297,381 | 1 | 1 | 2 | 0 |
| Case 59 | 1 | 163,298,037 | 165,173,272 | 2 | 1 | 3 | 0 |
| Case 59 | 1 | 165,173,549 | 165,195,664 | 1 | 1 | 2 | 0 |
| Case 59 | 1 | 165,196,400 | 165,497,692 | 2 | 1 | 3 | 0 |
| Case 59 | 1 | 165,502,862 | 165,622,567 | 1 | 1 | 2 | 0 |
| Case 59 | 1 | 165,622,662 | 165,666,448 | 2 | 1 | 3 | 0 |
| Case 59 | 1 | 165,667,614 | 166,136,474 | 1 | 1 | 2 | 0 |
| Case 59 | 1 | 166,147,182 | 166,808,253 | 2 | 1 | 3 | 0 |
| Case 59 | 1 | 166,810,206 | 166,824,580 | 1 | 1 | 2 | 0 |
| Case 59 | 1 | 166,824,846 | 166,892,001 | 2 | 1 | 3 | 0 |
| Case 59 | 1 | 166,895,500 | 167,102,492 | 1 | 1 | 2 | 0 |
| Case 59 | 1 | 167,103,023 | 167,348,551 | 2 | 1 | 3 | 0 |
| Case 59 | 1 | 167,355,192 | 167,495,738 | 1 | 1 | 2 | 0 |
| Case 59 | 1 | 167,496,303 | 167,507,857 | 2 | 1 | 3 | 0 |
| Case 59 | 1 | 167,509,563 | 167,679,477 | 1 | 1 | 2 | 0 |
| Case 59 | 1 | 167,695,683 | 167,778,926 | 2 | 1 | 3 | 0 |
| Case 59 | 1 | 167,778,932 | 167,817,632 | 1 | 1 | 2 | 0 |
| Case 59 | 1 | 167,817,639 | 167,825,532 | 2 | 1 | 3 | 0 |
| Case 59 | 1 | 167,825,606 | 168,073,601 | 1 | 1 | 2 | 0 |
| Case 59 | 1 | 168,074,677 | 168,186,174 | 2 | 1 | 3 | 0 |
| Case 59 | 1 | 168,194,927 | 168,406,461 | 1 | 1 | 2 | 0 |
| Case 59 | 1 | 168,407,955 | 168,662,302 | 2 | 1 | 3 | 0 |
| Case 59 | 1 | 168,664,450 | 168,725,876 | 1 | 1 | 2 | 0 |
| Case 59 | 1 | 168,732,201 | 169,490,772 | 2 | 1 | 3 | 0 |
| Case 59 | 1 | 169,493,953 | 169,762,047 | 1 | 1 | 2 | 0 |
| Case 59 | 1 | 169,762,473 | 169,820,962 | 2 | 1 | 3 | 0 |
| Case 59 | 1 | 169,821,055 | 169,886,587 | 1 | 1 | 2 | 0 |
| Case 59 | 1 | 169,890,623 | 170,067,296 | 2 | 1 | 3 | 0 |
| Case 59 | 1 | 170,068,509 | 170,171,702 | 1 | 1 | 2 | 0 |

|         |   |             |             |   |   |   |   |
|---------|---|-------------|-------------|---|---|---|---|
| Case 59 | 1 | 170,172,417 | 170,664,237 | 2 | 1 | 3 | 0 |
| Case 59 | 1 | 170,688,935 | 170,814,360 | 1 | 1 | 2 | 0 |
| Case 59 | 1 | 170,818,339 | 170,934,301 | 2 | 1 | 3 | 0 |
| Case 59 | 1 | 170,934,311 | 171,118,840 | 1 | 1 | 2 | 0 |
| Case 59 | 1 | 171,119,021 | 171,222,141 | 2 | 1 | 3 | 0 |
| Case 59 | 1 | 171,222,180 | 171,289,803 | 1 | 1 | 2 | 0 |
| Case 59 | 1 | 171,292,017 | 171,303,818 | 2 | 1 | 3 | 0 |
| Case 59 | 1 | 171,304,819 | 171,405,186 | 1 | 1 | 2 | 0 |
| Case 59 | 1 | 171,409,515 | 171,500,154 | 2 | 1 | 3 | 0 |
| Case 59 | 1 | 171,501,752 | 171,537,387 | 1 | 1 | 2 | 0 |
| Case 59 | 1 | 171,543,476 | 171,603,547 | 2 | 1 | 3 | 0 |
| Case 59 | 1 | 171,605,081 | 171,839,720 | 1 | 1 | 2 | 0 |
| Case 59 | 1 | 171,842,607 | 172,253,585 | 2 | 1 | 3 | 0 |
| Case 59 | 1 | 172,254,193 | 172,504,825 | 1 | 1 | 2 | 0 |
| Case 59 | 1 | 172,517,567 | 172,575,959 | 2 | 1 | 3 | 0 |
| Case 59 | 1 | 172,579,244 | 172,936,636 | 1 | 1 | 2 | 0 |
| Case 59 | 1 | 172,936,702 | 173,064,279 | 2 | 1 | 3 | 0 |
| Case 59 | 1 | 173,064,777 | 173,266,578 | 1 | 1 | 2 | 0 |
| Case 59 | 1 | 173,268,672 | 173,302,872 | 2 | 1 | 3 | 0 |
| Case 59 | 1 | 173,305,632 | 173,362,457 | 1 | 1 | 2 | 0 |
| Case 59 | 1 | 173,368,454 | 173,871,806 | 2 | 1 | 3 | 0 |
| Case 59 | 1 | 173,873,176 | 173,884,075 | 1 | 1 | 2 | 0 |
| Case 59 | 1 | 173,886,216 | 175,033,141 | 2 | 1 | 3 | 0 |
| Case 59 | 1 | 175,033,798 | 175,198,786 | 1 | 1 | 2 | 0 |
| Case 59 | 1 | 175,201,727 | 175,326,303 | 2 | 1 | 3 | 0 |
| Case 59 | 1 | 175,327,147 | 175,448,463 | 1 | 1 | 2 | 0 |
| Case 59 | 1 | 175,461,844 | 175,632,470 | 2 | 1 | 3 | 0 |
| Case 59 | 1 | 175,636,696 | 175,904,809 | 1 | 1 | 2 | 0 |
| Case 59 | 1 | 175,911,554 | 176,311,597 | 2 | 1 | 3 | 0 |
| Case 59 | 1 | 176,345,142 | 177,081,676 | 1 | 1 | 2 | 0 |
| Case 59 | 1 | 177,091,092 | 177,225,056 | 2 | 1 | 3 | 0 |
| Case 59 | 1 | 177,226,503 | 177,300,379 | 1 | 1 | 2 | 0 |
| Case 59 | 1 | 177,300,809 | 177,480,934 | 2 | 1 | 3 | 0 |
| Case 59 | 1 | 177,482,125 | 177,751,488 | 1 | 1 | 2 | 0 |
| Case 59 | 1 | 177,752,701 | 177,791,110 | 2 | 1 | 3 | 0 |
| Case 59 | 1 | 177,791,775 | 177,968,616 | 1 | 1 | 2 | 0 |
| Case 59 | 1 | 177,969,239 | 177,989,327 | 2 | 1 | 3 | 0 |
| Case 59 | 1 | 177,991,255 | 178,084,797 | 1 | 1 | 2 | 0 |
| Case 59 | 1 | 178,092,233 | 178,420,787 | 2 | 1 | 3 | 0 |
| Case 59 | 1 | 178,426,850 | 178,665,593 | 1 | 1 | 2 | 0 |
| Case 59 | 1 | 178,666,488 | 179,050,593 | 2 | 1 | 3 | 0 |
| Case 59 | 1 | 179,051,300 | 179,087,875 | 1 | 1 | 2 | 0 |
| Case 59 | 1 | 179,089,491 | 179,608,461 | 2 | 1 | 3 | 0 |
| Case 59 | 1 | 179,609,549 | 179,852,074 | 1 | 1 | 2 | 0 |
| Case 59 | 1 | 179,853,844 | 180,065,048 | 2 | 1 | 3 | 0 |
| Case 59 | 1 | 180,067,988 | 180,166,008 | 1 | 1 | 2 | 0 |
| Case 59 | 1 | 180,167,090 | 180,194,498 | 2 | 1 | 3 | 0 |
| Case 59 | 1 | 180,199,545 | 180,591,237 | 1 | 1 | 2 | 0 |
| Case 59 | 1 | 180,596,196 | 180,849,494 | 2 | 1 | 3 | 0 |
| Case 59 | 1 | 180,852,364 | 180,887,289 | 1 | 1 | 2 | 0 |
| Case 59 | 1 | 180,888,910 | 181,012,229 | 2 | 1 | 3 | 0 |
| Case 59 | 1 | 181,018,422 | 181,058,084 | 1 | 1 | 2 | 0 |
| Case 59 | 1 | 181,058,796 | 181,131,180 | 2 | 1 | 3 | 0 |
| Case 59 | 1 | 181,133,024 | 181,301,619 | 1 | 1 | 2 | 0 |
| Case 59 | 1 | 181,307,883 | 181,358,407 | 2 | 1 | 3 | 0 |
| Case 59 | 1 | 181,359,880 | 181,586,946 | 1 | 1 | 2 | 0 |
| Case 59 | 1 | 181,588,041 | 181,727,273 | 2 | 1 | 3 | 0 |
| Case 59 | 1 | 181,734,600 | 182,178,482 | 1 | 1 | 2 | 0 |
| Case 59 | 1 | 182,178,847 | 182,353,075 | 2 | 1 | 3 | 0 |
| Case 59 | 1 | 182,353,781 | 182,682,811 | 1 | 1 | 2 | 0 |
| Case 59 | 1 | 182,684,087 | 183,095,375 | 2 | 1 | 3 | 0 |

|         |   |             |             |   |   |   |   |
|---------|---|-------------|-------------|---|---|---|---|
| Case 59 | 1 | 183,096,448 | 183,105,534 | 1 | 1 | 2 | 0 |
| Case 59 | 1 | 183,105,709 | 183,172,548 | 2 | 1 | 3 | 0 |
| Case 59 | 1 | 183,176,430 | 183,253,173 | 1 | 1 | 2 | 0 |
| Case 59 | 1 | 183,253,213 | 183,516,241 | 2 | 1 | 3 | 0 |
| Case 59 | 1 | 183,520,043 | 183,565,989 | 1 | 1 | 2 | 0 |
| Case 59 | 1 | 183,581,914 | 183,835,393 | 2 | 1 | 3 | 0 |
| Case 59 | 1 | 183,835,838 | 183,933,115 | 1 | 1 | 2 | 0 |
| Case 59 | 1 | 183,933,498 | 184,323,468 | 2 | 1 | 3 | 0 |
| Case 59 | 1 | 184,324,403 | 184,622,136 | 1 | 1 | 2 | 0 |
| Case 59 | 1 | 184,639,886 | 184,747,087 | 2 | 1 | 3 | 0 |
| Case 59 | 1 | 184,757,199 | 184,962,749 | 1 | 1 | 2 | 0 |
| Case 59 | 1 | 184,966,133 | 186,072,727 | 2 | 1 | 3 | 0 |
| Case 59 | 1 | 186,073,181 | 186,136,572 | 1 | 1 | 2 | 0 |
| Case 59 | 1 | 186,139,951 | 186,275,744 | 2 | 1 | 3 | 0 |
| Case 59 | 1 | 186,275,760 | 186,278,240 | 1 | 1 | 2 | 0 |
| Case 59 | 1 | 186,280,235 | 186,851,216 | 2 | 1 | 3 | 0 |
| Case 59 | 1 | 186,852,597 | 186,952,409 | 1 | 1 | 2 | 0 |
| Case 59 | 1 | 186,953,521 | 187,435,132 | 2 | 1 | 3 | 0 |
| Case 59 | 1 | 187,435,580 | 187,530,283 | 1 | 1 | 2 | 0 |
| Case 59 | 1 | 187,531,027 | 192,770,933 | 2 | 1 | 3 | 0 |
| Case 59 | 1 | 192,777,564 | 192,802,381 | 1 | 1 | 2 | 0 |
| Case 59 | 1 | 192,810,167 | 197,070,906 | 2 | 1 | 3 | 0 |
| Case 59 | 1 | 197,070,953 | 197,073,318 | 1 | 1 | 2 | 0 |
| Case 59 | 1 | 197,073,396 | 197,192,918 | 2 | 1 | 3 | 0 |
| Case 59 | 1 | 197,202,483 | 197,473,318 | 1 | 1 | 2 | 0 |
| Case 59 | 1 | 197,479,723 | 197,810,277 | 2 | 1 | 3 | 0 |
| Case 59 | 1 | 197,811,282 | 197,929,497 | 1 | 1 | 2 | 0 |
| Case 59 | 1 | 197,949,082 | 198,540,028 | 2 | 1 | 3 | 0 |
| Case 59 | 1 | 198,541,326 | 198,671,653 | 1 | 1 | 2 | 0 |
| Case 59 | 1 | 198,672,299 | 200,843,212 | 2 | 1 | 3 | 0 |
| Case 59 | 1 | 200,843,768 | 201,046,205 | 1 | 1 | 2 | 0 |
| Case 59 | 1 | 201,047,075 | 201,079,088 | 2 | 1 | 3 | 0 |
| Case 59 | 1 | 201,079,344 | 201,109,903 | 1 | 1 | 2 | 0 |
| Case 59 | 1 | 201,109,984 | 201,175,274 | 2 | 1 | 3 | 0 |
| Case 59 | 1 | 201,175,648 | 201,187,954 | 1 | 1 | 2 | 0 |
| Case 59 | 1 | 201,188,328 | 201,251,316 | 2 | 1 | 3 | 0 |
| Case 59 | 1 | 201,252,866 | 201,401,025 | 1 | 1 | 2 | 0 |
| Case 59 | 1 | 201,407,782 | 201,839,932 | 2 | 1 | 3 | 0 |
| Case 59 | 1 | 201,840,210 | 201,891,254 | 1 | 1 | 2 | 0 |
| Case 59 | 1 | 201,892,257 | 202,233,116 | 2 | 1 | 3 | 0 |
| Case 59 | 1 | 202,239,771 | 202,300,127 | 1 | 1 | 2 | 0 |
| Case 59 | 1 | 202,302,232 | 202,710,706 | 2 | 1 | 3 | 0 |
| Case 59 | 1 | 202,710,733 | 202,847,719 | 2 | 0 | 2 | 1 |
| Case 59 | 1 | 202,847,929 | 202,925,256 | 3 | 0 | 3 | 1 |
| Case 59 | 1 | 202,926,513 | 203,767,030 | 2 | 0 | 2 | 1 |
| Case 59 | 1 | 203,767,822 | 203,985,706 | 3 | 0 | 3 | 1 |
| Case 59 | 1 | 203,996,314 | 204,438,908 | 2 | 0 | 2 | 1 |
| Case 59 | 1 | 204,446,313 | 204,523,263 | 3 | 0 | 3 | 1 |
| Case 59 | 1 | 204,551,830 | 204,734,495 | 2 | 0 | 2 | 1 |
| Case 59 | 1 | 204,735,453 | 204,889,532 | 3 | 0 | 3 | 1 |
| Case 59 | 1 | 204,891,547 | 205,053,315 | 2 | 0 | 2 | 1 |
| Case 59 | 1 | 205,054,114 | 205,195,831 | 3 | 0 | 3 | 1 |
| Case 59 | 1 | 205,209,530 | 205,662,977 | 2 | 0 | 2 | 1 |
| Case 59 | 1 | 205,676,263 | 205,762,139 | 3 | 0 | 3 | 1 |
| Case 59 | 1 | 205,762,406 | 207,286,467 | 2 | 0 | 2 | 1 |
| Case 59 | 1 | 207,287,187 | 207,578,284 | 3 | 0 | 3 | 1 |
| Case 59 | 1 | 207,582,256 | 207,787,763 | 2 | 0 | 2 | 1 |
| Case 59 | 1 | 207,790,018 | 208,004,898 | 3 | 0 | 3 | 1 |
| Case 59 | 1 | 208,017,285 | 208,864,258 | 2 | 0 | 2 | 1 |
| Case 59 | 1 | 208,866,218 | 209,118,888 | 3 | 0 | 3 | 1 |
| Case 59 | 1 | 209,121,677 | 209,617,663 | 2 | 0 | 2 | 1 |



|         |   |             |             |   |   |   |   |
|---------|---|-------------|-------------|---|---|---|---|
| Case 59 | 1 | 209,619,557 | 209,720,842 | 3 | 0 | 3 | 1 |
| Case 59 | 1 | 209,722,772 | 210,019,824 | 2 | 0 | 2 | 1 |
| Case 59 | 1 | 210,020,971 | 210,399,652 | 3 | 0 | 3 | 1 |
| Case 59 | 1 | 210,406,106 | 211,088,400 | 2 | 0 | 2 | 1 |
| Case 59 | 1 | 211,089,156 | 211,645,082 | 3 | 0 | 3 | 1 |
| Case 59 | 1 | 211,649,327 | 211,831,380 | 2 | 0 | 2 | 1 |
| Case 59 | 1 | 211,832,827 | 212,324,488 | 3 | 0 | 3 | 1 |
| Case 59 | 1 | 212,324,535 | 212,903,089 | 2 | 0 | 2 | 1 |
| Case 59 | 1 | 212,909,744 | 213,071,341 | 3 | 0 | 3 | 1 |
| Case 59 | 1 | 213,073,013 | 213,147,400 | 2 | 0 | 2 | 1 |
| Case 59 | 1 | 213,161,171 | 213,437,680 | 3 | 0 | 3 | 1 |
| Case 59 | 1 | 213,449,418 | 214,083,466 | 2 | 0 | 2 | 1 |
| Case 59 | 1 | 214,084,142 | 214,457,286 | 3 | 0 | 3 | 1 |
| Case 59 | 1 | 214,461,354 | 214,820,239 | 2 | 0 | 2 | 1 |
| Case 59 | 1 | 214,820,265 | 215,799,170 | 3 | 0 | 3 | 1 |
| Case 59 | 1 | 215,802,169 | 215,863,578 | 2 | 0 | 2 | 1 |
| Case 59 | 1 | 215,868,952 | 215,990,508 | 3 | 0 | 3 | 1 |
| Case 59 | 1 | 215,999,616 | 216,062,396 | 2 | 0 | 2 | 1 |
| Case 59 | 1 | 216,063,246 | 216,220,364 | 3 | 0 | 3 | 1 |
| Case 59 | 1 | 216,221,905 | 216,249,570 | 2 | 0 | 2 | 1 |
| Case 59 | 1 | 216,251,594 | 216,905,328 | 3 | 0 | 3 | 1 |
| Case 59 | 1 | 216,905,611 | 217,168,483 | 2 | 0 | 2 | 1 |
| Case 59 | 1 | 217,172,606 | 218,038,479 | 3 | 0 | 3 | 1 |
| Case 59 | 1 | 218,044,052 | 218,281,230 | 2 | 0 | 2 | 1 |
| Case 59 | 1 | 218,282,929 | 218,393,022 | 3 | 0 | 3 | 1 |
| Case 59 | 1 | 218,397,580 | 218,587,636 | 2 | 0 | 2 | 1 |
| Case 59 | 1 | 218,596,461 | 219,470,069 | 3 | 0 | 3 | 1 |
| Case 59 | 1 | 219,470,417 | 219,636,951 | 2 | 0 | 2 | 1 |
| Case 59 | 1 | 219,641,900 | 219,748,779 | 3 | 0 | 3 | 1 |
| Case 59 | 1 | 219,750,717 | 219,865,236 | 2 | 0 | 2 | 1 |
| Case 59 | 1 | 219,866,299 | 219,931,859 | 3 | 0 | 3 | 1 |
| Case 59 | 1 | 219,934,116 | 220,146,709 | 2 | 0 | 2 | 1 |
| Case 59 | 1 | 220,151,999 | 220,379,347 | 3 | 0 | 3 | 1 |
| Case 59 | 1 | 220,380,819 | 221,244,372 | 2 | 0 | 2 | 1 |
| Case 59 | 1 | 221,255,989 | 221,876,222 | 3 | 0 | 3 | 1 |
| Case 59 | 1 | 221,879,569 | 222,718,718 | 2 | 0 | 2 | 1 |
| Case 59 | 1 | 222,719,037 | 222,801,103 | 3 | 0 | 3 | 1 |
| Case 59 | 1 | 222,801,448 | 222,803,457 | 2 | 0 | 2 | 1 |
| Case 59 | 1 | 222,803,465 | 223,176,145 | 3 | 0 | 3 | 1 |
| Case 59 | 1 | 223,177,116 | 223,575,202 | 2 | 0 | 2 | 1 |
| Case 59 | 1 | 223,579,329 | 223,644,406 | 3 | 0 | 3 | 1 |
| Case 59 | 1 | 223,645,256 | 223,962,010 | 2 | 0 | 2 | 1 |
| Case 59 | 1 | 223,962,660 | 224,495,852 | 3 | 0 | 3 | 1 |
| Case 59 | 1 | 224,495,853 | 224,971,229 | 2 | 0 | 2 | 1 |
| Case 59 | 1 | 224,972,014 | 225,555,679 | 3 | 0 | 3 | 1 |
| Case 59 | 1 | 225,561,346 | 225,676,330 | 2 | 0 | 2 | 1 |
| Case 59 | 1 | 225,679,697 | 225,909,711 | 3 | 0 | 3 | 1 |
| Case 59 | 1 | 225,909,815 | 226,313,525 | 2 | 0 | 2 | 1 |
| Case 59 | 1 | 226,317,841 | 226,548,791 | 3 | 0 | 3 | 1 |
| Case 59 | 1 | 226,549,498 | 227,191,656 | 2 | 0 | 2 | 1 |
| Case 59 | 1 | 227,192,477 | 227,602,770 | 3 | 0 | 3 | 1 |
| Case 59 | 1 | 227,603,016 | 227,839,384 | 2 | 0 | 2 | 1 |
| Case 59 | 1 | 227,842,385 | 228,424,600 | 3 | 0 | 3 | 1 |
| Case 59 | 1 | 228,427,193 | 228,468,458 | 2 | 0 | 2 | 1 |
| Case 59 | 1 | 228,469,801 | 228,475,581 | 3 | 0 | 3 | 1 |
| Case 59 | 1 | 228,475,604 | 228,505,739 | 2 | 0 | 2 | 1 |
| Case 59 | 1 | 228,506,687 | 228,558,725 | 3 | 0 | 3 | 1 |
| Case 59 | 1 | 228,558,892 | 228,741,147 | 2 | 0 | 2 | 1 |
| Case 59 | 1 | 228,783,329 | 228,995,219 | 3 | 0 | 3 | 1 |
| Case 59 | 1 | 228,996,622 | 229,076,902 | 2 | 0 | 2 | 1 |
| Case 59 | 1 | 229,077,631 | 229,642,652 | 3 | 0 | 3 | 1 |

|         |   |             |             |   |   |   |   |
|---------|---|-------------|-------------|---|---|---|---|
| Case 59 | 1 | 229,643,815 | 230,734,649 | 2 | 0 | 2 | 1 |
| Case 59 | 1 | 230,735,580 | 230,822,832 | 3 | 0 | 3 | 1 |
| Case 59 | 1 | 230,822,903 | 231,054,409 | 2 | 0 | 2 | 1 |
| Case 59 | 1 | 231,056,266 | 231,090,578 | 3 | 0 | 3 | 1 |
| Case 59 | 1 | 231,097,042 | 231,474,181 | 2 | 0 | 2 | 1 |
| Case 59 | 1 | 231,476,789 | 231,816,842 | 3 | 0 | 3 | 1 |
| Case 59 | 1 | 231,819,050 | 232,073,128 | 2 | 0 | 2 | 1 |
| Case 59 | 1 | 232,074,973 | 232,227,786 | 3 | 0 | 3 | 1 |
| Case 59 | 1 | 232,227,916 | 232,650,941 | 2 | 0 | 2 | 1 |
| Case 59 | 1 | 232,651,909 | 232,873,994 | 3 | 0 | 3 | 1 |
| Case 59 | 1 | 232,876,993 | 232,942,505 | 2 | 0 | 2 | 1 |
| Case 59 | 1 | 232,942,679 | 232,977,131 | 3 | 0 | 3 | 1 |
| Case 59 | 1 | 232,982,116 | 233,397,855 | 2 | 0 | 2 | 1 |
| Case 59 | 1 | 233,397,909 | 233,742,345 | 3 | 0 | 3 | 1 |
| Case 59 | 1 | 233,743,103 | 233,879,281 | 2 | 0 | 2 | 1 |
| Case 59 | 1 | 233,887,113 | 234,011,119 | 3 | 0 | 3 | 1 |
| Case 59 | 1 | 234,011,496 | 234,410,567 | 2 | 0 | 2 | 1 |
| Case 59 | 1 | 234,411,855 | 234,656,596 | 3 | 0 | 3 | 1 |
| Case 59 | 1 | 234,658,824 | 235,137,472 | 2 | 0 | 2 | 1 |
| Case 59 | 1 | 235,152,757 | 235,647,783 | 3 | 0 | 3 | 1 |
| Case 59 | 1 | 235,652,513 | 235,821,815 | 2 | 0 | 2 | 1 |
| Case 59 | 1 | 235,826,583 | 236,087,324 | 3 | 0 | 3 | 1 |
| Case 59 | 1 | 236,095,773 | 236,346,213 | 2 | 0 | 2 | 1 |
| Case 59 | 1 | 236,347,143 | 236,441,037 | 3 | 0 | 3 | 1 |
| Case 59 | 1 | 236,442,464 | 236,666,907 | 2 | 0 | 2 | 1 |
| Case 59 | 1 | 236,668,845 | 236,682,308 | 3 | 0 | 3 | 1 |
| Case 59 | 1 | 236,684,794 | 236,728,150 | 2 | 0 | 2 | 1 |
| Case 59 | 1 | 236,729,956 | 236,895,000 | 3 | 0 | 3 | 1 |
| Case 59 | 1 | 236,896,619 | 237,303,919 | 2 | 0 | 2 | 1 |
| Case 59 | 1 | 237,304,812 | 237,617,757 | 3 | 0 | 3 | 1 |
| Case 59 | 1 | 237,619,934 | 237,785,217 | 2 | 0 | 2 | 1 |
| Case 59 | 1 | 237,788,786 | 237,975,768 | 3 | 0 | 3 | 1 |
| Case 59 | 1 | 237,977,057 | 238,128,633 | 2 | 0 | 2 | 1 |
| Case 59 | 1 | 238,154,347 | 238,725,567 | 3 | 0 | 3 | 1 |
| Case 59 | 1 | 238,725,762 | 238,783,811 | 2 | 0 | 2 | 1 |
| Case 59 | 1 | 238,785,675 | 239,916,015 | 3 | 0 | 3 | 1 |
| Case 59 | 1 | 239,924,343 | 239,985,876 | 2 | 0 | 2 | 1 |
| Case 59 | 1 | 239,988,849 | 240,025,977 | 3 | 0 | 3 | 1 |
| Case 59 | 1 | 240,030,399 | 240,072,322 | 2 | 0 | 2 | 1 |
| Case 59 | 1 | 240,072,504 | 240,135,971 | 3 | 0 | 3 | 1 |
| Case 59 | 1 | 240,136,510 | 240,338,827 | 2 | 0 | 2 | 1 |
| Case 59 | 1 | 240,339,812 | 240,600,551 | 3 | 0 | 3 | 1 |
| Case 59 | 1 | 240,601,795 | 240,667,092 | 2 | 0 | 2 | 1 |
| Case 59 | 1 | 240,667,391 | 240,891,609 | 3 | 0 | 3 | 1 |
| Case 59 | 1 | 240,893,967 | 241,608,403 | 2 | 0 | 2 | 1 |
| Case 59 | 1 | 241,611,462 | 241,712,992 | 3 | 0 | 3 | 1 |
| Case 59 | 1 | 241,715,422 | 241,846,629 | 2 | 0 | 2 | 1 |
| Case 59 | 1 | 241,849,047 | 242,074,809 | 3 | 0 | 3 | 1 |
| Case 59 | 1 | 242,080,853 | 242,270,341 | 2 | 0 | 2 | 1 |
| Case 59 | 1 | 242,274,908 | 242,359,678 | 3 | 0 | 3 | 1 |
| Case 59 | 1 | 242,360,179 | 242,380,948 | 2 | 0 | 2 | 1 |
| Case 59 | 1 | 242,381,784 | 242,539,072 | 3 | 0 | 3 | 1 |
| Case 59 | 1 | 242,545,240 | 242,884,679 | 2 | 0 | 2 | 1 |
| Case 59 | 1 | 242,890,160 | 243,542,050 | 3 | 0 | 3 | 1 |
| Case 59 | 1 | 243,546,954 | 243,677,372 | 2 | 0 | 2 | 1 |
| Case 59 | 1 | 243,678,389 | 244,161,728 | 3 | 0 | 3 | 1 |
| Case 59 | 1 | 244,161,982 | 244,545,766 | 2 | 0 | 2 | 1 |
| Case 59 | 1 | 244,552,355 | 245,205,890 | 3 | 0 | 3 | 1 |
| Case 59 | 1 | 245,219,054 | 245,936,738 | 2 | 0 | 2 | 1 |
| Case 59 | 1 | 245,939,067 | 245,979,357 | 3 | 0 | 3 | 1 |
| Case 59 | 1 | 245,986,815 | 246,178,188 | 2 | 0 | 2 | 1 |

|         |   |             |             |   |   |   |   |
|---------|---|-------------|-------------|---|---|---|---|
| Case 59 | 1 | 246,181,070 | 246,661,236 | 3 | 0 | 3 | 1 |
| Case 59 | 1 | 246,664,442 | 246,755,204 | 2 | 0 | 2 | 1 |
| Case 59 | 1 | 246,757,449 | 246,922,356 | 3 | 0 | 3 | 1 |
| Case 59 | 1 | 246,922,422 | 246,963,019 | 2 | 0 | 2 | 1 |
| Case 59 | 1 | 246,968,455 | 247,364,063 | 3 | 0 | 3 | 1 |
| Case 59 | 1 | 247,366,124 | 247,552,549 | 2 | 0 | 2 | 1 |
| Case 59 | 1 | 247,554,949 | 247,577,079 | 3 | 0 | 3 | 1 |
| Case 59 | 1 | 247,578,441 | 248,411,889 | 2 | 0 | 2 | 1 |
| Case 59 | 1 | 248,415,662 | 248,511,674 | 3 | 0 | 3 | 1 |
| Case 59 | 1 | 248,512,255 | 248,687,952 | 2 | 0 | 2 | 1 |
| Case 59 | 1 | 248,688,317 | 248,790,425 | 0 | 0 | 0 | 0 |
| Case 59 | 1 | 248,801,588 | 249,218,992 | 2 | 0 | 2 | 1 |
| Case 59 | 2 | 18,674      | 11,319,660  | 1 | 1 | 2 | 0 |
| Case 59 | 2 | 11,320,668  | 11,398,736  | 2 | 1 | 3 | 0 |
| Case 59 | 2 | 11,401,165  | 17,697,252  | 1 | 1 | 2 | 0 |
| Case 59 | 2 | 17,697,404  | 17,698,896  | 2 | 1 | 3 | 0 |
| Case 59 | 2 | 17,698,904  | 20,090,739  | 1 | 1 | 2 | 0 |
| Case 59 | 2 | 20,093,135  | 20,178,641  | 2 | 1 | 3 | 0 |
| Case 59 | 2 | 20,182,293  | 44,149,442  | 1 | 1 | 2 | 0 |
| Case 59 | 2 | 44,156,440  | 44,174,907  | 2 | 1 | 3 | 0 |
| Case 59 | 2 | 44,176,742  | 55,536,808  | 1 | 1 | 2 | 0 |
| Case 59 | 2 | 55,539,905  | 55,576,666  | 2 | 1 | 3 | 0 |
| Case 59 | 2 | 55,582,820  | 84,800,621  | 1 | 1 | 2 | 0 |
| Case 59 | 2 | 84,800,898  | 84,804,522  | 2 | 1 | 3 | 0 |
| Case 59 | 2 | 84,806,724  | 92,081,640  | 1 | 1 | 2 | 0 |
| Case 59 | 2 | 95,429,424  | 109,086,676 | 1 | 1 | 2 | 0 |
| Case 59 | 2 | 109,086,737 | 109,094,759 | 2 | 1 | 3 | 0 |
| Case 59 | 2 | 109,098,229 | 150,425,265 | 1 | 1 | 2 | 0 |
| Case 59 | 2 | 150,425,584 | 150,438,708 | 2 | 1 | 3 | 0 |
| Case 59 | 2 | 150,443,604 | 177,178,771 | 1 | 1 | 2 | 0 |
| Case 59 | 2 | 177,191,571 | 177,198,846 | 2 | 1 | 3 | 0 |
| Case 59 | 2 | 177,199,125 | 202,400,884 | 1 | 1 | 2 | 0 |
| Case 59 | 2 | 202,400,987 | 202,492,871 | 2 | 1 | 3 | 0 |
| Case 59 | 2 | 202,493,504 | 219,319,666 | 1 | 1 | 2 | 0 |
| Case 59 | 2 | 219,338,789 | 219,409,308 | 2 | 1 | 3 | 0 |
| Case 59 | 2 | 219,411,735 | 243,048,760 | 1 | 1 | 2 | 0 |
| Case 59 | 3 | 61,495      | 4,412,129   | 2 | 0 | 2 | 1 |
| Case 59 | 3 | 4,414,011   | 4,437,484   | 3 | 0 | 3 | 1 |
| Case 59 | 3 | 4,445,436   | 57,401,266  | 2 | 0 | 2 | 1 |
| Case 59 | 3 | 57,405,152  | 57,494,251  | 3 | 0 | 3 | 1 |
| Case 59 | 3 | 57,494,263  | 60,189,471  | 2 | 0 | 2 | 1 |
| Case 59 | 3 | 60,192,208  | 60,523,330  | 0 | 0 | 0 | 0 |
| Case 59 | 3 | 60,531,242  | 60,705,025  | 2 | 0 | 2 | 1 |
| Case 59 | 3 | 60,708,889  | 60,844,642  | 0 | 0 | 0 | 0 |
| Case 59 | 3 | 60,853,686  | 60,933,934  | 2 | 0 | 2 | 1 |
| Case 59 | 3 | 60,937,330  | 61,232,197  | 0 | 0 | 0 | 0 |
| Case 59 | 3 | 61,236,328  | 65,185,849  | 2 | 0 | 2 | 1 |
| Case 59 | 3 | 65,191,847  | 65,214,533  | 0 | 0 | 0 | 0 |
| Case 59 | 3 | 65,215,804  | 90,442,925  | 2 | 0 | 2 | 1 |
| Case 59 | 3 | 93,537,290  | 93,738,694  | 2 | 0 | 2 | 1 |
| Case 59 | 3 | 93,742,842  | 93,769,677  | 3 | 0 | 3 | 1 |
| Case 59 | 3 | 93,769,712  | 108,264,948 | 2 | 0 | 2 | 1 |
| Case 59 | 3 | 108,271,082 | 108,301,920 | 3 | 0 | 3 | 1 |
| Case 59 | 3 | 108,303,989 | 121,509,881 | 2 | 0 | 2 | 1 |
| Case 59 | 3 | 121,513,185 | 121,610,395 | 3 | 0 | 3 | 1 |
| Case 59 | 3 | 121,612,456 | 142,178,115 | 2 | 0 | 2 | 1 |
| Case 59 | 3 | 142,178,118 | 142,261,533 | 3 | 0 | 3 | 1 |
| Case 59 | 3 | 142,266,679 | 148,744,625 | 2 | 0 | 2 | 1 |
| Case 59 | 3 | 148,747,119 | 148,820,658 | 3 | 0 | 3 | 1 |
| Case 59 | 3 | 148,835,441 | 160,129,834 | 2 | 0 | 2 | 1 |
| Case 59 | 3 | 160,130,110 | 160,153,305 | 3 | 0 | 3 | 1 |

|         |   |             |             |   |   |   |   |
|---------|---|-------------|-------------|---|---|---|---|
| Case 59 | 3 | 160,154,258 | 164,706,642 | 2 | 0 | 2 | 1 |
| Case 59 | 3 | 164,709,250 | 164,799,079 | 3 | 0 | 3 | 1 |
| Case 59 | 3 | 164,807,679 | 196,767,854 | 2 | 0 | 2 | 1 |
| Case 59 | 3 | 196,769,797 | 197,009,609 | 3 | 0 | 3 | 1 |
| Case 59 | 3 | 197,026,927 | 197,838,262 | 2 | 0 | 2 | 1 |
| Case 59 | 4 | 71,566      | 49,620,898  | 1 | 1 | 2 | 0 |
| Case 59 | 4 | 52,697,856  | 70,592,638  | 1 | 1 | 2 | 0 |
| Case 59 | 4 | 70,592,790  | 70,599,925  | 2 | 1 | 3 | 0 |
| Case 59 | 4 | 70,599,952  | 102,792,085 | 1 | 1 | 2 | 0 |
| Case 59 | 4 | 102,792,354 | 102,839,254 | 2 | 1 | 3 | 0 |
| Case 59 | 4 | 102,839,287 | 122,774,917 | 1 | 1 | 2 | 0 |
| Case 59 | 4 | 122,780,167 | 122,800,971 | 2 | 1 | 3 | 0 |
| Case 59 | 4 | 122,805,872 | 190,963,766 | 1 | 1 | 2 | 0 |
| Case 59 | 5 | 38,139      | 37,128,315  | 1 | 1 | 2 | 0 |
| Case 59 | 5 | 37,138,835  | 37,153,871  | 2 | 1 | 3 | 0 |
| Case 59 | 5 | 37,153,928  | 46,399,093  | 1 | 1 | 2 | 0 |
| Case 59 | 5 | 49,457,282  | 61,769,985  | 1 | 1 | 2 | 0 |
| Case 59 | 5 | 61,772,530  | 61,811,328  | 2 | 1 | 3 | 0 |
| Case 59 | 5 | 61,811,970  | 65,268,670  | 1 | 1 | 2 | 0 |
| Case 59 | 5 | 65,288,668  | 65,324,151  | 2 | 1 | 3 | 0 |
| Case 59 | 5 | 65,330,009  | 108,168,024 | 1 | 1 | 2 | 0 |
| Case 59 | 5 | 108,168,579 | 108,243,615 | 2 | 1 | 3 | 0 |
| Case 59 | 5 | 108,250,768 | 110,441,042 | 1 | 1 | 2 | 0 |
| Case 59 | 5 | 110,441,044 | 110,461,298 | 2 | 1 | 3 | 0 |
| Case 59 | 5 | 110,462,230 | 139,658,794 | 1 | 1 | 2 | 0 |
| Case 59 | 5 | 139,661,097 | 139,931,620 | 2 | 0 | 2 | 1 |
| Case 59 | 5 | 139,931,629 | 139,931,643 | 0 | 0 | 0 | 0 |
| Case 59 | 5 | 139,931,644 | 139,931,644 | 2 | 0 | 2 | 1 |
| Case 59 | 5 | 139,931,646 | 139,931,740 | 1 | 0 | 1 | 0 |
| Case 59 | 5 | 139,936,760 | 180,693,127 | 1 | 1 | 2 | 0 |
| Case 59 | 6 | 108,666     | 8,990,207   | 1 | 1 | 2 | 0 |
| Case 59 | 6 | 8,990,652   | 8,999,646   | 2 | 1 | 3 | 0 |
| Case 59 | 6 | 8,999,962   | 42,123,317  | 1 | 1 | 2 | 0 |
| Case 59 | 6 | 42,125,482  | 42,125,482  | 2 | 0 | 2 | 1 |
| Case 59 | 6 | 42,126,399  | 42,138,533  | 1 | 0 | 1 | 0 |
| Case 59 | 6 | 42,139,825  | 58,752,089  | 1 | 1 | 2 | 0 |
| Case 59 | 6 | 61,891,118  | 84,871,572  | 1 | 1 | 2 | 0 |
| Case 59 | 6 | 84,879,058  | 84,930,825  | 2 | 1 | 3 | 0 |
| Case 59 | 6 | 84,935,635  | 86,221,771  | 1 | 1 | 2 | 0 |
| Case 59 | 6 | 86,223,935  | 86,284,078  | 2 | 1 | 3 | 0 |
| Case 59 | 6 | 86,289,415  | 103,169,903 | 1 | 1 | 2 | 0 |
| Case 59 | 6 | 103,175,290 | 103,225,137 | 2 | 1 | 3 | 0 |
| Case 59 | 6 | 103,225,448 | 170,980,171 | 1 | 1 | 2 | 0 |
| Case 59 | 7 | 44,935      | 4,091,283   | 2 | 1 | 3 | 0 |
| Case 59 | 7 | 4,105,705   | 4,228,553   | 1 | 1 | 2 | 0 |
| Case 59 | 7 | 4,228,898   | 11,663,252  | 2 | 1 | 3 | 0 |
| Case 59 | 7 | 11,665,731  | 11,676,390  | 1 | 1 | 2 | 0 |
| Case 59 | 7 | 11,676,694  | 18,039,252  | 2 | 1 | 3 | 0 |
| Case 59 | 7 | 18,040,264  | 18,083,032  | 1 | 1 | 2 | 0 |
| Case 59 | 7 | 18,085,049  | 21,826,035  | 2 | 1 | 3 | 0 |
| Case 59 | 7 | 21,826,284  | 21,860,316  | 1 | 1 | 2 | 0 |
| Case 59 | 7 | 21,861,028  | 24,742,437  | 2 | 1 | 3 | 0 |
| Case 59 | 7 | 24,742,438  | 24,784,057  | 1 | 1 | 2 | 0 |
| Case 59 | 7 | 24,784,260  | 26,581,796  | 2 | 1 | 3 | 0 |
| Case 59 | 7 | 26,582,309  | 26,685,929  | 1 | 1 | 2 | 0 |
| Case 59 | 7 | 26,688,808  | 27,121,456  | 2 | 1 | 3 | 0 |
| Case 59 | 7 | 27,130,276  | 27,300,262  | 1 | 1 | 2 | 0 |
| Case 59 | 7 | 27,301,441  | 27,875,454  | 2 | 1 | 3 | 0 |
| Case 59 | 7 | 27,879,473  | 27,922,780  | 1 | 1 | 2 | 0 |
| Case 59 | 7 | 27,929,030  | 29,920,967  | 2 | 1 | 3 | 0 |
| Case 59 | 7 | 29,921,360  | 29,980,024  | 1 | 1 | 2 | 0 |

|         |   |             |             |   |   |   |   |
|---------|---|-------------|-------------|---|---|---|---|
| Case 59 | 7 | 29,980,471  | 30,761,210  | 2 | 1 | 3 | 0 |
| Case 59 | 7 | 30,761,852  | 30,937,178  | 1 | 1 | 2 | 0 |
| Case 59 | 7 | 30,938,167  | 31,670,531  | 2 | 1 | 3 | 0 |
| Case 59 | 7 | 31,672,870  | 31,720,475  | 1 | 1 | 2 | 0 |
| Case 59 | 7 | 31,725,977  | 34,103,553  | 2 | 1 | 3 | 0 |
| Case 59 | 7 | 34,107,393  | 34,174,173  | 1 | 1 | 2 | 0 |
| Case 59 | 7 | 34,178,283  | 34,886,234  | 2 | 1 | 3 | 0 |
| Case 59 | 7 | 34,886,374  | 34,944,778  | 1 | 1 | 2 | 0 |
| Case 59 | 7 | 34,971,584  | 41,989,362  | 2 | 1 | 3 | 0 |
| Case 59 | 7 | 41,989,780  | 42,020,130  | 1 | 1 | 2 | 0 |
| Case 59 | 7 | 42,030,686  | 42,813,490  | 2 | 1 | 3 | 0 |
| Case 59 | 7 | 42,823,075  | 43,083,386  | 1 | 1 | 2 | 0 |
| Case 59 | 7 | 43,108,258  | 44,147,041  | 2 | 1 | 3 | 0 |
| Case 59 | 7 | 44,147,293  | 44,189,023  | 1 | 1 | 2 | 0 |
| Case 59 | 7 | 44,189,274  | 45,010,270  | 2 | 1 | 3 | 0 |
| Case 59 | 7 | 45,010,549  | 45,186,727  | 1 | 1 | 2 | 0 |
| Case 59 | 7 | 45,190,414  | 48,074,332  | 2 | 1 | 3 | 0 |
| Case 59 | 7 | 48,080,972  | 48,194,935  | 1 | 1 | 2 | 0 |
| Case 59 | 7 | 48,196,475  | 50,573,325  | 2 | 1 | 3 | 0 |
| Case 59 | 7 | 50,573,333  | 50,611,735  | 1 | 1 | 2 | 0 |
| Case 59 | 7 | 50,611,764  | 51,029,101  | 2 | 1 | 3 | 0 |
| Case 59 | 7 | 51,029,371  | 51,111,332  | 1 | 1 | 2 | 0 |
| Case 59 | 7 | 51,111,403  | 51,420,327  | 2 | 1 | 3 | 0 |
| Case 59 | 7 | 51,423,203  | 51,680,811  | 1 | 1 | 2 | 0 |
| Case 59 | 7 | 51,682,201  | 56,131,123  | 2 | 1 | 3 | 0 |
| Case 59 | 7 | 56,136,260  | 56,195,952  | 1 | 1 | 2 | 0 |
| Case 59 | 7 | 56,202,644  | 58,019,061  | 2 | 1 | 3 | 0 |
| Case 59 | 7 | 61,056,053  | 68,113,660  | 2 | 1 | 3 | 0 |
| Case 59 | 7 | 68,125,403  | 68,323,146  | 1 | 1 | 2 | 0 |
| Case 59 | 7 | 68,326,660  | 70,811,708  | 2 | 1 | 3 | 0 |
| Case 59 | 7 | 70,815,845  | 71,035,420  | 1 | 1 | 2 | 0 |
| Case 59 | 7 | 71,037,932  | 75,610,420  | 2 | 1 | 3 | 0 |
| Case 59 | 7 | 75,610,876  | 75,620,641  | 1 | 1 | 2 | 0 |
| Case 59 | 7 | 75,621,511  | 76,054,389  | 2 | 1 | 3 | 0 |
| Case 59 | 7 | 76,054,543  | 76,144,561  | 1 | 1 | 2 | 0 |
| Case 59 | 7 | 76,161,400  | 77,639,656  | 2 | 1 | 3 | 0 |
| Case 59 | 7 | 77,641,545  | 77,771,770  | 1 | 1 | 2 | 0 |
| Case 59 | 7 | 77,773,132  | 82,532,371  | 2 | 1 | 3 | 0 |
| Case 59 | 7 | 82,534,369  | 82,586,041  | 1 | 1 | 2 | 0 |
| Case 59 | 7 | 82,595,219  | 82,761,250  | 2 | 1 | 3 | 0 |
| Case 59 | 7 | 82,763,709  | 82,818,143  | 1 | 1 | 2 | 0 |
| Case 59 | 7 | 82,823,924  | 88,965,021  | 2 | 1 | 3 | 0 |
| Case 59 | 7 | 88,965,036  | 88,966,204  | 1 | 1 | 2 | 0 |
| Case 59 | 7 | 88,969,883  | 94,274,361  | 2 | 1 | 3 | 0 |
| Case 59 | 7 | 94,281,335  | 94,294,982  | 1 | 1 | 2 | 0 |
| Case 59 | 7 | 94,296,769  | 97,816,327  | 2 | 1 | 3 | 0 |
| Case 59 | 7 | 97,817,321  | 97,937,012  | 1 | 1 | 2 | 0 |
| Case 59 | 7 | 97,937,061  | 98,963,340  | 2 | 1 | 3 | 0 |
| Case 59 | 7 | 98,974,588  | 99,103,684  | 1 | 1 | 2 | 0 |
| Case 59 | 7 | 99,104,080  | 99,693,428  | 2 | 1 | 3 | 0 |
| Case 59 | 7 | 99,693,552  | 99,725,875  | 1 | 1 | 2 | 0 |
| Case 59 | 7 | 99,736,059  | 99,751,017  | 2 | 1 | 3 | 0 |
| Case 59 | 7 | 99,751,281  | 99,786,537  | 1 | 1 | 2 | 0 |
| Case 59 | 7 | 99,787,106  | 99,818,185  | 2 | 1 | 3 | 0 |
| Case 59 | 7 | 99,818,284  | 99,996,919  | 1 | 1 | 2 | 0 |
| Case 59 | 7 | 99,997,218  | 100,634,356 | 2 | 1 | 3 | 0 |
| Case 59 | 7 | 100,634,358 | 100,686,500 | 1 | 1 | 2 | 0 |
| Case 59 | 7 | 100,686,693 | 101,923,380 | 2 | 1 | 3 | 0 |
| Case 59 | 7 | 101,923,411 | 102,113,909 | 1 | 1 | 2 | 0 |
| Case 59 | 7 | 102,334,106 | 121,649,223 | 2 | 1 | 3 | 0 |
| Case 59 | 7 | 121,650,388 | 121,664,914 | 1 | 1 | 2 | 0 |

|         |   |             |             |   |   |   |   |
|---------|---|-------------|-------------|---|---|---|---|
| Case 59 | 7 | 121,668,320 | 122,335,352 | 2 | 1 | 3 | 0 |
| Case 59 | 7 | 122,338,104 | 122,493,144 | 1 | 1 | 2 | 0 |
| Case 59 | 7 | 122,495,375 | 127,220,918 | 2 | 1 | 3 | 0 |
| Case 59 | 7 | 127,222,318 | 127,241,980 | 1 | 1 | 2 | 0 |
| Case 59 | 7 | 127,246,903 | 129,992,509 | 2 | 1 | 3 | 0 |
| Case 59 | 7 | 129,999,473 | 130,040,589 | 1 | 1 | 2 | 0 |
| Case 59 | 7 | 130,041,748 | 131,780,255 | 2 | 1 | 3 | 0 |
| Case 59 | 7 | 131,783,062 | 131,832,704 | 1 | 1 | 2 | 0 |
| Case 59 | 7 | 131,834,858 | 134,017,912 | 2 | 1 | 3 | 0 |
| Case 59 | 7 | 134,019,192 | 134,143,814 | 1 | 1 | 2 | 0 |
| Case 59 | 7 | 134,144,485 | 134,510,505 | 2 | 1 | 3 | 0 |
| Case 59 | 7 | 134,512,591 | 134,618,713 | 1 | 1 | 2 | 0 |
| Case 59 | 7 | 134,625,880 | 134,835,350 | 2 | 1 | 3 | 0 |
| Case 59 | 7 | 134,841,935 | 134,918,608 | 1 | 1 | 2 | 0 |
| Case 59 | 7 | 134,923,239 | 137,496,871 | 2 | 1 | 3 | 0 |
| Case 59 | 7 | 137,506,041 | 137,590,808 | 1 | 1 | 2 | 0 |
| Case 59 | 7 | 137,595,253 | 138,573,687 | 2 | 1 | 3 | 0 |
| Case 59 | 7 | 138,574,993 | 138,622,572 | 1 | 1 | 2 | 0 |
| Case 59 | 7 | 138,626,175 | 139,259,911 | 2 | 1 | 3 | 0 |
| Case 59 | 7 | 139,263,879 | 139,546,615 | 1 | 1 | 2 | 0 |
| Case 59 | 7 | 139,546,643 | 140,224,024 | 2 | 1 | 3 | 0 |
| Case 59 | 7 | 140,225,574 | 140,397,792 | 1 | 1 | 2 | 0 |
| Case 59 | 7 | 140,402,382 | 141,456,192 | 2 | 1 | 3 | 0 |
| Case 59 | 7 | 141,463,914 | 141,687,327 | 1 | 1 | 2 | 0 |
| Case 59 | 7 | 141,689,666 | 142,423,289 | 2 | 1 | 3 | 0 |
| Case 59 | 7 | 142,424,782 | 143,018,485 | 1 | 1 | 2 | 0 |
| Case 59 | 7 | 143,020,649 | 143,076,225 | 2 | 1 | 3 | 0 |
| Case 59 | 7 | 143,076,781 | 143,097,100 | 1 | 1 | 2 | 0 |
| Case 59 | 7 | 143,097,110 | 143,657,104 | 2 | 1 | 3 | 0 |
| Case 59 | 7 | 143,657,178 | 143,718,543 | 1 | 1 | 2 | 0 |
| Case 59 | 7 | 143,723,137 | 143,741,610 | 2 | 1 | 3 | 0 |
| Case 59 | 7 | 143,747,497 | 143,748,430 | 1 | 1 | 2 | 0 |
| Case 59 | 7 | 143,752,228 | 143,791,977 | 2 | 1 | 3 | 0 |
| Case 59 | 7 | 143,792,472 | 143,826,980 | 1 | 1 | 2 | 0 |
| Case 59 | 7 | 143,827,134 | 147,595,540 | 2 | 1 | 3 | 0 |
| Case 59 | 7 | 147,595,929 | 147,643,746 | 1 | 1 | 2 | 0 |
| Case 59 | 7 | 147,643,987 | 148,790,849 | 2 | 1 | 3 | 0 |
| Case 59 | 7 | 148,796,253 | 148,921,610 | 1 | 1 | 2 | 0 |
| Case 59 | 7 | 148,922,666 | 149,513,141 | 2 | 1 | 3 | 0 |
| Case 59 | 7 | 149,513,152 | 149,576,587 | 1 | 1 | 2 | 0 |
| Case 59 | 7 | 149,576,629 | 150,709,904 | 2 | 1 | 3 | 0 |
| Case 59 | 7 | 150,710,817 | 150,815,696 | 1 | 1 | 2 | 0 |
| Case 59 | 7 | 150,817,155 | 151,859,495 | 2 | 1 | 3 | 0 |
| Case 59 | 7 | 151,859,569 | 151,879,501 | 1 | 1 | 2 | 0 |
| Case 59 | 7 | 151,880,153 | 153,654,045 | 2 | 1 | 3 | 0 |
| Case 59 | 7 | 153,670,448 | 153,914,346 | 1 | 1 | 2 | 0 |
| Case 59 | 7 | 153,925,428 | 154,620,262 | 2 | 1 | 3 | 0 |
| Case 59 | 7 | 154,621,545 | 154,684,153 | 1 | 1 | 2 | 0 |
| Case 59 | 7 | 154,684,971 | 159,119,486 | 2 | 1 | 3 | 0 |
| Case 59 | 8 | 164,984     | 577,101     | 2 | 1 | 3 | 0 |
| Case 59 | 8 | 578,742     | 612,758     | 1 | 1 | 2 | 0 |
| Case 59 | 8 | 613,620     | 3,906,703   | 2 | 1 | 3 | 0 |
| Case 59 | 8 | 3,906,969   | 3,947,046   | 1 | 1 | 2 | 0 |
| Case 59 | 8 | 3,947,325   | 5,495,306   | 2 | 1 | 3 | 0 |
| Case 59 | 8 | 5,495,468   | 5,528,849   | 1 | 1 | 2 | 0 |
| Case 59 | 8 | 5,529,622   | 6,032,731   | 2 | 1 | 3 | 0 |
| Case 59 | 8 | 6,033,116   | 6,084,755   | 1 | 1 | 2 | 0 |
| Case 59 | 8 | 6,086,549   | 9,269,676   | 2 | 1 | 3 | 0 |
| Case 59 | 8 | 9,271,136   | 9,314,784   | 1 | 1 | 2 | 0 |
| Case 59 | 8 | 9,315,518   | 9,692,541   | 2 | 1 | 3 | 0 |
| Case 59 | 8 | 9,692,825   | 9,794,093   | 1 | 1 | 2 | 0 |

|         |   |            |            |   |   |   |   |
|---------|---|------------|------------|---|---|---|---|
| Case 59 | 8 | 9,796,189  | 10,465,344 | 2 | 1 | 3 | 0 |
| Case 59 | 8 | 10,465,490 | 10,467,517 | 1 | 1 | 2 | 0 |
| Case 59 | 8 | 10,467,577 | 12,943,382 | 2 | 1 | 3 | 0 |
| Case 59 | 8 | 12,945,508 | 12,958,149 | 1 | 1 | 2 | 0 |
| Case 59 | 8 | 12,966,739 | 17,938,574 | 2 | 1 | 3 | 0 |
| Case 59 | 8 | 17,942,204 | 18,080,308 | 1 | 1 | 2 | 0 |
| Case 59 | 8 | 18,080,333 | 18,667,821 | 2 | 1 | 3 | 0 |
| Case 59 | 8 | 18,668,608 | 18,752,593 | 1 | 1 | 2 | 0 |
| Case 59 | 8 | 18,763,357 | 19,252,486 | 2 | 1 | 3 | 0 |
| Case 59 | 8 | 19,252,602 | 19,434,698 | 1 | 1 | 2 | 0 |
| Case 59 | 8 | 19,437,153 | 20,544,296 | 2 | 1 | 3 | 0 |
| Case 59 | 8 | 20,545,032 | 20,742,927 | 1 | 1 | 2 | 0 |
| Case 59 | 8 | 20,743,401 | 23,610,292 | 2 | 1 | 3 | 0 |
| Case 59 | 8 | 23,610,799 | 23,724,908 | 1 | 1 | 2 | 0 |
| Case 59 | 8 | 23,728,271 | 24,365,003 | 2 | 1 | 3 | 0 |
| Case 59 | 8 | 24,366,894 | 24,412,159 | 1 | 1 | 2 | 0 |
| Case 59 | 8 | 24,416,733 | 25,808,664 | 2 | 1 | 3 | 0 |
| Case 59 | 8 | 25,808,945 | 25,870,277 | 1 | 1 | 2 | 0 |
| Case 59 | 8 | 25,871,350 | 26,337,515 | 2 | 1 | 3 | 0 |
| Case 59 | 8 | 26,339,256 | 26,462,161 | 1 | 1 | 2 | 0 |
| Case 59 | 8 | 26,463,344 | 27,134,100 | 2 | 1 | 3 | 0 |
| Case 59 | 8 | 27,141,452 | 27,379,329 | 1 | 1 | 2 | 0 |
| Case 59 | 8 | 27,381,996 | 28,566,677 | 2 | 1 | 3 | 0 |
| Case 59 | 8 | 28,569,393 | 28,595,036 | 1 | 1 | 2 | 0 |
| Case 59 | 8 | 28,597,765 | 30,383,013 | 2 | 1 | 3 | 0 |
| Case 59 | 8 | 30,384,436 | 30,434,903 | 1 | 1 | 2 | 0 |
| Case 59 | 8 | 30,437,008 | 32,611,221 | 2 | 1 | 3 | 0 |
| Case 59 | 8 | 32,611,970 | 32,695,333 | 1 | 1 | 2 | 0 |
| Case 59 | 8 | 32,695,646 | 33,203,726 | 2 | 1 | 3 | 0 |
| Case 59 | 8 | 33,206,572 | 33,250,583 | 1 | 1 | 2 | 0 |
| Case 59 | 8 | 33,260,047 | 33,274,426 | 2 | 1 | 3 | 0 |
| Case 59 | 8 | 33,275,793 | 33,346,299 | 1 | 1 | 2 | 0 |
| Case 59 | 8 | 33,346,300 | 37,728,035 | 2 | 1 | 3 | 0 |
| Case 59 | 8 | 37,728,750 | 37,794,902 | 1 | 1 | 2 | 0 |
| Case 59 | 8 | 37,795,185 | 38,260,050 | 2 | 1 | 3 | 0 |
| Case 59 | 8 | 38,260,095 | 38,368,270 | 1 | 1 | 2 | 0 |
| Case 59 | 8 | 38,369,493 | 38,677,322 | 2 | 1 | 3 | 0 |
| Case 59 | 8 | 38,677,349 | 38,693,758 | 1 | 1 | 2 | 0 |
| Case 59 | 8 | 38,695,996 | 40,674,845 | 2 | 1 | 3 | 0 |
| Case 59 | 8 | 40,676,775 | 40,789,256 | 1 | 1 | 2 | 0 |
| Case 59 | 8 | 40,793,533 | 41,516,790 | 2 | 1 | 3 | 0 |
| Case 59 | 8 | 41,516,915 | 41,559,609 | 1 | 1 | 2 | 0 |
| Case 59 | 8 | 41,561,560 | 41,994,579 | 2 | 1 | 3 | 0 |
| Case 59 | 8 | 41,997,694 | 42,179,960 | 1 | 1 | 2 | 0 |
| Case 59 | 8 | 42,180,716 | 42,939,989 | 2 | 1 | 3 | 0 |
| Case 59 | 8 | 42,958,701 | 43,147,309 | 1 | 1 | 2 | 0 |
| Case 59 | 8 | 43,147,398 | 43,791,691 | 2 | 1 | 3 | 0 |
| Case 59 | 8 | 46,886,735 | 73,819,023 | 2 | 1 | 3 | 0 |
| Case 59 | 8 | 73,821,073 | 73,850,203 | 1 | 1 | 2 | 0 |
| Case 59 | 8 | 73,850,812 | 74,253,829 | 2 | 1 | 3 | 0 |
| Case 59 | 8 | 74,261,334 | 74,333,676 | 1 | 1 | 2 | 0 |
| Case 59 | 8 | 74,334,889 | 77,761,824 | 2 | 1 | 3 | 0 |
| Case 59 | 8 | 77,761,919 | 77,819,954 | 1 | 1 | 2 | 0 |
| Case 59 | 8 | 77,824,032 | 88,881,431 | 2 | 1 | 3 | 0 |
| Case 59 | 8 | 88,885,110 | 88,886,111 | 1 | 1 | 2 | 0 |
| Case 59 | 8 | 88,890,048 | 96,141,011 | 2 | 1 | 3 | 0 |
| Case 59 | 8 | 96,141,850 | 96,245,605 | 1 | 1 | 2 | 0 |
| Case 59 | 8 | 96,246,687 | 96,980,370 | 2 | 1 | 3 | 0 |
| Case 59 | 8 | 96,980,905 | 97,051,579 | 1 | 1 | 2 | 0 |
| Case 59 | 8 | 97,052,453 | 97,285,617 | 2 | 1 | 3 | 0 |
| Case 59 | 8 | 97,285,816 | 97,404,721 | 1 | 1 | 2 | 0 |

|         |    |             |             |   |   |   |   |
|---------|----|-------------|-------------|---|---|---|---|
| Case 59 | 8  | 97,408,966  | 99,392,416  | 2 | 1 | 3 | 0 |
| Case 59 | 8  | 99,396,652  | 99,452,962  | 1 | 1 | 2 | 0 |
| Case 59 | 8  | 99,455,311  | 100,848,480 | 2 | 1 | 3 | 0 |
| Case 59 | 8  | 100,850,010 | 100,926,037 | 1 | 1 | 2 | 0 |
| Case 59 | 8  | 100,970,952 | 102,654,182 | 2 | 1 | 3 | 0 |
| Case 59 | 8  | 102,660,160 | 102,751,489 | 1 | 1 | 2 | 0 |
| Case 59 | 8  | 102,756,851 | 103,720,185 | 2 | 1 | 3 | 0 |
| Case 59 | 8  | 103,724,898 | 103,755,301 | 1 | 1 | 2 | 0 |
| Case 59 | 8  | 103,769,678 | 106,812,527 | 2 | 1 | 3 | 0 |
| Case 59 | 8  | 106,813,325 | 106,853,152 | 1 | 1 | 2 | 0 |
| Case 59 | 8  | 106,853,639 | 107,773,278 | 2 | 1 | 3 | 0 |
| Case 59 | 8  | 107,773,280 | 107,782,411 | 1 | 1 | 2 | 0 |
| Case 59 | 8  | 107,789,571 | 110,585,288 | 2 | 1 | 3 | 0 |
| Case 59 | 8  | 110,586,134 | 110,592,151 | 1 | 1 | 2 | 0 |
| Case 59 | 8  | 110,594,148 | 116,599,199 | 2 | 1 | 3 | 0 |
| Case 59 | 8  | 116,599,271 | 116,740,823 | 1 | 1 | 2 | 0 |
| Case 59 | 8  | 116,746,477 | 123,816,210 | 2 | 1 | 3 | 0 |
| Case 59 | 8  | 123,817,194 | 123,858,679 | 1 | 1 | 2 | 0 |
| Case 59 | 8  | 123,864,916 | 123,964,035 | 2 | 1 | 3 | 0 |
| Case 59 | 8  | 123,964,081 | 123,966,062 | 1 | 1 | 2 | 0 |
| Case 59 | 8  | 123,966,085 | 124,547,004 | 2 | 1 | 3 | 0 |
| Case 59 | 8  | 124,551,708 | 124,647,861 | 1 | 1 | 2 | 0 |
| Case 59 | 8  | 124,648,032 | 125,563,769 | 2 | 1 | 3 | 0 |
| Case 59 | 8  | 125,565,328 | 125,575,182 | 1 | 1 | 2 | 0 |
| Case 59 | 8  | 125,575,619 | 126,361,680 | 2 | 1 | 3 | 0 |
| Case 59 | 8  | 126,365,542 | 126,490,972 | 1 | 1 | 2 | 0 |
| Case 59 | 8  | 126,493,746 | 133,917,904 | 2 | 1 | 3 | 0 |
| Case 59 | 8  | 133,918,769 | 133,975,056 | 1 | 1 | 2 | 0 |
| Case 59 | 8  | 133,975,256 | 135,513,186 | 2 | 1 | 3 | 0 |
| Case 59 | 8  | 135,516,280 | 135,650,071 | 1 | 1 | 2 | 0 |
| Case 59 | 8  | 135,654,340 | 140,924,076 | 2 | 1 | 3 | 0 |
| Case 59 | 8  | 140,925,766 | 141,015,327 | 1 | 1 | 2 | 0 |
| Case 59 | 8  | 141,015,586 | 146,293,414 | 2 | 1 | 3 | 0 |
| Case 59 | 9  | 46,587      | 9,793,342   | 1 | 1 | 2 | 0 |
| Case 59 | 9  | 9,796,116   | 9,805,193   | 2 | 1 | 3 | 0 |
| Case 59 | 9  | 9,805,496   | 17,404,464  | 1 | 1 | 2 | 0 |
| Case 59 | 9  | 17,409,391  | 17,464,622  | 2 | 1 | 3 | 0 |
| Case 59 | 9  | 17,466,468  | 26,978,157  | 1 | 1 | 2 | 0 |
| Case 59 | 9  | 26,978,170  | 27,011,917  | 2 | 1 | 3 | 0 |
| Case 59 | 9  | 27,017,017  | 46,944,322  | 1 | 1 | 2 | 0 |
| Case 59 | 9  | 65,629,772  | 79,824,002  | 1 | 1 | 2 | 0 |
| Case 59 | 9  | 79,824,351  | 80,017,018  | 2 | 1 | 3 | 0 |
| Case 59 | 9  | 80,018,236  | 111,701,959 | 1 | 1 | 2 | 0 |
| Case 59 | 9  | 111,703,561 | 111,739,304 | 2 | 1 | 3 | 0 |
| Case 59 | 9  | 111,741,679 | 114,464,733 | 1 | 1 | 2 | 0 |
| Case 59 | 9  | 114,468,966 | 114,542,761 | 2 | 1 | 3 | 0 |
| Case 59 | 9  | 114,545,878 | 123,785,740 | 1 | 1 | 2 | 0 |
| Case 59 | 9  | 123,787,743 | 123,812,513 | 2 | 1 | 3 | 0 |
| Case 59 | 9  | 123,817,613 | 141,066,491 | 1 | 1 | 2 | 0 |
| Case 59 | 10 | 98,087      | 22,171,224  | 2 | 0 | 2 | 1 |
| Case 59 | 10 | 22,193,497  | 22,336,151  | 3 | 0 | 3 | 1 |
| Case 59 | 10 | 22,358,148  | 26,381,812  | 2 | 0 | 2 | 1 |
| Case 59 | 10 | 26,385,390  | 26,419,885  | 3 | 0 | 3 | 1 |
| Case 59 | 10 | 26,422,301  | 32,740,722  | 2 | 0 | 2 | 1 |
| Case 59 | 10 | 32,742,291  | 32,780,902  | 3 | 0 | 3 | 1 |
| Case 59 | 10 | 32,798,947  | 33,103,364  | 2 | 0 | 2 | 1 |
| Case 59 | 10 | 33,113,448  | 33,137,574  | 3 | 0 | 3 | 1 |
| Case 59 | 10 | 33,143,396  | 39,097,912  | 2 | 0 | 2 | 1 |
| Case 59 | 10 | 42,436,301  | 75,896,523  | 2 | 0 | 2 | 1 |
| Case 59 | 10 | 75,900,462  | 76,373,904  | 3 | 0 | 3 | 1 |
| Case 59 | 10 | 76,400,262  | 90,341,974  | 2 | 0 | 2 | 1 |



|         |    |             |             |   |   |   |   |
|---------|----|-------------|-------------|---|---|---|---|
| Case 59 | 10 | 90,342,837  | 90,356,670  | 3 | 0 | 3 | 1 |
| Case 59 | 10 | 90,358,138  | 91,465,167  | 2 | 0 | 2 | 1 |
| Case 59 | 10 | 91,468,925  | 91,520,368  | 3 | 0 | 3 | 1 |
| Case 59 | 10 | 91,522,548  | 93,176,418  | 2 | 0 | 2 | 1 |
| Case 59 | 10 | 93,177,933  | 93,276,500  | 3 | 0 | 3 | 1 |
| Case 59 | 10 | 93,278,961  | 95,427,281  | 2 | 0 | 2 | 1 |
| Case 59 | 10 | 95,429,007  | 95,459,817  | 3 | 0 | 3 | 1 |
| Case 59 | 10 | 95,467,031  | 117,183,215 | 2 | 0 | 2 | 1 |
| Case 59 | 10 | 117,184,682 | 117,267,610 | 3 | 0 | 3 | 1 |
| Case 59 | 10 | 117,268,000 | 135,477,883 | 2 | 0 | 2 | 1 |
| Case 59 | 11 | 193,146     | 32,632,749  | 1 | 1 | 2 | 0 |
| Case 59 | 11 | 32,635,078  | 32,637,615  | 2 | 1 | 3 | 0 |
| Case 59 | 11 | 32,639,192  | 49,079,350  | 1 | 1 | 2 | 0 |
| Case 59 | 11 | 49,093,987  | 50,468,978  | 2 | 0 | 2 | 1 |
| Case 59 | 11 | 50,476,268  | 51,372,036  | 1 | 0 | 1 | 0 |
| Case 59 | 11 | 51,379,204  | 51,591,253  | 1 | 1 | 2 | 0 |
| Case 59 | 11 | 54,794,237  | 92,868,270  | 1 | 1 | 2 | 0 |
| Case 59 | 11 | 92,881,044  | 92,914,897  | 2 | 1 | 3 | 0 |
| Case 59 | 11 | 92,915,544  | 102,992,224 | 1 | 1 | 2 | 0 |
| Case 59 | 11 | 102,995,941 | 103,153,758 | 2 | 1 | 3 | 0 |
| Case 59 | 11 | 103,156,806 | 108,092,637 | 1 | 1 | 2 | 0 |
| Case 59 | 11 | 108,097,333 | 108,168,053 | 2 | 1 | 3 | 0 |
| Case 59 | 11 | 108,169,323 | 134,934,063 | 1 | 1 | 2 | 0 |
| Case 59 | 12 | 191,619     | 21,199,481  | 1 | 1 | 2 | 0 |
| Case 59 | 12 | 21,200,019  | 21,278,192  | 2 | 1 | 3 | 0 |
| Case 59 | 12 | 21,279,287  | 34,853,011  | 1 | 1 | 2 | 0 |
| Case 59 | 12 | 37,876,400  | 72,278,705  | 1 | 1 | 2 | 0 |
| Case 59 | 12 | 72,286,116  | 72,317,808  | 2 | 1 | 3 | 0 |
| Case 59 | 12 | 72,323,834  | 85,407,131  | 1 | 1 | 2 | 0 |
| Case 59 | 12 | 85,411,290  | 85,439,820  | 2 | 1 | 3 | 0 |
| Case 59 | 12 | 85,441,102  | 88,453,072  | 1 | 1 | 2 | 0 |
| Case 59 | 12 | 88,453,608  | 88,582,702  | 2 | 1 | 3 | 0 |
| Case 59 | 12 | 88,584,312  | 93,151,045  | 1 | 1 | 2 | 0 |
| Case 59 | 12 | 93,155,535  | 93,226,288  | 2 | 1 | 3 | 0 |
| Case 59 | 12 | 93,226,290  | 105,501,598 | 1 | 1 | 2 | 0 |
| Case 59 | 12 | 105,505,004 | 105,538,532 | 2 | 1 | 3 | 0 |
| Case 59 | 12 | 105,540,875 | 123,027,814 | 1 | 1 | 2 | 0 |
| Case 59 | 12 | 123,028,739 | 123,064,182 | 2 | 1 | 3 | 0 |
| Case 59 | 12 | 123,067,303 | 133,810,935 | 1 | 1 | 2 | 0 |
| Case 59 | 13 | 19,058,717  | 48,886,282  | 1 | 1 | 2 | 0 |
| Case 59 | 13 | 48,902,121  | 48,939,420  | 2 | 1 | 3 | 0 |
| Case 59 | 13 | 48,945,175  | 79,854,198  | 1 | 1 | 2 | 0 |
| Case 59 | 13 | 79,856,806  | 79,940,211  | 2 | 1 | 3 | 0 |
| Case 59 | 13 | 79,940,529  | 96,508,566  | 1 | 1 | 2 | 0 |
| Case 59 | 13 | 96,508,567  | 96,530,055  | 2 | 1 | 3 | 0 |
| Case 59 | 13 | 96,534,639  | 115,103,529 | 1 | 1 | 2 | 0 |
| Case 59 | 14 | 19,280,733  | 22,749,742  | 1 | 1 | 2 | 0 |
| Case 59 | 14 | 22,752,873  | 22,844,970  | 2 | 1 | 3 | 0 |
| Case 59 | 14 | 22,851,273  | 55,458,040  | 1 | 1 | 2 | 0 |
| Case 59 | 14 | 55,462,356  | 55,475,038  | 2 | 1 | 3 | 0 |
| Case 59 | 14 | 55,493,350  | 56,106,211  | 1 | 1 | 2 | 0 |
| Case 59 | 14 | 56,106,666  | 56,137,504  | 2 | 1 | 3 | 0 |
| Case 59 | 14 | 56,139,686  | 58,895,164  | 1 | 1 | 2 | 0 |
| Case 59 | 14 | 58,896,083  | 58,947,365  | 2 | 1 | 3 | 0 |
| Case 59 | 14 | 58,949,289  | 60,902,520  | 1 | 1 | 2 | 0 |
| Case 59 | 14 | 60,903,572  | 60,945,298  | 2 | 1 | 3 | 0 |
| Case 59 | 14 | 60,950,466  | 92,432,308  | 1 | 1 | 2 | 0 |
| Case 59 | 14 | 92,434,957  | 92,454,649  | 2 | 1 | 3 | 0 |
| Case 59 | 14 | 92,454,691  | 96,782,965  | 1 | 1 | 2 | 0 |
| Case 59 | 14 | 96,784,037  | 96,811,065  | 2 | 1 | 3 | 0 |
| Case 59 | 14 | 96,813,521  | 107,287,663 | 1 | 1 | 2 | 0 |

|         |    |             |             |   |   |   |   |
|---------|----|-------------|-------------|---|---|---|---|
| Case 59 | 15 | 20,034,919  | 52,885,874  | 1 | 1 | 2 | 0 |
| Case 59 | 15 | 52,892,034  | 52,901,638  | 2 | 1 | 3 | 0 |
| Case 59 | 15 | 52,901,652  | 62,232,850  | 1 | 1 | 2 | 0 |
| Case 59 | 15 | 62,232,925  | 62,244,117  | 2 | 1 | 3 | 0 |
| Case 59 | 15 | 62,246,670  | 62,256,948  | 1 | 1 | 2 | 0 |
| Case 59 | 15 | 62,258,287  | 62,340,126  | 2 | 1 | 3 | 0 |
| Case 59 | 15 | 62,358,682  | 102,461,162 | 1 | 1 | 2 | 0 |
| Case 59 | 16 | 88,165      | 1,885,632   | 1 | 1 | 2 | 0 |
| Case 59 | 16 | 1,886,233   | 1,934,183   | 2 | 1 | 3 | 0 |
| Case 59 | 16 | 1,943,418   | 2,653,657   | 1 | 1 | 2 | 0 |
| Case 59 | 16 | 2,699,304   | 2,743,418   | 2 | 1 | 3 | 0 |
| Case 59 | 16 | 2,747,857   | 35,285,582  | 1 | 1 | 2 | 0 |
| Case 59 | 16 | 46,450,037  | 55,793,837  | 1 | 1 | 2 | 0 |
| Case 59 | 16 | 55,843,252  | 55,850,708  | 2 | 1 | 3 | 0 |
| Case 59 | 16 | 55,850,977  | 90,274,695  | 1 | 1 | 2 | 0 |
| Case 59 | 17 | 11,885      | 3,343,406   | 2 | 0 | 2 | 1 |
| Case 59 | 17 | 3,343,534   | 3,372,179   | 3 | 0 | 3 | 1 |
| Case 59 | 17 | 3,376,188   | 17,432,098  | 2 | 0 | 2 | 1 |
| Case 59 | 17 | 17,433,959  | 22,242,355  | 1 | 1 | 2 | 0 |
| Case 59 | 17 | 25,268,142  | 27,185,772  | 1 | 1 | 2 | 0 |
| Case 59 | 17 | 27,185,833  | 45,412,575  | 2 | 0 | 2 | 1 |
| Case 59 | 17 | 45,412,629  | 45,492,231  | 3 | 0 | 3 | 1 |
| Case 59 | 17 | 45,492,254  | 67,249,997  | 2 | 0 | 2 | 1 |
| Case 59 | 17 | 67,250,466  | 67,309,271  | 3 | 0 | 3 | 1 |
| Case 59 | 17 | 67,310,516  | 81,060,040  | 2 | 0 | 2 | 1 |
| Case 59 | 18 | 87,505      | 15,375,878  | 1 | 1 | 2 | 0 |
| Case 59 | 18 | 18,520,354  | 30,771,795  | 1 | 1 | 2 | 0 |
| Case 59 | 18 | 30,778,086  | 30,929,223  | 2 | 1 | 3 | 0 |
| Case 59 | 18 | 30,941,974  | 76,856,565  | 1 | 1 | 2 | 0 |
| Case 59 | 18 | 76,856,583  | 76,886,325  | 2 | 1 | 3 | 0 |
| Case 59 | 18 | 76,900,411  | 78,015,180  | 1 | 1 | 2 | 0 |
| Case 59 | 19 | 260,912     | 24,629,285  | 1 | 1 | 2 | 0 |
| Case 59 | 19 | 27,732,159  | 59,097,160  | 1 | 1 | 2 | 0 |
| Case 59 | 20 | 63,244      | 26,293,985  | 1 | 1 | 2 | 0 |
| Case 59 | 20 | 29,425,357  | 55,906,923  | 1 | 1 | 2 | 0 |
| Case 59 | 20 | 55,908,269  | 55,910,508  | 2 | 1 | 3 | 0 |
| Case 59 | 20 | 55,910,863  | 58,436,963  | 1 | 1 | 2 | 0 |
| Case 59 | 20 | 58,440,630  | 58,500,453  | 2 | 1 | 3 | 0 |
| Case 59 | 20 | 58,502,456  | 62,194,128  | 1 | 1 | 2 | 0 |
| Case 59 | 20 | 62,194,200  | 62,198,578  | 2 | 1 | 3 | 0 |
| Case 59 | 20 | 62,198,808  | 62,948,788  | 1 | 1 | 2 | 0 |
| Case 59 | 21 | 10,827,533  | 10,971,337  | 1 | 1 | 2 | 0 |
| Case 59 | 21 | 14,368,320  | 48,100,155  | 1 | 1 | 2 | 0 |
| Case 59 | 22 | 16,114,244  | 51,195,728  | 1 | 1 | 2 | 0 |
| Case 61 | 1  | 82,154      | 12,919,081  | 1 | 1 | 2 | 0 |
| Case 61 | 1  | 12,919,838  | 12,961,019  | 0 | 0 | 0 | 0 |
| Case 61 | 1  | 13,176,463  | 121,346,616 | 1 | 1 | 2 | 0 |
| Case 61 | 1  | 142,649,718 | 174,794,144 | 1 | 1 | 2 | 0 |
| Case 61 | 1  | 174,797,867 | 174,818,547 | 0 | 0 | 0 | 0 |
| Case 61 | 1  | 174,821,623 | 230,668,250 | 1 | 1 | 2 | 0 |
| Case 61 | 1  | 230,668,260 | 230,735,580 | 1 | 0 | 1 | 0 |
| Case 61 | 1  | 230,745,894 | 249,218,992 | 1 | 1 | 2 | 0 |
| Case 61 | 2  | 18,674      | 92,081,640  | 1 | 1 | 2 | 0 |
| Case 61 | 2  | 95,429,424  | 180,287,156 | 1 | 1 | 2 | 0 |
| Case 61 | 2  | 180,289,739 | 180,298,424 | 0 | 0 | 0 | 0 |
| Case 61 | 2  | 180,303,862 | 243,048,760 | 1 | 1 | 2 | 0 |
| Case 61 | 3  | 61,495      | 1,673,173   | 1 | 1 | 2 | 0 |
| Case 61 | 3  | 1,674,210   | 1,704,667   | 0 | 0 | 0 | 0 |
| Case 61 | 3  | 1,706,412   | 60,410,706  | 1 | 1 | 2 | 0 |
| Case 61 | 3  | 60,412,102  | 60,492,136  | 1 | 0 | 1 | 0 |
| Case 61 | 3  | 60,496,077  | 60,536,420  | 1 | 1 | 2 | 0 |

|         |   |             |             |   |   |   |   |
|---------|---|-------------|-------------|---|---|---|---|
| Case 61 | 3 | 60,540,665  | 60,546,856  | 2 | 0 | 2 | 1 |
| Case 61 | 3 | 60,547,602  | 61,052,481  | 1 | 1 | 2 | 0 |
| Case 61 | 3 | 61,054,494  | 61,139,748  | 2 | 0 | 2 | 1 |
| Case 61 | 3 | 61,141,434  | 61,190,420  | 0 | 0 | 0 | 0 |
| Case 61 | 3 | 61,205,741  | 90,442,925  | 1 | 1 | 2 | 0 |
| Case 61 | 3 | 93,537,290  | 197,838,262 | 1 | 1 | 2 | 0 |
| Case 61 | 4 | 71,566      | 9,371,116   | 1 | 1 | 2 | 0 |
| Case 61 | 4 | 9,376,566   | 9,485,300   | 3 | 1 | 4 | 0 |
| Case 61 | 4 | 9,509,791   | 49,620,898  | 1 | 1 | 2 | 0 |
| Case 61 | 4 | 52,697,856  | 92,477,566  | 1 | 1 | 2 | 0 |
| Case 61 | 4 | 92,483,806  | 92,770,887  | 3 | 1 | 4 | 0 |
| Case 61 | 4 | 92,790,543  | 122,281,107 | 1 | 1 | 2 | 0 |
| Case 61 | 4 | 122,285,263 | 122,288,645 | 0 | 0 | 0 | 0 |
| Case 61 | 4 | 122,289,863 | 190,963,766 | 1 | 1 | 2 | 0 |
| Case 61 | 5 | 38,139      | 46,399,093  | 1 | 1 | 2 | 0 |
| Case 61 | 5 | 49,457,282  | 139,931,384 | 1 | 1 | 2 | 0 |
| Case 61 | 5 | 139,931,607 | 139,931,740 | 0 | 0 | 0 | 0 |
| Case 61 | 5 | 139,936,760 | 180,693,127 | 1 | 1 | 2 | 0 |
| Case 61 | 6 | 108,666     | 58,752,089  | 1 | 1 | 2 | 0 |
| Case 61 | 6 | 61,891,118  | 170,980,171 | 1 | 1 | 2 | 0 |
| Case 61 | 7 | 44,935      | 6,859,544   | 2 | 1 | 3 | 0 |
| Case 61 | 7 | 6,870,635   | 7,313,044   | 3 | 1 | 4 | 0 |
| Case 61 | 7 | 7,313,151   | 7,313,151   | 1 | 1 | 2 | 0 |
| Case 61 | 7 | 7,313,294   | 7,795,407   | 2 | 1 | 3 | 0 |
| Case 61 | 7 | 7,795,531   | 7,996,282   | 3 | 1 | 4 | 0 |
| Case 61 | 7 | 8,000,032   | 8,000,032   | 1 | 1 | 2 | 0 |
| Case 61 | 7 | 8,000,971   | 8,736,299   | 2 | 1 | 3 | 0 |
| Case 61 | 7 | 8,737,023   | 11,534,319  | 3 | 1 | 4 | 0 |
| Case 61 | 7 | 11,535,903  | 11,615,654  | 2 | 1 | 3 | 0 |
| Case 61 | 7 | 11,616,177  | 16,366,339  | 3 | 1 | 4 | 0 |
| Case 61 | 7 | 16,366,674  | 16,370,188  | 1 | 1 | 2 | 0 |
| Case 61 | 7 | 16,375,281  | 16,654,334  | 2 | 1 | 3 | 0 |
| Case 61 | 7 | 16,655,387  | 20,560,996  | 3 | 1 | 4 | 0 |
| Case 61 | 7 | 20,572,445  | 20,725,455  | 2 | 1 | 3 | 0 |
| Case 61 | 7 | 20,725,461  | 20,754,975  | 2 | 2 | 4 | 0 |
| Case 61 | 7 | 20,761,221  | 21,326,835  | 2 | 1 | 3 | 0 |
| Case 61 | 7 | 21,327,064  | 21,600,738  | 3 | 1 | 4 | 0 |
| Case 61 | 7 | 21,603,534  | 26,553,272  | 2 | 1 | 3 | 0 |
| Case 61 | 7 | 26,557,421  | 27,121,456  | 3 | 1 | 4 | 0 |
| Case 61 | 7 | 27,130,276  | 27,132,969  | 1 | 1 | 2 | 0 |
| Case 61 | 7 | 27,134,966  | 27,805,569  | 2 | 1 | 3 | 0 |
| Case 61 | 7 | 27,813,630  | 28,128,410  | 3 | 1 | 4 | 0 |
| Case 61 | 7 | 28,131,416  | 28,133,980  | 1 | 1 | 2 | 0 |
| Case 61 | 7 | 28,138,193  | 31,213,647  | 2 | 1 | 3 | 0 |
| Case 61 | 7 | 31,228,648  | 31,411,765  | 3 | 1 | 4 | 0 |
| Case 61 | 7 | 31,412,771  | 38,067,723  | 2 | 1 | 3 | 0 |
| Case 61 | 7 | 38,077,008  | 38,383,243  | 3 | 1 | 4 | 0 |
| Case 61 | 7 | 38,385,938  | 38,413,859  | 1 | 1 | 2 | 0 |
| Case 61 | 7 | 38,417,556  | 46,642,993  | 2 | 1 | 3 | 0 |
| Case 61 | 7 | 46,646,441  | 47,079,999  | 3 | 1 | 4 | 0 |
| Case 61 | 7 | 47,081,588  | 47,088,439  | 1 | 1 | 2 | 0 |
| Case 61 | 7 | 47,091,670  | 48,311,485  | 2 | 1 | 3 | 0 |
| Case 61 | 7 | 48,311,563  | 48,318,533  | 2 | 2 | 4 | 0 |
| Case 61 | 7 | 48,318,613  | 53,787,288  | 2 | 1 | 3 | 0 |
| Case 61 | 7 | 53,789,410  | 54,467,507  | 3 | 1 | 4 | 0 |
| Case 61 | 7 | 54,491,582  | 57,361,122  | 2 | 1 | 3 | 0 |
| Case 61 | 7 | 57,367,613  | 58,019,061  | 3 | 1 | 4 | 0 |
| Case 61 | 7 | 61,056,053  | 65,424,658  | 3 | 1 | 4 | 0 |
| Case 61 | 7 | 65,425,894  | 77,098,772  | 2 | 1 | 3 | 0 |
| Case 61 | 7 | 77,101,532  | 82,516,932  | 3 | 1 | 4 | 0 |
| Case 61 | 7 | 82,518,391  | 82,784,186  | 2 | 1 | 3 | 0 |

|         |   |             |             |   |   |   |   |
|---------|---|-------------|-------------|---|---|---|---|
| Case 61 | 7 | 82,784,287  | 82,785,182  | 1 | 1 | 2 | 0 |
| Case 61 | 7 | 82,785,271  | 86,802,008  | 3 | 1 | 4 | 0 |
| Case 61 | 7 | 86,817,448  | 86,817,448  | 1 | 1 | 2 | 0 |
| Case 61 | 7 | 86,817,456  | 87,695,787  | 2 | 1 | 3 | 0 |
| Case 61 | 7 | 87,699,736  | 88,956,699  | 3 | 1 | 4 | 0 |
| Case 61 | 7 | 88,962,700  | 88,962,831  | 1 | 1 | 2 | 0 |
| Case 61 | 7 | 88,962,973  | 89,338,551  | 2 | 1 | 3 | 0 |
| Case 61 | 7 | 89,340,308  | 90,639,136  | 3 | 1 | 4 | 0 |
| Case 61 | 7 | 90,647,165  | 90,656,040  | 1 | 1 | 2 | 0 |
| Case 61 | 7 | 90,660,299  | 91,033,639  | 2 | 1 | 3 | 0 |
| Case 61 | 7 | 91,033,751  | 92,760,773  | 3 | 1 | 4 | 0 |
| Case 61 | 7 | 92,760,823  | 92,761,203  | 1 | 1 | 2 | 0 |
| Case 61 | 7 | 92,761,875  | 92,991,879  | 2 | 1 | 3 | 0 |
| Case 61 | 7 | 92,995,110  | 93,352,716  | 3 | 1 | 4 | 0 |
| Case 61 | 7 | 93,353,042  | 93,358,149  | 1 | 1 | 2 | 0 |
| Case 61 | 7 | 93,361,351  | 94,685,143  | 2 | 1 | 3 | 0 |
| Case 61 | 7 | 94,693,970  | 95,078,175  | 3 | 1 | 4 | 0 |
| Case 61 | 7 | 95,078,296  | 95,078,296  | 1 | 1 | 2 | 0 |
| Case 61 | 7 | 95,078,950  | 95,853,837  | 2 | 1 | 3 | 0 |
| Case 61 | 7 | 95,864,108  | 96,167,634  | 3 | 1 | 4 | 0 |
| Case 61 | 7 | 96,168,217  | 96,170,054  | 1 | 1 | 2 | 0 |
| Case 61 | 7 | 96,173,019  | 96,650,226  | 2 | 1 | 3 | 0 |
| Case 61 | 7 | 96,651,406  | 96,661,390  | 1 | 1 | 2 | 0 |
| Case 61 | 7 | 96,674,424  | 97,403,141  | 3 | 1 | 4 | 0 |
| Case 61 | 7 | 97,404,277  | 97,404,380  | 1 | 1 | 2 | 0 |
| Case 61 | 7 | 97,406,045  | 103,214,713 | 2 | 1 | 3 | 0 |
| Case 61 | 7 | 103,217,219 | 104,430,056 | 3 | 1 | 4 | 0 |
| Case 61 | 7 | 104,435,213 | 106,407,117 | 2 | 1 | 3 | 0 |
| Case 61 | 7 | 106,409,897 | 107,545,799 | 3 | 1 | 4 | 0 |
| Case 61 | 7 | 107,545,837 | 108,043,038 | 2 | 1 | 3 | 0 |
| Case 61 | 7 | 108,043,641 | 111,149,671 | 3 | 1 | 4 | 0 |
| Case 61 | 7 | 111,151,253 | 111,166,165 | 1 | 1 | 2 | 0 |
| Case 61 | 7 | 111,180,544 | 113,020,044 | 2 | 1 | 3 | 0 |
| Case 61 | 7 | 113,029,219 | 113,963,334 | 3 | 1 | 4 | 0 |
| Case 61 | 7 | 113,973,098 | 113,993,281 | 1 | 1 | 2 | 0 |
| Case 61 | 7 | 113,997,624 | 114,551,039 | 2 | 1 | 3 | 0 |
| Case 61 | 7 | 114,560,827 | 117,368,227 | 3 | 1 | 4 | 0 |
| Case 61 | 7 | 117,368,252 | 117,994,519 | 2 | 1 | 3 | 0 |
| Case 61 | 7 | 118,006,251 | 122,048,354 | 3 | 1 | 4 | 0 |
| Case 61 | 7 | 122,052,524 | 122,052,524 | 1 | 1 | 2 | 0 |
| Case 61 | 7 | 122,056,213 | 122,843,053 | 2 | 1 | 3 | 0 |
| Case 61 | 7 | 122,845,289 | 123,296,193 | 3 | 1 | 4 | 0 |
| Case 61 | 7 | 123,296,320 | 123,305,444 | 1 | 1 | 2 | 0 |
| Case 61 | 7 | 123,312,847 | 125,278,996 | 3 | 1 | 4 | 0 |
| Case 61 | 7 | 125,284,039 | 125,284,039 | 1 | 1 | 2 | 0 |
| Case 61 | 7 | 125,286,791 | 125,848,263 | 2 | 1 | 3 | 0 |
| Case 61 | 7 | 125,853,688 | 126,437,897 | 3 | 1 | 4 | 0 |
| Case 61 | 7 | 126,439,383 | 126,439,383 | 1 | 1 | 2 | 0 |
| Case 61 | 7 | 126,447,564 | 133,638,952 | 2 | 1 | 3 | 0 |
| Case 61 | 7 | 133,643,848 | 134,022,714 | 3 | 1 | 4 | 0 |
| Case 61 | 7 | 134,025,825 | 134,025,825 | 1 | 1 | 2 | 0 |
| Case 61 | 7 | 134,026,821 | 139,757,802 | 2 | 1 | 3 | 0 |
| Case 61 | 7 | 139,763,994 | 140,106,504 | 3 | 1 | 4 | 0 |
| Case 61 | 7 | 140,107,136 | 140,111,722 | 1 | 1 | 2 | 0 |
| Case 61 | 7 | 140,111,730 | 144,253,833 | 2 | 1 | 3 | 0 |
| Case 61 | 7 | 144,267,846 | 145,812,354 | 3 | 1 | 4 | 0 |
| Case 61 | 7 | 145,813,854 | 145,813,854 | 1 | 1 | 2 | 0 |
| Case 61 | 7 | 145,825,216 | 147,022,896 | 2 | 1 | 3 | 0 |
| Case 61 | 7 | 147,023,537 | 147,803,861 | 3 | 1 | 4 | 0 |
| Case 61 | 7 | 147,805,486 | 147,810,841 | 1 | 1 | 2 | 0 |
| Case 61 | 7 | 147,812,192 | 159,119,486 | 2 | 1 | 3 | 0 |

|         |    |             |             |   |   |   |   |
|---------|----|-------------|-------------|---|---|---|---|
| Case 61 | 8  | 164,984     | 1,110,914   | 2 | 2 | 4 | 0 |
| Case 61 | 8  | 1,111,158   | 1,164,482   | 2 | 1 | 3 | 0 |
| Case 61 | 8  | 1,165,148   | 1,243,574   | 2 | 2 | 4 | 0 |
| Case 61 | 8  | 1,244,374   | 1,370,352   | 2 | 1 | 3 | 0 |
| Case 61 | 8  | 1,372,223   | 10,148,197  | 2 | 2 | 4 | 0 |
| Case 61 | 8  | 10,149,567  | 10,294,330  | 2 | 1 | 3 | 0 |
| Case 61 | 8  | 10,295,378  | 10,436,353  | 2 | 2 | 4 | 0 |
| Case 61 | 8  | 10,437,868  | 10,468,039  | 2 | 1 | 3 | 0 |
| Case 61 | 8  | 10,468,172  | 10,474,055  | 2 | 2 | 4 | 0 |
| Case 61 | 8  | 10,480,101  | 10,535,377  | 2 | 1 | 3 | 0 |
| Case 61 | 8  | 10,535,826  | 11,683,630  | 2 | 2 | 4 | 0 |
| Case 61 | 8  | 11,683,653  | 11,710,887  | 2 | 1 | 3 | 0 |
| Case 61 | 8  | 11,710,888  | 19,156,100  | 2 | 2 | 4 | 0 |
| Case 61 | 8  | 19,156,367  | 19,364,515  | 2 | 1 | 3 | 0 |
| Case 61 | 8  | 19,371,767  | 19,985,382  | 2 | 2 | 4 | 0 |
| Case 61 | 8  | 19,987,703  | 20,038,447  | 2 | 1 | 3 | 0 |
| Case 61 | 8  | 20,038,466  | 21,994,951  | 2 | 2 | 4 | 0 |
| Case 61 | 8  | 21,995,097  | 22,011,662  | 2 | 1 | 3 | 0 |
| Case 61 | 8  | 22,011,721  | 22,426,701  | 2 | 2 | 4 | 0 |
| Case 61 | 8  | 22,428,529  | 22,567,354  | 2 | 1 | 3 | 0 |
| Case 61 | 8  | 22,567,769  | 24,771,275  | 2 | 2 | 4 | 0 |
| Case 61 | 8  | 24,771,326  | 24,813,391  | 2 | 1 | 3 | 0 |
| Case 61 | 8  | 24,813,446  | 26,426,579  | 2 | 2 | 4 | 0 |
| Case 61 | 8  | 26,431,466  | 26,585,268  | 2 | 1 | 3 | 0 |
| Case 61 | 8  | 26,588,975  | 27,134,100  | 2 | 2 | 4 | 0 |
| Case 61 | 8  | 27,141,452  | 27,289,792  | 2 | 1 | 3 | 0 |
| Case 61 | 8  | 27,291,039  | 27,369,366  | 2 | 2 | 4 | 0 |
| Case 61 | 8  | 27,371,116  | 27,404,354  | 2 | 1 | 3 | 0 |
| Case 61 | 8  | 27,405,207  | 38,268,023  | 2 | 2 | 4 | 0 |
| Case 61 | 8  | 38,269,514  | 38,363,472  | 2 | 1 | 3 | 0 |
| Case 61 | 8  | 38,368,270  | 43,791,691  | 2 | 2 | 4 | 0 |
| Case 61 | 8  | 46,886,735  | 77,762,439  | 2 | 2 | 4 | 0 |
| Case 61 | 8  | 77,763,248  | 77,796,116  | 2 | 1 | 3 | 0 |
| Case 61 | 8  | 77,796,946  | 123,961,799 | 2 | 2 | 4 | 0 |
| Case 61 | 8  | 123,963,776 | 123,969,205 | 2 | 1 | 3 | 0 |
| Case 61 | 8  | 123,971,081 | 133,902,602 | 2 | 2 | 4 | 0 |
| Case 61 | 8  | 133,904,380 | 133,958,037 | 2 | 1 | 3 | 0 |
| Case 61 | 8  | 133,959,518 | 134,093,274 | 2 | 2 | 4 | 0 |
| Case 61 | 8  | 134,094,976 | 134,151,757 | 2 | 1 | 3 | 0 |
| Case 61 | 8  | 134,152,994 | 134,993,530 | 2 | 2 | 4 | 0 |
| Case 61 | 8  | 134,999,918 | 135,065,947 | 2 | 1 | 3 | 0 |
| Case 61 | 8  | 135,068,340 | 139,770,716 | 2 | 2 | 4 | 0 |
| Case 61 | 8  | 139,774,092 | 139,904,247 | 2 | 1 | 3 | 0 |
| Case 61 | 8  | 139,906,088 | 142,222,331 | 2 | 2 | 4 | 0 |
| Case 61 | 8  | 142,222,445 | 142,245,464 | 2 | 1 | 3 | 0 |
| Case 61 | 8  | 142,246,550 | 144,330,452 | 2 | 2 | 4 | 0 |
| Case 61 | 8  | 144,332,084 | 144,446,285 | 2 | 1 | 3 | 0 |
| Case 61 | 8  | 144,449,191 | 144,920,853 | 2 | 2 | 4 | 0 |
| Case 61 | 8  | 144,920,886 | 144,942,718 | 2 | 1 | 3 | 0 |
| Case 61 | 8  | 144,942,796 | 146,293,414 | 2 | 2 | 4 | 0 |
| Case 61 | 9  | 46,587      | 46,944,322  | 1 | 1 | 2 | 0 |
| Case 61 | 9  | 65,629,772  | 141,066,491 | 1 | 1 | 2 | 0 |
| Case 61 | 10 | 98,087      | 39,097,912  | 1 | 1 | 2 | 0 |
| Case 61 | 10 | 42,436,301  | 135,477,883 | 1 | 1 | 2 | 0 |
| Case 61 | 11 | 193,146     | 26,986,106  | 1 | 1 | 2 | 0 |
| Case 61 | 11 | 27,007,293  | 27,236,316  | 3 | 1 | 4 | 0 |
| Case 61 | 11 | 27,239,845  | 51,591,253  | 1 | 1 | 2 | 0 |
| Case 61 | 11 | 54,794,237  | 57,480,232  | 1 | 1 | 2 | 0 |
| Case 61 | 11 | 57,488,160  | 58,057,129  | 1 | 0 | 1 | 0 |
| Case 61 | 11 | 58,059,421  | 58,086,755  | 0 | 0 | 0 | 0 |
| Case 61 | 11 | 58,090,384  | 58,116,532  | 2 | 0 | 2 | 1 |

|         |    |             |             |   |   |   |   |
|---------|----|-------------|-------------|---|---|---|---|
| Case 61 | 11 | 58,125,600  | 58,126,493  | 0 | 0 | 0 | 0 |
| Case 61 | 11 | 58,127,643  | 58,170,469  | 2 | 0 | 2 | 1 |
| Case 61 | 11 | 58,170,712  | 58,605,832  | 1 | 0 | 1 | 0 |
| Case 61 | 11 | 58,610,656  | 58,715,285  | 0 | 0 | 0 | 0 |
| Case 61 | 11 | 58,722,734  | 58,846,985  | 1 | 0 | 1 | 0 |
| Case 61 | 11 | 58,863,775  | 134,934,063 | 1 | 1 | 2 | 0 |
| Case 61 | 12 | 191,619     | 33,293,907  | 1 | 1 | 2 | 0 |
| Case 61 | 12 | 33,302,438  | 33,305,855  | 0 | 0 | 0 | 0 |
| Case 61 | 12 | 33,308,928  | 34,853,011  | 1 | 1 | 2 | 0 |
| Case 61 | 12 | 37,876,400  | 40,873,251  | 1 | 1 | 2 | 0 |
| Case 61 | 12 | 40,875,351  | 40,875,963  | 0 | 0 | 0 | 0 |
| Case 61 | 12 | 40,893,165  | 61,556,873  | 1 | 1 | 2 | 0 |
| Case 61 | 12 | 61,563,799  | 61,604,963  | 3 | 1 | 4 | 0 |
| Case 61 | 12 | 61,606,297  | 133,810,935 | 1 | 1 | 2 | 0 |
| Case 61 | 13 | 19,058,717  | 115,103,529 | 2 | 1 | 3 | 0 |
| Case 61 | 14 | 19,280,733  | 22,586,162  | 1 | 1 | 2 | 0 |
| Case 61 | 14 | 22,586,392  | 22,700,951  | 2 | 1 | 3 | 0 |
| Case 61 | 14 | 22,700,988  | 22,957,171  | 2 | 2 | 4 | 0 |
| Case 61 | 14 | 22,957,488  | 22,970,256  | 2 | 1 | 3 | 0 |
| Case 61 | 14 | 22,970,327  | 106,047,905 | 1 | 1 | 2 | 0 |
| Case 61 | 14 | 106,067,618 | 106,175,202 | 3 | 1 | 4 | 0 |
| Case 61 | 14 | 106,197,115 | 107,287,663 | 1 | 1 | 2 | 0 |
| Case 61 | 15 | 20,034,919  | 21,904,331  | 1 | 1 | 2 | 0 |
| Case 61 | 15 | 22,299,434  | 22,427,966  | 3 | 1 | 4 | 0 |
| Case 61 | 15 | 22,652,330  | 102,461,162 | 1 | 1 | 2 | 0 |
| Case 61 | 16 | 88,165      | 35,285,582  | 1 | 1 | 2 | 0 |
| Case 61 | 16 | 46,450,037  | 78,291,853  | 1 | 1 | 2 | 0 |
| Case 61 | 16 | 78,295,798  | 78,466,758  | 1 | 0 | 1 | 0 |
| Case 61 | 16 | 78,470,718  | 90,274,695  | 1 | 1 | 2 | 0 |
| Case 61 | 17 | 11,885      | 22,242,355  | 1 | 1 | 2 | 0 |
| Case 61 | 17 | 25,268,142  | 63,761,473  | 1 | 1 | 2 | 0 |
| Case 61 | 17 | 63,771,970  | 63,774,619  | 0 | 0 | 0 | 0 |
| Case 61 | 17 | 63,776,591  | 81,060,040  | 1 | 1 | 2 | 0 |
| Case 61 | 18 | 87,505      | 680,520     | 1 | 1 | 2 | 0 |
| Case 61 | 18 | 681,962     | 687,270     | 0 | 0 | 0 | 0 |
| Case 61 | 18 | 691,173     | 15,375,878  | 1 | 1 | 2 | 0 |
| Case 61 | 18 | 18,520,354  | 78,015,180  | 1 | 1 | 2 | 0 |
| Case 61 | 19 | 260,912     | 24,629,285  | 1 | 1 | 2 | 0 |
| Case 61 | 19 | 27,732,159  | 56,313,528  | 1 | 1 | 2 | 0 |
| Case 61 | 19 | 56,313,790  | 56,459,703  | 3 | 1 | 4 | 0 |
| Case 61 | 19 | 56,462,032  | 59,097,160  | 1 | 1 | 2 | 0 |
| Case 61 | 20 | 63,244      | 26,293,985  | 1 | 1 | 2 | 0 |
| Case 61 | 20 | 29,425,357  | 62,948,788  | 1 | 1 | 2 | 0 |
| Case 61 | 21 | 10,827,533  | 10,971,337  | 1 | 0 | 1 | 0 |
| Case 61 | 21 | 14,368,320  | 15,516,948  | 1 | 0 | 1 | 0 |
| Case 61 | 21 | 15,516,976  | 15,611,538  | 0 | 0 | 0 | 0 |
| Case 61 | 21 | 15,613,985  | 15,634,304  | 2 | 0 | 2 | 1 |
| Case 61 | 21 | 15,635,640  | 15,671,844  | 1 | 0 | 1 | 0 |
| Case 61 | 21 | 15,672,376  | 15,735,675  | 2 | 0 | 2 | 1 |
| Case 61 | 21 | 15,737,925  | 15,845,811  | 0 | 0 | 0 | 0 |
| Case 61 | 21 | 15,849,705  | 16,056,850  | 1 | 0 | 1 | 0 |
| Case 61 | 21 | 16,057,936  | 16,078,744  | 2 | 0 | 2 | 1 |
| Case 61 | 21 | 16,082,060  | 16,116,306  | 0 | 0 | 0 | 0 |
| Case 61 | 21 | 16,121,422  | 16,141,723  | 2 | 0 | 2 | 1 |
| Case 61 | 21 | 16,145,455  | 17,034,757  | 1 | 0 | 1 | 0 |
| Case 61 | 21 | 17,036,954  | 17,059,038  | 2 | 0 | 2 | 1 |
| Case 61 | 21 | 17,065,143  | 17,654,621  | 0 | 0 | 0 | 0 |
| Case 61 | 21 | 17,657,785  | 17,670,775  | 2 | 0 | 2 | 1 |
| Case 61 | 21 | 17,675,675  | 18,208,052  | 0 | 0 | 0 | 0 |
| Case 61 | 21 | 18,209,270  | 18,258,451  | 2 | 0 | 2 | 1 |
| Case 61 | 21 | 18,259,803  | 18,431,858  | 0 | 0 | 0 | 0 |

|         |    |            |            |   |   |   |   |
|---------|----|------------|------------|---|---|---|---|
| Case 61 | 21 | 18,433,036 | 18,512,554 | 2 | 0 | 2 | 1 |
| Case 61 | 21 | 18,513,763 | 18,544,139 | 0 | 0 | 0 | 0 |
| Case 61 | 21 | 18,550,189 | 18,719,490 | 2 | 0 | 2 | 1 |
| Case 61 | 21 | 18,720,293 | 18,781,682 | 0 | 0 | 0 | 0 |
| Case 61 | 21 | 18,785,657 | 18,951,211 | 2 | 0 | 2 | 1 |
| Case 61 | 21 | 18,951,922 | 19,101,049 | 0 | 0 | 0 | 0 |
| Case 61 | 21 | 19,111,192 | 19,161,689 | 2 | 0 | 2 | 1 |
| Case 61 | 21 | 19,162,434 | 19,481,354 | 0 | 0 | 0 | 0 |
| Case 61 | 21 | 19,481,895 | 19,496,429 | 1 | 0 | 1 | 0 |
| Case 61 | 21 | 19,497,133 | 19,526,240 | 2 | 0 | 2 | 1 |
| Case 61 | 21 | 19,526,572 | 20,092,485 | 0 | 0 | 0 | 0 |
| Case 61 | 21 | 20,099,787 | 20,725,800 | 1 | 0 | 1 | 0 |
| Case 61 | 21 | 20,733,268 | 20,916,592 | 1 | 1 | 2 | 0 |
| Case 61 | 21 | 20,917,695 | 21,278,832 | 1 | 0 | 1 | 0 |
| Case 61 | 21 | 21,283,010 | 21,444,306 | 1 | 1 | 2 | 0 |
| Case 61 | 21 | 21,472,584 | 21,535,472 | 0 | 0 | 0 | 0 |
| Case 61 | 21 | 21,535,568 | 21,595,001 | 2 | 0 | 2 | 1 |
| Case 61 | 21 | 21,595,797 | 21,719,191 | 0 | 0 | 0 | 0 |
| Case 61 | 21 | 21,719,802 | 21,769,693 | 2 | 0 | 2 | 1 |
| Case 61 | 21 | 21,775,361 | 22,044,940 | 0 | 0 | 0 | 0 |
| Case 61 | 21 | 22,048,355 | 22,134,353 | 2 | 0 | 2 | 1 |
| Case 61 | 21 | 22,138,217 | 22,197,073 | 0 | 0 | 0 | 0 |
| Case 61 | 21 | 22,200,200 | 22,322,128 | 1 | 1 | 2 | 0 |
| Case 61 | 21 | 22,323,966 | 22,502,404 | 1 | 0 | 1 | 0 |
| Case 61 | 21 | 22,502,823 | 23,180,570 | 1 | 1 | 2 | 0 |
| Case 61 | 21 | 23,183,066 | 23,508,194 | 1 | 0 | 1 | 0 |
| Case 61 | 21 | 23,509,145 | 24,198,815 | 0 | 0 | 0 | 0 |
| Case 61 | 21 | 24,200,410 | 24,278,597 | 2 | 0 | 2 | 1 |
| Case 61 | 21 | 24,286,536 | 25,227,346 | 0 | 0 | 0 | 0 |
| Case 61 | 21 | 25,227,478 | 25,241,584 | 2 | 0 | 2 | 1 |
| Case 61 | 21 | 25,245,493 | 25,370,697 | 0 | 0 | 0 | 0 |
| Case 61 | 21 | 25,377,909 | 25,377,909 | 2 | 0 | 2 | 1 |
| Case 61 | 21 | 25,378,074 | 25,469,662 | 1 | 0 | 1 | 0 |
| Case 61 | 21 | 25,470,087 | 25,900,645 | 0 | 0 | 0 | 0 |
| Case 61 | 21 | 25,903,696 | 25,923,874 | 2 | 0 | 2 | 1 |
| Case 61 | 21 | 25,924,849 | 25,985,248 | 0 | 0 | 0 | 0 |
| Case 61 | 21 | 25,995,139 | 26,029,245 | 2 | 0 | 2 | 1 |
| Case 61 | 21 | 26,029,465 | 26,080,959 | 0 | 0 | 0 | 0 |
| Case 61 | 21 | 26,082,625 | 26,104,135 | 2 | 0 | 2 | 1 |
| Case 61 | 21 | 26,107,503 | 26,646,303 | 0 | 0 | 0 | 0 |
| Case 61 | 21 | 26,661,518 | 26,860,307 | 1 | 0 | 1 | 0 |
| Case 61 | 21 | 26,866,666 | 27,071,018 | 0 | 0 | 0 | 0 |
| Case 61 | 21 | 27,071,133 | 27,326,911 | 1 | 0 | 1 | 0 |
| Case 61 | 21 | 27,327,580 | 27,337,921 | 2 | 0 | 2 | 1 |
| Case 61 | 21 | 27,338,895 | 27,370,876 | 0 | 0 | 0 | 0 |
| Case 61 | 21 | 27,374,450 | 27,448,787 | 2 | 0 | 2 | 1 |
| Case 61 | 21 | 27,454,995 | 27,513,837 | 0 | 0 | 0 | 0 |
| Case 61 | 21 | 27,514,740 | 27,666,882 | 2 | 0 | 2 | 1 |
| Case 61 | 21 | 27,676,401 | 27,723,281 | 0 | 0 | 0 | 0 |
| Case 61 | 21 | 27,724,640 | 27,759,926 | 2 | 0 | 2 | 1 |
| Case 61 | 21 | 27,763,523 | 27,796,390 | 0 | 0 | 0 | 0 |
| Case 61 | 21 | 27,796,993 | 27,832,331 | 2 | 0 | 2 | 1 |
| Case 61 | 21 | 27,834,151 | 27,852,668 | 0 | 0 | 0 | 0 |
| Case 61 | 21 | 27,852,724 | 27,865,978 | 2 | 0 | 2 | 1 |
| Case 61 | 21 | 27,867,559 | 27,883,752 | 0 | 0 | 0 | 0 |
| Case 61 | 21 | 27,884,497 | 27,982,756 | 1 | 0 | 1 | 0 |
| Case 61 | 21 | 27,983,425 | 28,023,370 | 2 | 0 | 2 | 1 |
| Case 61 | 21 | 28,025,911 | 29,724,890 | 1 | 1 | 2 | 0 |
| Case 61 | 21 | 29,726,454 | 30,009,323 | 1 | 0 | 1 | 0 |
| Case 61 | 21 | 30,014,047 | 30,277,102 | 1 | 1 | 2 | 0 |
| Case 61 | 21 | 30,290,699 | 30,342,992 | 0 | 0 | 0 | 0 |

|         |    |            |            |   |   |   |   |
|---------|----|------------|------------|---|---|---|---|
| Case 61 | 21 | 30,343,003 | 30,699,637 | 1 | 0 | 1 | 0 |
| Case 61 | 21 | 30,714,776 | 30,749,315 | 2 | 0 | 2 | 1 |
| Case 61 | 21 | 30,752,554 | 30,847,259 | 0 | 0 | 0 | 0 |
| Case 61 | 21 | 30,847,949 | 31,132,624 | 1 | 0 | 1 | 0 |
| Case 61 | 21 | 31,136,207 | 31,161,917 | 2 | 0 | 2 | 1 |
| Case 61 | 21 | 31,172,702 | 31,654,638 | 0 | 0 | 0 | 0 |
| Case 61 | 21 | 31,654,809 | 31,869,296 | 1 | 0 | 1 | 0 |
| Case 61 | 21 | 31,871,307 | 31,873,644 | 0 | 0 | 0 | 0 |
| Case 61 | 21 | 31,874,201 | 31,874,201 | 1 | 0 | 1 | 0 |
| Case 61 | 21 | 31,874,224 | 31,965,059 | 2 | 0 | 2 | 1 |
| Case 61 | 21 | 31,973,405 | 32,008,332 | 0 | 0 | 0 | 0 |
| Case 61 | 21 | 32,017,177 | 32,127,637 | 2 | 0 | 2 | 1 |
| Case 61 | 21 | 32,155,783 | 32,252,137 | 0 | 0 | 0 | 0 |
| Case 61 | 21 | 32,253,365 | 32,438,284 | 2 | 0 | 2 | 1 |
| Case 61 | 21 | 32,440,540 | 32,484,078 | 0 | 0 | 0 | 0 |
| Case 61 | 21 | 32,485,200 | 32,537,602 | 1 | 0 | 1 | 0 |
| Case 61 | 21 | 32,546,603 | 35,839,963 | 1 | 1 | 2 | 0 |
| Case 61 | 21 | 35,841,186 | 35,922,006 | 1 | 0 | 1 | 0 |
| Case 61 | 21 | 35,926,150 | 35,987,882 | 1 | 1 | 2 | 0 |
| Case 61 | 21 | 35,993,020 | 36,128,066 | 1 | 0 | 1 | 0 |
| Case 61 | 21 | 36,131,274 | 36,241,929 | 2 | 0 | 2 | 1 |
| Case 61 | 21 | 36,245,198 | 36,276,675 | 0 | 0 | 0 | 0 |
| Case 61 | 21 | 36,279,713 | 36,501,415 | 1 | 0 | 1 | 0 |
| Case 61 | 21 | 36,507,249 | 36,698,195 | 2 | 0 | 2 | 1 |
| Case 61 | 21 | 36,700,822 | 36,854,998 | 0 | 0 | 0 | 0 |
| Case 61 | 21 | 36,856,927 | 37,310,356 | 1 | 0 | 1 | 0 |
| Case 61 | 21 | 37,311,117 | 37,406,849 | 2 | 0 | 2 | 1 |
| Case 61 | 21 | 37,408,071 | 37,443,293 | 1 | 0 | 1 | 0 |
| Case 61 | 21 | 37,443,349 | 37,518,706 | 2 | 0 | 2 | 1 |
| Case 61 | 21 | 37,518,760 | 37,525,829 | 0 | 0 | 0 | 0 |
| Case 61 | 21 | 37,533,405 | 37,584,314 | 2 | 0 | 2 | 1 |
| Case 61 | 21 | 37,586,746 | 37,597,876 | 0 | 0 | 0 | 0 |
| Case 61 | 21 | 37,597,909 | 37,795,217 | 1 | 0 | 1 | 0 |
| Case 61 | 21 | 37,799,800 | 37,826,310 | 2 | 0 | 2 | 1 |
| Case 61 | 21 | 37,829,040 | 37,856,682 | 0 | 0 | 0 | 0 |
| Case 61 | 21 | 37,856,952 | 38,015,220 | 2 | 0 | 2 | 1 |
| Case 61 | 21 | 38,017,529 | 38,042,539 | 0 | 0 | 0 | 0 |
| Case 61 | 21 | 38,047,345 | 38,107,859 | 2 | 0 | 2 | 1 |
| Case 61 | 21 | 38,113,998 | 38,184,059 | 1 | 0 | 1 | 0 |
| Case 61 | 21 | 38,185,881 | 38,287,454 | 2 | 0 | 2 | 1 |
| Case 61 | 21 | 38,288,609 | 38,694,688 | 1 | 0 | 1 | 0 |
| Case 61 | 21 | 38,702,072 | 38,878,590 | 0 | 0 | 0 | 0 |
| Case 61 | 21 | 38,878,599 | 38,934,599 | 2 | 0 | 2 | 1 |
| Case 61 | 21 | 38,936,128 | 39,291,943 | 1 | 0 | 1 | 0 |
| Case 61 | 21 | 39,300,431 | 39,551,232 | 2 | 0 | 2 | 1 |
| Case 61 | 21 | 39,552,192 | 39,592,361 | 0 | 0 | 0 | 0 |
| Case 61 | 21 | 39,601,147 | 40,021,090 | 1 | 0 | 1 | 0 |
| Case 61 | 21 | 40,024,182 | 40,307,225 | 2 | 0 | 2 | 1 |
| Case 61 | 21 | 40,314,704 | 40,335,046 | 0 | 0 | 0 | 0 |
| Case 61 | 21 | 40,337,635 | 40,361,928 | 2 | 0 | 2 | 1 |
| Case 61 | 21 | 40,363,690 | 40,425,289 | 1 | 0 | 1 | 0 |
| Case 61 | 21 | 40,425,414 | 40,438,636 | 0 | 0 | 0 | 0 |
| Case 61 | 21 | 40,439,262 | 40,520,783 | 2 | 0 | 2 | 1 |
| Case 61 | 21 | 40,523,026 | 40,669,083 | 0 | 0 | 0 | 0 |
| Case 61 | 21 | 40,669,305 | 40,735,606 | 2 | 0 | 2 | 1 |
| Case 61 | 21 | 40,743,845 | 40,753,824 | 0 | 0 | 0 | 0 |
| Case 61 | 21 | 40,757,973 | 40,778,025 | 2 | 0 | 2 | 1 |
| Case 61 | 21 | 40,778,182 | 40,843,234 | 0 | 0 | 0 | 0 |
| Case 61 | 21 | 40,844,300 | 40,899,071 | 1 | 0 | 1 | 0 |
| Case 61 | 21 | 40,900,348 | 40,952,583 | 2 | 0 | 2 | 1 |
| Case 61 | 21 | 40,955,085 | 41,527,915 | 1 | 0 | 1 | 0 |



|         |    |            |            |   |   |   |   |
|---------|----|------------|------------|---|---|---|---|
| Case 61 | 21 | 41,531,974 | 41,628,089 | 2 | 0 | 2 | 1 |
| Case 61 | 21 | 41,640,542 | 41,801,051 | 0 | 0 | 0 | 0 |
| Case 61 | 21 | 41,801,762 | 41,919,423 | 2 | 0 | 2 | 1 |
| Case 61 | 21 | 41,921,960 | 42,024,151 | 0 | 0 | 0 | 0 |
| Case 61 | 21 | 42,026,941 | 42,249,667 | 2 | 0 | 2 | 1 |
| Case 61 | 21 | 42,251,261 | 42,291,678 | 1 | 0 | 1 | 0 |
| Case 61 | 21 | 42,292,965 | 42,376,163 | 2 | 0 | 2 | 1 |
| Case 61 | 21 | 42,381,055 | 43,188,023 | 1 | 0 | 1 | 0 |
| Case 61 | 21 | 43,191,594 | 43,223,338 | 2 | 0 | 2 | 1 |
| Case 61 | 21 | 43,223,585 | 43,439,562 | 1 | 0 | 1 | 0 |
| Case 61 | 21 | 43,440,157 | 43,496,247 | 2 | 0 | 2 | 1 |
| Case 61 | 21 | 43,496,273 | 43,531,248 | 1 | 0 | 1 | 0 |
| Case 61 | 21 | 43,531,264 | 43,534,835 | 0 | 0 | 0 | 0 |
| Case 61 | 21 | 43,535,986 | 43,554,456 | 2 | 0 | 2 | 1 |
| Case 61 | 21 | 43,554,571 | 43,642,438 | 1 | 0 | 1 | 0 |
| Case 61 | 21 | 43,643,591 | 43,726,490 | 2 | 0 | 2 | 1 |
| Case 61 | 21 | 43,731,405 | 43,746,695 | 1 | 0 | 1 | 0 |
| Case 61 | 21 | 43,759,441 | 43,768,324 | 2 | 0 | 2 | 1 |
| Case 61 | 21 | 43,770,100 | 43,775,884 | 0 | 0 | 0 | 0 |
| Case 61 | 21 | 43,776,682 | 43,786,313 | 2 | 0 | 2 | 1 |
| Case 61 | 21 | 43,786,333 | 43,789,436 | 0 | 0 | 0 | 0 |
| Case 61 | 21 | 43,789,772 | 44,720,807 | 1 | 0 | 1 | 0 |
| Case 61 | 21 | 44,721,579 | 44,734,007 | 0 | 0 | 0 | 0 |
| Case 61 | 21 | 44,737,883 | 44,833,854 | 2 | 0 | 2 | 1 |
| Case 61 | 21 | 44,835,301 | 44,848,070 | 0 | 0 | 0 | 0 |
| Case 61 | 21 | 44,852,616 | 44,874,702 | 2 | 0 | 2 | 1 |
| Case 61 | 21 | 44,875,560 | 45,170,285 | 1 | 0 | 1 | 0 |
| Case 61 | 21 | 45,172,628 | 45,367,464 | 2 | 0 | 2 | 1 |
| Case 61 | 21 | 45,370,715 | 45,403,232 | 1 | 0 | 1 | 0 |
| Case 61 | 21 | 45,404,338 | 45,421,406 | 2 | 0 | 2 | 1 |
| Case 61 | 21 | 45,421,650 | 46,927,500 | 1 | 1 | 2 | 0 |
| Case 61 | 21 | 46,930,092 | 46,950,811 | 1 | 0 | 1 | 0 |
| Case 61 | 21 | 46,950,864 | 47,361,589 | 1 | 1 | 2 | 0 |
| Case 61 | 21 | 47,362,224 | 47,445,184 | 1 | 0 | 1 | 0 |
| Case 61 | 21 | 47,445,791 | 47,590,975 | 1 | 1 | 2 | 0 |
| Case 61 | 21 | 47,596,235 | 47,639,417 | 1 | 0 | 1 | 0 |
| Case 61 | 21 | 47,639,478 | 47,783,504 | 1 | 1 | 2 | 0 |
| Case 61 | 21 | 47,783,806 | 47,863,853 | 1 | 0 | 1 | 0 |
| Case 61 | 21 | 47,864,633 | 48,100,155 | 1 | 1 | 2 | 0 |
| Case 61 | 22 | 16,114,244 | 29,134,338 | 1 | 1 | 2 | 0 |
| Case 61 | 22 | 29,135,889 | 51,195,728 | 2 | 0 | 2 | 1 |
| Case 62 | 1  | 82,154     | 12,868,237 | 1 | 1 | 2 | 0 |
| Case 62 | 1  | 12,871,327 | 12,961,019 | 1 | 0 | 1 | 0 |
| Case 62 | 1  | 13,176,463 | 17,249,161 | 1 | 1 | 2 | 0 |
| Case 62 | 1  | 17,249,170 | 17,261,738 | 1 | 0 | 1 | 0 |
| Case 62 | 1  | 17,265,413 | 18,021,758 | 1 | 1 | 2 | 0 |
| Case 62 | 1  | 18,023,365 | 18,152,665 | 1 | 0 | 1 | 0 |
| Case 62 | 1  | 18,152,871 | 18,183,424 | 2 | 0 | 2 | 1 |
| Case 62 | 1  | 18,189,098 | 18,335,916 | 1 | 0 | 1 | 0 |
| Case 62 | 1  | 18,336,903 | 18,355,150 | 2 | 0 | 2 | 1 |
| Case 62 | 1  | 18,355,412 | 18,533,281 | 1 | 0 | 1 | 0 |
| Case 62 | 1  | 18,543,784 | 81,342,300 | 1 | 1 | 2 | 0 |
| Case 62 | 1  | 81,342,496 | 81,960,171 | 1 | 0 | 1 | 0 |
| Case 62 | 1  | 81,969,284 | 81,995,870 | 2 | 0 | 2 | 1 |
| Case 62 | 1  | 81,996,353 | 82,777,956 | 1 | 0 | 1 | 0 |
| Case 62 | 1  | 82,787,818 | 82,835,418 | 2 | 0 | 2 | 1 |
| Case 62 | 1  | 82,836,012 | 88,109,828 | 1 | 0 | 1 | 0 |
| Case 62 | 1  | 88,112,646 | 88,150,542 | 2 | 0 | 2 | 1 |
| Case 62 | 1  | 88,154,296 | 90,048,248 | 1 | 0 | 1 | 0 |
| Case 62 | 1  | 90,048,531 | 90,245,167 | 2 | 0 | 2 | 1 |
| Case 62 | 1  | 90,248,302 | 91,206,170 | 1 | 0 | 1 | 0 |

|         |   |             |             |   |   |   |   |
|---------|---|-------------|-------------|---|---|---|---|
| Case 62 | 1 | 91,209,986  | 91,260,316  | 2 | 0 | 2 | 1 |
| Case 62 | 1 | 91,264,138  | 91,586,000  | 1 | 0 | 1 | 0 |
| Case 62 | 1 | 91,602,551  | 91,632,172  | 2 | 0 | 2 | 1 |
| Case 62 | 1 | 91,633,434  | 92,230,498  | 1 | 0 | 1 | 0 |
| Case 62 | 1 | 92,237,572  | 92,425,621  | 2 | 0 | 2 | 1 |
| Case 62 | 1 | 92,426,474  | 94,473,808  | 1 | 0 | 1 | 0 |
| Case 62 | 1 | 94,473,845  | 94,499,133  | 2 | 0 | 2 | 1 |
| Case 62 | 1 | 94,501,594  | 94,564,522  | 1 | 0 | 1 | 0 |
| Case 62 | 1 | 94,564,529  | 94,586,844  | 2 | 0 | 2 | 1 |
| Case 62 | 1 | 94,586,890  | 94,929,485  | 1 | 0 | 1 | 0 |
| Case 62 | 1 | 94,930,345  | 95,230,514  | 2 | 0 | 2 | 1 |
| Case 62 | 1 | 95,232,272  | 95,825,187  | 1 | 0 | 1 | 0 |
| Case 62 | 1 | 95,828,652  | 97,926,839  | 1 | 1 | 2 | 0 |
| Case 62 | 1 | 97,932,659  | 97,951,313  | 2 | 1 | 3 | 0 |
| Case 62 | 1 | 97,955,273  | 109,366,554 | 1 | 1 | 2 | 0 |
| Case 62 | 1 | 109,367,944 | 109,371,874 | 1 | 0 | 1 | 0 |
| Case 62 | 1 | 109,373,214 | 121,346,616 | 1 | 1 | 2 | 0 |
| Case 62 | 1 | 142,649,718 | 145,608,122 | 1 | 1 | 2 | 0 |
| Case 62 | 1 | 145,608,146 | 145,762,959 | 1 | 0 | 1 | 0 |
| Case 62 | 1 | 145,765,424 | 148,937,908 | 1 | 1 | 2 | 0 |
| Case 62 | 1 | 149,039,031 | 149,201,987 | 1 | 0 | 1 | 0 |
| Case 62 | 1 | 149,660,940 | 151,773,167 | 1 | 1 | 2 | 0 |
| Case 62 | 1 | 151,773,851 | 152,160,437 | 2 | 1 | 3 | 0 |
| Case 62 | 1 | 152,161,735 | 249,218,992 | 1 | 1 | 2 | 0 |
| Case 62 | 2 | 18,674      | 92,081,640  | 1 | 1 | 2 | 0 |
| Case 62 | 2 | 95,429,424  | 114,341,190 | 1 | 1 | 2 | 0 |
| Case 62 | 2 | 114,404,126 | 114,503,873 | 2 | 1 | 3 | 0 |
| Case 62 | 2 | 114,508,022 | 142,191,011 | 1 | 1 | 2 | 0 |
| Case 62 | 2 | 142,194,933 | 142,286,840 | 1 | 0 | 1 | 0 |
| Case 62 | 2 | 142,287,827 | 243,048,760 | 1 | 1 | 2 | 0 |
| Case 62 | 3 | 61,495      | 27,390,490  | 1 | 1 | 2 | 0 |
| Case 62 | 3 | 27,393,976  | 27,707,901  | 1 | 0 | 1 | 0 |
| Case 62 | 3 | 27,709,178  | 60,448,671  | 1 | 1 | 2 | 0 |
| Case 62 | 3 | 60,453,227  | 60,461,416  | 1 | 0 | 1 | 0 |
| Case 62 | 3 | 60,461,994  | 60,498,172  | 2 | 0 | 2 | 1 |
| Case 62 | 3 | 60,498,520  | 60,523,330  | 1 | 0 | 1 | 0 |
| Case 62 | 3 | 60,531,242  | 90,442,925  | 1 | 1 | 2 | 0 |
| Case 62 | 3 | 93,537,290  | 103,062,026 | 1 | 1 | 2 | 0 |
| Case 62 | 3 | 103,079,255 | 103,094,740 | 0 | 0 | 0 | 0 |
| Case 62 | 3 | 103,097,277 | 103,097,277 | 1 | 0 | 1 | 0 |
| Case 62 | 3 | 103,099,956 | 197,838,262 | 1 | 1 | 2 | 0 |
| Case 62 | 4 | 71,566      | 265,955     | 2 | 1 | 3 | 0 |
| Case 62 | 4 | 266,147     | 438,030     | 1 | 1 | 2 | 0 |
| Case 62 | 4 | 438,080     | 501,212     | 2 | 1 | 3 | 0 |
| Case 62 | 4 | 501,347     | 4,137,172   | 1 | 1 | 2 | 0 |
| Case 62 | 4 | 4,167,133   | 6,292,945   | 2 | 1 | 3 | 0 |
| Case 62 | 4 | 6,293,040   | 6,325,086   | 1 | 1 | 2 | 0 |
| Case 62 | 4 | 6,325,177   | 6,918,679   | 2 | 1 | 3 | 0 |
| Case 62 | 4 | 6,919,661   | 7,035,637   | 1 | 1 | 2 | 0 |
| Case 62 | 4 | 7,039,197   | 8,373,088   | 2 | 1 | 3 | 0 |
| Case 62 | 4 | 8,373,832   | 8,608,634   | 1 | 1 | 2 | 0 |
| Case 62 | 4 | 8,609,123   | 9,456,977   | 2 | 1 | 3 | 0 |
| Case 62 | 4 | 9,470,222   | 28,957,536  | 1 | 1 | 2 | 0 |
| Case 62 | 4 | 28,958,205  | 28,972,033  | 1 | 0 | 1 | 0 |
| Case 62 | 4 | 28,975,242  | 38,798,561  | 1 | 1 | 2 | 0 |
| Case 62 | 4 | 38,799,283  | 38,800,339  | 0 | 0 | 0 | 0 |
| Case 62 | 4 | 38,802,528  | 38,829,722  | 1 | 0 | 1 | 0 |
| Case 62 | 4 | 38,829,815  | 41,061,049  | 1 | 1 | 2 | 0 |
| Case 62 | 4 | 41,063,203  | 41,376,347  | 2 | 1 | 3 | 0 |
| Case 62 | 4 | 41,377,619  | 49,620,898  | 1 | 1 | 2 | 0 |
| Case 62 | 4 | 52,697,856  | 72,215,759  | 1 | 1 | 2 | 0 |

|         |   |             |             |   |   |   |   |
|---------|---|-------------|-------------|---|---|---|---|
| Case 62 | 4 | 72,237,431  | 72,618,334  | 1 | 0 | 1 | 0 |
| Case 62 | 4 | 72,620,162  | 91,866,171  | 1 | 1 | 2 | 0 |
| Case 62 | 4 | 91,868,624  | 91,902,620  | 1 | 0 | 1 | 0 |
| Case 62 | 4 | 91,910,883  | 92,281,057  | 1 | 1 | 2 | 0 |
| Case 62 | 4 | 92,283,771  | 92,421,296  | 1 | 0 | 1 | 0 |
| Case 62 | 4 | 92,431,729  | 133,513,991 | 1 | 1 | 2 | 0 |
| Case 62 | 4 | 133,517,802 | 133,577,811 | 1 | 0 | 1 | 0 |
| Case 62 | 4 | 133,581,317 | 186,851,062 | 1 | 1 | 2 | 0 |
| Case 62 | 4 | 186,855,364 | 186,943,462 | 2 | 1 | 3 | 0 |
| Case 62 | 4 | 186,944,931 | 190,963,766 | 1 | 1 | 2 | 0 |
| Case 62 | 5 | 38,139      | 1,051,687   | 1 | 1 | 2 | 0 |
| Case 62 | 5 | 1,051,918   | 1,243,427   | 2 | 1 | 3 | 0 |
| Case 62 | 5 | 1,243,475   | 46,399,093  | 1 | 1 | 2 | 0 |
| Case 62 | 5 | 49,457,282  | 58,886,873  | 1 | 1 | 2 | 0 |
| Case 62 | 5 | 58,893,931  | 59,398,304  | 1 | 0 | 1 | 0 |
| Case 62 | 5 | 59,420,684  | 59,439,082  | 2 | 0 | 2 | 1 |
| Case 62 | 5 | 59,445,137  | 59,847,754  | 1 | 0 | 1 | 0 |
| Case 62 | 5 | 59,877,538  | 105,453,357 | 1 | 1 | 2 | 0 |
| Case 62 | 5 | 105,471,506 | 105,529,139 | 1 | 0 | 1 | 0 |
| Case 62 | 5 | 105,542,302 | 139,931,384 | 1 | 1 | 2 | 0 |
| Case 62 | 5 | 139,931,607 | 139,931,653 | 0 | 0 | 0 | 0 |
| Case 62 | 5 | 139,931,655 | 139,936,823 | 1 | 0 | 1 | 0 |
| Case 62 | 5 | 139,936,825 | 178,724,727 | 1 | 1 | 2 | 0 |
| Case 62 | 5 | 178,730,062 | 178,935,665 | 2 | 1 | 3 | 0 |
| Case 62 | 5 | 178,936,722 | 180,693,127 | 1 | 1 | 2 | 0 |
| Case 62 | 6 | 108,666     | 41,908,122  | 1 | 1 | 2 | 0 |
| Case 62 | 6 | 41,910,064  | 42,229,191  | 2 | 1 | 3 | 0 |
| Case 62 | 6 | 42,231,219  | 58,752,089  | 1 | 1 | 2 | 0 |
| Case 62 | 6 | 61,891,118  | 77,000,660  | 1 | 1 | 2 | 0 |
| Case 62 | 6 | 77,020,141  | 77,024,665  | 1 | 0 | 1 | 0 |
| Case 62 | 6 | 77,059,064  | 135,440,127 | 1 | 1 | 2 | 0 |
| Case 62 | 6 | 135,447,773 | 135,659,703 | 2 | 1 | 3 | 0 |
| Case 62 | 6 | 135,669,031 | 138,777,385 | 1 | 1 | 2 | 0 |
| Case 62 | 6 | 138,791,986 | 138,889,283 | 1 | 0 | 1 | 0 |
| Case 62 | 6 | 138,893,460 | 170,980,171 | 1 | 1 | 2 | 0 |
| Case 62 | 7 | 44,935      | 68,920      | 2 | 1 | 3 | 0 |
| Case 62 | 7 | 83,185      | 2,309,271   | 1 | 1 | 2 | 0 |
| Case 62 | 7 | 2,309,355   | 2,724,098   | 2 | 1 | 3 | 0 |
| Case 62 | 7 | 2,727,337   | 12,982,479  | 1 | 1 | 2 | 0 |
| Case 62 | 7 | 12,990,038  | 13,493,720  | 1 | 0 | 1 | 0 |
| Case 62 | 7 | 13,497,326  | 38,298,285  | 1 | 1 | 2 | 0 |
| Case 62 | 7 | 38,313,248  | 38,356,415  | 2 | 1 | 3 | 0 |
| Case 62 | 7 | 38,356,545  | 58,019,061  | 1 | 1 | 2 | 0 |
| Case 62 | 7 | 61,056,053  | 61,747,794  | 1 | 1 | 2 | 0 |
| Case 62 | 7 | 61,852,895  | 73,889,810  | 1 | 0 | 1 | 0 |
| Case 62 | 7 | 73,891,118  | 74,045,054  | 2 | 0 | 2 | 1 |
| Case 62 | 7 | 74,069,645  | 75,517,489  | 1 | 0 | 1 | 0 |
| Case 62 | 7 | 75,517,907  | 75,608,848  | 2 | 0 | 2 | 1 |
| Case 62 | 7 | 75,608,986  | 75,896,741  | 1 | 0 | 1 | 0 |
| Case 62 | 7 | 75,906,486  | 75,975,427  | 2 | 0 | 2 | 1 |
| Case 62 | 7 | 75,975,586  | 76,336,888  | 1 | 0 | 1 | 0 |
| Case 62 | 7 | 76,341,486  | 76,538,443  | 2 | 0 | 2 | 1 |
| Case 62 | 7 | 76,548,003  | 77,665,201  | 1 | 0 | 1 | 0 |
| Case 62 | 7 | 77,665,925  | 77,696,285  | 2 | 0 | 2 | 1 |
| Case 62 | 7 | 77,706,847  | 82,577,973  | 1 | 0 | 1 | 0 |
| Case 62 | 7 | 82,579,137  | 82,584,553  | 2 | 0 | 2 | 1 |
| Case 62 | 7 | 82,584,573  | 88,964,350  | 1 | 0 | 1 | 0 |
| Case 62 | 7 | 88,964,538  | 88,966,204  | 2 | 0 | 2 | 1 |
| Case 62 | 7 | 88,969,883  | 92,821,959  | 1 | 0 | 1 | 0 |
| Case 62 | 7 | 92,824,879  | 92,855,334  | 2 | 0 | 2 | 1 |
| Case 62 | 7 | 92,855,725  | 94,021,475  | 1 | 0 | 1 | 0 |

|         |    |             |             |   |   |   |   |
|---------|----|-------------|-------------|---|---|---|---|
| Case 62 | 7  | 94,021,546  | 134,925,322 | 1 | 1 | 2 | 0 |
| Case 62 | 7  | 134,927,578 | 134,942,937 | 1 | 0 | 1 | 0 |
| Case 62 | 7  | 134,943,185 | 135,013,131 | 2 | 0 | 2 | 1 |
| Case 62 | 7  | 135,014,808 | 135,119,417 | 1 | 0 | 1 | 0 |
| Case 62 | 7  | 135,123,060 | 149,548,591 | 1 | 1 | 2 | 0 |
| Case 62 | 7  | 149,551,993 | 149,787,501 | 2 | 1 | 3 | 0 |
| Case 62 | 7  | 149,806,076 | 153,478,281 | 1 | 1 | 2 | 0 |
| Case 62 | 7  | 153,485,627 | 153,615,099 | 3 | 1 | 4 | 0 |
| Case 62 | 7  | 153,616,857 | 153,654,045 | 2 | 1 | 3 | 0 |
| Case 62 | 7  | 153,670,448 | 159,119,486 | 1 | 1 | 2 | 0 |
| Case 62 | 8  | 164,984     | 617,885     | 2 | 1 | 3 | 0 |
| Case 62 | 8  | 618,626     | 642,842     | 1 | 1 | 2 | 0 |
| Case 62 | 8  | 644,824     | 2,066,033   | 2 | 1 | 3 | 0 |
| Case 62 | 8  | 2,067,475   | 2,077,127   | 1 | 1 | 2 | 0 |
| Case 62 | 8  | 2,077,177   | 3,784,833   | 2 | 1 | 3 | 0 |
| Case 62 | 8  | 3,786,543   | 3,789,272   | 1 | 0 | 1 | 0 |
| Case 62 | 8  | 3,791,362   | 10,464,706  | 2 | 1 | 3 | 0 |
| Case 62 | 8  | 10,464,727  | 10,468,353  | 1 | 1 | 2 | 0 |
| Case 62 | 8  | 10,468,373  | 15,389,837  | 2 | 1 | 3 | 0 |
| Case 62 | 8  | 15,395,144  | 26,148,748  | 1 | 1 | 2 | 0 |
| Case 62 | 8  | 26,159,509  | 28,535,241  | 2 | 1 | 3 | 0 |
| Case 62 | 8  | 28,541,640  | 37,639,271  | 1 | 1 | 2 | 0 |
| Case 62 | 8  | 37,645,466  | 37,884,310  | 2 | 1 | 3 | 0 |
| Case 62 | 8  | 37,887,422  | 43,791,691  | 1 | 1 | 2 | 0 |
| Case 62 | 8  | 46,886,735  | 50,416,266  | 1 | 1 | 2 | 0 |
| Case 62 | 8  | 50,430,756  | 50,539,763  | 4 | 1 | 5 | 0 |
| Case 62 | 8  | 50,545,758  | 65,213,478  | 1 | 1 | 2 | 0 |
| Case 62 | 8  | 65,227,070  | 88,852,543  | 2 | 1 | 3 | 0 |
| Case 62 | 8  | 88,856,948  | 88,930,662  | 1 | 1 | 2 | 0 |
| Case 62 | 8  | 88,934,441  | 90,366,827  | 2 | 1 | 3 | 0 |
| Case 62 | 8  | 90,369,994  | 90,385,087  | 2 | 0 | 2 | 1 |
| Case 62 | 8  | 90,406,301  | 90,545,792  | 1 | 0 | 1 | 0 |
| Case 62 | 8  | 90,546,979  | 91,127,680  | 2 | 1 | 3 | 0 |
| Case 62 | 8  | 91,130,683  | 91,293,849  | 3 | 1 | 4 | 0 |
| Case 62 | 8  | 91,297,472  | 109,092,541 | 2 | 1 | 3 | 0 |
| Case 62 | 8  | 109,094,747 | 109,272,006 | 1 | 1 | 2 | 0 |
| Case 62 | 8  | 109,280,487 | 128,471,041 | 2 | 1 | 3 | 0 |
| Case 62 | 8  | 128,472,320 | 128,550,123 | 3 | 1 | 4 | 0 |
| Case 62 | 8  | 128,558,990 | 128,657,531 | 2 | 1 | 3 | 0 |
| Case 62 | 8  | 128,660,096 | 128,706,908 | 3 | 1 | 4 | 0 |
| Case 62 | 8  | 128,707,095 | 141,847,249 | 2 | 1 | 3 | 0 |
| Case 62 | 8  | 141,857,322 | 142,189,589 | 2 | 0 | 2 | 1 |
| Case 62 | 8  | 142,190,927 | 144,919,284 | 2 | 1 | 3 | 0 |
| Case 62 | 8  | 144,919,852 | 144,943,446 | 1 | 1 | 2 | 0 |
| Case 62 | 8  | 144,943,745 | 144,984,956 | 2 | 1 | 3 | 0 |
| Case 62 | 8  | 144,990,587 | 145,011,204 | 1 | 1 | 2 | 0 |
| Case 62 | 8  | 145,012,801 | 145,094,836 | 2 | 1 | 3 | 0 |
| Case 62 | 8  | 145,094,849 | 145,216,008 | 1 | 1 | 2 | 0 |
| Case 62 | 8  | 145,223,191 | 146,293,414 | 2 | 1 | 3 | 0 |
| Case 62 | 9  | 46,587      | 9,605,832   | 1 | 1 | 2 | 0 |
| Case 62 | 9  | 9,609,283   | 9,685,304   | 1 | 0 | 1 | 0 |
| Case 62 | 9  | 9,687,487   | 26,523,911  | 1 | 1 | 2 | 0 |
| Case 62 | 9  | 26,524,416  | 26,624,871  | 1 | 0 | 1 | 0 |
| Case 62 | 9  | 26,626,081  | 46,944,322  | 1 | 1 | 2 | 0 |
| Case 62 | 9  | 65,629,772  | 141,066,491 | 1 | 1 | 2 | 0 |
| Case 62 | 10 | 98,087      | 4,842,737   | 1 | 1 | 2 | 0 |
| Case 62 | 10 | 4,845,062   | 4,899,130   | 2 | 1 | 3 | 0 |
| Case 62 | 10 | 4,901,798   | 19,357,411  | 1 | 1 | 2 | 0 |
| Case 62 | 10 | 19,357,737  | 19,375,392  | 2 | 1 | 3 | 0 |
| Case 62 | 10 | 19,375,491  | 19,921,103  | 1 | 1 | 2 | 0 |
| Case 62 | 10 | 19,929,513  | 22,611,360  | 1 | 0 | 1 | 0 |

|         |    |             |             |   |   |   |   |
|---------|----|-------------|-------------|---|---|---|---|
| Case 62 | 10 | 22,616,244  | 39,097,912  | 1 | 1 | 2 | 0 |
| Case 62 | 10 | 42,436,301  | 129,843,858 | 1 | 1 | 2 | 0 |
| Case 62 | 10 | 129,845,547 | 129,894,034 | 1 | 0 | 1 | 0 |
| Case 62 | 10 | 129,897,565 | 135,477,883 | 1 | 1 | 2 | 0 |
| Case 62 | 11 | 193,146     | 10,603,648  | 1 | 1 | 2 | 0 |
| Case 62 | 11 | 10,608,389  | 11,440,262  | 2 | 1 | 3 | 0 |
| Case 62 | 11 | 11,441,318  | 40,580,159  | 1 | 1 | 2 | 0 |
| Case 62 | 11 | 40,586,402  | 40,744,768  | 1 | 0 | 1 | 0 |
| Case 62 | 11 | 40,756,460  | 51,591,253  | 1 | 1 | 2 | 0 |
| Case 62 | 11 | 54,794,237  | 134,934,063 | 1 | 1 | 2 | 0 |
| Case 62 | 12 | 191,619     | 34,853,011  | 1 | 1 | 2 | 0 |
| Case 62 | 12 | 37,876,400  | 59,415,687  | 1 | 1 | 2 | 0 |
| Case 62 | 12 | 59,420,090  | 59,492,245  | 2 | 1 | 3 | 0 |
| Case 62 | 12 | 59,494,106  | 62,983,143  | 1 | 1 | 2 | 0 |
| Case 62 | 12 | 62,986,620  | 63,057,811  | 1 | 0 | 1 | 0 |
| Case 62 | 12 | 63,060,342  | 63,162,879  | 2 | 0 | 2 | 1 |
| Case 62 | 12 | 63,167,606  | 133,810,935 | 1 | 1 | 2 | 0 |
| Case 62 | 13 | 19,058,717  | 19,423,079  | 2 | 0 | 2 | 1 |
| Case 62 | 13 | 19,450,614  | 19,645,637  | 3 | 0 | 3 | 1 |
| Case 62 | 13 | 19,648,358  | 20,689,298  | 2 | 0 | 2 | 1 |
| Case 62 | 13 | 20,695,554  | 20,891,653  | 3 | 0 | 3 | 1 |
| Case 62 | 13 | 20,893,431  | 21,118,721  | 2 | 0 | 2 | 1 |
| Case 62 | 13 | 21,120,557  | 21,622,034  | 3 | 0 | 3 | 1 |
| Case 62 | 13 | 21,625,473  | 22,425,690  | 2 | 0 | 2 | 1 |
| Case 62 | 13 | 22,427,753  | 22,649,069  | 3 | 0 | 3 | 1 |
| Case 62 | 13 | 22,651,348  | 23,112,285  | 2 | 0 | 2 | 1 |
| Case 62 | 13 | 23,114,395  | 23,349,733  | 3 | 0 | 3 | 1 |
| Case 62 | 13 | 23,350,509  | 23,470,137  | 2 | 0 | 2 | 1 |
| Case 62 | 13 | 23,478,133  | 23,625,373  | 3 | 0 | 3 | 1 |
| Case 62 | 13 | 23,625,664  | 23,824,818  | 2 | 0 | 2 | 1 |
| Case 62 | 13 | 23,827,815  | 23,865,644  | 3 | 0 | 3 | 1 |
| Case 62 | 13 | 23,868,510  | 24,255,384  | 2 | 0 | 2 | 1 |
| Case 62 | 13 | 24,255,594  | 24,839,437  | 3 | 0 | 3 | 1 |
| Case 62 | 13 | 24,847,311  | 25,573,633  | 2 | 0 | 2 | 1 |
| Case 62 | 13 | 25,579,336  | 25,743,803  | 3 | 0 | 3 | 1 |
| Case 62 | 13 | 25,744,055  | 26,173,654  | 2 | 0 | 2 | 1 |
| Case 62 | 13 | 26,174,679  | 26,519,625  | 3 | 0 | 3 | 1 |
| Case 62 | 13 | 26,522,930  | 26,630,094  | 2 | 0 | 2 | 1 |
| Case 62 | 13 | 26,637,596  | 26,700,180  | 3 | 0 | 3 | 1 |
| Case 62 | 13 | 26,700,284  | 26,986,735  | 2 | 0 | 2 | 1 |
| Case 62 | 13 | 26,987,527  | 27,090,036  | 3 | 0 | 3 | 1 |
| Case 62 | 13 | 27,097,235  | 27,272,502  | 2 | 0 | 2 | 1 |
| Case 62 | 13 | 27,273,093  | 27,321,268  | 3 | 0 | 3 | 1 |
| Case 62 | 13 | 27,322,777  | 27,930,900  | 2 | 0 | 2 | 1 |
| Case 62 | 13 | 27,933,910  | 27,989,415  | 3 | 0 | 3 | 1 |
| Case 62 | 13 | 27,992,794  | 28,150,381  | 2 | 0 | 2 | 1 |
| Case 62 | 13 | 28,152,734  | 28,284,941  | 3 | 0 | 3 | 1 |
| Case 62 | 13 | 28,286,430  | 28,562,605  | 2 | 0 | 2 | 1 |
| Case 62 | 13 | 28,562,901  | 28,578,209  | 3 | 0 | 3 | 1 |
| Case 62 | 13 | 28,578,221  | 28,840,918  | 2 | 0 | 2 | 1 |
| Case 62 | 13 | 28,844,967  | 29,194,666  | 3 | 0 | 3 | 1 |
| Case 62 | 13 | 29,194,769  | 29,306,506  | 2 | 0 | 2 | 1 |
| Case 62 | 13 | 29,310,780  | 29,581,618  | 3 | 0 | 3 | 1 |
| Case 62 | 13 | 29,584,893  | 29,698,143  | 2 | 0 | 2 | 1 |
| Case 62 | 13 | 29,704,273  | 30,256,751  | 3 | 0 | 3 | 1 |
| Case 62 | 13 | 30,256,874  | 30,320,185  | 2 | 0 | 2 | 1 |
| Case 62 | 13 | 30,332,070  | 30,484,979  | 3 | 0 | 3 | 1 |
| Case 62 | 13 | 30,486,096  | 30,648,399  | 2 | 0 | 2 | 1 |
| Case 62 | 13 | 30,649,751  | 31,079,837  | 3 | 0 | 3 | 1 |
| Case 62 | 13 | 31,080,015  | 31,558,019  | 2 | 0 | 2 | 1 |
| Case 62 | 13 | 31,564,430  | 31,703,734  | 3 | 0 | 3 | 1 |

|         |    |            |            |   |   |   |   |
|---------|----|------------|------------|---|---|---|---|
| Case 62 | 13 | 31,705,415 | 31,945,277 | 2 | 0 | 2 | 1 |
| Case 62 | 13 | 31,950,629 | 32,095,732 | 3 | 0 | 3 | 1 |
| Case 62 | 13 | 32,097,472 | 32,355,432 | 2 | 0 | 2 | 1 |
| Case 62 | 13 | 32,359,778 | 32,764,327 | 3 | 0 | 3 | 1 |
| Case 62 | 13 | 32,766,817 | 33,018,228 | 2 | 0 | 2 | 1 |
| Case 62 | 13 | 33,030,098 | 33,110,134 | 3 | 0 | 3 | 1 |
| Case 62 | 13 | 33,110,351 | 33,552,841 | 2 | 0 | 2 | 1 |
| Case 62 | 13 | 33,553,508 | 33,682,194 | 3 | 0 | 3 | 1 |
| Case 62 | 13 | 33,684,035 | 33,712,785 | 2 | 0 | 2 | 1 |
| Case 62 | 13 | 33,715,272 | 34,411,437 | 3 | 0 | 3 | 1 |
| Case 62 | 13 | 34,422,585 | 34,566,448 | 2 | 0 | 2 | 1 |
| Case 62 | 13 | 34,568,295 | 34,716,568 | 3 | 0 | 3 | 1 |
| Case 62 | 13 | 34,722,390 | 34,825,686 | 2 | 0 | 2 | 1 |
| Case 62 | 13 | 34,826,347 | 34,932,162 | 3 | 0 | 3 | 1 |
| Case 62 | 13 | 34,935,717 | 35,250,631 | 2 | 0 | 2 | 1 |
| Case 62 | 13 | 35,251,941 | 35,489,094 | 3 | 0 | 3 | 1 |
| Case 62 | 13 | 35,493,285 | 35,860,174 | 2 | 0 | 2 | 1 |
| Case 62 | 13 | 35,862,493 | 36,041,311 | 3 | 0 | 3 | 1 |
| Case 62 | 13 | 36,042,269 | 36,241,588 | 2 | 0 | 2 | 1 |
| Case 62 | 13 | 36,242,931 | 36,480,042 | 3 | 0 | 3 | 1 |
| Case 62 | 13 | 36,480,983 | 36,916,985 | 2 | 0 | 2 | 1 |
| Case 62 | 13 | 36,922,823 | 37,499,597 | 3 | 0 | 3 | 1 |
| Case 62 | 13 | 37,500,101 | 37,868,292 | 2 | 0 | 2 | 1 |
| Case 62 | 13 | 37,875,204 | 37,957,009 | 3 | 0 | 3 | 1 |
| Case 62 | 13 | 37,968,151 | 38,248,380 | 2 | 0 | 2 | 1 |
| Case 62 | 13 | 38,248,655 | 38,459,224 | 3 | 0 | 3 | 1 |
| Case 62 | 13 | 38,459,596 | 38,670,647 | 2 | 0 | 2 | 1 |
| Case 62 | 13 | 38,672,455 | 38,877,678 | 3 | 0 | 3 | 1 |
| Case 62 | 13 | 38,880,107 | 39,266,207 | 2 | 0 | 2 | 1 |
| Case 62 | 13 | 39,266,211 | 39,403,675 | 3 | 0 | 3 | 1 |
| Case 62 | 13 | 39,406,629 | 39,456,352 | 2 | 0 | 2 | 1 |
| Case 62 | 13 | 39,457,850 | 39,474,691 | 3 | 0 | 3 | 1 |
| Case 62 | 13 | 39,478,755 | 39,622,451 | 2 | 0 | 2 | 1 |
| Case 62 | 13 | 39,623,621 | 40,018,688 | 3 | 0 | 3 | 1 |
| Case 62 | 13 | 40,020,267 | 40,078,966 | 2 | 0 | 2 | 1 |
| Case 62 | 13 | 40,079,139 | 40,363,878 | 3 | 0 | 3 | 1 |
| Case 62 | 13 | 40,367,908 | 40,500,414 | 2 | 0 | 2 | 1 |
| Case 62 | 13 | 40,502,985 | 41,506,884 | 3 | 0 | 3 | 1 |
| Case 62 | 13 | 41,507,579 | 41,950,643 | 2 | 0 | 2 | 1 |
| Case 62 | 13 | 41,959,056 | 42,352,171 | 3 | 0 | 3 | 1 |
| Case 62 | 13 | 42,363,295 | 42,465,713 | 2 | 0 | 2 | 1 |
| Case 62 | 13 | 42,481,712 | 42,704,451 | 3 | 0 | 3 | 1 |
| Case 62 | 13 | 42,704,669 | 42,801,654 | 2 | 0 | 2 | 1 |
| Case 62 | 13 | 42,803,130 | 42,871,281 | 3 | 0 | 3 | 1 |
| Case 62 | 13 | 42,872,866 | 42,882,620 | 2 | 0 | 2 | 1 |
| Case 62 | 13 | 42,882,762 | 43,842,287 | 3 | 0 | 3 | 1 |
| Case 62 | 13 | 43,843,812 | 43,962,622 | 2 | 0 | 2 | 1 |
| Case 62 | 13 | 43,962,659 | 44,932,534 | 3 | 0 | 3 | 1 |
| Case 62 | 13 | 44,932,904 | 45,319,586 | 2 | 0 | 2 | 1 |
| Case 62 | 13 | 45,321,621 | 45,474,782 | 3 | 0 | 3 | 1 |
| Case 62 | 13 | 45,474,982 | 45,601,999 | 2 | 0 | 2 | 1 |
| Case 62 | 13 | 45,602,125 | 45,667,725 | 3 | 0 | 3 | 1 |
| Case 62 | 13 | 45,685,690 | 46,124,375 | 2 | 0 | 2 | 1 |
| Case 62 | 13 | 46,125,919 | 46,319,427 | 3 | 0 | 3 | 1 |
| Case 62 | 13 | 46,323,261 | 47,109,885 | 2 | 0 | 2 | 1 |
| Case 62 | 13 | 47,112,120 | 47,429,228 | 3 | 0 | 3 | 1 |
| Case 62 | 13 | 47,432,154 | 47,584,754 | 2 | 0 | 2 | 1 |
| Case 62 | 13 | 47,585,566 | 47,908,990 | 3 | 0 | 3 | 1 |
| Case 62 | 13 | 47,917,120 | 48,230,064 | 2 | 0 | 2 | 1 |
| Case 62 | 13 | 48,238,235 | 48,734,519 | 3 | 0 | 3 | 1 |
| Case 62 | 13 | 48,742,061 | 49,110,661 | 2 | 0 | 2 | 1 |

|         |    |            |            |   |   |   |   |
|---------|----|------------|------------|---|---|---|---|
| Case 62 | 13 | 49,123,516 | 50,586,405 | 3 | 0 | 3 | 1 |
| Case 62 | 13 | 50,586,897 | 51,102,058 | 2 | 0 | 2 | 1 |
| Case 62 | 13 | 51,105,334 | 51,237,502 | 1 | 0 | 1 | 0 |
| Case 62 | 13 | 51,243,141 | 51,321,034 | 2 | 0 | 2 | 1 |
| Case 62 | 13 | 51,322,188 | 51,440,111 | 3 | 0 | 3 | 1 |
| Case 62 | 13 | 51,440,933 | 51,601,735 | 2 | 0 | 2 | 1 |
| Case 62 | 13 | 51,603,768 | 51,853,117 | 3 | 0 | 3 | 1 |
| Case 62 | 13 | 51,854,595 | 52,365,354 | 2 | 0 | 2 | 1 |
| Case 62 | 13 | 52,367,207 | 52,409,860 | 3 | 0 | 3 | 1 |
| Case 62 | 13 | 52,410,120 | 53,309,433 | 2 | 0 | 2 | 1 |
| Case 62 | 13 | 53,311,557 | 53,523,952 | 3 | 0 | 3 | 1 |
| Case 62 | 13 | 53,524,103 | 54,059,116 | 2 | 0 | 2 | 1 |
| Case 62 | 13 | 54,060,827 | 54,182,609 | 3 | 0 | 3 | 1 |
| Case 62 | 13 | 54,195,907 | 54,528,432 | 2 | 0 | 2 | 1 |
| Case 62 | 13 | 54,531,287 | 55,118,412 | 3 | 0 | 3 | 1 |
| Case 62 | 13 | 55,121,022 | 55,389,385 | 2 | 0 | 2 | 1 |
| Case 62 | 13 | 55,410,641 | 55,875,284 | 3 | 0 | 3 | 1 |
| Case 62 | 13 | 55,884,268 | 56,574,691 | 2 | 0 | 2 | 1 |
| Case 62 | 13 | 56,578,765 | 57,156,001 | 3 | 0 | 3 | 1 |
| Case 62 | 13 | 57,183,350 | 58,838,656 | 2 | 0 | 2 | 1 |
| Case 62 | 13 | 58,840,509 | 60,031,328 | 3 | 0 | 3 | 1 |
| Case 62 | 13 | 60,040,234 | 60,215,512 | 2 | 0 | 2 | 1 |
| Case 62 | 13 | 60,218,316 | 60,544,492 | 3 | 0 | 3 | 1 |
| Case 62 | 13 | 60,545,105 | 60,590,107 | 2 | 0 | 2 | 1 |
| Case 62 | 13 | 60,590,205 | 61,409,805 | 3 | 0 | 3 | 1 |
| Case 62 | 13 | 61,410,191 | 61,601,904 | 2 | 0 | 2 | 1 |
| Case 62 | 13 | 61,603,054 | 61,984,781 | 3 | 0 | 3 | 1 |
| Case 62 | 13 | 61,985,401 | 61,989,161 | 2 | 0 | 2 | 1 |
| Case 62 | 13 | 61,989,175 | 62,064,817 | 3 | 0 | 3 | 1 |
| Case 62 | 13 | 62,068,438 | 62,629,774 | 2 | 0 | 2 | 1 |
| Case 62 | 13 | 62,640,800 | 63,145,579 | 3 | 0 | 3 | 1 |
| Case 62 | 13 | 63,160,598 | 63,262,970 | 2 | 0 | 2 | 1 |
| Case 62 | 13 | 63,277,176 | 63,521,891 | 3 | 0 | 3 | 1 |
| Case 62 | 13 | 63,530,550 | 64,000,226 | 2 | 0 | 2 | 1 |
| Case 62 | 13 | 64,000,669 | 64,240,088 | 3 | 0 | 3 | 1 |
| Case 62 | 13 | 64,242,477 | 64,553,688 | 2 | 0 | 2 | 1 |
| Case 62 | 13 | 64,555,757 | 64,620,998 | 3 | 0 | 3 | 1 |
| Case 62 | 13 | 64,626,247 | 64,882,951 | 2 | 0 | 2 | 1 |
| Case 62 | 13 | 64,884,501 | 65,985,590 | 3 | 0 | 3 | 1 |
| Case 62 | 13 | 65,985,897 | 66,338,836 | 2 | 0 | 2 | 1 |
| Case 62 | 13 | 66,338,922 | 67,302,371 | 3 | 0 | 3 | 1 |
| Case 62 | 13 | 67,303,241 | 67,516,879 | 2 | 0 | 2 | 1 |
| Case 62 | 13 | 67,519,121 | 68,371,849 | 3 | 0 | 3 | 1 |
| Case 62 | 13 | 68,379,253 | 68,625,169 | 2 | 0 | 2 | 1 |
| Case 62 | 13 | 68,652,684 | 69,452,780 | 3 | 0 | 3 | 1 |
| Case 62 | 13 | 69,453,116 | 69,598,747 | 2 | 0 | 2 | 1 |
| Case 62 | 13 | 69,599,261 | 71,209,158 | 3 | 0 | 3 | 1 |
| Case 62 | 13 | 71,212,504 | 74,370,566 | 4 | 0 | 4 | 1 |
| Case 62 | 13 | 74,372,931 | 74,729,276 | 3 | 0 | 3 | 1 |
| Case 62 | 13 | 74,729,938 | 74,974,859 | 2 | 0 | 2 | 1 |
| Case 62 | 13 | 74,975,469 | 75,082,588 | 3 | 0 | 3 | 1 |
| Case 62 | 13 | 75,084,120 | 75,811,229 | 2 | 0 | 2 | 1 |
| Case 62 | 13 | 75,811,324 | 75,894,015 | 3 | 0 | 3 | 1 |
| Case 62 | 13 | 75,898,371 | 75,981,018 | 2 | 0 | 2 | 1 |
| Case 62 | 13 | 75,983,322 | 76,059,632 | 3 | 0 | 3 | 1 |
| Case 62 | 13 | 76,064,409 | 76,301,193 | 2 | 0 | 2 | 1 |
| Case 62 | 13 | 76,310,850 | 76,807,419 | 3 | 0 | 3 | 1 |
| Case 62 | 13 | 76,807,753 | 76,925,888 | 2 | 0 | 2 | 1 |
| Case 62 | 13 | 76,926,295 | 77,605,164 | 3 | 0 | 3 | 1 |
| Case 62 | 13 | 77,612,293 | 78,042,890 | 2 | 0 | 2 | 1 |
| Case 62 | 13 | 78,044,267 | 78,820,613 | 3 | 0 | 3 | 1 |

|         |    |             |             |   |   |   |   |
|---------|----|-------------|-------------|---|---|---|---|
| Case 62 | 13 | 78,820,747  | 79,459,745  | 2 | 0 | 2 | 1 |
| Case 62 | 13 | 79,464,103  | 79,603,929  | 3 | 0 | 3 | 1 |
| Case 62 | 13 | 79,608,223  | 80,107,332  | 2 | 0 | 2 | 1 |
| Case 62 | 13 | 80,107,472  | 81,831,345  | 3 | 0 | 3 | 1 |
| Case 62 | 13 | 81,833,233  | 82,204,891  | 2 | 0 | 2 | 1 |
| Case 62 | 13 | 82,215,140  | 82,446,327  | 3 | 0 | 3 | 1 |
| Case 62 | 13 | 82,449,544  | 83,085,241  | 2 | 0 | 2 | 1 |
| Case 62 | 13 | 83,107,564  | 83,829,699  | 3 | 0 | 3 | 1 |
| Case 62 | 13 | 83,831,862  | 84,441,104  | 2 | 0 | 2 | 1 |
| Case 62 | 13 | 84,448,852  | 85,054,266  | 3 | 0 | 3 | 1 |
| Case 62 | 13 | 85,055,565  | 85,712,496  | 2 | 0 | 2 | 1 |
| Case 62 | 13 | 85,715,880  | 86,023,878  | 3 | 0 | 3 | 1 |
| Case 62 | 13 | 86,027,377  | 86,133,478  | 2 | 0 | 2 | 1 |
| Case 62 | 13 | 86,139,944  | 86,449,460  | 3 | 0 | 3 | 1 |
| Case 62 | 13 | 86,455,076  | 87,060,467  | 2 | 0 | 2 | 1 |
| Case 62 | 13 | 87,061,837  | 88,217,940  | 3 | 0 | 3 | 1 |
| Case 62 | 13 | 88,227,874  | 88,506,039  | 2 | 0 | 2 | 1 |
| Case 62 | 13 | 88,512,564  | 90,188,973  | 3 | 0 | 3 | 1 |
| Case 62 | 13 | 90,192,152  | 91,393,872  | 2 | 0 | 2 | 1 |
| Case 62 | 13 | 91,408,639  | 91,749,956  | 3 | 0 | 3 | 1 |
| Case 62 | 13 | 91,751,619  | 91,889,801  | 2 | 0 | 2 | 1 |
| Case 62 | 13 | 91,890,014  | 91,981,823  | 3 | 0 | 3 | 1 |
| Case 62 | 13 | 91,983,910  | 92,102,487  | 2 | 0 | 2 | 1 |
| Case 62 | 13 | 92,114,016  | 92,287,315  | 3 | 0 | 3 | 1 |
| Case 62 | 13 | 92,290,179  | 92,582,145  | 2 | 0 | 2 | 1 |
| Case 62 | 13 | 92,584,162  | 93,241,744  | 3 | 0 | 3 | 1 |
| Case 62 | 13 | 93,242,628  | 93,303,777  | 2 | 0 | 2 | 1 |
| Case 62 | 13 | 93,308,561  | 93,646,043  | 3 | 0 | 3 | 1 |
| Case 62 | 13 | 93,646,247  | 93,879,390  | 2 | 0 | 2 | 1 |
| Case 62 | 13 | 93,879,719  | 94,977,567  | 3 | 0 | 3 | 1 |
| Case 62 | 13 | 94,977,668  | 95,037,646  | 2 | 0 | 2 | 1 |
| Case 62 | 13 | 95,038,990  | 95,219,870  | 3 | 0 | 3 | 1 |
| Case 62 | 13 | 95,221,268  | 95,279,467  | 2 | 0 | 2 | 1 |
| Case 62 | 13 | 95,281,129  | 95,513,006  | 3 | 0 | 3 | 1 |
| Case 62 | 13 | 95,514,963  | 95,579,673  | 2 | 0 | 2 | 1 |
| Case 62 | 13 | 95,581,052  | 95,811,599  | 3 | 0 | 3 | 1 |
| Case 62 | 13 | 95,812,745  | 95,837,722  | 2 | 0 | 2 | 1 |
| Case 62 | 13 | 95,838,046  | 95,860,075  | 3 | 0 | 3 | 1 |
| Case 62 | 13 | 95,860,214  | 95,962,578  | 2 | 0 | 2 | 1 |
| Case 62 | 13 | 95,963,788  | 96,055,794  | 3 | 0 | 3 | 1 |
| Case 62 | 13 | 96,055,796  | 96,123,086  | 2 | 0 | 2 | 1 |
| Case 62 | 13 | 96,126,828  | 96,168,492  | 3 | 0 | 3 | 1 |
| Case 62 | 13 | 96,169,686  | 96,866,183  | 2 | 0 | 2 | 1 |
| Case 62 | 13 | 96,870,965  | 97,911,563  | 3 | 0 | 3 | 1 |
| Case 62 | 13 | 97,912,931  | 98,061,465  | 2 | 0 | 2 | 1 |
| Case 62 | 13 | 98,076,178  | 98,433,916  | 3 | 0 | 3 | 1 |
| Case 62 | 13 | 98,436,990  | 98,522,369  | 2 | 0 | 2 | 1 |
| Case 62 | 13 | 98,525,890  | 98,611,106  | 3 | 0 | 3 | 1 |
| Case 62 | 13 | 98,612,163  | 98,719,298  | 2 | 0 | 2 | 1 |
| Case 62 | 13 | 98,722,151  | 99,340,085  | 3 | 0 | 3 | 1 |
| Case 62 | 13 | 99,340,423  | 99,438,618  | 2 | 0 | 2 | 1 |
| Case 62 | 13 | 99,438,976  | 99,788,169  | 3 | 0 | 3 | 1 |
| Case 62 | 13 | 99,796,620  | 100,480,664 | 2 | 0 | 2 | 1 |
| Case 62 | 13 | 100,480,897 | 100,913,883 | 3 | 0 | 3 | 1 |
| Case 62 | 13 | 100,925,464 | 101,070,423 | 2 | 0 | 2 | 1 |
| Case 62 | 13 | 101,072,942 | 101,212,300 | 3 | 0 | 3 | 1 |
| Case 62 | 13 | 101,214,522 | 101,549,258 | 2 | 0 | 2 | 1 |
| Case 62 | 13 | 101,550,773 | 101,734,838 | 3 | 0 | 3 | 1 |
| Case 62 | 13 | 101,735,211 | 101,836,752 | 2 | 0 | 2 | 1 |
| Case 62 | 13 | 101,838,088 | 102,108,087 | 3 | 0 | 3 | 1 |
| Case 62 | 13 | 102,108,308 | 102,366,206 | 2 | 0 | 2 | 1 |



|         |    |             |             |   |   |   |   |
|---------|----|-------------|-------------|---|---|---|---|
| Case 62 | 13 | 102,366,742 | 102,492,232 | 3 | 0 | 3 | 1 |
| Case 62 | 13 | 102,493,223 | 102,556,498 | 2 | 0 | 2 | 1 |
| Case 62 | 13 | 102,556,657 | 103,272,017 | 3 | 0 | 3 | 1 |
| Case 62 | 13 | 103,275,386 | 103,339,709 | 2 | 0 | 2 | 1 |
| Case 62 | 13 | 103,341,164 | 103,383,497 | 3 | 0 | 3 | 1 |
| Case 62 | 13 | 103,383,524 | 103,667,305 | 2 | 0 | 2 | 1 |
| Case 62 | 13 | 103,667,397 | 103,709,569 | 3 | 0 | 3 | 1 |
| Case 62 | 13 | 103,709,825 | 103,727,066 | 2 | 0 | 2 | 1 |
| Case 62 | 13 | 103,728,728 | 103,985,291 | 3 | 0 | 3 | 1 |
| Case 62 | 13 | 103,989,730 | 104,151,462 | 2 | 0 | 2 | 1 |
| Case 62 | 13 | 104,153,016 | 104,300,045 | 3 | 0 | 3 | 1 |
| Case 62 | 13 | 104,300,683 | 104,533,933 | 2 | 0 | 2 | 1 |
| Case 62 | 13 | 104,539,503 | 104,647,290 | 3 | 0 | 3 | 1 |
| Case 62 | 13 | 104,649,962 | 104,818,367 | 2 | 0 | 2 | 1 |
| Case 62 | 13 | 104,819,530 | 105,279,219 | 3 | 0 | 3 | 1 |
| Case 62 | 13 | 105,286,579 | 105,488,375 | 2 | 0 | 2 | 1 |
| Case 62 | 13 | 105,489,539 | 105,589,982 | 3 | 0 | 3 | 1 |
| Case 62 | 13 | 105,593,166 | 105,707,199 | 2 | 0 | 2 | 1 |
| Case 62 | 13 | 105,715,069 | 105,943,879 | 3 | 0 | 3 | 1 |
| Case 62 | 13 | 105,944,572 | 105,986,476 | 2 | 0 | 2 | 1 |
| Case 62 | 13 | 105,987,441 | 106,065,361 | 3 | 0 | 3 | 1 |
| Case 62 | 13 | 106,066,286 | 106,505,404 | 2 | 0 | 2 | 1 |
| Case 62 | 13 | 106,509,195 | 107,172,275 | 3 | 0 | 3 | 1 |
| Case 62 | 13 | 107,172,806 | 107,254,553 | 2 | 0 | 2 | 1 |
| Case 62 | 13 | 107,257,159 | 108,326,571 | 3 | 0 | 3 | 1 |
| Case 62 | 13 | 108,327,953 | 109,066,918 | 2 | 0 | 2 | 1 |
| Case 62 | 13 | 109,077,137 | 109,502,849 | 3 | 0 | 3 | 1 |
| Case 62 | 13 | 109,504,041 | 109,686,087 | 2 | 0 | 2 | 1 |
| Case 62 | 13 | 109,687,009 | 110,130,628 | 3 | 0 | 3 | 1 |
| Case 62 | 13 | 110,137,144 | 110,589,218 | 2 | 0 | 2 | 1 |
| Case 62 | 13 | 110,598,964 | 110,813,991 | 3 | 0 | 3 | 1 |
| Case 62 | 13 | 110,815,400 | 110,908,777 | 2 | 0 | 2 | 1 |
| Case 62 | 13 | 110,909,919 | 111,047,350 | 3 | 0 | 3 | 1 |
| Case 62 | 13 | 111,049,216 | 111,118,382 | 2 | 0 | 2 | 1 |
| Case 62 | 13 | 111,118,948 | 111,231,833 | 3 | 0 | 3 | 1 |
| Case 62 | 13 | 111,235,729 | 111,955,465 | 2 | 0 | 2 | 1 |
| Case 62 | 13 | 111,955,907 | 111,981,222 | 3 | 0 | 3 | 1 |
| Case 62 | 13 | 111,981,399 | 112,144,318 | 2 | 0 | 2 | 1 |
| Case 62 | 13 | 112,144,613 | 112,240,131 | 3 | 0 | 3 | 1 |
| Case 62 | 13 | 112,241,191 | 112,575,568 | 2 | 0 | 2 | 1 |
| Case 62 | 13 | 112,576,137 | 112,651,089 | 3 | 0 | 3 | 1 |
| Case 62 | 13 | 112,651,500 | 113,011,441 | 2 | 0 | 2 | 1 |
| Case 62 | 13 | 113,014,176 | 113,206,738 | 3 | 0 | 3 | 1 |
| Case 62 | 13 | 113,208,394 | 115,103,529 | 2 | 0 | 2 | 1 |
| Case 62 | 14 | 19,280,733  | 20,213,937  | 1 | 0 | 1 | 0 |
| Case 62 | 14 | 20,214,907  | 22,736,661  | 1 | 1 | 2 | 0 |
| Case 62 | 14 | 22,737,346  | 22,946,231  | 2 | 1 | 3 | 0 |
| Case 62 | 14 | 22,947,903  | 67,768,828  | 1 | 1 | 2 | 0 |
| Case 62 | 14 | 67,769,177  | 67,946,912  | 2 | 1 | 3 | 0 |
| Case 62 | 14 | 67,948,482  | 67,964,098  | 2 | 0 | 2 | 1 |
| Case 62 | 14 | 67,964,355  | 68,252,707  | 2 | 1 | 3 | 0 |
| Case 62 | 14 | 68,252,852  | 107,287,663 | 1 | 1 | 2 | 0 |
| Case 62 | 15 | 20,034,919  | 49,081,537  | 1 | 1 | 2 | 0 |
| Case 62 | 15 | 49,083,481  | 49,184,681  | 1 | 0 | 1 | 0 |
| Case 62 | 15 | 49,186,882  | 49,222,246  | 2 | 0 | 2 | 1 |
| Case 62 | 15 | 49,222,576  | 50,528,259  | 1 | 0 | 1 | 0 |
| Case 62 | 15 | 50,530,415  | 50,534,832  | 2 | 0 | 2 | 1 |
| Case 62 | 15 | 50,534,852  | 51,446,916  | 1 | 0 | 1 | 0 |
| Case 62 | 15 | 51,450,000  | 51,507,874  | 2 | 0 | 2 | 1 |
| Case 62 | 15 | 51,507,935  | 53,149,388  | 1 | 0 | 1 | 0 |
| Case 62 | 15 | 53,154,756  | 53,169,284  | 2 | 0 | 2 | 1 |

|         |    |            |             |   |   |   |   |
|---------|----|------------|-------------|---|---|---|---|
| Case 62 | 15 | 53,169,965 | 53,633,410  | 1 | 0 | 1 | 0 |
| Case 62 | 15 | 53,648,048 | 53,716,187  | 2 | 0 | 2 | 1 |
| Case 62 | 15 | 53,719,045 | 57,597,280  | 1 | 0 | 1 | 0 |
| Case 62 | 15 | 57,598,517 | 57,680,883  | 2 | 0 | 2 | 1 |
| Case 62 | 15 | 57,680,959 | 57,745,898  | 1 | 0 | 1 | 0 |
| Case 62 | 15 | 57,745,960 | 57,764,353  | 2 | 0 | 2 | 1 |
| Case 62 | 15 | 57,766,915 | 57,782,249  | 1 | 0 | 1 | 0 |
| Case 62 | 15 | 57,783,250 | 57,836,690  | 2 | 0 | 2 | 1 |
| Case 62 | 15 | 57,836,696 | 58,443,766  | 1 | 0 | 1 | 0 |
| Case 62 | 15 | 58,443,824 | 58,471,327  | 2 | 0 | 2 | 1 |
| Case 62 | 15 | 58,471,357 | 58,676,119  | 1 | 0 | 1 | 0 |
| Case 62 | 15 | 58,678,512 | 58,685,631  | 2 | 0 | 2 | 1 |
| Case 62 | 15 | 58,685,642 | 58,748,906  | 1 | 0 | 1 | 0 |
| Case 62 | 15 | 58,751,587 | 58,852,463  | 2 | 0 | 2 | 1 |
| Case 62 | 15 | 58,853,079 | 59,742,029  | 1 | 0 | 1 | 0 |
| Case 62 | 15 | 59,743,010 | 59,848,505  | 2 | 0 | 2 | 1 |
| Case 62 | 15 | 59,848,556 | 60,116,817  | 1 | 0 | 1 | 0 |
| Case 62 | 15 | 60,126,236 | 60,145,962  | 2 | 0 | 2 | 1 |
| Case 62 | 15 | 60,146,106 | 60,463,545  | 1 | 0 | 1 | 0 |
| Case 62 | 15 | 60,469,637 | 60,592,322  | 2 | 0 | 2 | 1 |
| Case 62 | 15 | 60,600,544 | 60,927,204  | 1 | 0 | 1 | 0 |
| Case 62 | 15 | 60,935,854 | 61,128,890  | 2 | 0 | 2 | 1 |
| Case 62 | 15 | 61,130,045 | 61,825,956  | 1 | 0 | 1 | 0 |
| Case 62 | 15 | 61,826,940 | 61,903,224  | 2 | 0 | 2 | 1 |
| Case 62 | 15 | 61,904,270 | 62,396,198  | 1 | 0 | 1 | 0 |
| Case 62 | 15 | 62,396,389 | 62,429,997  | 2 | 0 | 2 | 1 |
| Case 62 | 15 | 62,433,962 | 62,667,829  | 1 | 0 | 1 | 0 |
| Case 62 | 15 | 62,670,686 | 62,729,354  | 2 | 0 | 2 | 1 |
| Case 62 | 15 | 62,732,330 | 63,265,156  | 1 | 0 | 1 | 0 |
| Case 62 | 15 | 63,265,244 | 63,303,416  | 2 | 0 | 2 | 1 |
| Case 62 | 15 | 63,305,332 | 63,662,157  | 1 | 0 | 1 | 0 |
| Case 62 | 15 | 63,663,833 | 63,687,294  | 2 | 0 | 2 | 1 |
| Case 62 | 15 | 63,690,544 | 65,496,666  | 1 | 0 | 1 | 0 |
| Case 62 | 15 | 65,496,909 | 65,511,429  | 2 | 0 | 2 | 1 |
| Case 62 | 15 | 65,528,494 | 66,314,082  | 1 | 0 | 1 | 0 |
| Case 62 | 15 | 66,319,407 | 66,448,125  | 2 | 0 | 2 | 1 |
| Case 62 | 15 | 66,448,456 | 67,301,687  | 1 | 0 | 1 | 0 |
| Case 62 | 15 | 67,302,639 | 67,467,507  | 2 | 0 | 2 | 1 |
| Case 62 | 15 | 67,473,790 | 68,452,136  | 1 | 0 | 1 | 0 |
| Case 62 | 15 | 68,467,093 | 71,058,520  | 1 | 1 | 2 | 0 |
| Case 62 | 15 | 71,068,158 | 71,143,992  | 2 | 1 | 3 | 0 |
| Case 62 | 15 | 71,144,048 | 102,461,162 | 1 | 1 | 2 | 0 |
| Case 62 | 16 | 88,165     | 112,867     | 2 | 0 | 2 | 1 |
| Case 62 | 16 | 113,027    | 131,109     | 1 | 0 | 1 | 0 |
| Case 62 | 16 | 133,061    | 298,137     | 2 | 0 | 2 | 1 |
| Case 62 | 16 | 298,588    | 348,687     | 1 | 0 | 1 | 0 |
| Case 62 | 16 | 349,293    | 613,344     | 2 | 0 | 2 | 1 |
| Case 62 | 16 | 613,350    | 626,240     | 1 | 0 | 1 | 0 |
| Case 62 | 16 | 627,920    | 678,430     | 2 | 0 | 2 | 1 |
| Case 62 | 16 | 678,877    | 749,057     | 1 | 0 | 1 | 0 |
| Case 62 | 16 | 754,565    | 772,985     | 2 | 0 | 2 | 1 |
| Case 62 | 16 | 772,988    | 1,184,126   | 1 | 0 | 1 | 0 |
| Case 62 | 16 | 1,184,967  | 1,250,279   | 2 | 0 | 2 | 1 |
| Case 62 | 16 | 1,250,378  | 1,288,881   | 1 | 0 | 1 | 0 |
| Case 62 | 16 | 1,295,125  | 1,308,333   | 2 | 0 | 2 | 1 |
| Case 62 | 16 | 1,311,333  | 1,396,609   | 1 | 0 | 1 | 0 |
| Case 62 | 16 | 1,396,891  | 1,532,837   | 2 | 0 | 2 | 1 |
| Case 62 | 16 | 1,535,950  | 1,537,940   | 1 | 0 | 1 | 0 |
| Case 62 | 16 | 1,537,956  | 1,549,233   | 2 | 0 | 2 | 1 |
| Case 62 | 16 | 1,550,113  | 1,574,615   | 1 | 0 | 1 | 0 |
| Case 62 | 16 | 1,574,838  | 1,618,321   | 2 | 0 | 2 | 1 |

|         |    |            |            |   |   |   |   |
|---------|----|------------|------------|---|---|---|---|
| Case 62 | 16 | 1,621,486  | 1,760,091  | 1 | 0 | 1 | 0 |
| Case 62 | 16 | 1,761,319  | 1,812,884  | 2 | 0 | 2 | 1 |
| Case 62 | 16 | 1,813,658  | 1,826,154  | 1 | 0 | 1 | 0 |
| Case 62 | 16 | 1,826,302  | 1,840,711  | 2 | 0 | 2 | 1 |
| Case 62 | 16 | 1,840,741  | 1,859,342  | 1 | 0 | 1 | 0 |
| Case 62 | 16 | 1,859,345  | 1,890,056  | 2 | 0 | 2 | 1 |
| Case 62 | 16 | 1,891,843  | 1,934,183  | 1 | 0 | 1 | 0 |
| Case 62 | 16 | 1,943,418  | 2,024,204  | 2 | 0 | 2 | 1 |
| Case 62 | 16 | 2,024,205  | 2,053,634  | 1 | 0 | 1 | 0 |
| Case 62 | 16 | 2,054,155  | 2,121,610  | 2 | 0 | 2 | 1 |
| Case 62 | 16 | 2,121,617  | 2,158,623  | 1 | 0 | 1 | 0 |
| Case 62 | 16 | 2,159,242  | 2,369,821  | 2 | 0 | 2 | 1 |
| Case 62 | 16 | 2,374,406  | 2,640,086  | 1 | 0 | 1 | 0 |
| Case 62 | 16 | 2,645,965  | 3,010,466  | 2 | 0 | 2 | 1 |
| Case 62 | 16 | 3,014,990  | 3,061,591  | 1 | 0 | 1 | 0 |
| Case 62 | 16 | 3,061,928  | 3,071,122  | 2 | 0 | 2 | 1 |
| Case 62 | 16 | 3,071,246  | 3,100,088  | 1 | 0 | 1 | 0 |
| Case 62 | 16 | 3,100,095  | 3,137,261  | 2 | 0 | 2 | 1 |
| Case 62 | 16 | 3,139,190  | 3,140,276  | 1 | 0 | 1 | 0 |
| Case 62 | 16 | 3,140,506  | 3,165,845  | 2 | 0 | 2 | 1 |
| Case 62 | 16 | 3,165,900  | 3,191,356  | 1 | 0 | 1 | 0 |
| Case 62 | 16 | 3,194,616  | 3,361,884  | 2 | 0 | 2 | 1 |
| Case 62 | 16 | 3,361,922  | 3,372,481  | 1 | 0 | 1 | 0 |
| Case 62 | 16 | 3,377,582  | 3,542,444  | 2 | 0 | 2 | 1 |
| Case 62 | 16 | 3,543,820  | 3,617,306  | 1 | 0 | 1 | 0 |
| Case 62 | 16 | 3,620,927  | 3,839,535  | 2 | 0 | 2 | 1 |
| Case 62 | 16 | 3,839,868  | 4,003,054  | 1 | 0 | 1 | 0 |
| Case 62 | 16 | 4,007,086  | 4,371,526  | 2 | 0 | 2 | 1 |
| Case 62 | 16 | 4,375,056  | 4,460,049  | 1 | 0 | 1 | 0 |
| Case 62 | 16 | 4,462,383  | 4,780,077  | 2 | 0 | 2 | 1 |
| Case 62 | 16 | 4,780,093  | 4,794,957  | 1 | 0 | 1 | 0 |
| Case 62 | 16 | 4,794,958  | 4,802,386  | 2 | 0 | 2 | 1 |
| Case 62 | 16 | 4,802,420  | 4,815,871  | 1 | 0 | 1 | 0 |
| Case 62 | 16 | 4,815,881  | 4,940,732  | 2 | 0 | 2 | 1 |
| Case 62 | 16 | 4,940,782  | 4,945,687  | 1 | 0 | 1 | 0 |
| Case 62 | 16 | 4,945,711  | 5,080,121  | 2 | 0 | 2 | 1 |
| Case 62 | 16 | 5,081,752  | 5,123,474  | 1 | 0 | 1 | 0 |
| Case 62 | 16 | 5,127,081  | 6,082,553  | 2 | 0 | 2 | 1 |
| Case 62 | 16 | 6,082,758  | 6,123,096  | 1 | 0 | 1 | 0 |
| Case 62 | 16 | 6,131,347  | 6,658,369  | 2 | 0 | 2 | 1 |
| Case 62 | 16 | 6,658,709  | 6,707,692  | 1 | 0 | 1 | 0 |
| Case 62 | 16 | 6,709,509  | 6,808,157  | 2 | 0 | 2 | 1 |
| Case 62 | 16 | 6,808,370  | 6,879,583  | 1 | 0 | 1 | 0 |
| Case 62 | 16 | 6,887,689  | 6,921,533  | 2 | 0 | 2 | 1 |
| Case 62 | 16 | 6,922,307  | 6,964,963  | 1 | 0 | 1 | 0 |
| Case 62 | 16 | 6,965,041  | 7,213,392  | 2 | 0 | 2 | 1 |
| Case 62 | 16 | 7,213,617  | 7,238,261  | 1 | 0 | 1 | 0 |
| Case 62 | 16 | 7,239,022  | 10,482,312 | 2 | 0 | 2 | 1 |
| Case 62 | 16 | 10,491,266 | 10,608,343 | 1 | 0 | 1 | 0 |
| Case 62 | 16 | 10,621,940 | 13,665,563 | 2 | 0 | 2 | 1 |
| Case 62 | 16 | 13,666,011 | 13,803,064 | 1 | 0 | 1 | 0 |
| Case 62 | 16 | 13,806,913 | 14,540,868 | 2 | 0 | 2 | 1 |
| Case 62 | 16 | 14,540,918 | 14,759,768 | 1 | 0 | 1 | 0 |
| Case 62 | 16 | 14,760,734 | 18,818,277 | 2 | 0 | 2 | 1 |
| Case 62 | 16 | 18,823,314 | 18,865,003 | 1 | 0 | 1 | 0 |
| Case 62 | 16 | 18,866,201 | 20,331,072 | 2 | 0 | 2 | 1 |
| Case 62 | 16 | 20,331,091 | 20,365,654 | 1 | 0 | 1 | 0 |
| Case 62 | 16 | 20,366,225 | 24,533,699 | 2 | 0 | 2 | 1 |
| Case 62 | 16 | 24,534,662 | 24,600,668 | 1 | 0 | 1 | 0 |
| Case 62 | 16 | 24,614,505 | 28,181,222 | 2 | 0 | 2 | 1 |
| Case 62 | 16 | 28,183,895 | 28,300,448 | 1 | 0 | 1 | 0 |

|         |    |            |            |   |   |   |   |
|---------|----|------------|------------|---|---|---|---|
| Case 62 | 16 | 28,301,487 | 28,329,398 | 2 | 0 | 2 | 1 |
| Case 62 | 16 | 28,334,994 | 28,631,383 | 1 | 0 | 1 | 0 |
| Case 62 | 16 | 28,734,571 | 28,856,819 | 2 | 0 | 2 | 1 |
| Case 62 | 16 | 28,857,363 | 28,944,396 | 1 | 0 | 1 | 0 |
| Case 62 | 16 | 28,944,700 | 28,975,712 | 2 | 0 | 2 | 1 |
| Case 62 | 16 | 28,977,020 | 28,996,757 | 1 | 0 | 1 | 0 |
| Case 62 | 16 | 28,997,204 | 29,614,976 | 2 | 0 | 2 | 1 |
| Case 62 | 16 | 29,647,342 | 29,790,864 | 1 | 0 | 1 | 0 |
| Case 62 | 16 | 29,791,561 | 29,997,064 | 2 | 0 | 2 | 1 |
| Case 62 | 16 | 29,997,648 | 30,005,106 | 1 | 0 | 1 | 0 |
| Case 62 | 16 | 30,005,466 | 30,369,467 | 2 | 0 | 2 | 1 |
| Case 62 | 16 | 30,369,645 | 30,385,837 | 1 | 0 | 1 | 0 |
| Case 62 | 16 | 30,385,953 | 30,393,171 | 2 | 0 | 2 | 1 |
| Case 62 | 16 | 30,393,595 | 30,490,515 | 1 | 0 | 1 | 0 |
| Case 62 | 16 | 30,490,776 | 30,516,492 | 2 | 0 | 2 | 1 |
| Case 62 | 16 | 30,516,565 | 30,740,333 | 1 | 0 | 1 | 0 |
| Case 62 | 16 | 30,746,822 | 30,750,587 | 2 | 0 | 2 | 1 |
| Case 62 | 16 | 30,750,848 | 31,388,400 | 1 | 0 | 1 | 0 |
| Case 62 | 16 | 31,390,954 | 31,470,540 | 2 | 0 | 2 | 1 |
| Case 62 | 16 | 31,471,188 | 31,519,995 | 1 | 0 | 1 | 0 |
| Case 62 | 16 | 31,521,276 | 31,857,706 | 2 | 0 | 2 | 1 |
| Case 62 | 16 | 31,860,399 | 34,321,463 | 1 | 0 | 1 | 0 |
| Case 62 | 16 | 34,360,980 | 34,800,493 | 2 | 0 | 2 | 1 |
| Case 62 | 16 | 34,816,462 | 35,285,582 | 1 | 0 | 1 | 0 |
| Case 62 | 16 | 46,450,037 | 46,848,522 | 1 | 0 | 1 | 0 |
| Case 62 | 16 | 46,856,589 | 47,036,253 | 2 | 0 | 2 | 1 |
| Case 62 | 16 | 47,044,030 | 47,727,381 | 1 | 0 | 1 | 0 |
| Case 62 | 16 | 47,728,083 | 48,231,954 | 2 | 0 | 2 | 1 |
| Case 62 | 16 | 48,232,065 | 48,363,071 | 1 | 0 | 1 | 0 |
| Case 62 | 16 | 48,368,208 | 49,356,011 | 2 | 0 | 2 | 1 |
| Case 62 | 16 | 49,358,158 | 49,403,920 | 1 | 0 | 1 | 0 |
| Case 62 | 16 | 49,407,930 | 49,913,220 | 2 | 0 | 2 | 1 |
| Case 62 | 16 | 49,914,323 | 50,142,944 | 1 | 0 | 1 | 0 |
| Case 62 | 16 | 50,160,494 | 50,324,510 | 2 | 0 | 2 | 1 |
| Case 62 | 16 | 50,324,561 | 50,397,591 | 1 | 0 | 1 | 0 |
| Case 62 | 16 | 50,403,527 | 51,018,998 | 2 | 0 | 2 | 1 |
| Case 62 | 16 | 51,019,711 | 51,171,034 | 1 | 0 | 1 | 0 |
| Case 62 | 16 | 51,171,035 | 51,357,482 | 2 | 0 | 2 | 1 |
| Case 62 | 16 | 51,358,689 | 51,693,036 | 1 | 0 | 1 | 0 |
| Case 62 | 16 | 51,695,551 | 51,751,642 | 2 | 0 | 2 | 1 |
| Case 62 | 16 | 51,752,051 | 51,773,229 | 1 | 0 | 1 | 0 |
| Case 62 | 16 | 51,774,837 | 51,831,554 | 2 | 0 | 2 | 1 |
| Case 62 | 16 | 51,839,557 | 51,878,423 | 1 | 0 | 1 | 0 |
| Case 62 | 16 | 51,883,388 | 53,132,804 | 2 | 0 | 2 | 1 |
| Case 62 | 16 | 53,137,282 | 53,358,439 | 1 | 0 | 1 | 0 |
| Case 62 | 16 | 53,371,208 | 53,489,705 | 2 | 0 | 2 | 1 |
| Case 62 | 16 | 53,493,435 | 53,524,831 | 1 | 0 | 1 | 0 |
| Case 62 | 16 | 53,526,551 | 53,633,081 | 2 | 0 | 2 | 1 |
| Case 62 | 16 | 53,634,295 | 53,797,518 | 1 | 0 | 1 | 0 |
| Case 62 | 16 | 53,799,977 | 53,865,730 | 2 | 0 | 2 | 1 |
| Case 62 | 16 | 53,869,366 | 54,009,501 | 1 | 0 | 1 | 0 |
| Case 62 | 16 | 54,019,686 | 54,581,313 | 2 | 0 | 2 | 1 |
| Case 62 | 16 | 54,587,432 | 54,605,600 | 1 | 0 | 1 | 0 |
| Case 62 | 16 | 54,611,601 | 55,075,080 | 2 | 0 | 2 | 1 |
| Case 62 | 16 | 55,078,667 | 55,090,911 | 1 | 0 | 1 | 0 |
| Case 62 | 16 | 55,092,141 | 55,192,543 | 2 | 0 | 2 | 1 |
| Case 62 | 16 | 55,194,324 | 55,206,573 | 1 | 0 | 1 | 0 |
| Case 62 | 16 | 55,208,351 | 55,447,824 | 2 | 0 | 2 | 1 |
| Case 62 | 16 | 55,452,383 | 55,496,628 | 1 | 0 | 1 | 0 |
| Case 62 | 16 | 55,498,049 | 55,536,687 | 2 | 0 | 2 | 1 |
| Case 62 | 16 | 55,536,723 | 55,710,597 | 1 | 0 | 1 | 0 |

|         |    |            |            |   |   |   |   |
|---------|----|------------|------------|---|---|---|---|
| Case 62 | 16 | 55,713,088 | 56,050,321 | 2 | 0 | 2 | 1 |
| Case 62 | 16 | 56,065,201 | 56,320,979 | 1 | 0 | 1 | 0 |
| Case 62 | 16 | 56,323,232 | 56,401,439 | 2 | 0 | 2 | 1 |
| Case 62 | 16 | 56,402,531 | 56,673,143 | 1 | 0 | 1 | 0 |
| Case 62 | 16 | 56,673,290 | 56,840,328 | 2 | 0 | 2 | 1 |
| Case 62 | 16 | 56,849,496 | 56,989,590 | 1 | 0 | 1 | 0 |
| Case 62 | 16 | 56,991,363 | 57,028,515 | 2 | 0 | 2 | 1 |
| Case 62 | 16 | 57,032,142 | 57,099,155 | 1 | 0 | 1 | 0 |
| Case 62 | 16 | 57,099,690 | 57,171,141 | 2 | 0 | 2 | 1 |
| Case 62 | 16 | 57,171,397 | 57,289,599 | 1 | 0 | 1 | 0 |
| Case 62 | 16 | 57,290,926 | 57,414,623 | 2 | 0 | 2 | 1 |
| Case 62 | 16 | 57,416,023 | 57,416,546 | 1 | 0 | 1 | 0 |
| Case 62 | 16 | 57,416,892 | 57,543,422 | 2 | 0 | 2 | 1 |
| Case 62 | 16 | 57,545,325 | 57,660,708 | 1 | 0 | 1 | 0 |
| Case 62 | 16 | 57,661,071 | 57,761,311 | 2 | 0 | 2 | 1 |
| Case 62 | 16 | 57,762,401 | 57,803,855 | 1 | 0 | 1 | 0 |
| Case 62 | 16 | 57,805,176 | 57,953,314 | 2 | 0 | 2 | 1 |
| Case 62 | 16 | 57,953,715 | 57,996,883 | 1 | 0 | 1 | 0 |
| Case 62 | 16 | 57,996,932 | 58,011,727 | 2 | 0 | 2 | 1 |
| Case 62 | 16 | 58,011,805 | 58,076,225 | 1 | 0 | 1 | 0 |
| Case 62 | 16 | 58,076,256 | 58,230,665 | 2 | 0 | 2 | 1 |
| Case 62 | 16 | 58,245,244 | 58,285,188 | 1 | 0 | 1 | 0 |
| Case 62 | 16 | 58,287,973 | 58,552,671 | 2 | 0 | 2 | 1 |
| Case 62 | 16 | 58,552,766 | 58,683,859 | 1 | 0 | 1 | 0 |
| Case 62 | 16 | 58,687,068 | 59,252,128 | 2 | 0 | 2 | 1 |
| Case 62 | 16 | 59,258,766 | 59,310,833 | 1 | 0 | 1 | 0 |
| Case 62 | 16 | 59,314,789 | 59,876,920 | 2 | 0 | 2 | 1 |
| Case 62 | 16 | 59,877,306 | 60,188,277 | 1 | 0 | 1 | 0 |
| Case 62 | 16 | 60,192,176 | 60,598,579 | 2 | 0 | 2 | 1 |
| Case 62 | 16 | 60,601,131 | 61,417,251 | 1 | 0 | 1 | 0 |
| Case 62 | 16 | 61,419,025 | 61,640,491 | 2 | 0 | 2 | 1 |
| Case 62 | 16 | 61,641,497 | 61,966,297 | 1 | 0 | 1 | 0 |
| Case 62 | 16 | 61,966,703 | 62,056,535 | 2 | 0 | 2 | 1 |
| Case 62 | 16 | 62,074,175 | 62,287,330 | 1 | 0 | 1 | 0 |
| Case 62 | 16 | 62,288,767 | 62,315,105 | 2 | 0 | 2 | 1 |
| Case 62 | 16 | 62,318,693 | 62,712,630 | 1 | 0 | 1 | 0 |
| Case 62 | 16 | 62,713,963 | 62,796,921 | 2 | 0 | 2 | 1 |
| Case 62 | 16 | 62,799,644 | 62,939,397 | 1 | 0 | 1 | 0 |
| Case 62 | 16 | 62,948,963 | 63,040,801 | 2 | 0 | 2 | 1 |
| Case 62 | 16 | 63,044,807 | 63,704,220 | 1 | 0 | 1 | 0 |
| Case 62 | 16 | 63,704,335 | 63,770,084 | 2 | 0 | 2 | 1 |
| Case 62 | 16 | 63,781,053 | 63,896,080 | 1 | 0 | 1 | 0 |
| Case 62 | 16 | 63,900,434 | 64,164,990 | 2 | 0 | 2 | 1 |
| Case 62 | 16 | 64,172,803 | 64,226,202 | 1 | 0 | 1 | 0 |
| Case 62 | 16 | 64,234,454 | 64,297,174 | 2 | 0 | 2 | 1 |
| Case 62 | 16 | 64,302,397 | 64,636,137 | 1 | 0 | 1 | 0 |
| Case 62 | 16 | 64,642,635 | 64,760,841 | 2 | 0 | 2 | 1 |
| Case 62 | 16 | 64,762,426 | 64,851,250 | 1 | 0 | 1 | 0 |
| Case 62 | 16 | 64,857,840 | 64,954,352 | 2 | 0 | 2 | 1 |
| Case 62 | 16 | 64,956,357 | 65,002,591 | 1 | 0 | 1 | 0 |
| Case 62 | 16 | 65,003,333 | 65,761,966 | 2 | 0 | 2 | 1 |
| Case 62 | 16 | 65,762,614 | 65,884,039 | 1 | 0 | 1 | 0 |
| Case 62 | 16 | 65,884,735 | 65,908,562 | 2 | 0 | 2 | 1 |
| Case 62 | 16 | 65,910,358 | 65,928,770 | 1 | 0 | 1 | 0 |
| Case 62 | 16 | 65,932,333 | 66,132,620 | 2 | 0 | 2 | 1 |
| Case 62 | 16 | 66,138,149 | 66,162,229 | 1 | 0 | 1 | 0 |
| Case 62 | 16 | 66,162,454 | 66,432,423 | 2 | 0 | 2 | 1 |
| Case 62 | 16 | 66,432,463 | 66,543,650 | 1 | 0 | 1 | 0 |
| Case 62 | 16 | 66,545,106 | 66,706,552 | 2 | 0 | 2 | 1 |
| Case 62 | 16 | 66,710,604 | 66,919,532 | 1 | 0 | 1 | 0 |
| Case 62 | 16 | 66,919,604 | 66,987,005 | 2 | 0 | 2 | 1 |

|         |    |            |            |   |   |   |   |
|---------|----|------------|------------|---|---|---|---|
| Case 62 | 16 | 66,992,693 | 66,997,784 | 1 | 0 | 1 | 0 |
| Case 62 | 16 | 66,997,813 | 67,037,054 | 2 | 0 | 2 | 1 |
| Case 62 | 16 | 67,037,064 | 67,247,444 | 1 | 0 | 1 | 0 |
| Case 62 | 16 | 67,248,831 | 67,265,650 | 2 | 0 | 2 | 1 |
| Case 62 | 16 | 67,265,662 | 67,426,869 | 1 | 0 | 1 | 0 |
| Case 62 | 16 | 67,432,123 | 67,516,288 | 2 | 0 | 2 | 1 |
| Case 62 | 16 | 67,516,562 | 67,769,093 | 1 | 0 | 1 | 0 |
| Case 62 | 16 | 67,770,724 | 67,866,444 | 2 | 0 | 2 | 1 |
| Case 62 | 16 | 67,867,696 | 67,927,124 | 1 | 0 | 1 | 0 |
| Case 62 | 16 | 67,927,697 | 67,979,061 | 2 | 0 | 2 | 1 |
| Case 62 | 16 | 67,979,422 | 68,262,958 | 1 | 0 | 1 | 0 |
| Case 62 | 16 | 68,264,209 | 68,546,472 | 2 | 0 | 2 | 1 |
| Case 62 | 16 | 68,548,595 | 68,641,388 | 1 | 0 | 1 | 0 |
| Case 62 | 16 | 68,645,111 | 68,729,785 | 2 | 0 | 2 | 1 |
| Case 62 | 16 | 68,732,169 | 69,337,091 | 1 | 0 | 1 | 0 |
| Case 62 | 16 | 69,341,781 | 69,588,572 | 2 | 0 | 2 | 1 |
| Case 62 | 16 | 69,590,366 | 69,737,908 | 1 | 0 | 1 | 0 |
| Case 62 | 16 | 69,738,727 | 69,778,916 | 2 | 0 | 2 | 1 |
| Case 62 | 16 | 69,782,153 | 70,289,695 | 1 | 0 | 1 | 0 |
| Case 62 | 16 | 70,289,725 | 70,303,580 | 2 | 0 | 2 | 1 |
| Case 62 | 16 | 70,303,659 | 70,721,883 | 1 | 0 | 1 | 0 |
| Case 62 | 16 | 70,722,940 | 71,286,676 | 2 | 0 | 2 | 1 |
| Case 62 | 16 | 71,292,172 | 71,348,191 | 1 | 0 | 1 | 0 |
| Case 62 | 16 | 71,350,049 | 71,682,921 | 2 | 0 | 2 | 1 |
| Case 62 | 16 | 71,682,971 | 71,964,175 | 1 | 0 | 1 | 0 |
| Case 62 | 16 | 71,965,196 | 73,502,212 | 2 | 0 | 2 | 1 |
| Case 62 | 16 | 73,503,894 | 73,604,279 | 1 | 0 | 1 | 0 |
| Case 62 | 16 | 73,606,282 | 73,986,771 | 2 | 0 | 2 | 1 |
| Case 62 | 16 | 73,993,052 | 74,686,166 | 1 | 0 | 1 | 0 |
| Case 62 | 16 | 74,694,972 | 74,792,859 | 2 | 0 | 2 | 1 |
| Case 62 | 16 | 74,796,993 | 75,270,760 | 1 | 0 | 1 | 0 |
| Case 62 | 16 | 75,270,782 | 75,390,532 | 2 | 0 | 2 | 1 |
| Case 62 | 16 | 75,397,009 | 75,484,241 | 1 | 0 | 1 | 0 |
| Case 62 | 16 | 75,485,566 | 75,904,514 | 2 | 0 | 2 | 1 |
| Case 62 | 16 | 75,922,170 | 75,955,368 | 1 | 0 | 1 | 0 |
| Case 62 | 16 | 75,959,617 | 76,043,201 | 2 | 0 | 2 | 1 |
| Case 62 | 16 | 76,054,131 | 76,116,063 | 1 | 0 | 1 | 0 |
| Case 62 | 16 | 76,125,310 | 76,249,497 | 2 | 0 | 2 | 1 |
| Case 62 | 16 | 76,252,388 | 76,592,552 | 1 | 0 | 1 | 0 |
| Case 62 | 16 | 76,592,633 | 76,621,240 | 2 | 0 | 2 | 1 |
| Case 62 | 16 | 76,629,660 | 76,859,126 | 1 | 0 | 1 | 0 |
| Case 62 | 16 | 76,862,808 | 76,994,785 | 2 | 0 | 2 | 1 |
| Case 62 | 16 | 76,998,464 | 77,040,159 | 1 | 0 | 1 | 0 |
| Case 62 | 16 | 77,041,957 | 77,325,303 | 2 | 0 | 2 | 1 |
| Case 62 | 16 | 77,325,325 | 77,443,168 | 1 | 0 | 1 | 0 |
| Case 62 | 16 | 77,443,453 | 77,533,772 | 2 | 0 | 2 | 1 |
| Case 62 | 16 | 77,535,643 | 77,692,030 | 1 | 0 | 1 | 0 |
| Case 62 | 16 | 77,694,091 | 77,759,136 | 2 | 0 | 2 | 1 |
| Case 62 | 16 | 77,759,357 | 77,766,640 | 1 | 0 | 1 | 0 |
| Case 62 | 16 | 77,767,491 | 77,769,881 | 2 | 0 | 2 | 1 |
| Case 62 | 16 | 77,775,459 | 77,783,508 | 1 | 0 | 1 | 0 |
| Case 62 | 16 | 77,783,580 | 78,055,941 | 2 | 0 | 2 | 1 |
| Case 62 | 16 | 78,056,542 | 78,201,753 | 1 | 0 | 1 | 0 |
| Case 62 | 16 | 78,204,334 | 78,371,002 | 2 | 0 | 2 | 1 |
| Case 62 | 16 | 78,386,295 | 78,405,271 | 1 | 0 | 1 | 0 |
| Case 62 | 16 | 78,409,180 | 78,497,817 | 2 | 0 | 2 | 1 |
| Case 62 | 16 | 78,499,470 | 78,548,574 | 1 | 0 | 1 | 0 |
| Case 62 | 16 | 78,549,995 | 78,569,070 | 2 | 0 | 2 | 1 |
| Case 62 | 16 | 78,569,957 | 78,661,327 | 1 | 0 | 1 | 0 |
| Case 62 | 16 | 78,663,258 | 79,053,995 | 2 | 0 | 2 | 1 |
| Case 62 | 16 | 79,054,020 | 79,072,952 | 1 | 0 | 1 | 0 |

|         |    |            |            |   |   |   |   |
|---------|----|------------|------------|---|---|---|---|
| Case 62 | 16 | 79,074,029 | 79,245,589 | 2 | 0 | 2 | 1 |
| Case 62 | 16 | 79,245,590 | 79,263,935 | 1 | 0 | 1 | 0 |
| Case 62 | 16 | 79,267,429 | 79,813,230 | 2 | 0 | 2 | 1 |
| Case 62 | 16 | 79,813,439 | 79,942,562 | 1 | 0 | 1 | 0 |
| Case 62 | 16 | 79,943,084 | 80,177,656 | 2 | 0 | 2 | 1 |
| Case 62 | 16 | 80,183,937 | 80,289,745 | 1 | 0 | 1 | 0 |
| Case 62 | 16 | 80,291,731 | 80,551,598 | 2 | 0 | 2 | 1 |
| Case 62 | 16 | 80,554,948 | 80,611,798 | 1 | 0 | 1 | 0 |
| Case 62 | 16 | 80,612,059 | 80,788,323 | 2 | 0 | 2 | 1 |
| Case 62 | 16 | 80,791,319 | 80,891,387 | 1 | 0 | 1 | 0 |
| Case 62 | 16 | 80,891,599 | 80,955,393 | 2 | 0 | 2 | 1 |
| Case 62 | 16 | 80,961,660 | 81,079,681 | 1 | 0 | 1 | 0 |
| Case 62 | 16 | 81,087,488 | 82,146,629 | 2 | 0 | 2 | 1 |
| Case 62 | 16 | 82,147,609 | 82,197,733 | 1 | 0 | 1 | 0 |
| Case 62 | 16 | 82,200,103 | 82,850,467 | 2 | 0 | 2 | 1 |
| Case 62 | 16 | 82,852,296 | 82,988,025 | 1 | 0 | 1 | 0 |
| Case 62 | 16 | 82,988,950 | 83,102,072 | 2 | 0 | 2 | 1 |
| Case 62 | 16 | 83,102,477 | 83,181,532 | 1 | 0 | 1 | 0 |
| Case 62 | 16 | 83,183,195 | 83,287,432 | 2 | 0 | 2 | 1 |
| Case 62 | 16 | 83,287,580 | 83,301,203 | 1 | 0 | 1 | 0 |
| Case 62 | 16 | 83,303,147 | 83,324,765 | 2 | 0 | 2 | 1 |
| Case 62 | 16 | 83,326,059 | 83,394,808 | 1 | 0 | 1 | 0 |
| Case 62 | 16 | 83,397,287 | 83,508,437 | 2 | 0 | 2 | 1 |
| Case 62 | 16 | 83,508,693 | 83,616,592 | 1 | 0 | 1 | 0 |
| Case 62 | 16 | 83,617,594 | 83,981,250 | 2 | 0 | 2 | 1 |
| Case 62 | 16 | 83,983,071 | 84,029,556 | 1 | 0 | 1 | 0 |
| Case 62 | 16 | 84,030,289 | 84,093,697 | 2 | 0 | 2 | 1 |
| Case 62 | 16 | 84,094,363 | 84,104,344 | 1 | 0 | 1 | 0 |
| Case 62 | 16 | 84,105,706 | 84,212,735 | 2 | 0 | 2 | 1 |
| Case 62 | 16 | 84,212,801 | 84,240,607 | 1 | 0 | 1 | 0 |
| Case 62 | 16 | 84,242,793 | 84,410,569 | 2 | 0 | 2 | 1 |
| Case 62 | 16 | 84,412,028 | 84,514,305 | 1 | 0 | 1 | 0 |
| Case 62 | 16 | 84,514,341 | 84,903,209 | 2 | 0 | 2 | 1 |
| Case 62 | 16 | 84,903,728 | 84,914,177 | 1 | 0 | 1 | 0 |
| Case 62 | 16 | 84,914,186 | 85,120,296 | 2 | 0 | 2 | 1 |
| Case 62 | 16 | 85,120,500 | 85,179,401 | 1 | 0 | 1 | 0 |
| Case 62 | 16 | 85,179,660 | 85,689,484 | 2 | 0 | 2 | 1 |
| Case 62 | 16 | 85,689,510 | 85,696,689 | 1 | 0 | 1 | 0 |
| Case 62 | 16 | 85,697,019 | 85,881,453 | 2 | 0 | 2 | 1 |
| Case 62 | 16 | 85,882,981 | 85,931,504 | 1 | 0 | 1 | 0 |
| Case 62 | 16 | 85,932,988 | 86,276,730 | 2 | 0 | 2 | 1 |
| Case 62 | 16 | 86,276,817 | 86,306,243 | 1 | 0 | 1 | 0 |
| Case 62 | 16 | 86,308,375 | 86,525,478 | 2 | 0 | 2 | 1 |
| Case 62 | 16 | 86,525,690 | 86,613,171 | 1 | 0 | 1 | 0 |
| Case 62 | 16 | 86,616,638 | 87,409,288 | 2 | 0 | 2 | 1 |
| Case 62 | 16 | 87,415,250 | 87,445,125 | 1 | 0 | 1 | 0 |
| Case 62 | 16 | 87,445,270 | 87,611,967 | 2 | 0 | 2 | 1 |
| Case 62 | 16 | 87,626,215 | 87,678,248 | 1 | 0 | 1 | 0 |
| Case 62 | 16 | 87,678,302 | 87,736,778 | 2 | 0 | 2 | 1 |
| Case 62 | 16 | 87,738,858 | 87,756,803 | 1 | 0 | 1 | 0 |
| Case 62 | 16 | 87,756,858 | 87,862,028 | 2 | 0 | 2 | 1 |
| Case 62 | 16 | 87,862,260 | 87,866,399 | 1 | 0 | 1 | 0 |
| Case 62 | 16 | 87,866,620 | 88,494,976 | 2 | 0 | 2 | 1 |
| Case 62 | 16 | 88,495,487 | 88,604,957 | 1 | 0 | 1 | 0 |
| Case 62 | 16 | 88,606,165 | 88,688,435 | 2 | 0 | 2 | 1 |
| Case 62 | 16 | 88,688,832 | 88,763,561 | 1 | 0 | 1 | 0 |
| Case 62 | 16 | 88,766,031 | 88,778,742 | 2 | 0 | 2 | 1 |
| Case 62 | 16 | 88,778,762 | 88,844,433 | 1 | 0 | 1 | 0 |
| Case 62 | 16 | 88,846,818 | 88,870,967 | 2 | 0 | 2 | 1 |
| Case 62 | 16 | 88,871,016 | 89,169,312 | 1 | 0 | 1 | 0 |
| Case 62 | 16 | 89,178,531 | 89,221,795 | 2 | 0 | 2 | 1 |

|         |    |            |            |   |   |   |   |
|---------|----|------------|------------|---|---|---|---|
| Case 62 | 16 | 89,234,948 | 89,385,561 | 1 | 0 | 1 | 0 |
| Case 62 | 16 | 89,386,808 | 89,612,398 | 2 | 0 | 2 | 1 |
| Case 62 | 16 | 89,613,037 | 89,708,096 | 1 | 0 | 1 | 0 |
| Case 62 | 16 | 89,708,224 | 89,737,329 | 2 | 0 | 2 | 1 |
| Case 62 | 16 | 89,737,463 | 89,815,152 | 1 | 0 | 1 | 0 |
| Case 62 | 16 | 89,818,491 | 89,865,610 | 2 | 0 | 2 | 1 |
| Case 62 | 16 | 89,866,043 | 90,106,910 | 1 | 0 | 1 | 0 |
| Case 62 | 16 | 90,108,832 | 90,115,731 | 2 | 0 | 2 | 1 |
| Case 62 | 16 | 90,121,131 | 90,274,695 | 1 | 0 | 1 | 0 |
| Case 62 | 17 | 11,885     | 1,281,864  | 1 | 0 | 1 | 0 |
| Case 62 | 17 | 1,282,979  | 2,202,749  | 2 | 0 | 2 | 1 |
| Case 62 | 17 | 2,202,836  | 2,641,288  | 1 | 0 | 1 | 0 |
| Case 62 | 17 | 2,646,348  | 2,701,998  | 2 | 0 | 2 | 1 |
| Case 62 | 17 | 2,702,161  | 2,754,856  | 1 | 0 | 1 | 0 |
| Case 62 | 17 | 2,758,657  | 2,918,626  | 2 | 0 | 2 | 1 |
| Case 62 | 17 | 2,920,124  | 3,436,058  | 1 | 0 | 1 | 0 |
| Case 62 | 17 | 3,436,060  | 3,505,233  | 2 | 0 | 2 | 1 |
| Case 62 | 17 | 3,506,043  | 3,793,303  | 1 | 0 | 1 | 0 |
| Case 62 | 17 | 3,793,447  | 3,840,727  | 2 | 0 | 2 | 1 |
| Case 62 | 17 | 3,840,797  | 4,069,735  | 1 | 0 | 1 | 0 |
| Case 62 | 17 | 4,072,571  | 4,083,242  | 2 | 0 | 2 | 1 |
| Case 62 | 17 | 4,085,567  | 4,500,190  | 1 | 0 | 1 | 0 |
| Case 62 | 17 | 4,500,503  | 4,512,515  | 2 | 0 | 2 | 1 |
| Case 62 | 17 | 4,514,780  | 4,694,337  | 1 | 0 | 1 | 0 |
| Case 62 | 17 | 4,699,552  | 4,924,141  | 2 | 0 | 2 | 1 |
| Case 62 | 17 | 4,925,481  | 5,110,426  | 1 | 0 | 1 | 0 |
| Case 62 | 17 | 5,113,423  | 5,126,689  | 2 | 0 | 2 | 1 |
| Case 62 | 17 | 5,136,476  | 5,322,955  | 1 | 0 | 1 | 0 |
| Case 62 | 17 | 5,323,228  | 5,354,077  | 2 | 0 | 2 | 1 |
| Case 62 | 17 | 5,354,204  | 5,559,733  | 1 | 0 | 1 | 0 |
| Case 62 | 17 | 5,566,089  | 5,602,894  | 2 | 0 | 2 | 1 |
| Case 62 | 17 | 5,607,859  | 5,759,090  | 1 | 0 | 1 | 0 |
| Case 62 | 17 | 5,762,634  | 5,836,860  | 2 | 0 | 2 | 1 |
| Case 62 | 17 | 5,838,802  | 6,355,677  | 1 | 0 | 1 | 0 |
| Case 62 | 17 | 6,361,788  | 6,380,520  | 2 | 0 | 2 | 1 |
| Case 62 | 17 | 6,381,357  | 6,459,079  | 1 | 0 | 1 | 0 |
| Case 62 | 17 | 6,463,075  | 6,493,207  | 2 | 0 | 2 | 1 |
| Case 62 | 17 | 6,493,209  | 6,555,534  | 1 | 0 | 1 | 0 |
| Case 62 | 17 | 6,556,326  | 6,590,098  | 2 | 0 | 2 | 1 |
| Case 62 | 17 | 6,591,067  | 7,662,434  | 1 | 0 | 1 | 0 |
| Case 62 | 17 | 7,662,437  | 7,673,930  | 2 | 0 | 2 | 1 |
| Case 62 | 17 | 7,674,139  | 7,984,203  | 1 | 0 | 1 | 0 |
| Case 62 | 17 | 7,984,478  | 7,994,694  | 2 | 0 | 2 | 1 |
| Case 62 | 17 | 7,996,640  | 8,007,650  | 1 | 0 | 1 | 0 |
| Case 62 | 17 | 8,010,164  | 8,021,608  | 2 | 0 | 2 | 1 |
| Case 62 | 17 | 8,022,065  | 8,700,986  | 1 | 0 | 1 | 0 |
| Case 62 | 17 | 8,701,094  | 8,702,099  | 2 | 0 | 2 | 1 |
| Case 62 | 17 | 8,702,137  | 9,058,214  | 1 | 0 | 1 | 0 |
| Case 62 | 17 | 9,060,026  | 9,100,040  | 2 | 0 | 2 | 1 |
| Case 62 | 17 | 9,109,972  | 9,792,937  | 1 | 0 | 1 | 0 |
| Case 62 | 17 | 9,801,417  | 9,820,739  | 2 | 0 | 2 | 1 |
| Case 62 | 17 | 9,821,376  | 9,932,525  | 1 | 0 | 1 | 0 |
| Case 62 | 17 | 9,932,724  | 10,031,090 | 2 | 0 | 2 | 1 |
| Case 62 | 17 | 10,036,796 | 10,215,944 | 1 | 0 | 1 | 0 |
| Case 62 | 17 | 10,215,956 | 10,251,811 | 2 | 0 | 2 | 1 |
| Case 62 | 17 | 10,253,908 | 10,625,803 | 1 | 0 | 1 | 0 |
| Case 62 | 17 | 10,628,364 | 10,791,443 | 2 | 0 | 2 | 1 |
| Case 62 | 17 | 10,794,640 | 11,119,194 | 1 | 0 | 1 | 0 |
| Case 62 | 17 | 11,121,723 | 11,184,066 | 2 | 0 | 2 | 1 |
| Case 62 | 17 | 11,185,157 | 11,593,434 | 1 | 0 | 1 | 0 |
| Case 62 | 17 | 11,593,505 | 11,608,475 | 0 | 0 | 0 | 0 |



|         |    |            |            |   |   |   |   |
|---------|----|------------|------------|---|---|---|---|
| Case 62 | 17 | 11,620,993 | 11,833,226 | 1 | 0 | 1 | 0 |
| Case 62 | 17 | 11,833,287 | 11,865,462 | 2 | 0 | 2 | 1 |
| Case 62 | 17 | 11,866,891 | 12,547,725 | 1 | 0 | 1 | 0 |
| Case 62 | 17 | 12,549,476 | 12,639,294 | 2 | 0 | 2 | 1 |
| Case 62 | 17 | 12,639,505 | 12,814,654 | 1 | 0 | 1 | 0 |
| Case 62 | 17 | 12,816,330 | 12,887,379 | 2 | 0 | 2 | 1 |
| Case 62 | 17 | 12,888,157 | 13,234,204 | 1 | 0 | 1 | 0 |
| Case 62 | 17 | 13,237,647 | 13,262,287 | 2 | 0 | 2 | 1 |
| Case 62 | 17 | 13,265,561 | 13,887,484 | 1 | 0 | 1 | 0 |
| Case 62 | 17 | 13,888,821 | 13,949,962 | 2 | 0 | 2 | 1 |
| Case 62 | 17 | 13,954,351 | 15,361,941 | 1 | 0 | 1 | 0 |
| Case 62 | 17 | 15,366,712 | 15,407,763 | 2 | 0 | 2 | 1 |
| Case 62 | 17 | 15,412,038 | 16,866,254 | 1 | 0 | 1 | 0 |
| Case 62 | 17 | 16,877,083 | 17,122,418 | 2 | 0 | 2 | 1 |
| Case 62 | 17 | 17,122,436 | 18,181,601 | 1 | 0 | 1 | 0 |
| Case 62 | 17 | 18,181,667 | 18,194,242 | 2 | 0 | 2 | 1 |
| Case 62 | 17 | 18,194,248 | 18,220,101 | 1 | 0 | 1 | 0 |
| Case 62 | 17 | 18,220,133 | 18,231,998 | 2 | 0 | 2 | 1 |
| Case 62 | 17 | 18,232,518 | 20,865,108 | 1 | 0 | 1 | 0 |
| Case 62 | 17 | 20,866,865 | 20,911,910 | 2 | 0 | 2 | 1 |
| Case 62 | 17 | 20,914,156 | 21,284,223 | 1 | 0 | 1 | 0 |
| Case 62 | 17 | 21,285,926 | 21,319,909 | 2 | 0 | 2 | 1 |
| Case 62 | 17 | 21,319,912 | 22,242,355 | 1 | 0 | 1 | 0 |
| Case 62 | 17 | 25,268,142 | 34,436,708 | 1 | 1 | 2 | 0 |
| Case 62 | 17 | 34,443,811 | 34,597,521 | 2 | 1 | 3 | 0 |
| Case 62 | 17 | 34,815,551 | 41,645,244 | 1 | 1 | 2 | 0 |
| Case 62 | 17 | 41,652,878 | 41,760,392 | 2 | 1 | 3 | 0 |
| Case 62 | 17 | 41,764,995 | 43,935,838 | 1 | 1 | 2 | 0 |
| Case 62 | 17 | 43,938,470 | 45,542,735 | 1 | 0 | 1 | 0 |
| Case 62 | 17 | 45,633,376 | 79,983,359 | 1 | 1 | 2 | 0 |
| Case 62 | 17 | 79,983,365 | 80,040,534 | 2 | 1 | 3 | 0 |
| Case 62 | 17 | 80,040,820 | 80,159,457 | 1 | 1 | 2 | 0 |
| Case 62 | 17 | 80,159,796 | 80,402,326 | 2 | 1 | 3 | 0 |
| Case 62 | 17 | 80,402,350 | 81,060,040 | 1 | 1 | 2 | 0 |
| Case 62 | 18 | 87,505     | 15,375,878 | 1 | 1 | 2 | 0 |
| Case 62 | 18 | 18,520,354 | 20,602,153 | 1 | 1 | 2 | 0 |
| Case 62 | 18 | 20,606,122 | 20,709,123 | 2 | 1 | 3 | 0 |
| Case 62 | 18 | 20,716,414 | 78,015,180 | 1 | 1 | 2 | 0 |
| Case 62 | 19 | 260,912    | 3,730,617  | 1 | 0 | 1 | 0 |
| Case 62 | 19 | 3,731,847  | 3,735,918  | 2 | 0 | 2 | 1 |
| Case 62 | 19 | 3,736,189  | 4,944,771  | 1 | 0 | 1 | 0 |
| Case 62 | 19 | 4,945,974  | 5,037,415  | 2 | 0 | 2 | 1 |
| Case 62 | 19 | 5,039,135  | 5,925,687  | 1 | 0 | 1 | 0 |
| Case 62 | 19 | 5,925,689  | 9,741,216  | 1 | 1 | 2 | 0 |
| Case 62 | 19 | 9,764,192  | 10,124,190 | 1 | 0 | 1 | 0 |
| Case 62 | 19 | 10,124,253 | 10,172,516 | 2 | 0 | 2 | 1 |
| Case 62 | 19 | 10,176,663 | 10,206,662 | 1 | 0 | 1 | 0 |
| Case 62 | 19 | 10,213,154 | 12,733,864 | 1 | 1 | 2 | 0 |
| Case 62 | 19 | 12,738,543 | 13,049,948 | 1 | 0 | 1 | 0 |
| Case 62 | 19 | 13,050,026 | 13,059,006 | 1 | 1 | 2 | 0 |
| Case 62 | 19 | 13,059,147 | 15,365,067 | 2 | 1 | 3 | 0 |
| Case 62 | 19 | 15,366,205 | 15,492,848 | 1 | 1 | 2 | 0 |
| Case 62 | 19 | 15,501,297 | 17,179,789 | 2 | 1 | 3 | 0 |
| Case 62 | 19 | 17,180,812 | 18,054,468 | 1 | 0 | 1 | 0 |
| Case 62 | 19 | 18,054,851 | 18,095,769 | 2 | 0 | 2 | 1 |
| Case 62 | 19 | 18,101,830 | 18,123,617 | 1 | 0 | 1 | 0 |
| Case 62 | 19 | 18,123,738 | 18,167,003 | 2 | 0 | 2 | 1 |
| Case 62 | 19 | 18,168,674 | 19,824,850 | 1 | 0 | 1 | 0 |
| Case 62 | 19 | 19,842,053 | 19,862,553 | 2 | 0 | 2 | 1 |
| Case 62 | 19 | 19,863,014 | 22,503,203 | 1 | 0 | 1 | 0 |
| Case 62 | 19 | 22,512,477 | 22,537,862 | 2 | 0 | 2 | 1 |

|         |    |            |            |   |   |   |   |
|---------|----|------------|------------|---|---|---|---|
| Case 62 | 19 | 22,538,650 | 24,629,285 | 1 | 0 | 1 | 0 |
| Case 62 | 19 | 27,732,159 | 27,801,814 | 1 | 0 | 1 | 0 |
| Case 62 | 19 | 27,828,664 | 28,101,122 | 2 | 1 | 3 | 0 |
| Case 62 | 19 | 28,127,201 | 41,341,589 | 1 | 1 | 2 | 0 |
| Case 62 | 19 | 41,350,895 | 41,379,148 | 1 | 0 | 1 | 0 |
| Case 62 | 19 | 41,382,476 | 46,307,979 | 1 | 1 | 2 | 0 |
| Case 62 | 19 | 46,308,217 | 46,332,420 | 2 | 1 | 3 | 0 |
| Case 62 | 19 | 46,333,349 | 59,097,160 | 1 | 1 | 2 | 0 |
| Case 62 | 20 | 63,244     | 2,035,775  | 2 | 1 | 3 | 0 |
| Case 62 | 20 | 2,037,867  | 2,201,257  | 2 | 0 | 2 | 1 |
| Case 62 | 20 | 2,204,811  | 15,237,052 | 2 | 1 | 3 | 0 |
| Case 62 | 20 | 15,241,763 | 15,292,533 | 2 | 0 | 2 | 1 |
| Case 62 | 20 | 15,295,797 | 15,321,706 | 2 | 1 | 3 | 0 |
| Case 62 | 20 | 15,325,461 | 15,424,659 | 3 | 1 | 4 | 0 |
| Case 62 | 20 | 15,428,111 | 15,514,898 | 2 | 1 | 3 | 0 |
| Case 62 | 20 | 15,520,791 | 15,914,464 | 1 | 1 | 2 | 0 |
| Case 62 | 20 | 15,916,192 | 23,016,706 | 2 | 1 | 3 | 0 |
| Case 62 | 20 | 23,016,757 | 23,034,274 | 1 | 1 | 2 | 0 |
| Case 62 | 20 | 23,034,556 | 26,293,985 | 2 | 1 | 3 | 0 |
| Case 62 | 20 | 29,425,357 | 31,659,917 | 2 | 1 | 3 | 0 |
| Case 62 | 20 | 31,660,543 | 31,673,846 | 1 | 1 | 2 | 0 |
| Case 62 | 20 | 31,673,875 | 34,268,711 | 2 | 1 | 3 | 0 |
| Case 62 | 20 | 34,269,225 | 34,467,215 | 3 | 1 | 4 | 0 |
| Case 62 | 20 | 34,482,534 | 48,925,139 | 2 | 1 | 3 | 0 |
| Case 62 | 20 | 48,928,971 | 48,962,438 | 3 | 1 | 4 | 0 |
| Case 62 | 20 | 48,969,024 | 60,699,715 | 2 | 1 | 3 | 0 |
| Case 62 | 20 | 60,704,910 | 60,808,666 | 1 | 1 | 2 | 0 |
| Case 62 | 20 | 60,809,812 | 60,866,789 | 2 | 1 | 3 | 0 |
| Case 62 | 20 | 60,866,804 | 60,897,465 | 1 | 1 | 2 | 0 |
| Case 62 | 20 | 60,897,721 | 61,818,750 | 2 | 1 | 3 | 0 |
| Case 62 | 20 | 61,821,068 | 61,895,920 | 1 | 1 | 2 | 0 |
| Case 62 | 20 | 61,900,305 | 62,196,807 | 2 | 1 | 3 | 0 |
| Case 62 | 20 | 62,196,819 | 62,372,798 | 1 | 1 | 2 | 0 |
| Case 62 | 20 | 62,372,813 | 62,577,613 | 2 | 1 | 3 | 0 |
| Case 62 | 20 | 62,577,807 | 62,658,384 | 1 | 1 | 2 | 0 |
| Case 62 | 20 | 62,662,515 | 62,884,613 | 2 | 1 | 3 | 0 |
| Case 62 | 20 | 62,886,216 | 62,948,788 | 1 | 1 | 2 | 0 |
| Case 62 | 21 | 10,827,533 | 10,971,337 | 1 | 1 | 2 | 0 |
| Case 62 | 21 | 14,368,320 | 14,779,379 | 1 | 1 | 2 | 0 |
| Case 62 | 21 | 14,795,475 | 22,726,557 | 1 | 0 | 1 | 0 |
| Case 62 | 21 | 22,727,138 | 22,762,779 | 2 | 0 | 2 | 1 |
| Case 62 | 21 | 22,763,676 | 29,486,008 | 1 | 0 | 1 | 0 |
| Case 62 | 21 | 29,495,146 | 30,088,081 | 0 | 0 | 0 | 0 |
| Case 62 | 21 | 30,095,754 | 31,720,887 | 1 | 0 | 1 | 0 |
| Case 62 | 21 | 31,720,905 | 31,802,759 | 1 | 1 | 2 | 0 |
| Case 62 | 21 | 31,802,768 | 31,858,866 | 2 | 1 | 3 | 0 |
| Case 62 | 21 | 31,859,574 | 32,389,498 | 1 | 1 | 2 | 0 |
| Case 62 | 21 | 32,390,078 | 32,462,981 | 2 | 1 | 3 | 0 |
| Case 62 | 21 | 32,471,849 | 32,999,423 | 1 | 1 | 2 | 0 |
| Case 62 | 21 | 32,999,554 | 33,372,446 | 2 | 1 | 3 | 0 |
| Case 62 | 21 | 33,372,749 | 34,020,653 | 3 | 1 | 4 | 0 |
| Case 62 | 21 | 34,020,786 | 34,125,319 | 2 | 1 | 3 | 0 |
| Case 62 | 21 | 34,137,026 | 34,325,436 | 1 | 1 | 2 | 0 |
| Case 62 | 21 | 34,327,012 | 34,435,619 | 2 | 1 | 3 | 0 |
| Case 62 | 21 | 34,435,878 | 34,828,044 | 1 | 1 | 2 | 0 |
| Case 62 | 21 | 34,828,050 | 35,366,219 | 2 | 1 | 3 | 0 |
| Case 62 | 21 | 35,369,681 | 35,397,502 | 3 | 1 | 4 | 0 |
| Case 62 | 21 | 35,401,734 | 35,595,821 | 2 | 1 | 3 | 0 |
| Case 62 | 21 | 35,598,406 | 35,712,696 | 1 | 1 | 2 | 0 |
| Case 62 | 21 | 35,715,717 | 35,897,768 | 2 | 1 | 3 | 0 |
| Case 62 | 21 | 35,899,876 | 36,030,215 | 3 | 1 | 4 | 0 |

|         |    |            |            |   |   |   |   |
|---------|----|------------|------------|---|---|---|---|
| Case 62 | 21 | 36,039,584 | 36,057,929 | 2 | 1 | 3 | 0 |
| Case 62 | 21 | 36,059,609 | 36,413,739 | 1 | 0 | 1 | 0 |
| Case 62 | 21 | 36,415,087 | 36,543,928 | 2 | 0 | 2 | 1 |
| Case 62 | 21 | 36,547,998 | 36,664,377 | 1 | 0 | 1 | 0 |
| Case 62 | 21 | 36,666,340 | 36,700,822 | 2 | 0 | 2 | 1 |
| Case 62 | 21 | 36,702,489 | 37,018,857 | 1 | 0 | 1 | 0 |
| Case 62 | 21 | 37,031,398 | 37,073,437 | 2 | 0 | 2 | 1 |
| Case 62 | 21 | 37,075,862 | 37,313,095 | 1 | 0 | 1 | 0 |
| Case 62 | 21 | 37,321,101 | 37,375,643 | 2 | 0 | 2 | 1 |
| Case 62 | 21 | 37,381,848 | 37,837,930 | 1 | 0 | 1 | 0 |
| Case 62 | 21 | 37,839,410 | 37,881,829 | 2 | 0 | 2 | 1 |
| Case 62 | 21 | 37,882,963 | 37,940,863 | 1 | 0 | 1 | 0 |
| Case 62 | 21 | 37,941,317 | 38,015,220 | 2 | 0 | 2 | 1 |
| Case 62 | 21 | 38,017,529 | 38,308,911 | 1 | 0 | 1 | 0 |
| Case 62 | 21 | 38,309,028 | 38,429,389 | 2 | 0 | 2 | 1 |
| Case 62 | 21 | 38,432,621 | 38,889,975 | 1 | 0 | 1 | 0 |
| Case 62 | 21 | 38,894,401 | 38,934,599 | 2 | 0 | 2 | 1 |
| Case 62 | 21 | 38,936,128 | 39,060,893 | 1 | 0 | 1 | 0 |
| Case 62 | 21 | 39,065,630 | 39,220,245 | 2 | 0 | 2 | 1 |
| Case 62 | 21 | 39,223,338 | 39,492,405 | 1 | 0 | 1 | 0 |
| Case 62 | 21 | 39,492,443 | 39,574,665 | 2 | 0 | 2 | 1 |
| Case 62 | 21 | 39,576,807 | 39,891,105 | 1 | 0 | 1 | 0 |
| Case 62 | 21 | 39,891,572 | 39,904,064 | 2 | 0 | 2 | 1 |
| Case 62 | 21 | 39,906,065 | 40,453,036 | 1 | 0 | 1 | 0 |
| Case 62 | 21 | 40,455,048 | 40,499,244 | 2 | 0 | 2 | 1 |
| Case 62 | 21 | 40,499,467 | 40,941,498 | 1 | 0 | 1 | 0 |
| Case 62 | 21 | 40,942,788 | 40,977,826 | 2 | 0 | 2 | 1 |
| Case 62 | 21 | 40,980,238 | 41,008,956 | 1 | 0 | 1 | 0 |
| Case 62 | 21 | 41,010,801 | 41,102,931 | 2 | 0 | 2 | 1 |
| Case 62 | 21 | 41,104,348 | 41,295,166 | 1 | 0 | 1 | 0 |
| Case 62 | 21 | 41,295,673 | 41,334,028 | 2 | 0 | 2 | 1 |
| Case 62 | 21 | 41,334,960 | 41,416,163 | 1 | 0 | 1 | 0 |
| Case 62 | 21 | 41,417,215 | 41,457,598 | 2 | 0 | 2 | 1 |
| Case 62 | 21 | 41,457,618 | 41,599,867 | 1 | 0 | 1 | 0 |
| Case 62 | 21 | 41,601,422 | 41,622,294 | 2 | 0 | 2 | 1 |
| Case 62 | 21 | 41,628,089 | 41,845,401 | 1 | 0 | 1 | 0 |
| Case 62 | 21 | 41,847,881 | 41,937,830 | 2 | 0 | 2 | 1 |
| Case 62 | 21 | 41,940,803 | 42,086,175 | 1 | 0 | 1 | 0 |
| Case 62 | 21 | 42,089,378 | 42,183,983 | 2 | 0 | 2 | 1 |
| Case 62 | 21 | 42,185,860 | 43,092,201 | 1 | 0 | 1 | 0 |
| Case 62 | 21 | 43,093,894 | 43,105,136 | 2 | 0 | 2 | 1 |
| Case 62 | 21 | 43,107,623 | 43,312,993 | 1 | 0 | 1 | 0 |
| Case 62 | 21 | 43,314,414 | 43,319,984 | 2 | 0 | 2 | 1 |
| Case 62 | 21 | 43,321,283 | 43,437,886 | 1 | 0 | 1 | 0 |
| Case 62 | 21 | 43,438,674 | 43,449,936 | 2 | 0 | 2 | 1 |
| Case 62 | 21 | 43,451,246 | 43,556,335 | 1 | 0 | 1 | 0 |
| Case 62 | 21 | 43,556,691 | 43,615,559 | 2 | 0 | 2 | 1 |
| Case 62 | 21 | 43,616,325 | 44,025,886 | 1 | 0 | 1 | 0 |
| Case 62 | 21 | 44,026,143 | 44,072,445 | 2 | 0 | 2 | 1 |
| Case 62 | 21 | 44,077,237 | 45,115,488 | 1 | 0 | 1 | 0 |
| Case 62 | 21 | 45,116,042 | 45,175,958 | 2 | 0 | 2 | 1 |
| Case 62 | 21 | 45,176,621 | 45,214,581 | 1 | 0 | 1 | 0 |
| Case 62 | 21 | 45,215,046 | 45,357,301 | 2 | 0 | 2 | 1 |
| Case 62 | 21 | 45,357,730 | 46,178,687 | 1 | 0 | 1 | 0 |
| Case 62 | 21 | 46,181,009 | 46,191,174 | 2 | 0 | 2 | 1 |
| Case 62 | 21 | 46,191,256 | 46,684,904 | 1 | 0 | 1 | 0 |
| Case 62 | 21 | 46,685,470 | 46,839,625 | 2 | 0 | 2 | 1 |
| Case 62 | 21 | 46,839,904 | 47,298,515 | 1 | 0 | 1 | 0 |
| Case 62 | 21 | 47,300,385 | 47,362,224 | 2 | 0 | 2 | 1 |
| Case 62 | 21 | 47,362,573 | 48,100,155 | 1 | 0 | 1 | 0 |
| Case 62 | 22 | 16,114,244 | 17,619,023 | 1 | 0 | 1 | 0 |

|         |    |            |            |   |   |   |   |
|---------|----|------------|------------|---|---|---|---|
| Case 62 | 22 | 17,619,076 | 17,661,178 | 2 | 0 | 2 | 1 |
| Case 62 | 22 | 17,661,791 | 17,690,318 | 1 | 0 | 1 | 0 |
| Case 62 | 22 | 17,690,374 | 17,785,199 | 2 | 0 | 2 | 1 |
| Case 62 | 22 | 17,789,010 | 17,897,544 | 1 | 0 | 1 | 0 |
| Case 62 | 22 | 17,899,136 | 17,961,525 | 2 | 0 | 2 | 1 |
| Case 62 | 22 | 17,965,531 | 18,022,052 | 1 | 0 | 1 | 0 |
| Case 62 | 22 | 18,022,060 | 18,031,817 | 2 | 0 | 2 | 1 |
| Case 62 | 22 | 18,033,199 | 18,533,434 | 1 | 0 | 1 | 0 |
| Case 62 | 22 | 18,539,370 | 18,549,641 | 2 | 0 | 2 | 1 |
| Case 62 | 22 | 18,551,780 | 19,999,760 | 1 | 0 | 1 | 0 |
| Case 62 | 22 | 20,004,704 | 20,037,315 | 2 | 0 | 2 | 1 |
| Case 62 | 22 | 20,039,867 | 21,800,277 | 1 | 0 | 1 | 0 |
| Case 62 | 22 | 21,800,578 | 21,973,319 | 2 | 0 | 2 | 1 |
| Case 62 | 22 | 21,976,934 | 22,806,795 | 1 | 0 | 1 | 0 |
| Case 62 | 22 | 22,840,280 | 23,258,369 | 2 | 0 | 2 | 1 |
| Case 62 | 22 | 23,259,859 | 24,107,054 | 1 | 0 | 1 | 0 |
| Case 62 | 22 | 24,108,977 | 24,175,759 | 2 | 0 | 2 | 1 |
| Case 62 | 22 | 24,176,053 | 24,237,074 | 1 | 0 | 1 | 0 |
| Case 62 | 22 | 24,240,340 | 24,257,337 | 2 | 0 | 2 | 1 |
| Case 62 | 22 | 24,260,743 | 24,992,266 | 1 | 0 | 1 | 0 |
| Case 62 | 22 | 24,996,630 | 25,112,325 | 2 | 0 | 2 | 1 |
| Case 62 | 22 | 25,113,562 | 25,215,305 | 1 | 0 | 1 | 0 |
| Case 62 | 22 | 25,217,740 | 25,231,422 | 2 | 0 | 2 | 1 |
| Case 62 | 22 | 25,231,570 | 25,294,369 | 1 | 0 | 1 | 0 |
| Case 62 | 22 | 25,294,399 | 25,439,882 | 2 | 0 | 2 | 1 |
| Case 62 | 22 | 25,440,392 | 25,904,257 | 1 | 0 | 1 | 0 |
| Case 62 | 22 | 25,905,668 | 25,925,760 | 2 | 0 | 2 | 1 |
| Case 62 | 22 | 25,928,620 | 26,623,274 | 1 | 0 | 1 | 0 |
| Case 62 | 22 | 26,628,105 | 26,640,849 | 2 | 0 | 2 | 1 |
| Case 62 | 22 | 26,641,081 | 26,966,602 | 1 | 0 | 1 | 0 |
| Case 62 | 22 | 26,968,506 | 27,046,685 | 2 | 0 | 2 | 1 |
| Case 62 | 22 | 27,047,254 | 27,195,033 | 1 | 0 | 1 | 0 |
| Case 62 | 22 | 27,198,719 | 27,245,963 | 2 | 0 | 2 | 1 |
| Case 62 | 22 | 27,249,884 | 27,287,323 | 1 | 0 | 1 | 0 |
| Case 62 | 22 | 27,290,892 | 27,331,206 | 2 | 0 | 2 | 1 |
| Case 62 | 22 | 27,331,661 | 27,475,512 | 1 | 0 | 1 | 0 |
| Case 62 | 22 | 27,475,606 | 27,497,704 | 2 | 0 | 2 | 1 |
| Case 62 | 22 | 27,502,567 | 27,653,397 | 1 | 0 | 1 | 0 |
| Case 62 | 22 | 27,655,945 | 27,708,852 | 2 | 0 | 2 | 1 |
| Case 62 | 22 | 27,710,703 | 27,819,250 | 1 | 0 | 1 | 0 |
| Case 62 | 22 | 27,819,961 | 27,882,282 | 2 | 0 | 2 | 1 |
| Case 62 | 22 | 27,886,736 | 28,032,457 | 1 | 0 | 1 | 0 |
| Case 62 | 22 | 28,033,628 | 28,188,203 | 2 | 0 | 2 | 1 |
| Case 62 | 22 | 28,192,982 | 31,011,330 | 1 | 0 | 1 | 0 |
| Case 62 | 22 | 31,011,350 | 31,017,322 | 2 | 0 | 2 | 1 |
| Case 62 | 22 | 31,018,975 | 32,547,484 | 1 | 0 | 1 | 0 |
| Case 62 | 22 | 32,554,860 | 32,600,915 | 2 | 0 | 2 | 1 |
| Case 62 | 22 | 32,602,718 | 33,044,995 | 1 | 0 | 1 | 0 |
| Case 62 | 22 | 33,046,628 | 33,131,486 | 2 | 0 | 2 | 1 |
| Case 62 | 22 | 33,132,579 | 33,188,545 | 1 | 0 | 1 | 0 |
| Case 62 | 22 | 33,191,373 | 33,228,070 | 2 | 0 | 2 | 1 |
| Case 62 | 22 | 33,229,830 | 33,272,699 | 1 | 0 | 1 | 0 |
| Case 62 | 22 | 33,274,336 | 33,426,247 | 2 | 0 | 2 | 1 |
| Case 62 | 22 | 33,429,320 | 33,864,817 | 1 | 0 | 1 | 0 |
| Case 62 | 22 | 33,866,854 | 34,008,430 | 2 | 0 | 2 | 1 |
| Case 62 | 22 | 34,009,001 | 34,098,417 | 1 | 0 | 1 | 0 |
| Case 62 | 22 | 34,102,803 | 34,225,482 | 2 | 0 | 2 | 1 |
| Case 62 | 22 | 34,226,592 | 34,236,578 | 1 | 0 | 1 | 0 |
| Case 62 | 22 | 34,238,131 | 34,275,560 | 2 | 0 | 2 | 1 |
| Case 62 | 22 | 34,276,698 | 35,534,130 | 1 | 0 | 1 | 0 |
| Case 62 | 22 | 35,537,036 | 35,568,399 | 2 | 0 | 2 | 1 |

|         |    |            |            |   |   |   |   |
|---------|----|------------|------------|---|---|---|---|
| Case 62 | 22 | 35,569,422 | 35,907,880 | 1 | 0 | 1 | 0 |
| Case 62 | 22 | 35,913,976 | 36,003,053 | 2 | 0 | 2 | 1 |
| Case 62 | 22 | 36,003,390 | 36,519,040 | 1 | 0 | 1 | 0 |
| Case 62 | 22 | 36,524,873 | 36,537,327 | 2 | 0 | 2 | 1 |
| Case 62 | 22 | 36,537,432 | 36,727,551 | 1 | 0 | 1 | 0 |
| Case 62 | 22 | 36,730,947 | 36,804,282 | 2 | 0 | 2 | 1 |
| Case 62 | 22 | 36,818,662 | 36,900,186 | 1 | 0 | 1 | 0 |
| Case 62 | 22 | 36,900,230 | 37,136,986 | 2 | 0 | 2 | 1 |
| Case 62 | 22 | 37,140,797 | 38,991,393 | 1 | 0 | 1 | 0 |
| Case 62 | 22 | 38,993,302 | 39,069,510 | 2 | 0 | 2 | 1 |
| Case 62 | 22 | 39,076,587 | 39,176,987 | 1 | 0 | 1 | 0 |
| Case 62 | 22 | 39,178,693 | 39,220,908 | 2 | 0 | 2 | 1 |
| Case 62 | 22 | 39,222,512 | 39,320,828 | 1 | 0 | 1 | 0 |
| Case 62 | 22 | 39,322,264 | 39,355,109 | 2 | 0 | 2 | 1 |
| Case 62 | 22 | 39,355,572 | 39,496,417 | 1 | 0 | 1 | 0 |
| Case 62 | 22 | 39,497,287 | 39,520,815 | 2 | 0 | 2 | 1 |
| Case 62 | 22 | 39,522,940 | 41,759,326 | 1 | 0 | 1 | 0 |
| Case 62 | 22 | 41,760,512 | 41,791,536 | 2 | 0 | 2 | 1 |
| Case 62 | 22 | 41,792,282 | 44,512,124 | 1 | 0 | 1 | 0 |
| Case 62 | 22 | 44,513,473 | 44,555,444 | 2 | 0 | 2 | 1 |
| Case 62 | 22 | 44,557,063 | 44,779,303 | 1 | 0 | 1 | 0 |
| Case 62 | 22 | 44,780,466 | 44,798,646 | 2 | 0 | 2 | 1 |
| Case 62 | 22 | 44,804,192 | 45,190,750 | 1 | 0 | 1 | 0 |
| Case 62 | 22 | 45,191,504 | 45,231,883 | 2 | 0 | 2 | 1 |
| Case 62 | 22 | 45,235,303 | 45,258,467 | 1 | 0 | 1 | 0 |
| Case 62 | 22 | 45,258,539 | 45,454,275 | 2 | 0 | 2 | 1 |
| Case 62 | 22 | 45,454,839 | 45,633,373 | 1 | 0 | 1 | 0 |
| Case 62 | 22 | 45,634,738 | 45,746,097 | 2 | 0 | 2 | 1 |
| Case 62 | 22 | 45,749,862 | 47,998,771 | 1 | 0 | 1 | 0 |
| Case 62 | 22 | 48,005,830 | 48,027,389 | 2 | 0 | 2 | 1 |
| Case 62 | 22 | 48,027,448 | 48,431,959 | 1 | 0 | 1 | 0 |
| Case 62 | 22 | 48,434,062 | 48,453,666 | 0 | 0 | 0 | 0 |
| Case 62 | 22 | 48,454,426 | 48,730,913 | 1 | 0 | 1 | 0 |
| Case 62 | 22 | 48,739,642 | 48,766,050 | 2 | 0 | 2 | 1 |
| Case 62 | 22 | 48,766,791 | 49,746,915 | 1 | 0 | 1 | 0 |
| Case 62 | 22 | 49,749,712 | 49,776,121 | 2 | 0 | 2 | 1 |
| Case 62 | 22 | 49,777,195 | 49,849,024 | 1 | 0 | 1 | 0 |
| Case 62 | 22 | 49,851,212 | 49,911,908 | 2 | 0 | 2 | 1 |
| Case 62 | 22 | 49,912,406 | 51,195,728 | 1 | 0 | 1 | 0 |
| Case 63 | 1  | 82,154     | 1,213,305  | 2 | 1 | 3 | 0 |
| Case 63 | 1  | 1,216,848  | 1,268,352  | 1 | 1 | 2 | 0 |
| Case 63 | 1  | 1,268,362  | 7,237,086  | 2 | 1 | 3 | 0 |
| Case 63 | 1  | 7,240,456  | 8,516,238  | 3 | 1 | 4 | 0 |
| Case 63 | 1  | 8,522,553  | 10,924,710 | 2 | 1 | 3 | 0 |
| Case 63 | 1  | 10,929,928 | 12,277,967 | 3 | 1 | 4 | 0 |
| Case 63 | 1  | 12,278,932 | 20,142,434 | 2 | 1 | 3 | 0 |
| Case 63 | 1  | 20,142,681 | 20,296,319 | 3 | 1 | 4 | 0 |
| Case 63 | 1  | 20,300,544 | 25,881,403 | 2 | 1 | 3 | 0 |
| Case 63 | 1  | 25,883,750 | 26,403,098 | 3 | 1 | 4 | 0 |
| Case 63 | 1  | 26,411,918 | 40,286,005 | 2 | 1 | 3 | 0 |
| Case 63 | 1  | 40,288,051 | 40,628,364 | 2 | 2 | 4 | 0 |
| Case 63 | 1  | 40,628,822 | 45,671,736 | 2 | 1 | 3 | 0 |
| Case 63 | 1  | 45,671,808 | 45,896,779 | 3 | 1 | 4 | 0 |
| Case 63 | 1  | 45,903,488 | 46,073,362 | 2 | 2 | 4 | 0 |
| Case 63 | 1  | 46,073,451 | 46,487,710 | 2 | 1 | 3 | 0 |
| Case 63 | 1  | 46,488,914 | 47,533,321 | 3 | 1 | 4 | 0 |
| Case 63 | 1  | 47,548,974 | 85,625,855 | 2 | 1 | 3 | 0 |
| Case 63 | 1  | 85,634,847 | 85,947,200 | 2 | 2 | 4 | 0 |
| Case 63 | 1  | 85,951,597 | 87,877,540 | 2 | 1 | 3 | 0 |
| Case 63 | 1  | 87,877,672 | 88,494,859 | 3 | 1 | 4 | 0 |
| Case 63 | 1  | 88,504,370 | 94,514,466 | 2 | 1 | 3 | 0 |

|         |   |             |             |   |   |   |   |
|---------|---|-------------|-------------|---|---|---|---|
| Case 63 | 1 | 94,514,475  | 95,116,072  | 3 | 1 | 4 | 0 |
| Case 63 | 1 | 95,116,807  | 113,040,277 | 2 | 1 | 3 | 0 |
| Case 63 | 1 | 113,040,421 | 113,597,564 | 3 | 1 | 4 | 0 |
| Case 63 | 1 | 113,601,445 | 121,346,616 | 2 | 1 | 3 | 0 |
| Case 63 | 1 | 142,649,718 | 143,767,629 | 2 | 1 | 3 | 0 |
| Case 63 | 1 | 143,978,807 | 145,702,497 | 2 | 2 | 4 | 0 |
| Case 63 | 1 | 145,703,115 | 147,354,030 | 3 | 2 | 5 | 0 |
| Case 63 | 1 | 147,355,294 | 150,664,077 | 2 | 2 | 4 | 0 |
| Case 63 | 1 | 150,667,169 | 150,856,153 | 3 | 2 | 5 | 0 |
| Case 63 | 1 | 150,857,555 | 151,694,626 | 2 | 2 | 4 | 0 |
| Case 63 | 1 | 151,696,875 | 152,058,767 | 3 | 2 | 5 | 0 |
| Case 63 | 1 | 152,059,046 | 152,128,790 | 3 | 1 | 4 | 0 |
| Case 63 | 1 | 152,128,886 | 152,191,007 | 4 | 1 | 5 | 0 |
| Case 63 | 1 | 152,191,022 | 152,281,745 | 3 | 1 | 4 | 0 |
| Case 63 | 1 | 152,281,796 | 153,346,263 | 2 | 2 | 4 | 0 |
| Case 63 | 1 | 153,347,062 | 153,650,443 | 3 | 2 | 5 | 0 |
| Case 63 | 1 | 153,652,129 | 159,535,626 | 2 | 2 | 4 | 0 |
| Case 63 | 1 | 159,537,141 | 159,710,517 | 3 | 2 | 5 | 0 |
| Case 63 | 1 | 159,713,556 | 159,932,319 | 2 | 2 | 4 | 0 |
| Case 63 | 1 | 159,933,136 | 160,129,557 | 3 | 2 | 5 | 0 |
| Case 63 | 1 | 160,131,429 | 180,251,983 | 2 | 2 | 4 | 0 |
| Case 63 | 1 | 180,254,865 | 181,225,293 | 3 | 2 | 5 | 0 |
| Case 63 | 1 | 181,227,661 | 184,868,383 | 2 | 2 | 4 | 0 |
| Case 63 | 1 | 184,878,307 | 185,849,364 | 3 | 2 | 5 | 0 |
| Case 63 | 1 | 185,855,289 | 187,093,377 | 2 | 2 | 4 | 0 |
| Case 63 | 1 | 187,095,959 | 187,362,820 | 3 | 2 | 5 | 0 |
| Case 63 | 1 | 187,363,393 | 192,129,537 | 2 | 2 | 4 | 0 |
| Case 63 | 1 | 192,136,366 | 192,548,439 | 3 | 2 | 5 | 0 |
| Case 63 | 1 | 192,548,543 | 192,796,532 | 3 | 1 | 4 | 0 |
| Case 63 | 1 | 192,800,241 | 193,227,537 | 2 | 2 | 4 | 0 |
| Case 63 | 1 | 193,236,656 | 193,710,196 | 3 | 2 | 5 | 0 |
| Case 63 | 1 | 193,711,172 | 199,801,373 | 2 | 2 | 4 | 0 |
| Case 63 | 1 | 199,804,080 | 200,182,664 | 3 | 2 | 5 | 0 |
| Case 63 | 1 | 200,182,788 | 200,974,729 | 2 | 2 | 4 | 0 |
| Case 63 | 1 | 200,974,888 | 200,974,888 | 2 | 1 | 3 | 0 |
| Case 63 | 1 | 200,977,949 | 203,055,101 | 3 | 1 | 4 | 0 |
| Case 63 | 1 | 203,058,842 | 216,649,667 | 2 | 1 | 3 | 0 |
| Case 63 | 1 | 216,650,304 | 216,707,012 | 1 | 1 | 2 | 0 |
| Case 63 | 1 | 216,707,519 | 246,251,363 | 2 | 1 | 3 | 0 |
| Case 63 | 1 | 246,261,526 | 246,441,421 | 1 | 1 | 2 | 0 |
| Case 63 | 1 | 246,443,337 | 249,218,992 | 2 | 1 | 3 | 0 |
| Case 63 | 2 | 18,674      | 573,207     | 2 | 1 | 3 | 0 |
| Case 63 | 2 | 578,204     | 672,863     | 4 | 1 | 5 | 0 |
| Case 63 | 2 | 674,297     | 26,613,329  | 2 | 1 | 3 | 0 |
| Case 63 | 2 | 26,618,389  | 27,361,246  | 3 | 1 | 4 | 0 |
| Case 63 | 2 | 27,362,371  | 27,393,030  | 4 | 1 | 5 | 0 |
| Case 63 | 2 | 27,418,974  | 28,205,581  | 2 | 1 | 3 | 0 |
| Case 63 | 2 | 28,224,116  | 29,213,408  | 4 | 1 | 5 | 0 |
| Case 63 | 2 | 29,213,689  | 29,325,271  | 4 | 0 | 4 | 1 |
| Case 63 | 2 | 29,335,758  | 29,447,108  | 2 | 1 | 3 | 0 |
| Case 63 | 2 | 29,448,419  | 29,619,971  | 4 | 1 | 5 | 0 |
| Case 63 | 2 | 29,624,193  | 38,282,332  | 2 | 1 | 3 | 0 |
| Case 63 | 2 | 38,290,916  | 38,687,498  | 2 | 2 | 4 | 0 |
| Case 63 | 2 | 38,692,619  | 42,690,878  | 2 | 1 | 3 | 0 |
| Case 63 | 2 | 42,690,881  | 43,751,480  | 2 | 2 | 4 | 0 |
| Case 63 | 2 | 43,752,382  | 44,291,333  | 2 | 1 | 3 | 0 |
| Case 63 | 2 | 44,304,047  | 44,428,390  | 2 | 0 | 2 | 1 |
| Case 63 | 2 | 44,428,808  | 50,176,965  | 2 | 1 | 3 | 0 |
| Case 63 | 2 | 50,179,975  | 50,318,462  | 4 | 1 | 5 | 0 |
| Case 63 | 2 | 50,318,584  | 92,081,640  | 2 | 1 | 3 | 0 |
| Case 63 | 2 | 95,429,424  | 105,820,133 | 2 | 1 | 3 | 0 |

|         |   |             |             |   |   |   |   |
|---------|---|-------------|-------------|---|---|---|---|
| Case 63 | 2 | 105,832,193 | 105,977,776 | 3 | 1 | 4 | 0 |
| Case 63 | 2 | 105,979,506 | 106,610,454 | 4 | 1 | 5 | 0 |
| Case 63 | 2 | 106,612,731 | 122,288,029 | 2 | 1 | 3 | 0 |
| Case 63 | 2 | 122,316,046 | 122,966,970 | 3 | 1 | 4 | 0 |
| Case 63 | 2 | 122,970,146 | 159,700,075 | 2 | 1 | 3 | 0 |
| Case 63 | 2 | 159,723,506 | 159,809,860 | 4 | 1 | 5 | 0 |
| Case 63 | 2 | 159,810,691 | 160,175,310 | 2 | 1 | 3 | 0 |
| Case 63 | 2 | 160,181,398 | 163,723,667 | 3 | 1 | 4 | 0 |
| Case 63 | 2 | 163,738,632 | 163,739,189 | 1 | 1 | 2 | 0 |
| Case 63 | 2 | 163,751,698 | 170,356,065 | 3 | 1 | 4 | 0 |
| Case 63 | 2 | 170,359,113 | 170,368,695 | 2 | 2 | 4 | 0 |
| Case 63 | 2 | 170,371,159 | 170,537,675 | 3 | 2 | 5 | 0 |
| Case 63 | 2 | 170,549,452 | 173,245,780 | 3 | 1 | 4 | 0 |
| Case 63 | 2 | 173,249,050 | 173,585,237 | 4 | 1 | 5 | 0 |
| Case 63 | 2 | 173,589,876 | 195,651,706 | 3 | 1 | 4 | 0 |
| Case 63 | 2 | 195,663,691 | 195,691,309 | 1 | 1 | 2 | 0 |
| Case 63 | 2 | 195,698,234 | 195,993,600 | 1 | 0 | 1 | 0 |
| Case 63 | 2 | 196,002,614 | 196,002,614 | 1 | 1 | 2 | 0 |
| Case 63 | 2 | 196,008,240 | 214,117,303 | 3 | 1 | 4 | 0 |
| Case 63 | 2 | 214,117,958 | 214,174,786 | 1 | 1 | 2 | 0 |
| Case 63 | 2 | 214,204,924 | 234,229,395 | 3 | 1 | 4 | 0 |
| Case 63 | 2 | 234,229,468 | 234,573,896 | 5 | 0 | 5 | 1 |
| Case 63 | 2 | 234,578,693 | 242,509,638 | 3 | 1 | 4 | 0 |
| Case 63 | 2 | 242,509,687 | 242,795,942 | 3 | 0 | 3 | 1 |
| Case 63 | 2 | 242,809,415 | 243,048,760 | 3 | 1 | 4 | 0 |
| Case 63 | 3 | 61,495      | 4,477,911   | 1 | 1 | 2 | 0 |
| Case 63 | 3 | 4,486,303   | 4,699,950   | 1 | 0 | 1 | 0 |
| Case 63 | 3 | 4,704,816   | 4,785,230   | 1 | 1 | 2 | 0 |
| Case 63 | 3 | 4,786,040   | 14,042,534  | 2 | 1 | 3 | 0 |
| Case 63 | 3 | 14,048,394  | 31,708,743  | 1 | 1 | 2 | 0 |
| Case 63 | 3 | 31,712,393  | 31,743,907  | 2 | 1 | 3 | 0 |
| Case 63 | 3 | 31,744,041  | 32,691,140  | 1 | 1 | 2 | 0 |
| Case 63 | 3 | 32,699,422  | 33,166,039  | 2 | 1 | 3 | 0 |
| Case 63 | 3 | 33,167,853  | 42,180,651  | 1 | 1 | 2 | 0 |
| Case 63 | 3 | 42,184,173  | 43,074,492  | 2 | 1 | 3 | 0 |
| Case 63 | 3 | 43,080,370  | 47,316,842  | 1 | 1 | 2 | 0 |
| Case 63 | 3 | 47,316,887  | 47,672,915  | 2 | 1 | 3 | 0 |
| Case 63 | 3 | 47,701,611  | 51,943,333  | 1 | 1 | 2 | 0 |
| Case 63 | 3 | 51,962,081  | 52,557,693  | 2 | 1 | 3 | 0 |
| Case 63 | 3 | 52,557,705  | 60,461,994  | 1 | 1 | 2 | 0 |
| Case 63 | 3 | 60,464,275  | 60,557,852  | 1 | 0 | 1 | 0 |
| Case 63 | 3 | 60,559,047  | 60,788,842  | 1 | 1 | 2 | 0 |
| Case 63 | 3 | 60,792,282  | 61,453,255  | 1 | 0 | 1 | 0 |
| Case 63 | 3 | 61,454,724  | 73,399,384  | 1 | 1 | 2 | 0 |
| Case 63 | 3 | 73,400,018  | 73,461,683  | 2 | 1 | 3 | 0 |
| Case 63 | 3 | 73,462,623  | 90,442,925  | 1 | 1 | 2 | 0 |
| Case 63 | 3 | 93,537,290  | 155,725,030 | 3 | 1 | 4 | 0 |
| Case 63 | 3 | 155,726,800 | 155,907,740 | 4 | 1 | 5 | 0 |
| Case 63 | 3 | 155,929,451 | 182,616,549 | 3 | 1 | 4 | 0 |
| Case 63 | 3 | 182,618,124 | 182,736,304 | 2 | 2 | 4 | 0 |
| Case 63 | 3 | 182,737,953 | 183,204,923 | 3 | 2 | 5 | 0 |
| Case 63 | 3 | 183,204,997 | 183,562,662 | 3 | 1 | 4 | 0 |
| Case 63 | 3 | 183,566,942 | 184,129,172 | 2 | 2 | 4 | 0 |
| Case 63 | 3 | 184,131,031 | 184,155,408 | 3 | 2 | 5 | 0 |
| Case 63 | 3 | 184,157,645 | 187,446,313 | 3 | 1 | 4 | 0 |
| Case 63 | 3 | 187,446,845 | 187,456,755 | 2 | 2 | 4 | 0 |
| Case 63 | 3 | 187,459,088 | 187,800,184 | 3 | 2 | 5 | 0 |
| Case 63 | 3 | 187,802,669 | 194,603,569 | 3 | 1 | 4 | 0 |
| Case 63 | 3 | 194,612,501 | 194,957,947 | 5 | 0 | 5 | 1 |
| Case 63 | 3 | 194,975,720 | 195,609,162 | 3 | 1 | 4 | 0 |
| Case 63 | 3 | 195,609,808 | 195,968,819 | 2 | 2 | 4 | 0 |

|         |   |             |             |   |   |   |   |
|---------|---|-------------|-------------|---|---|---|---|
| Case 63 | 3 | 195,973,244 | 196,005,444 | 3 | 2 | 5 | 0 |
| Case 63 | 3 | 196,007,493 | 197,838,262 | 3 | 1 | 4 | 0 |
| Case 63 | 4 | 71,566      | 37,486,417  | 1 | 1 | 2 | 0 |
| Case 63 | 4 | 37,492,758  | 37,849,004  | 2 | 1 | 3 | 0 |
| Case 63 | 4 | 37,850,188  | 49,620,898  | 1 | 1 | 2 | 0 |
| Case 63 | 4 | 52,697,856  | 71,024,376  | 1 | 1 | 2 | 0 |
| Case 63 | 4 | 71,024,451  | 71,024,552  | 0 | 0 | 0 | 0 |
| Case 63 | 4 | 71,025,548  | 71,339,723  | 1 | 1 | 2 | 0 |
| Case 63 | 4 | 71,346,606  | 71,767,788  | 2 | 1 | 3 | 0 |
| Case 63 | 4 | 71,768,930  | 79,048,490  | 1 | 1 | 2 | 0 |
| Case 63 | 4 | 79,052,851  | 79,747,281  | 2 | 1 | 3 | 0 |
| Case 63 | 4 | 79,763,578  | 87,514,712  | 1 | 1 | 2 | 0 |
| Case 63 | 4 | 87,517,609  | 91,123,874  | 2 | 1 | 3 | 0 |
| Case 63 | 4 | 91,154,964  | 91,336,936  | 1 | 1 | 2 | 0 |
| Case 63 | 4 | 91,340,668  | 92,066,776  | 2 | 1 | 3 | 0 |
| Case 63 | 4 | 92,076,288  | 92,179,229  | 2 | 0 | 2 | 1 |
| Case 63 | 4 | 92,184,080  | 100,171,379 | 2 | 1 | 3 | 0 |
| Case 63 | 4 | 100,178,151 | 100,243,009 | 1 | 1 | 2 | 0 |
| Case 63 | 4 | 100,243,932 | 105,838,702 | 2 | 1 | 3 | 0 |
| Case 63 | 4 | 105,844,273 | 106,125,715 | 3 | 1 | 4 | 0 |
| Case 63 | 4 | 106,137,033 | 179,337,999 | 2 | 1 | 3 | 0 |
| Case 63 | 4 | 179,339,480 | 179,424,481 | 2 | 2 | 4 | 0 |
| Case 63 | 4 | 179,426,861 | 190,963,766 | 2 | 1 | 3 | 0 |
| Case 63 | 5 | 38,139      | 2,866,246   | 5 | 1 | 6 | 0 |
| Case 63 | 5 | 2,866,346   | 3,086,514   | 6 | 1 | 7 | 0 |
| Case 63 | 5 | 3,086,934   | 3,086,934   | 2 | 0 | 2 | 1 |
| Case 63 | 5 | 3,088,781   | 11,597,332  | 5 | 1 | 6 | 0 |
| Case 63 | 5 | 11,599,392  | 13,604,919  | 6 | 1 | 7 | 0 |
| Case 63 | 5 | 13,604,996  | 13,604,996  | 2 | 0 | 2 | 1 |
| Case 63 | 5 | 13,609,659  | 16,952,807  | 5 | 1 | 6 | 0 |
| Case 63 | 5 | 16,961,453  | 31,073,148  | 6 | 1 | 7 | 0 |
| Case 63 | 5 | 31,075,755  | 31,075,755  | 2 | 0 | 2 | 1 |
| Case 63 | 5 | 31,076,540  | 35,545,908  | 5 | 1 | 6 | 0 |
| Case 63 | 5 | 35,548,874  | 35,739,960  | 6 | 1 | 7 | 0 |
| Case 63 | 5 | 35,740,256  | 35,740,256  | 2 | 0 | 2 | 1 |
| Case 63 | 5 | 35,740,257  | 38,267,136  | 5 | 1 | 6 | 0 |
| Case 63 | 5 | 38,270,279  | 40,597,618  | 6 | 1 | 7 | 0 |
| Case 63 | 5 | 40,603,203  | 40,603,203  | 2 | 0 | 2 | 1 |
| Case 63 | 5 | 40,607,910  | 41,203,190  | 5 | 1 | 6 | 0 |
| Case 63 | 5 | 41,203,322  | 46,399,093  | 6 | 1 | 7 | 0 |
| Case 63 | 5 | 49,457,282  | 54,349,842  | 2 | 0 | 2 | 1 |
| Case 63 | 5 | 54,370,089  | 54,527,306  | 3 | 0 | 3 | 1 |
| Case 63 | 5 | 54,527,316  | 55,149,235  | 2 | 0 | 2 | 1 |
| Case 63 | 5 | 55,155,402  | 55,236,367  | 3 | 0 | 3 | 1 |
| Case 63 | 5 | 55,236,374  | 55,568,321  | 2 | 0 | 2 | 1 |
| Case 63 | 5 | 55,568,487  | 56,457,598  | 3 | 0 | 3 | 1 |
| Case 63 | 5 | 56,471,790  | 56,592,647  | 2 | 0 | 2 | 1 |
| Case 63 | 5 | 56,595,262  | 56,930,116  | 3 | 0 | 3 | 1 |
| Case 63 | 5 | 56,930,563  | 59,225,762  | 2 | 0 | 2 | 1 |
| Case 63 | 5 | 59,226,625  | 59,242,522  | 1 | 1 | 2 | 0 |
| Case 63 | 5 | 59,249,174  | 59,371,938  | 0 | 0 | 0 | 0 |
| Case 63 | 5 | 59,398,304  | 59,515,334  | 1 | 1 | 2 | 0 |
| Case 63 | 5 | 59,517,876  | 60,759,524  | 2 | 0 | 2 | 1 |
| Case 63 | 5 | 60,768,550  | 61,227,527  | 3 | 0 | 3 | 1 |
| Case 63 | 5 | 61,239,182  | 65,349,887  | 2 | 0 | 2 | 1 |
| Case 63 | 5 | 65,349,908  | 65,837,538  | 3 | 0 | 3 | 1 |
| Case 63 | 5 | 65,849,279  | 66,799,242  | 2 | 0 | 2 | 1 |
| Case 63 | 5 | 66,799,452  | 68,278,990  | 3 | 0 | 3 | 1 |
| Case 63 | 5 | 68,279,398  | 71,002,954  | 2 | 0 | 2 | 1 |
| Case 63 | 5 | 71,006,645  | 71,495,805  | 3 | 0 | 3 | 1 |
| Case 63 | 5 | 71,496,159  | 71,743,322  | 2 | 0 | 2 | 1 |



|         |   |             |             |   |   |   |   |
|---------|---|-------------|-------------|---|---|---|---|
| Case 63 | 5 | 71,743,954  | 71,860,727  | 3 | 0 | 3 | 1 |
| Case 63 | 5 | 71,863,336  | 72,407,538  | 2 | 0 | 2 | 1 |
| Case 63 | 5 | 72,408,246  | 72,847,601  | 3 | 0 | 3 | 1 |
| Case 63 | 5 | 72,848,297  | 73,187,660  | 2 | 0 | 2 | 1 |
| Case 63 | 5 | 73,188,022  | 73,951,733  | 3 | 0 | 3 | 1 |
| Case 63 | 5 | 73,954,619  | 74,239,784  | 2 | 0 | 2 | 1 |
| Case 63 | 5 | 74,239,864  | 74,281,643  | 3 | 0 | 3 | 1 |
| Case 63 | 5 | 74,289,069  | 75,778,642  | 2 | 0 | 2 | 1 |
| Case 63 | 5 | 75,779,471  | 75,917,720  | 3 | 0 | 3 | 1 |
| Case 63 | 5 | 75,918,738  | 76,029,192  | 2 | 0 | 2 | 1 |
| Case 63 | 5 | 76,029,200  | 76,264,982  | 3 | 0 | 3 | 1 |
| Case 63 | 5 | 76,265,035  | 76,642,311  | 2 | 0 | 2 | 1 |
| Case 63 | 5 | 76,644,510  | 76,726,202  | 3 | 0 | 3 | 1 |
| Case 63 | 5 | 76,728,039  | 76,788,039  | 2 | 0 | 2 | 1 |
| Case 63 | 5 | 76,789,265  | 77,290,902  | 3 | 0 | 3 | 1 |
| Case 63 | 5 | 77,292,714  | 79,383,276  | 2 | 0 | 2 | 1 |
| Case 63 | 5 | 79,392,193  | 79,615,589  | 3 | 0 | 3 | 1 |
| Case 63 | 5 | 79,616,083  | 80,207,733  | 2 | 0 | 2 | 1 |
| Case 63 | 5 | 80,211,574  | 80,446,168  | 3 | 0 | 3 | 1 |
| Case 63 | 5 | 80,449,911  | 94,360,291  | 2 | 0 | 2 | 1 |
| Case 63 | 5 | 94,363,349  | 94,576,946  | 3 | 0 | 3 | 1 |
| Case 63 | 5 | 94,578,715  | 95,617,095  | 2 | 0 | 2 | 1 |
| Case 63 | 5 | 95,619,141  | 96,011,023  | 3 | 0 | 3 | 1 |
| Case 63 | 5 | 96,017,956  | 97,449,146  | 2 | 0 | 2 | 1 |
| Case 63 | 5 | 97,468,211  | 97,827,290  | 3 | 0 | 3 | 1 |
| Case 63 | 5 | 97,836,794  | 110,402,755 | 2 | 0 | 2 | 1 |
| Case 63 | 5 | 110,404,185 | 115,642,513 | 2 | 1 | 3 | 0 |
| Case 63 | 5 | 115,643,769 | 115,727,838 | 2 | 0 | 2 | 1 |
| Case 63 | 5 | 115,731,448 | 119,771,119 | 2 | 1 | 3 | 0 |
| Case 63 | 5 | 119,771,549 | 119,940,108 | 4 | 1 | 5 | 0 |
| Case 63 | 5 | 119,950,084 | 123,525,965 | 2 | 1 | 3 | 0 |
| Case 63 | 5 | 123,534,021 | 123,801,827 | 2 | 2 | 4 | 0 |
| Case 63 | 5 | 123,802,605 | 126,942,773 | 2 | 1 | 3 | 0 |
| Case 63 | 5 | 126,943,278 | 127,212,228 | 3 | 1 | 4 | 0 |
| Case 63 | 5 | 127,218,995 | 139,930,726 | 2 | 1 | 3 | 0 |
| Case 63 | 5 | 139,930,736 | 139,931,384 | 1 | 1 | 2 | 0 |
| Case 63 | 5 | 139,931,607 | 139,931,740 | 0 | 0 | 0 | 0 |
| Case 63 | 5 | 139,936,760 | 139,936,823 | 1 | 1 | 2 | 0 |
| Case 63 | 5 | 139,936,825 | 172,179,584 | 2 | 1 | 3 | 0 |
| Case 63 | 5 | 172,188,213 | 172,213,709 | 4 | 0 | 4 | 1 |
| Case 63 | 5 | 172,216,133 | 172,248,631 | 6 | 0 | 6 | 1 |
| Case 63 | 5 | 172,250,261 | 180,693,127 | 2 | 1 | 3 | 0 |
| Case 63 | 6 | 108,666     | 13,561,042  | 2 | 1 | 3 | 0 |
| Case 63 | 6 | 13,562,277  | 14,515,168  | 2 | 2 | 4 | 0 |
| Case 63 | 6 | 14,517,404  | 22,865,377  | 2 | 1 | 3 | 0 |
| Case 63 | 6 | 22,868,767  | 22,907,994  | 4 | 1 | 5 | 0 |
| Case 63 | 6 | 22,911,301  | 23,031,210  | 5 | 1 | 6 | 0 |
| Case 63 | 6 | 23,031,437  | 23,318,780  | 4 | 2 | 6 | 0 |
| Case 63 | 6 | 23,320,045  | 23,380,034  | 4 | 1 | 5 | 0 |
| Case 63 | 6 | 23,380,783  | 28,824,958  | 2 | 1 | 3 | 0 |
| Case 63 | 6 | 28,826,262  | 29,031,142  | 3 | 1 | 4 | 0 |
| Case 63 | 6 | 29,033,053  | 29,394,926  | 4 | 1 | 5 | 0 |
| Case 63 | 6 | 29,394,949  | 29,525,591  | 4 | 0 | 4 | 1 |
| Case 63 | 6 | 29,526,940  | 29,760,029  | 4 | 1 | 5 | 0 |
| Case 63 | 6 | 29,760,462  | 29,761,516  | 3 | 1 | 4 | 0 |
| Case 63 | 6 | 29,761,835  | 30,252,836  | 5 | 0 | 5 | 1 |
| Case 63 | 6 | 30,253,011  | 30,423,117  | 4 | 0 | 4 | 1 |
| Case 63 | 6 | 30,423,223  | 30,455,886  | 4 | 1 | 5 | 0 |
| Case 63 | 6 | 30,455,920  | 30,932,309  | 4 | 0 | 4 | 1 |
| Case 63 | 6 | 30,932,532  | 31,091,862  | 4 | 1 | 5 | 0 |
| Case 63 | 6 | 31,091,992  | 31,112,701  | 3 | 1 | 4 | 0 |

|         |   |             |             |   |   |   |   |
|---------|---|-------------|-------------|---|---|---|---|
| Case 63 | 6 | 31,112,737  | 31,238,259  | 4 | 1 | 5 | 0 |
| Case 63 | 6 | 31,239,417  | 31,382,893  | 4 | 0 | 4 | 1 |
| Case 63 | 6 | 31,383,071  | 31,532,814  | 4 | 1 | 5 | 0 |
| Case 63 | 6 | 31,533,378  | 32,026,808  | 4 | 0 | 4 | 1 |
| Case 63 | 6 | 32,029,180  | 32,171,288  | 3 | 1 | 4 | 0 |
| Case 63 | 6 | 32,171,632  | 32,413,317  | 4 | 1 | 5 | 0 |
| Case 63 | 6 | 32,413,459  | 32,511,672  | 4 | 0 | 4 | 1 |
| Case 63 | 6 | 32,546,879  | 32,805,470  | 4 | 1 | 5 | 0 |
| Case 63 | 6 | 32,805,568  | 32,822,186  | 4 | 0 | 4 | 1 |
| Case 63 | 6 | 32,822,269  | 32,899,485  | 4 | 1 | 5 | 0 |
| Case 63 | 6 | 32,900,018  | 32,961,361  | 3 | 1 | 4 | 0 |
| Case 63 | 6 | 32,961,387  | 33,026,110  | 4 | 1 | 5 | 0 |
| Case 63 | 6 | 33,026,246  | 33,057,659  | 3 | 1 | 4 | 0 |
| Case 63 | 6 | 33,057,711  | 33,139,662  | 4 | 1 | 5 | 0 |
| Case 63 | 6 | 33,140,009  | 33,427,350  | 3 | 1 | 4 | 0 |
| Case 63 | 6 | 33,429,672  | 33,533,404  | 4 | 1 | 5 | 0 |
| Case 63 | 6 | 33,534,880  | 35,980,134  | 4 | 0 | 4 | 1 |
| Case 63 | 6 | 35,980,712  | 36,248,957  | 4 | 1 | 5 | 0 |
| Case 63 | 6 | 36,252,839  | 36,348,689  | 3 | 1 | 4 | 0 |
| Case 63 | 6 | 36,348,800  | 37,098,379  | 4 | 1 | 5 | 0 |
| Case 63 | 6 | 37,102,822  | 37,257,787  | 3 | 1 | 4 | 0 |
| Case 63 | 6 | 37,284,550  | 40,308,360  | 4 | 1 | 5 | 0 |
| Case 63 | 6 | 40,310,573  | 40,536,128  | 4 | 0 | 4 | 1 |
| Case 63 | 6 | 40,540,482  | 40,949,933  | 4 | 1 | 5 | 0 |
| Case 63 | 6 | 40,959,427  | 41,314,114  | 3 | 1 | 4 | 0 |
| Case 63 | 6 | 41,318,424  | 41,504,126  | 4 | 1 | 5 | 0 |
| Case 63 | 6 | 41,519,522  | 41,908,122  | 3 | 1 | 4 | 0 |
| Case 63 | 6 | 41,910,064  | 42,048,690  | 4 | 1 | 5 | 0 |
| Case 63 | 6 | 42,050,823  | 42,237,177  | 4 | 0 | 4 | 1 |
| Case 63 | 6 | 42,240,369  | 42,618,068  | 4 | 1 | 5 | 0 |
| Case 63 | 6 | 42,620,234  | 43,396,325  | 4 | 0 | 4 | 1 |
| Case 63 | 6 | 43,396,856  | 43,409,418  | 4 | 1 | 5 | 0 |
| Case 63 | 6 | 43,409,627  | 43,487,552  | 3 | 1 | 4 | 0 |
| Case 63 | 6 | 43,487,816  | 43,970,487  | 5 | 0 | 5 | 1 |
| Case 63 | 6 | 43,970,658  | 44,250,281  | 4 | 0 | 4 | 1 |
| Case 63 | 6 | 44,253,749  | 44,275,011  | 3 | 1 | 4 | 0 |
| Case 63 | 6 | 44,278,069  | 49,655,649  | 4 | 1 | 5 | 0 |
| Case 63 | 6 | 49,656,252  | 49,753,706  | 3 | 1 | 4 | 0 |
| Case 63 | 6 | 49,753,726  | 50,664,180  | 4 | 1 | 5 | 0 |
| Case 63 | 6 | 50,664,995  | 52,050,353  | 3 | 1 | 4 | 0 |
| Case 63 | 6 | 52,050,493  | 52,055,293  | 2 | 2 | 4 | 0 |
| Case 63 | 6 | 52,055,339  | 52,399,247  | 3 | 2 | 5 | 0 |
| Case 63 | 6 | 52,399,307  | 54,962,103  | 3 | 1 | 4 | 0 |
| Case 63 | 6 | 54,965,717  | 55,223,750  | 4 | 1 | 5 | 0 |
| Case 63 | 6 | 55,223,868  | 57,217,336  | 3 | 1 | 4 | 0 |
| Case 63 | 6 | 57,227,695  | 58,055,927  | 2 | 1 | 3 | 0 |
| Case 63 | 6 | 58,150,777  | 58,741,497  | 3 | 1 | 4 | 0 |
| Case 63 | 6 | 58,752,089  | 58,752,089  | 1 | 1 | 2 | 0 |
| Case 63 | 6 | 61,891,118  | 77,000,660  | 1 | 1 | 2 | 0 |
| Case 63 | 6 | 77,020,141  | 77,024,665  | 0 | 0 | 0 | 0 |
| Case 63 | 6 | 77,059,064  | 108,558,280 | 1 | 1 | 2 | 0 |
| Case 63 | 6 | 108,561,974 | 132,910,710 | 2 | 1 | 3 | 0 |
| Case 63 | 6 | 132,912,612 | 133,237,557 | 3 | 1 | 4 | 0 |
| Case 63 | 6 | 133,242,963 | 134,248,060 | 2 | 1 | 3 | 0 |
| Case 63 | 6 | 134,259,753 | 147,148,863 | 2 | 2 | 4 | 0 |
| Case 63 | 6 | 147,158,227 | 147,259,868 | 2 | 1 | 3 | 0 |
| Case 63 | 6 | 147,268,277 | 161,430,468 | 2 | 2 | 4 | 0 |
| Case 63 | 6 | 161,433,981 | 161,690,121 | 2 | 1 | 3 | 0 |
| Case 63 | 6 | 161,692,286 | 162,559,180 | 2 | 2 | 4 | 0 |
| Case 63 | 6 | 162,565,718 | 162,995,680 | 2 | 1 | 3 | 0 |
| Case 63 | 6 | 162,996,263 | 170,980,171 | 2 | 2 | 4 | 0 |

|         |   |             |             |   |   |   |   |
|---------|---|-------------|-------------|---|---|---|---|
| Case 63 | 7 | 44,935      | 5,607,884   | 2 | 1 | 3 | 0 |
| Case 63 | 7 | 5,607,908   | 6,316,798   | 2 | 2 | 4 | 0 |
| Case 63 | 7 | 6,334,747   | 9,815,039   | 2 | 1 | 3 | 0 |
| Case 63 | 7 | 9,819,610   | 9,819,610   | 1 | 1 | 2 | 0 |
| Case 63 | 7 | 9,826,825   | 9,862,917   | 0 | 0 | 0 | 0 |
| Case 63 | 7 | 9,867,749   | 9,867,749   | 1 | 1 | 2 | 0 |
| Case 63 | 7 | 9,868,553   | 17,375,326  | 2 | 1 | 3 | 0 |
| Case 63 | 7 | 17,378,904  | 17,728,255  | 3 | 1 | 4 | 0 |
| Case 63 | 7 | 17,730,469  | 31,465,743  | 2 | 1 | 3 | 0 |
| Case 63 | 7 | 31,466,377  | 31,552,117  | 3 | 1 | 4 | 0 |
| Case 63 | 7 | 31,555,490  | 38,292,663  | 2 | 1 | 3 | 0 |
| Case 63 | 7 | 38,297,145  | 38,374,697  | 3 | 1 | 4 | 0 |
| Case 63 | 7 | 38,380,446  | 43,713,856  | 2 | 1 | 3 | 0 |
| Case 63 | 7 | 43,728,129  | 44,189,274  | 2 | 2 | 4 | 0 |
| Case 63 | 7 | 44,189,389  | 58,019,061  | 2 | 1 | 3 | 0 |
| Case 63 | 7 | 61,056,053  | 64,537,992  | 2 | 1 | 3 | 0 |
| Case 63 | 7 | 64,541,586  | 65,350,058  | 3 | 1 | 4 | 0 |
| Case 63 | 7 | 65,360,715  | 99,238,141  | 2 | 1 | 3 | 0 |
| Case 63 | 7 | 99,238,342  | 99,691,871  | 3 | 1 | 4 | 0 |
| Case 63 | 7 | 99,692,993  | 102,992,566 | 2 | 1 | 3 | 0 |
| Case 63 | 7 | 102,999,943 | 103,281,044 | 3 | 1 | 4 | 0 |
| Case 63 | 7 | 103,283,013 | 109,757,243 | 2 | 1 | 3 | 0 |
| Case 63 | 7 | 109,774,271 | 109,931,836 | 3 | 1 | 4 | 0 |
| Case 63 | 7 | 109,933,856 | 111,651,812 | 2 | 1 | 3 | 0 |
| Case 63 | 7 | 111,654,066 | 111,658,510 | 2 | 0 | 2 | 1 |
| Case 63 | 7 | 111,661,836 | 111,785,581 | 3 | 0 | 3 | 1 |
| Case 63 | 7 | 111,785,993 | 111,839,373 | 2 | 0 | 2 | 1 |
| Case 63 | 7 | 111,845,773 | 141,272,716 | 2 | 1 | 3 | 0 |
| Case 63 | 7 | 141,286,885 | 142,458,527 | 3 | 1 | 4 | 0 |
| Case 63 | 7 | 142,459,680 | 153,794,636 | 2 | 1 | 3 | 0 |
| Case 63 | 7 | 153,811,655 | 157,409,757 | 3 | 1 | 4 | 0 |
| Case 63 | 7 | 157,412,024 | 157,819,325 | 2 | 1 | 3 | 0 |
| Case 63 | 7 | 157,822,976 | 158,031,556 | 1 | 1 | 2 | 0 |
| Case 63 | 7 | 158,031,749 | 158,986,017 | 2 | 1 | 3 | 0 |
| Case 63 | 7 | 158,996,510 | 159,119,486 | 3 | 1 | 4 | 0 |
| Case 63 | 8 | 164,984     | 1,676,789   | 2 | 0 | 2 | 1 |
| Case 63 | 8 | 1,678,019   | 1,832,844   | 3 | 0 | 3 | 1 |
| Case 63 | 8 | 1,839,973   | 2,089,096   | 2 | 0 | 2 | 1 |
| Case 63 | 8 | 2,091,139   | 2,143,681   | 3 | 0 | 3 | 1 |
| Case 63 | 8 | 2,143,792   | 2,747,940   | 2 | 0 | 2 | 1 |
| Case 63 | 8 | 2,748,821   | 2,915,862   | 4 | 0 | 4 | 1 |
| Case 63 | 8 | 2,919,891   | 2,923,691   | 2 | 1 | 3 | 0 |
| Case 63 | 8 | 2,924,014   | 5,369,076   | 2 | 0 | 2 | 1 |
| Case 63 | 8 | 5,369,603   | 5,400,926   | 3 | 0 | 3 | 1 |
| Case 63 | 8 | 5,405,145   | 6,016,801   | 2 | 0 | 2 | 1 |
| Case 63 | 8 | 6,018,779   | 6,234,672   | 3 | 0 | 3 | 1 |
| Case 63 | 8 | 6,236,764   | 6,378,794   | 2 | 0 | 2 | 1 |
| Case 63 | 8 | 6,383,599   | 6,484,968   | 3 | 0 | 3 | 1 |
| Case 63 | 8 | 6,487,331   | 6,635,669   | 2 | 0 | 2 | 1 |
| Case 63 | 8 | 6,637,188   | 6,742,558   | 3 | 0 | 3 | 1 |
| Case 63 | 8 | 6,743,029   | 8,239,085   | 2 | 0 | 2 | 1 |
| Case 63 | 8 | 8,241,316   | 9,225,258   | 3 | 0 | 3 | 1 |
| Case 63 | 8 | 9,225,872   | 9,718,278   | 2 | 0 | 2 | 1 |
| Case 63 | 8 | 9,727,527   | 10,288,461  | 3 | 0 | 3 | 1 |
| Case 63 | 8 | 10,289,663  | 10,480,522  | 2 | 0 | 2 | 1 |
| Case 63 | 8 | 10,480,543  | 11,097,804  | 3 | 0 | 3 | 1 |
| Case 63 | 8 | 11,099,612  | 11,639,991  | 2 | 0 | 2 | 1 |
| Case 63 | 8 | 11,640,722  | 11,831,477  | 3 | 0 | 3 | 1 |
| Case 63 | 8 | 11,833,262  | 13,333,763  | 2 | 0 | 2 | 1 |
| Case 63 | 8 | 13,333,857  | 13,395,662  | 3 | 0 | 3 | 1 |
| Case 63 | 8 | 13,396,623  | 16,417,588  | 2 | 0 | 2 | 1 |

|         |   |            |            |   |   |   |   |
|---------|---|------------|------------|---|---|---|---|
| Case 63 | 8 | 16,427,536 | 16,427,536 | 2 | 1 | 3 | 0 |
| Case 63 | 8 | 16,429,770 | 16,429,770 | 1 | 1 | 2 | 0 |
| Case 63 | 8 | 16,435,574 | 16,500,728 | 1 | 0 | 1 | 0 |
| Case 63 | 8 | 16,502,722 | 16,526,958 | 3 | 0 | 3 | 1 |
| Case 63 | 8 | 16,538,391 | 17,156,393 | 2 | 0 | 2 | 1 |
| Case 63 | 8 | 17,156,904 | 17,713,120 | 3 | 0 | 3 | 1 |
| Case 63 | 8 | 17,714,562 | 17,903,046 | 2 | 0 | 2 | 1 |
| Case 63 | 8 | 17,907,843 | 18,074,574 | 3 | 0 | 3 | 1 |
| Case 63 | 8 | 18,074,901 | 18,099,877 | 2 | 0 | 2 | 1 |
| Case 63 | 8 | 18,100,220 | 18,243,468 | 3 | 0 | 3 | 1 |
| Case 63 | 8 | 18,243,603 | 18,497,616 | 2 | 0 | 2 | 1 |
| Case 63 | 8 | 18,497,842 | 18,567,975 | 3 | 0 | 3 | 1 |
| Case 63 | 8 | 18,568,985 | 20,548,817 | 2 | 0 | 2 | 1 |
| Case 63 | 8 | 20,549,450 | 21,487,554 | 3 | 0 | 3 | 1 |
| Case 63 | 8 | 21,487,597 | 22,168,712 | 2 | 0 | 2 | 1 |
| Case 63 | 8 | 22,168,751 | 22,297,621 | 3 | 0 | 3 | 1 |
| Case 63 | 8 | 22,297,849 | 22,582,428 | 2 | 0 | 2 | 1 |
| Case 63 | 8 | 22,582,461 | 22,901,568 | 3 | 0 | 3 | 1 |
| Case 63 | 8 | 22,911,073 | 23,104,413 | 2 | 0 | 2 | 1 |
| Case 63 | 8 | 23,104,612 | 23,714,609 | 3 | 0 | 3 | 1 |
| Case 63 | 8 | 23,724,908 | 24,359,085 | 2 | 0 | 2 | 1 |
| Case 63 | 8 | 24,362,810 | 25,306,521 | 3 | 0 | 3 | 1 |
| Case 63 | 8 | 25,307,798 | 25,365,042 | 2 | 0 | 2 | 1 |
| Case 63 | 8 | 25,371,087 | 26,290,773 | 3 | 0 | 3 | 1 |
| Case 63 | 8 | 26,295,234 | 26,340,833 | 2 | 0 | 2 | 1 |
| Case 63 | 8 | 26,343,095 | 26,524,421 | 3 | 0 | 3 | 1 |
| Case 63 | 8 | 26,530,079 | 26,574,853 | 2 | 0 | 2 | 1 |
| Case 63 | 8 | 26,576,125 | 27,321,172 | 3 | 0 | 3 | 1 |
| Case 63 | 8 | 27,321,189 | 27,373,865 | 2 | 0 | 2 | 1 |
| Case 63 | 8 | 27,373,923 | 27,516,706 | 3 | 0 | 3 | 1 |
| Case 63 | 8 | 27,516,855 | 28,439,437 | 2 | 0 | 2 | 1 |
| Case 63 | 8 | 28,441,331 | 30,427,531 | 3 | 0 | 3 | 1 |
| Case 63 | 8 | 30,434,903 | 36,410,648 | 2 | 0 | 2 | 1 |
| Case 63 | 8 | 36,418,643 | 37,734,854 | 3 | 0 | 3 | 1 |
| Case 63 | 8 | 37,738,616 | 37,815,009 | 2 | 0 | 2 | 1 |
| Case 63 | 8 | 37,817,175 | 38,036,165 | 3 | 0 | 3 | 1 |
| Case 63 | 8 | 38,050,243 | 38,599,218 | 2 | 0 | 2 | 1 |
| Case 63 | 8 | 38,599,893 | 38,840,591 | 3 | 0 | 3 | 1 |
| Case 63 | 8 | 38,845,455 | 43,791,691 | 2 | 0 | 2 | 1 |
| Case 63 | 8 | 46,886,735 | 52,831,142 | 2 | 0 | 2 | 1 |
| Case 63 | 8 | 52,844,411 | 52,945,956 | 5 | 1 | 6 | 0 |
| Case 63 | 8 | 52,948,365 | 53,851,462 | 4 | 2 | 6 | 0 |
| Case 63 | 8 | 53,852,583 | 59,107,029 | 4 | 1 | 5 | 0 |
| Case 63 | 8 | 59,113,981 | 59,229,893 | 5 | 1 | 6 | 0 |
| Case 63 | 8 | 59,235,124 | 59,413,190 | 4 | 2 | 6 | 0 |
| Case 63 | 8 | 59,417,753 | 59,752,981 | 4 | 1 | 5 | 0 |
| Case 63 | 8 | 59,753,928 | 60,132,194 | 5 | 1 | 6 | 0 |
| Case 63 | 8 | 60,148,051 | 61,134,995 | 4 | 2 | 6 | 0 |
| Case 63 | 8 | 61,140,958 | 62,006,248 | 4 | 1 | 5 | 0 |
| Case 63 | 8 | 62,007,449 | 64,369,361 | 5 | 1 | 6 | 0 |
| Case 63 | 8 | 64,381,431 | 66,438,548 | 4 | 2 | 6 | 0 |
| Case 63 | 8 | 66,438,842 | 67,400,061 | 4 | 1 | 5 | 0 |
| Case 63 | 8 | 67,400,347 | 68,334,782 | 5 | 1 | 6 | 0 |
| Case 63 | 8 | 68,334,816 | 70,446,384 | 4 | 2 | 6 | 0 |
| Case 63 | 8 | 70,447,058 | 70,855,209 | 4 | 1 | 5 | 0 |
| Case 63 | 8 | 70,855,759 | 70,931,383 | 5 | 1 | 6 | 0 |
| Case 63 | 8 | 70,931,521 | 75,610,456 | 4 | 2 | 6 | 0 |
| Case 63 | 8 | 75,614,614 | 75,802,572 | 4 | 1 | 5 | 0 |
| Case 63 | 8 | 75,803,536 | 77,625,309 | 5 | 1 | 6 | 0 |
| Case 63 | 8 | 77,631,295 | 77,760,079 | 4 | 2 | 6 | 0 |
| Case 63 | 8 | 77,761,269 | 78,021,585 | 4 | 1 | 5 | 0 |

|         |   |             |             |   |   |   |   |
|---------|---|-------------|-------------|---|---|---|---|
| Case 63 | 8 | 78,026,317  | 78,095,409  | 5 | 1 | 6 | 0 |
| Case 63 | 8 | 78,101,085  | 81,397,268  | 4 | 2 | 6 | 0 |
| Case 63 | 8 | 81,399,527  | 81,426,196  | 4 | 1 | 5 | 0 |
| Case 63 | 8 | 81,429,892  | 84,570,892  | 5 | 1 | 6 | 0 |
| Case 63 | 8 | 84,572,978  | 86,493,592  | 4 | 2 | 6 | 0 |
| Case 63 | 8 | 86,494,538  | 87,076,810  | 4 | 1 | 5 | 0 |
| Case 63 | 8 | 87,083,747  | 87,716,283  | 5 | 1 | 6 | 0 |
| Case 63 | 8 | 87,720,350  | 89,209,945  | 4 | 2 | 6 | 0 |
| Case 63 | 8 | 89,209,965  | 89,218,210  | 4 | 1 | 5 | 0 |
| Case 63 | 8 | 89,220,059  | 90,300,401  | 5 | 1 | 6 | 0 |
| Case 63 | 8 | 90,307,568  | 91,953,107  | 4 | 2 | 6 | 0 |
| Case 63 | 8 | 91,953,138  | 94,143,207  | 4 | 1 | 5 | 0 |
| Case 63 | 8 | 94,157,521  | 95,502,257  | 5 | 1 | 6 | 0 |
| Case 63 | 8 | 95,502,554  | 96,027,306  | 4 | 2 | 6 | 0 |
| Case 63 | 8 | 96,027,392  | 96,043,829  | 4 | 1 | 5 | 0 |
| Case 63 | 8 | 96,044,300  | 96,594,769  | 5 | 1 | 6 | 0 |
| Case 63 | 8 | 96,596,354  | 97,112,032  | 4 | 2 | 6 | 0 |
| Case 63 | 8 | 97,122,652  | 99,895,405  | 4 | 1 | 5 | 0 |
| Case 63 | 8 | 99,925,628  | 100,358,074 | 3 | 1 | 4 | 0 |
| Case 63 | 8 | 100,359,742 | 100,433,468 | 4 | 1 | 5 | 0 |
| Case 63 | 8 | 100,443,798 | 101,472,510 | 5 | 1 | 6 | 0 |
| Case 63 | 8 | 101,473,019 | 101,637,901 | 4 | 2 | 6 | 0 |
| Case 63 | 8 | 101,642,553 | 101,725,374 | 4 | 1 | 5 | 0 |
| Case 63 | 8 | 101,725,401 | 102,601,618 | 5 | 1 | 6 | 0 |
| Case 63 | 8 | 102,604,019 | 103,524,176 | 4 | 2 | 6 | 0 |
| Case 63 | 8 | 103,524,461 | 103,940,219 | 4 | 1 | 5 | 0 |
| Case 63 | 8 | 103,940,336 | 105,232,453 | 5 | 1 | 6 | 0 |
| Case 63 | 8 | 105,233,131 | 105,292,163 | 4 | 2 | 6 | 0 |
| Case 63 | 8 | 105,292,565 | 105,890,188 | 4 | 1 | 5 | 0 |
| Case 63 | 8 | 105,890,308 | 105,930,209 | 5 | 1 | 6 | 0 |
| Case 63 | 8 | 105,930,490 | 110,300,579 | 4 | 2 | 6 | 0 |
| Case 63 | 8 | 110,301,998 | 110,622,831 | 4 | 1 | 5 | 0 |
| Case 63 | 8 | 110,627,005 | 110,714,321 | 5 | 1 | 6 | 0 |
| Case 63 | 8 | 110,721,705 | 115,626,102 | 4 | 2 | 6 | 0 |
| Case 63 | 8 | 115,641,238 | 118,308,214 | 4 | 1 | 5 | 0 |
| Case 63 | 8 | 118,309,831 | 122,299,388 | 5 | 1 | 6 | 0 |
| Case 63 | 8 | 122,301,156 | 123,537,948 | 4 | 2 | 6 | 0 |
| Case 63 | 8 | 123,538,147 | 124,023,621 | 4 | 1 | 5 | 0 |
| Case 63 | 8 | 124,024,823 | 124,267,004 | 5 | 1 | 6 | 0 |
| Case 63 | 8 | 124,267,441 | 125,044,118 | 4 | 2 | 6 | 0 |
| Case 63 | 8 | 125,047,645 | 125,240,331 | 4 | 1 | 5 | 0 |
| Case 63 | 8 | 125,241,796 | 128,071,922 | 5 | 1 | 6 | 0 |
| Case 63 | 8 | 128,072,019 | 129,031,734 | 4 | 2 | 6 | 0 |
| Case 63 | 8 | 129,036,062 | 129,162,497 | 4 | 1 | 5 | 0 |
| Case 63 | 8 | 129,163,047 | 131,771,222 | 5 | 1 | 6 | 0 |
| Case 63 | 8 | 131,774,876 | 131,781,235 | 4 | 2 | 6 | 0 |
| Case 63 | 8 | 131,792,219 | 132,000,301 | 4 | 1 | 5 | 0 |
| Case 63 | 8 | 132,002,334 | 132,353,735 | 5 | 1 | 6 | 0 |
| Case 63 | 8 | 132,355,894 | 133,023,595 | 4 | 2 | 6 | 0 |
| Case 63 | 8 | 133,029,845 | 134,707,646 | 4 | 1 | 5 | 0 |
| Case 63 | 8 | 134,708,017 | 135,249,548 | 5 | 1 | 6 | 0 |
| Case 63 | 8 | 135,250,072 | 135,272,269 | 4 | 2 | 6 | 0 |
| Case 63 | 8 | 135,278,536 | 136,855,729 | 4 | 1 | 5 | 0 |
| Case 63 | 8 | 136,868,367 | 138,866,496 | 5 | 1 | 6 | 0 |
| Case 63 | 8 | 138,871,092 | 139,051,846 | 4 | 2 | 6 | 0 |
| Case 63 | 8 | 139,062,339 | 144,929,811 | 4 | 1 | 5 | 0 |
| Case 63 | 8 | 144,936,032 | 144,943,223 | 3 | 1 | 4 | 0 |
| Case 63 | 8 | 144,943,389 | 144,946,799 | 7 | 0 | 7 | 1 |
| Case 63 | 8 | 144,946,818 | 144,947,073 | 2 | 1 | 3 | 0 |
| Case 63 | 8 | 144,947,117 | 146,293,414 | 4 | 1 | 5 | 0 |
| Case 63 | 9 | 46,587      | 9,230,674   | 1 | 1 | 2 | 0 |

|         |    |             |             |   |   |   |   |
|---------|----|-------------|-------------|---|---|---|---|
| Case 63 | 9  | 9,231,566   | 9,649,668   | 1 | 0 | 1 | 0 |
| Case 63 | 9  | 9,664,440   | 19,234,908  | 1 | 1 | 2 | 0 |
| Case 63 | 9  | 19,235,270  | 19,698,751  | 2 | 1 | 3 | 0 |
| Case 63 | 9  | 19,700,975  | 32,619,211  | 1 | 1 | 2 | 0 |
| Case 63 | 9  | 32,625,622  | 33,469,096  | 2 | 1 | 3 | 0 |
| Case 63 | 9  | 33,469,191  | 34,372,725  | 1 | 1 | 2 | 0 |
| Case 63 | 9  | 34,372,783  | 34,506,738  | 2 | 1 | 3 | 0 |
| Case 63 | 9  | 34,506,756  | 35,738,371  | 1 | 1 | 2 | 0 |
| Case 63 | 9  | 35,739,655  | 35,841,071  | 2 | 1 | 3 | 0 |
| Case 63 | 9  | 35,841,783  | 46,944,322  | 1 | 1 | 2 | 0 |
| Case 63 | 9  | 65,629,772  | 95,502,571  | 1 | 1 | 2 | 0 |
| Case 63 | 9  | 95,527,885  | 96,077,465  | 2 | 1 | 3 | 0 |
| Case 63 | 9  | 96,080,699  | 98,146,478  | 1 | 1 | 2 | 0 |
| Case 63 | 9  | 98,147,804  | 98,426,006  | 2 | 1 | 3 | 0 |
| Case 63 | 9  | 98,428,619  | 98,957,977  | 1 | 1 | 2 | 0 |
| Case 63 | 9  | 98,958,949  | 116,752,771 | 3 | 1 | 4 | 0 |
| Case 63 | 9  | 116,763,905 | 116,780,992 | 1 | 1 | 2 | 0 |
| Case 63 | 9  | 116,782,921 | 131,221,884 | 3 | 1 | 4 | 0 |
| Case 63 | 9  | 131,221,904 | 131,513,717 | 2 | 1 | 3 | 0 |
| Case 63 | 9  | 131,515,055 | 131,515,516 | 3 | 0 | 3 | 1 |
| Case 63 | 9  | 131,515,547 | 131,671,142 | 3 | 1 | 4 | 0 |
| Case 63 | 9  | 131,672,153 | 131,825,843 | 3 | 0 | 3 | 1 |
| Case 63 | 9  | 131,828,285 | 135,431,295 | 3 | 1 | 4 | 0 |
| Case 63 | 9  | 135,435,742 | 135,867,989 | 2 | 2 | 4 | 0 |
| Case 63 | 9  | 135,872,063 | 135,917,586 | 2 | 1 | 3 | 0 |
| Case 63 | 9  | 135,919,118 | 136,198,803 | 3 | 1 | 4 | 0 |
| Case 63 | 9  | 136,198,932 | 136,518,097 | 3 | 0 | 3 | 1 |
| Case 63 | 9  | 136,519,216 | 136,573,510 | 3 | 1 | 4 | 0 |
| Case 63 | 9  | 136,573,536 | 136,641,170 | 2 | 1 | 3 | 0 |
| Case 63 | 9  | 136,641,177 | 136,874,066 | 3 | 1 | 4 | 0 |
| Case 63 | 9  | 136,874,158 | 137,123,248 | 2 | 1 | 3 | 0 |
| Case 63 | 9  | 137,124,673 | 138,365,495 | 3 | 1 | 4 | 0 |
| Case 63 | 9  | 138,366,254 | 138,425,308 | 2 | 1 | 3 | 0 |
| Case 63 | 9  | 138,428,645 | 138,584,199 | 3 | 1 | 4 | 0 |
| Case 63 | 9  | 138,585,525 | 138,867,842 | 2 | 1 | 3 | 0 |
| Case 63 | 9  | 138,875,850 | 138,992,466 | 3 | 1 | 4 | 0 |
| Case 63 | 9  | 138,999,710 | 138,999,710 | 3 | 0 | 3 | 1 |
| Case 63 | 9  | 139,000,752 | 139,340,155 | 4 | 0 | 4 | 1 |
| Case 63 | 9  | 139,341,700 | 139,371,818 | 2 | 1 | 3 | 0 |
| Case 63 | 9  | 139,371,940 | 139,501,325 | 4 | 0 | 4 | 1 |
| Case 63 | 9  | 139,511,247 | 139,570,617 | 4 | 1 | 5 | 0 |
| Case 63 | 9  | 139,571,430 | 139,728,202 | 4 | 0 | 4 | 1 |
| Case 63 | 9  | 139,728,504 | 139,732,380 | 3 | 1 | 4 | 0 |
| Case 63 | 9  | 139,733,365 | 140,301,447 | 3 | 0 | 3 | 1 |
| Case 63 | 9  | 140,305,091 | 140,738,306 | 2 | 1 | 3 | 0 |
| Case 63 | 9  | 140,751,501 | 141,066,491 | 3 | 1 | 4 | 0 |
| Case 63 | 10 | 98,087      | 4,547,174   | 2 | 2 | 4 | 0 |
| Case 63 | 10 | 4,554,674   | 5,916,771   | 4 | 2 | 6 | 0 |
| Case 63 | 10 | 5,920,121   | 5,965,620   | 4 | 1 | 5 | 0 |
| Case 63 | 10 | 5,967,006   | 6,057,732   | 2 | 2 | 4 | 0 |
| Case 63 | 10 | 6,059,898   | 6,152,413   | 3 | 2 | 5 | 0 |
| Case 63 | 10 | 6,153,297   | 11,694,596  | 2 | 2 | 4 | 0 |
| Case 63 | 10 | 11,697,403  | 11,962,266  | 3 | 2 | 5 | 0 |
| Case 63 | 10 | 11,966,016  | 18,922,659  | 2 | 2 | 4 | 0 |
| Case 63 | 10 | 18,929,856  | 19,197,265  | 3 | 2 | 5 | 0 |
| Case 63 | 10 | 19,198,427  | 38,973,500  | 2 | 2 | 4 | 0 |
| Case 63 | 10 | 38,995,349  | 39,097,912  | 2 | 1 | 3 | 0 |
| Case 63 | 10 | 42,436,301  | 56,102,910  | 2 | 1 | 3 | 0 |
| Case 63 | 10 | 56,104,514  | 56,207,497  | 1 | 1 | 2 | 0 |
| Case 63 | 10 | 56,208,736  | 74,016,351  | 2 | 1 | 3 | 0 |
| Case 63 | 10 | 74,020,044  | 74,185,638  | 3 | 1 | 4 | 0 |

|         |    |             |             |   |   |   |   |
|---------|----|-------------|-------------|---|---|---|---|
| Case 63 | 10 | 74,204,929  | 76,092,691  | 2 | 1 | 3 | 0 |
| Case 63 | 10 | 76,131,244  | 76,757,407  | 2 | 0 | 2 | 1 |
| Case 63 | 10 | 76,760,631  | 80,458,157  | 2 | 1 | 3 | 0 |
| Case 63 | 10 | 80,459,780  | 81,209,298  | 3 | 1 | 4 | 0 |
| Case 63 | 10 | 81,212,186  | 90,748,736  | 2 | 1 | 3 | 0 |
| Case 63 | 10 | 90,749,963  | 91,393,013  | 2 | 2 | 4 | 0 |
| Case 63 | 10 | 91,395,428  | 91,469,145  | 2 | 1 | 3 | 0 |
| Case 63 | 10 | 91,469,156  | 91,522,564  | 1 | 1 | 2 | 0 |
| Case 63 | 10 | 91,528,087  | 120,650,662 | 2 | 1 | 3 | 0 |
| Case 63 | 10 | 120,663,911 | 121,203,194 | 3 | 1 | 4 | 0 |
| Case 63 | 10 | 121,207,272 | 122,420,456 | 2 | 1 | 3 | 0 |
| Case 63 | 10 | 122,429,367 | 123,510,055 | 2 | 2 | 4 | 0 |
| Case 63 | 10 | 123,518,349 | 123,643,822 | 2 | 1 | 3 | 0 |
| Case 63 | 10 | 123,658,376 | 123,878,029 | 3 | 1 | 4 | 0 |
| Case 63 | 10 | 123,878,679 | 124,062,106 | 4 | 1 | 5 | 0 |
| Case 63 | 10 | 124,063,140 | 124,417,654 | 3 | 1 | 4 | 0 |
| Case 63 | 10 | 124,417,900 | 124,523,514 | 4 | 1 | 5 | 0 |
| Case 63 | 10 | 124,524,241 | 124,648,997 | 4 | 0 | 4 | 1 |
| Case 63 | 10 | 124,660,458 | 134,994,032 | 2 | 1 | 3 | 0 |
| Case 63 | 10 | 134,996,849 | 135,025,264 | 1 | 1 | 2 | 0 |
| Case 63 | 10 | 135,027,248 | 135,477,883 | 2 | 1 | 3 | 0 |
| Case 63 | 11 | 193,146     | 244,129     | 2 | 2 | 4 | 0 |
| Case 63 | 11 | 244,141     | 34,625,239  | 2 | 1 | 3 | 0 |
| Case 63 | 11 | 34,626,877  | 34,626,877  | 3 | 1 | 4 | 0 |
| Case 63 | 11 | 34,633,745  | 34,672,161  | 3 | 0 | 3 | 1 |
| Case 63 | 11 | 34,672,889  | 51,591,253  | 2 | 1 | 3 | 0 |
| Case 63 | 11 | 54,794,237  | 67,760,366  | 2 | 1 | 3 | 0 |
| Case 63 | 11 | 67,764,091  | 67,817,679  | 2 | 0 | 2 | 1 |
| Case 63 | 11 | 67,817,876  | 68,088,831  | 3 | 0 | 3 | 1 |
| Case 63 | 11 | 68,089,659  | 68,905,412  | 2 | 0 | 2 | 1 |
| Case 63 | 11 | 68,905,440  | 69,174,170  | 3 | 0 | 3 | 1 |
| Case 63 | 11 | 69,177,047  | 69,392,304  | 2 | 0 | 2 | 1 |
| Case 63 | 11 | 69,392,952  | 69,837,473  | 3 | 0 | 3 | 1 |
| Case 63 | 11 | 69,838,148  | 73,371,847  | 2 | 0 | 2 | 1 |
| Case 63 | 11 | 73,371,898  | 74,660,292  | 3 | 0 | 3 | 1 |
| Case 63 | 11 | 74,664,025  | 76,108,796  | 2 | 1 | 3 | 0 |
| Case 63 | 11 | 76,116,713  | 77,032,307  | 3 | 1 | 4 | 0 |
| Case 63 | 11 | 77,050,714  | 77,587,973  | 2 | 1 | 3 | 0 |
| Case 63 | 11 | 77,590,122  | 77,749,228  | 3 | 1 | 4 | 0 |
| Case 63 | 11 | 77,773,715  | 80,059,033  | 2 | 1 | 3 | 0 |
| Case 63 | 11 | 80,062,406  | 80,140,069  | 1 | 1 | 2 | 0 |
| Case 63 | 11 | 80,140,376  | 110,710,617 | 2 | 1 | 3 | 0 |
| Case 63 | 11 | 110,712,113 | 111,796,829 | 3 | 1 | 4 | 0 |
| Case 63 | 11 | 111,796,904 | 117,906,510 | 2 | 1 | 3 | 0 |
| Case 63 | 11 | 117,909,101 | 118,773,140 | 2 | 2 | 4 | 0 |
| Case 63 | 11 | 118,779,309 | 134,934,063 | 2 | 1 | 3 | 0 |
| Case 63 | 12 | 191,619     | 11,521,626  | 1 | 1 | 2 | 0 |
| Case 63 | 12 | 11,543,002  | 11,848,493  | 2 | 1 | 3 | 0 |
| Case 63 | 12 | 11,850,632  | 13,685,476  | 1 | 1 | 2 | 0 |
| Case 63 | 12 | 13,686,475  | 13,731,244  | 2 | 1 | 3 | 0 |
| Case 63 | 12 | 13,732,821  | 18,141,629  | 1 | 1 | 2 | 0 |
| Case 63 | 12 | 18,144,298  | 18,684,104  | 1 | 0 | 1 | 0 |
| Case 63 | 12 | 18,685,521  | 18,930,338  | 1 | 1 | 2 | 0 |
| Case 63 | 12 | 18,948,319  | 19,427,764  | 2 | 1 | 3 | 0 |
| Case 63 | 12 | 19,427,766  | 25,917,408  | 1 | 1 | 2 | 0 |
| Case 63 | 12 | 25,921,843  | 26,472,718  | 5 | 0 | 5 | 1 |
| Case 63 | 12 | 26,475,967  | 26,475,967  | 3 | 1 | 4 | 0 |
| Case 63 | 12 | 26,485,544  | 26,515,156  | 4 | 1 | 5 | 0 |
| Case 63 | 12 | 26,517,979  | 27,016,527  | 5 | 1 | 6 | 0 |
| Case 63 | 12 | 27,020,533  | 27,020,533  | 4 | 2 | 6 | 0 |
| Case 63 | 12 | 27,021,673  | 27,544,345  | 4 | 1 | 5 | 0 |

|         |    |             |             |   |   |   |   |
|---------|----|-------------|-------------|---|---|---|---|
| Case 63 | 12 | 27,546,377  | 29,149,089  | 5 | 1 | 6 | 0 |
| Case 63 | 12 | 29,180,359  | 34,853,011  | 3 | 1 | 4 | 0 |
| Case 63 | 12 | 37,876,400  | 40,053,423  | 3 | 1 | 4 | 0 |
| Case 63 | 12 | 40,053,888  | 40,707,861  | 2 | 1 | 3 | 0 |
| Case 63 | 12 | 40,709,068  | 50,503,269  | 3 | 1 | 4 | 0 |
| Case 63 | 12 | 50,505,881  | 50,727,811  | 4 | 1 | 5 | 0 |
| Case 63 | 12 | 50,727,870  | 53,924,293  | 3 | 1 | 4 | 0 |
| Case 63 | 12 | 53,925,589  | 54,575,620  | 4 | 1 | 5 | 0 |
| Case 63 | 12 | 54,576,323  | 58,117,355  | 3 | 1 | 4 | 0 |
| Case 63 | 12 | 58,117,645  | 58,207,969  | 2 | 2 | 4 | 0 |
| Case 63 | 12 | 58,208,164  | 58,614,957  | 3 | 2 | 5 | 0 |
| Case 63 | 12 | 58,631,149  | 131,140,688 | 3 | 1 | 4 | 0 |
| Case 63 | 12 | 131,141,905 | 131,217,685 | 2 | 1 | 3 | 0 |
| Case 63 | 12 | 131,218,851 | 132,106,366 | 3 | 1 | 4 | 0 |
| Case 63 | 12 | 132,115,667 | 133,286,894 | 3 | 0 | 3 | 1 |
| Case 63 | 12 | 133,291,473 | 133,810,935 | 2 | 1 | 3 | 0 |
| Case 63 | 13 | 19,058,717  | 20,520,907  | 4 | 1 | 5 | 0 |
| Case 63 | 13 | 20,524,705  | 20,769,712  | 3 | 1 | 4 | 0 |
| Case 63 | 13 | 20,772,687  | 20,962,029  | 4 | 1 | 5 | 0 |
| Case 63 | 13 | 20,969,210  | 21,510,900  | 3 | 1 | 4 | 0 |
| Case 63 | 13 | 21,512,850  | 21,698,120  | 4 | 1 | 5 | 0 |
| Case 63 | 13 | 21,700,503  | 22,448,843  | 3 | 1 | 4 | 0 |
| Case 63 | 13 | 22,449,282  | 23,072,446  | 4 | 1 | 5 | 0 |
| Case 63 | 13 | 23,073,615  | 23,337,187  | 3 | 1 | 4 | 0 |
| Case 63 | 13 | 23,338,254  | 24,639,957  | 4 | 1 | 5 | 0 |
| Case 63 | 13 | 24,640,701  | 27,076,469  | 3 | 1 | 4 | 0 |
| Case 63 | 13 | 27,081,152  | 28,426,828  | 4 | 1 | 5 | 0 |
| Case 63 | 13 | 28,427,031  | 29,186,482  | 3 | 1 | 4 | 0 |
| Case 63 | 13 | 29,191,735  | 29,560,146  | 4 | 1 | 5 | 0 |
| Case 63 | 13 | 29,566,537  | 29,623,790  | 3 | 1 | 4 | 0 |
| Case 63 | 13 | 29,623,857  | 31,117,125  | 4 | 1 | 5 | 0 |
| Case 63 | 13 | 31,124,651  | 31,910,751  | 3 | 1 | 4 | 0 |
| Case 63 | 13 | 31,921,922  | 32,715,802  | 4 | 1 | 5 | 0 |
| Case 63 | 13 | 32,716,488  | 32,886,038  | 3 | 1 | 4 | 0 |
| Case 63 | 13 | 32,886,213  | 32,911,932  | 4 | 1 | 5 | 0 |
| Case 63 | 13 | 32,911,937  | 33,762,773  | 3 | 1 | 4 | 0 |
| Case 63 | 13 | 33,766,576  | 34,399,945  | 4 | 1 | 5 | 0 |
| Case 63 | 13 | 34,404,147  | 35,280,104  | 3 | 1 | 4 | 0 |
| Case 63 | 13 | 35,283,075  | 36,297,517  | 4 | 1 | 5 | 0 |
| Case 63 | 13 | 36,298,299  | 38,251,689  | 3 | 1 | 4 | 0 |
| Case 63 | 13 | 38,251,798  | 38,758,183  | 4 | 1 | 5 | 0 |
| Case 63 | 13 | 38,761,138  | 41,383,515  | 3 | 1 | 4 | 0 |
| Case 63 | 13 | 41,385,658  | 42,636,943  | 4 | 1 | 5 | 0 |
| Case 63 | 13 | 42,639,852  | 43,408,842  | 3 | 1 | 4 | 0 |
| Case 63 | 13 | 43,409,346  | 43,493,219  | 4 | 1 | 5 | 0 |
| Case 63 | 13 | 43,493,915  | 43,949,318  | 3 | 1 | 4 | 0 |
| Case 63 | 13 | 43,952,370  | 46,510,731  | 4 | 1 | 5 | 0 |
| Case 63 | 13 | 46,511,517  | 47,451,320  | 3 | 1 | 4 | 0 |
| Case 63 | 13 | 47,452,038  | 47,767,007  | 4 | 1 | 5 | 0 |
| Case 63 | 13 | 47,767,498  | 47,973,025  | 4 | 0 | 4 | 1 |
| Case 63 | 13 | 47,973,276  | 48,350,699  | 4 | 1 | 5 | 0 |
| Case 63 | 13 | 48,362,583  | 50,141,707  | 3 | 1 | 4 | 0 |
| Case 63 | 13 | 50,141,897  | 50,395,858  | 4 | 1 | 5 | 0 |
| Case 63 | 13 | 50,396,755  | 51,417,377  | 3 | 1 | 4 | 0 |
| Case 63 | 13 | 51,417,535  | 51,842,513  | 4 | 1 | 5 | 0 |
| Case 63 | 13 | 51,844,429  | 53,340,133  | 3 | 1 | 4 | 0 |
| Case 63 | 13 | 53,345,097  | 53,398,068  | 4 | 1 | 5 | 0 |
| Case 63 | 13 | 53,398,824  | 53,479,919  | 4 | 0 | 4 | 1 |
| Case 63 | 13 | 53,485,073  | 53,640,171  | 4 | 1 | 5 | 0 |
| Case 63 | 13 | 53,645,448  | 54,395,310  | 3 | 1 | 4 | 0 |
| Case 63 | 13 | 54,396,931  | 54,580,274  | 4 | 1 | 5 | 0 |



|         |    |             |             |   |   |   |   |
|---------|----|-------------|-------------|---|---|---|---|
| Case 63 | 13 | 54,581,066  | 60,610,499  | 3 | 1 | 4 | 0 |
| Case 63 | 13 | 60,611,264  | 61,220,559  | 4 | 1 | 5 | 0 |
| Case 63 | 13 | 61,224,370  | 61,787,193  | 3 | 1 | 4 | 0 |
| Case 63 | 13 | 61,788,949  | 64,215,750  | 4 | 1 | 5 | 0 |
| Case 63 | 13 | 64,217,694  | 64,307,200  | 3 | 1 | 4 | 0 |
| Case 63 | 13 | 64,310,757  | 64,662,462  | 3 | 0 | 3 | 1 |
| Case 63 | 13 | 64,703,769  | 65,080,787  | 4 | 0 | 4 | 1 |
| Case 63 | 13 | 65,080,804  | 70,598,508  | 4 | 1 | 5 | 0 |
| Case 63 | 13 | 70,599,439  | 70,880,137  | 3 | 1 | 4 | 0 |
| Case 63 | 13 | 70,881,665  | 73,641,750  | 4 | 1 | 5 | 0 |
| Case 63 | 13 | 73,644,195  | 73,797,952  | 5 | 1 | 6 | 0 |
| Case 63 | 13 | 73,801,428  | 74,659,642  | 4 | 2 | 6 | 0 |
| Case 63 | 13 | 74,661,811  | 76,371,876  | 4 | 1 | 5 | 0 |
| Case 63 | 13 | 76,374,826  | 76,455,056  | 3 | 1 | 4 | 0 |
| Case 63 | 13 | 76,455,141  | 78,899,157  | 4 | 1 | 5 | 0 |
| Case 63 | 13 | 78,900,695  | 79,361,077  | 3 | 1 | 4 | 0 |
| Case 63 | 13 | 79,361,121  | 80,910,851  | 4 | 1 | 5 | 0 |
| Case 63 | 13 | 80,911,477  | 81,411,946  | 3 | 1 | 4 | 0 |
| Case 63 | 13 | 81,417,896  | 83,809,357  | 4 | 1 | 5 | 0 |
| Case 63 | 13 | 83,809,699  | 84,266,430  | 4 | 0 | 4 | 1 |
| Case 63 | 13 | 84,268,436  | 85,292,442  | 4 | 1 | 5 | 0 |
| Case 63 | 13 | 85,294,881  | 85,571,500  | 3 | 1 | 4 | 0 |
| Case 63 | 13 | 85,572,420  | 88,099,091  | 4 | 1 | 5 | 0 |
| Case 63 | 13 | 88,102,603  | 88,802,600  | 3 | 1 | 4 | 0 |
| Case 63 | 13 | 88,807,658  | 90,476,414  | 4 | 1 | 5 | 0 |
| Case 63 | 13 | 90,483,982  | 90,799,554  | 4 | 0 | 4 | 1 |
| Case 63 | 13 | 90,801,961  | 90,854,754  | 3 | 1 | 4 | 0 |
| Case 63 | 13 | 90,856,891  | 91,866,761  | 4 | 1 | 5 | 0 |
| Case 63 | 13 | 91,866,940  | 92,361,833  | 3 | 1 | 4 | 0 |
| Case 63 | 13 | 92,368,587  | 93,879,390  | 4 | 1 | 5 | 0 |
| Case 63 | 13 | 93,879,719  | 94,159,903  | 4 | 0 | 4 | 1 |
| Case 63 | 13 | 94,163,503  | 95,042,058  | 4 | 1 | 5 | 0 |
| Case 63 | 13 | 95,043,288  | 95,414,968  | 3 | 1 | 4 | 0 |
| Case 63 | 13 | 95,415,865  | 96,094,781  | 4 | 1 | 5 | 0 |
| Case 63 | 13 | 96,099,499  | 96,802,616  | 3 | 1 | 4 | 0 |
| Case 63 | 13 | 96,805,290  | 99,826,058  | 4 | 1 | 5 | 0 |
| Case 63 | 13 | 99,840,875  | 100,316,915 | 3 | 1 | 4 | 0 |
| Case 63 | 13 | 100,317,088 | 100,530,936 | 4 | 1 | 5 | 0 |
| Case 63 | 13 | 100,536,816 | 101,320,979 | 3 | 1 | 4 | 0 |
| Case 63 | 13 | 101,321,244 | 103,130,876 | 4 | 1 | 5 | 0 |
| Case 63 | 13 | 103,135,443 | 103,723,047 | 3 | 1 | 4 | 0 |
| Case 63 | 13 | 103,723,244 | 108,838,844 | 4 | 1 | 5 | 0 |
| Case 63 | 13 | 108,839,332 | 109,007,166 | 3 | 1 | 4 | 0 |
| Case 63 | 13 | 109,010,873 | 110,777,035 | 4 | 1 | 5 | 0 |
| Case 63 | 13 | 110,781,087 | 111,213,781 | 3 | 1 | 4 | 0 |
| Case 63 | 13 | 111,217,422 | 111,250,623 | 4 | 1 | 5 | 0 |
| Case 63 | 13 | 111,250,881 | 115,103,529 | 3 | 1 | 4 | 0 |
| Case 63 | 14 | 19,280,733  | 20,404,671  | 2 | 1 | 3 | 0 |
| Case 63 | 14 | 20,404,736  | 20,940,606  | 3 | 1 | 4 | 0 |
| Case 63 | 14 | 20,940,626  | 21,024,817  | 4 | 1 | 5 | 0 |
| Case 63 | 14 | 21,024,862  | 21,125,034  | 4 | 0 | 4 | 1 |
| Case 63 | 14 | 21,125,838  | 22,435,602  | 3 | 1 | 4 | 0 |
| Case 63 | 14 | 22,453,915  | 23,009,999  | 4 | 1 | 5 | 0 |
| Case 63 | 14 | 23,011,465  | 43,960,993  | 3 | 1 | 4 | 0 |
| Case 63 | 14 | 43,961,379  | 44,105,698  | 3 | 0 | 3 | 1 |
| Case 63 | 14 | 44,127,624  | 45,618,040  | 3 | 1 | 4 | 0 |
| Case 63 | 14 | 45,618,055  | 45,665,690  | 2 | 1 | 3 | 0 |
| Case 63 | 14 | 45,667,921  | 58,768,299  | 3 | 1 | 4 | 0 |
| Case 63 | 14 | 58,768,403  | 58,949,390  | 2 | 1 | 3 | 0 |
| Case 63 | 14 | 58,953,746  | 77,762,578  | 3 | 1 | 4 | 0 |
| Case 63 | 14 | 77,762,872  | 77,871,777  | 2 | 1 | 3 | 0 |

|         |    |             |             |   |   |   |   |
|---------|----|-------------|-------------|---|---|---|---|
| Case 63 | 14 | 77,873,878  | 93,707,850  | 3 | 1 | 4 | 0 |
| Case 63 | 14 | 93,708,224  | 94,200,784  | 2 | 1 | 3 | 0 |
| Case 63 | 14 | 94,200,936  | 94,689,200  | 3 | 1 | 4 | 0 |
| Case 63 | 14 | 94,708,257  | 94,843,818  | 2 | 1 | 3 | 0 |
| Case 63 | 14 | 94,844,843  | 102,323,220 | 3 | 1 | 4 | 0 |
| Case 63 | 14 | 102,328,945 | 103,215,234 | 3 | 0 | 3 | 1 |
| Case 63 | 14 | 103,218,818 | 103,290,938 | 4 | 0 | 4 | 1 |
| Case 63 | 14 | 103,291,031 | 104,640,120 | 3 | 1 | 4 | 0 |
| Case 63 | 14 | 104,640,582 | 104,666,821 | 2 | 1 | 3 | 0 |
| Case 63 | 14 | 104,673,221 | 104,838,191 | 3 | 1 | 4 | 0 |
| Case 63 | 14 | 104,839,816 | 105,965,245 | 3 | 0 | 3 | 1 |
| Case 63 | 14 | 105,970,176 | 107,287,663 | 3 | 1 | 4 | 0 |
| Case 63 | 15 | 20,034,919  | 22,652,330  | 2 | 1 | 3 | 0 |
| Case 63 | 15 | 22,750,305  | 43,891,364  | 1 | 1 | 2 | 0 |
| Case 63 | 15 | 43,892,807  | 43,931,102  | 0 | 0 | 0 | 0 |
| Case 63 | 15 | 43,931,858  | 45,361,227  | 1 | 1 | 2 | 0 |
| Case 63 | 15 | 45,361,247  | 45,450,323  | 2 | 1 | 3 | 0 |
| Case 63 | 15 | 45,453,075  | 51,546,298  | 1 | 1 | 2 | 0 |
| Case 63 | 15 | 51,548,310  | 52,186,103  | 2 | 1 | 3 | 0 |
| Case 63 | 15 | 52,188,668  | 64,775,002  | 1 | 1 | 2 | 0 |
| Case 63 | 15 | 64,791,920  | 65,298,496  | 2 | 1 | 3 | 0 |
| Case 63 | 15 | 65,298,672  | 78,779,384  | 1 | 1 | 2 | 0 |
| Case 63 | 15 | 78,780,104  | 79,006,582  | 2 | 1 | 3 | 0 |
| Case 63 | 15 | 79,019,024  | 89,902,032  | 1 | 1 | 2 | 0 |
| Case 63 | 15 | 89,919,052  | 90,761,651  | 2 | 1 | 3 | 0 |
| Case 63 | 15 | 90,763,025  | 91,395,711  | 1 | 1 | 2 | 0 |
| Case 63 | 15 | 91,404,788  | 91,517,878  | 2 | 1 | 3 | 0 |
| Case 63 | 15 | 91,521,337  | 99,654,696  | 1 | 1 | 2 | 0 |
| Case 63 | 15 | 99,654,880  | 99,674,750  | 2 | 1 | 3 | 0 |
| Case 63 | 15 | 99,675,028  | 102,461,162 | 1 | 1 | 2 | 0 |
| Case 63 | 16 | 88,165      | 230,538     | 2 | 1 | 3 | 0 |
| Case 63 | 16 | 230,721     | 633,386     | 1 | 1 | 2 | 0 |
| Case 63 | 16 | 633,399     | 705,125     | 2 | 1 | 3 | 0 |
| Case 63 | 16 | 705,128     | 1,842,516   | 1 | 1 | 2 | 0 |
| Case 63 | 16 | 1,849,916   | 2,130,189   | 2 | 1 | 3 | 0 |
| Case 63 | 16 | 2,130,190   | 2,287,867   | 1 | 1 | 2 | 0 |
| Case 63 | 16 | 2,288,345   | 4,386,814   | 2 | 1 | 3 | 0 |
| Case 63 | 16 | 4,386,960   | 4,440,593   | 1 | 1 | 2 | 0 |
| Case 63 | 16 | 4,440,828   | 11,447,272  | 2 | 1 | 3 | 0 |
| Case 63 | 16 | 11,458,800  | 11,624,245  | 2 | 2 | 4 | 0 |
| Case 63 | 16 | 11,627,587  | 14,586,821  | 2 | 1 | 3 | 0 |
| Case 63 | 16 | 14,618,311  | 19,280,924  | 3 | 1 | 4 | 0 |
| Case 63 | 16 | 19,288,435  | 20,441,013  | 5 | 0 | 5 | 1 |
| Case 63 | 16 | 20,441,020  | 20,471,450  | 4 | 0 | 4 | 1 |
| Case 63 | 16 | 20,478,724  | 20,809,283  | 6 | 0 | 6 | 1 |
| Case 63 | 16 | 20,809,303  | 21,317,295  | 7 | 0 | 7 | 1 |
| Case 63 | 16 | 21,608,472  | 33,460,718  | 2 | 1 | 3 | 0 |
| Case 63 | 16 | 33,557,021  | 35,285,582  | 1 | 1 | 2 | 0 |
| Case 63 | 16 | 46,450,037  | 46,655,234  | 1 | 1 | 2 | 0 |
| Case 63 | 16 | 46,662,987  | 75,095,695  | 2 | 1 | 3 | 0 |
| Case 63 | 16 | 75,102,952  | 75,448,587  | 3 | 1 | 4 | 0 |
| Case 63 | 16 | 75,467,223  | 78,837,743  | 2 | 1 | 3 | 0 |
| Case 63 | 16 | 78,837,772  | 79,196,789  | 2 | 0 | 2 | 1 |
| Case 63 | 16 | 79,199,110  | 81,170,741  | 2 | 1 | 3 | 0 |
| Case 63 | 16 | 81,171,069  | 81,171,635  | 1 | 1 | 2 | 0 |
| Case 63 | 16 | 81,172,338  | 81,175,103  | 0 | 0 | 0 | 0 |
| Case 63 | 16 | 81,180,988  | 81,180,988  | 1 | 1 | 2 | 0 |
| Case 63 | 16 | 81,180,995  | 84,228,770  | 2 | 1 | 3 | 0 |
| Case 63 | 16 | 84,228,798  | 84,234,231  | 1 | 1 | 2 | 0 |
| Case 63 | 16 | 84,234,740  | 88,482,758  | 2 | 1 | 3 | 0 |
| Case 63 | 16 | 88,490,418  | 88,967,053  | 1 | 1 | 2 | 0 |

|         |    |            |            |   |   |   |   |
|---------|----|------------|------------|---|---|---|---|
| Case 63 | 16 | 88,967,923 | 89,294,044 | 2 | 1 | 3 | 0 |
| Case 63 | 16 | 89,294,184 | 89,567,014 | 1 | 1 | 2 | 0 |
| Case 63 | 16 | 89,569,215 | 90,274,695 | 2 | 1 | 3 | 0 |
| Case 63 | 17 | 11,885     | 602,613    | 2 | 0 | 2 | 1 |
| Case 63 | 17 | 608,209    | 861,226    | 4 | 0 | 4 | 1 |
| Case 63 | 17 | 863,462    | 1,371,570  | 5 | 0 | 5 | 1 |
| Case 63 | 17 | 1,372,839  | 1,648,294  | 4 | 0 | 4 | 1 |
| Case 63 | 17 | 1,648,502  | 1,859,530  | 3 | 0 | 3 | 1 |
| Case 63 | 17 | 1,860,638  | 3,834,598  | 4 | 0 | 4 | 1 |
| Case 63 | 17 | 3,840,055  | 4,120,933  | 3 | 0 | 3 | 1 |
| Case 63 | 17 | 4,138,937  | 4,434,030  | 4 | 0 | 4 | 1 |
| Case 63 | 17 | 4,436,273  | 4,455,763  | 2 | 1 | 3 | 0 |
| Case 63 | 17 | 4,455,873  | 7,240,106  | 4 | 0 | 4 | 1 |
| Case 63 | 17 | 7,245,267  | 8,274,755  | 3 | 0 | 3 | 1 |
| Case 63 | 17 | 8,275,023  | 10,265,218 | 4 | 0 | 4 | 1 |
| Case 63 | 17 | 10,265,366 | 10,450,808 | 2 | 1 | 3 | 0 |
| Case 63 | 17 | 10,452,313 | 11,515,208 | 4 | 0 | 4 | 1 |
| Case 63 | 17 | 11,516,460 | 11,666,930 | 2 | 1 | 3 | 0 |
| Case 63 | 17 | 11,670,595 | 11,843,782 | 4 | 0 | 4 | 1 |
| Case 63 | 17 | 11,845,741 | 12,031,147 | 2 | 1 | 3 | 0 |
| Case 63 | 17 | 12,037,808 | 17,680,719 | 4 | 0 | 4 | 1 |
| Case 63 | 17 | 17,681,537 | 17,696,755 | 3 | 1 | 4 | 0 |
| Case 63 | 17 | 17,696,778 | 18,638,214 | 3 | 0 | 3 | 1 |
| Case 63 | 17 | 18,640,784 | 19,699,121 | 4 | 0 | 4 | 1 |
| Case 63 | 17 | 19,700,933 | 20,650,146 | 2 | 1 | 3 | 0 |
| Case 63 | 17 | 20,652,329 | 22,242,355 | 4 | 0 | 4 | 1 |
| Case 63 | 17 | 25,268,142 | 25,295,032 | 4 | 0 | 4 | 1 |
| Case 63 | 17 | 25,329,949 | 26,095,730 | 3 | 2 | 5 | 0 |
| Case 63 | 17 | 26,096,073 | 34,431,360 | 2 | 2 | 4 | 0 |
| Case 63 | 17 | 34,432,735 | 34,436,708 | 2 | 1 | 3 | 0 |
| Case 63 | 17 | 34,443,811 | 34,468,886 | 4 | 1 | 5 | 0 |
| Case 63 | 17 | 34,476,396 | 34,893,203 | 2 | 1 | 3 | 0 |
| Case 63 | 17 | 34,893,242 | 36,244,358 | 2 | 2 | 4 | 0 |
| Case 63 | 17 | 36,307,189 | 36,483,477 | 4 | 1 | 5 | 0 |
| Case 63 | 17 | 36,483,522 | 37,565,523 | 5 | 1 | 6 | 0 |
| Case 63 | 17 | 37,565,662 | 37,610,123 | 4 | 2 | 6 | 0 |
| Case 63 | 17 | 37,616,337 | 37,627,424 | 4 | 1 | 5 | 0 |
| Case 63 | 17 | 37,627,837 | 37,682,657 | 3 | 1 | 4 | 0 |
| Case 63 | 17 | 37,686,920 | 39,959,433 | 7 | 0 | 7 | 1 |
| Case 63 | 17 | 39,965,958 | 41,622,705 | 2 | 1 | 3 | 0 |
| Case 63 | 17 | 41,622,970 | 41,829,296 | 4 | 1 | 5 | 0 |
| Case 63 | 17 | 41,835,215 | 42,270,977 | 4 | 0 | 4 | 1 |
| Case 63 | 17 | 42,272,470 | 45,384,950 | 2 | 1 | 3 | 0 |
| Case 63 | 17 | 45,384,951 | 45,878,845 | 2 | 2 | 4 | 0 |
| Case 63 | 17 | 45,880,748 | 48,078,949 | 2 | 1 | 3 | 0 |
| Case 63 | 17 | 48,083,846 | 49,035,711 | 4 | 0 | 4 | 1 |
| Case 63 | 17 | 49,038,352 | 62,611,219 | 2 | 1 | 3 | 0 |
| Case 63 | 17 | 62,616,970 | 62,856,881 | 4 | 1 | 5 | 0 |
| Case 63 | 17 | 62,932,682 | 65,908,292 | 2 | 1 | 3 | 0 |
| Case 63 | 17 | 65,909,017 | 73,870,977 | 2 | 2 | 4 | 0 |
| Case 63 | 17 | 73,871,467 | 74,077,797 | 2 | 1 | 3 | 0 |
| Case 63 | 17 | 74,077,830 | 76,134,452 | 2 | 2 | 4 | 0 |
| Case 63 | 17 | 76,134,467 | 76,245,469 | 3 | 2 | 5 | 0 |
| Case 63 | 17 | 76,246,294 | 77,844,799 | 2 | 2 | 4 | 0 |
| Case 63 | 17 | 77,846,933 | 78,109,804 | 3 | 1 | 4 | 0 |
| Case 63 | 17 | 78,111,288 | 78,972,916 | 2 | 2 | 4 | 0 |
| Case 63 | 17 | 78,972,930 | 79,077,377 | 2 | 1 | 3 | 0 |
| Case 63 | 17 | 79,077,746 | 79,683,879 | 3 | 1 | 4 | 0 |
| Case 63 | 17 | 79,683,880 | 81,060,040 | 2 | 1 | 3 | 0 |
| Case 63 | 18 | 87,505     | 2,377,088  | 2 | 1 | 3 | 0 |
| Case 63 | 18 | 2,382,377  | 2,771,588  | 2 | 0 | 2 | 1 |

|         |    |            |            |   |   |   |   |
|---------|----|------------|------------|---|---|---|---|
| Case 63 | 18 | 2,788,323  | 3,215,158  | 2 | 1 | 3 | 0 |
| Case 63 | 18 | 3,215,230  | 3,636,288  | 2 | 2 | 4 | 0 |
| Case 63 | 18 | 3,645,455  | 15,375,878 | 2 | 1 | 3 | 0 |
| Case 63 | 18 | 18,520,354 | 54,983,554 | 2 | 1 | 3 | 0 |
| Case 63 | 18 | 54,986,641 | 55,146,682 | 3 | 1 | 4 | 0 |
| Case 63 | 18 | 55,149,354 | 67,466,068 | 2 | 1 | 3 | 0 |
| Case 63 | 18 | 67,466,298 | 67,747,484 | 2 | 2 | 4 | 0 |
| Case 63 | 18 | 67,753,863 | 72,409,082 | 2 | 1 | 3 | 0 |
| Case 63 | 18 | 72,414,096 | 72,441,535 | 1 | 1 | 2 | 0 |
| Case 63 | 18 | 72,441,802 | 72,679,334 | 1 | 0 | 1 | 0 |
| Case 63 | 18 | 72,687,307 | 72,687,307 | 1 | 1 | 2 | 0 |
| Case 63 | 18 | 72,689,581 | 78,015,180 | 2 | 1 | 3 | 0 |
| Case 63 | 19 | 260,912    | 1,510,368  | 2 | 0 | 2 | 1 |
| Case 63 | 19 | 1,512,093  | 2,078,144  | 3 | 0 | 3 | 1 |
| Case 63 | 19 | 2,078,181  | 2,512,606  | 2 | 0 | 2 | 1 |
| Case 63 | 19 | 2,512,876  | 2,608,353  | 3 | 0 | 3 | 1 |
| Case 63 | 19 | 2,609,815  | 6,381,498  | 2 | 0 | 2 | 1 |
| Case 63 | 19 | 6,381,628  | 6,471,291  | 3 | 0 | 3 | 1 |
| Case 63 | 19 | 6,471,429  | 7,105,136  | 2 | 0 | 2 | 1 |
| Case 63 | 19 | 7,112,593  | 7,504,456  | 3 | 0 | 3 | 1 |
| Case 63 | 19 | 7,505,163  | 9,054,279  | 2 | 0 | 2 | 1 |
| Case 63 | 19 | 9,056,232  | 9,088,981  | 3 | 0 | 3 | 1 |
| Case 63 | 19 | 9,089,110  | 10,085,054 | 2 | 0 | 2 | 1 |
| Case 63 | 19 | 10,087,234 | 10,188,210 | 3 | 0 | 3 | 1 |
| Case 63 | 19 | 10,190,826 | 10,706,567 | 2 | 0 | 2 | 1 |
| Case 63 | 19 | 10,728,030 | 11,039,506 | 3 | 0 | 3 | 1 |
| Case 63 | 19 | 11,040,005 | 13,411,482 | 2 | 0 | 2 | 1 |
| Case 63 | 19 | 13,414,594 | 13,622,767 | 3 | 0 | 3 | 1 |
| Case 63 | 19 | 13,629,889 | 14,991,507 | 2 | 0 | 2 | 1 |
| Case 63 | 19 | 14,991,761 | 15,210,776 | 3 | 0 | 3 | 1 |
| Case 63 | 19 | 15,212,304 | 16,078,966 | 2 | 0 | 2 | 1 |
| Case 63 | 19 | 16,085,596 | 16,300,190 | 3 | 0 | 3 | 1 |
| Case 63 | 19 | 16,301,100 | 16,939,611 | 2 | 1 | 3 | 0 |
| Case 63 | 19 | 16,942,368 | 18,288,072 | 2 | 0 | 2 | 1 |
| Case 63 | 19 | 18,288,540 | 18,557,573 | 2 | 1 | 3 | 0 |
| Case 63 | 19 | 18,557,592 | 18,710,506 | 2 | 0 | 2 | 1 |
| Case 63 | 19 | 18,719,009 | 19,645,844 | 3 | 0 | 3 | 1 |
| Case 63 | 19 | 19,645,901 | 20,170,214 | 2 | 0 | 2 | 1 |
| Case 63 | 19 | 20,190,141 | 20,430,665 | 3 | 0 | 3 | 1 |
| Case 63 | 19 | 20,435,660 | 24,545,366 | 2 | 0 | 2 | 1 |
| Case 63 | 19 | 24,629,285 | 24,629,285 | 3 | 1 | 4 | 0 |
| Case 63 | 19 | 27,732,159 | 28,959,499 | 3 | 1 | 4 | 0 |
| Case 63 | 19 | 28,967,575 | 30,779,231 | 7 | 0 | 7 | 1 |
| Case 63 | 19 | 30,780,196 | 39,195,558 | 2 | 1 | 3 | 0 |
| Case 63 | 19 | 39,195,590 | 41,001,101 | 2 | 2 | 4 | 0 |
| Case 63 | 19 | 41,001,921 | 41,985,802 | 2 | 1 | 3 | 0 |
| Case 63 | 19 | 41,989,138 | 42,525,481 | 2 | 2 | 4 | 0 |
| Case 63 | 19 | 42,525,582 | 52,528,944 | 2 | 1 | 3 | 0 |
| Case 63 | 19 | 52,529,074 | 52,570,714 | 1 | 1 | 2 | 0 |
| Case 63 | 19 | 52,570,767 | 53,114,267 | 2 | 1 | 3 | 0 |
| Case 63 | 19 | 53,116,060 | 53,138,444 | 1 | 1 | 2 | 0 |
| Case 63 | 19 | 53,140,449 | 54,511,915 | 2 | 1 | 3 | 0 |
| Case 63 | 19 | 54,515,399 | 55,019,379 | 4 | 0 | 4 | 1 |
| Case 63 | 19 | 55,021,895 | 59,097,160 | 2 | 1 | 3 | 0 |
| Case 63 | 20 | 63,244     | 676,442    | 3 | 2 | 5 | 0 |
| Case 63 | 20 | 681,164    | 1,162,370  | 2 | 2 | 4 | 0 |
| Case 63 | 20 | 1,162,615  | 2,582,839  | 3 | 2 | 5 | 0 |
| Case 63 | 20 | 2,582,894  | 2,785,279  | 2 | 2 | 4 | 0 |
| Case 63 | 20 | 2,785,598  | 3,187,733  | 3 | 2 | 5 | 0 |
| Case 63 | 20 | 3,193,617  | 3,251,172  | 2 | 2 | 4 | 0 |
| Case 63 | 20 | 3,251,356  | 4,045,738  | 3 | 2 | 5 | 0 |

|         |    |            |            |   |   |   |   |
|---------|----|------------|------------|---|---|---|---|
| Case 63 | 20 | 4,047,486  | 4,236,557  | 2 | 2 | 4 | 0 |
| Case 63 | 20 | 4,241,647  | 4,595,503  | 3 | 2 | 5 | 0 |
| Case 63 | 20 | 4,596,392  | 5,200,227  | 2 | 2 | 4 | 0 |
| Case 63 | 20 | 5,203,917  | 14,205,048 | 3 | 2 | 5 | 0 |
| Case 63 | 20 | 14,236,785 | 14,307,005 | 3 | 1 | 4 | 0 |
| Case 63 | 20 | 14,307,012 | 14,772,789 | 2 | 2 | 4 | 0 |
| Case 63 | 20 | 14,776,552 | 15,110,701 | 3 | 2 | 5 | 0 |
| Case 63 | 20 | 15,111,138 | 15,141,959 | 3 | 1 | 4 | 0 |
| Case 63 | 20 | 15,143,185 | 15,215,964 | 2 | 1 | 3 | 0 |
| Case 63 | 20 | 15,219,500 | 15,392,473 | 3 | 1 | 4 | 0 |
| Case 63 | 20 | 15,393,297 | 15,406,124 | 2 | 2 | 4 | 0 |
| Case 63 | 20 | 15,411,170 | 24,763,867 | 3 | 2 | 5 | 0 |
| Case 63 | 20 | 24,764,183 | 26,072,582 | 2 | 2 | 4 | 0 |
| Case 63 | 20 | 26,078,211 | 26,293,985 | 3 | 2 | 5 | 0 |
| Case 63 | 20 | 29,425,357 | 29,960,767 | 3 | 2 | 5 | 0 |
| Case 63 | 20 | 29,960,801 | 29,992,741 | 3 | 1 | 4 | 0 |
| Case 63 | 20 | 29,992,847 | 30,619,682 | 4 | 1 | 5 | 0 |
| Case 63 | 20 | 30,621,098 | 31,673,846 | 3 | 1 | 4 | 0 |
| Case 63 | 20 | 31,673,875 | 32,040,491 | 4 | 1 | 5 | 0 |
| Case 63 | 20 | 32,065,436 | 32,384,844 | 3 | 1 | 4 | 0 |
| Case 63 | 20 | 32,393,000 | 32,784,494 | 4 | 1 | 5 | 0 |
| Case 63 | 20 | 32,795,026 | 33,356,353 | 2 | 2 | 4 | 0 |
| Case 63 | 20 | 33,356,388 | 34,746,826 | 3 | 2 | 5 | 0 |
| Case 63 | 20 | 34,770,269 | 36,156,369 | 2 | 2 | 4 | 0 |
| Case 63 | 20 | 36,160,716 | 36,618,621 | 3 | 2 | 5 | 0 |
| Case 63 | 20 | 36,619,481 | 36,816,105 | 2 | 2 | 4 | 0 |
| Case 63 | 20 | 36,817,151 | 36,921,185 | 3 | 2 | 5 | 0 |
| Case 63 | 20 | 36,921,857 | 40,283,343 | 2 | 2 | 4 | 0 |
| Case 63 | 20 | 40,285,506 | 40,707,937 | 3 | 2 | 5 | 0 |
| Case 63 | 20 | 40,708,234 | 41,729,903 | 2 | 2 | 4 | 0 |
| Case 63 | 20 | 41,731,202 | 42,091,357 | 3 | 2 | 5 | 0 |
| Case 63 | 20 | 42,094,474 | 42,355,331 | 2 | 2 | 4 | 0 |
| Case 63 | 20 | 42,355,753 | 42,885,823 | 3 | 2 | 5 | 0 |
| Case 63 | 20 | 42,885,925 | 43,257,796 | 2 | 2 | 4 | 0 |
| Case 63 | 20 | 43,260,694 | 43,344,039 | 3 | 2 | 5 | 0 |
| Case 63 | 20 | 43,347,291 | 43,893,276 | 2 | 2 | 4 | 0 |
| Case 63 | 20 | 43,897,362 | 43,922,584 | 3 | 2 | 5 | 0 |
| Case 63 | 20 | 43,922,637 | 44,149,193 | 3 | 1 | 4 | 0 |
| Case 63 | 20 | 44,161,080 | 44,477,103 | 2 | 2 | 4 | 0 |
| Case 63 | 20 | 44,477,137 | 44,507,214 | 3 | 2 | 5 | 0 |
| Case 63 | 20 | 44,507,385 | 44,577,623 | 3 | 1 | 4 | 0 |
| Case 63 | 20 | 44,577,868 | 45,021,740 | 2 | 2 | 4 | 0 |
| Case 63 | 20 | 45,024,280 | 46,095,649 | 3 | 2 | 5 | 0 |
| Case 63 | 20 | 46,097,599 | 46,337,940 | 2 | 2 | 4 | 0 |
| Case 63 | 20 | 46,340,506 | 46,626,758 | 3 | 2 | 5 | 0 |
| Case 63 | 20 | 46,630,708 | 46,922,625 | 2 | 2 | 4 | 0 |
| Case 63 | 20 | 46,923,061 | 47,240,794 | 3 | 2 | 5 | 0 |
| Case 63 | 20 | 47,241,358 | 48,830,265 | 2 | 2 | 4 | 0 |
| Case 63 | 20 | 48,836,248 | 49,138,049 | 3 | 2 | 5 | 0 |
| Case 63 | 20 | 49,144,283 | 50,449,214 | 2 | 2 | 4 | 0 |
| Case 63 | 20 | 50,453,628 | 51,869,389 | 3 | 2 | 5 | 0 |
| Case 63 | 20 | 51,870,106 | 51,924,497 | 2 | 2 | 4 | 0 |
| Case 63 | 20 | 51,925,509 | 52,161,111 | 3 | 2 | 5 | 0 |
| Case 63 | 20 | 52,164,278 | 52,250,781 | 2 | 2 | 4 | 0 |
| Case 63 | 20 | 52,250,876 | 54,752,084 | 3 | 2 | 5 | 0 |
| Case 63 | 20 | 54,754,377 | 56,531,018 | 2 | 2 | 4 | 0 |
| Case 63 | 20 | 56,531,238 | 56,684,153 | 3 | 2 | 5 | 0 |
| Case 63 | 20 | 56,691,649 | 57,373,340 | 2 | 2 | 4 | 0 |
| Case 63 | 20 | 57,374,243 | 57,415,110 | 3 | 2 | 5 | 0 |
| Case 63 | 20 | 57,415,525 | 57,934,675 | 2 | 2 | 4 | 0 |
| Case 63 | 20 | 57,935,066 | 58,031,052 | 3 | 2 | 5 | 0 |

|         |    |            |            |   |   |   |   |
|---------|----|------------|------------|---|---|---|---|
| Case 63 | 20 | 58,031,774 | 59,134,718 | 2 | 2 | 4 | 0 |
| Case 63 | 20 | 59,142,286 | 59,603,942 | 3 | 2 | 5 | 0 |
| Case 63 | 20 | 59,605,124 | 61,990,939 | 2 | 2 | 4 | 0 |
| Case 63 | 20 | 61,993,942 | 62,014,997 | 3 | 2 | 5 | 0 |
| Case 63 | 20 | 62,018,747 | 62,491,769 | 3 | 1 | 4 | 0 |
| Case 63 | 20 | 62,492,912 | 62,948,788 | 2 | 2 | 4 | 0 |
| Case 63 | 21 | 10,827,533 | 10,971,337 | 2 | 1 | 3 | 0 |
| Case 63 | 21 | 14,368,320 | 21,812,972 | 2 | 1 | 3 | 0 |
| Case 63 | 21 | 21,813,380 | 21,984,599 | 1 | 1 | 2 | 0 |
| Case 63 | 21 | 21,984,714 | 23,298,169 | 2 | 1 | 3 | 0 |
| Case 63 | 21 | 23,299,786 | 23,654,246 | 1 | 1 | 2 | 0 |
| Case 63 | 21 | 23,655,900 | 23,661,835 | 0 | 0 | 0 | 0 |
| Case 63 | 21 | 23,672,710 | 24,200,410 | 1 | 1 | 2 | 0 |
| Case 63 | 21 | 24,205,546 | 24,555,671 | 2 | 1 | 3 | 0 |
| Case 63 | 21 | 24,559,181 | 25,200,439 | 1 | 1 | 2 | 0 |
| Case 63 | 21 | 25,209,156 | 39,951,162 | 2 | 1 | 3 | 0 |
| Case 63 | 21 | 39,953,486 | 40,479,387 | 2 | 2 | 4 | 0 |
| Case 63 | 21 | 40,483,956 | 44,519,655 | 2 | 1 | 3 | 0 |
| Case 63 | 21 | 44,525,219 | 44,628,741 | 3 | 1 | 4 | 0 |
| Case 63 | 21 | 44,690,691 | 44,840,296 | 2 | 1 | 3 | 0 |
| Case 63 | 21 | 44,845,968 | 45,000,892 | 3 | 1 | 4 | 0 |
| Case 63 | 21 | 45,012,353 | 45,987,736 | 2 | 1 | 3 | 0 |
| Case 63 | 21 | 45,987,802 | 46,060,222 | 1 | 1 | 2 | 0 |
| Case 63 | 21 | 46,064,574 | 47,808,679 | 2 | 1 | 3 | 0 |
| Case 63 | 21 | 47,808,772 | 47,867,318 | 1 | 1 | 2 | 0 |
| Case 63 | 21 | 47,868,321 | 48,100,155 | 2 | 1 | 3 | 0 |
| Case 63 | 22 | 16,114,244 | 17,339,003 | 2 | 0 | 2 | 1 |
| Case 63 | 22 | 17,339,404 | 17,467,474 | 3 | 0 | 3 | 1 |
| Case 63 | 22 | 17,468,875 | 17,591,089 | 2 | 0 | 2 | 1 |
| Case 63 | 22 | 17,593,685 | 17,916,235 | 3 | 0 | 3 | 1 |
| Case 63 | 22 | 17,916,547 | 18,300,775 | 2 | 0 | 2 | 1 |
| Case 63 | 22 | 18,300,844 | 18,610,146 | 3 | 0 | 3 | 1 |
| Case 63 | 22 | 18,610,798 | 18,900,868 | 2 | 0 | 2 | 1 |
| Case 63 | 22 | 18,901,004 | 19,196,615 | 3 | 0 | 3 | 1 |
| Case 63 | 22 | 19,197,949 | 20,163,070 | 2 | 0 | 2 | 1 |
| Case 63 | 22 | 20,165,632 | 21,387,967 | 3 | 0 | 3 | 1 |
| Case 63 | 22 | 21,392,943 | 23,412,017 | 2 | 0 | 2 | 1 |
| Case 63 | 22 | 23,416,005 | 23,506,826 | 3 | 0 | 3 | 1 |
| Case 63 | 22 | 23,521,094 | 23,930,279 | 2 | 0 | 2 | 1 |
| Case 63 | 22 | 23,931,845 | 23,995,056 | 3 | 0 | 3 | 1 |
| Case 63 | 22 | 23,996,463 | 24,237,074 | 2 | 0 | 2 | 1 |
| Case 63 | 22 | 24,240,340 | 24,313,804 | 3 | 0 | 3 | 1 |
| Case 63 | 22 | 24,314,006 | 24,582,041 | 2 | 0 | 2 | 1 |
| Case 63 | 22 | 24,582,080 | 24,666,340 | 3 | 0 | 3 | 1 |
| Case 63 | 22 | 24,681,555 | 24,837,236 | 2 | 0 | 2 | 1 |
| Case 63 | 22 | 24,837,424 | 24,954,832 | 3 | 0 | 3 | 1 |
| Case 63 | 22 | 24,958,116 | 25,282,688 | 2 | 0 | 2 | 1 |
| Case 63 | 22 | 25,282,765 | 26,222,454 | 3 | 0 | 3 | 1 |
| Case 63 | 22 | 26,224,825 | 26,422,794 | 2 | 0 | 2 | 1 |
| Case 63 | 22 | 26,422,980 | 26,666,246 | 3 | 0 | 3 | 1 |
| Case 63 | 22 | 26,666,611 | 26,734,141 | 2 | 0 | 2 | 1 |
| Case 63 | 22 | 26,735,765 | 26,738,011 | 3 | 0 | 3 | 1 |
| Case 63 | 22 | 26,738,225 | 26,902,388 | 2 | 0 | 2 | 1 |
| Case 63 | 22 | 26,902,835 | 27,701,317 | 3 | 0 | 3 | 1 |
| Case 63 | 22 | 27,708,313 | 27,792,588 | 2 | 0 | 2 | 1 |
| Case 63 | 22 | 27,792,672 | 28,404,167 | 3 | 0 | 3 | 1 |
| Case 63 | 22 | 28,408,444 | 32,714,214 | 2 | 0 | 2 | 1 |
| Case 63 | 22 | 32,719,246 | 33,468,005 | 3 | 0 | 3 | 1 |
| Case 63 | 22 | 33,468,109 | 33,903,083 | 2 | 0 | 2 | 1 |
| Case 63 | 22 | 33,904,754 | 34,546,503 | 3 | 0 | 3 | 1 |
| Case 63 | 22 | 34,548,442 | 35,694,893 | 2 | 0 | 2 | 1 |

|         |    |             |             |   |   |   |   |
|---------|----|-------------|-------------|---|---|---|---|
| Case 63 | 22 | 35,711,098  | 37,153,727  | 3 | 0 | 3 | 1 |
| Case 63 | 22 | 37,154,413  | 38,988,344  | 2 | 0 | 2 | 1 |
| Case 63 | 22 | 38,991,393  | 39,082,174  | 3 | 0 | 3 | 1 |
| Case 63 | 22 | 39,085,085  | 39,320,828  | 2 | 0 | 2 | 1 |
| Case 63 | 22 | 39,322,264  | 39,712,936  | 3 | 0 | 3 | 1 |
| Case 63 | 22 | 39,714,440  | 40,059,828  | 2 | 0 | 2 | 1 |
| Case 63 | 22 | 40,061,683  | 40,137,410  | 3 | 0 | 3 | 1 |
| Case 63 | 22 | 40,137,600  | 41,169,975  | 2 | 0 | 2 | 1 |
| Case 63 | 22 | 41,169,984  | 42,151,555  | 3 | 0 | 3 | 1 |
| Case 63 | 22 | 42,152,988  | 42,518,426  | 2 | 0 | 2 | 1 |
| Case 63 | 22 | 42,522,638  | 42,694,220  | 3 | 0 | 3 | 1 |
| Case 63 | 22 | 42,696,005  | 42,965,644  | 2 | 0 | 2 | 1 |
| Case 63 | 22 | 42,968,465  | 43,270,819  | 3 | 0 | 3 | 1 |
| Case 63 | 22 | 43,275,082  | 43,627,949  | 2 | 0 | 2 | 1 |
| Case 63 | 22 | 43,631,352  | 43,843,065  | 3 | 0 | 3 | 1 |
| Case 63 | 22 | 43,845,708  | 44,459,445  | 2 | 0 | 2 | 1 |
| Case 63 | 22 | 44,466,550  | 44,577,150  | 3 | 0 | 3 | 1 |
| Case 63 | 22 | 44,579,253  | 44,753,508  | 2 | 0 | 2 | 1 |
| Case 63 | 22 | 44,756,673  | 45,182,084  | 3 | 0 | 3 | 1 |
| Case 63 | 22 | 45,182,361  | 45,276,346  | 2 | 0 | 2 | 1 |
| Case 63 | 22 | 45,277,702  | 45,437,092  | 3 | 0 | 3 | 1 |
| Case 63 | 22 | 45,438,091  | 45,894,122  | 2 | 0 | 2 | 1 |
| Case 63 | 22 | 45,897,997  | 46,079,215  | 3 | 0 | 3 | 1 |
| Case 63 | 22 | 46,083,024  | 46,581,505  | 2 | 0 | 2 | 1 |
| Case 63 | 22 | 46,582,741  | 46,930,313  | 3 | 0 | 3 | 1 |
| Case 63 | 22 | 46,930,318  | 48,445,221  | 2 | 0 | 2 | 1 |
| Case 63 | 22 | 48,448,031  | 48,538,763  | 3 | 0 | 3 | 1 |
| Case 63 | 22 | 48,539,054  | 49,749,712  | 2 | 0 | 2 | 1 |
| Case 63 | 22 | 49,750,406  | 49,930,455  | 3 | 0 | 3 | 1 |
| Case 63 | 22 | 49,932,138  | 51,195,728  | 2 | 0 | 2 | 1 |
| Case 64 | 1  | 82,154      | 82,154      | 1 | 1 | 2 | 0 |
| Case 64 | 1  | 752,566     | 854,250     | 4 | 0 | 4 | 1 |
| Case 64 | 1  | 861,349     | 1,221,459   | 1 | 1 | 2 | 0 |
| Case 64 | 1  | 1,221,530   | 1,275,882   | 1 | 0 | 1 | 0 |
| Case 64 | 1  | 1,275,883   | 111,531,126 | 1 | 1 | 2 | 0 |
| Case 64 | 1  | 111,543,527 | 111,789,004 | 2 | 0 | 2 | 1 |
| Case 64 | 1  | 111,789,610 | 121,346,616 | 1 | 1 | 2 | 0 |
| Case 64 | 1  | 142,649,718 | 146,634,514 | 1 | 1 | 2 | 0 |
| Case 64 | 1  | 146,638,152 | 147,807,277 | 2 | 1 | 3 | 0 |
| Case 64 | 1  | 147,808,631 | 152,327,377 | 1 | 1 | 2 | 0 |
| Case 64 | 1  | 152,327,404 | 153,913,699 | 2 | 1 | 3 | 0 |
| Case 64 | 1  | 153,914,514 | 154,326,279 | 1 | 1 | 2 | 0 |
| Case 64 | 1  | 154,326,366 | 156,462,848 | 2 | 1 | 3 | 0 |
| Case 64 | 1  | 156,472,214 | 156,838,333 | 1 | 1 | 2 | 0 |
| Case 64 | 1  | 156,838,353 | 157,402,121 | 2 | 1 | 3 | 0 |
| Case 64 | 1  | 157,402,171 | 159,103,988 | 1 | 1 | 2 | 0 |
| Case 64 | 1  | 159,116,681 | 160,302,298 | 2 | 1 | 3 | 0 |
| Case 64 | 1  | 160,303,416 | 186,120,461 | 1 | 1 | 2 | 0 |
| Case 64 | 1  | 186,121,996 | 186,281,696 | 2 | 1 | 3 | 0 |
| Case 64 | 1  | 186,282,840 | 219,867,194 | 1 | 1 | 2 | 0 |
| Case 64 | 1  | 219,867,786 | 222,456,692 | 2 | 1 | 3 | 0 |
| Case 64 | 1  | 222,466,162 | 224,156,739 | 1 | 1 | 2 | 0 |
| Case 64 | 1  | 224,216,822 | 226,933,722 | 2 | 1 | 3 | 0 |
| Case 64 | 1  | 226,947,468 | 228,139,672 | 1 | 1 | 2 | 0 |
| Case 64 | 1  | 228,140,460 | 228,602,361 | 2 | 0 | 2 | 1 |
| Case 64 | 1  | 228,602,452 | 232,953,612 | 2 | 1 | 3 | 0 |
| Case 64 | 1  | 232,954,826 | 234,529,570 | 1 | 1 | 2 | 0 |
| Case 64 | 1  | 234,531,009 | 235,115,509 | 2 | 1 | 3 | 0 |
| Case 64 | 1  | 235,117,291 | 238,690,302 | 1 | 1 | 2 | 0 |
| Case 64 | 1  | 238,693,830 | 240,933,895 | 2 | 1 | 3 | 0 |
| Case 64 | 1  | 240,934,837 | 241,854,809 | 3 | 1 | 4 | 0 |

|         |   |             |             |   |   |   |   |
|---------|---|-------------|-------------|---|---|---|---|
| Case 64 | 1 | 241,855,644 | 241,855,644 | 2 | 1 | 3 | 0 |
| Case 64 | 1 | 241,862,049 | 248,079,963 | 1 | 1 | 2 | 0 |
| Case 64 | 1 | 248,082,848 | 249,218,992 | 2 | 1 | 3 | 0 |
| Case 64 | 2 | 18,674      | 33,012      | 1 | 1 | 2 | 0 |
| Case 64 | 2 | 34,049      | 2,043,349   | 2 | 0 | 2 | 1 |
| Case 64 | 2 | 2,047,397   | 2,836,350   | 1 | 1 | 2 | 0 |
| Case 64 | 2 | 2,838,270   | 3,079,021   | 2 | 0 | 2 | 1 |
| Case 64 | 2 | 3,079,180   | 3,837,303   | 1 | 1 | 2 | 0 |
| Case 64 | 2 | 3,838,080   | 5,403,383   | 2 | 0 | 2 | 1 |
| Case 64 | 2 | 5,407,073   | 6,052,307   | 1 | 1 | 2 | 0 |
| Case 64 | 2 | 6,056,656   | 6,482,511   | 2 | 0 | 2 | 1 |
| Case 64 | 2 | 6,485,953   | 9,611,524   | 1 | 1 | 2 | 0 |
| Case 64 | 2 | 9,611,549   | 12,248,589  | 2 | 0 | 2 | 1 |
| Case 64 | 2 | 12,252,350  | 12,339,714  | 1 | 1 | 2 | 0 |
| Case 64 | 2 | 12,342,726  | 13,628,120  | 2 | 0 | 2 | 1 |
| Case 64 | 2 | 13,634,635  | 14,690,675  | 1 | 1 | 2 | 0 |
| Case 64 | 2 | 14,691,035  | 19,657,569  | 2 | 0 | 2 | 1 |
| Case 64 | 2 | 19,663,338  | 20,009,261  | 1 | 1 | 2 | 0 |
| Case 64 | 2 | 20,009,456  | 23,083,158  | 2 | 0 | 2 | 1 |
| Case 64 | 2 | 23,091,376  | 23,707,766  | 1 | 1 | 2 | 0 |
| Case 64 | 2 | 23,710,164  | 28,766,083  | 2 | 0 | 2 | 1 |
| Case 64 | 2 | 28,766,107  | 29,287,227  | 1 | 1 | 2 | 0 |
| Case 64 | 2 | 29,287,229  | 33,752,261  | 2 | 0 | 2 | 1 |
| Case 64 | 2 | 33,752,435  | 35,480,663  | 1 | 1 | 2 | 0 |
| Case 64 | 2 | 35,482,278  | 37,872,871  | 2 | 0 | 2 | 1 |
| Case 64 | 2 | 37,872,878  | 38,298,394  | 2 | 1 | 3 | 0 |
| Case 64 | 2 | 38,298,744  | 40,392,095  | 1 | 1 | 2 | 0 |
| Case 64 | 2 | 40,392,123  | 44,993,487  | 2 | 0 | 2 | 1 |
| Case 64 | 2 | 44,993,630  | 45,332,395  | 1 | 1 | 2 | 0 |
| Case 64 | 2 | 45,334,074  | 48,584,474  | 2 | 0 | 2 | 1 |
| Case 64 | 2 | 48,585,963  | 49,857,266  | 1 | 1 | 2 | 0 |
| Case 64 | 2 | 49,857,536  | 56,130,640  | 2 | 0 | 2 | 1 |
| Case 64 | 2 | 56,133,040  | 56,708,945  | 1 | 1 | 2 | 0 |
| Case 64 | 2 | 56,712,426  | 58,592,685  | 2 | 0 | 2 | 1 |
| Case 64 | 2 | 58,597,957  | 59,941,799  | 1 | 1 | 2 | 0 |
| Case 64 | 2 | 59,947,184  | 60,805,397  | 2 | 1 | 3 | 0 |
| Case 64 | 2 | 60,811,584  | 62,662,704  | 1 | 1 | 2 | 0 |
| Case 64 | 2 | 62,666,178  | 64,445,563  | 2 | 0 | 2 | 1 |
| Case 64 | 2 | 64,453,486  | 65,540,949  | 1 | 1 | 2 | 0 |
| Case 64 | 2 | 65,540,986  | 66,221,977  | 2 | 1 | 3 | 0 |
| Case 64 | 2 | 66,228,539  | 66,703,251  | 1 | 1 | 2 | 0 |
| Case 64 | 2 | 66,705,785  | 70,905,997  | 2 | 0 | 2 | 1 |
| Case 64 | 2 | 70,906,074  | 71,292,664  | 1 | 1 | 2 | 0 |
| Case 64 | 2 | 71,294,128  | 78,900,269  | 2 | 0 | 2 | 1 |
| Case 64 | 2 | 78,914,837  | 79,784,187  | 1 | 1 | 2 | 0 |
| Case 64 | 2 | 79,785,810  | 92,081,640  | 2 | 0 | 2 | 1 |
| Case 64 | 2 | 95,429,424  | 101,949,770 | 2 | 0 | 2 | 1 |
| Case 64 | 2 | 101,949,911 | 103,120,769 | 1 | 1 | 2 | 0 |
| Case 64 | 2 | 103,121,372 | 104,995,800 | 2 | 0 | 2 | 1 |
| Case 64 | 2 | 104,998,427 | 108,549,097 | 1 | 1 | 2 | 0 |
| Case 64 | 2 | 108,555,725 | 110,024,153 | 2 | 0 | 2 | 1 |
| Case 64 | 2 | 110,026,466 | 111,907,691 | 1 | 1 | 2 | 0 |
| Case 64 | 2 | 111,908,262 | 116,453,722 | 2 | 0 | 2 | 1 |
| Case 64 | 2 | 116,454,257 | 118,814,868 | 1 | 1 | 2 | 0 |
| Case 64 | 2 | 118,815,958 | 119,965,951 | 2 | 1 | 3 | 0 |
| Case 64 | 2 | 119,968,031 | 120,640,084 | 1 | 1 | 2 | 0 |
| Case 64 | 2 | 120,658,328 | 123,327,494 | 2 | 0 | 2 | 1 |
| Case 64 | 2 | 123,330,570 | 134,274,625 | 1 | 1 | 2 | 0 |
| Case 64 | 2 | 134,282,346 | 141,762,276 | 2 | 0 | 2 | 1 |
| Case 64 | 2 | 141,762,830 | 144,147,475 | 1 | 1 | 2 | 0 |
| Case 64 | 2 | 144,155,919 | 173,796,835 | 2 | 0 | 2 | 1 |



|         |   |             |             |   |   |   |   |
|---------|---|-------------|-------------|---|---|---|---|
| Case 64 | 2 | 173,801,439 | 174,769,344 | 2 | 1 | 3 | 0 |
| Case 64 | 2 | 174,772,446 | 204,245,066 | 2 | 0 | 2 | 1 |
| Case 64 | 2 | 204,253,608 | 207,310,135 | 2 | 1 | 3 | 0 |
| Case 64 | 2 | 207,310,170 | 213,929,286 | 2 | 0 | 2 | 1 |
| Case 64 | 2 | 213,933,250 | 215,546,304 | 1 | 1 | 2 | 0 |
| Case 64 | 2 | 215,562,577 | 220,697,602 | 2 | 0 | 2 | 1 |
| Case 64 | 2 | 220,698,125 | 222,211,083 | 1 | 1 | 2 | 0 |
| Case 64 | 2 | 222,213,043 | 225,266,040 | 2 | 0 | 2 | 1 |
| Case 64 | 2 | 225,266,139 | 228,010,257 | 1 | 1 | 2 | 0 |
| Case 64 | 2 | 228,012,150 | 228,925,898 | 2 | 0 | 2 | 1 |
| Case 64 | 2 | 228,928,690 | 231,118,186 | 1 | 1 | 2 | 0 |
| Case 64 | 2 | 231,119,264 | 238,863,455 | 2 | 0 | 2 | 1 |
| Case 64 | 2 | 238,867,059 | 240,858,490 | 1 | 1 | 2 | 0 |
| Case 64 | 2 | 240,862,048 | 243,048,760 | 2 | 0 | 2 | 1 |
| Case 64 | 3 | 61,495      | 90,442,925  | 1 | 1 | 2 | 0 |
| Case 64 | 3 | 93,537,290  | 197,838,262 | 1 | 1 | 2 | 0 |
| Case 64 | 4 | 71,566      | 1,643,123   | 1 | 1 | 2 | 0 |
| Case 64 | 4 | 1,643,204   | 2,307,121   | 1 | 0 | 1 | 0 |
| Case 64 | 4 | 2,307,177   | 49,620,898  | 1 | 1 | 2 | 0 |
| Case 64 | 4 | 52,697,856  | 69,859,702  | 1 | 1 | 2 | 0 |
| Case 64 | 4 | 69,860,688  | 70,463,854  | 1 | 0 | 1 | 0 |
| Case 64 | 4 | 70,464,413  | 133,703,268 | 1 | 1 | 2 | 0 |
| Case 64 | 4 | 133,707,298 | 137,124,831 | 1 | 0 | 1 | 0 |
| Case 64 | 4 | 137,136,262 | 161,366,230 | 1 | 1 | 2 | 0 |
| Case 64 | 4 | 161,366,623 | 162,080,425 | 1 | 0 | 1 | 0 |
| Case 64 | 4 | 162,082,401 | 190,963,766 | 1 | 1 | 2 | 0 |
| Case 64 | 5 | 38,139      | 25,419,907  | 1 | 1 | 2 | 0 |
| Case 64 | 5 | 25,420,089  | 26,942,758  | 1 | 0 | 1 | 0 |
| Case 64 | 5 | 26,944,286  | 46,399,093  | 1 | 1 | 2 | 0 |
| Case 64 | 5 | 49,457,282  | 140,553,663 | 1 | 1 | 2 | 0 |
| Case 64 | 5 | 140,553,664 | 140,558,618 | 4 | 0 | 4 | 1 |
| Case 64 | 5 | 140,559,849 | 180,693,127 | 1 | 1 | 2 | 0 |
| Case 64 | 6 | 108,666     | 20,546,703  | 1 | 1 | 2 | 0 |
| Case 64 | 6 | 20,546,745  | 20,940,379  | 2 | 1 | 3 | 0 |
| Case 64 | 6 | 20,943,232  | 32,449,411  | 1 | 1 | 2 | 0 |
| Case 64 | 6 | 32,450,089  | 32,657,578  | 2 | 0 | 2 | 1 |
| Case 64 | 6 | 32,658,079  | 43,484,912  | 1 | 1 | 2 | 0 |
| Case 64 | 6 | 43,485,090  | 43,501,664  | 4 | 0 | 4 | 1 |
| Case 64 | 6 | 43,512,034  | 58,752,089  | 1 | 1 | 2 | 0 |
| Case 64 | 6 | 61,891,118  | 170,980,171 | 1 | 1 | 2 | 0 |
| Case 64 | 7 | 44,935      | 58,019,061  | 1 | 1 | 2 | 0 |
| Case 64 | 7 | 61,056,053  | 89,611,841  | 1 | 1 | 2 | 0 |
| Case 64 | 7 | 89,621,311  | 89,976,051  | 2 | 1 | 3 | 0 |
| Case 64 | 7 | 89,979,227  | 149,486,333 | 1 | 1 | 2 | 0 |
| Case 64 | 7 | 149,486,367 | 149,522,165 | 1 | 0 | 1 | 0 |
| Case 64 | 7 | 149,522,366 | 159,119,486 | 1 | 1 | 2 | 0 |
| Case 64 | 8 | 164,984     | 6,909,881   | 1 | 1 | 2 | 0 |
| Case 64 | 8 | 6,911,732   | 8,235,180   | 1 | 0 | 1 | 0 |
| Case 64 | 8 | 8,235,191   | 43,791,691  | 1 | 1 | 2 | 0 |
| Case 64 | 8 | 46,886,735  | 94,915,411  | 1 | 1 | 2 | 0 |
| Case 64 | 8 | 94,922,985  | 95,299,950  | 2 | 1 | 3 | 0 |
| Case 64 | 8 | 95,303,456  | 96,739,885  | 1 | 1 | 2 | 0 |
| Case 64 | 8 | 96,742,830  | 97,339,251  | 2 | 1 | 3 | 0 |
| Case 64 | 8 | 97,342,090  | 101,934,971 | 1 | 1 | 2 | 0 |
| Case 64 | 8 | 101,937,057 | 103,071,053 | 2 | 1 | 3 | 0 |
| Case 64 | 8 | 103,071,366 | 124,734,801 | 1 | 1 | 2 | 0 |
| Case 64 | 8 | 124,741,583 | 131,833,036 | 2 | 1 | 3 | 0 |
| Case 64 | 8 | 131,835,318 | 146,293,414 | 1 | 1 | 2 | 0 |
| Case 64 | 9 | 46,587      | 29,309,713  | 1 | 1 | 2 | 0 |
| Case 64 | 9 | 29,313,166  | 31,004,169  | 1 | 0 | 1 | 0 |
| Case 64 | 9 | 31,018,578  | 46,944,322  | 1 | 1 | 2 | 0 |

|         |    |             |             |   |   |   |   |
|---------|----|-------------|-------------|---|---|---|---|
| Case 64 | 9  | 65,629,772  | 139,230,523 | 1 | 1 | 2 | 0 |
| Case 64 | 9  | 139,231,489 | 139,278,407 | 1 | 0 | 1 | 0 |
| Case 64 | 9  | 139,279,173 | 140,008,443 | 1 | 1 | 2 | 0 |
| Case 64 | 9  | 140,008,750 | 140,391,659 | 1 | 0 | 1 | 0 |
| Case 64 | 9  | 140,391,722 | 141,066,491 | 1 | 1 | 2 | 0 |
| Case 64 | 10 | 98,087      | 39,097,912  | 1 | 1 | 2 | 0 |
| Case 64 | 10 | 42,436,301  | 134,852,702 | 1 | 1 | 2 | 0 |
| Case 64 | 10 | 134,858,046 | 135,116,393 | 1 | 0 | 1 | 0 |
| Case 64 | 10 | 135,121,732 | 135,477,883 | 1 | 1 | 2 | 0 |
| Case 64 | 11 | 193,146     | 494,662     | 1 | 1 | 2 | 0 |
| Case 64 | 11 | 494,731     | 836,820     | 1 | 0 | 1 | 0 |
| Case 64 | 11 | 837,257     | 51,591,253  | 1 | 1 | 2 | 0 |
| Case 64 | 11 | 54,794,237  | 64,557,866  | 1 | 1 | 2 | 0 |
| Case 64 | 11 | 64,559,402  | 64,822,078  | 1 | 0 | 1 | 0 |
| Case 64 | 11 | 64,822,127  | 66,766,754  | 1 | 1 | 2 | 0 |
| Case 64 | 11 | 66,773,581  | 68,964,278  | 3 | 0 | 3 | 1 |
| Case 64 | 11 | 68,967,641  | 69,563,733  | 5 | 0 | 5 | 1 |
| Case 64 | 11 | 69,566,488  | 71,018,309  | 3 | 0 | 3 | 1 |
| Case 64 | 11 | 71,019,412  | 127,792,983 | 1 | 1 | 2 | 0 |
| Case 64 | 11 | 127,795,846 | 129,904,497 | 2 | 1 | 3 | 0 |
| Case 64 | 11 | 129,906,366 | 134,934,063 | 1 | 1 | 2 | 0 |
| Case 64 | 12 | 191,619     | 4,179,258   | 1 | 1 | 2 | 0 |
| Case 64 | 12 | 4,180,351   | 4,243,749   | 7 | 0 | 7 | 1 |
| Case 64 | 12 | 4,253,697   | 34,853,011  | 1 | 1 | 2 | 0 |
| Case 64 | 12 | 37,876,400  | 131,793,372 | 1 | 1 | 2 | 0 |
| Case 64 | 12 | 131,797,608 | 131,816,213 | 4 | 0 | 4 | 1 |
| Case 64 | 12 | 131,818,420 | 133,810,935 | 1 | 1 | 2 | 0 |
| Case 64 | 13 | 19,058,717  | 115,103,529 | 1 | 1 | 2 | 0 |
| Case 64 | 14 | 19,280,733  | 20,426,742  | 1 | 0 | 1 | 0 |
| Case 64 | 14 | 20,432,664  | 22,715,158  | 1 | 1 | 2 | 0 |
| Case 64 | 14 | 22,718,399  | 22,957,488  | 2 | 2 | 4 | 0 |
| Case 64 | 14 | 22,957,900  | 107,287,663 | 1 | 1 | 2 | 0 |
| Case 64 | 15 | 20,034,919  | 22,876,889  | 1 | 0 | 1 | 0 |
| Case 64 | 15 | 22,882,240  | 27,465,102  | 1 | 1 | 2 | 0 |
| Case 64 | 15 | 27,466,391  | 33,894,495  | 2 | 0 | 2 | 1 |
| Case 64 | 15 | 33,895,503  | 34,198,177  | 1 | 1 | 2 | 0 |
| Case 64 | 15 | 34,198,564  | 37,817,473  | 2 | 0 | 2 | 1 |
| Case 64 | 15 | 37,819,624  | 38,105,689  | 1 | 1 | 2 | 0 |
| Case 64 | 15 | 38,106,163  | 39,179,321  | 2 | 1 | 3 | 0 |
| Case 64 | 15 | 39,179,357  | 49,793,281  | 2 | 0 | 2 | 1 |
| Case 64 | 15 | 49,794,020  | 51,593,370  | 1 | 1 | 2 | 0 |
| Case 64 | 15 | 51,593,989  | 54,548,816  | 2 | 0 | 2 | 1 |
| Case 64 | 15 | 54,549,055  | 55,475,527  | 1 | 1 | 2 | 0 |
| Case 64 | 15 | 55,480,933  | 61,055,432  | 2 | 0 | 2 | 1 |
| Case 64 | 15 | 61,057,064  | 61,533,501  | 1 | 1 | 2 | 0 |
| Case 64 | 15 | 61,544,803  | 74,625,121  | 2 | 0 | 2 | 1 |
| Case 64 | 15 | 74,625,151  | 75,656,978  | 1 | 1 | 2 | 0 |
| Case 64 | 15 | 75,657,071  | 78,908,032  | 2 | 0 | 2 | 1 |
| Case 64 | 15 | 78,909,414  | 79,550,410  | 1 | 1 | 2 | 0 |
| Case 64 | 15 | 79,550,907  | 95,888,269  | 2 | 0 | 2 | 1 |
| Case 64 | 15 | 95,889,251  | 96,729,286  | 1 | 1 | 2 | 0 |
| Case 64 | 15 | 96,729,928  | 102,461,162 | 2 | 0 | 2 | 1 |
| Case 64 | 16 | 88,165      | 35,285,582  | 1 | 1 | 2 | 0 |
| Case 64 | 16 | 46,450,037  | 72,110,529  | 1 | 1 | 2 | 0 |
| Case 64 | 16 | 72,110,589  | 74,071,207  | 2 | 1 | 3 | 0 |
| Case 64 | 16 | 74,073,632  | 77,845,331  | 1 | 1 | 2 | 0 |
| Case 64 | 16 | 77,845,665  | 78,458,750  | 2 | 1 | 3 | 0 |
| Case 64 | 16 | 78,458,774  | 79,437,209  | 1 | 1 | 2 | 0 |
| Case 64 | 16 | 79,439,035  | 80,563,695  | 2 | 1 | 3 | 0 |
| Case 64 | 16 | 80,568,573  | 84,902,717  | 1 | 1 | 2 | 0 |
| Case 64 | 16 | 84,903,209  | 85,179,401  | 2 | 0 | 2 | 1 |

|         |    |            |            |   |   |   |   |
|---------|----|------------|------------|---|---|---|---|
| Case 64 | 16 | 85,179,660 | 90,274,695 | 1 | 1 | 2 | 0 |
| Case 64 | 17 | 11,885     | 22,242,355 | 1 | 1 | 2 | 0 |
| Case 64 | 17 | 25,268,142 | 25,444,829 | 1 | 1 | 2 | 0 |
| Case 64 | 17 | 25,446,389 | 25,923,170 | 2 | 0 | 2 | 1 |
| Case 64 | 17 | 25,924,596 | 37,101,228 | 1 | 1 | 2 | 0 |
| Case 64 | 17 | 37,101,367 | 37,830,282 | 2 | 0 | 2 | 1 |
| Case 64 | 17 | 37,830,888 | 57,334,510 | 1 | 1 | 2 | 0 |
| Case 64 | 17 | 57,335,131 | 58,638,515 | 2 | 0 | 2 | 1 |
| Case 64 | 17 | 58,641,118 | 67,084,341 | 1 | 1 | 2 | 0 |
| Case 64 | 17 | 67,084,360 | 67,502,138 | 2 | 0 | 2 | 1 |
| Case 64 | 17 | 67,513,003 | 68,499,953 | 1 | 1 | 2 | 0 |
| Case 64 | 17 | 68,506,237 | 69,008,416 | 2 | 0 | 2 | 1 |
| Case 64 | 17 | 69,009,434 | 70,299,817 | 1 | 1 | 2 | 0 |
| Case 64 | 17 | 70,299,958 | 70,534,472 | 2 | 1 | 3 | 0 |
| Case 64 | 17 | 70,538,293 | 73,748,568 | 1 | 1 | 2 | 0 |
| Case 64 | 17 | 73,748,643 | 74,004,817 | 1 | 0 | 1 | 0 |
| Case 64 | 17 | 74,004,839 | 79,094,162 | 1 | 1 | 2 | 0 |
| Case 64 | 17 | 79,094,438 | 79,621,160 | 1 | 0 | 1 | 0 |
| Case 64 | 17 | 79,622,899 | 81,060,040 | 1 | 1 | 2 | 0 |
| Case 64 | 18 | 87,505     | 15,375,878 | 1 | 1 | 2 | 0 |
| Case 64 | 18 | 18,520,354 | 78,015,180 | 1 | 1 | 2 | 0 |
| Case 64 | 19 | 260,912    | 428,608    | 1 | 1 | 2 | 0 |
| Case 64 | 19 | 430,690    | 2,430,232  | 1 | 0 | 1 | 0 |
| Case 64 | 19 | 2,431,272  | 3,511,709  | 1 | 1 | 2 | 0 |
| Case 64 | 19 | 3,523,055  | 5,497,748  | 1 | 0 | 1 | 0 |
| Case 64 | 19 | 5,499,247  | 8,038,656  | 1 | 1 | 2 | 0 |
| Case 64 | 19 | 8,039,726  | 8,203,091  | 1 | 0 | 1 | 0 |
| Case 64 | 19 | 8,203,106  | 9,226,017  | 1 | 1 | 2 | 0 |
| Case 64 | 19 | 9,226,055  | 10,089,269 | 1 | 0 | 1 | 0 |
| Case 64 | 19 | 10,091,365 | 11,501,240 | 1 | 1 | 2 | 0 |
| Case 64 | 19 | 11,502,291 | 12,589,174 | 1 | 0 | 1 | 0 |
| Case 64 | 19 | 12,589,502 | 13,678,320 | 1 | 1 | 2 | 0 |
| Case 64 | 19 | 13,680,764 | 14,203,542 | 1 | 0 | 1 | 0 |
| Case 64 | 19 | 14,208,782 | 15,564,993 | 1 | 1 | 2 | 0 |
| Case 64 | 19 | 15,565,046 | 16,842,052 | 2 | 0 | 2 | 1 |
| Case 64 | 19 | 16,843,244 | 17,575,302 | 1 | 1 | 2 | 0 |
| Case 64 | 19 | 17,575,610 | 24,629,285 | 2 | 0 | 2 | 1 |
| Case 64 | 19 | 27,732,159 | 28,238,570 | 2 | 0 | 2 | 1 |
| Case 64 | 19 | 28,243,423 | 58,453,505 | 1 | 1 | 2 | 0 |
| Case 64 | 19 | 58,453,949 | 59,021,337 | 2 | 1 | 3 | 0 |
| Case 64 | 19 | 59,021,347 | 59,097,160 | 1 | 1 | 2 | 0 |
| Case 64 | 20 | 63,244     | 16,500,093 | 1 | 1 | 2 | 0 |
| Case 64 | 20 | 16,506,016 | 16,844,694 | 2 | 1 | 3 | 0 |
| Case 64 | 20 | 16,845,525 | 26,293,985 | 1 | 1 | 2 | 0 |
| Case 64 | 20 | 29,425,357 | 29,847,314 | 1 | 1 | 2 | 0 |
| Case 64 | 20 | 29,847,402 | 34,830,651 | 2 | 1 | 3 | 0 |
| Case 64 | 20 | 34,832,666 | 35,696,572 | 1 | 1 | 2 | 0 |
| Case 64 | 20 | 35,696,591 | 39,577,602 | 2 | 1 | 3 | 0 |
| Case 64 | 20 | 39,577,742 | 40,029,749 | 1 | 1 | 2 | 0 |
| Case 64 | 20 | 40,031,293 | 54,566,060 | 2 | 1 | 3 | 0 |
| Case 64 | 20 | 54,569,075 | 55,261,684 | 1 | 1 | 2 | 0 |
| Case 64 | 20 | 55,267,300 | 60,598,060 | 2 | 1 | 3 | 0 |
| Case 64 | 20 | 60,621,202 | 62,948,788 | 1 | 1 | 2 | 0 |
| Case 64 | 21 | 10,827,533 | 10,971,337 | 1 | 0 | 1 | 0 |
| Case 64 | 21 | 14,368,320 | 15,863,974 | 1 | 0 | 1 | 0 |
| Case 64 | 21 | 15,864,345 | 19,162,434 | 1 | 1 | 2 | 0 |
| Case 64 | 21 | 19,163,707 | 26,332,318 | 1 | 0 | 1 | 0 |
| Case 64 | 21 | 26,339,692 | 34,180,921 | 1 | 1 | 2 | 0 |
| Case 64 | 21 | 34,183,884 | 36,125,530 | 3 | 0 | 3 | 1 |
| Case 64 | 21 | 36,125,597 | 47,551,909 | 1 | 1 | 2 | 0 |
| Case 64 | 21 | 47,551,934 | 48,100,155 | 1 | 0 | 1 | 0 |

|         |    |             |             |   |   |   |   |
|---------|----|-------------|-------------|---|---|---|---|
| Case 64 | 22 | 16,114,244  | 24,919,586  | 1 | 1 | 2 | 0 |
| Case 64 | 22 | 24,919,647  | 25,187,544  | 2 | 0 | 2 | 1 |
| Case 64 | 22 | 25,189,055  | 38,042,916  | 1 | 1 | 2 | 0 |
| Case 64 | 22 | 38,042,938  | 38,487,029  | 1 | 0 | 1 | 0 |
| Case 64 | 22 | 38,492,883  | 50,621,268  | 1 | 1 | 2 | 0 |
| Case 64 | 22 | 50,625,166  | 50,943,389  | 1 | 0 | 1 | 0 |
| Case 64 | 22 | 50,943,423  | 51,195,728  | 1 | 1 | 2 | 0 |
| Case 65 | 1  | 82,154      | 4,981,107   | 2 | 1 | 3 | 0 |
| Case 65 | 1  | 4,981,503   | 6,411,024   | 2 | 0 | 2 | 1 |
| Case 65 | 1  | 6,414,084   | 93,142,719  | 2 | 1 | 3 | 0 |
| Case 65 | 1  | 93,142,746  | 94,115,299  | 2 | 0 | 2 | 1 |
| Case 65 | 1  | 94,118,883  | 121,346,616 | 2 | 1 | 3 | 0 |
| Case 65 | 1  | 142,649,718 | 249,218,992 | 2 | 1 | 3 | 0 |
| Case 65 | 2  | 18,674      | 66,953,286  | 2 | 2 | 4 | 0 |
| Case 65 | 2  | 66,954,363  | 67,515,512  | 3 | 0 | 3 | 1 |
| Case 65 | 2  | 67,520,850  | 68,342,443  | 2 | 0 | 2 | 1 |
| Case 65 | 2  | 68,343,030  | 89,931,911  | 2 | 2 | 4 | 0 |
| Case 65 | 2  | 90,010,895  | 92,081,640  | 2 | 0 | 2 | 1 |
| Case 65 | 2  | 95,429,424  | 95,440,352  | 2 | 0 | 2 | 1 |
| Case 65 | 2  | 95,444,917  | 126,477,788 | 2 | 2 | 4 | 0 |
| Case 65 | 2  | 126,488,824 | 127,905,004 | 2 | 0 | 2 | 1 |
| Case 65 | 2  | 127,905,440 | 137,506,665 | 2 | 2 | 4 | 0 |
| Case 65 | 2  | 137,508,544 | 137,980,318 | 2 | 0 | 2 | 1 |
| Case 65 | 2  | 137,981,047 | 243,048,760 | 2 | 2 | 4 | 0 |
| Case 65 | 3  | 61,495      | 172,906     | 2 | 2 | 4 | 0 |
| Case 65 | 3  | 174,816     | 710,880     | 2 | 0 | 2 | 1 |
| Case 65 | 3  | 712,551     | 50,513,553  | 2 | 2 | 4 | 0 |
| Case 65 | 3  | 50,513,566  | 50,968,897  | 2 | 1 | 3 | 0 |
| Case 65 | 3  | 50,998,816  | 52,116,714  | 2 | 2 | 4 | 0 |
| Case 65 | 3  | 52,121,297  | 55,059,102  | 3 | 0 | 3 | 1 |
| Case 65 | 3  | 55,062,852  | 56,307,703  | 2 | 0 | 2 | 1 |
| Case 65 | 3  | 56,320,980  | 57,235,585  | 3 | 0 | 3 | 1 |
| Case 65 | 3  | 57,237,221  | 57,961,370  | 2 | 0 | 2 | 1 |
| Case 65 | 3  | 57,965,749  | 58,061,608  | 3 | 0 | 3 | 1 |
| Case 65 | 3  | 58,062,775  | 59,741,758  | 2 | 2 | 4 | 0 |
| Case 65 | 3  | 59,749,703  | 60,066,360  | 2 | 0 | 2 | 1 |
| Case 65 | 3  | 60,069,722  | 90,442,925  | 2 | 2 | 4 | 0 |
| Case 65 | 3  | 93,537,290  | 197,838,262 | 2 | 2 | 4 | 0 |
| Case 65 | 4  | 71,566      | 331,372     | 2 | 2 | 4 | 0 |
| Case 65 | 4  | 333,310     | 437,166     | 2 | 0 | 2 | 1 |
| Case 65 | 4  | 437,720     | 49,620,898  | 2 | 2 | 4 | 0 |
| Case 65 | 4  | 52,697,856  | 55,564,644  | 2 | 2 | 4 | 0 |
| Case 65 | 4  | 55,565,445  | 55,992,366  | 3 | 0 | 3 | 1 |
| Case 65 | 4  | 55,997,340  | 57,176,832  | 2 | 0 | 2 | 1 |
| Case 65 | 4  | 57,178,227  | 57,687,304  | 3 | 0 | 3 | 1 |
| Case 65 | 4  | 57,690,713  | 74,605,532  | 2 | 0 | 2 | 1 |
| Case 65 | 4  | 74,606,375  | 75,993,726  | 3 | 0 | 3 | 1 |
| Case 65 | 4  | 75,996,025  | 77,317,124  | 2 | 0 | 2 | 1 |
| Case 65 | 4  | 77,317,607  | 77,660,829  | 3 | 0 | 3 | 1 |
| Case 65 | 4  | 77,660,860  | 78,106,441  | 2 | 0 | 2 | 1 |
| Case 65 | 4  | 78,115,334  | 79,396,667  | 3 | 0 | 3 | 1 |
| Case 65 | 4  | 79,398,481  | 88,707,081  | 2 | 0 | 2 | 1 |
| Case 65 | 4  | 88,709,783  | 89,023,224  | 3 | 0 | 3 | 1 |
| Case 65 | 4  | 89,026,109  | 90,125,419  | 2 | 0 | 2 | 1 |
| Case 65 | 4  | 90,126,051  | 90,674,431  | 3 | 0 | 3 | 1 |
| Case 65 | 4  | 90,678,541  | 91,469,221  | 2 | 0 | 2 | 1 |
| Case 65 | 4  | 91,475,787  | 91,591,467  | 0 | 0 | 0 | 0 |
| Case 65 | 4  | 91,606,389  | 96,294,936  | 2 | 0 | 2 | 1 |
| Case 65 | 4  | 96,295,569  | 96,388,651  | 3 | 0 | 3 | 1 |
| Case 65 | 4  | 96,390,834  | 111,265,491 | 2 | 0 | 2 | 1 |
| Case 65 | 4  | 111,267,671 | 111,968,478 | 3 | 0 | 3 | 1 |

|         |   |             |             |   |   |   |   |
|---------|---|-------------|-------------|---|---|---|---|
| Case 65 | 4 | 111,980,281 | 120,192,469 | 2 | 0 | 2 | 1 |
| Case 65 | 4 | 120,192,525 | 120,775,448 | 3 | 0 | 3 | 1 |
| Case 65 | 4 | 120,776,279 | 139,300,738 | 2 | 0 | 2 | 1 |
| Case 65 | 4 | 139,301,684 | 141,231,258 | 3 | 0 | 3 | 1 |
| Case 65 | 4 | 141,234,930 | 146,501,892 | 2 | 0 | 2 | 1 |
| Case 65 | 4 | 146,503,099 | 147,454,992 | 3 | 0 | 3 | 1 |
| Case 65 | 4 | 147,464,245 | 148,025,559 | 2 | 0 | 2 | 1 |
| Case 65 | 4 | 148,029,669 | 148,440,625 | 3 | 0 | 3 | 1 |
| Case 65 | 4 | 148,441,139 | 153,945,320 | 2 | 0 | 2 | 1 |
| Case 65 | 4 | 153,946,010 | 154,017,964 | 3 | 0 | 3 | 1 |
| Case 65 | 4 | 154,020,068 | 154,769,052 | 2 | 0 | 2 | 1 |
| Case 65 | 4 | 154,769,597 | 155,451,527 | 3 | 0 | 3 | 1 |
| Case 65 | 4 | 155,451,759 | 164,436,508 | 2 | 0 | 2 | 1 |
| Case 65 | 4 | 164,436,515 | 164,865,947 | 3 | 0 | 3 | 1 |
| Case 65 | 4 | 164,870,129 | 166,591,321 | 2 | 0 | 2 | 1 |
| Case 65 | 4 | 166,592,304 | 167,259,818 | 3 | 0 | 3 | 1 |
| Case 65 | 4 | 167,263,766 | 168,798,179 | 2 | 0 | 2 | 1 |
| Case 65 | 4 | 168,807,727 | 169,126,043 | 3 | 0 | 3 | 1 |
| Case 65 | 4 | 169,133,758 | 169,419,849 | 2 | 0 | 2 | 1 |
| Case 65 | 4 | 169,422,705 | 169,992,966 | 3 | 0 | 3 | 1 |
| Case 65 | 4 | 169,993,004 | 170,754,412 | 2 | 0 | 2 | 1 |
| Case 65 | 4 | 170,762,017 | 171,596,102 | 3 | 0 | 3 | 1 |
| Case 65 | 4 | 171,603,479 | 183,661,413 | 2 | 0 | 2 | 1 |
| Case 65 | 4 | 183,661,673 | 185,137,596 | 3 | 0 | 3 | 1 |
| Case 65 | 4 | 185,138,905 | 185,973,097 | 2 | 0 | 2 | 1 |
| Case 65 | 4 | 185,977,068 | 186,085,219 | 3 | 0 | 3 | 1 |
| Case 65 | 4 | 186,085,260 | 186,383,415 | 2 | 0 | 2 | 1 |
| Case 65 | 4 | 186,383,820 | 187,549,809 | 3 | 0 | 3 | 1 |
| Case 65 | 4 | 187,549,883 | 190,963,766 | 2 | 0 | 2 | 1 |
| Case 65 | 5 | 38,139      | 46,399,093  | 4 | 0 | 4 | 1 |
| Case 65 | 5 | 49,457,282  | 83,756,654  | 4 | 0 | 4 | 1 |
| Case 65 | 5 | 83,787,691  | 89,233,833  | 6 | 0 | 6 | 1 |
| Case 65 | 5 | 89,234,380  | 89,287,150  | 5 | 0 | 5 | 1 |
| Case 65 | 5 | 89,288,145  | 89,560,757  | 4 | 0 | 4 | 1 |
| Case 65 | 5 | 89,573,928  | 95,407,894  | 6 | 0 | 6 | 1 |
| Case 65 | 5 | 95,410,393  | 96,512,887  | 5 | 0 | 5 | 1 |
| Case 65 | 5 | 96,512,888  | 99,302,219  | 6 | 0 | 6 | 1 |
| Case 65 | 5 | 99,310,930  | 99,905,367  | 5 | 0 | 5 | 1 |
| Case 65 | 5 | 99,913,203  | 108,066,842 | 6 | 0 | 6 | 1 |
| Case 65 | 5 | 108,067,369 | 109,499,203 | 5 | 0 | 5 | 1 |
| Case 65 | 5 | 109,502,028 | 110,781,537 | 6 | 0 | 6 | 1 |
| Case 65 | 5 | 110,782,456 | 112,899,752 | 5 | 0 | 5 | 1 |
| Case 65 | 5 | 112,899,767 | 115,378,630 | 6 | 0 | 6 | 1 |
| Case 65 | 5 | 115,379,984 | 115,845,251 | 5 | 0 | 5 | 1 |
| Case 65 | 5 | 115,845,585 | 117,139,928 | 6 | 0 | 6 | 1 |
| Case 65 | 5 | 117,143,718 | 118,740,848 | 5 | 0 | 5 | 1 |
| Case 65 | 5 | 118,743,494 | 121,184,992 | 6 | 0 | 6 | 1 |
| Case 65 | 5 | 121,186,463 | 121,497,094 | 5 | 0 | 5 | 1 |
| Case 65 | 5 | 121,497,706 | 127,622,476 | 6 | 0 | 6 | 1 |
| Case 65 | 5 | 127,622,491 | 128,072,198 | 5 | 0 | 5 | 1 |
| Case 65 | 5 | 128,077,002 | 132,151,071 | 6 | 0 | 6 | 1 |
| Case 65 | 5 | 132,154,270 | 132,632,476 | 5 | 0 | 5 | 1 |
| Case 65 | 5 | 132,633,880 | 133,146,042 | 6 | 0 | 6 | 1 |
| Case 65 | 5 | 133,152,875 | 142,047,191 | 5 | 0 | 5 | 1 |
| Case 65 | 5 | 142,047,909 | 143,249,879 | 6 | 0 | 6 | 1 |
| Case 65 | 5 | 143,258,738 | 144,584,265 | 5 | 0 | 5 | 1 |
| Case 65 | 5 | 144,585,367 | 145,808,408 | 6 | 0 | 6 | 1 |
| Case 65 | 5 | 145,815,073 | 146,033,408 | 5 | 0 | 5 | 1 |
| Case 65 | 5 | 146,034,749 | 147,714,496 | 6 | 0 | 6 | 1 |
| Case 65 | 5 | 147,715,227 | 148,116,202 | 5 | 0 | 5 | 1 |
| Case 65 | 5 | 148,116,653 | 148,318,559 | 6 | 0 | 6 | 1 |

|         |   |             |             |   |   |   |   |
|---------|---|-------------|-------------|---|---|---|---|
| Case 65 | 5 | 148,321,436 | 153,857,396 | 5 | 0 | 5 | 1 |
| Case 65 | 5 | 153,857,407 | 154,142,057 | 6 | 0 | 6 | 1 |
| Case 65 | 5 | 154,145,474 | 157,159,971 | 5 | 0 | 5 | 1 |
| Case 65 | 5 | 157,161,603 | 159,103,367 | 6 | 0 | 6 | 1 |
| Case 65 | 5 | 159,104,799 | 160,115,361 | 5 | 0 | 5 | 1 |
| Case 65 | 5 | 160,115,779 | 162,039,311 | 6 | 0 | 6 | 1 |
| Case 65 | 5 | 162,043,850 | 163,407,199 | 5 | 0 | 5 | 1 |
| Case 65 | 5 | 163,407,778 | 164,672,406 | 6 | 0 | 6 | 1 |
| Case 65 | 5 | 164,679,036 | 165,087,285 | 5 | 0 | 5 | 1 |
| Case 65 | 5 | 165,093,364 | 166,025,196 | 6 | 0 | 6 | 1 |
| Case 65 | 5 | 166,026,376 | 166,370,461 | 5 | 0 | 5 | 1 |
| Case 65 | 5 | 166,373,903 | 167,173,269 | 6 | 0 | 6 | 1 |
| Case 65 | 5 | 167,177,556 | 169,331,450 | 5 | 0 | 5 | 1 |
| Case 65 | 5 | 169,332,156 | 169,488,692 | 6 | 0 | 6 | 1 |
| Case 65 | 5 | 169,489,226 | 170,922,132 | 5 | 0 | 5 | 1 |
| Case 65 | 5 | 170,923,152 | 172,412,674 | 6 | 0 | 6 | 1 |
| Case 65 | 5 | 172,427,650 | 172,772,253 | 5 | 0 | 5 | 1 |
| Case 65 | 5 | 172,772,751 | 173,002,143 | 6 | 0 | 6 | 1 |
| Case 65 | 5 | 173,002,891 | 173,806,760 | 5 | 0 | 5 | 1 |
| Case 65 | 5 | 173,810,054 | 174,863,502 | 6 | 0 | 6 | 1 |
| Case 65 | 5 | 174,863,576 | 176,079,574 | 5 | 0 | 5 | 1 |
| Case 65 | 5 | 176,079,877 | 176,221,957 | 6 | 0 | 6 | 1 |
| Case 65 | 5 | 176,235,075 | 179,393,923 | 5 | 0 | 5 | 1 |
| Case 65 | 5 | 179,393,926 | 179,707,528 | 6 | 0 | 6 | 1 |
| Case 65 | 5 | 179,712,060 | 180,693,127 | 5 | 0 | 5 | 1 |
| Case 65 | 6 | 108,666     | 417,727     | 3 | 0 | 3 | 1 |
| Case 65 | 6 | 421,317     | 696,058     | 2 | 0 | 2 | 1 |
| Case 65 | 6 | 697,754     | 1,055,655   | 3 | 0 | 3 | 1 |
| Case 65 | 6 | 1,056,155   | 1,908,210   | 2 | 0 | 2 | 1 |
| Case 65 | 6 | 1,910,108   | 1,910,108   | 3 | 0 | 3 | 1 |
| Case 65 | 6 | 1,913,138   | 1,913,138   | 2 | 0 | 2 | 1 |
| Case 65 | 6 | 1,915,129   | 1,921,848   | 3 | 0 | 3 | 1 |
| Case 65 | 6 | 1,926,650   | 2,139,450   | 1 | 0 | 1 | 0 |
| Case 65 | 6 | 2,145,136   | 4,497,145   | 3 | 0 | 3 | 1 |
| Case 65 | 6 | 4,499,029   | 5,364,290   | 2 | 0 | 2 | 1 |
| Case 65 | 6 | 5,366,604   | 6,836,159   | 3 | 0 | 3 | 1 |
| Case 65 | 6 | 6,839,192   | 6,882,117   | 2 | 0 | 2 | 1 |
| Case 65 | 6 | 6,883,618   | 10,464,025  | 2 | 1 | 3 | 0 |
| Case 65 | 6 | 10,466,038  | 11,590,140  | 2 | 0 | 2 | 1 |
| Case 65 | 6 | 11,598,281  | 13,332,467  | 3 | 0 | 3 | 1 |
| Case 65 | 6 | 13,336,815  | 13,391,155  | 2 | 0 | 2 | 1 |
| Case 65 | 6 | 13,391,347  | 21,913,741  | 2 | 1 | 3 | 0 |
| Case 65 | 6 | 21,921,026  | 22,202,725  | 2 | 0 | 2 | 1 |
| Case 65 | 6 | 22,203,977  | 22,709,430  | 3 | 0 | 3 | 1 |
| Case 65 | 6 | 22,709,628  | 23,559,581  | 2 | 0 | 2 | 1 |
| Case 65 | 6 | 23,562,269  | 24,456,841  | 3 | 0 | 3 | 1 |
| Case 65 | 6 | 24,460,508  | 25,343,805  | 2 | 0 | 2 | 1 |
| Case 65 | 6 | 25,346,334  | 25,977,361  | 3 | 0 | 3 | 1 |
| Case 65 | 6 | 25,983,905  | 26,338,434  | 2 | 0 | 2 | 1 |
| Case 65 | 6 | 26,341,030  | 26,505,297  | 2 | 1 | 3 | 0 |
| Case 65 | 6 | 26,505,362  | 27,154,361  | 2 | 0 | 2 | 1 |
| Case 65 | 6 | 27,157,407  | 27,662,395  | 2 | 1 | 3 | 0 |
| Case 65 | 6 | 27,668,013  | 29,407,955  | 2 | 0 | 2 | 1 |
| Case 65 | 6 | 29,407,961  | 29,455,357  | 2 | 1 | 3 | 0 |
| Case 65 | 6 | 29,455,505  | 29,455,599  | 3 | 0 | 3 | 1 |
| Case 65 | 6 | 29,456,021  | 30,021,740  | 2 | 0 | 2 | 1 |
| Case 65 | 6 | 30,022,153  | 30,022,153  | 3 | 0 | 3 | 1 |
| Case 65 | 6 | 30,022,425  | 30,089,428  | 2 | 1 | 3 | 0 |
| Case 65 | 6 | 30,090,820  | 30,285,883  | 2 | 0 | 2 | 1 |
| Case 65 | 6 | 30,286,729  | 30,418,662  | 2 | 1 | 3 | 0 |
| Case 65 | 6 | 30,418,966  | 30,993,635  | 2 | 2 | 4 | 0 |

|         |   |             |             |   |   |   |   |
|---------|---|-------------|-------------|---|---|---|---|
| Case 65 | 6 | 30,993,776  | 31,257,012  | 2 | 1 | 3 | 0 |
| Case 65 | 6 | 31,257,622  | 32,188,640  | 2 | 2 | 4 | 0 |
| Case 65 | 6 | 32,188,727  | 34,004,293  | 2 | 1 | 3 | 0 |
| Case 65 | 6 | 34,006,958  | 34,008,464  | 3 | 0 | 3 | 1 |
| Case 65 | 6 | 34,015,765  | 34,153,441  | 2 | 0 | 2 | 1 |
| Case 65 | 6 | 34,158,331  | 35,994,088  | 3 | 0 | 3 | 1 |
| Case 65 | 6 | 36,006,220  | 36,075,219  | 2 | 0 | 2 | 1 |
| Case 65 | 6 | 36,075,326  | 36,422,789  | 2 | 1 | 3 | 0 |
| Case 65 | 6 | 36,432,705  | 36,976,637  | 2 | 2 | 4 | 0 |
| Case 65 | 6 | 36,976,649  | 42,890,602  | 2 | 1 | 3 | 0 |
| Case 65 | 6 | 42,890,858  | 42,930,827  | 2 | 0 | 2 | 1 |
| Case 65 | 6 | 42,931,340  | 44,526,440  | 3 | 0 | 3 | 1 |
| Case 65 | 6 | 44,533,311  | 46,658,792  | 2 | 0 | 2 | 1 |
| Case 65 | 6 | 46,658,819  | 47,340,783  | 3 | 0 | 3 | 1 |
| Case 65 | 6 | 47,345,847  | 47,649,222  | 2 | 0 | 2 | 1 |
| Case 65 | 6 | 47,649,265  | 48,162,231  | 3 | 0 | 3 | 1 |
| Case 65 | 6 | 48,205,919  | 49,819,844  | 2 | 0 | 2 | 1 |
| Case 65 | 6 | 49,823,814  | 52,585,532  | 3 | 0 | 3 | 1 |
| Case 65 | 6 | 52,586,253  | 52,975,039  | 2 | 0 | 2 | 1 |
| Case 65 | 6 | 52,976,317  | 53,960,803  | 3 | 0 | 3 | 1 |
| Case 65 | 6 | 53,961,513  | 58,752,089  | 2 | 0 | 2 | 1 |
| Case 65 | 6 | 61,891,118  | 105,991,031 | 2 | 0 | 2 | 1 |
| Case 65 | 6 | 105,991,917 | 106,905,415 | 3 | 0 | 3 | 1 |
| Case 65 | 6 | 106,907,560 | 106,987,370 | 2 | 0 | 2 | 1 |
| Case 65 | 6 | 106,988,018 | 108,121,953 | 3 | 0 | 3 | 1 |
| Case 65 | 6 | 108,127,875 | 108,975,562 | 2 | 0 | 2 | 1 |
| Case 65 | 6 | 108,981,117 | 109,274,276 | 3 | 0 | 3 | 1 |
| Case 65 | 6 | 109,274,381 | 110,729,270 | 2 | 0 | 2 | 1 |
| Case 65 | 6 | 110,729,973 | 110,851,976 | 3 | 0 | 3 | 1 |
| Case 65 | 6 | 110,853,510 | 111,784,919 | 2 | 0 | 2 | 1 |
| Case 65 | 6 | 111,809,796 | 112,773,200 | 3 | 0 | 3 | 1 |
| Case 65 | 6 | 112,775,377 | 133,014,231 | 2 | 0 | 2 | 1 |
| Case 65 | 6 | 133,014,623 | 133,481,191 | 3 | 0 | 3 | 1 |
| Case 65 | 6 | 133,481,445 | 136,471,800 | 2 | 0 | 2 | 1 |
| Case 65 | 6 | 136,475,578 | 136,760,581 | 3 | 0 | 3 | 1 |
| Case 65 | 6 | 136,765,459 | 143,057,547 | 2 | 0 | 2 | 1 |
| Case 65 | 6 | 143,058,408 | 143,332,882 | 3 | 0 | 3 | 1 |
| Case 65 | 6 | 143,333,317 | 150,226,059 | 2 | 0 | 2 | 1 |
| Case 65 | 6 | 150,232,879 | 150,558,985 | 3 | 0 | 3 | 1 |
| Case 65 | 6 | 150,561,826 | 151,670,338 | 2 | 0 | 2 | 1 |
| Case 65 | 6 | 151,670,449 | 151,790,003 | 3 | 0 | 3 | 1 |
| Case 65 | 6 | 151,790,096 | 152,293,905 | 2 | 0 | 2 | 1 |
| Case 65 | 6 | 152,298,435 | 152,510,466 | 3 | 0 | 3 | 1 |
| Case 65 | 6 | 152,511,420 | 154,727,538 | 2 | 0 | 2 | 1 |
| Case 65 | 6 | 154,727,599 | 155,760,195 | 3 | 0 | 3 | 1 |
| Case 65 | 6 | 155,761,124 | 157,405,930 | 2 | 0 | 2 | 1 |
| Case 65 | 6 | 157,406,462 | 158,510,956 | 3 | 0 | 3 | 1 |
| Case 65 | 6 | 158,510,970 | 159,458,022 | 2 | 0 | 2 | 1 |
| Case 65 | 6 | 159,458,024 | 160,635,886 | 2 | 1 | 3 | 0 |
| Case 65 | 6 | 160,637,192 | 161,875,189 | 2 | 2 | 4 | 0 |
| Case 65 | 6 | 161,882,221 | 166,662,128 | 2 | 0 | 2 | 1 |
| Case 65 | 6 | 166,665,154 | 168,440,753 | 3 | 0 | 3 | 1 |
| Case 65 | 6 | 168,440,832 | 169,039,497 | 2 | 0 | 2 | 1 |
| Case 65 | 6 | 169,039,594 | 169,451,803 | 3 | 0 | 3 | 1 |
| Case 65 | 6 | 169,454,921 | 170,980,171 | 2 | 0 | 2 | 1 |
| Case 65 | 7 | 44,935      | 715,722     | 3 | 0 | 3 | 1 |
| Case 65 | 7 | 716,867     | 57,488,782  | 2 | 2 | 4 | 0 |
| Case 65 | 7 | 57,491,887  | 58,019,061  | 2 | 1 | 3 | 0 |
| Case 65 | 7 | 61,056,053  | 65,300,423  | 2 | 1 | 3 | 0 |
| Case 65 | 7 | 65,326,821  | 100,490,980 | 2 | 2 | 4 | 0 |
| Case 65 | 7 | 100,490,981 | 100,685,727 | 3 | 0 | 3 | 1 |

|         |    |             |             |   |   |   |   |
|---------|----|-------------|-------------|---|---|---|---|
| Case 65 | 7  | 100,685,742 | 159,119,486 | 2 | 2 | 4 | 0 |
| Case 65 | 8  | 164,984     | 224,666     | 4 | 0 | 4 | 1 |
| Case 65 | 8  | 229,694     | 4,433,995   | 4 | 1 | 5 | 0 |
| Case 65 | 8  | 4,434,168   | 4,556,148   | 4 | 0 | 4 | 1 |
| Case 65 | 8  | 4,557,773   | 10,464,755  | 4 | 1 | 5 | 0 |
| Case 65 | 8  | 10,465,063  | 10,506,113  | 4 | 0 | 4 | 1 |
| Case 65 | 8  | 10,506,207  | 17,130,582  | 4 | 1 | 5 | 0 |
| Case 65 | 8  | 17,132,243  | 17,290,124  | 4 | 0 | 4 | 1 |
| Case 65 | 8  | 17,290,628  | 19,249,622  | 4 | 1 | 5 | 0 |
| Case 65 | 8  | 19,250,891  | 19,625,464  | 4 | 0 | 4 | 1 |
| Case 65 | 8  | 19,625,912  | 27,528,765  | 4 | 1 | 5 | 0 |
| Case 65 | 8  | 27,529,639  | 28,001,680  | 4 | 0 | 4 | 1 |
| Case 65 | 8  | 28,003,774  | 32,499,740  | 4 | 1 | 5 | 0 |
| Case 65 | 8  | 32,501,987  | 33,422,507  | 4 | 0 | 4 | 1 |
| Case 65 | 8  | 33,443,076  | 37,508,666  | 4 | 1 | 5 | 0 |
| Case 65 | 8  | 37,532,163  | 37,766,837  | 4 | 0 | 4 | 1 |
| Case 65 | 8  | 37,783,176  | 38,419,633  | 4 | 1 | 5 | 0 |
| Case 65 | 8  | 38,423,868  | 39,042,042  | 4 | 0 | 4 | 1 |
| Case 65 | 8  | 39,052,223  | 41,397,254  | 4 | 1 | 5 | 0 |
| Case 65 | 8  | 41,399,354  | 43,791,691  | 4 | 0 | 4 | 1 |
| Case 65 | 8  | 46,886,735  | 50,233,005  | 4 | 1 | 5 | 0 |
| Case 65 | 8  | 50,235,530  | 51,125,276  | 4 | 0 | 4 | 1 |
| Case 65 | 8  | 51,125,957  | 52,097,911  | 4 | 1 | 5 | 0 |
| Case 65 | 8  | 52,100,048  | 52,486,885  | 4 | 0 | 4 | 1 |
| Case 65 | 8  | 52,493,581  | 58,780,481  | 4 | 1 | 5 | 0 |
| Case 65 | 8  | 58,784,889  | 59,514,651  | 4 | 0 | 4 | 1 |
| Case 65 | 8  | 59,514,679  | 68,904,848  | 4 | 1 | 5 | 0 |
| Case 65 | 8  | 68,906,392  | 69,002,938  | 4 | 0 | 4 | 1 |
| Case 65 | 8  | 69,002,965  | 105,268,769 | 4 | 1 | 5 | 0 |
| Case 65 | 8  | 105,278,802 | 106,041,827 | 4 | 0 | 4 | 1 |
| Case 65 | 8  | 106,052,343 | 109,921,525 | 4 | 1 | 5 | 0 |
| Case 65 | 8  | 109,923,059 | 110,689,378 | 4 | 0 | 4 | 1 |
| Case 65 | 8  | 110,691,429 | 135,215,172 | 4 | 1 | 5 | 0 |
| Case 65 | 8  | 135,217,316 | 135,768,759 | 4 | 0 | 4 | 1 |
| Case 65 | 8  | 135,769,607 | 146,293,414 | 4 | 1 | 5 | 0 |
| Case 65 | 9  | 46,587      | 5,185,550   | 3 | 0 | 3 | 1 |
| Case 65 | 9  | 5,185,569   | 5,335,408   | 2 | 0 | 2 | 1 |
| Case 65 | 9  | 5,335,470   | 6,170,162   | 3 | 0 | 3 | 1 |
| Case 65 | 9  | 6,176,770   | 6,695,397   | 1 | 0 | 1 | 0 |
| Case 65 | 9  | 6,695,472   | 9,077,607   | 3 | 0 | 3 | 1 |
| Case 65 | 9  | 9,079,771   | 9,863,227   | 0 | 0 | 0 | 0 |
| Case 65 | 9  | 9,863,613   | 10,546,814  | 3 | 0 | 3 | 1 |
| Case 65 | 9  | 10,547,481  | 11,114,781  | 2 | 0 | 2 | 1 |
| Case 65 | 9  | 11,116,389  | 17,564,267  | 3 | 0 | 3 | 1 |
| Case 65 | 9  | 17,572,069  | 21,604,969  | 4 | 0 | 4 | 1 |
| Case 65 | 9  | 21,606,566  | 21,626,573  | 5 | 0 | 5 | 1 |
| Case 65 | 9  | 21,626,953  | 25,049,865  | 0 | 0 | 0 | 0 |
| Case 65 | 9  | 25,068,476  | 28,805,269  | 3 | 0 | 3 | 1 |
| Case 65 | 9  | 28,806,129  | 29,584,528  | 2 | 0 | 2 | 1 |
| Case 65 | 9  | 29,586,738  | 46,944,322  | 3 | 0 | 3 | 1 |
| Case 65 | 9  | 65,629,772  | 71,193,615  | 3 | 0 | 3 | 1 |
| Case 65 | 9  | 71,196,376  | 81,634,304  | 4 | 0 | 4 | 1 |
| Case 65 | 9  | 81,635,735  | 81,648,357  | 2 | 2 | 4 | 0 |
| Case 65 | 9  | 81,651,602  | 103,835,968 | 3 | 0 | 3 | 1 |
| Case 65 | 9  | 103,839,683 | 104,335,682 | 4 | 0 | 4 | 1 |
| Case 65 | 9  | 104,335,754 | 141,066,491 | 3 | 0 | 3 | 1 |
| Case 65 | 10 | 98,087      | 39,097,912  | 2 | 1 | 3 | 0 |
| Case 65 | 10 | 42,436,301  | 135,477,883 | 2 | 1 | 3 | 0 |
| Case 65 | 11 | 193,146     | 236,306     | 3 | 0 | 3 | 1 |
| Case 65 | 11 | 237,087     | 308,180     | 2 | 0 | 2 | 1 |
| Case 65 | 11 | 308,232     | 692,221     | 3 | 0 | 3 | 1 |



|         |    |             |             |   |   |   |   |
|---------|----|-------------|-------------|---|---|---|---|
| Case 65 | 11 | 694,881     | 838,672     | 2 | 0 | 2 | 1 |
| Case 65 | 11 | 838,722     | 1,309,956   | 3 | 0 | 3 | 1 |
| Case 65 | 11 | 1,309,985   | 1,861,761   | 2 | 0 | 2 | 1 |
| Case 65 | 11 | 1,861,852   | 3,688,615   | 3 | 0 | 3 | 1 |
| Case 65 | 11 | 3,688,617   | 4,592,718   | 2 | 0 | 2 | 1 |
| Case 65 | 11 | 4,592,752   | 5,878,617   | 3 | 0 | 3 | 1 |
| Case 65 | 11 | 5,878,628   | 5,934,737   | 5 | 0 | 5 | 1 |
| Case 65 | 11 | 5,954,809   | 5,954,809   | 0 | 0 | 0 | 0 |
| Case 65 | 11 | 5,959,757   | 8,280,938   | 3 | 0 | 3 | 1 |
| Case 65 | 11 | 8,282,786   | 8,856,822   | 2 | 0 | 2 | 1 |
| Case 65 | 11 | 8,859,384   | 9,389,542   | 3 | 0 | 3 | 1 |
| Case 65 | 11 | 9,389,875   | 10,368,976  | 2 | 0 | 2 | 1 |
| Case 65 | 11 | 10,370,420  | 13,248,255  | 3 | 0 | 3 | 1 |
| Case 65 | 11 | 13,250,399  | 15,139,288  | 2 | 0 | 2 | 1 |
| Case 65 | 11 | 15,149,784  | 16,062,814  | 3 | 0 | 3 | 1 |
| Case 65 | 11 | 16,071,435  | 17,441,828  | 2 | 0 | 2 | 1 |
| Case 65 | 11 | 17,442,460  | 18,267,005  | 3 | 0 | 3 | 1 |
| Case 65 | 11 | 18,267,021  | 18,645,843  | 2 | 0 | 2 | 1 |
| Case 65 | 11 | 18,649,798  | 20,160,965  | 3 | 0 | 3 | 1 |
| Case 65 | 11 | 20,161,913  | 20,573,959  | 2 | 0 | 2 | 1 |
| Case 65 | 11 | 20,574,079  | 21,207,667  | 3 | 0 | 3 | 1 |
| Case 65 | 11 | 21,208,251  | 22,297,707  | 2 | 0 | 2 | 1 |
| Case 65 | 11 | 22,301,215  | 22,613,389  | 3 | 0 | 3 | 1 |
| Case 65 | 11 | 22,613,488  | 33,402,402  | 2 | 0 | 2 | 1 |
| Case 65 | 11 | 33,406,776  | 35,874,466  | 3 | 0 | 3 | 1 |
| Case 65 | 11 | 35,875,537  | 44,032,746  | 2 | 0 | 2 | 1 |
| Case 65 | 11 | 44,032,955  | 44,958,869  | 3 | 0 | 3 | 1 |
| Case 65 | 11 | 44,958,891  | 45,093,614  | 2 | 0 | 2 | 1 |
| Case 65 | 11 | 45,098,100  | 45,756,960  | 3 | 0 | 3 | 1 |
| Case 65 | 11 | 45,757,401  | 46,646,030  | 2 | 0 | 2 | 1 |
| Case 65 | 11 | 46,648,461  | 48,457,439  | 3 | 0 | 3 | 1 |
| Case 65 | 11 | 48,476,690  | 51,391,183  | 2 | 0 | 2 | 1 |
| Case 65 | 11 | 51,391,587  | 51,591,253  | 2 | 1 | 3 | 0 |
| Case 65 | 11 | 54,794,237  | 134,934,063 | 2 | 1 | 3 | 0 |
| Case 65 | 12 | 191,619     | 34,853,011  | 3 | 0 | 3 | 1 |
| Case 65 | 12 | 37,876,400  | 49,392,880  | 3 | 0 | 3 | 1 |
| Case 65 | 12 | 49,396,691  | 49,398,862  | 0 | 0 | 0 | 0 |
| Case 65 | 12 | 49,399,132  | 122,676,056 | 3 | 0 | 3 | 1 |
| Case 65 | 12 | 122,676,079 | 122,717,469 | 2 | 0 | 2 | 1 |
| Case 65 | 12 | 122,717,508 | 133,810,935 | 3 | 0 | 3 | 1 |
| Case 65 | 13 | 19,058,717  | 36,464,481  | 2 | 2 | 4 | 0 |
| Case 65 | 13 | 36,467,044  | 115,103,529 | 2 | 1 | 3 | 0 |
| Case 65 | 14 | 19,280,733  | 20,443,751  | 4 | 0 | 4 | 1 |
| Case 65 | 14 | 20,443,757  | 20,445,370  | 2 | 2 | 4 | 0 |
| Case 65 | 14 | 20,445,618  | 22,755,575  | 2 | 1 | 3 | 0 |
| Case 65 | 14 | 22,756,270  | 23,312,931  | 2 | 2 | 4 | 0 |
| Case 65 | 14 | 23,313,596  | 107,287,663 | 2 | 1 | 3 | 0 |
| Case 65 | 15 | 20,034,919  | 29,235,279  | 2 | 2 | 4 | 0 |
| Case 65 | 15 | 29,238,202  | 29,493,154  | 2 | 0 | 2 | 1 |
| Case 65 | 15 | 29,496,888  | 32,441,633  | 2 | 2 | 4 | 0 |
| Case 65 | 15 | 32,443,813  | 32,443,813  | 3 | 0 | 3 | 1 |
| Case 65 | 15 | 32,509,892  | 32,833,659  | 0 | 0 | 0 | 0 |
| Case 65 | 15 | 32,908,419  | 32,908,419  | 3 | 0 | 3 | 1 |
| Case 65 | 15 | 32,917,689  | 102,461,162 | 2 | 2 | 4 | 0 |
| Case 65 | 16 | 88,165      | 3,139,448   | 4 | 0 | 4 | 1 |
| Case 65 | 16 | 3,139,999   | 3,142,291   | 2 | 2 | 4 | 0 |
| Case 65 | 16 | 3,146,285   | 4,163,779   | 3 | 0 | 3 | 1 |
| Case 65 | 16 | 4,164,738   | 4,462,383   | 2 | 0 | 2 | 1 |
| Case 65 | 16 | 4,463,315   | 8,862,990   | 3 | 0 | 3 | 1 |
| Case 65 | 16 | 8,865,819   | 9,290,749   | 4 | 0 | 4 | 1 |
| Case 65 | 16 | 9,295,537   | 9,318,621   | 5 | 0 | 5 | 1 |

|         |    |            |            |   |   |   |   |
|---------|----|------------|------------|---|---|---|---|
| Case 65 | 16 | 9,322,507  | 9,322,507  | 0 | 0 | 0 | 0 |
| Case 65 | 16 | 9,325,087  | 19,083,312 | 3 | 0 | 3 | 1 |
| Case 65 | 16 | 19,083,327 | 19,509,266 | 4 | 0 | 4 | 1 |
| Case 65 | 16 | 19,509,600 | 19,547,959 | 2 | 2 | 4 | 0 |
| Case 65 | 16 | 19,547,970 | 30,392,702 | 3 | 0 | 3 | 1 |
| Case 65 | 16 | 30,392,886 | 31,580,272 | 4 | 0 | 4 | 1 |
| Case 65 | 16 | 31,602,768 | 31,615,193 | 6 | 0 | 6 | 1 |
| Case 65 | 16 | 31,628,382 | 31,664,747 | 5 | 0 | 5 | 1 |
| Case 65 | 16 | 31,676,116 | 31,676,924 | 0 | 0 | 0 | 0 |
| Case 65 | 16 | 31,682,532 | 32,608,438 | 3 | 0 | 3 | 1 |
| Case 65 | 16 | 32,638,258 | 35,285,582 | 2 | 0 | 2 | 1 |
| Case 65 | 16 | 46,450,037 | 47,727,381 | 2 | 0 | 2 | 1 |
| Case 65 | 16 | 47,728,083 | 48,602,733 | 3 | 0 | 3 | 1 |
| Case 65 | 16 | 48,609,395 | 49,302,826 | 2 | 0 | 2 | 1 |
| Case 65 | 16 | 49,303,818 | 50,774,688 | 3 | 0 | 3 | 1 |
| Case 65 | 16 | 50,777,302 | 51,803,936 | 2 | 0 | 2 | 1 |
| Case 65 | 16 | 51,803,986 | 52,657,525 | 3 | 0 | 3 | 1 |
| Case 65 | 16 | 52,659,350 | 53,844,579 | 2 | 0 | 2 | 1 |
| Case 65 | 16 | 53,845,487 | 54,273,278 | 3 | 0 | 3 | 1 |
| Case 65 | 16 | 54,274,020 | 54,747,840 | 2 | 0 | 2 | 1 |
| Case 65 | 16 | 54,751,218 | 55,536,687 | 3 | 0 | 3 | 1 |
| Case 65 | 16 | 55,536,723 | 55,864,452 | 2 | 0 | 2 | 1 |
| Case 65 | 16 | 55,866,915 | 59,144,804 | 3 | 0 | 3 | 1 |
| Case 65 | 16 | 59,171,239 | 65,601,729 | 2 | 0 | 2 | 1 |
| Case 65 | 16 | 65,603,269 | 67,037,064 | 3 | 0 | 3 | 1 |
| Case 65 | 16 | 67,037,445 | 68,156,733 | 2 | 0 | 2 | 1 |
| Case 65 | 16 | 68,156,751 | 69,760,341 | 3 | 0 | 3 | 1 |
| Case 65 | 16 | 69,763,778 | 70,721,883 | 2 | 0 | 2 | 1 |
| Case 65 | 16 | 70,722,940 | 71,264,561 | 3 | 0 | 3 | 1 |
| Case 65 | 16 | 71,272,827 | 72,078,907 | 2 | 0 | 2 | 1 |
| Case 65 | 16 | 72,089,740 | 73,391,671 | 3 | 0 | 3 | 1 |
| Case 65 | 16 | 73,392,951 | 73,523,352 | 2 | 0 | 2 | 1 |
| Case 65 | 16 | 73,524,172 | 73,856,579 | 3 | 0 | 3 | 1 |
| Case 65 | 16 | 73,867,002 | 74,905,986 | 2 | 0 | 2 | 1 |
| Case 65 | 16 | 74,906,114 | 75,574,051 | 3 | 0 | 3 | 1 |
| Case 65 | 16 | 75,574,052 | 77,044,820 | 2 | 0 | 2 | 1 |
| Case 65 | 16 | 77,045,569 | 78,214,775 | 3 | 0 | 3 | 1 |
| Case 65 | 16 | 78,215,909 | 78,420,775 | 2 | 0 | 2 | 1 |
| Case 65 | 16 | 78,420,787 | 78,551,936 | 3 | 0 | 3 | 1 |
| Case 65 | 16 | 78,551,953 | 78,946,211 | 2 | 0 | 2 | 1 |
| Case 65 | 16 | 78,946,587 | 80,099,657 | 3 | 0 | 3 | 1 |
| Case 65 | 16 | 80,108,831 | 80,802,048 | 2 | 0 | 2 | 1 |
| Case 65 | 16 | 80,803,581 | 81,971,582 | 3 | 0 | 3 | 1 |
| Case 65 | 16 | 81,971,677 | 82,495,757 | 2 | 0 | 2 | 1 |
| Case 65 | 16 | 82,498,047 | 82,696,286 | 3 | 0 | 3 | 1 |
| Case 65 | 16 | 82,696,350 | 83,084,131 | 2 | 0 | 2 | 1 |
| Case 65 | 16 | 83,084,723 | 83,785,959 | 3 | 0 | 3 | 1 |
| Case 65 | 16 | 83,787,395 | 84,209,080 | 2 | 0 | 2 | 1 |
| Case 65 | 16 | 84,209,558 | 85,732,708 | 3 | 0 | 3 | 1 |
| Case 65 | 16 | 85,736,429 | 86,409,396 | 2 | 0 | 2 | 1 |
| Case 65 | 16 | 86,409,502 | 90,274,695 | 3 | 0 | 3 | 1 |
| Case 65 | 17 | 11,885     | 6,165,601  | 2 | 2 | 4 | 0 |
| Case 65 | 17 | 6,168,235  | 6,555,534  | 3 | 0 | 3 | 1 |
| Case 65 | 17 | 6,556,326  | 6,943,266  | 2 | 0 | 2 | 1 |
| Case 65 | 17 | 6,943,989  | 8,045,136  | 3 | 0 | 3 | 1 |
| Case 65 | 17 | 8,045,140  | 8,132,763  | 2 | 0 | 2 | 1 |
| Case 65 | 17 | 8,133,261  | 9,517,923  | 3 | 0 | 3 | 1 |
| Case 65 | 17 | 9,525,429  | 9,575,948  | 2 | 2 | 4 | 0 |
| Case 65 | 17 | 9,586,221  | 9,734,626  | 2 | 0 | 2 | 1 |
| Case 65 | 17 | 9,734,656  | 10,274,000 | 3 | 0 | 3 | 1 |
| Case 65 | 17 | 10,276,646 | 10,452,313 | 2 | 0 | 2 | 1 |

|         |    |            |            |   |   |   |   |
|---------|----|------------|------------|---|---|---|---|
| Case 65 | 17 | 10,462,605 | 11,721,344 | 3 | 0 | 3 | 1 |
| Case 65 | 17 | 11,723,088 | 12,332,049 | 2 | 0 | 2 | 1 |
| Case 65 | 17 | 12,336,342 | 12,657,844 | 3 | 0 | 3 | 1 |
| Case 65 | 17 | 12,657,968 | 15,039,528 | 2 | 0 | 2 | 1 |
| Case 65 | 17 | 15,044,804 | 15,058,991 | 0 | 0 | 0 | 0 |
| Case 65 | 17 | 15,060,561 | 15,950,396 | 3 | 0 | 3 | 1 |
| Case 65 | 17 | 15,950,400 | 16,842,991 | 2 | 0 | 2 | 1 |
| Case 65 | 17 | 16,843,084 | 17,572,384 | 3 | 0 | 3 | 1 |
| Case 65 | 17 | 17,580,119 | 17,722,503 | 2 | 0 | 2 | 1 |
| Case 65 | 17 | 17,722,536 | 18,607,786 | 3 | 0 | 3 | 1 |
| Case 65 | 17 | 18,618,644 | 22,242,355 | 2 | 2 | 4 | 0 |
| Case 65 | 17 | 25,268,142 | 34,420,079 | 2 | 2 | 4 | 0 |
| Case 65 | 17 | 34,430,336 | 34,432,735 | 3 | 0 | 3 | 1 |
| Case 65 | 17 | 34,436,532 | 34,436,532 | 5 | 0 | 5 | 1 |
| Case 65 | 17 | 34,436,708 | 34,597,521 | 6 | 0 | 6 | 1 |
| Case 65 | 17 | 34,815,551 | 34,823,170 | 5 | 0 | 5 | 1 |
| Case 65 | 17 | 34,825,482 | 34,825,482 | 0 | 0 | 0 | 0 |
| Case 65 | 17 | 34,831,963 | 34,958,708 | 3 | 0 | 3 | 1 |
| Case 65 | 17 | 34,959,002 | 81,060,040 | 2 | 2 | 4 | 0 |
| Case 65 | 18 | 87,505     | 15,375,878 | 2 | 2 | 4 | 0 |
| Case 65 | 18 | 18,520,354 | 26,162,481 | 2 | 2 | 4 | 0 |
| Case 65 | 18 | 26,162,610 | 29,731,080 | 2 | 0 | 2 | 1 |
| Case 65 | 18 | 29,739,230 | 30,036,543 | 3 | 0 | 3 | 1 |
| Case 65 | 18 | 30,036,758 | 34,255,116 | 2 | 0 | 2 | 1 |
| Case 65 | 18 | 34,255,177 | 35,931,078 | 3 | 0 | 3 | 1 |
| Case 65 | 18 | 35,933,124 | 42,485,500 | 2 | 0 | 2 | 1 |
| Case 65 | 18 | 42,485,524 | 46,523,950 | 3 | 0 | 3 | 1 |
| Case 65 | 18 | 46,526,191 | 47,078,829 | 2 | 0 | 2 | 1 |
| Case 65 | 18 | 47,083,106 | 48,141,359 | 3 | 0 | 3 | 1 |
| Case 65 | 18 | 48,141,498 | 53,046,577 | 1 | 0 | 1 | 0 |
| Case 65 | 18 | 53,048,885 | 53,778,970 | 3 | 0 | 3 | 1 |
| Case 65 | 18 | 53,779,370 | 55,508,418 | 2 | 0 | 2 | 1 |
| Case 65 | 18 | 55,510,452 | 56,667,515 | 3 | 0 | 3 | 1 |
| Case 65 | 18 | 56,668,510 | 57,065,451 | 2 | 0 | 2 | 1 |
| Case 65 | 18 | 57,066,182 | 57,127,057 | 3 | 0 | 3 | 1 |
| Case 65 | 18 | 57,128,335 | 57,658,384 | 2 | 0 | 2 | 1 |
| Case 65 | 18 | 57,659,675 | 60,029,014 | 3 | 0 | 3 | 1 |
| Case 65 | 18 | 60,031,154 | 64,430,701 | 2 | 0 | 2 | 1 |
| Case 65 | 18 | 64,433,748 | 64,941,776 | 3 | 0 | 3 | 1 |
| Case 65 | 18 | 64,942,995 | 67,529,014 | 2 | 0 | 2 | 1 |
| Case 65 | 18 | 67,529,217 | 68,091,496 | 3 | 0 | 3 | 1 |
| Case 65 | 18 | 68,092,510 | 71,546,218 | 2 | 0 | 2 | 1 |
| Case 65 | 18 | 71,551,663 | 71,642,414 | 3 | 0 | 3 | 1 |
| Case 65 | 18 | 71,642,541 | 72,364,088 | 2 | 0 | 2 | 1 |
| Case 65 | 18 | 72,372,586 | 72,385,570 | 0 | 0 | 0 | 0 |
| Case 65 | 18 | 72,393,824 | 74,424,338 | 3 | 0 | 3 | 1 |
| Case 65 | 18 | 74,424,743 | 76,478,016 | 2 | 0 | 2 | 1 |
| Case 65 | 18 | 76,479,152 | 78,015,180 | 2 | 2 | 4 | 0 |
| Case 65 | 19 | 260,912    | 11,828,410 | 2 | 2 | 4 | 0 |
| Case 65 | 19 | 11,832,283 | 12,548,494 | 2 | 1 | 3 | 0 |
| Case 65 | 19 | 12,562,017 | 20,826,692 | 2 | 2 | 4 | 0 |
| Case 65 | 19 | 20,835,290 | 21,992,227 | 2 | 1 | 3 | 0 |
| Case 65 | 19 | 21,992,426 | 23,468,966 | 2 | 2 | 4 | 0 |
| Case 65 | 19 | 23,476,430 | 24,629,285 | 3 | 0 | 3 | 1 |
| Case 65 | 19 | 27,732,159 | 28,399,120 | 3 | 0 | 3 | 1 |
| Case 65 | 19 | 28,404,607 | 41,324,684 | 2 | 2 | 4 | 0 |
| Case 65 | 19 | 41,328,365 | 41,341,589 | 3 | 0 | 3 | 1 |
| Case 65 | 19 | 41,350,895 | 41,379,148 | 0 | 0 | 0 | 0 |
| Case 65 | 19 | 41,382,476 | 41,386,033 | 3 | 0 | 3 | 1 |
| Case 65 | 19 | 41,392,885 | 57,839,291 | 2 | 2 | 4 | 0 |
| Case 65 | 19 | 57,839,407 | 58,453,505 | 2 | 1 | 3 | 0 |

|         |    |             |             |   |   |   |   |
|---------|----|-------------|-------------|---|---|---|---|
| Case 65 | 19 | 58,453,949  | 59,097,160  | 2 | 2 | 4 | 0 |
| Case 65 | 20 | 63,244      | 14,697,386  | 2 | 2 | 4 | 0 |
| Case 65 | 20 | 14,702,391  | 14,705,888  | 3 | 0 | 3 | 1 |
| Case 65 | 20 | 14,713,890  | 15,254,051  | 1 | 0 | 1 | 0 |
| Case 65 | 20 | 15,254,161  | 15,254,161  | 3 | 0 | 3 | 1 |
| Case 65 | 20 | 15,254,475  | 26,293,985  | 2 | 2 | 4 | 0 |
| Case 65 | 20 | 29,425,357  | 40,503,781  | 2 | 2 | 4 | 0 |
| Case 65 | 20 | 40,507,210  | 41,479,082  | 3 | 0 | 3 | 1 |
| Case 65 | 20 | 41,484,685  | 41,987,968  | 2 | 0 | 2 | 1 |
| Case 65 | 20 | 41,993,294  | 44,884,686  | 3 | 0 | 3 | 1 |
| Case 65 | 20 | 44,886,189  | 45,192,989  | 2 | 0 | 2 | 1 |
| Case 65 | 20 | 45,193,325  | 50,966,307  | 3 | 0 | 3 | 1 |
| Case 65 | 20 | 50,979,238  | 62,948,788  | 2 | 2 | 4 | 0 |
| Case 65 | 21 | 10,827,533  | 10,971,337  | 2 | 1 | 3 | 0 |
| Case 65 | 21 | 14,368,320  | 48,100,155  | 2 | 1 | 3 | 0 |
| Case 65 | 22 | 16,114,244  | 30,823,065  | 2 | 1 | 3 | 0 |
| Case 65 | 22 | 30,824,621  | 30,984,027  | 2 | 0 | 2 | 1 |
| Case 65 | 22 | 30,986,172  | 36,329,083  | 2 | 1 | 3 | 0 |
| Case 65 | 22 | 36,337,776  | 36,890,353  | 2 | 0 | 2 | 1 |
| Case 65 | 22 | 36,891,858  | 51,195,728  | 2 | 1 | 3 | 0 |
| Case 66 | 1  | 82,154      | 12,919,081  | 1 | 1 | 2 | 0 |
| Case 66 | 1  | 12,919,838  | 12,920,053  | 7 | 0 | 7 | 1 |
| Case 66 | 1  | 12,921,252  | 80,434,779  | 1 | 1 | 2 | 0 |
| Case 66 | 1  | 80,439,944  | 80,589,739  | 1 | 0 | 1 | 0 |
| Case 66 | 1  | 80,613,801  | 121,346,616 | 1 | 1 | 2 | 0 |
| Case 66 | 1  | 142,649,718 | 249,218,992 | 1 | 1 | 2 | 0 |
| Case 66 | 2  | 18,674      | 58,713,430  | 1 | 1 | 2 | 0 |
| Case 66 | 2  | 58,715,610  | 60,718,043  | 2 | 1 | 3 | 0 |
| Case 66 | 2  | 60,719,074  | 71,789,052  | 1 | 1 | 2 | 0 |
| Case 66 | 2  | 71,789,067  | 72,505,475  | 2 | 1 | 3 | 0 |
| Case 66 | 2  | 72,507,640  | 92,081,640  | 1 | 1 | 2 | 0 |
| Case 66 | 2  | 95,429,424  | 100,753,490 | 1 | 1 | 2 | 0 |
| Case 66 | 2  | 100,756,953 | 101,029,002 | 2 | 1 | 3 | 0 |
| Case 66 | 2  | 101,031,561 | 179,395,926 | 1 | 1 | 2 | 0 |
| Case 66 | 2  | 179,395,958 | 179,642,589 | 2 | 1 | 3 | 0 |
| Case 66 | 2  | 179,642,620 | 235,683,121 | 1 | 1 | 2 | 0 |
| Case 66 | 2  | 235,690,982 | 236,228,570 | 2 | 1 | 3 | 0 |
| Case 66 | 2  | 236,234,442 | 243,048,760 | 1 | 1 | 2 | 0 |
| Case 66 | 3  | 61,495      | 90,442,925  | 1 | 1 | 2 | 0 |
| Case 66 | 3  | 93,537,290  | 197,838,262 | 1 | 1 | 2 | 0 |
| Case 66 | 4  | 71,566      | 49,620,898  | 1 | 1 | 2 | 0 |
| Case 66 | 4  | 52,697,856  | 73,038,187  | 1 | 1 | 2 | 0 |
| Case 66 | 4  | 73,055,314  | 73,506,817  | 2 | 1 | 3 | 0 |
| Case 66 | 4  | 73,508,425  | 190,963,766 | 1 | 1 | 2 | 0 |
| Case 66 | 5  | 38,139      | 730,271     | 1 | 1 | 2 | 0 |
| Case 66 | 5  | 788,646     | 825,338     | 7 | 0 | 7 | 1 |
| Case 66 | 5  | 840,717     | 45,537,299  | 1 | 1 | 2 | 0 |
| Case 66 | 5  | 45,547,278  | 46,399,093  | 1 | 0 | 1 | 0 |
| Case 66 | 5  | 49,457,282  | 49,639,137  | 1 | 0 | 1 | 0 |
| Case 66 | 5  | 49,646,456  | 68,851,541  | 1 | 1 | 2 | 0 |
| Case 66 | 5  | 68,920,307  | 70,308,554  | 7 | 0 | 7 | 1 |
| Case 66 | 5  | 70,704,077  | 83,524,072  | 1 | 1 | 2 | 0 |
| Case 66 | 5  | 83,524,163  | 84,822,809  | 1 | 0 | 1 | 0 |
| Case 66 | 5  | 84,860,966  | 180,693,127 | 1 | 1 | 2 | 0 |
| Case 66 | 6  | 108,666     | 1,443,801   | 1 | 1 | 2 | 0 |
| Case 66 | 6  | 1,445,115   | 1,714,815   | 2 | 1 | 3 | 0 |
| Case 66 | 6  | 1,716,354   | 32,509,357  | 1 | 1 | 2 | 0 |
| Case 66 | 6  | 32,511,672  | 32,629,137  | 2 | 1 | 3 | 0 |
| Case 66 | 6  | 32,629,755  | 39,128,976  | 1 | 1 | 2 | 0 |
| Case 66 | 6  | 39,132,818  | 39,607,534  | 2 | 1 | 3 | 0 |
| Case 66 | 6  | 39,608,028  | 44,445,990  | 1 | 1 | 2 | 0 |

|         |    |             |             |   |   |   |   |
|---------|----|-------------|-------------|---|---|---|---|
| Case 66 | 6  | 44,446,674  | 44,699,068  | 2 | 1 | 3 | 0 |
| Case 66 | 6  | 44,710,304  | 58,752,089  | 1 | 1 | 2 | 0 |
| Case 66 | 6  | 61,891,118  | 166,088,295 | 1 | 1 | 2 | 0 |
| Case 66 | 6  | 166,090,378 | 166,277,064 | 2 | 1 | 3 | 0 |
| Case 66 | 6  | 166,287,778 | 170,980,171 | 1 | 1 | 2 | 0 |
| Case 66 | 7  | 44,935      | 3,434,275   | 1 | 1 | 2 | 0 |
| Case 66 | 7  | 3,445,311   | 3,455,249   | 7 | 0 | 7 | 1 |
| Case 66 | 7  | 3,459,998   | 57,571,771  | 1 | 1 | 2 | 0 |
| Case 66 | 7  | 57,621,951  | 58,019,061  | 1 | 0 | 1 | 0 |
| Case 66 | 7  | 61,056,053  | 65,350,058  | 1 | 0 | 1 | 0 |
| Case 66 | 7  | 65,360,715  | 159,119,486 | 1 | 1 | 2 | 0 |
| Case 66 | 8  | 164,984     | 1,083,364   | 1 | 1 | 2 | 0 |
| Case 66 | 8  | 1,086,161   | 14,759,656  | 2 | 1 | 3 | 0 |
| Case 66 | 8  | 14,762,896  | 16,035,410  | 1 | 1 | 2 | 0 |
| Case 66 | 8  | 16,035,421  | 21,428,969  | 2 | 1 | 3 | 0 |
| Case 66 | 8  | 21,431,520  | 22,168,751  | 1 | 1 | 2 | 0 |
| Case 66 | 8  | 22,169,087  | 22,737,971  | 2 | 1 | 3 | 0 |
| Case 66 | 8  | 22,738,040  | 23,180,616  | 1 | 1 | 2 | 0 |
| Case 66 | 8  | 23,181,742  | 30,126,708  | 2 | 1 | 3 | 0 |
| Case 66 | 8  | 30,128,040  | 31,062,127  | 1 | 1 | 2 | 0 |
| Case 66 | 8  | 31,066,640  | 38,804,226  | 2 | 1 | 3 | 0 |
| Case 66 | 8  | 38,808,657  | 39,645,629  | 1 | 1 | 2 | 0 |
| Case 66 | 8  | 39,645,676  | 41,706,484  | 2 | 1 | 3 | 0 |
| Case 66 | 8  | 41,709,070  | 43,791,691  | 1 | 1 | 2 | 0 |
| Case 66 | 8  | 46,886,735  | 52,687,736  | 1 | 1 | 2 | 0 |
| Case 66 | 8  | 52,693,141  | 56,547,810  | 2 | 1 | 3 | 0 |
| Case 66 | 8  | 56,550,203  | 57,892,699  | 1 | 1 | 2 | 0 |
| Case 66 | 8  | 57,901,469  | 67,330,132  | 2 | 1 | 3 | 0 |
| Case 66 | 8  | 67,334,099  | 68,509,800  | 1 | 1 | 2 | 0 |
| Case 66 | 8  | 68,516,125  | 87,162,446  | 2 | 1 | 3 | 0 |
| Case 66 | 8  | 87,162,510  | 88,937,177  | 1 | 1 | 2 | 0 |
| Case 66 | 8  | 88,956,612  | 95,392,557  | 2 | 1 | 3 | 0 |
| Case 66 | 8  | 95,392,575  | 96,081,402  | 1 | 1 | 2 | 0 |
| Case 66 | 8  | 96,081,568  | 99,817,178  | 2 | 1 | 3 | 0 |
| Case 66 | 8  | 99,824,050  | 101,252,680 | 1 | 1 | 2 | 0 |
| Case 66 | 8  | 101,252,681 | 108,974,658 | 2 | 1 | 3 | 0 |
| Case 66 | 8  | 108,989,834 | 110,528,149 | 1 | 1 | 2 | 0 |
| Case 66 | 8  | 110,530,470 | 140,983,577 | 2 | 1 | 3 | 0 |
| Case 66 | 8  | 140,984,964 | 141,547,226 | 1 | 1 | 2 | 0 |
| Case 66 | 8  | 141,549,291 | 144,134,969 | 2 | 1 | 3 | 0 |
| Case 66 | 8  | 144,135,387 | 146,293,414 | 1 | 1 | 2 | 0 |
| Case 66 | 9  | 46,587      | 17,120,621  | 1 | 1 | 2 | 0 |
| Case 66 | 9  | 17,130,360  | 17,464,622  | 1 | 0 | 1 | 0 |
| Case 66 | 9  | 17,466,468  | 46,944,322  | 1 | 1 | 2 | 0 |
| Case 66 | 9  | 65,629,772  | 135,934,431 | 1 | 1 | 2 | 0 |
| Case 66 | 9  | 135,940,433 | 135,955,672 | 7 | 0 | 7 | 1 |
| Case 66 | 9  | 135,957,091 | 140,006,355 | 1 | 1 | 2 | 0 |
| Case 66 | 9  | 140,006,378 | 140,328,756 | 1 | 0 | 1 | 0 |
| Case 66 | 9  | 140,328,778 | 141,066,491 | 1 | 1 | 2 | 0 |
| Case 66 | 10 | 98,087      | 39,097,912  | 1 | 1 | 2 | 0 |
| Case 66 | 10 | 42,436,301  | 135,477,883 | 1 | 1 | 2 | 0 |
| Case 66 | 11 | 193,146     | 51,591,253  | 1 | 1 | 2 | 0 |
| Case 66 | 11 | 54,794,237  | 108,106,435 | 1 | 1 | 2 | 0 |
| Case 66 | 11 | 108,106,443 | 108,199,832 | 1 | 0 | 1 | 0 |
| Case 66 | 11 | 108,200,946 | 134,934,063 | 1 | 1 | 2 | 0 |
| Case 66 | 12 | 191,619     | 7,993,316   | 1 | 1 | 2 | 0 |
| Case 66 | 12 | 8,000,912   | 8,123,306   | 7 | 0 | 7 | 1 |
| Case 66 | 12 | 8,125,745   | 33,870,297  | 1 | 1 | 2 | 0 |
| Case 66 | 12 | 33,901,640  | 34,853,011  | 1 | 0 | 1 | 0 |
| Case 66 | 12 | 37,876,400  | 38,653,605  | 1 | 0 | 1 | 0 |
| Case 66 | 12 | 38,655,232  | 48,597,064  | 1 | 1 | 2 | 0 |

|         |    |             |             |   |   |   |   |
|---------|----|-------------|-------------|---|---|---|---|
| Case 66 | 12 | 48,597,507  | 49,985,408  | 1 | 0 | 1 | 0 |
| Case 66 | 12 | 49,987,929  | 50,744,581  | 2 | 0 | 2 | 1 |
| Case 66 | 12 | 50,744,680  | 52,642,525  | 1 | 0 | 1 | 0 |
| Case 66 | 12 | 52,645,754  | 53,227,026  | 1 | 1 | 2 | 0 |
| Case 66 | 12 | 53,227,629  | 54,074,686  | 1 | 0 | 1 | 0 |
| Case 66 | 12 | 54,077,750  | 133,343,594 | 1 | 1 | 2 | 0 |
| Case 66 | 12 | 133,345,251 | 133,810,935 | 1 | 0 | 1 | 0 |
| Case 66 | 13 | 19,058,717  | 56,329,717  | 1 | 1 | 2 | 0 |
| Case 66 | 13 | 56,336,439  | 58,556,668  | 2 | 1 | 3 | 0 |
| Case 66 | 13 | 58,586,097  | 59,645,513  | 1 | 1 | 2 | 0 |
| Case 66 | 13 | 59,663,358  | 62,567,545  | 2 | 1 | 3 | 0 |
| Case 66 | 13 | 62,568,064  | 64,574,779  | 1 | 1 | 2 | 0 |
| Case 66 | 13 | 64,578,103  | 82,736,934  | 2 | 1 | 3 | 0 |
| Case 66 | 13 | 82,770,704  | 85,903,717  | 1 | 1 | 2 | 0 |
| Case 66 | 13 | 85,904,426  | 109,464,544 | 2 | 1 | 3 | 0 |
| Case 66 | 13 | 109,464,573 | 109,550,367 | 1 | 1 | 2 | 0 |
| Case 66 | 13 | 109,550,561 | 113,030,748 | 2 | 1 | 3 | 0 |
| Case 66 | 13 | 113,030,773 | 115,103,529 | 1 | 1 | 2 | 0 |
| Case 66 | 14 | 19,280,733  | 20,420,338  | 5 | 0 | 5 | 1 |
| Case 66 | 14 | 20,425,051  | 22,429,647  | 1 | 1 | 2 | 0 |
| Case 66 | 14 | 22,433,866  | 22,970,327  | 2 | 2 | 4 | 0 |
| Case 66 | 14 | 22,972,815  | 107,287,663 | 1 | 1 | 2 | 0 |
| Case 66 | 15 | 20,034,919  | 90,931,363  | 1 | 1 | 2 | 0 |
| Case 66 | 15 | 90,934,008  | 93,903,432  | 2 | 1 | 3 | 0 |
| Case 66 | 15 | 93,904,830  | 93,925,327  | 1 | 1 | 2 | 0 |
| Case 66 | 15 | 93,926,083  | 98,748,160  | 1 | 0 | 1 | 0 |
| Case 66 | 15 | 98,752,036  | 99,696,352  | 1 | 1 | 2 | 0 |
| Case 66 | 15 | 99,696,381  | 100,514,494 | 1 | 0 | 1 | 0 |
| Case 66 | 15 | 100,514,614 | 100,774,192 | 1 | 1 | 2 | 0 |
| Case 66 | 15 | 100,774,546 | 101,555,399 | 1 | 0 | 1 | 0 |
| Case 66 | 15 | 101,555,589 | 102,068,658 | 1 | 1 | 2 | 0 |
| Case 66 | 15 | 102,069,043 | 102,461,162 | 2 | 0 | 2 | 1 |
| Case 66 | 16 | 88,165      | 1,498,367   | 1 | 1 | 2 | 0 |
| Case 66 | 16 | 1,498,408   | 1,545,403   | 1 | 0 | 1 | 0 |
| Case 66 | 16 | 1,545,448   | 28,608,487  | 1 | 1 | 2 | 0 |
| Case 66 | 16 | 28,615,243  | 28,620,752  | 7 | 0 | 7 | 1 |
| Case 66 | 16 | 28,628,143  | 35,285,582  | 1 | 1 | 2 | 0 |
| Case 66 | 16 | 46,450,037  | 90,274,695  | 1 | 1 | 2 | 0 |
| Case 66 | 17 | 11,885      | 22,242,355  | 1 | 1 | 2 | 0 |
| Case 66 | 17 | 25,268,142  | 34,436,708  | 1 | 1 | 2 | 0 |
| Case 66 | 17 | 34,443,811  | 34,476,396  | 5 | 2 | 7 | 0 |
| Case 66 | 17 | 34,597,521  | 79,276,507  | 1 | 1 | 2 | 0 |
| Case 66 | 17 | 79,280,925  | 79,475,871  | 1 | 0 | 1 | 0 |
| Case 66 | 17 | 79,476,101  | 81,060,040  | 1 | 1 | 2 | 0 |
| Case 66 | 18 | 87,505      | 15,375,878  | 1 | 1 | 2 | 0 |
| Case 66 | 18 | 18,520,354  | 78,015,180  | 1 | 1 | 2 | 0 |
| Case 66 | 19 | 260,912     | 611,373     | 1 | 1 | 2 | 0 |
| Case 66 | 19 | 612,234     | 1,057,137   | 1 | 0 | 1 | 0 |
| Case 66 | 19 | 1,057,343   | 9,362,343   | 1 | 1 | 2 | 0 |
| Case 66 | 19 | 9,362,545   | 9,919,713   | 1 | 0 | 1 | 0 |
| Case 66 | 19 | 9,921,575   | 11,598,232  | 1 | 1 | 2 | 0 |
| Case 66 | 19 | 11,598,381  | 12,776,183  | 1 | 0 | 1 | 0 |
| Case 66 | 19 | 12,776,338  | 19,772,856  | 1 | 1 | 2 | 0 |
| Case 66 | 19 | 19,776,814  | 24,629,285  | 1 | 0 | 1 | 0 |
| Case 66 | 19 | 27,732,159  | 28,332,369  | 1 | 0 | 1 | 0 |
| Case 66 | 19 | 28,351,234  | 34,791,496  | 1 | 1 | 2 | 0 |
| Case 66 | 19 | 34,791,556  | 37,028,543  | 2 | 0 | 2 | 1 |
| Case 66 | 19 | 37,034,582  | 38,167,971  | 1 | 0 | 1 | 0 |
| Case 66 | 19 | 38,168,913  | 52,520,595  | 2 | 0 | 2 | 1 |
| Case 66 | 19 | 52,520,607  | 53,757,505  | 1 | 0 | 1 | 0 |
| Case 66 | 19 | 53,757,946  | 58,805,725  | 2 | 0 | 2 | 1 |

|         |    |             |             |   |   |   |   |
|---------|----|-------------|-------------|---|---|---|---|
| Case 66 | 19 | 58,805,742  | 59,097,160  | 1 | 0 | 1 | 0 |
| Case 66 | 20 | 63,244      | 1,419,846   | 1 | 1 | 2 | 0 |
| Case 66 | 20 | 1,420,336   | 1,701,668   | 2 | 1 | 3 | 0 |
| Case 66 | 20 | 1,704,114   | 6,860,895   | 1 | 1 | 2 | 0 |
| Case 66 | 20 | 6,866,917   | 10,731,133  | 2 | 1 | 3 | 0 |
| Case 66 | 20 | 10,732,514  | 12,359,879  | 1 | 1 | 2 | 0 |
| Case 66 | 20 | 12,364,545  | 13,273,069  | 2 | 1 | 3 | 0 |
| Case 66 | 20 | 13,276,381  | 15,087,285  | 1 | 1 | 2 | 0 |
| Case 66 | 20 | 15,087,330  | 15,783,291  | 2 | 1 | 3 | 0 |
| Case 66 | 20 | 15,787,999  | 19,215,642  | 1 | 1 | 2 | 0 |
| Case 66 | 20 | 19,216,527  | 19,780,974  | 2 | 1 | 3 | 0 |
| Case 66 | 20 | 19,788,016  | 26,293,985  | 1 | 1 | 2 | 0 |
| Case 66 | 20 | 29,425,357  | 31,282,965  | 1 | 1 | 2 | 0 |
| Case 66 | 20 | 31,289,294  | 31,973,572  | 2 | 1 | 3 | 0 |
| Case 66 | 20 | 31,974,395  | 62,948,788  | 1 | 1 | 2 | 0 |
| Case 66 | 21 | 10,827,533  | 10,971,337  | 1 | 1 | 2 | 0 |
| Case 66 | 21 | 14,368,320  | 48,100,155  | 1 | 1 | 2 | 0 |
| Case 66 | 22 | 16,114,244  | 51,195,728  | 1 | 1 | 2 | 0 |
| Case 67 | 1  | 82,154      | 17,249,173  | 1 | 1 | 2 | 0 |
| Case 67 | 1  | 17,249,200  | 17,273,287  | 0 | 0 | 0 | 0 |
| Case 67 | 1  | 17,273,371  | 81,227,145  | 1 | 1 | 2 | 0 |
| Case 67 | 1  | 81,228,366  | 81,294,721  | 0 | 0 | 0 | 0 |
| Case 67 | 1  | 81,300,553  | 121,346,616 | 1 | 1 | 2 | 0 |
| Case 67 | 1  | 142,649,718 | 148,937,908 | 1 | 1 | 2 | 0 |
| Case 67 | 1  | 149,039,031 | 149,201,987 | 0 | 0 | 0 | 0 |
| Case 67 | 1  | 149,660,940 | 190,988,857 | 1 | 1 | 2 | 0 |
| Case 67 | 1  | 190,989,756 | 191,199,033 | 1 | 0 | 1 | 0 |
| Case 67 | 1  | 191,223,734 | 243,940,076 | 1 | 1 | 2 | 0 |
| Case 67 | 1  | 243,943,084 | 248,019,808 | 2 | 1 | 3 | 0 |
| Case 67 | 1  | 248,020,448 | 248,059,603 | 1 | 1 | 2 | 0 |
| Case 67 | 1  | 248,059,712 | 249,218,992 | 2 | 1 | 3 | 0 |
| Case 67 | 2  | 18,674      | 11,300,771  | 2 | 0 | 2 | 1 |
| Case 67 | 2  | 11,300,792  | 92,081,640  | 1 | 1 | 2 | 0 |
| Case 67 | 2  | 95,429,424  | 113,451,498 | 1 | 1 | 2 | 0 |
| Case 67 | 2  | 113,457,049 | 113,476,596 | 0 | 0 | 0 | 0 |
| Case 67 | 2  | 113,478,830 | 243,048,760 | 1 | 1 | 2 | 0 |
| Case 67 | 3  | 61,495      | 7,228,869   | 1 | 0 | 1 | 0 |
| Case 67 | 3  | 7,229,067   | 10,887,967  | 2 | 1 | 3 | 0 |
| Case 67 | 3  | 10,888,402  | 56,441,795  | 1 | 1 | 2 | 0 |
| Case 67 | 3  | 56,450,723  | 60,981,024  | 1 | 0 | 1 | 0 |
| Case 67 | 3  | 60,983,267  | 61,166,821  | 0 | 0 | 0 | 0 |
| Case 67 | 3  | 61,168,215  | 61,184,321  | 1 | 1 | 2 | 0 |
| Case 67 | 3  | 61,189,520  | 63,624,266  | 1 | 0 | 1 | 0 |
| Case 67 | 3  | 63,628,019  | 63,640,601  | 3 | 0 | 3 | 1 |
| Case 67 | 3  | 63,643,367  | 63,927,739  | 4 | 0 | 4 | 1 |
| Case 67 | 3  | 63,939,057  | 63,986,170  | 3 | 0 | 3 | 1 |
| Case 67 | 3  | 63,989,456  | 65,512,134  | 3 | 1 | 4 | 0 |
| Case 67 | 3  | 65,514,229  | 65,905,920  | 4 | 1 | 5 | 0 |
| Case 67 | 3  | 65,908,894  | 67,299,754  | 3 | 1 | 4 | 0 |
| Case 67 | 3  | 67,300,242  | 68,332,557  | 4 | 1 | 5 | 0 |
| Case 67 | 3  | 68,334,875  | 70,143,459  | 3 | 1 | 4 | 0 |
| Case 67 | 3  | 70,149,696  | 70,918,127  | 4 | 1 | 5 | 0 |
| Case 67 | 3  | 70,918,294  | 73,022,475  | 3 | 1 | 4 | 0 |
| Case 67 | 3  | 73,023,621  | 73,156,334  | 2 | 1 | 3 | 0 |
| Case 67 | 3  | 73,157,190  | 73,287,838  | 3 | 1 | 4 | 0 |
| Case 67 | 3  | 73,291,914  | 73,594,445  | 1 | 1 | 2 | 0 |
| Case 67 | 3  | 73,601,210  | 73,788,184  | 2 | 1 | 3 | 0 |
| Case 67 | 3  | 73,788,701  | 73,987,905  | 3 | 1 | 4 | 0 |
| Case 67 | 3  | 73,988,264  | 74,193,460  | 2 | 1 | 3 | 0 |
| Case 67 | 3  | 74,194,608  | 74,629,235  | 3 | 1 | 4 | 0 |
| Case 67 | 3  | 74,632,701  | 75,277,620  | 2 | 1 | 3 | 0 |

|         |   |             |             |   |   |   |   |
|---------|---|-------------|-------------|---|---|---|---|
| Case 67 | 3 | 75,279,989  | 75,707,235  | 3 | 1 | 4 | 0 |
| Case 67 | 3 | 75,726,925  | 90,442,925  | 1 | 1 | 2 | 0 |
| Case 67 | 3 | 93,537,290  | 156,626,091 | 1 | 1 | 2 | 0 |
| Case 67 | 3 | 156,642,634 | 195,262,272 | 2 | 1 | 3 | 0 |
| Case 67 | 3 | 195,262,521 | 195,515,508 | 1 | 1 | 2 | 0 |
| Case 67 | 3 | 195,515,510 | 197,403,806 | 2 | 1 | 3 | 0 |
| Case 67 | 3 | 197,403,844 | 197,579,466 | 1 | 1 | 2 | 0 |
| Case 67 | 3 | 197,581,147 | 197,838,262 | 2 | 1 | 3 | 0 |
| Case 67 | 4 | 71,566      | 221,623     | 1 | 1 | 2 | 0 |
| Case 67 | 4 | 225,449     | 442,021     | 1 | 0 | 1 | 0 |
| Case 67 | 4 | 445,794     | 49,620,898  | 1 | 1 | 2 | 0 |
| Case 67 | 4 | 52,697,856  | 190,963,766 | 1 | 1 | 2 | 0 |
| Case 67 | 5 | 38,139      | 46,399,093  | 1 | 1 | 2 | 0 |
| Case 67 | 5 | 49,457,282  | 139,931,644 | 1 | 1 | 2 | 0 |
| Case 67 | 5 | 139,931,646 | 139,931,739 | 2 | 1 | 3 | 0 |
| Case 67 | 5 | 139,931,740 | 180,693,127 | 1 | 1 | 2 | 0 |
| Case 67 | 6 | 108,666     | 2,765,899   | 1 | 0 | 1 | 0 |
| Case 67 | 6 | 2,766,560   | 2,798,619   | 2 | 0 | 2 | 1 |
| Case 67 | 6 | 2,799,060   | 11,550,364  | 1 | 0 | 1 | 0 |
| Case 67 | 6 | 11,551,050  | 58,752,089  | 1 | 1 | 2 | 0 |
| Case 67 | 6 | 61,891,118  | 95,913,318  | 1 | 1 | 2 | 0 |
| Case 67 | 6 | 95,936,540  | 109,762,236 | 1 | 0 | 1 | 0 |
| Case 67 | 6 | 109,762,332 | 109,769,085 | 1 | 1 | 2 | 0 |
| Case 67 | 6 | 109,769,091 | 112,041,081 | 1 | 0 | 1 | 0 |
| Case 67 | 6 | 112,041,087 | 112,383,780 | 1 | 1 | 2 | 0 |
| Case 67 | 6 | 112,389,407 | 126,708,470 | 1 | 0 | 1 | 0 |
| Case 67 | 6 | 126,744,087 | 170,980,171 | 1 | 1 | 2 | 0 |
| Case 67 | 7 | 44,935      | 5,050,816   | 2 | 1 | 3 | 0 |
| Case 67 | 7 | 5,052,357   | 5,645,022   | 1 | 1 | 2 | 0 |
| Case 67 | 7 | 5,647,078   | 8,910,032   | 2 | 1 | 3 | 0 |
| Case 67 | 7 | 8,919,987   | 8,968,569   | 0 | 0 | 0 | 0 |
| Case 67 | 7 | 8,972,810   | 8,973,252   | 1 | 1 | 2 | 0 |
| Case 67 | 7 | 8,974,051   | 29,884,697  | 2 | 1 | 3 | 0 |
| Case 67 | 7 | 29,885,518  | 58,019,061  | 1 | 1 | 2 | 0 |
| Case 67 | 7 | 61,056,053  | 62,035,570  | 1 | 1 | 2 | 0 |
| Case 67 | 7 | 62,043,624  | 62,397,642  | 1 | 0 | 1 | 0 |
| Case 67 | 7 | 62,413,547  | 71,280,299  | 1 | 1 | 2 | 0 |
| Case 67 | 7 | 71,297,516  | 73,226,807  | 2 | 1 | 3 | 0 |
| Case 67 | 7 | 73,239,500  | 91,574,110  | 1 | 1 | 2 | 0 |
| Case 67 | 7 | 91,575,417  | 92,826,850  | 2 | 1 | 3 | 0 |
| Case 67 | 7 | 92,836,316  | 94,364,780  | 1 | 1 | 2 | 0 |
| Case 67 | 7 | 94,368,896  | 94,733,635  | 2 | 1 | 3 | 0 |
| Case 67 | 7 | 94,740,381  | 94,948,626  | 3 | 1 | 4 | 0 |
| Case 67 | 7 | 94,948,784  | 94,999,110  | 2 | 1 | 3 | 0 |
| Case 67 | 7 | 94,999,221  | 95,080,342  | 3 | 1 | 4 | 0 |
| Case 67 | 7 | 95,081,804  | 95,238,643  | 2 | 1 | 3 | 0 |
| Case 67 | 7 | 95,241,819  | 95,687,885  | 3 | 1 | 4 | 0 |
| Case 67 | 7 | 95,697,118  | 95,835,862  | 2 | 1 | 3 | 0 |
| Case 67 | 7 | 95,838,164  | 96,173,019  | 3 | 1 | 4 | 0 |
| Case 67 | 7 | 96,188,993  | 98,054,504  | 2 | 1 | 3 | 0 |
| Case 67 | 7 | 98,062,642  | 98,230,657  | 3 | 1 | 4 | 0 |
| Case 67 | 7 | 98,233,514  | 103,292,487 | 2 | 1 | 3 | 0 |
| Case 67 | 7 | 103,294,611 | 104,142,500 | 3 | 1 | 4 | 0 |
| Case 67 | 7 | 104,143,381 | 104,245,132 | 2 | 1 | 3 | 0 |
| Case 67 | 7 | 104,251,618 | 104,413,768 | 3 | 1 | 4 | 0 |
| Case 67 | 7 | 104,414,719 | 105,266,807 | 2 | 1 | 3 | 0 |
| Case 67 | 7 | 105,273,458 | 106,454,351 | 3 | 1 | 4 | 0 |
| Case 67 | 7 | 106,459,917 | 107,050,221 | 2 | 1 | 3 | 0 |
| Case 67 | 7 | 107,053,030 | 107,258,907 | 3 | 1 | 4 | 0 |
| Case 67 | 7 | 107,258,910 | 107,432,300 | 2 | 1 | 3 | 0 |
| Case 67 | 7 | 107,432,325 | 107,575,162 | 3 | 1 | 4 | 0 |



|         |   |             |             |   |   |   |   |
|---------|---|-------------|-------------|---|---|---|---|
| Case 67 | 7 | 107,575,859 | 107,898,586 | 2 | 1 | 3 | 0 |
| Case 67 | 7 | 107,911,705 | 108,191,625 | 3 | 1 | 4 | 0 |
| Case 67 | 7 | 108,202,792 | 109,214,139 | 2 | 1 | 3 | 0 |
| Case 67 | 7 | 109,217,197 | 110,047,964 | 3 | 1 | 4 | 0 |
| Case 67 | 7 | 110,052,275 | 116,489,938 | 2 | 1 | 3 | 0 |
| Case 67 | 7 | 116,491,214 | 121,999,971 | 1 | 0 | 1 | 0 |
| Case 67 | 7 | 122,001,046 | 127,744,787 | 2 | 1 | 3 | 0 |
| Case 67 | 7 | 127,771,601 | 127,975,953 | 1 | 1 | 2 | 0 |
| Case 67 | 7 | 127,975,964 | 130,065,429 | 2 | 1 | 3 | 0 |
| Case 67 | 7 | 130,079,834 | 133,243,248 | 1 | 0 | 1 | 0 |
| Case 67 | 7 | 133,261,817 | 134,355,857 | 3 | 0 | 3 | 1 |
| Case 67 | 7 | 134,362,448 | 135,483,229 | 3 | 1 | 4 | 0 |
| Case 67 | 7 | 135,483,806 | 135,852,872 | 3 | 0 | 3 | 1 |
| Case 67 | 7 | 135,854,002 | 137,562,504 | 3 | 1 | 4 | 0 |
| Case 67 | 7 | 137,562,607 | 137,562,607 | 1 | 0 | 1 | 0 |
| Case 67 | 7 | 137,562,798 | 137,753,675 | 3 | 0 | 3 | 1 |
| Case 67 | 7 | 137,755,143 | 138,309,274 | 4 | 0 | 4 | 1 |
| Case 67 | 7 | 138,312,122 | 138,816,931 | 3 | 0 | 3 | 1 |
| Case 67 | 7 | 138,817,240 | 139,143,798 | 4 | 0 | 4 | 1 |
| Case 67 | 7 | 139,151,335 | 139,596,859 | 3 | 0 | 3 | 1 |
| Case 67 | 7 | 139,596,953 | 141,255,295 | 3 | 1 | 4 | 0 |
| Case 67 | 7 | 141,272,716 | 141,351,366 | 1 | 1 | 2 | 0 |
| Case 67 | 7 | 141,352,865 | 141,735,114 | 1 | 0 | 1 | 0 |
| Case 67 | 7 | 141,735,912 | 141,968,747 | 2 | 0 | 2 | 1 |
| Case 67 | 7 | 141,968,974 | 142,044,060 | 1 | 0 | 1 | 0 |
| Case 67 | 7 | 142,099,013 | 142,488,688 | 2 | 0 | 2 | 1 |
| Case 67 | 7 | 142,492,130 | 153,353,369 | 1 | 0 | 1 | 0 |
| Case 67 | 7 | 153,356,432 | 158,498,994 | 2 | 0 | 2 | 1 |
| Case 67 | 7 | 158,500,805 | 159,119,486 | 2 | 1 | 3 | 0 |
| Case 67 | 8 | 164,984     | 202,842     | 1 | 0 | 1 | 0 |
| Case 67 | 8 | 209,152     | 3,199,421   | 1 | 1 | 2 | 0 |
| Case 67 | 8 | 3,200,119   | 3,267,743   | 1 | 0 | 1 | 0 |
| Case 67 | 8 | 3,272,206   | 3,351,240   | 1 | 1 | 2 | 0 |
| Case 67 | 8 | 3,353,059   | 3,421,598   | 1 | 0 | 1 | 0 |
| Case 67 | 8 | 3,422,332   | 3,565,900   | 1 | 1 | 2 | 0 |
| Case 67 | 8 | 3,566,615   | 3,620,935   | 1 | 0 | 1 | 0 |
| Case 67 | 8 | 3,621,844   | 3,919,130   | 1 | 1 | 2 | 0 |
| Case 67 | 8 | 3,920,312   | 4,045,835   | 1 | 0 | 1 | 0 |
| Case 67 | 8 | 4,047,054   | 4,433,995   | 1 | 1 | 2 | 0 |
| Case 67 | 8 | 4,434,168   | 4,491,502   | 1 | 0 | 1 | 0 |
| Case 67 | 8 | 4,492,509   | 4,555,958   | 1 | 1 | 2 | 0 |
| Case 67 | 8 | 4,556,148   | 4,619,604   | 1 | 0 | 1 | 0 |
| Case 67 | 8 | 4,622,661   | 6,982,980   | 1 | 1 | 2 | 0 |
| Case 67 | 8 | 7,007,415   | 8,176,221   | 1 | 0 | 1 | 0 |
| Case 67 | 8 | 8,176,283   | 10,467,335  | 1 | 1 | 2 | 0 |
| Case 67 | 8 | 10,467,460  | 10,474,055  | 1 | 0 | 1 | 0 |
| Case 67 | 8 | 10,480,101  | 13,739,069  | 1 | 1 | 2 | 0 |
| Case 67 | 8 | 13,741,178  | 13,894,700  | 1 | 0 | 1 | 0 |
| Case 67 | 8 | 13,895,191  | 14,554,261  | 1 | 1 | 2 | 0 |
| Case 67 | 8 | 14,566,827  | 14,870,622  | 1 | 0 | 1 | 0 |
| Case 67 | 8 | 14,873,709  | 15,652,119  | 1 | 1 | 2 | 0 |
| Case 67 | 8 | 15,652,878  | 15,738,015  | 1 | 0 | 1 | 0 |
| Case 67 | 8 | 15,742,366  | 21,978,705  | 1 | 1 | 2 | 0 |
| Case 67 | 8 | 21,981,218  | 21,986,647  | 1 | 0 | 1 | 0 |
| Case 67 | 8 | 21,994,951  | 23,964,645  | 1 | 1 | 2 | 0 |
| Case 67 | 8 | 23,991,643  | 24,170,960  | 1 | 0 | 1 | 0 |
| Case 67 | 8 | 24,170,983  | 27,630,152  | 1 | 1 | 2 | 0 |
| Case 67 | 8 | 27,633,972  | 27,645,493  | 1 | 0 | 1 | 0 |
| Case 67 | 8 | 27,645,704  | 32,184,932  | 1 | 1 | 2 | 0 |
| Case 67 | 8 | 32,185,759  | 32,499,740  | 1 | 0 | 1 | 0 |
| Case 67 | 8 | 32,501,987  | 43,791,691  | 1 | 1 | 2 | 0 |

|         |    |             |             |   |   |   |   |
|---------|----|-------------|-------------|---|---|---|---|
| Case 67 | 8  | 46,886,735  | 62,636,679  | 1 | 1 | 2 | 0 |
| Case 67 | 8  | 62,641,324  | 62,738,734  | 2 | 1 | 3 | 0 |
| Case 67 | 8  | 62,744,087  | 115,626,102 | 1 | 1 | 2 | 0 |
| Case 67 | 8  | 115,641,238 | 115,642,408 | 0 | 0 | 0 | 0 |
| Case 67 | 8  | 115,650,409 | 120,076,702 | 1 | 1 | 2 | 0 |
| Case 67 | 8  | 120,079,618 | 120,187,354 | 2 | 1 | 3 | 0 |
| Case 67 | 8  | 120,187,709 | 124,663,818 | 1 | 1 | 2 | 0 |
| Case 67 | 8  | 124,663,835 | 125,359,272 | 2 | 1 | 3 | 0 |
| Case 67 | 8  | 125,361,409 | 146,293,414 | 1 | 1 | 2 | 0 |
| Case 67 | 9  | 46,587      | 707,463     | 1 | 0 | 1 | 0 |
| Case 67 | 9  | 710,818     | 712,754     | 1 | 1 | 2 | 0 |
| Case 67 | 9  | 712,757     | 18,810,029  | 1 | 0 | 1 | 0 |
| Case 67 | 9  | 18,811,047  | 18,884,432  | 3 | 0 | 3 | 1 |
| Case 67 | 9  | 18,885,598  | 19,797,850  | 3 | 1 | 4 | 0 |
| Case 67 | 9  | 19,801,918  | 20,676,454  | 4 | 1 | 5 | 0 |
| Case 67 | 9  | 20,690,387  | 20,690,387  | 3 | 1 | 4 | 0 |
| Case 67 | 9  | 20,700,838  | 20,923,667  | 2 | 1 | 3 | 0 |
| Case 67 | 9  | 20,923,696  | 21,226,832  | 3 | 1 | 4 | 0 |
| Case 67 | 9  | 21,227,670  | 23,184,533  | 2 | 1 | 3 | 0 |
| Case 67 | 9  | 23,186,453  | 23,427,158  | 3 | 1 | 4 | 0 |
| Case 67 | 9  | 23,430,020  | 24,231,246  | 2 | 1 | 3 | 0 |
| Case 67 | 9  | 24,233,393  | 35,042,876  | 1 | 0 | 1 | 0 |
| Case 67 | 9  | 35,042,892  | 35,100,002  | 2 | 0 | 2 | 1 |
| Case 67 | 9  | 35,100,468  | 38,773,251  | 1 | 0 | 1 | 0 |
| Case 67 | 9  | 39,004,140  | 46,944,322  | 1 | 1 | 2 | 0 |
| Case 67 | 9  | 65,629,772  | 69,410,435  | 1 | 1 | 2 | 0 |
| Case 67 | 9  | 70,984,372  | 85,282,258  | 2 | 1 | 3 | 0 |
| Case 67 | 9  | 85,288,781  | 88,671,087  | 3 | 1 | 4 | 0 |
| Case 67 | 9  | 88,679,834  | 89,356,423  | 4 | 1 | 5 | 0 |
| Case 67 | 9  | 89,365,547  | 90,503,219  | 3 | 1 | 4 | 0 |
| Case 67 | 9  | 90,503,310  | 90,503,310  | 1 | 0 | 1 | 0 |
| Case 67 | 9  | 90,503,313  | 90,811,182  | 3 | 0 | 3 | 1 |
| Case 67 | 9  | 90,816,711  | 91,605,963  | 3 | 1 | 4 | 0 |
| Case 67 | 9  | 91,605,981  | 92,725,441  | 3 | 0 | 3 | 1 |
| Case 67 | 9  | 92,727,048  | 93,067,144  | 3 | 1 | 4 | 0 |
| Case 67 | 9  | 93,067,790  | 93,357,338  | 4 | 1 | 5 | 0 |
| Case 67 | 9  | 93,359,512  | 94,266,286  | 3 | 1 | 4 | 0 |
| Case 67 | 9  | 94,267,243  | 94,267,243  | 1 | 0 | 1 | 0 |
| Case 67 | 9  | 94,269,967  | 94,603,970  | 3 | 0 | 3 | 1 |
| Case 67 | 9  | 94,609,451  | 95,580,376  | 3 | 1 | 4 | 0 |
| Case 67 | 9  | 95,586,719  | 100,767,860 | 1 | 0 | 1 | 0 |
| Case 67 | 9  | 100,784,050 | 141,066,491 | 1 | 1 | 2 | 0 |
| Case 67 | 10 | 98,087      | 39,097,912  | 1 | 1 | 2 | 0 |
| Case 67 | 10 | 42,436,301  | 135,477,883 | 1 | 1 | 2 | 0 |
| Case 67 | 11 | 193,146     | 1,020,722   | 1 | 1 | 2 | 0 |
| Case 67 | 11 | 1,021,245   | 4,601,302   | 1 | 0 | 1 | 0 |
| Case 67 | 11 | 4,601,873   | 4,903,891   | 2 | 0 | 2 | 1 |
| Case 67 | 11 | 4,904,034   | 4,931,083   | 1 | 0 | 1 | 0 |
| Case 67 | 11 | 4,932,775   | 4,946,345   | 2 | 0 | 2 | 1 |
| Case 67 | 11 | 4,947,313   | 5,153,158   | 1 | 0 | 1 | 0 |
| Case 67 | 11 | 5,153,175   | 5,173,413   | 2 | 0 | 2 | 1 |
| Case 67 | 11 | 5,173,538   | 5,366,319   | 1 | 0 | 1 | 0 |
| Case 67 | 11 | 5,366,991   | 5,411,239   | 1 | 1 | 2 | 0 |
| Case 67 | 11 | 5,411,371   | 5,457,631   | 1 | 0 | 1 | 0 |
| Case 67 | 11 | 5,461,263   | 5,475,505   | 2 | 0 | 2 | 1 |
| Case 67 | 11 | 5,475,506   | 6,088,712   | 1 | 0 | 1 | 0 |
| Case 67 | 11 | 6,089,740   | 51,591,253  | 1 | 1 | 2 | 0 |
| Case 67 | 11 | 54,794,237  | 55,360,213  | 1 | 1 | 2 | 0 |
| Case 67 | 11 | 55,361,808  | 55,427,700  | 0 | 0 | 0 | 0 |
| Case 67 | 11 | 55,431,897  | 62,297,870  | 1 | 1 | 2 | 0 |
| Case 67 | 11 | 62,298,509  | 66,845,362  | 2 | 0 | 2 | 1 |

|         |    |             |             |   |   |   |   |
|---------|----|-------------|-------------|---|---|---|---|
| Case 67 | 11 | 66,853,465  | 69,239,611  | 3 | 0 | 3 | 1 |
| Case 67 | 11 | 69,239,741  | 70,120,501  | 4 | 0 | 4 | 1 |
| Case 67 | 11 | 70,159,690  | 89,935,586  | 3 | 0 | 3 | 1 |
| Case 67 | 11 | 89,935,908  | 90,677,706  | 2 | 0 | 2 | 1 |
| Case 67 | 11 | 90,716,340  | 97,274,869  | 3 | 0 | 3 | 1 |
| Case 67 | 11 | 97,279,736  | 100,345,438 | 4 | 0 | 4 | 1 |
| Case 67 | 11 | 100,375,968 | 103,820,517 | 7 | 0 | 7 | 1 |
| Case 67 | 11 | 103,833,805 | 108,122,604 | 2 | 0 | 2 | 1 |
| Case 67 | 11 | 108,122,700 | 108,186,631 | 1 | 0 | 1 | 0 |
| Case 67 | 11 | 108,186,638 | 119,580,852 | 2 | 0 | 2 | 1 |
| Case 67 | 11 | 119,582,832 | 120,531,034 | 1 | 0 | 1 | 0 |
| Case 67 | 11 | 120,531,073 | 120,783,369 | 2 | 0 | 2 | 1 |
| Case 67 | 11 | 120,786,892 | 124,180,082 | 1 | 0 | 1 | 0 |
| Case 67 | 11 | 124,180,282 | 124,464,910 | 2 | 0 | 2 | 1 |
| Case 67 | 11 | 124,466,751 | 125,093,850 | 1 | 0 | 1 | 0 |
| Case 67 | 11 | 125,095,221 | 125,349,829 | 2 | 0 | 2 | 1 |
| Case 67 | 11 | 125,351,472 | 128,839,156 | 1 | 0 | 1 | 0 |
| Case 67 | 11 | 128,839,276 | 128,842,940 | 1 | 1 | 2 | 0 |
| Case 67 | 11 | 128,843,573 | 130,699,110 | 1 | 0 | 1 | 0 |
| Case 67 | 11 | 130,699,300 | 130,800,330 | 2 | 0 | 2 | 1 |
| Case 67 | 11 | 130,801,649 | 132,610,286 | 1 | 0 | 1 | 0 |
| Case 67 | 11 | 132,612,241 | 133,505,509 | 0 | 0 | 0 | 0 |
| Case 67 | 11 | 133,507,330 | 133,525,963 | 1 | 1 | 2 | 0 |
| Case 67 | 11 | 133,528,521 | 134,934,063 | 1 | 0 | 1 | 0 |
| Case 67 | 12 | 191,619     | 771,229     | 1 | 1 | 2 | 0 |
| Case 67 | 12 | 772,619     | 772,619     | 2 | 1 | 3 | 0 |
| Case 67 | 12 | 772,649     | 796,131     | 3 | 1 | 4 | 0 |
| Case 67 | 12 | 803,488     | 34,853,011  | 1 | 1 | 2 | 0 |
| Case 67 | 12 | 37,876,400  | 133,810,935 | 1 | 1 | 2 | 0 |
| Case 67 | 13 | 19,058,717  | 56,677,746  | 1 | 1 | 2 | 0 |
| Case 67 | 13 | 56,699,942  | 76,391,366  | 1 | 0 | 1 | 0 |
| Case 67 | 13 | 76,395,278  | 76,429,475  | 2 | 0 | 2 | 1 |
| Case 67 | 13 | 76,430,665  | 82,503,963  | 1 | 0 | 1 | 0 |
| Case 67 | 13 | 82,512,318  | 85,792,109  | 1 | 1 | 2 | 0 |
| Case 67 | 13 | 85,799,430  | 85,804,087  | 0 | 0 | 0 | 0 |
| Case 67 | 13 | 85,812,672  | 115,103,529 | 1 | 1 | 2 | 0 |
| Case 67 | 14 | 19,280,733  | 20,425,051  | 2 | 1 | 3 | 0 |
| Case 67 | 14 | 20,426,742  | 22,536,550  | 1 | 1 | 2 | 0 |
| Case 67 | 14 | 22,538,661  | 22,942,619  | 2 | 1 | 3 | 0 |
| Case 67 | 14 | 22,942,890  | 107,287,663 | 1 | 1 | 2 | 0 |
| Case 67 | 15 | 20,034,919  | 20,212,798  | 1 | 1 | 2 | 0 |
| Case 67 | 15 | 20,612,840  | 22,652,330  | 1 | 0 | 1 | 0 |
| Case 67 | 15 | 22,750,305  | 102,461,162 | 1 | 1 | 2 | 0 |
| Case 67 | 16 | 88,165      | 4,940,782   | 1 | 1 | 2 | 0 |
| Case 67 | 16 | 4,940,825   | 4,942,171   | 1 | 0 | 1 | 0 |
| Case 67 | 16 | 4,943,234   | 5,607,313   | 1 | 1 | 2 | 0 |
| Case 67 | 16 | 5,608,833   | 5,613,997   | 0 | 0 | 0 | 0 |
| Case 67 | 16 | 5,618,728   | 35,285,582  | 1 | 1 | 2 | 0 |
| Case 67 | 16 | 46,450,037  | 77,766,640  | 1 | 1 | 2 | 0 |
| Case 67 | 16 | 77,767,491  | 78,236,048  | 2 | 1 | 3 | 0 |
| Case 67 | 16 | 78,243,384  | 78,487,877  | 1 | 1 | 2 | 0 |
| Case 67 | 16 | 78,487,924  | 78,594,171  | 1 | 0 | 1 | 0 |
| Case 67 | 16 | 78,595,260  | 78,939,658  | 1 | 1 | 2 | 0 |
| Case 67 | 16 | 78,940,747  | 79,091,847  | 1 | 0 | 1 | 0 |
| Case 67 | 16 | 79,092,083  | 90,274,695  | 1 | 1 | 2 | 0 |
| Case 67 | 17 | 11,885      | 5,042,715   | 1 | 1 | 2 | 0 |
| Case 67 | 17 | 5,042,837   | 5,490,702   | 1 | 0 | 1 | 0 |
| Case 67 | 17 | 5,492,436   | 9,445,259   | 1 | 1 | 2 | 0 |
| Case 67 | 17 | 9,448,879   | 9,525,429   | 1 | 0 | 1 | 0 |
| Case 67 | 17 | 9,532,106   | 9,683,268   | 1 | 1 | 2 | 0 |
| Case 67 | 17 | 9,683,276   | 9,735,369   | 1 | 0 | 1 | 0 |

|         |    |            |            |   |   |   |   |
|---------|----|------------|------------|---|---|---|---|
| Case 67 | 17 | 9,737,139  | 9,804,493  | 1 | 1 | 2 | 0 |
| Case 67 | 17 | 9,804,724  | 15,039,528 | 1 | 0 | 1 | 0 |
| Case 67 | 17 | 15,044,804 | 15,058,236 | 0 | 0 | 0 | 0 |
| Case 67 | 17 | 15,058,991 | 15,060,561 | 1 | 1 | 2 | 0 |
| Case 67 | 17 | 15,063,832 | 22,242,355 | 1 | 0 | 1 | 0 |
| Case 67 | 17 | 25,268,142 | 81,060,040 | 1 | 1 | 2 | 0 |
| Case 67 | 18 | 87,505     | 15,375,878 | 1 | 0 | 1 | 0 |
| Case 67 | 18 | 18,520,354 | 18,556,505 | 1 | 0 | 1 | 0 |
| Case 67 | 18 | 18,561,020 | 38,508,040 | 1 | 1 | 2 | 0 |
| Case 67 | 18 | 38,519,691 | 40,345,564 | 1 | 0 | 1 | 0 |
| Case 67 | 18 | 40,357,460 | 41,626,891 | 1 | 1 | 2 | 0 |
| Case 67 | 18 | 41,627,797 | 49,754,754 | 2 | 1 | 3 | 0 |
| Case 67 | 18 | 49,765,016 | 50,400,650 | 1 | 0 | 1 | 0 |
| Case 67 | 18 | 50,410,686 | 50,894,200 | 2 | 1 | 3 | 0 |
| Case 67 | 18 | 50,900,432 | 51,656,039 | 1 | 0 | 1 | 0 |
| Case 67 | 18 | 51,674,135 | 51,978,494 | 2 | 1 | 3 | 0 |
| Case 67 | 18 | 51,997,963 | 53,026,357 | 1 | 0 | 1 | 0 |
| Case 67 | 18 | 53,034,581 | 53,186,092 | 2 | 1 | 3 | 0 |
| Case 67 | 18 | 53,186,847 | 56,181,943 | 1 | 0 | 1 | 0 |
| Case 67 | 18 | 56,184,198 | 56,204,768 | 2 | 0 | 2 | 1 |
| Case 67 | 18 | 56,204,832 | 78,015,180 | 1 | 0 | 1 | 0 |
| Case 67 | 19 | 260,912    | 20,905,979 | 1 | 1 | 2 | 0 |
| Case 67 | 19 | 20,909,349 | 21,607,695 | 1 | 0 | 1 | 0 |
| Case 67 | 19 | 21,613,836 | 24,222,786 | 1 | 1 | 2 | 0 |
| Case 67 | 19 | 24,231,229 | 24,629,285 | 1 | 0 | 1 | 0 |
| Case 67 | 19 | 27,732,159 | 27,862,694 | 1 | 0 | 1 | 0 |
| Case 67 | 19 | 27,919,724 | 41,356,054 | 1 | 1 | 2 | 0 |
| Case 67 | 19 | 41,356,751 | 41,379,148 | 0 | 0 | 0 | 0 |
| Case 67 | 19 | 41,382,476 | 52,529,074 | 1 | 1 | 2 | 0 |
| Case 67 | 19 | 52,535,421 | 52,543,752 | 1 | 0 | 1 | 0 |
| Case 67 | 19 | 52,543,833 | 54,721,009 | 1 | 1 | 2 | 0 |
| Case 67 | 19 | 54,722,230 | 54,760,453 | 2 | 0 | 2 | 1 |
| Case 67 | 19 | 54,761,023 | 59,097,160 | 1 | 1 | 2 | 0 |
| Case 67 | 20 | 63,244     | 26,293,985 | 1 | 1 | 2 | 0 |
| Case 67 | 20 | 29,425,357 | 32,535,305 | 1 | 1 | 2 | 0 |
| Case 67 | 20 | 32,540,501 | 34,806,805 | 2 | 1 | 3 | 0 |
| Case 67 | 20 | 34,806,861 | 35,060,236 | 3 | 1 | 4 | 0 |
| Case 67 | 20 | 35,060,338 | 35,060,338 | 1 | 0 | 1 | 0 |
| Case 67 | 20 | 35,060,424 | 36,641,735 | 3 | 0 | 3 | 1 |
| Case 67 | 20 | 36,650,065 | 36,869,005 | 3 | 1 | 4 | 0 |
| Case 67 | 20 | 36,869,100 | 37,263,408 | 3 | 0 | 3 | 1 |
| Case 67 | 20 | 37,266,205 | 37,266,205 | 2 | 1 | 3 | 0 |
| Case 67 | 20 | 37,266,561 | 37,497,339 | 3 | 1 | 4 | 0 |
| Case 67 | 20 | 37,499,139 | 37,746,454 | 2 | 1 | 3 | 0 |
| Case 67 | 20 | 37,771,578 | 38,261,904 | 3 | 1 | 4 | 0 |
| Case 67 | 20 | 38,262,073 | 38,538,768 | 2 | 1 | 3 | 0 |
| Case 67 | 20 | 38,538,909 | 39,623,283 | 3 | 1 | 4 | 0 |
| Case 67 | 20 | 39,634,488 | 39,991,293 | 2 | 1 | 3 | 0 |
| Case 67 | 20 | 39,991,463 | 40,052,133 | 3 | 1 | 4 | 0 |
| Case 67 | 20 | 40,052,215 | 40,400,021 | 2 | 1 | 3 | 0 |
| Case 67 | 20 | 40,406,526 | 40,586,445 | 3 | 1 | 4 | 0 |
| Case 67 | 20 | 40,587,035 | 40,901,723 | 2 | 1 | 3 | 0 |
| Case 67 | 20 | 40,906,498 | 40,941,198 | 3 | 1 | 4 | 0 |
| Case 67 | 20 | 40,943,696 | 41,023,705 | 2 | 1 | 3 | 0 |
| Case 67 | 20 | 41,025,107 | 41,093,484 | 3 | 1 | 4 | 0 |
| Case 67 | 20 | 41,094,035 | 41,594,361 | 2 | 1 | 3 | 0 |
| Case 67 | 20 | 41,598,995 | 42,083,862 | 3 | 1 | 4 | 0 |
| Case 67 | 20 | 42,085,488 | 42,383,192 | 2 | 1 | 3 | 0 |
| Case 67 | 20 | 42,384,469 | 45,354,190 | 3 | 1 | 4 | 0 |
| Case 67 | 20 | 45,354,276 | 45,354,276 | 1 | 0 | 1 | 0 |
| Case 67 | 20 | 45,354,291 | 45,895,799 | 3 | 0 | 3 | 1 |

|         |    |            |            |   |   |   |   |
|---------|----|------------|------------|---|---|---|---|
| Case 67 | 20 | 45,896,816 | 46,789,507 | 3 | 1 | 4 | 0 |
| Case 67 | 20 | 46,793,542 | 46,793,542 | 1 | 0 | 1 | 0 |
| Case 67 | 20 | 46,793,769 | 48,116,955 | 3 | 0 | 3 | 1 |
| Case 67 | 20 | 48,118,822 | 48,522,585 | 3 | 1 | 4 | 0 |
| Case 67 | 20 | 48,522,625 | 48,522,655 | 1 | 0 | 1 | 0 |
| Case 67 | 20 | 48,522,659 | 50,276,113 | 3 | 0 | 3 | 1 |
| Case 67 | 20 | 50,278,297 | 50,701,128 | 4 | 0 | 4 | 1 |
| Case 67 | 20 | 50,701,293 | 50,981,237 | 3 | 0 | 3 | 1 |
| Case 67 | 20 | 50,988,568 | 51,870,325 | 3 | 1 | 4 | 0 |
| Case 67 | 20 | 51,870,336 | 51,870,336 | 1 | 0 | 1 | 0 |
| Case 67 | 20 | 51,870,539 | 52,232,673 | 3 | 0 | 3 | 1 |
| Case 67 | 20 | 52,240,212 | 54,650,520 | 3 | 1 | 4 | 0 |
| Case 67 | 20 | 54,654,489 | 55,610,644 | 3 | 0 | 3 | 1 |
| Case 67 | 20 | 55,614,851 | 57,561,221 | 3 | 1 | 4 | 0 |
| Case 67 | 20 | 57,562,859 | 57,599,824 | 2 | 1 | 3 | 0 |
| Case 67 | 20 | 57,601,995 | 61,382,667 | 3 | 1 | 4 | 0 |
| Case 67 | 20 | 61,384,043 | 61,384,043 | 1 | 0 | 1 | 0 |
| Case 67 | 20 | 61,385,787 | 61,908,578 | 3 | 0 | 3 | 1 |
| Case 67 | 20 | 61,909,041 | 62,265,130 | 3 | 1 | 4 | 0 |
| Case 67 | 20 | 62,268,955 | 62,268,955 | 1 | 0 | 1 | 0 |
| Case 67 | 20 | 62,269,942 | 62,948,788 | 3 | 0 | 3 | 1 |
| Case 67 | 21 | 10,827,533 | 10,971,337 | 1 | 1 | 2 | 0 |
| Case 67 | 21 | 14,368,320 | 48,100,155 | 1 | 1 | 2 | 0 |
| Case 67 | 22 | 16,114,244 | 51,195,728 | 1 | 1 | 2 | 0 |
| Case 69 | 1  | 82,154     | 768,448    | 4 | 0 | 4 | 1 |
| Case 69 | 1  | 776,546    | 1,114,668  | 3 | 2 | 5 | 0 |
| Case 69 | 1  | 1,115,461  | 1,223,058  | 2 | 2 | 4 | 0 |
| Case 69 | 1  | 1,223,122  | 1,356,550  | 3 | 2 | 5 | 0 |
| Case 69 | 1  | 1,361,463  | 2,733,587  | 3 | 1 | 4 | 0 |
| Case 69 | 1  | 2,739,933  | 3,531,595  | 4 | 1 | 5 | 0 |
| Case 69 | 1  | 3,538,501  | 3,807,482  | 3 | 1 | 4 | 0 |
| Case 69 | 1  | 3,807,507  | 12,806,196 | 4 | 1 | 5 | 0 |
| Case 69 | 1  | 12,806,478 | 12,837,311 | 3 | 1 | 4 | 0 |
| Case 69 | 1  | 12,837,570 | 12,850,542 | 7 | 0 | 7 | 1 |
| Case 69 | 1  | 12,852,872 | 12,871,327 | 1 | 0 | 1 | 0 |
| Case 69 | 1  | 12,880,356 | 12,921,278 | 2 | 1 | 3 | 0 |
| Case 69 | 1  | 12,961,019 | 13,374,687 | 3 | 1 | 4 | 0 |
| Case 69 | 1  | 13,737,240 | 25,573,262 | 4 | 1 | 5 | 0 |
| Case 69 | 1  | 25,573,406 | 25,629,950 | 2 | 1 | 3 | 0 |
| Case 69 | 1  | 25,642,596 | 28,433,304 | 2 | 0 | 2 | 1 |
| Case 69 | 1  | 28,450,288 | 28,696,091 | 2 | 1 | 3 | 0 |
| Case 69 | 1  | 28,740,421 | 30,739,134 | 3 | 1 | 4 | 0 |
| Case 69 | 1  | 30,740,493 | 31,000,821 | 3 | 2 | 5 | 0 |
| Case 69 | 1  | 31,005,713 | 34,683,153 | 3 | 1 | 4 | 0 |
| Case 69 | 1  | 34,684,463 | 35,118,335 | 3 | 2 | 5 | 0 |
| Case 69 | 1  | 35,118,666 | 40,661,311 | 3 | 1 | 4 | 0 |
| Case 69 | 1  | 40,661,363 | 41,634,956 | 4 | 1 | 5 | 0 |
| Case 69 | 1  | 41,650,222 | 47,276,819 | 3 | 1 | 4 | 0 |
| Case 69 | 1  | 47,277,217 | 47,392,596 | 4 | 1 | 5 | 0 |
| Case 69 | 1  | 47,394,096 | 48,705,391 | 3 | 1 | 4 | 0 |
| Case 69 | 1  | 48,708,202 | 49,894,407 | 3 | 2 | 5 | 0 |
| Case 69 | 1  | 49,928,063 | 50,937,848 | 2 | 2 | 4 | 0 |
| Case 69 | 1  | 50,945,526 | 53,832,824 | 2 | 1 | 3 | 0 |
| Case 69 | 1  | 53,837,187 | 54,194,992 | 2 | 2 | 4 | 0 |
| Case 69 | 1  | 54,196,929 | 54,607,157 | 2 | 1 | 3 | 0 |
| Case 69 | 1  | 54,608,352 | 55,012,359 | 2 | 2 | 4 | 0 |
| Case 69 | 1  | 55,012,825 | 55,249,154 | 2 | 1 | 3 | 0 |
| Case 69 | 1  | 55,250,684 | 55,521,109 | 2 | 2 | 4 | 0 |
| Case 69 | 1  | 55,521,701 | 55,748,993 | 2 | 1 | 3 | 0 |
| Case 69 | 1  | 55,749,478 | 57,057,316 | 2 | 2 | 4 | 0 |
| Case 69 | 1  | 57,066,988 | 57,209,853 | 2 | 1 | 3 | 0 |

|         |   |             |             |   |   |   |   |
|---------|---|-------------|-------------|---|---|---|---|
| Case 69 | 1 | 57,209,907  | 58,996,320  | 2 | 2 | 4 | 0 |
| Case 69 | 1 | 58,999,651  | 59,175,142  | 2 | 1 | 3 | 0 |
| Case 69 | 1 | 59,175,979  | 62,228,696  | 2 | 2 | 4 | 0 |
| Case 69 | 1 | 62,228,751  | 62,578,944  | 2 | 1 | 3 | 0 |
| Case 69 | 1 | 62,579,672  | 62,896,419  | 2 | 2 | 4 | 0 |
| Case 69 | 1 | 62,898,142  | 63,361,221  | 2 | 1 | 3 | 0 |
| Case 69 | 1 | 63,362,324  | 63,872,032  | 2 | 2 | 4 | 0 |
| Case 69 | 1 | 63,872,871  | 64,059,403  | 2 | 1 | 3 | 0 |
| Case 69 | 1 | 64,075,768  | 67,209,088  | 2 | 2 | 4 | 0 |
| Case 69 | 1 | 67,209,818  | 67,507,941  | 2 | 1 | 3 | 0 |
| Case 69 | 1 | 67,509,698  | 67,727,555  | 2 | 2 | 4 | 0 |
| Case 69 | 1 | 67,730,628  | 67,787,286  | 2 | 1 | 3 | 0 |
| Case 69 | 1 | 67,787,353  | 69,551,411  | 2 | 2 | 4 | 0 |
| Case 69 | 1 | 69,554,417  | 69,851,618  | 2 | 1 | 3 | 0 |
| Case 69 | 1 | 69,865,203  | 70,505,178  | 2 | 2 | 4 | 0 |
| Case 69 | 1 | 70,517,191  | 70,705,315  | 2 | 1 | 3 | 0 |
| Case 69 | 1 | 70,715,711  | 72,215,994  | 2 | 2 | 4 | 0 |
| Case 69 | 1 | 72,217,553  | 74,756,402  | 2 | 1 | 3 | 0 |
| Case 69 | 1 | 74,762,198  | 76,253,229  | 2 | 2 | 4 | 0 |
| Case 69 | 1 | 76,255,112  | 76,432,008  | 2 | 1 | 3 | 0 |
| Case 69 | 1 | 76,438,011  | 77,552,639  | 2 | 2 | 4 | 0 |
| Case 69 | 1 | 77,553,461  | 77,804,242  | 2 | 1 | 3 | 0 |
| Case 69 | 1 | 77,808,677  | 77,994,269  | 2 | 2 | 4 | 0 |
| Case 69 | 1 | 78,001,652  | 78,666,990  | 2 | 1 | 3 | 0 |
| Case 69 | 1 | 78,691,660  | 79,264,728  | 2 | 2 | 4 | 0 |
| Case 69 | 1 | 79,272,660  | 81,208,897  | 2 | 1 | 3 | 0 |
| Case 69 | 1 | 81,209,339  | 82,246,289  | 2 | 2 | 4 | 0 |
| Case 69 | 1 | 82,246,392  | 82,436,281  | 2 | 1 | 3 | 0 |
| Case 69 | 1 | 82,437,536  | 84,304,441  | 2 | 2 | 4 | 0 |
| Case 69 | 1 | 84,304,638  | 84,835,699  | 2 | 1 | 3 | 0 |
| Case 69 | 1 | 84,840,651  | 84,953,415  | 2 | 2 | 4 | 0 |
| Case 69 | 1 | 84,955,233  | 85,201,228  | 2 | 1 | 3 | 0 |
| Case 69 | 1 | 85,203,780  | 85,589,842  | 2 | 2 | 4 | 0 |
| Case 69 | 1 | 85,589,914  | 85,680,408  | 2 | 1 | 3 | 0 |
| Case 69 | 1 | 85,681,267  | 86,117,583  | 2 | 2 | 4 | 0 |
| Case 69 | 1 | 86,118,447  | 86,951,806  | 2 | 1 | 3 | 0 |
| Case 69 | 1 | 86,952,219  | 87,025,994  | 2 | 2 | 4 | 0 |
| Case 69 | 1 | 87,026,002  | 87,611,710  | 2 | 1 | 3 | 0 |
| Case 69 | 1 | 87,613,358  | 119,146,085 | 2 | 2 | 4 | 0 |
| Case 69 | 1 | 119,149,428 | 119,441,722 | 3 | 2 | 5 | 0 |
| Case 69 | 1 | 119,443,768 | 121,346,616 | 3 | 1 | 4 | 0 |
| Case 69 | 1 | 142,649,718 | 145,395,440 | 3 | 1 | 4 | 0 |
| Case 69 | 1 | 145,395,604 | 152,255,225 | 4 | 1 | 5 | 0 |
| Case 69 | 1 | 152,259,078 | 152,275,790 | 3 | 1 | 4 | 0 |
| Case 69 | 1 | 152,275,795 | 165,098,287 | 2 | 2 | 4 | 0 |
| Case 69 | 1 | 165,102,499 | 165,140,955 | 3 | 0 | 3 | 1 |
| Case 69 | 1 | 165,157,400 | 219,848,283 | 2 | 2 | 4 | 0 |
| Case 69 | 1 | 219,848,628 | 220,330,672 | 3 | 1 | 4 | 0 |
| Case 69 | 1 | 220,331,205 | 222,794,232 | 3 | 2 | 5 | 0 |
| Case 69 | 1 | 222,798,965 | 224,314,814 | 3 | 1 | 4 | 0 |
| Case 69 | 1 | 224,318,758 | 225,528,296 | 3 | 2 | 5 | 0 |
| Case 69 | 1 | 225,528,340 | 227,170,768 | 3 | 1 | 4 | 0 |
| Case 69 | 1 | 227,171,824 | 227,595,966 | 3 | 2 | 5 | 0 |
| Case 69 | 1 | 227,598,169 | 229,794,944 | 3 | 1 | 4 | 0 |
| Case 69 | 1 | 229,795,070 | 230,297,659 | 3 | 2 | 5 | 0 |
| Case 69 | 1 | 230,299,949 | 232,310,039 | 3 | 1 | 4 | 0 |
| Case 69 | 1 | 232,311,020 | 232,876,993 | 3 | 2 | 5 | 0 |
| Case 69 | 1 | 232,878,488 | 233,601,813 | 3 | 1 | 4 | 0 |
| Case 69 | 1 | 233,608,565 | 235,279,448 | 3 | 2 | 5 | 0 |
| Case 69 | 1 | 235,290,922 | 236,644,617 | 3 | 1 | 4 | 0 |
| Case 69 | 1 | 236,645,609 | 241,767,854 | 3 | 2 | 5 | 0 |

|         |   |             |             |   |   |   |   |
|---------|---|-------------|-------------|---|---|---|---|
| Case 69 | 1 | 241,768,617 | 243,471,328 | 3 | 1 | 4 | 0 |
| Case 69 | 1 | 243,471,416 | 244,528,021 | 3 | 2 | 5 | 0 |
| Case 69 | 1 | 244,528,037 | 245,352,307 | 3 | 1 | 4 | 0 |
| Case 69 | 1 | 245,358,619 | 245,371,492 | 2 | 1 | 3 | 0 |
| Case 69 | 1 | 245,374,024 | 245,543,358 | 2 | 0 | 2 | 1 |
| Case 69 | 1 | 245,550,394 | 245,578,185 | 2 | 2 | 4 | 0 |
| Case 69 | 1 | 245,581,534 | 245,856,763 | 3 | 1 | 4 | 0 |
| Case 69 | 1 | 245,861,512 | 247,537,126 | 3 | 2 | 5 | 0 |
| Case 69 | 1 | 247,537,146 | 248,005,044 | 3 | 1 | 4 | 0 |
| Case 69 | 1 | 248,005,109 | 248,342,577 | 3 | 2 | 5 | 0 |
| Case 69 | 1 | 248,343,343 | 249,218,992 | 3 | 1 | 4 | 0 |
| Case 69 | 2 | 18,674      | 17,943,015  | 2 | 2 | 4 | 0 |
| Case 69 | 2 | 17,946,243  | 18,160,897  | 3 | 2 | 5 | 0 |
| Case 69 | 2 | 18,171,812  | 43,935,725  | 2 | 2 | 4 | 0 |
| Case 69 | 2 | 43,936,230  | 44,044,255  | 2 | 1 | 3 | 0 |
| Case 69 | 2 | 44,044,680  | 44,260,752  | 2 | 2 | 4 | 0 |
| Case 69 | 2 | 44,260,914  | 44,660,699  | 2 | 1 | 3 | 0 |
| Case 69 | 2 | 44,669,724  | 46,333,694  | 2 | 2 | 4 | 0 |
| Case 69 | 2 | 46,336,974  | 47,028,590  | 2 | 1 | 3 | 0 |
| Case 69 | 2 | 47,030,724  | 47,596,102  | 2 | 2 | 4 | 0 |
| Case 69 | 2 | 47,596,124  | 48,298,383  | 2 | 1 | 3 | 0 |
| Case 69 | 2 | 48,300,241  | 48,848,295  | 2 | 2 | 4 | 0 |
| Case 69 | 2 | 48,850,230  | 48,914,951  | 2 | 1 | 3 | 0 |
| Case 69 | 2 | 48,914,999  | 49,522,163  | 2 | 2 | 4 | 0 |
| Case 69 | 2 | 49,531,903  | 52,535,407  | 2 | 1 | 3 | 0 |
| Case 69 | 2 | 52,540,372  | 53,183,877  | 2 | 2 | 4 | 0 |
| Case 69 | 2 | 53,188,267  | 53,549,075  | 2 | 1 | 3 | 0 |
| Case 69 | 2 | 53,549,197  | 53,859,017  | 2 | 2 | 4 | 0 |
| Case 69 | 2 | 53,860,007  | 54,164,848  | 2 | 1 | 3 | 0 |
| Case 69 | 2 | 54,187,868  | 55,192,082  | 2 | 2 | 4 | 0 |
| Case 69 | 2 | 55,197,967  | 56,274,120  | 2 | 1 | 3 | 0 |
| Case 69 | 2 | 56,280,428  | 58,210,239  | 2 | 2 | 4 | 0 |
| Case 69 | 2 | 58,212,803  | 58,463,541  | 2 | 1 | 3 | 0 |
| Case 69 | 2 | 58,468,445  | 61,091,950  | 2 | 2 | 4 | 0 |
| Case 69 | 2 | 61,095,245  | 61,760,912  | 2 | 1 | 3 | 0 |
| Case 69 | 2 | 61,763,647  | 62,724,752  | 2 | 2 | 4 | 0 |
| Case 69 | 2 | 62,727,154  | 63,405,218  | 2 | 1 | 3 | 0 |
| Case 69 | 2 | 63,412,605  | 64,702,082  | 2 | 2 | 4 | 0 |
| Case 69 | 2 | 64,703,286  | 64,826,469  | 2 | 1 | 3 | 0 |
| Case 69 | 2 | 64,826,959  | 65,243,773  | 2 | 2 | 4 | 0 |
| Case 69 | 2 | 65,245,365  | 65,492,486  | 2 | 1 | 3 | 0 |
| Case 69 | 2 | 65,495,283  | 68,663,873  | 2 | 2 | 4 | 0 |
| Case 69 | 2 | 68,665,732  | 68,873,059  | 2 | 1 | 3 | 0 |
| Case 69 | 2 | 68,873,071  | 70,040,144  | 2 | 2 | 4 | 0 |
| Case 69 | 2 | 70,043,249  | 70,524,606  | 2 | 1 | 3 | 0 |
| Case 69 | 2 | 70,527,998  | 71,330,331  | 2 | 2 | 4 | 0 |
| Case 69 | 2 | 71,334,998  | 71,701,352  | 2 | 1 | 3 | 0 |
| Case 69 | 2 | 71,703,364  | 79,689,572  | 2 | 2 | 4 | 0 |
| Case 69 | 2 | 79,698,996  | 80,081,856  | 2 | 1 | 3 | 0 |
| Case 69 | 2 | 80,083,806  | 81,633,206  | 2 | 2 | 4 | 0 |
| Case 69 | 2 | 81,638,922  | 82,935,171  | 2 | 1 | 3 | 0 |
| Case 69 | 2 | 82,941,261  | 83,605,769  | 2 | 2 | 4 | 0 |
| Case 69 | 2 | 83,610,841  | 85,663,680  | 2 | 1 | 3 | 0 |
| Case 69 | 2 | 85,664,399  | 86,647,363  | 2 | 2 | 4 | 0 |
| Case 69 | 2 | 86,649,747  | 88,387,509  | 2 | 1 | 3 | 0 |
| Case 69 | 2 | 88,387,517  | 92,081,640  | 2 | 2 | 4 | 0 |
| Case 69 | 2 | 95,429,424  | 116,028,220 | 2 | 2 | 4 | 0 |
| Case 69 | 2 | 116,029,766 | 116,238,748 | 2 | 1 | 3 | 0 |
| Case 69 | 2 | 116,241,186 | 134,985,235 | 2 | 2 | 4 | 0 |
| Case 69 | 2 | 134,985,914 | 135,037,917 | 3 | 1 | 4 | 0 |
| Case 69 | 2 | 135,038,848 | 137,017,060 | 2 | 2 | 4 | 0 |

|         |   |             |             |   |   |   |   |
|---------|---|-------------|-------------|---|---|---|---|
| Case 69 | 2 | 137,025,312 | 141,389,182 | 3 | 0 | 3 | 1 |
| Case 69 | 2 | 141,391,918 | 205,379,392 | 2 | 2 | 4 | 0 |
| Case 69 | 2 | 205,379,823 | 206,076,974 | 2 | 0 | 2 | 1 |
| Case 69 | 2 | 206,077,638 | 234,596,214 | 2 | 2 | 4 | 0 |
| Case 69 | 2 | 234,596,836 | 234,623,117 | 3 | 1 | 4 | 0 |
| Case 69 | 2 | 234,624,817 | 237,129,535 | 4 | 1 | 5 | 0 |
| Case 69 | 2 | 237,133,128 | 238,820,408 | 3 | 1 | 4 | 0 |
| Case 69 | 2 | 238,822,331 | 239,466,567 | 4 | 1 | 5 | 0 |
| Case 69 | 2 | 239,467,430 | 241,835,291 | 3 | 1 | 4 | 0 |
| Case 69 | 2 | 241,835,300 | 241,943,575 | 4 | 1 | 5 | 0 |
| Case 69 | 2 | 241,947,122 | 242,742,837 | 3 | 1 | 4 | 0 |
| Case 69 | 2 | 242,742,842 | 243,048,760 | 4 | 1 | 5 | 0 |
| Case 69 | 3 | 61,495      | 8,358,721   | 2 | 2 | 4 | 0 |
| Case 69 | 3 | 8,359,650   | 14,708,427  | 2 | 0 | 2 | 1 |
| Case 69 | 3 | 14,708,918  | 36,981,363  | 2 | 2 | 4 | 0 |
| Case 69 | 3 | 36,982,896  | 37,125,165  | 2 | 1 | 3 | 0 |
| Case 69 | 3 | 37,125,699  | 60,288,428  | 2 | 2 | 4 | 0 |
| Case 69 | 3 | 60,289,842  | 60,396,850  | 2 | 0 | 2 | 1 |
| Case 69 | 3 | 60,403,658  | 60,453,227  | 2 | 1 | 3 | 0 |
| Case 69 | 3 | 60,458,976  | 60,523,330  | 2 | 2 | 4 | 0 |
| Case 69 | 3 | 60,531,242  | 60,563,632  | 3 | 0 | 3 | 1 |
| Case 69 | 3 | 60,566,161  | 60,602,816  | 2 | 2 | 4 | 0 |
| Case 69 | 3 | 60,603,621  | 60,895,579  | 3 | 0 | 3 | 1 |
| Case 69 | 3 | 60,898,109  | 61,177,577  | 2 | 0 | 2 | 1 |
| Case 69 | 3 | 61,177,751  | 61,178,476  | 2 | 1 | 3 | 0 |
| Case 69 | 3 | 61,184,321  | 61,273,564  | 1 | 0 | 1 | 0 |
| Case 69 | 3 | 61,273,798  | 61,277,745  | 2 | 0 | 2 | 1 |
| Case 69 | 3 | 61,280,155  | 90,442,925  | 3 | 0 | 3 | 1 |
| Case 69 | 3 | 93,537,290  | 141,683,097 | 3 | 0 | 3 | 1 |
| Case 69 | 3 | 141,691,407 | 142,285,065 | 2 | 0 | 2 | 1 |
| Case 69 | 3 | 142,287,627 | 146,221,640 | 3 | 0 | 3 | 1 |
| Case 69 | 3 | 146,231,988 | 175,113,985 | 4 | 2 | 6 | 0 |
| Case 69 | 3 | 175,115,541 | 175,156,022 | 3 | 2 | 5 | 0 |
| Case 69 | 3 | 175,165,079 | 175,281,578 | 4 | 0 | 4 | 1 |
| Case 69 | 3 | 175,282,048 | 175,282,064 | 5 | 0 | 5 | 1 |
| Case 69 | 3 | 175,291,567 | 175,291,567 | 4 | 0 | 4 | 1 |
| Case 69 | 3 | 175,293,892 | 175,293,892 | 3 | 0 | 3 | 1 |
| Case 69 | 3 | 175,293,957 | 183,729,111 | 4 | 2 | 6 | 0 |
| Case 69 | 3 | 183,729,487 | 184,328,020 | 3 | 2 | 5 | 0 |
| Case 69 | 3 | 184,331,242 | 186,225,120 | 4 | 2 | 6 | 0 |
| Case 69 | 3 | 186,226,983 | 186,394,975 | 3 | 2 | 5 | 0 |
| Case 69 | 3 | 186,395,046 | 186,395,046 | 2 | 2 | 4 | 0 |
| Case 69 | 3 | 186,395,056 | 189,611,194 | 4 | 2 | 6 | 0 |
| Case 69 | 3 | 189,612,062 | 190,292,102 | 3 | 3 | 6 | 0 |
| Case 69 | 3 | 190,293,555 | 190,293,555 | 3 | 2 | 5 | 0 |
| Case 69 | 3 | 190,294,188 | 194,061,922 | 4 | 2 | 6 | 0 |
| Case 69 | 3 | 194,061,955 | 194,448,231 | 3 | 2 | 5 | 0 |
| Case 69 | 3 | 194,452,392 | 194,452,392 | 2 | 2 | 4 | 0 |
| Case 69 | 3 | 194,461,665 | 194,892,578 | 4 | 2 | 6 | 0 |
| Case 69 | 3 | 194,894,133 | 197,838,262 | 3 | 2 | 5 | 0 |
| Case 69 | 4 | 71,566      | 13,797,533  | 3 | 1 | 4 | 0 |
| Case 69 | 4 | 13,798,314  | 15,397,906  | 3 | 2 | 5 | 0 |
| Case 69 | 4 | 15,409,103  | 30,630,382  | 3 | 1 | 4 | 0 |
| Case 69 | 4 | 30,633,334  | 31,413,759  | 3 | 2 | 5 | 0 |
| Case 69 | 4 | 31,415,607  | 36,293,143  | 3 | 1 | 4 | 0 |
| Case 69 | 4 | 36,305,264  | 37,340,671  | 3 | 2 | 5 | 0 |
| Case 69 | 4 | 37,342,620  | 49,620,898  | 3 | 1 | 4 | 0 |
| Case 69 | 4 | 52,697,856  | 90,875,910  | 3 | 1 | 4 | 0 |
| Case 69 | 4 | 90,879,406  | 91,172,438  | 5 | 1 | 6 | 0 |
| Case 69 | 4 | 91,175,600  | 91,230,144  | 2 | 1 | 3 | 0 |
| Case 69 | 4 | 91,230,448  | 91,267,470  | 3 | 1 | 4 | 0 |



|         |   |             |             |   |   |   |   |
|---------|---|-------------|-------------|---|---|---|---|
| Case 69 | 4 | 91,269,591  | 91,490,629  | 3 | 0 | 3 | 1 |
| Case 69 | 4 | 91,500,284  | 91,653,148  | 2 | 0 | 2 | 1 |
| Case 69 | 4 | 91,661,745  | 91,674,460  | 0 | 0 | 0 | 0 |
| Case 69 | 4 | 91,676,401  | 91,806,782  | 2 | 0 | 2 | 1 |
| Case 69 | 4 | 91,816,783  | 92,028,969  | 2 | 1 | 3 | 0 |
| Case 69 | 4 | 92,036,269  | 93,136,797  | 3 | 1 | 4 | 0 |
| Case 69 | 4 | 93,146,144  | 94,884,472  | 4 | 1 | 5 | 0 |
| Case 69 | 4 | 94,887,031  | 95,223,325  | 3 | 1 | 4 | 0 |
| Case 69 | 4 | 95,223,349  | 97,637,435  | 4 | 1 | 5 | 0 |
| Case 69 | 4 | 97,644,876  | 98,330,337  | 3 | 1 | 4 | 0 |
| Case 69 | 4 | 98,333,918  | 103,590,196 | 4 | 1 | 5 | 0 |
| Case 69 | 4 | 103,595,227 | 104,275,452 | 3 | 1 | 4 | 0 |
| Case 69 | 4 | 104,282,146 | 106,264,681 | 4 | 1 | 5 | 0 |
| Case 69 | 4 | 106,270,291 | 107,281,920 | 3 | 1 | 4 | 0 |
| Case 69 | 4 | 107,282,566 | 110,365,426 | 4 | 1 | 5 | 0 |
| Case 69 | 4 | 110,369,533 | 111,281,932 | 3 | 1 | 4 | 0 |
| Case 69 | 4 | 111,283,708 | 113,269,731 | 4 | 1 | 5 | 0 |
| Case 69 | 4 | 113,272,049 | 113,578,609 | 3 | 1 | 4 | 0 |
| Case 69 | 4 | 113,579,162 | 118,219,581 | 4 | 1 | 5 | 0 |
| Case 69 | 4 | 118,221,551 | 118,532,328 | 3 | 1 | 4 | 0 |
| Case 69 | 4 | 118,536,785 | 122,235,791 | 4 | 1 | 5 | 0 |
| Case 69 | 4 | 122,241,609 | 122,475,832 | 3 | 1 | 4 | 0 |
| Case 69 | 4 | 122,482,578 | 123,066,575 | 4 | 1 | 5 | 0 |
| Case 69 | 4 | 123,073,009 | 123,542,048 | 3 | 1 | 4 | 0 |
| Case 69 | 4 | 123,545,648 | 126,239,986 | 4 | 1 | 5 | 0 |
| Case 69 | 4 | 126,240,377 | 126,412,154 | 3 | 1 | 4 | 0 |
| Case 69 | 4 | 126,412,283 | 127,525,235 | 4 | 1 | 5 | 0 |
| Case 69 | 4 | 127,529,033 | 128,367,991 | 3 | 1 | 4 | 0 |
| Case 69 | 4 | 128,377,396 | 128,608,896 | 4 | 1 | 5 | 0 |
| Case 69 | 4 | 128,608,907 | 129,232,129 | 3 | 1 | 4 | 0 |
| Case 69 | 4 | 129,239,583 | 135,735,591 | 4 | 1 | 5 | 0 |
| Case 69 | 4 | 135,735,630 | 135,864,154 | 3 | 1 | 4 | 0 |
| Case 69 | 4 | 135,886,041 | 139,070,297 | 4 | 1 | 5 | 0 |
| Case 69 | 4 | 139,079,966 | 139,305,290 | 3 | 1 | 4 | 0 |
| Case 69 | 4 | 139,308,745 | 145,419,510 | 4 | 1 | 5 | 0 |
| Case 69 | 4 | 145,424,843 | 146,824,778 | 3 | 1 | 4 | 0 |
| Case 69 | 4 | 146,825,650 | 153,546,415 | 4 | 1 | 5 | 0 |
| Case 69 | 4 | 153,548,037 | 153,896,982 | 3 | 1 | 4 | 0 |
| Case 69 | 4 | 153,897,004 | 154,135,457 | 4 | 1 | 5 | 0 |
| Case 69 | 4 | 154,135,588 | 154,673,127 | 3 | 1 | 4 | 0 |
| Case 69 | 4 | 154,675,860 | 155,085,018 | 4 | 1 | 5 | 0 |
| Case 69 | 4 | 155,099,604 | 155,764,635 | 3 | 1 | 4 | 0 |
| Case 69 | 4 | 155,766,258 | 156,185,574 | 4 | 1 | 5 | 0 |
| Case 69 | 4 | 156,189,220 | 156,751,055 | 3 | 1 | 4 | 0 |
| Case 69 | 4 | 156,751,082 | 158,057,746 | 4 | 1 | 5 | 0 |
| Case 69 | 4 | 158,064,484 | 159,590,841 | 3 | 1 | 4 | 0 |
| Case 69 | 4 | 159,592,282 | 161,703,960 | 4 | 1 | 5 | 0 |
| Case 69 | 4 | 161,705,136 | 161,707,186 | 3 | 1 | 4 | 0 |
| Case 69 | 4 | 161,713,693 | 168,080,117 | 7 | 0 | 7 | 1 |
| Case 69 | 4 | 168,084,157 | 169,432,673 | 1 | 0 | 1 | 0 |
| Case 69 | 4 | 169,432,951 | 169,433,511 | 2 | 1 | 3 | 0 |
| Case 69 | 4 | 169,434,602 | 169,788,148 | 1 | 0 | 1 | 0 |
| Case 69 | 4 | 169,801,952 | 169,801,952 | 1 | 1 | 2 | 0 |
| Case 69 | 4 | 169,812,782 | 172,997,356 | 7 | 0 | 7 | 1 |
| Case 69 | 4 | 172,999,916 | 174,401,970 | 1 | 0 | 1 | 0 |
| Case 69 | 4 | 174,425,236 | 174,458,901 | 2 | 1 | 3 | 0 |
| Case 69 | 4 | 174,459,823 | 175,891,945 | 1 | 0 | 1 | 0 |
| Case 69 | 4 | 175,894,380 | 175,899,103 | 1 | 1 | 2 | 0 |
| Case 69 | 4 | 175,908,720 | 183,626,332 | 1 | 0 | 1 | 0 |
| Case 69 | 4 | 183,628,586 | 183,850,395 | 1 | 1 | 2 | 0 |
| Case 69 | 4 | 183,858,411 | 184,694,959 | 1 | 0 | 1 | 0 |

|         |   |             |             |   |   |   |   |
|---------|---|-------------|-------------|---|---|---|---|
| Case 69 | 4 | 184,697,378 | 185,205,210 | 2 | 0 | 2 | 1 |
| Case 69 | 4 | 185,209,537 | 185,209,537 | 2 | 1 | 3 | 0 |
| Case 69 | 4 | 185,215,134 | 185,310,015 | 1 | 0 | 1 | 0 |
| Case 69 | 4 | 185,310,218 | 185,458,566 | 1 | 1 | 2 | 0 |
| Case 69 | 4 | 185,461,350 | 185,654,723 | 1 | 0 | 1 | 0 |
| Case 69 | 4 | 185,654,837 | 185,687,373 | 1 | 1 | 2 | 0 |
| Case 69 | 4 | 185,688,754 | 185,870,383 | 1 | 0 | 1 | 0 |
| Case 69 | 4 | 185,872,178 | 185,940,205 | 1 | 1 | 2 | 0 |
| Case 69 | 4 | 185,940,785 | 186,537,232 | 1 | 0 | 1 | 0 |
| Case 69 | 4 | 186,540,503 | 186,548,084 | 1 | 1 | 2 | 0 |
| Case 69 | 4 | 186,550,283 | 186,983,342 | 1 | 0 | 1 | 0 |
| Case 69 | 4 | 186,989,333 | 187,005,064 | 1 | 1 | 2 | 0 |
| Case 69 | 4 | 187,005,854 | 187,192,481 | 1 | 0 | 1 | 0 |
| Case 69 | 4 | 187,192,903 | 187,210,090 | 1 | 1 | 2 | 0 |
| Case 69 | 4 | 187,210,247 | 187,394,590 | 1 | 0 | 1 | 0 |
| Case 69 | 4 | 187,403,169 | 187,526,002 | 2 | 0 | 2 | 1 |
| Case 69 | 4 | 187,527,259 | 187,527,321 | 2 | 1 | 3 | 0 |
| Case 69 | 4 | 187,527,472 | 187,538,942 | 1 | 0 | 1 | 0 |
| Case 69 | 4 | 187,539,125 | 187,722,479 | 1 | 1 | 2 | 0 |
| Case 69 | 4 | 187,724,314 | 188,894,402 | 1 | 0 | 1 | 0 |
| Case 69 | 4 | 188,898,937 | 189,070,726 | 1 | 1 | 2 | 0 |
| Case 69 | 4 | 189,081,654 | 189,247,773 | 1 | 0 | 1 | 0 |
| Case 69 | 4 | 189,254,197 | 189,300,970 | 1 | 1 | 2 | 0 |
| Case 69 | 4 | 189,303,096 | 190,763,337 | 1 | 0 | 1 | 0 |
| Case 69 | 4 | 190,763,591 | 190,963,766 | 1 | 1 | 2 | 0 |
| Case 69 | 5 | 38,139      | 3,292,902   | 3 | 1 | 4 | 0 |
| Case 69 | 5 | 3,302,781   | 7,783,858   | 2 | 1 | 3 | 0 |
| Case 69 | 5 | 7,784,478   | 13,017,177  | 3 | 1 | 4 | 0 |
| Case 69 | 5 | 13,019,834  | 17,489,383  | 4 | 1 | 5 | 0 |
| Case 69 | 5 | 17,509,888  | 30,696,023  | 3 | 1 | 4 | 0 |
| Case 69 | 5 | 30,713,080  | 30,814,262  | 7 | 0 | 7 | 1 |
| Case 69 | 5 | 30,830,655  | 33,699,676  | 6 | 1 | 7 | 0 |
| Case 69 | 5 | 33,699,777  | 33,799,699  | 7 | 0 | 7 | 1 |
| Case 69 | 5 | 33,804,416  | 40,258,578  | 5 | 1 | 6 | 0 |
| Case 69 | 5 | 40,267,930  | 44,560,424  | 4 | 1 | 5 | 0 |
| Case 69 | 5 | 44,569,226  | 46,399,093  | 3 | 1 | 4 | 0 |
| Case 69 | 5 | 49,457,282  | 51,717,912  | 3 | 0 | 3 | 1 |
| Case 69 | 5 | 51,720,930  | 52,094,912  | 4 | 0 | 4 | 1 |
| Case 69 | 5 | 52,096,889  | 53,110,493  | 3 | 0 | 3 | 1 |
| Case 69 | 5 | 53,111,334  | 53,791,374  | 4 | 0 | 4 | 1 |
| Case 69 | 5 | 53,793,487  | 55,122,436  | 3 | 0 | 3 | 1 |
| Case 69 | 5 | 55,122,700  | 55,220,879  | 4 | 0 | 4 | 1 |
| Case 69 | 5 | 55,223,929  | 56,853,136  | 3 | 0 | 3 | 1 |
| Case 69 | 5 | 56,860,922  | 57,440,256  | 4 | 0 | 4 | 1 |
| Case 69 | 5 | 57,442,823  | 58,045,259  | 3 | 0 | 3 | 1 |
| Case 69 | 5 | 58,049,332  | 58,745,872  | 4 | 0 | 4 | 1 |
| Case 69 | 5 | 58,753,267  | 60,759,524  | 3 | 0 | 3 | 1 |
| Case 69 | 5 | 60,768,550  | 61,564,841  | 4 | 0 | 4 | 1 |
| Case 69 | 5 | 61,566,896  | 63,793,012  | 3 | 0 | 3 | 1 |
| Case 69 | 5 | 63,793,107  | 64,449,497  | 4 | 0 | 4 | 1 |
| Case 69 | 5 | 64,450,308  | 65,601,617  | 3 | 0 | 3 | 1 |
| Case 69 | 5 | 65,603,639  | 66,127,646  | 4 | 0 | 4 | 1 |
| Case 69 | 5 | 66,129,815  | 73,375,454  | 3 | 0 | 3 | 1 |
| Case 69 | 5 | 73,376,087  | 73,944,444  | 4 | 0 | 4 | 1 |
| Case 69 | 5 | 73,947,591  | 75,047,895  | 3 | 0 | 3 | 1 |
| Case 69 | 5 | 75,048,465  | 75,381,803  | 4 | 0 | 4 | 1 |
| Case 69 | 5 | 75,393,688  | 80,401,049  | 3 | 0 | 3 | 1 |
| Case 69 | 5 | 80,403,392  | 80,508,071  | 4 | 0 | 4 | 1 |
| Case 69 | 5 | 80,508,260  | 82,817,234  | 3 | 0 | 3 | 1 |
| Case 69 | 5 | 82,817,499  | 82,937,374  | 4 | 0 | 4 | 1 |
| Case 69 | 5 | 82,937,410  | 95,094,812  | 3 | 0 | 3 | 1 |

|         |   |             |             |   |   |   |   |
|---------|---|-------------|-------------|---|---|---|---|
| Case 69 | 5 | 95,096,363  | 96,066,502  | 4 | 0 | 4 | 1 |
| Case 69 | 5 | 96,070,205  | 97,402,967  | 3 | 0 | 3 | 1 |
| Case 69 | 5 | 97,406,001  | 97,809,408  | 4 | 0 | 4 | 1 |
| Case 69 | 5 | 97,817,930  | 106,564,497 | 3 | 0 | 3 | 1 |
| Case 69 | 5 | 106,569,691 | 106,881,333 | 4 | 0 | 4 | 1 |
| Case 69 | 5 | 106,884,480 | 114,713,898 | 3 | 0 | 3 | 1 |
| Case 69 | 5 | 114,718,506 | 115,323,568 | 4 | 0 | 4 | 1 |
| Case 69 | 5 | 115,323,724 | 115,695,077 | 3 | 0 | 3 | 1 |
| Case 69 | 5 | 115,696,118 | 115,961,127 | 4 | 0 | 4 | 1 |
| Case 69 | 5 | 115,961,967 | 121,786,359 | 3 | 0 | 3 | 1 |
| Case 69 | 5 | 121,786,403 | 122,622,141 | 4 | 0 | 4 | 1 |
| Case 69 | 5 | 122,626,463 | 131,075,921 | 3 | 0 | 3 | 1 |
| Case 69 | 5 | 131,107,692 | 131,233,083 | 4 | 0 | 4 | 1 |
| Case 69 | 5 | 131,251,202 | 131,251,202 | 5 | 0 | 5 | 1 |
| Case 69 | 5 | 131,258,378 | 131,369,241 | 6 | 0 | 6 | 1 |
| Case 69 | 5 | 131,370,827 | 131,370,827 | 5 | 0 | 5 | 1 |
| Case 69 | 5 | 131,394,738 | 132,556,520 | 3 | 0 | 3 | 1 |
| Case 69 | 5 | 132,556,523 | 132,747,063 | 4 | 0 | 4 | 1 |
| Case 69 | 5 | 132,747,765 | 135,355,038 | 3 | 0 | 3 | 1 |
| Case 69 | 5 | 135,363,875 | 135,795,159 | 4 | 0 | 4 | 1 |
| Case 69 | 5 | 135,825,418 | 136,476,288 | 3 | 0 | 3 | 1 |
| Case 69 | 5 | 136,476,303 | 136,706,160 | 4 | 0 | 4 | 1 |
| Case 69 | 5 | 136,708,619 | 139,931,384 | 3 | 0 | 3 | 1 |
| Case 69 | 5 | 139,931,607 | 139,931,620 | 2 | 0 | 2 | 1 |
| Case 69 | 5 | 139,931,629 | 139,931,644 | 0 | 0 | 0 | 0 |
| Case 69 | 5 | 139,931,646 | 139,931,656 | 2 | 0 | 2 | 1 |
| Case 69 | 5 | 139,931,658 | 140,531,060 | 3 | 0 | 3 | 1 |
| Case 69 | 5 | 140,531,091 | 140,589,614 | 4 | 0 | 4 | 1 |
| Case 69 | 5 | 140,589,666 | 141,023,973 | 3 | 0 | 3 | 1 |
| Case 69 | 5 | 141,023,997 | 141,243,704 | 4 | 0 | 4 | 1 |
| Case 69 | 5 | 141,243,762 | 142,162,633 | 3 | 0 | 3 | 1 |
| Case 69 | 5 | 142,165,841 | 142,633,976 | 4 | 0 | 4 | 1 |
| Case 69 | 5 | 142,639,062 | 142,780,844 | 3 | 0 | 3 | 1 |
| Case 69 | 5 | 142,781,168 | 143,225,966 | 4 | 0 | 4 | 1 |
| Case 69 | 5 | 143,226,759 | 144,064,654 | 3 | 0 | 3 | 1 |
| Case 69 | 5 | 144,065,162 | 144,462,121 | 4 | 0 | 4 | 1 |
| Case 69 | 5 | 144,464,260 | 145,206,452 | 3 | 0 | 3 | 1 |
| Case 69 | 5 | 145,210,041 | 145,453,440 | 4 | 0 | 4 | 1 |
| Case 69 | 5 | 145,463,006 | 145,742,435 | 3 | 0 | 3 | 1 |
| Case 69 | 5 | 145,749,535 | 146,539,138 | 4 | 0 | 4 | 1 |
| Case 69 | 5 | 146,540,899 | 146,737,467 | 3 | 0 | 3 | 1 |
| Case 69 | 5 | 146,743,222 | 147,088,555 | 4 | 0 | 4 | 1 |
| Case 69 | 5 | 147,088,798 | 148,431,804 | 3 | 0 | 3 | 1 |
| Case 69 | 5 | 148,431,964 | 148,659,664 | 4 | 0 | 4 | 1 |
| Case 69 | 5 | 148,663,788 | 151,411,445 | 3 | 0 | 3 | 1 |
| Case 69 | 5 | 151,426,516 | 151,888,663 | 4 | 0 | 4 | 1 |
| Case 69 | 5 | 151,889,058 | 153,865,729 | 3 | 0 | 3 | 1 |
| Case 69 | 5 | 153,867,221 | 153,986,462 | 2 | 0 | 2 | 1 |
| Case 69 | 5 | 153,990,543 | 154,643,606 | 3 | 0 | 3 | 1 |
| Case 69 | 5 | 154,648,174 | 155,003,070 | 4 | 0 | 4 | 1 |
| Case 69 | 5 | 155,006,293 | 159,627,399 | 3 | 0 | 3 | 1 |
| Case 69 | 5 | 159,633,484 | 159,720,780 | 4 | 0 | 4 | 1 |
| Case 69 | 5 | 159,721,672 | 167,115,062 | 3 | 0 | 3 | 1 |
| Case 69 | 5 | 167,120,619 | 167,657,421 | 4 | 0 | 4 | 1 |
| Case 69 | 5 | 167,658,698 | 168,194,090 | 3 | 0 | 3 | 1 |
| Case 69 | 5 | 168,194,176 | 172,813,227 | 4 | 0 | 4 | 1 |
| Case 69 | 5 | 172,818,061 | 173,022,413 | 5 | 0 | 5 | 1 |
| Case 69 | 5 | 173,023,672 | 180,693,127 | 4 | 0 | 4 | 1 |
| Case 69 | 6 | 108,666     | 1,580,403   | 3 | 1 | 4 | 0 |
| Case 69 | 6 | 1,580,604   | 1,730,861   | 3 | 2 | 5 | 0 |
| Case 69 | 6 | 1,735,174   | 28,137,454  | 3 | 1 | 4 | 0 |

|         |   |             |             |   |   |   |   |
|---------|---|-------------|-------------|---|---|---|---|
| Case 69 | 6 | 28,137,730  | 52,847,966  | 4 | 1 | 5 | 0 |
| Case 69 | 6 | 52,848,149  | 58,752,089  | 3 | 1 | 4 | 0 |
| Case 69 | 6 | 61,891,118  | 62,593,758  | 3 | 1 | 4 | 0 |
| Case 69 | 6 | 62,604,601  | 62,775,947  | 2 | 1 | 3 | 0 |
| Case 69 | 6 | 62,786,386  | 64,404,624  | 2 | 2 | 4 | 0 |
| Case 69 | 6 | 64,404,642  | 66,527,803  | 2 | 1 | 3 | 0 |
| Case 69 | 6 | 66,528,177  | 66,945,749  | 2 | 2 | 4 | 0 |
| Case 69 | 6 | 66,948,909  | 72,073,567  | 2 | 1 | 3 | 0 |
| Case 69 | 6 | 72,081,794  | 72,662,228  | 2 | 2 | 4 | 0 |
| Case 69 | 6 | 72,662,508  | 73,043,331  | 2 | 1 | 3 | 0 |
| Case 69 | 6 | 73,048,937  | 74,115,451  | 2 | 2 | 4 | 0 |
| Case 69 | 6 | 74,117,242  | 78,172,750  | 2 | 1 | 3 | 0 |
| Case 69 | 6 | 78,172,992  | 78,264,479  | 2 | 2 | 4 | 0 |
| Case 69 | 6 | 78,265,478  | 79,912,189  | 2 | 1 | 3 | 0 |
| Case 69 | 6 | 79,913,302  | 80,177,371  | 2 | 2 | 4 | 0 |
| Case 69 | 6 | 80,178,048  | 81,092,467  | 2 | 1 | 3 | 0 |
| Case 69 | 6 | 81,103,713  | 81,309,680  | 2 | 2 | 4 | 0 |
| Case 69 | 6 | 81,313,076  | 82,578,196  | 2 | 1 | 3 | 0 |
| Case 69 | 6 | 82,585,857  | 82,795,507  | 2 | 2 | 4 | 0 |
| Case 69 | 6 | 82,796,643  | 85,343,652  | 2 | 1 | 3 | 0 |
| Case 69 | 6 | 85,347,257  | 100,955,752 | 2 | 2 | 4 | 0 |
| Case 69 | 6 | 100,957,344 | 102,616,731 | 2 | 1 | 3 | 0 |
| Case 69 | 6 | 102,623,602 | 107,253,258 | 2 | 2 | 4 | 0 |
| Case 69 | 6 | 107,256,695 | 107,673,836 | 2 | 1 | 3 | 0 |
| Case 69 | 6 | 107,687,148 | 109,771,258 | 2 | 2 | 4 | 0 |
| Case 69 | 6 | 109,771,583 | 110,037,655 | 2 | 1 | 3 | 0 |
| Case 69 | 6 | 110,050,042 | 110,914,481 | 2 | 2 | 4 | 0 |
| Case 69 | 6 | 110,924,988 | 111,709,014 | 2 | 1 | 3 | 0 |
| Case 69 | 6 | 111,736,642 | 114,837,030 | 2 | 2 | 4 | 0 |
| Case 69 | 6 | 114,842,291 | 115,685,164 | 2 | 1 | 3 | 0 |
| Case 69 | 6 | 115,691,951 | 120,442,625 | 2 | 2 | 4 | 0 |
| Case 69 | 6 | 120,449,389 | 120,544,052 | 3 | 2 | 5 | 0 |
| Case 69 | 6 | 120,559,264 | 121,339,179 | 3 | 1 | 4 | 0 |
| Case 69 | 6 | 121,345,011 | 124,739,792 | 2 | 1 | 3 | 0 |
| Case 69 | 6 | 124,743,507 | 124,785,449 | 3 | 1 | 4 | 0 |
| Case 69 | 6 | 124,794,887 | 125,116,245 | 4 | 1 | 5 | 0 |
| Case 69 | 6 | 125,122,731 | 134,217,699 | 2 | 1 | 3 | 0 |
| Case 69 | 6 | 134,229,319 | 134,445,802 | 2 | 0 | 2 | 1 |
| Case 69 | 6 | 134,447,959 | 142,773,504 | 2 | 1 | 3 | 0 |
| Case 69 | 6 | 142,777,064 | 143,778,954 | 2 | 2 | 4 | 0 |
| Case 69 | 6 | 143,780,309 | 143,825,376 | 2 | 1 | 3 | 0 |
| Case 69 | 6 | 143,827,102 | 143,984,853 | 2 | 0 | 2 | 1 |
| Case 69 | 6 | 143,994,199 | 144,319,407 | 2 | 2 | 4 | 0 |
| Case 69 | 6 | 144,323,572 | 146,123,536 | 2 | 1 | 3 | 0 |
| Case 69 | 6 | 146,125,466 | 147,851,974 | 3 | 0 | 3 | 1 |
| Case 69 | 6 | 147,852,697 | 148,007,144 | 2 | 0 | 2 | 1 |
| Case 69 | 6 | 148,015,300 | 158,171,888 | 3 | 0 | 3 | 1 |
| Case 69 | 6 | 158,178,348 | 160,206,631 | 4 | 0 | 4 | 1 |
| Case 69 | 6 | 160,207,570 | 162,349,458 | 3 | 0 | 3 | 1 |
| Case 69 | 6 | 162,349,894 | 162,460,484 | 2 | 0 | 2 | 1 |
| Case 69 | 6 | 162,461,329 | 170,980,171 | 3 | 0 | 3 | 1 |
| Case 69 | 7 | 44,935      | 149,765     | 3 | 1 | 4 | 0 |
| Case 69 | 7 | 152,640     | 2,472,903   | 2 | 2 | 4 | 0 |
| Case 69 | 7 | 2,472,939   | 5,572,226   | 3 | 2 | 5 | 0 |
| Case 69 | 7 | 5,578,489   | 5,814,178   | 3 | 1 | 4 | 0 |
| Case 69 | 7 | 5,814,689   | 7,804,891   | 3 | 2 | 5 | 0 |
| Case 69 | 7 | 7,805,234   | 9,956,258   | 3 | 3 | 6 | 0 |
| Case 69 | 7 | 9,957,558   | 10,004,014  | 3 | 2 | 5 | 0 |
| Case 69 | 7 | 10,006,341  | 10,044,734  | 2 | 2 | 4 | 0 |
| Case 69 | 7 | 10,054,784  | 10,093,480  | 2 | 0 | 2 | 1 |
| Case 69 | 7 | 10,096,250  | 10,096,276  | 2 | 2 | 4 | 0 |

|         |   |             |             |   |   |   |   |
|---------|---|-------------|-------------|---|---|---|---|
| Case 69 | 7 | 10,097,230  | 10,129,376  | 3 | 2 | 5 | 0 |
| Case 69 | 7 | 10,130,272  | 13,336,448  | 3 | 3 | 6 | 0 |
| Case 69 | 7 | 13,344,549  | 13,348,832  | 3 | 2 | 5 | 0 |
| Case 69 | 7 | 13,358,216  | 13,358,803  | 2 | 2 | 4 | 0 |
| Case 69 | 7 | 13,368,677  | 14,369,455  | 4 | 2 | 6 | 0 |
| Case 69 | 7 | 14,371,050  | 16,238,691  | 3 | 3 | 6 | 0 |
| Case 69 | 7 | 16,242,073  | 18,436,019  | 3 | 2 | 5 | 0 |
| Case 69 | 7 | 18,446,741  | 18,661,409  | 3 | 1 | 4 | 0 |
| Case 69 | 7 | 18,664,580  | 43,789,148  | 3 | 2 | 5 | 0 |
| Case 69 | 7 | 43,797,453  | 45,108,137  | 2 | 2 | 4 | 0 |
| Case 69 | 7 | 45,109,145  | 47,851,531  | 3 | 2 | 5 | 0 |
| Case 69 | 7 | 47,851,578  | 47,942,035  | 2 | 2 | 4 | 0 |
| Case 69 | 7 | 47,942,082  | 56,018,666  | 3 | 2 | 5 | 0 |
| Case 69 | 7 | 56,020,992  | 58,019,061  | 2 | 2 | 4 | 0 |
| Case 69 | 7 | 61,056,053  | 64,452,698  | 2 | 2 | 4 | 0 |
| Case 69 | 7 | 64,452,738  | 66,030,612  | 3 | 2 | 5 | 0 |
| Case 69 | 7 | 66,067,032  | 67,796,657  | 2 | 2 | 4 | 0 |
| Case 69 | 7 | 67,797,507  | 72,193,854  | 3 | 2 | 5 | 0 |
| Case 69 | 7 | 72,193,868  | 76,198,932  | 2 | 2 | 4 | 0 |
| Case 69 | 7 | 76,209,459  | 78,434,965  | 3 | 2 | 5 | 0 |
| Case 69 | 7 | 78,438,407  | 82,516,932  | 3 | 3 | 6 | 0 |
| Case 69 | 7 | 82,518,391  | 82,893,679  | 3 | 2 | 5 | 0 |
| Case 69 | 7 | 82,911,915  | 85,594,984  | 3 | 3 | 6 | 0 |
| Case 69 | 7 | 85,608,916  | 87,029,867  | 3 | 2 | 5 | 0 |
| Case 69 | 7 | 87,030,665  | 87,105,795  | 3 | 3 | 6 | 0 |
| Case 69 | 7 | 87,106,265  | 87,224,772  | 3 | 2 | 5 | 0 |
| Case 69 | 7 | 87,224,925  | 88,946,197  | 3 | 3 | 6 | 0 |
| Case 69 | 7 | 88,951,963  | 88,966,204  | 3 | 2 | 5 | 0 |
| Case 69 | 7 | 88,969,883  | 89,897,703  | 3 | 3 | 6 | 0 |
| Case 69 | 7 | 89,899,975  | 90,792,408  | 3 | 2 | 5 | 0 |
| Case 69 | 7 | 90,794,795  | 91,207,699  | 3 | 3 | 6 | 0 |
| Case 69 | 7 | 91,208,600  | 97,821,824  | 3 | 2 | 5 | 0 |
| Case 69 | 7 | 97,821,849  | 102,100,127 | 2 | 2 | 4 | 0 |
| Case 69 | 7 | 102,100,207 | 127,447,548 | 3 | 2 | 5 | 0 |
| Case 69 | 7 | 127,454,026 | 127,991,133 | 2 | 2 | 4 | 0 |
| Case 69 | 7 | 127,994,132 | 150,353,227 | 3 | 2 | 5 | 0 |
| Case 69 | 7 | 150,369,447 | 151,330,390 | 2 | 2 | 4 | 0 |
| Case 69 | 7 | 151,335,260 | 154,414,010 | 3 | 2 | 5 | 0 |
| Case 69 | 7 | 154,414,361 | 154,925,087 | 2 | 2 | 4 | 0 |
| Case 69 | 7 | 154,932,794 | 155,377,430 | 3 | 2 | 5 | 0 |
| Case 69 | 7 | 155,382,621 | 156,012,230 | 2 | 2 | 4 | 0 |
| Case 69 | 7 | 156,012,506 | 156,757,453 | 3 | 2 | 5 | 0 |
| Case 69 | 7 | 156,757,513 | 159,119,486 | 2 | 2 | 4 | 0 |
| Case 69 | 8 | 164,984     | 191,226     | 1 | 1 | 2 | 0 |
| Case 69 | 8 | 193,756     | 1,681,171   | 1 | 0 | 1 | 0 |
| Case 69 | 8 | 1,681,733   | 1,791,433   | 1 | 1 | 2 | 0 |
| Case 69 | 8 | 1,794,023   | 1,807,756   | 1 | 0 | 1 | 0 |
| Case 69 | 8 | 1,808,162   | 1,839,973   | 1 | 1 | 2 | 0 |
| Case 69 | 8 | 1,840,497   | 1,905,728   | 1 | 0 | 1 | 0 |
| Case 69 | 8 | 1,905,823   | 2,061,497   | 1 | 1 | 2 | 0 |
| Case 69 | 8 | 2,063,158   | 2,089,096   | 1 | 0 | 1 | 0 |
| Case 69 | 8 | 2,091,139   | 2,104,726   | 1 | 1 | 2 | 0 |
| Case 69 | 8 | 2,104,747   | 3,193,698   | 2 | 1 | 3 | 0 |
| Case 69 | 8 | 3,194,845   | 3,264,509   | 2 | 0 | 2 | 1 |
| Case 69 | 8 | 3,265,480   | 6,129,051   | 2 | 1 | 3 | 0 |
| Case 69 | 8 | 6,136,512   | 6,155,658   | 1 | 0 | 1 | 0 |
| Case 69 | 8 | 6,159,718   | 10,372,068  | 2 | 1 | 3 | 0 |
| Case 69 | 8 | 10,377,861  | 10,755,749  | 3 | 1 | 4 | 0 |
| Case 69 | 8 | 10,755,807  | 10,914,233  | 2 | 1 | 3 | 0 |
| Case 69 | 8 | 10,924,369  | 10,924,369  | 3 | 1 | 4 | 0 |
| Case 69 | 8 | 10,937,019  | 11,623,212  | 7 | 0 | 7 | 1 |

|         |   |             |             |   |   |   |   |
|---------|---|-------------|-------------|---|---|---|---|
| Case 69 | 8 | 11,627,454  | 11,778,803  | 3 | 1 | 4 | 0 |
| Case 69 | 8 | 11,786,255  | 12,545,638  | 2 | 1 | 3 | 0 |
| Case 69 | 8 | 12,551,156  | 12,551,156  | 1 | 1 | 2 | 0 |
| Case 69 | 8 | 12,554,743  | 12,559,475  | 1 | 0 | 1 | 0 |
| Case 69 | 8 | 12,568,161  | 12,768,021  | 1 | 1 | 2 | 0 |
| Case 69 | 8 | 12,769,518  | 12,916,186  | 2 | 1 | 3 | 0 |
| Case 69 | 8 | 12,917,220  | 12,957,850  | 3 | 1 | 4 | 0 |
| Case 69 | 8 | 12,958,116  | 14,090,481  | 2 | 1 | 3 | 0 |
| Case 69 | 8 | 14,091,774  | 14,093,929  | 1 | 0 | 1 | 0 |
| Case 69 | 8 | 14,095,199  | 15,617,917  | 1 | 1 | 2 | 0 |
| Case 69 | 8 | 15,618,380  | 15,716,896  | 2 | 1 | 3 | 0 |
| Case 69 | 8 | 15,718,965  | 15,732,889  | 1 | 0 | 1 | 0 |
| Case 69 | 8 | 15,738,015  | 16,664,159  | 2 | 1 | 3 | 0 |
| Case 69 | 8 | 16,668,990  | 16,676,099  | 1 | 0 | 1 | 0 |
| Case 69 | 8 | 16,679,361  | 17,713,120  | 2 | 1 | 3 | 0 |
| Case 69 | 8 | 17,714,562  | 17,720,181  | 1 | 0 | 1 | 0 |
| Case 69 | 8 | 17,721,720  | 17,922,004  | 1 | 1 | 2 | 0 |
| Case 69 | 8 | 17,924,735  | 21,273,776  | 2 | 1 | 3 | 0 |
| Case 69 | 8 | 21,275,297  | 22,104,691  | 3 | 1 | 4 | 0 |
| Case 69 | 8 | 22,105,670  | 22,227,522  | 2 | 1 | 3 | 0 |
| Case 69 | 8 | 22,238,030  | 22,488,004  | 6 | 0 | 6 | 1 |
| Case 69 | 8 | 22,491,518  | 27,630,131  | 2 | 1 | 3 | 0 |
| Case 69 | 8 | 27,630,152  | 27,690,627  | 2 | 0 | 2 | 1 |
| Case 69 | 8 | 27,702,453  | 32,584,095  | 2 | 1 | 3 | 0 |
| Case 69 | 8 | 32,584,857  | 33,096,300  | 3 | 1 | 4 | 0 |
| Case 69 | 8 | 33,115,544  | 33,371,296  | 4 | 1 | 5 | 0 |
| Case 69 | 8 | 33,384,027  | 37,027,184  | 2 | 1 | 3 | 0 |
| Case 69 | 8 | 37,030,919  | 37,247,774  | 3 | 1 | 4 | 0 |
| Case 69 | 8 | 37,259,045  | 37,809,609  | 2 | 1 | 3 | 0 |
| Case 69 | 8 | 37,815,009  | 38,139,034  | 3 | 1 | 4 | 0 |
| Case 69 | 8 | 38,139,080  | 38,445,999  | 4 | 1 | 5 | 0 |
| Case 69 | 8 | 38,446,937  | 38,457,123  | 3 | 1 | 4 | 0 |
| Case 69 | 8 | 38,460,284  | 40,569,004  | 7 | 0 | 7 | 1 |
| Case 69 | 8 | 40,569,597  | 41,577,289  | 6 | 0 | 6 | 1 |
| Case 69 | 8 | 41,580,607  | 42,044,965  | 5 | 0 | 5 | 1 |
| Case 69 | 8 | 42,045,019  | 42,087,576  | 6 | 0 | 6 | 1 |
| Case 69 | 8 | 42,099,392  | 43,646,413  | 4 | 1 | 5 | 0 |
| Case 69 | 8 | 43,657,438  | 43,740,939  | 3 | 1 | 4 | 0 |
| Case 69 | 8 | 43,784,378  | 43,791,691  | 7 | 0 | 7 | 1 |
| Case 69 | 8 | 46,886,735  | 69,843,576  | 7 | 0 | 7 | 1 |
| Case 69 | 8 | 69,850,612  | 69,850,612  | 3 | 1 | 4 | 0 |
| Case 69 | 8 | 69,852,661  | 69,852,661  | 2 | 1 | 3 | 0 |
| Case 69 | 8 | 69,855,507  | 71,528,012  | 6 | 0 | 6 | 1 |
| Case 69 | 8 | 71,529,266  | 84,341,097  | 7 | 0 | 7 | 1 |
| Case 69 | 8 | 84,373,550  | 84,374,321  | 1 | 0 | 1 | 0 |
| Case 69 | 8 | 84,377,553  | 84,378,819  | 1 | 1 | 2 | 0 |
| Case 69 | 8 | 84,389,871  | 96,801,202  | 7 | 0 | 7 | 1 |
| Case 69 | 8 | 96,804,065  | 96,804,065  | 3 | 1 | 4 | 0 |
| Case 69 | 8 | 96,804,762  | 96,804,762  | 2 | 1 | 3 | 0 |
| Case 69 | 8 | 96,812,747  | 99,258,187  | 6 | 0 | 6 | 1 |
| Case 69 | 8 | 99,259,641  | 117,722,555 | 7 | 0 | 7 | 1 |
| Case 69 | 8 | 117,725,175 | 126,983,953 | 6 | 0 | 6 | 1 |
| Case 69 | 8 | 126,984,970 | 130,547,253 | 7 | 0 | 7 | 1 |
| Case 69 | 8 | 130,554,268 | 130,554,268 | 3 | 1 | 4 | 0 |
| Case 69 | 8 | 130,554,499 | 130,554,499 | 2 | 1 | 3 | 0 |
| Case 69 | 8 | 130,564,649 | 143,020,731 | 6 | 0 | 6 | 1 |
| Case 69 | 8 | 143,034,048 | 143,394,496 | 5 | 0 | 5 | 1 |
| Case 69 | 8 | 143,395,768 | 144,687,896 | 6 | 0 | 6 | 1 |
| Case 69 | 8 | 144,687,901 | 144,942,975 | 5 | 0 | 5 | 1 |
| Case 69 | 8 | 144,943,023 | 144,990,878 | 6 | 0 | 6 | 1 |
| Case 69 | 8 | 144,990,983 | 145,665,407 | 5 | 0 | 5 | 1 |

|         |   |             |             |   |   |   |   |
|---------|---|-------------|-------------|---|---|---|---|
| Case 69 | 8 | 145,665,422 | 146,293,414 | 6 | 0 | 6 | 1 |
| Case 69 | 9 | 46,587      | 707,463     | 2 | 0 | 2 | 1 |
| Case 69 | 9 | 710,818     | 745,219     | 3 | 0 | 3 | 1 |
| Case 69 | 9 | 745,289     | 9,045,011   | 2 | 0 | 2 | 1 |
| Case 69 | 9 | 9,047,488   | 9,756,868   | 0 | 0 | 0 | 0 |
| Case 69 | 9 | 9,763,352   | 17,409,391  | 2 | 0 | 2 | 1 |
| Case 69 | 9 | 17,415,825  | 17,415,987  | 0 | 0 | 0 | 0 |
| Case 69 | 9 | 17,416,026  | 29,198,885  | 2 | 0 | 2 | 1 |
| Case 69 | 9 | 29,198,980  | 29,226,705  | 3 | 0 | 3 | 1 |
| Case 69 | 9 | 29,226,761  | 29,233,374  | 4 | 0 | 4 | 1 |
| Case 69 | 9 | 29,234,349  | 29,640,242  | 5 | 0 | 5 | 1 |
| Case 69 | 9 | 29,647,032  | 32,618,055  | 3 | 0 | 3 | 1 |
| Case 69 | 9 | 32,618,885  | 33,463,848  | 4 | 0 | 4 | 1 |
| Case 69 | 9 | 33,464,076  | 35,555,657  | 3 | 0 | 3 | 1 |
| Case 69 | 9 | 35,556,039  | 35,826,038  | 4 | 0 | 4 | 1 |
| Case 69 | 9 | 35,826,058  | 36,732,969  | 3 | 0 | 3 | 1 |
| Case 69 | 9 | 36,736,811  | 37,081,301  | 4 | 0 | 4 | 1 |
| Case 69 | 9 | 37,092,433  | 37,865,943  | 3 | 0 | 3 | 1 |
| Case 69 | 9 | 37,866,551  | 38,395,909  | 4 | 0 | 4 | 1 |
| Case 69 | 9 | 38,395,928  | 40,800,551  | 3 | 0 | 3 | 1 |
| Case 69 | 9 | 41,290,880  | 46,944,322  | 4 | 0 | 4 | 1 |
| Case 69 | 9 | 65,629,772  | 71,686,476  | 4 | 0 | 4 | 1 |
| Case 69 | 9 | 71,687,579  | 72,979,246  | 3 | 0 | 3 | 1 |
| Case 69 | 9 | 72,989,832  | 73,284,190  | 4 | 0 | 4 | 1 |
| Case 69 | 9 | 73,287,076  | 78,762,295  | 3 | 0 | 3 | 1 |
| Case 69 | 9 | 78,762,796  | 78,959,341  | 4 | 0 | 4 | 1 |
| Case 69 | 9 | 78,959,679  | 85,338,256  | 3 | 0 | 3 | 1 |
| Case 69 | 9 | 85,339,429  | 85,615,159  | 4 | 0 | 4 | 1 |
| Case 69 | 9 | 85,615,362  | 85,806,577  | 3 | 0 | 3 | 1 |
| Case 69 | 9 | 85,808,051  | 86,332,843  | 4 | 0 | 4 | 1 |
| Case 69 | 9 | 86,347,254  | 86,696,749  | 3 | 0 | 3 | 1 |
| Case 69 | 9 | 86,700,593  | 86,955,682  | 4 | 0 | 4 | 1 |
| Case 69 | 9 | 86,956,612  | 87,769,748  | 3 | 0 | 3 | 1 |
| Case 69 | 9 | 87,771,842  | 88,154,941  | 4 | 0 | 4 | 1 |
| Case 69 | 9 | 88,159,352  | 89,655,363  | 3 | 0 | 3 | 1 |
| Case 69 | 9 | 89,655,704  | 89,954,522  | 4 | 0 | 4 | 1 |
| Case 69 | 9 | 89,955,458  | 93,570,505  | 3 | 0 | 3 | 1 |
| Case 69 | 9 | 93,571,341  | 94,037,842  | 4 | 0 | 4 | 1 |
| Case 69 | 9 | 94,037,873  | 97,464,381  | 3 | 0 | 3 | 1 |
| Case 69 | 9 | 97,466,882  | 97,735,639  | 4 | 0 | 4 | 1 |
| Case 69 | 9 | 97,738,174  | 98,209,213  | 3 | 0 | 3 | 1 |
| Case 69 | 9 | 98,209,214  | 98,497,395  | 4 | 0 | 4 | 1 |
| Case 69 | 9 | 98,497,814  | 98,923,066  | 3 | 0 | 3 | 1 |
| Case 69 | 9 | 98,923,268  | 98,985,321  | 4 | 0 | 4 | 1 |
| Case 69 | 9 | 98,988,429  | 101,008,885 | 3 | 0 | 3 | 1 |
| Case 69 | 9 | 101,010,704 | 101,243,852 | 4 | 0 | 4 | 1 |
| Case 69 | 9 | 101,248,083 | 104,323,459 | 3 | 0 | 3 | 1 |
| Case 69 | 9 | 104,324,545 | 104,624,002 | 4 | 0 | 4 | 1 |
| Case 69 | 9 | 104,625,704 | 107,545,156 | 3 | 0 | 3 | 1 |
| Case 69 | 9 | 107,545,903 | 107,968,330 | 4 | 0 | 4 | 1 |
| Case 69 | 9 | 107,969,815 | 109,410,667 | 3 | 0 | 3 | 1 |
| Case 69 | 9 | 109,417,359 | 109,898,877 | 4 | 0 | 4 | 1 |
| Case 69 | 9 | 109,900,756 | 110,112,190 | 3 | 0 | 3 | 1 |
| Case 69 | 9 | 110,113,919 | 110,887,934 | 4 | 0 | 4 | 1 |
| Case 69 | 9 | 110,888,478 | 111,360,801 | 3 | 0 | 3 | 1 |
| Case 69 | 9 | 111,362,601 | 111,650,007 | 4 | 0 | 4 | 1 |
| Case 69 | 9 | 111,650,048 | 111,946,103 | 3 | 0 | 3 | 1 |
| Case 69 | 9 | 111,950,088 | 112,284,879 | 4 | 0 | 4 | 1 |
| Case 69 | 9 | 112,291,281 | 112,873,868 | 3 | 0 | 3 | 1 |
| Case 69 | 9 | 112,874,767 | 112,923,119 | 4 | 0 | 4 | 1 |
| Case 69 | 9 | 112,925,906 | 114,335,885 | 3 | 0 | 3 | 1 |

|         |    |             |             |   |   |   |   |
|---------|----|-------------|-------------|---|---|---|---|
| Case 69 | 9  | 114,337,092 | 114,447,531 | 4 | 0 | 4 | 1 |
| Case 69 | 9  | 114,449,112 | 114,658,469 | 3 | 0 | 3 | 1 |
| Case 69 | 9  | 114,661,611 | 114,904,705 | 4 | 0 | 4 | 1 |
| Case 69 | 9  | 114,904,712 | 117,708,099 | 3 | 0 | 3 | 1 |
| Case 69 | 9  | 117,720,262 | 118,456,851 | 4 | 0 | 4 | 1 |
| Case 69 | 9  | 118,461,146 | 121,075,273 | 3 | 0 | 3 | 1 |
| Case 69 | 9  | 121,076,460 | 121,993,508 | 4 | 0 | 4 | 1 |
| Case 69 | 9  | 121,996,466 | 122,176,793 | 3 | 0 | 3 | 1 |
| Case 69 | 9  | 122,189,165 | 123,152,060 | 4 | 0 | 4 | 1 |
| Case 69 | 9  | 123,154,442 | 124,864,385 | 3 | 0 | 3 | 1 |
| Case 69 | 9  | 124,869,062 | 124,992,671 | 4 | 0 | 4 | 1 |
| Case 69 | 9  | 124,992,764 | 126,338,482 | 3 | 0 | 3 | 1 |
| Case 69 | 9  | 126,341,310 | 126,346,105 | 2 | 0 | 2 | 1 |
| Case 69 | 9  | 126,351,423 | 126,448,659 | 0 | 0 | 0 | 0 |
| Case 69 | 9  | 126,458,789 | 126,462,707 | 2 | 0 | 2 | 1 |
| Case 69 | 9  | 126,470,140 | 128,756,075 | 3 | 0 | 3 | 1 |
| Case 69 | 9  | 128,756,484 | 128,880,277 | 4 | 0 | 4 | 1 |
| Case 69 | 9  | 128,881,745 | 141,066,491 | 3 | 0 | 3 | 1 |
| Case 69 | 10 | 98,087      | 1,195,959   | 2 | 2 | 4 | 0 |
| Case 69 | 10 | 1,198,985   | 36,584,286  | 3 | 2 | 5 | 0 |
| Case 69 | 10 | 36,587,545  | 36,891,028  | 3 | 3 | 6 | 0 |
| Case 69 | 10 | 36,892,217  | 39,097,912  | 3 | 2 | 5 | 0 |
| Case 69 | 10 | 42,436,301  | 47,086,901  | 3 | 2 | 5 | 0 |
| Case 69 | 10 | 47,086,916  | 48,386,030  | 2 | 2 | 4 | 0 |
| Case 69 | 10 | 48,387,898  | 57,750,714  | 3 | 2 | 5 | 0 |
| Case 69 | 10 | 57,757,228  | 58,510,079  | 2 | 2 | 4 | 0 |
| Case 69 | 10 | 58,518,556  | 63,149,922  | 3 | 2 | 5 | 0 |
| Case 69 | 10 | 63,157,465  | 63,786,554  | 4 | 2 | 6 | 0 |
| Case 69 | 10 | 63,787,427  | 66,551,141  | 3 | 2 | 5 | 0 |
| Case 69 | 10 | 66,555,441  | 69,333,065  | 4 | 2 | 6 | 0 |
| Case 69 | 10 | 69,348,758  | 80,021,895  | 3 | 2 | 5 | 0 |
| Case 69 | 10 | 80,022,901  | 81,251,344  | 3 | 3 | 6 | 0 |
| Case 69 | 10 | 81,294,920  | 81,388,196  | 3 | 2 | 5 | 0 |
| Case 69 | 10 | 81,577,614  | 111,622,694 | 4 | 0 | 4 | 1 |
| Case 69 | 10 | 111,624,141 | 129,899,578 | 3 | 3 | 6 | 0 |
| Case 69 | 10 | 129,899,778 | 129,913,705 | 3 | 2 | 5 | 0 |
| Case 69 | 10 | 129,913,727 | 133,748,056 | 3 | 3 | 6 | 0 |
| Case 69 | 10 | 133,750,141 | 135,477,883 | 3 | 2 | 5 | 0 |
| Case 69 | 11 | 193,146     | 5,527,164   | 2 | 2 | 4 | 0 |
| Case 69 | 11 | 5,527,709   | 5,655,233   | 3 | 2 | 5 | 0 |
| Case 69 | 11 | 5,655,956   | 20,984,077  | 2 | 2 | 4 | 0 |
| Case 69 | 11 | 20,989,375  | 21,846,894  | 3 | 2 | 5 | 0 |
| Case 69 | 11 | 21,848,074  | 22,437,287  | 2 | 2 | 4 | 0 |
| Case 69 | 11 | 22,442,119  | 24,373,079  | 3 | 2 | 5 | 0 |
| Case 69 | 11 | 24,376,454  | 25,688,809  | 2 | 2 | 4 | 0 |
| Case 69 | 11 | 25,696,461  | 27,014,032  | 3 | 2 | 5 | 0 |
| Case 69 | 11 | 27,015,219  | 27,593,701  | 2 | 2 | 4 | 0 |
| Case 69 | 11 | 27,618,265  | 29,373,478  | 3 | 2 | 5 | 0 |
| Case 69 | 11 | 29,376,704  | 34,614,555  | 2 | 2 | 4 | 0 |
| Case 69 | 11 | 34,618,756  | 34,662,120  | 3 | 0 | 3 | 1 |
| Case 69 | 11 | 34,662,961  | 34,691,134  | 2 | 2 | 4 | 0 |
| Case 69 | 11 | 34,699,269  | 45,093,614  | 3 | 2 | 5 | 0 |
| Case 69 | 11 | 45,098,100  | 45,674,599  | 3 | 1 | 4 | 0 |
| Case 69 | 11 | 45,676,823  | 50,467,961  | 4 | 1 | 5 | 0 |
| Case 69 | 11 | 50,468,978  | 51,591,253  | 3 | 1 | 4 | 0 |
| Case 69 | 11 | 54,794,237  | 66,999,244  | 3 | 1 | 4 | 0 |
| Case 69 | 11 | 67,011,765  | 70,476,810  | 7 | 0 | 7 | 1 |
| Case 69 | 11 | 70,478,801  | 72,068,077  | 3 | 1 | 4 | 0 |
| Case 69 | 11 | 72,074,803  | 72,408,055  | 4 | 1 | 5 | 0 |
| Case 69 | 11 | 72,408,077  | 74,152,044  | 3 | 1 | 4 | 0 |
| Case 69 | 11 | 74,153,240  | 74,608,347  | 4 | 1 | 5 | 0 |



|         |    |             |             |   |   |   |   |
|---------|----|-------------|-------------|---|---|---|---|
| Case 69 | 11 | 74,617,443  | 101,929,618 | 3 | 1 | 4 | 0 |
| Case 69 | 11 | 101,934,867 | 102,344,923 | 3 | 0 | 3 | 1 |
| Case 69 | 11 | 102,344,999 | 102,628,052 | 4 | 0 | 4 | 1 |
| Case 69 | 11 | 102,629,293 | 103,212,919 | 3 | 0 | 3 | 1 |
| Case 69 | 11 | 103,215,631 | 103,553,195 | 4 | 0 | 4 | 1 |
| Case 69 | 11 | 103,564,065 | 104,449,474 | 3 | 0 | 3 | 1 |
| Case 69 | 11 | 104,452,042 | 105,653,069 | 4 | 0 | 4 | 1 |
| Case 69 | 11 | 105,654,319 | 108,333,536 | 3 | 0 | 3 | 1 |
| Case 69 | 11 | 108,334,321 | 109,962,432 | 4 | 0 | 4 | 1 |
| Case 69 | 11 | 109,977,505 | 110,638,732 | 3 | 0 | 3 | 1 |
| Case 69 | 11 | 110,644,532 | 111,933,088 | 4 | 0 | 4 | 1 |
| Case 69 | 11 | 111,933,355 | 112,139,158 | 3 | 0 | 3 | 1 |
| Case 69 | 11 | 112,140,332 | 113,150,050 | 4 | 0 | 4 | 1 |
| Case 69 | 11 | 113,151,099 | 113,935,094 | 3 | 0 | 3 | 1 |
| Case 69 | 11 | 113,936,466 | 114,117,921 | 4 | 0 | 4 | 1 |
| Case 69 | 11 | 114,117,994 | 114,630,293 | 3 | 0 | 3 | 1 |
| Case 69 | 11 | 114,633,879 | 116,202,789 | 4 | 0 | 4 | 1 |
| Case 69 | 11 | 116,205,687 | 117,866,403 | 3 | 0 | 3 | 1 |
| Case 69 | 11 | 117,867,189 | 118,529,635 | 4 | 0 | 4 | 1 |
| Case 69 | 11 | 118,529,703 | 119,733,857 | 3 | 0 | 3 | 1 |
| Case 69 | 11 | 119,737,648 | 119,915,024 | 4 | 0 | 4 | 1 |
| Case 69 | 11 | 119,917,309 | 120,472,569 | 3 | 0 | 3 | 1 |
| Case 69 | 11 | 120,473,377 | 121,031,063 | 4 | 0 | 4 | 1 |
| Case 69 | 11 | 121,032,819 | 121,448,090 | 3 | 0 | 3 | 1 |
| Case 69 | 11 | 121,448,108 | 122,630,289 | 4 | 0 | 4 | 1 |
| Case 69 | 11 | 122,630,672 | 123,278,907 | 3 | 0 | 3 | 1 |
| Case 69 | 11 | 123,280,309 | 123,598,918 | 4 | 0 | 4 | 1 |
| Case 69 | 11 | 123,598,941 | 123,810,604 | 3 | 0 | 3 | 1 |
| Case 69 | 11 | 123,810,745 | 123,910,740 | 4 | 0 | 4 | 1 |
| Case 69 | 11 | 123,913,397 | 124,294,256 | 3 | 0 | 3 | 1 |
| Case 69 | 11 | 124,294,349 | 124,619,682 | 4 | 0 | 4 | 1 |
| Case 69 | 11 | 124,619,709 | 125,221,281 | 3 | 0 | 3 | 1 |
| Case 69 | 11 | 125,221,410 | 125,647,298 | 4 | 0 | 4 | 1 |
| Case 69 | 11 | 125,647,897 | 126,399,532 | 3 | 0 | 3 | 1 |
| Case 69 | 11 | 126,400,534 | 126,603,928 | 4 | 0 | 4 | 1 |
| Case 69 | 11 | 126,605,034 | 127,293,049 | 3 | 0 | 3 | 1 |
| Case 69 | 11 | 127,300,006 | 128,842,906 | 4 | 0 | 4 | 1 |
| Case 69 | 11 | 128,842,940 | 129,150,067 | 3 | 0 | 3 | 1 |
| Case 69 | 11 | 129,161,105 | 129,737,989 | 4 | 0 | 4 | 1 |
| Case 69 | 11 | 129,739,546 | 130,004,113 | 3 | 0 | 3 | 1 |
| Case 69 | 11 | 130,005,478 | 130,801,649 | 4 | 0 | 4 | 1 |
| Case 69 | 11 | 130,803,634 | 131,169,949 | 3 | 0 | 3 | 1 |
| Case 69 | 11 | 131,170,006 | 131,637,662 | 4 | 0 | 4 | 1 |
| Case 69 | 11 | 131,637,822 | 131,981,706 | 3 | 0 | 3 | 1 |
| Case 69 | 11 | 131,981,852 | 133,896,537 | 4 | 0 | 4 | 1 |
| Case 69 | 11 | 133,896,873 | 134,194,937 | 3 | 0 | 3 | 1 |
| Case 69 | 11 | 134,197,635 | 134,323,342 | 4 | 0 | 4 | 1 |
| Case 69 | 11 | 134,323,455 | 134,934,063 | 3 | 0 | 3 | 1 |
| Case 69 | 12 | 191,619     | 5,080,334   | 3 | 1 | 4 | 0 |
| Case 69 | 12 | 5,080,920   | 5,145,777   | 3 | 2 | 5 | 0 |
| Case 69 | 12 | 5,149,501   | 28,110,604  | 3 | 1 | 4 | 0 |
| Case 69 | 12 | 28,111,073  | 28,958,789  | 3 | 2 | 5 | 0 |
| Case 69 | 12 | 28,967,512  | 34,819,926  | 3 | 1 | 4 | 0 |
| Case 69 | 12 | 34,826,574  | 34,853,011  | 3 | 0 | 3 | 1 |
| Case 69 | 12 | 37,876,400  | 41,756,011  | 3 | 0 | 3 | 1 |
| Case 69 | 12 | 41,756,377  | 41,999,773  | 4 | 0 | 4 | 1 |
| Case 69 | 12 | 42,008,139  | 46,515,501  | 3 | 0 | 3 | 1 |
| Case 69 | 12 | 46,516,129  | 47,421,358  | 4 | 0 | 4 | 1 |
| Case 69 | 12 | 47,422,931  | 48,192,588  | 3 | 0 | 3 | 1 |
| Case 69 | 12 | 48,192,630  | 48,596,742  | 4 | 0 | 4 | 1 |
| Case 69 | 12 | 48,596,765  | 52,226,477  | 3 | 0 | 3 | 1 |

|         |    |             |             |   |   |   |   |
|---------|----|-------------|-------------|---|---|---|---|
| Case 69 | 12 | 52,227,498  | 52,362,786  | 4 | 0 | 4 | 1 |
| Case 69 | 12 | 52,369,300  | 55,953,568  | 3 | 0 | 3 | 1 |
| Case 69 | 12 | 55,966,101  | 56,086,735  | 4 | 0 | 4 | 1 |
| Case 69 | 12 | 56,086,986  | 63,004,583  | 3 | 0 | 3 | 1 |
| Case 69 | 12 | 63,007,936  | 63,318,123  | 4 | 0 | 4 | 1 |
| Case 69 | 12 | 63,318,300  | 64,928,957  | 3 | 0 | 3 | 1 |
| Case 69 | 12 | 64,930,823  | 65,898,179  | 4 | 0 | 4 | 1 |
| Case 69 | 12 | 65,901,140  | 66,597,527  | 5 | 0 | 5 | 1 |
| Case 69 | 12 | 66,597,607  | 66,725,100  | 4 | 0 | 4 | 1 |
| Case 69 | 12 | 66,725,137  | 76,424,603  | 5 | 0 | 5 | 1 |
| Case 69 | 12 | 76,424,615  | 76,948,360  | 4 | 0 | 4 | 1 |
| Case 69 | 12 | 76,949,445  | 94,642,175  | 5 | 0 | 5 | 1 |
| Case 69 | 12 | 94,642,865  | 95,731,336  | 4 | 0 | 4 | 1 |
| Case 69 | 12 | 95,732,596  | 98,938,295  | 5 | 0 | 5 | 1 |
| Case 69 | 12 | 98,941,552  | 99,117,007  | 4 | 0 | 4 | 1 |
| Case 69 | 12 | 99,119,209  | 100,215,417 | 5 | 0 | 5 | 1 |
| Case 69 | 12 | 100,227,984 | 101,076,105 | 4 | 0 | 4 | 1 |
| Case 69 | 12 | 101,080,651 | 101,654,560 | 5 | 0 | 5 | 1 |
| Case 69 | 12 | 101,660,809 | 101,905,587 | 4 | 0 | 4 | 1 |
| Case 69 | 12 | 101,915,770 | 104,081,723 | 5 | 0 | 5 | 1 |
| Case 69 | 12 | 104,081,964 | 104,942,386 | 4 | 0 | 4 | 1 |
| Case 69 | 12 | 104,942,828 | 107,910,558 | 5 | 0 | 5 | 1 |
| Case 69 | 12 | 107,914,392 | 108,712,781 | 4 | 0 | 4 | 1 |
| Case 69 | 12 | 108,714,720 | 108,910,756 | 5 | 0 | 5 | 1 |
| Case 69 | 12 | 108,912,178 | 115,670,586 | 4 | 0 | 4 | 1 |
| Case 69 | 12 | 115,670,852 | 116,792,092 | 5 | 0 | 5 | 1 |
| Case 69 | 12 | 116,792,630 | 117,767,578 | 4 | 0 | 4 | 1 |
| Case 69 | 12 | 117,768,154 | 118,419,640 | 5 | 0 | 5 | 1 |
| Case 69 | 12 | 118,421,893 | 119,275,707 | 4 | 0 | 4 | 1 |
| Case 69 | 12 | 119,284,639 | 119,840,132 | 5 | 0 | 5 | 1 |
| Case 69 | 12 | 119,840,700 | 125,998,151 | 4 | 0 | 4 | 1 |
| Case 69 | 12 | 126,000,622 | 129,660,556 | 5 | 0 | 5 | 1 |
| Case 69 | 12 | 129,664,910 | 133,810,935 | 4 | 0 | 4 | 1 |
| Case 69 | 13 | 19,058,717  | 96,377,459  | 4 | 0 | 4 | 1 |
| Case 69 | 13 | 96,386,643  | 96,555,295  | 3 | 0 | 3 | 1 |
| Case 69 | 13 | 96,558,456  | 113,771,107 | 4 | 0 | 4 | 1 |
| Case 69 | 13 | 113,771,160 | 114,526,503 | 3 | 0 | 3 | 1 |
| Case 69 | 13 | 114,527,838 | 115,103,529 | 4 | 0 | 4 | 1 |
| Case 69 | 14 | 19,280,733  | 19,280,733  | 2 | 2 | 4 | 0 |
| Case 69 | 14 | 19,327,823  | 19,401,281  | 3 | 1 | 4 | 0 |
| Case 69 | 14 | 19,464,123  | 20,416,499  | 4 | 2 | 6 | 0 |
| Case 69 | 14 | 20,420,338  | 22,427,444  | 3 | 2 | 5 | 0 |
| Case 69 | 14 | 22,428,984  | 22,959,592  | 3 | 3 | 6 | 0 |
| Case 69 | 14 | 22,961,102  | 24,327,790  | 3 | 2 | 5 | 0 |
| Case 69 | 14 | 24,336,007  | 24,807,132  | 2 | 2 | 4 | 0 |
| Case 69 | 14 | 24,807,195  | 25,757,475  | 3 | 2 | 5 | 0 |
| Case 69 | 14 | 25,757,745  | 89,134,686  | 2 | 2 | 4 | 0 |
| Case 69 | 14 | 89,145,290  | 89,214,194  | 2 | 0 | 2 | 1 |
| Case 69 | 14 | 89,218,262  | 107,287,663 | 2 | 2 | 4 | 0 |
| Case 69 | 15 | 20,034,919  | 24,742,652  | 5 | 0 | 5 | 1 |
| Case 69 | 15 | 24,785,200  | 31,016,479  | 3 | 0 | 3 | 1 |
| Case 69 | 15 | 31,022,319  | 31,723,279  | 2 | 0 | 2 | 1 |
| Case 69 | 15 | 31,726,824  | 33,685,830  | 3 | 0 | 3 | 1 |
| Case 69 | 15 | 33,685,845  | 33,794,552  | 4 | 0 | 4 | 1 |
| Case 69 | 15 | 33,795,950  | 33,923,314  | 3 | 0 | 3 | 1 |
| Case 69 | 15 | 33,923,690  | 34,134,072  | 4 | 0 | 4 | 1 |
| Case 69 | 15 | 34,134,154  | 34,760,648  | 3 | 0 | 3 | 1 |
| Case 69 | 15 | 34,761,495  | 35,145,065  | 4 | 0 | 4 | 1 |
| Case 69 | 15 | 35,147,345  | 35,997,564  | 3 | 0 | 3 | 1 |
| Case 69 | 15 | 36,003,865  | 36,293,605  | 4 | 0 | 4 | 1 |
| Case 69 | 15 | 36,304,240  | 36,594,061  | 3 | 0 | 3 | 1 |

|         |    |            |            |   |   |   |   |
|---------|----|------------|------------|---|---|---|---|
| Case 69 | 15 | 36,596,514 | 37,454,159 | 4 | 0 | 4 | 1 |
| Case 69 | 15 | 37,454,580 | 38,153,157 | 3 | 0 | 3 | 1 |
| Case 69 | 15 | 38,157,362 | 38,524,264 | 4 | 0 | 4 | 1 |
| Case 69 | 15 | 38,528,399 | 38,786,861 | 3 | 0 | 3 | 1 |
| Case 69 | 15 | 38,790,885 | 39,243,457 | 4 | 0 | 4 | 1 |
| Case 69 | 15 | 39,243,639 | 42,430,535 | 3 | 0 | 3 | 1 |
| Case 69 | 15 | 42,431,142 | 42,463,458 | 4 | 0 | 4 | 1 |
| Case 69 | 15 | 42,468,617 | 45,397,885 | 3 | 0 | 3 | 1 |
| Case 69 | 15 | 45,397,993 | 45,453,075 | 4 | 0 | 4 | 1 |
| Case 69 | 15 | 45,453,119 | 47,660,902 | 3 | 0 | 3 | 1 |
| Case 69 | 15 | 47,661,431 | 47,825,083 | 4 | 0 | 4 | 1 |
| Case 69 | 15 | 47,828,485 | 48,100,881 | 3 | 0 | 3 | 1 |
| Case 69 | 15 | 48,105,416 | 48,210,354 | 4 | 0 | 4 | 1 |
| Case 69 | 15 | 48,211,710 | 51,414,275 | 3 | 0 | 3 | 1 |
| Case 69 | 15 | 51,416,550 | 51,698,525 | 4 | 0 | 4 | 1 |
| Case 69 | 15 | 51,725,395 | 52,981,874 | 3 | 0 | 3 | 1 |
| Case 69 | 15 | 52,983,294 | 53,669,574 | 4 | 0 | 4 | 1 |
| Case 69 | 15 | 53,670,288 | 54,190,069 | 3 | 0 | 3 | 1 |
| Case 69 | 15 | 54,191,381 | 54,529,770 | 4 | 0 | 4 | 1 |
| Case 69 | 15 | 54,531,423 | 57,574,723 | 3 | 0 | 3 | 1 |
| Case 69 | 15 | 57,575,916 | 58,203,031 | 4 | 0 | 4 | 1 |
| Case 69 | 15 | 58,210,398 | 58,442,332 | 3 | 0 | 3 | 1 |
| Case 69 | 15 | 58,442,389 | 58,839,272 | 4 | 0 | 4 | 1 |
| Case 69 | 15 | 58,839,298 | 60,580,333 | 3 | 0 | 3 | 1 |
| Case 69 | 15 | 60,582,457 | 62,121,608 | 4 | 0 | 4 | 1 |
| Case 69 | 15 | 62,122,798 | 62,359,864 | 3 | 0 | 3 | 1 |
| Case 69 | 15 | 62,359,876 | 63,323,779 | 4 | 0 | 4 | 1 |
| Case 69 | 15 | 63,323,880 | 66,396,554 | 3 | 0 | 3 | 1 |
| Case 69 | 15 | 66,397,022 | 66,496,226 | 2 | 0 | 2 | 1 |
| Case 69 | 15 | 66,498,409 | 67,322,068 | 3 | 0 | 3 | 1 |
| Case 69 | 15 | 67,324,387 | 67,528,374 | 4 | 0 | 4 | 1 |
| Case 69 | 15 | 67,528,398 | 68,612,714 | 3 | 0 | 3 | 1 |
| Case 69 | 15 | 68,613,787 | 68,703,268 | 4 | 0 | 4 | 1 |
| Case 69 | 15 | 68,704,761 | 69,808,890 | 3 | 0 | 3 | 1 |
| Case 69 | 15 | 69,822,411 | 70,925,292 | 4 | 0 | 4 | 1 |
| Case 69 | 15 | 70,938,445 | 71,410,495 | 3 | 0 | 3 | 1 |
| Case 69 | 15 | 71,414,363 | 71,734,221 | 4 | 0 | 4 | 1 |
| Case 69 | 15 | 71,737,376 | 75,942,786 | 3 | 0 | 3 | 1 |
| Case 69 | 15 | 75,944,458 | 76,071,821 | 4 | 0 | 4 | 1 |
| Case 69 | 15 | 76,072,030 | 76,426,621 | 3 | 0 | 3 | 1 |
| Case 69 | 15 | 76,427,994 | 76,726,440 | 4 | 0 | 4 | 1 |
| Case 69 | 15 | 76,726,465 | 79,266,570 | 3 | 0 | 3 | 1 |
| Case 69 | 15 | 79,266,998 | 79,855,129 | 4 | 0 | 4 | 1 |
| Case 69 | 15 | 79,856,293 | 86,243,837 | 3 | 0 | 3 | 1 |
| Case 69 | 15 | 86,245,815 | 86,822,926 | 4 | 0 | 4 | 1 |
| Case 69 | 15 | 86,824,749 | 87,847,188 | 3 | 0 | 3 | 1 |
| Case 69 | 15 | 87,848,502 | 87,882,097 | 2 | 0 | 2 | 1 |
| Case 69 | 15 | 87,883,832 | 88,214,711 | 3 | 0 | 3 | 1 |
| Case 69 | 15 | 88,215,570 | 88,265,779 | 4 | 0 | 4 | 1 |
| Case 69 | 15 | 88,272,469 | 91,909,875 | 5 | 0 | 5 | 1 |
| Case 69 | 15 | 91,912,124 | 92,272,653 | 6 | 0 | 6 | 1 |
| Case 69 | 15 | 92,273,105 | 94,670,976 | 5 | 0 | 5 | 1 |
| Case 69 | 15 | 94,674,058 | 96,608,104 | 6 | 0 | 6 | 1 |
| Case 69 | 15 | 96,608,959 | 96,816,581 | 5 | 0 | 5 | 1 |
| Case 69 | 15 | 96,830,550 | 97,566,769 | 6 | 0 | 6 | 1 |
| Case 69 | 15 | 97,571,541 | 97,593,545 | 5 | 0 | 5 | 1 |
| Case 69 | 15 | 97,593,989 | 97,911,386 | 3 | 0 | 3 | 1 |
| Case 69 | 15 | 97,915,636 | 97,915,636 | 2 | 0 | 2 | 1 |
| Case 69 | 15 | 97,921,075 | 97,925,467 | 0 | 0 | 0 | 0 |
| Case 69 | 15 | 97,929,159 | 97,972,260 | 2 | 0 | 2 | 1 |
| Case 69 | 15 | 97,982,644 | 98,304,173 | 3 | 0 | 3 | 1 |

|         |    |             |             |   |   |   |   |
|---------|----|-------------|-------------|---|---|---|---|
| Case 69 | 15 | 98,304,530  | 98,493,891  | 4 | 0 | 4 | 1 |
| Case 69 | 15 | 98,494,478  | 98,821,041  | 3 | 0 | 3 | 1 |
| Case 69 | 15 | 98,823,279  | 98,984,369  | 4 | 0 | 4 | 1 |
| Case 69 | 15 | 98,995,065  | 99,666,979  | 3 | 0 | 3 | 1 |
| Case 69 | 15 | 99,667,686  | 99,672,722  | 4 | 0 | 4 | 1 |
| Case 69 | 15 | 99,672,750  | 101,928,425 | 3 | 0 | 3 | 1 |
| Case 69 | 15 | 101,929,740 | 102,157,749 | 4 | 0 | 4 | 1 |
| Case 69 | 15 | 102,160,040 | 102,461,162 | 3 | 0 | 3 | 1 |
| Case 69 | 16 | 88,165      | 336,872     | 2 | 1 | 3 | 0 |
| Case 69 | 16 | 336,892     | 336,898     | 1 | 0 | 1 | 0 |
| Case 69 | 16 | 336,916     | 2,331,173   | 1 | 1 | 2 | 0 |
| Case 69 | 16 | 2,331,174   | 10,429,655  | 2 | 1 | 3 | 0 |
| Case 69 | 16 | 10,429,756  | 10,589,345  | 2 | 0 | 2 | 1 |
| Case 69 | 16 | 10,591,887  | 20,034,996  | 2 | 1 | 3 | 0 |
| Case 69 | 16 | 20,037,965  | 20,752,983  | 2 | 2 | 4 | 0 |
| Case 69 | 16 | 20,757,597  | 20,999,124  | 2 | 1 | 3 | 0 |
| Case 69 | 16 | 20,999,139  | 21,313,377  | 2 | 2 | 4 | 0 |
| Case 69 | 16 | 21,314,612  | 22,134,964  | 2 | 1 | 3 | 0 |
| Case 69 | 16 | 22,134,971  | 23,013,555  | 2 | 2 | 4 | 0 |
| Case 69 | 16 | 23,016,854  | 23,653,020  | 2 | 1 | 3 | 0 |
| Case 69 | 16 | 23,666,557  | 24,088,187  | 2 | 2 | 4 | 0 |
| Case 69 | 16 | 24,088,428  | 24,231,412  | 2 | 1 | 3 | 0 |
| Case 69 | 16 | 24,231,449  | 24,507,139  | 2 | 2 | 4 | 0 |
| Case 69 | 16 | 24,508,117  | 24,835,018  | 2 | 1 | 3 | 0 |
| Case 69 | 16 | 24,835,081  | 27,356,335  | 2 | 2 | 4 | 0 |
| Case 69 | 16 | 27,356,667  | 35,285,582  | 2 | 1 | 3 | 0 |
| Case 69 | 16 | 46,450,037  | 53,191,383  | 2 | 1 | 3 | 0 |
| Case 69 | 16 | 53,196,042  | 53,321,734  | 1 | 0 | 1 | 0 |
| Case 69 | 16 | 53,321,892  | 66,962,411  | 2 | 1 | 3 | 0 |
| Case 69 | 16 | 66,963,408  | 66,964,191  | 2 | 0 | 2 | 1 |
| Case 69 | 16 | 66,969,457  | 66,978,777  | 0 | 0 | 0 | 0 |
| Case 69 | 16 | 66,985,906  | 66,997,784  | 2 | 0 | 2 | 1 |
| Case 69 | 16 | 66,997,813  | 70,883,827  | 2 | 1 | 3 | 0 |
| Case 69 | 16 | 70,884,501  | 71,171,142  | 3 | 1 | 4 | 0 |
| Case 69 | 16 | 71,171,147  | 71,681,153  | 2 | 1 | 3 | 0 |
| Case 69 | 16 | 71,682,803  | 71,862,133  | 2 | 0 | 2 | 1 |
| Case 69 | 16 | 71,868,168  | 78,151,746  | 2 | 1 | 3 | 0 |
| Case 69 | 16 | 78,153,157  | 78,164,351  | 1 | 0 | 1 | 0 |
| Case 69 | 16 | 78,164,805  | 78,164,805  | 1 | 1 | 2 | 0 |
| Case 69 | 16 | 78,167,690  | 78,167,690  | 1 | 0 | 1 | 0 |
| Case 69 | 16 | 78,167,906  | 78,265,836  | 1 | 1 | 2 | 0 |
| Case 69 | 16 | 78,267,097  | 78,410,634  | 1 | 0 | 1 | 0 |
| Case 69 | 16 | 78,413,896  | 78,476,581  | 1 | 1 | 2 | 0 |
| Case 69 | 16 | 78,477,548  | 78,641,740  | 2 | 1 | 3 | 0 |
| Case 69 | 16 | 78,648,998  | 78,739,257  | 2 | 0 | 2 | 1 |
| Case 69 | 16 | 78,749,341  | 81,170,391  | 2 | 1 | 3 | 0 |
| Case 69 | 16 | 81,170,741  | 81,171,090  | 2 | 0 | 2 | 1 |
| Case 69 | 16 | 81,171,635  | 81,175,103  | 0 | 0 | 0 | 0 |
| Case 69 | 16 | 81,180,988  | 81,183,382  | 2 | 0 | 2 | 1 |
| Case 69 | 16 | 81,183,421  | 90,274,695  | 2 | 1 | 3 | 0 |
| Case 69 | 17 | 11,885      | 10,618,883  | 3 | 0 | 3 | 1 |
| Case 69 | 17 | 10,625,803  | 11,671,089  | 4 | 0 | 4 | 1 |
| Case 69 | 17 | 11,672,500  | 14,344,249  | 3 | 0 | 3 | 1 |
| Case 69 | 17 | 14,344,458  | 14,741,655  | 4 | 0 | 4 | 1 |
| Case 69 | 17 | 14,742,261  | 22,242,355  | 3 | 0 | 3 | 1 |
| Case 69 | 17 | 25,268,142  | 25,268,142  | 3 | 0 | 3 | 1 |
| Case 69 | 17 | 25,295,032  | 27,502,029  | 2 | 0 | 2 | 1 |
| Case 69 | 17 | 27,504,921  | 31,334,129  | 3 | 0 | 3 | 1 |
| Case 69 | 17 | 31,336,258  | 32,312,365  | 4 | 0 | 4 | 1 |
| Case 69 | 17 | 32,314,417  | 35,178,497  | 3 | 0 | 3 | 1 |
| Case 69 | 17 | 35,184,013  | 35,281,526  | 4 | 0 | 4 | 1 |

|         |    |            |            |   |   |   |   |
|---------|----|------------|------------|---|---|---|---|
| Case 69 | 17 | 35,282,364 | 44,408,792 | 3 | 0 | 3 | 1 |
| Case 69 | 17 | 44,580,136 | 45,050,533 | 4 | 0 | 4 | 1 |
| Case 69 | 17 | 45,051,129 | 46,563,757 | 3 | 0 | 3 | 1 |
| Case 69 | 17 | 46,567,134 | 46,738,883 | 4 | 0 | 4 | 1 |
| Case 69 | 17 | 46,743,914 | 49,446,433 | 3 | 0 | 3 | 1 |
| Case 69 | 17 | 49,446,896 | 50,467,639 | 4 | 0 | 4 | 1 |
| Case 69 | 17 | 50,472,547 | 51,896,003 | 3 | 0 | 3 | 1 |
| Case 69 | 17 | 51,899,649 | 51,914,886 | 4 | 0 | 4 | 1 |
| Case 69 | 17 | 51,923,536 | 53,320,060 | 3 | 0 | 3 | 1 |
| Case 69 | 17 | 53,322,324 | 53,392,852 | 4 | 0 | 4 | 1 |
| Case 69 | 17 | 53,397,150 | 53,453,103 | 3 | 0 | 3 | 1 |
| Case 69 | 17 | 53,455,706 | 53,544,670 | 4 | 0 | 4 | 1 |
| Case 69 | 17 | 53,554,764 | 54,580,408 | 3 | 0 | 3 | 1 |
| Case 69 | 17 | 54,585,660 | 54,967,404 | 4 | 0 | 4 | 1 |
| Case 69 | 17 | 54,967,528 | 55,522,384 | 3 | 0 | 3 | 1 |
| Case 69 | 17 | 55,522,450 | 55,765,804 | 4 | 0 | 4 | 1 |
| Case 69 | 17 | 55,767,444 | 56,436,023 | 3 | 0 | 3 | 1 |
| Case 69 | 17 | 56,436,109 | 56,621,286 | 4 | 0 | 4 | 1 |
| Case 69 | 17 | 56,621,519 | 59,340,859 | 3 | 0 | 3 | 1 |
| Case 69 | 17 | 59,342,375 | 59,669,134 | 4 | 0 | 4 | 1 |
| Case 69 | 17 | 59,669,889 | 63,352,965 | 3 | 0 | 3 | 1 |
| Case 69 | 17 | 63,353,913 | 63,726,734 | 4 | 0 | 4 | 1 |
| Case 69 | 17 | 63,726,773 | 64,513,878 | 3 | 0 | 3 | 1 |
| Case 69 | 17 | 64,517,960 | 65,065,890 | 4 | 0 | 4 | 1 |
| Case 69 | 17 | 65,066,096 | 66,303,352 | 3 | 0 | 3 | 1 |
| Case 69 | 17 | 66,303,666 | 66,864,240 | 4 | 0 | 4 | 1 |
| Case 69 | 17 | 66,864,324 | 67,420,433 | 3 | 0 | 3 | 1 |
| Case 69 | 17 | 67,422,367 | 68,037,136 | 4 | 0 | 4 | 1 |
| Case 69 | 17 | 68,048,572 | 68,990,369 | 3 | 0 | 3 | 1 |
| Case 69 | 17 | 68,992,972 | 69,533,225 | 4 | 0 | 4 | 1 |
| Case 69 | 17 | 69,534,344 | 70,074,148 | 3 | 0 | 3 | 1 |
| Case 69 | 17 | 70,086,350 | 70,790,777 | 4 | 0 | 4 | 1 |
| Case 69 | 17 | 70,792,557 | 81,060,040 | 3 | 0 | 3 | 1 |
| Case 69 | 18 | 87,505     | 15,375,878 | 2 | 1 | 3 | 0 |
| Case 69 | 18 | 18,520,354 | 19,080,209 | 2 | 1 | 3 | 0 |
| Case 69 | 18 | 19,093,933 | 19,156,645 | 3 | 1 | 4 | 0 |
| Case 69 | 18 | 19,177,285 | 20,683,093 | 7 | 0 | 7 | 1 |
| Case 69 | 18 | 20,691,263 | 20,691,263 | 3 | 1 | 4 | 0 |
| Case 69 | 18 | 20,700,413 | 22,721,515 | 5 | 1 | 6 | 0 |
| Case 69 | 18 | 22,722,077 | 22,830,779 | 4 | 1 | 5 | 0 |
| Case 69 | 18 | 22,842,053 | 23,225,488 | 3 | 1 | 4 | 0 |
| Case 69 | 18 | 23,230,546 | 24,123,067 | 7 | 0 | 7 | 1 |
| Case 69 | 18 | 24,125,684 | 24,358,956 | 3 | 1 | 4 | 0 |
| Case 69 | 18 | 24,362,758 | 25,039,212 | 4 | 1 | 5 | 0 |
| Case 69 | 18 | 25,048,913 | 25,644,458 | 2 | 1 | 3 | 0 |
| Case 69 | 18 | 25,647,288 | 25,647,288 | 3 | 1 | 4 | 0 |
| Case 69 | 18 | 25,650,000 | 26,037,479 | 7 | 0 | 7 | 1 |
| Case 69 | 18 | 26,045,622 | 26,049,216 | 3 | 1 | 4 | 0 |
| Case 69 | 18 | 26,055,555 | 29,407,246 | 2 | 1 | 3 | 0 |
| Case 69 | 18 | 29,409,319 | 29,511,423 | 2 | 0 | 2 | 1 |
| Case 69 | 18 | 29,527,884 | 36,153,889 | 2 | 1 | 3 | 0 |
| Case 69 | 18 | 36,160,017 | 36,532,976 | 1 | 0 | 1 | 0 |
| Case 69 | 18 | 36,537,526 | 51,024,516 | 2 | 1 | 3 | 0 |
| Case 69 | 18 | 51,025,796 | 69,495,322 | 2 | 2 | 4 | 0 |
| Case 69 | 18 | 69,495,815 | 69,935,826 | 2 | 1 | 3 | 0 |
| Case 69 | 18 | 69,940,218 | 76,707,478 | 2 | 2 | 4 | 0 |
| Case 69 | 18 | 76,711,024 | 77,163,929 | 2 | 1 | 3 | 0 |
| Case 69 | 18 | 77,164,243 | 78,015,180 | 2 | 2 | 4 | 0 |
| Case 69 | 19 | 260,912    | 24,629,285 | 3 | 0 | 3 | 1 |
| Case 69 | 19 | 27,732,159 | 33,470,924 | 3 | 0 | 3 | 1 |
| Case 69 | 19 | 33,476,866 | 59,097,160 | 4 | 0 | 4 | 1 |

|         |    |            |            |   |   |   |   |
|---------|----|------------|------------|---|---|---|---|
| Case 69 | 20 | 63,244     | 6,640,836  | 4 | 0 | 4 | 1 |
| Case 69 | 20 | 6,643,172  | 7,595,488  | 5 | 0 | 5 | 1 |
| Case 69 | 20 | 7,601,460  | 8,006,128  | 4 | 0 | 4 | 1 |
| Case 69 | 20 | 8,007,491  | 9,011,322  | 5 | 0 | 5 | 1 |
| Case 69 | 20 | 9,012,010  | 9,162,109  | 4 | 0 | 4 | 1 |
| Case 69 | 20 | 9,164,119  | 9,951,283  | 5 | 0 | 5 | 1 |
| Case 69 | 20 | 9,952,845  | 10,726,128 | 4 | 0 | 4 | 1 |
| Case 69 | 20 | 10,726,917 | 11,670,266 | 5 | 0 | 5 | 1 |
| Case 69 | 20 | 11,682,450 | 13,970,791 | 4 | 0 | 4 | 1 |
| Case 69 | 20 | 13,971,152 | 14,780,319 | 3 | 0 | 3 | 1 |
| Case 69 | 20 | 14,781,684 | 14,785,705 | 2 | 0 | 2 | 1 |
| Case 69 | 20 | 14,794,361 | 14,865,156 | 0 | 0 | 0 | 0 |
| Case 69 | 20 | 14,867,228 | 15,031,044 | 2 | 0 | 2 | 1 |
| Case 69 | 20 | 15,037,065 | 15,041,361 | 3 | 0 | 3 | 1 |
| Case 69 | 20 | 15,041,578 | 15,264,901 | 4 | 0 | 4 | 1 |
| Case 69 | 20 | 15,267,242 | 24,938,195 | 5 | 0 | 5 | 1 |
| Case 69 | 20 | 24,939,601 | 25,723,632 | 4 | 0 | 4 | 1 |
| Case 69 | 20 | 25,730,968 | 26,293,985 | 5 | 0 | 5 | 1 |
| Case 69 | 20 | 29,425,357 | 37,667,182 | 5 | 0 | 5 | 1 |
| Case 69 | 20 | 37,673,967 | 43,834,313 | 6 | 0 | 6 | 1 |
| Case 69 | 20 | 43,836,015 | 43,897,362 | 5 | 0 | 5 | 1 |
| Case 69 | 20 | 43,897,590 | 56,098,733 | 6 | 0 | 6 | 1 |
| Case 69 | 20 | 56,098,806 | 56,140,711 | 5 | 0 | 5 | 1 |
| Case 69 | 20 | 56,140,726 | 60,312,387 | 6 | 0 | 6 | 1 |
| Case 69 | 20 | 60,313,492 | 62,948,788 | 5 | 0 | 5 | 1 |
| Case 69 | 21 | 10,827,533 | 10,942,992 | 2 | 0 | 2 | 1 |
| Case 69 | 21 | 10,970,025 | 10,971,337 | 2 | 2 | 4 | 0 |
| Case 69 | 21 | 14,368,320 | 17,150,333 | 2 | 2 | 4 | 0 |
| Case 69 | 21 | 17,166,671 | 19,167,479 | 3 | 2 | 5 | 0 |
| Case 69 | 21 | 19,167,581 | 19,169,133 | 2 | 2 | 4 | 0 |
| Case 69 | 21 | 19,169,155 | 19,607,543 | 4 | 2 | 6 | 0 |
| Case 69 | 21 | 19,620,419 | 19,814,993 | 2 | 1 | 3 | 0 |
| Case 69 | 21 | 19,815,521 | 22,482,247 | 2 | 2 | 4 | 0 |
| Case 69 | 21 | 22,483,336 | 22,718,691 | 2 | 1 | 3 | 0 |
| Case 69 | 21 | 22,722,989 | 23,783,406 | 5 | 1 | 6 | 0 |
| Case 69 | 21 | 23,787,309 | 24,610,614 | 2 | 1 | 3 | 0 |
| Case 69 | 21 | 24,613,586 | 24,752,694 | 2 | 2 | 4 | 0 |
| Case 69 | 21 | 24,762,671 | 24,971,873 | 2 | 1 | 3 | 0 |
| Case 69 | 21 | 24,973,510 | 33,642,808 | 2 | 2 | 4 | 0 |
| Case 69 | 21 | 33,642,837 | 34,319,784 | 2 | 1 | 3 | 0 |
| Case 69 | 21 | 34,320,365 | 34,753,038 | 2 | 2 | 4 | 0 |
| Case 69 | 21 | 34,759,876 | 35,193,395 | 2 | 1 | 3 | 0 |
| Case 69 | 21 | 35,199,880 | 40,550,534 | 2 | 2 | 4 | 0 |
| Case 69 | 21 | 40,551,877 | 40,807,360 | 2 | 1 | 3 | 0 |
| Case 69 | 21 | 40,816,339 | 44,272,389 | 2 | 2 | 4 | 0 |
| Case 69 | 21 | 44,273,813 | 44,486,404 | 2 | 1 | 3 | 0 |
| Case 69 | 21 | 44,486,463 | 44,721,579 | 2 | 2 | 4 | 0 |
| Case 69 | 21 | 44,722,695 | 45,108,038 | 2 | 1 | 3 | 0 |
| Case 69 | 21 | 45,108,044 | 45,491,915 | 2 | 2 | 4 | 0 |
| Case 69 | 21 | 45,494,290 | 46,057,651 | 2 | 1 | 3 | 0 |
| Case 69 | 21 | 46,057,656 | 46,698,256 | 2 | 2 | 4 | 0 |
| Case 69 | 21 | 46,702,264 | 46,821,491 | 2 | 1 | 3 | 0 |
| Case 69 | 21 | 46,821,757 | 46,876,044 | 2 | 2 | 4 | 0 |
| Case 69 | 21 | 46,876,045 | 48,100,155 | 2 | 1 | 3 | 0 |
| Case 69 | 22 | 16,114,244 | 16,456,970 | 5 | 0 | 5 | 1 |
| Case 69 | 22 | 16,515,222 | 17,280,822 | 3 | 0 | 3 | 1 |
| Case 69 | 22 | 17,280,882 | 19,889,423 | 4 | 0 | 4 | 1 |
| Case 69 | 22 | 19,889,825 | 20,132,858 | 3 | 0 | 3 | 1 |
| Case 69 | 22 | 20,135,961 | 38,025,556 | 4 | 0 | 4 | 1 |
| Case 69 | 22 | 38,026,059 | 38,536,076 | 3 | 0 | 3 | 1 |
| Case 69 | 22 | 38,539,282 | 46,541,227 | 4 | 0 | 4 | 1 |

|         |    |             |             |   |   |   |   |
|---------|----|-------------|-------------|---|---|---|---|
| Case 69 | 22 | 46,545,945  | 46,795,141  | 3 | 0 | 3 | 1 |
| Case 69 | 22 | 46,795,523  | 50,186,514  | 4 | 0 | 4 | 1 |
| Case 69 | 22 | 50,187,715  | 50,978,262  | 3 | 0 | 3 | 1 |
| Case 69 | 22 | 50,980,818  | 51,195,728  | 4 | 0 | 4 | 1 |
| Case 70 | 1  | 82,154      | 93,297,180  | 2 | 1 | 3 | 0 |
| Case 70 | 1  | 93,303,603  | 121,346,616 | 2 | 0 | 2 | 1 |
| Case 70 | 1  | 142,649,718 | 144,816,621 | 2 | 0 | 2 | 1 |
| Case 70 | 1  | 144,854,574 | 145,696,168 | 2 | 1 | 3 | 0 |
| Case 70 | 1  | 145,698,959 | 147,381,444 | 2 | 2 | 4 | 0 |
| Case 70 | 1  | 147,381,558 | 149,908,108 | 2 | 1 | 3 | 0 |
| Case 70 | 1  | 149,909,495 | 149,938,745 | 2 | 2 | 4 | 0 |
| Case 70 | 1  | 149,943,111 | 150,811,005 | 3 | 1 | 4 | 0 |
| Case 70 | 1  | 150,814,174 | 151,260,715 | 2 | 1 | 3 | 0 |
| Case 70 | 1  | 151,262,200 | 151,824,089 | 2 | 2 | 4 | 0 |
| Case 70 | 1  | 151,824,781 | 152,331,354 | 2 | 1 | 3 | 0 |
| Case 70 | 1  | 152,343,893 | 155,203,060 | 2 | 2 | 4 | 0 |
| Case 70 | 1  | 155,205,022 | 156,083,468 | 2 | 1 | 3 | 0 |
| Case 70 | 1  | 156,088,526 | 157,910,302 | 2 | 2 | 4 | 0 |
| Case 70 | 1  | 157,914,330 | 158,701,420 | 2 | 1 | 3 | 0 |
| Case 70 | 1  | 158,704,144 | 159,785,428 | 2 | 2 | 4 | 0 |
| Case 70 | 1  | 159,785,447 | 161,187,847 | 2 | 1 | 3 | 0 |
| Case 70 | 1  | 161,189,713 | 234,764,925 | 2 | 2 | 4 | 0 |
| Case 70 | 1  | 234,764,966 | 234,851,396 | 2 | 1 | 3 | 0 |
| Case 70 | 1  | 234,853,059 | 235,114,594 | 3 | 1 | 4 | 0 |
| Case 70 | 1  | 235,115,509 | 235,499,263 | 2 | 1 | 3 | 0 |
| Case 70 | 1  | 235,500,649 | 236,702,210 | 2 | 2 | 4 | 0 |
| Case 70 | 1  | 236,702,219 | 236,898,395 | 2 | 1 | 3 | 0 |
| Case 70 | 1  | 236,899,042 | 245,572,481 | 2 | 2 | 4 | 0 |
| Case 70 | 1  | 245,572,552 | 245,774,993 | 3 | 0 | 3 | 1 |
| Case 70 | 1  | 245,775,183 | 245,793,993 | 1 | 1 | 2 | 0 |
| Case 70 | 1  | 245,804,664 | 245,808,095 | 2 | 1 | 3 | 0 |
| Case 70 | 1  | 245,809,479 | 246,001,034 | 2 | 2 | 4 | 0 |
| Case 70 | 1  | 246,001,939 | 249,218,992 | 2 | 1 | 3 | 0 |
| Case 70 | 2  | 18,674      | 43,109,042  | 2 | 1 | 3 | 0 |
| Case 70 | 2  | 43,109,583  | 43,419,886  | 3 | 1 | 4 | 0 |
| Case 70 | 2  | 43,423,870  | 92,081,640  | 2 | 1 | 3 | 0 |
| Case 70 | 2  | 95,429,424  | 222,430,983 | 2 | 1 | 3 | 0 |
| Case 70 | 2  | 222,432,320 | 222,721,065 | 2 | 0 | 2 | 1 |
| Case 70 | 2  | 222,729,505 | 243,048,760 | 2 | 1 | 3 | 0 |
| Case 70 | 3  | 61,495      | 58,148,979  | 2 | 0 | 2 | 1 |
| Case 70 | 3  | 58,149,042  | 58,149,417  | 2 | 1 | 3 | 0 |
| Case 70 | 3  | 58,154,223  | 58,849,291  | 3 | 0 | 3 | 1 |
| Case 70 | 3  | 58,849,343  | 60,095,853  | 2 | 0 | 2 | 1 |
| Case 70 | 3  | 60,098,968  | 60,292,606  | 3 | 0 | 3 | 1 |
| Case 70 | 3  | 60,295,081  | 60,643,045  | 1 | 0 | 1 | 0 |
| Case 70 | 3  | 60,647,540  | 90,442,925  | 2 | 0 | 2 | 1 |
| Case 70 | 3  | 93,537,290  | 93,537,290  | 2 | 0 | 2 | 1 |
| Case 70 | 3  | 93,545,404  | 93,776,736  | 2 | 1 | 3 | 0 |
| Case 70 | 3  | 93,779,860  | 121,324,643 | 2 | 2 | 4 | 0 |
| Case 70 | 3  | 121,324,957 | 121,670,405 | 2 | 1 | 3 | 0 |
| Case 70 | 3  | 121,705,842 | 195,474,176 | 2 | 2 | 4 | 0 |
| Case 70 | 3  | 195,475,900 | 195,902,930 | 2 | 1 | 3 | 0 |
| Case 70 | 3  | 195,904,315 | 197,238,540 | 2 | 2 | 4 | 0 |
| Case 70 | 3  | 197,238,780 | 197,838,262 | 2 | 1 | 3 | 0 |
| Case 70 | 4  | 71,566      | 71,566      | 3 | 0 | 3 | 1 |
| Case 70 | 4  | 74,983      | 442,021     | 1 | 0 | 1 | 0 |
| Case 70 | 4  | 445,794     | 1,988,193   | 1 | 1 | 2 | 0 |
| Case 70 | 4  | 1,989,684   | 2,065,658   | 3 | 1 | 4 | 0 |
| Case 70 | 4  | 2,065,946   | 2,307,012   | 1 | 0 | 1 | 0 |
| Case 70 | 4  | 2,307,087   | 49,620,898  | 1 | 1 | 2 | 0 |
| Case 70 | 4  | 52,697,856  | 190,963,766 | 1 | 1 | 2 | 0 |

|         |   |             |             |   |   |   |   |
|---------|---|-------------|-------------|---|---|---|---|
| Case 70 | 5 | 38,139      | 21,844,034  | 2 | 0 | 2 | 1 |
| Case 70 | 5 | 21,847,419  | 21,906,641  | 2 | 1 | 3 | 0 |
| Case 70 | 5 | 21,907,093  | 21,999,692  | 3 | 0 | 3 | 1 |
| Case 70 | 5 | 22,006,171  | 24,264,090  | 1 | 0 | 1 | 0 |
| Case 70 | 5 | 24,269,794  | 24,274,495  | 2 | 1 | 3 | 0 |
| Case 70 | 5 | 24,279,987  | 46,399,093  | 2 | 0 | 2 | 1 |
| Case 70 | 5 | 49,457,282  | 70,979,768  | 2 | 0 | 2 | 1 |
| Case 70 | 5 | 70,980,721  | 71,169,505  | 4 | 0 | 4 | 1 |
| Case 70 | 5 | 71,174,721  | 149,901,055 | 2 | 0 | 2 | 1 |
| Case 70 | 5 | 149,901,150 | 149,937,739 | 2 | 1 | 3 | 0 |
| Case 70 | 5 | 149,946,821 | 150,428,195 | 3 | 0 | 3 | 1 |
| Case 70 | 5 | 150,428,871 | 180,693,127 | 2 | 0 | 2 | 1 |
| Case 70 | 6 | 108,666     | 19,529,446  | 2 | 0 | 2 | 1 |
| Case 70 | 6 | 19,532,627  | 19,532,627  | 2 | 1 | 3 | 0 |
| Case 70 | 6 | 19,534,362  | 19,575,499  | 1 | 1 | 2 | 0 |
| Case 70 | 6 | 19,589,595  | 19,660,872  | 7 | 0 | 7 | 1 |
| Case 70 | 6 | 19,664,481  | 21,298,458  | 5 | 1 | 6 | 0 |
| Case 70 | 6 | 21,299,738  | 21,312,967  | 3 | 1 | 4 | 0 |
| Case 70 | 6 | 21,313,844  | 21,332,460  | 2 | 1 | 3 | 0 |
| Case 70 | 6 | 21,334,986  | 27,351,931  | 2 | 2 | 4 | 0 |
| Case 70 | 6 | 27,353,114  | 28,244,741  | 2 | 1 | 3 | 0 |
| Case 70 | 6 | 28,250,236  | 29,732,302  | 2 | 2 | 4 | 0 |
| Case 70 | 6 | 29,732,430  | 30,209,493  | 2 | 1 | 3 | 0 |
| Case 70 | 6 | 30,209,515  | 30,389,323  | 2 | 2 | 4 | 0 |
| Case 70 | 6 | 30,391,723  | 30,719,909  | 2 | 1 | 3 | 0 |
| Case 70 | 6 | 30,720,311  | 31,079,703  | 2 | 2 | 4 | 0 |
| Case 70 | 6 | 31,079,754  | 31,125,823  | 3 | 1 | 4 | 0 |
| Case 70 | 6 | 31,126,252  | 31,428,967  | 2 | 1 | 3 | 0 |
| Case 70 | 6 | 31,429,927  | 31,651,247  | 2 | 2 | 4 | 0 |
| Case 70 | 6 | 31,654,448  | 32,158,319  | 2 | 1 | 3 | 0 |
| Case 70 | 6 | 32,159,157  | 32,273,765  | 2 | 2 | 4 | 0 |
| Case 70 | 6 | 32,274,756  | 32,298,814  | 2 | 1 | 3 | 0 |
| Case 70 | 6 | 32,298,942  | 32,434,939  | 2 | 2 | 4 | 0 |
| Case 70 | 6 | 32,435,044  | 32,548,032  | 2 | 1 | 3 | 0 |
| Case 70 | 6 | 32,548,464  | 32,788,878  | 2 | 2 | 4 | 0 |
| Case 70 | 6 | 32,789,480  | 32,981,555  | 2 | 1 | 3 | 0 |
| Case 70 | 6 | 32,981,647  | 33,179,062  | 2 | 2 | 4 | 0 |
| Case 70 | 6 | 33,179,660  | 33,638,949  | 2 | 1 | 3 | 0 |
| Case 70 | 6 | 33,639,821  | 42,835,487  | 2 | 2 | 4 | 0 |
| Case 70 | 6 | 42,836,583  | 43,172,843  | 2 | 1 | 3 | 0 |
| Case 70 | 6 | 43,173,161  | 45,530,471  | 2 | 2 | 4 | 0 |
| Case 70 | 6 | 45,530,668  | 48,925,998  | 4 | 2 | 6 | 0 |
| Case 70 | 6 | 48,928,544  | 58,752,089  | 2 | 1 | 3 | 0 |
| Case 70 | 6 | 61,891,118  | 87,491,157  | 2 | 1 | 3 | 0 |
| Case 70 | 6 | 87,492,241  | 92,941,472  | 1 | 1 | 2 | 0 |
| Case 70 | 6 | 92,942,447  | 119,591,307 | 2 | 1 | 3 | 0 |
| Case 70 | 6 | 119,592,620 | 120,983,610 | 3 | 1 | 4 | 0 |
| Case 70 | 6 | 120,985,483 | 125,921,642 | 2 | 1 | 3 | 0 |
| Case 70 | 6 | 125,922,477 | 126,334,193 | 3 | 1 | 4 | 0 |
| Case 70 | 6 | 126,334,241 | 135,487,614 | 2 | 1 | 3 | 0 |
| Case 70 | 6 | 135,490,898 | 135,680,464 | 3 | 1 | 4 | 0 |
| Case 70 | 6 | 135,696,597 | 148,614,267 | 2 | 1 | 3 | 0 |
| Case 70 | 6 | 148,617,199 | 148,869,636 | 2 | 0 | 2 | 1 |
| Case 70 | 6 | 148,869,910 | 155,337,220 | 2 | 1 | 3 | 0 |
| Case 70 | 6 | 155,345,181 | 155,695,650 | 4 | 1 | 5 | 0 |
| Case 70 | 6 | 155,697,906 | 155,742,113 | 2 | 2 | 4 | 0 |
| Case 70 | 6 | 155,743,245 | 155,743,917 | 2 | 1 | 3 | 0 |
| Case 70 | 6 | 155,748,212 | 155,749,404 | 1 | 1 | 2 | 0 |
| Case 70 | 6 | 155,750,012 | 156,122,600 | 7 | 0 | 7 | 1 |
| Case 70 | 6 | 156,126,988 | 156,290,380 | 6 | 1 | 7 | 0 |
| Case 70 | 6 | 156,293,797 | 156,348,083 | 3 | 1 | 4 | 0 |



|         |    |             |             |   |   |   |   |
|---------|----|-------------|-------------|---|---|---|---|
| Case 70 | 6  | 156,348,805 | 170,980,171 | 2 | 0 | 2 | 1 |
| Case 70 | 7  | 44,935      | 1,203,957   | 2 | 1 | 3 | 0 |
| Case 70 | 7  | 1,213,127   | 5,477,922   | 3 | 1 | 4 | 0 |
| Case 70 | 7  | 5,480,451   | 7,152,178   | 2 | 1 | 3 | 0 |
| Case 70 | 7  | 7,163,442   | 11,334,427  | 3 | 1 | 4 | 0 |
| Case 70 | 7  | 11,335,132  | 11,451,932  | 2 | 1 | 3 | 0 |
| Case 70 | 7  | 11,456,165  | 11,938,060  | 2 | 0 | 2 | 1 |
| Case 70 | 7  | 11,938,607  | 26,232,150  | 2 | 1 | 3 | 0 |
| Case 70 | 7  | 26,234,302  | 52,917,246  | 3 | 1 | 4 | 0 |
| Case 70 | 7  | 52,922,213  | 54,781,060  | 2 | 1 | 3 | 0 |
| Case 70 | 7  | 54,783,915  | 56,049,918  | 3 | 1 | 4 | 0 |
| Case 70 | 7  | 56,049,954  | 56,681,252  | 3 | 0 | 3 | 1 |
| Case 70 | 7  | 56,689,209  | 58,019,061  | 1 | 0 | 1 | 0 |
| Case 70 | 7  | 61,056,053  | 62,641,533  | 1 | 0 | 1 | 0 |
| Case 70 | 7  | 62,656,497  | 73,826,693  | 1 | 1 | 2 | 0 |
| Case 70 | 7  | 73,862,412  | 100,674,464 | 2 | 1 | 3 | 0 |
| Case 70 | 7  | 100,674,467 | 100,691,291 | 1 | 1 | 2 | 0 |
| Case 70 | 7  | 100,691,298 | 159,119,486 | 2 | 1 | 3 | 0 |
| Case 70 | 8  | 164,984     | 43,791,691  | 1 | 1 | 2 | 0 |
| Case 70 | 8  | 46,886,735  | 58,065,790  | 1 | 1 | 2 | 0 |
| Case 70 | 8  | 58,077,248  | 80,032,735  | 2 | 1 | 3 | 0 |
| Case 70 | 8  | 80,045,426  | 90,784,979  | 2 | 2 | 4 | 0 |
| Case 70 | 8  | 90,784,991  | 90,860,838  | 3 | 0 | 3 | 1 |
| Case 70 | 8  | 90,863,793  | 91,081,580  | 1 | 0 | 1 | 0 |
| Case 70 | 8  | 91,082,062  | 91,214,786  | 2 | 1 | 3 | 0 |
| Case 70 | 8  | 91,222,654  | 99,445,122  | 2 | 2 | 4 | 0 |
| Case 70 | 8  | 99,450,646  | 101,104,014 | 2 | 1 | 3 | 0 |
| Case 70 | 8  | 101,104,202 | 128,725,947 | 2 | 2 | 4 | 0 |
| Case 70 | 8  | 128,730,554 | 128,865,471 | 2 | 1 | 3 | 0 |
| Case 70 | 8  | 128,878,635 | 129,082,378 | 2 | 0 | 2 | 1 |
| Case 70 | 8  | 129,083,584 | 146,293,414 | 2 | 2 | 4 | 0 |
| Case 70 | 9  | 46,587      | 5,787,439   | 2 | 0 | 2 | 1 |
| Case 70 | 9  | 5,787,566   | 6,534,845   | 2 | 1 | 3 | 0 |
| Case 70 | 9  | 6,535,057   | 14,833,488  | 2 | 0 | 2 | 1 |
| Case 70 | 9  | 14,834,172  | 14,941,672  | 4 | 0 | 4 | 1 |
| Case 70 | 9  | 14,947,472  | 31,872,624  | 2 | 0 | 2 | 1 |
| Case 70 | 9  | 31,873,011  | 32,120,093  | 4 | 1 | 5 | 0 |
| Case 70 | 9  | 32,121,610  | 32,456,017  | 2 | 2 | 4 | 0 |
| Case 70 | 9  | 32,456,656  | 34,256,618  | 2 | 1 | 3 | 0 |
| Case 70 | 9  | 34,256,634  | 36,952,743  | 2 | 0 | 2 | 1 |
| Case 70 | 9  | 36,956,031  | 38,257,360  | 2 | 1 | 3 | 0 |
| Case 70 | 9  | 38,258,023  | 40,774,091  | 2 | 0 | 2 | 1 |
| Case 70 | 9  | 40,774,167  | 46,944,322  | 2 | 1 | 3 | 0 |
| Case 70 | 9  | 65,629,772  | 93,941,796  | 2 | 1 | 3 | 0 |
| Case 70 | 9  | 93,944,244  | 93,951,043  | 1 | 1 | 2 | 0 |
| Case 70 | 9  | 93,952,940  | 94,153,356  | 7 | 0 | 7 | 1 |
| Case 70 | 9  | 94,153,503  | 94,258,836  | 5 | 1 | 6 | 0 |
| Case 70 | 9  | 94,259,474  | 94,626,543  | 3 | 1 | 4 | 0 |
| Case 70 | 9  | 94,629,592  | 95,375,417  | 2 | 1 | 3 | 0 |
| Case 70 | 9  | 95,378,124  | 98,468,885  | 3 | 1 | 4 | 0 |
| Case 70 | 9  | 98,473,646  | 130,630,342 | 1 | 1 | 2 | 0 |
| Case 70 | 9  | 130,630,632 | 130,863,627 | 2 | 1 | 3 | 0 |
| Case 70 | 9  | 130,864,716 | 141,066,491 | 1 | 1 | 2 | 0 |
| Case 70 | 10 | 98,087      | 39,097,912  | 2 | 1 | 3 | 0 |
| Case 70 | 10 | 42,436,301  | 74,268,031  | 2 | 1 | 3 | 0 |
| Case 70 | 10 | 74,293,891  | 74,884,891  | 1 | 1 | 2 | 0 |
| Case 70 | 10 | 74,884,892  | 105,330,634 | 2 | 1 | 3 | 0 |
| Case 70 | 10 | 105,331,459 | 106,202,531 | 3 | 1 | 4 | 0 |
| Case 70 | 10 | 106,207,209 | 135,477,883 | 2 | 1 | 3 | 0 |
| Case 70 | 11 | 193,146     | 284,636     | 2 | 1 | 3 | 0 |
| Case 70 | 11 | 285,188     | 563,289     | 2 | 2 | 4 | 0 |

|         |    |             |             |   |   |   |   |
|---------|----|-------------|-------------|---|---|---|---|
| Case 70 | 11 | 563,303     | 810,318     | 2 | 1 | 3 | 0 |
| Case 70 | 11 | 810,882     | 1,013,929   | 2 | 2 | 4 | 0 |
| Case 70 | 11 | 1,013,992   | 50,381,750  | 2 | 1 | 3 | 0 |
| Case 70 | 11 | 50,417,549  | 51,591,253  | 2 | 0 | 2 | 1 |
| Case 70 | 11 | 54,794,237  | 55,111,500  | 2 | 0 | 2 | 1 |
| Case 70 | 11 | 55,111,584  | 111,633,570 | 2 | 1 | 3 | 0 |
| Case 70 | 11 | 111,634,255 | 134,934,063 | 2 | 0 | 2 | 1 |
| Case 70 | 12 | 191,619     | 7,045,879   | 1 | 1 | 2 | 0 |
| Case 70 | 12 | 7,046,003   | 7,476,145   | 2 | 1 | 3 | 0 |
| Case 70 | 12 | 7,476,894   | 12,204,205  | 1 | 1 | 2 | 0 |
| Case 70 | 12 | 12,204,745  | 13,380,486  | 2 | 1 | 3 | 0 |
| Case 70 | 12 | 13,385,412  | 24,334,950  | 1 | 1 | 2 | 0 |
| Case 70 | 12 | 24,336,190  | 31,795,208  | 7 | 0 | 7 | 1 |
| Case 70 | 12 | 31,797,795  | 32,124,411  | 5 | 1 | 6 | 0 |
| Case 70 | 12 | 32,128,219  | 32,141,419  | 3 | 1 | 4 | 0 |
| Case 70 | 12 | 32,143,302  | 32,144,856  | 1 | 1 | 2 | 0 |
| Case 70 | 12 | 32,147,712  | 34,853,011  | 7 | 0 | 7 | 1 |
| Case 70 | 12 | 37,876,400  | 54,421,255  | 3 | 1 | 4 | 0 |
| Case 70 | 12 | 54,421,476  | 55,003,931  | 2 | 1 | 3 | 0 |
| Case 70 | 12 | 55,014,152  | 110,300,147 | 3 | 1 | 4 | 0 |
| Case 70 | 12 | 110,306,740 | 113,397,897 | 2 | 1 | 3 | 0 |
| Case 70 | 12 | 113,398,919 | 121,409,898 | 3 | 1 | 4 | 0 |
| Case 70 | 12 | 121,416,045 | 124,422,261 | 3 | 0 | 3 | 1 |
| Case 70 | 12 | 124,422,324 | 124,424,636 | 1 | 1 | 2 | 0 |
| Case 70 | 12 | 124,427,306 | 132,949,947 | 3 | 1 | 4 | 0 |
| Case 70 | 12 | 132,962,509 | 133,810,935 | 2 | 1 | 3 | 0 |
| Case 70 | 13 | 19,058,717  | 64,278,089  | 2 | 1 | 3 | 0 |
| Case 70 | 13 | 64,279,866  | 66,707,106  | 1 | 1 | 2 | 0 |
| Case 70 | 13 | 66,712,732  | 67,249,717  | 2 | 1 | 3 | 0 |
| Case 70 | 13 | 67,249,849  | 115,103,529 | 1 | 1 | 2 | 0 |
| Case 70 | 14 | 19,280,733  | 20,420,338  | 1 | 1 | 2 | 0 |
| Case 70 | 14 | 20,425,051  | 20,651,027  | 2 | 1 | 3 | 0 |
| Case 70 | 14 | 20,651,157  | 22,429,647  | 2 | 2 | 4 | 0 |
| Case 70 | 14 | 22,433,866  | 22,980,408  | 3 | 3 | 6 | 0 |
| Case 70 | 14 | 22,983,223  | 23,312,603  | 2 | 2 | 4 | 0 |
| Case 70 | 14 | 23,312,931  | 25,076,494  | 2 | 1 | 3 | 0 |
| Case 70 | 14 | 25,077,520  | 28,115,542  | 2 | 2 | 4 | 0 |
| Case 70 | 14 | 28,119,601  | 28,141,417  | 2 | 1 | 3 | 0 |
| Case 70 | 14 | 28,149,319  | 28,188,438  | 5 | 2 | 7 | 0 |
| Case 70 | 14 | 28,190,767  | 29,024,101  | 3 | 2 | 5 | 0 |
| Case 70 | 14 | 29,025,356  | 37,385,107  | 2 | 2 | 4 | 0 |
| Case 70 | 14 | 37,387,006  | 38,652,717  | 2 | 1 | 3 | 0 |
| Case 70 | 14 | 38,653,247  | 45,403,699  | 2 | 2 | 4 | 0 |
| Case 70 | 14 | 45,404,328  | 45,693,307  | 2 | 1 | 3 | 0 |
| Case 70 | 14 | 45,693,341  | 51,640,496  | 2 | 2 | 4 | 0 |
| Case 70 | 14 | 51,655,167  | 52,105,814  | 3 | 1 | 4 | 0 |
| Case 70 | 14 | 52,109,999  | 107,287,663 | 2 | 1 | 3 | 0 |
| Case 70 | 15 | 20,034,919  | 55,611,603  | 2 | 0 | 2 | 1 |
| Case 70 | 15 | 55,612,511  | 56,544,917  | 2 | 2 | 4 | 0 |
| Case 70 | 15 | 56,546,212  | 56,582,416  | 2 | 1 | 3 | 0 |
| Case 70 | 15 | 56,603,180  | 59,199,937  | 2 | 0 | 2 | 1 |
| Case 70 | 15 | 59,205,253  | 101,716,583 | 4 | 0 | 4 | 1 |
| Case 70 | 15 | 101,717,599 | 102,461,162 | 3 | 1 | 4 | 0 |
| Case 70 | 16 | 88,165      | 3,299,705   | 2 | 0 | 2 | 1 |
| Case 70 | 16 | 3,299,718   | 3,350,226   | 2 | 1 | 3 | 0 |
| Case 70 | 16 | 3,350,268   | 35,285,582  | 3 | 0 | 3 | 1 |
| Case 70 | 16 | 46,450,037  | 53,100,690  | 3 | 0 | 3 | 1 |
| Case 70 | 16 | 53,114,256  | 54,054,261  | 1 | 0 | 1 | 0 |
| Case 70 | 16 | 54,056,159  | 54,113,607  | 2 | 1 | 3 | 0 |
| Case 70 | 16 | 54,114,529  | 71,107,130  | 3 | 0 | 3 | 1 |
| Case 70 | 16 | 71,113,844  | 79,691,318  | 2 | 0 | 2 | 1 |

|         |    |            |            |   |   |   |   |
|---------|----|------------|------------|---|---|---|---|
| Case 70 | 16 | 79,692,668 | 89,813,093 | 3 | 0 | 3 | 1 |
| Case 70 | 16 | 89,814,188 | 90,274,695 | 2 | 0 | 2 | 1 |
| Case 70 | 17 | 11,885     | 7,094,050  | 2 | 0 | 2 | 1 |
| Case 70 | 17 | 7,096,379  | 7,144,991  | 2 | 1 | 3 | 0 |
| Case 70 | 17 | 7,145,052  | 7,419,824  | 3 | 0 | 3 | 1 |
| Case 70 | 17 | 7,434,079  | 22,242,355 | 2 | 0 | 2 | 1 |
| Case 70 | 17 | 25,268,142 | 25,268,142 | 2 | 0 | 2 | 1 |
| Case 70 | 17 | 25,295,032 | 34,420,079 | 2 | 2 | 4 | 0 |
| Case 70 | 17 | 34,430,336 | 34,436,708 | 2 | 1 | 3 | 0 |
| Case 70 | 17 | 34,443,811 | 34,476,396 | 5 | 2 | 7 | 0 |
| Case 70 | 17 | 34,597,521 | 38,715,102 | 2 | 2 | 4 | 0 |
| Case 70 | 17 | 38,715,186 | 39,525,970 | 2 | 1 | 3 | 0 |
| Case 70 | 17 | 39,527,162 | 39,967,409 | 2 | 2 | 4 | 0 |
| Case 70 | 17 | 39,967,442 | 76,063,855 | 2 | 1 | 3 | 0 |
| Case 70 | 17 | 76,066,209 | 78,169,375 | 3 | 1 | 4 | 0 |
| Case 70 | 17 | 78,170,224 | 78,399,412 | 2 | 1 | 3 | 0 |
| Case 70 | 17 | 78,402,423 | 80,544,993 | 3 | 1 | 4 | 0 |
| Case 70 | 17 | 80,545,076 | 81,060,040 | 3 | 0 | 3 | 1 |
| Case 70 | 18 | 87,505     | 319,935    | 2 | 0 | 2 | 1 |
| Case 70 | 18 | 321,773    | 15,375,878 | 2 | 1 | 3 | 0 |
| Case 70 | 18 | 18,520,354 | 23,590,203 | 2 | 1 | 3 | 0 |
| Case 70 | 18 | 23,595,985 | 26,445,040 | 3 | 1 | 4 | 0 |
| Case 70 | 18 | 26,455,757 | 34,256,593 | 1 | 0 | 1 | 0 |
| Case 70 | 18 | 34,258,129 | 36,016,350 | 1 | 1 | 2 | 0 |
| Case 70 | 18 | 36,017,573 | 36,020,251 | 3 | 1 | 4 | 0 |
| Case 70 | 18 | 36,021,822 | 43,999,423 | 1 | 0 | 1 | 0 |
| Case 70 | 18 | 44,005,342 | 44,053,006 | 2 | 1 | 3 | 0 |
| Case 70 | 18 | 44,057,151 | 47,458,001 | 2 | 0 | 2 | 1 |
| Case 70 | 18 | 47,459,231 | 47,463,734 | 2 | 1 | 3 | 0 |
| Case 70 | 18 | 47,463,735 | 47,466,709 | 3 | 1 | 4 | 0 |
| Case 70 | 18 | 47,470,826 | 72,058,707 | 1 | 0 | 1 | 0 |
| Case 70 | 18 | 72,063,225 | 73,343,418 | 1 | 1 | 2 | 0 |
| Case 70 | 18 | 73,344,179 | 73,356,731 | 3 | 1 | 4 | 0 |
| Case 70 | 18 | 73,360,511 | 76,324,504 | 1 | 0 | 1 | 0 |
| Case 70 | 18 | 76,326,716 | 78,015,180 | 1 | 1 | 2 | 0 |
| Case 70 | 19 | 260,912    | 6,439,487  | 1 | 1 | 2 | 0 |
| Case 70 | 19 | 6,444,299  | 6,467,589  | 3 | 1 | 4 | 0 |
| Case 70 | 19 | 6,467,619  | 9,541,833  | 1 | 0 | 1 | 0 |
| Case 70 | 19 | 9,546,329  | 9,601,155  | 2 | 1 | 3 | 0 |
| Case 70 | 19 | 9,606,461  | 10,108,061 | 3 | 0 | 3 | 1 |
| Case 70 | 19 | 10,108,687 | 10,109,095 | 1 | 1 | 2 | 0 |
| Case 70 | 19 | 10,111,065 | 11,510,371 | 3 | 1 | 4 | 0 |
| Case 70 | 19 | 11,510,740 | 11,837,692 | 2 | 1 | 3 | 0 |
| Case 70 | 19 | 11,839,011 | 12,692,130 | 1 | 1 | 2 | 0 |
| Case 70 | 19 | 12,692,328 | 13,055,615 | 2 | 1 | 3 | 0 |
| Case 70 | 19 | 13,056,557 | 13,705,296 | 3 | 1 | 4 | 0 |
| Case 70 | 19 | 13,710,380 | 13,941,099 | 2 | 1 | 3 | 0 |
| Case 70 | 19 | 13,941,643 | 14,688,725 | 2 | 2 | 4 | 0 |
| Case 70 | 19 | 14,692,790 | 19,447,991 | 2 | 1 | 3 | 0 |
| Case 70 | 19 | 19,457,908 | 19,645,901 | 3 | 0 | 3 | 1 |
| Case 70 | 19 | 19,646,431 | 19,909,052 | 1 | 0 | 1 | 0 |
| Case 70 | 19 | 19,939,387 | 20,116,906 | 2 | 1 | 3 | 0 |
| Case 70 | 19 | 20,117,147 | 22,693,596 | 3 | 0 | 3 | 1 |
| Case 70 | 19 | 22,693,766 | 22,693,766 | 1 | 1 | 2 | 0 |
| Case 70 | 19 | 22,697,721 | 23,392,478 | 3 | 1 | 4 | 0 |
| Case 70 | 19 | 23,395,317 | 24,518,609 | 1 | 0 | 1 | 0 |
| Case 70 | 19 | 24,545,366 | 24,629,285 | 1 | 1 | 2 | 0 |
| Case 70 | 19 | 27,732,159 | 27,801,814 | 1 | 1 | 2 | 0 |
| Case 70 | 19 | 27,828,664 | 28,001,687 | 7 | 0 | 7 | 1 |
| Case 70 | 19 | 28,023,764 | 29,590,703 | 6 | 1 | 7 | 0 |
| Case 70 | 19 | 29,594,192 | 29,594,192 | 3 | 1 | 4 | 0 |

|         |    |            |            |   |   |   |   |
|---------|----|------------|------------|---|---|---|---|
| Case 70 | 19 | 29,599,139 | 29,599,139 | 1 | 1 | 2 | 0 |
| Case 70 | 19 | 29,599,586 | 30,058,810 | 7 | 0 | 7 | 1 |
| Case 70 | 19 | 30,064,396 | 30,861,683 | 6 | 1 | 7 | 0 |
| Case 70 | 19 | 30,877,813 | 34,791,496 | 3 | 2 | 5 | 0 |
| Case 70 | 19 | 34,791,556 | 34,858,801 | 2 | 2 | 4 | 0 |
| Case 70 | 19 | 34,859,522 | 35,449,773 | 2 | 1 | 3 | 0 |
| Case 70 | 19 | 35,449,809 | 36,964,376 | 2 | 2 | 4 | 0 |
| Case 70 | 19 | 36,965,076 | 37,907,792 | 6 | 1 | 7 | 0 |
| Case 70 | 19 | 37,909,470 | 37,975,803 | 3 | 1 | 4 | 0 |
| Case 70 | 19 | 37,975,850 | 40,712,030 | 2 | 2 | 4 | 0 |
| Case 70 | 19 | 40,715,058 | 41,235,134 | 3 | 0 | 3 | 1 |
| Case 70 | 19 | 41,239,223 | 41,243,601 | 1 | 1 | 2 | 0 |
| Case 70 | 19 | 41,244,887 | 42,584,014 | 3 | 1 | 4 | 0 |
| Case 70 | 19 | 42,584,056 | 45,322,959 | 3 | 0 | 3 | 1 |
| Case 70 | 19 | 45,322,962 | 45,322,962 | 1 | 1 | 2 | 0 |
| Case 70 | 19 | 45,323,964 | 45,323,987 | 3 | 0 | 3 | 1 |
| Case 70 | 19 | 45,324,516 | 45,561,012 | 3 | 1 | 4 | 0 |
| Case 70 | 19 | 45,561,063 | 46,307,979 | 2 | 1 | 3 | 0 |
| Case 70 | 19 | 46,308,217 | 47,397,495 | 3 | 1 | 4 | 0 |
| Case 70 | 19 | 47,412,622 | 52,442,262 | 3 | 0 | 3 | 1 |
| Case 70 | 19 | 52,443,490 | 53,746,938 | 2 | 0 | 2 | 1 |
| Case 70 | 19 | 53,747,000 | 53,751,217 | 2 | 1 | 3 | 0 |
| Case 70 | 19 | 53,754,736 | 57,828,099 | 3 | 0 | 3 | 1 |
| Case 70 | 19 | 57,828,476 | 58,153,577 | 1 | 1 | 2 | 0 |
| Case 70 | 19 | 58,153,596 | 58,153,596 | 2 | 1 | 3 | 0 |
| Case 70 | 19 | 58,153,656 | 59,097,160 | 3 | 0 | 3 | 1 |
| Case 70 | 20 | 63,244     | 377,226    | 2 | 1 | 3 | 0 |
| Case 70 | 20 | 377,258    | 896,590    | 2 | 2 | 4 | 0 |
| Case 70 | 20 | 896,658    | 1,468,516  | 2 | 1 | 3 | 0 |
| Case 70 | 20 | 1,470,343  | 2,084,187  | 2 | 2 | 4 | 0 |
| Case 70 | 20 | 2,088,698  | 3,605,542  | 2 | 1 | 3 | 0 |
| Case 70 | 20 | 3,609,961  | 4,680,378  | 2 | 2 | 4 | 0 |
| Case 70 | 20 | 4,680,489  | 5,597,276  | 2 | 1 | 3 | 0 |
| Case 70 | 20 | 5,610,737  | 14,548,676 | 2 | 2 | 4 | 0 |
| Case 70 | 20 | 14,550,380 | 15,462,611 | 2 | 1 | 3 | 0 |
| Case 70 | 20 | 15,467,075 | 16,654,155 | 2 | 2 | 4 | 0 |
| Case 70 | 20 | 16,655,964 | 17,442,455 | 2 | 1 | 3 | 0 |
| Case 70 | 20 | 17,443,362 | 17,885,751 | 2 | 2 | 4 | 0 |
| Case 70 | 20 | 17,886,838 | 18,982,052 | 2 | 1 | 3 | 0 |
| Case 70 | 20 | 18,982,122 | 21,451,139 | 2 | 2 | 4 | 0 |
| Case 70 | 20 | 21,451,491 | 26,293,985 | 2 | 1 | 3 | 0 |
| Case 70 | 20 | 29,425,357 | 36,258,061 | 2 | 1 | 3 | 0 |
| Case 70 | 20 | 36,258,520 | 36,869,100 | 2 | 2 | 4 | 0 |
| Case 70 | 20 | 36,869,101 | 37,657,129 | 2 | 1 | 3 | 0 |
| Case 70 | 20 | 37,659,385 | 38,563,245 | 2 | 2 | 4 | 0 |
| Case 70 | 20 | 38,566,077 | 39,268,516 | 2 | 1 | 3 | 0 |
| Case 70 | 20 | 39,273,369 | 39,592,520 | 2 | 2 | 4 | 0 |
| Case 70 | 20 | 39,594,960 | 41,176,364 | 2 | 1 | 3 | 0 |
| Case 70 | 20 | 41,176,570 | 43,041,591 | 2 | 2 | 4 | 0 |
| Case 70 | 20 | 43,042,364 | 45,216,744 | 2 | 1 | 3 | 0 |
| Case 70 | 20 | 45,217,841 | 47,341,312 | 2 | 2 | 4 | 0 |
| Case 70 | 20 | 47,342,814 | 48,481,278 | 2 | 1 | 3 | 0 |
| Case 70 | 20 | 48,481,304 | 49,354,499 | 2 | 2 | 4 | 0 |
| Case 70 | 20 | 49,354,598 | 49,624,145 | 2 | 1 | 3 | 0 |
| Case 70 | 20 | 49,625,623 | 51,797,353 | 2 | 2 | 4 | 0 |
| Case 70 | 20 | 51,799,439 | 52,274,008 | 2 | 1 | 3 | 0 |
| Case 70 | 20 | 52,275,163 | 59,954,382 | 2 | 2 | 4 | 0 |
| Case 70 | 20 | 59,955,785 | 62,948,788 | 2 | 1 | 3 | 0 |
| Case 70 | 21 | 10,827,533 | 10,971,337 | 3 | 0 | 3 | 1 |
| Case 70 | 21 | 14,368,320 | 36,193,871 | 3 | 0 | 3 | 1 |
| Case 70 | 21 | 36,202,482 | 36,274,176 | 1 | 1 | 2 | 0 |

|         |    |             |             |   |   |   |   |
|---------|----|-------------|-------------|---|---|---|---|
| Case 70 | 21 | 36,274,619  | 36,363,560  | 7 | 0 | 7 | 1 |
| Case 70 | 21 | 36,364,162  | 36,845,673  | 6 | 1 | 7 | 0 |
| Case 70 | 21 | 36,851,619  | 36,865,734  | 3 | 1 | 4 | 0 |
| Case 70 | 21 | 36,873,163  | 41,725,503  | 3 | 0 | 3 | 1 |
| Case 70 | 21 | 41,725,625  | 42,729,035  | 1 | 0 | 1 | 0 |
| Case 70 | 21 | 42,729,117  | 44,277,414  | 1 | 1 | 2 | 0 |
| Case 70 | 21 | 44,279,410  | 46,868,829  | 2 | 0 | 2 | 1 |
| Case 70 | 21 | 46,871,472  | 46,888,290  | 2 | 1 | 3 | 0 |
| Case 70 | 21 | 46,888,344  | 46,893,848  | 3 | 0 | 3 | 1 |
| Case 70 | 21 | 46,895,394  | 48,100,155  | 1 | 0 | 1 | 0 |
| Case 70 | 22 | 16,114,244  | 51,195,728  | 1 | 1 | 2 | 0 |
| Case 71 | 1  | 82,154      | 1,222,267   | 1 | 1 | 2 | 0 |
| Case 71 | 1  | 1,222,279   | 1,277,091   | 1 | 0 | 1 | 0 |
| Case 71 | 1  | 1,277,119   | 120,091,434 | 1 | 1 | 2 | 0 |
| Case 71 | 1  | 120,099,044 | 120,150,949 | 5 | 0 | 5 | 1 |
| Case 71 | 1  | 120,152,082 | 121,346,616 | 1 | 1 | 2 | 0 |
| Case 71 | 1  | 142,649,718 | 249,218,992 | 1 | 1 | 2 | 0 |
| Case 71 | 2  | 18,674      | 9,953,949   | 1 | 1 | 2 | 0 |
| Case 71 | 2  | 9,954,768   | 10,145,348  | 1 | 0 | 1 | 0 |
| Case 71 | 2  | 10,156,725  | 92,081,640  | 1 | 1 | 2 | 0 |
| Case 71 | 2  | 95,429,424  | 243,048,760 | 1 | 1 | 2 | 0 |
| Case 71 | 3  | 61,495      | 90,442,925  | 1 | 1 | 2 | 0 |
| Case 71 | 3  | 93,537,290  | 115,440,430 | 1 | 1 | 2 | 0 |
| Case 71 | 3  | 115,441,608 | 121,412,892 | 2 | 1 | 3 | 0 |
| Case 71 | 3  | 121,413,176 | 121,647,286 | 1 | 1 | 2 | 0 |
| Case 71 | 3  | 121,647,962 | 173,317,852 | 2 | 1 | 3 | 0 |
| Case 71 | 3  | 173,322,076 | 174,939,222 | 1 | 1 | 2 | 0 |
| Case 71 | 3  | 174,940,266 | 192,019,370 | 2 | 0 | 2 | 1 |
| Case 71 | 3  | 192,020,055 | 197,838,262 | 3 | 0 | 3 | 1 |
| Case 71 | 4  | 71,566      | 8,872,977   | 1 | 1 | 2 | 0 |
| Case 71 | 4  | 9,371,116   | 9,485,300   | 6 | 1 | 7 | 0 |
| Case 71 | 4  | 9,509,791   | 49,620,898  | 1 | 1 | 2 | 0 |
| Case 71 | 4  | 52,697,856  | 190,963,766 | 1 | 1 | 2 | 0 |
| Case 71 | 5  | 38,139      | 46,399,093  | 1 | 1 | 2 | 0 |
| Case 71 | 5  | 49,457,282  | 180,693,127 | 1 | 1 | 2 | 0 |
| Case 71 | 6  | 108,666     | 31,238,259  | 1 | 1 | 2 | 0 |
| Case 71 | 6  | 31,239,417  | 31,336,349  | 2 | 0 | 2 | 1 |
| Case 71 | 6  | 31,336,568  | 32,233,547  | 1 | 1 | 2 | 0 |
| Case 71 | 6  | 32,233,568  | 32,685,685  | 1 | 0 | 1 | 0 |
| Case 71 | 6  | 32,685,865  | 58,752,089  | 1 | 1 | 2 | 0 |
| Case 71 | 6  | 61,891,118  | 170,980,171 | 1 | 1 | 2 | 0 |
| Case 71 | 7  | 44,935      | 58,019,061  | 1 | 1 | 2 | 0 |
| Case 71 | 7  | 61,056,053  | 159,119,486 | 1 | 1 | 2 | 0 |
| Case 71 | 8  | 164,984     | 1,107,201   | 1 | 1 | 2 | 0 |
| Case 71 | 8  | 1,108,571   | 1,537,126   | 2 | 1 | 3 | 0 |
| Case 71 | 8  | 1,548,389   | 2,683,929   | 1 | 1 | 2 | 0 |
| Case 71 | 8  | 2,685,370   | 2,776,401   | 2 | 1 | 3 | 0 |
| Case 71 | 8  | 2,777,465   | 3,275,113   | 1 | 1 | 2 | 0 |
| Case 71 | 8  | 3,276,592   | 3,644,651   | 2 | 1 | 3 | 0 |
| Case 71 | 8  | 3,644,685   | 3,828,138   | 1 | 1 | 2 | 0 |
| Case 71 | 8  | 3,828,692   | 3,950,542   | 2 | 1 | 3 | 0 |
| Case 71 | 8  | 3,951,689   | 5,809,543   | 1 | 1 | 2 | 0 |
| Case 71 | 8  | 5,810,703   | 6,184,017   | 2 | 1 | 3 | 0 |
| Case 71 | 8  | 6,184,254   | 8,266,397   | 1 | 1 | 2 | 0 |
| Case 71 | 8  | 8,267,096   | 8,747,926   | 2 | 1 | 3 | 0 |
| Case 71 | 8  | 8,748,032   | 13,947,515  | 1 | 1 | 2 | 0 |
| Case 71 | 8  | 13,948,092  | 14,489,024  | 2 | 1 | 3 | 0 |
| Case 71 | 8  | 14,492,121  | 17,363,239  | 1 | 1 | 2 | 0 |
| Case 71 | 8  | 17,363,941  | 17,612,151  | 2 | 1 | 3 | 0 |
| Case 71 | 8  | 17,612,318  | 34,700,530  | 1 | 1 | 2 | 0 |
| Case 71 | 8  | 34,709,121  | 36,603,228  | 2 | 1 | 3 | 0 |

|         |    |             |             |   |   |   |   |
|---------|----|-------------|-------------|---|---|---|---|
| Case 71 | 8  | 36,603,585  | 39,836,662  | 1 | 1 | 2 | 0 |
| Case 71 | 8  | 39,839,745  | 40,467,685  | 2 | 1 | 3 | 0 |
| Case 71 | 8  | 40,478,096  | 43,791,691  | 1 | 1 | 2 | 0 |
| Case 71 | 8  | 46,886,735  | 69,893,813  | 1 | 1 | 2 | 0 |
| Case 71 | 8  | 69,894,554  | 70,504,309  | 2 | 1 | 3 | 0 |
| Case 71 | 8  | 70,505,272  | 106,654,054 | 1 | 1 | 2 | 0 |
| Case 71 | 8  | 106,663,315 | 108,218,786 | 2 | 1 | 3 | 0 |
| Case 71 | 8  | 108,224,765 | 127,586,371 | 1 | 1 | 2 | 0 |
| Case 71 | 8  | 127,592,581 | 129,473,012 | 2 | 1 | 3 | 0 |
| Case 71 | 8  | 129,475,551 | 132,415,409 | 1 | 1 | 2 | 0 |
| Case 71 | 8  | 132,424,978 | 133,404,409 | 2 | 1 | 3 | 0 |
| Case 71 | 8  | 133,405,459 | 136,770,587 | 1 | 1 | 2 | 0 |
| Case 71 | 8  | 136,770,869 | 137,428,405 | 2 | 1 | 3 | 0 |
| Case 71 | 8  | 137,430,757 | 139,173,342 | 1 | 1 | 2 | 0 |
| Case 71 | 8  | 139,175,182 | 140,190,193 | 2 | 1 | 3 | 0 |
| Case 71 | 8  | 140,200,107 | 146,293,414 | 1 | 1 | 2 | 0 |
| Case 71 | 9  | 46,587      | 46,944,322  | 1 | 1 | 2 | 0 |
| Case 71 | 9  | 65,629,772  | 140,007,817 | 1 | 1 | 2 | 0 |
| Case 71 | 9  | 140,007,869 | 140,349,707 | 1 | 0 | 1 | 0 |
| Case 71 | 9  | 140,350,937 | 141,066,491 | 1 | 1 | 2 | 0 |
| Case 71 | 10 | 98,087      | 39,097,912  | 1 | 1 | 2 | 0 |
| Case 71 | 10 | 42,436,301  | 135,477,883 | 1 | 1 | 2 | 0 |
| Case 71 | 11 | 193,146     | 51,591,253  | 1 | 1 | 2 | 0 |
| Case 71 | 11 | 54,794,237  | 134,934,063 | 1 | 1 | 2 | 0 |
| Case 71 | 12 | 191,619     | 34,853,011  | 1 | 1 | 2 | 0 |
| Case 71 | 12 | 37,876,400  | 133,810,935 | 1 | 1 | 2 | 0 |
| Case 71 | 13 | 19,058,717  | 114,937,618 | 1 | 1 | 2 | 0 |
| Case 71 | 13 | 114,939,396 | 115,103,529 | 1 | 0 | 1 | 0 |
| Case 71 | 14 | 19,280,733  | 20,249,407  | 1 | 1 | 2 | 0 |
| Case 71 | 14 | 20,263,425  | 20,425,051  | 4 | 0 | 4 | 1 |
| Case 71 | 14 | 20,426,742  | 22,595,277  | 1 | 1 | 2 | 0 |
| Case 71 | 14 | 22,597,335  | 22,903,931  | 2 | 1 | 3 | 0 |
| Case 71 | 14 | 22,913,994  | 107,287,663 | 1 | 1 | 2 | 0 |
| Case 71 | 15 | 20,034,919  | 102,461,162 | 1 | 1 | 2 | 0 |
| Case 71 | 16 | 88,165      | 591,586     | 1 | 1 | 2 | 0 |
| Case 71 | 16 | 593,277     | 847,388     | 1 | 0 | 1 | 0 |
| Case 71 | 16 | 847,597     | 35,285,582  | 1 | 1 | 2 | 0 |
| Case 71 | 16 | 46,450,037  | 90,274,695  | 1 | 1 | 2 | 0 |
| Case 71 | 17 | 11,885      | 22,242,355  | 1 | 1 | 2 | 0 |
| Case 71 | 17 | 25,268,142  | 34,436,708  | 1 | 1 | 2 | 0 |
| Case 71 | 17 | 34,443,811  | 34,597,521  | 5 | 0 | 5 | 1 |
| Case 71 | 17 | 34,815,551  | 81,060,040  | 1 | 1 | 2 | 0 |
| Case 71 | 18 | 87,505      | 15,375,878  | 1 | 1 | 2 | 0 |
| Case 71 | 18 | 18,520,354  | 78,015,180  | 1 | 1 | 2 | 0 |
| Case 71 | 19 | 260,912     | 11,819,193  | 1 | 1 | 2 | 0 |
| Case 71 | 19 | 11,828,410  | 12,637,322  | 1 | 0 | 1 | 0 |
| Case 71 | 19 | 12,637,384  | 20,211,540  | 1 | 1 | 2 | 0 |
| Case 71 | 19 | 20,218,177  | 22,425,589  | 1 | 0 | 1 | 0 |
| Case 71 | 19 | 22,425,615  | 24,629,285  | 1 | 1 | 2 | 0 |
| Case 71 | 19 | 27,732,159  | 59,097,160  | 1 | 1 | 2 | 0 |
| Case 71 | 20 | 63,244      | 26,293,985  | 1 | 1 | 2 | 0 |
| Case 71 | 20 | 29,425,357  | 60,881,330  | 1 | 1 | 2 | 0 |
| Case 71 | 20 | 60,881,736  | 60,927,412  | 1 | 0 | 1 | 0 |
| Case 71 | 20 | 60,928,231  | 62,028,308  | 1 | 1 | 2 | 0 |
| Case 71 | 20 | 62,029,711  | 62,196,853  | 1 | 0 | 1 | 0 |
| Case 71 | 20 | 62,196,934  | 62,948,788  | 1 | 1 | 2 | 0 |
| Case 71 | 21 | 10,827,533  | 10,971,337  | 1 | 1 | 2 | 0 |
| Case 71 | 21 | 14,368,320  | 24,720,653  | 1 | 1 | 2 | 0 |
| Case 71 | 21 | 24,726,646  | 25,154,599  | 1 | 0 | 1 | 0 |
| Case 71 | 21 | 25,156,297  | 48,100,155  | 1 | 1 | 2 | 0 |
| Case 71 | 22 | 16,114,244  | 51,195,728  | 1 | 1 | 2 | 0 |

|         |   |            |            |   |   |   |   |
|---------|---|------------|------------|---|---|---|---|
| Case 73 | 1 | 82,154     | 838,555    | 3 | 1 | 4 | 0 |
| Case 73 | 1 | 846,808    | 908,944    | 2 | 0 | 2 | 1 |
| Case 73 | 1 | 909,006    | 909,888    | 1 | 0 | 1 | 0 |
| Case 73 | 1 | 918,384    | 1,222,895  | 2 | 0 | 2 | 1 |
| Case 73 | 1 | 1,222,958  | 1,226,912  | 1 | 0 | 1 | 0 |
| Case 73 | 1 | 1,227,897  | 6,610,486  | 2 | 0 | 2 | 1 |
| Case 73 | 1 | 6,614,230  | 6,615,469  | 1 | 0 | 1 | 0 |
| Case 73 | 1 | 6,620,545  | 9,801,233  | 2 | 0 | 2 | 1 |
| Case 73 | 1 | 9,801,341  | 9,833,335  | 3 | 0 | 3 | 1 |
| Case 73 | 1 | 9,833,451  | 11,008,341 | 2 | 0 | 2 | 1 |
| Case 73 | 1 | 11,008,406 | 11,008,762 | 1 | 0 | 1 | 0 |
| Case 73 | 1 | 11,008,778 | 18,073,505 | 2 | 0 | 2 | 1 |
| Case 73 | 1 | 18,074,702 | 21,011,510 | 3 | 0 | 3 | 1 |
| Case 73 | 1 | 21,012,549 | 21,106,855 | 2 | 0 | 2 | 1 |
| Case 73 | 1 | 21,111,887 | 22,000,026 | 3 | 0 | 3 | 1 |
| Case 73 | 1 | 22,001,981 | 22,211,623 | 2 | 0 | 2 | 1 |
| Case 73 | 1 | 22,211,941 | 24,148,365 | 3 | 0 | 3 | 1 |
| Case 73 | 1 | 24,149,315 | 24,201,911 | 2 | 0 | 2 | 1 |
| Case 73 | 1 | 24,201,920 | 24,431,956 | 3 | 0 | 3 | 1 |
| Case 73 | 1 | 24,432,519 | 24,447,716 | 2 | 0 | 2 | 1 |
| Case 73 | 1 | 24,447,801 | 27,238,451 | 3 | 0 | 3 | 1 |
| Case 73 | 1 | 27,238,544 | 27,713,733 | 2 | 0 | 2 | 1 |
| Case 73 | 1 | 27,714,702 | 29,252,322 | 3 | 0 | 3 | 1 |
| Case 73 | 1 | 29,268,716 | 29,385,350 | 2 | 0 | 2 | 1 |
| Case 73 | 1 | 29,391,585 | 31,408,056 | 3 | 0 | 3 | 1 |
| Case 73 | 1 | 31,413,972 | 34,044,616 | 2 | 0 | 2 | 1 |
| Case 73 | 1 | 34,046,066 | 35,379,493 | 3 | 0 | 3 | 1 |
| Case 73 | 1 | 35,381,295 | 36,945,037 | 2 | 0 | 2 | 1 |
| Case 73 | 1 | 36,945,559 | 37,335,085 | 3 | 0 | 3 | 1 |
| Case 73 | 1 | 37,337,725 | 38,522,221 | 2 | 0 | 2 | 1 |
| Case 73 | 1 | 38,527,331 | 38,750,228 | 3 | 0 | 3 | 1 |
| Case 73 | 1 | 38,752,476 | 40,105,285 | 2 | 0 | 2 | 1 |
| Case 73 | 1 | 40,106,095 | 40,268,368 | 3 | 0 | 3 | 1 |
| Case 73 | 1 | 40,275,071 | 41,088,577 | 2 | 0 | 2 | 1 |
| Case 73 | 1 | 41,088,676 | 41,295,542 | 3 | 0 | 3 | 1 |
| Case 73 | 1 | 41,296,788 | 41,343,608 | 2 | 0 | 2 | 1 |
| Case 73 | 1 | 41,346,428 | 41,395,072 | 3 | 0 | 3 | 1 |
| Case 73 | 1 | 41,395,698 | 41,978,849 | 2 | 0 | 2 | 1 |
| Case 73 | 1 | 41,978,890 | 42,083,369 | 3 | 0 | 3 | 1 |
| Case 73 | 1 | 42,085,397 | 42,271,163 | 2 | 0 | 2 | 1 |
| Case 73 | 1 | 42,273,653 | 42,629,099 | 3 | 0 | 3 | 1 |
| Case 73 | 1 | 42,629,176 | 43,102,987 | 2 | 0 | 2 | 1 |
| Case 73 | 1 | 43,104,952 | 43,536,477 | 3 | 0 | 3 | 1 |
| Case 73 | 1 | 43,543,617 | 43,774,437 | 2 | 0 | 2 | 1 |
| Case 73 | 1 | 43,775,103 | 44,446,937 | 3 | 0 | 3 | 1 |
| Case 73 | 1 | 44,447,064 | 44,463,309 | 2 | 0 | 2 | 1 |
| Case 73 | 1 | 44,463,398 | 45,161,845 | 3 | 0 | 3 | 1 |
| Case 73 | 1 | 45,162,818 | 45,804,050 | 2 | 0 | 2 | 1 |
| Case 73 | 1 | 45,806,750 | 46,159,395 | 3 | 0 | 3 | 1 |
| Case 73 | 1 | 46,160,124 | 46,806,480 | 2 | 0 | 2 | 1 |
| Case 73 | 1 | 46,807,597 | 46,954,587 | 3 | 0 | 3 | 1 |
| Case 73 | 1 | 46,964,305 | 46,978,497 | 2 | 0 | 2 | 1 |
| Case 73 | 1 | 46,978,885 | 47,501,728 | 3 | 0 | 3 | 1 |
| Case 73 | 1 | 47,501,822 | 47,919,420 | 2 | 0 | 2 | 1 |
| Case 73 | 1 | 47,924,275 | 48,380,390 | 3 | 0 | 3 | 1 |
| Case 73 | 1 | 48,385,447 | 48,992,947 | 2 | 0 | 2 | 1 |
| Case 73 | 1 | 48,993,335 | 49,210,570 | 3 | 0 | 3 | 1 |
| Case 73 | 1 | 49,213,647 | 50,620,945 | 2 | 0 | 2 | 1 |
| Case 73 | 1 | 50,638,034 | 50,945,526 | 3 | 0 | 3 | 1 |
| Case 73 | 1 | 50,966,897 | 53,008,039 | 2 | 0 | 2 | 1 |
| Case 73 | 1 | 53,015,839 | 53,185,631 | 3 | 0 | 3 | 1 |

|         |   |            |            |   |   |   |   |
|---------|---|------------|------------|---|---|---|---|
| Case 73 | 1 | 53,192,187 | 53,554,406 | 2 | 0 | 2 | 1 |
| Case 73 | 1 | 53,554,565 | 53,666,456 | 3 | 0 | 3 | 1 |
| Case 73 | 1 | 53,666,965 | 53,748,286 | 2 | 0 | 2 | 1 |
| Case 73 | 1 | 53,751,610 | 54,045,180 | 3 | 0 | 3 | 1 |
| Case 73 | 1 | 54,046,556 | 54,303,892 | 2 | 0 | 2 | 1 |
| Case 73 | 1 | 54,310,719 | 54,487,417 | 3 | 0 | 3 | 1 |
| Case 73 | 1 | 54,494,702 | 54,615,337 | 2 | 0 | 2 | 1 |
| Case 73 | 1 | 54,615,558 | 55,608,005 | 3 | 0 | 3 | 1 |
| Case 73 | 1 | 55,613,326 | 55,940,340 | 2 | 0 | 2 | 1 |
| Case 73 | 1 | 55,944,537 | 56,499,478 | 3 | 0 | 3 | 1 |
| Case 73 | 1 | 56,502,227 | 56,744,527 | 2 | 0 | 2 | 1 |
| Case 73 | 1 | 56,745,004 | 57,036,017 | 3 | 0 | 3 | 1 |
| Case 73 | 1 | 57,038,322 | 57,383,358 | 2 | 0 | 2 | 1 |
| Case 73 | 1 | 57,383,376 | 58,050,139 | 3 | 0 | 3 | 1 |
| Case 73 | 1 | 58,051,166 | 58,303,993 | 2 | 0 | 2 | 1 |
| Case 73 | 1 | 58,305,551 | 58,949,987 | 3 | 0 | 3 | 1 |
| Case 73 | 1 | 58,971,748 | 59,157,753 | 2 | 0 | 2 | 1 |
| Case 73 | 1 | 59,162,148 | 60,275,095 | 3 | 0 | 3 | 1 |
| Case 73 | 1 | 60,278,616 | 60,338,776 | 2 | 0 | 2 | 1 |
| Case 73 | 1 | 60,349,843 | 60,503,756 | 3 | 0 | 3 | 1 |
| Case 73 | 1 | 60,503,762 | 60,575,925 | 2 | 0 | 2 | 1 |
| Case 73 | 1 | 60,577,184 | 60,585,522 | 0 | 0 | 0 | 0 |
| Case 73 | 1 | 60,589,775 | 61,483,042 | 3 | 0 | 3 | 1 |
| Case 73 | 1 | 61,484,997 | 61,725,652 | 2 | 0 | 2 | 1 |
| Case 73 | 1 | 61,728,597 | 62,102,307 | 3 | 0 | 3 | 1 |
| Case 73 | 1 | 62,103,021 | 62,675,667 | 2 | 0 | 2 | 1 |
| Case 73 | 1 | 62,675,673 | 62,856,695 | 3 | 0 | 3 | 1 |
| Case 73 | 1 | 62,866,390 | 63,336,271 | 2 | 0 | 2 | 1 |
| Case 73 | 1 | 63,346,976 | 63,837,888 | 3 | 0 | 3 | 1 |
| Case 73 | 1 | 63,842,972 | 64,089,400 | 2 | 0 | 2 | 1 |
| Case 73 | 1 | 64,089,432 | 64,990,577 | 3 | 0 | 3 | 1 |
| Case 73 | 1 | 64,992,561 | 65,073,389 | 2 | 0 | 2 | 1 |
| Case 73 | 1 | 65,074,235 | 65,765,184 | 3 | 0 | 3 | 1 |
| Case 73 | 1 | 65,772,315 | 67,916,910 | 2 | 0 | 2 | 1 |
| Case 73 | 1 | 67,917,914 | 68,358,177 | 3 | 0 | 3 | 1 |
| Case 73 | 1 | 68,364,218 | 68,591,104 | 2 | 0 | 2 | 1 |
| Case 73 | 1 | 68,591,173 | 68,634,144 | 3 | 0 | 3 | 1 |
| Case 73 | 1 | 68,634,196 | 76,585,643 | 2 | 0 | 2 | 1 |
| Case 73 | 1 | 76,586,272 | 76,626,260 | 3 | 0 | 3 | 1 |
| Case 73 | 1 | 76,626,550 | 78,632,090 | 2 | 0 | 2 | 1 |
| Case 73 | 1 | 78,633,857 | 78,766,380 | 3 | 0 | 3 | 1 |
| Case 73 | 1 | 78,772,046 | 84,485,512 | 2 | 0 | 2 | 1 |
| Case 73 | 1 | 84,485,716 | 86,095,613 | 3 | 0 | 3 | 1 |
| Case 73 | 1 | 86,100,264 | 87,628,834 | 2 | 0 | 2 | 1 |
| Case 73 | 1 | 87,628,868 | 87,805,743 | 3 | 0 | 3 | 1 |
| Case 73 | 1 | 87,807,876 | 89,982,719 | 2 | 0 | 2 | 1 |
| Case 73 | 1 | 89,983,184 | 90,179,529 | 3 | 0 | 3 | 1 |
| Case 73 | 1 | 90,179,532 | 90,537,317 | 2 | 0 | 2 | 1 |
| Case 73 | 1 | 90,538,025 | 90,819,317 | 3 | 0 | 3 | 1 |
| Case 73 | 1 | 90,819,447 | 91,178,036 | 2 | 0 | 2 | 1 |
| Case 73 | 1 | 91,179,699 | 91,364,568 | 3 | 0 | 3 | 1 |
| Case 73 | 1 | 91,380,305 | 91,550,896 | 2 | 0 | 2 | 1 |
| Case 73 | 1 | 91,556,690 | 91,658,368 | 3 | 0 | 3 | 1 |
| Case 73 | 1 | 91,658,920 | 92,161,307 | 2 | 0 | 2 | 1 |
| Case 73 | 1 | 92,161,991 | 92,214,628 | 3 | 0 | 3 | 1 |
| Case 73 | 1 | 92,215,089 | 94,473,846 | 2 | 0 | 2 | 1 |
| Case 73 | 1 | 94,473,896 | 94,640,030 | 3 | 0 | 3 | 1 |
| Case 73 | 1 | 94,640,188 | 95,290,064 | 2 | 0 | 2 | 1 |
| Case 73 | 1 | 95,294,047 | 95,421,315 | 3 | 0 | 3 | 1 |
| Case 73 | 1 | 95,421,821 | 95,515,637 | 2 | 0 | 2 | 1 |
| Case 73 | 1 | 95,524,503 | 95,603,092 | 3 | 0 | 3 | 1 |



|         |   |             |             |   |   |   |   |
|---------|---|-------------|-------------|---|---|---|---|
| Case 73 | 1 | 95,609,563  | 95,805,002  | 2 | 0 | 2 | 1 |
| Case 73 | 1 | 95,810,750  | 96,118,307  | 3 | 0 | 3 | 1 |
| Case 73 | 1 | 96,119,408  | 108,421,058 | 2 | 0 | 2 | 1 |
| Case 73 | 1 | 108,425,055 | 109,271,364 | 3 | 0 | 3 | 1 |
| Case 73 | 1 | 109,271,428 | 109,363,242 | 2 | 0 | 2 | 1 |
| Case 73 | 1 | 109,365,991 | 109,397,229 | 3 | 0 | 3 | 1 |
| Case 73 | 1 | 109,399,543 | 109,749,071 | 2 | 0 | 2 | 1 |
| Case 73 | 1 | 109,752,204 | 109,794,785 | 3 | 0 | 3 | 1 |
| Case 73 | 1 | 109,794,992 | 109,832,283 | 2 | 0 | 2 | 1 |
| Case 73 | 1 | 109,834,938 | 110,026,628 | 3 | 0 | 3 | 1 |
| Case 73 | 1 | 110,029,129 | 110,366,083 | 2 | 0 | 2 | 1 |
| Case 73 | 1 | 110,366,310 | 110,871,061 | 3 | 0 | 3 | 1 |
| Case 73 | 1 | 110,882,052 | 110,936,557 | 2 | 0 | 2 | 1 |
| Case 73 | 1 | 110,946,580 | 111,171,378 | 3 | 0 | 3 | 1 |
| Case 73 | 1 | 111,171,407 | 111,237,685 | 2 | 0 | 2 | 1 |
| Case 73 | 1 | 111,250,018 | 111,296,652 | 3 | 0 | 3 | 1 |
| Case 73 | 1 | 111,301,623 | 111,740,942 | 2 | 0 | 2 | 1 |
| Case 73 | 1 | 111,741,349 | 111,957,245 | 3 | 0 | 3 | 1 |
| Case 73 | 1 | 111,957,311 | 111,957,721 | 2 | 0 | 2 | 1 |
| Case 73 | 1 | 111,957,729 | 112,135,958 | 3 | 0 | 3 | 1 |
| Case 73 | 1 | 112,138,656 | 112,315,450 | 2 | 0 | 2 | 1 |
| Case 73 | 1 | 112,319,712 | 112,918,545 | 3 | 0 | 3 | 1 |
| Case 73 | 1 | 112,920,252 | 113,789,136 | 2 | 0 | 2 | 1 |
| Case 73 | 1 | 113,791,338 | 114,085,723 | 3 | 0 | 3 | 1 |
| Case 73 | 1 | 114,088,416 | 114,433,659 | 2 | 0 | 2 | 1 |
| Case 73 | 1 | 114,436,482 | 114,790,954 | 3 | 0 | 3 | 1 |
| Case 73 | 1 | 114,795,885 | 115,642,847 | 2 | 0 | 2 | 1 |
| Case 73 | 1 | 115,645,831 | 115,862,568 | 3 | 0 | 3 | 1 |
| Case 73 | 1 | 115,863,900 | 116,137,190 | 2 | 0 | 2 | 1 |
| Case 73 | 1 | 116,137,912 | 116,334,813 | 3 | 0 | 3 | 1 |
| Case 73 | 1 | 116,336,876 | 116,674,418 | 2 | 0 | 2 | 1 |
| Case 73 | 1 | 116,675,885 | 117,582,373 | 3 | 0 | 3 | 1 |
| Case 73 | 1 | 117,594,464 | 117,753,528 | 2 | 0 | 2 | 1 |
| Case 73 | 1 | 117,756,019 | 118,384,261 | 3 | 0 | 3 | 1 |
| Case 73 | 1 | 118,406,208 | 119,300,747 | 2 | 0 | 2 | 1 |
| Case 73 | 1 | 119,300,941 | 119,589,343 | 3 | 0 | 3 | 1 |
| Case 73 | 1 | 119,593,268 | 119,909,208 | 2 | 0 | 2 | 1 |
| Case 73 | 1 | 119,909,514 | 121,346,616 | 3 | 0 | 3 | 1 |
| Case 73 | 1 | 142,649,718 | 145,095,477 | 3 | 0 | 3 | 1 |
| Case 73 | 1 | 145,101,177 | 151,210,126 | 4 | 0 | 4 | 1 |
| Case 73 | 1 | 151,214,944 | 152,275,273 | 3 | 1 | 4 | 0 |
| Case 73 | 1 | 152,275,276 | 152,286,157 | 3 | 0 | 3 | 1 |
| Case 73 | 1 | 152,286,325 | 168,745,136 | 3 | 1 | 4 | 0 |
| Case 73 | 1 | 168,748,586 | 169,071,384 | 4 | 1 | 5 | 0 |
| Case 73 | 1 | 169,072,731 | 171,077,782 | 3 | 1 | 4 | 0 |
| Case 73 | 1 | 171,079,549 | 171,499,108 | 4 | 1 | 5 | 0 |
| Case 73 | 1 | 171,500,154 | 171,781,952 | 3 | 1 | 4 | 0 |
| Case 73 | 1 | 171,786,475 | 173,301,516 | 4 | 1 | 5 | 0 |
| Case 73 | 1 | 173,302,097 | 174,128,140 | 3 | 1 | 4 | 0 |
| Case 73 | 1 | 174,188,338 | 174,489,170 | 3 | 2 | 5 | 0 |
| Case 73 | 1 | 174,496,267 | 174,496,267 | 3 | 1 | 4 | 0 |
| Case 73 | 1 | 174,497,642 | 189,448,576 | 4 | 0 | 4 | 1 |
| Case 73 | 1 | 189,471,770 | 217,235,542 | 3 | 0 | 3 | 1 |
| Case 73 | 1 | 217,236,801 | 217,364,103 | 1 | 0 | 1 | 0 |
| Case 73 | 1 | 217,365,587 | 241,274,518 | 3 | 0 | 3 | 1 |
| Case 73 | 1 | 241,280,303 | 241,676,335 | 4 | 0 | 4 | 1 |
| Case 73 | 1 | 241,676,979 | 245,634,069 | 3 | 0 | 3 | 1 |
| Case 73 | 1 | 245,634,267 | 245,696,254 | 2 | 0 | 2 | 1 |
| Case 73 | 1 | 245,697,260 | 245,775,252 | 3 | 0 | 3 | 1 |
| Case 73 | 1 | 245,778,984 | 247,053,355 | 2 | 0 | 2 | 1 |
| Case 73 | 1 | 247,054,333 | 247,142,239 | 3 | 0 | 3 | 1 |

|         |   |             |             |   |   |   |   |
|---------|---|-------------|-------------|---|---|---|---|
| Case 73 | 1 | 247,142,532 | 247,582,310 | 2 | 0 | 2 | 1 |
| Case 73 | 1 | 247,584,075 | 247,710,867 | 3 | 0 | 3 | 1 |
| Case 73 | 1 | 247,712,512 | 248,524,890 | 2 | 0 | 2 | 1 |
| Case 73 | 1 | 248,524,967 | 248,569,959 | 3 | 0 | 3 | 1 |
| Case 73 | 1 | 248,569,960 | 248,688,317 | 2 | 0 | 2 | 1 |
| Case 73 | 1 | 248,756,502 | 248,790,425 | 0 | 0 | 0 | 0 |
| Case 73 | 1 | 248,801,588 | 249,218,992 | 3 | 0 | 3 | 1 |
| Case 73 | 2 | 18,674      | 18,674      | 3 | 2 | 5 | 0 |
| Case 73 | 2 | 18,856      | 343,517     | 4 | 1 | 5 | 0 |
| Case 73 | 2 | 343,588     | 681,739     | 3 | 1 | 4 | 0 |
| Case 73 | 2 | 682,363     | 1,019,512   | 4 | 1 | 5 | 0 |
| Case 73 | 2 | 1,019,753   | 1,951,254   | 3 | 1 | 4 | 0 |
| Case 73 | 2 | 1,951,389   | 3,063,237   | 4 | 1 | 5 | 0 |
| Case 73 | 2 | 3,066,698   | 3,894,559   | 3 | 1 | 4 | 0 |
| Case 73 | 2 | 3,895,167   | 9,417,334   | 4 | 1 | 5 | 0 |
| Case 73 | 2 | 9,419,106   | 9,662,210   | 3 | 1 | 4 | 0 |
| Case 73 | 2 | 9,666,349   | 10,142,302  | 4 | 1 | 5 | 0 |
| Case 73 | 2 | 10,145,348  | 10,194,192  | 3 | 1 | 4 | 0 |
| Case 73 | 2 | 10,194,487  | 11,718,858  | 4 | 1 | 5 | 0 |
| Case 73 | 2 | 11,720,838  | 11,943,118  | 3 | 1 | 4 | 0 |
| Case 73 | 2 | 11,959,905  | 18,102,223  | 4 | 1 | 5 | 0 |
| Case 73 | 2 | 18,112,301  | 18,116,319  | 3 | 1 | 4 | 0 |
| Case 73 | 2 | 18,117,930  | 21,227,503  | 4 | 1 | 5 | 0 |
| Case 73 | 2 | 21,227,517  | 21,263,900  | 3 | 1 | 4 | 0 |
| Case 73 | 2 | 21,263,905  | 23,538,843  | 4 | 1 | 5 | 0 |
| Case 73 | 2 | 23,539,934  | 23,932,461  | 3 | 1 | 4 | 0 |
| Case 73 | 2 | 23,947,589  | 26,159,940  | 4 | 1 | 5 | 0 |
| Case 73 | 2 | 26,173,503  | 36,934,887  | 3 | 1 | 4 | 0 |
| Case 73 | 2 | 36,935,291  | 36,948,760  | 2 | 0 | 2 | 1 |
| Case 73 | 2 | 36,954,530  | 43,343,806  | 3 | 1 | 4 | 0 |
| Case 73 | 2 | 43,349,680  | 43,452,183  | 4 | 1 | 5 | 0 |
| Case 73 | 2 | 43,452,202  | 44,021,624  | 3 | 1 | 4 | 0 |
| Case 73 | 2 | 44,021,676  | 44,211,546  | 3 | 0 | 3 | 1 |
| Case 73 | 2 | 44,212,008  | 47,272,245  | 3 | 1 | 4 | 0 |
| Case 73 | 2 | 47,273,468  | 48,771,605  | 4 | 2 | 6 | 0 |
| Case 73 | 2 | 48,776,217  | 48,845,706  | 3 | 2 | 5 | 0 |
| Case 73 | 2 | 48,846,647  | 53,968,774  | 4 | 2 | 6 | 0 |
| Case 73 | 2 | 53,984,957  | 54,023,088  | 3 | 2 | 5 | 0 |
| Case 73 | 2 | 54,023,133  | 77,234,621  | 3 | 1 | 4 | 0 |
| Case 73 | 2 | 77,234,767  | 78,048,788  | 4 | 3 | 7 | 0 |
| Case 73 | 2 | 78,061,074  | 92,081,640  | 3 | 1 | 4 | 0 |
| Case 73 | 2 | 95,429,424  | 122,176,722 | 3 | 1 | 4 | 0 |
| Case 73 | 2 | 122,182,729 | 122,288,029 | 2 | 1 | 3 | 0 |
| Case 73 | 2 | 122,316,046 | 122,797,678 | 3 | 1 | 4 | 0 |
| Case 73 | 2 | 122,833,317 | 128,341,722 | 2 | 1 | 3 | 0 |
| Case 73 | 2 | 128,344,389 | 130,208,064 | 2 | 0 | 2 | 1 |
| Case 73 | 2 | 130,216,043 | 154,984,566 | 2 | 1 | 3 | 0 |
| Case 73 | 2 | 154,994,668 | 160,239,116 | 3 | 1 | 4 | 0 |
| Case 73 | 2 | 160,239,267 | 160,691,494 | 4 | 0 | 4 | 1 |
| Case 73 | 2 | 160,692,117 | 165,383,526 | 3 | 1 | 4 | 0 |
| Case 73 | 2 | 165,394,580 | 165,581,707 | 1 | 0 | 1 | 0 |
| Case 73 | 2 | 165,584,049 | 165,584,614 | 3 | 0 | 3 | 1 |
| Case 73 | 2 | 165,584,691 | 165,864,123 | 3 | 1 | 4 | 0 |
| Case 73 | 2 | 165,868,477 | 166,648,792 | 3 | 0 | 3 | 1 |
| Case 73 | 2 | 166,654,980 | 166,731,930 | 3 | 1 | 4 | 0 |
| Case 73 | 2 | 166,732,698 | 167,377,995 | 3 | 0 | 3 | 1 |
| Case 73 | 2 | 167,379,259 | 167,855,303 | 3 | 1 | 4 | 0 |
| Case 73 | 2 | 167,857,670 | 215,748,105 | 3 | 0 | 3 | 1 |
| Case 73 | 2 | 215,752,084 | 225,927,665 | 4 | 0 | 4 | 1 |
| Case 73 | 2 | 225,929,498 | 227,530,721 | 5 | 0 | 5 | 1 |
| Case 73 | 2 | 227,530,857 | 227,957,614 | 4 | 0 | 4 | 1 |

|         |   |             |             |   |   |   |   |
|---------|---|-------------|-------------|---|---|---|---|
| Case 73 | 2 | 227,958,469 | 228,100,150 | 5 | 0 | 5 | 1 |
| Case 73 | 2 | 228,102,723 | 229,155,830 | 4 | 0 | 4 | 1 |
| Case 73 | 2 | 229,168,274 | 230,103,927 | 5 | 0 | 5 | 1 |
| Case 73 | 2 | 230,109,580 | 243,048,760 | 4 | 0 | 4 | 1 |
| Case 73 | 3 | 61,495      | 701,825     | 1 | 0 | 1 | 0 |
| Case 73 | 3 | 703,725     | 710,880     | 0 | 0 | 0 | 0 |
| Case 73 | 3 | 712,551     | 1,368,840   | 1 | 0 | 1 | 0 |
| Case 73 | 3 | 1,369,171   | 1,374,539   | 0 | 0 | 0 | 0 |
| Case 73 | 3 | 1,375,734   | 3,885,609   | 1 | 0 | 1 | 0 |
| Case 73 | 3 | 3,886,665   | 3,888,177   | 2 | 0 | 2 | 1 |
| Case 73 | 3 | 3,888,392   | 4,276,680   | 1 | 0 | 1 | 0 |
| Case 73 | 3 | 4,282,950   | 23,249,069  | 2 | 1 | 3 | 0 |
| Case 73 | 3 | 23,260,467  | 23,505,899  | 1 | 1 | 2 | 0 |
| Case 73 | 3 | 23,511,338  | 36,466,050  | 2 | 1 | 3 | 0 |
| Case 73 | 3 | 36,470,307  | 36,898,699  | 3 | 1 | 4 | 0 |
| Case 73 | 3 | 36,898,757  | 37,367,159  | 4 | 0 | 4 | 1 |
| Case 73 | 3 | 37,367,249  | 37,618,011  | 3 | 1 | 4 | 0 |
| Case 73 | 3 | 37,633,548  | 40,595,426  | 2 | 1 | 3 | 0 |
| Case 73 | 3 | 40,600,392  | 41,085,459  | 3 | 1 | 4 | 0 |
| Case 73 | 3 | 41,086,761  | 57,779,836  | 2 | 1 | 3 | 0 |
| Case 73 | 3 | 57,790,596  | 57,875,813  | 1 | 1 | 2 | 0 |
| Case 73 | 3 | 57,882,601  | 60,523,330  | 2 | 1 | 3 | 0 |
| Case 73 | 3 | 60,531,242  | 60,600,915  | 3 | 0 | 3 | 1 |
| Case 73 | 3 | 60,602,816  | 60,860,868  | 2 | 0 | 2 | 1 |
| Case 73 | 3 | 60,871,882  | 62,544,685  | 2 | 1 | 3 | 0 |
| Case 73 | 3 | 62,548,081  | 62,565,383  | 1 | 0 | 1 | 0 |
| Case 73 | 3 | 62,568,321  | 65,346,924  | 2 | 1 | 3 | 0 |
| Case 73 | 3 | 65,347,423  | 80,450,254  | 3 | 1 | 4 | 0 |
| Case 73 | 3 | 80,456,863  | 90,442,925  | 2 | 1 | 3 | 0 |
| Case 73 | 3 | 93,537,290  | 93,645,047  | 2 | 1 | 3 | 0 |
| Case 73 | 3 | 93,646,095  | 97,879,569  | 2 | 2 | 4 | 0 |
| Case 73 | 3 | 97,883,653  | 98,073,313  | 3 | 0 | 3 | 1 |
| Case 73 | 3 | 98,073,382  | 102,883,817 | 2 | 2 | 4 | 0 |
| Case 73 | 3 | 102,892,138 | 103,795,249 | 4 | 2 | 6 | 0 |
| Case 73 | 3 | 103,801,180 | 106,335,082 | 3 | 2 | 5 | 0 |
| Case 73 | 3 | 106,335,897 | 107,429,321 | 4 | 2 | 6 | 0 |
| Case 73 | 3 | 107,435,527 | 107,489,754 | 3 | 2 | 5 | 0 |
| Case 73 | 3 | 107,491,892 | 109,283,828 | 2 | 2 | 4 | 0 |
| Case 73 | 3 | 109,284,286 | 109,363,105 | 3 | 0 | 3 | 1 |
| Case 73 | 3 | 109,405,414 | 127,253,904 | 2 | 2 | 4 | 0 |
| Case 73 | 3 | 127,254,061 | 127,413,976 | 2 | 1 | 3 | 0 |
| Case 73 | 3 | 127,415,047 | 171,041,464 | 2 | 2 | 4 | 0 |
| Case 73 | 3 | 171,048,165 | 171,092,504 | 3 | 0 | 3 | 1 |
| Case 73 | 3 | 171,093,738 | 174,540,260 | 2 | 2 | 4 | 0 |
| Case 73 | 3 | 174,540,381 | 174,659,289 | 2 | 1 | 3 | 0 |
| Case 73 | 3 | 174,667,446 | 175,082,324 | 2 | 2 | 4 | 0 |
| Case 73 | 3 | 175,090,662 | 175,139,842 | 2 | 0 | 2 | 1 |
| Case 73 | 3 | 175,148,366 | 183,954,203 | 2 | 2 | 4 | 0 |
| Case 73 | 3 | 183,955,017 | 184,076,081 | 2 | 1 | 3 | 0 |
| Case 73 | 3 | 184,076,765 | 191,687,812 | 2 | 2 | 4 | 0 |
| Case 73 | 3 | 191,694,215 | 197,838,262 | 2 | 1 | 3 | 0 |
| Case 73 | 4 | 71,566      | 11,054,542  | 3 | 0 | 3 | 1 |
| Case 73 | 4 | 11,055,432  | 11,275,048  | 4 | 0 | 4 | 1 |
| Case 73 | 4 | 11,276,716  | 12,588,094  | 3 | 0 | 3 | 1 |
| Case 73 | 4 | 12,590,868  | 12,590,868  | 2 | 0 | 2 | 1 |
| Case 73 | 4 | 12,593,370  | 12,631,827  | 0 | 0 | 0 | 0 |
| Case 73 | 4 | 12,633,072  | 12,643,903  | 1 | 0 | 1 | 0 |
| Case 73 | 4 | 12,662,979  | 30,451,158  | 3 | 0 | 3 | 1 |
| Case 73 | 4 | 30,452,567  | 30,467,623  | 2 | 0 | 2 | 1 |
| Case 73 | 4 | 30,471,257  | 38,167,985  | 3 | 0 | 3 | 1 |
| Case 73 | 4 | 38,169,660  | 38,775,929  | 4 | 0 | 4 | 1 |

|         |   |             |             |   |   |   |   |
|---------|---|-------------|-------------|---|---|---|---|
| Case 73 | 4 | 38,776,070  | 38,916,914  | 3 | 0 | 3 | 1 |
| Case 73 | 4 | 38,917,830  | 39,162,457  | 4 | 0 | 4 | 1 |
| Case 73 | 4 | 39,174,790  | 49,620,898  | 3 | 0 | 3 | 1 |
| Case 73 | 4 | 52,697,856  | 82,417,143  | 3 | 0 | 3 | 1 |
| Case 73 | 4 | 82,422,327  | 83,019,396  | 4 | 0 | 4 | 1 |
| Case 73 | 4 | 83,026,356  | 85,844,157  | 3 | 0 | 3 | 1 |
| Case 73 | 4 | 85,858,329  | 88,231,428  | 2 | 0 | 2 | 1 |
| Case 73 | 4 | 88,231,429  | 88,261,712  | 1 | 0 | 1 | 0 |
| Case 73 | 4 | 88,264,614  | 89,174,193  | 2 | 0 | 2 | 1 |
| Case 73 | 4 | 89,183,194  | 89,203,197  | 1 | 0 | 1 | 0 |
| Case 73 | 4 | 89,203,670  | 89,299,174  | 2 | 0 | 2 | 1 |
| Case 73 | 4 | 89,300,101  | 89,393,651  | 1 | 0 | 1 | 0 |
| Case 73 | 4 | 89,397,091  | 91,526,531  | 2 | 0 | 2 | 1 |
| Case 73 | 4 | 91,532,461  | 92,218,323  | 1 | 0 | 1 | 0 |
| Case 73 | 4 | 92,225,277  | 92,281,057  | 2 | 0 | 2 | 1 |
| Case 73 | 4 | 92,283,771  | 92,483,806  | 1 | 0 | 1 | 0 |
| Case 73 | 4 | 92,496,463  | 99,387,827  | 2 | 0 | 2 | 1 |
| Case 73 | 4 | 99,392,101  | 99,555,740  | 3 | 0 | 3 | 1 |
| Case 73 | 4 | 99,556,496  | 109,151,467 | 2 | 0 | 2 | 1 |
| Case 73 | 4 | 109,162,596 | 109,477,779 | 3 | 0 | 3 | 1 |
| Case 73 | 4 | 109,486,382 | 113,251,677 | 2 | 0 | 2 | 1 |
| Case 73 | 4 | 113,260,465 | 113,343,224 | 3 | 0 | 3 | 1 |
| Case 73 | 4 | 113,344,203 | 115,499,117 | 2 | 0 | 2 | 1 |
| Case 73 | 4 | 115,499,674 | 115,559,446 | 3 | 0 | 3 | 1 |
| Case 73 | 4 | 115,560,225 | 119,950,186 | 2 | 0 | 2 | 1 |
| Case 73 | 4 | 119,951,510 | 119,956,411 | 3 | 0 | 3 | 1 |
| Case 73 | 4 | 119,962,741 | 124,282,603 | 2 | 0 | 2 | 1 |
| Case 73 | 4 | 124,283,138 | 124,469,200 | 3 | 0 | 3 | 1 |
| Case 73 | 4 | 124,473,935 | 127,105,360 | 2 | 0 | 2 | 1 |
| Case 73 | 4 | 127,105,857 | 128,674,030 | 3 | 0 | 3 | 1 |
| Case 73 | 4 | 128,684,607 | 128,761,940 | 2 | 0 | 2 | 1 |
| Case 73 | 4 | 128,766,074 | 128,816,138 | 3 | 0 | 3 | 1 |
| Case 73 | 4 | 128,817,558 | 129,281,445 | 2 | 0 | 2 | 1 |
| Case 73 | 4 | 129,281,866 | 129,682,775 | 3 | 0 | 3 | 1 |
| Case 73 | 4 | 129,685,158 | 134,359,051 | 2 | 0 | 2 | 1 |
| Case 73 | 4 | 134,376,495 | 134,384,791 | 1 | 0 | 1 | 0 |
| Case 73 | 4 | 134,389,485 | 140,815,925 | 2 | 0 | 2 | 1 |
| Case 73 | 4 | 140,816,174 | 141,246,800 | 3 | 0 | 3 | 1 |
| Case 73 | 4 | 141,249,813 | 146,073,143 | 2 | 0 | 2 | 1 |
| Case 73 | 4 | 146,073,711 | 146,082,942 | 1 | 0 | 1 | 0 |
| Case 73 | 4 | 146,123,564 | 153,896,656 | 2 | 0 | 2 | 1 |
| Case 73 | 4 | 153,896,691 | 154,087,943 | 3 | 0 | 3 | 1 |
| Case 73 | 4 | 154,094,001 | 154,673,127 | 2 | 0 | 2 | 1 |
| Case 73 | 4 | 154,675,860 | 154,891,356 | 3 | 0 | 3 | 1 |
| Case 73 | 4 | 154,891,741 | 179,620,557 | 2 | 0 | 2 | 1 |
| Case 73 | 4 | 179,620,725 | 179,665,417 | 1 | 0 | 1 | 0 |
| Case 73 | 4 | 179,677,801 | 190,963,766 | 2 | 0 | 2 | 1 |
| Case 73 | 5 | 38,139      | 188,747     | 2 | 0 | 2 | 1 |
| Case 73 | 5 | 188,918     | 192,294     | 1 | 0 | 1 | 0 |
| Case 73 | 5 | 194,849     | 2,601,689   | 2 | 0 | 2 | 1 |
| Case 73 | 5 | 2,604,686   | 2,610,337   | 1 | 0 | 1 | 0 |
| Case 73 | 5 | 2,610,744   | 5,464,962   | 2 | 0 | 2 | 1 |
| Case 73 | 5 | 5,465,316   | 5,495,373   | 1 | 0 | 1 | 0 |
| Case 73 | 5 | 5,496,203   | 7,149,265   | 2 | 0 | 2 | 1 |
| Case 73 | 5 | 7,149,777   | 7,158,473   | 1 | 0 | 1 | 0 |
| Case 73 | 5 | 7,164,445   | 7,858,121   | 2 | 0 | 2 | 1 |
| Case 73 | 5 | 7,859,434   | 7,866,822   | 1 | 0 | 1 | 0 |
| Case 73 | 5 | 7,866,906   | 7,879,950   | 2 | 0 | 2 | 1 |
| Case 73 | 5 | 7,879,983   | 7,897,061   | 1 | 0 | 1 | 0 |
| Case 73 | 5 | 7,897,185   | 8,067,973   | 2 | 0 | 2 | 1 |
| Case 73 | 5 | 8,073,071   | 8,172,103   | 1 | 0 | 1 | 0 |

|         |   |            |            |   |   |   |   |
|---------|---|------------|------------|---|---|---|---|
| Case 73 | 5 | 8,173,436  | 9,364,904  | 2 | 0 | 2 | 1 |
| Case 73 | 5 | 9,371,411  | 34,166,261 | 3 | 0 | 3 | 1 |
| Case 73 | 5 | 34,180,455 | 35,084,647 | 2 | 2 | 4 | 0 |
| Case 73 | 5 | 35,084,704 | 36,224,240 | 3 | 2 | 5 | 0 |
| Case 73 | 5 | 36,226,617 | 36,985,089 | 3 | 3 | 6 | 0 |
| Case 73 | 5 | 36,985,115 | 36,985,888 | 3 | 1 | 4 | 0 |
| Case 73 | 5 | 36,986,050 | 37,361,728 | 4 | 2 | 6 | 0 |
| Case 73 | 5 | 37,364,475 | 40,991,344 | 3 | 2 | 5 | 0 |
| Case 73 | 5 | 40,994,519 | 41,037,603 | 2 | 2 | 4 | 0 |
| Case 73 | 5 | 41,037,965 | 42,385,855 | 3 | 2 | 5 | 0 |
| Case 73 | 5 | 42,388,894 | 42,626,206 | 3 | 0 | 3 | 1 |
| Case 73 | 5 | 42,631,264 | 43,009,986 | 3 | 2 | 5 | 0 |
| Case 73 | 5 | 43,028,221 | 43,989,069 | 2 | 2 | 4 | 0 |
| Case 73 | 5 | 44,002,170 | 46,399,093 | 3 | 2 | 5 | 0 |
| Case 73 | 5 | 49,457,282 | 49,522,346 | 3 | 2 | 5 | 0 |
| Case 73 | 5 | 49,564,798 | 51,879,370 | 2 | 0 | 2 | 1 |
| Case 73 | 5 | 51,886,039 | 51,991,651 | 3 | 0 | 3 | 1 |
| Case 73 | 5 | 51,996,032 | 53,585,870 | 2 | 0 | 2 | 1 |
| Case 73 | 5 | 53,587,702 | 53,929,224 | 3 | 0 | 3 | 1 |
| Case 73 | 5 | 53,931,756 | 55,147,460 | 2 | 0 | 2 | 1 |
| Case 73 | 5 | 55,149,235 | 55,244,038 | 3 | 0 | 3 | 1 |
| Case 73 | 5 | 55,247,795 | 55,322,895 | 2 | 0 | 2 | 1 |
| Case 73 | 5 | 55,324,494 | 55,702,460 | 3 | 0 | 3 | 1 |
| Case 73 | 5 | 55,704,176 | 58,334,645 | 2 | 0 | 2 | 1 |
| Case 73 | 5 | 58,334,922 | 58,698,524 | 1 | 0 | 1 | 0 |
| Case 73 | 5 | 58,704,650 | 60,135,985 | 2 | 0 | 2 | 1 |
| Case 73 | 5 | 60,147,754 | 60,238,590 | 1 | 0 | 1 | 0 |
| Case 73 | 5 | 60,241,826 | 60,356,423 | 2 | 0 | 2 | 1 |
| Case 73 | 5 | 60,357,869 | 60,455,827 | 1 | 0 | 1 | 0 |
| Case 73 | 5 | 60,455,923 | 60,839,615 | 2 | 0 | 2 | 1 |
| Case 73 | 5 | 60,839,907 | 61,472,904 | 3 | 0 | 3 | 1 |
| Case 73 | 5 | 61,474,164 | 61,923,102 | 2 | 0 | 2 | 1 |
| Case 73 | 5 | 61,926,784 | 63,510,064 | 3 | 0 | 3 | 1 |
| Case 73 | 5 | 63,510,087 | 63,793,012 | 2 | 0 | 2 | 1 |
| Case 73 | 5 | 63,793,107 | 63,982,806 | 3 | 0 | 3 | 1 |
| Case 73 | 5 | 63,986,463 | 64,340,353 | 2 | 0 | 2 | 1 |
| Case 73 | 5 | 64,347,621 | 64,548,634 | 3 | 0 | 3 | 1 |
| Case 73 | 5 | 64,551,463 | 64,965,900 | 2 | 0 | 2 | 1 |
| Case 73 | 5 | 64,968,615 | 65,183,502 | 3 | 0 | 3 | 1 |
| Case 73 | 5 | 65,185,421 | 65,533,655 | 2 | 0 | 2 | 1 |
| Case 73 | 5 | 65,534,403 | 67,326,258 | 3 | 0 | 3 | 1 |
| Case 73 | 5 | 67,332,561 | 67,728,508 | 2 | 0 | 2 | 1 |
| Case 73 | 5 | 67,729,637 | 68,263,602 | 3 | 0 | 3 | 1 |
| Case 73 | 5 | 68,278,990 | 68,709,884 | 2 | 0 | 2 | 1 |
| Case 73 | 5 | 68,715,249 | 68,749,848 | 3 | 0 | 3 | 1 |
| Case 73 | 5 | 68,757,774 | 70,858,268 | 2 | 0 | 2 | 1 |
| Case 73 | 5 | 70,860,663 | 72,032,166 | 3 | 0 | 3 | 1 |
| Case 73 | 5 | 72,053,706 | 72,400,190 | 2 | 0 | 2 | 1 |
| Case 73 | 5 | 72,407,538 | 72,861,455 | 3 | 0 | 3 | 1 |
| Case 73 | 5 | 72,862,289 | 73,068,888 | 2 | 0 | 2 | 1 |
| Case 73 | 5 | 73,069,226 | 73,981,270 | 3 | 0 | 3 | 1 |
| Case 73 | 5 | 73,981,299 | 76,738,927 | 2 | 0 | 2 | 1 |
| Case 73 | 5 | 76,738,970 | 76,760,080 | 1 | 0 | 1 | 0 |
| Case 73 | 5 | 76,760,612 | 77,406,104 | 2 | 0 | 2 | 1 |
| Case 73 | 5 | 77,409,637 | 77,572,439 | 1 | 0 | 1 | 0 |
| Case 73 | 5 | 77,579,205 | 79,734,297 | 2 | 0 | 2 | 1 |
| Case 73 | 5 | 79,734,395 | 79,773,132 | 1 | 0 | 1 | 0 |
| Case 73 | 5 | 79,774,171 | 80,016,874 | 2 | 0 | 2 | 1 |
| Case 73 | 5 | 80,021,168 | 80,164,943 | 1 | 0 | 1 | 0 |
| Case 73 | 5 | 80,168,005 | 85,795,217 | 2 | 0 | 2 | 1 |
| Case 73 | 5 | 85,805,054 | 86,539,266 | 3 | 0 | 3 | 1 |

|         |   |             |             |   |   |   |   |
|---------|---|-------------|-------------|---|---|---|---|
| Case 73 | 5 | 86,540,308  | 95,827,499  | 2 | 0 | 2 | 1 |
| Case 73 | 5 | 95,836,300  | 95,949,002  | 3 | 0 | 3 | 1 |
| Case 73 | 5 | 95,949,048  | 133,066,313 | 2 | 0 | 2 | 1 |
| Case 73 | 5 | 133,072,525 | 133,439,876 | 3 | 0 | 3 | 1 |
| Case 73 | 5 | 133,441,726 | 140,718,936 | 2 | 0 | 2 | 1 |
| Case 73 | 5 | 140,718,994 | 140,749,646 | 3 | 0 | 3 | 1 |
| Case 73 | 5 | 140,749,955 | 140,867,123 | 2 | 0 | 2 | 1 |
| Case 73 | 5 | 140,867,277 | 140,892,643 | 3 | 0 | 3 | 1 |
| Case 73 | 5 | 140,895,377 | 141,964,202 | 2 | 0 | 2 | 1 |
| Case 73 | 5 | 141,971,281 | 142,431,193 | 3 | 0 | 3 | 1 |
| Case 73 | 5 | 142,433,727 | 145,062,940 | 2 | 0 | 2 | 1 |
| Case 73 | 5 | 145,068,327 | 146,320,823 | 3 | 0 | 3 | 1 |
| Case 73 | 5 | 146,334,385 | 150,945,465 | 2 | 0 | 2 | 1 |
| Case 73 | 5 | 150,945,483 | 150,998,029 | 3 | 0 | 3 | 1 |
| Case 73 | 5 | 150,998,797 | 159,923,720 | 2 | 0 | 2 | 1 |
| Case 73 | 5 | 159,926,960 | 159,992,648 | 3 | 0 | 3 | 1 |
| Case 73 | 5 | 159,992,655 | 164,170,398 | 2 | 0 | 2 | 1 |
| Case 73 | 5 | 164,172,766 | 180,693,127 | 3 | 0 | 3 | 1 |
| Case 73 | 6 | 108,666     | 1,913,138   | 3 | 1 | 4 | 0 |
| Case 73 | 6 | 1,915,129   | 2,123,744   | 3 | 0 | 3 | 1 |
| Case 73 | 6 | 2,139,450   | 2,760,872   | 3 | 2 | 5 | 0 |
| Case 73 | 6 | 2,765,899   | 20,486,506  | 3 | 1 | 4 | 0 |
| Case 73 | 6 | 20,486,920  | 20,571,135  | 2 | 1 | 3 | 0 |
| Case 73 | 6 | 20,580,893  | 23,440,413  | 3 | 1 | 4 | 0 |
| Case 73 | 6 | 23,441,842  | 29,657,127  | 2 | 1 | 3 | 0 |
| Case 73 | 6 | 29,658,569  | 29,689,590  | 1 | 1 | 2 | 0 |
| Case 73 | 6 | 29,691,019  | 29,742,342  | 2 | 1 | 3 | 0 |
| Case 73 | 6 | 29,742,809  | 30,342,682  | 3 | 0 | 3 | 1 |
| Case 73 | 6 | 30,342,753  | 31,034,173  | 2 | 1 | 3 | 0 |
| Case 73 | 6 | 31,034,235  | 31,075,375  | 1 | 1 | 2 | 0 |
| Case 73 | 6 | 31,075,481  | 32,665,616  | 2 | 1 | 3 | 0 |
| Case 73 | 6 | 32,665,728  | 32,682,394  | 1 | 1 | 2 | 0 |
| Case 73 | 6 | 32,682,664  | 32,767,091  | 2 | 1 | 3 | 0 |
| Case 73 | 6 | 32,767,496  | 32,774,465  | 1 | 1 | 2 | 0 |
| Case 73 | 6 | 32,775,809  | 33,004,387  | 2 | 1 | 3 | 0 |
| Case 73 | 6 | 33,004,917  | 33,644,033  | 3 | 0 | 3 | 1 |
| Case 73 | 6 | 33,644,253  | 38,400,139  | 2 | 1 | 3 | 0 |
| Case 73 | 6 | 38,415,481  | 57,246,925  | 3 | 1 | 4 | 0 |
| Case 73 | 6 | 57,255,152  | 58,150,777  | 2 | 1 | 3 | 0 |
| Case 73 | 6 | 58,168,152  | 58,752,089  | 3 | 1 | 4 | 0 |
| Case 73 | 6 | 61,891,118  | 62,865,650  | 2 | 1 | 3 | 0 |
| Case 73 | 6 | 62,865,692  | 67,309,864  | 3 | 1 | 4 | 0 |
| Case 73 | 6 | 67,322,556  | 67,441,714  | 2 | 0 | 2 | 1 |
| Case 73 | 6 | 67,446,248  | 67,519,114  | 1 | 0 | 1 | 0 |
| Case 73 | 6 | 67,528,476  | 68,062,743  | 2 | 0 | 2 | 1 |
| Case 73 | 6 | 68,064,253  | 68,728,797  | 1 | 0 | 1 | 0 |
| Case 73 | 6 | 68,729,130  | 68,884,304  | 2 | 0 | 2 | 1 |
| Case 73 | 6 | 68,887,832  | 68,950,223  | 1 | 0 | 1 | 0 |
| Case 73 | 6 | 68,950,298  | 69,256,487  | 2 | 0 | 2 | 1 |
| Case 73 | 6 | 69,260,172  | 69,459,942  | 1 | 0 | 1 | 0 |
| Case 73 | 6 | 69,460,974  | 69,548,012  | 2 | 0 | 2 | 1 |
| Case 73 | 6 | 69,549,271  | 69,665,063  | 1 | 0 | 1 | 0 |
| Case 73 | 6 | 69,665,925  | 70,389,764  | 2 | 0 | 2 | 1 |
| Case 73 | 6 | 70,391,640  | 70,550,975  | 1 | 0 | 1 | 0 |
| Case 73 | 6 | 70,551,688  | 71,180,505  | 2 | 0 | 2 | 1 |
| Case 73 | 6 | 71,185,149  | 71,234,960  | 1 | 0 | 1 | 0 |
| Case 73 | 6 | 71,234,985  | 72,674,436  | 2 | 0 | 2 | 1 |
| Case 73 | 6 | 72,677,981  | 72,984,123  | 1 | 0 | 1 | 0 |
| Case 73 | 6 | 72,993,334  | 73,188,274  | 2 | 0 | 2 | 1 |
| Case 73 | 6 | 73,190,006  | 73,303,078  | 1 | 0 | 1 | 0 |
| Case 73 | 6 | 73,306,528  | 74,125,888  | 2 | 0 | 2 | 1 |

|         |   |             |             |   |   |   |   |
|---------|---|-------------|-------------|---|---|---|---|
| Case 73 | 6 | 74,126,084  | 74,171,753  | 1 | 0 | 1 | 0 |
| Case 73 | 6 | 74,176,061  | 74,225,333  | 2 | 0 | 2 | 1 |
| Case 73 | 6 | 74,226,353  | 74,228,049  | 1 | 0 | 1 | 0 |
| Case 73 | 6 | 74,229,405  | 74,493,432  | 2 | 0 | 2 | 1 |
| Case 73 | 6 | 74,493,494  | 74,497,005  | 1 | 0 | 1 | 0 |
| Case 73 | 6 | 74,497,009  | 75,415,209  | 2 | 0 | 2 | 1 |
| Case 73 | 6 | 75,427,451  | 75,585,795  | 1 | 0 | 1 | 0 |
| Case 73 | 6 | 75,587,451  | 75,785,441  | 2 | 0 | 2 | 1 |
| Case 73 | 6 | 75,789,526  | 75,838,596  | 1 | 0 | 1 | 0 |
| Case 73 | 6 | 75,840,120  | 76,256,751  | 2 | 0 | 2 | 1 |
| Case 73 | 6 | 76,265,642  | 76,419,261  | 1 | 0 | 1 | 0 |
| Case 73 | 6 | 76,425,028  | 77,577,055  | 2 | 0 | 2 | 1 |
| Case 73 | 6 | 77,587,889  | 77,872,189  | 1 | 0 | 1 | 0 |
| Case 73 | 6 | 77,877,447  | 79,595,097  | 2 | 0 | 2 | 1 |
| Case 73 | 6 | 79,607,589  | 79,754,360  | 1 | 0 | 1 | 0 |
| Case 73 | 6 | 79,787,224  | 80,724,261  | 2 | 0 | 2 | 1 |
| Case 73 | 6 | 80,724,274  | 80,751,942  | 1 | 0 | 1 | 0 |
| Case 73 | 6 | 80,754,346  | 81,786,684  | 2 | 0 | 2 | 1 |
| Case 73 | 6 | 81,792,413  | 81,934,605  | 1 | 0 | 1 | 0 |
| Case 73 | 6 | 81,960,107  | 82,159,696  | 2 | 0 | 2 | 1 |
| Case 73 | 6 | 82,169,305  | 88,663,964  | 3 | 0 | 3 | 1 |
| Case 73 | 6 | 88,669,274  | 89,854,436  | 2 | 0 | 2 | 1 |
| Case 73 | 6 | 89,855,957  | 89,868,128  | 1 | 0 | 1 | 0 |
| Case 73 | 6 | 89,871,524  | 90,005,925  | 2 | 0 | 2 | 1 |
| Case 73 | 6 | 90,006,421  | 93,163,594  | 3 | 0 | 3 | 1 |
| Case 73 | 6 | 93,166,766  | 93,467,158  | 4 | 0 | 4 | 1 |
| Case 73 | 6 | 93,473,885  | 93,920,448  | 3 | 0 | 3 | 1 |
| Case 73 | 6 | 93,921,556  | 93,947,347  | 2 | 0 | 2 | 1 |
| Case 73 | 6 | 93,949,168  | 93,967,943  | 1 | 0 | 1 | 0 |
| Case 73 | 6 | 93,969,123  | 94,067,986  | 2 | 0 | 2 | 1 |
| Case 73 | 6 | 94,068,112  | 94,133,927  | 1 | 0 | 1 | 0 |
| Case 73 | 6 | 94,137,146  | 94,500,169  | 2 | 0 | 2 | 1 |
| Case 73 | 6 | 94,506,703  | 94,640,147  | 1 | 0 | 1 | 0 |
| Case 73 | 6 | 94,646,136  | 94,885,246  | 2 | 0 | 2 | 1 |
| Case 73 | 6 | 94,887,219  | 95,034,121  | 1 | 0 | 1 | 0 |
| Case 73 | 6 | 95,035,288  | 95,335,012  | 2 | 0 | 2 | 1 |
| Case 73 | 6 | 95,335,095  | 95,456,914  | 1 | 0 | 1 | 0 |
| Case 73 | 6 | 95,458,317  | 96,025,446  | 2 | 0 | 2 | 1 |
| Case 73 | 6 | 96,034,050  | 96,053,941  | 1 | 0 | 1 | 0 |
| Case 73 | 6 | 96,054,019  | 96,283,525  | 2 | 0 | 2 | 1 |
| Case 73 | 6 | 96,283,669  | 96,324,667  | 1 | 0 | 1 | 0 |
| Case 73 | 6 | 96,326,035  | 96,572,628  | 2 | 0 | 2 | 1 |
| Case 73 | 6 | 96,574,671  | 96,734,699  | 1 | 0 | 1 | 0 |
| Case 73 | 6 | 96,739,393  | 97,616,717  | 2 | 0 | 2 | 1 |
| Case 73 | 6 | 97,621,027  | 97,702,450  | 1 | 0 | 1 | 0 |
| Case 73 | 6 | 97,717,794  | 99,270,533  | 2 | 0 | 2 | 1 |
| Case 73 | 6 | 99,275,290  | 99,326,490  | 1 | 0 | 1 | 0 |
| Case 73 | 6 | 99,328,430  | 99,849,191  | 2 | 0 | 2 | 1 |
| Case 73 | 6 | 99,849,261  | 99,858,828  | 1 | 0 | 1 | 0 |
| Case 73 | 6 | 99,862,498  | 99,889,915  | 2 | 0 | 2 | 1 |
| Case 73 | 6 | 99,891,475  | 99,936,165  | 1 | 0 | 1 | 0 |
| Case 73 | 6 | 99,939,045  | 101,049,108 | 2 | 0 | 2 | 1 |
| Case 73 | 6 | 101,054,930 | 101,275,792 | 1 | 0 | 1 | 0 |
| Case 73 | 6 | 101,295,873 | 101,916,765 | 2 | 0 | 2 | 1 |
| Case 73 | 6 | 101,927,338 | 101,989,945 | 1 | 0 | 1 | 0 |
| Case 73 | 6 | 101,990,259 | 102,485,159 | 2 | 0 | 2 | 1 |
| Case 73 | 6 | 102,492,342 | 102,594,313 | 1 | 0 | 1 | 0 |
| Case 73 | 6 | 102,595,588 | 102,922,642 | 2 | 0 | 2 | 1 |
| Case 73 | 6 | 102,931,736 | 103,292,745 | 1 | 0 | 1 | 0 |
| Case 73 | 6 | 103,294,020 | 103,515,907 | 2 | 0 | 2 | 1 |
| Case 73 | 6 | 103,519,056 | 103,842,567 | 1 | 0 | 1 | 0 |

|         |   |             |             |   |   |   |   |
|---------|---|-------------|-------------|---|---|---|---|
| Case 73 | 6 | 103,843,363 | 104,512,842 | 2 | 0 | 2 | 1 |
| Case 73 | 6 | 104,513,200 | 104,560,332 | 1 | 0 | 1 | 0 |
| Case 73 | 6 | 104,583,607 | 105,171,129 | 2 | 0 | 2 | 1 |
| Case 73 | 6 | 105,173,534 | 105,288,125 | 1 | 0 | 1 | 0 |
| Case 73 | 6 | 105,302,222 | 106,969,266 | 2 | 0 | 2 | 1 |
| Case 73 | 6 | 106,969,279 | 106,980,324 | 1 | 0 | 1 | 0 |
| Case 73 | 6 | 106,981,188 | 109,190,126 | 2 | 0 | 2 | 1 |
| Case 73 | 6 | 109,197,379 | 109,483,826 | 1 | 0 | 1 | 0 |
| Case 73 | 6 | 109,497,085 | 109,771,583 | 2 | 0 | 2 | 1 |
| Case 73 | 6 | 109,771,594 | 109,772,822 | 1 | 0 | 1 | 0 |
| Case 73 | 6 | 109,772,868 | 110,734,613 | 2 | 0 | 2 | 1 |
| Case 73 | 6 | 110,734,638 | 110,819,059 | 3 | 0 | 3 | 1 |
| Case 73 | 6 | 110,828,403 | 111,913,053 | 2 | 0 | 2 | 1 |
| Case 73 | 6 | 111,913,058 | 112,383,780 | 3 | 0 | 3 | 1 |
| Case 73 | 6 | 112,389,407 | 112,621,590 | 2 | 0 | 2 | 1 |
| Case 73 | 6 | 112,621,834 | 112,882,942 | 3 | 0 | 3 | 1 |
| Case 73 | 6 | 112,891,101 | 114,437,276 | 2 | 0 | 2 | 1 |
| Case 73 | 6 | 114,447,603 | 114,561,617 | 3 | 0 | 3 | 1 |
| Case 73 | 6 | 114,563,699 | 118,103,840 | 2 | 0 | 2 | 1 |
| Case 73 | 6 | 118,107,037 | 118,435,377 | 3 | 0 | 3 | 1 |
| Case 73 | 6 | 118,436,112 | 119,473,094 | 2 | 0 | 2 | 1 |
| Case 73 | 6 | 119,485,199 | 120,485,517 | 3 | 0 | 3 | 1 |
| Case 73 | 6 | 120,488,382 | 120,533,642 | 2 | 0 | 2 | 1 |
| Case 73 | 6 | 120,535,362 | 120,862,765 | 1 | 0 | 1 | 0 |
| Case 73 | 6 | 120,863,569 | 121,432,111 | 2 | 0 | 2 | 1 |
| Case 73 | 6 | 121,433,696 | 121,638,732 | 1 | 0 | 1 | 0 |
| Case 73 | 6 | 121,642,851 | 122,709,984 | 2 | 0 | 2 | 1 |
| Case 73 | 6 | 122,712,377 | 123,571,228 | 3 | 0 | 3 | 1 |
| Case 73 | 6 | 123,580,933 | 123,868,506 | 2 | 0 | 2 | 1 |
| Case 73 | 6 | 123,868,992 | 133,195,740 | 3 | 0 | 3 | 1 |
| Case 73 | 6 | 133,207,105 | 139,518,546 | 3 | 1 | 4 | 0 |
| Case 73 | 6 | 139,540,103 | 139,563,787 | 3 | 2 | 5 | 0 |
| Case 73 | 6 | 139,563,914 | 140,614,699 | 2 | 2 | 4 | 0 |
| Case 73 | 6 | 140,624,563 | 141,582,182 | 3 | 1 | 4 | 0 |
| Case 73 | 6 | 141,587,036 | 142,921,498 | 4 | 1 | 5 | 0 |
| Case 73 | 6 | 142,922,061 | 145,162,512 | 3 | 1 | 4 | 0 |
| Case 73 | 6 | 145,165,362 | 145,729,196 | 4 | 1 | 5 | 0 |
| Case 73 | 6 | 145,732,167 | 146,872,685 | 3 | 1 | 4 | 0 |
| Case 73 | 6 | 146,873,614 | 147,175,178 | 4 | 1 | 5 | 0 |
| Case 73 | 6 | 147,178,335 | 169,652,568 | 3 | 1 | 4 | 0 |
| Case 73 | 6 | 169,656,029 | 170,980,171 | 2 | 1 | 3 | 0 |
| Case 73 | 7 | 44,935      | 68,920      | 3 | 2 | 5 | 0 |
| Case 73 | 7 | 83,185      | 2,483,135   | 3 | 0 | 3 | 1 |
| Case 73 | 7 | 2,486,004   | 3,117,874   | 4 | 0 | 4 | 1 |
| Case 73 | 7 | 3,119,823   | 3,385,384   | 5 | 0 | 5 | 1 |
| Case 73 | 7 | 3,390,013   | 7,484,105   | 4 | 0 | 4 | 1 |
| Case 73 | 7 | 7,488,601   | 7,664,696   | 5 | 0 | 5 | 1 |
| Case 73 | 7 | 7,668,666   | 7,848,087   | 4 | 0 | 4 | 1 |
| Case 73 | 7 | 7,848,912   | 8,019,934   | 5 | 0 | 5 | 1 |
| Case 73 | 7 | 8,021,570   | 8,522,345   | 4 | 0 | 4 | 1 |
| Case 73 | 7 | 8,527,231   | 11,576,964  | 5 | 0 | 5 | 1 |
| Case 73 | 7 | 11,577,625  | 11,676,390  | 4 | 0 | 4 | 1 |
| Case 73 | 7 | 11,676,694  | 13,237,848  | 5 | 0 | 5 | 1 |
| Case 73 | 7 | 13,238,496  | 13,238,496  | 4 | 0 | 4 | 1 |
| Case 73 | 7 | 13,248,712  | 13,300,179  | 3 | 0 | 3 | 1 |
| Case 73 | 7 | 13,302,054  | 13,305,542  | 4 | 0 | 4 | 1 |
| Case 73 | 7 | 13,306,966  | 19,070,165  | 5 | 0 | 5 | 1 |
| Case 73 | 7 | 19,070,930  | 33,102,322  | 4 | 0 | 4 | 1 |
| Case 73 | 7 | 33,127,539  | 33,763,583  | 5 | 0 | 5 | 1 |
| Case 73 | 7 | 33,765,010  | 34,412,689  | 4 | 0 | 4 | 1 |
| Case 73 | 7 | 34,416,608  | 34,661,743  | 5 | 0 | 5 | 1 |



|         |   |             |             |   |   |   |   |
|---------|---|-------------|-------------|---|---|---|---|
| Case 73 | 7 | 34,661,834  | 37,144,095  | 4 | 0 | 4 | 1 |
| Case 73 | 7 | 37,157,641  | 38,417,556  | 5 | 0 | 5 | 1 |
| Case 73 | 7 | 38,420,184  | 40,940,977  | 4 | 0 | 4 | 1 |
| Case 73 | 7 | 40,944,385  | 41,306,172  | 5 | 0 | 5 | 1 |
| Case 73 | 7 | 41,308,698  | 48,627,470  | 4 | 0 | 4 | 1 |
| Case 73 | 7 | 48,627,660  | 50,324,652  | 5 | 0 | 5 | 1 |
| Case 73 | 7 | 50,325,717  | 54,711,923  | 4 | 0 | 4 | 1 |
| Case 73 | 7 | 54,715,735  | 55,095,197  | 5 | 0 | 5 | 1 |
| Case 73 | 7 | 55,112,827  | 58,019,061  | 4 | 0 | 4 | 1 |
| Case 73 | 7 | 61,056,053  | 62,113,011  | 4 | 0 | 4 | 1 |
| Case 73 | 7 | 62,140,786  | 62,534,685  | 3 | 0 | 3 | 1 |
| Case 73 | 7 | 62,561,412  | 68,544,052  | 4 | 0 | 4 | 1 |
| Case 73 | 7 | 68,548,693  | 71,366,745  | 3 | 0 | 3 | 1 |
| Case 73 | 7 | 71,383,683  | 78,407,722  | 3 | 1 | 4 | 0 |
| Case 73 | 7 | 78,416,056  | 80,653,027  | 3 | 0 | 3 | 1 |
| Case 73 | 7 | 80,654,259  | 81,060,188  | 4 | 0 | 4 | 1 |
| Case 73 | 7 | 81,070,971  | 82,136,552  | 3 | 0 | 3 | 1 |
| Case 73 | 7 | 82,137,236  | 82,204,878  | 4 | 0 | 4 | 1 |
| Case 73 | 7 | 82,206,178  | 86,019,034  | 3 | 0 | 3 | 1 |
| Case 73 | 7 | 86,036,570  | 88,962,700  | 3 | 2 | 5 | 0 |
| Case 73 | 7 | 88,962,827  | 88,966,204  | 2 | 2 | 4 | 0 |
| Case 73 | 7 | 88,969,883  | 92,728,798  | 3 | 2 | 5 | 0 |
| Case 73 | 7 | 92,730,328  | 93,083,708  | 2 | 2 | 4 | 0 |
| Case 73 | 7 | 93,090,133  | 95,473,956  | 3 | 2 | 5 | 0 |
| Case 73 | 7 | 95,484,290  | 100,675,959 | 3 | 0 | 3 | 1 |
| Case 73 | 7 | 100,675,976 | 100,685,742 | 2 | 0 | 2 | 1 |
| Case 73 | 7 | 100,685,760 | 110,526,722 | 3 | 0 | 3 | 1 |
| Case 73 | 7 | 110,543,241 | 110,548,594 | 1 | 0 | 1 | 0 |
| Case 73 | 7 | 110,559,571 | 110,603,427 | 0 | 0 | 0 | 0 |
| Case 73 | 7 | 110,611,438 | 147,533,267 | 3 | 0 | 3 | 1 |
| Case 73 | 7 | 147,534,006 | 147,759,461 | 2 | 0 | 2 | 1 |
| Case 73 | 7 | 147,770,563 | 148,143,416 | 3 | 0 | 3 | 1 |
| Case 73 | 7 | 148,153,437 | 148,409,941 | 2 | 0 | 2 | 1 |
| Case 73 | 7 | 148,419,066 | 148,463,860 | 1 | 0 | 1 | 0 |
| Case 73 | 7 | 148,467,447 | 150,747,594 | 2 | 0 | 2 | 1 |
| Case 73 | 7 | 150,747,746 | 150,752,608 | 3 | 0 | 3 | 1 |
| Case 73 | 7 | 150,753,261 | 151,426,105 | 2 | 0 | 2 | 1 |
| Case 73 | 7 | 151,430,709 | 151,660,102 | 3 | 0 | 3 | 1 |
| Case 73 | 7 | 151,660,298 | 152,600,817 | 2 | 0 | 2 | 1 |
| Case 73 | 7 | 152,601,631 | 152,607,732 | 0 | 0 | 0 | 0 |
| Case 73 | 7 | 152,620,372 | 152,648,941 | 3 | 0 | 3 | 1 |
| Case 73 | 7 | 152,653,503 | 155,306,750 | 2 | 0 | 2 | 1 |
| Case 73 | 7 | 155,308,238 | 156,033,299 | 3 | 0 | 3 | 1 |
| Case 73 | 7 | 156,037,171 | 156,135,272 | 2 | 0 | 2 | 1 |
| Case 73 | 7 | 156,135,838 | 156,368,530 | 3 | 0 | 3 | 1 |
| Case 73 | 7 | 156,371,216 | 159,119,486 | 2 | 0 | 2 | 1 |
| Case 73 | 8 | 164,984     | 191,226     | 1 | 0 | 1 | 0 |
| Case 73 | 8 | 193,756     | 209,152     | 0 | 0 | 0 | 0 |
| Case 73 | 8 | 212,498     | 223,682     | 1 | 0 | 1 | 0 |
| Case 73 | 8 | 224,666     | 294,150     | 0 | 0 | 0 | 0 |
| Case 73 | 8 | 296,848     | 304,569     | 1 | 0 | 1 | 0 |
| Case 73 | 8 | 307,738     | 577,101     | 0 | 0 | 0 | 0 |
| Case 73 | 8 | 578,742     | 606,696     | 1 | 0 | 1 | 0 |
| Case 73 | 8 | 607,251     | 614,389     | 0 | 0 | 0 | 0 |
| Case 73 | 8 | 615,117     | 618,675     | 1 | 0 | 1 | 0 |
| Case 73 | 8 | 618,700     | 622,781     | 0 | 0 | 0 | 0 |
| Case 73 | 8 | 623,348     | 623,748     | 1 | 0 | 1 | 0 |
| Case 73 | 8 | 623,805     | 642,586     | 0 | 0 | 0 | 0 |
| Case 73 | 8 | 642,842     | 719,043     | 1 | 0 | 1 | 0 |
| Case 73 | 8 | 720,491     | 749,998     | 0 | 0 | 0 | 0 |
| Case 73 | 8 | 750,278     | 758,066     | 1 | 0 | 1 | 0 |

|         |   |           |            |   |   |   |   |
|---------|---|-----------|------------|---|---|---|---|
| Case 73 | 8 | 769,589   | 876,546    | 0 | 0 | 0 | 0 |
| Case 73 | 8 | 877,433   | 1,024,476  | 1 | 0 | 1 | 0 |
| Case 73 | 8 | 1,027,787 | 1,083,364  | 0 | 0 | 0 | 0 |
| Case 73 | 8 | 1,086,161 | 1,164,482  | 1 | 0 | 1 | 0 |
| Case 73 | 8 | 1,165,148 | 1,240,819  | 0 | 0 | 0 | 0 |
| Case 73 | 8 | 1,241,224 | 1,282,530  | 1 | 0 | 1 | 0 |
| Case 73 | 8 | 1,282,843 | 1,292,488  | 0 | 0 | 0 | 0 |
| Case 73 | 8 | 1,293,061 | 1,306,071  | 1 | 0 | 1 | 0 |
| Case 73 | 8 | 1,308,026 | 1,318,693  | 0 | 0 | 0 | 0 |
| Case 73 | 8 | 1,319,724 | 1,356,333  | 1 | 0 | 1 | 0 |
| Case 73 | 8 | 1,359,156 | 1,445,874  | 0 | 0 | 0 | 0 |
| Case 73 | 8 | 1,446,009 | 1,486,112  | 1 | 0 | 1 | 0 |
| Case 73 | 8 | 1,489,033 | 1,566,505  | 0 | 0 | 0 | 0 |
| Case 73 | 8 | 1,567,920 | 1,616,725  | 1 | 0 | 1 | 0 |
| Case 73 | 8 | 1,616,743 | 1,676,789  | 0 | 0 | 0 | 0 |
| Case 73 | 8 | 1,678,019 | 1,791,433  | 1 | 0 | 1 | 0 |
| Case 73 | 8 | 1,794,023 | 1,807,756  | 0 | 0 | 0 | 0 |
| Case 73 | 8 | 1,808,162 | 1,842,737  | 1 | 0 | 1 | 0 |
| Case 73 | 8 | 1,843,091 | 1,905,823  | 0 | 0 | 0 | 0 |
| Case 73 | 8 | 1,906,630 | 1,949,126  | 1 | 0 | 1 | 0 |
| Case 73 | 8 | 1,950,761 | 1,954,464  | 0 | 0 | 0 | 0 |
| Case 73 | 8 | 1,954,812 | 1,969,726  | 1 | 0 | 1 | 0 |
| Case 73 | 8 | 1,975,962 | 1,991,921  | 0 | 0 | 0 | 0 |
| Case 73 | 8 | 1,992,937 | 2,033,415  | 1 | 0 | 1 | 0 |
| Case 73 | 8 | 2,033,432 | 2,037,281  | 0 | 0 | 0 | 0 |
| Case 73 | 8 | 2,037,874 | 2,048,831  | 1 | 0 | 1 | 0 |
| Case 73 | 8 | 2,050,240 | 2,050,596  | 0 | 0 | 0 | 0 |
| Case 73 | 8 | 2,052,656 | 2,061,497  | 1 | 0 | 1 | 0 |
| Case 73 | 8 | 2,063,158 | 2,080,289  | 0 | 0 | 0 | 0 |
| Case 73 | 8 | 2,086,493 | 2,097,007  | 1 | 0 | 1 | 0 |
| Case 73 | 8 | 2,097,247 | 2,111,830  | 0 | 0 | 0 | 0 |
| Case 73 | 8 | 2,112,041 | 2,123,109  | 1 | 0 | 1 | 0 |
| Case 73 | 8 | 2,123,694 | 2,128,786  | 0 | 0 | 0 | 0 |
| Case 73 | 8 | 2,129,547 | 2,143,681  | 1 | 0 | 1 | 0 |
| Case 73 | 8 | 2,143,792 | 2,164,581  | 0 | 0 | 0 | 0 |
| Case 73 | 8 | 2,164,712 | 2,275,178  | 1 | 0 | 1 | 0 |
| Case 73 | 8 | 2,289,839 | 2,540,711  | 0 | 0 | 0 | 0 |
| Case 73 | 8 | 2,542,045 | 2,549,380  | 1 | 0 | 1 | 0 |
| Case 73 | 8 | 2,552,402 | 2,664,858  | 0 | 0 | 0 | 0 |
| Case 73 | 8 | 2,667,474 | 2,703,064  | 1 | 0 | 1 | 0 |
| Case 73 | 8 | 2,704,193 | 2,747,940  | 0 | 0 | 0 | 0 |
| Case 73 | 8 | 2,748,821 | 2,757,991  | 1 | 0 | 1 | 0 |
| Case 73 | 8 | 2,759,300 | 2,924,238  | 0 | 0 | 0 | 0 |
| Case 73 | 8 | 2,924,429 | 2,936,461  | 1 | 0 | 1 | 0 |
| Case 73 | 8 | 2,941,053 | 2,965,318  | 0 | 0 | 0 | 0 |
| Case 73 | 8 | 2,966,126 | 2,970,539  | 1 | 0 | 1 | 0 |
| Case 73 | 8 | 2,971,213 | 2,995,761  | 0 | 0 | 0 | 0 |
| Case 73 | 8 | 2,996,012 | 3,021,495  | 1 | 0 | 1 | 0 |
| Case 73 | 8 | 3,024,326 | 3,141,447  | 0 | 0 | 0 | 0 |
| Case 73 | 8 | 3,141,695 | 3,160,221  | 1 | 0 | 1 | 0 |
| Case 73 | 8 | 3,161,242 | 3,165,207  | 0 | 0 | 0 | 0 |
| Case 73 | 8 | 3,165,277 | 3,168,573  | 1 | 0 | 1 | 0 |
| Case 73 | 8 | 3,172,225 | 3,316,475  | 0 | 0 | 0 | 0 |
| Case 73 | 8 | 3,316,914 | 3,319,331  | 1 | 0 | 1 | 0 |
| Case 73 | 8 | 3,319,748 | 3,350,962  | 0 | 0 | 0 | 0 |
| Case 73 | 8 | 3,351,147 | 3,361,471  | 1 | 0 | 1 | 0 |
| Case 73 | 8 | 3,363,444 | 3,502,239  | 0 | 0 | 0 | 0 |
| Case 73 | 8 | 3,502,719 | 3,504,117  | 1 | 0 | 1 | 0 |
| Case 73 | 8 | 3,505,575 | 3,516,984  | 0 | 0 | 0 | 0 |
| Case 73 | 8 | 3,517,336 | 3,521,949  | 1 | 0 | 1 | 0 |
| Case 73 | 8 | 3,523,100 | 10,468,172 | 3 | 0 | 3 | 1 |

|         |   |             |             |   |   |   |   |
|---------|---|-------------|-------------|---|---|---|---|
| Case 73 | 8 | 10,468,310  | 10,470,805  | 2 | 0 | 2 | 1 |
| Case 73 | 8 | 10,470,915  | 14,950,895  | 3 | 0 | 3 | 1 |
| Case 73 | 8 | 14,951,436  | 14,951,436  | 2 | 0 | 2 | 1 |
| Case 73 | 8 | 14,951,943  | 14,979,482  | 0 | 0 | 0 | 0 |
| Case 73 | 8 | 14,981,439  | 43,791,691  | 3 | 0 | 3 | 1 |
| Case 73 | 8 | 46,886,735  | 61,590,175  | 3 | 2 | 5 | 0 |
| Case 73 | 8 | 61,597,447  | 61,775,182  | 2 | 2 | 4 | 0 |
| Case 73 | 8 | 61,777,937  | 73,185,998  | 3 | 2 | 5 | 0 |
| Case 73 | 8 | 73,193,532  | 73,587,678  | 4 | 2 | 6 | 0 |
| Case 73 | 8 | 73,588,474  | 74,397,713  | 3 | 2 | 5 | 0 |
| Case 73 | 8 | 74,402,277  | 75,143,753  | 4 | 2 | 6 | 0 |
| Case 73 | 8 | 75,145,770  | 83,590,728  | 3 | 2 | 5 | 0 |
| Case 73 | 8 | 83,591,879  | 86,099,701  | 4 | 2 | 6 | 0 |
| Case 73 | 8 | 86,099,942  | 90,078,197  | 3 | 2 | 5 | 0 |
| Case 73 | 8 | 90,087,094  | 90,488,877  | 3 | 1 | 4 | 0 |
| Case 73 | 8 | 90,490,180  | 91,305,844  | 3 | 2 | 5 | 0 |
| Case 73 | 8 | 91,308,566  | 96,852,520  | 2 | 2 | 4 | 0 |
| Case 73 | 8 | 96,853,415  | 96,864,355  | 3 | 1 | 4 | 0 |
| Case 73 | 8 | 96,870,639  | 97,285,617  | 5 | 2 | 7 | 0 |
| Case 73 | 8 | 97,285,816  | 97,295,677  | 3 | 1 | 4 | 0 |
| Case 73 | 8 | 97,307,326  | 97,376,980  | 4 | 1 | 5 | 0 |
| Case 73 | 8 | 97,384,973  | 99,133,678  | 5 | 1 | 6 | 0 |
| Case 73 | 8 | 99,135,575  | 99,153,088  | 4 | 1 | 5 | 0 |
| Case 73 | 8 | 99,153,160  | 99,153,160  | 3 | 1 | 4 | 0 |
| Case 73 | 8 | 99,154,285  | 101,620,541 | 5 | 2 | 7 | 0 |
| Case 73 | 8 | 101,620,743 | 101,620,783 | 3 | 1 | 4 | 0 |
| Case 73 | 8 | 101,624,235 | 102,595,267 | 4 | 2 | 6 | 0 |
| Case 73 | 8 | 102,595,587 | 102,596,210 | 3 | 2 | 5 | 0 |
| Case 73 | 8 | 102,599,384 | 103,532,303 | 5 | 2 | 7 | 0 |
| Case 73 | 8 | 103,534,797 | 103,553,857 | 3 | 1 | 4 | 0 |
| Case 73 | 8 | 103,555,913 | 103,791,669 | 4 | 2 | 6 | 0 |
| Case 73 | 8 | 103,793,370 | 103,794,864 | 3 | 2 | 5 | 0 |
| Case 73 | 8 | 103,798,301 | 104,425,304 | 5 | 2 | 7 | 0 |
| Case 73 | 8 | 104,427,354 | 104,432,617 | 3 | 1 | 4 | 0 |
| Case 73 | 8 | 104,432,659 | 104,882,403 | 5 | 2 | 7 | 0 |
| Case 73 | 8 | 104,897,539 | 104,898,337 | 3 | 1 | 4 | 0 |
| Case 73 | 8 | 104,901,578 | 105,359,432 | 5 | 2 | 7 | 0 |
| Case 73 | 8 | 105,360,898 | 105,361,091 | 3 | 1 | 4 | 0 |
| Case 73 | 8 | 105,361,354 | 105,792,850 | 4 | 2 | 6 | 0 |
| Case 73 | 8 | 105,796,187 | 105,796,187 | 3 | 2 | 5 | 0 |
| Case 73 | 8 | 105,797,936 | 107,511,933 | 5 | 2 | 7 | 0 |
| Case 73 | 8 | 107,515,351 | 120,592,815 | 4 | 2 | 6 | 0 |
| Case 73 | 8 | 120,594,780 | 120,634,022 | 3 | 2 | 5 | 0 |
| Case 73 | 8 | 120,636,850 | 120,658,757 | 3 | 3 | 6 | 0 |
| Case 73 | 8 | 120,658,845 | 120,679,258 | 3 | 2 | 5 | 0 |
| Case 73 | 8 | 120,679,572 | 121,852,680 | 3 | 3 | 6 | 0 |
| Case 73 | 8 | 121,853,405 | 123,830,795 | 4 | 2 | 6 | 0 |
| Case 73 | 8 | 123,834,815 | 123,965,893 | 3 | 2 | 5 | 0 |
| Case 73 | 8 | 123,966,052 | 124,238,872 | 4 | 1 | 5 | 0 |
| Case 73 | 8 | 124,241,342 | 124,440,235 | 5 | 1 | 6 | 0 |
| Case 73 | 8 | 124,440,260 | 126,765,322 | 4 | 1 | 5 | 0 |
| Case 73 | 8 | 126,765,996 | 130,572,110 | 4 | 2 | 6 | 0 |
| Case 73 | 8 | 130,572,304 | 130,586,355 | 3 | 2 | 5 | 0 |
| Case 73 | 8 | 130,587,932 | 131,695,518 | 4 | 1 | 5 | 0 |
| Case 73 | 8 | 131,696,746 | 131,696,746 | 3 | 1 | 4 | 0 |
| Case 73 | 8 | 131,697,816 | 133,036,745 | 4 | 2 | 6 | 0 |
| Case 73 | 8 | 133,036,775 | 133,174,006 | 3 | 2 | 5 | 0 |
| Case 73 | 8 | 133,175,736 | 133,854,970 | 4 | 2 | 6 | 0 |
| Case 73 | 8 | 133,855,035 | 134,296,524 | 3 | 2 | 5 | 0 |
| Case 73 | 8 | 134,298,492 | 135,288,668 | 4 | 2 | 6 | 0 |
| Case 73 | 8 | 135,290,290 | 135,676,891 | 3 | 2 | 5 | 0 |

|         |   |             |             |   |   |   |   |
|---------|---|-------------|-------------|---|---|---|---|
| Case 73 | 8 | 135,678,804 | 136,192,644 | 4 | 2 | 6 | 0 |
| Case 73 | 8 | 136,193,650 | 136,500,554 | 3 | 2 | 5 | 0 |
| Case 73 | 8 | 136,522,558 | 139,117,698 | 4 | 2 | 6 | 0 |
| Case 73 | 8 | 139,123,897 | 139,951,715 | 3 | 2 | 5 | 0 |
| Case 73 | 8 | 139,954,311 | 140,343,359 | 4 | 2 | 6 | 0 |
| Case 73 | 8 | 140,345,034 | 140,801,720 | 3 | 2 | 5 | 0 |
| Case 73 | 8 | 140,805,932 | 140,819,035 | 4 | 2 | 6 | 0 |
| Case 73 | 8 | 140,819,819 | 140,986,842 | 4 | 1 | 5 | 0 |
| Case 73 | 8 | 140,989,919 | 140,989,919 | 3 | 2 | 5 | 0 |
| Case 73 | 8 | 140,990,501 | 140,990,501 | 3 | 1 | 4 | 0 |
| Case 73 | 8 | 140,990,677 | 144,654,303 | 3 | 2 | 5 | 0 |
| Case 73 | 8 | 144,654,594 | 144,685,178 | 4 | 2 | 6 | 0 |
| Case 73 | 8 | 144,686,512 | 144,803,531 | 3 | 2 | 5 | 0 |
| Case 73 | 8 | 144,803,727 | 144,928,660 | 3 | 3 | 6 | 0 |
| Case 73 | 8 | 144,929,811 | 144,943,196 | 3 | 1 | 4 | 0 |
| Case 73 | 8 | 144,943,223 | 144,990,840 | 5 | 2 | 7 | 0 |
| Case 73 | 8 | 144,990,878 | 144,991,972 | 3 | 1 | 4 | 0 |
| Case 73 | 8 | 144,992,103 | 144,992,953 | 5 | 2 | 7 | 0 |
| Case 73 | 8 | 144,992,962 | 144,993,530 | 3 | 1 | 4 | 0 |
| Case 73 | 8 | 144,993,793 | 145,086,616 | 4 | 2 | 6 | 0 |
| Case 73 | 8 | 145,086,736 | 145,160,983 | 3 | 2 | 5 | 0 |
| Case 73 | 8 | 145,161,803 | 145,682,115 | 4 | 2 | 6 | 0 |
| Case 73 | 8 | 145,687,475 | 146,293,414 | 3 | 2 | 5 | 0 |
| Case 73 | 9 | 46,587      | 4,972,398   | 2 | 0 | 2 | 1 |
| Case 73 | 9 | 4,974,441   | 5,081,585   | 1 | 0 | 1 | 0 |
| Case 73 | 9 | 5,081,780   | 6,986,190   | 2 | 0 | 2 | 1 |
| Case 73 | 9 | 6,986,365   | 6,990,510   | 1 | 0 | 1 | 0 |
| Case 73 | 9 | 6,993,811   | 8,794,314   | 2 | 0 | 2 | 1 |
| Case 73 | 9 | 8,794,775   | 8,832,038   | 1 | 0 | 1 | 0 |
| Case 73 | 9 | 8,840,840   | 9,184,911   | 2 | 0 | 2 | 1 |
| Case 73 | 9 | 9,186,346   | 9,197,160   | 1 | 0 | 1 | 0 |
| Case 73 | 9 | 9,197,298   | 9,287,321   | 2 | 0 | 2 | 1 |
| Case 73 | 9 | 9,287,406   | 9,349,832   | 1 | 0 | 1 | 0 |
| Case 73 | 9 | 9,350,608   | 9,442,794   | 2 | 0 | 2 | 1 |
| Case 73 | 9 | 9,443,985   | 9,526,811   | 0 | 0 | 0 | 0 |
| Case 73 | 9 | 9,530,755   | 9,647,916   | 1 | 0 | 1 | 0 |
| Case 73 | 9 | 9,649,668   | 9,800,624   | 2 | 0 | 2 | 1 |
| Case 73 | 9 | 9,801,153   | 9,829,254   | 1 | 0 | 1 | 0 |
| Case 73 | 9 | 9,830,675   | 9,908,722   | 2 | 0 | 2 | 1 |
| Case 73 | 9 | 9,908,821   | 9,914,428   | 1 | 0 | 1 | 0 |
| Case 73 | 9 | 9,915,186   | 9,961,522   | 2 | 0 | 2 | 1 |
| Case 73 | 9 | 9,962,204   | 10,107,399  | 1 | 0 | 1 | 0 |
| Case 73 | 9 | 10,112,766  | 10,214,007  | 2 | 0 | 2 | 1 |
| Case 73 | 9 | 10,215,130  | 10,311,000  | 1 | 0 | 1 | 0 |
| Case 73 | 9 | 10,315,193  | 10,348,659  | 2 | 0 | 2 | 1 |
| Case 73 | 9 | 10,352,639  | 10,362,315  | 1 | 0 | 1 | 0 |
| Case 73 | 9 | 10,364,655  | 10,473,380  | 2 | 0 | 2 | 1 |
| Case 73 | 9 | 10,478,387  | 10,506,167  | 1 | 0 | 1 | 0 |
| Case 73 | 9 | 10,509,682  | 11,649,257  | 2 | 0 | 2 | 1 |
| Case 73 | 9 | 11,656,743  | 11,753,695  | 1 | 0 | 1 | 0 |
| Case 73 | 9 | 11,759,484  | 12,095,022  | 2 | 0 | 2 | 1 |
| Case 73 | 9 | 12,098,000  | 12,272,744  | 1 | 0 | 1 | 0 |
| Case 73 | 9 | 12,275,924  | 12,657,603  | 2 | 0 | 2 | 1 |
| Case 73 | 9 | 12,658,470  | 12,683,639  | 1 | 0 | 1 | 0 |
| Case 73 | 9 | 12,687,872  | 13,158,062  | 2 | 0 | 2 | 1 |
| Case 73 | 9 | 13,158,958  | 13,176,152  | 1 | 0 | 1 | 0 |
| Case 73 | 9 | 13,176,248  | 14,648,118  | 2 | 0 | 2 | 1 |
| Case 73 | 9 | 14,649,728  | 14,676,870  | 1 | 0 | 1 | 0 |
| Case 73 | 9 | 14,677,538  | 14,833,003  | 2 | 0 | 2 | 1 |
| Case 73 | 9 | 14,833,488  | 14,835,081  | 1 | 0 | 1 | 0 |
| Case 73 | 9 | 14,838,860  | 15,585,395  | 2 | 0 | 2 | 1 |

|         |   |            |            |   |   |   |   |
|---------|---|------------|------------|---|---|---|---|
| Case 73 | 9 | 15,591,372 | 15,777,823 | 1 | 0 | 1 | 0 |
| Case 73 | 9 | 15,779,143 | 17,190,094 | 2 | 0 | 2 | 1 |
| Case 73 | 9 | 17,208,589 | 17,388,195 | 1 | 0 | 1 | 0 |
| Case 73 | 9 | 17,391,531 | 17,404,464 | 2 | 0 | 2 | 1 |
| Case 73 | 9 | 17,409,391 | 17,502,205 | 1 | 0 | 1 | 0 |
| Case 73 | 9 | 17,503,073 | 17,635,712 | 2 | 0 | 2 | 1 |
| Case 73 | 9 | 17,637,196 | 17,657,363 | 1 | 0 | 1 | 0 |
| Case 73 | 9 | 17,662,411 | 18,023,123 | 2 | 0 | 2 | 1 |
| Case 73 | 9 | 18,023,764 | 18,061,140 | 1 | 0 | 1 | 0 |
| Case 73 | 9 | 18,066,074 | 18,527,831 | 2 | 0 | 2 | 1 |
| Case 73 | 9 | 18,528,775 | 18,533,731 | 1 | 0 | 1 | 0 |
| Case 73 | 9 | 18,537,444 | 18,653,773 | 2 | 0 | 2 | 1 |
| Case 73 | 9 | 18,655,961 | 18,664,420 | 1 | 0 | 1 | 0 |
| Case 73 | 9 | 18,666,780 | 20,801,654 | 2 | 0 | 2 | 1 |
| Case 73 | 9 | 20,811,421 | 20,866,934 | 1 | 0 | 1 | 0 |
| Case 73 | 9 | 20,866,982 | 20,981,542 | 2 | 0 | 2 | 1 |
| Case 73 | 9 | 20,981,684 | 21,080,518 | 1 | 0 | 1 | 0 |
| Case 73 | 9 | 21,082,814 | 22,648,562 | 2 | 0 | 2 | 1 |
| Case 73 | 9 | 22,652,491 | 22,811,336 | 1 | 0 | 1 | 0 |
| Case 73 | 9 | 22,818,289 | 22,894,794 | 2 | 0 | 2 | 1 |
| Case 73 | 9 | 22,901,504 | 22,966,185 | 1 | 0 | 1 | 0 |
| Case 73 | 9 | 22,967,726 | 23,081,217 | 2 | 0 | 2 | 1 |
| Case 73 | 9 | 23,081,882 | 23,103,266 | 1 | 0 | 1 | 0 |
| Case 73 | 9 | 23,117,288 | 23,254,622 | 2 | 0 | 2 | 1 |
| Case 73 | 9 | 23,259,295 | 23,322,467 | 1 | 0 | 1 | 0 |
| Case 73 | 9 | 23,325,027 | 23,670,123 | 2 | 0 | 2 | 1 |
| Case 73 | 9 | 23,676,631 | 23,887,854 | 3 | 1 | 4 | 0 |
| Case 73 | 9 | 23,889,347 | 25,377,010 | 2 | 1 | 3 | 0 |
| Case 73 | 9 | 25,378,030 | 27,151,706 | 1 | 1 | 2 | 0 |
| Case 73 | 9 | 27,152,292 | 27,289,812 | 2 | 1 | 3 | 0 |
| Case 73 | 9 | 27,290,984 | 27,575,785 | 1 | 1 | 2 | 0 |
| Case 73 | 9 | 27,579,560 | 28,007,239 | 2 | 1 | 3 | 0 |
| Case 73 | 9 | 28,011,383 | 30,698,142 | 1 | 1 | 2 | 0 |
| Case 73 | 9 | 30,713,637 | 31,101,278 | 3 | 1 | 4 | 0 |
| Case 73 | 9 | 31,102,874 | 31,102,874 | 2 | 1 | 3 | 0 |
| Case 73 | 9 | 31,104,948 | 32,431,306 | 1 | 1 | 2 | 0 |
| Case 73 | 9 | 32,431,728 | 32,453,278 | 2 | 1 | 3 | 0 |
| Case 73 | 9 | 32,455,262 | 32,618,885 | 1 | 1 | 2 | 0 |
| Case 73 | 9 | 32,619,211 | 36,099,871 | 2 | 1 | 3 | 0 |
| Case 73 | 9 | 36,100,388 | 36,693,098 | 1 | 1 | 2 | 0 |
| Case 73 | 9 | 36,697,735 | 37,036,285 | 2 | 1 | 3 | 0 |
| Case 73 | 9 | 37,038,258 | 37,302,155 | 1 | 1 | 2 | 0 |
| Case 73 | 9 | 37,302,186 | 37,638,744 | 2 | 1 | 3 | 0 |
| Case 73 | 9 | 37,638,972 | 37,874,090 | 1 | 1 | 2 | 0 |
| Case 73 | 9 | 37,886,429 | 38,531,889 | 2 | 1 | 3 | 0 |
| Case 73 | 9 | 38,533,004 | 38,636,463 | 1 | 1 | 2 | 0 |
| Case 73 | 9 | 38,639,318 | 38,700,361 | 2 | 1 | 3 | 0 |
| Case 73 | 9 | 38,704,570 | 39,004,140 | 1 | 1 | 2 | 0 |
| Case 73 | 9 | 39,076,028 | 46,944,322 | 2 | 1 | 3 | 0 |
| Case 73 | 9 | 65,629,772 | 72,833,511 | 2 | 1 | 3 | 0 |
| Case 73 | 9 | 72,840,691 | 72,897,440 | 1 | 0 | 1 | 0 |
| Case 73 | 9 | 72,897,441 | 75,231,217 | 2 | 1 | 3 | 0 |
| Case 73 | 9 | 75,231,370 | 76,321,504 | 1 | 1 | 2 | 0 |
| Case 73 | 9 | 76,321,671 | 76,392,885 | 2 | 1 | 3 | 0 |
| Case 73 | 9 | 76,397,650 | 78,163,305 | 1 | 1 | 2 | 0 |
| Case 73 | 9 | 78,165,213 | 78,259,163 | 2 | 1 | 3 | 0 |
| Case 73 | 9 | 78,259,536 | 78,407,484 | 1 | 1 | 2 | 0 |
| Case 73 | 9 | 78,412,423 | 78,792,438 | 2 | 1 | 3 | 0 |
| Case 73 | 9 | 78,793,274 | 78,815,368 | 1 | 1 | 2 | 0 |
| Case 73 | 9 | 78,816,016 | 79,282,589 | 2 | 1 | 3 | 0 |
| Case 73 | 9 | 79,292,138 | 79,322,921 | 1 | 1 | 2 | 0 |

|         |   |             |             |   |   |   |   |
|---------|---|-------------|-------------|---|---|---|---|
| Case 73 | 9 | 79,323,154  | 79,700,008  | 2 | 1 | 3 | 0 |
| Case 73 | 9 | 79,702,675  | 80,004,213  | 1 | 1 | 2 | 0 |
| Case 73 | 9 | 80,010,025  | 80,742,806  | 2 | 1 | 3 | 0 |
| Case 73 | 9 | 80,746,139  | 80,901,335  | 1 | 1 | 2 | 0 |
| Case 73 | 9 | 80,906,946  | 81,111,931  | 2 | 1 | 3 | 0 |
| Case 73 | 9 | 81,116,860  | 81,442,685  | 1 | 1 | 2 | 0 |
| Case 73 | 9 | 81,443,855  | 81,692,440  | 2 | 1 | 3 | 0 |
| Case 73 | 9 | 81,692,943  | 82,282,697  | 1 | 1 | 2 | 0 |
| Case 73 | 9 | 82,298,288  | 82,439,058  | 2 | 1 | 3 | 0 |
| Case 73 | 9 | 82,443,844  | 83,643,525  | 1 | 1 | 2 | 0 |
| Case 73 | 9 | 83,651,543  | 83,928,428  | 2 | 1 | 3 | 0 |
| Case 73 | 9 | 83,928,740  | 84,197,169  | 1 | 1 | 2 | 0 |
| Case 73 | 9 | 84,200,531  | 84,444,308  | 2 | 1 | 3 | 0 |
| Case 73 | 9 | 84,445,182  | 85,332,687  | 1 | 1 | 2 | 0 |
| Case 73 | 9 | 85,338,256  | 85,430,642  | 2 | 1 | 3 | 0 |
| Case 73 | 9 | 85,432,032  | 85,781,109  | 1 | 1 | 2 | 0 |
| Case 73 | 9 | 85,781,504  | 86,229,249  | 2 | 1 | 3 | 0 |
| Case 73 | 9 | 86,231,370  | 86,789,462  | 1 | 1 | 2 | 0 |
| Case 73 | 9 | 86,791,333  | 86,963,524  | 2 | 1 | 3 | 0 |
| Case 73 | 9 | 86,963,692  | 88,017,606  | 1 | 1 | 2 | 0 |
| Case 73 | 9 | 88,018,061  | 88,104,161  | 2 | 1 | 3 | 0 |
| Case 73 | 9 | 88,105,301  | 88,661,440  | 1 | 1 | 2 | 0 |
| Case 73 | 9 | 88,661,453  | 88,709,573  | 2 | 1 | 3 | 0 |
| Case 73 | 9 | 88,715,004  | 88,960,026  | 3 | 1 | 4 | 0 |
| Case 73 | 9 | 88,961,237  | 89,951,915  | 2 | 1 | 3 | 0 |
| Case 73 | 9 | 89,954,522  | 90,098,265  | 1 | 1 | 2 | 0 |
| Case 73 | 9 | 90,101,096  | 90,501,133  | 2 | 1 | 3 | 0 |
| Case 73 | 9 | 90,501,337  | 90,895,184  | 1 | 1 | 2 | 0 |
| Case 73 | 9 | 90,896,018  | 91,369,668  | 2 | 1 | 3 | 0 |
| Case 73 | 9 | 91,370,155  | 91,563,034  | 1 | 1 | 2 | 0 |
| Case 73 | 9 | 91,569,331  | 93,193,062  | 2 | 1 | 3 | 0 |
| Case 73 | 9 | 93,199,571  | 93,595,807  | 1 | 1 | 2 | 0 |
| Case 73 | 9 | 93,596,067  | 94,037,873  | 2 | 1 | 3 | 0 |
| Case 73 | 9 | 94,047,814  | 94,482,041  | 1 | 1 | 2 | 0 |
| Case 73 | 9 | 94,483,198  | 94,625,960  | 2 | 1 | 3 | 0 |
| Case 73 | 9 | 94,626,543  | 95,309,243  | 1 | 1 | 2 | 0 |
| Case 73 | 9 | 95,323,135  | 95,378,254  | 2 | 1 | 3 | 0 |
| Case 73 | 9 | 95,378,704  | 96,070,859  | 1 | 1 | 2 | 0 |
| Case 73 | 9 | 96,072,452  | 96,766,248  | 2 | 1 | 3 | 0 |
| Case 73 | 9 | 96,769,237  | 97,072,647  | 1 | 1 | 2 | 0 |
| Case 73 | 9 | 97,107,088  | 98,555,942  | 2 | 1 | 3 | 0 |
| Case 73 | 9 | 98,559,246  | 98,776,111  | 1 | 1 | 2 | 0 |
| Case 73 | 9 | 98,781,179  | 98,970,911  | 2 | 1 | 3 | 0 |
| Case 73 | 9 | 98,972,430  | 100,520,013 | 1 | 1 | 2 | 0 |
| Case 73 | 9 | 100,521,585 | 100,650,096 | 2 | 1 | 3 | 0 |
| Case 73 | 9 | 100,660,122 | 100,823,084 | 1 | 1 | 2 | 0 |
| Case 73 | 9 | 100,823,121 | 102,407,049 | 2 | 1 | 3 | 0 |
| Case 73 | 9 | 102,426,699 | 102,861,613 | 3 | 1 | 4 | 0 |
| Case 73 | 9 | 102,866,870 | 116,416,163 | 2 | 1 | 3 | 0 |
| Case 73 | 9 | 116,418,881 | 117,094,149 | 3 | 0 | 3 | 1 |
| Case 73 | 9 | 117,097,755 | 117,845,347 | 2 | 0 | 2 | 1 |
| Case 73 | 9 | 117,846,499 | 118,250,623 | 3 | 0 | 3 | 1 |
| Case 73 | 9 | 118,252,779 | 118,716,486 | 2 | 0 | 2 | 1 |
| Case 73 | 9 | 118,719,627 | 119,041,018 | 3 | 0 | 3 | 1 |
| Case 73 | 9 | 119,044,580 | 119,163,576 | 2 | 0 | 2 | 1 |
| Case 73 | 9 | 119,172,047 | 119,554,510 | 3 | 0 | 3 | 1 |
| Case 73 | 9 | 119,561,084 | 119,812,580 | 2 | 0 | 2 | 1 |
| Case 73 | 9 | 119,815,778 | 119,992,025 | 3 | 0 | 3 | 1 |
| Case 73 | 9 | 119,992,795 | 120,490,389 | 2 | 0 | 2 | 1 |
| Case 73 | 9 | 120,496,387 | 121,072,539 | 3 | 0 | 3 | 1 |
| Case 73 | 9 | 121,074,020 | 122,552,939 | 2 | 0 | 2 | 1 |

|         |    |             |             |   |   |   |   |
|---------|----|-------------|-------------|---|---|---|---|
| Case 73 | 9  | 122,556,173 | 123,156,591 | 3 | 0 | 3 | 1 |
| Case 73 | 9  | 123,156,790 | 124,128,354 | 2 | 0 | 2 | 1 |
| Case 73 | 9  | 124,131,512 | 132,759,808 | 3 | 0 | 3 | 1 |
| Case 73 | 9  | 132,766,685 | 132,853,218 | 2 | 0 | 2 | 1 |
| Case 73 | 9  | 132,854,659 | 132,912,150 | 3 | 0 | 3 | 1 |
| Case 73 | 9  | 132,914,712 | 133,367,704 | 2 | 0 | 2 | 1 |
| Case 73 | 9  | 133,370,298 | 133,501,778 | 3 | 0 | 3 | 1 |
| Case 73 | 9  | 133,506,083 | 133,593,939 | 2 | 0 | 2 | 1 |
| Case 73 | 9  | 133,595,219 | 141,066,491 | 3 | 0 | 3 | 1 |
| Case 73 | 10 | 98,087      | 1,934,824   | 4 | 0 | 4 | 1 |
| Case 73 | 10 | 1,942,800   | 2,120,407   | 5 | 0 | 5 | 1 |
| Case 73 | 10 | 2,125,211   | 2,372,763   | 4 | 0 | 4 | 1 |
| Case 73 | 10 | 2,373,295   | 6,342,123   | 3 | 0 | 3 | 1 |
| Case 73 | 10 | 6,342,636   | 6,430,767   | 4 | 0 | 4 | 1 |
| Case 73 | 10 | 6,431,340   | 29,364,393  | 3 | 0 | 3 | 1 |
| Case 73 | 10 | 29,364,697  | 29,580,933  | 4 | 0 | 4 | 1 |
| Case 73 | 10 | 29,581,998  | 39,097,912  | 3 | 0 | 3 | 1 |
| Case 73 | 10 | 42,436,301  | 42,467,126  | 3 | 0 | 3 | 1 |
| Case 73 | 10 | 42,478,452  | 44,104,513  | 4 | 0 | 4 | 1 |
| Case 73 | 10 | 44,105,044  | 48,324,245  | 3 | 0 | 3 | 1 |
| Case 73 | 10 | 48,326,282  | 49,698,113  | 2 | 0 | 2 | 1 |
| Case 73 | 10 | 49,699,957  | 49,911,737  | 3 | 0 | 3 | 1 |
| Case 73 | 10 | 49,917,865  | 50,740,827  | 2 | 0 | 2 | 1 |
| Case 73 | 10 | 50,757,504  | 50,873,067  | 3 | 0 | 3 | 1 |
| Case 73 | 10 | 50,874,028  | 51,110,279  | 2 | 0 | 2 | 1 |
| Case 73 | 10 | 51,503,335  | 52,201,167  | 3 | 0 | 3 | 1 |
| Case 73 | 10 | 52,207,073  | 52,617,538  | 2 | 0 | 2 | 1 |
| Case 73 | 10 | 52,623,433  | 53,242,283  | 1 | 0 | 1 | 0 |
| Case 73 | 10 | 53,242,703  | 53,245,152  | 0 | 0 | 0 | 0 |
| Case 73 | 10 | 53,246,751  | 54,864,975  | 1 | 0 | 1 | 0 |
| Case 73 | 10 | 54,865,321  | 54,911,808  | 0 | 0 | 0 | 0 |
| Case 73 | 10 | 54,914,951  | 55,333,463  | 1 | 0 | 1 | 0 |
| Case 73 | 10 | 55,333,926  | 55,338,875  | 0 | 0 | 0 | 0 |
| Case 73 | 10 | 55,346,502  | 56,989,733  | 1 | 0 | 1 | 0 |
| Case 73 | 10 | 56,993,816  | 57,014,652  | 0 | 0 | 0 | 0 |
| Case 73 | 10 | 57,018,033  | 58,067,127  | 1 | 0 | 1 | 0 |
| Case 73 | 10 | 58,074,938  | 58,117,124  | 0 | 0 | 0 | 0 |
| Case 73 | 10 | 58,118,339  | 59,392,443  | 1 | 0 | 1 | 0 |
| Case 73 | 10 | 59,392,718  | 59,410,897  | 0 | 0 | 0 | 0 |
| Case 73 | 10 | 59,417,476  | 61,035,570  | 1 | 0 | 1 | 0 |
| Case 73 | 10 | 61,050,653  | 84,416,129  | 3 | 0 | 3 | 1 |
| Case 73 | 10 | 84,423,164  | 85,944,516  | 1 | 0 | 1 | 0 |
| Case 73 | 10 | 85,950,406  | 85,968,504  | 2 | 0 | 2 | 1 |
| Case 73 | 10 | 85,970,790  | 88,852,942  | 1 | 0 | 1 | 0 |
| Case 73 | 10 | 88,864,876  | 89,069,591  | 2 | 0 | 2 | 1 |
| Case 73 | 10 | 89,081,583  | 90,352,886  | 1 | 0 | 1 | 0 |
| Case 73 | 10 | 90,353,775  | 90,356,670  | 0 | 0 | 0 | 0 |
| Case 73 | 10 | 90,358,138  | 91,143,343  | 1 | 0 | 1 | 0 |
| Case 73 | 10 | 91,143,468  | 91,144,241  | 2 | 0 | 2 | 1 |
| Case 73 | 10 | 91,144,451  | 91,468,925  | 1 | 0 | 1 | 0 |
| Case 73 | 10 | 91,469,005  | 91,522,548  | 0 | 0 | 0 | 0 |
| Case 73 | 10 | 91,522,558  | 92,362,797  | 1 | 0 | 1 | 0 |
| Case 73 | 10 | 92,371,952  | 102,726,641 | 4 | 0 | 4 | 1 |
| Case 73 | 10 | 102,731,584 | 102,835,254 | 3 | 0 | 3 | 1 |
| Case 73 | 10 | 102,841,029 | 109,303,140 | 4 | 0 | 4 | 1 |
| Case 73 | 10 | 109,306,967 | 127,542,753 | 5 | 0 | 5 | 1 |
| Case 73 | 10 | 127,548,215 | 127,831,501 | 2 | 0 | 2 | 1 |
| Case 73 | 10 | 127,833,685 | 128,027,301 | 3 | 0 | 3 | 1 |
| Case 73 | 10 | 128,030,262 | 128,808,908 | 2 | 0 | 2 | 1 |
| Case 73 | 10 | 128,809,541 | 128,996,576 | 3 | 0 | 3 | 1 |
| Case 73 | 10 | 129,001,986 | 129,089,317 | 2 | 0 | 2 | 1 |

|         |    |             |             |   |   |   |   |
|---------|----|-------------|-------------|---|---|---|---|
| Case 73 | 10 | 129,090,007 | 129,230,909 | 3 | 0 | 3 | 1 |
| Case 73 | 10 | 129,233,816 | 129,899,938 | 2 | 0 | 2 | 1 |
| Case 73 | 10 | 129,900,858 | 129,907,631 | 3 | 0 | 3 | 1 |
| Case 73 | 10 | 129,907,741 | 130,123,291 | 2 | 0 | 2 | 1 |
| Case 73 | 10 | 130,128,297 | 130,913,600 | 1 | 0 | 1 | 0 |
| Case 73 | 10 | 130,915,346 | 130,919,969 | 2 | 0 | 2 | 1 |
| Case 73 | 10 | 130,925,103 | 132,246,154 | 1 | 0 | 1 | 0 |
| Case 73 | 10 | 132,250,590 | 132,281,238 | 2 | 0 | 2 | 1 |
| Case 73 | 10 | 132,289,763 | 133,758,947 | 1 | 0 | 1 | 0 |
| Case 73 | 10 | 133,761,285 | 133,809,325 | 2 | 0 | 2 | 1 |
| Case 73 | 10 | 133,811,201 | 134,158,143 | 1 | 0 | 1 | 0 |
| Case 73 | 10 | 134,158,860 | 134,190,734 | 2 | 0 | 2 | 1 |
| Case 73 | 10 | 134,191,005 | 135,477,883 | 1 | 0 | 1 | 0 |
| Case 73 | 11 | 193,146     | 408,725     | 3 | 0 | 3 | 1 |
| Case 73 | 11 | 418,421     | 511,805     | 4 | 0 | 4 | 1 |
| Case 73 | 11 | 521,302     | 2,029,278   | 3 | 0 | 3 | 1 |
| Case 73 | 11 | 2,034,099   | 2,323,022   | 4 | 0 | 4 | 1 |
| Case 73 | 11 | 2,323,029   | 5,199,208   | 3 | 0 | 3 | 1 |
| Case 73 | 11 | 5,199,645   | 16,225,741  | 3 | 1 | 4 | 0 |
| Case 73 | 11 | 16,236,658  | 16,266,740  | 3 | 2 | 5 | 0 |
| Case 73 | 11 | 16,274,295  | 20,809,264  | 3 | 1 | 4 | 0 |
| Case 73 | 11 | 20,822,918  | 20,910,614  | 2 | 0 | 2 | 1 |
| Case 73 | 11 | 20,915,524  | 33,541,163  | 3 | 1 | 4 | 0 |
| Case 73 | 11 | 33,559,186  | 33,706,353  | 3 | 0 | 3 | 1 |
| Case 73 | 11 | 33,706,877  | 36,518,785  | 3 | 1 | 4 | 0 |
| Case 73 | 11 | 36,528,025  | 36,615,697  | 2 | 1 | 3 | 0 |
| Case 73 | 11 | 36,617,989  | 47,188,411  | 3 | 1 | 4 | 0 |
| Case 73 | 11 | 47,188,426  | 47,434,986  | 2 | 1 | 3 | 0 |
| Case 73 | 11 | 47,436,707  | 50,668,400  | 2 | 2 | 4 | 0 |
| Case 73 | 11 | 50,697,498  | 51,591,253  | 3 | 0 | 3 | 1 |
| Case 73 | 11 | 54,794,237  | 56,330,546  | 3 | 0 | 3 | 1 |
| Case 73 | 11 | 56,342,048  | 67,046,971  | 2 | 2 | 4 | 0 |
| Case 73 | 11 | 67,048,203  | 68,193,464  | 2 | 1 | 3 | 0 |
| Case 73 | 11 | 68,193,628  | 68,452,468  | 3 | 1 | 4 | 0 |
| Case 73 | 11 | 68,453,429  | 68,859,377  | 2 | 1 | 3 | 0 |
| Case 73 | 11 | 68,861,329  | 69,975,570  | 3 | 1 | 4 | 0 |
| Case 73 | 11 | 69,976,047  | 70,444,244  | 2 | 1 | 3 | 0 |
| Case 73 | 11 | 70,445,161  | 71,145,941  | 3 | 1 | 4 | 0 |
| Case 73 | 11 | 71,146,443  | 73,748,676  | 2 | 1 | 3 | 0 |
| Case 73 | 11 | 73,748,678  | 76,322,550  | 3 | 1 | 4 | 0 |
| Case 73 | 11 | 76,324,076  | 88,925,242  | 2 | 1 | 3 | 0 |
| Case 73 | 11 | 88,930,377  | 89,182,652  | 3 | 0 | 3 | 1 |
| Case 73 | 11 | 89,182,666  | 134,934,063 | 2 | 1 | 3 | 0 |
| Case 73 | 12 | 191,619     | 2,920,736   | 3 | 2 | 5 | 0 |
| Case 73 | 12 | 2,921,993   | 2,968,090   | 2 | 2 | 4 | 0 |
| Case 73 | 12 | 2,968,094   | 6,424,235   | 3 | 2 | 5 | 0 |
| Case 73 | 12 | 6,424,282   | 6,484,017   | 2 | 2 | 4 | 0 |
| Case 73 | 12 | 6,488,450   | 6,553,806   | 3 | 2 | 5 | 0 |
| Case 73 | 12 | 6,553,860   | 6,886,880   | 3 | 1 | 4 | 0 |
| Case 73 | 12 | 6,886,977   | 6,935,405   | 3 | 2 | 5 | 0 |
| Case 73 | 12 | 6,935,441   | 7,310,658   | 2 | 2 | 4 | 0 |
| Case 73 | 12 | 7,313,760   | 9,144,906   | 3 | 2 | 5 | 0 |
| Case 73 | 12 | 9,147,759   | 16,515,450  | 2 | 2 | 4 | 0 |
| Case 73 | 12 | 16,515,945  | 17,646,284  | 3 | 2 | 5 | 0 |
| Case 73 | 12 | 17,653,834  | 19,649,096  | 2 | 2 | 4 | 0 |
| Case 73 | 12 | 19,657,013  | 19,947,813  | 3 | 1 | 4 | 0 |
| Case 73 | 12 | 19,952,701  | 20,115,420  | 2 | 2 | 4 | 0 |
| Case 73 | 12 | 20,122,534  | 20,165,273  | 3 | 0 | 3 | 1 |
| Case 73 | 12 | 20,179,218  | 26,472,718  | 2 | 2 | 4 | 0 |
| Case 73 | 12 | 26,475,967  | 26,523,923  | 3 | 2 | 5 | 0 |
| Case 73 | 12 | 26,526,005  | 27,504,197  | 2 | 2 | 4 | 0 |



|         |    |             |             |   |   |   |   |
|---------|----|-------------|-------------|---|---|---|---|
| Case 73 | 12 | 27,508,240  | 27,775,904  | 3 | 2 | 5 | 0 |
| Case 73 | 12 | 27,777,195  | 28,217,895  | 2 | 2 | 4 | 0 |
| Case 73 | 12 | 28,218,371  | 28,744,641  | 3 | 2 | 5 | 0 |
| Case 73 | 12 | 28,744,922  | 31,987,426  | 2 | 2 | 4 | 0 |
| Case 73 | 12 | 31,997,831  | 34,149,433  | 3 | 2 | 5 | 0 |
| Case 73 | 12 | 34,160,187  | 34,853,011  | 2 | 2 | 4 | 0 |
| Case 73 | 12 | 37,876,400  | 38,416,139  | 2 | 2 | 4 | 0 |
| Case 73 | 12 | 38,424,982  | 38,529,491  | 3 | 0 | 3 | 1 |
| Case 73 | 12 | 38,541,366  | 38,686,613  | 2 | 1 | 3 | 0 |
| Case 73 | 12 | 38,696,809  | 52,636,874  | 3 | 1 | 4 | 0 |
| Case 73 | 12 | 52,639,235  | 53,907,067  | 2 | 1 | 3 | 0 |
| Case 73 | 12 | 53,908,839  | 56,215,891  | 3 | 1 | 4 | 0 |
| Case 73 | 12 | 56,216,070  | 56,558,438  | 2 | 1 | 3 | 0 |
| Case 73 | 12 | 56,558,450  | 57,116,661  | 3 | 1 | 4 | 0 |
| Case 73 | 12 | 57,116,834  | 57,319,226  | 3 | 2 | 5 | 0 |
| Case 73 | 12 | 57,319,336  | 57,441,459  | 2 | 2 | 4 | 0 |
| Case 73 | 12 | 57,441,489  | 59,809,256  | 3 | 2 | 5 | 0 |
| Case 73 | 12 | 59,816,947  | 60,460,147  | 2 | 2 | 4 | 0 |
| Case 73 | 12 | 60,469,422  | 61,596,597  | 3 | 2 | 5 | 0 |
| Case 73 | 12 | 61,604,963  | 61,842,406  | 3 | 1 | 4 | 0 |
| Case 73 | 12 | 61,844,049  | 61,851,235  | 2 | 2 | 4 | 0 |
| Case 73 | 12 | 61,855,400  | 61,883,539  | 3 | 2 | 5 | 0 |
| Case 73 | 12 | 61,884,068  | 66,182,455  | 2 | 2 | 4 | 0 |
| Case 73 | 12 | 66,186,486  | 85,391,419  | 3 | 0 | 3 | 1 |
| Case 73 | 12 | 85,394,887  | 85,564,834  | 2 | 0 | 2 | 1 |
| Case 73 | 12 | 85,576,492  | 88,440,736  | 3 | 0 | 3 | 1 |
| Case 73 | 12 | 88,444,154  | 88,524,191  | 2 | 0 | 2 | 1 |
| Case 73 | 12 | 88,530,520  | 109,539,785 | 3 | 0 | 3 | 1 |
| Case 73 | 12 | 109,540,689 | 122,092,186 | 4 | 0 | 4 | 1 |
| Case 73 | 12 | 122,092,823 | 122,359,506 | 3 | 0 | 3 | 1 |
| Case 73 | 12 | 122,359,542 | 123,868,158 | 4 | 0 | 4 | 1 |
| Case 73 | 12 | 123,872,037 | 133,810,935 | 3 | 0 | 3 | 1 |
| Case 73 | 13 | 19,058,717  | 22,271,565  | 2 | 1 | 3 | 0 |
| Case 73 | 13 | 22,274,442  | 22,631,175  | 3 | 1 | 4 | 0 |
| Case 73 | 13 | 22,636,003  | 23,329,181  | 4 | 1 | 5 | 0 |
| Case 73 | 13 | 23,331,502  | 25,596,287  | 4 | 0 | 4 | 1 |
| Case 73 | 13 | 25,598,246  | 25,671,941  | 3 | 1 | 4 | 0 |
| Case 73 | 13 | 25,671,978  | 28,282,522  | 4 | 0 | 4 | 1 |
| Case 73 | 13 | 28,283,059  | 28,645,757  | 3 | 1 | 4 | 0 |
| Case 73 | 13 | 28,648,669  | 30,520,402  | 4 | 0 | 4 | 1 |
| Case 73 | 13 | 30,521,753  | 31,838,560  | 3 | 1 | 4 | 0 |
| Case 73 | 13 | 31,838,688  | 33,704,029  | 4 | 0 | 4 | 1 |
| Case 73 | 13 | 33,704,030  | 33,704,651  | 3 | 1 | 4 | 0 |
| Case 73 | 13 | 33,706,179  | 33,720,790  | 4 | 0 | 4 | 1 |
| Case 73 | 13 | 33,724,537  | 34,380,920  | 4 | 1 | 5 | 0 |
| Case 73 | 13 | 34,383,767  | 34,396,199  | 3 | 1 | 4 | 0 |
| Case 73 | 13 | 34,399,263  | 40,370,177  | 4 | 0 | 4 | 1 |
| Case 73 | 13 | 40,371,377  | 40,469,165  | 3 | 1 | 4 | 0 |
| Case 73 | 13 | 40,471,398  | 40,902,175  | 4 | 1 | 5 | 0 |
| Case 73 | 13 | 40,903,898  | 41,074,557  | 3 | 1 | 4 | 0 |
| Case 73 | 13 | 41,076,410  | 43,555,803  | 4 | 0 | 4 | 1 |
| Case 73 | 13 | 43,555,837  | 44,861,721  | 3 | 1 | 4 | 0 |
| Case 73 | 13 | 44,862,358  | 46,865,970  | 4 | 0 | 4 | 1 |
| Case 73 | 13 | 46,866,122  | 48,399,027  | 3 | 1 | 4 | 0 |
| Case 73 | 13 | 48,400,077  | 49,417,350  | 2 | 1 | 3 | 0 |
| Case 73 | 13 | 49,418,012  | 49,449,182  | 3 | 1 | 4 | 0 |
| Case 73 | 13 | 49,449,644  | 67,152,595  | 3 | 0 | 3 | 1 |
| Case 73 | 13 | 67,158,351  | 67,249,849  | 2 | 0 | 2 | 1 |
| Case 73 | 13 | 67,264,175  | 71,381,493  | 3 | 0 | 3 | 1 |
| Case 73 | 13 | 71,381,526  | 71,731,904  | 4 | 0 | 4 | 1 |
| Case 73 | 13 | 71,741,392  | 73,891,902  | 2 | 0 | 2 | 1 |

|         |    |             |             |   |   |   |   |
|---------|----|-------------|-------------|---|---|---|---|
| Case 73 | 13 | 73,892,235  | 74,272,518  | 3 | 0 | 3 | 1 |
| Case 73 | 13 | 74,273,455  | 76,342,150  | 2 | 0 | 2 | 1 |
| Case 73 | 13 | 76,350,821  | 76,482,230  | 3 | 0 | 3 | 1 |
| Case 73 | 13 | 76,486,342  | 77,256,532  | 2 | 0 | 2 | 1 |
| Case 73 | 13 | 77,259,994  | 77,351,486  | 3 | 0 | 3 | 1 |
| Case 73 | 13 | 77,351,749  | 78,034,564  | 2 | 0 | 2 | 1 |
| Case 73 | 13 | 78,036,645  | 80,271,352  | 3 | 0 | 3 | 1 |
| Case 73 | 13 | 80,273,590  | 80,778,953  | 4 | 0 | 4 | 1 |
| Case 73 | 13 | 80,785,028  | 92,874,384  | 3 | 0 | 3 | 1 |
| Case 73 | 13 | 92,875,466  | 94,034,140  | 4 | 0 | 4 | 1 |
| Case 73 | 13 | 94,037,844  | 101,393,297 | 3 | 0 | 3 | 1 |
| Case 73 | 13 | 101,394,726 | 101,673,512 | 4 | 0 | 4 | 1 |
| Case 73 | 13 | 101,675,021 | 107,144,320 | 3 | 0 | 3 | 1 |
| Case 73 | 13 | 107,145,663 | 107,911,258 | 4 | 0 | 4 | 1 |
| Case 73 | 13 | 107,912,933 | 108,181,660 | 3 | 0 | 3 | 1 |
| Case 73 | 13 | 108,189,783 | 108,692,209 | 4 | 0 | 4 | 1 |
| Case 73 | 13 | 108,692,984 | 115,103,529 | 3 | 0 | 3 | 1 |
| Case 73 | 14 | 19,280,733  | 20,215,649  | 2 | 0 | 2 | 1 |
| Case 73 | 14 | 20,215,973  | 20,534,909  | 3 | 0 | 3 | 1 |
| Case 73 | 14 | 20,539,305  | 21,750,308  | 4 | 0 | 4 | 1 |
| Case 73 | 14 | 21,755,734  | 22,200,989  | 3 | 0 | 3 | 1 |
| Case 73 | 14 | 22,201,888  | 23,128,339  | 4 | 0 | 4 | 1 |
| Case 73 | 14 | 23,129,207  | 31,535,541  | 3 | 0 | 3 | 1 |
| Case 73 | 14 | 31,539,064  | 34,070,758  | 2 | 0 | 2 | 1 |
| Case 73 | 14 | 34,071,624  | 34,183,102  | 4 | 0 | 4 | 1 |
| Case 73 | 14 | 34,184,786  | 34,570,966  | 2 | 0 | 2 | 1 |
| Case 73 | 14 | 34,574,483  | 34,735,483  | 3 | 0 | 3 | 1 |
| Case 73 | 14 | 34,744,426  | 37,050,642  | 2 | 0 | 2 | 1 |
| Case 73 | 14 | 37,051,470  | 37,171,951  | 3 | 0 | 3 | 1 |
| Case 73 | 14 | 37,173,235  | 37,288,393  | 2 | 0 | 2 | 1 |
| Case 73 | 14 | 37,290,124  | 37,337,295  | 3 | 0 | 3 | 1 |
| Case 73 | 14 | 37,337,527  | 41,577,085  | 2 | 0 | 2 | 1 |
| Case 73 | 14 | 41,579,517  | 42,407,596  | 4 | 0 | 4 | 1 |
| Case 73 | 14 | 42,413,647  | 44,824,949  | 2 | 0 | 2 | 1 |
| Case 73 | 14 | 44,829,276  | 49,377,523  | 3 | 0 | 3 | 1 |
| Case 73 | 14 | 49,378,248  | 49,659,435  | 4 | 0 | 4 | 1 |
| Case 73 | 14 | 49,660,574  | 53,914,026  | 3 | 0 | 3 | 1 |
| Case 73 | 14 | 53,919,309  | 54,861,808  | 4 | 0 | 4 | 1 |
| Case 73 | 14 | 54,862,710  | 81,309,536  | 3 | 0 | 3 | 1 |
| Case 73 | 14 | 81,321,794  | 81,786,278  | 4 | 0 | 4 | 1 |
| Case 73 | 14 | 81,787,481  | 98,028,428  | 3 | 0 | 3 | 1 |
| Case 73 | 14 | 98,039,922  | 98,292,879  | 2 | 0 | 2 | 1 |
| Case 73 | 14 | 98,293,557  | 98,900,110  | 3 | 0 | 3 | 1 |
| Case 73 | 14 | 98,905,951  | 99,147,232  | 2 | 0 | 2 | 1 |
| Case 73 | 14 | 99,149,677  | 99,879,382  | 3 | 0 | 3 | 1 |
| Case 73 | 14 | 99,889,388  | 100,005,497 | 2 | 0 | 2 | 1 |
| Case 73 | 14 | 100,015,528 | 100,434,403 | 3 | 0 | 3 | 1 |
| Case 73 | 14 | 100,441,224 | 101,109,501 | 2 | 0 | 2 | 1 |
| Case 73 | 14 | 101,109,752 | 101,325,831 | 3 | 0 | 3 | 1 |
| Case 73 | 14 | 101,325,962 | 101,464,984 | 2 | 0 | 2 | 1 |
| Case 73 | 14 | 101,467,948 | 101,721,416 | 3 | 0 | 3 | 1 |
| Case 73 | 14 | 101,723,780 | 101,859,654 | 2 | 0 | 2 | 1 |
| Case 73 | 14 | 101,860,240 | 102,717,231 | 3 | 0 | 3 | 1 |
| Case 73 | 14 | 102,717,236 | 104,657,760 | 2 | 0 | 2 | 1 |
| Case 73 | 14 | 104,662,014 | 104,991,471 | 3 | 0 | 3 | 1 |
| Case 73 | 14 | 104,995,893 | 105,408,341 | 2 | 0 | 2 | 1 |
| Case 73 | 14 | 105,408,714 | 105,420,440 | 3 | 0 | 3 | 1 |
| Case 73 | 14 | 105,420,477 | 107,056,354 | 2 | 0 | 2 | 1 |
| Case 73 | 14 | 107,103,272 | 107,287,663 | 3 | 0 | 3 | 1 |
| Case 73 | 15 | 20,034,919  | 24,921,894  | 1 | 0 | 1 | 0 |
| Case 73 | 15 | 24,921,983  | 24,923,283  | 2 | 0 | 2 | 1 |

|         |    |            |            |   |   |   |   |
|---------|----|------------|------------|---|---|---|---|
| Case 73 | 15 | 24,923,403 | 25,925,284 | 1 | 0 | 1 | 0 |
| Case 73 | 15 | 25,925,339 | 25,956,104 | 2 | 0 | 2 | 1 |
| Case 73 | 15 | 25,957,736 | 26,865,632 | 1 | 0 | 1 | 0 |
| Case 73 | 15 | 26,867,286 | 26,906,648 | 2 | 0 | 2 | 1 |
| Case 73 | 15 | 26,910,450 | 28,053,557 | 1 | 0 | 1 | 0 |
| Case 73 | 15 | 28,053,778 | 28,080,692 | 2 | 0 | 2 | 1 |
| Case 73 | 15 | 28,083,423 | 29,346,518 | 1 | 0 | 1 | 0 |
| Case 73 | 15 | 29,346,590 | 29,380,123 | 2 | 0 | 2 | 1 |
| Case 73 | 15 | 29,381,801 | 30,007,573 | 1 | 0 | 1 | 0 |
| Case 73 | 15 | 30,008,889 | 30,011,131 | 2 | 0 | 2 | 1 |
| Case 73 | 15 | 30,011,276 | 31,321,875 | 1 | 0 | 1 | 0 |
| Case 73 | 15 | 31,322,565 | 31,418,766 | 3 | 0 | 3 | 1 |
| Case 73 | 15 | 31,420,785 | 31,449,628 | 2 | 0 | 2 | 1 |
| Case 73 | 15 | 31,451,498 | 32,081,782 | 3 | 0 | 3 | 1 |
| Case 73 | 15 | 32,082,749 | 32,938,761 | 2 | 0 | 2 | 1 |
| Case 73 | 15 | 32,939,946 | 33,025,627 | 3 | 0 | 3 | 1 |
| Case 73 | 15 | 33,025,979 | 33,231,485 | 2 | 0 | 2 | 1 |
| Case 73 | 15 | 33,233,556 | 33,332,101 | 3 | 0 | 3 | 1 |
| Case 73 | 15 | 33,342,543 | 33,818,190 | 2 | 0 | 2 | 1 |
| Case 73 | 15 | 33,820,338 | 34,040,442 | 3 | 0 | 3 | 1 |
| Case 73 | 15 | 34,041,335 | 34,126,865 | 2 | 0 | 2 | 1 |
| Case 73 | 15 | 34,127,220 | 34,215,897 | 3 | 0 | 3 | 1 |
| Case 73 | 15 | 34,217,317 | 38,838,264 | 2 | 0 | 2 | 1 |
| Case 73 | 15 | 38,839,587 | 39,181,802 | 3 | 0 | 3 | 1 |
| Case 73 | 15 | 39,188,421 | 39,539,801 | 2 | 0 | 2 | 1 |
| Case 73 | 15 | 39,542,265 | 39,872,056 | 3 | 0 | 3 | 1 |
| Case 73 | 15 | 39,873,284 | 41,099,827 | 2 | 0 | 2 | 1 |
| Case 73 | 15 | 41,099,843 | 41,223,901 | 3 | 0 | 3 | 1 |
| Case 73 | 15 | 41,224,538 | 42,222,390 | 2 | 0 | 2 | 1 |
| Case 73 | 15 | 42,223,259 | 42,326,259 | 3 | 0 | 3 | 1 |
| Case 73 | 15 | 42,326,362 | 42,392,164 | 2 | 0 | 2 | 1 |
| Case 73 | 15 | 42,394,368 | 42,439,503 | 3 | 0 | 3 | 1 |
| Case 73 | 15 | 42,439,540 | 43,365,760 | 2 | 0 | 2 | 1 |
| Case 73 | 15 | 43,382,887 | 43,991,180 | 3 | 0 | 3 | 1 |
| Case 73 | 15 | 44,016,417 | 45,436,389 | 2 | 2 | 4 | 0 |
| Case 73 | 15 | 45,436,392 | 45,543,281 | 3 | 2 | 5 | 0 |
| Case 73 | 15 | 45,543,870 | 46,052,390 | 2 | 2 | 4 | 0 |
| Case 73 | 15 | 46,061,069 | 46,845,521 | 3 | 2 | 5 | 0 |
| Case 73 | 15 | 46,847,878 | 49,397,812 | 2 | 2 | 4 | 0 |
| Case 73 | 15 | 49,414,418 | 49,585,979 | 3 | 0 | 3 | 1 |
| Case 73 | 15 | 49,601,425 | 50,555,544 | 2 | 2 | 4 | 0 |
| Case 73 | 15 | 50,564,884 | 50,793,009 | 3 | 2 | 5 | 0 |
| Case 73 | 15 | 50,806,469 | 53,206,136 | 2 | 2 | 4 | 0 |
| Case 73 | 15 | 53,209,322 | 53,493,565 | 4 | 2 | 6 | 0 |
| Case 73 | 15 | 53,494,101 | 55,894,558 | 3 | 2 | 5 | 0 |
| Case 73 | 15 | 55,908,203 | 63,322,026 | 3 | 1 | 4 | 0 |
| Case 73 | 15 | 63,323,779 | 64,712,608 | 2 | 1 | 3 | 0 |
| Case 73 | 15 | 64,721,828 | 67,078,484 | 3 | 1 | 4 | 0 |
| Case 73 | 15 | 67,081,843 | 68,452,136 | 4 | 1 | 5 | 0 |
| Case 73 | 15 | 68,467,093 | 69,430,016 | 3 | 1 | 4 | 0 |
| Case 73 | 15 | 69,430,906 | 69,778,982 | 4 | 1 | 5 | 0 |
| Case 73 | 15 | 69,781,764 | 70,721,586 | 3 | 1 | 4 | 0 |
| Case 73 | 15 | 70,722,262 | 72,006,057 | 4 | 1 | 5 | 0 |
| Case 73 | 15 | 72,007,353 | 72,270,591 | 3 | 1 | 4 | 0 |
| Case 73 | 15 | 72,270,594 | 72,495,496 | 4 | 0 | 4 | 1 |
| Case 73 | 15 | 72,496,762 | 73,259,994 | 3 | 1 | 4 | 0 |
| Case 73 | 15 | 73,267,452 | 73,552,659 | 4 | 1 | 5 | 0 |
| Case 73 | 15 | 73,554,544 | 75,703,979 | 3 | 1 | 4 | 0 |
| Case 73 | 15 | 75,704,005 | 77,324,693 | 3 | 2 | 5 | 0 |
| Case 73 | 15 | 77,324,696 | 77,474,081 | 3 | 1 | 4 | 0 |
| Case 73 | 15 | 77,508,046 | 78,234,637 | 3 | 2 | 5 | 0 |

|         |    |             |             |   |   |   |   |
|---------|----|-------------|-------------|---|---|---|---|
| Case 73 | 15 | 78,255,219  | 78,489,562  | 3 | 1 | 4 | 0 |
| Case 73 | 15 | 78,497,593  | 78,826,180  | 3 | 2 | 5 | 0 |
| Case 73 | 15 | 78,831,753  | 78,927,589  | 3 | 1 | 4 | 0 |
| Case 73 | 15 | 78,927,863  | 81,558,045  | 3 | 2 | 5 | 0 |
| Case 73 | 15 | 81,558,093  | 81,641,872  | 3 | 1 | 4 | 0 |
| Case 73 | 15 | 81,642,344  | 82,564,555  | 3 | 2 | 5 | 0 |
| Case 73 | 15 | 82,571,046  | 83,527,867  | 3 | 1 | 4 | 0 |
| Case 73 | 15 | 83,532,948  | 84,580,582  | 3 | 2 | 5 | 0 |
| Case 73 | 15 | 84,581,888  | 84,700,103  | 3 | 1 | 4 | 0 |
| Case 73 | 15 | 84,700,108  | 88,914,634  | 3 | 2 | 5 | 0 |
| Case 73 | 15 | 88,920,678  | 89,563,112  | 3 | 1 | 4 | 0 |
| Case 73 | 15 | 89,565,486  | 90,162,954  | 3 | 2 | 5 | 0 |
| Case 73 | 15 | 90,166,981  | 90,174,776  | 2 | 2 | 4 | 0 |
| Case 73 | 15 | 90,174,780  | 90,784,376  | 3 | 2 | 5 | 0 |
| Case 73 | 15 | 90,784,478  | 90,814,976  | 2 | 2 | 4 | 0 |
| Case 73 | 15 | 90,815,287  | 91,354,439  | 3 | 2 | 5 | 0 |
| Case 73 | 15 | 91,354,505  | 91,557,071  | 3 | 1 | 4 | 0 |
| Case 73 | 15 | 91,561,076  | 99,664,045  | 3 | 2 | 5 | 0 |
| Case 73 | 15 | 99,666,329  | 99,759,194  | 3 | 1 | 4 | 0 |
| Case 73 | 15 | 99,759,673  | 101,437,358 | 3 | 2 | 5 | 0 |
| Case 73 | 15 | 101,438,862 | 101,618,508 | 3 | 1 | 4 | 0 |
| Case 73 | 15 | 101,623,455 | 102,461,162 | 3 | 2 | 5 | 0 |
| Case 73 | 16 | 88,165      | 1,155,025   | 2 | 1 | 3 | 0 |
| Case 73 | 16 | 1,159,731   | 1,187,931   | 1 | 0 | 1 | 0 |
| Case 73 | 16 | 1,192,213   | 1,536,938   | 2 | 1 | 3 | 0 |
| Case 73 | 16 | 1,537,391   | 1,550,409   | 1 | 1 | 2 | 0 |
| Case 73 | 16 | 1,550,474   | 3,594,316   | 2 | 1 | 3 | 0 |
| Case 73 | 16 | 3,598,190   | 3,613,911   | 1 | 1 | 2 | 0 |
| Case 73 | 16 | 3,614,059   | 4,343,620   | 2 | 1 | 3 | 0 |
| Case 73 | 16 | 4,347,504   | 4,382,420   | 1 | 1 | 2 | 0 |
| Case 73 | 16 | 4,382,607   | 6,972,216   | 2 | 1 | 3 | 0 |
| Case 73 | 16 | 6,993,055   | 7,014,662   | 2 | 0 | 2 | 1 |
| Case 73 | 16 | 7,016,549   | 35,285,582  | 2 | 1 | 3 | 0 |
| Case 73 | 16 | 46,450,037  | 46,450,037  | 2 | 1 | 3 | 0 |
| Case 73 | 16 | 46,532,286  | 48,399,330  | 1 | 1 | 2 | 0 |
| Case 73 | 16 | 48,399,361  | 49,173,186  | 2 | 1 | 3 | 0 |
| Case 73 | 16 | 49,191,705  | 53,191,383  | 2 | 0 | 2 | 1 |
| Case 73 | 16 | 53,196,042  | 53,321,892  | 1 | 0 | 1 | 0 |
| Case 73 | 16 | 53,326,860  | 54,004,811  | 2 | 0 | 2 | 1 |
| Case 73 | 16 | 54,005,163  | 54,009,501  | 1 | 0 | 1 | 0 |
| Case 73 | 16 | 54,019,686  | 56,198,338  | 2 | 0 | 2 | 1 |
| Case 73 | 16 | 56,223,892  | 56,464,517  | 2 | 1 | 3 | 0 |
| Case 73 | 16 | 56,465,425  | 56,604,888  | 1 | 1 | 2 | 0 |
| Case 73 | 16 | 56,606,138  | 58,246,346  | 2 | 1 | 3 | 0 |
| Case 73 | 16 | 58,246,941  | 58,577,485  | 1 | 1 | 2 | 0 |
| Case 73 | 16 | 58,579,274  | 58,861,762  | 2 | 1 | 3 | 0 |
| Case 73 | 16 | 58,863,961  | 59,559,038  | 1 | 1 | 2 | 0 |
| Case 73 | 16 | 59,567,416  | 59,731,567  | 2 | 1 | 3 | 0 |
| Case 73 | 16 | 59,731,831  | 60,136,254  | 1 | 1 | 2 | 0 |
| Case 73 | 16 | 60,146,143  | 60,250,569  | 2 | 1 | 3 | 0 |
| Case 73 | 16 | 60,251,539  | 60,665,658  | 1 | 1 | 2 | 0 |
| Case 73 | 16 | 60,671,834  | 61,484,024  | 2 | 1 | 3 | 0 |
| Case 73 | 16 | 61,487,834  | 61,668,912  | 1 | 1 | 2 | 0 |
| Case 73 | 16 | 61,674,103  | 61,815,646  | 1 | 0 | 1 | 0 |
| Case 73 | 16 | 61,823,318  | 62,304,320  | 1 | 1 | 2 | 0 |
| Case 73 | 16 | 62,306,387  | 62,532,437  | 2 | 1 | 3 | 0 |
| Case 73 | 16 | 62,535,183  | 62,804,413  | 1 | 1 | 2 | 0 |
| Case 73 | 16 | 62,806,940  | 63,518,506  | 2 | 1 | 3 | 0 |
| Case 73 | 16 | 63,520,218  | 64,620,001  | 1 | 1 | 2 | 0 |
| Case 73 | 16 | 64,636,137  | 68,592,497  | 2 | 1 | 3 | 0 |
| Case 73 | 16 | 68,597,030  | 68,840,588  | 2 | 0 | 2 | 1 |

|         |    |            |            |   |   |   |   |
|---------|----|------------|------------|---|---|---|---|
| Case 73 | 16 | 68,842,734 | 71,877,966 | 2 | 1 | 3 | 0 |
| Case 73 | 16 | 71,884,209 | 72,984,739 | 2 | 0 | 2 | 1 |
| Case 73 | 16 | 72,990,553 | 73,213,224 | 3 | 0 | 3 | 1 |
| Case 73 | 16 | 73,220,771 | 76,432,398 | 2 | 0 | 2 | 1 |
| Case 73 | 16 | 76,438,005 | 76,495,945 | 1 | 0 | 1 | 0 |
| Case 73 | 16 | 76,498,403 | 76,569,482 | 2 | 0 | 2 | 1 |
| Case 73 | 16 | 76,569,512 | 76,592,552 | 1 | 0 | 1 | 0 |
| Case 73 | 16 | 76,592,633 | 78,077,430 | 2 | 0 | 2 | 1 |
| Case 73 | 16 | 78,087,730 | 78,153,157 | 1 | 0 | 1 | 0 |
| Case 73 | 16 | 78,160,462 | 78,206,556 | 0 | 0 | 0 | 0 |
| Case 73 | 16 | 78,206,954 | 78,224,186 | 1 | 0 | 1 | 0 |
| Case 73 | 16 | 78,236,048 | 78,410,634 | 0 | 0 | 0 | 0 |
| Case 73 | 16 | 78,413,896 | 78,482,142 | 1 | 0 | 1 | 0 |
| Case 73 | 16 | 78,487,877 | 78,520,045 | 0 | 0 | 0 | 0 |
| Case 73 | 16 | 78,522,184 | 78,527,664 | 1 | 0 | 1 | 0 |
| Case 73 | 16 | 78,533,357 | 78,693,758 | 0 | 0 | 0 | 0 |
| Case 73 | 16 | 78,696,257 | 78,814,629 | 1 | 0 | 1 | 0 |
| Case 73 | 16 | 78,816,421 | 78,839,835 | 0 | 0 | 0 | 0 |
| Case 73 | 16 | 78,840,745 | 78,877,418 | 1 | 0 | 1 | 0 |
| Case 73 | 16 | 78,877,618 | 78,901,723 | 0 | 0 | 0 | 0 |
| Case 73 | 16 | 78,901,769 | 78,911,336 | 1 | 0 | 1 | 0 |
| Case 73 | 16 | 78,914,000 | 78,953,857 | 0 | 0 | 0 | 0 |
| Case 73 | 16 | 78,955,140 | 78,979,747 | 1 | 0 | 1 | 0 |
| Case 73 | 16 | 78,980,401 | 78,996,850 | 0 | 0 | 0 | 0 |
| Case 73 | 16 | 78,997,613 | 79,053,610 | 1 | 0 | 1 | 0 |
| Case 73 | 16 | 79,053,912 | 79,093,317 | 0 | 0 | 0 | 0 |
| Case 73 | 16 | 79,095,848 | 79,102,113 | 1 | 0 | 1 | 0 |
| Case 73 | 16 | 79,104,622 | 79,153,058 | 0 | 0 | 0 | 0 |
| Case 73 | 16 | 79,155,751 | 79,157,216 | 1 | 0 | 1 | 0 |
| Case 73 | 16 | 79,158,182 | 79,236,908 | 0 | 0 | 0 | 0 |
| Case 73 | 16 | 79,237,510 | 79,251,509 | 1 | 0 | 1 | 0 |
| Case 73 | 16 | 79,252,324 | 79,280,298 | 0 | 0 | 0 | 0 |
| Case 73 | 16 | 79,287,520 | 79,316,815 | 1 | 0 | 1 | 0 |
| Case 73 | 16 | 79,317,203 | 79,319,687 | 0 | 0 | 0 | 0 |
| Case 73 | 16 | 79,320,912 | 79,377,362 | 1 | 0 | 1 | 0 |
| Case 73 | 16 | 79,377,763 | 79,421,837 | 0 | 0 | 0 | 0 |
| Case 73 | 16 | 79,427,879 | 79,465,813 | 1 | 0 | 1 | 0 |
| Case 73 | 16 | 79,466,556 | 79,520,553 | 0 | 0 | 0 | 0 |
| Case 73 | 16 | 79,522,673 | 79,562,141 | 1 | 0 | 1 | 0 |
| Case 73 | 16 | 79,565,165 | 79,585,021 | 0 | 0 | 0 | 0 |
| Case 73 | 16 | 79,586,741 | 79,592,020 | 1 | 0 | 1 | 0 |
| Case 73 | 16 | 79,594,409 | 79,605,583 | 0 | 0 | 0 | 0 |
| Case 73 | 16 | 79,606,877 | 79,627,282 | 1 | 0 | 1 | 0 |
| Case 73 | 16 | 79,628,181 | 79,655,663 | 0 | 0 | 0 | 0 |
| Case 73 | 16 | 79,670,291 | 79,682,751 | 1 | 0 | 1 | 0 |
| Case 73 | 16 | 79,685,297 | 79,729,031 | 0 | 0 | 0 | 0 |
| Case 73 | 16 | 79,738,425 | 79,744,548 | 1 | 0 | 1 | 0 |
| Case 73 | 16 | 79,744,986 | 79,941,572 | 0 | 0 | 0 | 0 |
| Case 73 | 16 | 79,942,562 | 79,962,334 | 1 | 0 | 1 | 0 |
| Case 73 | 16 | 79,967,324 | 79,980,410 | 0 | 0 | 0 | 0 |
| Case 73 | 16 | 79,980,883 | 80,025,366 | 1 | 0 | 1 | 0 |
| Case 73 | 16 | 80,028,483 | 80,151,666 | 0 | 0 | 0 | 0 |
| Case 73 | 16 | 80,151,927 | 80,688,157 | 1 | 0 | 1 | 0 |
| Case 73 | 16 | 80,696,071 | 82,775,107 | 2 | 0 | 2 | 1 |
| Case 73 | 16 | 82,776,234 | 82,784,943 | 1 | 0 | 1 | 0 |
| Case 73 | 16 | 82,785,970 | 82,834,027 | 2 | 0 | 2 | 1 |
| Case 73 | 16 | 82,835,886 | 83,065,664 | 1 | 0 | 1 | 0 |
| Case 73 | 16 | 83,065,743 | 83,069,709 | 2 | 0 | 2 | 1 |
| Case 73 | 16 | 83,071,614 | 84,214,236 | 1 | 0 | 1 | 0 |
| Case 73 | 16 | 84,215,011 | 84,215,475 | 2 | 0 | 2 | 1 |
| Case 73 | 16 | 84,215,557 | 84,230,257 | 1 | 0 | 1 | 0 |

|         |    |            |            |   |   |   |   |
|---------|----|------------|------------|---|---|---|---|
| Case 73 | 16 | 84,230,300 | 84,230,500 | 0 | 0 | 0 | 0 |
| Case 73 | 16 | 84,231,114 | 84,307,087 | 1 | 0 | 1 | 0 |
| Case 73 | 16 | 84,308,076 | 84,340,877 | 2 | 0 | 2 | 1 |
| Case 73 | 16 | 84,346,747 | 84,914,186 | 1 | 0 | 1 | 0 |
| Case 73 | 16 | 84,914,818 | 87,920,275 | 2 | 0 | 2 | 1 |
| Case 73 | 16 | 87,931,281 | 88,321,176 | 3 | 0 | 3 | 1 |
| Case 73 | 16 | 88,331,640 | 88,904,097 | 2 | 0 | 2 | 1 |
| Case 73 | 16 | 88,904,521 | 89,008,510 | 3 | 0 | 3 | 1 |
| Case 73 | 16 | 89,014,871 | 89,737,329 | 2 | 0 | 2 | 1 |
| Case 73 | 16 | 89,737,463 | 89,866,043 | 1 | 0 | 1 | 0 |
| Case 73 | 16 | 89,869,704 | 89,908,003 | 0 | 0 | 0 | 0 |
| Case 73 | 16 | 89,911,747 | 89,916,600 | 1 | 0 | 1 | 0 |
| Case 73 | 16 | 89,916,774 | 89,927,195 | 0 | 0 | 0 | 0 |
| Case 73 | 16 | 89,929,944 | 89,984,143 | 1 | 0 | 1 | 0 |
| Case 73 | 16 | 89,984,370 | 89,986,030 | 0 | 0 | 0 | 0 |
| Case 73 | 16 | 89,986,091 | 90,038,786 | 1 | 0 | 1 | 0 |
| Case 73 | 16 | 90,045,986 | 90,050,880 | 0 | 0 | 0 | 0 |
| Case 73 | 16 | 90,053,048 | 90,072,265 | 1 | 0 | 1 | 0 |
| Case 73 | 16 | 90,074,001 | 90,095,620 | 0 | 0 | 0 | 0 |
| Case 73 | 16 | 90,095,654 | 90,274,695 | 1 | 0 | 1 | 0 |
| Case 73 | 17 | 11,885     | 22,242,355 | 3 | 0 | 3 | 1 |
| Case 73 | 17 | 25,268,142 | 25,295,032 | 3 | 0 | 3 | 1 |
| Case 73 | 17 | 25,329,949 | 28,877,845 | 3 | 1 | 4 | 0 |
| Case 73 | 17 | 28,878,817 | 34,436,708 | 2 | 0 | 2 | 1 |
| Case 73 | 17 | 34,443,811 | 34,456,073 | 3 | 0 | 3 | 1 |
| Case 73 | 17 | 34,458,934 | 34,476,396 | 3 | 1 | 4 | 0 |
| Case 73 | 17 | 34,597,521 | 36,991,576 | 2 | 0 | 2 | 1 |
| Case 73 | 17 | 36,996,181 | 40,330,841 | 3 | 0 | 3 | 1 |
| Case 73 | 17 | 40,335,086 | 60,889,186 | 4 | 0 | 4 | 1 |
| Case 73 | 17 | 60,893,485 | 61,488,965 | 2 | 0 | 2 | 1 |
| Case 73 | 17 | 61,489,417 | 61,573,804 | 3 | 0 | 3 | 1 |
| Case 73 | 17 | 61,574,215 | 61,896,487 | 2 | 0 | 2 | 1 |
| Case 73 | 17 | 61,897,218 | 62,407,139 | 3 | 0 | 3 | 1 |
| Case 73 | 17 | 62,408,299 | 62,476,451 | 1 | 0 | 1 | 0 |
| Case 73 | 17 | 62,479,069 | 63,329,765 | 3 | 0 | 3 | 1 |
| Case 73 | 17 | 63,332,178 | 63,533,624 | 2 | 0 | 2 | 1 |
| Case 73 | 17 | 63,534,340 | 63,734,166 | 3 | 0 | 3 | 1 |
| Case 73 | 17 | 63,734,778 | 64,197,259 | 2 | 0 | 2 | 1 |
| Case 73 | 17 | 64,197,405 | 65,105,649 | 3 | 0 | 3 | 1 |
| Case 73 | 17 | 65,108,042 | 67,721,149 | 2 | 2 | 4 | 0 |
| Case 73 | 17 | 67,754,386 | 67,829,458 | 3 | 0 | 3 | 1 |
| Case 73 | 17 | 67,857,630 | 68,905,652 | 2 | 0 | 2 | 1 |
| Case 73 | 17 | 68,907,823 | 71,839,114 | 3 | 0 | 3 | 1 |
| Case 73 | 17 | 71,839,751 | 72,037,062 | 4 | 0 | 4 | 1 |
| Case 73 | 17 | 72,037,147 | 75,523,579 | 3 | 0 | 3 | 1 |
| Case 73 | 17 | 75,528,870 | 75,924,338 | 4 | 0 | 4 | 1 |
| Case 73 | 17 | 75,925,820 | 81,060,040 | 3 | 0 | 3 | 1 |
| Case 73 | 18 | 87,505     | 15,375,878 | 3 | 0 | 3 | 1 |
| Case 73 | 18 | 18,520,354 | 32,112,405 | 3 | 0 | 3 | 1 |
| Case 73 | 18 | 32,113,901 | 32,743,516 | 3 | 1 | 4 | 0 |
| Case 73 | 18 | 32,744,127 | 34,983,864 | 3 | 0 | 3 | 1 |
| Case 73 | 18 | 34,984,578 | 34,992,205 | 1 | 0 | 1 | 0 |
| Case 73 | 18 | 35,000,087 | 41,552,391 | 3 | 0 | 3 | 1 |
| Case 73 | 18 | 41,557,562 | 42,712,436 | 3 | 1 | 4 | 0 |
| Case 73 | 18 | 42,713,485 | 43,224,125 | 3 | 0 | 3 | 1 |
| Case 73 | 18 | 43,226,440 | 43,381,801 | 3 | 1 | 4 | 0 |
| Case 73 | 18 | 43,394,375 | 43,536,260 | 2 | 1 | 3 | 0 |
| Case 73 | 18 | 43,537,275 | 44,043,196 | 3 | 1 | 4 | 0 |
| Case 73 | 18 | 44,045,287 | 45,547,811 | 3 | 0 | 3 | 1 |
| Case 73 | 18 | 45,549,279 | 49,957,255 | 4 | 0 | 4 | 1 |
| Case 73 | 18 | 49,960,237 | 50,215,412 | 3 | 1 | 4 | 0 |

|         |    |            |            |   |   |   |   |
|---------|----|------------|------------|---|---|---|---|
| Case 73 | 18 | 50,221,480 | 72,907,278 | 4 | 0 | 4 | 1 |
| Case 73 | 18 | 72,910,687 | 72,922,457 | 3 | 0 | 3 | 1 |
| Case 73 | 18 | 72,933,187 | 74,518,951 | 4 | 0 | 4 | 1 |
| Case 73 | 18 | 74,523,247 | 74,683,389 | 3 | 0 | 3 | 1 |
| Case 73 | 18 | 74,684,211 | 74,828,883 | 4 | 0 | 4 | 1 |
| Case 73 | 18 | 74,838,659 | 75,150,503 | 3 | 1 | 4 | 0 |
| Case 73 | 18 | 75,152,119 | 75,894,302 | 4 | 0 | 4 | 1 |
| Case 73 | 18 | 75,899,708 | 78,015,180 | 3 | 1 | 4 | 0 |
| Case 73 | 19 | 260,912    | 582,505    | 3 | 0 | 3 | 1 |
| Case 73 | 19 | 582,775    | 2,306,575  | 2 | 0 | 2 | 1 |
| Case 73 | 19 | 2,310,756  | 2,369,415  | 3 | 0 | 3 | 1 |
| Case 73 | 19 | 2,369,931  | 2,993,524  | 2 | 0 | 2 | 1 |
| Case 73 | 19 | 2,993,562  | 3,070,479  | 3 | 0 | 3 | 1 |
| Case 73 | 19 | 3,076,808  | 5,915,098  | 2 | 0 | 2 | 1 |
| Case 73 | 19 | 5,915,300  | 5,970,822  | 3 | 0 | 3 | 1 |
| Case 73 | 19 | 5,979,820  | 9,049,224  | 2 | 0 | 2 | 1 |
| Case 73 | 19 | 9,049,260  | 9,091,772  | 3 | 0 | 3 | 1 |
| Case 73 | 19 | 9,096,252  | 10,108,687 | 2 | 0 | 2 | 1 |
| Case 73 | 19 | 10,108,850 | 10,180,795 | 3 | 0 | 3 | 1 |
| Case 73 | 19 | 10,181,347 | 10,745,467 | 2 | 0 | 2 | 1 |
| Case 73 | 19 | 10,745,479 | 10,888,624 | 3 | 0 | 3 | 1 |
| Case 73 | 19 | 10,893,735 | 11,224,296 | 2 | 0 | 2 | 1 |
| Case 73 | 19 | 11,224,398 | 11,258,720 | 3 | 0 | 3 | 1 |
| Case 73 | 19 | 11,263,650 | 11,361,620 | 2 | 0 | 2 | 1 |
| Case 73 | 19 | 11,361,753 | 11,446,144 | 3 | 0 | 3 | 1 |
| Case 73 | 19 | 11,446,171 | 13,335,432 | 2 | 0 | 2 | 1 |
| Case 73 | 19 | 13,335,562 | 13,868,278 | 3 | 0 | 3 | 1 |
| Case 73 | 19 | 13,869,687 | 14,273,567 | 2 | 0 | 2 | 1 |
| Case 73 | 19 | 14,273,612 | 14,717,791 | 3 | 0 | 3 | 1 |
| Case 73 | 19 | 14,719,254 | 15,131,436 | 2 | 0 | 2 | 1 |
| Case 73 | 19 | 15,131,668 | 15,198,804 | 3 | 0 | 3 | 1 |
| Case 73 | 19 | 15,203,866 | 15,837,869 | 2 | 0 | 2 | 1 |
| Case 73 | 19 | 15,838,869 | 16,002,820 | 3 | 0 | 3 | 1 |
| Case 73 | 19 | 16,004,371 | 16,172,739 | 2 | 0 | 2 | 1 |
| Case 73 | 19 | 16,176,940 | 16,685,638 | 3 | 0 | 3 | 1 |
| Case 73 | 19 | 16,686,864 | 18,624,964 | 2 | 0 | 2 | 1 |
| Case 73 | 19 | 18,637,610 | 24,545,366 | 2 | 2 | 4 | 0 |
| Case 73 | 19 | 24,629,285 | 24,629,285 | 2 | 1 | 3 | 0 |
| Case 73 | 19 | 27,732,159 | 28,178,423 | 2 | 1 | 3 | 0 |
| Case 73 | 19 | 28,185,193 | 31,996,788 | 2 | 2 | 4 | 0 |
| Case 73 | 19 | 32,011,548 | 32,818,410 | 3 | 1 | 4 | 0 |
| Case 73 | 19 | 32,828,881 | 33,702,245 | 2 | 1 | 3 | 0 |
| Case 73 | 19 | 33,702,322 | 34,417,800 | 3 | 1 | 4 | 0 |
| Case 73 | 19 | 34,421,191 | 37,005,500 | 2 | 1 | 3 | 0 |
| Case 73 | 19 | 37,005,872 | 37,289,017 | 3 | 1 | 4 | 0 |
| Case 73 | 19 | 37,309,486 | 40,486,301 | 2 | 1 | 3 | 0 |
| Case 73 | 19 | 40,501,915 | 40,719,959 | 1 | 1 | 2 | 0 |
| Case 73 | 19 | 40,720,381 | 41,356,054 | 2 | 1 | 3 | 0 |
| Case 73 | 19 | 41,356,751 | 41,379,148 | 1 | 0 | 1 | 0 |
| Case 73 | 19 | 41,382,476 | 54,888,703 | 2 | 1 | 3 | 0 |
| Case 73 | 19 | 54,891,185 | 54,974,460 | 3 | 1 | 4 | 0 |
| Case 73 | 19 | 54,981,997 | 59,097,160 | 2 | 1 | 3 | 0 |
| Case 73 | 20 | 63,244     | 3,677,326  | 3 | 1 | 4 | 0 |
| Case 73 | 20 | 3,677,494  | 3,888,337  | 2 | 1 | 3 | 0 |
| Case 73 | 20 | 3,888,644  | 7,683,869  | 3 | 1 | 4 | 0 |
| Case 73 | 20 | 7,684,688  | 8,527,885  | 3 | 2 | 5 | 0 |
| Case 73 | 20 | 8,527,904  | 10,575,952 | 4 | 2 | 6 | 0 |
| Case 73 | 20 | 10,579,373 | 10,671,462 | 3 | 2 | 5 | 0 |
| Case 73 | 20 | 10,679,095 | 15,435,564 | 4 | 2 | 6 | 0 |
| Case 73 | 20 | 15,435,756 | 15,438,731 | 3 | 2 | 5 | 0 |
| Case 73 | 20 | 15,443,446 | 16,046,525 | 4 | 1 | 5 | 0 |

|         |    |            |            |   |   |   |   |
|---------|----|------------|------------|---|---|---|---|
| Case 73 | 20 | 16,049,287 | 16,054,623 | 3 | 1 | 4 | 0 |
| Case 73 | 20 | 16,055,272 | 16,729,138 | 3 | 2 | 5 | 0 |
| Case 73 | 20 | 16,729,262 | 17,000,370 | 4 | 2 | 6 | 0 |
| Case 73 | 20 | 17,007,410 | 22,437,091 | 3 | 2 | 5 | 0 |
| Case 73 | 20 | 22,441,124 | 22,543,034 | 4 | 2 | 6 | 0 |
| Case 73 | 20 | 22,547,347 | 24,846,232 | 3 | 2 | 5 | 0 |
| Case 73 | 20 | 24,847,926 | 25,004,176 | 2 | 2 | 4 | 0 |
| Case 73 | 20 | 25,004,219 | 26,246,086 | 3 | 2 | 5 | 0 |
| Case 73 | 20 | 26,247,606 | 26,293,985 | 4 | 1 | 5 | 0 |
| Case 73 | 20 | 29,425,357 | 34,063,034 | 4 | 1 | 5 | 0 |
| Case 73 | 20 | 34,064,340 | 34,848,116 | 7 | 0 | 7 | 1 |
| Case 73 | 20 | 34,849,290 | 35,046,949 | 4 | 1 | 5 | 0 |
| Case 73 | 20 | 35,047,221 | 35,281,592 | 3 | 1 | 4 | 0 |
| Case 73 | 20 | 35,282,011 | 51,870,163 | 4 | 1 | 5 | 0 |
| Case 73 | 20 | 51,870,244 | 51,876,653 | 3 | 1 | 4 | 0 |
| Case 73 | 20 | 51,879,861 | 52,060,067 | 4 | 1 | 5 | 0 |
| Case 73 | 20 | 52,063,311 | 52,304,108 | 7 | 0 | 7 | 1 |
| Case 73 | 20 | 52,309,657 | 52,355,341 | 4 | 1 | 5 | 0 |
| Case 73 | 20 | 52,356,646 | 54,468,058 | 5 | 1 | 6 | 0 |
| Case 73 | 20 | 54,482,276 | 58,436,963 | 4 | 1 | 5 | 0 |
| Case 73 | 20 | 58,440,630 | 58,544,820 | 6 | 1 | 7 | 0 |
| Case 73 | 20 | 58,545,197 | 58,571,793 | 4 | 1 | 5 | 0 |
| Case 73 | 20 | 58,572,142 | 60,772,923 | 5 | 1 | 6 | 0 |
| Case 73 | 20 | 60,772,998 | 60,776,275 | 4 | 1 | 5 | 0 |
| Case 73 | 20 | 60,777,232 | 62,722,711 | 5 | 1 | 6 | 0 |
| Case 73 | 20 | 62,724,093 | 62,948,788 | 4 | 1 | 5 | 0 |
| Case 73 | 21 | 10,827,533 | 10,971,337 | 2 | 0 | 2 | 1 |
| Case 73 | 21 | 14,368,320 | 15,514,013 | 2 | 0 | 2 | 1 |
| Case 73 | 21 | 15,515,843 | 15,849,874 | 1 | 0 | 1 | 0 |
| Case 73 | 21 | 15,850,292 | 15,858,697 | 2 | 0 | 2 | 1 |
| Case 73 | 21 | 15,859,450 | 15,902,978 | 1 | 0 | 1 | 0 |
| Case 73 | 21 | 15,906,590 | 16,204,351 | 2 | 0 | 2 | 1 |
| Case 73 | 21 | 16,209,949 | 16,315,838 | 1 | 0 | 1 | 0 |
| Case 73 | 21 | 16,318,226 | 16,339,797 | 2 | 0 | 2 | 1 |
| Case 73 | 21 | 16,339,852 | 16,346,881 | 1 | 0 | 1 | 0 |
| Case 73 | 21 | 16,350,485 | 16,363,250 | 2 | 0 | 2 | 1 |
| Case 73 | 21 | 16,364,756 | 16,521,176 | 1 | 0 | 1 | 0 |
| Case 73 | 21 | 16,524,247 | 16,732,004 | 2 | 0 | 2 | 1 |
| Case 73 | 21 | 16,734,872 | 16,850,308 | 1 | 0 | 1 | 0 |
| Case 73 | 21 | 16,851,122 | 17,059,038 | 2 | 0 | 2 | 1 |
| Case 73 | 21 | 17,065,143 | 17,654,621 | 1 | 0 | 1 | 0 |
| Case 73 | 21 | 17,657,785 | 17,670,775 | 2 | 0 | 2 | 1 |
| Case 73 | 21 | 17,675,675 | 18,382,681 | 1 | 0 | 1 | 0 |
| Case 73 | 21 | 18,383,733 | 18,452,225 | 2 | 0 | 2 | 1 |
| Case 73 | 21 | 18,453,305 | 18,633,839 | 1 | 0 | 1 | 0 |
| Case 73 | 21 | 18,636,600 | 19,151,566 | 2 | 0 | 2 | 1 |
| Case 73 | 21 | 19,154,417 | 19,438,152 | 1 | 0 | 1 | 0 |
| Case 73 | 21 | 19,447,495 | 19,534,836 | 2 | 0 | 2 | 1 |
| Case 73 | 21 | 19,535,591 | 19,639,174 | 1 | 0 | 1 | 0 |
| Case 73 | 21 | 19,639,195 | 19,660,053 | 2 | 0 | 2 | 1 |
| Case 73 | 21 | 19,662,652 | 19,687,517 | 1 | 0 | 1 | 0 |
| Case 73 | 21 | 19,689,010 | 19,723,055 | 2 | 0 | 2 | 1 |
| Case 73 | 21 | 19,723,501 | 20,160,506 | 1 | 0 | 1 | 0 |
| Case 73 | 21 | 20,162,364 | 20,249,206 | 2 | 0 | 2 | 1 |
| Case 73 | 21 | 20,250,104 | 21,535,472 | 1 | 0 | 1 | 0 |
| Case 73 | 21 | 21,535,568 | 21,637,719 | 2 | 0 | 2 | 1 |
| Case 73 | 21 | 21,639,279 | 21,697,744 | 1 | 0 | 1 | 0 |
| Case 73 | 21 | 21,698,075 | 21,727,308 | 2 | 0 | 2 | 1 |
| Case 73 | 21 | 21,728,433 | 22,044,940 | 1 | 0 | 1 | 0 |
| Case 73 | 21 | 22,048,355 | 22,158,238 | 2 | 0 | 2 | 1 |
| Case 73 | 21 | 22,162,833 | 23,264,430 | 1 | 0 | 1 | 0 |



|         |    |            |            |   |   |   |   |
|---------|----|------------|------------|---|---|---|---|
| Case 73 | 21 | 23,266,183 | 23,464,848 | 2 | 1 | 3 | 0 |
| Case 73 | 21 | 23,470,698 | 23,925,128 | 1 | 1 | 2 | 0 |
| Case 73 | 21 | 23,940,999 | 24,127,320 | 2 | 1 | 3 | 0 |
| Case 73 | 21 | 24,129,169 | 25,224,320 | 1 | 1 | 2 | 0 |
| Case 73 | 21 | 25,227,346 | 25,275,790 | 2 | 1 | 3 | 0 |
| Case 73 | 21 | 25,280,867 | 25,446,807 | 2 | 0 | 2 | 1 |
| Case 73 | 21 | 25,452,702 | 25,583,058 | 1 | 0 | 1 | 0 |
| Case 73 | 21 | 25,587,093 | 26,145,577 | 2 | 0 | 2 | 1 |
| Case 73 | 21 | 26,147,773 | 26,215,045 | 1 | 0 | 1 | 0 |
| Case 73 | 21 | 26,223,909 | 28,225,582 | 2 | 0 | 2 | 1 |
| Case 73 | 21 | 28,229,786 | 28,294,090 | 1 | 0 | 1 | 0 |
| Case 73 | 21 | 28,294,143 | 28,534,333 | 2 | 0 | 2 | 1 |
| Case 73 | 21 | 28,539,950 | 28,568,502 | 1 | 0 | 1 | 0 |
| Case 73 | 21 | 28,570,637 | 31,694,642 | 2 | 0 | 2 | 1 |
| Case 73 | 21 | 31,704,067 | 31,709,691 | 0 | 0 | 0 | 0 |
| Case 73 | 21 | 31,709,703 | 31,711,892 | 1 | 0 | 1 | 0 |
| Case 73 | 21 | 31,715,081 | 31,763,139 | 2 | 0 | 2 | 1 |
| Case 73 | 21 | 31,763,618 | 31,887,658 | 2 | 1 | 3 | 0 |
| Case 73 | 21 | 31,909,272 | 32,017,177 | 1 | 1 | 2 | 0 |
| Case 73 | 21 | 32,020,375 | 32,410,695 | 2 | 1 | 3 | 0 |
| Case 73 | 21 | 32,415,227 | 32,639,222 | 1 | 1 | 2 | 0 |
| Case 73 | 21 | 32,644,046 | 32,999,554 | 2 | 1 | 3 | 0 |
| Case 73 | 21 | 33,018,369 | 33,140,026 | 1 | 1 | 2 | 0 |
| Case 73 | 21 | 33,146,821 | 33,514,887 | 2 | 1 | 3 | 0 |
| Case 73 | 21 | 33,515,320 | 33,727,781 | 1 | 1 | 2 | 0 |
| Case 73 | 21 | 33,729,129 | 33,869,440 | 2 | 1 | 3 | 0 |
| Case 73 | 21 | 33,873,929 | 34,168,573 | 1 | 1 | 2 | 0 |
| Case 73 | 21 | 34,180,921 | 34,588,494 | 2 | 1 | 3 | 0 |
| Case 73 | 21 | 34,590,090 | 35,201,030 | 1 | 1 | 2 | 0 |
| Case 73 | 21 | 35,201,281 | 37,484,942 | 2 | 1 | 3 | 0 |
| Case 73 | 21 | 37,485,062 | 37,835,648 | 1 | 1 | 2 | 0 |
| Case 73 | 21 | 37,836,711 | 38,171,655 | 2 | 1 | 3 | 0 |
| Case 73 | 21 | 38,181,569 | 38,905,245 | 1 | 1 | 2 | 0 |
| Case 73 | 21 | 38,906,782 | 48,100,155 | 2 | 1 | 3 | 0 |
| Case 73 | 22 | 16,114,244 | 17,590,607 | 1 | 1 | 2 | 0 |
| Case 73 | 22 | 17,590,744 | 17,747,195 | 2 | 1 | 3 | 0 |
| Case 73 | 22 | 17,758,677 | 18,886,915 | 3 | 1 | 4 | 0 |
| Case 73 | 22 | 18,889,490 | 21,416,442 | 3 | 0 | 3 | 1 |
| Case 73 | 22 | 21,421,069 | 22,161,964 | 4 | 0 | 4 | 1 |
| Case 73 | 22 | 22,161,974 | 24,220,053 | 3 | 0 | 3 | 1 |
| Case 73 | 22 | 24,220,358 | 24,426,407 | 4 | 0 | 4 | 1 |
| Case 73 | 22 | 24,432,578 | 25,604,477 | 3 | 0 | 3 | 1 |
| Case 73 | 22 | 25,607,259 | 29,445,563 | 4 | 0 | 4 | 1 |
| Case 73 | 22 | 29,445,795 | 33,144,874 | 3 | 0 | 3 | 1 |
| Case 73 | 22 | 33,145,685 | 33,402,604 | 4 | 0 | 4 | 1 |
| Case 73 | 22 | 33,402,843 | 33,628,586 | 5 | 0 | 5 | 1 |
| Case 73 | 22 | 33,637,087 | 36,515,269 | 4 | 0 | 4 | 1 |
| Case 73 | 22 | 36,517,932 | 38,545,619 | 3 | 0 | 3 | 1 |
| Case 73 | 22 | 38,546,033 | 39,069,510 | 4 | 0 | 4 | 1 |
| Case 73 | 22 | 39,076,587 | 39,148,606 | 3 | 0 | 3 | 1 |
| Case 73 | 22 | 39,148,608 | 39,411,737 | 4 | 0 | 4 | 1 |
| Case 73 | 22 | 39,413,365 | 44,924,370 | 3 | 0 | 3 | 1 |
| Case 73 | 22 | 44,924,394 | 45,132,687 | 4 | 0 | 4 | 1 |
| Case 73 | 22 | 45,132,831 | 45,719,228 | 3 | 0 | 3 | 1 |
| Case 73 | 22 | 45,723,846 | 45,776,213 | 4 | 0 | 4 | 1 |
| Case 73 | 22 | 45,779,406 | 45,838,156 | 3 | 0 | 3 | 1 |
| Case 73 | 22 | 45,838,817 | 46,562,959 | 4 | 0 | 4 | 1 |
| Case 73 | 22 | 46,563,133 | 51,195,728 | 3 | 0 | 3 | 1 |
| Case 74 | 1  | 82,154     | 1,211,292  | 3 | 0 | 3 | 1 |
| Case 74 | 1  | 1,213,305  | 1,469,384  | 2 | 0 | 2 | 1 |
| Case 74 | 1  | 1,469,412  | 1,619,541  | 3 | 0 | 3 | 1 |

|         |   |             |             |   |   |   |   |
|---------|---|-------------|-------------|---|---|---|---|
| Case 74 | 1 | 1,627,987   | 1,627,987   | 1 | 0 | 1 | 0 |
| Case 74 | 1 | 1,647,686   | 1,680,219   | 0 | 0 | 0 | 0 |
| Case 74 | 1 | 1,684,472   | 1,686,087   | 2 | 0 | 2 | 1 |
| Case 74 | 1 | 1,686,116   | 20,442,878  | 3 | 0 | 3 | 1 |
| Case 74 | 1 | 20,442,892  | 20,672,051  | 2 | 0 | 2 | 1 |
| Case 74 | 1 | 20,677,416  | 20,750,561  | 3 | 0 | 3 | 1 |
| Case 74 | 1 | 20,758,192  | 25,243,554  | 2 | 0 | 2 | 1 |
| Case 74 | 1 | 25,243,767  | 25,333,899  | 3 | 0 | 3 | 1 |
| Case 74 | 1 | 25,335,222  | 34,254,416  | 2 | 0 | 2 | 1 |
| Case 74 | 1 | 34,254,701  | 34,642,383  | 3 | 0 | 3 | 1 |
| Case 74 | 1 | 34,643,413  | 34,666,582  | 2 | 0 | 2 | 1 |
| Case 74 | 1 | 34,666,589  | 54,765,727  | 3 | 0 | 3 | 1 |
| Case 74 | 1 | 54,766,101  | 55,044,940  | 4 | 0 | 4 | 1 |
| Case 74 | 1 | 55,045,676  | 73,197,081  | 3 | 0 | 3 | 1 |
| Case 74 | 1 | 73,203,025  | 75,160,724  | 4 | 0 | 4 | 1 |
| Case 74 | 1 | 75,164,678  | 86,028,530  | 2 | 0 | 2 | 1 |
| Case 74 | 1 | 86,034,864  | 86,092,872  | 3 | 0 | 3 | 1 |
| Case 74 | 1 | 86,095,613  | 86,939,461  | 2 | 0 | 2 | 1 |
| Case 74 | 1 | 86,939,540  | 86,988,709  | 3 | 0 | 3 | 1 |
| Case 74 | 1 | 86,995,816  | 87,330,141  | 2 | 0 | 2 | 1 |
| Case 74 | 1 | 87,369,103  | 87,381,454  | 3 | 0 | 3 | 1 |
| Case 74 | 1 | 87,428,302  | 87,613,358  | 2 | 0 | 2 | 1 |
| Case 74 | 1 | 87,614,821  | 87,894,363  | 3 | 0 | 3 | 1 |
| Case 74 | 1 | 87,897,907  | 88,257,998  | 2 | 0 | 2 | 1 |
| Case 74 | 1 | 88,260,306  | 88,346,411  | 3 | 0 | 3 | 1 |
| Case 74 | 1 | 88,350,912  | 90,536,797  | 2 | 0 | 2 | 1 |
| Case 74 | 1 | 90,537,317  | 90,671,625  | 3 | 0 | 3 | 1 |
| Case 74 | 1 | 90,679,734  | 91,175,419  | 2 | 0 | 2 | 1 |
| Case 74 | 1 | 91,178,036  | 91,321,687  | 3 | 0 | 3 | 1 |
| Case 74 | 1 | 91,325,323  | 91,581,942  | 2 | 0 | 2 | 1 |
| Case 74 | 1 | 91,586,000  | 91,631,091  | 3 | 0 | 3 | 1 |
| Case 74 | 1 | 91,632,172  | 92,003,919  | 2 | 0 | 2 | 1 |
| Case 74 | 1 | 92,006,877  | 92,339,976  | 3 | 0 | 3 | 1 |
| Case 74 | 1 | 92,358,371  | 94,474,020  | 2 | 0 | 2 | 1 |
| Case 74 | 1 | 94,474,185  | 94,637,058  | 3 | 0 | 3 | 1 |
| Case 74 | 1 | 94,638,711  | 95,142,547  | 2 | 0 | 2 | 1 |
| Case 74 | 1 | 95,142,843  | 95,160,537  | 3 | 0 | 3 | 1 |
| Case 74 | 1 | 95,161,617  | 95,195,432  | 2 | 0 | 2 | 1 |
| Case 74 | 1 | 95,198,251  | 95,603,092  | 3 | 0 | 3 | 1 |
| Case 74 | 1 | 95,609,563  | 95,754,014  | 2 | 0 | 2 | 1 |
| Case 74 | 1 | 95,757,160  | 96,018,531  | 3 | 0 | 3 | 1 |
| Case 74 | 1 | 96,019,588  | 100,796,296 | 2 | 0 | 2 | 1 |
| Case 74 | 1 | 100,798,137 | 101,002,833 | 3 | 0 | 3 | 1 |
| Case 74 | 1 | 101,003,659 | 101,725,605 | 2 | 0 | 2 | 1 |
| Case 74 | 1 | 101,726,526 | 101,836,640 | 3 | 0 | 3 | 1 |
| Case 74 | 1 | 101,838,064 | 107,960,860 | 2 | 0 | 2 | 1 |
| Case 74 | 1 | 107,961,196 | 108,116,715 | 3 | 0 | 3 | 1 |
| Case 74 | 1 | 108,124,480 | 109,391,662 | 2 | 0 | 2 | 1 |
| Case 74 | 1 | 109,392,715 | 109,397,229 | 3 | 0 | 3 | 1 |
| Case 74 | 1 | 109,399,543 | 109,768,889 | 2 | 0 | 2 | 1 |
| Case 74 | 1 | 109,771,063 | 109,794,785 | 3 | 0 | 3 | 1 |
| Case 74 | 1 | 109,794,992 | 111,003,201 | 2 | 0 | 2 | 1 |
| Case 74 | 1 | 111,006,869 | 111,166,960 | 3 | 0 | 3 | 1 |
| Case 74 | 1 | 111,169,375 | 111,812,709 | 2 | 0 | 2 | 1 |
| Case 74 | 1 | 111,813,951 | 112,078,745 | 3 | 0 | 3 | 1 |
| Case 74 | 1 | 112,079,314 | 112,309,437 | 2 | 0 | 2 | 1 |
| Case 74 | 1 | 112,315,450 | 112,511,555 | 3 | 0 | 3 | 1 |
| Case 74 | 1 | 112,513,203 | 114,438,951 | 2 | 0 | 2 | 1 |
| Case 74 | 1 | 114,440,547 | 114,795,885 | 3 | 0 | 3 | 1 |
| Case 74 | 1 | 114,797,698 | 115,645,831 | 2 | 0 | 2 | 1 |
| Case 74 | 1 | 115,648,756 | 116,040,016 | 3 | 0 | 3 | 1 |

|         |   |             |             |   |   |   |   |
|---------|---|-------------|-------------|---|---|---|---|
| Case 74 | 1 | 116,050,880 | 116,165,458 | 2 | 0 | 2 | 1 |
| Case 74 | 1 | 116,170,427 | 116,334,813 | 3 | 0 | 3 | 1 |
| Case 74 | 1 | 116,336,876 | 116,605,423 | 2 | 0 | 2 | 1 |
| Case 74 | 1 | 116,607,788 | 116,907,359 | 3 | 0 | 3 | 1 |
| Case 74 | 1 | 116,917,574 | 118,035,850 | 2 | 0 | 2 | 1 |
| Case 74 | 1 | 118,038,557 | 118,277,252 | 3 | 0 | 3 | 1 |
| Case 74 | 1 | 118,278,275 | 119,787,542 | 2 | 0 | 2 | 1 |
| Case 74 | 1 | 119,789,106 | 120,344,398 | 3 | 0 | 3 | 1 |
| Case 74 | 1 | 120,344,880 | 120,415,364 | 2 | 0 | 2 | 1 |
| Case 74 | 1 | 120,418,844 | 121,346,616 | 3 | 0 | 3 | 1 |
| Case 74 | 1 | 142,649,718 | 145,395,440 | 3 | 0 | 3 | 1 |
| Case 74 | 1 | 145,395,604 | 149,201,987 | 4 | 0 | 4 | 1 |
| Case 74 | 1 | 149,660,940 | 150,727,538 | 3 | 0 | 3 | 1 |
| Case 74 | 1 | 150,727,539 | 150,960,423 | 4 | 0 | 4 | 1 |
| Case 74 | 1 | 150,960,430 | 151,551,265 | 3 | 0 | 3 | 1 |
| Case 74 | 1 | 151,551,320 | 152,058,192 | 4 | 0 | 4 | 1 |
| Case 74 | 1 | 152,058,269 | 152,328,190 | 3 | 0 | 3 | 1 |
| Case 74 | 1 | 152,328,835 | 153,614,712 | 4 | 0 | 4 | 1 |
| Case 74 | 1 | 153,614,810 | 154,018,621 | 3 | 0 | 3 | 1 |
| Case 74 | 1 | 154,018,655 | 154,227,239 | 4 | 0 | 4 | 1 |
| Case 74 | 1 | 154,227,639 | 154,548,721 | 3 | 0 | 3 | 1 |
| Case 74 | 1 | 154,551,032 | 154,896,032 | 4 | 0 | 4 | 1 |
| Case 74 | 1 | 154,898,881 | 156,268,832 | 3 | 0 | 3 | 1 |
| Case 74 | 1 | 156,268,833 | 156,394,000 | 4 | 0 | 4 | 1 |
| Case 74 | 1 | 156,395,744 | 156,916,729 | 3 | 0 | 3 | 1 |
| Case 74 | 1 | 156,917,152 | 161,009,523 | 4 | 0 | 4 | 1 |
| Case 74 | 1 | 161,010,762 | 161,089,340 | 3 | 0 | 3 | 1 |
| Case 74 | 1 | 161,089,650 | 180,063,445 | 4 | 0 | 4 | 1 |
| Case 74 | 1 | 180,064,742 | 192,889,405 | 3 | 0 | 3 | 1 |
| Case 74 | 1 | 192,891,048 | 193,161,959 | 2 | 0 | 2 | 1 |
| Case 74 | 1 | 193,164,147 | 193,288,856 | 1 | 0 | 1 | 0 |
| Case 74 | 1 | 193,290,358 | 193,569,748 | 2 | 0 | 2 | 1 |
| Case 74 | 1 | 193,576,625 | 228,210,573 | 3 | 0 | 3 | 1 |
| Case 74 | 1 | 228,216,997 | 228,268,492 | 2 | 0 | 2 | 1 |
| Case 74 | 1 | 228,269,089 | 247,653,624 | 3 | 0 | 3 | 1 |
| Case 74 | 1 | 247,654,439 | 247,654,439 | 1 | 0 | 1 | 0 |
| Case 74 | 1 | 247,654,493 | 247,655,088 | 0 | 0 | 0 | 0 |
| Case 74 | 1 | 247,655,102 | 247,655,102 | 2 | 0 | 2 | 1 |
| Case 74 | 1 | 247,655,270 | 249,218,992 | 3 | 0 | 3 | 1 |
| Case 74 | 2 | 18,674      | 33,623,566  | 2 | 1 | 3 | 0 |
| Case 74 | 2 | 33,623,720  | 34,578,706  | 3 | 1 | 4 | 0 |
| Case 74 | 2 | 34,580,853  | 43,312,809  | 2 | 1 | 3 | 0 |
| Case 74 | 2 | 43,314,116  | 43,496,986  | 3 | 1 | 4 | 0 |
| Case 74 | 2 | 43,501,686  | 57,507,510  | 2 | 1 | 3 | 0 |
| Case 74 | 2 | 57,514,841  | 57,532,112  | 1 | 0 | 1 | 0 |
| Case 74 | 2 | 57,542,882  | 75,938,251  | 2 | 1 | 3 | 0 |
| Case 74 | 2 | 75,940,599  | 76,393,883  | 2 | 2 | 4 | 0 |
| Case 74 | 2 | 76,404,263  | 77,078,101  | 2 | 1 | 3 | 0 |
| Case 74 | 2 | 77,082,852  | 77,772,143  | 2 | 0 | 2 | 1 |
| Case 74 | 2 | 77,774,970  | 88,383,996  | 2 | 1 | 3 | 0 |
| Case 74 | 2 | 88,384,084  | 89,452,968  | 3 | 1 | 4 | 0 |
| Case 74 | 2 | 89,516,537  | 92,050,792  | 2 | 1 | 3 | 0 |
| Case 74 | 2 | 92,081,640  | 92,081,640  | 3 | 0 | 3 | 1 |
| Case 74 | 2 | 95,429,424  | 141,751,592 | 3 | 0 | 3 | 1 |
| Case 74 | 2 | 141,751,676 | 142,230,158 | 2 | 0 | 2 | 1 |
| Case 74 | 2 | 142,231,898 | 187,103,445 | 3 | 0 | 3 | 1 |
| Case 74 | 2 | 187,150,058 | 187,350,241 | 4 | 0 | 4 | 1 |
| Case 74 | 2 | 187,356,004 | 213,347,104 | 3 | 0 | 3 | 1 |
| Case 74 | 2 | 213,351,973 | 217,411,246 | 2 | 0 | 2 | 1 |
| Case 74 | 2 | 217,412,087 | 217,661,530 | 3 | 0 | 3 | 1 |
| Case 74 | 2 | 217,661,788 | 218,966,315 | 2 | 0 | 2 | 1 |

|         |   |             |             |   |   |   |   |
|---------|---|-------------|-------------|---|---|---|---|
| Case 74 | 2 | 218,988,774 | 219,029,133 | 3 | 0 | 3 | 1 |
| Case 74 | 2 | 219,029,339 | 221,150,805 | 2 | 0 | 2 | 1 |
| Case 74 | 2 | 221,157,107 | 221,412,389 | 3 | 0 | 3 | 1 |
| Case 74 | 2 | 221,418,204 | 222,198,941 | 2 | 0 | 2 | 1 |
| Case 74 | 2 | 222,199,604 | 222,290,902 | 3 | 0 | 3 | 1 |
| Case 74 | 2 | 222,291,194 | 223,135,983 | 2 | 0 | 2 | 1 |
| Case 74 | 2 | 223,137,001 | 223,349,415 | 3 | 0 | 3 | 1 |
| Case 74 | 2 | 223,350,001 | 224,673,015 | 2 | 0 | 2 | 1 |
| Case 74 | 2 | 224,674,868 | 224,932,899 | 3 | 0 | 3 | 1 |
| Case 74 | 2 | 224,933,339 | 228,825,101 | 2 | 0 | 2 | 1 |
| Case 74 | 2 | 228,838,054 | 228,907,927 | 3 | 0 | 3 | 1 |
| Case 74 | 2 | 228,912,194 | 231,035,575 | 2 | 0 | 2 | 1 |
| Case 74 | 2 | 231,036,425 | 231,083,132 | 3 | 0 | 3 | 1 |
| Case 74 | 2 | 231,083,171 | 231,440,375 | 2 | 0 | 2 | 1 |
| Case 74 | 2 | 231,440,555 | 231,493,060 | 3 | 0 | 3 | 1 |
| Case 74 | 2 | 231,493,293 | 234,960,960 | 2 | 0 | 2 | 1 |
| Case 74 | 2 | 234,961,167 | 235,000,529 | 3 | 0 | 3 | 1 |
| Case 74 | 2 | 235,001,151 | 235,780,667 | 2 | 0 | 2 | 1 |
| Case 74 | 2 | 235,784,645 | 235,950,386 | 3 | 0 | 3 | 1 |
| Case 74 | 2 | 235,950,461 | 237,585,368 | 2 | 0 | 2 | 1 |
| Case 74 | 2 | 237,586,032 | 237,707,551 | 3 | 0 | 3 | 1 |
| Case 74 | 2 | 237,708,511 | 243,048,760 | 2 | 0 | 2 | 1 |
| Case 74 | 3 | 61,495      | 565,961     | 1 | 0 | 1 | 0 |
| Case 74 | 3 | 580,021     | 678,347     | 2 | 0 | 2 | 1 |
| Case 74 | 3 | 684,744     | 2,183,750   | 1 | 0 | 1 | 0 |
| Case 74 | 3 | 2,184,749   | 2,198,673   | 2 | 0 | 2 | 1 |
| Case 74 | 3 | 2,200,851   | 2,409,532   | 1 | 0 | 1 | 0 |
| Case 74 | 3 | 2,411,618   | 2,426,255   | 2 | 0 | 2 | 1 |
| Case 74 | 3 | 2,426,632   | 3,079,127   | 1 | 0 | 1 | 0 |
| Case 74 | 3 | 3,080,200   | 3,133,989   | 2 | 0 | 2 | 1 |
| Case 74 | 3 | 3,137,053   | 3,236,900   | 1 | 0 | 1 | 0 |
| Case 74 | 3 | 3,238,654   | 3,434,942   | 2 | 0 | 2 | 1 |
| Case 74 | 3 | 3,441,441   | 3,478,365   | 1 | 0 | 1 | 0 |
| Case 74 | 3 | 3,494,748   | 3,564,622   | 0 | 0 | 0 | 0 |
| Case 74 | 3 | 3,569,967   | 3,585,219   | 1 | 0 | 1 | 0 |
| Case 74 | 3 | 3,587,732   | 3,593,599   | 0 | 0 | 0 | 0 |
| Case 74 | 3 | 3,599,937   | 3,649,300   | 2 | 0 | 2 | 1 |
| Case 74 | 3 | 3,650,239   | 3,885,609   | 1 | 0 | 1 | 0 |
| Case 74 | 3 | 3,886,665   | 3,888,392   | 2 | 0 | 2 | 1 |
| Case 74 | 3 | 3,888,442   | 4,076,977   | 1 | 0 | 1 | 0 |
| Case 74 | 3 | 4,078,654   | 4,103,926   | 2 | 0 | 2 | 1 |
| Case 74 | 3 | 4,105,578   | 4,504,624   | 1 | 0 | 1 | 0 |
| Case 74 | 3 | 4,508,871   | 4,615,243   | 2 | 0 | 2 | 1 |
| Case 74 | 3 | 4,616,061   | 4,665,228   | 1 | 0 | 1 | 0 |
| Case 74 | 3 | 4,665,565   | 4,868,927   | 2 | 0 | 2 | 1 |
| Case 74 | 3 | 4,869,590   | 5,016,106   | 1 | 0 | 1 | 0 |
| Case 74 | 3 | 5,019,936   | 5,184,958   | 2 | 0 | 2 | 1 |
| Case 74 | 3 | 5,191,756   | 5,312,162   | 1 | 0 | 1 | 0 |
| Case 74 | 3 | 5,312,819   | 5,380,959   | 2 | 0 | 2 | 1 |
| Case 74 | 3 | 5,388,363   | 5,789,768   | 1 | 0 | 1 | 0 |
| Case 74 | 3 | 5,790,183   | 5,799,685   | 2 | 0 | 2 | 1 |
| Case 74 | 3 | 5,801,886   | 6,189,636   | 1 | 0 | 1 | 0 |
| Case 74 | 3 | 6,197,199   | 6,328,081   | 2 | 0 | 2 | 1 |
| Case 74 | 3 | 6,328,641   | 6,690,670   | 1 | 0 | 1 | 0 |
| Case 74 | 3 | 6,692,421   | 6,795,801   | 2 | 0 | 2 | 1 |
| Case 74 | 3 | 6,796,046   | 7,468,858   | 1 | 0 | 1 | 0 |
| Case 74 | 3 | 7,474,369   | 7,507,463   | 2 | 0 | 2 | 1 |
| Case 74 | 3 | 7,508,573   | 7,607,994   | 1 | 0 | 1 | 0 |
| Case 74 | 3 | 7,615,142   | 7,641,515   | 2 | 0 | 2 | 1 |
| Case 74 | 3 | 7,641,740   | 7,891,245   | 1 | 0 | 1 | 0 |
| Case 74 | 3 | 7,891,262   | 7,963,677   | 2 | 0 | 2 | 1 |

|         |   |            |            |   |   |   |   |
|---------|---|------------|------------|---|---|---|---|
| Case 74 | 3 | 7,963,833  | 8,012,506  | 1 | 0 | 1 | 0 |
| Case 74 | 3 | 8,016,833  | 8,141,952  | 2 | 0 | 2 | 1 |
| Case 74 | 3 | 8,143,674  | 8,358,721  | 1 | 0 | 1 | 0 |
| Case 74 | 3 | 8,359,650  | 8,469,784  | 2 | 0 | 2 | 1 |
| Case 74 | 3 | 8,472,855  | 8,492,028  | 1 | 0 | 1 | 0 |
| Case 74 | 3 | 8,494,223  | 8,808,515  | 2 | 0 | 2 | 1 |
| Case 74 | 3 | 8,809,033  | 8,809,741  | 1 | 0 | 1 | 0 |
| Case 74 | 3 | 8,810,896  | 9,798,499  | 2 | 0 | 2 | 1 |
| Case 74 | 3 | 9,798,740  | 9,863,233  | 3 | 0 | 3 | 1 |
| Case 74 | 3 | 9,867,484  | 9,871,038  | 2 | 0 | 2 | 1 |
| Case 74 | 3 | 9,874,914  | 9,925,491  | 1 | 0 | 1 | 0 |
| Case 74 | 3 | 9,926,348  | 9,953,248  | 2 | 0 | 2 | 1 |
| Case 74 | 3 | 9,953,258  | 9,974,348  | 1 | 0 | 1 | 0 |
| Case 74 | 3 | 9,974,774  | 9,986,249  | 2 | 0 | 2 | 1 |
| Case 74 | 3 | 9,988,044  | 10,089,689 | 1 | 0 | 1 | 0 |
| Case 74 | 3 | 10,094,126 | 10,128,825 | 2 | 0 | 2 | 1 |
| Case 74 | 3 | 10,128,928 | 10,142,452 | 1 | 0 | 1 | 0 |
| Case 74 | 3 | 10,142,949 | 10,146,268 | 2 | 0 | 2 | 1 |
| Case 74 | 3 | 10,146,448 | 10,249,720 | 1 | 0 | 1 | 0 |
| Case 74 | 3 | 10,249,984 | 10,264,432 | 2 | 0 | 2 | 1 |
| Case 74 | 3 | 10,264,477 | 10,413,526 | 1 | 0 | 1 | 0 |
| Case 74 | 3 | 10,413,601 | 10,594,207 | 2 | 0 | 2 | 1 |
| Case 74 | 3 | 10,594,938 | 10,655,504 | 1 | 0 | 1 | 0 |
| Case 74 | 3 | 10,656,823 | 10,792,193 | 2 | 0 | 2 | 1 |
| Case 74 | 3 | 10,796,183 | 10,970,053 | 1 | 0 | 1 | 0 |
| Case 74 | 3 | 10,970,207 | 11,211,697 | 2 | 0 | 2 | 1 |
| Case 74 | 3 | 11,213,268 | 11,290,122 | 1 | 0 | 1 | 0 |
| Case 74 | 3 | 11,292,682 | 11,397,417 | 2 | 0 | 2 | 1 |
| Case 74 | 3 | 11,400,019 | 11,487,506 | 1 | 0 | 1 | 0 |
| Case 74 | 3 | 11,493,926 | 11,633,979 | 2 | 0 | 2 | 1 |
| Case 74 | 3 | 11,635,631 | 11,670,573 | 1 | 0 | 1 | 0 |
| Case 74 | 3 | 11,671,484 | 11,682,129 | 2 | 0 | 2 | 1 |
| Case 74 | 3 | 11,690,450 | 11,763,001 | 1 | 0 | 1 | 0 |
| Case 74 | 3 | 11,767,553 | 14,272,914 | 2 | 0 | 2 | 1 |
| Case 74 | 3 | 14,275,457 | 14,528,004 | 3 | 0 | 3 | 1 |
| Case 74 | 3 | 14,528,028 | 16,151,388 | 2 | 0 | 2 | 1 |
| Case 74 | 3 | 16,156,855 | 16,169,676 | 3 | 0 | 3 | 1 |
| Case 74 | 3 | 16,169,710 | 19,040,447 | 2 | 0 | 2 | 1 |
| Case 74 | 3 | 19,041,089 | 32,904,417 | 3 | 0 | 3 | 1 |
| Case 74 | 3 | 32,908,632 | 33,467,112 | 4 | 0 | 4 | 1 |
| Case 74 | 3 | 33,467,159 | 37,396,678 | 3 | 0 | 3 | 1 |
| Case 74 | 3 | 37,403,413 | 37,665,385 | 4 | 0 | 4 | 1 |
| Case 74 | 3 | 37,670,678 | 44,283,844 | 3 | 0 | 3 | 1 |
| Case 74 | 3 | 44,284,584 | 59,696,535 | 2 | 0 | 2 | 1 |
| Case 74 | 3 | 59,697,151 | 59,768,262 | 3 | 0 | 3 | 1 |
| Case 74 | 3 | 59,768,349 | 60,388,743 | 2 | 0 | 2 | 1 |
| Case 74 | 3 | 60,390,846 | 60,390,846 | 1 | 0 | 1 | 0 |
| Case 74 | 3 | 60,396,850 | 60,447,369 | 0 | 0 | 0 | 0 |
| Case 74 | 3 | 60,448,261 | 60,461,994 | 1 | 0 | 1 | 0 |
| Case 74 | 3 | 60,464,275 | 60,464,275 | 0 | 0 | 0 | 0 |
| Case 74 | 3 | 60,465,279 | 60,808,825 | 2 | 0 | 2 | 1 |
| Case 74 | 3 | 60,808,879 | 60,892,741 | 3 | 0 | 3 | 1 |
| Case 74 | 3 | 60,895,579 | 61,098,641 | 2 | 0 | 2 | 1 |
| Case 74 | 3 | 61,101,006 | 61,788,620 | 3 | 0 | 3 | 1 |
| Case 74 | 3 | 61,789,749 | 64,505,542 | 2 | 0 | 2 | 1 |
| Case 74 | 3 | 64,507,857 | 64,629,698 | 3 | 0 | 3 | 1 |
| Case 74 | 3 | 64,632,256 | 65,313,459 | 2 | 0 | 2 | 1 |
| Case 74 | 3 | 65,315,323 | 65,347,423 | 3 | 0 | 3 | 1 |
| Case 74 | 3 | 65,358,578 | 71,957,406 | 2 | 0 | 2 | 1 |
| Case 74 | 3 | 71,959,310 | 72,109,408 | 3 | 0 | 3 | 1 |
| Case 74 | 3 | 72,110,578 | 72,568,038 | 2 | 0 | 2 | 1 |

|         |   |             |             |   |   |   |   |
|---------|---|-------------|-------------|---|---|---|---|
| Case 74 | 3 | 72,568,369  | 72,648,980  | 3 | 0 | 3 | 1 |
| Case 74 | 3 | 72,649,326  | 77,309,810  | 2 | 0 | 2 | 1 |
| Case 74 | 3 | 77,317,940  | 77,365,899  | 1 | 0 | 1 | 0 |
| Case 74 | 3 | 77,369,911  | 84,056,075  | 2 | 0 | 2 | 1 |
| Case 74 | 3 | 84,063,290  | 84,747,008  | 3 | 0 | 3 | 1 |
| Case 74 | 3 | 84,767,271  | 86,511,758  | 2 | 0 | 2 | 1 |
| Case 74 | 3 | 86,526,422  | 86,749,427  | 2 | 1 | 3 | 0 |
| Case 74 | 3 | 86,752,414  | 87,842,202  | 2 | 2 | 4 | 0 |
| Case 74 | 3 | 87,854,277  | 90,442,925  | 2 | 1 | 3 | 0 |
| Case 74 | 3 | 93,537,290  | 95,441,803  | 2 | 1 | 3 | 0 |
| Case 74 | 3 | 95,455,361  | 98,385,816  | 3 | 1 | 4 | 0 |
| Case 74 | 3 | 98,386,666  | 99,602,555  | 2 | 1 | 3 | 0 |
| Case 74 | 3 | 99,614,626  | 99,649,840  | 2 | 0 | 2 | 1 |
| Case 74 | 3 | 99,649,860  | 109,265,353 | 2 | 1 | 3 | 0 |
| Case 74 | 3 | 109,270,100 | 109,873,808 | 3 | 1 | 4 | 0 |
| Case 74 | 3 | 109,877,966 | 110,146,216 | 4 | 1 | 5 | 0 |
| Case 74 | 3 | 110,148,936 | 111,189,285 | 3 | 1 | 4 | 0 |
| Case 74 | 3 | 111,193,516 | 111,898,502 | 2 | 1 | 3 | 0 |
| Case 74 | 3 | 111,899,409 | 112,516,328 | 3 | 1 | 4 | 0 |
| Case 74 | 3 | 112,519,276 | 113,769,097 | 2 | 1 | 3 | 0 |
| Case 74 | 3 | 113,772,448 | 119,413,700 | 2 | 2 | 4 | 0 |
| Case 74 | 3 | 119,413,823 | 119,603,162 | 2 | 1 | 3 | 0 |
| Case 74 | 3 | 119,606,078 | 121,315,380 | 2 | 2 | 4 | 0 |
| Case 74 | 3 | 121,315,813 | 121,412,618 | 2 | 1 | 3 | 0 |
| Case 74 | 3 | 121,412,702 | 127,298,941 | 2 | 2 | 4 | 0 |
| Case 74 | 3 | 127,304,957 | 127,411,436 | 2 | 1 | 3 | 0 |
| Case 74 | 3 | 127,412,573 | 127,895,226 | 3 | 1 | 4 | 0 |
| Case 74 | 3 | 127,911,077 | 141,647,359 | 2 | 1 | 3 | 0 |
| Case 74 | 3 | 141,654,200 | 141,933,649 | 1 | 1 | 2 | 0 |
| Case 74 | 3 | 141,937,953 | 145,300,490 | 2 | 1 | 3 | 0 |
| Case 74 | 3 | 145,312,260 | 145,572,381 | 3 | 1 | 4 | 0 |
| Case 74 | 3 | 145,581,255 | 145,921,145 | 2 | 1 | 3 | 0 |
| Case 74 | 3 | 145,921,954 | 145,939,878 | 2 | 0 | 2 | 1 |
| Case 74 | 3 | 145,948,249 | 156,004,954 | 2 | 1 | 3 | 0 |
| Case 74 | 3 | 156,007,973 | 156,098,920 | 3 | 1 | 4 | 0 |
| Case 74 | 3 | 156,105,173 | 157,289,766 | 2 | 1 | 3 | 0 |
| Case 74 | 3 | 157,290,908 | 157,537,988 | 2 | 2 | 4 | 0 |
| Case 74 | 3 | 157,538,373 | 160,519,718 | 2 | 1 | 3 | 0 |
| Case 74 | 3 | 160,520,986 | 163,048,842 | 2 | 2 | 4 | 0 |
| Case 74 | 3 | 163,058,603 | 164,267,629 | 2 | 1 | 3 | 0 |
| Case 74 | 3 | 164,269,269 | 164,474,373 | 2 | 2 | 4 | 0 |
| Case 74 | 3 | 164,515,528 | 164,907,679 | 2 | 1 | 3 | 0 |
| Case 74 | 3 | 164,908,092 | 168,496,750 | 2 | 2 | 4 | 0 |
| Case 74 | 3 | 168,520,843 | 168,698,220 | 3 | 2 | 5 | 0 |
| Case 74 | 3 | 168,715,048 | 169,213,559 | 2 | 2 | 4 | 0 |
| Case 74 | 3 | 169,216,068 | 169,253,993 | 3 | 2 | 5 | 0 |
| Case 74 | 3 | 169,257,233 | 176,824,755 | 2 | 2 | 4 | 0 |
| Case 74 | 3 | 176,827,927 | 176,990,782 | 3 | 2 | 5 | 0 |
| Case 74 | 3 | 177,014,231 | 177,282,809 | 2 | 2 | 4 | 0 |
| Case 74 | 3 | 177,286,946 | 177,346,796 | 2 | 1 | 3 | 0 |
| Case 74 | 3 | 177,346,889 | 180,320,085 | 2 | 2 | 4 | 0 |
| Case 74 | 3 | 180,320,132 | 180,334,458 | 2 | 1 | 3 | 0 |
| Case 74 | 3 | 180,337,082 | 183,547,415 | 2 | 2 | 4 | 0 |
| Case 74 | 3 | 183,551,123 | 183,607,661 | 2 | 1 | 3 | 0 |
| Case 74 | 3 | 183,621,991 | 183,822,003 | 2 | 2 | 4 | 0 |
| Case 74 | 3 | 183,822,145 | 184,121,187 | 2 | 1 | 3 | 0 |
| Case 74 | 3 | 184,125,634 | 184,515,299 | 2 | 2 | 4 | 0 |
| Case 74 | 3 | 184,517,445 | 184,901,819 | 2 | 1 | 3 | 0 |
| Case 74 | 3 | 184,906,201 | 185,043,280 | 2 | 2 | 4 | 0 |
| Case 74 | 3 | 185,048,314 | 185,232,284 | 2 | 1 | 3 | 0 |
| Case 74 | 3 | 185,234,543 | 186,247,373 | 2 | 2 | 4 | 0 |

|         |   |             |             |   |   |   |   |
|---------|---|-------------|-------------|---|---|---|---|
| Case 74 | 3 | 186,252,771 | 186,571,010 | 2 | 1 | 3 | 0 |
| Case 74 | 3 | 186,571,123 | 189,441,364 | 2 | 2 | 4 | 0 |
| Case 74 | 3 | 189,443,562 | 189,514,047 | 3 | 2 | 5 | 0 |
| Case 74 | 3 | 189,515,503 | 190,175,151 | 2 | 2 | 4 | 0 |
| Case 74 | 3 | 190,176,528 | 190,265,429 | 3 | 2 | 5 | 0 |
| Case 74 | 3 | 190,271,177 | 194,061,561 | 2 | 2 | 4 | 0 |
| Case 74 | 3 | 194,061,578 | 194,154,524 | 2 | 1 | 3 | 0 |
| Case 74 | 3 | 194,159,638 | 194,324,939 | 2 | 2 | 4 | 0 |
| Case 74 | 3 | 194,325,010 | 194,452,392 | 2 | 1 | 3 | 0 |
| Case 74 | 3 | 194,461,665 | 195,295,166 | 2 | 2 | 4 | 0 |
| Case 74 | 3 | 195,295,782 | 196,322,359 | 2 | 1 | 3 | 0 |
| Case 74 | 3 | 196,328,849 | 197,312,425 | 2 | 2 | 4 | 0 |
| Case 74 | 3 | 197,321,500 | 197,838,262 | 2 | 1 | 3 | 0 |
| Case 74 | 4 | 71,566      | 127,452     | 1 | 0 | 1 | 0 |
| Case 74 | 4 | 134,851     | 11,398,882  | 2 | 0 | 2 | 1 |
| Case 74 | 4 | 11,400,746  | 11,537,238  | 3 | 0 | 3 | 1 |
| Case 74 | 4 | 11,538,001  | 12,258,122  | 2 | 0 | 2 | 1 |
| Case 74 | 4 | 12,262,020  | 12,440,385  | 1 | 0 | 1 | 0 |
| Case 74 | 4 | 12,454,605  | 12,972,256  | 2 | 0 | 2 | 1 |
| Case 74 | 4 | 12,993,951  | 13,068,686  | 1 | 0 | 1 | 0 |
| Case 74 | 4 | 13,070,446  | 15,728,896  | 2 | 0 | 2 | 1 |
| Case 74 | 4 | 15,733,454  | 15,758,931  | 3 | 0 | 3 | 1 |
| Case 74 | 4 | 15,767,752  | 16,034,999  | 4 | 0 | 4 | 1 |
| Case 74 | 4 | 16,035,053  | 16,128,075  | 3 | 0 | 3 | 1 |
| Case 74 | 4 | 16,134,120  | 16,518,215  | 2 | 0 | 2 | 1 |
| Case 74 | 4 | 16,521,723  | 16,592,117  | 3 | 0 | 3 | 1 |
| Case 74 | 4 | 16,594,879  | 16,992,028  | 2 | 0 | 2 | 1 |
| Case 74 | 4 | 16,992,876  | 17,136,795  | 3 | 0 | 3 | 1 |
| Case 74 | 4 | 17,137,284  | 18,274,996  | 2 | 0 | 2 | 1 |
| Case 74 | 4 | 18,277,716  | 18,961,510  | 3 | 0 | 3 | 1 |
| Case 74 | 4 | 18,968,306  | 21,883,570  | 2 | 0 | 2 | 1 |
| Case 74 | 4 | 21,887,265  | 21,973,217  | 3 | 0 | 3 | 1 |
| Case 74 | 4 | 21,977,669  | 23,770,218  | 2 | 0 | 2 | 1 |
| Case 74 | 4 | 23,781,649  | 23,829,314  | 3 | 0 | 3 | 1 |
| Case 74 | 4 | 23,832,084  | 24,882,927  | 2 | 0 | 2 | 1 |
| Case 74 | 4 | 24,885,284  | 25,056,765  | 3 | 0 | 3 | 1 |
| Case 74 | 4 | 25,058,232  | 26,456,971  | 2 | 0 | 2 | 1 |
| Case 74 | 4 | 26,457,168  | 26,522,786  | 3 | 0 | 3 | 1 |
| Case 74 | 4 | 26,527,154  | 33,217,636  | 2 | 0 | 2 | 1 |
| Case 74 | 4 | 33,225,232  | 33,840,835  | 3 | 0 | 3 | 1 |
| Case 74 | 4 | 33,879,862  | 34,159,800  | 2 | 0 | 2 | 1 |
| Case 74 | 4 | 34,195,504  | 34,841,364  | 3 | 0 | 3 | 1 |
| Case 74 | 4 | 34,846,207  | 37,382,184  | 2 | 0 | 2 | 1 |
| Case 74 | 4 | 37,384,644  | 37,471,031  | 3 | 0 | 3 | 1 |
| Case 74 | 4 | 37,471,169  | 38,689,042  | 2 | 0 | 2 | 1 |
| Case 74 | 4 | 38,690,488  | 38,774,785  | 3 | 0 | 3 | 1 |
| Case 74 | 4 | 38,774,816  | 40,189,325  | 2 | 0 | 2 | 1 |
| Case 74 | 4 | 40,190,463  | 40,227,671  | 3 | 0 | 3 | 1 |
| Case 74 | 4 | 40,242,433  | 41,613,931  | 2 | 0 | 2 | 1 |
| Case 74 | 4 | 41,614,803  | 41,703,388  | 3 | 0 | 3 | 1 |
| Case 74 | 4 | 41,707,093  | 49,620,898  | 2 | 0 | 2 | 1 |
| Case 74 | 4 | 52,697,856  | 53,893,156  | 2 | 0 | 2 | 1 |
| Case 74 | 4 | 53,907,444  | 55,073,673  | 4 | 1 | 5 | 0 |
| Case 74 | 4 | 55,074,368  | 55,161,517  | 2 | 2 | 4 | 0 |
| Case 74 | 4 | 55,162,271  | 57,173,735  | 3 | 2 | 5 | 0 |
| Case 74 | 4 | 57,173,791  | 57,442,004  | 2 | 2 | 4 | 0 |
| Case 74 | 4 | 57,444,413  | 67,904,595  | 3 | 2 | 5 | 0 |
| Case 74 | 4 | 67,906,156  | 67,921,630  | 2 | 2 | 4 | 0 |
| Case 74 | 4 | 67,925,197  | 68,039,482  | 2 | 0 | 2 | 1 |
| Case 74 | 4 | 68,056,613  | 73,295,961  | 2 | 2 | 4 | 0 |
| Case 74 | 4 | 73,328,204  | 74,351,777  | 4 | 1 | 5 | 0 |

|         |   |             |             |   |   |   |   |
|---------|---|-------------|-------------|---|---|---|---|
| Case 74 | 4 | 74,352,799  | 75,248,373  | 3 | 2 | 5 | 0 |
| Case 74 | 4 | 75,248,434  | 76,452,302  | 4 | 2 | 6 | 0 |
| Case 74 | 4 | 76,452,357  | 77,601,715  | 4 | 1 | 5 | 0 |
| Case 74 | 4 | 77,612,903  | 77,619,296  | 2 | 2 | 4 | 0 |
| Case 74 | 4 | 77,621,705  | 78,211,866  | 3 | 2 | 5 | 0 |
| Case 74 | 4 | 78,216,136  | 78,216,136  | 2 | 2 | 4 | 0 |
| Case 74 | 4 | 78,227,999  | 78,413,360  | 3 | 0 | 3 | 1 |
| Case 74 | 4 | 78,417,537  | 78,970,022  | 2 | 0 | 2 | 1 |
| Case 74 | 4 | 78,970,864  | 79,188,584  | 3 | 0 | 3 | 1 |
| Case 74 | 4 | 79,198,744  | 82,126,173  | 2 | 0 | 2 | 1 |
| Case 74 | 4 | 82,133,264  | 82,432,524  | 3 | 0 | 3 | 1 |
| Case 74 | 4 | 82,440,730  | 82,962,095  | 2 | 0 | 2 | 1 |
| Case 74 | 4 | 82,964,509  | 83,102,836  | 3 | 0 | 3 | 1 |
| Case 74 | 4 | 83,112,989  | 85,282,675  | 2 | 0 | 2 | 1 |
| Case 74 | 4 | 85,283,718  | 85,469,315  | 3 | 0 | 3 | 1 |
| Case 74 | 4 | 85,475,077  | 87,749,312  | 2 | 0 | 2 | 1 |
| Case 74 | 4 | 87,752,976  | 88,041,256  | 3 | 0 | 3 | 1 |
| Case 74 | 4 | 88,046,210  | 88,433,880  | 2 | 0 | 2 | 1 |
| Case 74 | 4 | 88,435,789  | 88,687,693  | 3 | 0 | 3 | 1 |
| Case 74 | 4 | 88,689,765  | 90,124,654  | 2 | 0 | 2 | 1 |
| Case 74 | 4 | 90,125,419  | 90,168,825  | 1 | 0 | 1 | 0 |
| Case 74 | 4 | 90,168,945  | 90,170,094  | 2 | 0 | 2 | 1 |
| Case 74 | 4 | 90,170,097  | 90,170,118  | 1 | 0 | 1 | 0 |
| Case 74 | 4 | 90,170,129  | 90,171,075  | 2 | 0 | 2 | 1 |
| Case 74 | 4 | 90,171,113  | 90,271,977  | 1 | 0 | 1 | 0 |
| Case 74 | 4 | 90,272,120  | 90,374,397  | 2 | 0 | 2 | 1 |
| Case 74 | 4 | 90,375,951  | 90,426,646  | 1 | 0 | 1 | 0 |
| Case 74 | 4 | 90,428,054  | 90,432,177  | 2 | 0 | 2 | 1 |
| Case 74 | 4 | 90,432,746  | 91,000,334  | 1 | 0 | 1 | 0 |
| Case 74 | 4 | 91,025,850  | 92,572,499  | 2 | 1 | 3 | 0 |
| Case 74 | 4 | 92,591,560  | 92,803,775  | 1 | 0 | 1 | 0 |
| Case 74 | 4 | 92,816,815  | 93,118,886  | 0 | 0 | 0 | 0 |
| Case 74 | 4 | 93,136,397  | 93,458,820  | 1 | 0 | 1 | 0 |
| Case 74 | 4 | 93,467,486  | 136,778,939 | 2 | 1 | 3 | 0 |
| Case 74 | 4 | 136,818,726 | 136,958,364 | 2 | 2 | 4 | 0 |
| Case 74 | 4 | 136,978,022 | 136,978,022 | 2 | 1 | 3 | 0 |
| Case 74 | 4 | 136,984,338 | 137,088,592 | 1 | 0 | 1 | 0 |
| Case 74 | 4 | 137,105,336 | 137,105,336 | 2 | 0 | 2 | 1 |
| Case 74 | 4 | 137,115,636 | 140,272,383 | 4 | 1 | 5 | 0 |
| Case 74 | 4 | 140,289,285 | 142,677,084 | 3 | 1 | 4 | 0 |
| Case 74 | 4 | 142,682,770 | 143,488,095 | 4 | 1 | 5 | 0 |
| Case 74 | 4 | 143,493,559 | 144,406,061 | 3 | 1 | 4 | 0 |
| Case 74 | 4 | 144,412,846 | 148,654,651 | 4 | 1 | 5 | 0 |
| Case 74 | 4 | 148,658,108 | 148,990,995 | 3 | 1 | 4 | 0 |
| Case 74 | 4 | 148,997,402 | 151,918,331 | 4 | 1 | 5 | 0 |
| Case 74 | 4 | 151,935,601 | 153,069,783 | 3 | 1 | 4 | 0 |
| Case 74 | 4 | 153,075,234 | 154,066,319 | 4 | 1 | 5 | 0 |
| Case 74 | 4 | 154,075,881 | 154,371,262 | 1 | 0 | 1 | 0 |
| Case 74 | 4 | 154,373,196 | 154,465,994 | 2 | 0 | 2 | 1 |
| Case 74 | 4 | 154,466,939 | 154,632,838 | 1 | 0 | 1 | 0 |
| Case 74 | 4 | 154,633,708 | 154,827,974 | 2 | 0 | 2 | 1 |
| Case 74 | 4 | 154,828,366 | 155,154,936 | 1 | 0 | 1 | 0 |
| Case 74 | 4 | 155,155,797 | 155,158,284 | 2 | 0 | 2 | 1 |
| Case 74 | 4 | 155,160,429 | 155,209,141 | 1 | 0 | 1 | 0 |
| Case 74 | 4 | 155,216,371 | 155,241,740 | 2 | 0 | 2 | 1 |
| Case 74 | 4 | 155,242,011 | 155,249,362 | 1 | 0 | 1 | 0 |
| Case 74 | 4 | 155,250,701 | 155,256,205 | 2 | 0 | 2 | 1 |
| Case 74 | 4 | 155,256,251 | 155,410,650 | 1 | 0 | 1 | 0 |
| Case 74 | 4 | 155,410,667 | 155,414,923 | 2 | 0 | 2 | 1 |
| Case 74 | 4 | 155,420,487 | 155,545,072 | 1 | 0 | 1 | 0 |
| Case 74 | 4 | 155,548,453 | 155,665,881 | 2 | 0 | 2 | 1 |



|         |   |             |             |   |   |   |   |
|---------|---|-------------|-------------|---|---|---|---|
| Case 74 | 4 | 155,668,710 | 156,135,350 | 1 | 0 | 1 | 0 |
| Case 74 | 4 | 156,135,605 | 156,159,411 | 2 | 0 | 2 | 1 |
| Case 74 | 4 | 156,162,049 | 157,825,397 | 1 | 0 | 1 | 0 |
| Case 74 | 4 | 157,836,610 | 157,886,145 | 2 | 0 | 2 | 1 |
| Case 74 | 4 | 157,891,943 | 159,634,297 | 1 | 0 | 1 | 0 |
| Case 74 | 4 | 159,635,244 | 159,804,265 | 2 | 0 | 2 | 1 |
| Case 74 | 4 | 159,812,658 | 160,274,698 | 1 | 0 | 1 | 0 |
| Case 74 | 4 | 160,274,740 | 160,374,255 | 2 | 0 | 2 | 1 |
| Case 74 | 4 | 160,377,484 | 161,778,204 | 1 | 0 | 1 | 0 |
| Case 74 | 4 | 161,783,422 | 161,783,422 | 3 | 1 | 4 | 0 |
| Case 74 | 4 | 161,785,031 | 162,281,985 | 4 | 1 | 5 | 0 |
| Case 74 | 4 | 162,284,626 | 166,588,960 | 3 | 1 | 4 | 0 |
| Case 74 | 4 | 166,591,321 | 166,827,464 | 4 | 1 | 5 | 0 |
| Case 74 | 4 | 166,830,580 | 168,166,789 | 3 | 1 | 4 | 0 |
| Case 74 | 4 | 168,169,259 | 168,545,366 | 4 | 1 | 5 | 0 |
| Case 74 | 4 | 168,545,610 | 174,731,952 | 3 | 1 | 4 | 0 |
| Case 74 | 4 | 174,741,938 | 175,122,454 | 4 | 1 | 5 | 0 |
| Case 74 | 4 | 175,125,617 | 177,123,850 | 3 | 1 | 4 | 0 |
| Case 74 | 4 | 177,126,245 | 177,256,699 | 4 | 1 | 5 | 0 |
| Case 74 | 4 | 177,259,635 | 180,257,370 | 3 | 1 | 4 | 0 |
| Case 74 | 4 | 180,263,649 | 186,357,523 | 2 | 1 | 3 | 0 |
| Case 74 | 4 | 186,365,998 | 186,507,409 | 4 | 1 | 5 | 0 |
| Case 74 | 4 | 186,508,808 | 186,583,323 | 3 | 1 | 4 | 0 |
| Case 74 | 4 | 186,583,330 | 187,084,023 | 4 | 1 | 5 | 0 |
| Case 74 | 4 | 187,084,086 | 187,207,381 | 3 | 1 | 4 | 0 |
| Case 74 | 4 | 187,207,613 | 187,445,552 | 4 | 1 | 5 | 0 |
| Case 74 | 4 | 187,449,434 | 187,668,886 | 3 | 1 | 4 | 0 |
| Case 74 | 4 | 187,672,156 | 188,223,037 | 4 | 1 | 5 | 0 |
| Case 74 | 4 | 188,223,165 | 188,597,930 | 3 | 1 | 4 | 0 |
| Case 74 | 4 | 188,608,123 | 188,894,402 | 4 | 1 | 5 | 0 |
| Case 74 | 4 | 188,898,937 | 189,070,726 | 3 | 1 | 4 | 0 |
| Case 74 | 4 | 189,081,654 | 190,552,585 | 4 | 1 | 5 | 0 |
| Case 74 | 4 | 190,641,170 | 190,963,766 | 2 | 2 | 4 | 0 |
| Case 74 | 5 | 38,139      | 18,272,737  | 2 | 1 | 3 | 0 |
| Case 74 | 5 | 18,277,597  | 22,078,724  | 1 | 1 | 2 | 0 |
| Case 74 | 5 | 22,081,601  | 22,119,976  | 2 | 1 | 3 | 0 |
| Case 74 | 5 | 22,156,155  | 22,458,871  | 1 | 0 | 1 | 0 |
| Case 74 | 5 | 22,472,039  | 22,472,039  | 2 | 1 | 3 | 0 |
| Case 74 | 5 | 22,474,350  | 28,286,502  | 1 | 1 | 2 | 0 |
| Case 74 | 5 | 28,292,827  | 28,561,546  | 2 | 1 | 3 | 0 |
| Case 74 | 5 | 28,573,939  | 32,015,725  | 1 | 1 | 2 | 0 |
| Case 74 | 5 | 32,028,324  | 34,871,161  | 2 | 1 | 3 | 0 |
| Case 74 | 5 | 34,878,150  | 38,407,060  | 1 | 1 | 2 | 0 |
| Case 74 | 5 | 38,407,230  | 38,475,507  | 2 | 1 | 3 | 0 |
| Case 74 | 5 | 38,481,335  | 46,399,093  | 1 | 1 | 2 | 0 |
| Case 74 | 5 | 49,457,282  | 49,806,042  | 1 | 1 | 2 | 0 |
| Case 74 | 5 | 49,807,182  | 49,988,020  | 2 | 1 | 3 | 0 |
| Case 74 | 5 | 49,991,561  | 60,063,694  | 1 | 1 | 2 | 0 |
| Case 74 | 5 | 60,065,519  | 60,065,519  | 2 | 1 | 3 | 0 |
| Case 74 | 5 | 60,074,000  | 60,135,985  | 1 | 0 | 1 | 0 |
| Case 74 | 5 | 60,147,754  | 60,194,107  | 0 | 0 | 0 | 0 |
| Case 74 | 5 | 60,195,517  | 60,329,624  | 1 | 0 | 1 | 0 |
| Case 74 | 5 | 60,336,004  | 60,356,423  | 2 | 1 | 3 | 0 |
| Case 74 | 5 | 60,357,869  | 73,710,424  | 1 | 1 | 2 | 0 |
| Case 74 | 5 | 73,712,303  | 73,722,209  | 2 | 1 | 3 | 0 |
| Case 74 | 5 | 73,735,096  | 73,918,616  | 3 | 1 | 4 | 0 |
| Case 74 | 5 | 73,922,463  | 74,026,093  | 2 | 1 | 3 | 0 |
| Case 74 | 5 | 74,030,338  | 82,422,643  | 1 | 1 | 2 | 0 |
| Case 74 | 5 | 82,436,811  | 82,436,811  | 2 | 1 | 3 | 0 |
| Case 74 | 5 | 82,440,199  | 82,624,287  | 1 | 0 | 1 | 0 |
| Case 74 | 5 | 82,626,919  | 82,633,951  | 2 | 1 | 3 | 0 |

|         |   |             |             |   |   |   |   |
|---------|---|-------------|-------------|---|---|---|---|
| Case 74 | 5 | 82,636,062  | 86,507,043  | 1 | 1 | 2 | 0 |
| Case 74 | 5 | 86,518,243  | 89,523,637  | 2 | 1 | 3 | 0 |
| Case 74 | 5 | 89,523,688  | 90,464,235  | 3 | 1 | 4 | 0 |
| Case 74 | 5 | 90,466,296  | 92,496,410  | 2 | 1 | 3 | 0 |
| Case 74 | 5 | 92,498,577  | 92,611,658  | 1 | 1 | 2 | 0 |
| Case 74 | 5 | 92,617,660  | 103,914,523 | 2 | 1 | 3 | 0 |
| Case 74 | 5 | 103,919,615 | 104,253,119 | 1 | 1 | 2 | 0 |
| Case 74 | 5 | 104,269,333 | 110,782,456 | 2 | 1 | 3 | 0 |
| Case 74 | 5 | 110,784,900 | 110,872,150 | 1 | 1 | 2 | 0 |
| Case 74 | 5 | 110,874,123 | 118,624,190 | 2 | 1 | 3 | 0 |
| Case 74 | 5 | 118,624,941 | 118,827,601 | 3 | 1 | 4 | 0 |
| Case 74 | 5 | 118,835,058 | 145,139,783 | 2 | 1 | 3 | 0 |
| Case 74 | 5 | 145,139,816 | 145,310,336 | 2 | 2 | 4 | 0 |
| Case 74 | 5 | 145,313,920 | 145,643,048 | 2 | 1 | 3 | 0 |
| Case 74 | 5 | 145,647,151 | 148,619,424 | 2 | 2 | 4 | 0 |
| Case 74 | 5 | 148,620,240 | 149,006,760 | 2 | 1 | 3 | 0 |
| Case 74 | 5 | 149,006,842 | 149,206,104 | 2 | 2 | 4 | 0 |
| Case 74 | 5 | 149,208,768 | 149,786,496 | 2 | 1 | 3 | 0 |
| Case 74 | 5 | 149,786,499 | 149,998,248 | 2 | 2 | 4 | 0 |
| Case 74 | 5 | 150,000,145 | 150,167,118 | 2 | 1 | 3 | 0 |
| Case 74 | 5 | 150,170,609 | 150,557,223 | 2 | 2 | 4 | 0 |
| Case 74 | 5 | 150,557,431 | 150,731,552 | 2 | 1 | 3 | 0 |
| Case 74 | 5 | 150,734,518 | 150,845,369 | 2 | 2 | 4 | 0 |
| Case 74 | 5 | 150,846,761 | 150,948,016 | 2 | 1 | 3 | 0 |
| Case 74 | 5 | 150,948,224 | 154,091,904 | 2 | 2 | 4 | 0 |
| Case 74 | 5 | 154,092,202 | 154,396,838 | 2 | 1 | 3 | 0 |
| Case 74 | 5 | 154,403,211 | 156,479,204 | 2 | 2 | 4 | 0 |
| Case 74 | 5 | 156,479,402 | 156,608,913 | 2 | 1 | 3 | 0 |
| Case 74 | 5 | 156,609,000 | 159,776,311 | 2 | 2 | 4 | 0 |
| Case 74 | 5 | 159,776,507 | 160,173,130 | 2 | 1 | 3 | 0 |
| Case 74 | 5 | 160,173,283 | 162,866,548 | 2 | 2 | 4 | 0 |
| Case 74 | 5 | 162,867,195 | 162,989,613 | 2 | 1 | 3 | 0 |
| Case 74 | 5 | 162,989,974 | 164,695,671 | 2 | 2 | 4 | 0 |
| Case 74 | 5 | 164,696,018 | 164,799,990 | 2 | 1 | 3 | 0 |
| Case 74 | 5 | 164,800,668 | 167,618,804 | 2 | 2 | 4 | 0 |
| Case 74 | 5 | 167,618,989 | 167,798,135 | 2 | 1 | 3 | 0 |
| Case 74 | 5 | 167,798,585 | 167,842,039 | 2 | 2 | 4 | 0 |
| Case 74 | 5 | 167,844,236 | 168,123,345 | 2 | 1 | 3 | 0 |
| Case 74 | 5 | 168,123,398 | 168,990,341 | 2 | 2 | 4 | 0 |
| Case 74 | 5 | 169,004,471 | 169,031,218 | 2 | 1 | 3 | 0 |
| Case 74 | 5 | 169,062,922 | 169,632,261 | 2 | 2 | 4 | 0 |
| Case 74 | 5 | 169,632,349 | 169,743,246 | 2 | 1 | 3 | 0 |
| Case 74 | 5 | 169,743,561 | 170,232,777 | 2 | 2 | 4 | 0 |
| Case 74 | 5 | 170,233,262 | 170,726,798 | 2 | 1 | 3 | 0 |
| Case 74 | 5 | 170,732,406 | 170,983,223 | 2 | 2 | 4 | 0 |
| Case 74 | 5 | 170,992,935 | 171,547,550 | 2 | 1 | 3 | 0 |
| Case 74 | 5 | 171,552,219 | 171,626,110 | 2 | 2 | 4 | 0 |
| Case 74 | 5 | 171,627,391 | 171,867,995 | 2 | 1 | 3 | 0 |
| Case 74 | 5 | 171,876,084 | 172,382,902 | 2 | 2 | 4 | 0 |
| Case 74 | 5 | 172,385,569 | 172,590,824 | 2 | 1 | 3 | 0 |
| Case 74 | 5 | 172,591,337 | 172,693,710 | 2 | 2 | 4 | 0 |
| Case 74 | 5 | 172,699,491 | 173,138,928 | 2 | 1 | 3 | 0 |
| Case 74 | 5 | 173,141,093 | 175,030,363 | 2 | 2 | 4 | 0 |
| Case 74 | 5 | 175,031,628 | 175,174,842 | 2 | 1 | 3 | 0 |
| Case 74 | 5 | 175,176,876 | 175,275,598 | 2 | 2 | 4 | 0 |
| Case 74 | 5 | 175,279,492 | 176,133,254 | 2 | 1 | 3 | 0 |
| Case 74 | 5 | 176,133,680 | 176,212,290 | 2 | 2 | 4 | 0 |
| Case 74 | 5 | 176,212,812 | 177,679,555 | 2 | 1 | 3 | 0 |
| Case 74 | 5 | 177,679,654 | 177,852,582 | 2 | 2 | 4 | 0 |
| Case 74 | 5 | 177,854,235 | 178,089,232 | 2 | 1 | 3 | 0 |
| Case 74 | 5 | 178,090,194 | 178,303,868 | 2 | 2 | 4 | 0 |

|         |   |             |             |   |   |   |   |
|---------|---|-------------|-------------|---|---|---|---|
| Case 74 | 5 | 178,309,848 | 178,713,712 | 2 | 1 | 3 | 0 |
| Case 74 | 5 | 178,716,389 | 179,131,143 | 2 | 2 | 4 | 0 |
| Case 74 | 5 | 179,135,353 | 179,604,217 | 2 | 1 | 3 | 0 |
| Case 74 | 5 | 179,607,388 | 179,899,660 | 2 | 2 | 4 | 0 |
| Case 74 | 5 | 179,903,288 | 180,485,353 | 2 | 1 | 3 | 0 |
| Case 74 | 5 | 180,485,720 | 180,582,003 | 2 | 2 | 4 | 0 |
| Case 74 | 5 | 180,582,043 | 180,693,127 | 2 | 1 | 3 | 0 |
| Case 74 | 6 | 108,666     | 29,540,204  | 2 | 1 | 3 | 0 |
| Case 74 | 6 | 29,540,745  | 30,004,052  | 3 | 0 | 3 | 1 |
| Case 74 | 6 | 30,004,849  | 41,469,071  | 2 | 1 | 3 | 0 |
| Case 74 | 6 | 41,474,727  | 41,731,177  | 2 | 2 | 4 | 0 |
| Case 74 | 6 | 41,735,468  | 41,908,122  | 2 | 1 | 3 | 0 |
| Case 74 | 6 | 41,910,064  | 42,068,171  | 2 | 2 | 4 | 0 |
| Case 74 | 6 | 42,068,975  | 42,237,177  | 2 | 1 | 3 | 0 |
| Case 74 | 6 | 42,240,369  | 42,992,825  | 2 | 2 | 4 | 0 |
| Case 74 | 6 | 42,993,027  | 43,030,755  | 2 | 1 | 3 | 0 |
| Case 74 | 6 | 43,030,791  | 43,144,618  | 2 | 2 | 4 | 0 |
| Case 74 | 6 | 43,146,387  | 43,188,940  | 2 | 1 | 3 | 0 |
| Case 74 | 6 | 43,189,433  | 43,304,912  | 2 | 2 | 4 | 0 |
| Case 74 | 6 | 43,305,008  | 43,682,990  | 2 | 1 | 3 | 0 |
| Case 74 | 6 | 43,683,804  | 44,032,331  | 2 | 2 | 4 | 0 |
| Case 74 | 6 | 44,034,691  | 44,134,540  | 2 | 1 | 3 | 0 |
| Case 74 | 6 | 44,134,864  | 44,211,867  | 2 | 2 | 4 | 0 |
| Case 74 | 6 | 44,214,417  | 44,272,485  | 2 | 1 | 3 | 0 |
| Case 74 | 6 | 44,272,513  | 45,011,305  | 2 | 2 | 4 | 0 |
| Case 74 | 6 | 45,038,760  | 56,150,940  | 2 | 1 | 3 | 0 |
| Case 74 | 6 | 56,152,943  | 56,234,843  | 1 | 1 | 2 | 0 |
| Case 74 | 6 | 56,235,411  | 58,752,089  | 2 | 1 | 3 | 0 |
| Case 74 | 6 | 61,891,118  | 78,965,525  | 2 | 1 | 3 | 0 |
| Case 74 | 6 | 78,972,930  | 79,029,367  | 1 | 0 | 1 | 0 |
| Case 74 | 6 | 79,039,234  | 84,117,512  | 2 | 1 | 3 | 0 |
| Case 74 | 6 | 84,119,361  | 84,387,250  | 3 | 1 | 4 | 0 |
| Case 74 | 6 | 84,393,942  | 96,621,271  | 2 | 1 | 3 | 0 |
| Case 74 | 6 | 96,622,433  | 96,850,379  | 3 | 1 | 4 | 0 |
| Case 74 | 6 | 96,853,579  | 125,550,313 | 2 | 1 | 3 | 0 |
| Case 74 | 6 | 125,550,328 | 125,585,976 | 2 | 2 | 4 | 0 |
| Case 74 | 6 | 125,587,961 | 126,202,315 | 2 | 1 | 3 | 0 |
| Case 74 | 6 | 126,209,245 | 126,307,962 | 2 | 2 | 4 | 0 |
| Case 74 | 6 | 126,317,137 | 170,980,171 | 2 | 1 | 3 | 0 |
| Case 74 | 7 | 44,935      | 203,326     | 2 | 2 | 4 | 0 |
| Case 74 | 7 | 212,512     | 1,548,225   | 2 | 1 | 3 | 0 |
| Case 74 | 7 | 1,551,716   | 1,583,288   | 2 | 2 | 4 | 0 |
| Case 74 | 7 | 1,586,617   | 2,483,135   | 2 | 1 | 3 | 0 |
| Case 74 | 7 | 2,486,004   | 2,557,266   | 2 | 2 | 4 | 0 |
| Case 74 | 7 | 2,560,777   | 2,962,914   | 2 | 1 | 3 | 0 |
| Case 74 | 7 | 2,962,933   | 3,839,029   | 2 | 2 | 4 | 0 |
| Case 74 | 7 | 3,848,455   | 4,277,374   | 2 | 1 | 3 | 0 |
| Case 74 | 7 | 4,279,500   | 4,665,570   | 2 | 2 | 4 | 0 |
| Case 74 | 7 | 4,667,201   | 4,877,012   | 2 | 1 | 3 | 0 |
| Case 74 | 7 | 4,880,954   | 4,947,191   | 2 | 2 | 4 | 0 |
| Case 74 | 7 | 4,955,626   | 6,196,411   | 2 | 1 | 3 | 0 |
| Case 74 | 7 | 6,196,414   | 6,370,025   | 2 | 2 | 4 | 0 |
| Case 74 | 7 | 6,370,167   | 6,517,440   | 2 | 1 | 3 | 0 |
| Case 74 | 7 | 6,520,676   | 41,615,988  | 2 | 2 | 4 | 0 |
| Case 74 | 7 | 41,617,294  | 42,228,900  | 2 | 1 | 3 | 0 |
| Case 74 | 7 | 42,229,946  | 44,444,119  | 2 | 2 | 4 | 0 |
| Case 74 | 7 | 44,444,122  | 44,874,113  | 3 | 1 | 4 | 0 |
| Case 74 | 7 | 44,914,229  | 44,925,896  | 3 | 2 | 5 | 0 |
| Case 74 | 7 | 44,932,538  | 46,074,194  | 2 | 2 | 4 | 0 |
| Case 74 | 7 | 46,076,308  | 47,015,402  | 3 | 2 | 5 | 0 |
| Case 74 | 7 | 47,020,795  | 49,378,273  | 2 | 2 | 4 | 0 |

|         |   |             |             |   |   |   |   |
|---------|---|-------------|-------------|---|---|---|---|
| Case 74 | 7 | 49,403,143  | 49,792,290  | 3 | 2 | 5 | 0 |
| Case 74 | 7 | 49,799,927  | 51,728,439  | 2 | 2 | 4 | 0 |
| Case 74 | 7 | 51,730,710  | 52,722,258  | 3 | 2 | 5 | 0 |
| Case 74 | 7 | 52,722,432  | 52,995,901  | 2 | 2 | 4 | 0 |
| Case 74 | 7 | 52,996,013  | 53,103,729  | 3 | 2 | 5 | 0 |
| Case 74 | 7 | 53,103,766  | 54,254,685  | 2 | 2 | 4 | 0 |
| Case 74 | 7 | 54,265,587  | 54,600,112  | 3 | 2 | 5 | 0 |
| Case 74 | 7 | 54,610,293  | 58,019,061  | 2 | 2 | 4 | 0 |
| Case 74 | 7 | 61,056,053  | 61,138,655  | 2 | 2 | 4 | 0 |
| Case 74 | 7 | 61,747,794  | 62,510,311  | 3 | 2 | 5 | 0 |
| Case 74 | 7 | 62,517,629  | 62,577,770  | 2 | 2 | 4 | 0 |
| Case 74 | 7 | 62,627,173  | 63,847,894  | 3 | 0 | 3 | 1 |
| Case 74 | 7 | 63,852,980  | 65,225,195  | 2 | 0 | 2 | 1 |
| Case 74 | 7 | 65,264,080  | 65,453,292  | 3 | 0 | 3 | 1 |
| Case 74 | 7 | 65,466,565  | 67,565,499  | 2 | 0 | 2 | 1 |
| Case 74 | 7 | 67,567,429  | 69,946,964  | 3 | 0 | 3 | 1 |
| Case 74 | 7 | 69,954,583  | 70,271,908  | 4 | 0 | 4 | 1 |
| Case 74 | 7 | 70,274,757  | 108,552,644 | 3 | 0 | 3 | 1 |
| Case 74 | 7 | 108,586,855 | 108,700,623 | 4 | 0 | 4 | 1 |
| Case 74 | 7 | 108,713,889 | 121,728,068 | 3 | 0 | 3 | 1 |
| Case 74 | 7 | 121,731,889 | 121,787,676 | 1 | 0 | 1 | 0 |
| Case 74 | 7 | 121,790,934 | 121,790,934 | 2 | 0 | 2 | 1 |
| Case 74 | 7 | 121,797,265 | 133,859,327 | 3 | 0 | 3 | 1 |
| Case 74 | 7 | 133,863,343 | 139,540,293 | 4 | 0 | 4 | 1 |
| Case 74 | 7 | 139,540,467 | 139,675,510 | 3 | 0 | 3 | 1 |
| Case 74 | 7 | 139,676,574 | 140,219,044 | 4 | 0 | 4 | 1 |
| Case 74 | 7 | 140,221,699 | 140,402,722 | 3 | 0 | 3 | 1 |
| Case 74 | 7 | 140,405,706 | 142,827,954 | 4 | 0 | 4 | 1 |
| Case 74 | 7 | 142,829,211 | 143,017,771 | 3 | 0 | 3 | 1 |
| Case 74 | 7 | 143,017,807 | 145,717,550 | 4 | 0 | 4 | 1 |
| Case 74 | 7 | 145,719,949 | 145,773,791 | 3 | 0 | 3 | 1 |
| Case 74 | 7 | 145,777,665 | 146,056,420 | 4 | 0 | 4 | 1 |
| Case 74 | 7 | 146,058,754 | 146,222,865 | 3 | 0 | 3 | 1 |
| Case 74 | 7 | 146,223,131 | 146,439,869 | 2 | 0 | 2 | 1 |
| Case 74 | 7 | 146,451,338 | 146,516,749 | 4 | 0 | 4 | 1 |
| Case 74 | 7 | 146,525,288 | 146,677,310 | 2 | 0 | 2 | 1 |
| Case 74 | 7 | 146,682,211 | 146,687,912 | 1 | 0 | 1 | 0 |
| Case 74 | 7 | 146,688,750 | 146,751,925 | 0 | 0 | 0 | 0 |
| Case 74 | 7 | 146,759,484 | 147,398,856 | 2 | 0 | 2 | 1 |
| Case 74 | 7 | 147,405,082 | 147,955,394 | 4 | 0 | 4 | 1 |
| Case 74 | 7 | 147,956,916 | 148,069,482 | 3 | 0 | 3 | 1 |
| Case 74 | 7 | 148,080,647 | 148,768,543 | 4 | 0 | 4 | 1 |
| Case 74 | 7 | 148,768,570 | 148,948,124 | 3 | 0 | 3 | 1 |
| Case 74 | 7 | 148,949,817 | 149,367,798 | 4 | 0 | 4 | 1 |
| Case 74 | 7 | 149,379,276 | 150,177,524 | 3 | 0 | 3 | 1 |
| Case 74 | 7 | 150,182,338 | 150,412,100 | 4 | 0 | 4 | 1 |
| Case 74 | 7 | 150,412,317 | 151,140,431 | 3 | 0 | 3 | 1 |
| Case 74 | 7 | 151,140,792 | 151,859,288 | 4 | 0 | 4 | 1 |
| Case 74 | 7 | 151,859,420 | 151,970,945 | 3 | 0 | 3 | 1 |
| Case 74 | 7 | 152,003,627 | 157,278,764 | 4 | 0 | 4 | 1 |
| Case 74 | 7 | 157,279,376 | 159,119,486 | 3 | 0 | 3 | 1 |
| Case 74 | 8 | 164,984     | 12,770,006  | 2 | 0 | 2 | 1 |
| Case 74 | 8 | 12,772,901  | 12,832,636  | 3 | 0 | 3 | 1 |
| Case 74 | 8 | 12,834,194  | 17,174,534  | 2 | 0 | 2 | 1 |
| Case 74 | 8 | 17,174,912  | 17,244,051  | 3 | 0 | 3 | 1 |
| Case 74 | 8 | 17,244,248  | 26,472,655  | 2 | 0 | 2 | 1 |
| Case 74 | 8 | 26,473,403  | 26,638,910  | 3 | 0 | 3 | 1 |
| Case 74 | 8 | 26,641,025  | 42,275,455  | 2 | 0 | 2 | 1 |
| Case 74 | 8 | 42,275,517  | 43,674,370  | 4 | 1 | 5 | 0 |
| Case 74 | 8 | 43,740,939  | 43,791,691  | 2 | 0 | 2 | 1 |
| Case 74 | 8 | 46,886,735  | 47,060,602  | 2 | 2 | 4 | 0 |

|         |   |             |             |   |   |   |   |
|---------|---|-------------|-------------|---|---|---|---|
| Case 74 | 8 | 47,060,977  | 48,124,855  | 3 | 2 | 5 | 0 |
| Case 74 | 8 | 48,129,224  | 49,987,801  | 2 | 2 | 4 | 0 |
| Case 74 | 8 | 49,988,587  | 50,290,167  | 3 | 2 | 5 | 0 |
| Case 74 | 8 | 50,294,735  | 51,465,681  | 2 | 2 | 4 | 0 |
| Case 74 | 8 | 51,465,733  | 52,027,473  | 3 | 2 | 5 | 0 |
| Case 74 | 8 | 52,028,112  | 52,791,790  | 2 | 2 | 4 | 0 |
| Case 74 | 8 | 52,806,682  | 53,376,653  | 3 | 2 | 5 | 0 |
| Case 74 | 8 | 53,376,852  | 53,902,717  | 2 | 2 | 4 | 0 |
| Case 74 | 8 | 53,903,947  | 54,105,645  | 3 | 2 | 5 | 0 |
| Case 74 | 8 | 54,108,225  | 56,717,568  | 2 | 2 | 4 | 0 |
| Case 74 | 8 | 56,722,691  | 56,825,385  | 3 | 2 | 5 | 0 |
| Case 74 | 8 | 56,826,016  | 57,654,447  | 2 | 2 | 4 | 0 |
| Case 74 | 8 | 57,655,067  | 58,077,248  | 3 | 2 | 5 | 0 |
| Case 74 | 8 | 58,084,006  | 59,075,434  | 2 | 2 | 4 | 0 |
| Case 74 | 8 | 59,079,038  | 59,305,455  | 3 | 2 | 5 | 0 |
| Case 74 | 8 | 59,305,833  | 59,784,736  | 2 | 2 | 4 | 0 |
| Case 74 | 8 | 59,785,412  | 61,149,731  | 3 | 2 | 5 | 0 |
| Case 74 | 8 | 61,150,249  | 61,788,144  | 2 | 2 | 4 | 0 |
| Case 74 | 8 | 61,789,152  | 61,962,417  | 3 | 2 | 5 | 0 |
| Case 74 | 8 | 61,963,699  | 62,625,232  | 2 | 2 | 4 | 0 |
| Case 74 | 8 | 62,633,848  | 63,014,215  | 3 | 2 | 5 | 0 |
| Case 74 | 8 | 63,014,589  | 63,444,070  | 2 | 2 | 4 | 0 |
| Case 74 | 8 | 63,445,919  | 64,458,106  | 3 | 2 | 5 | 0 |
| Case 74 | 8 | 64,460,952  | 65,720,734  | 2 | 2 | 4 | 0 |
| Case 74 | 8 | 65,730,207  | 66,008,068  | 3 | 2 | 5 | 0 |
| Case 74 | 8 | 66,008,289  | 68,765,406  | 2 | 2 | 4 | 0 |
| Case 74 | 8 | 68,773,513  | 69,852,661  | 3 | 2 | 5 | 0 |
| Case 74 | 8 | 69,855,507  | 71,069,321  | 2 | 2 | 4 | 0 |
| Case 74 | 8 | 71,069,365  | 77,187,010  | 3 | 2 | 5 | 0 |
| Case 74 | 8 | 77,187,032  | 78,054,417  | 2 | 2 | 4 | 0 |
| Case 74 | 8 | 78,057,807  | 78,946,230  | 3 | 2 | 5 | 0 |
| Case 74 | 8 | 78,951,278  | 80,535,407  | 2 | 2 | 4 | 0 |
| Case 74 | 8 | 80,536,776  | 80,630,850  | 3 | 2 | 5 | 0 |
| Case 74 | 8 | 80,633,975  | 80,976,814  | 2 | 2 | 4 | 0 |
| Case 74 | 8 | 80,980,662  | 81,137,030  | 3 | 2 | 5 | 0 |
| Case 74 | 8 | 81,142,630  | 82,251,964  | 2 | 2 | 4 | 0 |
| Case 74 | 8 | 82,256,186  | 83,734,562  | 3 | 2 | 5 | 0 |
| Case 74 | 8 | 83,738,448  | 85,143,057  | 2 | 2 | 4 | 0 |
| Case 74 | 8 | 85,143,228  | 85,880,705  | 3 | 2 | 5 | 0 |
| Case 74 | 8 | 85,906,059  | 88,472,853  | 2 | 2 | 4 | 0 |
| Case 74 | 8 | 88,472,924  | 88,574,333  | 3 | 2 | 5 | 0 |
| Case 74 | 8 | 88,578,142  | 89,017,568  | 2 | 2 | 4 | 0 |
| Case 74 | 8 | 89,018,125  | 89,131,809  | 3 | 2 | 5 | 0 |
| Case 74 | 8 | 89,136,754  | 89,327,738  | 2 | 2 | 4 | 0 |
| Case 74 | 8 | 89,334,509  | 90,220,200  | 3 | 2 | 5 | 0 |
| Case 74 | 8 | 90,228,651  | 90,578,495  | 2 | 2 | 4 | 0 |
| Case 74 | 8 | 90,578,560  | 90,638,201  | 3 | 2 | 5 | 0 |
| Case 74 | 8 | 90,638,305  | 91,002,586  | 2 | 2 | 4 | 0 |
| Case 74 | 8 | 91,007,806  | 92,008,044  | 3 | 2 | 5 | 0 |
| Case 74 | 8 | 92,016,879  | 92,531,216  | 2 | 2 | 4 | 0 |
| Case 74 | 8 | 92,546,836  | 92,688,693  | 3 | 2 | 5 | 0 |
| Case 74 | 8 | 92,698,851  | 93,593,396  | 2 | 2 | 4 | 0 |
| Case 74 | 8 | 93,605,944  | 94,627,082  | 3 | 2 | 5 | 0 |
| Case 74 | 8 | 94,633,233  | 96,455,453  | 2 | 2 | 4 | 0 |
| Case 74 | 8 | 96,456,072  | 96,758,008  | 3 | 2 | 5 | 0 |
| Case 74 | 8 | 96,758,878  | 97,122,652  | 2 | 2 | 4 | 0 |
| Case 74 | 8 | 97,125,655  | 97,234,255  | 3 | 2 | 5 | 0 |
| Case 74 | 8 | 97,244,011  | 100,032,844 | 2 | 2 | 4 | 0 |
| Case 74 | 8 | 100,080,020 | 100,160,206 | 2 | 1 | 3 | 0 |
| Case 74 | 8 | 100,168,015 | 128,172,686 | 3 | 1 | 4 | 0 |
| Case 74 | 8 | 128,178,647 | 128,356,226 | 3 | 2 | 5 | 0 |

|         |   |             |             |   |   |   |   |
|---------|---|-------------|-------------|---|---|---|---|
| Case 74 | 8 | 128,364,973 | 128,503,999 | 3 | 1 | 4 | 0 |
| Case 74 | 8 | 128,507,602 | 129,016,070 | 4 | 1 | 5 | 0 |
| Case 74 | 8 | 129,016,347 | 129,681,741 | 3 | 1 | 4 | 0 |
| Case 74 | 8 | 129,684,553 | 130,003,883 | 4 | 1 | 5 | 0 |
| Case 74 | 8 | 130,004,216 | 130,378,681 | 3 | 1 | 4 | 0 |
| Case 74 | 8 | 130,379,330 | 130,604,563 | 4 | 1 | 5 | 0 |
| Case 74 | 8 | 130,606,310 | 132,005,210 | 3 | 1 | 4 | 0 |
| Case 74 | 8 | 132,006,323 | 132,982,785 | 4 | 1 | 5 | 0 |
| Case 74 | 8 | 132,982,803 | 137,315,433 | 3 | 1 | 4 | 0 |
| Case 74 | 8 | 137,316,285 | 138,073,934 | 4 | 1 | 5 | 0 |
| Case 74 | 8 | 138,075,823 | 141,260,967 | 3 | 1 | 4 | 0 |
| Case 74 | 8 | 141,262,869 | 141,525,292 | 2 | 1 | 3 | 0 |
| Case 74 | 8 | 141,525,327 | 142,364,163 | 3 | 1 | 4 | 0 |
| Case 74 | 8 | 142,366,200 | 143,101,061 | 2 | 1 | 3 | 0 |
| Case 74 | 8 | 143,103,398 | 143,302,580 | 3 | 1 | 4 | 0 |
| Case 74 | 8 | 143,302,889 | 146,293,414 | 2 | 1 | 3 | 0 |
| Case 74 | 9 | 46,587      | 351,793     | 1 | 0 | 1 | 0 |
| Case 74 | 9 | 354,334     | 399,255     | 2 | 0 | 2 | 1 |
| Case 74 | 9 | 404,995     | 448,429     | 1 | 0 | 1 | 0 |
| Case 74 | 9 | 449,373     | 470,086     | 2 | 0 | 2 | 1 |
| Case 74 | 9 | 473,379     | 679,901     | 1 | 0 | 1 | 0 |
| Case 74 | 9 | 680,323     | 712,856     | 2 | 0 | 2 | 1 |
| Case 74 | 9 | 713,108     | 724,217     | 1 | 0 | 1 | 0 |
| Case 74 | 9 | 724,287     | 801,602     | 2 | 0 | 2 | 1 |
| Case 74 | 9 | 802,801     | 857,511     | 1 | 0 | 1 | 0 |
| Case 74 | 9 | 863,635     | 905,068     | 2 | 0 | 2 | 1 |
| Case 74 | 9 | 907,561     | 988,376     | 1 | 0 | 1 | 0 |
| Case 74 | 9 | 990,076     | 1,000,520   | 2 | 0 | 2 | 1 |
| Case 74 | 9 | 1,001,309   | 1,024,471   | 1 | 0 | 1 | 0 |
| Case 74 | 9 | 1,032,153   | 1,056,975   | 2 | 0 | 2 | 1 |
| Case 74 | 9 | 1,057,116   | 1,170,227   | 1 | 0 | 1 | 0 |
| Case 74 | 9 | 1,174,357   | 1,209,190   | 2 | 0 | 2 | 1 |
| Case 74 | 9 | 1,209,265   | 1,303,774   | 1 | 0 | 1 | 0 |
| Case 74 | 9 | 1,304,815   | 1,324,127   | 2 | 0 | 2 | 1 |
| Case 74 | 9 | 1,324,647   | 1,332,257   | 1 | 0 | 1 | 0 |
| Case 74 | 9 | 1,334,190   | 1,356,482   | 2 | 0 | 2 | 1 |
| Case 74 | 9 | 1,358,025   | 1,393,733   | 1 | 0 | 1 | 0 |
| Case 74 | 9 | 1,399,761   | 1,460,365   | 2 | 0 | 2 | 1 |
| Case 74 | 9 | 1,460,427   | 1,506,101   | 1 | 0 | 1 | 0 |
| Case 74 | 9 | 1,507,712   | 1,553,378   | 2 | 0 | 2 | 1 |
| Case 74 | 9 | 1,553,462   | 1,674,726   | 1 | 0 | 1 | 0 |
| Case 74 | 9 | 1,675,540   | 1,721,778   | 2 | 0 | 2 | 1 |
| Case 74 | 9 | 1,722,019   | 1,784,090   | 1 | 0 | 1 | 0 |
| Case 74 | 9 | 1,784,948   | 1,849,664   | 2 | 0 | 2 | 1 |
| Case 74 | 9 | 1,859,272   | 1,900,689   | 1 | 0 | 1 | 0 |
| Case 74 | 9 | 1,908,927   | 1,968,085   | 2 | 0 | 2 | 1 |
| Case 74 | 9 | 1,969,329   | 2,029,454   | 1 | 0 | 1 | 0 |
| Case 74 | 9 | 2,030,300   | 2,042,083   | 2 | 0 | 2 | 1 |
| Case 74 | 9 | 2,048,361   | 2,115,271   | 1 | 0 | 1 | 0 |
| Case 74 | 9 | 2,116,037   | 2,191,407   | 2 | 0 | 2 | 1 |
| Case 74 | 9 | 2,193,975   | 2,254,498   | 1 | 0 | 1 | 0 |
| Case 74 | 9 | 2,255,397   | 2,301,692   | 2 | 0 | 2 | 1 |
| Case 74 | 9 | 2,302,693   | 2,380,595   | 1 | 0 | 1 | 0 |
| Case 74 | 9 | 2,381,672   | 2,414,600   | 2 | 0 | 2 | 1 |
| Case 74 | 9 | 2,419,538   | 2,535,695   | 1 | 0 | 1 | 0 |
| Case 74 | 9 | 2,535,913   | 2,539,495   | 2 | 0 | 2 | 1 |
| Case 74 | 9 | 2,541,567   | 2,593,528   | 1 | 0 | 1 | 0 |
| Case 74 | 9 | 2,596,569   | 2,621,177   | 2 | 0 | 2 | 1 |
| Case 74 | 9 | 2,622,278   | 2,636,492   | 1 | 0 | 1 | 0 |
| Case 74 | 9 | 2,637,551   | 2,653,719   | 2 | 0 | 2 | 1 |
| Case 74 | 9 | 2,653,914   | 2,655,520   | 1 | 0 | 1 | 0 |

|         |   |            |            |   |   |   |   |
|---------|---|------------|------------|---|---|---|---|
| Case 74 | 9 | 2,658,587  | 2,718,180  | 2 | 0 | 2 | 1 |
| Case 74 | 9 | 2,718,349  | 2,834,101  | 1 | 0 | 1 | 0 |
| Case 74 | 9 | 2,834,107  | 2,890,451  | 2 | 0 | 2 | 1 |
| Case 74 | 9 | 2,892,642  | 2,978,377  | 1 | 0 | 1 | 0 |
| Case 74 | 9 | 2,982,931  | 3,015,465  | 2 | 0 | 2 | 1 |
| Case 74 | 9 | 3,022,592  | 3,755,135  | 1 | 0 | 1 | 0 |
| Case 74 | 9 | 3,755,938  | 3,793,026  | 2 | 0 | 2 | 1 |
| Case 74 | 9 | 3,801,316  | 3,828,319  | 1 | 0 | 1 | 0 |
| Case 74 | 9 | 3,828,355  | 3,898,987  | 2 | 0 | 2 | 1 |
| Case 74 | 9 | 3,900,782  | 3,935,560  | 1 | 0 | 1 | 0 |
| Case 74 | 9 | 3,936,301  | 4,064,137  | 2 | 0 | 2 | 1 |
| Case 74 | 9 | 4,065,171  | 4,089,046  | 1 | 0 | 1 | 0 |
| Case 74 | 9 | 4,090,601  | 4,193,531  | 2 | 0 | 2 | 1 |
| Case 74 | 9 | 4,194,762  | 4,206,671  | 1 | 0 | 1 | 0 |
| Case 74 | 9 | 4,206,769  | 4,218,178  | 2 | 0 | 2 | 1 |
| Case 74 | 9 | 4,218,631  | 4,307,572  | 1 | 0 | 1 | 0 |
| Case 74 | 9 | 4,307,589  | 4,311,892  | 2 | 0 | 2 | 1 |
| Case 74 | 9 | 4,314,752  | 4,327,048  | 1 | 0 | 1 | 0 |
| Case 74 | 9 | 4,327,105  | 4,335,668  | 2 | 0 | 2 | 1 |
| Case 74 | 9 | 4,338,987  | 4,556,448  | 1 | 0 | 1 | 0 |
| Case 74 | 9 | 4,559,775  | 4,622,472  | 2 | 0 | 2 | 1 |
| Case 74 | 9 | 4,625,359  | 4,654,195  | 1 | 0 | 1 | 0 |
| Case 74 | 9 | 4,655,980  | 4,691,570  | 2 | 0 | 2 | 1 |
| Case 74 | 9 | 4,691,765  | 4,712,407  | 1 | 0 | 1 | 0 |
| Case 74 | 9 | 4,713,058  | 4,722,574  | 2 | 0 | 2 | 1 |
| Case 74 | 9 | 4,725,823  | 4,790,165  | 1 | 0 | 1 | 0 |
| Case 74 | 9 | 4,792,339  | 4,840,063  | 2 | 0 | 2 | 1 |
| Case 74 | 9 | 4,841,290  | 4,861,479  | 1 | 0 | 1 | 0 |
| Case 74 | 9 | 4,863,952  | 4,888,441  | 2 | 0 | 2 | 1 |
| Case 74 | 9 | 4,895,391  | 5,464,065  | 1 | 0 | 1 | 0 |
| Case 74 | 9 | 5,465,130  | 5,581,140  | 2 | 0 | 2 | 1 |
| Case 74 | 9 | 5,593,419  | 5,872,949  | 1 | 0 | 1 | 0 |
| Case 74 | 9 | 5,875,294  | 5,920,886  | 2 | 0 | 2 | 1 |
| Case 74 | 9 | 5,920,894  | 6,064,103  | 1 | 0 | 1 | 0 |
| Case 74 | 9 | 6,067,122  | 6,111,473  | 2 | 0 | 2 | 1 |
| Case 74 | 9 | 6,113,103  | 6,176,770  | 1 | 0 | 1 | 0 |
| Case 74 | 9 | 6,184,165  | 6,331,610  | 2 | 0 | 2 | 1 |
| Case 74 | 9 | 6,342,328  | 6,508,149  | 1 | 0 | 1 | 0 |
| Case 74 | 9 | 6,515,433  | 6,556,948  | 2 | 0 | 2 | 1 |
| Case 74 | 9 | 6,567,841  | 6,604,775  | 1 | 0 | 1 | 0 |
| Case 74 | 9 | 6,605,131  | 6,682,871  | 2 | 0 | 2 | 1 |
| Case 74 | 9 | 6,684,955  | 7,106,795  | 1 | 0 | 1 | 0 |
| Case 74 | 9 | 7,109,651  | 7,150,997  | 2 | 0 | 2 | 1 |
| Case 74 | 9 | 7,153,009  | 7,173,500  | 1 | 0 | 1 | 0 |
| Case 74 | 9 | 7,173,752  | 7,272,552  | 2 | 0 | 2 | 1 |
| Case 74 | 9 | 7,273,950  | 7,360,902  | 1 | 0 | 1 | 0 |
| Case 74 | 9 | 7,361,202  | 7,405,911  | 2 | 0 | 2 | 1 |
| Case 74 | 9 | 7,408,763  | 7,466,024  | 1 | 0 | 1 | 0 |
| Case 74 | 9 | 7,467,366  | 7,504,790  | 2 | 0 | 2 | 1 |
| Case 74 | 9 | 7,505,644  | 7,526,908  | 1 | 0 | 1 | 0 |
| Case 74 | 9 | 7,530,883  | 7,607,425  | 2 | 0 | 2 | 1 |
| Case 74 | 9 | 7,612,143  | 7,707,372  | 1 | 0 | 1 | 0 |
| Case 74 | 9 | 7,711,440  | 7,725,912  | 2 | 0 | 2 | 1 |
| Case 74 | 9 | 7,726,450  | 8,485,885  | 1 | 0 | 1 | 0 |
| Case 74 | 9 | 8,485,894  | 8,486,335  | 2 | 0 | 2 | 1 |
| Case 74 | 9 | 8,489,006  | 8,515,987  | 1 | 0 | 1 | 0 |
| Case 74 | 9 | 8,517,383  | 8,522,326  | 2 | 0 | 2 | 1 |
| Case 74 | 9 | 8,524,448  | 8,996,113  | 1 | 0 | 1 | 0 |
| Case 74 | 9 | 8,996,408  | 9,001,239  | 2 | 0 | 2 | 1 |
| Case 74 | 9 | 9,001,538  | 12,815,091 | 1 | 0 | 1 | 0 |
| Case 74 | 9 | 12,816,521 | 12,821,754 | 2 | 0 | 2 | 1 |

|         |   |             |             |   |   |   |   |
|---------|---|-------------|-------------|---|---|---|---|
| Case 74 | 9 | 12,822,458  | 13,741,905  | 1 | 0 | 1 | 0 |
| Case 74 | 9 | 13,743,830  | 13,790,202  | 2 | 0 | 2 | 1 |
| Case 74 | 9 | 13,791,531  | 14,312,724  | 1 | 0 | 1 | 0 |
| Case 74 | 9 | 14,313,712  | 14,378,712  | 2 | 0 | 2 | 1 |
| Case 74 | 9 | 14,378,776  | 14,769,803  | 1 | 0 | 1 | 0 |
| Case 74 | 9 | 14,770,658  | 14,776,178  | 2 | 0 | 2 | 1 |
| Case 74 | 9 | 14,782,497  | 14,804,141  | 1 | 0 | 1 | 0 |
| Case 74 | 9 | 14,804,733  | 14,878,376  | 2 | 0 | 2 | 1 |
| Case 74 | 9 | 14,880,667  | 15,259,432  | 1 | 0 | 1 | 0 |
| Case 74 | 9 | 15,264,197  | 15,301,428  | 2 | 0 | 2 | 1 |
| Case 74 | 9 | 15,304,782  | 15,385,568  | 1 | 0 | 1 | 0 |
| Case 74 | 9 | 15,386,433  | 15,444,648  | 2 | 0 | 2 | 1 |
| Case 74 | 9 | 15,447,191  | 16,028,693  | 1 | 0 | 1 | 0 |
| Case 74 | 9 | 16,033,109  | 16,292,669  | 2 | 0 | 2 | 1 |
| Case 74 | 9 | 16,296,851  | 16,324,261  | 1 | 0 | 1 | 0 |
| Case 74 | 9 | 16,324,374  | 16,437,276  | 2 | 0 | 2 | 1 |
| Case 74 | 9 | 16,446,091  | 16,789,024  | 1 | 0 | 1 | 0 |
| Case 74 | 9 | 16,789,081  | 16,795,286  | 2 | 0 | 2 | 1 |
| Case 74 | 9 | 16,795,790  | 17,117,875  | 1 | 0 | 1 | 0 |
| Case 74 | 9 | 17,118,007  | 17,147,361  | 2 | 0 | 2 | 1 |
| Case 74 | 9 | 17,147,702  | 17,462,978  | 1 | 0 | 1 | 0 |
| Case 74 | 9 | 17,462,985  | 17,464,622  | 0 | 0 | 0 | 0 |
| Case 74 | 9 | 17,466,468  | 17,622,897  | 1 | 0 | 1 | 0 |
| Case 74 | 9 | 17,624,902  | 17,633,232  | 2 | 0 | 2 | 1 |
| Case 74 | 9 | 17,634,332  | 17,793,435  | 1 | 0 | 1 | 0 |
| Case 74 | 9 | 17,793,463  | 17,833,057  | 2 | 0 | 2 | 1 |
| Case 74 | 9 | 17,836,749  | 17,976,625  | 1 | 0 | 1 | 0 |
| Case 74 | 9 | 17,987,408  | 18,013,733  | 2 | 0 | 2 | 1 |
| Case 74 | 9 | 18,016,234  | 18,349,993  | 1 | 0 | 1 | 0 |
| Case 74 | 9 | 18,358,128  | 18,374,849  | 2 | 0 | 2 | 1 |
| Case 74 | 9 | 18,375,279  | 18,393,875  | 1 | 0 | 1 | 0 |
| Case 74 | 9 | 18,395,376  | 18,438,196  | 2 | 0 | 2 | 1 |
| Case 74 | 9 | 18,442,710  | 18,602,403  | 1 | 0 | 1 | 0 |
| Case 74 | 9 | 18,606,825  | 19,746,160  | 2 | 0 | 2 | 1 |
| Case 74 | 9 | 19,751,159  | 19,801,918  | 3 | 0 | 3 | 1 |
| Case 74 | 9 | 19,803,724  | 20,046,681  | 2 | 0 | 2 | 1 |
| Case 74 | 9 | 20,048,229  | 20,354,575  | 3 | 0 | 3 | 1 |
| Case 74 | 9 | 20,354,796  | 27,176,886  | 2 | 0 | 2 | 1 |
| Case 74 | 9 | 27,179,075  | 27,213,772  | 3 | 0 | 3 | 1 |
| Case 74 | 9 | 27,214,719  | 27,912,332  | 2 | 0 | 2 | 1 |
| Case 74 | 9 | 27,914,251  | 27,974,577  | 3 | 0 | 3 | 1 |
| Case 74 | 9 | 27,974,789  | 31,136,986  | 2 | 0 | 2 | 1 |
| Case 74 | 9 | 31,146,393  | 33,886,905  | 4 | 0 | 4 | 1 |
| Case 74 | 9 | 33,888,000  | 34,506,756  | 3 | 0 | 3 | 1 |
| Case 74 | 9 | 34,509,746  | 34,647,200  | 4 | 0 | 4 | 1 |
| Case 74 | 9 | 34,647,214  | 34,768,441  | 3 | 0 | 3 | 1 |
| Case 74 | 9 | 34,768,693  | 35,608,501  | 4 | 0 | 4 | 1 |
| Case 74 | 9 | 35,608,975  | 35,810,978  | 3 | 0 | 3 | 1 |
| Case 74 | 9 | 35,810,991  | 36,815,627  | 4 | 0 | 4 | 1 |
| Case 74 | 9 | 36,816,714  | 46,944,322  | 3 | 0 | 3 | 1 |
| Case 74 | 9 | 65,629,772  | 78,430,918  | 3 | 0 | 3 | 1 |
| Case 74 | 9 | 78,438,434  | 78,548,556  | 4 | 0 | 4 | 1 |
| Case 74 | 9 | 78,551,222  | 112,630,762 | 3 | 0 | 3 | 1 |
| Case 74 | 9 | 112,632,327 | 116,789,690 | 4 | 0 | 4 | 1 |
| Case 74 | 9 | 116,790,352 | 116,931,562 | 3 | 0 | 3 | 1 |
| Case 74 | 9 | 116,931,664 | 117,086,356 | 4 | 0 | 4 | 1 |
| Case 74 | 9 | 117,086,367 | 117,200,140 | 3 | 0 | 3 | 1 |
| Case 74 | 9 | 117,205,332 | 124,630,333 | 4 | 0 | 4 | 1 |
| Case 74 | 9 | 124,640,841 | 124,980,026 | 3 | 0 | 3 | 1 |
| Case 74 | 9 | 124,984,125 | 125,273,361 | 4 | 0 | 4 | 1 |
| Case 74 | 9 | 125,273,419 | 125,289,523 | 3 | 0 | 3 | 1 |



|         |    |             |             |   |   |   |   |
|---------|----|-------------|-------------|---|---|---|---|
| Case 74 | 9  | 125,289,554 | 130,053,105 | 4 | 0 | 4 | 1 |
| Case 74 | 9  | 130,055,785 | 132,417,991 | 3 | 0 | 3 | 1 |
| Case 74 | 9  | 132,425,233 | 132,515,081 | 4 | 0 | 4 | 1 |
| Case 74 | 9  | 132,515,247 | 132,940,007 | 3 | 0 | 3 | 1 |
| Case 74 | 9  | 132,943,043 | 133,328,969 | 4 | 0 | 4 | 1 |
| Case 74 | 9  | 133,331,226 | 134,402,338 | 3 | 0 | 3 | 1 |
| Case 74 | 9  | 134,404,557 | 135,374,091 | 4 | 0 | 4 | 1 |
| Case 74 | 9  | 135,374,154 | 135,995,166 | 3 | 0 | 3 | 1 |
| Case 74 | 9  | 136,000,445 | 136,131,002 | 4 | 0 | 4 | 1 |
| Case 74 | 9  | 136,131,069 | 137,859,032 | 3 | 0 | 3 | 1 |
| Case 74 | 9  | 137,864,163 | 138,006,947 | 4 | 0 | 4 | 1 |
| Case 74 | 9  | 138,008,243 | 140,146,315 | 3 | 0 | 3 | 1 |
| Case 74 | 9  | 140,146,525 | 141,066,491 | 4 | 0 | 4 | 1 |
| Case 74 | 10 | 98,087      | 462,628     | 2 | 1 | 3 | 0 |
| Case 74 | 10 | 462,885     | 1,170,220   | 2 | 2 | 4 | 0 |
| Case 74 | 10 | 1,171,734   | 1,263,039   | 2 | 1 | 3 | 0 |
| Case 74 | 10 | 1,274,538   | 2,981,486   | 2 | 2 | 4 | 0 |
| Case 74 | 10 | 2,982,125   | 3,076,294   | 2 | 1 | 3 | 0 |
| Case 74 | 10 | 3,077,299   | 5,782,310   | 2 | 2 | 4 | 0 |
| Case 74 | 10 | 5,784,151   | 5,791,298   | 2 | 1 | 3 | 0 |
| Case 74 | 10 | 5,791,299   | 7,602,831   | 2 | 2 | 4 | 0 |
| Case 74 | 10 | 7,603,104   | 7,622,047   | 2 | 1 | 3 | 0 |
| Case 74 | 10 | 7,622,904   | 37,383,596  | 2 | 2 | 4 | 0 |
| Case 74 | 10 | 37,384,046  | 37,506,732  | 3 | 0 | 3 | 1 |
| Case 74 | 10 | 37,508,038  | 38,207,759  | 4 | 0 | 4 | 1 |
| Case 74 | 10 | 38,218,259  | 39,097,912  | 3 | 0 | 3 | 1 |
| Case 74 | 10 | 42,436,301  | 42,778,779  | 3 | 0 | 3 | 1 |
| Case 74 | 10 | 42,794,125  | 43,060,597  | 2 | 0 | 2 | 1 |
| Case 74 | 10 | 43,066,505  | 43,087,295  | 3 | 0 | 3 | 1 |
| Case 74 | 10 | 43,088,356  | 45,368,956  | 2 | 0 | 2 | 1 |
| Case 74 | 10 | 45,371,418  | 45,444,490  | 3 | 0 | 3 | 1 |
| Case 74 | 10 | 45,446,048  | 47,000,252  | 2 | 0 | 2 | 1 |
| Case 74 | 10 | 47,049,547  | 47,087,522  | 3 | 0 | 3 | 1 |
| Case 74 | 10 | 47,087,550  | 62,094,202  | 2 | 0 | 2 | 1 |
| Case 74 | 10 | 62,094,752  | 62,200,882  | 3 | 0 | 3 | 1 |
| Case 74 | 10 | 62,212,334  | 69,926,334  | 2 | 0 | 2 | 1 |
| Case 74 | 10 | 69,926,350  | 69,961,675  | 3 | 0 | 3 | 1 |
| Case 74 | 10 | 69,962,850  | 75,565,935  | 2 | 0 | 2 | 1 |
| Case 74 | 10 | 75,566,072  | 75,705,977  | 3 | 0 | 3 | 1 |
| Case 74 | 10 | 75,708,906  | 78,072,389  | 2 | 0 | 2 | 1 |
| Case 74 | 10 | 78,078,159  | 91,497,195  | 3 | 0 | 3 | 1 |
| Case 74 | 10 | 91,497,209  | 91,497,623  | 2 | 0 | 2 | 1 |
| Case 74 | 10 | 91,497,631  | 135,477,883 | 3 | 0 | 3 | 1 |
| Case 74 | 11 | 193,146     | 3,400,334   | 3 | 0 | 3 | 1 |
| Case 74 | 11 | 3,401,191   | 14,571,637  | 4 | 0 | 4 | 1 |
| Case 74 | 11 | 14,573,552  | 14,769,392  | 3 | 0 | 3 | 1 |
| Case 74 | 11 | 14,769,536  | 28,421,841  | 4 | 0 | 4 | 1 |
| Case 74 | 11 | 28,446,722  | 51,591,253  | 3 | 0 | 3 | 1 |
| Case 74 | 11 | 54,794,237  | 77,584,647  | 3 | 0 | 3 | 1 |
| Case 74 | 11 | 77,587,973  | 77,884,338  | 2 | 0 | 2 | 1 |
| Case 74 | 11 | 77,884,782  | 80,182,109  | 3 | 0 | 3 | 1 |
| Case 74 | 11 | 80,187,596  | 80,256,116  | 4 | 0 | 4 | 1 |
| Case 74 | 11 | 80,257,728  | 80,584,598  | 3 | 0 | 3 | 1 |
| Case 74 | 11 | 80,595,949  | 81,430,152  | 2 | 0 | 2 | 1 |
| Case 74 | 11 | 81,441,351  | 82,086,661  | 3 | 0 | 3 | 1 |
| Case 74 | 11 | 82,089,086  | 82,423,811  | 4 | 0 | 4 | 1 |
| Case 74 | 11 | 82,430,245  | 124,502,260 | 3 | 0 | 3 | 1 |
| Case 74 | 11 | 124,506,947 | 124,602,247 | 1 | 0 | 1 | 0 |
| Case 74 | 11 | 124,605,290 | 124,605,290 | 2 | 0 | 2 | 1 |
| Case 74 | 11 | 124,606,285 | 134,934,063 | 3 | 0 | 3 | 1 |
| Case 74 | 12 | 191,619     | 12,006,412  | 2 | 1 | 3 | 0 |

|         |    |             |             |   |   |   |   |
|---------|----|-------------|-------------|---|---|---|---|
| Case 74 | 12 | 12,007,920  | 12,116,926  | 2 | 0 | 2 | 1 |
| Case 74 | 12 | 12,119,414  | 12,165,726  | 2 | 1 | 3 | 0 |
| Case 74 | 12 | 12,166,818  | 12,446,933  | 2 | 0 | 2 | 1 |
| Case 74 | 12 | 12,449,024  | 34,853,011  | 2 | 1 | 3 | 0 |
| Case 74 | 12 | 37,876,400  | 52,692,473  | 2 | 1 | 3 | 0 |
| Case 74 | 12 | 52,692,815  | 52,726,945  | 2 | 2 | 4 | 0 |
| Case 74 | 12 | 52,735,450  | 76,212,584  | 2 | 1 | 3 | 0 |
| Case 74 | 12 | 76,216,242  | 76,518,531  | 3 | 1 | 4 | 0 |
| Case 74 | 12 | 76,518,674  | 89,415,356  | 2 | 1 | 3 | 0 |
| Case 74 | 12 | 89,425,822  | 89,555,278  | 2 | 2 | 4 | 0 |
| Case 74 | 12 | 89,576,400  | 98,557,685  | 2 | 1 | 3 | 0 |
| Case 74 | 12 | 98,558,234  | 99,043,435  | 3 | 1 | 4 | 0 |
| Case 74 | 12 | 99,050,366  | 105,650,599 | 2 | 1 | 3 | 0 |
| Case 74 | 12 | 105,657,527 | 105,788,045 | 3 | 1 | 4 | 0 |
| Case 74 | 12 | 105,790,479 | 125,141,528 | 2 | 1 | 3 | 0 |
| Case 74 | 12 | 125,141,589 | 125,240,557 | 2 | 2 | 4 | 0 |
| Case 74 | 12 | 125,241,988 | 133,810,935 | 2 | 1 | 3 | 0 |
| Case 74 | 13 | 19,058,717  | 22,141,005  | 5 | 0 | 5 | 1 |
| Case 74 | 13 | 22,141,038  | 82,300,870  | 4 | 0 | 4 | 1 |
| Case 74 | 13 | 82,301,854  | 82,518,710  | 3 | 0 | 3 | 1 |
| Case 74 | 13 | 82,522,722  | 110,830,200 | 4 | 0 | 4 | 1 |
| Case 74 | 13 | 110,830,258 | 110,862,526 | 3 | 0 | 3 | 1 |
| Case 74 | 13 | 110,864,256 | 113,206,738 | 4 | 0 | 4 | 1 |
| Case 74 | 13 | 113,208,394 | 115,103,529 | 3 | 0 | 3 | 1 |
| Case 74 | 14 | 19,280,733  | 23,015,874  | 2 | 1 | 3 | 0 |
| Case 74 | 14 | 23,018,808  | 23,022,546  | 2 | 2 | 4 | 0 |
| Case 74 | 14 | 23,024,150  | 25,843,774  | 2 | 1 | 3 | 0 |
| Case 74 | 14 | 25,857,804  | 29,824,131  | 1 | 1 | 2 | 0 |
| Case 74 | 14 | 29,836,773  | 39,718,714  | 2 | 1 | 3 | 0 |
| Case 74 | 14 | 39,721,010  | 40,051,197  | 1 | 1 | 2 | 0 |
| Case 74 | 14 | 40,075,078  | 43,413,796  | 2 | 1 | 3 | 0 |
| Case 74 | 14 | 43,429,734  | 43,474,406  | 1 | 0 | 1 | 0 |
| Case 74 | 14 | 43,480,483  | 43,906,424  | 2 | 1 | 3 | 0 |
| Case 74 | 14 | 43,939,771  | 44,010,789  | 1 | 0 | 1 | 0 |
| Case 74 | 14 | 44,024,330  | 44,292,051  | 2 | 0 | 2 | 1 |
| Case 74 | 14 | 44,293,020  | 65,633,561  | 2 | 1 | 3 | 0 |
| Case 74 | 14 | 65,634,797  | 65,876,428  | 3 | 1 | 4 | 0 |
| Case 74 | 14 | 65,878,256  | 67,040,643  | 2 | 1 | 3 | 0 |
| Case 74 | 14 | 67,086,676  | 67,527,235  | 1 | 1 | 2 | 0 |
| Case 74 | 14 | 67,554,120  | 68,252,852  | 2 | 1 | 3 | 0 |
| Case 74 | 14 | 68,256,184  | 92,345,665  | 1 | 1 | 2 | 0 |
| Case 74 | 14 | 92,347,680  | 92,403,660  | 2 | 1 | 3 | 0 |
| Case 74 | 14 | 92,407,693  | 95,181,481  | 1 | 1 | 2 | 0 |
| Case 74 | 14 | 95,185,017  | 95,339,855  | 2 | 1 | 3 | 0 |
| Case 74 | 14 | 95,339,930  | 95,447,773  | 3 | 1 | 4 | 0 |
| Case 74 | 14 | 95,462,477  | 107,287,663 | 2 | 1 | 3 | 0 |
| Case 74 | 15 | 20,034,919  | 24,921,649  | 2 | 0 | 2 | 1 |
| Case 74 | 15 | 24,921,677  | 24,923,107  | 3 | 0 | 3 | 1 |
| Case 74 | 15 | 24,923,283  | 25,925,339  | 2 | 0 | 2 | 1 |
| Case 74 | 15 | 25,925,449  | 25,957,736  | 3 | 0 | 3 | 1 |
| Case 74 | 15 | 25,959,032  | 26,010,873  | 2 | 0 | 2 | 1 |
| Case 74 | 15 | 26,012,544  | 26,414,375  | 3 | 0 | 3 | 1 |
| Case 74 | 15 | 26,420,412  | 27,930,216  | 2 | 0 | 2 | 1 |
| Case 74 | 15 | 27,932,902  | 28,022,360  | 3 | 0 | 3 | 1 |
| Case 74 | 15 | 28,023,061  | 29,962,039  | 2 | 0 | 2 | 1 |
| Case 74 | 15 | 29,964,006  | 30,025,358  | 3 | 0 | 3 | 1 |
| Case 74 | 15 | 30,025,403  | 31,325,069  | 2 | 0 | 2 | 1 |
| Case 74 | 15 | 31,326,789  | 31,394,322  | 3 | 0 | 3 | 1 |
| Case 74 | 15 | 31,394,537  | 31,478,183  | 2 | 0 | 2 | 1 |
| Case 74 | 15 | 31,479,286  | 31,780,695  | 3 | 0 | 3 | 1 |
| Case 74 | 15 | 31,781,988  | 33,148,207  | 2 | 0 | 2 | 1 |

|         |    |            |             |   |   |   |   |
|---------|----|------------|-------------|---|---|---|---|
| Case 74 | 15 | 33,149,087 | 33,540,441  | 3 | 0 | 3 | 1 |
| Case 74 | 15 | 33,542,631 | 33,759,204  | 2 | 0 | 2 | 1 |
| Case 74 | 15 | 33,760,116 | 33,822,969  | 3 | 0 | 3 | 1 |
| Case 74 | 15 | 33,824,335 | 34,014,913  | 2 | 0 | 2 | 1 |
| Case 74 | 15 | 34,014,942 | 34,356,485  | 3 | 0 | 3 | 1 |
| Case 74 | 15 | 34,358,325 | 34,800,595  | 2 | 0 | 2 | 1 |
| Case 74 | 15 | 34,871,296 | 34,970,673  | 3 | 0 | 3 | 1 |
| Case 74 | 15 | 34,977,813 | 37,070,558  | 2 | 0 | 2 | 1 |
| Case 74 | 15 | 37,070,821 | 37,184,496  | 3 | 0 | 3 | 1 |
| Case 74 | 15 | 37,184,627 | 38,188,807  | 2 | 0 | 2 | 1 |
| Case 74 | 15 | 38,190,888 | 38,524,264  | 3 | 0 | 3 | 1 |
| Case 74 | 15 | 38,528,399 | 38,847,763  | 2 | 0 | 2 | 1 |
| Case 74 | 15 | 38,852,099 | 39,113,061  | 3 | 0 | 3 | 1 |
| Case 74 | 15 | 39,116,076 | 39,620,617  | 2 | 0 | 2 | 1 |
| Case 74 | 15 | 39,622,432 | 39,682,798  | 3 | 0 | 3 | 1 |
| Case 74 | 15 | 39,687,127 | 40,265,116  | 2 | 0 | 2 | 1 |
| Case 74 | 15 | 40,265,503 | 40,300,254  | 3 | 0 | 3 | 1 |
| Case 74 | 15 | 40,300,691 | 42,652,076  | 2 | 0 | 2 | 1 |
| Case 74 | 15 | 42,652,235 | 42,720,322  | 3 | 0 | 3 | 1 |
| Case 74 | 15 | 42,723,407 | 43,489,658  | 2 | 0 | 2 | 1 |
| Case 74 | 15 | 43,494,043 | 43,571,407  | 3 | 0 | 3 | 1 |
| Case 74 | 15 | 43,571,937 | 45,408,056  | 2 | 0 | 2 | 1 |
| Case 74 | 15 | 45,408,408 | 45,641,225  | 3 | 0 | 3 | 1 |
| Case 74 | 15 | 45,652,889 | 47,658,214  | 2 | 0 | 2 | 1 |
| Case 74 | 15 | 47,660,902 | 48,392,165  | 3 | 0 | 3 | 1 |
| Case 74 | 15 | 48,395,646 | 48,692,612  | 2 | 0 | 2 | 1 |
| Case 74 | 15 | 48,694,211 | 49,012,013  | 3 | 0 | 3 | 1 |
| Case 74 | 15 | 49,013,011 | 51,294,832  | 2 | 0 | 2 | 1 |
| Case 74 | 15 | 51,295,934 | 51,659,830  | 3 | 0 | 3 | 1 |
| Case 74 | 15 | 51,663,386 | 52,050,699  | 2 | 0 | 2 | 1 |
| Case 74 | 15 | 52,053,229 | 52,602,736  | 3 | 0 | 3 | 1 |
| Case 74 | 15 | 52,605,656 | 53,046,210  | 2 | 0 | 2 | 1 |
| Case 74 | 15 | 53,048,463 | 53,187,272  | 3 | 0 | 3 | 1 |
| Case 74 | 15 | 53,188,169 | 53,314,390  | 2 | 0 | 2 | 1 |
| Case 74 | 15 | 53,316,487 | 53,869,866  | 3 | 0 | 3 | 1 |
| Case 74 | 15 | 53,874,539 | 57,574,723  | 2 | 0 | 2 | 1 |
| Case 74 | 15 | 57,575,916 | 58,121,664  | 3 | 0 | 3 | 1 |
| Case 74 | 15 | 58,122,823 | 58,440,194  | 2 | 0 | 2 | 1 |
| Case 74 | 15 | 58,442,332 | 58,852,463  | 3 | 0 | 3 | 1 |
| Case 74 | 15 | 58,853,079 | 59,479,689  | 2 | 0 | 2 | 1 |
| Case 74 | 15 | 59,480,141 | 59,712,427  | 3 | 0 | 3 | 1 |
| Case 74 | 15 | 59,717,087 | 59,996,367  | 2 | 0 | 2 | 1 |
| Case 74 | 15 | 59,997,696 | 60,673,690  | 3 | 0 | 3 | 1 |
| Case 74 | 15 | 60,674,672 | 60,907,492  | 2 | 0 | 2 | 1 |
| Case 74 | 15 | 60,908,307 | 62,140,034  | 3 | 0 | 3 | 1 |
| Case 74 | 15 | 62,145,214 | 62,401,926  | 2 | 0 | 2 | 1 |
| Case 74 | 15 | 62,402,220 | 62,442,269  | 3 | 0 | 3 | 1 |
| Case 74 | 15 | 62,445,526 | 62,729,354  | 2 | 0 | 2 | 1 |
| Case 74 | 15 | 62,732,330 | 62,908,065  | 3 | 0 | 3 | 1 |
| Case 74 | 15 | 62,908,928 | 63,663,833  | 2 | 0 | 2 | 1 |
| Case 74 | 15 | 63,665,847 | 76,350,112  | 3 | 0 | 3 | 1 |
| Case 74 | 15 | 76,359,055 | 76,470,755  | 4 | 0 | 4 | 1 |
| Case 74 | 15 | 76,473,376 | 97,369,257  | 3 | 0 | 3 | 1 |
| Case 74 | 15 | 97,371,428 | 99,669,628  | 4 | 0 | 4 | 1 |
| Case 74 | 15 | 99,669,655 | 99,673,019  | 3 | 0 | 3 | 1 |
| Case 74 | 15 | 99,673,100 | 102,461,162 | 4 | 0 | 4 | 1 |
| Case 74 | 16 | 88,165     | 11,822,066  | 1 | 1 | 2 | 0 |
| Case 74 | 16 | 11,824,509 | 11,850,150  | 2 | 1 | 3 | 0 |
| Case 74 | 16 | 11,855,330 | 20,099,261  | 1 | 1 | 2 | 0 |
| Case 74 | 16 | 20,106,198 | 35,069,526  | 2 | 1 | 3 | 0 |
| Case 74 | 16 | 35,097,351 | 35,285,582  | 1 | 1 | 2 | 0 |

|         |    |            |            |   |   |   |   |
|---------|----|------------|------------|---|---|---|---|
| Case 74 | 16 | 46,450,037 | 70,841,632 | 1 | 1 | 2 | 0 |
| Case 74 | 16 | 70,841,656 | 70,934,974 | 2 | 1 | 3 | 0 |
| Case 74 | 16 | 70,937,561 | 71,196,543 | 3 | 0 | 3 | 1 |
| Case 74 | 16 | 71,206,836 | 71,318,577 | 2 | 0 | 2 | 1 |
| Case 74 | 16 | 71,318,833 | 72,827,202 | 1 | 1 | 2 | 0 |
| Case 74 | 16 | 72,827,541 | 72,832,025 | 2 | 1 | 3 | 0 |
| Case 74 | 16 | 72,832,031 | 73,710,475 | 1 | 1 | 2 | 0 |
| Case 74 | 16 | 73,713,683 | 73,828,357 | 2 | 1 | 3 | 0 |
| Case 74 | 16 | 73,829,111 | 78,524,330 | 1 | 1 | 2 | 0 |
| Case 74 | 16 | 78,527,004 | 78,527,664 | 2 | 1 | 3 | 0 |
| Case 74 | 16 | 78,533,357 | 78,550,848 | 2 | 0 | 2 | 1 |
| Case 74 | 16 | 78,551,317 | 78,559,880 | 1 | 0 | 1 | 0 |
| Case 74 | 16 | 78,561,116 | 78,601,706 | 2 | 0 | 2 | 1 |
| Case 74 | 16 | 78,604,831 | 78,670,954 | 1 | 0 | 1 | 0 |
| Case 74 | 16 | 78,672,940 | 78,761,364 | 2 | 0 | 2 | 1 |
| Case 74 | 16 | 78,769,788 | 78,784,233 | 2 | 1 | 3 | 0 |
| Case 74 | 16 | 78,787,891 | 90,274,695 | 1 | 1 | 2 | 0 |
| Case 74 | 17 | 11,885     | 2,355,517  | 2 | 0 | 2 | 1 |
| Case 74 | 17 | 2,366,585  | 2,553,152  | 3 | 0 | 3 | 1 |
| Case 74 | 17 | 2,553,836  | 2,840,790  | 2 | 0 | 2 | 1 |
| Case 74 | 17 | 2,840,931  | 2,929,286  | 3 | 0 | 3 | 1 |
| Case 74 | 17 | 2,931,580  | 9,804,323  | 2 | 0 | 2 | 1 |
| Case 74 | 17 | 9,804,347  | 9,820,739  | 3 | 0 | 3 | 1 |
| Case 74 | 17 | 9,821,376  | 10,625,803 | 2 | 0 | 2 | 1 |
| Case 74 | 17 | 10,628,364 | 10,799,013 | 3 | 0 | 3 | 1 |
| Case 74 | 17 | 10,801,964 | 11,115,887 | 2 | 0 | 2 | 1 |
| Case 74 | 17 | 11,119,194 | 11,184,066 | 3 | 0 | 3 | 1 |
| Case 74 | 17 | 11,185,157 | 12,235,539 | 2 | 0 | 2 | 1 |
| Case 74 | 17 | 12,241,355 | 12,324,131 | 3 | 0 | 3 | 1 |
| Case 74 | 17 | 12,325,496 | 12,519,871 | 2 | 0 | 2 | 1 |
| Case 74 | 17 | 12,532,151 | 12,777,402 | 3 | 0 | 3 | 1 |
| Case 74 | 17 | 12,783,663 | 13,625,164 | 2 | 0 | 2 | 1 |
| Case 74 | 17 | 13,625,355 | 13,651,661 | 3 | 0 | 3 | 1 |
| Case 74 | 17 | 13,652,033 | 15,131,120 | 2 | 0 | 2 | 1 |
| Case 74 | 17 | 15,131,345 | 15,215,749 | 3 | 0 | 3 | 1 |
| Case 74 | 17 | 15,215,790 | 22,242,355 | 2 | 0 | 2 | 1 |
| Case 74 | 17 | 25,268,142 | 25,268,142 | 2 | 0 | 2 | 1 |
| Case 74 | 17 | 25,295,032 | 26,685,983 | 3 | 1 | 4 | 0 |
| Case 74 | 17 | 26,686,356 | 26,725,265 | 2 | 1 | 3 | 0 |
| Case 74 | 17 | 26,725,744 | 26,883,895 | 2 | 2 | 4 | 0 |
| Case 74 | 17 | 26,883,943 | 28,419,090 | 2 | 1 | 3 | 0 |
| Case 74 | 17 | 28,430,303 | 33,279,649 | 3 | 1 | 4 | 0 |
| Case 74 | 17 | 33,283,680 | 33,456,679 | 2 | 1 | 3 | 0 |
| Case 74 | 17 | 33,457,380 | 34,445,325 | 3 | 1 | 4 | 0 |
| Case 74 | 17 | 34,445,397 | 34,980,351 | 2 | 1 | 3 | 0 |
| Case 74 | 17 | 34,981,606 | 36,307,189 | 3 | 1 | 4 | 0 |
| Case 74 | 17 | 36,450,598 | 36,740,608 | 2 | 1 | 3 | 0 |
| Case 74 | 17 | 36,743,015 | 37,243,943 | 2 | 2 | 4 | 0 |
| Case 74 | 17 | 37,244,233 | 38,217,955 | 2 | 1 | 3 | 0 |
| Case 74 | 17 | 38,218,804 | 38,489,170 | 2 | 2 | 4 | 0 |
| Case 74 | 17 | 38,498,975 | 38,859,830 | 2 | 1 | 3 | 0 |
| Case 74 | 17 | 38,861,655 | 39,474,746 | 2 | 2 | 4 | 0 |
| Case 74 | 17 | 39,492,183 | 39,593,678 | 2 | 1 | 3 | 0 |
| Case 74 | 17 | 39,593,722 | 39,635,213 | 2 | 2 | 4 | 0 |
| Case 74 | 17 | 39,635,214 | 40,734,236 | 2 | 1 | 3 | 0 |
| Case 74 | 17 | 40,734,695 | 40,939,907 | 2 | 2 | 4 | 0 |
| Case 74 | 17 | 40,940,169 | 41,428,061 | 2 | 1 | 3 | 0 |
| Case 74 | 17 | 41,433,660 | 41,803,893 | 2 | 2 | 4 | 0 |
| Case 74 | 17 | 41,805,259 | 42,513,449 | 2 | 1 | 3 | 0 |
| Case 74 | 17 | 42,521,824 | 43,213,528 | 2 | 2 | 4 | 0 |
| Case 74 | 17 | 43,213,772 | 43,482,468 | 2 | 1 | 3 | 0 |

|         |    |            |            |   |   |   |   |
|---------|----|------------|------------|---|---|---|---|
| Case 74 | 17 | 43,483,774 | 45,232,055 | 2 | 2 | 4 | 0 |
| Case 74 | 17 | 45,232,068 | 45,278,790 | 2 | 1 | 3 | 0 |
| Case 74 | 17 | 45,281,257 | 46,871,642 | 2 | 2 | 4 | 0 |
| Case 74 | 17 | 46,872,346 | 47,036,073 | 2 | 1 | 3 | 0 |
| Case 74 | 17 | 47,038,257 | 48,141,461 | 2 | 2 | 4 | 0 |
| Case 74 | 17 | 48,145,094 | 48,746,681 | 2 | 1 | 3 | 0 |
| Case 74 | 17 | 48,746,823 | 55,158,811 | 2 | 2 | 4 | 0 |
| Case 74 | 17 | 55,161,161 | 55,189,972 | 2 | 1 | 3 | 0 |
| Case 74 | 17 | 55,190,509 | 55,346,970 | 2 | 2 | 4 | 0 |
| Case 74 | 17 | 55,351,266 | 55,495,136 | 2 | 1 | 3 | 0 |
| Case 74 | 17 | 55,495,293 | 55,901,017 | 2 | 2 | 4 | 0 |
| Case 74 | 17 | 55,901,677 | 56,388,021 | 2 | 1 | 3 | 0 |
| Case 74 | 17 | 56,388,102 | 61,683,718 | 2 | 2 | 4 | 0 |
| Case 74 | 17 | 61,684,557 | 62,377,812 | 2 | 1 | 3 | 0 |
| Case 74 | 17 | 62,380,287 | 62,476,451 | 2 | 2 | 4 | 0 |
| Case 74 | 17 | 62,479,069 | 63,226,943 | 2 | 1 | 3 | 0 |
| Case 74 | 17 | 63,227,804 | 65,874,187 | 2 | 2 | 4 | 0 |
| Case 74 | 17 | 65,882,373 | 66,154,676 | 2 | 1 | 3 | 0 |
| Case 74 | 17 | 66,163,231 | 71,163,788 | 2 | 2 | 4 | 0 |
| Case 74 | 17 | 71,164,081 | 71,228,767 | 2 | 1 | 3 | 0 |
| Case 74 | 17 | 71,230,318 | 71,689,995 | 2 | 2 | 4 | 0 |
| Case 74 | 17 | 71,695,322 | 71,822,155 | 2 | 1 | 3 | 0 |
| Case 74 | 17 | 71,825,523 | 72,216,777 | 2 | 2 | 4 | 0 |
| Case 74 | 17 | 72,222,024 | 72,588,900 | 2 | 1 | 3 | 0 |
| Case 74 | 17 | 72,589,264 | 72,709,744 | 2 | 2 | 4 | 0 |
| Case 74 | 17 | 72,710,796 | 74,774,825 | 2 | 1 | 3 | 0 |
| Case 74 | 17 | 74,779,369 | 75,889,612 | 2 | 2 | 4 | 0 |
| Case 74 | 17 | 75,896,182 | 76,157,199 | 2 | 1 | 3 | 0 |
| Case 74 | 17 | 76,157,266 | 76,404,655 | 2 | 2 | 4 | 0 |
| Case 74 | 17 | 76,410,977 | 76,571,560 | 2 | 1 | 3 | 0 |
| Case 74 | 17 | 76,571,579 | 76,656,357 | 2 | 2 | 4 | 0 |
| Case 74 | 17 | 76,657,198 | 77,350,553 | 2 | 1 | 3 | 0 |
| Case 74 | 17 | 77,355,148 | 77,674,058 | 2 | 2 | 4 | 0 |
| Case 74 | 17 | 77,686,881 | 77,815,296 | 2 | 1 | 3 | 0 |
| Case 74 | 17 | 77,821,891 | 77,914,561 | 2 | 2 | 4 | 0 |
| Case 74 | 17 | 77,914,743 | 78,406,036 | 2 | 1 | 3 | 0 |
| Case 74 | 17 | 78,407,991 | 78,446,932 | 2 | 2 | 4 | 0 |
| Case 74 | 17 | 78,447,050 | 81,060,040 | 2 | 1 | 3 | 0 |
| Case 74 | 18 | 87,505     | 1,200,631  | 3 | 1 | 4 | 0 |
| Case 74 | 18 | 1,202,623  | 1,681,354  | 4 | 1 | 5 | 0 |
| Case 74 | 18 | 1,683,704  | 1,738,361  | 3 | 1 | 4 | 0 |
| Case 74 | 18 | 1,741,653  | 8,778,916  | 4 | 0 | 4 | 1 |
| Case 74 | 18 | 8,781,129  | 8,784,723  | 3 | 0 | 3 | 1 |
| Case 74 | 18 | 8,784,791  | 12,926,924 | 4 | 0 | 4 | 1 |
| Case 74 | 18 | 12,927,114 | 13,114,441 | 3 | 0 | 3 | 1 |
| Case 74 | 18 | 13,116,432 | 13,279,646 | 4 | 0 | 4 | 1 |
| Case 74 | 18 | 13,281,865 | 13,815,680 | 3 | 0 | 3 | 1 |
| Case 74 | 18 | 13,819,673 | 14,942,150 | 4 | 0 | 4 | 1 |
| Case 74 | 18 | 14,949,001 | 15,102,421 | 3 | 0 | 3 | 1 |
| Case 74 | 18 | 15,249,516 | 15,375,878 | 3 | 1 | 4 | 0 |
| Case 74 | 18 | 18,520,354 | 19,437,171 | 3 | 1 | 4 | 0 |
| Case 74 | 18 | 19,444,613 | 19,993,920 | 4 | 1 | 5 | 0 |
| Case 74 | 18 | 19,994,344 | 22,808,077 | 3 | 1 | 4 | 0 |
| Case 74 | 18 | 22,812,508 | 23,404,581 | 4 | 1 | 5 | 0 |
| Case 74 | 18 | 23,405,782 | 23,501,282 | 3 | 1 | 4 | 0 |
| Case 74 | 18 | 23,504,011 | 23,794,220 | 4 | 1 | 5 | 0 |
| Case 74 | 18 | 23,798,169 | 24,627,226 | 3 | 1 | 4 | 0 |
| Case 74 | 18 | 24,627,676 | 27,227,209 | 4 | 1 | 5 | 0 |
| Case 74 | 18 | 27,229,214 | 27,506,375 | 3 | 1 | 4 | 0 |
| Case 74 | 18 | 27,506,384 | 28,570,779 | 4 | 1 | 5 | 0 |
| Case 74 | 18 | 28,571,063 | 29,930,576 | 3 | 1 | 4 | 0 |

|         |    |            |            |   |   |   |   |
|---------|----|------------|------------|---|---|---|---|
| Case 74 | 18 | 29,951,538 | 30,069,667 | 4 | 1 | 5 | 0 |
| Case 74 | 18 | 30,073,995 | 30,755,662 | 3 | 1 | 4 | 0 |
| Case 74 | 18 | 30,760,966 | 31,321,994 | 3 | 3 | 6 | 0 |
| Case 74 | 18 | 31,322,936 | 31,326,415 | 3 | 1 | 4 | 0 |
| Case 74 | 18 | 31,327,296 | 34,909,342 | 3 | 3 | 6 | 0 |
| Case 74 | 18 | 34,914,746 | 35,950,805 | 3 | 1 | 4 | 0 |
| Case 74 | 18 | 35,954,028 | 37,578,246 | 4 | 1 | 5 | 0 |
| Case 74 | 18 | 37,586,416 | 37,782,357 | 3 | 1 | 4 | 0 |
| Case 74 | 18 | 37,789,034 | 39,791,501 | 3 | 3 | 6 | 0 |
| Case 74 | 18 | 39,796,448 | 39,796,448 | 3 | 1 | 4 | 0 |
| Case 74 | 18 | 39,796,976 | 42,231,196 | 3 | 2 | 5 | 0 |
| Case 74 | 18 | 42,240,410 | 42,456,653 | 2 | 2 | 4 | 0 |
| Case 74 | 18 | 42,458,434 | 44,015,319 | 3 | 1 | 4 | 0 |
| Case 74 | 18 | 44,015,643 | 46,041,755 | 4 | 0 | 4 | 1 |
| Case 74 | 18 | 46,044,052 | 46,490,181 | 3 | 0 | 3 | 1 |
| Case 74 | 18 | 46,499,079 | 62,652,214 | 4 | 0 | 4 | 1 |
| Case 74 | 18 | 62,676,117 | 71,494,718 | 2 | 0 | 2 | 1 |
| Case 74 | 18 | 71,496,928 | 71,568,010 | 3 | 0 | 3 | 1 |
| Case 74 | 18 | 71,568,861 | 72,734,429 | 2 | 0 | 2 | 1 |
| Case 74 | 18 | 72,738,855 | 72,841,513 | 3 | 0 | 3 | 1 |
| Case 74 | 18 | 72,845,315 | 72,945,714 | 2 | 0 | 2 | 1 |
| Case 74 | 18 | 72,946,298 | 73,003,038 | 3 | 0 | 3 | 1 |
| Case 74 | 18 | 73,003,490 | 78,015,180 | 2 | 0 | 2 | 1 |
| Case 74 | 19 | 260,912    | 13,135,981 | 2 | 0 | 2 | 1 |
| Case 74 | 19 | 13,153,035 | 20,430,665 | 3 | 0 | 3 | 1 |
| Case 74 | 19 | 20,435,660 | 20,500,515 | 2 | 0 | 2 | 1 |
| Case 74 | 19 | 20,626,179 | 20,626,179 | 1 | 0 | 1 | 0 |
| Case 74 | 19 | 20,630,360 | 20,715,228 | 0 | 0 | 0 | 0 |
| Case 74 | 19 | 20,726,622 | 23,814,365 | 2 | 0 | 2 | 1 |
| Case 74 | 19 | 23,829,737 | 23,930,879 | 1 | 0 | 1 | 0 |
| Case 74 | 19 | 23,937,693 | 24,629,285 | 2 | 0 | 2 | 1 |
| Case 74 | 19 | 27,732,159 | 27,763,440 | 2 | 0 | 2 | 1 |
| Case 74 | 19 | 27,801,814 | 28,443,974 | 4 | 1 | 5 | 0 |
| Case 74 | 19 | 28,444,957 | 28,817,506 | 3 | 1 | 4 | 0 |
| Case 74 | 19 | 28,818,232 | 29,326,179 | 4 | 1 | 5 | 0 |
| Case 74 | 19 | 29,327,736 | 29,420,446 | 2 | 2 | 4 | 0 |
| Case 74 | 19 | 29,436,748 | 30,496,597 | 5 | 1 | 6 | 0 |
| Case 74 | 19 | 30,497,886 | 30,497,886 | 2 | 1 | 3 | 0 |
| Case 74 | 19 | 30,498,452 | 30,726,034 | 4 | 1 | 5 | 0 |
| Case 74 | 19 | 30,730,695 | 30,747,112 | 2 | 2 | 4 | 0 |
| Case 74 | 19 | 30,753,815 | 41,341,589 | 2 | 1 | 3 | 0 |
| Case 74 | 19 | 41,350,895 | 41,362,173 | 1 | 0 | 1 | 0 |
| Case 74 | 19 | 41,363,301 | 41,379,148 | 0 | 0 | 0 | 0 |
| Case 74 | 19 | 41,382,476 | 41,382,476 | 2 | 0 | 2 | 1 |
| Case 74 | 19 | 41,383,115 | 42,202,285 | 2 | 1 | 3 | 0 |
| Case 74 | 19 | 42,206,950 | 42,377,133 | 2 | 2 | 4 | 0 |
| Case 74 | 19 | 42,381,387 | 43,328,006 | 2 | 1 | 3 | 0 |
| Case 74 | 19 | 43,344,686 | 43,439,793 | 1 | 0 | 1 | 0 |
| Case 74 | 19 | 43,441,194 | 43,519,304 | 0 | 0 | 0 | 0 |
| Case 74 | 19 | 43,519,442 | 43,519,442 | 1 | 0 | 1 | 0 |
| Case 74 | 19 | 43,523,068 | 43,539,189 | 2 | 0 | 2 | 1 |
| Case 74 | 19 | 43,556,843 | 49,104,308 | 2 | 1 | 3 | 0 |
| Case 74 | 19 | 49,104,466 | 49,812,355 | 1 | 1 | 2 | 0 |
| Case 74 | 19 | 49,812,403 | 59,097,160 | 2 | 1 | 3 | 0 |
| Case 74 | 20 | 63,244     | 6,799,849  | 3 | 1 | 4 | 0 |
| Case 74 | 20 | 6,809,340  | 8,573,437  | 4 | 1 | 5 | 0 |
| Case 74 | 20 | 8,575,333  | 10,282,027 | 3 | 1 | 4 | 0 |
| Case 74 | 20 | 10,283,950 | 10,383,981 | 4 | 1 | 5 | 0 |
| Case 74 | 20 | 10,384,819 | 11,092,044 | 3 | 1 | 4 | 0 |
| Case 74 | 20 | 11,092,242 | 11,320,829 | 4 | 1 | 5 | 0 |
| Case 74 | 20 | 11,333,305 | 13,520,928 | 3 | 1 | 4 | 0 |

|         |    |            |            |   |   |   |   |
|---------|----|------------|------------|---|---|---|---|
| Case 74 | 20 | 13,526,577 | 13,846,136 | 3 | 3 | 6 | 0 |
| Case 74 | 20 | 13,846,148 | 13,846,148 | 3 | 1 | 4 | 0 |
| Case 74 | 20 | 13,850,169 | 14,054,163 | 4 | 1 | 5 | 0 |
| Case 74 | 20 | 14,055,947 | 15,245,592 | 3 | 1 | 4 | 0 |
| Case 74 | 20 | 15,246,472 | 15,873,776 | 4 | 1 | 5 | 0 |
| Case 74 | 20 | 15,874,325 | 20,616,052 | 3 | 1 | 4 | 0 |
| Case 74 | 20 | 20,619,263 | 20,823,149 | 4 | 1 | 5 | 0 |
| Case 74 | 20 | 20,823,718 | 26,293,985 | 3 | 1 | 4 | 0 |
| Case 74 | 20 | 29,425,357 | 38,160,374 | 3 | 1 | 4 | 0 |
| Case 74 | 20 | 38,161,430 | 39,623,283 | 4 | 1 | 5 | 0 |
| Case 74 | 20 | 39,634,488 | 40,359,654 | 3 | 1 | 4 | 0 |
| Case 74 | 20 | 40,360,853 | 40,706,494 | 4 | 1 | 5 | 0 |
| Case 74 | 20 | 40,707,709 | 45,461,021 | 3 | 1 | 4 | 0 |
| Case 74 | 20 | 45,470,048 | 45,558,037 | 4 | 1 | 5 | 0 |
| Case 74 | 20 | 45,558,178 | 50,652,937 | 3 | 1 | 4 | 0 |
| Case 74 | 20 | 50,654,400 | 50,701,061 | 4 | 1 | 5 | 0 |
| Case 74 | 20 | 50,701,128 | 51,197,000 | 3 | 1 | 4 | 0 |
| Case 74 | 20 | 51,199,343 | 51,551,395 | 4 | 1 | 5 | 0 |
| Case 74 | 20 | 51,552,422 | 53,270,624 | 3 | 1 | 4 | 0 |
| Case 74 | 20 | 53,283,735 | 54,484,014 | 4 | 1 | 5 | 0 |
| Case 74 | 20 | 54,489,899 | 60,699,715 | 3 | 1 | 4 | 0 |
| Case 74 | 20 | 60,704,910 | 60,793,712 | 2 | 1 | 3 | 0 |
| Case 74 | 20 | 60,797,558 | 61,512,691 | 3 | 1 | 4 | 0 |
| Case 74 | 20 | 61,512,908 | 61,578,610 | 2 | 1 | 3 | 0 |
| Case 74 | 20 | 61,582,757 | 62,190,345 | 3 | 1 | 4 | 0 |
| Case 74 | 20 | 62,190,628 | 62,193,253 | 2 | 1 | 3 | 0 |
| Case 74 | 20 | 62,193,445 | 62,948,788 | 3 | 1 | 4 | 0 |
| Case 74 | 21 | 10,827,533 | 10,942,992 | 1 | 1 | 2 | 0 |
| Case 74 | 21 | 10,970,025 | 10,971,337 | 2 | 1 | 3 | 0 |
| Case 74 | 21 | 14,368,320 | 17,877,318 | 2 | 1 | 3 | 0 |
| Case 74 | 21 | 17,877,794 | 19,526,240 | 3 | 1 | 4 | 0 |
| Case 74 | 21 | 19,526,572 | 20,020,025 | 4 | 1 | 5 | 0 |
| Case 74 | 21 | 20,028,118 | 23,294,509 | 3 | 1 | 4 | 0 |
| Case 74 | 21 | 23,295,949 | 27,178,550 | 2 | 1 | 3 | 0 |
| Case 74 | 21 | 27,194,869 | 27,225,043 | 1 | 0 | 1 | 0 |
| Case 74 | 21 | 27,242,396 | 39,615,764 | 2 | 1 | 3 | 0 |
| Case 74 | 21 | 39,626,421 | 42,731,511 | 2 | 2 | 4 | 0 |
| Case 74 | 21 | 42,734,987 | 42,817,582 | 2 | 1 | 3 | 0 |
| Case 74 | 21 | 42,817,612 | 43,499,442 | 2 | 2 | 4 | 0 |
| Case 74 | 21 | 43,501,351 | 43,531,494 | 2 | 1 | 3 | 0 |
| Case 74 | 21 | 43,531,553 | 43,645,809 | 2 | 2 | 4 | 0 |
| Case 74 | 21 | 43,646,024 | 43,767,723 | 2 | 1 | 3 | 0 |
| Case 74 | 21 | 43,768,324 | 43,806,193 | 2 | 2 | 4 | 0 |
| Case 74 | 21 | 43,808,004 | 44,007,516 | 2 | 1 | 3 | 0 |
| Case 74 | 21 | 44,022,258 | 44,323,814 | 2 | 2 | 4 | 0 |
| Case 74 | 21 | 44,323,948 | 44,716,050 | 2 | 1 | 3 | 0 |
| Case 74 | 21 | 44,717,036 | 45,149,133 | 2 | 2 | 4 | 0 |
| Case 74 | 21 | 45,151,874 | 45,595,060 | 2 | 1 | 3 | 0 |
| Case 74 | 21 | 45,595,124 | 45,649,954 | 2 | 2 | 4 | 0 |
| Case 74 | 21 | 45,649,969 | 46,127,549 | 2 | 1 | 3 | 0 |
| Case 74 | 21 | 46,128,238 | 46,440,385 | 2 | 2 | 4 | 0 |
| Case 74 | 21 | 46,441,947 | 46,764,297 | 2 | 1 | 3 | 0 |
| Case 74 | 21 | 46,764,433 | 46,848,589 | 2 | 2 | 4 | 0 |
| Case 74 | 21 | 46,854,982 | 47,473,588 | 2 | 1 | 3 | 0 |
| Case 74 | 21 | 47,476,248 | 47,548,555 | 2 | 2 | 4 | 0 |
| Case 74 | 21 | 47,548,825 | 47,599,176 | 2 | 1 | 3 | 0 |
| Case 74 | 21 | 47,602,691 | 47,614,660 | 2 | 2 | 4 | 0 |
| Case 74 | 21 | 47,626,586 | 48,100,155 | 2 | 1 | 3 | 0 |
| Case 74 | 22 | 16,114,244 | 28,545,264 | 1 | 1 | 2 | 0 |
| Case 74 | 22 | 28,550,006 | 28,603,212 | 2 | 1 | 3 | 0 |
| Case 74 | 22 | 28,604,583 | 28,672,406 | 2 | 0 | 2 | 1 |

|         |    |             |             |   |   |   |   |
|---------|----|-------------|-------------|---|---|---|---|
| Case 74 | 22 | 28,682,616  | 28,682,616  | 2 | 1 | 3 | 0 |
| Case 74 | 22 | 28,691,681  | 37,858,097  | 1 | 1 | 2 | 0 |
| Case 74 | 22 | 37,863,459  | 37,995,452  | 2 | 1 | 3 | 0 |
| Case 74 | 22 | 38,003,070  | 51,195,728  | 1 | 1 | 2 | 0 |
| Case 75 | 1  | 82,154      | 27,789,223  | 2 | 1 | 3 | 0 |
| Case 75 | 1  | 27,836,014  | 28,109,039  | 2 | 2 | 4 | 0 |
| Case 75 | 1  | 28,128,190  | 39,550,621  | 2 | 1 | 3 | 0 |
| Case 75 | 1  | 39,551,621  | 39,624,761  | 2 | 2 | 4 | 0 |
| Case 75 | 1  | 39,626,381  | 43,870,091  | 2 | 1 | 3 | 0 |
| Case 75 | 1  | 43,872,067  | 44,084,819  | 3 | 1 | 4 | 0 |
| Case 75 | 1  | 44,084,975  | 64,059,266  | 2 | 1 | 3 | 0 |
| Case 75 | 1  | 64,059,403  | 64,374,159  | 2 | 2 | 4 | 0 |
| Case 75 | 1  | 64,381,917  | 72,428,834  | 2 | 1 | 3 | 0 |
| Case 75 | 1  | 72,433,346  | 121,088,479 | 2 | 2 | 4 | 0 |
| Case 75 | 1  | 121,164,607 | 121,346,616 | 3 | 0 | 3 | 1 |
| Case 75 | 1  | 142,649,718 | 145,560,893 | 3 | 2 | 5 | 0 |
| Case 75 | 1  | 145,560,900 | 149,855,296 | 3 | 3 | 6 | 0 |
| Case 75 | 1  | 149,856,350 | 150,529,738 | 4 | 1 | 5 | 0 |
| Case 75 | 1  | 150,530,009 | 150,857,664 | 4 | 2 | 6 | 0 |
| Case 75 | 1  | 150,860,471 | 151,395,782 | 4 | 1 | 5 | 0 |
| Case 75 | 1  | 151,396,443 | 151,491,836 | 4 | 2 | 6 | 0 |
| Case 75 | 1  | 151,492,700 | 151,554,166 | 4 | 1 | 5 | 0 |
| Case 75 | 1  | 151,554,503 | 152,028,561 | 4 | 2 | 6 | 0 |
| Case 75 | 1  | 152,037,515 | 152,383,131 | 3 | 2 | 5 | 0 |
| Case 75 | 1  | 152,383,266 | 152,724,053 | 3 | 3 | 6 | 0 |
| Case 75 | 1  | 152,728,472 | 152,732,174 | 5 | 2 | 7 | 0 |
| Case 75 | 1  | 152,732,299 | 152,958,133 | 3 | 2 | 5 | 0 |
| Case 75 | 1  | 152,958,166 | 153,507,787 | 3 | 3 | 6 | 0 |
| Case 75 | 1  | 153,507,809 | 153,963,239 | 3 | 2 | 5 | 0 |
| Case 75 | 1  | 153,964,542 | 154,849,590 | 3 | 3 | 6 | 0 |
| Case 75 | 1  | 154,896,032 | 154,896,032 | 5 | 2 | 7 | 0 |
| Case 75 | 1  | 154,898,881 | 156,848,995 | 3 | 2 | 5 | 0 |
| Case 75 | 1  | 156,849,792 | 158,388,434 | 3 | 3 | 6 | 0 |
| Case 75 | 1  | 158,389,793 | 158,549,572 | 4 | 1 | 5 | 0 |
| Case 75 | 1  | 158,549,577 | 158,590,241 | 4 | 2 | 6 | 0 |
| Case 75 | 1  | 158,592,846 | 158,687,796 | 3 | 2 | 5 | 0 |
| Case 75 | 1  | 158,687,821 | 159,796,512 | 3 | 3 | 6 | 0 |
| Case 75 | 1  | 159,796,689 | 159,796,701 | 5 | 2 | 7 | 0 |
| Case 75 | 1  | 159,798,306 | 160,013,353 | 3 | 2 | 5 | 0 |
| Case 75 | 1  | 160,023,053 | 160,933,467 | 3 | 3 | 6 | 0 |
| Case 75 | 1  | 160,937,964 | 160,956,745 | 5 | 2 | 7 | 0 |
| Case 75 | 1  | 160,959,844 | 161,168,120 | 3 | 2 | 5 | 0 |
| Case 75 | 1  | 161,168,135 | 165,199,343 | 3 | 3 | 6 | 0 |
| Case 75 | 1  | 165,207,875 | 165,226,552 | 4 | 1 | 5 | 0 |
| Case 75 | 1  | 165,228,470 | 165,465,281 | 4 | 2 | 6 | 0 |
| Case 75 | 1  | 165,465,858 | 165,721,403 | 4 | 1 | 5 | 0 |
| Case 75 | 1  | 165,726,278 | 167,016,853 | 4 | 2 | 6 | 0 |
| Case 75 | 1  | 167,016,898 | 167,097,945 | 4 | 1 | 5 | 0 |
| Case 75 | 1  | 167,100,361 | 167,847,584 | 4 | 2 | 6 | 0 |
| Case 75 | 1  | 167,847,610 | 168,074,677 | 4 | 1 | 5 | 0 |
| Case 75 | 1  | 168,074,746 | 169,499,000 | 4 | 2 | 6 | 0 |
| Case 75 | 1  | 169,499,020 | 169,623,680 | 4 | 1 | 5 | 0 |
| Case 75 | 1  | 169,647,046 | 170,928,671 | 4 | 2 | 6 | 0 |
| Case 75 | 1  | 170,928,730 | 170,982,001 | 4 | 1 | 5 | 0 |
| Case 75 | 1  | 170,984,413 | 173,832,806 | 4 | 2 | 6 | 0 |
| Case 75 | 1  | 173,835,211 | 174,611,708 | 4 | 1 | 5 | 0 |
| Case 75 | 1  | 174,623,077 | 174,715,051 | 2 | 0 | 2 | 1 |
| Case 75 | 1  | 174,781,083 | 175,041,977 | 4 | 2 | 6 | 0 |
| Case 75 | 1  | 175,046,557 | 175,735,380 | 4 | 1 | 5 | 0 |
| Case 75 | 1  | 175,739,003 | 176,453,688 | 4 | 2 | 6 | 0 |
| Case 75 | 1  | 176,457,223 | 177,074,045 | 4 | 1 | 5 | 0 |



|         |   |             |             |   |   |   |   |
|---------|---|-------------|-------------|---|---|---|---|
| Case 75 | 1 | 177,074,669 | 177,639,015 | 4 | 2 | 6 | 0 |
| Case 75 | 1 | 177,648,733 | 178,686,299 | 4 | 1 | 5 | 0 |
| Case 75 | 1 | 178,686,331 | 179,039,044 | 4 | 2 | 6 | 0 |
| Case 75 | 1 | 179,039,055 | 179,100,545 | 4 | 1 | 5 | 0 |
| Case 75 | 1 | 179,100,604 | 179,960,787 | 4 | 2 | 6 | 0 |
| Case 75 | 1 | 179,961,257 | 180,214,469 | 4 | 1 | 5 | 0 |
| Case 75 | 1 | 180,217,250 | 180,897,684 | 4 | 2 | 6 | 0 |
| Case 75 | 1 | 180,897,709 | 181,307,883 | 4 | 1 | 5 | 0 |
| Case 75 | 1 | 181,309,400 | 182,353,075 | 4 | 2 | 6 | 0 |
| Case 75 | 1 | 182,353,781 | 182,632,455 | 4 | 1 | 5 | 0 |
| Case 75 | 1 | 182,640,864 | 183,061,890 | 4 | 2 | 6 | 0 |
| Case 75 | 1 | 183,071,024 | 183,113,952 | 4 | 1 | 5 | 0 |
| Case 75 | 1 | 183,114,119 | 183,831,786 | 4 | 2 | 6 | 0 |
| Case 75 | 1 | 183,834,061 | 184,792,315 | 4 | 1 | 5 | 0 |
| Case 75 | 1 | 184,792,432 | 186,065,257 | 4 | 2 | 6 | 0 |
| Case 75 | 1 | 186,072,691 | 186,948,448 | 4 | 1 | 5 | 0 |
| Case 75 | 1 | 186,951,429 | 187,232,021 | 4 | 2 | 6 | 0 |
| Case 75 | 1 | 187,233,995 | 187,760,345 | 3 | 2 | 5 | 0 |
| Case 75 | 1 | 187,763,860 | 188,477,749 | 4 | 2 | 6 | 0 |
| Case 75 | 1 | 188,484,287 | 190,080,733 | 3 | 2 | 5 | 0 |
| Case 75 | 1 | 190,086,179 | 190,399,621 | 4 | 2 | 6 | 0 |
| Case 75 | 1 | 190,399,946 | 190,506,603 | 3 | 2 | 5 | 0 |
| Case 75 | 1 | 190,514,183 | 192,314,681 | 4 | 2 | 6 | 0 |
| Case 75 | 1 | 192,316,469 | 194,329,737 | 3 | 2 | 5 | 0 |
| Case 75 | 1 | 194,334,907 | 196,014,544 | 4 | 2 | 6 | 0 |
| Case 75 | 1 | 196,017,926 | 199,691,458 | 3 | 2 | 5 | 0 |
| Case 75 | 1 | 199,707,262 | 200,234,381 | 4 | 2 | 6 | 0 |
| Case 75 | 1 | 200,247,025 | 200,405,735 | 4 | 1 | 5 | 0 |
| Case 75 | 1 | 200,417,272 | 200,521,412 | 4 | 2 | 6 | 0 |
| Case 75 | 1 | 200,522,495 | 205,633,751 | 3 | 2 | 5 | 0 |
| Case 75 | 1 | 205,639,045 | 205,785,932 | 4 | 2 | 6 | 0 |
| Case 75 | 1 | 205,786,935 | 208,061,106 | 3 | 2 | 5 | 0 |
| Case 75 | 1 | 208,061,142 | 208,390,162 | 4 | 2 | 6 | 0 |
| Case 75 | 1 | 208,390,364 | 211,073,277 | 3 | 2 | 5 | 0 |
| Case 75 | 1 | 211,077,299 | 211,405,423 | 4 | 2 | 6 | 0 |
| Case 75 | 1 | 211,408,176 | 213,759,712 | 3 | 2 | 5 | 0 |
| Case 75 | 1 | 213,760,845 | 214,462,988 | 4 | 2 | 6 | 0 |
| Case 75 | 1 | 214,465,791 | 217,154,258 | 3 | 2 | 5 | 0 |
| Case 75 | 1 | 217,159,448 | 217,414,922 | 4 | 2 | 6 | 0 |
| Case 75 | 1 | 217,417,838 | 217,955,553 | 3 | 2 | 5 | 0 |
| Case 75 | 1 | 217,966,125 | 218,162,375 | 4 | 2 | 6 | 0 |
| Case 75 | 1 | 218,162,453 | 219,412,715 | 3 | 2 | 5 | 0 |
| Case 75 | 1 | 219,446,253 | 219,700,519 | 4 | 2 | 6 | 0 |
| Case 75 | 1 | 219,705,205 | 223,609,583 | 3 | 2 | 5 | 0 |
| Case 75 | 1 | 223,611,033 | 223,653,362 | 4 | 2 | 6 | 0 |
| Case 75 | 1 | 223,655,061 | 225,126,877 | 3 | 2 | 5 | 0 |
| Case 75 | 1 | 225,137,134 | 225,540,100 | 4 | 2 | 6 | 0 |
| Case 75 | 1 | 225,548,126 | 233,533,418 | 3 | 2 | 5 | 0 |
| Case 75 | 1 | 233,534,615 | 233,636,625 | 4 | 2 | 6 | 0 |
| Case 75 | 1 | 233,643,110 | 238,301,369 | 3 | 2 | 5 | 0 |
| Case 75 | 1 | 238,303,362 | 238,446,854 | 4 | 2 | 6 | 0 |
| Case 75 | 1 | 238,451,820 | 240,680,789 | 3 | 2 | 5 | 0 |
| Case 75 | 1 | 240,680,957 | 240,871,487 | 4 | 2 | 6 | 0 |
| Case 75 | 1 | 240,872,887 | 240,933,445 | 6 | 1 | 7 | 0 |
| Case 75 | 1 | 240,933,895 | 240,934,837 | 2 | 2 | 4 | 0 |
| Case 75 | 1 | 240,937,073 | 242,380,948 | 3 | 2 | 5 | 0 |
| Case 75 | 1 | 242,381,784 | 242,842,300 | 4 | 2 | 6 | 0 |
| Case 75 | 1 | 242,854,134 | 248,411,889 | 3 | 2 | 5 | 0 |
| Case 75 | 1 | 248,415,662 | 248,440,362 | 4 | 2 | 6 | 0 |
| Case 75 | 1 | 248,455,512 | 249,218,992 | 3 | 2 | 5 | 0 |
| Case 75 | 2 | 18,674      | 14,515,498  | 3 | 1 | 4 | 0 |

|         |   |             |             |   |   |   |   |
|---------|---|-------------|-------------|---|---|---|---|
| Case 75 | 2 | 14,515,733  | 14,515,733  | 4 | 1 | 5 | 0 |
| Case 75 | 2 | 14,525,844  | 14,525,844  | 2 | 0 | 2 | 1 |
| Case 75 | 2 | 14,528,945  | 14,601,354  | 1 | 0 | 1 | 0 |
| Case 75 | 2 | 14,610,061  | 14,632,564  | 2 | 0 | 2 | 1 |
| Case 75 | 2 | 14,648,430  | 14,648,430  | 3 | 0 | 3 | 1 |
| Case 75 | 2 | 14,651,181  | 47,483,905  | 3 | 1 | 4 | 0 |
| Case 75 | 2 | 47,484,256  | 62,448,855  | 2 | 1 | 3 | 0 |
| Case 75 | 2 | 62,449,428  | 62,720,684  | 3 | 1 | 4 | 0 |
| Case 75 | 2 | 62,722,292  | 74,370,612  | 2 | 1 | 3 | 0 |
| Case 75 | 2 | 74,372,348  | 77,429,576  | 2 | 2 | 4 | 0 |
| Case 75 | 2 | 77,437,279  | 78,594,007  | 2 | 0 | 2 | 1 |
| Case 75 | 2 | 78,617,965  | 78,696,239  | 0 | 0 | 0 | 0 |
| Case 75 | 2 | 78,699,428  | 79,189,199  | 2 | 0 | 2 | 1 |
| Case 75 | 2 | 79,190,408  | 79,568,621  | 3 | 0 | 3 | 1 |
| Case 75 | 2 | 79,573,515  | 80,177,744  | 2 | 0 | 2 | 1 |
| Case 75 | 2 | 80,178,514  | 80,215,228  | 3 | 0 | 3 | 1 |
| Case 75 | 2 | 80,216,176  | 80,474,158  | 2 | 0 | 2 | 1 |
| Case 75 | 2 | 80,476,142  | 80,551,464  | 3 | 0 | 3 | 1 |
| Case 75 | 2 | 80,553,514  | 83,390,541  | 2 | 0 | 2 | 1 |
| Case 75 | 2 | 83,391,938  | 83,446,208  | 3 | 0 | 3 | 1 |
| Case 75 | 2 | 83,448,159  | 83,857,943  | 2 | 0 | 2 | 1 |
| Case 75 | 2 | 83,863,422  | 84,112,346  | 3 | 0 | 3 | 1 |
| Case 75 | 2 | 84,116,856  | 84,246,586  | 2 | 0 | 2 | 1 |
| Case 75 | 2 | 84,248,820  | 84,536,960  | 3 | 0 | 3 | 1 |
| Case 75 | 2 | 84,537,078  | 84,913,635  | 2 | 0 | 2 | 1 |
| Case 75 | 2 | 84,921,433  | 86,389,144  | 3 | 0 | 3 | 1 |
| Case 75 | 2 | 86,398,008  | 86,433,271  | 2 | 0 | 2 | 1 |
| Case 75 | 2 | 86,433,396  | 86,678,235  | 3 | 0 | 3 | 1 |
| Case 75 | 2 | 86,683,566  | 87,009,742  | 2 | 0 | 2 | 1 |
| Case 75 | 2 | 87,009,992  | 88,857,275  | 3 | 0 | 3 | 1 |
| Case 75 | 2 | 88,857,452  | 88,935,607  | 2 | 0 | 2 | 1 |
| Case 75 | 2 | 88,954,540  | 92,050,792  | 3 | 0 | 3 | 1 |
| Case 75 | 2 | 92,081,640  | 92,081,640  | 4 | 0 | 4 | 1 |
| Case 75 | 2 | 95,429,424  | 130,885,891 | 4 | 0 | 4 | 1 |
| Case 75 | 2 | 130,890,386 | 140,380,671 | 3 | 0 | 3 | 1 |
| Case 75 | 2 | 140,395,703 | 141,806,707 | 3 | 2 | 5 | 0 |
| Case 75 | 2 | 141,810,244 | 146,752,161 | 3 | 0 | 3 | 1 |
| Case 75 | 2 | 146,764,156 | 152,293,370 | 3 | 2 | 5 | 0 |
| Case 75 | 2 | 152,293,775 | 152,331,418 | 2 | 2 | 4 | 0 |
| Case 75 | 2 | 152,331,745 | 163,059,592 | 3 | 2 | 5 | 0 |
| Case 75 | 2 | 163,063,913 | 163,311,202 | 2 | 2 | 4 | 0 |
| Case 75 | 2 | 163,321,014 | 168,096,375 | 3 | 2 | 5 | 0 |
| Case 75 | 2 | 168,096,408 | 168,115,325 | 2 | 2 | 4 | 0 |
| Case 75 | 2 | 168,115,346 | 169,985,338 | 3 | 2 | 5 | 0 |
| Case 75 | 2 | 169,989,127 | 170,132,243 | 2 | 2 | 4 | 0 |
| Case 75 | 2 | 170,133,086 | 179,298,734 | 3 | 2 | 5 | 0 |
| Case 75 | 2 | 179,300,979 | 179,643,656 | 2 | 2 | 4 | 0 |
| Case 75 | 2 | 179,643,775 | 187,867,340 | 3 | 2 | 5 | 0 |
| Case 75 | 2 | 187,880,937 | 188,343,515 | 2 | 2 | 4 | 0 |
| Case 75 | 2 | 188,348,943 | 196,545,025 | 3 | 2 | 5 | 0 |
| Case 75 | 2 | 196,545,314 | 196,771,409 | 2 | 2 | 4 | 0 |
| Case 75 | 2 | 196,771,454 | 197,521,487 | 3 | 2 | 5 | 0 |
| Case 75 | 2 | 197,521,750 | 197,797,224 | 2 | 2 | 4 | 0 |
| Case 75 | 2 | 197,799,124 | 201,722,431 | 3 | 2 | 5 | 0 |
| Case 75 | 2 | 201,724,114 | 202,401,019 | 2 | 2 | 4 | 0 |
| Case 75 | 2 | 202,402,532 | 205,834,111 | 3 | 2 | 5 | 0 |
| Case 75 | 2 | 205,843,303 | 206,125,313 | 4 | 2 | 6 | 0 |
| Case 75 | 2 | 206,127,438 | 206,135,584 | 3 | 2 | 5 | 0 |
| Case 75 | 2 | 206,139,804 | 206,306,315 | 2 | 2 | 4 | 0 |
| Case 75 | 2 | 206,318,593 | 206,461,610 | 3 | 0 | 3 | 1 |
| Case 75 | 2 | 206,464,465 | 225,938,996 | 2 | 2 | 4 | 0 |

|         |   |             |             |   |   |   |   |
|---------|---|-------------|-------------|---|---|---|---|
| Case 75 | 2 | 225,943,606 | 226,041,219 | 3 | 2 | 5 | 0 |
| Case 75 | 2 | 226,053,521 | 234,630,900 | 2 | 2 | 4 | 0 |
| Case 75 | 2 | 234,635,467 | 234,637,569 | 2 | 0 | 2 | 1 |
| Case 75 | 2 | 234,637,789 | 234,653,938 | 2 | 2 | 4 | 0 |
| Case 75 | 2 | 234,655,144 | 234,665,659 | 3 | 2 | 5 | 0 |
| Case 75 | 2 | 234,666,461 | 243,048,760 | 2 | 2 | 4 | 0 |
| Case 75 | 3 | 61,495      | 11,674,229  | 5 | 0 | 5 | 1 |
| Case 75 | 3 | 11,675,789  | 11,675,789  | 3 | 0 | 3 | 1 |
| Case 75 | 3 | 11,677,077  | 11,932,455  | 6 | 0 | 6 | 1 |
| Case 75 | 3 | 11,940,847  | 11,940,847  | 3 | 0 | 3 | 1 |
| Case 75 | 3 | 11,942,561  | 36,649,929  | 5 | 0 | 5 | 1 |
| Case 75 | 3 | 36,670,483  | 41,973,462  | 3 | 0 | 3 | 1 |
| Case 75 | 3 | 41,985,152  | 42,392,724  | 4 | 0 | 4 | 1 |
| Case 75 | 3 | 42,394,422  | 42,956,738  | 3 | 0 | 3 | 1 |
| Case 75 | 3 | 42,956,773  | 43,122,685  | 4 | 0 | 4 | 1 |
| Case 75 | 3 | 43,122,805  | 44,965,169  | 3 | 0 | 3 | 1 |
| Case 75 | 3 | 44,974,404  | 45,371,605  | 4 | 0 | 4 | 1 |
| Case 75 | 3 | 45,377,129  | 45,637,755  | 3 | 0 | 3 | 1 |
| Case 75 | 3 | 45,637,765  | 45,834,811  | 4 | 0 | 4 | 1 |
| Case 75 | 3 | 45,837,875  | 53,096,394  | 3 | 0 | 3 | 1 |
| Case 75 | 3 | 53,098,775  | 53,852,835  | 4 | 0 | 4 | 1 |
| Case 75 | 3 | 53,853,009  | 55,390,886  | 3 | 0 | 3 | 1 |
| Case 75 | 3 | 55,393,851  | 55,556,129  | 4 | 0 | 4 | 1 |
| Case 75 | 3 | 55,566,996  | 57,914,178  | 3 | 0 | 3 | 1 |
| Case 75 | 3 | 57,945,243  | 58,112,489  | 4 | 0 | 4 | 1 |
| Case 75 | 3 | 58,114,655  | 58,279,442  | 3 | 0 | 3 | 1 |
| Case 75 | 3 | 58,280,406  | 58,711,094  | 4 | 0 | 4 | 1 |
| Case 75 | 3 | 58,728,125  | 60,022,109  | 3 | 0 | 3 | 1 |
| Case 75 | 3 | 60,022,161  | 60,095,604  | 2 | 0 | 2 | 1 |
| Case 75 | 3 | 60,095,853  | 61,432,694  | 3 | 0 | 3 | 1 |
| Case 75 | 3 | 61,438,210  | 61,635,713  | 4 | 0 | 4 | 1 |
| Case 75 | 3 | 61,638,592  | 71,989,201  | 3 | 0 | 3 | 1 |
| Case 75 | 3 | 71,992,763  | 72,109,408  | 4 | 0 | 4 | 1 |
| Case 75 | 3 | 72,110,578  | 86,860,115  | 3 | 0 | 3 | 1 |
| Case 75 | 3 | 86,890,846  | 90,442,925  | 3 | 1 | 4 | 0 |
| Case 75 | 3 | 93,537,290  | 93,803,000  | 3 | 1 | 4 | 0 |
| Case 75 | 3 | 93,803,041  | 102,935,573 | 2 | 1 | 3 | 0 |
| Case 75 | 3 | 102,946,216 | 103,061,020 | 4 | 1 | 5 | 0 |
| Case 75 | 3 | 103,062,026 | 119,585,455 | 2 | 1 | 3 | 0 |
| Case 75 | 3 | 119,594,488 | 119,839,546 | 2 | 2 | 4 | 0 |
| Case 75 | 3 | 119,839,869 | 122,082,241 | 2 | 1 | 3 | 0 |
| Case 75 | 3 | 122,087,415 | 125,410,843 | 3 | 1 | 4 | 0 |
| Case 75 | 3 | 125,435,432 | 145,789,104 | 2 | 1 | 3 | 0 |
| Case 75 | 3 | 145,790,803 | 149,000,201 | 4 | 1 | 5 | 0 |
| Case 75 | 3 | 149,001,335 | 157,283,248 | 5 | 1 | 6 | 0 |
| Case 75 | 3 | 157,288,885 | 158,390,222 | 6 | 1 | 7 | 0 |
| Case 75 | 3 | 158,390,230 | 158,735,943 | 5 | 1 | 6 | 0 |
| Case 75 | 3 | 158,736,714 | 159,298,036 | 6 | 1 | 7 | 0 |
| Case 75 | 3 | 159,302,556 | 159,631,796 | 5 | 1 | 6 | 0 |
| Case 75 | 3 | 159,634,474 | 167,240,215 | 6 | 1 | 7 | 0 |
| Case 75 | 3 | 167,240,938 | 167,750,553 | 5 | 1 | 6 | 0 |
| Case 75 | 3 | 167,754,775 | 169,477,506 | 6 | 1 | 7 | 0 |
| Case 75 | 3 | 169,480,204 | 169,656,274 | 5 | 1 | 6 | 0 |
| Case 75 | 3 | 169,659,270 | 170,166,138 | 6 | 1 | 7 | 0 |
| Case 75 | 3 | 170,171,738 | 170,993,127 | 5 | 1 | 6 | 0 |
| Case 75 | 3 | 170,995,335 | 171,199,203 | 6 | 1 | 7 | 0 |
| Case 75 | 3 | 171,199,970 | 171,599,454 | 5 | 1 | 6 | 0 |
| Case 75 | 3 | 171,606,858 | 171,965,405 | 6 | 1 | 7 | 0 |
| Case 75 | 3 | 171,965,558 | 172,385,693 | 5 | 1 | 6 | 0 |
| Case 75 | 3 | 172,388,096 | 176,638,068 | 6 | 1 | 7 | 0 |
| Case 75 | 3 | 176,639,894 | 191,172,809 | 5 | 1 | 6 | 0 |

|         |   |             |             |   |   |   |   |
|---------|---|-------------|-------------|---|---|---|---|
| Case 75 | 3 | 191,173,649 | 191,416,890 | 6 | 1 | 7 | 0 |
| Case 75 | 3 | 191,423,639 | 197,687,252 | 5 | 1 | 6 | 0 |
| Case 75 | 3 | 197,695,057 | 197,838,262 | 6 | 1 | 7 | 0 |
| Case 75 | 4 | 71,566      | 221,623     | 2 | 2 | 4 | 0 |
| Case 75 | 4 | 225,449     | 437,999     | 2 | 1 | 3 | 0 |
| Case 75 | 4 | 438,030     | 49,620,898  | 2 | 2 | 4 | 0 |
| Case 75 | 4 | 52,697,856  | 87,098,956  | 2 | 2 | 4 | 0 |
| Case 75 | 4 | 87,122,922  | 87,351,740  | 2 | 0 | 2 | 1 |
| Case 75 | 4 | 87,362,834  | 97,476,439  | 2 | 2 | 4 | 0 |
| Case 75 | 4 | 97,489,174  | 97,621,871  | 2 | 1 | 3 | 0 |
| Case 75 | 4 | 97,623,215  | 111,584,419 | 2 | 2 | 4 | 0 |
| Case 75 | 4 | 111,598,749 | 113,189,546 | 2 | 0 | 2 | 1 |
| Case 75 | 4 | 113,195,610 | 113,356,306 | 3 | 0 | 3 | 1 |
| Case 75 | 4 | 113,356,363 | 114,274,329 | 2 | 0 | 2 | 1 |
| Case 75 | 4 | 114,274,518 | 114,294,537 | 3 | 0 | 3 | 1 |
| Case 75 | 4 | 114,295,540 | 114,551,579 | 2 | 0 | 2 | 1 |
| Case 75 | 4 | 114,555,661 | 115,701,304 | 2 | 2 | 4 | 0 |
| Case 75 | 4 | 115,720,115 | 115,813,013 | 3 | 2 | 5 | 0 |
| Case 75 | 4 | 115,823,991 | 132,298,239 | 2 | 2 | 4 | 0 |
| Case 75 | 4 | 132,305,574 | 133,151,211 | 4 | 2 | 6 | 0 |
| Case 75 | 4 | 133,156,160 | 134,872,709 | 3 | 2 | 5 | 0 |
| Case 75 | 4 | 134,888,185 | 134,997,723 | 2 | 0 | 2 | 1 |
| Case 75 | 4 | 135,019,322 | 136,606,270 | 2 | 2 | 4 | 0 |
| Case 75 | 4 | 136,613,685 | 154,376,222 | 3 | 2 | 5 | 0 |
| Case 75 | 4 | 154,378,572 | 154,631,563 | 2 | 0 | 2 | 1 |
| Case 75 | 4 | 154,631,587 | 154,891,356 | 3 | 0 | 3 | 1 |
| Case 75 | 4 | 154,891,741 | 155,154,936 | 2 | 0 | 2 | 1 |
| Case 75 | 4 | 155,155,797 | 155,158,175 | 3 | 0 | 3 | 1 |
| Case 75 | 4 | 155,158,284 | 155,209,141 | 2 | 0 | 2 | 1 |
| Case 75 | 4 | 155,216,371 | 155,219,789 | 3 | 0 | 3 | 1 |
| Case 75 | 4 | 155,219,852 | 155,410,650 | 2 | 0 | 2 | 1 |
| Case 75 | 4 | 155,410,667 | 155,414,923 | 3 | 0 | 3 | 1 |
| Case 75 | 4 | 155,420,487 | 155,510,314 | 2 | 0 | 2 | 1 |
| Case 75 | 4 | 155,511,824 | 155,627,814 | 3 | 0 | 3 | 1 |
| Case 75 | 4 | 155,632,606 | 159,634,297 | 2 | 0 | 2 | 1 |
| Case 75 | 4 | 159,635,244 | 159,877,388 | 3 | 0 | 3 | 1 |
| Case 75 | 4 | 159,881,453 | 160,274,698 | 2 | 0 | 2 | 1 |
| Case 75 | 4 | 160,274,740 | 160,497,236 | 3 | 0 | 3 | 1 |
| Case 75 | 4 | 160,512,123 | 164,383,199 | 2 | 0 | 2 | 1 |
| Case 75 | 4 | 164,384,209 | 164,492,395 | 3 | 0 | 3 | 1 |
| Case 75 | 4 | 164,499,999 | 169,390,717 | 2 | 0 | 2 | 1 |
| Case 75 | 4 | 169,394,314 | 169,439,280 | 3 | 0 | 3 | 1 |
| Case 75 | 4 | 169,439,902 | 169,505,090 | 2 | 0 | 2 | 1 |
| Case 75 | 4 | 169,506,877 | 169,567,817 | 3 | 0 | 3 | 1 |
| Case 75 | 4 | 169,569,729 | 169,592,669 | 2 | 0 | 2 | 1 |
| Case 75 | 4 | 169,595,421 | 169,909,593 | 3 | 0 | 3 | 1 |
| Case 75 | 4 | 169,911,312 | 169,962,604 | 2 | 0 | 2 | 1 |
| Case 75 | 4 | 169,967,051 | 169,992,206 | 3 | 0 | 3 | 1 |
| Case 75 | 4 | 169,992,966 | 170,208,954 | 2 | 0 | 2 | 1 |
| Case 75 | 4 | 170,212,576 | 170,312,589 | 3 | 0 | 3 | 1 |
| Case 75 | 4 | 170,314,951 | 170,740,266 | 2 | 0 | 2 | 1 |
| Case 75 | 4 | 170,754,412 | 170,919,666 | 3 | 0 | 3 | 1 |
| Case 75 | 4 | 170,924,737 | 171,340,897 | 2 | 0 | 2 | 1 |
| Case 75 | 4 | 171,349,115 | 171,418,411 | 3 | 0 | 3 | 1 |
| Case 75 | 4 | 171,420,400 | 173,961,153 | 2 | 0 | 2 | 1 |
| Case 75 | 4 | 173,962,425 | 174,016,641 | 3 | 0 | 3 | 1 |
| Case 75 | 4 | 174,020,403 | 174,401,970 | 2 | 0 | 2 | 1 |
| Case 75 | 4 | 174,425,236 | 174,461,343 | 3 | 0 | 3 | 1 |
| Case 75 | 4 | 174,471,671 | 174,579,326 | 2 | 0 | 2 | 1 |
| Case 75 | 4 | 174,580,179 | 174,655,914 | 3 | 0 | 3 | 1 |
| Case 75 | 4 | 174,657,554 | 178,646,542 | 2 | 0 | 2 | 1 |

|         |   |             |             |   |   |   |   |
|---------|---|-------------|-------------|---|---|---|---|
| Case 75 | 4 | 178,649,091 | 178,683,325 | 3 | 0 | 3 | 1 |
| Case 75 | 4 | 178,686,626 | 181,124,250 | 2 | 0 | 2 | 1 |
| Case 75 | 4 | 181,124,269 | 181,154,351 | 3 | 0 | 3 | 1 |
| Case 75 | 4 | 181,157,746 | 182,416,097 | 2 | 0 | 2 | 1 |
| Case 75 | 4 | 182,420,303 | 182,592,079 | 3 | 0 | 3 | 1 |
| Case 75 | 4 | 182,592,541 | 183,136,858 | 2 | 0 | 2 | 1 |
| Case 75 | 4 | 183,137,216 | 183,391,730 | 3 | 0 | 3 | 1 |
| Case 75 | 4 | 183,396,702 | 183,655,548 | 2 | 0 | 2 | 1 |
| Case 75 | 4 | 183,655,636 | 183,896,828 | 3 | 0 | 3 | 1 |
| Case 75 | 4 | 183,907,715 | 184,180,853 | 2 | 0 | 2 | 1 |
| Case 75 | 4 | 184,182,124 | 184,192,037 | 3 | 0 | 3 | 1 |
| Case 75 | 4 | 184,192,278 | 184,210,670 | 2 | 0 | 2 | 1 |
| Case 75 | 4 | 184,215,675 | 184,335,306 | 3 | 0 | 3 | 1 |
| Case 75 | 4 | 184,338,589 | 184,641,445 | 2 | 0 | 2 | 1 |
| Case 75 | 4 | 184,648,954 | 185,248,266 | 3 | 0 | 3 | 1 |
| Case 75 | 4 | 185,249,147 | 185,262,740 | 2 | 0 | 2 | 1 |
| Case 75 | 4 | 185,263,811 | 185,514,341 | 3 | 0 | 3 | 1 |
| Case 75 | 4 | 185,520,068 | 185,655,171 | 2 | 0 | 2 | 1 |
| Case 75 | 4 | 185,655,214 | 186,012,601 | 3 | 0 | 3 | 1 |
| Case 75 | 4 | 186,013,276 | 186,382,253 | 2 | 0 | 2 | 1 |
| Case 75 | 4 | 186,383,240 | 186,692,629 | 3 | 0 | 3 | 1 |
| Case 75 | 4 | 186,694,576 | 187,077,203 | 2 | 0 | 2 | 1 |
| Case 75 | 4 | 187,077,204 | 187,527,472 | 3 | 0 | 3 | 1 |
| Case 75 | 4 | 187,527,818 | 187,538,330 | 2 | 0 | 2 | 1 |
| Case 75 | 4 | 187,538,942 | 187,549,883 | 3 | 0 | 3 | 1 |
| Case 75 | 4 | 187,549,905 | 187,621,281 | 2 | 0 | 2 | 1 |
| Case 75 | 4 | 187,621,568 | 187,903,476 | 3 | 0 | 3 | 1 |
| Case 75 | 4 | 187,906,366 | 188,899,298 | 2 | 0 | 2 | 1 |
| Case 75 | 4 | 188,904,235 | 189,101,773 | 3 | 0 | 3 | 1 |
| Case 75 | 4 | 189,115,231 | 189,951,379 | 2 | 0 | 2 | 1 |
| Case 75 | 4 | 189,952,149 | 190,065,197 | 3 | 0 | 3 | 1 |
| Case 75 | 4 | 190,066,616 | 190,331,143 | 2 | 0 | 2 | 1 |
| Case 75 | 4 | 190,333,580 | 190,438,606 | 3 | 0 | 3 | 1 |
| Case 75 | 4 | 190,448,383 | 190,742,692 | 2 | 0 | 2 | 1 |
| Case 75 | 4 | 190,745,892 | 190,963,766 | 3 | 0 | 3 | 1 |
| Case 75 | 5 | 38,139      | 409,760     | 3 | 2 | 5 | 0 |
| Case 75 | 5 | 410,980     | 1,013,269   | 3 | 3 | 6 | 0 |
| Case 75 | 5 | 1,015,063   | 1,035,519   | 4 | 2 | 6 | 0 |
| Case 75 | 5 | 1,035,555   | 1,190,088   | 5 | 2 | 7 | 0 |
| Case 75 | 5 | 1,190,440   | 1,190,440   | 3 | 2 | 5 | 0 |
| Case 75 | 5 | 1,191,061   | 1,320,247   | 4 | 2 | 6 | 0 |
| Case 75 | 5 | 1,320,722   | 1,491,009   | 3 | 2 | 5 | 0 |
| Case 75 | 5 | 1,492,559   | 1,730,637   | 3 | 3 | 6 | 0 |
| Case 75 | 5 | 1,734,834   | 1,753,306   | 3 | 2 | 5 | 0 |
| Case 75 | 5 | 1,759,000   | 32,415,321  | 4 | 0 | 4 | 1 |
| Case 75 | 5 | 32,421,850  | 32,733,418  | 5 | 0 | 5 | 1 |
| Case 75 | 5 | 32,733,968  | 46,399,093  | 4 | 0 | 4 | 1 |
| Case 75 | 5 | 49,457,282  | 49,917,122  | 2 | 0 | 2 | 1 |
| Case 75 | 5 | 49,919,338  | 49,988,020  | 3 | 0 | 3 | 1 |
| Case 75 | 5 | 49,991,561  | 52,275,103  | 2 | 0 | 2 | 1 |
| Case 75 | 5 | 52,281,914  | 52,319,076  | 3 | 0 | 3 | 1 |
| Case 75 | 5 | 52,321,039  | 52,698,518  | 2 | 0 | 2 | 1 |
| Case 75 | 5 | 52,716,489  | 52,856,797  | 3 | 0 | 3 | 1 |
| Case 75 | 5 | 52,867,330  | 53,582,605  | 2 | 0 | 2 | 1 |
| Case 75 | 5 | 53,585,870  | 53,906,687  | 3 | 0 | 3 | 1 |
| Case 75 | 5 | 53,912,105  | 54,370,089  | 2 | 0 | 2 | 1 |
| Case 75 | 5 | 54,378,192  | 54,561,643  | 3 | 0 | 3 | 1 |
| Case 75 | 5 | 54,563,027  | 55,147,418  | 2 | 0 | 2 | 1 |
| Case 75 | 5 | 55,147,452  | 55,229,577  | 3 | 0 | 3 | 1 |
| Case 75 | 5 | 55,236,367  | 55,308,631  | 2 | 0 | 2 | 1 |
| Case 75 | 5 | 55,322,895  | 55,484,024  | 3 | 0 | 3 | 1 |

|         |   |            |            |   |   |   |   |
|---------|---|------------|------------|---|---|---|---|
| Case 75 | 5 | 55,488,928 | 55,567,861 | 2 | 0 | 2 | 1 |
| Case 75 | 5 | 55,568,321 | 56,026,843 | 3 | 0 | 3 | 1 |
| Case 75 | 5 | 56,029,717 | 56,727,379 | 2 | 0 | 2 | 1 |
| Case 75 | 5 | 56,727,958 | 56,808,015 | 3 | 0 | 3 | 1 |
| Case 75 | 5 | 56,808,503 | 57,372,815 | 2 | 0 | 2 | 1 |
| Case 75 | 5 | 57,373,820 | 57,495,341 | 3 | 0 | 3 | 1 |
| Case 75 | 5 | 57,496,382 | 58,045,259 | 2 | 0 | 2 | 1 |
| Case 75 | 5 | 58,049,332 | 58,128,813 | 3 | 0 | 3 | 1 |
| Case 75 | 5 | 58,135,616 | 58,172,093 | 2 | 0 | 2 | 1 |
| Case 75 | 5 | 58,172,462 | 58,365,249 | 3 | 0 | 3 | 1 |
| Case 75 | 5 | 58,368,695 | 58,704,650 | 2 | 0 | 2 | 1 |
| Case 75 | 5 | 58,707,111 | 58,715,833 | 3 | 0 | 3 | 1 |
| Case 75 | 5 | 58,719,893 | 60,488,167 | 2 | 0 | 2 | 1 |
| Case 75 | 5 | 60,511,401 | 61,172,759 | 3 | 0 | 3 | 1 |
| Case 75 | 5 | 61,180,703 | 61,199,286 | 2 | 0 | 2 | 1 |
| Case 75 | 5 | 61,200,407 | 61,312,387 | 3 | 0 | 3 | 1 |
| Case 75 | 5 | 61,338,462 | 61,926,784 | 2 | 0 | 2 | 1 |
| Case 75 | 5 | 61,941,043 | 62,027,073 | 3 | 0 | 3 | 1 |
| Case 75 | 5 | 62,029,339 | 63,244,622 | 2 | 0 | 2 | 1 |
| Case 75 | 5 | 63,249,424 | 63,509,746 | 3 | 0 | 3 | 1 |
| Case 75 | 5 | 63,509,839 | 63,901,304 | 2 | 0 | 2 | 1 |
| Case 75 | 5 | 63,905,019 | 63,972,658 | 3 | 0 | 3 | 1 |
| Case 75 | 5 | 63,978,255 | 64,340,029 | 2 | 0 | 2 | 1 |
| Case 75 | 5 | 64,340,353 | 64,483,759 | 3 | 0 | 3 | 1 |
| Case 75 | 5 | 64,484,802 | 65,105,354 | 2 | 0 | 2 | 1 |
| Case 75 | 5 | 65,105,441 | 65,183,502 | 3 | 0 | 3 | 1 |
| Case 75 | 5 | 65,185,421 | 65,349,887 | 2 | 0 | 2 | 1 |
| Case 75 | 5 | 65,349,908 | 65,350,481 | 3 | 0 | 3 | 1 |
| Case 75 | 5 | 65,370,943 | 65,519,426 | 2 | 0 | 2 | 1 |
| Case 75 | 5 | 65,522,888 | 65,759,249 | 3 | 0 | 3 | 1 |
| Case 75 | 5 | 65,768,007 | 66,241,285 | 2 | 0 | 2 | 1 |
| Case 75 | 5 | 66,250,384 | 66,288,624 | 3 | 0 | 3 | 1 |
| Case 75 | 5 | 66,293,644 | 66,478,392 | 2 | 0 | 2 | 1 |
| Case 75 | 5 | 66,478,626 | 66,480,154 | 3 | 0 | 3 | 1 |
| Case 75 | 5 | 66,480,297 | 66,985,073 | 2 | 0 | 2 | 1 |
| Case 75 | 5 | 66,988,373 | 67,386,576 | 3 | 0 | 3 | 1 |
| Case 75 | 5 | 67,387,273 | 67,484,617 | 2 | 0 | 2 | 1 |
| Case 75 | 5 | 67,487,328 | 67,777,856 | 3 | 0 | 3 | 1 |
| Case 75 | 5 | 67,779,809 | 68,003,457 | 2 | 0 | 2 | 1 |
| Case 75 | 5 | 68,003,493 | 68,337,426 | 3 | 0 | 3 | 1 |
| Case 75 | 5 | 68,342,235 | 68,417,704 | 2 | 0 | 2 | 1 |
| Case 75 | 5 | 68,417,755 | 68,565,120 | 3 | 0 | 3 | 1 |
| Case 75 | 5 | 68,568,858 | 68,709,884 | 2 | 0 | 2 | 1 |
| Case 75 | 5 | 68,715,249 | 68,728,353 | 3 | 0 | 3 | 1 |
| Case 75 | 5 | 68,740,653 | 68,805,114 | 2 | 0 | 2 | 1 |
| Case 75 | 5 | 68,805,249 | 70,709,459 | 3 | 0 | 3 | 1 |
| Case 75 | 5 | 70,746,762 | 70,889,870 | 2 | 0 | 2 | 1 |
| Case 75 | 5 | 70,895,499 | 71,394,115 | 3 | 0 | 3 | 1 |
| Case 75 | 5 | 71,394,869 | 71,472,020 | 2 | 0 | 2 | 1 |
| Case 75 | 5 | 71,474,274 | 71,496,159 | 3 | 0 | 3 | 1 |
| Case 75 | 5 | 71,496,419 | 71,609,959 | 2 | 0 | 2 | 1 |
| Case 75 | 5 | 71,615,249 | 71,930,656 | 3 | 0 | 3 | 1 |
| Case 75 | 5 | 71,954,583 | 72,407,538 | 2 | 0 | 2 | 1 |
| Case 75 | 5 | 72,408,246 | 72,861,455 | 3 | 0 | 3 | 1 |
| Case 75 | 5 | 72,862,289 | 73,098,324 | 2 | 0 | 2 | 1 |
| Case 75 | 5 | 73,099,158 | 73,144,010 | 3 | 0 | 3 | 1 |
| Case 75 | 5 | 73,144,829 | 73,187,660 | 2 | 0 | 2 | 1 |
| Case 75 | 5 | 73,188,022 | 73,198,364 | 3 | 0 | 3 | 1 |
| Case 75 | 5 | 73,201,991 | 73,222,133 | 2 | 0 | 2 | 1 |
| Case 75 | 5 | 73,222,351 | 73,954,619 | 3 | 0 | 3 | 1 |
| Case 75 | 5 | 73,955,280 | 74,239,864 | 2 | 0 | 2 | 1 |

|         |   |             |             |   |   |   |   |
|---------|---|-------------|-------------|---|---|---|---|
| Case 75 | 5 | 74,239,946  | 74,269,724  | 3 | 0 | 3 | 1 |
| Case 75 | 5 | 74,274,675  | 74,322,982  | 2 | 0 | 2 | 1 |
| Case 75 | 5 | 74,324,437  | 74,371,635  | 3 | 0 | 3 | 1 |
| Case 75 | 5 | 74,376,571  | 75,014,916  | 2 | 0 | 2 | 1 |
| Case 75 | 5 | 75,015,242  | 75,866,423  | 3 | 0 | 3 | 1 |
| Case 75 | 5 | 75,869,228  | 75,913,844  | 2 | 0 | 2 | 1 |
| Case 75 | 5 | 75,913,853  | 75,917,720  | 3 | 0 | 3 | 1 |
| Case 75 | 5 | 75,918,738  | 76,016,946  | 2 | 0 | 2 | 1 |
| Case 75 | 5 | 76,019,044  | 76,326,719  | 3 | 0 | 3 | 1 |
| Case 75 | 5 | 76,331,387  | 76,417,042  | 2 | 0 | 2 | 1 |
| Case 75 | 5 | 76,418,218  | 76,555,245  | 3 | 0 | 3 | 1 |
| Case 75 | 5 | 76,562,245  | 76,638,632  | 2 | 0 | 2 | 1 |
| Case 75 | 5 | 76,642,311  | 76,724,599  | 3 | 0 | 3 | 1 |
| Case 75 | 5 | 76,725,582  | 76,903,692  | 2 | 0 | 2 | 1 |
| Case 75 | 5 | 76,904,032  | 76,967,446  | 3 | 0 | 3 | 1 |
| Case 75 | 5 | 76,973,108  | 77,134,589  | 2 | 0 | 2 | 1 |
| Case 75 | 5 | 77,140,099  | 77,289,748  | 3 | 0 | 3 | 1 |
| Case 75 | 5 | 77,290,512  | 77,579,205  | 2 | 0 | 2 | 1 |
| Case 75 | 5 | 77,582,571  | 77,669,593  | 3 | 0 | 3 | 1 |
| Case 75 | 5 | 77,670,793  | 77,784,433  | 2 | 0 | 2 | 1 |
| Case 75 | 5 | 77,784,438  | 78,268,889  | 3 | 0 | 3 | 1 |
| Case 75 | 5 | 78,272,540  | 78,321,109  | 2 | 0 | 2 | 1 |
| Case 75 | 5 | 78,322,282  | 78,379,069  | 3 | 0 | 3 | 1 |
| Case 75 | 5 | 78,379,449  | 78,596,580  | 2 | 0 | 2 | 1 |
| Case 75 | 5 | 78,599,519  | 78,849,697  | 3 | 0 | 3 | 1 |
| Case 75 | 5 | 78,852,686  | 79,017,377  | 2 | 0 | 2 | 1 |
| Case 75 | 5 | 79,024,734  | 79,030,212  | 3 | 0 | 3 | 1 |
| Case 75 | 5 | 79,030,258  | 79,033,667  | 2 | 0 | 2 | 1 |
| Case 75 | 5 | 79,034,027  | 79,279,578  | 3 | 0 | 3 | 1 |
| Case 75 | 5 | 79,281,467  | 79,329,756  | 2 | 0 | 2 | 1 |
| Case 75 | 5 | 79,330,559  | 79,549,684  | 3 | 0 | 3 | 1 |
| Case 75 | 5 | 79,564,658  | 79,854,586  | 2 | 0 | 2 | 1 |
| Case 75 | 5 | 79,854,617  | 80,008,704  | 3 | 0 | 3 | 1 |
| Case 75 | 5 | 80,012,251  | 80,203,678  | 2 | 0 | 2 | 1 |
| Case 75 | 5 | 80,206,473  | 80,554,946  | 3 | 0 | 3 | 1 |
| Case 75 | 5 | 80,555,065  | 80,639,678  | 2 | 0 | 2 | 1 |
| Case 75 | 5 | 80,640,000  | 80,655,266  | 3 | 0 | 3 | 1 |
| Case 75 | 5 | 80,655,709  | 81,049,187  | 2 | 0 | 2 | 1 |
| Case 75 | 5 | 81,053,445  | 81,220,187  | 3 | 0 | 3 | 1 |
| Case 75 | 5 | 81,221,223  | 82,068,106  | 2 | 0 | 2 | 1 |
| Case 75 | 5 | 82,070,143  | 82,171,190  | 3 | 0 | 3 | 1 |
| Case 75 | 5 | 82,171,406  | 82,297,362  | 2 | 0 | 2 | 1 |
| Case 75 | 5 | 82,299,073  | 82,377,566  | 3 | 0 | 3 | 1 |
| Case 75 | 5 | 82,381,400  | 82,833,891  | 2 | 0 | 2 | 1 |
| Case 75 | 5 | 82,833,977  | 82,841,476  | 3 | 0 | 3 | 1 |
| Case 75 | 5 | 82,843,864  | 94,353,137  | 2 | 0 | 2 | 1 |
| Case 75 | 5 | 94,353,905  | 94,415,012  | 3 | 0 | 3 | 1 |
| Case 75 | 5 | 94,417,521  | 95,605,114  | 2 | 0 | 2 | 1 |
| Case 75 | 5 | 95,610,520  | 96,094,694  | 3 | 0 | 3 | 1 |
| Case 75 | 5 | 96,094,973  | 96,122,210  | 2 | 0 | 2 | 1 |
| Case 75 | 5 | 96,124,300  | 96,174,929  | 3 | 0 | 3 | 1 |
| Case 75 | 5 | 96,175,043  | 97,438,982  | 2 | 0 | 2 | 1 |
| Case 75 | 5 | 97,440,934  | 97,479,660  | 3 | 0 | 3 | 1 |
| Case 75 | 5 | 97,483,701  | 106,674,516 | 2 | 0 | 2 | 1 |
| Case 75 | 5 | 106,677,407 | 106,738,959 | 3 | 0 | 3 | 1 |
| Case 75 | 5 | 106,739,110 | 108,521,939 | 2 | 0 | 2 | 1 |
| Case 75 | 5 | 108,534,661 | 108,589,326 | 3 | 0 | 3 | 1 |
| Case 75 | 5 | 108,591,279 | 109,368,613 | 2 | 0 | 2 | 1 |
| Case 75 | 5 | 109,369,796 | 109,401,411 | 3 | 0 | 3 | 1 |
| Case 75 | 5 | 109,401,940 | 110,814,116 | 2 | 0 | 2 | 1 |
| Case 75 | 5 | 110,815,311 | 110,991,602 | 3 | 0 | 3 | 1 |

|         |   |             |             |   |   |   |   |
|---------|---|-------------|-------------|---|---|---|---|
| Case 75 | 5 | 110,992,525 | 111,681,843 | 2 | 0 | 2 | 1 |
| Case 75 | 5 | 111,682,654 | 112,007,180 | 3 | 0 | 3 | 1 |
| Case 75 | 5 | 112,008,440 | 112,175,528 | 2 | 0 | 2 | 1 |
| Case 75 | 5 | 112,175,540 | 112,198,276 | 3 | 0 | 3 | 1 |
| Case 75 | 5 | 112,200,359 | 112,361,757 | 2 | 0 | 2 | 1 |
| Case 75 | 5 | 112,362,840 | 112,393,483 | 3 | 0 | 3 | 1 |
| Case 75 | 5 | 112,394,380 | 112,439,993 | 2 | 0 | 2 | 1 |
| Case 75 | 5 | 112,440,142 | 112,495,421 | 3 | 0 | 3 | 1 |
| Case 75 | 5 | 112,496,354 | 112,530,947 | 2 | 0 | 2 | 1 |
| Case 75 | 5 | 112,532,935 | 112,641,650 | 3 | 0 | 3 | 1 |
| Case 75 | 5 | 112,655,413 | 112,735,231 | 2 | 0 | 2 | 1 |
| Case 75 | 5 | 112,739,017 | 112,825,677 | 3 | 0 | 3 | 1 |
| Case 75 | 5 | 112,829,305 | 113,340,036 | 2 | 0 | 2 | 1 |
| Case 75 | 5 | 113,342,732 | 113,402,762 | 3 | 0 | 3 | 1 |
| Case 75 | 5 | 113,403,389 | 113,849,294 | 2 | 0 | 2 | 1 |
| Case 75 | 5 | 113,854,743 | 114,452,634 | 3 | 0 | 3 | 1 |
| Case 75 | 5 | 114,459,958 | 114,709,028 | 2 | 0 | 2 | 1 |
| Case 75 | 5 | 114,710,653 | 114,912,363 | 3 | 0 | 3 | 1 |
| Case 75 | 5 | 114,915,460 | 115,309,222 | 2 | 0 | 2 | 1 |
| Case 75 | 5 | 115,310,760 | 115,336,215 | 3 | 0 | 3 | 1 |
| Case 75 | 5 | 115,336,353 | 115,704,566 | 2 | 0 | 2 | 1 |
| Case 75 | 5 | 115,707,457 | 116,064,934 | 3 | 0 | 3 | 1 |
| Case 75 | 5 | 116,066,910 | 117,823,265 | 2 | 0 | 2 | 1 |
| Case 75 | 5 | 117,823,346 | 117,869,174 | 3 | 0 | 3 | 1 |
| Case 75 | 5 | 117,884,604 | 118,071,881 | 2 | 0 | 2 | 1 |
| Case 75 | 5 | 118,073,157 | 118,134,414 | 3 | 0 | 3 | 1 |
| Case 75 | 5 | 118,145,507 | 118,624,190 | 2 | 0 | 2 | 1 |
| Case 75 | 5 | 118,624,941 | 118,676,529 | 3 | 0 | 3 | 1 |
| Case 75 | 5 | 118,677,093 | 118,931,912 | 2 | 0 | 2 | 1 |
| Case 75 | 5 | 118,942,612 | 119,093,698 | 3 | 0 | 3 | 1 |
| Case 75 | 5 | 119,100,616 | 119,270,840 | 2 | 0 | 2 | 1 |
| Case 75 | 5 | 119,276,292 | 119,413,039 | 3 | 0 | 3 | 1 |
| Case 75 | 5 | 119,413,303 | 121,480,802 | 2 | 0 | 2 | 1 |
| Case 75 | 5 | 121,487,765 | 121,497,094 | 3 | 0 | 3 | 1 |
| Case 75 | 5 | 121,497,706 | 121,707,541 | 2 | 0 | 2 | 1 |
| Case 75 | 5 | 121,726,123 | 122,132,725 | 3 | 0 | 3 | 1 |
| Case 75 | 5 | 122,135,429 | 122,402,675 | 2 | 0 | 2 | 1 |
| Case 75 | 5 | 122,405,090 | 122,682,368 | 3 | 0 | 3 | 1 |
| Case 75 | 5 | 122,685,717 | 123,596,603 | 2 | 0 | 2 | 1 |
| Case 75 | 5 | 123,599,714 | 123,690,883 | 3 | 0 | 3 | 1 |
| Case 75 | 5 | 123,691,444 | 123,779,300 | 2 | 0 | 2 | 1 |
| Case 75 | 5 | 123,782,602 | 123,918,548 | 3 | 0 | 3 | 1 |
| Case 75 | 5 | 123,919,181 | 123,959,513 | 2 | 0 | 2 | 1 |
| Case 75 | 5 | 123,960,447 | 124,177,701 | 3 | 0 | 3 | 1 |
| Case 75 | 5 | 124,179,292 | 124,875,058 | 2 | 0 | 2 | 1 |
| Case 75 | 5 | 124,877,035 | 124,914,520 | 3 | 0 | 3 | 1 |
| Case 75 | 5 | 124,916,977 | 125,734,100 | 2 | 0 | 2 | 1 |
| Case 75 | 5 | 125,738,273 | 126,814,254 | 3 | 0 | 3 | 1 |
| Case 75 | 5 | 126,817,110 | 127,218,995 | 2 | 0 | 2 | 1 |
| Case 75 | 5 | 127,219,305 | 127,437,401 | 3 | 0 | 3 | 1 |
| Case 75 | 5 | 127,448,519 | 127,557,814 | 2 | 0 | 2 | 1 |
| Case 75 | 5 | 127,562,880 | 127,599,184 | 3 | 0 | 3 | 1 |
| Case 75 | 5 | 127,609,633 | 128,291,364 | 2 | 0 | 2 | 1 |
| Case 75 | 5 | 128,298,437 | 128,302,288 | 3 | 0 | 3 | 1 |
| Case 75 | 5 | 128,302,850 | 131,289,879 | 2 | 0 | 2 | 1 |
| Case 75 | 5 | 131,294,966 | 131,669,264 | 3 | 0 | 3 | 1 |
| Case 75 | 5 | 131,670,178 | 131,704,980 | 2 | 0 | 2 | 1 |
| Case 75 | 5 | 131,705,627 | 131,875,930 | 3 | 0 | 3 | 1 |
| Case 75 | 5 | 131,877,699 | 131,986,463 | 2 | 0 | 2 | 1 |
| Case 75 | 5 | 131,992,409 | 132,008,644 | 3 | 0 | 3 | 1 |
| Case 75 | 5 | 132,009,154 | 132,042,146 | 2 | 0 | 2 | 1 |



|         |   |             |             |   |   |   |   |
|---------|---|-------------|-------------|---|---|---|---|
| Case 75 | 5 | 132,043,032 | 132,103,271 | 3 | 0 | 3 | 1 |
| Case 75 | 5 | 132,109,742 | 132,159,588 | 2 | 0 | 2 | 1 |
| Case 75 | 5 | 132,159,594 | 132,944,069 | 3 | 0 | 3 | 1 |
| Case 75 | 5 | 132,949,899 | 133,003,070 | 2 | 0 | 2 | 1 |
| Case 75 | 5 | 133,005,912 | 133,451,683 | 3 | 0 | 3 | 1 |
| Case 75 | 5 | 133,473,697 | 133,730,455 | 2 | 0 | 2 | 1 |
| Case 75 | 5 | 133,741,881 | 133,930,528 | 3 | 0 | 3 | 1 |
| Case 75 | 5 | 133,942,478 | 134,063,041 | 2 | 0 | 2 | 1 |
| Case 75 | 5 | 134,074,481 | 135,228,165 | 3 | 0 | 3 | 1 |
| Case 75 | 5 | 135,229,738 | 135,283,122 | 2 | 0 | 2 | 1 |
| Case 75 | 5 | 135,286,437 | 135,896,392 | 3 | 0 | 3 | 1 |
| Case 75 | 5 | 135,916,094 | 136,314,013 | 2 | 0 | 2 | 1 |
| Case 75 | 5 | 136,314,511 | 137,086,605 | 3 | 0 | 3 | 1 |
| Case 75 | 5 | 137,088,234 | 137,465,138 | 2 | 0 | 2 | 1 |
| Case 75 | 5 | 137,474,417 | 139,684,364 | 3 | 0 | 3 | 1 |
| Case 75 | 5 | 139,695,230 | 139,931,384 | 4 | 0 | 4 | 1 |
| Case 75 | 5 | 139,931,607 | 139,931,620 | 2 | 0 | 2 | 1 |
| Case 75 | 5 | 139,931,629 | 139,931,644 | 1 | 0 | 1 | 0 |
| Case 75 | 5 | 139,931,646 | 139,931,653 | 2 | 0 | 2 | 1 |
| Case 75 | 5 | 139,931,655 | 139,931,740 | 3 | 0 | 3 | 1 |
| Case 75 | 5 | 139,936,760 | 140,183,237 | 4 | 0 | 4 | 1 |
| Case 75 | 5 | 140,183,823 | 140,185,473 | 2 | 0 | 2 | 1 |
| Case 75 | 5 | 140,186,844 | 140,308,620 | 3 | 0 | 3 | 1 |
| Case 75 | 5 | 140,308,664 | 140,347,053 | 2 | 0 | 2 | 1 |
| Case 75 | 5 | 140,347,398 | 140,683,320 | 3 | 0 | 3 | 1 |
| Case 75 | 5 | 140,688,728 | 140,711,120 | 2 | 0 | 2 | 1 |
| Case 75 | 5 | 140,711,595 | 140,812,748 | 3 | 0 | 3 | 1 |
| Case 75 | 5 | 140,815,348 | 140,853,856 | 2 | 0 | 2 | 1 |
| Case 75 | 5 | 140,855,329 | 141,343,853 | 3 | 0 | 3 | 1 |
| Case 75 | 5 | 141,344,123 | 141,381,616 | 2 | 0 | 2 | 1 |
| Case 75 | 5 | 141,382,584 | 141,487,203 | 3 | 0 | 3 | 1 |
| Case 75 | 5 | 141,487,530 | 141,536,812 | 2 | 0 | 2 | 1 |
| Case 75 | 5 | 141,540,017 | 142,611,567 | 3 | 0 | 3 | 1 |
| Case 75 | 5 | 142,612,488 | 142,809,272 | 2 | 0 | 2 | 1 |
| Case 75 | 5 | 142,814,865 | 143,200,053 | 3 | 0 | 3 | 1 |
| Case 75 | 5 | 143,200,066 | 143,545,150 | 2 | 0 | 2 | 1 |
| Case 75 | 5 | 143,549,496 | 143,621,838 | 3 | 0 | 3 | 1 |
| Case 75 | 5 | 143,644,780 | 144,861,632 | 2 | 0 | 2 | 1 |
| Case 75 | 5 | 144,868,408 | 145,509,728 | 3 | 0 | 3 | 1 |
| Case 75 | 5 | 145,515,379 | 145,677,418 | 2 | 0 | 2 | 1 |
| Case 75 | 5 | 145,701,961 | 145,857,166 | 3 | 0 | 3 | 1 |
| Case 75 | 5 | 145,873,365 | 145,894,896 | 2 | 0 | 2 | 1 |
| Case 75 | 5 | 145,894,946 | 146,487,497 | 3 | 0 | 3 | 1 |
| Case 75 | 5 | 146,492,274 | 146,743,222 | 2 | 0 | 2 | 1 |
| Case 75 | 5 | 146,750,233 | 147,061,995 | 3 | 0 | 3 | 1 |
| Case 75 | 5 | 147,063,674 | 147,298,865 | 2 | 0 | 2 | 1 |
| Case 75 | 5 | 147,302,214 | 147,341,549 | 3 | 0 | 3 | 1 |
| Case 75 | 5 | 147,345,190 | 147,805,120 | 2 | 0 | 2 | 1 |
| Case 75 | 5 | 147,805,208 | 147,936,120 | 3 | 0 | 3 | 1 |
| Case 75 | 5 | 147,940,042 | 148,172,689 | 2 | 0 | 2 | 1 |
| Case 75 | 5 | 148,172,928 | 148,868,169 | 3 | 0 | 3 | 1 |
| Case 75 | 5 | 148,869,227 | 148,980,714 | 2 | 0 | 2 | 1 |
| Case 75 | 5 | 148,981,046 | 149,076,956 | 3 | 0 | 3 | 1 |
| Case 75 | 5 | 149,082,092 | 149,119,815 | 2 | 0 | 2 | 1 |
| Case 75 | 5 | 149,124,228 | 149,274,769 | 3 | 0 | 3 | 1 |
| Case 75 | 5 | 149,275,993 | 149,323,955 | 2 | 0 | 2 | 1 |
| Case 75 | 5 | 149,324,041 | 149,432,863 | 3 | 0 | 3 | 1 |
| Case 75 | 5 | 149,433,752 | 149,435,759 | 2 | 0 | 2 | 1 |
| Case 75 | 5 | 149,436,930 | 149,677,782 | 3 | 0 | 3 | 1 |
| Case 75 | 5 | 149,677,807 | 149,755,751 | 2 | 0 | 2 | 1 |
| Case 75 | 5 | 149,755,839 | 150,254,620 | 3 | 0 | 3 | 1 |

|         |   |             |             |   |   |   |   |
|---------|---|-------------|-------------|---|---|---|---|
| Case 75 | 5 | 150,257,616 | 150,328,866 | 2 | 0 | 2 | 1 |
| Case 75 | 5 | 150,331,600 | 151,351,067 | 3 | 0 | 3 | 1 |
| Case 75 | 5 | 151,352,448 | 151,500,945 | 2 | 0 | 2 | 1 |
| Case 75 | 5 | 151,503,347 | 151,775,137 | 3 | 0 | 3 | 1 |
| Case 75 | 5 | 151,775,141 | 151,902,834 | 2 | 0 | 2 | 1 |
| Case 75 | 5 | 151,903,277 | 152,117,400 | 3 | 0 | 3 | 1 |
| Case 75 | 5 | 152,130,453 | 152,789,621 | 2 | 0 | 2 | 1 |
| Case 75 | 5 | 152,789,711 | 153,277,759 | 3 | 0 | 3 | 1 |
| Case 75 | 5 | 153,281,406 | 153,432,986 | 2 | 0 | 2 | 1 |
| Case 75 | 5 | 153,433,115 | 154,214,473 | 3 | 0 | 3 | 1 |
| Case 75 | 5 | 154,224,311 | 154,384,725 | 2 | 0 | 2 | 1 |
| Case 75 | 5 | 154,385,429 | 154,806,830 | 3 | 0 | 3 | 1 |
| Case 75 | 5 | 154,809,183 | 155,273,228 | 2 | 0 | 2 | 1 |
| Case 75 | 5 | 155,274,700 | 155,427,558 | 3 | 0 | 3 | 1 |
| Case 75 | 5 | 155,440,966 | 155,784,983 | 2 | 0 | 2 | 1 |
| Case 75 | 5 | 155,789,169 | 156,155,832 | 3 | 0 | 3 | 1 |
| Case 75 | 5 | 156,158,356 | 156,283,415 | 2 | 0 | 2 | 1 |
| Case 75 | 5 | 156,295,198 | 156,809,248 | 3 | 0 | 3 | 1 |
| Case 75 | 5 | 156,810,072 | 156,890,174 | 2 | 0 | 2 | 1 |
| Case 75 | 5 | 156,890,181 | 157,069,796 | 3 | 0 | 3 | 1 |
| Case 75 | 5 | 157,070,998 | 157,154,518 | 2 | 0 | 2 | 1 |
| Case 75 | 5 | 157,158,372 | 157,201,700 | 3 | 0 | 3 | 1 |
| Case 75 | 5 | 157,207,502 | 157,317,932 | 2 | 0 | 2 | 1 |
| Case 75 | 5 | 157,318,560 | 157,615,710 | 3 | 0 | 3 | 1 |
| Case 75 | 5 | 157,625,299 | 157,773,645 | 2 | 0 | 2 | 1 |
| Case 75 | 5 | 157,788,342 | 157,914,654 | 3 | 0 | 3 | 1 |
| Case 75 | 5 | 157,917,275 | 158,114,288 | 2 | 0 | 2 | 1 |
| Case 75 | 5 | 158,115,878 | 158,273,665 | 3 | 0 | 3 | 1 |
| Case 75 | 5 | 158,274,071 | 158,711,219 | 2 | 0 | 2 | 1 |
| Case 75 | 5 | 158,715,663 | 159,463,719 | 3 | 0 | 3 | 1 |
| Case 75 | 5 | 159,466,751 | 159,619,826 | 2 | 0 | 2 | 1 |
| Case 75 | 5 | 159,622,419 | 159,789,092 | 3 | 0 | 3 | 1 |
| Case 75 | 5 | 159,791,206 | 159,843,996 | 2 | 0 | 2 | 1 |
| Case 75 | 5 | 159,844,275 | 160,219,464 | 3 | 0 | 3 | 1 |
| Case 75 | 5 | 160,219,844 | 160,318,038 | 2 | 0 | 2 | 1 |
| Case 75 | 5 | 160,318,988 | 160,505,992 | 3 | 0 | 3 | 1 |
| Case 75 | 5 | 160,506,084 | 161,077,036 | 2 | 0 | 2 | 1 |
| Case 75 | 5 | 161,092,768 | 161,172,541 | 3 | 0 | 3 | 1 |
| Case 75 | 5 | 161,176,573 | 162,748,604 | 2 | 0 | 2 | 1 |
| Case 75 | 5 | 162,750,370 | 162,779,115 | 3 | 0 | 3 | 1 |
| Case 75 | 5 | 162,796,184 | 163,072,880 | 2 | 0 | 2 | 1 |
| Case 75 | 5 | 163,082,728 | 163,290,591 | 0 | 0 | 0 | 0 |
| Case 75 | 5 | 163,306,841 | 166,496,034 | 2 | 0 | 2 | 1 |
| Case 75 | 5 | 166,509,116 | 166,713,726 | 3 | 0 | 3 | 1 |
| Case 75 | 5 | 166,716,981 | 167,070,649 | 2 | 0 | 2 | 1 |
| Case 75 | 5 | 167,075,842 | 167,922,442 | 3 | 0 | 3 | 1 |
| Case 75 | 5 | 167,924,260 | 168,082,455 | 2 | 0 | 2 | 1 |
| Case 75 | 5 | 168,083,311 | 168,816,501 | 3 | 0 | 3 | 1 |
| Case 75 | 5 | 168,819,011 | 169,028,316 | 2 | 0 | 2 | 1 |
| Case 75 | 5 | 169,028,346 | 169,192,074 | 3 | 0 | 3 | 1 |
| Case 75 | 5 | 169,192,826 | 169,239,816 | 2 | 0 | 2 | 1 |
| Case 75 | 5 | 169,242,458 | 170,104,598 | 3 | 0 | 3 | 1 |
| Case 75 | 5 | 170,115,523 | 170,239,112 | 4 | 0 | 4 | 1 |
| Case 75 | 5 | 170,240,423 | 170,279,080 | 3 | 0 | 3 | 1 |
| Case 75 | 5 | 170,282,686 | 170,692,913 | 2 | 0 | 2 | 1 |
| Case 75 | 5 | 170,703,078 | 171,623,828 | 3 | 0 | 3 | 1 |
| Case 75 | 5 | 171,626,110 | 171,756,937 | 2 | 0 | 2 | 1 |
| Case 75 | 5 | 171,762,100 | 172,402,686 | 3 | 0 | 3 | 1 |
| Case 75 | 5 | 172,403,528 | 172,568,979 | 2 | 0 | 2 | 1 |
| Case 75 | 5 | 172,570,220 | 172,679,377 | 3 | 0 | 3 | 1 |
| Case 75 | 5 | 172,680,870 | 172,717,383 | 2 | 0 | 2 | 1 |

|         |   |             |             |   |   |   |   |
|---------|---|-------------|-------------|---|---|---|---|
| Case 75 | 5 | 172,719,020 | 173,334,792 | 3 | 0 | 3 | 1 |
| Case 75 | 5 | 173,339,222 | 173,406,806 | 2 | 0 | 2 | 1 |
| Case 75 | 5 | 173,409,953 | 173,880,643 | 3 | 0 | 3 | 1 |
| Case 75 | 5 | 173,885,707 | 173,935,749 | 2 | 0 | 2 | 1 |
| Case 75 | 5 | 173,938,767 | 174,051,117 | 3 | 0 | 3 | 1 |
| Case 75 | 5 | 174,052,037 | 174,130,513 | 2 | 0 | 2 | 1 |
| Case 75 | 5 | 174,132,754 | 174,429,085 | 3 | 0 | 3 | 1 |
| Case 75 | 5 | 174,429,248 | 174,854,625 | 2 | 0 | 2 | 1 |
| Case 75 | 5 | 174,855,149 | 174,891,621 | 3 | 0 | 3 | 1 |
| Case 75 | 5 | 174,892,501 | 174,990,352 | 2 | 0 | 2 | 1 |
| Case 75 | 5 | 174,998,993 | 176,330,236 | 3 | 0 | 3 | 1 |
| Case 75 | 5 | 176,331,832 | 176,475,355 | 2 | 0 | 2 | 1 |
| Case 75 | 5 | 176,477,835 | 176,734,179 | 3 | 0 | 3 | 1 |
| Case 75 | 5 | 176,734,647 | 176,738,464 | 2 | 0 | 2 | 1 |
| Case 75 | 5 | 176,740,244 | 178,099,758 | 3 | 0 | 3 | 1 |
| Case 75 | 5 | 178,100,927 | 178,140,536 | 2 | 0 | 2 | 1 |
| Case 75 | 5 | 178,140,619 | 178,246,618 | 3 | 0 | 3 | 1 |
| Case 75 | 5 | 178,252,366 | 178,405,729 | 2 | 0 | 2 | 1 |
| Case 75 | 5 | 178,406,388 | 178,455,114 | 3 | 0 | 3 | 1 |
| Case 75 | 5 | 178,455,198 | 178,507,270 | 2 | 0 | 2 | 1 |
| Case 75 | 5 | 178,510,048 | 178,623,396 | 3 | 0 | 3 | 1 |
| Case 75 | 5 | 178,624,101 | 178,637,124 | 2 | 0 | 2 | 1 |
| Case 75 | 5 | 178,640,760 | 178,818,076 | 3 | 0 | 3 | 1 |
| Case 75 | 5 | 178,820,635 | 178,901,458 | 2 | 0 | 2 | 1 |
| Case 75 | 5 | 178,903,149 | 178,990,305 | 3 | 0 | 3 | 1 |
| Case 75 | 5 | 178,991,794 | 179,049,329 | 2 | 0 | 2 | 1 |
| Case 75 | 5 | 179,050,188 | 179,663,409 | 3 | 0 | 3 | 1 |
| Case 75 | 5 | 179,663,458 | 179,748,631 | 2 | 0 | 2 | 1 |
| Case 75 | 5 | 179,751,111 | 179,827,609 | 3 | 0 | 3 | 1 |
| Case 75 | 5 | 179,828,925 | 179,998,326 | 2 | 0 | 2 | 1 |
| Case 75 | 5 | 180,001,061 | 180,039,606 | 3 | 0 | 3 | 1 |
| Case 75 | 5 | 180,040,918 | 180,053,021 | 2 | 0 | 2 | 1 |
| Case 75 | 5 | 180,053,236 | 180,693,127 | 3 | 0 | 3 | 1 |
| Case 75 | 6 | 108,666     | 1,735,174   | 3 | 2 | 5 | 0 |
| Case 75 | 6 | 1,742,513   | 1,786,340   | 2 | 2 | 4 | 0 |
| Case 75 | 6 | 1,792,608   | 2,097,686   | 2 | 0 | 2 | 1 |
| Case 75 | 6 | 2,106,309   | 2,139,450   | 2 | 2 | 4 | 0 |
| Case 75 | 6 | 2,145,136   | 4,680,130   | 3 | 2 | 5 | 0 |
| Case 75 | 6 | 4,682,543   | 5,006,839   | 4 | 2 | 6 | 0 |
| Case 75 | 6 | 5,017,118   | 5,665,387   | 3 | 2 | 5 | 0 |
| Case 75 | 6 | 5,666,064   | 6,012,391   | 4 | 2 | 6 | 0 |
| Case 75 | 6 | 6,013,003   | 8,071,562   | 3 | 2 | 5 | 0 |
| Case 75 | 6 | 8,073,368   | 9,472,085   | 4 | 2 | 6 | 0 |
| Case 75 | 6 | 9,479,015   | 10,177,613  | 3 | 2 | 5 | 0 |
| Case 75 | 6 | 10,178,094  | 10,365,025  | 4 | 2 | 6 | 0 |
| Case 75 | 6 | 10,368,708  | 17,115,648  | 3 | 2 | 5 | 0 |
| Case 75 | 6 | 17,122,836  | 17,614,952  | 4 | 2 | 6 | 0 |
| Case 75 | 6 | 17,616,256  | 19,195,308  | 3 | 2 | 5 | 0 |
| Case 75 | 6 | 19,203,108  | 19,538,647  | 4 | 2 | 6 | 0 |
| Case 75 | 6 | 19,548,810  | 22,440,215  | 3 | 2 | 5 | 0 |
| Case 75 | 6 | 22,441,270  | 23,320,045  | 4 | 2 | 6 | 0 |
| Case 75 | 6 | 23,320,162  | 23,785,834  | 3 | 2 | 5 | 0 |
| Case 75 | 6 | 23,790,115  | 24,098,627  | 4 | 2 | 6 | 0 |
| Case 75 | 6 | 24,100,190  | 28,158,954  | 3 | 2 | 5 | 0 |
| Case 75 | 6 | 28,165,099  | 28,189,389  | 4 | 2 | 6 | 0 |
| Case 75 | 6 | 28,191,057  | 28,969,148  | 3 | 2 | 5 | 0 |
| Case 75 | 6 | 28,969,522  | 29,047,203  | 4 | 2 | 6 | 0 |
| Case 75 | 6 | 29,050,714  | 29,344,704  | 3 | 2 | 5 | 0 |
| Case 75 | 6 | 29,344,939  | 29,364,508  | 4 | 2 | 6 | 0 |
| Case 75 | 6 | 29,364,555  | 29,802,321  | 3 | 2 | 5 | 0 |
| Case 75 | 6 | 29,804,165  | 29,855,978  | 4 | 2 | 6 | 0 |

|         |   |             |             |   |   |   |   |
|---------|---|-------------|-------------|---|---|---|---|
| Case 75 | 6 | 29,864,497  | 29,937,242  | 4 | 1 | 5 | 0 |
| Case 75 | 6 | 29,937,580  | 29,940,260  | 4 | 2 | 6 | 0 |
| Case 75 | 6 | 29,940,372  | 29,963,622  | 3 | 2 | 5 | 0 |
| Case 75 | 6 | 29,966,620  | 30,025,179  | 4 | 2 | 6 | 0 |
| Case 75 | 6 | 30,025,503  | 31,219,869  | 3 | 2 | 5 | 0 |
| Case 75 | 6 | 31,221,039  | 31,221,039  | 2 | 1 | 3 | 0 |
| Case 75 | 6 | 31,221,485  | 31,247,067  | 4 | 1 | 5 | 0 |
| Case 75 | 6 | 31,247,964  | 31,263,231  | 4 | 2 | 6 | 0 |
| Case 75 | 6 | 31,264,392  | 32,384,677  | 3 | 2 | 5 | 0 |
| Case 75 | 6 | 32,384,721  | 32,401,327  | 4 | 2 | 6 | 0 |
| Case 75 | 6 | 32,401,845  | 47,852,268  | 3 | 2 | 5 | 0 |
| Case 75 | 6 | 47,864,221  | 49,659,871  | 4 | 2 | 6 | 0 |
| Case 75 | 6 | 49,660,418  | 50,845,787  | 3 | 2 | 5 | 0 |
| Case 75 | 6 | 50,857,995  | 51,611,470  | 4 | 2 | 6 | 0 |
| Case 75 | 6 | 51,611,592  | 51,947,999  | 3 | 2 | 5 | 0 |
| Case 75 | 6 | 51,948,935  | 52,025,693  | 4 | 2 | 6 | 0 |
| Case 75 | 6 | 52,038,779  | 53,385,475  | 3 | 2 | 5 | 0 |
| Case 75 | 6 | 53,387,280  | 53,504,277  | 4 | 2 | 6 | 0 |
| Case 75 | 6 | 53,506,487  | 54,274,783  | 3 | 2 | 5 | 0 |
| Case 75 | 6 | 54,278,274  | 54,771,938  | 4 | 2 | 6 | 0 |
| Case 75 | 6 | 54,773,639  | 55,294,820  | 3 | 2 | 5 | 0 |
| Case 75 | 6 | 55,297,418  | 55,656,259  | 4 | 2 | 6 | 0 |
| Case 75 | 6 | 55,657,453  | 57,244,745  | 3 | 2 | 5 | 0 |
| Case 75 | 6 | 57,246,878  | 58,028,607  | 4 | 0 | 4 | 1 |
| Case 75 | 6 | 58,047,654  | 58,055,927  | 3 | 0 | 3 | 1 |
| Case 75 | 6 | 58,150,777  | 58,741,497  | 3 | 2 | 5 | 0 |
| Case 75 | 6 | 58,752,089  | 58,752,089  | 4 | 0 | 4 | 1 |
| Case 75 | 6 | 61,891,118  | 89,554,137  | 4 | 0 | 4 | 1 |
| Case 75 | 6 | 89,601,534  | 89,895,207  | 5 | 0 | 5 | 1 |
| Case 75 | 6 | 89,899,914  | 98,019,080  | 4 | 0 | 4 | 1 |
| Case 75 | 6 | 98,033,236  | 126,052,729 | 5 | 0 | 5 | 1 |
| Case 75 | 6 | 126,057,748 | 130,924,737 | 4 | 0 | 4 | 1 |
| Case 75 | 6 | 130,926,413 | 131,184,914 | 5 | 0 | 5 | 1 |
| Case 75 | 6 | 131,186,708 | 132,043,442 | 4 | 0 | 4 | 1 |
| Case 75 | 6 | 132,045,180 | 132,854,027 | 5 | 0 | 5 | 1 |
| Case 75 | 6 | 132,854,616 | 135,899,344 | 4 | 0 | 4 | 1 |
| Case 75 | 6 | 135,921,139 | 136,475,578 | 5 | 0 | 5 | 1 |
| Case 75 | 6 | 136,482,727 | 143,270,216 | 4 | 0 | 4 | 1 |
| Case 75 | 6 | 143,270,247 | 144,034,848 | 5 | 0 | 5 | 1 |
| Case 75 | 6 | 144,035,357 | 145,199,259 | 4 | 0 | 4 | 1 |
| Case 75 | 6 | 145,201,896 | 145,807,214 | 5 | 0 | 5 | 1 |
| Case 75 | 6 | 145,809,983 | 148,180,666 | 4 | 0 | 4 | 1 |
| Case 75 | 6 | 148,182,196 | 148,262,501 | 3 | 0 | 3 | 1 |
| Case 75 | 6 | 148,266,755 | 156,260,851 | 4 | 0 | 4 | 1 |
| Case 75 | 6 | 156,261,012 | 157,100,348 | 5 | 0 | 5 | 1 |
| Case 75 | 6 | 157,100,585 | 162,886,686 | 4 | 0 | 4 | 1 |
| Case 75 | 6 | 162,888,522 | 162,888,522 | 2 | 0 | 2 | 1 |
| Case 75 | 6 | 162,888,704 | 162,994,422 | 0 | 0 | 0 | 0 |
| Case 75 | 6 | 162,995,680 | 162,995,680 | 2 | 0 | 2 | 1 |
| Case 75 | 6 | 162,996,263 | 162,996,263 | 3 | 0 | 3 | 1 |
| Case 75 | 6 | 162,996,562 | 168,484,085 | 4 | 0 | 4 | 1 |
| Case 75 | 6 | 168,486,186 | 168,654,978 | 5 | 0 | 5 | 1 |
| Case 75 | 6 | 168,664,184 | 170,980,171 | 4 | 0 | 4 | 1 |
| Case 75 | 7 | 44,935      | 1,138,327   | 2 | 2 | 4 | 0 |
| Case 75 | 7 | 1,140,418   | 1,380,226   | 3 | 2 | 5 | 0 |
| Case 75 | 7 | 1,381,028   | 1,529,013   | 2 | 2 | 4 | 0 |
| Case 75 | 7 | 1,529,251   | 1,750,797   | 3 | 2 | 5 | 0 |
| Case 75 | 7 | 1,754,509   | 2,663,538   | 2 | 2 | 4 | 0 |
| Case 75 | 7 | 2,664,214   | 2,911,972   | 3 | 2 | 5 | 0 |
| Case 75 | 7 | 2,915,378   | 3,079,604   | 2 | 2 | 4 | 0 |
| Case 75 | 7 | 3,081,727   | 5,626,564   | 3 | 2 | 5 | 0 |

|         |   |             |             |   |   |   |   |
|---------|---|-------------|-------------|---|---|---|---|
| Case 75 | 7 | 5,630,468   | 6,046,783   | 2 | 2 | 4 | 0 |
| Case 75 | 7 | 6,048,973   | 24,984,666  | 3 | 2 | 5 | 0 |
| Case 75 | 7 | 24,985,941  | 25,190,106  | 2 | 2 | 4 | 0 |
| Case 75 | 7 | 25,194,413  | 44,524,577  | 3 | 2 | 5 | 0 |
| Case 75 | 7 | 44,524,708  | 44,871,948  | 2 | 2 | 4 | 0 |
| Case 75 | 7 | 44,874,113  | 58,019,061  | 3 | 2 | 5 | 0 |
| Case 75 | 7 | 61,056,053  | 61,852,895  | 3 | 2 | 5 | 0 |
| Case 75 | 7 | 61,994,170  | 65,216,099  | 3 | 0 | 3 | 1 |
| Case 75 | 7 | 65,225,195  | 65,449,716  | 4 | 0 | 4 | 1 |
| Case 75 | 7 | 65,453,292  | 73,824,052  | 3 | 0 | 3 | 1 |
| Case 75 | 7 | 73,826,693  | 74,045,054  | 4 | 0 | 4 | 1 |
| Case 75 | 7 | 74,069,645  | 76,054,389  | 3 | 0 | 3 | 1 |
| Case 75 | 7 | 76,054,543  | 76,217,248  | 4 | 0 | 4 | 1 |
| Case 75 | 7 | 76,288,981  | 127,730,776 | 3 | 0 | 3 | 1 |
| Case 75 | 7 | 127,731,618 | 127,857,326 | 4 | 0 | 4 | 1 |
| Case 75 | 7 | 127,857,891 | 129,999,482 | 3 | 0 | 3 | 1 |
| Case 75 | 7 | 130,000,319 | 130,143,812 | 4 | 0 | 4 | 1 |
| Case 75 | 7 | 130,145,589 | 131,189,142 | 3 | 0 | 3 | 1 |
| Case 75 | 7 | 131,189,199 | 131,468,631 | 4 | 0 | 4 | 1 |
| Case 75 | 7 | 131,473,147 | 132,732,992 | 3 | 0 | 3 | 1 |
| Case 75 | 7 | 132,741,757 | 133,041,173 | 4 | 0 | 4 | 1 |
| Case 75 | 7 | 133,045,944 | 134,019,192 | 3 | 0 | 3 | 1 |
| Case 75 | 7 | 134,021,784 | 134,351,368 | 4 | 0 | 4 | 1 |
| Case 75 | 7 | 134,355,631 | 139,138,440 | 3 | 0 | 3 | 1 |
| Case 75 | 7 | 139,138,551 | 139,530,089 | 4 | 0 | 4 | 1 |
| Case 75 | 7 | 139,530,822 | 141,845,864 | 3 | 0 | 3 | 1 |
| Case 75 | 7 | 141,847,782 | 142,460,744 | 4 | 0 | 4 | 1 |
| Case 75 | 7 | 142,460,750 | 143,650,237 | 3 | 0 | 3 | 1 |
| Case 75 | 7 | 143,651,907 | 143,752,228 | 4 | 0 | 4 | 1 |
| Case 75 | 7 | 143,754,959 | 155,672,944 | 3 | 0 | 3 | 1 |
| Case 75 | 7 | 155,676,753 | 155,791,799 | 4 | 0 | 4 | 1 |
| Case 75 | 7 | 155,793,895 | 157,496,629 | 3 | 0 | 3 | 1 |
| Case 75 | 7 | 157,502,916 | 157,502,916 | 2 | 0 | 2 | 1 |
| Case 75 | 7 | 157,508,424 | 157,605,815 | 0 | 0 | 0 | 0 |
| Case 75 | 7 | 157,625,051 | 157,625,051 | 2 | 0 | 2 | 1 |
| Case 75 | 7 | 157,634,220 | 159,119,486 | 3 | 0 | 3 | 1 |
| Case 75 | 8 | 164,984     | 8,625,041   | 3 | 0 | 3 | 1 |
| Case 75 | 8 | 8,629,936   | 8,894,700   | 5 | 0 | 5 | 1 |
| Case 75 | 8 | 8,895,470   | 9,070,973   | 3 | 0 | 3 | 1 |
| Case 75 | 8 | 9,071,416   | 9,223,532   | 4 | 0 | 4 | 1 |
| Case 75 | 8 | 9,224,139   | 17,174,343  | 3 | 0 | 3 | 1 |
| Case 75 | 8 | 17,174,534  | 17,550,854  | 4 | 0 | 4 | 1 |
| Case 75 | 8 | 17,553,839  | 23,104,413  | 3 | 0 | 3 | 1 |
| Case 75 | 8 | 23,104,612  | 23,732,888  | 4 | 0 | 4 | 1 |
| Case 75 | 8 | 23,742,960  | 27,075,395  | 3 | 0 | 3 | 1 |
| Case 75 | 8 | 27,076,127  | 27,517,036  | 4 | 0 | 4 | 1 |
| Case 75 | 8 | 27,520,266  | 27,743,401  | 3 | 0 | 3 | 1 |
| Case 75 | 8 | 27,745,205  | 27,898,660  | 4 | 0 | 4 | 1 |
| Case 75 | 8 | 27,898,705  | 35,576,360  | 3 | 0 | 3 | 1 |
| Case 75 | 8 | 35,579,664  | 43,791,691  | 4 | 0 | 4 | 1 |
| Case 75 | 8 | 46,886,735  | 53,880,054  | 4 | 0 | 4 | 1 |
| Case 75 | 8 | 53,884,020  | 54,704,493  | 5 | 0 | 5 | 1 |
| Case 75 | 8 | 54,708,292  | 100,286,280 | 4 | 0 | 4 | 1 |
| Case 75 | 8 | 100,286,506 | 106,593,207 | 5 | 0 | 5 | 1 |
| Case 75 | 8 | 106,593,662 | 107,024,505 | 4 | 0 | 4 | 1 |
| Case 75 | 8 | 107,024,649 | 110,439,255 | 5 | 0 | 5 | 1 |
| Case 75 | 8 | 110,441,582 | 110,498,978 | 4 | 0 | 4 | 1 |
| Case 75 | 8 | 110,499,005 | 113,234,556 | 5 | 0 | 5 | 1 |
| Case 75 | 8 | 113,235,742 | 114,196,344 | 4 | 0 | 4 | 1 |
| Case 75 | 8 | 114,198,799 | 123,931,864 | 5 | 0 | 5 | 1 |
| Case 75 | 8 | 123,932,061 | 124,440,262 | 4 | 0 | 4 | 1 |

|         |    |             |             |   |   |   |   |
|---------|----|-------------|-------------|---|---|---|---|
| Case 75 | 8  | 124,441,504 | 125,380,008 | 5 | 0 | 5 | 1 |
| Case 75 | 8  | 125,386,971 | 125,570,144 | 4 | 0 | 4 | 1 |
| Case 75 | 8  | 125,570,554 | 126,216,588 | 5 | 0 | 5 | 1 |
| Case 75 | 8  | 126,222,645 | 126,222,645 | 3 | 0 | 3 | 1 |
| Case 75 | 8  | 126,230,230 | 126,688,445 | 6 | 0 | 6 | 1 |
| Case 75 | 8  | 126,689,998 | 126,689,998 | 3 | 0 | 3 | 1 |
| Case 75 | 8  | 126,694,158 | 139,320,268 | 5 | 0 | 5 | 1 |
| Case 75 | 8  | 139,320,385 | 139,856,350 | 4 | 0 | 4 | 1 |
| Case 75 | 8  | 139,856,384 | 143,010,636 | 5 | 0 | 5 | 1 |
| Case 75 | 8  | 143,019,293 | 144,943,023 | 4 | 0 | 4 | 1 |
| Case 75 | 8  | 144,943,109 | 144,976,654 | 5 | 0 | 5 | 1 |
| Case 75 | 8  | 144,984,956 | 145,597,512 | 4 | 0 | 4 | 1 |
| Case 75 | 8  | 145,597,591 | 145,694,720 | 5 | 0 | 5 | 1 |
| Case 75 | 8  | 145,694,912 | 146,293,414 | 4 | 0 | 4 | 1 |
| Case 75 | 9  | 46,587      | 8,738,267   | 3 | 1 | 4 | 0 |
| Case 75 | 9  | 8,739,061   | 17,976,625  | 2 | 1 | 3 | 0 |
| Case 75 | 9  | 17,987,408  | 18,059,000  | 2 | 2 | 4 | 0 |
| Case 75 | 9  | 18,061,140  | 33,439,148  | 2 | 1 | 3 | 0 |
| Case 75 | 9  | 33,439,738  | 33,466,673  | 2 | 2 | 4 | 0 |
| Case 75 | 9  | 33,466,951  | 34,088,701  | 3 | 0 | 3 | 1 |
| Case 75 | 9  | 34,093,400  | 34,124,860  | 3 | 1 | 4 | 0 |
| Case 75 | 9  | 34,126,788  | 35,404,008  | 2 | 1 | 3 | 0 |
| Case 75 | 9  | 35,404,840  | 35,518,997  | 4 | 1 | 5 | 0 |
| Case 75 | 9  | 35,522,318  | 39,103,743  | 2 | 1 | 3 | 0 |
| Case 75 | 9  | 39,179,289  | 46,944,322  | 3 | 1 | 4 | 0 |
| Case 75 | 9  | 65,629,772  | 67,966,514  | 3 | 1 | 4 | 0 |
| Case 75 | 9  | 68,167,130  | 116,776,289 | 2 | 1 | 3 | 0 |
| Case 75 | 9  | 116,778,644 | 116,778,644 | 2 | 2 | 4 | 0 |
| Case 75 | 9  | 116,779,813 | 116,790,352 | 3 | 0 | 3 | 1 |
| Case 75 | 9  | 116,790,511 | 116,939,620 | 3 | 1 | 4 | 0 |
| Case 75 | 9  | 116,940,418 | 117,845,347 | 2 | 1 | 3 | 0 |
| Case 75 | 9  | 117,846,499 | 117,853,022 | 3 | 1 | 4 | 0 |
| Case 75 | 9  | 117,853,103 | 126,935,255 | 2 | 1 | 3 | 0 |
| Case 75 | 9  | 126,935,364 | 127,167,651 | 3 | 1 | 4 | 0 |
| Case 75 | 9  | 127,173,209 | 136,507,456 | 2 | 1 | 3 | 0 |
| Case 75 | 9  | 136,507,473 | 136,597,582 | 2 | 2 | 4 | 0 |
| Case 75 | 9  | 136,597,663 | 136,678,685 | 3 | 2 | 5 | 0 |
| Case 75 | 9  | 136,681,696 | 136,928,276 | 2 | 2 | 4 | 0 |
| Case 75 | 9  | 136,928,644 | 137,470,639 | 3 | 2 | 5 | 0 |
| Case 75 | 9  | 137,476,593 | 137,919,909 | 2 | 2 | 4 | 0 |
| Case 75 | 9  | 137,925,300 | 138,375,861 | 3 | 2 | 5 | 0 |
| Case 75 | 9  | 138,376,372 | 138,440,554 | 2 | 2 | 4 | 0 |
| Case 75 | 9  | 138,440,562 | 138,515,929 | 3 | 2 | 5 | 0 |
| Case 75 | 9  | 138,516,047 | 138,852,938 | 2 | 2 | 4 | 0 |
| Case 75 | 9  | 138,862,766 | 139,099,073 | 3 | 2 | 5 | 0 |
| Case 75 | 9  | 139,100,413 | 139,404,349 | 2 | 2 | 4 | 0 |
| Case 75 | 9  | 139,404,895 | 139,568,047 | 3 | 2 | 5 | 0 |
| Case 75 | 9  | 139,568,280 | 140,738,306 | 2 | 2 | 4 | 0 |
| Case 75 | 9  | 140,751,501 | 141,066,491 | 3 | 2 | 5 | 0 |
| Case 75 | 10 | 98,087      | 7,605,932   | 4 | 1 | 5 | 0 |
| Case 75 | 10 | 7,608,070   | 7,791,290   | 3 | 1 | 4 | 0 |
| Case 75 | 10 | 7,793,035   | 39,097,912  | 4 | 1 | 5 | 0 |
| Case 75 | 10 | 42,436,301  | 42,509,794  | 4 | 1 | 5 | 0 |
| Case 75 | 10 | 42,682,133  | 46,999,893  | 2 | 1 | 3 | 0 |
| Case 75 | 10 | 46,999,947  | 47,087,813  | 3 | 1 | 4 | 0 |
| Case 75 | 10 | 47,101,942  | 75,526,116  | 2 | 1 | 3 | 0 |
| Case 75 | 10 | 75,526,275  | 75,680,236  | 3 | 1 | 4 | 0 |
| Case 75 | 10 | 75,687,849  | 78,117,093  | 2 | 1 | 3 | 0 |
| Case 75 | 10 | 78,122,729  | 78,122,729  | 2 | 2 | 4 | 0 |
| Case 75 | 10 | 78,133,074  | 78,310,828  | 2 | 0 | 2 | 1 |
| Case 75 | 10 | 78,312,002  | 78,341,485  | 3 | 0 | 3 | 1 |

|         |    |             |             |   |   |   |   |
|---------|----|-------------|-------------|---|---|---|---|
| Case 75 | 10 | 78,392,318  | 78,399,498  | 3 | 1 | 4 | 0 |
| Case 75 | 10 | 78,415,481  | 92,907,609  | 2 | 1 | 3 | 0 |
| Case 75 | 10 | 92,909,779  | 118,444,339 | 2 | 2 | 4 | 0 |
| Case 75 | 10 | 118,448,078 | 118,568,352 | 3 | 2 | 5 | 0 |
| Case 75 | 10 | 118,575,606 | 135,477,883 | 2 | 2 | 4 | 0 |
| Case 75 | 11 | 193,146     | 4,335,548   | 3 | 1 | 4 | 0 |
| Case 75 | 11 | 4,387,760   | 5,536,386   | 2 | 1 | 3 | 0 |
| Case 75 | 11 | 5,536,415   | 5,566,591   | 3 | 1 | 4 | 0 |
| Case 75 | 11 | 5,566,615   | 12,082,861  | 2 | 1 | 3 | 0 |
| Case 75 | 11 | 12,083,368  | 12,505,324  | 4 | 1 | 5 | 0 |
| Case 75 | 11 | 12,517,482  | 48,181,601  | 2 | 1 | 3 | 0 |
| Case 75 | 11 | 48,182,237  | 48,286,231  | 3 | 1 | 4 | 0 |
| Case 75 | 11 | 48,286,256  | 50,697,498  | 2 | 1 | 3 | 0 |
| Case 75 | 11 | 51,095,992  | 51,591,253  | 2 | 2 | 4 | 0 |
| Case 75 | 11 | 54,794,237  | 55,362,955  | 2 | 2 | 4 | 0 |
| Case 75 | 11 | 55,370,325  | 55,427,700  | 2 | 0 | 2 | 1 |
| Case 75 | 11 | 55,431,897  | 116,501,684 | 2 | 2 | 4 | 0 |
| Case 75 | 11 | 116,504,377 | 116,822,034 | 3 | 2 | 5 | 0 |
| Case 75 | 11 | 116,826,870 | 117,820,561 | 2 | 2 | 4 | 0 |
| Case 75 | 11 | 117,823,425 | 118,391,375 | 3 | 2 | 5 | 0 |
| Case 75 | 11 | 118,392,082 | 131,469,762 | 2 | 2 | 4 | 0 |
| Case 75 | 11 | 131,484,187 | 132,438,694 | 3 | 2 | 5 | 0 |
| Case 75 | 11 | 132,446,994 | 132,763,567 | 2 | 2 | 4 | 0 |
| Case 75 | 11 | 132,766,569 | 133,931,013 | 3 | 2 | 5 | 0 |
| Case 75 | 11 | 133,932,333 | 134,257,523 | 2 | 2 | 4 | 0 |
| Case 75 | 11 | 134,258,416 | 134,934,063 | 3 | 2 | 5 | 0 |
| Case 75 | 12 | 191,619     | 5,721,910   | 2 | 2 | 4 | 0 |
| Case 75 | 12 | 5,724,358   | 5,988,271   | 3 | 2 | 5 | 0 |
| Case 75 | 12 | 5,988,827   | 33,293,907  | 2 | 2 | 4 | 0 |
| Case 75 | 12 | 33,302,438  | 33,305,855  | 2 | 0 | 2 | 1 |
| Case 75 | 12 | 33,308,928  | 34,853,011  | 2 | 2 | 4 | 0 |
| Case 75 | 12 | 37,876,400  | 40,873,251  | 2 | 2 | 4 | 0 |
| Case 75 | 12 | 40,875,351  | 40,875,963  | 2 | 0 | 2 | 1 |
| Case 75 | 12 | 40,893,165  | 48,150,951  | 2 | 2 | 4 | 0 |
| Case 75 | 12 | 48,151,789  | 48,278,190  | 3 | 2 | 5 | 0 |
| Case 75 | 12 | 48,278,487  | 52,585,677  | 2 | 2 | 4 | 0 |
| Case 75 | 12 | 52,589,630  | 52,678,643  | 3 | 2 | 5 | 0 |
| Case 75 | 12 | 52,680,049  | 58,287,202  | 2 | 2 | 4 | 0 |
| Case 75 | 12 | 58,293,664  | 114,433,852 | 2 | 1 | 3 | 0 |
| Case 75 | 12 | 114,436,089 | 133,810,935 | 2 | 2 | 4 | 0 |
| Case 75 | 13 | 19,058,717  | 19,314,519  | 2 | 0 | 2 | 1 |
| Case 75 | 13 | 19,317,385  | 19,542,317  | 3 | 0 | 3 | 1 |
| Case 75 | 13 | 19,548,826  | 19,719,615  | 2 | 0 | 2 | 1 |
| Case 75 | 13 | 19,724,495  | 19,753,484  | 3 | 0 | 3 | 1 |
| Case 75 | 13 | 19,755,612  | 20,688,590  | 2 | 0 | 2 | 1 |
| Case 75 | 13 | 20,689,298  | 21,165,121  | 3 | 0 | 3 | 1 |
| Case 75 | 13 | 21,165,139  | 21,499,444  | 2 | 0 | 2 | 1 |
| Case 75 | 13 | 21,510,900  | 21,723,281  | 3 | 0 | 3 | 1 |
| Case 75 | 13 | 21,725,633  | 21,904,478  | 2 | 0 | 2 | 1 |
| Case 75 | 13 | 21,908,678  | 21,957,120  | 3 | 0 | 3 | 1 |
| Case 75 | 13 | 21,961,755  | 22,290,101  | 2 | 0 | 2 | 1 |
| Case 75 | 13 | 22,290,189  | 22,674,221  | 3 | 0 | 3 | 1 |
| Case 75 | 13 | 22,675,890  | 22,766,634  | 2 | 0 | 2 | 1 |
| Case 75 | 13 | 22,769,539  | 22,822,727  | 3 | 0 | 3 | 1 |
| Case 75 | 13 | 22,825,387  | 22,941,103  | 2 | 0 | 2 | 1 |
| Case 75 | 13 | 22,941,279  | 23,012,480  | 3 | 0 | 3 | 1 |
| Case 75 | 13 | 23,015,211  | 23,552,555  | 2 | 0 | 2 | 1 |
| Case 75 | 13 | 23,553,518  | 23,563,893  | 3 | 0 | 3 | 1 |
| Case 75 | 13 | 23,564,031  | 23,763,822  | 2 | 0 | 2 | 1 |
| Case 75 | 13 | 23,765,635  | 23,848,395  | 3 | 0 | 3 | 1 |
| Case 75 | 13 | 23,851,799  | 23,915,721  | 2 | 0 | 2 | 1 |

|         |    |            |            |   |   |   |   |
|---------|----|------------|------------|---|---|---|---|
| Case 75 | 13 | 23,926,650 | 23,969,191 | 3 | 0 | 3 | 1 |
| Case 75 | 13 | 23,972,835 | 24,019,052 | 2 | 0 | 2 | 1 |
| Case 75 | 13 | 24,027,213 | 24,028,215 | 3 | 0 | 3 | 1 |
| Case 75 | 13 | 24,030,514 | 24,050,943 | 2 | 0 | 2 | 1 |
| Case 75 | 13 | 24,060,289 | 24,092,428 | 3 | 0 | 3 | 1 |
| Case 75 | 13 | 24,093,467 | 24,521,485 | 2 | 0 | 2 | 1 |
| Case 75 | 13 | 24,524,626 | 24,853,948 | 3 | 0 | 3 | 1 |
| Case 75 | 13 | 24,858,365 | 24,860,487 | 2 | 0 | 2 | 1 |
| Case 75 | 13 | 24,860,526 | 25,029,295 | 3 | 0 | 3 | 1 |
| Case 75 | 13 | 25,030,612 | 25,121,370 | 2 | 0 | 2 | 1 |
| Case 75 | 13 | 25,130,044 | 25,209,409 | 3 | 0 | 3 | 1 |
| Case 75 | 13 | 25,217,395 | 25,241,241 | 2 | 0 | 2 | 1 |
| Case 75 | 13 | 25,241,628 | 25,334,331 | 3 | 0 | 3 | 1 |
| Case 75 | 13 | 25,338,433 | 25,566,317 | 2 | 0 | 2 | 1 |
| Case 75 | 13 | 25,566,804 | 25,680,690 | 3 | 0 | 3 | 1 |
| Case 75 | 13 | 25,681,106 | 25,743,781 | 2 | 0 | 2 | 1 |
| Case 75 | 13 | 25,743,803 | 25,802,268 | 3 | 0 | 3 | 1 |
| Case 75 | 13 | 25,807,090 | 26,437,814 | 2 | 0 | 2 | 1 |
| Case 75 | 13 | 26,438,189 | 26,618,922 | 3 | 0 | 3 | 1 |
| Case 75 | 13 | 26,619,258 | 26,775,032 | 2 | 0 | 2 | 1 |
| Case 75 | 13 | 26,777,135 | 26,789,432 | 3 | 0 | 3 | 1 |
| Case 75 | 13 | 26,789,528 | 26,983,382 | 2 | 0 | 2 | 1 |
| Case 75 | 13 | 26,986,735 | 27,563,038 | 3 | 0 | 3 | 1 |
| Case 75 | 13 | 27,568,482 | 27,879,607 | 2 | 0 | 2 | 1 |
| Case 75 | 13 | 27,880,846 | 28,143,723 | 3 | 0 | 3 | 1 |
| Case 75 | 13 | 28,144,364 | 28,286,672 | 2 | 0 | 2 | 1 |
| Case 75 | 13 | 28,293,086 | 28,443,970 | 3 | 0 | 3 | 1 |
| Case 75 | 13 | 28,450,418 | 28,599,077 | 2 | 0 | 2 | 1 |
| Case 75 | 13 | 28,599,914 | 28,642,034 | 3 | 0 | 3 | 1 |
| Case 75 | 13 | 28,643,728 | 28,875,789 | 2 | 0 | 2 | 1 |
| Case 75 | 13 | 28,879,332 | 28,929,885 | 3 | 0 | 3 | 1 |
| Case 75 | 13 | 28,934,707 | 29,101,681 | 2 | 0 | 2 | 1 |
| Case 75 | 13 | 29,108,487 | 29,209,150 | 3 | 0 | 3 | 1 |
| Case 75 | 13 | 29,209,509 | 29,292,098 | 2 | 0 | 2 | 1 |
| Case 75 | 13 | 29,293,681 | 29,624,339 | 3 | 0 | 3 | 1 |
| Case 75 | 13 | 29,628,679 | 29,889,466 | 2 | 0 | 2 | 1 |
| Case 75 | 13 | 29,889,881 | 30,138,036 | 3 | 0 | 3 | 1 |
| Case 75 | 13 | 30,149,915 | 30,484,862 | 2 | 0 | 2 | 1 |
| Case 75 | 13 | 30,484,979 | 30,762,884 | 3 | 0 | 3 | 1 |
| Case 75 | 13 | 30,769,250 | 30,874,175 | 2 | 0 | 2 | 1 |
| Case 75 | 13 | 30,877,359 | 31,102,759 | 3 | 0 | 3 | 1 |
| Case 75 | 13 | 31,107,818 | 31,232,570 | 2 | 0 | 2 | 1 |
| Case 75 | 13 | 31,232,661 | 31,479,640 | 3 | 0 | 3 | 1 |
| Case 75 | 13 | 31,480,670 | 31,565,230 | 2 | 0 | 2 | 1 |
| Case 75 | 13 | 31,565,687 | 31,714,328 | 3 | 0 | 3 | 1 |
| Case 75 | 13 | 31,714,379 | 31,858,836 | 2 | 0 | 2 | 1 |
| Case 75 | 13 | 31,862,334 | 31,944,795 | 3 | 0 | 3 | 1 |
| Case 75 | 13 | 31,945,277 | 32,800,816 | 2 | 0 | 2 | 1 |
| Case 75 | 13 | 32,805,429 | 32,890,572 | 3 | 0 | 3 | 1 |
| Case 75 | 13 | 32,891,798 | 33,511,317 | 2 | 0 | 2 | 1 |
| Case 75 | 13 | 33,514,022 | 33,606,669 | 3 | 0 | 3 | 1 |
| Case 75 | 13 | 33,606,679 | 33,628,138 | 2 | 0 | 2 | 1 |
| Case 75 | 13 | 33,628,235 | 33,787,522 | 3 | 0 | 3 | 1 |
| Case 75 | 13 | 33,787,573 | 34,184,754 | 2 | 0 | 2 | 1 |
| Case 75 | 13 | 34,185,191 | 34,327,395 | 3 | 0 | 3 | 1 |
| Case 75 | 13 | 34,330,875 | 34,689,213 | 2 | 0 | 2 | 1 |
| Case 75 | 13 | 34,691,840 | 34,997,387 | 3 | 0 | 3 | 1 |
| Case 75 | 13 | 35,000,382 | 36,266,322 | 2 | 0 | 2 | 1 |
| Case 75 | 13 | 36,269,354 | 36,417,436 | 3 | 0 | 3 | 1 |
| Case 75 | 13 | 36,419,470 | 36,723,016 | 2 | 0 | 2 | 1 |
| Case 75 | 13 | 36,730,750 | 36,773,131 | 3 | 0 | 3 | 1 |



|         |    |             |             |   |   |   |   |
|---------|----|-------------|-------------|---|---|---|---|
| Case 75 | 13 | 36,773,632  | 37,293,677  | 2 | 0 | 2 | 1 |
| Case 75 | 13 | 37,296,103  | 37,484,693  | 3 | 0 | 3 | 1 |
| Case 75 | 13 | 37,486,665  | 37,678,149  | 2 | 0 | 2 | 1 |
| Case 75 | 13 | 37,678,394  | 37,679,651  | 3 | 0 | 3 | 1 |
| Case 75 | 13 | 37,679,729  | 39,261,864  | 2 | 0 | 2 | 1 |
| Case 75 | 13 | 39,262,013  | 39,266,540  | 3 | 0 | 3 | 1 |
| Case 75 | 13 | 39,268,845  | 39,544,663  | 2 | 0 | 2 | 1 |
| Case 75 | 13 | 39,545,127  | 39,612,819  | 3 | 0 | 3 | 1 |
| Case 75 | 13 | 39,613,322  | 40,705,939  | 2 | 0 | 2 | 1 |
| Case 75 | 13 | 40,706,991  | 40,821,939  | 3 | 0 | 3 | 1 |
| Case 75 | 13 | 40,822,253  | 40,923,359  | 2 | 0 | 2 | 1 |
| Case 75 | 13 | 40,924,528  | 41,194,032  | 3 | 0 | 3 | 1 |
| Case 75 | 13 | 41,196,407  | 41,370,157  | 2 | 0 | 2 | 1 |
| Case 75 | 13 | 41,371,037  | 41,433,276  | 3 | 0 | 3 | 1 |
| Case 75 | 13 | 41,434,062  | 41,950,643  | 2 | 0 | 2 | 1 |
| Case 75 | 13 | 41,959,056  | 42,185,751  | 3 | 0 | 3 | 1 |
| Case 75 | 13 | 42,185,868  | 43,097,559  | 2 | 0 | 2 | 1 |
| Case 75 | 13 | 43,099,648  | 43,463,299  | 3 | 0 | 3 | 1 |
| Case 75 | 13 | 43,463,359  | 43,685,018  | 2 | 0 | 2 | 1 |
| Case 75 | 13 | 43,692,582  | 43,935,153  | 3 | 0 | 3 | 1 |
| Case 75 | 13 | 43,935,476  | 44,710,947  | 2 | 0 | 2 | 1 |
| Case 75 | 13 | 44,720,217  | 44,981,909  | 3 | 0 | 3 | 1 |
| Case 75 | 13 | 45,000,340  | 45,299,080  | 2 | 0 | 2 | 1 |
| Case 75 | 13 | 45,303,639  | 45,572,614  | 3 | 0 | 3 | 1 |
| Case 75 | 13 | 45,582,765  | 45,608,200  | 2 | 0 | 2 | 1 |
| Case 75 | 13 | 45,617,777  | 45,725,918  | 3 | 0 | 3 | 1 |
| Case 75 | 13 | 45,729,211  | 46,108,856  | 2 | 0 | 2 | 1 |
| Case 75 | 13 | 46,112,492  | 46,156,489  | 3 | 0 | 3 | 1 |
| Case 75 | 13 | 46,157,367  | 46,274,638  | 2 | 0 | 2 | 1 |
| Case 75 | 13 | 46,276,071  | 46,563,129  | 3 | 0 | 3 | 1 |
| Case 75 | 13 | 46,566,423  | 46,942,314  | 2 | 0 | 2 | 1 |
| Case 75 | 13 | 46,942,882  | 47,249,860  | 3 | 0 | 3 | 1 |
| Case 75 | 13 | 47,251,712  | 47,314,896  | 2 | 0 | 2 | 1 |
| Case 75 | 13 | 47,315,369  | 47,325,150  | 3 | 0 | 3 | 1 |
| Case 75 | 13 | 47,327,160  | 48,664,499  | 2 | 0 | 2 | 1 |
| Case 75 | 13 | 48,669,181  | 48,774,250  | 3 | 0 | 3 | 1 |
| Case 75 | 13 | 48,786,076  | 49,776,080  | 2 | 0 | 2 | 1 |
| Case 75 | 13 | 49,781,232  | 49,810,881  | 3 | 0 | 3 | 1 |
| Case 75 | 13 | 49,815,405  | 51,571,545  | 4 | 2 | 6 | 0 |
| Case 75 | 13 | 51,573,708  | 52,325,542  | 4 | 1 | 5 | 0 |
| Case 75 | 13 | 52,326,477  | 52,409,860  | 4 | 2 | 6 | 0 |
| Case 75 | 13 | 52,410,120  | 53,191,674  | 4 | 1 | 5 | 0 |
| Case 75 | 13 | 53,199,837  | 57,183,350  | 4 | 2 | 6 | 0 |
| Case 75 | 13 | 57,190,005  | 76,371,876  | 6 | 1 | 7 | 0 |
| Case 75 | 13 | 76,374,826  | 76,453,115  | 5 | 1 | 6 | 0 |
| Case 75 | 13 | 76,453,458  | 86,364,396  | 6 | 1 | 7 | 0 |
| Case 75 | 13 | 86,368,225  | 86,499,673  | 5 | 1 | 6 | 0 |
| Case 75 | 13 | 86,505,542  | 88,312,331  | 6 | 1 | 7 | 0 |
| Case 75 | 13 | 88,325,746  | 88,357,841  | 5 | 1 | 6 | 0 |
| Case 75 | 13 | 88,362,635  | 90,763,957  | 6 | 1 | 7 | 0 |
| Case 75 | 13 | 90,767,616  | 91,232,507  | 5 | 1 | 6 | 0 |
| Case 75 | 13 | 91,233,714  | 91,563,036  | 6 | 1 | 7 | 0 |
| Case 75 | 13 | 91,568,390  | 92,660,099  | 5 | 1 | 6 | 0 |
| Case 75 | 13 | 92,663,433  | 94,280,492  | 6 | 1 | 7 | 0 |
| Case 75 | 13 | 94,284,016  | 96,360,501  | 5 | 1 | 6 | 0 |
| Case 75 | 13 | 96,361,404  | 96,710,538  | 6 | 1 | 7 | 0 |
| Case 75 | 13 | 96,719,729  | 104,009,628 | 5 | 1 | 6 | 0 |
| Case 75 | 13 | 104,011,916 | 104,934,976 | 6 | 1 | 7 | 0 |
| Case 75 | 13 | 104,935,038 | 104,988,207 | 5 | 1 | 6 | 0 |
| Case 75 | 13 | 104,989,453 | 105,904,340 | 6 | 1 | 7 | 0 |
| Case 75 | 13 | 105,904,808 | 108,082,350 | 5 | 1 | 6 | 0 |

|         |    |             |             |   |   |   |   |
|---------|----|-------------|-------------|---|---|---|---|
| Case 75 | 13 | 108,085,618 | 108,269,796 | 6 | 1 | 7 | 0 |
| Case 75 | 13 | 108,271,076 | 115,103,529 | 5 | 1 | 6 | 0 |
| Case 75 | 14 | 19,280,733  | 20,249,266  | 2 | 2 | 4 | 0 |
| Case 75 | 14 | 20,249,286  | 20,420,338  | 3 | 2 | 5 | 0 |
| Case 75 | 14 | 20,425,051  | 20,743,269  | 2 | 2 | 4 | 0 |
| Case 75 | 14 | 20,746,792  | 20,758,949  | 3 | 2 | 5 | 0 |
| Case 75 | 14 | 20,760,285  | 27,348,573  | 2 | 2 | 4 | 0 |
| Case 75 | 14 | 27,350,629  | 27,467,034  | 3 | 0 | 3 | 1 |
| Case 75 | 14 | 27,467,145  | 36,767,424  | 2 | 2 | 4 | 0 |
| Case 75 | 14 | 36,768,276  | 36,940,484  | 2 | 1 | 3 | 0 |
| Case 75 | 14 | 36,941,269  | 43,030,843  | 2 | 2 | 4 | 0 |
| Case 75 | 14 | 43,055,621  | 43,172,278  | 2 | 1 | 3 | 0 |
| Case 75 | 14 | 43,173,574  | 43,511,360  | 2 | 2 | 4 | 0 |
| Case 75 | 14 | 43,512,251  | 43,975,155  | 2 | 1 | 3 | 0 |
| Case 75 | 14 | 43,975,208  | 44,150,766  | 2 | 2 | 4 | 0 |
| Case 75 | 14 | 44,178,070  | 44,806,096  | 2 | 1 | 3 | 0 |
| Case 75 | 14 | 44,807,463  | 45,148,226  | 2 | 2 | 4 | 0 |
| Case 75 | 14 | 45,149,546  | 45,282,680  | 2 | 1 | 3 | 0 |
| Case 75 | 14 | 45,283,699  | 45,568,276  | 2 | 2 | 4 | 0 |
| Case 75 | 14 | 45,571,811  | 45,716,366  | 2 | 1 | 3 | 0 |
| Case 75 | 14 | 45,716,411  | 46,868,523  | 2 | 2 | 4 | 0 |
| Case 75 | 14 | 46,873,257  | 48,161,473  | 2 | 1 | 3 | 0 |
| Case 75 | 14 | 48,162,338  | 51,372,606  | 2 | 2 | 4 | 0 |
| Case 75 | 14 | 51,375,654  | 51,376,809  | 2 | 0 | 2 | 1 |
| Case 75 | 14 | 51,378,517  | 56,054,354  | 2 | 2 | 4 | 0 |
| Case 75 | 14 | 56,058,049  | 56,146,356  | 2 | 1 | 3 | 0 |
| Case 75 | 14 | 56,147,540  | 56,173,687  | 3 | 0 | 3 | 1 |
| Case 75 | 14 | 56,177,363  | 58,605,635  | 2 | 2 | 4 | 0 |
| Case 75 | 14 | 58,605,734  | 58,873,671  | 3 | 0 | 3 | 1 |
| Case 75 | 14 | 58,874,094  | 60,811,999  | 2 | 2 | 4 | 0 |
| Case 75 | 14 | 60,818,257  | 60,950,509  | 2 | 1 | 3 | 0 |
| Case 75 | 14 | 60,951,790  | 81,107,797  | 2 | 2 | 4 | 0 |
| Case 75 | 14 | 81,111,651  | 81,239,929  | 2 | 1 | 3 | 0 |
| Case 75 | 14 | 81,244,350  | 83,790,259  | 2 | 2 | 4 | 0 |
| Case 75 | 14 | 83,792,268  | 83,877,181  | 3 | 0 | 3 | 1 |
| Case 75 | 14 | 83,884,622  | 84,159,334  | 2 | 2 | 4 | 0 |
| Case 75 | 14 | 84,163,810  | 84,272,380  | 3 | 0 | 3 | 1 |
| Case 75 | 14 | 84,273,612  | 84,365,609  | 2 | 2 | 4 | 0 |
| Case 75 | 14 | 84,373,402  | 84,672,292  | 3 | 0 | 3 | 1 |
| Case 75 | 14 | 84,672,729  | 92,421,275  | 2 | 2 | 4 | 0 |
| Case 75 | 14 | 92,423,309  | 92,472,218  | 2 | 1 | 3 | 0 |
| Case 75 | 14 | 92,472,368  | 96,772,059  | 2 | 2 | 4 | 0 |
| Case 75 | 14 | 96,772,062  | 96,848,757  | 2 | 1 | 3 | 0 |
| Case 75 | 14 | 96,852,010  | 97,262,829  | 2 | 2 | 4 | 0 |
| Case 75 | 14 | 97,268,547  | 97,362,492  | 2 | 1 | 3 | 0 |
| Case 75 | 14 | 97,362,657  | 107,287,663 | 2 | 2 | 4 | 0 |
| Case 75 | 15 | 20,034,919  | 20,212,798  | 3 | 2 | 5 | 0 |
| Case 75 | 15 | 20,612,840  | 22,427,966  | 2 | 1 | 3 | 0 |
| Case 75 | 15 | 22,652,330  | 31,439,804  | 2 | 2 | 4 | 0 |
| Case 75 | 15 | 31,440,697  | 31,633,161  | 3 | 2 | 5 | 0 |
| Case 75 | 15 | 31,637,996  | 64,648,186  | 2 | 2 | 4 | 0 |
| Case 75 | 15 | 64,656,242  | 64,933,982  | 2 | 0 | 2 | 1 |
| Case 75 | 15 | 64,962,630  | 72,462,219  | 2 | 2 | 4 | 0 |
| Case 75 | 15 | 72,462,255  | 74,609,378  | 3 | 2 | 5 | 0 |
| Case 75 | 15 | 74,610,400  | 74,655,342  | 2 | 2 | 4 | 0 |
| Case 75 | 15 | 74,655,583  | 82,563,991  | 3 | 2 | 5 | 0 |
| Case 75 | 15 | 82,564,057  | 83,366,296  | 2 | 2 | 4 | 0 |
| Case 75 | 15 | 83,367,732  | 89,731,776  | 3 | 2 | 5 | 0 |
| Case 75 | 15 | 89,733,007  | 89,873,364  | 2 | 2 | 4 | 0 |
| Case 75 | 15 | 89,873,415  | 90,099,369  | 3 | 2 | 5 | 0 |
| Case 75 | 15 | 90,100,100  | 90,227,105  | 2 | 2 | 4 | 0 |

|         |    |             |             |   |   |   |   |
|---------|----|-------------|-------------|---|---|---|---|
| Case 75 | 15 | 90,227,122  | 99,664,037  | 3 | 2 | 5 | 0 |
| Case 75 | 15 | 99,664,045  | 99,672,558  | 2 | 2 | 4 | 0 |
| Case 75 | 15 | 99,672,722  | 101,421,673 | 3 | 2 | 5 | 0 |
| Case 75 | 15 | 101,421,872 | 101,552,312 | 2 | 2 | 4 | 0 |
| Case 75 | 15 | 101,554,904 | 102,224,423 | 3 | 2 | 5 | 0 |
| Case 75 | 15 | 102,226,241 | 102,461,162 | 2 | 2 | 4 | 0 |
| Case 75 | 16 | 88,165      | 309,524     | 3 | 0 | 3 | 1 |
| Case 75 | 16 | 309,998     | 333,284     | 2 | 0 | 2 | 1 |
| Case 75 | 16 | 333,338     | 511,763     | 3 | 0 | 3 | 1 |
| Case 75 | 16 | 514,407     | 865,040     | 2 | 0 | 2 | 1 |
| Case 75 | 16 | 866,053     | 904,599     | 3 | 0 | 3 | 1 |
| Case 75 | 16 | 904,628     | 1,255,545   | 2 | 0 | 2 | 1 |
| Case 75 | 16 | 1,256,122   | 1,271,987   | 3 | 0 | 3 | 1 |
| Case 75 | 16 | 1,272,038   | 1,396,285   | 2 | 0 | 2 | 1 |
| Case 75 | 16 | 1,396,609   | 1,536,938   | 3 | 0 | 3 | 1 |
| Case 75 | 16 | 1,537,391   | 1,573,926   | 2 | 0 | 2 | 1 |
| Case 75 | 16 | 1,574,252   | 1,798,325   | 3 | 0 | 3 | 1 |
| Case 75 | 16 | 1,799,407   | 1,997,096   | 2 | 0 | 2 | 1 |
| Case 75 | 16 | 1,997,206   | 2,002,960   | 3 | 0 | 3 | 1 |
| Case 75 | 16 | 2,003,399   | 2,005,563   | 2 | 0 | 2 | 1 |
| Case 75 | 16 | 2,006,099   | 2,024,204   | 3 | 0 | 3 | 1 |
| Case 75 | 16 | 2,024,205   | 2,045,731   | 2 | 0 | 2 | 1 |
| Case 75 | 16 | 2,048,437   | 2,130,189   | 3 | 0 | 3 | 1 |
| Case 75 | 16 | 2,130,190   | 2,158,623   | 2 | 0 | 2 | 1 |
| Case 75 | 16 | 2,159,242   | 2,208,889   | 3 | 0 | 3 | 1 |
| Case 75 | 16 | 2,215,883   | 2,244,531   | 2 | 0 | 2 | 1 |
| Case 75 | 16 | 2,247,362   | 2,259,955   | 3 | 0 | 3 | 1 |
| Case 75 | 16 | 2,259,986   | 2,329,121   | 2 | 0 | 2 | 1 |
| Case 75 | 16 | 2,331,173   | 2,506,918   | 3 | 0 | 3 | 1 |
| Case 75 | 16 | 2,510,603   | 2,637,283   | 2 | 0 | 2 | 1 |
| Case 75 | 16 | 2,640,086   | 3,166,547   | 3 | 0 | 3 | 1 |
| Case 75 | 16 | 3,170,210   | 3,227,885   | 2 | 0 | 2 | 1 |
| Case 75 | 16 | 3,230,888   | 3,299,586   | 3 | 0 | 3 | 1 |
| Case 75 | 16 | 3,299,609   | 3,367,840   | 2 | 0 | 2 | 1 |
| Case 75 | 16 | 3,372,481   | 3,594,316   | 3 | 0 | 3 | 1 |
| Case 75 | 16 | 3,598,190   | 3,614,540   | 2 | 0 | 2 | 1 |
| Case 75 | 16 | 3,614,739   | 4,042,449   | 3 | 0 | 3 | 1 |
| Case 75 | 16 | 4,049,365   | 4,969,222   | 2 | 2 | 4 | 0 |
| Case 75 | 16 | 4,972,963   | 5,077,157   | 3 | 2 | 5 | 0 |
| Case 75 | 16 | 5,077,160   | 5,122,041   | 2 | 2 | 4 | 0 |
| Case 75 | 16 | 5,123,474   | 5,479,168   | 3 | 2 | 5 | 0 |
| Case 75 | 16 | 5,489,632   | 5,613,997   | 2 | 2 | 4 | 0 |
| Case 75 | 16 | 5,618,728   | 10,989,612  | 3 | 2 | 5 | 0 |
| Case 75 | 16 | 10,991,878  | 11,136,204  | 2 | 2 | 4 | 0 |
| Case 75 | 16 | 11,141,321  | 11,749,774  | 3 | 2 | 5 | 0 |
| Case 75 | 16 | 11,750,830  | 12,060,082  | 2 | 2 | 4 | 0 |
| Case 75 | 16 | 12,060,097  | 14,540,868  | 3 | 2 | 5 | 0 |
| Case 75 | 16 | 14,540,918  | 15,733,076  | 2 | 2 | 4 | 0 |
| Case 75 | 16 | 15,733,081  | 19,474,685  | 3 | 2 | 5 | 0 |
| Case 75 | 16 | 19,474,688  | 19,640,020  | 2 | 2 | 4 | 0 |
| Case 75 | 16 | 19,640,068  | 23,052,497  | 3 | 2 | 5 | 0 |
| Case 75 | 16 | 23,061,630  | 23,322,445  | 2 | 2 | 4 | 0 |
| Case 75 | 16 | 23,324,849  | 24,580,298  | 3 | 2 | 5 | 0 |
| Case 75 | 16 | 24,580,646  | 24,834,982  | 2 | 2 | 4 | 0 |
| Case 75 | 16 | 24,835,018  | 25,232,875  | 3 | 2 | 5 | 0 |
| Case 75 | 16 | 25,234,671  | 32,257,633  | 2 | 1 | 3 | 0 |
| Case 75 | 16 | 32,392,598  | 35,285,582  | 2 | 2 | 4 | 0 |
| Case 75 | 16 | 46,450,037  | 46,744,689  | 2 | 2 | 4 | 0 |
| Case 75 | 16 | 46,755,060  | 50,718,801  | 3 | 2 | 5 | 0 |
| Case 75 | 16 | 50,723,074  | 50,815,188  | 2 | 2 | 4 | 0 |
| Case 75 | 16 | 50,817,219  | 51,019,711  | 3 | 2 | 5 | 0 |

|         |    |            |            |   |   |   |   |
|---------|----|------------|------------|---|---|---|---|
| Case 75 | 16 | 51,025,933 | 51,248,783 | 2 | 2 | 4 | 0 |
| Case 75 | 16 | 51,258,826 | 55,732,620 | 3 | 2 | 5 | 0 |
| Case 75 | 16 | 55,733,589 | 56,081,918 | 2 | 2 | 4 | 0 |
| Case 75 | 16 | 56,082,843 | 57,440,896 | 3 | 2 | 5 | 0 |
| Case 75 | 16 | 57,441,407 | 57,610,423 | 2 | 2 | 4 | 0 |
| Case 75 | 16 | 57,610,796 | 57,682,275 | 3 | 2 | 5 | 0 |
| Case 75 | 16 | 57,683,091 | 57,789,091 | 2 | 2 | 4 | 0 |
| Case 75 | 16 | 57,789,288 | 57,926,171 | 3 | 2 | 5 | 0 |
| Case 75 | 16 | 57,926,847 | 58,327,774 | 2 | 2 | 4 | 0 |
| Case 75 | 16 | 58,327,945 | 62,332,472 | 3 | 2 | 5 | 0 |
| Case 75 | 16 | 62,336,454 | 63,169,289 | 4 | 2 | 6 | 0 |
| Case 75 | 16 | 63,173,259 | 63,718,779 | 6 | 1 | 7 | 0 |
| Case 75 | 16 | 63,718,945 | 65,988,234 | 4 | 2 | 6 | 0 |
| Case 75 | 16 | 65,993,854 | 66,031,786 | 3 | 3 | 6 | 0 |
| Case 75 | 16 | 66,043,905 | 66,413,150 | 5 | 2 | 7 | 0 |
| Case 75 | 16 | 66,413,195 | 66,413,371 | 3 | 2 | 5 | 0 |
| Case 75 | 16 | 66,415,792 | 66,527,099 | 4 | 2 | 6 | 0 |
| Case 75 | 16 | 66,527,192 | 69,115,649 | 4 | 1 | 5 | 0 |
| Case 75 | 16 | 69,117,397 | 70,818,759 | 5 | 1 | 6 | 0 |
| Case 75 | 16 | 70,819,670 | 70,823,505 | 6 | 1 | 7 | 0 |
| Case 75 | 16 | 70,824,983 | 70,824,983 | 2 | 2 | 4 | 0 |
| Case 75 | 16 | 70,833,405 | 71,196,543 | 3 | 2 | 5 | 0 |
| Case 75 | 16 | 71,206,836 | 71,249,346 | 4 | 2 | 6 | 0 |
| Case 75 | 16 | 71,264,561 | 71,358,949 | 6 | 1 | 7 | 0 |
| Case 75 | 16 | 71,360,615 | 75,549,885 | 5 | 1 | 6 | 0 |
| Case 75 | 16 | 75,556,838 | 75,558,483 | 6 | 1 | 7 | 0 |
| Case 75 | 16 | 75,560,416 | 75,561,195 | 2 | 2 | 4 | 0 |
| Case 75 | 16 | 75,563,237 | 75,601,983 | 3 | 2 | 5 | 0 |
| Case 75 | 16 | 75,602,797 | 77,323,235 | 4 | 2 | 6 | 0 |
| Case 75 | 16 | 77,323,247 | 77,432,832 | 4 | 1 | 5 | 0 |
| Case 75 | 16 | 77,435,266 | 77,981,586 | 4 | 2 | 6 | 0 |
| Case 75 | 16 | 77,983,488 | 78,153,157 | 4 | 1 | 5 | 0 |
| Case 75 | 16 | 78,160,462 | 79,013,587 | 4 | 2 | 6 | 0 |
| Case 75 | 16 | 79,016,116 | 88,346,709 | 2 | 1 | 3 | 0 |
| Case 75 | 16 | 88,348,934 | 88,570,383 | 2 | 2 | 4 | 0 |
| Case 75 | 16 | 88,580,796 | 89,925,556 | 2 | 1 | 3 | 0 |
| Case 75 | 16 | 89,925,691 | 90,274,695 | 2 | 2 | 4 | 0 |
| Case 75 | 17 | 11,885     | 4,151,820  | 4 | 0 | 4 | 1 |
| Case 75 | 17 | 4,154,426  | 4,510,772  | 5 | 0 | 5 | 1 |
| Case 75 | 17 | 4,510,777  | 13,150,447 | 4 | 0 | 4 | 1 |
| Case 75 | 17 | 13,152,158 | 13,176,356 | 3 | 0 | 3 | 1 |
| Case 75 | 17 | 13,176,812 | 13,358,465 | 2 | 0 | 2 | 1 |
| Case 75 | 17 | 13,360,236 | 13,476,403 | 3 | 0 | 3 | 1 |
| Case 75 | 17 | 13,477,166 | 13,625,139 | 2 | 0 | 2 | 1 |
| Case 75 | 17 | 13,625,164 | 13,949,962 | 3 | 0 | 3 | 1 |
| Case 75 | 17 | 13,954,351 | 14,001,075 | 2 | 0 | 2 | 1 |
| Case 75 | 17 | 14,002,415 | 14,110,391 | 3 | 0 | 3 | 1 |
| Case 75 | 17 | 14,110,451 | 14,188,793 | 2 | 0 | 2 | 1 |
| Case 75 | 17 | 14,194,963 | 14,263,289 | 3 | 0 | 3 | 1 |
| Case 75 | 17 | 14,266,938 | 14,291,932 | 2 | 0 | 2 | 1 |
| Case 75 | 17 | 14,292,908 | 14,530,715 | 3 | 0 | 3 | 1 |
| Case 75 | 17 | 14,534,945 | 14,619,256 | 2 | 0 | 2 | 1 |
| Case 75 | 17 | 14,620,241 | 14,655,692 | 3 | 0 | 3 | 1 |
| Case 75 | 17 | 14,655,755 | 14,823,622 | 2 | 0 | 2 | 1 |
| Case 75 | 17 | 14,827,887 | 15,604,541 | 3 | 0 | 3 | 1 |
| Case 75 | 17 | 15,609,802 | 15,848,690 | 2 | 0 | 2 | 1 |
| Case 75 | 17 | 15,848,848 | 16,089,962 | 3 | 0 | 3 | 1 |
| Case 75 | 17 | 16,097,792 | 16,201,160 | 2 | 0 | 2 | 1 |
| Case 75 | 17 | 16,203,290 | 16,422,727 | 3 | 0 | 3 | 1 |
| Case 75 | 17 | 16,423,881 | 16,572,573 | 2 | 0 | 2 | 1 |
| Case 75 | 17 | 16,576,609 | 17,907,768 | 3 | 0 | 3 | 1 |

|         |    |            |            |   |   |   |   |
|---------|----|------------|------------|---|---|---|---|
| Case 75 | 17 | 17,909,524 | 17,942,293 | 2 | 0 | 2 | 1 |
| Case 75 | 17 | 17,946,107 | 18,167,175 | 3 | 0 | 3 | 1 |
| Case 75 | 17 | 18,167,286 | 18,181,588 | 2 | 0 | 2 | 1 |
| Case 75 | 17 | 18,181,592 | 18,924,345 | 3 | 0 | 3 | 1 |
| Case 75 | 17 | 19,142,226 | 19,168,912 | 4 | 2 | 6 | 0 |
| Case 75 | 17 | 19,172,196 | 19,237,487 | 6 | 1 | 7 | 0 |
| Case 75 | 17 | 19,237,613 | 19,652,366 | 5 | 1 | 6 | 0 |
| Case 75 | 17 | 19,652,676 | 19,871,740 | 6 | 1 | 7 | 0 |
| Case 75 | 17 | 19,882,084 | 20,417,975 | 5 | 1 | 6 | 0 |
| Case 75 | 17 | 20,447,188 | 20,896,038 | 6 | 1 | 7 | 0 |
| Case 75 | 17 | 20,903,080 | 21,268,224 | 5 | 1 | 6 | 0 |
| Case 75 | 17 | 21,273,528 | 21,303,007 | 6 | 1 | 7 | 0 |
| Case 75 | 17 | 21,318,748 | 21,318,995 | 2 | 2 | 4 | 0 |
| Case 75 | 17 | 21,319,222 | 22,242,355 | 3 | 2 | 5 | 0 |
| Case 75 | 17 | 25,268,142 | 25,268,142 | 3 | 2 | 5 | 0 |
| Case 75 | 17 | 25,295,032 | 26,864,390 | 3 | 3 | 6 | 0 |
| Case 75 | 17 | 26,864,402 | 26,868,735 | 5 | 2 | 7 | 0 |
| Case 75 | 17 | 26,871,485 | 27,448,660 | 3 | 2 | 5 | 0 |
| Case 75 | 17 | 27,448,686 | 36,486,721 | 3 | 3 | 6 | 0 |
| Case 75 | 17 | 36,486,802 | 38,297,859 | 5 | 2 | 7 | 0 |
| Case 75 | 17 | 38,303,547 | 38,715,186 | 3 | 2 | 5 | 0 |
| Case 75 | 17 | 38,716,360 | 38,948,759 | 4 | 2 | 6 | 0 |
| Case 75 | 17 | 38,950,184 | 39,197,615 | 4 | 1 | 5 | 0 |
| Case 75 | 17 | 39,229,555 | 39,335,107 | 4 | 2 | 6 | 0 |
| Case 75 | 17 | 39,336,064 | 39,578,553 | 3 | 2 | 5 | 0 |
| Case 75 | 17 | 39,578,810 | 40,039,454 | 3 | 3 | 6 | 0 |
| Case 75 | 17 | 40,039,467 | 40,042,392 | 5 | 2 | 7 | 0 |
| Case 75 | 17 | 40,043,952 | 40,344,469 | 3 | 2 | 5 | 0 |
| Case 75 | 17 | 40,344,516 | 40,913,505 | 4 | 2 | 6 | 0 |
| Case 75 | 17 | 40,915,557 | 40,931,054 | 3 | 2 | 5 | 0 |
| Case 75 | 17 | 40,931,055 | 41,170,720 | 4 | 1 | 5 | 0 |
| Case 75 | 17 | 41,173,086 | 41,836,082 | 4 | 2 | 6 | 0 |
| Case 75 | 17 | 41,840,802 | 42,482,377 | 3 | 2 | 5 | 0 |
| Case 75 | 17 | 42,484,001 | 43,200,294 | 4 | 2 | 6 | 0 |
| Case 75 | 17 | 43,200,918 | 44,862,613 | 4 | 1 | 5 | 0 |
| Case 75 | 17 | 44,865,439 | 45,891,202 | 4 | 2 | 6 | 0 |
| Case 75 | 17 | 45,892,679 | 46,137,021 | 4 | 1 | 5 | 0 |
| Case 75 | 17 | 46,142,680 | 46,563,757 | 4 | 2 | 6 | 0 |
| Case 75 | 17 | 46,567,134 | 46,703,144 | 4 | 1 | 5 | 0 |
| Case 75 | 17 | 46,703,352 | 46,847,447 | 4 | 2 | 6 | 0 |
| Case 75 | 17 | 46,848,470 | 47,090,785 | 4 | 1 | 5 | 0 |
| Case 75 | 17 | 47,106,878 | 47,554,916 | 4 | 2 | 6 | 0 |
| Case 75 | 17 | 47,561,254 | 47,793,645 | 4 | 1 | 5 | 0 |
| Case 75 | 17 | 47,797,692 | 48,122,322 | 4 | 2 | 6 | 0 |
| Case 75 | 17 | 48,129,773 | 48,290,686 | 4 | 1 | 5 | 0 |
| Case 75 | 17 | 48,298,966 | 48,357,416 | 4 | 2 | 6 | 0 |
| Case 75 | 17 | 48,358,419 | 48,978,368 | 3 | 2 | 5 | 0 |
| Case 75 | 17 | 48,978,654 | 51,831,506 | 4 | 2 | 6 | 0 |
| Case 75 | 17 | 51,848,808 | 51,914,886 | 4 | 1 | 5 | 0 |
| Case 75 | 17 | 51,923,536 | 53,809,165 | 4 | 2 | 6 | 0 |
| Case 75 | 17 | 53,810,408 | 53,894,146 | 4 | 1 | 5 | 0 |
| Case 75 | 17 | 53,900,140 | 54,872,439 | 4 | 2 | 6 | 0 |
| Case 75 | 17 | 54,872,480 | 55,075,749 | 3 | 2 | 5 | 0 |
| Case 75 | 17 | 55,076,760 | 55,342,518 | 4 | 2 | 6 | 0 |
| Case 75 | 17 | 55,343,369 | 55,540,976 | 4 | 1 | 5 | 0 |
| Case 75 | 17 | 55,543,961 | 55,555,721 | 2 | 0 | 2 | 1 |
| Case 75 | 17 | 55,560,015 | 55,653,436 | 3 | 0 | 3 | 1 |
| Case 75 | 17 | 55,656,858 | 55,917,919 | 4 | 2 | 6 | 0 |
| Case 75 | 17 | 55,918,299 | 56,357,737 | 3 | 2 | 5 | 0 |
| Case 75 | 17 | 56,357,803 | 56,540,267 | 4 | 2 | 6 | 0 |
| Case 75 | 17 | 56,544,280 | 56,621,519 | 3 | 2 | 5 | 0 |

|         |    |            |            |   |   |   |   |
|---------|----|------------|------------|---|---|---|---|
| Case 75 | 17 | 56,624,291 | 57,970,654 | 4 | 2 | 6 | 0 |
| Case 75 | 17 | 57,989,860 | 58,117,429 | 3 | 3 | 6 | 0 |
| Case 75 | 17 | 58,118,316 | 58,275,994 | 4 | 1 | 5 | 0 |
| Case 75 | 17 | 58,282,990 | 59,514,694 | 4 | 2 | 6 | 0 |
| Case 75 | 17 | 59,516,834 | 59,567,791 | 4 | 1 | 5 | 0 |
| Case 75 | 17 | 59,570,858 | 60,472,465 | 4 | 2 | 6 | 0 |
| Case 75 | 17 | 60,472,551 | 60,882,097 | 4 | 1 | 5 | 0 |
| Case 75 | 17 | 60,882,789 | 61,466,774 | 4 | 2 | 6 | 0 |
| Case 75 | 17 | 61,477,071 | 63,143,298 | 4 | 1 | 5 | 0 |
| Case 75 | 17 | 63,146,868 | 63,429,977 | 4 | 2 | 6 | 0 |
| Case 75 | 17 | 63,440,108 | 63,554,536 | 4 | 1 | 5 | 0 |
| Case 75 | 17 | 63,554,591 | 64,857,460 | 4 | 2 | 6 | 0 |
| Case 75 | 17 | 64,857,662 | 64,907,620 | 4 | 1 | 5 | 0 |
| Case 75 | 17 | 64,908,600 | 66,225,185 | 4 | 2 | 6 | 0 |
| Case 75 | 17 | 66,226,086 | 66,430,889 | 4 | 1 | 5 | 0 |
| Case 75 | 17 | 66,430,923 | 66,714,282 | 4 | 2 | 6 | 0 |
| Case 75 | 17 | 66,719,237 | 66,878,099 | 3 | 0 | 3 | 1 |
| Case 75 | 17 | 66,878,774 | 67,435,050 | 2 | 0 | 2 | 1 |
| Case 75 | 17 | 67,440,811 | 67,940,507 | 3 | 0 | 3 | 1 |
| Case 75 | 17 | 67,942,734 | 68,114,959 | 2 | 0 | 2 | 1 |
| Case 75 | 17 | 68,115,346 | 68,190,826 | 3 | 0 | 3 | 1 |
| Case 75 | 17 | 68,195,046 | 70,897,198 | 4 | 2 | 6 | 0 |
| Case 75 | 17 | 70,899,618 | 71,088,265 | 4 | 1 | 5 | 0 |
| Case 75 | 17 | 71,090,495 | 71,193,043 | 4 | 2 | 6 | 0 |
| Case 75 | 17 | 71,193,053 | 71,458,742 | 3 | 2 | 5 | 0 |
| Case 75 | 17 | 71,459,147 | 71,689,995 | 4 | 2 | 6 | 0 |
| Case 75 | 17 | 71,695,322 | 72,570,776 | 3 | 0 | 3 | 1 |
| Case 75 | 17 | 72,572,408 | 72,588,352 | 2 | 0 | 2 | 1 |
| Case 75 | 17 | 72,588,388 | 72,725,864 | 3 | 0 | 3 | 1 |
| Case 75 | 17 | 72,730,234 | 72,745,227 | 2 | 0 | 2 | 1 |
| Case 75 | 17 | 72,745,417 | 73,126,866 | 3 | 0 | 3 | 1 |
| Case 75 | 17 | 73,126,913 | 73,206,008 | 2 | 0 | 2 | 1 |
| Case 75 | 17 | 73,209,185 | 73,847,719 | 3 | 0 | 3 | 1 |
| Case 75 | 17 | 73,863,929 | 73,888,806 | 2 | 0 | 2 | 1 |
| Case 75 | 17 | 73,888,898 | 74,005,981 | 3 | 0 | 3 | 1 |
| Case 75 | 17 | 74,006,189 | 74,015,697 | 2 | 0 | 2 | 1 |
| Case 75 | 17 | 74,018,597 | 74,290,008 | 3 | 0 | 3 | 1 |
| Case 75 | 17 | 74,293,099 | 74,382,199 | 2 | 0 | 2 | 1 |
| Case 75 | 17 | 74,382,312 | 74,421,483 | 3 | 0 | 3 | 1 |
| Case 75 | 17 | 74,434,003 | 74,470,523 | 2 | 0 | 2 | 1 |
| Case 75 | 17 | 74,471,150 | 78,163,589 | 3 | 0 | 3 | 1 |
| Case 75 | 17 | 78,164,021 | 78,182,048 | 2 | 0 | 2 | 1 |
| Case 75 | 17 | 78,182,418 | 79,093,324 | 3 | 0 | 3 | 1 |
| Case 75 | 17 | 79,094,122 | 79,098,176 | 2 | 0 | 2 | 1 |
| Case 75 | 17 | 79,098,773 | 79,169,670 | 3 | 0 | 3 | 1 |
| Case 75 | 17 | 79,169,727 | 79,175,116 | 2 | 0 | 2 | 1 |
| Case 75 | 17 | 79,176,071 | 79,212,078 | 3 | 0 | 3 | 1 |
| Case 75 | 17 | 79,218,120 | 79,226,264 | 2 | 0 | 2 | 1 |
| Case 75 | 17 | 79,226,340 | 79,268,234 | 3 | 0 | 3 | 1 |
| Case 75 | 17 | 79,276,507 | 79,632,611 | 2 | 0 | 2 | 1 |
| Case 75 | 17 | 79,634,774 | 79,891,184 | 3 | 0 | 3 | 1 |
| Case 75 | 17 | 79,892,802 | 79,923,718 | 2 | 0 | 2 | 1 |
| Case 75 | 17 | 79,924,431 | 80,158,852 | 3 | 0 | 3 | 1 |
| Case 75 | 17 | 80,159,403 | 80,195,464 | 2 | 0 | 2 | 1 |
| Case 75 | 17 | 80,195,578 | 80,356,167 | 3 | 0 | 3 | 1 |
| Case 75 | 17 | 80,361,844 | 80,400,755 | 2 | 0 | 2 | 1 |
| Case 75 | 17 | 80,401,903 | 80,524,358 | 3 | 0 | 3 | 1 |
| Case 75 | 17 | 80,529,568 | 80,544,065 | 2 | 0 | 2 | 1 |
| Case 75 | 17 | 80,544,855 | 81,060,040 | 3 | 0 | 3 | 1 |
| Case 75 | 18 | 87,505     | 673,789    | 3 | 2 | 5 | 0 |
| Case 75 | 18 | 673,995    | 1,741,653  | 4 | 2 | 6 | 0 |

|         |    |            |            |   |   |   |   |
|---------|----|------------|------------|---|---|---|---|
| Case 75 | 18 | 1,741,741  | 1,929,915  | 3 | 2 | 5 | 0 |
| Case 75 | 18 | 1,931,566  | 2,467,022  | 4 | 2 | 6 | 0 |
| Case 75 | 18 | 2,475,505  | 3,848,826  | 3 | 2 | 5 | 0 |
| Case 75 | 18 | 3,860,475  | 4,595,717  | 4 | 2 | 6 | 0 |
| Case 75 | 18 | 4,596,475  | 4,945,127  | 3 | 2 | 5 | 0 |
| Case 75 | 18 | 4,946,422  | 5,288,695  | 4 | 2 | 6 | 0 |
| Case 75 | 18 | 5,290,198  | 14,106,385 | 3 | 2 | 5 | 0 |
| Case 75 | 18 | 14,110,916 | 14,988,113 | 4 | 2 | 6 | 0 |
| Case 75 | 18 | 14,994,970 | 15,375,878 | 3 | 2 | 5 | 0 |
| Case 75 | 18 | 18,520,354 | 27,368,785 | 2 | 2 | 4 | 0 |
| Case 75 | 18 | 27,372,273 | 28,934,293 | 2 | 0 | 2 | 1 |
| Case 75 | 18 | 28,934,359 | 28,935,694 | 3 | 0 | 3 | 1 |
| Case 75 | 18 | 28,936,574 | 28,992,798 | 2 | 0 | 2 | 1 |
| Case 75 | 18 | 28,992,801 | 28,995,493 | 3 | 0 | 3 | 1 |
| Case 75 | 18 | 29,009,409 | 29,122,267 | 2 | 0 | 2 | 1 |
| Case 75 | 18 | 29,122,565 | 29,190,174 | 3 | 0 | 3 | 1 |
| Case 75 | 18 | 29,193,385 | 29,731,080 | 2 | 0 | 2 | 1 |
| Case 75 | 18 | 29,739,230 | 29,920,430 | 3 | 0 | 3 | 1 |
| Case 75 | 18 | 29,930,576 | 30,069,667 | 2 | 0 | 2 | 1 |
| Case 75 | 18 | 30,073,995 | 30,113,132 | 3 | 0 | 3 | 1 |
| Case 75 | 18 | 30,114,188 | 30,295,210 | 2 | 0 | 2 | 1 |
| Case 75 | 18 | 30,301,145 | 30,469,073 | 3 | 0 | 3 | 1 |
| Case 75 | 18 | 30,470,148 | 31,319,905 | 2 | 0 | 2 | 1 |
| Case 75 | 18 | 31,319,947 | 31,374,094 | 3 | 0 | 3 | 1 |
| Case 75 | 18 | 31,386,616 | 32,312,012 | 2 | 0 | 2 | 1 |
| Case 75 | 18 | 32,316,174 | 32,487,955 | 3 | 0 | 3 | 1 |
| Case 75 | 18 | 32,503,478 | 32,701,540 | 2 | 0 | 2 | 1 |
| Case 75 | 18 | 32,707,332 | 32,815,683 | 3 | 0 | 3 | 1 |
| Case 75 | 18 | 32,822,382 | 33,004,855 | 2 | 0 | 2 | 1 |
| Case 75 | 18 | 33,009,348 | 33,104,984 | 3 | 0 | 3 | 1 |
| Case 75 | 18 | 33,105,717 | 33,145,747 | 2 | 0 | 2 | 1 |
| Case 75 | 18 | 33,152,621 | 33,188,570 | 3 | 0 | 3 | 1 |
| Case 75 | 18 | 33,191,702 | 33,747,114 | 2 | 0 | 2 | 1 |
| Case 75 | 18 | 33,749,871 | 33,908,232 | 3 | 0 | 3 | 1 |
| Case 75 | 18 | 33,910,602 | 33,945,771 | 2 | 0 | 2 | 1 |
| Case 75 | 18 | 33,946,452 | 34,183,939 | 3 | 0 | 3 | 1 |
| Case 75 | 18 | 34,184,093 | 34,258,129 | 2 | 0 | 2 | 1 |
| Case 75 | 18 | 34,261,473 | 34,408,318 | 3 | 0 | 3 | 1 |
| Case 75 | 18 | 34,408,423 | 34,830,797 | 2 | 0 | 2 | 1 |
| Case 75 | 18 | 34,830,966 | 35,453,385 | 3 | 0 | 3 | 1 |
| Case 75 | 18 | 35,464,488 | 35,515,421 | 2 | 0 | 2 | 1 |
| Case 75 | 18 | 35,525,733 | 35,717,578 | 3 | 0 | 3 | 1 |
| Case 75 | 18 | 35,719,478 | 35,993,025 | 2 | 0 | 2 | 1 |
| Case 75 | 18 | 35,993,421 | 36,153,889 | 3 | 0 | 3 | 1 |
| Case 75 | 18 | 36,160,017 | 42,200,964 | 2 | 0 | 2 | 1 |
| Case 75 | 18 | 42,203,453 | 42,669,611 | 3 | 0 | 3 | 1 |
| Case 75 | 18 | 42,674,461 | 42,810,653 | 2 | 0 | 2 | 1 |
| Case 75 | 18 | 42,819,590 | 43,013,976 | 3 | 0 | 3 | 1 |
| Case 75 | 18 | 43,019,310 | 43,036,893 | 2 | 0 | 2 | 1 |
| Case 75 | 18 | 43,038,800 | 43,438,156 | 3 | 0 | 3 | 1 |
| Case 75 | 18 | 43,438,555 | 43,833,689 | 2 | 0 | 2 | 1 |
| Case 75 | 18 | 43,834,634 | 44,133,946 | 3 | 0 | 3 | 1 |
| Case 75 | 18 | 44,134,163 | 44,136,167 | 2 | 0 | 2 | 1 |
| Case 75 | 18 | 44,137,400 | 44,335,724 | 3 | 0 | 3 | 1 |
| Case 75 | 18 | 44,337,686 | 44,451,644 | 2 | 0 | 2 | 1 |
| Case 75 | 18 | 44,470,697 | 44,572,437 | 3 | 0 | 3 | 1 |
| Case 75 | 18 | 44,576,566 | 44,745,056 | 2 | 0 | 2 | 1 |
| Case 75 | 18 | 44,746,997 | 44,908,097 | 3 | 0 | 3 | 1 |
| Case 75 | 18 | 44,918,564 | 45,011,640 | 2 | 0 | 2 | 1 |
| Case 75 | 18 | 45,014,251 | 45,283,049 | 3 | 0 | 3 | 1 |
| Case 75 | 18 | 45,285,683 | 45,425,478 | 2 | 0 | 2 | 1 |

|         |    |            |            |   |   |   |   |
|---------|----|------------|------------|---|---|---|---|
| Case 75 | 18 | 45,432,593 | 46,618,828 | 3 | 0 | 3 | 1 |
| Case 75 | 18 | 46,623,780 | 47,010,098 | 2 | 0 | 2 | 1 |
| Case 75 | 18 | 47,013,313 | 47,763,296 | 3 | 0 | 3 | 1 |
| Case 75 | 18 | 47,765,007 | 47,791,995 | 2 | 0 | 2 | 1 |
| Case 75 | 18 | 47,795,073 | 47,833,405 | 3 | 0 | 3 | 1 |
| Case 75 | 18 | 47,837,090 | 47,918,555 | 2 | 0 | 2 | 1 |
| Case 75 | 18 | 47,918,639 | 48,445,498 | 3 | 0 | 3 | 1 |
| Case 75 | 18 | 48,446,899 | 48,510,795 | 2 | 0 | 2 | 1 |
| Case 75 | 18 | 48,510,843 | 49,013,731 | 3 | 0 | 3 | 1 |
| Case 75 | 18 | 49,014,615 | 49,284,829 | 2 | 0 | 2 | 1 |
| Case 75 | 18 | 49,288,934 | 49,450,206 | 3 | 0 | 3 | 1 |
| Case 75 | 18 | 49,452,887 | 49,745,633 | 2 | 0 | 2 | 1 |
| Case 75 | 18 | 49,746,452 | 49,802,282 | 3 | 0 | 3 | 1 |
| Case 75 | 18 | 49,804,768 | 50,647,803 | 2 | 0 | 2 | 1 |
| Case 75 | 18 | 50,668,321 | 50,706,490 | 3 | 0 | 3 | 1 |
| Case 75 | 18 | 50,711,414 | 51,506,899 | 2 | 0 | 2 | 1 |
| Case 75 | 18 | 51,511,484 | 51,763,722 | 3 | 0 | 3 | 1 |
| Case 75 | 18 | 51,765,409 | 51,916,563 | 2 | 0 | 2 | 1 |
| Case 75 | 18 | 51,933,016 | 52,265,365 | 3 | 0 | 3 | 1 |
| Case 75 | 18 | 52,268,629 | 53,577,346 | 2 | 0 | 2 | 1 |
| Case 75 | 18 | 53,577,888 | 53,801,501 | 3 | 0 | 3 | 1 |
| Case 75 | 18 | 53,801,555 | 53,950,927 | 2 | 0 | 2 | 1 |
| Case 75 | 18 | 53,961,793 | 54,042,206 | 3 | 0 | 3 | 1 |
| Case 75 | 18 | 54,049,240 | 54,129,063 | 2 | 0 | 2 | 1 |
| Case 75 | 18 | 54,136,314 | 54,430,878 | 3 | 0 | 3 | 1 |
| Case 75 | 18 | 54,435,784 | 54,693,531 | 2 | 0 | 2 | 1 |
| Case 75 | 18 | 54,694,151 | 55,267,013 | 3 | 0 | 3 | 1 |
| Case 75 | 18 | 55,268,486 | 55,315,959 | 2 | 0 | 2 | 1 |
| Case 75 | 18 | 55,317,121 | 55,661,297 | 3 | 0 | 3 | 1 |
| Case 75 | 18 | 55,661,823 | 55,732,192 | 2 | 0 | 2 | 1 |
| Case 75 | 18 | 55,740,404 | 56,331,663 | 3 | 0 | 3 | 1 |
| Case 75 | 18 | 56,337,296 | 56,424,837 | 2 | 0 | 2 | 1 |
| Case 75 | 18 | 56,437,043 | 56,792,467 | 3 | 0 | 3 | 1 |
| Case 75 | 18 | 56,792,629 | 56,852,972 | 2 | 0 | 2 | 1 |
| Case 75 | 18 | 56,855,621 | 56,998,735 | 3 | 0 | 3 | 1 |
| Case 75 | 18 | 57,000,333 | 57,130,300 | 2 | 0 | 2 | 1 |
| Case 75 | 18 | 57,130,979 | 57,138,042 | 3 | 0 | 3 | 1 |
| Case 75 | 18 | 57,138,957 | 57,181,744 | 2 | 0 | 2 | 1 |
| Case 75 | 18 | 57,182,339 | 57,246,293 | 3 | 0 | 3 | 1 |
| Case 75 | 18 | 57,250,357 | 57,308,614 | 2 | 0 | 2 | 1 |
| Case 75 | 18 | 57,309,059 | 57,600,966 | 3 | 0 | 3 | 1 |
| Case 75 | 18 | 57,601,545 | 58,037,433 | 2 | 0 | 2 | 1 |
| Case 75 | 18 | 58,038,332 | 58,040,587 | 3 | 0 | 3 | 1 |
| Case 75 | 18 | 58,049,192 | 58,764,375 | 2 | 0 | 2 | 1 |
| Case 75 | 18 | 58,765,118 | 59,068,854 | 3 | 0 | 3 | 1 |
| Case 75 | 18 | 59,071,499 | 59,330,019 | 2 | 0 | 2 | 1 |
| Case 75 | 18 | 59,330,196 | 59,579,209 | 3 | 0 | 3 | 1 |
| Case 75 | 18 | 59,580,679 | 59,587,460 | 2 | 0 | 2 | 1 |
| Case 75 | 18 | 59,588,876 | 59,698,641 | 3 | 0 | 3 | 1 |
| Case 75 | 18 | 59,701,010 | 59,984,822 | 2 | 0 | 2 | 1 |
| Case 75 | 18 | 59,997,434 | 60,525,392 | 3 | 0 | 3 | 1 |
| Case 75 | 18 | 60,526,902 | 60,647,072 | 2 | 0 | 2 | 1 |
| Case 75 | 18 | 60,648,872 | 61,013,905 | 3 | 0 | 3 | 1 |
| Case 75 | 18 | 61,022,115 | 61,170,694 | 2 | 0 | 2 | 1 |
| Case 75 | 18 | 61,170,721 | 61,264,298 | 3 | 0 | 3 | 1 |
| Case 75 | 18 | 61,264,468 | 67,557,429 | 2 | 0 | 2 | 1 |
| Case 75 | 18 | 67,559,343 | 67,566,587 | 3 | 0 | 3 | 1 |
| Case 75 | 18 | 67,568,145 | 67,866,734 | 2 | 0 | 2 | 1 |
| Case 75 | 18 | 67,867,663 | 68,096,748 | 3 | 0 | 3 | 1 |
| Case 75 | 18 | 68,103,850 | 68,361,177 | 2 | 0 | 2 | 1 |
| Case 75 | 18 | 68,365,793 | 68,459,549 | 3 | 0 | 3 | 1 |



|         |    |            |            |   |   |   |   |
|---------|----|------------|------------|---|---|---|---|
| Case 75 | 18 | 68,460,065 | 71,065,781 | 2 | 0 | 2 | 1 |
| Case 75 | 18 | 71,066,275 | 71,074,190 | 3 | 0 | 3 | 1 |
| Case 75 | 18 | 71,075,349 | 71,494,718 | 2 | 0 | 2 | 1 |
| Case 75 | 18 | 71,496,928 | 71,637,988 | 3 | 0 | 3 | 1 |
| Case 75 | 18 | 71,642,414 | 71,796,790 | 2 | 0 | 2 | 1 |
| Case 75 | 18 | 71,805,503 | 71,948,257 | 3 | 0 | 3 | 1 |
| Case 75 | 18 | 71,953,358 | 72,022,671 | 2 | 0 | 2 | 1 |
| Case 75 | 18 | 72,031,142 | 72,256,617 | 3 | 0 | 3 | 1 |
| Case 75 | 18 | 72,258,127 | 72,744,475 | 2 | 0 | 2 | 1 |
| Case 75 | 18 | 72,763,025 | 73,259,510 | 3 | 0 | 3 | 1 |
| Case 75 | 18 | 73,267,453 | 73,330,240 | 2 | 0 | 2 | 1 |
| Case 75 | 18 | 73,332,539 | 73,526,297 | 3 | 0 | 3 | 1 |
| Case 75 | 18 | 73,526,880 | 73,752,174 | 2 | 0 | 2 | 1 |
| Case 75 | 18 | 73,752,499 | 73,937,542 | 3 | 0 | 3 | 1 |
| Case 75 | 18 | 73,950,261 | 74,033,720 | 2 | 0 | 2 | 1 |
| Case 75 | 18 | 74,036,095 | 74,348,916 | 3 | 0 | 3 | 1 |
| Case 75 | 18 | 74,351,381 | 74,625,763 | 2 | 0 | 2 | 1 |
| Case 75 | 18 | 74,625,806 | 74,930,541 | 3 | 0 | 3 | 1 |
| Case 75 | 18 | 74,931,463 | 74,954,315 | 2 | 0 | 2 | 1 |
| Case 75 | 18 | 74,954,477 | 75,072,931 | 3 | 0 | 3 | 1 |
| Case 75 | 18 | 75,073,346 | 75,577,219 | 2 | 0 | 2 | 1 |
| Case 75 | 18 | 75,578,926 | 75,930,831 | 3 | 0 | 3 | 1 |
| Case 75 | 18 | 75,933,383 | 76,034,737 | 2 | 0 | 2 | 1 |
| Case 75 | 18 | 76,039,684 | 76,086,818 | 3 | 0 | 3 | 1 |
| Case 75 | 18 | 76,089,528 | 76,153,361 | 2 | 0 | 2 | 1 |
| Case 75 | 18 | 76,154,754 | 76,526,710 | 3 | 0 | 3 | 1 |
| Case 75 | 18 | 76,528,007 | 76,566,129 | 2 | 0 | 2 | 1 |
| Case 75 | 18 | 76,570,960 | 76,664,863 | 3 | 0 | 3 | 1 |
| Case 75 | 18 | 76,665,175 | 76,754,200 | 2 | 0 | 2 | 1 |
| Case 75 | 18 | 76,754,380 | 76,817,189 | 3 | 0 | 3 | 1 |
| Case 75 | 18 | 76,820,697 | 77,122,830 | 2 | 0 | 2 | 1 |
| Case 75 | 18 | 77,129,563 | 77,708,781 | 3 | 0 | 3 | 1 |
| Case 75 | 18 | 77,708,992 | 78,015,180 | 2 | 0 | 2 | 1 |
| Case 75 | 19 | 260,912    | 422,283    | 3 | 0 | 3 | 1 |
| Case 75 | 19 | 428,608    | 582,775    | 2 | 0 | 2 | 1 |
| Case 75 | 19 | 582,927    | 682,010    | 3 | 0 | 3 | 1 |
| Case 75 | 19 | 683,221    | 758,121    | 2 | 0 | 2 | 1 |
| Case 75 | 19 | 758,174    | 824,168    | 3 | 0 | 3 | 1 |
| Case 75 | 19 | 827,655    | 889,821    | 2 | 0 | 2 | 1 |
| Case 75 | 19 | 891,008    | 1,043,794  | 3 | 0 | 3 | 1 |
| Case 75 | 19 | 1,044,589  | 1,056,244  | 2 | 0 | 2 | 1 |
| Case 75 | 19 | 1,056,389  | 1,119,539  | 3 | 0 | 3 | 1 |
| Case 75 | 19 | 1,119,540  | 1,234,255  | 2 | 0 | 2 | 1 |
| Case 75 | 19 | 1,234,617  | 1,399,792  | 3 | 0 | 3 | 1 |
| Case 75 | 19 | 1,399,892  | 1,562,643  | 2 | 0 | 2 | 1 |
| Case 75 | 19 | 1,576,073  | 1,821,637  | 3 | 0 | 3 | 1 |
| Case 75 | 19 | 1,822,668  | 1,916,392  | 2 | 0 | 2 | 1 |
| Case 75 | 19 | 1,917,925  | 2,028,985  | 3 | 0 | 3 | 1 |
| Case 75 | 19 | 2,032,148  | 2,059,585  | 2 | 0 | 2 | 1 |
| Case 75 | 19 | 2,061,715  | 2,246,770  | 3 | 0 | 3 | 1 |
| Case 75 | 19 | 2,248,683  | 2,290,977  | 2 | 0 | 2 | 1 |
| Case 75 | 19 | 2,294,279  | 2,415,448  | 3 | 0 | 3 | 1 |
| Case 75 | 19 | 2,415,704  | 2,430,232  | 2 | 0 | 2 | 1 |
| Case 75 | 19 | 2,431,272  | 2,515,874  | 3 | 0 | 3 | 1 |
| Case 75 | 19 | 2,517,875  | 2,569,242  | 2 | 0 | 2 | 1 |
| Case 75 | 19 | 2,569,946  | 2,834,614  | 3 | 0 | 3 | 1 |
| Case 75 | 19 | 2,834,783  | 2,863,877  | 2 | 0 | 2 | 1 |
| Case 75 | 19 | 2,867,717  | 2,936,535  | 3 | 0 | 3 | 1 |
| Case 75 | 19 | 2,936,559  | 2,993,524  | 2 | 0 | 2 | 1 |
| Case 75 | 19 | 2,993,562  | 3,488,180  | 3 | 0 | 3 | 1 |
| Case 75 | 19 | 3,488,287  | 3,548,231  | 2 | 0 | 2 | 1 |

|         |    |            |            |   |   |   |   |
|---------|----|------------|------------|---|---|---|---|
| Case 75 | 19 | 3,548,313  | 3,736,255  | 3 | 0 | 3 | 1 |
| Case 75 | 19 | 3,736,284  | 3,740,740  | 2 | 0 | 2 | 1 |
| Case 75 | 19 | 3,743,948  | 3,753,769  | 3 | 0 | 3 | 1 |
| Case 75 | 19 | 3,753,807  | 3,822,179  | 2 | 0 | 2 | 1 |
| Case 75 | 19 | 3,825,330  | 4,298,064  | 3 | 0 | 3 | 1 |
| Case 75 | 19 | 4,298,067  | 4,312,103  | 2 | 0 | 2 | 1 |
| Case 75 | 19 | 4,318,365  | 4,493,708  | 3 | 0 | 3 | 1 |
| Case 75 | 19 | 4,493,979  | 4,508,817  | 2 | 0 | 2 | 1 |
| Case 75 | 19 | 4,508,905  | 5,355,661  | 3 | 0 | 3 | 1 |
| Case 75 | 19 | 5,359,211  | 5,456,401  | 2 | 0 | 2 | 1 |
| Case 75 | 19 | 5,456,450  | 5,831,515  | 3 | 0 | 3 | 1 |
| Case 75 | 19 | 5,831,525  | 5,831,525  | 2 | 0 | 2 | 1 |
| Case 75 | 19 | 5,832,190  | 5,841,356  | 0 | 0 | 0 | 0 |
| Case 75 | 19 | 5,843,609  | 5,843,609  | 2 | 0 | 2 | 1 |
| Case 75 | 19 | 5,844,400  | 7,081,431  | 3 | 0 | 3 | 1 |
| Case 75 | 19 | 7,082,035  | 7,088,834  | 2 | 0 | 2 | 1 |
| Case 75 | 19 | 7,090,222  | 7,570,958  | 3 | 0 | 3 | 1 |
| Case 75 | 19 | 7,570,978  | 7,573,287  | 2 | 0 | 2 | 1 |
| Case 75 | 19 | 7,574,918  | 7,852,337  | 3 | 0 | 3 | 1 |
| Case 75 | 19 | 7,855,781  | 7,898,541  | 2 | 0 | 2 | 1 |
| Case 75 | 19 | 7,900,562  | 8,071,111  | 3 | 0 | 3 | 1 |
| Case 75 | 19 | 8,106,521  | 8,160,897  | 2 | 0 | 2 | 1 |
| Case 75 | 19 | 8,160,947  | 8,913,668  | 3 | 0 | 3 | 1 |
| Case 75 | 19 | 8,920,947  | 8,962,389  | 2 | 0 | 2 | 1 |
| Case 75 | 19 | 8,966,475  | 9,297,196  | 3 | 0 | 3 | 1 |
| Case 75 | 19 | 9,297,286  | 9,921,593  | 2 | 0 | 2 | 1 |
| Case 75 | 19 | 9,921,613  | 10,904,700 | 3 | 0 | 3 | 1 |
| Case 75 | 19 | 10,908,100 | 10,953,603 | 2 | 0 | 2 | 1 |
| Case 75 | 19 | 10,955,925 | 11,217,344 | 3 | 0 | 3 | 1 |
| Case 75 | 19 | 11,218,079 | 20,003,341 | 2 | 2 | 4 | 0 |
| Case 75 | 19 | 20,003,485 | 20,129,877 | 4 | 2 | 6 | 0 |
| Case 75 | 19 | 20,133,846 | 20,470,564 | 3 | 2 | 5 | 0 |
| Case 75 | 19 | 20,473,553 | 24,629,285 | 2 | 2 | 4 | 0 |
| Case 75 | 19 | 27,732,159 | 27,763,440 | 2 | 2 | 4 | 0 |
| Case 75 | 19 | 27,801,814 | 28,036,744 | 6 | 1 | 7 | 0 |
| Case 75 | 19 | 28,054,130 | 28,246,742 | 2 | 2 | 4 | 0 |
| Case 75 | 19 | 28,252,131 | 29,348,066 | 6 | 1 | 7 | 0 |
| Case 75 | 19 | 29,348,082 | 29,554,195 | 5 | 1 | 6 | 0 |
| Case 75 | 19 | 29,556,972 | 30,037,081 | 6 | 1 | 7 | 0 |
| Case 75 | 19 | 30,039,592 | 30,071,417 | 2 | 2 | 4 | 0 |
| Case 75 | 19 | 30,077,328 | 30,914,411 | 6 | 1 | 7 | 0 |
| Case 75 | 19 | 30,920,536 | 34,266,248 | 2 | 2 | 4 | 0 |
| Case 75 | 19 | 34,271,079 | 34,431,865 | 3 | 2 | 5 | 0 |
| Case 75 | 19 | 34,436,889 | 44,071,408 | 2 | 2 | 4 | 0 |
| Case 75 | 19 | 44,072,802 | 44,280,715 | 3 | 2 | 5 | 0 |
| Case 75 | 19 | 44,280,719 | 45,574,894 | 2 | 2 | 4 | 0 |
| Case 75 | 19 | 45,575,251 | 45,708,758 | 3 | 2 | 5 | 0 |
| Case 75 | 19 | 45,716,197 | 50,020,163 | 2 | 2 | 4 | 0 |
| Case 75 | 19 | 50,027,765 | 50,492,564 | 3 | 0 | 3 | 1 |
| Case 75 | 19 | 50,492,971 | 50,548,191 | 2 | 0 | 2 | 1 |
| Case 75 | 19 | 50,548,367 | 50,591,699 | 3 | 0 | 3 | 1 |
| Case 75 | 19 | 50,648,319 | 50,880,867 | 5 | 0 | 5 | 1 |
| Case 75 | 19 | 50,881,054 | 51,485,056 | 3 | 0 | 3 | 1 |
| Case 75 | 19 | 51,485,072 | 51,519,354 | 2 | 0 | 2 | 1 |
| Case 75 | 19 | 51,519,380 | 51,534,048 | 3 | 0 | 3 | 1 |
| Case 75 | 19 | 51,535,130 | 51,582,808 | 2 | 0 | 2 | 1 |
| Case 75 | 19 | 51,582,867 | 51,850,767 | 3 | 0 | 3 | 1 |
| Case 75 | 19 | 51,853,352 | 51,857,738 | 2 | 0 | 2 | 1 |
| Case 75 | 19 | 51,857,774 | 52,385,520 | 3 | 0 | 3 | 1 |
| Case 75 | 19 | 52,386,723 | 52,447,841 | 2 | 0 | 2 | 1 |
| Case 75 | 19 | 52,448,196 | 52,491,250 | 3 | 0 | 3 | 1 |

|         |    |            |            |   |   |   |   |
|---------|----|------------|------------|---|---|---|---|
| Case 75 | 19 | 52,495,380 | 52,678,171 | 2 | 0 | 2 | 1 |
| Case 75 | 19 | 52,679,063 | 52,793,328 | 3 | 0 | 3 | 1 |
| Case 75 | 19 | 52,793,388 | 53,482,629 | 2 | 0 | 2 | 1 |
| Case 75 | 19 | 53,483,547 | 53,569,251 | 3 | 0 | 3 | 1 |
| Case 75 | 19 | 53,570,867 | 53,573,403 | 2 | 0 | 2 | 1 |
| Case 75 | 19 | 53,573,417 | 53,602,953 | 3 | 0 | 3 | 1 |
| Case 75 | 19 | 53,603,590 | 53,756,120 | 2 | 0 | 2 | 1 |
| Case 75 | 19 | 53,757,505 | 53,818,436 | 3 | 0 | 3 | 1 |
| Case 75 | 19 | 53,820,000 | 53,968,383 | 2 | 0 | 2 | 1 |
| Case 75 | 19 | 53,970,581 | 54,301,593 | 3 | 0 | 3 | 1 |
| Case 75 | 19 | 54,301,639 | 54,313,957 | 2 | 0 | 2 | 1 |
| Case 75 | 19 | 54,313,961 | 55,107,870 | 3 | 0 | 3 | 1 |
| Case 75 | 19 | 55,109,883 | 55,143,209 | 2 | 0 | 2 | 1 |
| Case 75 | 19 | 55,143,452 | 55,383,941 | 3 | 0 | 3 | 1 |
| Case 75 | 19 | 55,385,435 | 55,412,835 | 2 | 0 | 2 | 1 |
| Case 75 | 19 | 55,417,731 | 55,871,019 | 3 | 0 | 3 | 1 |
| Case 75 | 19 | 55,871,205 | 55,889,485 | 2 | 0 | 2 | 1 |
| Case 75 | 19 | 55,889,500 | 56,918,598 | 3 | 0 | 3 | 1 |
| Case 75 | 19 | 56,924,761 | 56,968,314 | 2 | 0 | 2 | 1 |
| Case 75 | 19 | 56,969,536 | 57,027,720 | 3 | 0 | 3 | 1 |
| Case 75 | 19 | 57,027,762 | 57,093,819 | 2 | 0 | 2 | 1 |
| Case 75 | 19 | 57,099,817 | 57,868,483 | 3 | 0 | 3 | 1 |
| Case 75 | 19 | 57,868,685 | 57,949,426 | 2 | 0 | 2 | 1 |
| Case 75 | 19 | 57,952,035 | 57,956,828 | 3 | 0 | 3 | 1 |
| Case 75 | 19 | 57,961,612 | 58,031,303 | 2 | 0 | 2 | 1 |
| Case 75 | 19 | 58,038,624 | 58,117,225 | 3 | 0 | 3 | 1 |
| Case 75 | 19 | 58,117,399 | 58,199,483 | 2 | 0 | 2 | 1 |
| Case 75 | 19 | 58,199,628 | 58,436,020 | 3 | 0 | 3 | 1 |
| Case 75 | 19 | 58,436,041 | 58,491,627 | 2 | 0 | 2 | 1 |
| Case 75 | 19 | 58,494,665 | 58,596,165 | 3 | 0 | 3 | 1 |
| Case 75 | 19 | 58,596,338 | 58,689,834 | 2 | 0 | 2 | 1 |
| Case 75 | 19 | 58,693,418 | 58,772,444 | 3 | 0 | 3 | 1 |
| Case 75 | 19 | 58,772,484 | 58,793,554 | 2 | 0 | 2 | 1 |
| Case 75 | 19 | 58,797,098 | 58,864,491 | 3 | 0 | 3 | 1 |
| Case 75 | 19 | 58,864,657 | 58,880,242 | 2 | 0 | 2 | 1 |
| Case 75 | 19 | 58,884,965 | 58,982,131 | 3 | 0 | 3 | 1 |
| Case 75 | 19 | 58,982,241 | 59,000,273 | 2 | 0 | 2 | 1 |
| Case 75 | 19 | 59,008,566 | 59,073,871 | 3 | 0 | 3 | 1 |
| Case 75 | 19 | 59,074,133 | 59,097,160 | 2 | 0 | 2 | 1 |
| Case 75 | 20 | 63,244     | 5,589,451  | 3 | 2 | 5 | 0 |
| Case 75 | 20 | 5,597,276  | 5,731,955  | 4 | 2 | 6 | 0 |
| Case 75 | 20 | 5,738,221  | 6,114,257  | 3 | 2 | 5 | 0 |
| Case 75 | 20 | 6,115,581  | 6,274,464  | 4 | 2 | 6 | 0 |
| Case 75 | 20 | 6,277,097  | 6,764,536  | 3 | 2 | 5 | 0 |
| Case 75 | 20 | 6,765,841  | 7,065,143  | 4 | 2 | 6 | 0 |
| Case 75 | 20 | 7,067,157  | 7,955,347  | 3 | 2 | 5 | 0 |
| Case 75 | 20 | 7,957,766  | 8,168,483  | 4 | 2 | 6 | 0 |
| Case 75 | 20 | 8,173,394  | 8,875,889  | 3 | 2 | 5 | 0 |
| Case 75 | 20 | 8,877,989  | 9,459,927  | 4 | 2 | 6 | 0 |
| Case 75 | 20 | 9,462,537  | 10,123,424 | 3 | 2 | 5 | 0 |
| Case 75 | 20 | 10,129,600 | 10,418,801 | 4 | 2 | 6 | 0 |
| Case 75 | 20 | 10,424,721 | 11,179,048 | 3 | 2 | 5 | 0 |
| Case 75 | 20 | 11,179,758 | 11,371,883 | 4 | 2 | 6 | 0 |
| Case 75 | 20 | 11,372,915 | 13,907,164 | 3 | 2 | 5 | 0 |
| Case 75 | 20 | 13,908,548 | 14,390,613 | 4 | 2 | 6 | 0 |
| Case 75 | 20 | 14,392,173 | 14,968,542 | 3 | 2 | 5 | 0 |
| Case 75 | 20 | 14,973,777 | 15,104,193 | 4 | 2 | 6 | 0 |
| Case 75 | 20 | 15,105,055 | 15,613,056 | 3 | 2 | 5 | 0 |
| Case 75 | 20 | 15,613,161 | 15,893,592 | 4 | 2 | 6 | 0 |
| Case 75 | 20 | 15,898,812 | 16,054,623 | 3 | 2 | 5 | 0 |
| Case 75 | 20 | 16,055,272 | 16,202,021 | 4 | 2 | 6 | 0 |

|         |    |            |            |   |   |   |   |
|---------|----|------------|------------|---|---|---|---|
| Case 75 | 20 | 16,202,670 | 16,572,601 | 3 | 2 | 5 | 0 |
| Case 75 | 20 | 16,575,342 | 16,659,448 | 4 | 2 | 6 | 0 |
| Case 75 | 20 | 16,659,902 | 17,262,715 | 3 | 2 | 5 | 0 |
| Case 75 | 20 | 17,262,999 | 17,472,515 | 4 | 2 | 6 | 0 |
| Case 75 | 20 | 17,473,671 | 19,727,485 | 3 | 2 | 5 | 0 |
| Case 75 | 20 | 19,728,654 | 19,915,251 | 4 | 2 | 6 | 0 |
| Case 75 | 20 | 19,915,770 | 22,142,595 | 3 | 2 | 5 | 0 |
| Case 75 | 20 | 22,147,525 | 22,485,322 | 4 | 2 | 6 | 0 |
| Case 75 | 20 | 22,487,988 | 26,293,985 | 3 | 2 | 5 | 0 |
| Case 75 | 20 | 29,425,357 | 30,486,338 | 3 | 3 | 6 | 0 |
| Case 75 | 20 | 30,489,670 | 30,489,670 | 5 | 2 | 7 | 0 |
| Case 75 | 20 | 30,496,398 | 31,032,286 | 3 | 2 | 5 | 0 |
| Case 75 | 20 | 31,033,574 | 34,025,983 | 3 | 3 | 6 | 0 |
| Case 75 | 20 | 34,042,646 | 34,067,227 | 4 | 1 | 5 | 0 |
| Case 75 | 20 | 34,075,998 | 34,146,779 | 4 | 2 | 6 | 0 |
| Case 75 | 20 | 34,152,782 | 34,288,536 | 3 | 2 | 5 | 0 |
| Case 75 | 20 | 34,288,854 | 43,780,908 | 3 | 3 | 6 | 0 |
| Case 75 | 20 | 43,786,064 | 43,793,512 | 5 | 2 | 7 | 0 |
| Case 75 | 20 | 43,803,606 | 43,882,794 | 3 | 2 | 5 | 0 |
| Case 75 | 20 | 43,882,800 | 51,867,856 | 3 | 3 | 6 | 0 |
| Case 75 | 20 | 51,869,389 | 51,876,653 | 3 | 2 | 5 | 0 |
| Case 75 | 20 | 51,879,861 | 56,083,837 | 3 | 3 | 6 | 0 |
| Case 75 | 20 | 56,087,796 | 56,191,351 | 3 | 2 | 5 | 0 |
| Case 75 | 20 | 56,191,360 | 58,476,862 | 3 | 3 | 6 | 0 |
| Case 75 | 20 | 58,486,796 | 58,502,648 | 5 | 2 | 7 | 0 |
| Case 75 | 20 | 58,511,286 | 58,581,768 | 3 | 2 | 5 | 0 |
| Case 75 | 20 | 58,581,873 | 60,673,065 | 3 | 3 | 6 | 0 |
| Case 75 | 20 | 60,681,037 | 60,681,037 | 5 | 2 | 7 | 0 |
| Case 75 | 20 | 60,683,359 | 60,793,712 | 3 | 2 | 5 | 0 |
| Case 75 | 20 | 60,797,558 | 61,450,599 | 3 | 3 | 6 | 0 |
| Case 75 | 20 | 61,451,305 | 61,451,333 | 5 | 2 | 7 | 0 |
| Case 75 | 20 | 61,453,127 | 61,578,610 | 3 | 2 | 5 | 0 |
| Case 75 | 20 | 61,582,757 | 62,565,622 | 3 | 3 | 6 | 0 |
| Case 75 | 20 | 62,568,408 | 62,571,356 | 5 | 2 | 7 | 0 |
| Case 75 | 20 | 62,573,064 | 62,948,788 | 3 | 2 | 5 | 0 |
| Case 75 | 21 | 10,827,533 | 10,971,337 | 3 | 0 | 3 | 1 |
| Case 75 | 21 | 14,368,320 | 15,207,860 | 3 | 0 | 3 | 1 |
| Case 75 | 21 | 15,214,708 | 15,375,507 | 2 | 0 | 2 | 1 |
| Case 75 | 21 | 15,384,814 | 15,495,000 | 3 | 0 | 3 | 1 |
| Case 75 | 21 | 15,501,522 | 18,781,682 | 2 | 0 | 2 | 1 |
| Case 75 | 21 | 18,785,657 | 18,951,211 | 3 | 0 | 3 | 1 |
| Case 75 | 21 | 18,951,922 | 19,044,975 | 2 | 0 | 2 | 1 |
| Case 75 | 21 | 19,046,753 | 19,169,013 | 3 | 0 | 3 | 1 |
| Case 75 | 21 | 19,169,133 | 19,259,311 | 2 | 0 | 2 | 1 |
| Case 75 | 21 | 19,260,617 | 19,317,046 | 3 | 0 | 3 | 1 |
| Case 75 | 21 | 19,321,203 | 27,075,005 | 2 | 0 | 2 | 1 |
| Case 75 | 21 | 27,078,296 | 27,443,650 | 3 | 0 | 3 | 1 |
| Case 75 | 21 | 27,444,110 | 27,537,769 | 2 | 0 | 2 | 1 |
| Case 75 | 21 | 27,544,041 | 27,616,787 | 3 | 0 | 3 | 1 |
| Case 75 | 21 | 27,618,726 | 28,084,748 | 2 | 0 | 2 | 1 |
| Case 75 | 21 | 28,088,340 | 28,115,929 | 3 | 0 | 3 | 1 |
| Case 75 | 21 | 28,122,146 | 28,209,494 | 2 | 0 | 2 | 1 |
| Case 75 | 21 | 28,209,667 | 28,229,786 | 3 | 0 | 3 | 1 |
| Case 75 | 21 | 28,235,194 | 28,299,990 | 2 | 0 | 2 | 1 |
| Case 75 | 21 | 28,302,335 | 28,338,425 | 3 | 0 | 3 | 1 |
| Case 75 | 21 | 28,338,449 | 28,932,087 | 2 | 0 | 2 | 1 |
| Case 75 | 21 | 28,938,429 | 28,962,313 | 3 | 0 | 3 | 1 |
| Case 75 | 21 | 28,965,787 | 30,419,544 | 2 | 0 | 2 | 1 |
| Case 75 | 21 | 30,419,555 | 30,629,752 | 3 | 0 | 3 | 1 |
| Case 75 | 21 | 30,656,199 | 30,994,121 | 2 | 0 | 2 | 1 |
| Case 75 | 21 | 30,997,433 | 31,100,797 | 3 | 0 | 3 | 1 |

|         |    |            |            |   |   |   |   |
|---------|----|------------|------------|---|---|---|---|
| Case 75 | 21 | 31,108,846 | 31,654,504 | 2 | 0 | 2 | 1 |
| Case 75 | 21 | 31,654,638 | 31,744,555 | 3 | 0 | 3 | 1 |
| Case 75 | 21 | 31,753,700 | 31,812,763 | 2 | 0 | 2 | 1 |
| Case 75 | 21 | 31,812,772 | 31,965,059 | 3 | 0 | 3 | 1 |
| Case 75 | 21 | 31,973,405 | 32,250,952 | 2 | 0 | 2 | 1 |
| Case 75 | 21 | 32,251,674 | 33,057,720 | 3 | 0 | 3 | 1 |
| Case 75 | 21 | 33,058,677 | 33,096,867 | 2 | 0 | 2 | 1 |
| Case 75 | 21 | 33,124,238 | 33,998,314 | 3 | 0 | 3 | 1 |
| Case 75 | 21 | 33,999,859 | 34,223,288 | 2 | 0 | 2 | 1 |
| Case 75 | 21 | 34,238,324 | 34,619,126 | 3 | 0 | 3 | 1 |
| Case 75 | 21 | 34,620,113 | 34,635,801 | 2 | 0 | 2 | 1 |
| Case 75 | 21 | 34,640,722 | 34,707,387 | 3 | 0 | 3 | 1 |
| Case 75 | 21 | 34,707,868 | 34,725,807 | 2 | 0 | 2 | 1 |
| Case 75 | 21 | 34,726,019 | 34,806,288 | 3 | 0 | 3 | 1 |
| Case 75 | 21 | 34,809,233 | 35,172,139 | 2 | 0 | 2 | 1 |
| Case 75 | 21 | 35,176,970 | 35,742,722 | 3 | 0 | 3 | 1 |
| Case 75 | 21 | 35,742,799 | 35,782,033 | 2 | 0 | 2 | 1 |
| Case 75 | 21 | 35,783,219 | 35,893,950 | 3 | 0 | 3 | 1 |
| Case 75 | 21 | 35,895,879 | 35,915,722 | 2 | 0 | 2 | 1 |
| Case 75 | 21 | 35,918,080 | 36,514,505 | 3 | 0 | 3 | 1 |
| Case 75 | 21 | 36,514,652 | 36,666,340 | 2 | 0 | 2 | 1 |
| Case 75 | 21 | 36,666,508 | 37,518,706 | 3 | 0 | 3 | 1 |
| Case 75 | 21 | 37,518,760 | 37,546,495 | 2 | 0 | 2 | 1 |
| Case 75 | 21 | 37,548,759 | 37,650,373 | 3 | 0 | 3 | 1 |
| Case 75 | 21 | 37,650,538 | 37,768,962 | 2 | 0 | 2 | 1 |
| Case 75 | 21 | 37,769,131 | 38,432,621 | 3 | 0 | 3 | 1 |
| Case 75 | 21 | 38,433,519 | 38,537,924 | 2 | 0 | 2 | 1 |
| Case 75 | 21 | 38,538,018 | 38,560,824 | 3 | 0 | 3 | 1 |
| Case 75 | 21 | 38,560,866 | 38,579,914 | 2 | 0 | 2 | 1 |
| Case 75 | 21 | 38,599,440 | 38,694,688 | 3 | 0 | 3 | 1 |
| Case 75 | 21 | 38,702,072 | 38,843,460 | 2 | 0 | 2 | 1 |
| Case 75 | 21 | 38,845,798 | 40,525,287 | 3 | 0 | 3 | 1 |
| Case 75 | 21 | 40,527,311 | 40,667,811 | 2 | 0 | 2 | 1 |
| Case 75 | 21 | 40,669,083 | 40,780,560 | 3 | 0 | 3 | 1 |
| Case 75 | 21 | 40,781,985 | 40,847,196 | 2 | 0 | 2 | 1 |
| Case 75 | 21 | 40,847,614 | 41,460,146 | 3 | 0 | 3 | 1 |
| Case 75 | 21 | 41,460,412 | 41,543,786 | 2 | 0 | 2 | 1 |
| Case 75 | 21 | 41,546,955 | 41,585,748 | 3 | 0 | 3 | 1 |
| Case 75 | 21 | 41,592,144 | 41,776,253 | 2 | 0 | 2 | 1 |
| Case 75 | 21 | 41,780,398 | 42,654,497 | 3 | 0 | 3 | 1 |
| Case 75 | 21 | 42,655,515 | 42,714,919 | 2 | 0 | 2 | 1 |
| Case 75 | 21 | 42,717,639 | 43,397,111 | 3 | 0 | 3 | 1 |
| Case 75 | 21 | 43,397,435 | 43,413,451 | 2 | 0 | 2 | 1 |
| Case 75 | 21 | 43,413,459 | 43,716,022 | 3 | 0 | 3 | 1 |
| Case 75 | 21 | 43,716,241 | 43,742,367 | 2 | 0 | 2 | 1 |
| Case 75 | 21 | 43,743,039 | 44,380,454 | 3 | 0 | 3 | 1 |
| Case 75 | 21 | 44,392,270 | 44,437,142 | 2 | 0 | 2 | 1 |
| Case 75 | 21 | 44,438,248 | 44,897,977 | 3 | 0 | 3 | 1 |
| Case 75 | 21 | 44,903,553 | 45,110,316 | 2 | 0 | 2 | 1 |
| Case 75 | 21 | 45,110,784 | 45,679,565 | 3 | 0 | 3 | 1 |
| Case 75 | 21 | 45,681,109 | 45,709,153 | 2 | 0 | 2 | 1 |
| Case 75 | 21 | 45,709,568 | 45,840,605 | 3 | 0 | 3 | 1 |
| Case 75 | 21 | 45,844,751 | 45,877,121 | 2 | 0 | 2 | 1 |
| Case 75 | 21 | 45,877,228 | 46,927,500 | 3 | 0 | 3 | 1 |
| Case 75 | 21 | 46,930,092 | 46,953,292 | 2 | 0 | 2 | 1 |
| Case 75 | 21 | 46,956,571 | 47,373,412 | 3 | 0 | 3 | 1 |
| Case 75 | 21 | 47,376,659 | 47,445,791 | 2 | 0 | 2 | 1 |
| Case 75 | 21 | 47,453,954 | 47,582,102 | 3 | 0 | 3 | 1 |
| Case 75 | 21 | 47,588,233 | 47,671,444 | 2 | 0 | 2 | 1 |
| Case 75 | 21 | 47,674,275 | 47,704,399 | 3 | 0 | 3 | 1 |
| Case 75 | 21 | 47,704,461 | 47,766,840 | 2 | 0 | 2 | 1 |

|         |    |             |             |   |   |   |   |
|---------|----|-------------|-------------|---|---|---|---|
| Case 75 | 21 | 47,766,883  | 47,810,597  | 3 | 0 | 3 | 1 |
| Case 75 | 21 | 47,811,153  | 47,864,633  | 2 | 0 | 2 | 1 |
| Case 75 | 21 | 47,867,318  | 48,027,084  | 3 | 0 | 3 | 1 |
| Case 75 | 21 | 48,027,880  | 48,063,476  | 2 | 0 | 2 | 1 |
| Case 75 | 21 | 48,064,382  | 48,100,155  | 3 | 0 | 3 | 1 |
| Case 75 | 22 | 16,114,244  | 19,504,398  | 4 | 0 | 4 | 1 |
| Case 75 | 22 | 19,506,456  | 19,743,640  | 5 | 0 | 5 | 1 |
| Case 75 | 22 | 19,747,082  | 20,139,204  | 4 | 0 | 4 | 1 |
| Case 75 | 22 | 20,144,663  | 21,005,697  | 5 | 0 | 5 | 1 |
| Case 75 | 22 | 21,007,726  | 22,266,577  | 4 | 0 | 4 | 1 |
| Case 75 | 22 | 22,266,808  | 23,262,360  | 5 | 0 | 5 | 1 |
| Case 75 | 22 | 23,263,708  | 24,222,710  | 4 | 0 | 4 | 1 |
| Case 75 | 22 | 24,224,655  | 25,115,459  | 5 | 0 | 5 | 1 |
| Case 75 | 22 | 25,115,524  | 25,187,544  | 4 | 0 | 4 | 1 |
| Case 75 | 22 | 25,189,055  | 25,241,381  | 5 | 0 | 5 | 1 |
| Case 75 | 22 | 25,242,592  | 25,466,553  | 4 | 0 | 4 | 1 |
| Case 75 | 22 | 25,473,134  | 26,543,287  | 5 | 0 | 5 | 1 |
| Case 75 | 22 | 26,550,841  | 27,405,385  | 4 | 0 | 4 | 1 |
| Case 75 | 22 | 27,405,625  | 30,326,102  | 5 | 0 | 5 | 1 |
| Case 75 | 22 | 30,328,070  | 32,946,113  | 4 | 0 | 4 | 1 |
| Case 75 | 22 | 32,950,104  | 36,891,858  | 5 | 0 | 5 | 1 |
| Case 75 | 22 | 36,892,240  | 38,623,714  | 4 | 0 | 4 | 1 |
| Case 75 | 22 | 38,627,339  | 38,864,460  | 5 | 0 | 5 | 1 |
| Case 75 | 22 | 38,875,632  | 45,596,249  | 4 | 0 | 4 | 1 |
| Case 75 | 22 | 45,597,631  | 45,736,153  | 5 | 0 | 5 | 1 |
| Case 75 | 22 | 45,736,485  | 51,195,728  | 4 | 0 | 4 | 1 |
| Case 76 | 1  | 82,154      | 846,808     | 3 | 2 | 5 | 0 |
| Case 76 | 1  | 854,250     | 14,422,886  | 3 | 0 | 3 | 1 |
| Case 76 | 1  | 14,425,555  | 14,577,474  | 2 | 0 | 2 | 1 |
| Case 76 | 1  | 14,579,733  | 49,664,304  | 3 | 0 | 3 | 1 |
| Case 76 | 1  | 49,695,123  | 71,953,123  | 2 | 0 | 2 | 1 |
| Case 76 | 1  | 71,954,701  | 72,533,927  | 1 | 0 | 1 | 0 |
| Case 76 | 1  | 72,535,536  | 72,615,118  | 2 | 0 | 2 | 1 |
| Case 76 | 1  | 72,628,347  | 72,826,172  | 1 | 0 | 1 | 0 |
| Case 76 | 1  | 72,828,221  | 73,111,887  | 2 | 0 | 2 | 1 |
| Case 76 | 1  | 73,116,491  | 74,507,423  | 4 | 0 | 4 | 1 |
| Case 76 | 1  | 74,507,450  | 75,087,549  | 3 | 0 | 3 | 1 |
| Case 76 | 1  | 75,089,136  | 76,586,272  | 4 | 0 | 4 | 1 |
| Case 76 | 1  | 76,586,876  | 76,766,754  | 3 | 0 | 3 | 1 |
| Case 76 | 1  | 76,768,447  | 78,410,240  | 4 | 0 | 4 | 1 |
| Case 76 | 1  | 78,412,779  | 78,762,998  | 3 | 0 | 3 | 1 |
| Case 76 | 1  | 78,766,380  | 79,093,818  | 4 | 0 | 4 | 1 |
| Case 76 | 1  | 79,093,821  | 79,166,285  | 3 | 0 | 3 | 1 |
| Case 76 | 1  | 79,167,440  | 79,580,392  | 4 | 0 | 4 | 1 |
| Case 76 | 1  | 79,581,567  | 82,848,779  | 3 | 0 | 3 | 1 |
| Case 76 | 1  | 82,850,151  | 83,253,132  | 4 | 0 | 4 | 1 |
| Case 76 | 1  | 83,257,232  | 106,540,583 | 3 | 0 | 3 | 1 |
| Case 76 | 1  | 106,568,613 | 107,444,101 | 2 | 0 | 2 | 1 |
| Case 76 | 1  | 107,448,618 | 121,164,607 | 3 | 0 | 3 | 1 |
| Case 76 | 1  | 121,171,208 | 121,346,616 | 4 | 0 | 4 | 1 |
| Case 76 | 1  | 142,649,718 | 146,643,555 | 3 | 0 | 3 | 1 |
| Case 76 | 1  | 146,648,224 | 147,373,447 | 4 | 0 | 4 | 1 |
| Case 76 | 1  | 147,374,326 | 151,792,814 | 3 | 0 | 3 | 1 |
| Case 76 | 1  | 151,792,842 | 152,004,435 | 4 | 0 | 4 | 1 |
| Case 76 | 1  | 152,004,804 | 157,772,422 | 3 | 0 | 3 | 1 |
| Case 76 | 1  | 157,772,443 | 158,123,284 | 4 | 0 | 4 | 1 |
| Case 76 | 1  | 158,123,721 | 158,450,314 | 3 | 0 | 3 | 1 |
| Case 76 | 1  | 158,450,382 | 158,510,273 | 4 | 0 | 4 | 1 |
| Case 76 | 1  | 158,516,967 | 158,725,419 | 3 | 0 | 3 | 1 |
| Case 76 | 1  | 158,725,504 | 159,161,279 | 4 | 0 | 4 | 1 |
| Case 76 | 1  | 159,163,314 | 159,533,068 | 3 | 0 | 3 | 1 |

|         |   |             |             |   |   |   |   |
|---------|---|-------------|-------------|---|---|---|---|
| Case 76 | 1 | 159,535,626 | 159,723,521 | 4 | 0 | 4 | 1 |
| Case 76 | 1 | 159,723,619 | 162,455,562 | 3 | 0 | 3 | 1 |
| Case 76 | 1 | 162,455,569 | 164,928,753 | 4 | 0 | 4 | 1 |
| Case 76 | 1 | 164,932,033 | 165,182,355 | 3 | 0 | 3 | 1 |
| Case 76 | 1 | 165,182,976 | 165,470,814 | 4 | 0 | 4 | 1 |
| Case 76 | 1 | 165,471,314 | 165,685,082 | 3 | 0 | 3 | 1 |
| Case 76 | 1 | 165,687,205 | 171,103,241 | 4 | 0 | 4 | 1 |
| Case 76 | 1 | 171,103,607 | 171,300,908 | 3 | 0 | 3 | 1 |
| Case 76 | 1 | 171,301,303 | 171,500,154 | 4 | 0 | 4 | 1 |
| Case 76 | 1 | 171,501,752 | 171,839,720 | 3 | 0 | 3 | 1 |
| Case 76 | 1 | 171,842,607 | 172,307,593 | 4 | 0 | 4 | 1 |
| Case 76 | 1 | 172,312,769 | 172,435,851 | 3 | 0 | 3 | 1 |
| Case 76 | 1 | 172,437,592 | 173,302,306 | 4 | 0 | 4 | 1 |
| Case 76 | 1 | 173,302,838 | 173,886,216 | 3 | 0 | 3 | 1 |
| Case 76 | 1 | 173,892,101 | 174,343,705 | 4 | 0 | 4 | 1 |
| Case 76 | 1 | 174,363,257 | 174,363,257 | 1 | 1 | 2 | 0 |
| Case 76 | 1 | 174,369,767 | 174,418,312 | 1 | 0 | 1 | 0 |
| Case 76 | 1 | 174,419,672 | 174,668,661 | 0 | 0 | 0 | 0 |
| Case 76 | 1 | 174,681,384 | 174,681,384 | 1 | 0 | 1 | 0 |
| Case 76 | 1 | 174,709,679 | 174,709,679 | 2 | 0 | 2 | 1 |
| Case 76 | 1 | 174,715,051 | 177,433,277 | 3 | 0 | 3 | 1 |
| Case 76 | 1 | 177,434,054 | 177,841,895 | 4 | 0 | 4 | 1 |
| Case 76 | 1 | 177,842,162 | 178,504,880 | 3 | 0 | 3 | 1 |
| Case 76 | 1 | 178,506,594 | 180,885,290 | 4 | 0 | 4 | 1 |
| Case 76 | 1 | 180,885,334 | 181,325,627 | 3 | 0 | 3 | 1 |
| Case 76 | 1 | 181,329,186 | 181,753,030 | 4 | 0 | 4 | 1 |
| Case 76 | 1 | 181,754,803 | 182,027,144 | 3 | 0 | 3 | 1 |
| Case 76 | 1 | 182,039,442 | 182,301,508 | 4 | 0 | 4 | 1 |
| Case 76 | 1 | 182,305,147 | 182,640,864 | 3 | 0 | 3 | 1 |
| Case 76 | 1 | 182,642,857 | 183,079,691 | 4 | 0 | 4 | 1 |
| Case 76 | 1 | 183,079,729 | 183,559,704 | 3 | 0 | 3 | 1 |
| Case 76 | 1 | 183,561,560 | 184,067,280 | 4 | 0 | 4 | 1 |
| Case 76 | 1 | 184,068,508 | 184,576,095 | 3 | 0 | 3 | 1 |
| Case 76 | 1 | 184,577,317 | 185,959,552 | 4 | 0 | 4 | 1 |
| Case 76 | 1 | 185,962,370 | 186,415,571 | 3 | 0 | 3 | 1 |
| Case 76 | 1 | 186,418,600 | 190,624,011 | 4 | 0 | 4 | 1 |
| Case 76 | 1 | 190,632,794 | 193,450,009 | 3 | 0 | 3 | 1 |
| Case 76 | 1 | 193,451,373 | 197,071,654 | 4 | 0 | 4 | 1 |
| Case 76 | 1 | 197,071,813 | 197,122,303 | 3 | 0 | 3 | 1 |
| Case 76 | 1 | 197,123,043 | 200,545,187 | 4 | 0 | 4 | 1 |
| Case 76 | 1 | 200,550,369 | 200,586,911 | 3 | 0 | 3 | 1 |
| Case 76 | 1 | 200,587,506 | 200,869,239 | 4 | 0 | 4 | 1 |
| Case 76 | 1 | 200,874,375 | 202,023,106 | 3 | 0 | 3 | 1 |
| Case 76 | 1 | 202,027,170 | 202,273,729 | 4 | 0 | 4 | 1 |
| Case 76 | 1 | 202,276,012 | 203,194,899 | 3 | 0 | 3 | 1 |
| Case 76 | 1 | 203,194,935 | 203,314,594 | 4 | 0 | 4 | 1 |
| Case 76 | 1 | 203,315,893 | 213,058,700 | 3 | 0 | 3 | 1 |
| Case 76 | 1 | 213,064,209 | 222,897,664 | 2 | 0 | 2 | 1 |
| Case 76 | 1 | 222,898,838 | 222,904,298 | 1 | 0 | 1 | 0 |
| Case 76 | 1 | 222,908,446 | 223,003,498 | 0 | 0 | 0 | 0 |
| Case 76 | 1 | 223,004,049 | 223,004,049 | 1 | 0 | 1 | 0 |
| Case 76 | 1 | 223,022,931 | 233,520,775 | 2 | 0 | 2 | 1 |
| Case 76 | 1 | 233,524,111 | 236,413,230 | 3 | 0 | 3 | 1 |
| Case 76 | 1 | 236,416,732 | 238,979,813 | 2 | 2 | 4 | 0 |
| Case 76 | 1 | 238,982,199 | 243,028,780 | 3 | 2 | 5 | 0 |
| Case 76 | 1 | 243,032,812 | 243,538,108 | 3 | 1 | 4 | 0 |
| Case 76 | 1 | 243,542,050 | 243,639,218 | 2 | 2 | 4 | 0 |
| Case 76 | 1 | 243,641,420 | 245,250,548 | 3 | 2 | 5 | 0 |
| Case 76 | 1 | 245,255,662 | 245,390,247 | 2 | 2 | 4 | 0 |
| Case 76 | 1 | 245,400,227 | 245,572,552 | 3 | 2 | 5 | 0 |
| Case 76 | 1 | 245,574,714 | 246,178,188 | 2 | 2 | 4 | 0 |

|         |   |             |             |   |   |   |   |
|---------|---|-------------|-------------|---|---|---|---|
| Case 76 | 1 | 246,181,070 | 247,586,336 | 3 | 2 | 5 | 0 |
| Case 76 | 1 | 247,587,155 | 247,769,752 | 2 | 2 | 4 | 0 |
| Case 76 | 1 | 247,769,768 | 247,910,283 | 3 | 2 | 5 | 0 |
| Case 76 | 1 | 247,910,460 | 249,218,992 | 3 | 1 | 4 | 0 |
| Case 76 | 2 | 18,674      | 38,227,561  | 2 | 1 | 3 | 0 |
| Case 76 | 2 | 38,229,826  | 38,274,908  | 2 | 0 | 2 | 1 |
| Case 76 | 2 | 38,277,832  | 48,809,498  | 2 | 1 | 3 | 0 |
| Case 76 | 2 | 48,809,593  | 48,824,698  | 3 | 1 | 4 | 0 |
| Case 76 | 2 | 48,827,497  | 49,381,533  | 2 | 1 | 3 | 0 |
| Case 76 | 2 | 49,381,585  | 49,519,654  | 2 | 2 | 4 | 0 |
| Case 76 | 2 | 49,522,163  | 75,072,923  | 2 | 1 | 3 | 0 |
| Case 76 | 2 | 75,074,055  | 75,168,664  | 2 | 0 | 2 | 1 |
| Case 76 | 2 | 75,170,336  | 76,281,624  | 2 | 1 | 3 | 0 |
| Case 76 | 2 | 76,287,089  | 76,486,806  | 2 | 2 | 4 | 0 |
| Case 76 | 2 | 76,488,564  | 79,508,503  | 2 | 1 | 3 | 0 |
| Case 76 | 2 | 79,508,931  | 79,968,075  | 2 | 2 | 4 | 0 |
| Case 76 | 2 | 79,968,873  | 81,614,001  | 2 | 1 | 3 | 0 |
| Case 76 | 2 | 81,623,974  | 82,390,641  | 2 | 2 | 4 | 0 |
| Case 76 | 2 | 82,396,211  | 92,081,640  | 2 | 1 | 3 | 0 |
| Case 76 | 2 | 95,429,424  | 98,408,924  | 2 | 1 | 3 | 0 |
| Case 76 | 2 | 98,409,398  | 98,461,802  | 2 | 0 | 2 | 1 |
| Case 76 | 2 | 98,462,658  | 140,962,137 | 2 | 1 | 3 | 0 |
| Case 76 | 2 | 140,966,549 | 141,348,712 | 1 | 1 | 2 | 0 |
| Case 76 | 2 | 141,349,306 | 141,771,962 | 1 | 0 | 1 | 0 |
| Case 76 | 2 | 141,777,554 | 141,810,244 | 2 | 1 | 3 | 0 |
| Case 76 | 2 | 141,813,216 | 141,882,963 | 1 | 1 | 2 | 0 |
| Case 76 | 2 | 141,888,035 | 141,897,042 | 2 | 0 | 2 | 1 |
| Case 76 | 2 | 141,916,520 | 141,929,225 | 2 | 1 | 3 | 0 |
| Case 76 | 2 | 141,932,472 | 142,032,671 | 1 | 0 | 1 | 0 |
| Case 76 | 2 | 142,035,286 | 142,143,385 | 1 | 1 | 2 | 0 |
| Case 76 | 2 | 142,148,511 | 153,193,698 | 2 | 1 | 3 | 0 |
| Case 76 | 2 | 153,197,805 | 153,299,943 | 2 | 0 | 2 | 1 |
| Case 76 | 2 | 153,315,366 | 196,374,552 | 2 | 1 | 3 | 0 |
| Case 76 | 2 | 196,375,520 | 197,511,105 | 3 | 1 | 4 | 0 |
| Case 76 | 2 | 197,521,487 | 198,097,758 | 2 | 1 | 3 | 0 |
| Case 76 | 2 | 198,108,977 | 198,495,767 | 3 | 1 | 4 | 0 |
| Case 76 | 2 | 198,497,512 | 199,139,675 | 2 | 1 | 3 | 0 |
| Case 76 | 2 | 199,144,261 | 201,692,776 | 3 | 1 | 4 | 0 |
| Case 76 | 2 | 201,718,139 | 202,025,621 | 2 | 1 | 3 | 0 |
| Case 76 | 2 | 202,036,478 | 202,102,685 | 3 | 1 | 4 | 0 |
| Case 76 | 2 | 202,111,380 | 212,281,381 | 3 | 0 | 3 | 1 |
| Case 76 | 2 | 212,283,146 | 212,325,378 | 2 | 0 | 2 | 1 |
| Case 76 | 2 | 212,327,353 | 213,233,739 | 3 | 0 | 3 | 1 |
| Case 76 | 2 | 213,236,480 | 213,386,267 | 2 | 0 | 2 | 1 |
| Case 76 | 2 | 213,387,389 | 215,513,430 | 3 | 0 | 3 | 1 |
| Case 76 | 2 | 215,514,980 | 215,673,664 | 2 | 0 | 2 | 1 |
| Case 76 | 2 | 215,677,308 | 243,048,760 | 3 | 0 | 3 | 1 |
| Case 76 | 3 | 61,495      | 1,503,156   | 1 | 1 | 2 | 0 |
| Case 76 | 3 | 1,503,929   | 1,722,181   | 1 | 0 | 1 | 0 |
| Case 76 | 3 | 1,722,281   | 3,629,346   | 1 | 1 | 2 | 0 |
| Case 76 | 3 | 3,632,942   | 3,689,371   | 1 | 0 | 1 | 0 |
| Case 76 | 3 | 3,690,193   | 4,735,407   | 1 | 1 | 2 | 0 |
| Case 76 | 3 | 4,738,774   | 4,742,030   | 1 | 0 | 1 | 0 |
| Case 76 | 3 | 4,742,779   | 4,809,647   | 2 | 0 | 2 | 1 |
| Case 76 | 3 | 4,809,969   | 21,008,710  | 1 | 1 | 2 | 0 |
| Case 76 | 3 | 21,020,875  | 21,270,162  | 1 | 0 | 1 | 0 |
| Case 76 | 3 | 21,270,688  | 41,266,655  | 1 | 1 | 2 | 0 |
| Case 76 | 3 | 41,267,276  | 59,741,758  | 2 | 1 | 3 | 0 |
| Case 76 | 3 | 59,749,703  | 59,990,805  | 2 | 0 | 2 | 1 |
| Case 76 | 3 | 59,991,608  | 66,914,581  | 2 | 1 | 3 | 0 |
| Case 76 | 3 | 66,914,689  | 67,061,960  | 1 | 1 | 2 | 0 |



|         |   |             |             |   |   |   |   |
|---------|---|-------------|-------------|---|---|---|---|
| Case 76 | 3 | 67,067,260  | 67,411,103  | 2 | 1 | 3 | 0 |
| Case 76 | 3 | 67,411,166  | 67,476,165  | 2 | 0 | 2 | 1 |
| Case 76 | 3 | 67,506,870  | 71,035,887  | 2 | 1 | 3 | 0 |
| Case 76 | 3 | 71,036,994  | 71,298,422  | 2 | 0 | 2 | 1 |
| Case 76 | 3 | 71,302,616  | 73,004,360  | 2 | 1 | 3 | 0 |
| Case 76 | 3 | 73,006,396  | 73,052,765  | 1 | 0 | 1 | 0 |
| Case 76 | 3 | 73,074,763  | 73,102,013  | 1 | 1 | 2 | 0 |
| Case 76 | 3 | 73,102,725  | 77,026,968  | 2 | 1 | 3 | 0 |
| Case 76 | 3 | 77,037,626  | 78,717,508  | 2 | 2 | 4 | 0 |
| Case 76 | 3 | 78,717,699  | 79,405,038  | 2 | 1 | 3 | 0 |
| Case 76 | 3 | 79,406,519  | 82,563,862  | 2 | 2 | 4 | 0 |
| Case 76 | 3 | 82,564,293  | 84,377,718  | 2 | 1 | 3 | 0 |
| Case 76 | 3 | 84,385,686  | 85,719,890  | 2 | 2 | 4 | 0 |
| Case 76 | 3 | 85,720,888  | 85,884,150  | 2 | 1 | 3 | 0 |
| Case 76 | 3 | 85,887,004  | 87,717,074  | 2 | 2 | 4 | 0 |
| Case 76 | 3 | 87,717,989  | 88,354,232  | 2 | 1 | 3 | 0 |
| Case 76 | 3 | 88,374,655  | 89,530,358  | 2 | 2 | 4 | 0 |
| Case 76 | 3 | 89,530,956  | 89,686,064  | 2 | 1 | 3 | 0 |
| Case 76 | 3 | 89,697,760  | 90,442,925  | 2 | 0 | 2 | 1 |
| Case 76 | 3 | 93,537,290  | 116,017,931 | 2 | 0 | 2 | 1 |
| Case 76 | 3 | 116,021,453 | 116,311,374 | 1 | 0 | 1 | 0 |
| Case 76 | 3 | 116,311,891 | 116,337,995 | 0 | 0 | 0 | 0 |
| Case 76 | 3 | 116,342,669 | 116,637,776 | 1 | 0 | 1 | 0 |
| Case 76 | 3 | 116,647,795 | 135,926,622 | 2 | 0 | 2 | 1 |
| Case 76 | 3 | 135,930,406 | 136,513,282 | 1 | 0 | 1 | 0 |
| Case 76 | 3 | 136,525,518 | 141,979,191 | 2 | 0 | 2 | 1 |
| Case 76 | 3 | 141,989,460 | 151,154,923 | 2 | 2 | 4 | 0 |
| Case 76 | 3 | 151,155,090 | 151,283,646 | 2 | 1 | 3 | 0 |
| Case 76 | 3 | 151,283,691 | 155,548,882 | 2 | 2 | 4 | 0 |
| Case 76 | 3 | 155,551,990 | 156,700,416 | 2 | 1 | 3 | 0 |
| Case 76 | 3 | 156,700,986 | 161,822,400 | 2 | 2 | 4 | 0 |
| Case 76 | 3 | 161,823,150 | 163,241,032 | 2 | 1 | 3 | 0 |
| Case 76 | 3 | 163,242,030 | 164,384,338 | 2 | 2 | 4 | 0 |
| Case 76 | 3 | 164,391,365 | 164,919,377 | 2 | 1 | 3 | 0 |
| Case 76 | 3 | 164,926,605 | 169,477,506 | 2 | 2 | 4 | 0 |
| Case 76 | 3 | 169,480,204 | 169,713,483 | 2 | 1 | 3 | 0 |
| Case 76 | 3 | 169,713,732 | 170,178,057 | 2 | 2 | 4 | 0 |
| Case 76 | 3 | 170,179,335 | 170,201,230 | 2 | 1 | 3 | 0 |
| Case 76 | 3 | 170,201,265 | 173,171,411 | 2 | 2 | 4 | 0 |
| Case 76 | 3 | 173,172,596 | 173,460,541 | 2 | 1 | 3 | 0 |
| Case 76 | 3 | 173,462,988 | 176,644,781 | 2 | 2 | 4 | 0 |
| Case 76 | 3 | 176,647,139 | 176,908,832 | 2 | 1 | 3 | 0 |
| Case 76 | 3 | 176,910,577 | 183,853,307 | 2 | 2 | 4 | 0 |
| Case 76 | 3 | 183,854,503 | 184,086,969 | 2 | 1 | 3 | 0 |
| Case 76 | 3 | 184,087,736 | 189,321,613 | 2 | 2 | 4 | 0 |
| Case 76 | 3 | 189,323,685 | 189,366,763 | 2 | 1 | 3 | 0 |
| Case 76 | 3 | 189,375,694 | 189,987,041 | 3 | 1 | 4 | 0 |
| Case 76 | 3 | 189,994,349 | 190,079,780 | 2 | 1 | 3 | 0 |
| Case 76 | 3 | 190,084,208 | 195,481,086 | 2 | 2 | 4 | 0 |
| Case 76 | 3 | 195,481,111 | 195,516,730 | 2 | 1 | 3 | 0 |
| Case 76 | 3 | 195,516,731 | 197,838,262 | 2 | 2 | 4 | 0 |
| Case 76 | 4 | 71,566      | 292,369     | 1 | 0 | 1 | 0 |
| Case 76 | 4 | 297,932     | 956,368     | 2 | 1 | 3 | 0 |
| Case 76 | 4 | 956,707     | 985,092     | 2 | 0 | 2 | 1 |
| Case 76 | 4 | 985,275     | 49,620,898  | 2 | 1 | 3 | 0 |
| Case 76 | 4 | 52,697,856  | 53,871,388  | 2 | 1 | 3 | 0 |
| Case 76 | 4 | 53,872,674  | 54,380,052  | 1 | 1 | 2 | 0 |
| Case 76 | 4 | 54,381,345  | 60,627,772  | 2 | 1 | 3 | 0 |
| Case 76 | 4 | 60,639,488  | 61,163,718  | 1 | 1 | 2 | 0 |
| Case 76 | 4 | 61,170,648  | 63,887,305  | 2 | 1 | 3 | 0 |
| Case 76 | 4 | 63,895,857  | 64,468,573  | 3 | 1 | 4 | 0 |

|         |   |             |             |   |   |   |   |
|---------|---|-------------|-------------|---|---|---|---|
| Case 76 | 4 | 64,474,350  | 65,305,086  | 2 | 1 | 3 | 0 |
| Case 76 | 4 | 65,309,678  | 66,306,421  | 3 | 1 | 4 | 0 |
| Case 76 | 4 | 66,308,481  | 66,322,437  | 2 | 1 | 3 | 0 |
| Case 76 | 4 | 66,327,854  | 66,917,610  | 1 | 1 | 2 | 0 |
| Case 76 | 4 | 66,923,059  | 68,499,985  | 2 | 1 | 3 | 0 |
| Case 76 | 4 | 68,504,780  | 68,566,823  | 1 | 1 | 2 | 0 |
| Case 76 | 4 | 68,591,252  | 81,967,779  | 2 | 1 | 3 | 0 |
| Case 76 | 4 | 81,968,362  | 83,381,564  | 1 | 1 | 2 | 0 |
| Case 76 | 4 | 83,403,563  | 86,222,977  | 2 | 1 | 3 | 0 |
| Case 76 | 4 | 86,251,698  | 91,000,334  | 1 | 1 | 2 | 0 |
| Case 76 | 4 | 91,025,850  | 91,069,888  | 1 | 0 | 1 | 0 |
| Case 76 | 4 | 91,123,665  | 91,183,746  | 0 | 0 | 0 | 0 |
| Case 76 | 4 | 91,185,206  | 91,203,145  | 1 | 0 | 1 | 0 |
| Case 76 | 4 | 91,210,048  | 92,201,568  | 1 | 1 | 2 | 0 |
| Case 76 | 4 | 92,207,543  | 92,405,232  | 1 | 0 | 1 | 0 |
| Case 76 | 4 | 92,420,171  | 103,542,005 | 1 | 1 | 2 | 0 |
| Case 76 | 4 | 103,542,201 | 103,730,849 | 1 | 0 | 1 | 0 |
| Case 76 | 4 | 103,733,600 | 130,908,815 | 1 | 1 | 2 | 0 |
| Case 76 | 4 | 130,912,560 | 131,003,046 | 2 | 1 | 3 | 0 |
| Case 76 | 4 | 131,003,605 | 156,698,677 | 1 | 1 | 2 | 0 |
| Case 76 | 4 | 156,699,636 | 156,825,203 | 2 | 1 | 3 | 0 |
| Case 76 | 4 | 156,828,921 | 156,839,352 | 2 | 0 | 2 | 1 |
| Case 76 | 4 | 156,839,953 | 182,048,692 | 2 | 1 | 3 | 0 |
| Case 76 | 4 | 182,053,380 | 182,405,735 | 1 | 0 | 1 | 0 |
| Case 76 | 4 | 182,407,529 | 182,438,604 | 1 | 1 | 2 | 0 |
| Case 76 | 4 | 182,444,131 | 190,481,771 | 2 | 1 | 3 | 0 |
| Case 76 | 4 | 190,522,201 | 190,963,766 | 1 | 1 | 2 | 0 |
| Case 76 | 5 | 38,139      | 404,804     | 3 | 0 | 3 | 1 |
| Case 76 | 5 | 407,230     | 1,120,954   | 2 | 1 | 3 | 0 |
| Case 76 | 5 | 1,121,954   | 1,190,088   | 3 | 1 | 4 | 0 |
| Case 76 | 5 | 1,190,440   | 2,229,014   | 2 | 1 | 3 | 0 |
| Case 76 | 5 | 2,247,093   | 2,279,813   | 3 | 1 | 4 | 0 |
| Case 76 | 5 | 2,279,866   | 2,420,992   | 2 | 1 | 3 | 0 |
| Case 76 | 5 | 2,424,387   | 2,493,280   | 3 | 1 | 4 | 0 |
| Case 76 | 5 | 2,494,273   | 2,755,932   | 2 | 1 | 3 | 0 |
| Case 76 | 5 | 2,757,920   | 3,018,524   | 3 | 1 | 4 | 0 |
| Case 76 | 5 | 3,019,005   | 3,770,600   | 2 | 1 | 3 | 0 |
| Case 76 | 5 | 3,771,121   | 4,138,095   | 3 | 1 | 4 | 0 |
| Case 76 | 5 | 4,140,796   | 5,074,825   | 2 | 1 | 3 | 0 |
| Case 76 | 5 | 5,078,313   | 5,317,110   | 3 | 1 | 4 | 0 |
| Case 76 | 5 | 5,317,882   | 5,602,673   | 2 | 1 | 3 | 0 |
| Case 76 | 5 | 5,605,051   | 6,316,676   | 3 | 1 | 4 | 0 |
| Case 76 | 5 | 6,317,260   | 6,820,833   | 2 | 1 | 3 | 0 |
| Case 76 | 5 | 6,821,914   | 7,831,013   | 3 | 1 | 4 | 0 |
| Case 76 | 5 | 7,831,806   | 7,930,866   | 2 | 1 | 3 | 0 |
| Case 76 | 5 | 7,933,629   | 9,192,881   | 3 | 1 | 4 | 0 |
| Case 76 | 5 | 9,193,406   | 9,536,983   | 2 | 1 | 3 | 0 |
| Case 76 | 5 | 9,539,540   | 10,235,490  | 3 | 1 | 4 | 0 |
| Case 76 | 5 | 10,236,641  | 10,771,228  | 2 | 1 | 3 | 0 |
| Case 76 | 5 | 10,777,617  | 11,186,652  | 3 | 1 | 4 | 0 |
| Case 76 | 5 | 11,190,998  | 11,349,674  | 2 | 1 | 3 | 0 |
| Case 76 | 5 | 11,361,864  | 11,910,541  | 3 | 1 | 4 | 0 |
| Case 76 | 5 | 11,913,471  | 12,675,698  | 2 | 1 | 3 | 0 |
| Case 76 | 5 | 12,682,143  | 13,729,628  | 3 | 1 | 4 | 0 |
| Case 76 | 5 | 13,735,892  | 14,010,420  | 2 | 1 | 3 | 0 |
| Case 76 | 5 | 14,013,407  | 14,400,274  | 3 | 1 | 4 | 0 |
| Case 76 | 5 | 14,402,871  | 14,508,484  | 2 | 1 | 3 | 0 |
| Case 76 | 5 | 14,509,966  | 16,670,618  | 3 | 1 | 4 | 0 |
| Case 76 | 5 | 16,670,954  | 16,701,800  | 2 | 1 | 3 | 0 |
| Case 76 | 5 | 16,701,875  | 21,800,192  | 3 | 1 | 4 | 0 |
| Case 76 | 5 | 21,802,280  | 22,219,836  | 2 | 1 | 3 | 0 |

|         |   |             |             |   |   |   |   |
|---------|---|-------------|-------------|---|---|---|---|
| Case 76 | 5 | 22,222,461  | 22,923,887  | 3 | 1 | 4 | 0 |
| Case 76 | 5 | 22,941,669  | 24,261,955  | 2 | 1 | 3 | 0 |
| Case 76 | 5 | 24,264,090  | 26,865,301  | 3 | 1 | 4 | 0 |
| Case 76 | 5 | 26,865,656  | 27,058,850  | 2 | 1 | 3 | 0 |
| Case 76 | 5 | 27,059,425  | 30,108,604  | 3 | 1 | 4 | 0 |
| Case 76 | 5 | 30,113,024  | 46,399,093  | 2 | 1 | 3 | 0 |
| Case 76 | 5 | 49,457,282  | 55,028,160  | 2 | 1 | 3 | 0 |
| Case 76 | 5 | 55,029,596  | 58,902,233  | 1 | 1 | 2 | 0 |
| Case 76 | 5 | 58,905,769  | 58,988,846  | 1 | 0 | 1 | 0 |
| Case 76 | 5 | 59,001,077  | 133,997,171 | 1 | 1 | 2 | 0 |
| Case 76 | 5 | 134,002,606 | 134,063,041 | 1 | 0 | 1 | 0 |
| Case 76 | 5 | 134,074,481 | 138,652,744 | 1 | 1 | 2 | 0 |
| Case 76 | 5 | 138,659,158 | 138,701,567 | 1 | 0 | 1 | 0 |
| Case 76 | 5 | 138,707,916 | 139,931,613 | 1 | 1 | 2 | 0 |
| Case 76 | 5 | 139,931,617 | 139,931,644 | 1 | 0 | 1 | 0 |
| Case 76 | 5 | 139,931,646 | 170,818,427 | 1 | 1 | 2 | 0 |
| Case 76 | 5 | 170,823,601 | 170,898,298 | 2 | 1 | 3 | 0 |
| Case 76 | 5 | 170,899,404 | 180,511,976 | 1 | 1 | 2 | 0 |
| Case 76 | 5 | 180,512,315 | 180,693,127 | 2 | 0 | 2 | 1 |
| Case 76 | 6 | 108,666     | 1,997,212   | 2 | 1 | 3 | 0 |
| Case 76 | 6 | 2,012,739   | 2,039,027   | 2 | 0 | 2 | 1 |
| Case 76 | 6 | 2,048,584   | 2,059,110   | 1 | 0 | 1 | 0 |
| Case 76 | 6 | 2,062,447   | 2,248,825   | 0 | 0 | 0 | 0 |
| Case 76 | 6 | 2,276,503   | 2,293,020   | 1 | 0 | 1 | 0 |
| Case 76 | 6 | 2,329,168   | 2,472,613   | 2 | 0 | 2 | 1 |
| Case 76 | 6 | 2,474,874   | 5,737,122   | 2 | 1 | 3 | 0 |
| Case 76 | 6 | 5,741,436   | 6,040,482   | 1 | 1 | 2 | 0 |
| Case 76 | 6 | 6,047,249   | 31,218,327  | 2 | 1 | 3 | 0 |
| Case 76 | 6 | 31,218,889  | 31,221,914  | 1 | 0 | 1 | 0 |
| Case 76 | 6 | 31,230,701  | 37,879,556  | 2 | 1 | 3 | 0 |
| Case 76 | 6 | 37,881,445  | 38,073,822  | 1 | 1 | 2 | 0 |
| Case 76 | 6 | 38,084,405  | 58,752,089  | 2 | 1 | 3 | 0 |
| Case 76 | 6 | 61,891,118  | 78,965,525  | 2 | 1 | 3 | 0 |
| Case 76 | 6 | 78,972,930  | 79,029,367  | 1 | 0 | 1 | 0 |
| Case 76 | 6 | 79,039,234  | 101,688,127 | 2 | 1 | 3 | 0 |
| Case 76 | 6 | 101,710,737 | 102,058,891 | 1 | 0 | 1 | 0 |
| Case 76 | 6 | 102,065,160 | 108,889,822 | 2 | 1 | 3 | 0 |
| Case 76 | 6 | 108,902,649 | 109,069,491 | 2 | 0 | 2 | 1 |
| Case 76 | 6 | 109,073,035 | 125,528,577 | 2 | 1 | 3 | 0 |
| Case 76 | 6 | 125,528,974 | 125,585,976 | 3 | 1 | 4 | 0 |
| Case 76 | 6 | 125,587,961 | 136,622,032 | 2 | 1 | 3 | 0 |
| Case 76 | 6 | 136,645,817 | 136,709,598 | 1 | 1 | 2 | 0 |
| Case 76 | 6 | 136,710,478 | 146,145,678 | 2 | 1 | 3 | 0 |
| Case 76 | 6 | 146,204,066 | 146,406,294 | 2 | 0 | 2 | 1 |
| Case 76 | 6 | 146,413,758 | 149,948,689 | 2 | 1 | 3 | 0 |
| Case 76 | 6 | 149,953,931 | 150,132,092 | 2 | 0 | 2 | 1 |
| Case 76 | 6 | 150,138,699 | 157,183,559 | 2 | 1 | 3 | 0 |
| Case 76 | 6 | 157,188,134 | 157,444,914 | 2 | 0 | 2 | 1 |
| Case 76 | 6 | 157,445,999 | 162,594,941 | 2 | 1 | 3 | 0 |
| Case 76 | 6 | 162,597,463 | 162,850,909 | 2 | 0 | 2 | 1 |
| Case 76 | 6 | 162,851,519 | 170,980,171 | 2 | 1 | 3 | 0 |
| Case 76 | 7 | 44,935      | 1,153,502   | 2 | 1 | 3 | 0 |
| Case 76 | 7 | 1,161,646   | 1,480,247   | 2 | 2 | 4 | 0 |
| Case 76 | 7 | 1,480,252   | 2,111,580   | 2 | 1 | 3 | 0 |
| Case 76 | 7 | 2,111,636   | 2,578,947   | 2 | 2 | 4 | 0 |
| Case 76 | 7 | 2,579,181   | 2,652,630   | 2 | 1 | 3 | 0 |
| Case 76 | 7 | 2,653,792   | 3,991,479   | 2 | 2 | 4 | 0 |
| Case 76 | 7 | 3,991,493   | 4,277,374   | 2 | 1 | 3 | 0 |
| Case 76 | 7 | 4,279,500   | 11,306,897  | 2 | 2 | 4 | 0 |
| Case 76 | 7 | 11,313,841  | 11,349,438  | 2 | 0 | 2 | 1 |
| Case 76 | 7 | 11,351,104  | 30,406,767  | 2 | 2 | 4 | 0 |

|         |   |             |             |   |   |   |   |
|---------|---|-------------|-------------|---|---|---|---|
| Case 76 | 7 | 30,407,445  | 30,494,824  | 2 | 1 | 3 | 0 |
| Case 76 | 7 | 30,494,833  | 38,292,663  | 2 | 2 | 4 | 0 |
| Case 76 | 7 | 38,297,145  | 38,364,289  | 3 | 2 | 5 | 0 |
| Case 76 | 7 | 38,367,259  | 44,573,130  | 2 | 2 | 4 | 0 |
| Case 76 | 7 | 44,574,135  | 44,617,748  | 2 | 1 | 3 | 0 |
| Case 76 | 7 | 44,619,215  | 47,532,716  | 2 | 2 | 4 | 0 |
| Case 76 | 7 | 47,537,679  | 47,565,504  | 2 | 1 | 3 | 0 |
| Case 76 | 7 | 47,566,295  | 57,256,934  | 2 | 2 | 4 | 0 |
| Case 76 | 7 | 57,269,842  | 57,423,944  | 2 | 1 | 3 | 0 |
| Case 76 | 7 | 57,432,549  | 58,019,061  | 2 | 2 | 4 | 0 |
| Case 76 | 7 | 61,056,053  | 69,546,617  | 2 | 2 | 4 | 0 |
| Case 76 | 7 | 69,562,563  | 69,739,690  | 2 | 0 | 2 | 1 |
| Case 76 | 7 | 69,741,327  | 70,161,221  | 1 | 0 | 1 | 0 |
| Case 76 | 7 | 70,169,449  | 72,073,716  | 2 | 0 | 2 | 1 |
| Case 76 | 7 | 72,074,150  | 72,305,671  | 2 | 2 | 4 | 0 |
| Case 76 | 7 | 72,413,683  | 94,934,455  | 2 | 0 | 2 | 1 |
| Case 76 | 7 | 94,934,573  | 94,940,879  | 3 | 0 | 3 | 1 |
| Case 76 | 7 | 94,940,880  | 142,386,873 | 2 | 0 | 2 | 1 |
| Case 76 | 7 | 142,389,219 | 142,493,129 | 3 | 0 | 3 | 1 |
| Case 76 | 7 | 142,496,293 | 146,142,212 | 2 | 0 | 2 | 1 |
| Case 76 | 7 | 146,168,418 | 146,245,753 | 1 | 0 | 1 | 0 |
| Case 76 | 7 | 146,248,268 | 146,571,183 | 2 | 0 | 2 | 1 |
| Case 76 | 7 | 146,575,177 | 146,831,849 | 1 | 0 | 1 | 0 |
| Case 76 | 7 | 146,842,500 | 147,369,658 | 2 | 0 | 2 | 1 |
| Case 76 | 7 | 147,370,955 | 147,549,713 | 1 | 0 | 1 | 0 |
| Case 76 | 7 | 147,558,680 | 159,119,486 | 2 | 0 | 2 | 1 |
| Case 76 | 8 | 164,984     | 43,791,691  | 1 | 1 | 2 | 0 |
| Case 76 | 8 | 46,886,735  | 111,803,586 | 1 | 1 | 2 | 0 |
| Case 76 | 8 | 111,811,966 | 115,839,310 | 2 | 1 | 3 | 0 |
| Case 76 | 8 | 115,839,385 | 123,651,942 | 3 | 1 | 4 | 0 |
| Case 76 | 8 | 123,657,902 | 123,990,781 | 2 | 1 | 3 | 0 |
| Case 76 | 8 | 123,993,765 | 124,089,878 | 3 | 1 | 4 | 0 |
| Case 76 | 8 | 124,094,998 | 124,241,342 | 2 | 1 | 3 | 0 |
| Case 76 | 8 | 124,243,771 | 124,626,983 | 3 | 1 | 4 | 0 |
| Case 76 | 8 | 124,630,352 | 124,927,711 | 2 | 1 | 3 | 0 |
| Case 76 | 8 | 124,930,887 | 133,064,881 | 3 | 1 | 4 | 0 |
| Case 76 | 8 | 133,065,379 | 133,183,642 | 2 | 1 | 3 | 0 |
| Case 76 | 8 | 133,193,916 | 133,881,244 | 3 | 1 | 4 | 0 |
| Case 76 | 8 | 133,882,026 | 134,263,453 | 2 | 1 | 3 | 0 |
| Case 76 | 8 | 134,264,054 | 135,612,595 | 3 | 1 | 4 | 0 |
| Case 76 | 8 | 135,612,745 | 135,649,769 | 2 | 1 | 3 | 0 |
| Case 76 | 8 | 135,649,838 | 135,986,892 | 3 | 1 | 4 | 0 |
| Case 76 | 8 | 136,005,077 | 140,925,766 | 2 | 1 | 3 | 0 |
| Case 76 | 8 | 140,926,772 | 140,998,950 | 1 | 1 | 2 | 0 |
| Case 76 | 8 | 141,004,455 | 146,293,414 | 2 | 1 | 3 | 0 |
| Case 76 | 9 | 46,587      | 707,463     | 1 | 0 | 1 | 0 |
| Case 76 | 9 | 710,818     | 712,856     | 2 | 0 | 2 | 1 |
| Case 76 | 9 | 713,108     | 988,376     | 1 | 0 | 1 | 0 |
| Case 76 | 9 | 990,076     | 1,000,520   | 1 | 1 | 2 | 0 |
| Case 76 | 9 | 1,001,309   | 1,053,910   | 1 | 0 | 1 | 0 |
| Case 76 | 9 | 1,054,991   | 1,056,887   | 1 | 1 | 2 | 0 |
| Case 76 | 9 | 1,056,959   | 2,640,805   | 1 | 0 | 1 | 0 |
| Case 76 | 9 | 2,643,175   | 2,645,016   | 1 | 1 | 2 | 0 |
| Case 76 | 9 | 2,645,577   | 5,918,374   | 1 | 0 | 1 | 0 |
| Case 76 | 9 | 5,919,734   | 5,920,886   | 1 | 1 | 2 | 0 |
| Case 76 | 9 | 5,920,894   | 8,467,855   | 1 | 0 | 1 | 0 |
| Case 76 | 9 | 8,468,567   | 8,486,299   | 1 | 1 | 2 | 0 |
| Case 76 | 9 | 8,486,335   | 8,889,419   | 1 | 0 | 1 | 0 |
| Case 76 | 9 | 8,890,725   | 9,804,718   | 0 | 0 | 0 | 0 |
| Case 76 | 9 | 9,805,134   | 9,896,971   | 1 | 0 | 1 | 0 |
| Case 76 | 9 | 9,898,870   | 10,000,931  | 0 | 0 | 0 | 0 |

|         |    |             |             |   |   |   |   |
|---------|----|-------------|-------------|---|---|---|---|
| Case 76 | 9  | 10,004,946  | 16,430,599  | 1 | 0 | 1 | 0 |
| Case 76 | 9  | 16,432,118  | 16,480,296  | 2 | 0 | 2 | 1 |
| Case 76 | 9  | 16,482,083  | 18,928,508  | 1 | 0 | 1 | 0 |
| Case 76 | 9  | 18,928,525  | 18,930,880  | 1 | 1 | 2 | 0 |
| Case 76 | 9  | 18,932,805  | 19,057,965  | 1 | 0 | 1 | 0 |
| Case 76 | 9  | 19,058,204  | 19,063,081  | 1 | 1 | 2 | 0 |
| Case 76 | 9  | 19,065,295  | 19,465,900  | 1 | 0 | 1 | 0 |
| Case 76 | 9  | 19,468,530  | 19,516,335  | 2 | 0 | 2 | 1 |
| Case 76 | 9  | 19,517,795  | 19,746,160  | 1 | 0 | 1 | 0 |
| Case 76 | 9  | 19,751,159  | 19,801,918  | 2 | 0 | 2 | 1 |
| Case 76 | 9  | 19,803,724  | 23,064,815  | 1 | 0 | 1 | 0 |
| Case 76 | 9  | 23,073,339  | 23,074,432  | 0 | 0 | 0 | 0 |
| Case 76 | 9  | 23,078,402  | 27,401,297  | 1 | 0 | 1 | 0 |
| Case 76 | 9  | 27,402,961  | 27,473,099  | 1 | 1 | 2 | 0 |
| Case 76 | 9  | 27,474,214  | 28,677,376  | 1 | 0 | 1 | 0 |
| Case 76 | 9  | 28,680,131  | 28,759,983  | 0 | 0 | 0 | 0 |
| Case 76 | 9  | 28,771,619  | 29,374,906  | 1 | 0 | 1 | 0 |
| Case 76 | 9  | 29,393,359  | 29,536,618  | 0 | 0 | 0 | 0 |
| Case 76 | 9  | 29,539,147  | 31,872,624  | 1 | 0 | 1 | 0 |
| Case 76 | 9  | 31,873,011  | 31,873,011  | 2 | 0 | 2 | 1 |
| Case 76 | 9  | 31,879,919  | 31,879,919  | 4 | 1 | 5 | 0 |
| Case 76 | 9  | 31,892,857  | 32,255,125  | 7 | 0 | 7 | 1 |
| Case 76 | 9  | 32,257,426  | 32,381,785  | 6 | 0 | 6 | 1 |
| Case 76 | 9  | 32,381,910  | 32,381,910  | 2 | 1 | 3 | 0 |
| Case 76 | 9  | 32,382,071  | 32,559,114  | 5 | 0 | 5 | 1 |
| Case 76 | 9  | 32,569,145  | 33,204,104  | 6 | 0 | 6 | 1 |
| Case 76 | 9  | 33,205,183  | 33,205,408  | 2 | 1 | 3 | 0 |
| Case 76 | 9  | 33,206,375  | 33,761,112  | 5 | 0 | 5 | 1 |
| Case 76 | 9  | 33,771,241  | 35,271,817  | 4 | 0 | 4 | 1 |
| Case 76 | 9  | 35,289,544  | 46,944,322  | 1 | 1 | 2 | 0 |
| Case 76 | 9  | 65,629,772  | 125,880,828 | 1 | 1 | 2 | 0 |
| Case 76 | 9  | 125,880,929 | 125,932,187 | 1 | 0 | 1 | 0 |
| Case 76 | 9  | 125,963,450 | 141,066,491 | 1 | 1 | 2 | 0 |
| Case 76 | 10 | 98,087      | 5,043,846   | 2 | 0 | 2 | 1 |
| Case 76 | 10 | 5,051,532   | 5,136,651   | 1 | 0 | 1 | 0 |
| Case 76 | 10 | 5,136,654   | 39,097,912  | 2 | 0 | 2 | 1 |
| Case 76 | 10 | 42,436,301  | 52,479,421  | 2 | 0 | 2 | 1 |
| Case 76 | 10 | 52,484,993  | 52,751,151  | 3 | 0 | 3 | 1 |
| Case 76 | 10 | 52,751,177  | 92,862,763  | 2 | 0 | 2 | 1 |
| Case 76 | 10 | 92,867,818  | 92,934,593  | 3 | 0 | 3 | 1 |
| Case 76 | 10 | 92,937,921  | 126,796,382 | 2 | 0 | 2 | 1 |
| Case 76 | 10 | 126,798,920 | 129,899,578 | 2 | 2 | 4 | 0 |
| Case 76 | 10 | 129,899,778 | 129,910,064 | 2 | 1 | 3 | 0 |
| Case 76 | 10 | 129,910,252 | 134,021,870 | 2 | 2 | 4 | 0 |
| Case 76 | 10 | 134,026,212 | 135,012,672 | 2 | 1 | 3 | 0 |
| Case 76 | 10 | 135,013,923 | 135,083,881 | 2 | 2 | 4 | 0 |
| Case 76 | 10 | 135,083,913 | 135,195,332 | 2 | 1 | 3 | 0 |
| Case 76 | 10 | 135,197,419 | 135,340,548 | 2 | 2 | 4 | 0 |
| Case 76 | 10 | 135,340,567 | 135,477,883 | 2 | 1 | 3 | 0 |
| Case 76 | 11 | 193,146     | 16,615,280  | 2 | 0 | 2 | 1 |
| Case 76 | 11 | 16,634,707  | 16,853,714  | 2 | 1 | 3 | 0 |
| Case 76 | 11 | 16,858,229  | 48,058,313  | 2 | 0 | 2 | 1 |
| Case 76 | 11 | 48,066,048  | 49,257,082  | 2 | 1 | 3 | 0 |
| Case 76 | 11 | 49,280,857  | 51,591,253  | 2 | 0 | 2 | 1 |
| Case 76 | 11 | 54,794,237  | 99,032,846  | 2 | 0 | 2 | 1 |
| Case 76 | 11 | 99,033,861  | 99,418,620  | 1 | 0 | 1 | 0 |
| Case 76 | 11 | 99,419,294  | 134,934,063 | 2 | 0 | 2 | 1 |
| Case 76 | 12 | 191,619     | 25,314,094  | 2 | 0 | 2 | 1 |
| Case 76 | 12 | 25,339,843  | 25,733,769  | 3 | 2 | 5 | 0 |
| Case 76 | 12 | 25,734,249  | 25,736,929  | 2 | 2 | 4 | 0 |
| Case 76 | 12 | 25,736,990  | 26,205,379  | 4 | 1 | 5 | 0 |

|         |    |             |             |   |   |   |   |
|---------|----|-------------|-------------|---|---|---|---|
| Case 76 | 12 | 26,205,948  | 26,277,652  | 2 | 2 | 4 | 0 |
| Case 76 | 12 | 26,277,654  | 27,182,769  | 4 | 1 | 5 | 0 |
| Case 76 | 12 | 27,199,180  | 30,253,766  | 2 | 2 | 4 | 0 |
| Case 76 | 12 | 30,258,048  | 31,259,372  | 4 | 1 | 5 | 0 |
| Case 76 | 12 | 31,266,287  | 32,713,919  | 6 | 1 | 7 | 0 |
| Case 76 | 12 | 32,719,928  | 34,853,011  | 2 | 1 | 3 | 0 |
| Case 76 | 12 | 37,876,400  | 61,885,106  | 2 | 1 | 3 | 0 |
| Case 76 | 12 | 61,886,175  | 71,898,821  | 2 | 0 | 2 | 1 |
| Case 76 | 12 | 71,904,790  | 71,978,443  | 2 | 1 | 3 | 0 |
| Case 76 | 12 | 71,978,728  | 75,889,428  | 2 | 0 | 2 | 1 |
| Case 76 | 12 | 75,892,632  | 75,902,185  | 4 | 0 | 4 | 1 |
| Case 76 | 12 | 75,910,307  | 99,726,416  | 2 | 0 | 2 | 1 |
| Case 76 | 12 | 99,726,603  | 100,063,310 | 1 | 0 | 1 | 0 |
| Case 76 | 12 | 100,073,472 | 104,720,179 | 2 | 0 | 2 | 1 |
| Case 76 | 12 | 104,730,846 | 104,813,555 | 2 | 2 | 4 | 0 |
| Case 76 | 12 | 104,815,303 | 105,001,347 | 2 | 1 | 3 | 0 |
| Case 76 | 12 | 105,001,738 | 106,576,969 | 2 | 2 | 4 | 0 |
| Case 76 | 12 | 106,579,245 | 107,208,919 | 2 | 1 | 3 | 0 |
| Case 76 | 12 | 107,209,021 | 107,951,106 | 2 | 2 | 4 | 0 |
| Case 76 | 12 | 107,954,920 | 108,082,253 | 2 | 1 | 3 | 0 |
| Case 76 | 12 | 108,086,351 | 108,685,691 | 2 | 2 | 4 | 0 |
| Case 76 | 12 | 108,685,706 | 108,722,025 | 2 | 1 | 3 | 0 |
| Case 76 | 12 | 108,724,296 | 108,900,137 | 2 | 2 | 4 | 0 |
| Case 76 | 12 | 108,903,873 | 109,304,187 | 2 | 1 | 3 | 0 |
| Case 76 | 12 | 109,305,521 | 109,519,188 | 2 | 2 | 4 | 0 |
| Case 76 | 12 | 109,519,770 | 112,645,401 | 2 | 1 | 3 | 0 |
| Case 76 | 12 | 112,647,772 | 113,285,551 | 2 | 2 | 4 | 0 |
| Case 76 | 12 | 113,285,626 | 113,938,443 | 2 | 1 | 3 | 0 |
| Case 76 | 12 | 113,945,818 | 114,050,965 | 2 | 2 | 4 | 0 |
| Case 76 | 12 | 114,053,008 | 114,176,777 | 2 | 1 | 3 | 0 |
| Case 76 | 12 | 114,177,890 | 114,274,347 | 2 | 2 | 4 | 0 |
| Case 76 | 12 | 114,275,242 | 114,401,173 | 2 | 1 | 3 | 0 |
| Case 76 | 12 | 114,401,696 | 114,854,996 | 2 | 2 | 4 | 0 |
| Case 76 | 12 | 114,856,889 | 114,989,021 | 2 | 1 | 3 | 0 |
| Case 76 | 12 | 114,992,168 | 115,042,797 | 2 | 2 | 4 | 0 |
| Case 76 | 12 | 115,049,850 | 115,335,636 | 2 | 1 | 3 | 0 |
| Case 76 | 12 | 115,344,085 | 115,436,197 | 2 | 2 | 4 | 0 |
| Case 76 | 12 | 115,436,727 | 115,687,359 | 2 | 1 | 3 | 0 |
| Case 76 | 12 | 115,689,433 | 116,393,666 | 2 | 2 | 4 | 0 |
| Case 76 | 12 | 116,400,183 | 116,645,420 | 2 | 1 | 3 | 0 |
| Case 76 | 12 | 116,718,953 | 117,443,591 | 2 | 2 | 4 | 0 |
| Case 76 | 12 | 117,444,785 | 117,693,813 | 2 | 1 | 3 | 0 |
| Case 76 | 12 | 117,693,817 | 118,015,205 | 2 | 2 | 4 | 0 |
| Case 76 | 12 | 118,015,906 | 118,202,077 | 2 | 1 | 3 | 0 |
| Case 76 | 12 | 118,202,925 | 118,533,413 | 2 | 2 | 4 | 0 |
| Case 76 | 12 | 118,533,432 | 118,950,715 | 2 | 1 | 3 | 0 |
| Case 76 | 12 | 118,951,810 | 119,629,032 | 2 | 2 | 4 | 0 |
| Case 76 | 12 | 119,631,571 | 119,866,496 | 2 | 1 | 3 | 0 |
| Case 76 | 12 | 119,866,533 | 120,104,992 | 2 | 2 | 4 | 0 |
| Case 76 | 12 | 120,106,129 | 120,166,497 | 2 | 1 | 3 | 0 |
| Case 76 | 12 | 120,171,995 | 120,266,130 | 2 | 2 | 4 | 0 |
| Case 76 | 12 | 120,270,598 | 120,762,765 | 2 | 1 | 3 | 0 |
| Case 76 | 12 | 120,762,837 | 120,802,018 | 2 | 2 | 4 | 0 |
| Case 76 | 12 | 120,803,783 | 121,050,956 | 2 | 1 | 3 | 0 |
| Case 76 | 12 | 121,051,285 | 121,147,612 | 2 | 2 | 4 | 0 |
| Case 76 | 12 | 121,151,093 | 125,669,216 | 2 | 1 | 3 | 0 |
| Case 76 | 12 | 125,681,761 | 125,785,550 | 2 | 0 | 2 | 1 |
| Case 76 | 12 | 125,795,991 | 133,810,935 | 2 | 1 | 3 | 0 |
| Case 76 | 13 | 19,058,717  | 20,632,554  | 3 | 2 | 5 | 0 |
| Case 76 | 13 | 20,632,833  | 20,768,144  | 2 | 2 | 4 | 0 |
| Case 76 | 13 | 20,769,712  | 21,483,113  | 3 | 2 | 5 | 0 |

|         |    |            |            |   |   |   |   |
|---------|----|------------|------------|---|---|---|---|
| Case 76 | 13 | 21,483,892 | 21,916,905 | 2 | 2 | 4 | 0 |
| Case 76 | 13 | 21,917,902 | 22,385,730 | 3 | 2 | 5 | 0 |
| Case 76 | 13 | 22,387,359 | 22,710,015 | 2 | 2 | 4 | 0 |
| Case 76 | 13 | 22,712,282 | 24,831,455 | 3 | 2 | 5 | 0 |
| Case 76 | 13 | 24,834,836 | 25,033,109 | 2 | 2 | 4 | 0 |
| Case 76 | 13 | 25,033,198 | 25,240,623 | 3 | 2 | 5 | 0 |
| Case 76 | 13 | 25,241,241 | 25,285,914 | 2 | 2 | 4 | 0 |
| Case 76 | 13 | 25,287,214 | 25,724,658 | 3 | 2 | 5 | 0 |
| Case 76 | 13 | 25,725,069 | 26,291,452 | 2 | 2 | 4 | 0 |
| Case 76 | 13 | 26,293,129 | 26,619,547 | 3 | 2 | 5 | 0 |
| Case 76 | 13 | 26,620,737 | 26,789,127 | 4 | 0 | 4 | 1 |
| Case 76 | 13 | 26,789,231 | 26,789,432 | 2 | 0 | 2 | 1 |
| Case 76 | 13 | 26,789,528 | 27,246,696 | 3 | 2 | 5 | 0 |
| Case 76 | 13 | 27,249,774 | 27,545,444 | 2 | 2 | 4 | 0 |
| Case 76 | 13 | 27,545,885 | 28,286,672 | 3 | 2 | 5 | 0 |
| Case 76 | 13 | 28,293,086 | 28,428,972 | 2 | 2 | 4 | 0 |
| Case 76 | 13 | 28,429,194 | 29,508,318 | 3 | 2 | 5 | 0 |
| Case 76 | 13 | 29,515,875 | 29,749,568 | 2 | 2 | 4 | 0 |
| Case 76 | 13 | 29,754,294 | 29,997,689 | 3 | 2 | 5 | 0 |
| Case 76 | 13 | 30,000,621 | 30,135,331 | 2 | 2 | 4 | 0 |
| Case 76 | 13 | 30,137,828 | 30,439,397 | 3 | 2 | 5 | 0 |
| Case 76 | 13 | 30,442,786 | 30,534,749 | 2 | 2 | 4 | 0 |
| Case 76 | 13 | 30,535,222 | 31,205,365 | 3 | 2 | 5 | 0 |
| Case 76 | 13 | 31,205,536 | 31,698,294 | 2 | 2 | 4 | 0 |
| Case 76 | 13 | 31,702,139 | 32,758,834 | 3 | 2 | 5 | 0 |
| Case 76 | 13 | 32,759,240 | 32,870,906 | 2 | 2 | 4 | 0 |
| Case 76 | 13 | 32,872,177 | 33,555,587 | 3 | 2 | 5 | 0 |
| Case 76 | 13 | 33,557,255 | 33,730,226 | 2 | 2 | 4 | 0 |
| Case 76 | 13 | 33,730,275 | 36,733,380 | 3 | 2 | 5 | 0 |
| Case 76 | 13 | 36,736,953 | 37,010,294 | 2 | 2 | 4 | 0 |
| Case 76 | 13 | 37,011,893 | 39,261,590 | 3 | 2 | 5 | 0 |
| Case 76 | 13 | 39,261,786 | 39,266,540 | 2 | 2 | 4 | 0 |
| Case 76 | 13 | 39,268,845 | 40,976,034 | 3 | 2 | 5 | 0 |
| Case 76 | 13 | 40,977,028 | 41,383,515 | 2 | 2 | 4 | 0 |
| Case 76 | 13 | 41,385,658 | 42,838,908 | 3 | 2 | 5 | 0 |
| Case 76 | 13 | 42,847,434 | 42,877,758 | 3 | 0 | 3 | 1 |
| Case 76 | 13 | 42,877,799 | 42,938,474 | 2 | 0 | 2 | 1 |
| Case 76 | 13 | 42,942,263 | 43,551,645 | 3 | 0 | 3 | 1 |
| Case 76 | 13 | 43,555,170 | 43,681,328 | 2 | 0 | 2 | 1 |
| Case 76 | 13 | 43,681,427 | 44,115,099 | 3 | 0 | 3 | 1 |
| Case 76 | 13 | 44,119,858 | 44,475,514 | 2 | 0 | 2 | 1 |
| Case 76 | 13 | 44,475,821 | 44,981,909 | 3 | 0 | 3 | 1 |
| Case 76 | 13 | 45,000,340 | 45,303,639 | 2 | 0 | 2 | 1 |
| Case 76 | 13 | 45,303,711 | 45,572,614 | 3 | 0 | 3 | 1 |
| Case 76 | 13 | 45,582,765 | 46,157,367 | 2 | 0 | 2 | 1 |
| Case 76 | 13 | 46,158,199 | 47,274,727 | 3 | 0 | 3 | 1 |
| Case 76 | 13 | 47,275,283 | 47,485,121 | 2 | 0 | 2 | 1 |
| Case 76 | 13 | 47,485,570 | 48,446,136 | 3 | 0 | 3 | 1 |
| Case 76 | 13 | 48,452,461 | 48,689,431 | 2 | 0 | 2 | 1 |
| Case 76 | 13 | 48,693,997 | 48,824,387 | 3 | 0 | 3 | 1 |
| Case 76 | 13 | 48,827,810 | 49,433,234 | 2 | 0 | 2 | 1 |
| Case 76 | 13 | 49,434,437 | 49,540,727 | 3 | 0 | 3 | 1 |
| Case 76 | 13 | 49,544,662 | 49,776,080 | 2 | 0 | 2 | 1 |
| Case 76 | 13 | 49,781,232 | 49,933,907 | 3 | 0 | 3 | 1 |
| Case 76 | 13 | 49,934,913 | 50,086,266 | 2 | 0 | 2 | 1 |
| Case 76 | 13 | 50,088,133 | 50,158,142 | 3 | 0 | 3 | 1 |
| Case 76 | 13 | 50,158,939 | 50,842,259 | 2 | 0 | 2 | 1 |
| Case 76 | 13 | 50,846,748 | 51,245,376 | 3 | 0 | 3 | 1 |
| Case 76 | 13 | 51,247,210 | 51,383,266 | 2 | 2 | 4 | 0 |
| Case 76 | 13 | 51,385,422 | 52,379,994 | 3 | 2 | 5 | 0 |
| Case 76 | 13 | 52,383,895 | 53,035,790 | 2 | 2 | 4 | 0 |

|         |    |             |             |   |   |   |   |
|---------|----|-------------|-------------|---|---|---|---|
| Case 76 | 13 | 53,035,899  | 76,357,830  | 3 | 2 | 5 | 0 |
| Case 76 | 13 | 76,358,364  | 76,449,465  | 2 | 2 | 4 | 0 |
| Case 76 | 13 | 76,450,101  | 82,983,494  | 3 | 2 | 5 | 0 |
| Case 76 | 13 | 82,986,268  | 83,588,230  | 4 | 0 | 4 | 1 |
| Case 76 | 13 | 83,593,140  | 84,677,135  | 3 | 0 | 3 | 1 |
| Case 76 | 13 | 84,679,435  | 85,128,145  | 4 | 0 | 4 | 1 |
| Case 76 | 13 | 85,133,674  | 86,444,121  | 3 | 0 | 3 | 1 |
| Case 76 | 13 | 86,447,071  | 86,976,449  | 4 | 0 | 4 | 1 |
| Case 76 | 13 | 86,982,353  | 88,512,587  | 3 | 0 | 3 | 1 |
| Case 76 | 13 | 88,533,669  | 90,900,628  | 4 | 0 | 4 | 1 |
| Case 76 | 13 | 90,900,914  | 91,029,702  | 3 | 0 | 3 | 1 |
| Case 76 | 13 | 91,030,435  | 91,739,401  | 4 | 0 | 4 | 1 |
| Case 76 | 13 | 91,740,377  | 92,372,552  | 3 | 0 | 3 | 1 |
| Case 76 | 13 | 92,374,372  | 92,923,873  | 4 | 0 | 4 | 1 |
| Case 76 | 13 | 92,926,044  | 94,139,382  | 3 | 0 | 3 | 1 |
| Case 76 | 13 | 94,153,194  | 94,188,347  | 4 | 0 | 4 | 1 |
| Case 76 | 13 | 94,189,352  | 94,617,077  | 3 | 0 | 3 | 1 |
| Case 76 | 13 | 94,620,468  | 95,734,990  | 4 | 0 | 4 | 1 |
| Case 76 | 13 | 95,735,502  | 95,853,574  | 3 | 0 | 3 | 1 |
| Case 76 | 13 | 95,853,780  | 95,888,104  | 4 | 0 | 4 | 1 |
| Case 76 | 13 | 95,888,277  | 95,962,578  | 3 | 0 | 3 | 1 |
| Case 76 | 13 | 95,963,788  | 96,237,786  | 4 | 0 | 4 | 1 |
| Case 76 | 13 | 96,238,288  | 97,203,935  | 3 | 0 | 3 | 1 |
| Case 76 | 13 | 97,208,486  | 97,887,383  | 4 | 0 | 4 | 1 |
| Case 76 | 13 | 97,891,187  | 98,304,614  | 3 | 0 | 3 | 1 |
| Case 76 | 13 | 98,308,641  | 99,042,341  | 4 | 0 | 4 | 1 |
| Case 76 | 13 | 99,042,720  | 100,022,758 | 3 | 0 | 3 | 1 |
| Case 76 | 13 | 100,027,957 | 101,147,019 | 4 | 0 | 4 | 1 |
| Case 76 | 13 | 101,151,134 | 101,940,873 | 3 | 0 | 3 | 1 |
| Case 76 | 13 | 101,941,842 | 103,330,718 | 4 | 0 | 4 | 1 |
| Case 76 | 13 | 103,338,230 | 103,528,119 | 3 | 0 | 3 | 1 |
| Case 76 | 13 | 103,528,246 | 103,960,181 | 4 | 0 | 4 | 1 |
| Case 76 | 13 | 103,967,824 | 104,370,742 | 3 | 0 | 3 | 1 |
| Case 76 | 13 | 104,373,617 | 104,816,621 | 4 | 0 | 4 | 1 |
| Case 76 | 13 | 104,818,367 | 107,085,023 | 3 | 0 | 3 | 1 |
| Case 76 | 13 | 107,086,644 | 107,788,025 | 4 | 0 | 4 | 1 |
| Case 76 | 13 | 107,788,872 | 107,939,161 | 3 | 0 | 3 | 1 |
| Case 76 | 13 | 107,939,411 | 108,452,470 | 4 | 0 | 4 | 1 |
| Case 76 | 13 | 108,454,595 | 113,582,130 | 3 | 0 | 3 | 1 |
| Case 76 | 13 | 113,582,441 | 113,703,404 | 4 | 0 | 4 | 1 |
| Case 76 | 13 | 113,703,442 | 115,103,529 | 3 | 0 | 3 | 1 |
| Case 76 | 14 | 19,280,733  | 21,549,854  | 2 | 1 | 3 | 0 |
| Case 76 | 14 | 21,549,893  | 21,571,385  | 1 | 1 | 2 | 0 |
| Case 76 | 14 | 21,573,156  | 23,395,991  | 2 | 1 | 3 | 0 |
| Case 76 | 14 | 23,397,336  | 45,606,301  | 1 | 1 | 2 | 0 |
| Case 76 | 14 | 45,606,387  | 45,696,948  | 1 | 0 | 1 | 0 |
| Case 76 | 14 | 45,699,237  | 53,162,133  | 1 | 1 | 2 | 0 |
| Case 76 | 14 | 53,168,000  | 53,224,593  | 2 | 1 | 3 | 0 |
| Case 76 | 14 | 53,235,651  | 91,896,534  | 1 | 1 | 2 | 0 |
| Case 76 | 14 | 91,914,979  | 92,032,755  | 1 | 0 | 1 | 0 |
| Case 76 | 14 | 92,032,789  | 93,651,992  | 1 | 1 | 2 | 0 |
| Case 76 | 14 | 93,652,681  | 93,652,974  | 2 | 1 | 3 | 0 |
| Case 76 | 14 | 93,656,583  | 107,287,663 | 1 | 1 | 2 | 0 |
| Case 76 | 15 | 20,034,919  | 64,366,507  | 2 | 0 | 2 | 1 |
| Case 76 | 15 | 64,367,745  | 64,367,745  | 1 | 0 | 1 | 0 |
| Case 76 | 15 | 64,381,033  | 64,448,365  | 0 | 0 | 0 | 0 |
| Case 76 | 15 | 64,448,986  | 64,607,472  | 1 | 0 | 1 | 0 |
| Case 76 | 15 | 64,627,303  | 81,178,263  | 2 | 0 | 2 | 1 |
| Case 76 | 15 | 81,179,553  | 87,117,255  | 5 | 0 | 5 | 1 |
| Case 76 | 15 | 87,119,340  | 87,848,502  | 6 | 0 | 6 | 1 |
| Case 76 | 15 | 87,857,559  | 87,857,559  | 2 | 1 | 3 | 0 |



|         |    |             |             |   |   |   |   |
|---------|----|-------------|-------------|---|---|---|---|
| Case 76 | 15 | 87,861,101  | 94,205,530  | 5 | 0 | 5 | 1 |
| Case 76 | 15 | 94,211,856  | 96,343,835  | 6 | 0 | 6 | 1 |
| Case 76 | 15 | 96,343,975  | 96,343,975  | 2 | 1 | 3 | 0 |
| Case 76 | 15 | 96,345,844  | 97,521,010  | 5 | 0 | 5 | 1 |
| Case 76 | 15 | 97,521,191  | 98,870,176  | 6 | 0 | 6 | 1 |
| Case 76 | 15 | 98,870,293  | 98,870,293  | 2 | 1 | 3 | 0 |
| Case 76 | 15 | 98,871,925  | 100,039,553 | 5 | 0 | 5 | 1 |
| Case 76 | 15 | 100,044,888 | 100,267,863 | 6 | 0 | 6 | 1 |
| Case 76 | 15 | 100,269,341 | 102,461,162 | 5 | 0 | 5 | 1 |
| Case 76 | 16 | 88,165      | 5,611,414   | 2 | 0 | 2 | 1 |
| Case 76 | 16 | 5,612,197   | 5,856,462   | 2 | 1 | 3 | 0 |
| Case 76 | 16 | 5,862,420   | 6,456,057   | 2 | 0 | 2 | 1 |
| Case 76 | 16 | 6,456,763   | 6,520,153   | 2 | 1 | 3 | 0 |
| Case 76 | 16 | 6,523,142   | 6,557,003   | 1 | 1 | 2 | 0 |
| Case 76 | 16 | 6,559,062   | 6,565,929   | 1 | 0 | 1 | 0 |
| Case 76 | 16 | 6,567,747   | 6,575,210   | 1 | 1 | 2 | 0 |
| Case 76 | 16 | 6,577,413   | 8,496,035   | 2 | 0 | 2 | 1 |
| Case 76 | 16 | 8,499,511   | 9,436,278   | 2 | 1 | 3 | 0 |
| Case 76 | 16 | 9,436,915   | 9,610,356   | 2 | 0 | 2 | 1 |
| Case 76 | 16 | 9,615,769   | 9,721,637   | 2 | 1 | 3 | 0 |
| Case 76 | 16 | 9,721,951   | 10,322,037  | 2 | 0 | 2 | 1 |
| Case 76 | 16 | 10,324,147  | 12,826,445  | 2 | 1 | 3 | 0 |
| Case 76 | 16 | 12,829,006  | 13,894,030  | 2 | 0 | 2 | 1 |
| Case 76 | 16 | 13,894,417  | 14,430,442  | 2 | 1 | 3 | 0 |
| Case 76 | 16 | 14,431,452  | 14,649,532  | 2 | 0 | 2 | 1 |
| Case 76 | 16 | 14,652,839  | 17,879,988  | 2 | 1 | 3 | 0 |
| Case 76 | 16 | 17,882,019  | 26,621,916  | 2 | 0 | 2 | 1 |
| Case 76 | 16 | 26,639,714  | 26,758,407  | 2 | 1 | 3 | 0 |
| Case 76 | 16 | 26,762,192  | 35,285,582  | 2 | 0 | 2 | 1 |
| Case 76 | 16 | 46,450,037  | 47,684,460  | 2 | 0 | 2 | 1 |
| Case 76 | 16 | 47,684,830  | 49,095,287  | 2 | 1 | 3 | 0 |
| Case 76 | 16 | 49,100,699  | 49,371,873  | 2 | 0 | 2 | 1 |
| Case 76 | 16 | 49,372,805  | 49,914,323  | 2 | 1 | 3 | 0 |
| Case 76 | 16 | 49,916,322  | 50,388,719  | 2 | 0 | 2 | 1 |
| Case 76 | 16 | 50,389,485  | 53,014,002  | 2 | 1 | 3 | 0 |
| Case 76 | 16 | 53,016,064  | 53,331,053  | 2 | 0 | 2 | 1 |
| Case 76 | 16 | 53,337,907  | 53,990,953  | 2 | 1 | 3 | 0 |
| Case 76 | 16 | 53,998,930  | 54,108,698  | 2 | 0 | 2 | 1 |
| Case 76 | 16 | 54,113,607  | 55,536,763  | 2 | 1 | 3 | 0 |
| Case 76 | 16 | 55,536,779  | 55,704,042  | 2 | 0 | 2 | 1 |
| Case 76 | 16 | 55,705,821  | 56,465,425  | 2 | 1 | 3 | 0 |
| Case 76 | 16 | 56,469,011  | 56,944,955  | 2 | 0 | 2 | 1 |
| Case 76 | 16 | 56,945,539  | 56,973,335  | 2 | 1 | 3 | 0 |
| Case 76 | 16 | 56,973,461  | 57,071,166  | 2 | 0 | 2 | 1 |
| Case 76 | 16 | 57,071,963  | 57,542,539  | 2 | 1 | 3 | 0 |
| Case 76 | 16 | 57,543,173  | 57,552,141  | 2 | 0 | 2 | 1 |
| Case 76 | 16 | 57,552,634  | 57,741,426  | 2 | 1 | 3 | 0 |
| Case 76 | 16 | 57,741,527  | 58,293,780  | 2 | 0 | 2 | 1 |
| Case 76 | 16 | 58,295,198  | 59,839,971  | 2 | 1 | 3 | 0 |
| Case 76 | 16 | 59,854,720  | 60,125,785  | 2 | 0 | 2 | 1 |
| Case 76 | 16 | 60,136,254  | 60,870,463  | 2 | 1 | 3 | 0 |
| Case 76 | 16 | 60,870,593  | 60,964,630  | 2 | 0 | 2 | 1 |
| Case 76 | 16 | 60,965,035  | 61,120,981  | 2 | 1 | 3 | 0 |
| Case 76 | 16 | 61,123,147  | 62,428,009  | 2 | 0 | 2 | 1 |
| Case 76 | 16 | 62,456,315  | 62,642,170  | 2 | 1 | 3 | 0 |
| Case 76 | 16 | 62,642,333  | 64,221,018  | 2 | 0 | 2 | 1 |
| Case 76 | 16 | 64,226,202  | 64,425,318  | 2 | 1 | 3 | 0 |
| Case 76 | 16 | 64,434,561  | 64,823,372  | 2 | 0 | 2 | 1 |
| Case 76 | 16 | 64,826,009  | 66,804,115  | 2 | 1 | 3 | 0 |
| Case 76 | 16 | 66,805,034  | 66,919,454  | 2 | 0 | 2 | 1 |
| Case 76 | 16 | 66,919,532  | 66,972,968  | 2 | 1 | 3 | 0 |

|         |    |            |            |   |   |   |   |
|---------|----|------------|------------|---|---|---|---|
| Case 76 | 16 | 66,973,170 | 68,191,796 | 2 | 0 | 2 | 1 |
| Case 76 | 16 | 68,208,336 | 68,380,071 | 2 | 1 | 3 | 0 |
| Case 76 | 16 | 68,380,118 | 70,843,909 | 2 | 0 | 2 | 1 |
| Case 76 | 16 | 70,867,880 | 71,171,147 | 3 | 0 | 3 | 1 |
| Case 76 | 16 | 71,174,886 | 90,274,695 | 2 | 0 | 2 | 1 |
| Case 76 | 17 | 11,885     | 11,711,183 | 2 | 0 | 2 | 1 |
| Case 76 | 17 | 11,712,491 | 11,833,287 | 1 | 0 | 1 | 0 |
| Case 76 | 17 | 11,835,078 | 11,843,782 | 1 | 1 | 2 | 0 |
| Case 76 | 17 | 11,845,741 | 11,941,483 | 1 | 0 | 1 | 0 |
| Case 76 | 17 | 11,943,701 | 22,242,355 | 2 | 0 | 2 | 1 |
| Case 76 | 17 | 25,268,142 | 25,295,032 | 2 | 0 | 2 | 1 |
| Case 76 | 17 | 25,329,949 | 40,656,043 | 2 | 1 | 3 | 0 |
| Case 76 | 17 | 40,658,657 | 40,757,489 | 1 | 1 | 2 | 0 |
| Case 76 | 17 | 40,759,937 | 48,046,963 | 2 | 1 | 3 | 0 |
| Case 76 | 17 | 48,047,109 | 48,149,445 | 3 | 1 | 4 | 0 |
| Case 76 | 17 | 48,149,503 | 51,945,447 | 2 | 1 | 3 | 0 |
| Case 76 | 17 | 51,975,256 | 52,646,414 | 2 | 0 | 2 | 1 |
| Case 76 | 17 | 52,679,090 | 67,120,025 | 2 | 1 | 3 | 0 |
| Case 76 | 17 | 67,121,109 | 67,153,386 | 1 | 0 | 1 | 0 |
| Case 76 | 17 | 67,161,107 | 70,454,391 | 2 | 1 | 3 | 0 |
| Case 76 | 17 | 70,460,351 | 70,522,932 | 1 | 1 | 2 | 0 |
| Case 76 | 17 | 70,533,218 | 78,319,552 | 2 | 1 | 3 | 0 |
| Case 76 | 17 | 78,319,718 | 78,338,303 | 2 | 0 | 2 | 1 |
| Case 76 | 17 | 78,341,776 | 79,375,998 | 2 | 1 | 3 | 0 |
| Case 76 | 17 | 79,380,547 | 79,433,106 | 2 | 0 | 2 | 1 |
| Case 76 | 17 | 79,441,807 | 81,060,040 | 2 | 1 | 3 | 0 |
| Case 76 | 18 | 87,505     | 1,134,695  | 2 | 0 | 2 | 1 |
| Case 76 | 18 | 1,143,496  | 1,631,465  | 3 | 0 | 3 | 1 |
| Case 76 | 18 | 1,635,748  | 3,171,473  | 4 | 0 | 4 | 1 |
| Case 76 | 18 | 3,173,950  | 3,316,176  | 2 | 0 | 2 | 1 |
| Case 76 | 18 | 3,319,380  | 3,746,791  | 1 | 0 | 1 | 0 |
| Case 76 | 18 | 3,747,619  | 6,371,311  | 2 | 0 | 2 | 1 |
| Case 76 | 18 | 6,376,918  | 6,468,735  | 4 | 0 | 4 | 1 |
| Case 76 | 18 | 6,474,496  | 6,662,650  | 3 | 0 | 3 | 1 |
| Case 76 | 18 | 6,666,204  | 7,697,053  | 4 | 0 | 4 | 1 |
| Case 76 | 18 | 7,704,830  | 8,413,517  | 2 | 0 | 2 | 1 |
| Case 76 | 18 | 8,413,996  | 8,602,839  | 1 | 0 | 1 | 0 |
| Case 76 | 18 | 8,604,386  | 9,006,277  | 2 | 0 | 2 | 1 |
| Case 76 | 18 | 9,009,311  | 9,092,233  | 2 | 2 | 4 | 0 |
| Case 76 | 18 | 9,095,067  | 15,375,878 | 2 | 1 | 3 | 0 |
| Case 76 | 18 | 18,520,354 | 19,954,143 | 2 | 1 | 3 | 0 |
| Case 76 | 18 | 19,984,669 | 21,152,116 | 2 | 2 | 4 | 0 |
| Case 76 | 18 | 21,153,416 | 22,209,970 | 4 | 1 | 5 | 0 |
| Case 76 | 18 | 22,212,190 | 22,330,488 | 2 | 2 | 4 | 0 |
| Case 76 | 18 | 22,330,670 | 22,653,562 | 4 | 1 | 5 | 0 |
| Case 76 | 18 | 22,656,876 | 22,860,846 | 2 | 2 | 4 | 0 |
| Case 76 | 18 | 22,861,794 | 22,994,310 | 2 | 1 | 3 | 0 |
| Case 76 | 18 | 23,000,716 | 23,421,693 | 2 | 0 | 2 | 1 |
| Case 76 | 18 | 23,423,078 | 23,453,098 | 2 | 1 | 3 | 0 |
| Case 76 | 18 | 23,453,973 | 23,716,903 | 2 | 0 | 2 | 1 |
| Case 76 | 18 | 23,724,560 | 24,471,991 | 2 | 1 | 3 | 0 |
| Case 76 | 18 | 24,479,562 | 24,509,467 | 2 | 0 | 2 | 1 |
| Case 76 | 18 | 24,509,993 | 25,016,255 | 2 | 1 | 3 | 0 |
| Case 76 | 18 | 25,023,637 | 25,976,828 | 2 | 0 | 2 | 1 |
| Case 76 | 18 | 25,978,719 | 28,722,039 | 2 | 2 | 4 | 0 |
| Case 76 | 18 | 28,722,103 | 28,828,139 | 2 | 1 | 3 | 0 |
| Case 76 | 18 | 28,832,838 | 28,989,486 | 2 | 2 | 4 | 0 |
| Case 76 | 18 | 28,991,061 | 29,056,101 | 2 | 1 | 3 | 0 |
| Case 76 | 18 | 29,056,115 | 29,463,735 | 2 | 2 | 4 | 0 |
| Case 76 | 18 | 29,471,317 | 29,776,682 | 3 | 2 | 5 | 0 |
| Case 76 | 18 | 29,778,090 | 30,488,989 | 3 | 1 | 4 | 0 |

|         |    |            |            |   |   |   |   |
|---------|----|------------|------------|---|---|---|---|
| Case 76 | 18 | 30,497,848 | 30,497,848 | 2 | 0 | 2 | 1 |
| Case 76 | 18 | 30,498,621 | 31,284,008 | 3 | 2 | 5 | 0 |
| Case 76 | 18 | 31,285,269 | 33,648,433 | 2 | 2 | 4 | 0 |
| Case 76 | 18 | 33,648,719 | 33,747,114 | 3 | 2 | 5 | 0 |
| Case 76 | 18 | 33,749,871 | 34,310,709 | 3 | 1 | 4 | 0 |
| Case 76 | 18 | 34,311,643 | 34,705,747 | 2 | 1 | 3 | 0 |
| Case 76 | 18 | 34,721,688 | 37,050,684 | 2 | 2 | 4 | 0 |
| Case 76 | 18 | 37,069,312 | 37,426,339 | 2 | 1 | 3 | 0 |
| Case 76 | 18 | 37,428,034 | 40,276,736 | 2 | 2 | 4 | 0 |
| Case 76 | 18 | 40,281,222 | 40,543,077 | 2 | 1 | 3 | 0 |
| Case 76 | 18 | 40,543,412 | 43,028,119 | 2 | 2 | 4 | 0 |
| Case 76 | 18 | 43,028,130 | 43,224,125 | 2 | 1 | 3 | 0 |
| Case 76 | 18 | 43,226,440 | 43,438,592 | 2 | 2 | 4 | 0 |
| Case 76 | 18 | 43,438,605 | 43,562,102 | 2 | 1 | 3 | 0 |
| Case 76 | 18 | 43,566,304 | 43,664,115 | 2 | 2 | 4 | 0 |
| Case 76 | 18 | 43,666,424 | 43,878,311 | 2 | 1 | 3 | 0 |
| Case 76 | 18 | 43,878,459 | 44,057,151 | 2 | 2 | 4 | 0 |
| Case 76 | 18 | 44,057,673 | 44,206,952 | 2 | 1 | 3 | 0 |
| Case 76 | 18 | 44,210,118 | 44,396,917 | 2 | 2 | 4 | 0 |
| Case 76 | 18 | 44,397,488 | 44,561,110 | 2 | 1 | 3 | 0 |
| Case 76 | 18 | 44,561,124 | 44,990,887 | 2 | 2 | 4 | 0 |
| Case 76 | 18 | 44,990,971 | 45,157,181 | 2 | 1 | 3 | 0 |
| Case 76 | 18 | 45,162,662 | 46,312,580 | 3 | 1 | 4 | 0 |
| Case 76 | 18 | 46,312,868 | 46,749,155 | 2 | 2 | 4 | 0 |
| Case 76 | 18 | 46,770,186 | 46,798,603 | 3 | 2 | 5 | 0 |
| Case 76 | 18 | 46,801,497 | 47,230,431 | 3 | 1 | 4 | 0 |
| Case 76 | 18 | 47,243,912 | 47,354,324 | 2 | 2 | 4 | 0 |
| Case 76 | 18 | 47,358,751 | 47,502,338 | 2 | 1 | 3 | 0 |
| Case 76 | 18 | 47,503,415 | 47,618,562 | 2 | 2 | 4 | 0 |
| Case 76 | 18 | 47,626,136 | 47,635,466 | 2 | 1 | 3 | 0 |
| Case 76 | 18 | 47,638,056 | 48,000,015 | 3 | 1 | 4 | 0 |
| Case 76 | 18 | 48,001,632 | 48,218,823 | 2 | 2 | 4 | 0 |
| Case 76 | 18 | 48,220,529 | 78,015,180 | 2 | 0 | 2 | 1 |
| Case 76 | 19 | 260,912    | 288,374    | 1 | 0 | 1 | 0 |
| Case 76 | 19 | 288,738    | 326,527    | 0 | 0 | 0 | 0 |
| Case 76 | 19 | 327,182    | 327,920    | 1 | 0 | 1 | 0 |
| Case 76 | 19 | 334,440    | 364,695    | 0 | 0 | 0 | 0 |
| Case 76 | 19 | 366,451    | 375,835    | 1 | 0 | 1 | 0 |
| Case 76 | 19 | 375,849    | 438,830    | 0 | 0 | 0 | 0 |
| Case 76 | 19 | 440,874    | 446,887    | 1 | 0 | 1 | 0 |
| Case 76 | 19 | 454,430    | 21,393,187 | 2 | 0 | 2 | 1 |
| Case 76 | 19 | 21,419,141 | 21,976,964 | 2 | 2 | 4 | 0 |
| Case 76 | 19 | 21,982,352 | 24,629,285 | 2 | 1 | 3 | 0 |
| Case 76 | 19 | 27,732,159 | 27,919,724 | 2 | 1 | 3 | 0 |
| Case 76 | 19 | 27,928,613 | 28,898,063 | 2 | 2 | 4 | 0 |
| Case 76 | 19 | 28,898,556 | 29,023,710 | 2 | 1 | 3 | 0 |
| Case 76 | 19 | 29,028,991 | 29,525,811 | 2 | 2 | 4 | 0 |
| Case 76 | 19 | 29,526,586 | 29,678,680 | 2 | 1 | 3 | 0 |
| Case 76 | 19 | 29,679,198 | 30,164,574 | 2 | 2 | 4 | 0 |
| Case 76 | 19 | 30,164,754 | 30,620,082 | 2 | 1 | 3 | 0 |
| Case 76 | 19 | 30,623,462 | 30,926,872 | 2 | 2 | 4 | 0 |
| Case 76 | 19 | 30,928,637 | 31,178,994 | 2 | 1 | 3 | 0 |
| Case 76 | 19 | 31,180,590 | 31,708,031 | 2 | 2 | 4 | 0 |
| Case 76 | 19 | 31,715,766 | 31,812,172 | 2 | 1 | 3 | 0 |
| Case 76 | 19 | 31,816,779 | 32,692,833 | 2 | 2 | 4 | 0 |
| Case 76 | 19 | 32,707,538 | 33,119,742 | 2 | 1 | 3 | 0 |
| Case 76 | 19 | 33,122,886 | 33,355,069 | 2 | 2 | 4 | 0 |
| Case 76 | 19 | 33,355,112 | 33,493,852 | 2 | 1 | 3 | 0 |
| Case 76 | 19 | 33,498,943 | 33,579,128 | 2 | 2 | 4 | 0 |
| Case 76 | 19 | 33,579,157 | 33,713,928 | 2 | 1 | 3 | 0 |
| Case 76 | 19 | 33,714,369 | 33,782,911 | 2 | 2 | 4 | 0 |

|         |    |            |            |   |   |   |   |
|---------|----|------------|------------|---|---|---|---|
| Case 76 | 19 | 33,789,128 | 33,878,884 | 2 | 1 | 3 | 0 |
| Case 76 | 19 | 33,878,977 | 34,145,361 | 2 | 2 | 4 | 0 |
| Case 76 | 19 | 34,150,760 | 34,985,466 | 2 | 1 | 3 | 0 |
| Case 76 | 19 | 34,987,380 | 35,410,798 | 2 | 2 | 4 | 0 |
| Case 76 | 19 | 35,416,794 | 36,834,184 | 2 | 1 | 3 | 0 |
| Case 76 | 19 | 36,853,100 | 37,488,499 | 2 | 2 | 4 | 0 |
| Case 76 | 19 | 37,490,376 | 40,199,948 | 2 | 1 | 3 | 0 |
| Case 76 | 19 | 40,217,794 | 40,237,360 | 2 | 0 | 2 | 1 |
| Case 76 | 19 | 40,240,034 | 40,316,422 | 2 | 2 | 4 | 0 |
| Case 76 | 19 | 40,316,461 | 41,309,240 | 2 | 1 | 3 | 0 |
| Case 76 | 19 | 41,310,571 | 41,508,744 | 2 | 2 | 4 | 0 |
| Case 76 | 19 | 41,510,030 | 44,792,651 | 2 | 1 | 3 | 0 |
| Case 76 | 19 | 44,792,701 | 45,107,156 | 2 | 2 | 4 | 0 |
| Case 76 | 19 | 45,110,320 | 52,272,840 | 2 | 1 | 3 | 0 |
| Case 76 | 19 | 52,273,257 | 52,851,985 | 2 | 2 | 4 | 0 |
| Case 76 | 19 | 52,852,469 | 53,454,168 | 2 | 1 | 3 | 0 |
| Case 76 | 19 | 53,454,237 | 54,294,482 | 2 | 2 | 4 | 0 |
| Case 76 | 19 | 54,296,771 | 56,736,269 | 2 | 1 | 3 | 0 |
| Case 76 | 19 | 56,741,186 | 57,027,720 | 2 | 2 | 4 | 0 |
| Case 76 | 19 | 57,027,762 | 57,407,350 | 2 | 1 | 3 | 0 |
| Case 76 | 19 | 57,409,367 | 57,642,782 | 2 | 2 | 4 | 0 |
| Case 76 | 19 | 57,643,051 | 58,194,388 | 2 | 1 | 3 | 0 |
| Case 76 | 19 | 58,194,405 | 59,097,160 | 2 | 2 | 4 | 0 |
| Case 76 | 20 | 63,244     | 1,016,990  | 1 | 1 | 2 | 0 |
| Case 76 | 20 | 1,018,057  | 1,039,999  | 2 | 1 | 3 | 0 |
| Case 76 | 20 | 1,040,861  | 1,367,535  | 1 | 1 | 2 | 0 |
| Case 76 | 20 | 1,369,430  | 1,485,913  | 2 | 1 | 3 | 0 |
| Case 76 | 20 | 1,492,420  | 1,813,373  | 1 | 1 | 2 | 0 |
| Case 76 | 20 | 1,815,620  | 1,925,837  | 2 | 1 | 3 | 0 |
| Case 76 | 20 | 1,927,336  | 4,048,021  | 1 | 1 | 2 | 0 |
| Case 76 | 20 | 4,049,804  | 4,430,901  | 2 | 1 | 3 | 0 |
| Case 76 | 20 | 4,432,967  | 4,657,017  | 1 | 1 | 2 | 0 |
| Case 76 | 20 | 4,665,262  | 4,759,039  | 2 | 1 | 3 | 0 |
| Case 76 | 20 | 4,759,396  | 5,096,134  | 1 | 1 | 2 | 0 |
| Case 76 | 20 | 5,099,636  | 5,466,940  | 2 | 1 | 3 | 0 |
| Case 76 | 20 | 5,467,063  | 5,649,186  | 1 | 1 | 2 | 0 |
| Case 76 | 20 | 5,649,902  | 5,727,600  | 2 | 1 | 3 | 0 |
| Case 76 | 20 | 5,728,237  | 6,759,585  | 5 | 0 | 5 | 1 |
| Case 76 | 20 | 6,760,201  | 9,462,537  | 6 | 0 | 6 | 1 |
| Case 76 | 20 | 9,463,254  | 9,463,254  | 2 | 1 | 3 | 0 |
| Case 76 | 20 | 9,467,046  | 13,866,024 | 5 | 0 | 5 | 1 |
| Case 76 | 20 | 13,866,968 | 14,303,281 | 6 | 0 | 6 | 1 |
| Case 76 | 20 | 14,306,361 | 14,306,773 | 2 | 1 | 3 | 0 |
| Case 76 | 20 | 14,306,896 | 14,723,009 | 5 | 0 | 5 | 1 |
| Case 76 | 20 | 14,724,600 | 14,847,907 | 4 | 0 | 4 | 1 |
| Case 76 | 20 | 14,853,050 | 14,853,050 | 1 | 1 | 2 | 0 |
| Case 76 | 20 | 14,858,910 | 15,007,064 | 1 | 0 | 1 | 0 |
| Case 76 | 20 | 15,007,730 | 15,088,585 | 1 | 1 | 2 | 0 |
| Case 76 | 20 | 15,096,705 | 15,109,608 | 1 | 0 | 1 | 0 |
| Case 76 | 20 | 15,110,701 | 15,135,938 | 2 | 0 | 2 | 1 |
| Case 76 | 20 | 15,139,048 | 15,472,381 | 5 | 0 | 5 | 1 |
| Case 76 | 20 | 15,474,506 | 15,654,842 | 6 | 0 | 6 | 1 |
| Case 76 | 20 | 15,655,604 | 15,655,604 | 2 | 1 | 3 | 0 |
| Case 76 | 20 | 15,657,202 | 15,967,794 | 3 | 1 | 4 | 0 |
| Case 76 | 20 | 15,967,795 | 15,967,795 | 2 | 0 | 2 | 1 |
| Case 76 | 20 | 15,969,603 | 16,009,257 | 4 | 1 | 5 | 0 |
| Case 76 | 20 | 16,014,926 | 26,293,985 | 5 | 0 | 5 | 1 |
| Case 76 | 20 | 29,425,357 | 42,087,454 | 5 | 0 | 5 | 1 |
| Case 76 | 20 | 42,088,552 | 42,383,192 | 4 | 0 | 4 | 1 |
| Case 76 | 20 | 42,384,469 | 51,869,389 | 5 | 0 | 5 | 1 |
| Case 76 | 20 | 51,870,106 | 51,881,039 | 4 | 0 | 4 | 1 |

|         |    |             |             |   |   |   |   |
|---------|----|-------------|-------------|---|---|---|---|
| Case 76 | 20 | 51,884,213  | 54,941,140  | 5 | 0 | 5 | 1 |
| Case 76 | 20 | 54,941,161  | 55,041,457  | 4 | 0 | 4 | 1 |
| Case 76 | 20 | 55,042,742  | 55,941,872  | 5 | 0 | 5 | 1 |
| Case 76 | 20 | 55,944,679  | 56,190,060  | 4 | 0 | 4 | 1 |
| Case 76 | 20 | 56,190,616  | 58,413,101  | 5 | 0 | 5 | 1 |
| Case 76 | 20 | 58,416,428  | 58,502,648  | 6 | 0 | 6 | 1 |
| Case 76 | 20 | 58,511,286  | 58,514,445  | 2 | 1 | 3 | 0 |
| Case 76 | 20 | 58,514,466  | 59,822,993  | 5 | 0 | 5 | 1 |
| Case 76 | 20 | 59,823,754  | 60,890,262  | 4 | 0 | 4 | 1 |
| Case 76 | 20 | 60,890,375  | 61,186,388  | 5 | 0 | 5 | 1 |
| Case 76 | 20 | 61,204,813  | 61,758,917  | 4 | 0 | 4 | 1 |
| Case 76 | 20 | 61,759,067  | 62,595,990  | 5 | 0 | 5 | 1 |
| Case 76 | 20 | 62,597,666  | 62,948,788  | 4 | 0 | 4 | 1 |
| Case 76 | 21 | 10,827,533  | 10,971,337  | 1 | 1 | 2 | 0 |
| Case 76 | 21 | 14,368,320  | 32,972,257  | 1 | 1 | 2 | 0 |
| Case 76 | 21 | 32,975,321  | 33,073,663  | 1 | 0 | 1 | 0 |
| Case 76 | 21 | 33,078,925  | 47,838,182  | 1 | 1 | 2 | 0 |
| Case 76 | 21 | 47,841,899  | 48,100,155  | 2 | 0 | 2 | 1 |
| Case 76 | 22 | 16,114,244  | 34,212,201  | 3 | 0 | 3 | 1 |
| Case 76 | 22 | 34,212,294  | 34,212,294  | 2 | 1 | 3 | 0 |
| Case 76 | 22 | 34,215,782  | 34,253,393  | 1 | 0 | 1 | 0 |
| Case 76 | 22 | 34,257,133  | 34,263,325  | 2 | 0 | 2 | 1 |
| Case 76 | 22 | 34,266,265  | 42,276,724  | 3 | 0 | 3 | 1 |
| Case 76 | 22 | 42,276,742  | 42,611,265  | 2 | 0 | 2 | 1 |
| Case 76 | 22 | 42,612,297  | 47,038,081  | 3 | 0 | 3 | 1 |
| Case 76 | 22 | 47,056,556  | 51,195,728  | 2 | 0 | 2 | 1 |
| Case 77 | 1  | 82,154      | 16,359,717  | 2 | 1 | 3 | 0 |
| Case 77 | 1  | 16,367,339  | 16,382,201  | 3 | 1 | 4 | 0 |
| Case 77 | 1  | 16,382,916  | 87,062,201  | 2 | 1 | 3 | 0 |
| Case 77 | 1  | 87,085,266  | 87,259,306  | 3 | 1 | 4 | 0 |
| Case 77 | 1  | 87,277,974  | 89,246,897  | 2 | 1 | 3 | 0 |
| Case 77 | 1  | 89,257,378  | 89,257,378  | 3 | 2 | 5 | 0 |
| Case 77 | 1  | 89,265,248  | 89,299,123  | 7 | 0 | 7 | 1 |
| Case 77 | 1  | 89,302,955  | 89,302,955  | 4 | 1 | 5 | 0 |
| Case 77 | 1  | 89,306,817  | 89,306,817  | 2 | 0 | 2 | 1 |
| Case 77 | 1  | 89,317,150  | 121,346,616 | 2 | 1 | 3 | 0 |
| Case 77 | 1  | 142,649,718 | 146,786,080 | 2 | 1 | 3 | 0 |
| Case 77 | 1  | 146,791,729 | 147,241,723 | 3 | 1 | 4 | 0 |
| Case 77 | 1  | 147,244,441 | 151,263,315 | 2 | 1 | 3 | 0 |
| Case 77 | 1  | 151,263,397 | 151,357,333 | 3 | 1 | 4 | 0 |
| Case 77 | 1  | 151,371,305 | 156,845,431 | 2 | 1 | 3 | 0 |
| Case 77 | 1  | 156,845,892 | 157,276,277 | 3 | 1 | 4 | 0 |
| Case 77 | 1  | 157,276,464 | 157,891,709 | 2 | 1 | 3 | 0 |
| Case 77 | 1  | 157,907,476 | 157,977,753 | 3 | 1 | 4 | 0 |
| Case 77 | 1  | 157,982,579 | 158,916,918 | 2 | 1 | 3 | 0 |
| Case 77 | 1  | 158,918,264 | 159,723,619 | 3 | 1 | 4 | 0 |
| Case 77 | 1  | 159,726,123 | 160,817,834 | 2 | 1 | 3 | 0 |
| Case 77 | 1  | 160,823,363 | 161,068,428 | 3 | 1 | 4 | 0 |
| Case 77 | 1  | 161,068,441 | 161,647,270 | 2 | 1 | 3 | 0 |
| Case 77 | 1  | 161,653,708 | 164,419,479 | 3 | 1 | 4 | 0 |
| Case 77 | 1  | 164,421,385 | 164,594,891 | 2 | 1 | 3 | 0 |
| Case 77 | 1  | 164,595,489 | 165,020,001 | 3 | 1 | 4 | 0 |
| Case 77 | 1  | 165,025,758 | 165,133,691 | 2 | 1 | 3 | 0 |
| Case 77 | 1  | 165,135,937 | 165,502,862 | 3 | 1 | 4 | 0 |
| Case 77 | 1  | 165,504,912 | 166,087,578 | 2 | 1 | 3 | 0 |
| Case 77 | 1  | 166,090,139 | 167,618,170 | 3 | 1 | 4 | 0 |
| Case 77 | 1  | 167,620,474 | 168,205,991 | 2 | 1 | 3 | 0 |
| Case 77 | 1  | 168,211,282 | 169,113,282 | 3 | 1 | 4 | 0 |
| Case 77 | 1  | 169,115,833 | 170,129,827 | 2 | 1 | 3 | 0 |
| Case 77 | 1  | 170,131,293 | 170,959,067 | 3 | 1 | 4 | 0 |
| Case 77 | 1  | 170,959,137 | 171,173,160 | 2 | 1 | 3 | 0 |

|         |   |             |             |   |   |   |   |
|---------|---|-------------|-------------|---|---|---|---|
| Case 77 | 1 | 171,173,242 | 171,501,752 | 3 | 1 | 4 | 0 |
| Case 77 | 1 | 171,504,600 | 171,608,466 | 2 | 1 | 3 | 0 |
| Case 77 | 1 | 171,612,267 | 172,175,115 | 3 | 1 | 4 | 0 |
| Case 77 | 1 | 172,180,396 | 172,852,118 | 2 | 1 | 3 | 0 |
| Case 77 | 1 | 172,852,403 | 182,993,159 | 3 | 1 | 4 | 0 |
| Case 77 | 1 | 183,018,062 | 204,438,643 | 2 | 1 | 3 | 0 |
| Case 77 | 1 | 204,438,708 | 207,418,996 | 2 | 0 | 2 | 1 |
| Case 77 | 1 | 207,440,851 | 207,512,742 | 3 | 0 | 3 | 1 |
| Case 77 | 1 | 207,524,541 | 226,292,385 | 2 | 0 | 2 | 1 |
| Case 77 | 1 | 226,292,585 | 228,399,519 | 2 | 1 | 3 | 0 |
| Case 77 | 1 | 228,399,551 | 228,465,346 | 2 | 0 | 2 | 1 |
| Case 77 | 1 | 228,465,370 | 228,465,516 | 2 | 1 | 3 | 0 |
| Case 77 | 1 | 228,465,550 | 228,487,853 | 3 | 0 | 3 | 1 |
| Case 77 | 1 | 228,491,633 | 228,805,855 | 2 | 0 | 2 | 1 |
| Case 77 | 1 | 228,818,506 | 234,909,298 | 2 | 1 | 3 | 0 |
| Case 77 | 1 | 234,956,342 | 235,001,591 | 3 | 1 | 4 | 0 |
| Case 77 | 1 | 235,007,056 | 235,069,505 | 4 | 0 | 4 | 1 |
| Case 77 | 1 | 235,072,837 | 235,290,922 | 3 | 0 | 3 | 1 |
| Case 77 | 1 | 235,294,115 | 235,505,621 | 2 | 0 | 2 | 1 |
| Case 77 | 1 | 235,505,849 | 247,150,582 | 2 | 1 | 3 | 0 |
| Case 77 | 1 | 247,150,739 | 247,207,285 | 2 | 0 | 2 | 1 |
| Case 77 | 1 | 247,226,344 | 249,218,992 | 2 | 1 | 3 | 0 |
| Case 77 | 2 | 18,674      | 20,233,014  | 2 | 1 | 3 | 0 |
| Case 77 | 2 | 20,233,135  | 20,449,068  | 3 | 1 | 4 | 0 |
| Case 77 | 2 | 20,449,174  | 42,164,215  | 2 | 1 | 3 | 0 |
| Case 77 | 2 | 42,165,462  | 42,165,462  | 2 | 2 | 4 | 0 |
| Case 77 | 2 | 42,171,309  | 42,214,495  | 5 | 1 | 6 | 0 |
| Case 77 | 2 | 42,227,952  | 42,301,771  | 2 | 2 | 4 | 0 |
| Case 77 | 2 | 42,306,071  | 42,372,986  | 5 | 1 | 6 | 0 |
| Case 77 | 2 | 42,373,747  | 42,398,473  | 2 | 2 | 4 | 0 |
| Case 77 | 2 | 42,398,918  | 46,590,791  | 3 | 1 | 4 | 0 |
| Case 77 | 2 | 46,591,498  | 46,851,025  | 2 | 1 | 3 | 0 |
| Case 77 | 2 | 46,852,033  | 51,643,185  | 3 | 1 | 4 | 0 |
| Case 77 | 2 | 51,643,322  | 52,264,050  | 2 | 1 | 3 | 0 |
| Case 77 | 2 | 52,264,332  | 58,765,789  | 3 | 1 | 4 | 0 |
| Case 77 | 2 | 58,767,826  | 92,081,640  | 2 | 1 | 3 | 0 |
| Case 77 | 2 | 95,429,424  | 169,511,104 | 2 | 1 | 3 | 0 |
| Case 77 | 2 | 169,516,830 | 173,117,510 | 1 | 1 | 2 | 0 |
| Case 77 | 2 | 173,118,509 | 173,338,939 | 2 | 1 | 3 | 0 |
| Case 77 | 2 | 173,339,808 | 179,393,898 | 1 | 1 | 2 | 0 |
| Case 77 | 2 | 179,394,776 | 179,400,130 | 3 | 0 | 3 | 1 |
| Case 77 | 2 | 179,400,895 | 179,427,560 | 2 | 0 | 2 | 1 |
| Case 77 | 2 | 179,427,580 | 179,455,631 | 2 | 1 | 3 | 0 |
| Case 77 | 2 | 179,455,731 | 242,738,488 | 1 | 1 | 2 | 0 |
| Case 77 | 2 | 242,741,222 | 242,743,532 | 3 | 0 | 3 | 1 |
| Case 77 | 2 | 242,743,943 | 242,873,800 | 2 | 1 | 3 | 0 |
| Case 77 | 2 | 242,917,734 | 243,048,760 | 1 | 1 | 2 | 0 |
| Case 77 | 3 | 61,495      | 10,138,189  | 2 | 1 | 3 | 0 |
| Case 77 | 3 | 10,140,115  | 10,168,785  | 3 | 1 | 4 | 0 |
| Case 77 | 3 | 10,169,819  | 22,033,071  | 2 | 1 | 3 | 0 |
| Case 77 | 3 | 22,037,999  | 59,788,967  | 1 | 1 | 2 | 0 |
| Case 77 | 3 | 59,789,058  | 59,789,058  | 3 | 0 | 3 | 1 |
| Case 77 | 3 | 59,789,614  | 59,810,867  | 2 | 0 | 2 | 1 |
| Case 77 | 3 | 59,811,462  | 59,933,791  | 1 | 0 | 1 | 0 |
| Case 77 | 3 | 59,935,451  | 59,981,976  | 2 | 0 | 2 | 1 |
| Case 77 | 3 | 59,982,040  | 60,040,105  | 1 | 0 | 1 | 0 |
| Case 77 | 3 | 60,047,076  | 60,069,828  | 2 | 0 | 2 | 1 |
| Case 77 | 3 | 60,070,931  | 60,086,281  | 2 | 1 | 3 | 0 |
| Case 77 | 3 | 60,087,817  | 64,072,872  | 1 | 1 | 2 | 0 |
| Case 77 | 3 | 64,074,794  | 64,074,794  | 3 | 0 | 3 | 1 |
| Case 77 | 3 | 64,078,009  | 64,120,052  | 2 | 0 | 2 | 1 |

|         |   |             |             |   |   |   |   |
|---------|---|-------------|-------------|---|---|---|---|
| Case 77 | 3 | 64,121,290  | 64,160,232  | 1 | 0 | 1 | 0 |
| Case 77 | 3 | 64,161,259  | 64,272,923  | 2 | 0 | 2 | 1 |
| Case 77 | 3 | 64,274,183  | 64,274,183  | 2 | 1 | 3 | 0 |
| Case 77 | 3 | 64,274,574  | 64,277,472  | 2 | 0 | 2 | 1 |
| Case 77 | 3 | 64,279,458  | 90,442,925  | 1 | 1 | 2 | 0 |
| Case 77 | 3 | 93,537,290  | 193,426,056 | 1 | 1 | 2 | 0 |
| Case 77 | 3 | 193,427,781 | 193,444,413 | 3 | 0 | 3 | 1 |
| Case 77 | 3 | 193,449,406 | 193,449,406 | 2 | 1 | 3 | 0 |
| Case 77 | 3 | 193,451,757 | 193,455,574 | 3 | 1 | 4 | 0 |
| Case 77 | 3 | 193,464,213 | 193,801,183 | 2 | 1 | 3 | 0 |
| Case 77 | 3 | 193,806,588 | 197,838,262 | 1 | 1 | 2 | 0 |
| Case 77 | 4 | 71,566      | 15,724,520  | 2 | 0 | 2 | 1 |
| Case 77 | 4 | 15,725,766  | 16,105,431  | 3 | 0 | 3 | 1 |
| Case 77 | 4 | 16,107,125  | 23,730,887  | 2 | 0 | 2 | 1 |
| Case 77 | 4 | 23,732,218  | 23,863,873  | 3 | 0 | 3 | 1 |
| Case 77 | 4 | 23,864,412  | 24,064,404  | 2 | 0 | 2 | 1 |
| Case 77 | 4 | 24,067,146  | 24,143,686  | 3 | 0 | 3 | 1 |
| Case 77 | 4 | 24,144,512  | 24,992,827  | 2 | 0 | 2 | 1 |
| Case 77 | 4 | 24,994,457  | 25,107,115  | 3 | 0 | 3 | 1 |
| Case 77 | 4 | 25,113,048  | 25,705,912  | 2 | 0 | 2 | 1 |
| Case 77 | 4 | 25,707,422  | 25,707,422  | 3 | 0 | 3 | 1 |
| Case 77 | 4 | 25,717,754  | 25,734,246  | 0 | 0 | 0 | 0 |
| Case 77 | 4 | 25,740,206  | 38,402,111  | 2 | 0 | 2 | 1 |
| Case 77 | 4 | 38,404,964  | 38,690,647  | 3 | 0 | 3 | 1 |
| Case 77 | 4 | 38,690,677  | 49,620,898  | 2 | 0 | 2 | 1 |
| Case 77 | 4 | 52,697,856  | 54,393,115  | 2 | 0 | 2 | 1 |
| Case 77 | 4 | 54,394,093  | 54,517,724  | 3 | 0 | 3 | 1 |
| Case 77 | 4 | 54,524,939  | 55,604,940  | 2 | 0 | 2 | 1 |
| Case 77 | 4 | 55,606,427  | 56,030,182  | 3 | 0 | 3 | 1 |
| Case 77 | 4 | 56,038,620  | 75,667,398  | 2 | 0 | 2 | 1 |
| Case 77 | 4 | 75,668,334  | 76,137,551  | 3 | 0 | 3 | 1 |
| Case 77 | 4 | 76,138,373  | 78,098,806  | 2 | 0 | 2 | 1 |
| Case 77 | 4 | 78,103,458  | 78,513,987  | 3 | 0 | 3 | 1 |
| Case 77 | 4 | 78,521,525  | 79,048,490  | 2 | 0 | 2 | 1 |
| Case 77 | 4 | 79,052,851  | 79,229,302  | 3 | 0 | 3 | 1 |
| Case 77 | 4 | 79,229,609  | 90,171,147  | 2 | 0 | 2 | 1 |
| Case 77 | 4 | 90,171,162  | 90,373,435  | 3 | 0 | 3 | 1 |
| Case 77 | 4 | 90,374,397  | 119,875,492 | 2 | 0 | 2 | 1 |
| Case 77 | 4 | 119,877,794 | 119,956,411 | 3 | 0 | 3 | 1 |
| Case 77 | 4 | 119,962,741 | 144,920,596 | 2 | 0 | 2 | 1 |
| Case 77 | 4 | 144,945,108 | 144,950,193 | 4 | 0 | 4 | 1 |
| Case 77 | 4 | 144,965,891 | 145,035,868 | 4 | 1 | 5 | 0 |
| Case 77 | 4 | 145,040,841 | 153,938,095 | 2 | 0 | 2 | 1 |
| Case 77 | 4 | 153,940,203 | 154,020,068 | 3 | 0 | 3 | 1 |
| Case 77 | 4 | 154,022,065 | 185,173,993 | 2 | 0 | 2 | 1 |
| Case 77 | 4 | 185,175,421 | 185,400,748 | 3 | 0 | 3 | 1 |
| Case 77 | 4 | 185,406,285 | 187,538,224 | 2 | 0 | 2 | 1 |
| Case 77 | 4 | 187,538,239 | 187,549,809 | 3 | 0 | 3 | 1 |
| Case 77 | 4 | 187,549,883 | 190,963,766 | 2 | 0 | 2 | 1 |
| Case 77 | 5 | 38,139      | 850,518     | 2 | 0 | 2 | 1 |
| Case 77 | 5 | 850,668     | 996,696     | 3 | 0 | 3 | 1 |
| Case 77 | 5 | 999,338     | 1,089,099   | 2 | 0 | 2 | 1 |
| Case 77 | 5 | 1,090,534   | 10,236,927  | 3 | 0 | 3 | 1 |
| Case 77 | 5 | 10,239,233  | 10,450,062  | 2 | 0 | 2 | 1 |
| Case 77 | 5 | 10,450,107  | 12,394,645  | 3 | 0 | 3 | 1 |
| Case 77 | 5 | 12,401,130  | 12,698,832  | 2 | 0 | 2 | 1 |
| Case 77 | 5 | 12,710,981  | 19,488,982  | 3 | 0 | 3 | 1 |
| Case 77 | 5 | 19,490,899  | 19,871,092  | 2 | 0 | 2 | 1 |
| Case 77 | 5 | 19,872,234  | 26,885,795  | 3 | 0 | 3 | 1 |
| Case 77 | 5 | 26,885,797  | 26,961,843  | 2 | 0 | 2 | 1 |
| Case 77 | 5 | 26,965,781  | 28,292,827  | 3 | 0 | 3 | 1 |

|         |   |             |             |   |   |   |   |
|---------|---|-------------|-------------|---|---|---|---|
| Case 77 | 5 | 28,295,497  | 28,713,125  | 2 | 0 | 2 | 1 |
| Case 77 | 5 | 28,719,681  | 37,061,067  | 3 | 0 | 3 | 1 |
| Case 77 | 5 | 37,107,263  | 37,567,851  | 2 | 0 | 2 | 1 |
| Case 77 | 5 | 37,585,849  | 38,765,637  | 3 | 0 | 3 | 1 |
| Case 77 | 5 | 38,770,162  | 39,315,745  | 2 | 0 | 2 | 1 |
| Case 77 | 5 | 39,315,912  | 41,038,854  | 3 | 0 | 3 | 1 |
| Case 77 | 5 | 41,038,870  | 42,719,092  | 2 | 0 | 2 | 1 |
| Case 77 | 5 | 42,719,239  | 43,161,568  | 3 | 0 | 3 | 1 |
| Case 77 | 5 | 43,164,060  | 43,388,500  | 2 | 0 | 2 | 1 |
| Case 77 | 5 | 43,394,778  | 43,462,210  | 4 | 0 | 4 | 1 |
| Case 77 | 5 | 43,480,111  | 43,490,142  | 3 | 0 | 3 | 1 |
| Case 77 | 5 | 43,492,396  | 46,399,093  | 2 | 0 | 2 | 1 |
| Case 77 | 5 | 49,457,282  | 70,307,464  | 2 | 0 | 2 | 1 |
| Case 77 | 5 | 70,308,262  | 73,045,761  | 3 | 0 | 3 | 1 |
| Case 77 | 5 | 73,046,715  | 73,048,932  | 2 | 0 | 2 | 1 |
| Case 77 | 5 | 73,052,741  | 73,153,949  | 1 | 0 | 1 | 0 |
| Case 77 | 5 | 73,153,979  | 73,153,979  | 2 | 0 | 2 | 1 |
| Case 77 | 5 | 73,159,098  | 95,539,448  | 3 | 0 | 3 | 1 |
| Case 77 | 5 | 95,540,189  | 95,548,515  | 4 | 0 | 4 | 1 |
| Case 77 | 5 | 95,554,891  | 95,827,499  | 5 | 0 | 5 | 1 |
| Case 77 | 5 | 95,836,300  | 95,976,611  | 4 | 0 | 4 | 1 |
| Case 77 | 5 | 95,977,079  | 112,851,022 | 3 | 0 | 3 | 1 |
| Case 77 | 5 | 112,853,189 | 112,963,488 | 2 | 0 | 2 | 1 |
| Case 77 | 5 | 112,965,145 | 176,691,279 | 3 | 0 | 3 | 1 |
| Case 77 | 5 | 176,700,885 | 176,886,119 | 4 | 0 | 4 | 1 |
| Case 77 | 5 | 176,886,179 | 180,693,127 | 3 | 0 | 3 | 1 |
| Case 77 | 6 | 108,666     | 1,775,436   | 3 | 0 | 3 | 1 |
| Case 77 | 6 | 1,775,863   | 2,190,846   | 2 | 0 | 2 | 1 |
| Case 77 | 6 | 2,199,634   | 6,882,117   | 3 | 0 | 3 | 1 |
| Case 77 | 6 | 6,883,618   | 12,709,009  | 2 | 2 | 4 | 0 |
| Case 77 | 6 | 12,712,516  | 13,078,644  | 2 | 1 | 3 | 0 |
| Case 77 | 6 | 13,097,658  | 13,921,016  | 3 | 1 | 4 | 0 |
| Case 77 | 6 | 13,923,976  | 29,142,317  | 2 | 1 | 3 | 0 |
| Case 77 | 6 | 29,142,476  | 29,256,420  | 3 | 1 | 4 | 0 |
| Case 77 | 6 | 29,257,772  | 31,070,664  | 2 | 1 | 3 | 0 |
| Case 77 | 6 | 31,071,645  | 31,080,859  | 3 | 1 | 4 | 0 |
| Case 77 | 6 | 31,080,899  | 31,337,633  | 2 | 1 | 3 | 0 |
| Case 77 | 6 | 31,338,528  | 31,341,357  | 0 | 0 | 0 | 0 |
| Case 77 | 6 | 31,342,484  | 31,342,484  | 2 | 0 | 2 | 1 |
| Case 77 | 6 | 31,342,631  | 32,288,089  | 2 | 1 | 3 | 0 |
| Case 77 | 6 | 32,288,190  | 32,336,766  | 3 | 1 | 4 | 0 |
| Case 77 | 6 | 32,337,630  | 43,936,789  | 2 | 1 | 3 | 0 |
| Case 77 | 6 | 43,937,518  | 43,990,199  | 3 | 1 | 4 | 0 |
| Case 77 | 6 | 43,992,587  | 44,946,463  | 2 | 1 | 3 | 0 |
| Case 77 | 6 | 44,946,506  | 46,000,258  | 3 | 1 | 4 | 0 |
| Case 77 | 6 | 46,007,845  | 51,102,772  | 2 | 1 | 3 | 0 |
| Case 77 | 6 | 51,113,582  | 51,637,536  | 3 | 1 | 4 | 0 |
| Case 77 | 6 | 51,637,561  | 56,569,104  | 2 | 1 | 3 | 0 |
| Case 77 | 6 | 56,598,426  | 56,843,294  | 3 | 1 | 4 | 0 |
| Case 77 | 6 | 56,846,621  | 58,752,089  | 2 | 1 | 3 | 0 |
| Case 77 | 6 | 61,891,118  | 62,042,253  | 2 | 1 | 3 | 0 |
| Case 77 | 6 | 62,059,718  | 65,765,856  | 3 | 1 | 4 | 0 |
| Case 77 | 6 | 65,765,963  | 66,258,778  | 2 | 1 | 3 | 0 |
| Case 77 | 6 | 66,259,508  | 66,891,318  | 3 | 1 | 4 | 0 |
| Case 77 | 6 | 66,891,536  | 68,542,695  | 2 | 1 | 3 | 0 |
| Case 77 | 6 | 68,545,861  | 69,540,950  | 3 | 1 | 4 | 0 |
| Case 77 | 6 | 69,541,114  | 71,234,919  | 2 | 1 | 3 | 0 |
| Case 77 | 6 | 71,234,960  | 73,951,780  | 3 | 1 | 4 | 0 |
| Case 77 | 6 | 73,951,808  | 74,270,574  | 2 | 1 | 3 | 0 |
| Case 77 | 6 | 74,275,405  | 75,851,829  | 3 | 1 | 4 | 0 |
| Case 77 | 6 | 75,852,488  | 76,125,691  | 2 | 1 | 3 | 0 |



|         |   |             |             |   |   |   |   |
|---------|---|-------------|-------------|---|---|---|---|
| Case 77 | 6 | 76,127,504  | 77,266,188  | 3 | 1 | 4 | 0 |
| Case 77 | 6 | 77,268,990  | 78,125,662  | 2 | 1 | 3 | 0 |
| Case 77 | 6 | 78,127,675  | 79,856,630  | 3 | 1 | 4 | 0 |
| Case 77 | 6 | 79,859,877  | 80,383,448  | 2 | 1 | 3 | 0 |
| Case 77 | 6 | 80,389,433  | 80,715,838  | 3 | 1 | 4 | 0 |
| Case 77 | 6 | 80,717,615  | 81,341,175  | 2 | 1 | 3 | 0 |
| Case 77 | 6 | 81,342,885  | 83,679,599  | 3 | 1 | 4 | 0 |
| Case 77 | 6 | 83,698,770  | 83,911,334  | 2 | 1 | 3 | 0 |
| Case 77 | 6 | 83,915,414  | 90,333,161  | 3 | 1 | 4 | 0 |
| Case 77 | 6 | 90,333,624  | 90,463,872  | 2 | 1 | 3 | 0 |
| Case 77 | 6 | 90,463,873  | 91,682,316  | 3 | 1 | 4 | 0 |
| Case 77 | 6 | 91,683,972  | 91,683,972  | 2 | 1 | 3 | 0 |
| Case 77 | 6 | 91,695,600  | 91,725,260  | 2 | 0 | 2 | 1 |
| Case 77 | 6 | 91,728,217  | 91,751,775  | 2 | 1 | 3 | 0 |
| Case 77 | 6 | 91,752,473  | 101,598,363 | 3 | 1 | 4 | 0 |
| Case 77 | 6 | 101,599,744 | 125,011,951 | 2 | 1 | 3 | 0 |
| Case 77 | 6 | 125,016,471 | 132,598,642 | 3 | 1 | 4 | 0 |
| Case 77 | 6 | 132,603,042 | 147,816,995 | 2 | 1 | 3 | 0 |
| Case 77 | 6 | 147,819,598 | 147,958,767 | 2 | 0 | 2 | 1 |
| Case 77 | 6 | 147,968,492 | 170,980,171 | 2 | 1 | 3 | 0 |
| Case 77 | 7 | 44,935      | 10,368,887  | 2 | 1 | 3 | 0 |
| Case 77 | 7 | 10,383,334  | 16,591,748  | 2 | 0 | 2 | 1 |
| Case 77 | 7 | 16,592,915  | 16,707,747  | 3 | 0 | 3 | 1 |
| Case 77 | 7 | 16,708,028  | 17,566,664  | 2 | 0 | 2 | 1 |
| Case 77 | 7 | 17,566,678  | 17,743,719  | 3 | 0 | 3 | 1 |
| Case 77 | 7 | 17,746,628  | 20,886,887  | 2 | 0 | 2 | 1 |
| Case 77 | 7 | 20,896,062  | 21,179,706  | 3 | 0 | 3 | 1 |
| Case 77 | 7 | 21,181,503  | 21,372,342  | 2 | 0 | 2 | 1 |
| Case 77 | 7 | 21,373,772  | 21,504,427  | 3 | 0 | 3 | 1 |
| Case 77 | 7 | 21,509,745  | 22,344,911  | 2 | 0 | 2 | 1 |
| Case 77 | 7 | 22,346,329  | 22,517,858  | 3 | 0 | 3 | 1 |
| Case 77 | 7 | 22,517,994  | 25,533,563  | 2 | 0 | 2 | 1 |
| Case 77 | 7 | 25,540,744  | 25,876,612  | 3 | 0 | 3 | 1 |
| Case 77 | 7 | 25,887,278  | 26,522,004  | 2 | 0 | 2 | 1 |
| Case 77 | 7 | 26,526,960  | 26,638,405  | 3 | 0 | 3 | 1 |
| Case 77 | 7 | 26,639,622  | 28,338,080  | 2 | 0 | 2 | 1 |
| Case 77 | 7 | 28,340,850  | 29,257,612  | 3 | 0 | 3 | 1 |
| Case 77 | 7 | 29,260,018  | 29,575,822  | 2 | 0 | 2 | 1 |
| Case 77 | 7 | 29,577,572  | 29,641,278  | 3 | 0 | 3 | 1 |
| Case 77 | 7 | 29,641,468  | 30,795,146  | 2 | 0 | 2 | 1 |
| Case 77 | 7 | 30,795,273  | 30,921,965  | 3 | 0 | 3 | 1 |
| Case 77 | 7 | 30,922,569  | 34,734,251  | 2 | 0 | 2 | 1 |
| Case 77 | 7 | 34,742,051  | 35,646,526  | 3 | 0 | 3 | 1 |
| Case 77 | 7 | 35,650,563  | 37,626,839  | 2 | 0 | 2 | 1 |
| Case 77 | 7 | 37,663,495  | 38,292,663  | 2 | 1 | 3 | 0 |
| Case 77 | 7 | 38,297,145  | 38,362,957  | 3 | 1 | 4 | 0 |
| Case 77 | 7 | 38,363,748  | 58,007,774  | 2 | 1 | 3 | 0 |
| Case 77 | 7 | 58,019,061  | 58,019,061  | 2 | 0 | 2 | 1 |
| Case 77 | 7 | 61,056,053  | 62,113,011  | 2 | 0 | 2 | 1 |
| Case 77 | 7 | 62,140,786  | 62,413,547  | 1 | 0 | 1 | 0 |
| Case 77 | 7 | 62,437,581  | 62,458,262  | 2 | 0 | 2 | 1 |
| Case 77 | 7 | 62,479,327  | 89,060,931  | 2 | 1 | 3 | 0 |
| Case 77 | 7 | 89,061,690  | 89,459,030  | 3 | 1 | 4 | 0 |
| Case 77 | 7 | 89,460,928  | 100,675,367 | 2 | 1 | 3 | 0 |
| Case 77 | 7 | 100,675,376 | 100,685,691 | 2 | 0 | 2 | 1 |
| Case 77 | 7 | 100,685,709 | 159,119,486 | 2 | 1 | 3 | 0 |
| Case 77 | 8 | 164,984     | 193,756     | 2 | 0 | 2 | 1 |
| Case 77 | 8 | 195,254     | 198,770     | 1 | 0 | 1 | 0 |
| Case 77 | 8 | 198,839     | 16,337,635  | 2 | 0 | 2 | 1 |
| Case 77 | 8 | 16,339,528  | 17,179,998  | 1 | 0 | 1 | 0 |
| Case 77 | 8 | 17,181,772  | 17,542,024  | 2 | 0 | 2 | 1 |

|         |   |            |            |   |   |   |   |
|---------|---|------------|------------|---|---|---|---|
| Case 77 | 8 | 17,542,215 | 17,585,129 | 1 | 0 | 1 | 0 |
| Case 77 | 8 | 17,586,321 | 17,639,313 | 2 | 0 | 2 | 1 |
| Case 77 | 8 | 17,643,685 | 17,924,735 | 1 | 0 | 1 | 0 |
| Case 77 | 8 | 17,924,739 | 17,953,439 | 2 | 0 | 2 | 1 |
| Case 77 | 8 | 17,953,808 | 18,077,214 | 1 | 0 | 1 | 0 |
| Case 77 | 8 | 18,077,310 | 18,080,060 | 2 | 0 | 2 | 1 |
| Case 77 | 8 | 18,080,115 | 18,665,836 | 1 | 0 | 1 | 0 |
| Case 77 | 8 | 18,666,286 | 18,730,036 | 2 | 0 | 2 | 1 |
| Case 77 | 8 | 18,730,581 | 18,926,827 | 1 | 0 | 1 | 0 |
| Case 77 | 8 | 18,926,977 | 19,419,494 | 2 | 0 | 2 | 1 |
| Case 77 | 8 | 19,429,049 | 19,600,329 | 1 | 0 | 1 | 0 |
| Case 77 | 8 | 19,601,520 | 19,626,356 | 2 | 0 | 2 | 1 |
| Case 77 | 8 | 19,626,439 | 19,997,540 | 1 | 0 | 1 | 0 |
| Case 77 | 8 | 20,001,454 | 20,038,418 | 2 | 0 | 2 | 1 |
| Case 77 | 8 | 20,038,445 | 20,110,915 | 1 | 0 | 1 | 0 |
| Case 77 | 8 | 20,112,355 | 21,051,235 | 2 | 0 | 2 | 1 |
| Case 77 | 8 | 21,053,295 | 21,298,827 | 1 | 0 | 1 | 0 |
| Case 77 | 8 | 21,299,092 | 21,733,768 | 2 | 0 | 2 | 1 |
| Case 77 | 8 | 21,734,560 | 21,903,316 | 1 | 0 | 1 | 0 |
| Case 77 | 8 | 21,904,212 | 21,964,944 | 2 | 0 | 2 | 1 |
| Case 77 | 8 | 21,965,061 | 22,458,761 | 1 | 0 | 1 | 0 |
| Case 77 | 8 | 22,459,488 | 22,687,572 | 2 | 0 | 2 | 1 |
| Case 77 | 8 | 22,697,090 | 22,972,245 | 1 | 0 | 1 | 0 |
| Case 77 | 8 | 22,972,282 | 23,054,779 | 2 | 0 | 2 | 1 |
| Case 77 | 8 | 23,055,729 | 23,104,413 | 1 | 0 | 1 | 0 |
| Case 77 | 8 | 23,104,612 | 23,240,061 | 2 | 0 | 2 | 1 |
| Case 77 | 8 | 23,240,389 | 23,365,884 | 1 | 0 | 1 | 0 |
| Case 77 | 8 | 23,367,757 | 23,477,981 | 2 | 0 | 2 | 1 |
| Case 77 | 8 | 23,478,587 | 23,610,799 | 1 | 0 | 1 | 0 |
| Case 77 | 8 | 23,612,956 | 23,732,888 | 2 | 0 | 2 | 1 |
| Case 77 | 8 | 23,742,960 | 24,533,193 | 1 | 0 | 1 | 0 |
| Case 77 | 8 | 24,536,448 | 25,325,757 | 2 | 0 | 2 | 1 |
| Case 77 | 8 | 25,326,140 | 25,371,087 | 1 | 0 | 1 | 0 |
| Case 77 | 8 | 25,374,910 | 25,657,921 | 2 | 0 | 2 | 1 |
| Case 77 | 8 | 25,660,392 | 25,812,834 | 1 | 0 | 1 | 0 |
| Case 77 | 8 | 25,814,150 | 26,001,404 | 2 | 0 | 2 | 1 |
| Case 77 | 8 | 26,002,358 | 26,340,833 | 1 | 0 | 1 | 0 |
| Case 77 | 8 | 26,343,095 | 26,635,744 | 2 | 0 | 2 | 1 |
| Case 77 | 8 | 26,638,910 | 27,040,155 | 1 | 0 | 1 | 0 |
| Case 77 | 8 | 27,050,300 | 27,534,727 | 2 | 0 | 2 | 1 |
| Case 77 | 8 | 27,539,370 | 27,711,673 | 1 | 0 | 1 | 0 |
| Case 77 | 8 | 27,715,116 | 28,291,883 | 2 | 0 | 2 | 1 |
| Case 77 | 8 | 28,296,171 | 29,206,126 | 1 | 0 | 1 | 0 |
| Case 77 | 8 | 29,207,714 | 29,469,606 | 2 | 0 | 2 | 1 |
| Case 77 | 8 | 29,470,596 | 32,615,098 | 1 | 0 | 1 | 0 |
| Case 77 | 8 | 32,617,714 | 32,803,573 | 2 | 0 | 2 | 1 |
| Case 77 | 8 | 32,819,720 | 33,243,343 | 1 | 0 | 1 | 0 |
| Case 77 | 8 | 33,246,504 | 33,713,343 | 2 | 0 | 2 | 1 |
| Case 77 | 8 | 33,713,451 | 36,615,252 | 1 | 0 | 1 | 0 |
| Case 77 | 8 | 36,621,588 | 38,006,197 | 2 | 0 | 2 | 1 |
| Case 77 | 8 | 38,013,848 | 38,260,136 | 1 | 0 | 1 | 0 |
| Case 77 | 8 | 38,260,815 | 38,834,076 | 2 | 0 | 2 | 1 |
| Case 77 | 8 | 38,835,269 | 39,834,819 | 1 | 0 | 1 | 0 |
| Case 77 | 8 | 39,835,582 | 39,901,373 | 2 | 0 | 2 | 1 |
| Case 77 | 8 | 39,901,761 | 40,138,358 | 1 | 0 | 1 | 0 |
| Case 77 | 8 | 40,146,549 | 43,791,691 | 2 | 0 | 2 | 1 |
| Case 77 | 8 | 46,886,735 | 46,942,842 | 4 | 0 | 4 | 1 |
| Case 77 | 8 | 46,944,913 | 48,625,376 | 5 | 0 | 5 | 1 |
| Case 77 | 8 | 48,626,132 | 49,695,775 | 4 | 0 | 4 | 1 |
| Case 77 | 8 | 49,718,452 | 51,772,697 | 5 | 0 | 5 | 1 |
| Case 77 | 8 | 51,780,761 | 60,062,861 | 4 | 0 | 4 | 1 |

|         |   |             |             |   |   |   |   |
|---------|---|-------------|-------------|---|---|---|---|
| Case 77 | 8 | 60,063,190  | 70,976,756  | 3 | 0 | 3 | 1 |
| Case 77 | 8 | 70,979,433  | 75,494,355  | 4 | 0 | 4 | 1 |
| Case 77 | 8 | 75,513,134  | 75,584,319  | 6 | 0 | 6 | 1 |
| Case 77 | 8 | 75,599,357  | 75,614,614  | 5 | 0 | 5 | 1 |
| Case 77 | 8 | 75,616,710  | 127,718,806 | 4 | 0 | 4 | 1 |
| Case 77 | 8 | 127,719,548 | 127,866,125 | 5 | 0 | 5 | 1 |
| Case 77 | 8 | 127,868,163 | 128,482,642 | 6 | 0 | 6 | 1 |
| Case 77 | 8 | 128,483,096 | 132,074,410 | 5 | 0 | 5 | 1 |
| Case 77 | 8 | 132,074,886 | 133,029,897 | 6 | 0 | 6 | 1 |
| Case 77 | 8 | 133,031,047 | 133,194,780 | 5 | 0 | 5 | 1 |
| Case 77 | 8 | 133,202,844 | 133,402,654 | 6 | 0 | 6 | 1 |
| Case 77 | 8 | 133,404,011 | 135,752,635 | 5 | 0 | 5 | 1 |
| Case 77 | 8 | 135,755,248 | 135,907,056 | 6 | 0 | 6 | 1 |
| Case 77 | 8 | 135,908,515 | 136,817,274 | 5 | 0 | 5 | 1 |
| Case 77 | 8 | 136,822,043 | 138,769,669 | 6 | 0 | 6 | 1 |
| Case 77 | 8 | 138,771,147 | 144,919,852 | 5 | 0 | 5 | 1 |
| Case 77 | 8 | 144,919,856 | 144,943,223 | 4 | 0 | 4 | 1 |
| Case 77 | 8 | 144,943,389 | 144,990,840 | 5 | 0 | 5 | 1 |
| Case 77 | 8 | 144,990,878 | 145,159,099 | 4 | 0 | 4 | 1 |
| Case 77 | 8 | 145,160,646 | 146,293,414 | 5 | 0 | 5 | 1 |
| Case 77 | 9 | 46,587      | 33,167,141  | 2 | 2 | 4 | 0 |
| Case 77 | 9 | 33,173,556  | 33,318,937  | 3 | 1 | 4 | 0 |
| Case 77 | 9 | 33,318,975  | 33,328,812  | 2 | 2 | 4 | 0 |
| Case 77 | 9 | 33,343,397  | 33,351,709  | 2 | 1 | 3 | 0 |
| Case 77 | 9 | 33,351,730  | 33,700,901  | 2 | 2 | 4 | 0 |
| Case 77 | 9 | 33,702,339  | 34,107,504  | 2 | 1 | 3 | 0 |
| Case 77 | 9 | 34,107,505  | 34,572,767  | 2 | 2 | 4 | 0 |
| Case 77 | 9 | 34,572,815  | 34,759,890  | 2 | 1 | 3 | 0 |
| Case 77 | 9 | 34,768,441  | 35,735,145  | 2 | 2 | 4 | 0 |
| Case 77 | 9 | 35,735,173  | 35,918,778  | 2 | 1 | 3 | 0 |
| Case 77 | 9 | 35,920,856  | 39,004,140  | 2 | 2 | 4 | 0 |
| Case 77 | 9 | 39,076,028  | 46,944,322  | 2 | 1 | 3 | 0 |
| Case 77 | 9 | 65,629,772  | 71,138,802  | 2 | 1 | 3 | 0 |
| Case 77 | 9 | 71,144,546  | 71,156,380  | 3 | 0 | 3 | 1 |
| Case 77 | 9 | 71,163,720  | 72,519,172  | 4 | 0 | 4 | 1 |
| Case 77 | 9 | 72,520,270  | 73,101,159  | 3 | 0 | 3 | 1 |
| Case 77 | 9 | 73,102,824  | 74,279,487  | 4 | 0 | 4 | 1 |
| Case 77 | 9 | 74,281,371  | 74,600,517  | 3 | 0 | 3 | 1 |
| Case 77 | 9 | 74,602,933  | 74,952,524  | 4 | 0 | 4 | 1 |
| Case 77 | 9 | 74,956,781  | 75,538,302  | 3 | 0 | 3 | 1 |
| Case 77 | 9 | 75,538,725  | 76,935,726  | 4 | 0 | 4 | 1 |
| Case 77 | 9 | 76,936,998  | 80,046,326  | 3 | 0 | 3 | 1 |
| Case 77 | 9 | 80,046,340  | 81,497,316  | 4 | 0 | 4 | 1 |
| Case 77 | 9 | 81,497,488  | 84,686,091  | 3 | 0 | 3 | 1 |
| Case 77 | 9 | 84,697,395  | 86,185,455  | 4 | 0 | 4 | 1 |
| Case 77 | 9 | 86,191,111  | 86,696,749  | 3 | 0 | 3 | 1 |
| Case 77 | 9 | 86,700,593  | 86,886,897  | 4 | 0 | 4 | 1 |
| Case 77 | 9 | 86,888,818  | 87,769,748  | 3 | 0 | 3 | 1 |
| Case 77 | 9 | 87,771,842  | 87,834,342  | 4 | 0 | 4 | 1 |
| Case 77 | 9 | 87,835,091  | 89,874,932  | 3 | 0 | 3 | 1 |
| Case 77 | 9 | 89,878,104  | 90,065,940  | 4 | 0 | 4 | 1 |
| Case 77 | 9 | 90,066,956  | 91,262,296  | 3 | 0 | 3 | 1 |
| Case 77 | 9 | 91,262,347  | 94,985,703  | 4 | 0 | 4 | 1 |
| Case 77 | 9 | 94,985,708  | 95,263,179  | 3 | 0 | 3 | 1 |
| Case 77 | 9 | 95,263,216  | 99,012,277  | 4 | 0 | 4 | 1 |
| Case 77 | 9 | 99,015,141  | 103,299,435 | 3 | 0 | 3 | 1 |
| Case 77 | 9 | 103,312,290 | 104,164,162 | 4 | 0 | 4 | 1 |
| Case 77 | 9 | 104,165,360 | 104,355,455 | 3 | 0 | 3 | 1 |
| Case 77 | 9 | 104,356,439 | 105,496,890 | 4 | 0 | 4 | 1 |
| Case 77 | 9 | 105,502,498 | 105,893,479 | 3 | 0 | 3 | 1 |
| Case 77 | 9 | 105,900,043 | 107,652,459 | 4 | 0 | 4 | 1 |

|         |    |             |             |   |   |   |   |
|---------|----|-------------|-------------|---|---|---|---|
| Case 77 | 9  | 107,653,426 | 108,425,069 | 3 | 0 | 3 | 1 |
| Case 77 | 9  | 108,425,081 | 109,031,079 | 4 | 0 | 4 | 1 |
| Case 77 | 9  | 109,043,885 | 110,438,418 | 3 | 0 | 3 | 1 |
| Case 77 | 9  | 110,438,441 | 111,151,700 | 4 | 0 | 4 | 1 |
| Case 77 | 9  | 111,152,200 | 111,396,742 | 3 | 0 | 3 | 1 |
| Case 77 | 9  | 111,397,766 | 111,617,824 | 4 | 0 | 4 | 1 |
| Case 77 | 9  | 111,617,827 | 112,070,162 | 3 | 0 | 3 | 1 |
| Case 77 | 9  | 112,072,419 | 112,705,383 | 4 | 0 | 4 | 1 |
| Case 77 | 9  | 112,705,680 | 113,282,064 | 3 | 0 | 3 | 1 |
| Case 77 | 9  | 113,283,373 | 114,069,273 | 4 | 0 | 4 | 1 |
| Case 77 | 9  | 114,078,716 | 116,359,178 | 3 | 0 | 3 | 1 |
| Case 77 | 9  | 116,362,738 | 116,749,297 | 4 | 0 | 4 | 1 |
| Case 77 | 9  | 116,750,780 | 117,393,736 | 3 | 0 | 3 | 1 |
| Case 77 | 9  | 117,393,934 | 117,502,242 | 4 | 0 | 4 | 1 |
| Case 77 | 9  | 117,504,798 | 118,057,870 | 3 | 0 | 3 | 1 |
| Case 77 | 9  | 118,063,164 | 118,642,639 | 4 | 0 | 4 | 1 |
| Case 77 | 9  | 118,644,810 | 120,099,585 | 3 | 0 | 3 | 1 |
| Case 77 | 9  | 120,102,138 | 121,911,162 | 4 | 0 | 4 | 1 |
| Case 77 | 9  | 121,914,488 | 123,292,378 | 3 | 0 | 3 | 1 |
| Case 77 | 9  | 123,296,964 | 123,636,311 | 4 | 0 | 4 | 1 |
| Case 77 | 9  | 123,637,006 | 124,931,981 | 3 | 0 | 3 | 1 |
| Case 77 | 9  | 124,931,984 | 125,007,584 | 4 | 0 | 4 | 1 |
| Case 77 | 9  | 125,024,291 | 128,094,232 | 3 | 0 | 3 | 1 |
| Case 77 | 9  | 128,097,490 | 132,597,021 | 2 | 0 | 2 | 1 |
| Case 77 | 9  | 132,601,229 | 133,588,943 | 3 | 0 | 3 | 1 |
| Case 77 | 9  | 133,593,939 | 133,911,687 | 4 | 0 | 4 | 1 |
| Case 77 | 9  | 133,911,706 | 134,141,129 | 3 | 0 | 3 | 1 |
| Case 77 | 9  | 134,142,444 | 134,212,002 | 4 | 0 | 4 | 1 |
| Case 77 | 9  | 134,214,383 | 134,401,335 | 3 | 0 | 3 | 1 |
| Case 77 | 9  | 134,402,338 | 135,273,601 | 4 | 0 | 4 | 1 |
| Case 77 | 9  | 135,273,692 | 135,296,341 | 3 | 0 | 3 | 1 |
| Case 77 | 9  | 135,297,764 | 135,373,497 | 4 | 0 | 4 | 1 |
| Case 77 | 9  | 135,374,091 | 135,845,035 | 3 | 0 | 3 | 1 |
| Case 77 | 9  | 135,849,248 | 135,983,592 | 4 | 0 | 4 | 1 |
| Case 77 | 9  | 135,984,173 | 136,042,694 | 3 | 0 | 3 | 1 |
| Case 77 | 9  | 136,043,270 | 136,179,704 | 4 | 0 | 4 | 1 |
| Case 77 | 9  | 136,184,526 | 137,864,163 | 3 | 0 | 3 | 1 |
| Case 77 | 9  | 137,873,099 | 138,376,372 | 4 | 0 | 4 | 1 |
| Case 77 | 9  | 138,376,390 | 139,456,212 | 3 | 0 | 3 | 1 |
| Case 77 | 9  | 139,457,506 | 139,840,215 | 4 | 0 | 4 | 1 |
| Case 77 | 9  | 139,840,216 | 139,901,681 | 5 | 0 | 5 | 1 |
| Case 77 | 9  | 139,901,891 | 140,274,255 | 4 | 0 | 4 | 1 |
| Case 77 | 9  | 140,277,524 | 140,329,373 | 5 | 0 | 5 | 1 |
| Case 77 | 9  | 140,329,482 | 141,066,491 | 4 | 0 | 4 | 1 |
| Case 77 | 10 | 98,087      | 5,075,366   | 2 | 2 | 4 | 0 |
| Case 77 | 10 | 5,075,493   | 7,470,868   | 2 | 1 | 3 | 0 |
| Case 77 | 10 | 7,471,543   | 7,732,323   | 2 | 2 | 4 | 0 |
| Case 77 | 10 | 7,739,555   | 8,006,631   | 2 | 1 | 3 | 0 |
| Case 77 | 10 | 8,006,798   | 12,595,543  | 2 | 2 | 4 | 0 |
| Case 77 | 10 | 12,595,815  | 12,869,000  | 2 | 1 | 3 | 0 |
| Case 77 | 10 | 12,869,047  | 24,206,076  | 2 | 2 | 4 | 0 |
| Case 77 | 10 | 24,207,529  | 37,451,705  | 2 | 1 | 3 | 0 |
| Case 77 | 10 | 37,454,079  | 38,407,131  | 2 | 2 | 4 | 0 |
| Case 77 | 10 | 38,407,224  | 39,097,912  | 2 | 1 | 3 | 0 |
| Case 77 | 10 | 42,436,301  | 43,659,382  | 2 | 1 | 3 | 0 |
| Case 77 | 10 | 43,659,536  | 45,776,015  | 2 | 2 | 4 | 0 |
| Case 77 | 10 | 45,779,319  | 47,703,869  | 2 | 1 | 3 | 0 |
| Case 77 | 10 | 48,047,289  | 53,156,299  | 2 | 2 | 4 | 0 |
| Case 77 | 10 | 53,158,343  | 53,365,163  | 2 | 1 | 3 | 0 |
| Case 77 | 10 | 53,365,208  | 55,560,710  | 2 | 2 | 4 | 0 |
| Case 77 | 10 | 55,562,036  | 55,720,024  | 2 | 1 | 3 | 0 |

|         |    |            |             |   |   |   |   |
|---------|----|------------|-------------|---|---|---|---|
| Case 77 | 10 | 55,721,531 | 60,954,419  | 2 | 2 | 4 | 0 |
| Case 77 | 10 | 60,961,915 | 62,773,645  | 5 | 1 | 6 | 0 |
| Case 77 | 10 | 62,780,127 | 63,633,467  | 4 | 2 | 6 | 0 |
| Case 77 | 10 | 63,636,254 | 64,968,251  | 4 | 0 | 4 | 1 |
| Case 77 | 10 | 64,968,272 | 65,281,331  | 3 | 0 | 3 | 1 |
| Case 77 | 10 | 65,285,485 | 67,488,312  | 4 | 0 | 4 | 1 |
| Case 77 | 10 | 67,495,478 | 67,894,481  | 7 | 0 | 7 | 1 |
| Case 77 | 10 | 67,898,109 | 67,898,109  | 4 | 1 | 5 | 0 |
| Case 77 | 10 | 67,899,266 | 67,899,266  | 2 | 0 | 2 | 1 |
| Case 77 | 10 | 67,902,438 | 67,902,438  | 4 | 0 | 4 | 1 |
| Case 77 | 10 | 67,914,345 | 71,142,183  | 5 | 0 | 5 | 1 |
| Case 77 | 10 | 71,142,410 | 71,245,617  | 4 | 0 | 4 | 1 |
| Case 77 | 10 | 71,246,432 | 73,020,768  | 5 | 0 | 5 | 1 |
| Case 77 | 10 | 73,021,816 | 73,270,982  | 4 | 0 | 4 | 1 |
| Case 77 | 10 | 73,280,314 | 73,351,149  | 5 | 0 | 5 | 1 |
| Case 77 | 10 | 73,351,781 | 73,453,990  | 4 | 0 | 4 | 1 |
| Case 77 | 10 | 73,454,637 | 75,415,677  | 5 | 0 | 5 | 1 |
| Case 77 | 10 | 75,416,789 | 75,567,603  | 4 | 0 | 4 | 1 |
| Case 77 | 10 | 75,567,948 | 75,937,554  | 5 | 0 | 5 | 1 |
| Case 77 | 10 | 75,940,906 | 76,617,479  | 6 | 0 | 6 | 1 |
| Case 77 | 10 | 76,617,857 | 78,205,649  | 5 | 0 | 5 | 1 |
| Case 77 | 10 | 78,206,830 | 78,630,497  | 6 | 0 | 6 | 1 |
| Case 77 | 10 | 78,630,781 | 82,764,044  | 5 | 0 | 5 | 1 |
| Case 77 | 10 | 82,768,023 | 82,984,432  | 6 | 0 | 6 | 1 |
| Case 77 | 10 | 82,986,532 | 84,315,759  | 5 | 0 | 5 | 1 |
| Case 77 | 10 | 84,322,815 | 85,073,628  | 6 | 0 | 6 | 1 |
| Case 77 | 10 | 85,074,214 | 85,074,636  | 5 | 0 | 5 | 1 |
| Case 77 | 10 | 85,085,640 | 85,599,366  | 1 | 0 | 1 | 0 |
| Case 77 | 10 | 85,600,181 | 85,741,338  | 2 | 0 | 2 | 1 |
| Case 77 | 10 | 85,741,728 | 85,936,160  | 1 | 0 | 1 | 0 |
| Case 77 | 10 | 85,936,245 | 86,016,166  | 2 | 0 | 2 | 1 |
| Case 77 | 10 | 86,016,490 | 86,337,629  | 1 | 0 | 1 | 0 |
| Case 77 | 10 | 86,342,022 | 86,466,489  | 2 | 0 | 2 | 1 |
| Case 77 | 10 | 86,467,133 | 86,649,647  | 1 | 0 | 1 | 0 |
| Case 77 | 10 | 86,650,206 | 86,755,397  | 2 | 0 | 2 | 1 |
| Case 77 | 10 | 86,758,509 | 87,484,156  | 1 | 0 | 1 | 0 |
| Case 77 | 10 | 87,484,382 | 87,909,947  | 2 | 0 | 2 | 1 |
| Case 77 | 10 | 87,911,573 | 88,414,554  | 1 | 0 | 1 | 0 |
| Case 77 | 10 | 88,414,569 | 88,493,527  | 2 | 0 | 2 | 1 |
| Case 77 | 10 | 88,496,391 | 88,703,732  | 1 | 0 | 1 | 0 |
| Case 77 | 10 | 88,704,968 | 88,768,892  | 2 | 0 | 2 | 1 |
| Case 77 | 10 | 88,786,593 | 89,782,386  | 1 | 0 | 1 | 0 |
| Case 77 | 10 | 89,784,717 | 89,958,603  | 2 | 0 | 2 | 1 |
| Case 77 | 10 | 89,961,657 | 91,059,127  | 1 | 0 | 1 | 0 |
| Case 77 | 10 | 91,059,159 | 91,181,853  | 2 | 0 | 2 | 1 |
| Case 77 | 10 | 91,185,696 | 97,260,248  | 2 | 1 | 3 | 0 |
| Case 77 | 10 | 97,266,538 | 97,487,362  | 2 | 2 | 4 | 0 |
| Case 77 | 10 | 97,496,989 | 135,477,883 | 2 | 1 | 3 | 0 |
| Case 77 | 11 | 193,146    | 5,474,894   | 2 | 0 | 2 | 1 |
| Case 77 | 11 | 5,474,965  | 5,655,036   | 3 | 0 | 3 | 1 |
| Case 77 | 11 | 5,655,233  | 11,260,163  | 2 | 0 | 2 | 1 |
| Case 77 | 11 | 11,261,045 | 11,658,269  | 3 | 0 | 3 | 1 |
| Case 77 | 11 | 11,660,815 | 12,247,851  | 2 | 0 | 2 | 1 |
| Case 77 | 11 | 12,248,515 | 12,345,459  | 3 | 0 | 3 | 1 |
| Case 77 | 11 | 12,345,596 | 15,893,286  | 2 | 0 | 2 | 1 |
| Case 77 | 11 | 15,903,372 | 16,057,990  | 3 | 0 | 3 | 1 |
| Case 77 | 11 | 16,062,814 | 16,785,618  | 2 | 0 | 2 | 1 |
| Case 77 | 11 | 16,787,777 | 16,896,925  | 3 | 0 | 3 | 1 |
| Case 77 | 11 | 16,897,496 | 18,726,022  | 2 | 0 | 2 | 1 |
| Case 77 | 11 | 18,727,448 | 18,742,570  | 3 | 0 | 3 | 1 |
| Case 77 | 11 | 18,743,511 | 18,939,666  | 2 | 0 | 2 | 1 |

|         |    |             |             |   |   |   |   |
|---------|----|-------------|-------------|---|---|---|---|
| Case 77 | 11 | 18,949,220  | 18,955,550  | 2 | 2 | 4 | 0 |
| Case 77 | 11 | 18,956,690  | 19,769,712  | 2 | 0 | 2 | 1 |
| Case 77 | 11 | 19,770,390  | 20,070,668  | 3 | 0 | 3 | 1 |
| Case 77 | 11 | 20,071,386  | 26,070,407  | 2 | 0 | 2 | 1 |
| Case 77 | 11 | 26,079,373  | 28,549,266  | 2 | 1 | 3 | 0 |
| Case 77 | 11 | 28,575,986  | 30,613,825  | 2 | 2 | 4 | 0 |
| Case 77 | 11 | 30,618,816  | 30,661,857  | 6 | 1 | 7 | 0 |
| Case 77 | 11 | 30,687,010  | 31,048,097  | 4 | 1 | 5 | 0 |
| Case 77 | 11 | 31,056,014  | 39,442,174  | 7 | 0 | 7 | 1 |
| Case 77 | 11 | 39,445,016  | 40,074,432  | 6 | 1 | 7 | 0 |
| Case 77 | 11 | 40,075,587  | 40,079,008  | 4 | 1 | 5 | 0 |
| Case 77 | 11 | 40,080,055  | 40,080,055  | 2 | 0 | 2 | 1 |
| Case 77 | 11 | 40,082,660  | 40,082,660  | 2 | 2 | 4 | 0 |
| Case 77 | 11 | 40,082,790  | 41,154,796  | 5 | 1 | 6 | 0 |
| Case 77 | 11 | 41,158,377  | 41,158,377  | 2 | 2 | 4 | 0 |
| Case 77 | 11 | 41,159,081  | 42,266,666  | 6 | 1 | 7 | 0 |
| Case 77 | 11 | 42,278,390  | 43,737,430  | 4 | 1 | 5 | 0 |
| Case 77 | 11 | 43,740,422  | 43,740,422  | 7 | 0 | 7 | 1 |
| Case 77 | 11 | 43,748,673  | 44,370,034  | 6 | 1 | 7 | 0 |
| Case 77 | 11 | 44,371,538  | 45,403,436  | 7 | 0 | 7 | 1 |
| Case 77 | 11 | 45,404,318  | 45,408,742  | 4 | 1 | 5 | 0 |
| Case 77 | 11 | 45,414,183  | 45,414,183  | 2 | 0 | 2 | 1 |
| Case 77 | 11 | 45,415,061  | 45,417,089  | 2 | 2 | 4 | 0 |
| Case 77 | 11 | 45,419,113  | 45,944,542  | 5 | 1 | 6 | 0 |
| Case 77 | 11 | 45,945,063  | 46,817,323  | 4 | 2 | 6 | 0 |
| Case 77 | 11 | 46,823,681  | 47,720,228  | 4 | 0 | 4 | 1 |
| Case 77 | 11 | 47,721,049  | 48,234,357  | 4 | 1 | 5 | 0 |
| Case 77 | 11 | 48,238,455  | 48,238,455  | 2 | 0 | 2 | 1 |
| Case 77 | 11 | 48,238,468  | 48,373,849  | 2 | 2 | 4 | 0 |
| Case 77 | 11 | 48,375,604  | 49,325,425  | 5 | 1 | 6 | 0 |
| Case 77 | 11 | 49,357,043  | 50,008,258  | 2 | 2 | 4 | 0 |
| Case 77 | 11 | 50,057,854  | 50,345,592  | 4 | 2 | 6 | 0 |
| Case 77 | 11 | 50,349,310  | 50,630,255  | 7 | 0 | 7 | 1 |
| Case 77 | 11 | 50,668,400  | 50,697,498  | 4 | 1 | 5 | 0 |
| Case 77 | 11 | 51,095,992  | 51,440,610  | 2 | 0 | 2 | 1 |
| Case 77 | 11 | 51,446,535  | 51,478,072  | 4 | 0 | 4 | 1 |
| Case 77 | 11 | 51,479,648  | 51,591,253  | 4 | 1 | 5 | 0 |
| Case 77 | 11 | 54,794,237  | 54,794,237  | 4 | 1 | 5 | 0 |
| Case 77 | 11 | 54,801,549  | 55,303,410  | 2 | 0 | 2 | 1 |
| Case 77 | 11 | 55,303,865  | 55,362,955  | 2 | 1 | 3 | 0 |
| Case 77 | 11 | 55,370,325  | 55,415,016  | 0 | 0 | 0 | 0 |
| Case 77 | 11 | 55,424,207  | 55,432,668  | 2 | 0 | 2 | 1 |
| Case 77 | 11 | 55,432,740  | 55,659,089  | 2 | 1 | 3 | 0 |
| Case 77 | 11 | 55,667,715  | 56,185,129  | 2 | 0 | 2 | 1 |
| Case 77 | 11 | 56,185,153  | 56,237,655  | 3 | 0 | 3 | 1 |
| Case 77 | 11 | 56,237,722  | 75,292,601  | 2 | 0 | 2 | 1 |
| Case 77 | 11 | 75,294,923  | 75,431,214  | 3 | 0 | 3 | 1 |
| Case 77 | 11 | 75,431,215  | 76,852,952  | 2 | 0 | 2 | 1 |
| Case 77 | 11 | 76,853,775  | 76,925,013  | 3 | 0 | 3 | 1 |
| Case 77 | 11 | 76,925,733  | 86,140,441  | 2 | 0 | 2 | 1 |
| Case 77 | 11 | 86,145,296  | 86,610,223  | 3 | 0 | 3 | 1 |
| Case 77 | 11 | 86,612,582  | 92,260,106  | 2 | 0 | 2 | 1 |
| Case 77 | 11 | 92,267,129  | 92,714,759  | 3 | 0 | 3 | 1 |
| Case 77 | 11 | 92,714,778  | 113,974,100 | 2 | 0 | 2 | 1 |
| Case 77 | 11 | 113,975,347 | 114,092,875 | 3 | 0 | 3 | 1 |
| Case 77 | 11 | 114,093,940 | 120,085,469 | 2 | 0 | 2 | 1 |
| Case 77 | 11 | 120,089,886 | 120,190,997 | 3 | 0 | 3 | 1 |
| Case 77 | 11 | 120,193,477 | 125,850,139 | 2 | 0 | 2 | 1 |
| Case 77 | 11 | 125,850,962 | 127,178,763 | 2 | 1 | 3 | 0 |
| Case 77 | 11 | 127,183,248 | 127,664,305 | 2 | 0 | 2 | 1 |
| Case 77 | 11 | 127,664,841 | 128,049,402 | 3 | 0 | 3 | 1 |

|         |    |             |             |   |   |   |   |
|---------|----|-------------|-------------|---|---|---|---|
| Case 77 | 11 | 128,054,642 | 128,664,265 | 2 | 0 | 2 | 1 |
| Case 77 | 11 | 128,666,105 | 128,844,513 | 3 | 0 | 3 | 1 |
| Case 77 | 11 | 128,846,528 | 134,934,063 | 2 | 0 | 2 | 1 |
| Case 77 | 12 | 191,619     | 303,320     | 2 | 1 | 3 | 0 |
| Case 77 | 12 | 305,949     | 803,488     | 2 | 2 | 4 | 0 |
| Case 77 | 12 | 805,451     | 1,207,223   | 2 | 1 | 3 | 0 |
| Case 77 | 12 | 1,208,723   | 2,601,679   | 2 | 2 | 4 | 0 |
| Case 77 | 12 | 2,601,742   | 3,081,620   | 2 | 1 | 3 | 0 |
| Case 77 | 12 | 3,083,670   | 4,139,900   | 2 | 2 | 4 | 0 |
| Case 77 | 12 | 4,141,091   | 4,938,317   | 2 | 0 | 2 | 1 |
| Case 77 | 12 | 4,938,605   | 4,991,285   | 3 | 0 | 3 | 1 |
| Case 77 | 12 | 4,992,192   | 5,687,598   | 2 | 0 | 2 | 1 |
| Case 77 | 12 | 5,687,610   | 5,941,617   | 3 | 0 | 3 | 1 |
| Case 77 | 12 | 5,945,733   | 11,770,270  | 2 | 0 | 2 | 1 |
| Case 77 | 12 | 11,776,232  | 12,248,280  | 3 | 0 | 3 | 1 |
| Case 77 | 12 | 12,249,224  | 12,940,506  | 2 | 0 | 2 | 1 |
| Case 77 | 12 | 12,940,830  | 13,215,880  | 3 | 0 | 3 | 1 |
| Case 77 | 12 | 13,216,071  | 13,643,708  | 2 | 0 | 2 | 1 |
| Case 77 | 12 | 13,644,060  | 14,072,223  | 3 | 0 | 3 | 1 |
| Case 77 | 12 | 14,073,557  | 21,064,348  | 2 | 0 | 2 | 1 |
| Case 77 | 12 | 21,068,337  | 30,404,634  | 2 | 2 | 4 | 0 |
| Case 77 | 12 | 30,407,028  | 33,146,869  | 2 | 1 | 3 | 0 |
| Case 77 | 12 | 33,148,078  | 33,506,981  | 2 | 2 | 4 | 0 |
| Case 77 | 12 | 33,510,083  | 34,853,011  | 2 | 1 | 3 | 0 |
| Case 77 | 12 | 37,876,400  | 39,028,853  | 2 | 1 | 3 | 0 |
| Case 77 | 12 | 39,042,412  | 43,517,624  | 2 | 2 | 4 | 0 |
| Case 77 | 12 | 43,521,414  | 46,578,702  | 2 | 0 | 2 | 1 |
| Case 77 | 12 | 46,579,388  | 46,767,175  | 3 | 0 | 3 | 1 |
| Case 77 | 12 | 46,778,881  | 48,232,747  | 2 | 0 | 2 | 1 |
| Case 77 | 12 | 48,234,917  | 48,417,308  | 3 | 0 | 3 | 1 |
| Case 77 | 12 | 48,417,562  | 52,913,517  | 2 | 0 | 2 | 1 |
| Case 77 | 12 | 52,913,668  | 52,963,169  | 3 | 0 | 3 | 1 |
| Case 77 | 12 | 52,963,643  | 55,732,963  | 2 | 0 | 2 | 1 |
| Case 77 | 12 | 55,737,318  | 59,509,780  | 2 | 1 | 3 | 0 |
| Case 77 | 12 | 59,512,511  | 61,426,071  | 2 | 2 | 4 | 0 |
| Case 77 | 12 | 61,434,007  | 61,905,997  | 2 | 1 | 3 | 0 |
| Case 77 | 12 | 61,906,480  | 67,212,787  | 2 | 2 | 4 | 0 |
| Case 77 | 12 | 67,213,725  | 67,439,199  | 3 | 0 | 3 | 1 |
| Case 77 | 12 | 67,440,088  | 68,047,049  | 2 | 0 | 2 | 1 |
| Case 77 | 12 | 68,049,075  | 68,420,943  | 3 | 0 | 3 | 1 |
| Case 77 | 12 | 68,421,622  | 72,338,074  | 2 | 0 | 2 | 1 |
| Case 77 | 12 | 72,338,466  | 72,620,122  | 3 | 0 | 3 | 1 |
| Case 77 | 12 | 72,622,180  | 76,021,824  | 2 | 0 | 2 | 1 |
| Case 77 | 12 | 76,022,150  | 76,302,004  | 3 | 0 | 3 | 1 |
| Case 77 | 12 | 76,303,759  | 85,981,647  | 2 | 0 | 2 | 1 |
| Case 77 | 12 | 85,995,733  | 86,169,662  | 2 | 2 | 4 | 0 |
| Case 77 | 12 | 86,172,522  | 94,483,555  | 2 | 1 | 3 | 0 |
| Case 77 | 12 | 94,483,936  | 94,491,385  | 3 | 1 | 4 | 0 |
| Case 77 | 12 | 94,499,677  | 97,175,658  | 2 | 1 | 3 | 0 |
| Case 77 | 12 | 97,186,242  | 97,225,035  | 2 | 0 | 2 | 1 |
| Case 77 | 12 | 97,226,589  | 97,518,592  | 1 | 0 | 1 | 0 |
| Case 77 | 12 | 97,520,509  | 97,550,213  | 2 | 0 | 2 | 1 |
| Case 77 | 12 | 97,551,024  | 101,885,617 | 2 | 1 | 3 | 0 |
| Case 77 | 12 | 101,885,699 | 102,108,345 | 2 | 2 | 4 | 0 |
| Case 77 | 12 | 102,110,335 | 133,810,935 | 2 | 1 | 3 | 0 |
| Case 77 | 13 | 19,058,717  | 20,830,555  | 2 | 1 | 3 | 0 |
| Case 77 | 13 | 20,830,595  | 21,159,200  | 2 | 2 | 4 | 0 |
| Case 77 | 13 | 21,159,558  | 22,275,583  | 2 | 1 | 3 | 0 |
| Case 77 | 13 | 22,275,946  | 22,801,475  | 2 | 2 | 4 | 0 |
| Case 77 | 13 | 22,803,494  | 23,279,834  | 2 | 1 | 3 | 0 |
| Case 77 | 13 | 23,281,777  | 37,095,762  | 2 | 2 | 4 | 0 |

|         |    |             |             |   |   |   |   |
|---------|----|-------------|-------------|---|---|---|---|
| Case 77 | 13 | 37,098,415  | 48,987,032  | 2 | 1 | 3 | 0 |
| Case 77 | 13 | 48,992,810  | 53,536,175  | 2 | 0 | 2 | 1 |
| Case 77 | 13 | 53,537,171  | 53,555,256  | 4 | 0 | 4 | 1 |
| Case 77 | 13 | 53,555,952  | 53,677,679  | 5 | 0 | 5 | 1 |
| Case 77 | 13 | 53,684,255  | 53,718,221  | 4 | 0 | 4 | 1 |
| Case 77 | 13 | 53,729,815  | 58,209,108  | 3 | 0 | 3 | 1 |
| Case 77 | 13 | 58,215,142  | 58,675,299  | 3 | 1 | 4 | 0 |
| Case 77 | 13 | 58,688,382  | 62,980,593  | 3 | 0 | 3 | 1 |
| Case 77 | 13 | 62,985,473  | 115,103,529 | 3 | 1 | 4 | 0 |
| Case 77 | 14 | 19,280,733  | 20,420,338  | 2 | 0 | 2 | 1 |
| Case 77 | 14 | 20,425,051  | 22,434,423  | 3 | 0 | 3 | 1 |
| Case 77 | 14 | 22,435,602  | 22,964,782  | 4 | 0 | 4 | 1 |
| Case 77 | 14 | 22,966,662  | 39,709,769  | 3 | 0 | 3 | 1 |
| Case 77 | 14 | 39,716,201  | 39,796,221  | 2 | 0 | 2 | 1 |
| Case 77 | 14 | 39,802,186  | 48,395,998  | 3 | 0 | 3 | 1 |
| Case 77 | 14 | 48,397,066  | 48,400,975  | 4 | 0 | 4 | 1 |
| Case 77 | 14 | 48,413,039  | 48,564,424  | 7 | 0 | 7 | 1 |
| Case 77 | 14 | 48,564,956  | 48,572,632  | 4 | 1 | 5 | 0 |
| Case 77 | 14 | 48,576,123  | 48,576,123  | 2 | 0 | 2 | 1 |
| Case 77 | 14 | 48,577,206  | 58,669,637  | 3 | 0 | 3 | 1 |
| Case 77 | 14 | 58,673,586  | 59,006,831  | 2 | 0 | 2 | 1 |
| Case 77 | 14 | 59,013,971  | 64,467,358  | 3 | 0 | 3 | 1 |
| Case 77 | 14 | 64,468,654  | 64,519,654  | 2 | 0 | 2 | 1 |
| Case 77 | 14 | 64,519,709  | 68,819,234  | 3 | 0 | 3 | 1 |
| Case 77 | 14 | 68,835,038  | 68,926,468  | 4 | 0 | 4 | 1 |
| Case 77 | 14 | 68,934,690  | 73,739,592  | 3 | 0 | 3 | 1 |
| Case 77 | 14 | 73,741,186  | 74,086,941  | 2 | 0 | 2 | 1 |
| Case 77 | 14 | 74,094,475  | 74,410,405  | 3 | 0 | 3 | 1 |
| Case 77 | 14 | 74,411,125  | 74,541,484  | 2 | 0 | 2 | 1 |
| Case 77 | 14 | 74,548,514  | 77,948,937  | 3 | 0 | 3 | 1 |
| Case 77 | 14 | 77,948,944  | 78,107,279  | 2 | 0 | 2 | 1 |
| Case 77 | 14 | 78,108,003  | 83,756,424  | 3 | 0 | 3 | 1 |
| Case 77 | 14 | 83,757,483  | 84,174,088  | 2 | 0 | 2 | 1 |
| Case 77 | 14 | 84,175,805  | 84,987,635  | 3 | 0 | 3 | 1 |
| Case 77 | 14 | 84,989,873  | 85,377,877  | 2 | 0 | 2 | 1 |
| Case 77 | 14 | 85,379,527  | 92,436,180  | 3 | 0 | 3 | 1 |
| Case 77 | 14 | 92,438,421  | 92,583,579  | 2 | 0 | 2 | 1 |
| Case 77 | 14 | 92,583,867  | 93,263,982  | 3 | 0 | 3 | 1 |
| Case 77 | 14 | 93,264,059  | 93,329,692  | 2 | 0 | 2 | 1 |
| Case 77 | 14 | 93,331,734  | 93,650,165  | 3 | 0 | 3 | 1 |
| Case 77 | 14 | 93,650,172  | 94,084,548  | 2 | 0 | 2 | 1 |
| Case 77 | 14 | 94,084,641  | 96,727,874  | 3 | 0 | 3 | 1 |
| Case 77 | 14 | 96,728,002  | 96,829,290  | 2 | 0 | 2 | 1 |
| Case 77 | 14 | 96,836,973  | 102,717,231 | 3 | 0 | 3 | 1 |
| Case 77 | 14 | 102,717,236 | 103,222,398 | 2 | 0 | 2 | 1 |
| Case 77 | 14 | 103,228,417 | 103,784,918 | 3 | 0 | 3 | 1 |
| Case 77 | 14 | 103,787,864 | 105,065,970 | 2 | 0 | 2 | 1 |
| Case 77 | 14 | 105,068,127 | 105,246,462 | 3 | 0 | 3 | 1 |
| Case 77 | 14 | 105,246,686 | 105,989,599 | 2 | 0 | 2 | 1 |
| Case 77 | 14 | 105,992,183 | 107,287,663 | 3 | 0 | 3 | 1 |
| Case 77 | 15 | 20,034,919  | 35,516,110  | 2 | 0 | 2 | 1 |
| Case 77 | 15 | 35,537,031  | 35,746,966  | 1 | 0 | 1 | 0 |
| Case 77 | 15 | 35,751,871  | 38,072,896  | 2 | 0 | 2 | 1 |
| Case 77 | 15 | 38,074,118  | 38,533,568  | 3 | 0 | 3 | 1 |
| Case 77 | 15 | 38,535,591  | 38,839,587  | 2 | 0 | 2 | 1 |
| Case 77 | 15 | 38,844,106  | 39,136,304  | 3 | 0 | 3 | 1 |
| Case 77 | 15 | 39,137,097  | 42,399,754  | 2 | 0 | 2 | 1 |
| Case 77 | 15 | 42,401,652  | 42,438,357  | 3 | 0 | 3 | 1 |
| Case 77 | 15 | 42,438,400  | 51,487,670  | 2 | 0 | 2 | 1 |
| Case 77 | 15 | 51,491,854  | 51,685,665  | 3 | 0 | 3 | 1 |
| Case 77 | 15 | 51,687,839  | 57,864,213  | 2 | 0 | 2 | 1 |



|         |    |             |             |   |   |   |   |
|---------|----|-------------|-------------|---|---|---|---|
| Case 77 | 15 | 57,864,355  | 58,356,362  | 3 | 0 | 3 | 1 |
| Case 77 | 15 | 58,357,800  | 60,987,230  | 2 | 0 | 2 | 1 |
| Case 77 | 15 | 60,988,120  | 61,103,590  | 3 | 0 | 3 | 1 |
| Case 77 | 15 | 61,104,895  | 61,710,312  | 2 | 0 | 2 | 1 |
| Case 77 | 15 | 61,718,875  | 62,140,034  | 3 | 0 | 3 | 1 |
| Case 77 | 15 | 62,145,214  | 67,376,000  | 2 | 0 | 2 | 1 |
| Case 77 | 15 | 67,380,609  | 67,494,494  | 3 | 0 | 3 | 1 |
| Case 77 | 15 | 67,495,926  | 75,969,152  | 2 | 0 | 2 | 1 |
| Case 77 | 15 | 75,969,335  | 76,071,821  | 3 | 0 | 3 | 1 |
| Case 77 | 15 | 76,072,030  | 76,402,624  | 2 | 0 | 2 | 1 |
| Case 77 | 15 | 76,408,090  | 76,496,217  | 3 | 0 | 3 | 1 |
| Case 77 | 15 | 76,496,231  | 81,046,125  | 2 | 0 | 2 | 1 |
| Case 77 | 15 | 81,047,003  | 81,201,537  | 3 | 0 | 3 | 1 |
| Case 77 | 15 | 81,204,918  | 86,265,782  | 2 | 0 | 2 | 1 |
| Case 77 | 15 | 86,266,306  | 86,367,767  | 3 | 0 | 3 | 1 |
| Case 77 | 15 | 86,369,430  | 91,345,348  | 2 | 0 | 2 | 1 |
| Case 77 | 15 | 91,346,789  | 91,489,935  | 4 | 0 | 4 | 1 |
| Case 77 | 15 | 91,489,936  | 91,521,337  | 3 | 0 | 3 | 1 |
| Case 77 | 15 | 91,524,209  | 92,825,832  | 2 | 0 | 2 | 1 |
| Case 77 | 15 | 92,834,134  | 93,015,650  | 3 | 0 | 3 | 1 |
| Case 77 | 15 | 93,015,721  | 93,860,509  | 2 | 0 | 2 | 1 |
| Case 77 | 15 | 93,861,129  | 93,926,846  | 3 | 0 | 3 | 1 |
| Case 77 | 15 | 93,927,305  | 95,019,969  | 2 | 0 | 2 | 1 |
| Case 77 | 15 | 95,019,993  | 95,160,050  | 3 | 0 | 3 | 1 |
| Case 77 | 15 | 95,165,051  | 96,637,443  | 2 | 0 | 2 | 1 |
| Case 77 | 15 | 96,639,263  | 96,844,005  | 3 | 0 | 3 | 1 |
| Case 77 | 15 | 96,844,084  | 100,492,789 | 2 | 0 | 2 | 1 |
| Case 77 | 15 | 100,499,365 | 100,807,344 | 3 | 0 | 3 | 1 |
| Case 77 | 15 | 100,808,087 | 101,593,619 | 2 | 0 | 2 | 1 |
| Case 77 | 15 | 101,595,629 | 101,656,088 | 3 | 0 | 3 | 1 |
| Case 77 | 15 | 101,657,719 | 101,939,918 | 2 | 0 | 2 | 1 |
| Case 77 | 15 | 101,944,959 | 102,120,339 | 3 | 0 | 3 | 1 |
| Case 77 | 15 | 102,120,895 | 102,461,162 | 2 | 0 | 2 | 1 |
| Case 77 | 16 | 88,165      | 5,658,177   | 2 | 0 | 2 | 1 |
| Case 77 | 16 | 5,660,929   | 5,874,639   | 3 | 0 | 3 | 1 |
| Case 77 | 16 | 5,878,184   | 8,428,262   | 2 | 0 | 2 | 1 |
| Case 77 | 16 | 8,430,117   | 8,534,737   | 3 | 0 | 3 | 1 |
| Case 77 | 16 | 8,536,143   | 10,975,311  | 2 | 0 | 2 | 1 |
| Case 77 | 16 | 10,979,440  | 10,998,613  | 1 | 0 | 1 | 0 |
| Case 77 | 16 | 10,998,628  | 13,229,470  | 2 | 0 | 2 | 1 |
| Case 77 | 16 | 13,229,723  | 13,421,017  | 3 | 0 | 3 | 1 |
| Case 77 | 16 | 13,427,718  | 20,380,961  | 2 | 0 | 2 | 1 |
| Case 77 | 16 | 20,380,968  | 20,563,528  | 3 | 0 | 3 | 1 |
| Case 77 | 16 | 20,564,300  | 29,180,407  | 2 | 0 | 2 | 1 |
| Case 77 | 16 | 29,182,179  | 29,906,774  | 3 | 0 | 3 | 1 |
| Case 77 | 16 | 29,907,116  | 30,080,265  | 4 | 0 | 4 | 1 |
| Case 77 | 16 | 30,080,780  | 31,392,282  | 3 | 0 | 3 | 1 |
| Case 77 | 16 | 31,392,309  | 31,545,618  | 4 | 0 | 4 | 1 |
| Case 77 | 16 | 31,563,658  | 31,580,272  | 3 | 0 | 3 | 1 |
| Case 77 | 16 | 31,602,768  | 35,285,582  | 2 | 0 | 2 | 1 |
| Case 77 | 16 | 46,450,037  | 47,703,327  | 2 | 0 | 2 | 1 |
| Case 77 | 16 | 47,727,381  | 50,059,500  | 3 | 0 | 3 | 1 |
| Case 77 | 16 | 50,059,580  | 50,138,943  | 2 | 0 | 2 | 1 |
| Case 77 | 16 | 50,142,944  | 53,144,191  | 3 | 0 | 3 | 1 |
| Case 77 | 16 | 53,145,770  | 53,479,531  | 2 | 0 | 2 | 1 |
| Case 77 | 16 | 53,479,855  | 55,536,687  | 3 | 0 | 3 | 1 |
| Case 77 | 16 | 55,536,723  | 55,694,253  | 2 | 0 | 2 | 1 |
| Case 77 | 16 | 55,700,427  | 57,349,346  | 3 | 0 | 3 | 1 |
| Case 77 | 16 | 57,351,093  | 57,483,867  | 2 | 0 | 2 | 1 |
| Case 77 | 16 | 57,484,957  | 57,758,547  | 3 | 0 | 3 | 1 |
| Case 77 | 16 | 57,758,727  | 58,079,283  | 2 | 0 | 2 | 1 |

|         |    |            |            |   |   |   |   |
|---------|----|------------|------------|---|---|---|---|
| Case 77 | 16 | 58,085,882 | 66,972,546 | 3 | 0 | 3 | 1 |
| Case 77 | 16 | 66,972,968 | 70,841,632 | 2 | 0 | 2 | 1 |
| Case 77 | 16 | 70,841,656 | 71,171,142 | 3 | 0 | 3 | 1 |
| Case 77 | 16 | 71,171,147 | 90,274,695 | 2 | 0 | 2 | 1 |
| Case 77 | 17 | 11,885     | 4,067,552  | 2 | 0 | 2 | 1 |
| Case 77 | 17 | 4,069,735  | 4,111,325  | 1 | 0 | 1 | 0 |
| Case 77 | 17 | 4,113,150  | 21,528,062 | 2 | 0 | 2 | 1 |
| Case 77 | 17 | 21,539,613 | 22,242,355 | 2 | 1 | 3 | 0 |
| Case 77 | 17 | 25,268,142 | 25,650,739 | 2 | 1 | 3 | 0 |
| Case 77 | 17 | 25,659,288 | 26,851,602 | 2 | 2 | 4 | 0 |
| Case 77 | 17 | 26,851,758 | 27,341,434 | 2 | 1 | 3 | 0 |
| Case 77 | 17 | 27,341,776 | 27,696,371 | 2 | 2 | 4 | 0 |
| Case 77 | 17 | 27,703,349 | 28,405,349 | 2 | 1 | 3 | 0 |
| Case 77 | 17 | 28,405,431 | 28,642,380 | 2 | 2 | 4 | 0 |
| Case 77 | 17 | 28,645,905 | 34,436,532 | 2 | 1 | 3 | 0 |
| Case 77 | 17 | 34,436,708 | 34,597,521 | 3 | 1 | 4 | 0 |
| Case 77 | 17 | 34,815,551 | 63,629,388 | 2 | 1 | 3 | 0 |
| Case 77 | 17 | 63,629,578 | 63,822,357 | 2 | 2 | 4 | 0 |
| Case 77 | 17 | 63,841,571 | 67,079,441 | 2 | 1 | 3 | 0 |
| Case 77 | 17 | 67,080,435 | 67,115,765 | 0 | 0 | 0 | 0 |
| Case 77 | 17 | 67,117,428 | 67,117,688 | 2 | 0 | 2 | 1 |
| Case 77 | 17 | 67,119,548 | 81,060,040 | 2 | 1 | 3 | 0 |
| Case 77 | 18 | 87,505     | 139,767    | 4 | 0 | 4 | 1 |
| Case 77 | 18 | 159,382    | 159,382    | 3 | 0 | 3 | 1 |
| Case 77 | 18 | 160,887    | 294,495    | 2 | 0 | 2 | 1 |
| Case 77 | 18 | 295,246    | 4,377,745  | 3 | 0 | 3 | 1 |
| Case 77 | 18 | 4,383,437  | 6,404,553  | 2 | 0 | 2 | 1 |
| Case 77 | 18 | 6,406,648  | 6,958,477  | 3 | 0 | 3 | 1 |
| Case 77 | 18 | 6,958,609  | 7,231,143  | 2 | 0 | 2 | 1 |
| Case 77 | 18 | 7,231,186  | 7,322,666  | 3 | 0 | 3 | 1 |
| Case 77 | 18 | 7,326,805  | 7,882,917  | 2 | 0 | 2 | 1 |
| Case 77 | 18 | 7,887,531  | 8,569,662  | 3 | 0 | 3 | 1 |
| Case 77 | 18 | 8,571,754  | 8,794,092  | 2 | 0 | 2 | 1 |
| Case 77 | 18 | 8,794,278  | 9,117,899  | 3 | 0 | 3 | 1 |
| Case 77 | 18 | 9,122,532  | 9,532,097  | 2 | 0 | 2 | 1 |
| Case 77 | 18 | 9,533,855  | 10,447,547 | 3 | 0 | 3 | 1 |
| Case 77 | 18 | 10,448,334 | 10,884,845 | 2 | 0 | 2 | 1 |
| Case 77 | 18 | 10,892,653 | 11,228,713 | 3 | 0 | 3 | 1 |
| Case 77 | 18 | 11,232,515 | 11,454,808 | 2 | 0 | 2 | 1 |
| Case 77 | 18 | 11,471,820 | 11,583,447 | 3 | 0 | 3 | 1 |
| Case 77 | 18 | 11,596,076 | 12,155,452 | 2 | 0 | 2 | 1 |
| Case 77 | 18 | 12,160,236 | 12,445,407 | 3 | 0 | 3 | 1 |
| Case 77 | 18 | 12,445,632 | 13,133,577 | 2 | 0 | 2 | 1 |
| Case 77 | 18 | 13,151,544 | 13,638,962 | 3 | 0 | 3 | 1 |
| Case 77 | 18 | 13,640,802 | 15,375,878 | 2 | 0 | 2 | 1 |
| Case 77 | 18 | 18,520,354 | 20,607,879 | 2 | 0 | 2 | 1 |
| Case 77 | 18 | 20,621,714 | 20,945,616 | 3 | 0 | 3 | 1 |
| Case 77 | 18 | 20,946,796 | 22,237,203 | 2 | 0 | 2 | 1 |
| Case 77 | 18 | 22,237,514 | 22,622,445 | 3 | 0 | 3 | 1 |
| Case 77 | 18 | 22,624,119 | 28,873,403 | 2 | 0 | 2 | 1 |
| Case 77 | 18 | 28,875,465 | 29,426,719 | 3 | 0 | 3 | 1 |
| Case 77 | 18 | 29,426,726 | 29,454,570 | 2 | 0 | 2 | 1 |
| Case 77 | 18 | 29,463,735 | 32,883,622 | 3 | 0 | 3 | 1 |
| Case 77 | 18 | 32,887,933 | 32,949,300 | 2 | 0 | 2 | 1 |
| Case 77 | 18 | 32,950,288 | 37,517,721 | 3 | 0 | 3 | 1 |
| Case 77 | 18 | 37,520,042 | 37,933,091 | 2 | 0 | 2 | 1 |
| Case 77 | 18 | 37,936,406 | 40,377,844 | 3 | 0 | 3 | 1 |
| Case 77 | 18 | 40,385,804 | 40,612,823 | 2 | 0 | 2 | 1 |
| Case 77 | 18 | 40,613,606 | 40,697,340 | 3 | 0 | 3 | 1 |
| Case 77 | 18 | 40,697,530 | 41,411,292 | 2 | 0 | 2 | 1 |
| Case 77 | 18 | 41,413,115 | 43,455,229 | 3 | 0 | 3 | 1 |

|         |    |            |            |   |   |   |   |
|---------|----|------------|------------|---|---|---|---|
| Case 77 | 18 | 43,456,297 | 43,557,625 | 2 | 0 | 2 | 1 |
| Case 77 | 18 | 43,562,102 | 50,276,380 | 3 | 0 | 3 | 1 |
| Case 77 | 18 | 50,278,480 | 50,937,026 | 2 | 0 | 2 | 1 |
| Case 77 | 18 | 50,942,514 | 55,273,918 | 3 | 0 | 3 | 1 |
| Case 77 | 18 | 55,274,824 | 55,352,724 | 2 | 0 | 2 | 1 |
| Case 77 | 18 | 55,355,674 | 55,454,377 | 3 | 0 | 3 | 1 |
| Case 77 | 18 | 55,461,863 | 55,732,192 | 4 | 0 | 4 | 1 |
| Case 77 | 18 | 55,740,404 | 57,864,141 | 3 | 0 | 3 | 1 |
| Case 77 | 18 | 57,866,384 | 58,226,713 | 2 | 0 | 2 | 1 |
| Case 77 | 18 | 58,227,112 | 62,088,914 | 3 | 0 | 3 | 1 |
| Case 77 | 18 | 62,090,963 | 62,284,201 | 2 | 0 | 2 | 1 |
| Case 77 | 18 | 62,289,513 | 63,104,519 | 3 | 0 | 3 | 1 |
| Case 77 | 18 | 63,107,169 | 63,465,500 | 2 | 0 | 2 | 1 |
| Case 77 | 18 | 63,465,538 | 63,637,562 | 3 | 0 | 3 | 1 |
| Case 77 | 18 | 63,638,807 | 64,321,112 | 2 | 0 | 2 | 1 |
| Case 77 | 18 | 64,327,944 | 68,439,731 | 3 | 0 | 3 | 1 |
| Case 77 | 18 | 68,441,007 | 78,015,180 | 2 | 0 | 2 | 1 |
| Case 77 | 19 | 260,912    | 998,126    | 2 | 1 | 3 | 0 |
| Case 77 | 19 | 1,002,847  | 1,048,950  | 2 | 0 | 2 | 1 |
| Case 77 | 19 | 1,049,360  | 1,056,399  | 1 | 0 | 1 | 0 |
| Case 77 | 19 | 1,056,410  | 1,993,033  | 2 | 0 | 2 | 1 |
| Case 77 | 19 | 1,993,101  | 2,059,585  | 3 | 0 | 3 | 1 |
| Case 77 | 19 | 2,061,715  | 10,416,617 | 2 | 0 | 2 | 1 |
| Case 77 | 19 | 10,419,130 | 13,430,747 | 2 | 1 | 3 | 0 |
| Case 77 | 19 | 13,431,565 | 13,869,786 | 2 | 2 | 4 | 0 |
| Case 77 | 19 | 13,869,794 | 14,991,963 | 2 | 1 | 3 | 0 |
| Case 77 | 19 | 14,993,370 | 15,228,542 | 2 | 2 | 4 | 0 |
| Case 77 | 19 | 15,228,739 | 15,651,359 | 2 | 1 | 3 | 0 |
| Case 77 | 19 | 15,651,365 | 15,752,023 | 2 | 2 | 4 | 0 |
| Case 77 | 19 | 15,752,137 | 16,300,190 | 2 | 1 | 3 | 0 |
| Case 77 | 19 | 16,301,100 | 16,611,868 | 2 | 2 | 4 | 0 |
| Case 77 | 19 | 16,611,886 | 18,448,105 | 2 | 1 | 3 | 0 |
| Case 77 | 19 | 18,450,713 | 18,533,642 | 2 | 0 | 2 | 1 |
| Case 77 | 19 | 18,538,708 | 20,500,515 | 2 | 1 | 3 | 0 |
| Case 77 | 19 | 20,626,179 | 20,715,228 | 0 | 0 | 0 | 0 |
| Case 77 | 19 | 20,726,622 | 20,728,777 | 2 | 0 | 2 | 1 |
| Case 77 | 19 | 20,729,120 | 23,661,800 | 2 | 1 | 3 | 0 |
| Case 77 | 19 | 23,671,926 | 23,829,737 | 2 | 2 | 4 | 0 |
| Case 77 | 19 | 23,837,145 | 24,629,285 | 2 | 1 | 3 | 0 |
| Case 77 | 19 | 27,732,159 | 28,983,692 | 2 | 1 | 3 | 0 |
| Case 77 | 19 | 28,991,292 | 30,043,222 | 2 | 2 | 4 | 0 |
| Case 77 | 19 | 30,050,566 | 30,550,513 | 2 | 1 | 3 | 0 |
| Case 77 | 19 | 30,556,283 | 32,779,619 | 2 | 2 | 4 | 0 |
| Case 77 | 19 | 32,783,217 | 33,119,653 | 2 | 1 | 3 | 0 |
| Case 77 | 19 | 33,119,742 | 33,767,568 | 2 | 2 | 4 | 0 |
| Case 77 | 19 | 33,768,921 | 34,045,675 | 2 | 1 | 3 | 0 |
| Case 77 | 19 | 34,048,308 | 36,011,878 | 2 | 2 | 4 | 0 |
| Case 77 | 19 | 36,013,455 | 38,126,406 | 2 | 1 | 3 | 0 |
| Case 77 | 19 | 38,126,813 | 38,706,989 | 2 | 2 | 4 | 0 |
| Case 77 | 19 | 38,708,477 | 43,420,322 | 2 | 1 | 3 | 0 |
| Case 77 | 19 | 43,420,327 | 43,698,606 | 2 | 2 | 4 | 0 |
| Case 77 | 19 | 43,698,669 | 44,062,890 | 2 | 1 | 3 | 0 |
| Case 77 | 19 | 44,065,115 | 44,466,156 | 2 | 2 | 4 | 0 |
| Case 77 | 19 | 44,467,096 | 44,853,707 | 2 | 1 | 3 | 0 |
| Case 77 | 19 | 44,855,873 | 45,021,252 | 2 | 2 | 4 | 0 |
| Case 77 | 19 | 45,022,672 | 45,043,644 | 2 | 1 | 3 | 0 |
| Case 77 | 19 | 45,046,352 | 45,132,364 | 3 | 1 | 4 | 0 |
| Case 77 | 19 | 45,139,812 | 46,388,473 | 2 | 1 | 3 | 0 |
| Case 77 | 19 | 46,390,280 | 46,511,617 | 2 | 2 | 4 | 0 |
| Case 77 | 19 | 46,512,517 | 46,973,245 | 2 | 1 | 3 | 0 |
| Case 77 | 19 | 46,973,314 | 47,112,740 | 2 | 2 | 4 | 0 |

|         |    |            |            |   |   |   |   |
|---------|----|------------|------------|---|---|---|---|
| Case 77 | 19 | 47,113,138 | 47,920,565 | 2 | 1 | 3 | 0 |
| Case 77 | 19 | 47,920,571 | 48,511,909 | 2 | 2 | 4 | 0 |
| Case 77 | 19 | 48,512,634 | 49,183,284 | 2 | 1 | 3 | 0 |
| Case 77 | 19 | 49,184,380 | 49,206,462 | 2 | 0 | 2 | 1 |
| Case 77 | 19 | 49,206,631 | 51,759,861 | 2 | 1 | 3 | 0 |
| Case 77 | 19 | 51,759,936 | 51,841,312 | 2 | 2 | 4 | 0 |
| Case 77 | 19 | 51,842,357 | 52,266,072 | 2 | 1 | 3 | 0 |
| Case 77 | 19 | 52,267,561 | 52,437,588 | 2 | 2 | 4 | 0 |
| Case 77 | 19 | 52,439,298 | 56,416,347 | 2 | 1 | 3 | 0 |
| Case 77 | 19 | 56,419,263 | 56,515,334 | 2 | 2 | 4 | 0 |
| Case 77 | 19 | 56,515,359 | 56,750,675 | 2 | 1 | 3 | 0 |
| Case 77 | 19 | 56,751,782 | 56,900,486 | 2 | 2 | 4 | 0 |
| Case 77 | 19 | 56,901,457 | 57,335,735 | 2 | 1 | 3 | 0 |
| Case 77 | 19 | 57,335,875 | 57,641,887 | 2 | 2 | 4 | 0 |
| Case 77 | 19 | 57,641,959 | 59,097,160 | 2 | 1 | 3 | 0 |
| Case 77 | 20 | 63,244     | 14,807,487 | 4 | 0 | 4 | 1 |
| Case 77 | 20 | 14,807,599 | 14,853,050 | 3 | 0 | 3 | 1 |
| Case 77 | 20 | 14,858,910 | 14,872,313 | 2 | 0 | 2 | 1 |
| Case 77 | 20 | 14,877,654 | 15,061,394 | 1 | 0 | 1 | 0 |
| Case 77 | 20 | 15,063,214 | 15,078,724 | 2 | 0 | 2 | 1 |
| Case 77 | 20 | 15,083,054 | 15,179,023 | 2 | 1 | 3 | 0 |
| Case 77 | 20 | 15,180,181 | 15,207,464 | 3 | 1 | 4 | 0 |
| Case 77 | 20 | 15,210,624 | 15,210,624 | 2 | 1 | 3 | 0 |
| Case 77 | 20 | 15,215,964 | 15,561,894 | 3 | 0 | 3 | 1 |
| Case 77 | 20 | 15,562,149 | 16,696,462 | 3 | 1 | 4 | 0 |
| Case 77 | 20 | 16,697,465 | 17,295,110 | 3 | 0 | 3 | 1 |
| Case 77 | 20 | 17,296,006 | 21,687,474 | 3 | 1 | 4 | 0 |
| Case 77 | 20 | 21,689,216 | 23,016,850 | 4 | 0 | 4 | 1 |
| Case 77 | 20 | 23,016,854 | 26,293,985 | 3 | 0 | 3 | 1 |
| Case 77 | 20 | 29,425,357 | 37,667,148 | 3 | 0 | 3 | 1 |
| Case 77 | 20 | 37,667,182 | 38,619,046 | 3 | 1 | 4 | 0 |
| Case 77 | 20 | 38,620,281 | 39,016,260 | 3 | 0 | 3 | 1 |
| Case 77 | 20 | 39,022,059 | 39,577,742 | 3 | 1 | 4 | 0 |
| Case 77 | 20 | 39,577,882 | 40,987,563 | 3 | 0 | 3 | 1 |
| Case 77 | 20 | 40,989,344 | 41,235,817 | 3 | 1 | 4 | 0 |
| Case 77 | 20 | 41,236,837 | 41,327,093 | 3 | 0 | 3 | 1 |
| Case 77 | 20 | 41,331,689 | 41,436,909 | 3 | 1 | 4 | 0 |
| Case 77 | 20 | 41,437,424 | 41,612,014 | 2 | 1 | 3 | 0 |
| Case 77 | 20 | 41,612,425 | 42,453,467 | 3 | 0 | 3 | 1 |
| Case 77 | 20 | 42,460,418 | 42,623,967 | 3 | 1 | 4 | 0 |
| Case 77 | 20 | 42,628,687 | 42,704,488 | 2 | 1 | 3 | 0 |
| Case 77 | 20 | 42,704,807 | 42,814,688 | 3 | 1 | 4 | 0 |
| Case 77 | 20 | 42,815,190 | 47,218,804 | 3 | 0 | 3 | 1 |
| Case 77 | 20 | 47,219,740 | 47,241,358 | 3 | 1 | 4 | 0 |
| Case 77 | 20 | 47,241,618 | 48,140,744 | 2 | 1 | 3 | 0 |
| Case 77 | 20 | 48,140,765 | 49,813,425 | 3 | 0 | 3 | 1 |
| Case 77 | 20 | 49,817,847 | 50,038,512 | 3 | 1 | 4 | 0 |
| Case 77 | 20 | 50,040,086 | 50,153,344 | 4 | 0 | 4 | 1 |
| Case 77 | 20 | 50,155,124 | 53,266,806 | 3 | 0 | 3 | 1 |
| Case 77 | 20 | 53,266,975 | 53,380,907 | 3 | 1 | 4 | 0 |
| Case 77 | 20 | 53,382,213 | 53,393,214 | 2 | 1 | 3 | 0 |
| Case 77 | 20 | 53,396,897 | 56,453,291 | 1 | 1 | 2 | 0 |
| Case 77 | 20 | 56,460,394 | 57,066,537 | 3 | 0 | 3 | 1 |
| Case 77 | 20 | 57,072,048 | 57,164,080 | 3 | 1 | 4 | 0 |
| Case 77 | 20 | 57,164,855 | 57,609,218 | 3 | 0 | 3 | 1 |
| Case 77 | 20 | 57,610,059 | 57,719,291 | 3 | 1 | 4 | 0 |
| Case 77 | 20 | 57,723,130 | 57,829,301 | 2 | 1 | 3 | 0 |
| Case 77 | 20 | 57,829,527 | 57,945,328 | 3 | 1 | 4 | 0 |
| Case 77 | 20 | 57,945,730 | 58,210,005 | 2 | 1 | 3 | 0 |
| Case 77 | 20 | 58,211,295 | 58,330,363 | 3 | 1 | 4 | 0 |
| Case 77 | 20 | 58,330,382 | 58,657,223 | 2 | 1 | 3 | 0 |

|         |    |             |             |   |   |   |   |
|---------|----|-------------|-------------|---|---|---|---|
| Case 77 | 20 | 58,659,084  | 58,725,020  | 3 | 1 | 4 | 0 |
| Case 77 | 20 | 58,725,148  | 59,307,221  | 3 | 0 | 3 | 1 |
| Case 77 | 20 | 59,309,596  | 59,592,190  | 3 | 1 | 4 | 0 |
| Case 77 | 20 | 59,594,066  | 60,177,157  | 2 | 1 | 3 | 0 |
| Case 77 | 20 | 60,179,671  | 60,364,205  | 3 | 1 | 4 | 0 |
| Case 77 | 20 | 60,365,079  | 62,948,788  | 3 | 0 | 3 | 1 |
| Case 77 | 21 | 10,827,533  | 10,971,337  | 2 | 1 | 3 | 0 |
| Case 77 | 21 | 14,368,320  | 48,100,155  | 2 | 1 | 3 | 0 |
| Case 77 | 22 | 16,114,244  | 46,327,857  | 2 | 0 | 2 | 1 |
| Case 77 | 22 | 46,341,486  | 46,458,123  | 3 | 0 | 3 | 1 |
| Case 77 | 22 | 46,459,132  | 50,918,406  | 2 | 0 | 2 | 1 |
| Case 77 | 22 | 50,921,022  | 50,921,274  | 1 | 0 | 1 | 0 |
| Case 77 | 22 | 50,921,305  | 51,195,728  | 2 | 0 | 2 | 1 |
| Case 78 | 1  | 82,154      | 17,228,131  | 1 | 1 | 2 | 0 |
| Case 78 | 1  | 17,248,532  | 17,281,359  | 0 | 0 | 0 | 0 |
| Case 78 | 1  | 17,282,425  | 92,443,803  | 1 | 1 | 2 | 0 |
| Case 78 | 1  | 92,443,824  | 94,020,247  | 1 | 0 | 1 | 0 |
| Case 78 | 1  | 94,026,080  | 100,340,252 | 1 | 1 | 2 | 0 |
| Case 78 | 1  | 100,340,312 | 100,624,961 | 1 | 0 | 1 | 0 |
| Case 78 | 1  | 100,625,029 | 121,346,616 | 1 | 1 | 2 | 0 |
| Case 78 | 1  | 142,649,718 | 152,080,129 | 1 | 1 | 2 | 0 |
| Case 78 | 1  | 152,080,173 | 152,480,654 | 2 | 1 | 3 | 0 |
| Case 78 | 1  | 152,482,587 | 156,777,017 | 1 | 1 | 2 | 0 |
| Case 78 | 1  | 156,779,505 | 158,159,393 | 2 | 1 | 3 | 0 |
| Case 78 | 1  | 158,169,866 | 158,549,011 | 1 | 1 | 2 | 0 |
| Case 78 | 1  | 158,549,043 | 160,146,173 | 2 | 1 | 3 | 0 |
| Case 78 | 1  | 160,146,341 | 162,569,023 | 1 | 1 | 2 | 0 |
| Case 78 | 1  | 162,569,077 | 162,874,457 | 2 | 1 | 3 | 0 |
| Case 78 | 1  | 162,874,838 | 165,117,250 | 1 | 1 | 2 | 0 |
| Case 78 | 1  | 165,120,633 | 165,600,146 | 2 | 1 | 3 | 0 |
| Case 78 | 1  | 165,600,606 | 176,475,180 | 1 | 1 | 2 | 0 |
| Case 78 | 1  | 176,487,700 | 178,454,768 | 2 | 1 | 3 | 0 |
| Case 78 | 1  | 178,458,708 | 181,390,870 | 1 | 1 | 2 | 0 |
| Case 78 | 1  | 181,393,238 | 182,058,955 | 2 | 1 | 3 | 0 |
| Case 78 | 1  | 182,062,812 | 201,163,290 | 1 | 1 | 2 | 0 |
| Case 78 | 1  | 201,163,305 | 201,869,484 | 2 | 1 | 3 | 0 |
| Case 78 | 1  | 201,869,489 | 205,867,013 | 1 | 1 | 2 | 0 |
| Case 78 | 1  | 205,881,194 | 206,653,438 | 2 | 1 | 3 | 0 |
| Case 78 | 1  | 206,653,842 | 207,064,400 | 1 | 1 | 2 | 0 |
| Case 78 | 1  | 207,068,672 | 209,997,448 | 2 | 1 | 3 | 0 |
| Case 78 | 1  | 209,998,662 | 213,558,937 | 1 | 1 | 2 | 0 |
| Case 78 | 1  | 213,562,365 | 214,641,548 | 2 | 1 | 3 | 0 |
| Case 78 | 1  | 214,644,771 | 218,524,632 | 1 | 1 | 2 | 0 |
| Case 78 | 1  | 218,525,588 | 220,107,917 | 2 | 1 | 3 | 0 |
| Case 78 | 1  | 220,108,918 | 223,326,347 | 1 | 1 | 2 | 0 |
| Case 78 | 1  | 223,333,907 | 227,673,227 | 2 | 1 | 3 | 0 |
| Case 78 | 1  | 227,677,506 | 228,884,405 | 1 | 1 | 2 | 0 |
| Case 78 | 1  | 228,886,880 | 235,001,591 | 2 | 1 | 3 | 0 |
| Case 78 | 1  | 235,007,056 | 236,661,920 | 1 | 1 | 2 | 0 |
| Case 78 | 1  | 236,666,907 | 244,574,657 | 2 | 1 | 3 | 0 |
| Case 78 | 1  | 244,576,717 | 245,306,896 | 1 | 1 | 2 | 0 |
| Case 78 | 1  | 245,307,406 | 246,931,242 | 2 | 1 | 3 | 0 |
| Case 78 | 1  | 246,931,824 | 247,584,075 | 1 | 1 | 2 | 0 |
| Case 78 | 1  | 247,586,336 | 249,218,992 | 2 | 1 | 3 | 0 |
| Case 78 | 2  | 18,674      | 92,081,640  | 1 | 1 | 2 | 0 |
| Case 78 | 2  | 95,429,424  | 110,977,357 | 1 | 1 | 2 | 0 |
| Case 78 | 2  | 110,980,346 | 111,451,816 | 0 | 0 | 0 | 0 |
| Case 78 | 2  | 111,463,391 | 203,628,757 | 1 | 1 | 2 | 0 |
| Case 78 | 2  | 203,631,359 | 204,165,171 | 1 | 0 | 1 | 0 |
| Case 78 | 2  | 204,169,264 | 243,048,760 | 1 | 1 | 2 | 0 |
| Case 78 | 3  | 61,495      | 57,209,197  | 1 | 1 | 2 | 0 |

|         |   |             |             |   |   |   |   |
|---------|---|-------------|-------------|---|---|---|---|
| Case 78 | 3 | 57,219,344  | 57,545,532  | 1 | 0 | 1 | 0 |
| Case 78 | 3 | 57,545,993  | 90,442,925  | 1 | 1 | 2 | 0 |
| Case 78 | 3 | 93,537,290  | 143,970,983 | 1 | 1 | 2 | 0 |
| Case 78 | 3 | 143,985,479 | 162,491,025 | 2 | 1 | 3 | 0 |
| Case 78 | 3 | 162,495,102 | 163,661,532 | 3 | 1 | 4 | 0 |
| Case 78 | 3 | 163,662,721 | 165,468,999 | 3 | 0 | 3 | 1 |
| Case 78 | 3 | 165,476,026 | 169,222,771 | 3 | 1 | 4 | 0 |
| Case 78 | 3 | 169,227,560 | 170,150,076 | 3 | 0 | 3 | 1 |
| Case 78 | 3 | 170,150,360 | 178,575,038 | 3 | 1 | 4 | 0 |
| Case 78 | 3 | 178,585,678 | 180,321,862 | 3 | 0 | 3 | 1 |
| Case 78 | 3 | 180,322,041 | 181,785,515 | 3 | 1 | 4 | 0 |
| Case 78 | 3 | 181,801,136 | 186,549,695 | 3 | 0 | 3 | 1 |
| Case 78 | 3 | 186,550,201 | 194,063,344 | 3 | 1 | 4 | 0 |
| Case 78 | 3 | 194,064,075 | 197,838,262 | 3 | 0 | 3 | 1 |
| Case 78 | 4 | 71,566      | 99,926      | 1 | 1 | 2 | 0 |
| Case 78 | 4 | 109,596     | 366,713     | 1 | 0 | 1 | 0 |
| Case 78 | 4 | 366,719     | 8,731,330   | 1 | 1 | 2 | 0 |
| Case 78 | 4 | 8,872,977   | 9,376,566   | 2 | 0 | 2 | 1 |
| Case 78 | 4 | 9,394,090   | 9,485,300   | 7 | 0 | 7 | 1 |
| Case 78 | 4 | 9,509,791   | 38,980,064  | 1 | 1 | 2 | 0 |
| Case 78 | 4 | 38,982,755  | 39,748,278  | 1 | 0 | 1 | 0 |
| Case 78 | 4 | 39,748,523  | 49,620,898  | 1 | 1 | 2 | 0 |
| Case 78 | 4 | 52,697,856  | 88,088,507  | 1 | 1 | 2 | 0 |
| Case 78 | 4 | 88,091,339  | 88,379,064  | 1 | 0 | 1 | 0 |
| Case 78 | 4 | 88,381,080  | 113,443,282 | 1 | 1 | 2 | 0 |
| Case 78 | 4 | 113,447,137 | 113,698,005 | 1 | 0 | 1 | 0 |
| Case 78 | 4 | 113,710,173 | 115,392,483 | 1 | 1 | 2 | 0 |
| Case 78 | 4 | 115,398,200 | 115,451,608 | 0 | 0 | 0 | 0 |
| Case 78 | 4 | 115,458,057 | 190,963,766 | 1 | 1 | 2 | 0 |
| Case 78 | 5 | 38,139      | 45,905,997  | 1 | 1 | 2 | 0 |
| Case 78 | 5 | 45,925,213  | 46,399,093  | 0 | 0 | 0 | 0 |
| Case 78 | 5 | 49,457,282  | 49,564,798  | 0 | 0 | 0 | 0 |
| Case 78 | 5 | 49,586,870  | 105,854,131 | 1 | 1 | 2 | 0 |
| Case 78 | 5 | 105,866,862 | 112,860,821 | 2 | 1 | 3 | 0 |
| Case 78 | 5 | 112,868,579 | 113,078,457 | 1 | 1 | 2 | 0 |
| Case 78 | 5 | 113,079,354 | 118,740,848 | 2 | 1 | 3 | 0 |
| Case 78 | 5 | 118,743,494 | 139,930,736 | 1 | 1 | 2 | 0 |
| Case 78 | 5 | 139,931,384 | 139,931,652 | 0 | 0 | 0 | 0 |
| Case 78 | 5 | 139,931,653 | 142,779,340 | 1 | 1 | 2 | 0 |
| Case 78 | 5 | 142,779,720 | 145,464,081 | 2 | 1 | 3 | 0 |
| Case 78 | 5 | 145,465,146 | 147,363,251 | 1 | 1 | 2 | 0 |
| Case 78 | 5 | 147,369,008 | 148,672,177 | 2 | 1 | 3 | 0 |
| Case 78 | 5 | 148,672,506 | 154,477,576 | 1 | 1 | 2 | 0 |
| Case 78 | 5 | 154,478,636 | 154,509,643 | 2 | 1 | 3 | 0 |
| Case 78 | 5 | 154,510,634 | 159,903,134 | 1 | 1 | 2 | 0 |
| Case 78 | 5 | 159,904,729 | 161,838,281 | 2 | 1 | 3 | 0 |
| Case 78 | 5 | 161,839,524 | 169,124,478 | 1 | 1 | 2 | 0 |
| Case 78 | 5 | 169,126,349 | 169,540,204 | 2 | 1 | 3 | 0 |
| Case 78 | 5 | 169,540,547 | 180,467,482 | 1 | 1 | 2 | 0 |
| Case 78 | 5 | 180,469,713 | 180,693,127 | 2 | 1 | 3 | 0 |
| Case 78 | 6 | 108,666     | 1,309,171   | 1 | 1 | 2 | 0 |
| Case 78 | 6 | 1,309,918   | 1,664,675   | 2 | 1 | 3 | 0 |
| Case 78 | 6 | 1,670,717   | 32,432,406  | 1 | 1 | 2 | 0 |
| Case 78 | 6 | 32,432,835  | 32,695,022  | 2 | 1 | 3 | 0 |
| Case 78 | 6 | 32,695,082  | 58,752,089  | 1 | 1 | 2 | 0 |
| Case 78 | 6 | 61,891,118  | 149,788,080 | 1 | 1 | 2 | 0 |
| Case 78 | 6 | 149,795,154 | 150,195,384 | 1 | 0 | 1 | 0 |
| Case 78 | 6 | 150,198,491 | 170,980,171 | 1 | 1 | 2 | 0 |
| Case 78 | 7 | 44,935      | 57,517,019  | 1 | 1 | 2 | 0 |
| Case 78 | 7 | 57,520,410  | 58,019,061  | 0 | 0 | 0 | 0 |
| Case 78 | 7 | 61,056,053  | 62,577,770  | 0 | 0 | 0 | 0 |

|         |   |             |             |   |   |   |   |
|---------|---|-------------|-------------|---|---|---|---|
| Case 78 | 7 | 62,627,173  | 90,425,217  | 1 | 1 | 2 | 0 |
| Case 78 | 7 | 90,449,362  | 91,503,417  | 2 | 1 | 3 | 0 |
| Case 78 | 7 | 91,503,491  | 92,837,938  | 1 | 1 | 2 | 0 |
| Case 78 | 7 | 92,844,819  | 96,230,631  | 2 | 1 | 3 | 0 |
| Case 78 | 7 | 96,230,686  | 103,015,677 | 1 | 1 | 2 | 0 |
| Case 78 | 7 | 103,017,288 | 104,653,265 | 2 | 1 | 3 | 0 |
| Case 78 | 7 | 104,660,672 | 105,488,330 | 1 | 1 | 2 | 0 |
| Case 78 | 7 | 105,494,963 | 105,673,067 | 2 | 1 | 3 | 0 |
| Case 78 | 7 | 105,673,118 | 159,119,486 | 1 | 1 | 2 | 0 |
| Case 78 | 8 | 164,984     | 5,593,810   | 1 | 1 | 2 | 0 |
| Case 78 | 8 | 5,599,399   | 5,605,087   | 0 | 0 | 0 | 0 |
| Case 78 | 8 | 5,607,214   | 8,895,470   | 1 | 1 | 2 | 0 |
| Case 78 | 8 | 8,899,621   | 9,205,584   | 2 | 1 | 3 | 0 |
| Case 78 | 8 | 9,206,425   | 9,640,400   | 1 | 1 | 2 | 0 |
| Case 78 | 8 | 9,646,560   | 11,162,452  | 2 | 1 | 3 | 0 |
| Case 78 | 8 | 11,162,477  | 13,251,758  | 1 | 1 | 2 | 0 |
| Case 78 | 8 | 13,253,898  | 14,095,199  | 2 | 1 | 3 | 0 |
| Case 78 | 8 | 14,098,105  | 18,258,151  | 1 | 1 | 2 | 0 |
| Case 78 | 8 | 18,258,196  | 21,771,080  | 2 | 1 | 3 | 0 |
| Case 78 | 8 | 21,773,384  | 23,326,033  | 1 | 1 | 2 | 0 |
| Case 78 | 8 | 23,337,410  | 26,007,894  | 2 | 1 | 3 | 0 |
| Case 78 | 8 | 26,021,965  | 26,847,397  | 1 | 1 | 2 | 0 |
| Case 78 | 8 | 26,849,975  | 27,852,488  | 2 | 1 | 3 | 0 |
| Case 78 | 8 | 27,853,359  | 36,766,896  | 1 | 1 | 2 | 0 |
| Case 78 | 8 | 36,766,917  | 37,688,572  | 2 | 1 | 3 | 0 |
| Case 78 | 8 | 37,688,966  | 40,230,928  | 1 | 1 | 2 | 0 |
| Case 78 | 8 | 40,243,954  | 40,789,256  | 2 | 1 | 3 | 0 |
| Case 78 | 8 | 40,793,533  | 43,791,691  | 1 | 1 | 2 | 0 |
| Case 78 | 8 | 46,886,735  | 55,327,862  | 1 | 1 | 2 | 0 |
| Case 78 | 8 | 55,329,422  | 55,824,925  | 2 | 1 | 3 | 0 |
| Case 78 | 8 | 55,828,934  | 58,093,977  | 1 | 1 | 2 | 0 |
| Case 78 | 8 | 58,096,278  | 58,722,902  | 2 | 1 | 3 | 0 |
| Case 78 | 8 | 58,730,597  | 62,475,438  | 1 | 1 | 2 | 0 |
| Case 78 | 8 | 62,476,530  | 63,930,289  | 2 | 1 | 3 | 0 |
| Case 78 | 8 | 63,933,190  | 65,509,486  | 1 | 1 | 2 | 0 |
| Case 78 | 8 | 65,509,694  | 66,411,615  | 2 | 1 | 3 | 0 |
| Case 78 | 8 | 66,436,618  | 68,339,888  | 1 | 1 | 2 | 0 |
| Case 78 | 8 | 68,340,332  | 70,591,817  | 2 | 1 | 3 | 0 |
| Case 78 | 8 | 70,594,420  | 77,763,550  | 1 | 1 | 2 | 0 |
| Case 78 | 8 | 77,763,592  | 80,882,568  | 2 | 1 | 3 | 0 |
| Case 78 | 8 | 80,901,524  | 92,867,682  | 1 | 1 | 2 | 0 |
| Case 78 | 8 | 92,867,821  | 94,587,666  | 2 | 1 | 3 | 0 |
| Case 78 | 8 | 94,627,082  | 102,770,464 | 1 | 1 | 2 | 0 |
| Case 78 | 8 | 102,774,580 | 103,138,045 | 2 | 1 | 3 | 0 |
| Case 78 | 8 | 103,139,683 | 105,672,856 | 1 | 1 | 2 | 0 |
| Case 78 | 8 | 105,674,943 | 106,880,649 | 2 | 1 | 3 | 0 |
| Case 78 | 8 | 106,890,347 | 121,550,719 | 1 | 1 | 2 | 0 |
| Case 78 | 8 | 121,551,200 | 122,249,282 | 2 | 1 | 3 | 0 |
| Case 78 | 8 | 122,257,320 | 124,630,352 | 1 | 1 | 2 | 0 |
| Case 78 | 8 | 124,631,864 | 125,326,262 | 2 | 1 | 3 | 0 |
| Case 78 | 8 | 125,343,256 | 126,631,628 | 1 | 1 | 2 | 0 |
| Case 78 | 8 | 126,632,368 | 130,465,043 | 2 | 1 | 3 | 0 |
| Case 78 | 8 | 130,469,412 | 131,701,038 | 1 | 1 | 2 | 0 |
| Case 78 | 8 | 131,709,637 | 141,059,415 | 2 | 1 | 3 | 0 |
| Case 78 | 8 | 141,061,798 | 142,518,112 | 1 | 1 | 2 | 0 |
| Case 78 | 8 | 142,527,473 | 143,625,032 | 2 | 1 | 3 | 0 |
| Case 78 | 8 | 143,628,958 | 146,293,414 | 1 | 1 | 2 | 0 |
| Case 78 | 9 | 46,587      | 11,711,459  | 1 | 1 | 2 | 0 |
| Case 78 | 9 | 11,714,572  | 12,194,296  | 1 | 0 | 1 | 0 |
| Case 78 | 9 | 12,194,855  | 15,290,174  | 1 | 1 | 2 | 0 |
| Case 78 | 9 | 15,291,691  | 15,876,247  | 1 | 0 | 1 | 0 |

|         |    |             |             |   |   |   |   |
|---------|----|-------------|-------------|---|---|---|---|
| Case 78 | 9  | 15,889,411  | 17,298,289  | 1 | 1 | 2 | 0 |
| Case 78 | 9  | 17,298,291  | 17,703,386  | 1 | 0 | 1 | 0 |
| Case 78 | 9  | 17,708,814  | 19,058,733  | 1 | 1 | 2 | 0 |
| Case 78 | 9  | 19,058,734  | 19,479,201  | 1 | 0 | 1 | 0 |
| Case 78 | 9  | 19,479,536  | 26,960,085  | 1 | 1 | 2 | 0 |
| Case 78 | 9  | 26,961,976  | 27,066,281  | 1 | 0 | 1 | 0 |
| Case 78 | 9  | 27,074,233  | 33,797,951  | 1 | 1 | 2 | 0 |
| Case 78 | 9  | 33,797,991  | 34,237,044  | 1 | 0 | 1 | 0 |
| Case 78 | 9  | 34,237,480  | 46,944,322  | 1 | 1 | 2 | 0 |
| Case 78 | 9  | 65,629,772  | 79,605,912  | 1 | 1 | 2 | 0 |
| Case 78 | 9  | 79,607,007  | 80,017,018  | 1 | 0 | 1 | 0 |
| Case 78 | 9  | 80,018,236  | 99,311,177  | 1 | 1 | 2 | 0 |
| Case 78 | 9  | 99,312,032  | 99,811,206  | 1 | 0 | 1 | 0 |
| Case 78 | 9  | 99,814,841  | 114,435,668 | 1 | 1 | 2 | 0 |
| Case 78 | 9  | 114,444,565 | 115,137,476 | 1 | 0 | 1 | 0 |
| Case 78 | 9  | 115,140,133 | 127,781,208 | 1 | 1 | 2 | 0 |
| Case 78 | 9  | 127,781,259 | 128,099,572 | 1 | 0 | 1 | 0 |
| Case 78 | 9  | 128,099,707 | 140,007,817 | 1 | 1 | 2 | 0 |
| Case 78 | 9  | 140,007,869 | 140,391,739 | 1 | 0 | 1 | 0 |
| Case 78 | 9  | 140,392,494 | 141,066,491 | 1 | 1 | 2 | 0 |
| Case 78 | 10 | 98,087      | 27,168,850  | 1 | 1 | 2 | 0 |
| Case 78 | 10 | 27,170,960  | 27,648,069  | 1 | 0 | 1 | 0 |
| Case 78 | 10 | 27,648,950  | 39,097,912  | 1 | 1 | 2 | 0 |
| Case 78 | 10 | 42,436,301  | 58,892,275  | 1 | 1 | 2 | 0 |
| Case 78 | 10 | 58,904,859  | 58,941,396  | 0 | 0 | 0 | 0 |
| Case 78 | 10 | 58,943,359  | 135,477,883 | 1 | 1 | 2 | 0 |
| Case 78 | 11 | 193,146     | 12,260,083  | 1 | 1 | 2 | 0 |
| Case 78 | 11 | 12,260,355  | 12,342,923  | 2 | 1 | 3 | 0 |
| Case 78 | 11 | 12,343,617  | 50,332,064  | 1 | 1 | 2 | 0 |
| Case 78 | 11 | 50,345,390  | 51,372,036  | 0 | 0 | 0 | 0 |
| Case 78 | 11 | 51,379,204  | 51,591,253  | 1 | 1 | 2 | 0 |
| Case 78 | 11 | 54,794,237  | 108,043,912 | 1 | 1 | 2 | 0 |
| Case 78 | 11 | 108,043,924 | 108,203,619 | 1 | 0 | 1 | 0 |
| Case 78 | 11 | 108,205,074 | 134,934,063 | 1 | 1 | 2 | 0 |
| Case 78 | 12 | 191,619     | 943,953     | 1 | 1 | 2 | 0 |
| Case 78 | 12 | 966,124     | 1,438,761   | 1 | 0 | 1 | 0 |
| Case 78 | 12 | 1,440,828   | 10,423,260  | 1 | 1 | 2 | 0 |
| Case 78 | 12 | 10,424,627  | 10,742,415  | 1 | 0 | 1 | 0 |
| Case 78 | 12 | 10,743,718  | 32,050,598  | 1 | 1 | 2 | 0 |
| Case 78 | 12 | 32,052,422  | 32,211,642  | 1 | 0 | 1 | 0 |
| Case 78 | 12 | 32,213,611  | 34,362,752  | 1 | 1 | 2 | 0 |
| Case 78 | 12 | 34,375,830  | 34,853,011  | 0 | 0 | 0 | 0 |
| Case 78 | 12 | 37,876,400  | 38,359,611  | 0 | 0 | 0 | 0 |
| Case 78 | 12 | 38,416,139  | 77,472,927  | 1 | 1 | 2 | 0 |
| Case 78 | 12 | 77,476,343  | 77,644,940  | 2 | 0 | 2 | 1 |
| Case 78 | 12 | 77,652,464  | 77,738,005  | 7 | 0 | 7 | 1 |
| Case 78 | 12 | 77,738,350  | 133,810,935 | 1 | 1 | 2 | 0 |
| Case 78 | 13 | 19,058,717  | 21,787,356  | 1 | 1 | 2 | 0 |
| Case 78 | 13 | 21,789,062  | 68,394,998  | 2 | 1 | 3 | 0 |
| Case 78 | 13 | 68,407,804  | 69,456,954  | 1 | 1 | 2 | 0 |
| Case 78 | 13 | 69,459,232  | 115,103,529 | 2 | 1 | 3 | 0 |
| Case 78 | 14 | 19,280,733  | 20,295,510  | 1 | 1 | 2 | 0 |
| Case 78 | 14 | 20,295,627  | 20,404,671  | 4 | 0 | 4 | 1 |
| Case 78 | 14 | 20,404,736  | 20,420,338  | 7 | 0 | 7 | 1 |
| Case 78 | 14 | 20,425,051  | 22,599,159  | 1 | 1 | 2 | 0 |
| Case 78 | 14 | 22,605,173  | 23,027,378  | 2 | 1 | 3 | 0 |
| Case 78 | 14 | 23,030,669  | 31,359,404  | 1 | 1 | 2 | 0 |
| Case 78 | 14 | 31,360,281  | 32,294,740  | 1 | 0 | 1 | 0 |
| Case 78 | 14 | 32,295,912  | 34,892,508  | 1 | 1 | 2 | 0 |
| Case 78 | 14 | 34,895,977  | 36,444,307  | 1 | 0 | 1 | 0 |
| Case 78 | 14 | 36,449,424  | 39,245,852  | 1 | 1 | 2 | 0 |



|         |    |            |             |   |   |   |   |
|---------|----|------------|-------------|---|---|---|---|
| Case 78 | 14 | 39,260,562 | 39,870,386  | 1 | 0 | 1 | 0 |
| Case 78 | 14 | 39,870,733 | 40,737,807  | 1 | 1 | 2 | 0 |
| Case 78 | 14 | 40,741,347 | 41,113,499  | 1 | 0 | 1 | 0 |
| Case 78 | 14 | 41,118,098 | 45,606,301  | 1 | 1 | 2 | 0 |
| Case 78 | 14 | 45,606,387 | 46,505,937  | 1 | 0 | 1 | 0 |
| Case 78 | 14 | 46,531,972 | 58,669,409  | 1 | 1 | 2 | 0 |
| Case 78 | 14 | 58,669,637 | 59,097,472  | 1 | 0 | 1 | 0 |
| Case 78 | 14 | 59,101,448 | 63,784,452  | 1 | 1 | 2 | 0 |
| Case 78 | 14 | 63,786,357 | 64,546,757  | 1 | 0 | 1 | 0 |
| Case 78 | 14 | 64,547,323 | 73,958,867  | 1 | 1 | 2 | 0 |
| Case 78 | 14 | 73,959,215 | 74,687,481  | 1 | 0 | 1 | 0 |
| Case 78 | 14 | 74,688,962 | 91,927,861  | 1 | 1 | 2 | 0 |
| Case 78 | 14 | 91,931,029 | 92,657,378  | 1 | 0 | 1 | 0 |
| Case 78 | 14 | 92,659,010 | 93,684,814  | 1 | 1 | 2 | 0 |
| Case 78 | 14 | 93,685,055 | 94,084,641  | 1 | 0 | 1 | 0 |
| Case 78 | 14 | 94,087,775 | 107,287,663 | 1 | 1 | 2 | 0 |
| Case 78 | 15 | 20,034,919 | 30,737,344  | 1 | 1 | 2 | 0 |
| Case 78 | 15 | 30,919,043 | 31,106,826  | 0 | 0 | 0 | 0 |
| Case 78 | 15 | 31,108,789 | 102,461,162 | 1 | 1 | 2 | 0 |
| Case 78 | 16 | 88,165     | 35,285,582  | 1 | 1 | 2 | 0 |
| Case 78 | 16 | 46,450,037 | 51,123,801  | 1 | 1 | 2 | 0 |
| Case 78 | 16 | 51,126,732 | 52,033,613  | 2 | 1 | 3 | 0 |
| Case 78 | 16 | 52,037,601 | 55,109,891  | 1 | 1 | 2 | 0 |
| Case 78 | 16 | 55,110,037 | 55,946,322  | 2 | 1 | 3 | 0 |
| Case 78 | 16 | 55,947,034 | 65,722,555  | 1 | 1 | 2 | 0 |
| Case 78 | 16 | 65,722,818 | 66,104,842  | 2 | 1 | 3 | 0 |
| Case 78 | 16 | 66,107,935 | 86,401,481  | 1 | 1 | 2 | 0 |
| Case 78 | 16 | 86,402,109 | 87,303,835  | 2 | 1 | 3 | 0 |
| Case 78 | 16 | 87,305,069 | 90,274,695  | 1 | 1 | 2 | 0 |
| Case 78 | 17 | 11,885     | 1,154,536   | 1 | 1 | 2 | 0 |
| Case 78 | 17 | 1,156,296  | 4,875,566   | 2 | 0 | 2 | 1 |
| Case 78 | 17 | 4,875,628  | 4,875,691   | 7 | 0 | 7 | 1 |
| Case 78 | 17 | 4,876,147  | 15,039,528  | 1 | 1 | 2 | 0 |
| Case 78 | 17 | 15,044,804 | 15,058,991  | 0 | 0 | 0 | 0 |
| Case 78 | 17 | 15,060,561 | 16,892,265  | 1 | 1 | 2 | 0 |
| Case 78 | 17 | 16,892,841 | 21,717,727  | 2 | 0 | 2 | 1 |
| Case 78 | 17 | 21,729,039 | 21,736,353  | 7 | 0 | 7 | 1 |
| Case 78 | 17 | 21,743,877 | 22,242,355  | 1 | 1 | 2 | 0 |
| Case 78 | 17 | 25,268,142 | 25,808,400  | 1 | 1 | 2 | 0 |
| Case 78 | 17 | 25,816,712 | 26,723,929  | 2 | 1 | 3 | 0 |
| Case 78 | 17 | 26,725,265 | 30,745,742  | 1 | 1 | 2 | 0 |
| Case 78 | 17 | 30,752,964 | 35,136,847  | 2 | 1 | 3 | 0 |
| Case 78 | 17 | 35,137,651 | 35,294,112  | 3 | 1 | 4 | 0 |
| Case 78 | 17 | 35,295,653 | 35,687,137  | 3 | 0 | 3 | 1 |
| Case 78 | 17 | 35,694,047 | 36,498,948  | 5 | 0 | 5 | 1 |
| Case 78 | 17 | 36,498,955 | 37,576,154  | 6 | 0 | 6 | 1 |
| Case 78 | 17 | 37,580,042 | 38,245,791  | 7 | 0 | 7 | 1 |
| Case 78 | 17 | 38,248,354 | 41,180,772  | 1 | 1 | 2 | 0 |
| Case 78 | 17 | 41,188,342 | 41,428,061  | 1 | 0 | 1 | 0 |
| Case 78 | 17 | 41,433,660 | 81,060,040  | 1 | 1 | 2 | 0 |
| Case 78 | 18 | 87,505     | 15,375,878  | 1 | 1 | 2 | 0 |
| Case 78 | 18 | 18,520,354 | 78,015,180  | 1 | 1 | 2 | 0 |
| Case 78 | 19 | 260,912    | 1,049,360   | 1 | 1 | 2 | 0 |
| Case 78 | 19 | 1,049,396  | 1,272,040   | 1 | 0 | 1 | 0 |
| Case 78 | 19 | 1,272,049  | 8,127,331   | 1 | 1 | 2 | 0 |
| Case 78 | 19 | 8,128,460  | 8,156,221   | 0 | 0 | 0 | 0 |
| Case 78 | 19 | 8,156,357  | 9,226,265   | 1 | 1 | 2 | 0 |
| Case 78 | 19 | 9,226,425  | 9,945,935   | 1 | 0 | 1 | 0 |
| Case 78 | 19 | 9,946,917  | 11,727,503  | 1 | 1 | 2 | 0 |
| Case 78 | 19 | 11,727,763 | 12,691,185  | 0 | 0 | 0 | 0 |
| Case 78 | 19 | 12,691,335 | 19,770,513  | 1 | 1 | 2 | 0 |

|         |    |             |             |   |   |   |   |
|---------|----|-------------|-------------|---|---|---|---|
| Case 78 | 19 | 19,770,591  | 24,629,285  | 1 | 0 | 1 | 0 |
| Case 78 | 19 | 27,732,159  | 28,243,881  | 1 | 0 | 1 | 0 |
| Case 78 | 19 | 28,246,742  | 36,592,569  | 1 | 1 | 2 | 0 |
| Case 78 | 19 | 36,593,666  | 38,376,594  | 1 | 0 | 1 | 0 |
| Case 78 | 19 | 38,376,804  | 40,485,978  | 1 | 1 | 2 | 0 |
| Case 78 | 19 | 40,486,136  | 40,658,577  | 1 | 0 | 1 | 0 |
| Case 78 | 19 | 40,667,691  | 41,341,589  | 1 | 1 | 2 | 0 |
| Case 78 | 19 | 41,350,895  | 41,379,148  | 0 | 0 | 0 | 0 |
| Case 78 | 19 | 41,382,476  | 44,302,624  | 1 | 1 | 2 | 0 |
| Case 78 | 19 | 44,303,066  | 44,849,565  | 1 | 0 | 1 | 0 |
| Case 78 | 19 | 44,853,707  | 49,062,495  | 1 | 1 | 2 | 0 |
| Case 78 | 19 | 49,062,563  | 49,174,077  | 1 | 0 | 1 | 0 |
| Case 78 | 19 | 49,174,170  | 52,376,032  | 1 | 1 | 2 | 0 |
| Case 78 | 19 | 52,376,040  | 54,011,384  | 1 | 0 | 1 | 0 |
| Case 78 | 19 | 54,017,258  | 57,864,488  | 1 | 1 | 2 | 0 |
| Case 78 | 19 | 57,866,873  | 58,491,149  | 1 | 0 | 1 | 0 |
| Case 78 | 19 | 58,491,461  | 59,097,160  | 1 | 1 | 2 | 0 |
| Case 78 | 20 | 63,244      | 26,293,985  | 1 | 1 | 2 | 0 |
| Case 78 | 20 | 29,425,357  | 32,880,243  | 1 | 1 | 2 | 0 |
| Case 78 | 20 | 32,881,902  | 62,948,788  | 2 | 1 | 3 | 0 |
| Case 78 | 21 | 10,827,533  | 10,971,337  | 1 | 1 | 2 | 0 |
| Case 78 | 21 | 14,368,320  | 17,761,933  | 1 | 1 | 2 | 0 |
| Case 78 | 21 | 17,762,041  | 18,388,348  | 1 | 0 | 1 | 0 |
| Case 78 | 21 | 18,393,009  | 20,868,326  | 1 | 1 | 2 | 0 |
| Case 78 | 21 | 20,871,728  | 23,579,133  | 1 | 0 | 1 | 0 |
| Case 78 | 21 | 23,583,805  | 34,621,138  | 1 | 1 | 2 | 0 |
| Case 78 | 21 | 34,624,976  | 35,166,803  | 1 | 0 | 1 | 0 |
| Case 78 | 21 | 35,168,029  | 40,492,274  | 1 | 1 | 2 | 0 |
| Case 78 | 21 | 40,492,859  | 40,941,498  | 1 | 0 | 1 | 0 |
| Case 78 | 21 | 40,942,788  | 41,008,956  | 1 | 1 | 2 | 0 |
| Case 78 | 21 | 41,010,801  | 41,260,260  | 2 | 1 | 3 | 0 |
| Case 78 | 21 | 41,261,290  | 48,100,155  | 1 | 1 | 2 | 0 |
| Case 78 | 22 | 16,114,244  | 51,195,728  | 1 | 1 | 2 | 0 |
| Case 79 | 1  | 82,154      | 12,907,689  | 1 | 1 | 2 | 0 |
| Case 79 | 1  | 12,913,896  | 12,920,053  | 4 | 1 | 5 | 0 |
| Case 79 | 1  | 12,921,252  | 73,736,562  | 1 | 1 | 2 | 0 |
| Case 79 | 1  | 73,742,019  | 73,910,055  | 5 | 0 | 5 | 1 |
| Case 79 | 1  | 73,927,488  | 121,346,616 | 1 | 1 | 2 | 0 |
| Case 79 | 1  | 142,649,718 | 249,218,992 | 1 | 1 | 2 | 0 |
| Case 79 | 2  | 18,674      | 92,081,640  | 1 | 1 | 2 | 0 |
| Case 79 | 2  | 95,429,424  | 109,381,215 | 1 | 1 | 2 | 0 |
| Case 79 | 2  | 109,381,326 | 109,498,997 | 1 | 0 | 1 | 0 |
| Case 79 | 2  | 109,501,066 | 152,293,365 | 1 | 1 | 2 | 0 |
| Case 79 | 2  | 152,293,370 | 152,331,418 | 1 | 0 | 1 | 0 |
| Case 79 | 2  | 152,331,745 | 243,048,760 | 1 | 1 | 2 | 0 |
| Case 79 | 3  | 61,495      | 37,323,488  | 1 | 1 | 2 | 0 |
| Case 79 | 3  | 37,323,645  | 37,458,851  | 1 | 0 | 1 | 0 |
| Case 79 | 3  | 37,458,926  | 44,598,609  | 1 | 1 | 2 | 0 |
| Case 79 | 3  | 44,598,757  | 44,884,687  | 1 | 0 | 1 | 0 |
| Case 79 | 3  | 44,889,517  | 90,442,925  | 1 | 1 | 2 | 0 |
| Case 79 | 3  | 93,537,290  | 197,838,262 | 1 | 1 | 2 | 0 |
| Case 79 | 4  | 71,566      | 502,911     | 1 | 0 | 1 | 0 |
| Case 79 | 4  | 504,012     | 2,160,925   | 1 | 1 | 2 | 0 |
| Case 79 | 4  | 2,160,940   | 2,238,099   | 1 | 0 | 1 | 0 |
| Case 79 | 4  | 2,240,337   | 49,620,898  | 1 | 1 | 2 | 0 |
| Case 79 | 4  | 52,697,856  | 190,963,766 | 1 | 1 | 2 | 0 |
| Case 79 | 5  | 38,139      | 37,770,836  | 1 | 1 | 2 | 0 |
| Case 79 | 5  | 37,772,221  | 38,368,719  | 2 | 1 | 3 | 0 |
| Case 79 | 5  | 38,370,101  | 46,399,093  | 1 | 1 | 2 | 0 |
| Case 79 | 5  | 49,457,282  | 79,686,227  | 1 | 1 | 2 | 0 |
| Case 79 | 5  | 79,695,370  | 79,812,343  | 1 | 0 | 1 | 0 |

|         |   |             |             |   |   |   |   |
|---------|---|-------------|-------------|---|---|---|---|
| Case 79 | 5 | 79,815,529  | 89,687,267  | 1 | 1 | 2 | 0 |
| Case 79 | 5 | 89,702,241  | 90,077,028  | 1 | 0 | 1 | 0 |
| Case 79 | 5 | 90,079,067  | 139,930,736 | 1 | 1 | 2 | 0 |
| Case 79 | 5 | 139,931,384 | 139,931,652 | 0 | 0 | 0 | 0 |
| Case 79 | 5 | 139,931,653 | 180,693,127 | 1 | 1 | 2 | 0 |
| Case 79 | 6 | 108,666     | 31,192,796  | 1 | 1 | 2 | 0 |
| Case 79 | 6 | 31,193,155  | 31,232,111  | 1 | 0 | 1 | 0 |
| Case 79 | 6 | 31,232,543  | 58,752,089  | 1 | 1 | 2 | 0 |
| Case 79 | 6 | 61,891,118  | 170,980,171 | 1 | 1 | 2 | 0 |
| Case 79 | 7 | 44,935      | 26,565,535  | 1 | 1 | 2 | 0 |
| Case 79 | 7 | 26,566,266  | 26,597,211  | 2 | 1 | 3 | 0 |
| Case 79 | 7 | 26,600,300  | 57,882,950  | 1 | 1 | 2 | 0 |
| Case 79 | 7 | 58,007,774  | 58,019,061  | 0 | 0 | 0 | 0 |
| Case 79 | 7 | 61,056,053  | 62,561,412  | 0 | 0 | 0 | 0 |
| Case 79 | 7 | 62,577,770  | 100,674,467 | 1 | 1 | 2 | 0 |
| Case 79 | 7 | 100,674,899 | 100,685,715 | 1 | 0 | 1 | 0 |
| Case 79 | 7 | 100,685,727 | 159,119,486 | 1 | 1 | 2 | 0 |
| Case 79 | 8 | 164,984     | 196,327     | 1 | 0 | 1 | 0 |
| Case 79 | 8 | 196,884     | 27,595,880  | 1 | 1 | 2 | 0 |
| Case 79 | 8 | 27,596,623  | 27,715,116  | 1 | 0 | 1 | 0 |
| Case 79 | 8 | 27,718,347  | 43,791,691  | 1 | 1 | 2 | 0 |
| Case 79 | 8 | 46,886,735  | 53,973,180  | 1 | 1 | 2 | 0 |
| Case 79 | 8 | 53,975,616  | 54,453,422  | 2 | 1 | 3 | 0 |
| Case 79 | 8 | 54,454,745  | 55,198,267  | 1 | 1 | 2 | 0 |
| Case 79 | 8 | 55,198,858  | 55,423,687  | 2 | 1 | 3 | 0 |
| Case 79 | 8 | 55,427,589  | 59,515,933  | 1 | 1 | 2 | 0 |
| Case 79 | 8 | 59,517,958  | 61,586,261  | 2 | 1 | 3 | 0 |
| Case 79 | 8 | 61,590,175  | 62,171,565  | 1 | 1 | 2 | 0 |
| Case 79 | 8 | 62,172,668  | 63,915,482  | 2 | 1 | 3 | 0 |
| Case 79 | 8 | 63,922,114  | 73,987,487  | 1 | 1 | 2 | 0 |
| Case 79 | 8 | 73,990,808  | 75,227,537  | 2 | 1 | 3 | 0 |
| Case 79 | 8 | 75,227,675  | 79,825,547  | 1 | 1 | 2 | 0 |
| Case 79 | 8 | 79,831,262  | 80,237,893  | 2 | 1 | 3 | 0 |
| Case 79 | 8 | 80,239,298  | 90,132,402  | 1 | 1 | 2 | 0 |
| Case 79 | 8 | 90,133,583  | 90,357,820  | 2 | 1 | 3 | 0 |
| Case 79 | 8 | 90,366,827  | 103,428,008 | 1 | 1 | 2 | 0 |
| Case 79 | 8 | 103,430,407 | 103,732,321 | 2 | 1 | 3 | 0 |
| Case 79 | 8 | 103,732,337 | 107,278,277 | 1 | 1 | 2 | 0 |
| Case 79 | 8 | 107,280,050 | 107,669,928 | 2 | 1 | 3 | 0 |
| Case 79 | 8 | 107,682,407 | 108,462,641 | 1 | 1 | 2 | 0 |
| Case 79 | 8 | 108,463,603 | 110,345,261 | 2 | 1 | 3 | 0 |
| Case 79 | 8 | 110,346,363 | 113,748,216 | 1 | 1 | 2 | 0 |
| Case 79 | 8 | 113,748,657 | 115,003,926 | 2 | 1 | 3 | 0 |
| Case 79 | 8 | 115,004,205 | 118,662,584 | 1 | 1 | 2 | 0 |
| Case 79 | 8 | 118,663,018 | 119,246,066 | 2 | 1 | 3 | 0 |
| Case 79 | 8 | 119,247,995 | 122,641,109 | 1 | 1 | 2 | 0 |
| Case 79 | 8 | 122,642,363 | 122,975,593 | 2 | 1 | 3 | 0 |
| Case 79 | 8 | 122,976,795 | 127,208,253 | 1 | 1 | 2 | 0 |
| Case 79 | 8 | 127,225,738 | 129,249,391 | 2 | 1 | 3 | 0 |
| Case 79 | 8 | 129,250,493 | 133,045,372 | 1 | 1 | 2 | 0 |
| Case 79 | 8 | 133,045,399 | 133,685,650 | 2 | 1 | 3 | 0 |
| Case 79 | 8 | 133,690,193 | 135,346,972 | 1 | 1 | 2 | 0 |
| Case 79 | 8 | 135,348,578 | 137,079,029 | 2 | 1 | 3 | 0 |
| Case 79 | 8 | 137,090,664 | 140,300,344 | 1 | 1 | 2 | 0 |
| Case 79 | 8 | 140,300,612 | 141,100,784 | 2 | 1 | 3 | 0 |
| Case 79 | 8 | 141,100,950 | 142,452,509 | 1 | 1 | 2 | 0 |
| Case 79 | 8 | 142,453,585 | 142,972,130 | 2 | 1 | 3 | 0 |
| Case 79 | 8 | 142,972,383 | 146,293,414 | 1 | 1 | 2 | 0 |
| Case 79 | 9 | 46,587      | 5,196,253   | 1 | 1 | 2 | 0 |
| Case 79 | 9 | 5,200,127   | 5,302,095   | 1 | 0 | 1 | 0 |
| Case 79 | 9 | 5,306,824   | 17,167,963  | 1 | 1 | 2 | 0 |

|         |    |             |             |   |   |   |   |
|---------|----|-------------|-------------|---|---|---|---|
| Case 79 | 9  | 17,181,174  | 17,416,158  | 1 | 0 | 1 | 0 |
| Case 79 | 9  | 17,417,026  | 26,923,285  | 1 | 1 | 2 | 0 |
| Case 79 | 9  | 26,923,304  | 27,095,072  | 1 | 0 | 1 | 0 |
| Case 79 | 9  | 27,098,940  | 29,024,894  | 1 | 1 | 2 | 0 |
| Case 79 | 9  | 29,032,248  | 29,400,712  | 2 | 1 | 3 | 0 |
| Case 79 | 9  | 29,402,291  | 36,697,735  | 1 | 1 | 2 | 0 |
| Case 79 | 9  | 36,702,096  | 37,056,373  | 2 | 1 | 3 | 0 |
| Case 79 | 9  | 37,066,231  | 46,944,322  | 1 | 1 | 2 | 0 |
| Case 79 | 9  | 65,629,772  | 79,829,278  | 1 | 1 | 2 | 0 |
| Case 79 | 9  | 79,835,101  | 80,014,376  | 1 | 0 | 1 | 0 |
| Case 79 | 9  | 80,017,018  | 99,519,505  | 1 | 1 | 2 | 0 |
| Case 79 | 9  | 99,521,119  | 99,525,487  | 0 | 0 | 0 | 0 |
| Case 79 | 9  | 99,525,494  | 141,066,491 | 1 | 1 | 2 | 0 |
| Case 79 | 10 | 98,087      | 38,672,399  | 1 | 1 | 2 | 0 |
| Case 79 | 10 | 38,674,609  | 39,097,912  | 1 | 0 | 1 | 0 |
| Case 79 | 10 | 42,436,301  | 42,907,260  | 1 | 0 | 1 | 0 |
| Case 79 | 10 | 42,916,042  | 91,477,234  | 1 | 1 | 2 | 0 |
| Case 79 | 10 | 91,477,337  | 91,522,558  | 1 | 0 | 1 | 0 |
| Case 79 | 10 | 91,522,564  | 135,477,883 | 1 | 1 | 2 | 0 |
| Case 79 | 11 | 193,146     | 51,591,253  | 1 | 1 | 2 | 0 |
| Case 79 | 11 | 54,794,237  | 134,934,063 | 1 | 1 | 2 | 0 |
| Case 79 | 12 | 191,619     | 7,993,316   | 1 | 1 | 2 | 0 |
| Case 79 | 12 | 8,000,912   | 8,125,745   | 5 | 0 | 5 | 1 |
| Case 79 | 12 | 8,130,958   | 21,013,948  | 1 | 1 | 2 | 0 |
| Case 79 | 12 | 21,014,030  | 21,411,854  | 1 | 0 | 1 | 0 |
| Case 79 | 12 | 21,416,413  | 34,819,926  | 1 | 1 | 2 | 0 |
| Case 79 | 12 | 34,826,574  | 34,853,011  | 1 | 0 | 1 | 0 |
| Case 79 | 12 | 37,876,400  | 38,653,605  | 1 | 0 | 1 | 0 |
| Case 79 | 12 | 38,655,232  | 88,390,262  | 1 | 1 | 2 | 0 |
| Case 79 | 12 | 88,393,916  | 88,589,256  | 1 | 0 | 1 | 0 |
| Case 79 | 12 | 88,624,902  | 133,732,604 | 1 | 1 | 2 | 0 |
| Case 79 | 12 | 133,732,685 | 133,810,935 | 1 | 0 | 1 | 0 |
| Case 79 | 13 | 19,058,717  | 115,103,529 | 1 | 1 | 2 | 0 |
| Case 79 | 14 | 19,280,733  | 20,420,338  | 1 | 0 | 1 | 0 |
| Case 79 | 14 | 20,425,051  | 45,606,387  | 1 | 1 | 2 | 0 |
| Case 79 | 14 | 45,618,040  | 45,716,152  | 1 | 0 | 1 | 0 |
| Case 79 | 14 | 45,716,366  | 92,436,177  | 1 | 1 | 2 | 0 |
| Case 79 | 14 | 92,436,180  | 92,499,348  | 1 | 0 | 1 | 0 |
| Case 79 | 14 | 92,503,576  | 107,287,663 | 1 | 1 | 2 | 0 |
| Case 79 | 15 | 20,034,919  | 20,212,798  | 1 | 1 | 2 | 0 |
| Case 79 | 15 | 20,612,840  | 22,427,966  | 4 | 1 | 5 | 0 |
| Case 79 | 15 | 22,652,330  | 62,135,922  | 1 | 1 | 2 | 0 |
| Case 79 | 15 | 62,140,034  | 62,300,870  | 1 | 0 | 1 | 0 |
| Case 79 | 15 | 62,300,929  | 102,461,162 | 1 | 1 | 2 | 0 |
| Case 79 | 16 | 88,165      | 35,285,582  | 1 | 1 | 2 | 0 |
| Case 79 | 16 | 46,450,037  | 55,778,836  | 1 | 1 | 2 | 0 |
| Case 79 | 16 | 55,779,556  | 55,863,049  | 3 | 0 | 3 | 1 |
| Case 79 | 16 | 55,864,452  | 72,276,824  | 1 | 1 | 2 | 0 |
| Case 79 | 16 | 72,291,732  | 72,314,252  | 4 | 1 | 5 | 0 |
| Case 79 | 16 | 72,329,510  | 90,274,695  | 1 | 1 | 2 | 0 |
| Case 79 | 17 | 11,885      | 10,251,811  | 1 | 1 | 2 | 0 |
| Case 79 | 17 | 10,253,908  | 10,428,620  | 1 | 0 | 1 | 0 |
| Case 79 | 17 | 10,428,863  | 22,242,355  | 1 | 1 | 2 | 0 |
| Case 79 | 17 | 25,268,142  | 37,676,209  | 1 | 1 | 2 | 0 |
| Case 79 | 17 | 37,682,375  | 37,899,280  | 5 | 2 | 7 | 0 |
| Case 79 | 17 | 37,899,652  | 38,073,569  | 4 | 0 | 4 | 1 |
| Case 79 | 17 | 38,074,518  | 38,405,037  | 2 | 1 | 3 | 0 |
| Case 79 | 17 | 38,406,907  | 38,430,059  | 1 | 1 | 2 | 0 |
| Case 79 | 17 | 38,443,493  | 38,671,228  | 6 | 0 | 6 | 1 |
| Case 79 | 17 | 38,698,666  | 39,122,939  | 4 | 0 | 4 | 1 |
| Case 79 | 17 | 39,134,541  | 39,637,832  | 1 | 1 | 2 | 0 |

|         |    |            |            |   |   |   |   |
|---------|----|------------|------------|---|---|---|---|
| Case 79 | 17 | 39,638,548 | 39,974,665 | 4 | 0 | 4 | 1 |
| Case 79 | 17 | 39,975,563 | 81,060,040 | 1 | 1 | 2 | 0 |
| Case 79 | 18 | 87,505     | 15,375,878 | 1 | 1 | 2 | 0 |
| Case 79 | 18 | 18,520,354 | 78,015,180 | 1 | 1 | 2 | 0 |
| Case 79 | 19 | 260,912    | 697,514    | 1 | 1 | 2 | 0 |
| Case 79 | 19 | 699,109    | 903,120    | 1 | 0 | 1 | 0 |
| Case 79 | 19 | 904,528    | 2,833,943  | 1 | 1 | 2 | 0 |
| Case 79 | 19 | 2,834,080  | 2,939,366  | 1 | 0 | 1 | 0 |
| Case 79 | 19 | 2,939,396  | 9,380,978  | 1 | 1 | 2 | 0 |
| Case 79 | 19 | 9,395,584  | 9,886,283  | 1 | 0 | 1 | 0 |
| Case 79 | 19 | 9,912,917  | 11,819,193 | 1 | 1 | 2 | 0 |
| Case 79 | 19 | 11,828,410 | 12,768,913 | 1 | 0 | 1 | 0 |
| Case 79 | 19 | 12,768,948 | 19,822,049 | 1 | 1 | 2 | 0 |
| Case 79 | 19 | 19,822,451 | 19,823,734 | 0 | 1 | 0 | 0 |
| Case 79 | 19 | 19,824,850 | 19,902,916 | 1 | 1 | 2 | 0 |
| Case 79 | 19 | 19,905,376 | 20,118,066 | 1 | 0 | 1 | 0 |
| Case 79 | 19 | 20,123,246 | 21,233,388 | 1 | 1 | 2 | 0 |
| Case 79 | 19 | 21,239,478 | 22,031,822 | 1 | 0 | 1 | 0 |
| Case 79 | 19 | 22,034,819 | 23,804,041 | 1 | 1 | 2 | 0 |
| Case 79 | 19 | 23,814,365 | 24,629,285 | 1 | 0 | 1 | 0 |
| Case 79 | 19 | 27,732,159 | 28,319,922 | 1 | 0 | 1 | 0 |
| Case 79 | 19 | 28,327,584 | 37,285,393 | 1 | 1 | 2 | 0 |
| Case 79 | 19 | 37,289,017 | 37,442,926 | 1 | 0 | 1 | 0 |
| Case 79 | 19 | 37,455,903 | 37,835,658 | 1 | 1 | 2 | 0 |
| Case 79 | 19 | 37,837,587 | 38,230,743 | 1 | 0 | 1 | 0 |
| Case 79 | 19 | 38,231,008 | 40,519,935 | 1 | 1 | 2 | 0 |
| Case 79 | 19 | 40,520,457 | 40,636,400 | 1 | 0 | 1 | 0 |
| Case 79 | 19 | 40,637,615 | 41,333,251 | 1 | 1 | 2 | 0 |
| Case 79 | 19 | 41,333,284 | 41,386,033 | 0 | 0 | 0 | 0 |
| Case 79 | 19 | 41,392,885 | 44,348,824 | 1 | 1 | 2 | 0 |
| Case 79 | 19 | 44,348,919 | 44,510,341 | 1 | 0 | 1 | 0 |
| Case 79 | 19 | 44,511,223 | 52,379,835 | 1 | 1 | 2 | 0 |
| Case 79 | 19 | 52,380,624 | 52,658,547 | 1 | 0 | 1 | 0 |
| Case 79 | 19 | 52,659,362 | 52,772,880 | 1 | 1 | 2 | 0 |
| Case 79 | 19 | 52,788,289 | 53,464,639 | 1 | 0 | 1 | 0 |
| Case 79 | 19 | 53,465,008 | 53,571,306 | 1 | 1 | 2 | 0 |
| Case 79 | 19 | 53,571,679 | 53,746,938 | 1 | 0 | 1 | 0 |
| Case 79 | 19 | 53,747,000 | 54,722,700 | 1 | 1 | 2 | 0 |
| Case 79 | 19 | 54,731,679 | 54,749,011 | 4 | 0 | 4 | 1 |
| Case 79 | 19 | 54,753,543 | 58,101,681 | 1 | 1 | 2 | 0 |
| Case 79 | 19 | 58,101,790 | 58,491,627 | 1 | 0 | 1 | 0 |
| Case 79 | 19 | 58,494,665 | 59,097,160 | 1 | 1 | 2 | 0 |
| Case 79 | 20 | 63,244     | 26,293,985 | 1 | 1 | 2 | 0 |
| Case 79 | 20 | 29,425,357 | 62,948,788 | 1 | 1 | 2 | 0 |
| Case 79 | 21 | 10,827,533 | 10,971,337 | 1 | 1 | 2 | 0 |
| Case 79 | 21 | 14,368,320 | 48,100,155 | 1 | 1 | 2 | 0 |
| Case 79 | 22 | 16,114,244 | 51,195,728 | 1 | 1 | 2 | 0 |
| Case 80 | 1  | 82,154     | 1,196,471  | 5 | 0 | 5 | 1 |
| Case 80 | 1  | 1,197,591  | 1,197,591  | 3 | 0 | 3 | 1 |
| Case 80 | 1  | 1,201,632  | 1,322,667  | 6 | 0 | 6 | 1 |
| Case 80 | 1  | 1,322,735  | 1,322,765  | 4 | 0 | 4 | 1 |
| Case 80 | 1  | 1,322,868  | 1,664,124  | 5 | 0 | 5 | 1 |
| Case 80 | 1  | 1,680,219  | 1,776,269  | 4 | 0 | 4 | 1 |
| Case 80 | 1  | 1,781,220  | 2,038,732  | 3 | 0 | 3 | 1 |
| Case 80 | 1  | 2,040,898  | 5,154,882  | 4 | 0 | 4 | 1 |
| Case 80 | 1  | 5,156,245  | 5,732,473  | 5 | 0 | 5 | 1 |
| Case 80 | 1  | 5,736,682  | 6,822,235  | 4 | 0 | 4 | 1 |
| Case 80 | 1  | 6,826,467  | 7,368,829  | 5 | 0 | 5 | 1 |
| Case 80 | 1  | 7,372,804  | 8,074,872  | 4 | 0 | 4 | 1 |
| Case 80 | 1  | 8,075,618  | 9,030,959  | 5 | 0 | 5 | 1 |
| Case 80 | 1  | 9,030,964  | 11,982,544 | 4 | 0 | 4 | 1 |

|         |   |             |             |   |   |   |   |
|---------|---|-------------|-------------|---|---|---|---|
| Case 80 | 1 | 11,983,517  | 12,450,829  | 5 | 0 | 5 | 1 |
| Case 80 | 1 | 12,460,315  | 13,743,099  | 4 | 0 | 4 | 1 |
| Case 80 | 1 | 13,775,026  | 14,096,821  | 5 | 0 | 5 | 1 |
| Case 80 | 1 | 14,099,574  | 14,149,672  | 4 | 0 | 4 | 1 |
| Case 80 | 1 | 14,150,032  | 15,610,609  | 5 | 0 | 5 | 1 |
| Case 80 | 1 | 15,613,478  | 15,860,803  | 4 | 0 | 4 | 1 |
| Case 80 | 1 | 15,865,604  | 19,809,758  | 3 | 0 | 3 | 1 |
| Case 80 | 1 | 19,822,813  | 20,087,406  | 5 | 0 | 5 | 1 |
| Case 80 | 1 | 20,090,156  | 20,090,156  | 3 | 0 | 3 | 1 |
| Case 80 | 1 | 20,091,859  | 20,096,176  | 2 | 2 | 4 | 0 |
| Case 80 | 1 | 20,096,220  | 20,407,222  | 7 | 0 | 7 | 1 |
| Case 80 | 1 | 20,408,088  | 20,408,088  | 2 | 1 | 3 | 0 |
| Case 80 | 1 | 20,409,374  | 20,409,374  | 3 | 0 | 3 | 1 |
| Case 80 | 1 | 20,410,795  | 20,680,718  | 4 | 0 | 4 | 1 |
| Case 80 | 1 | 20,681,159  | 20,943,139  | 5 | 0 | 5 | 1 |
| Case 80 | 1 | 20,943,195  | 22,448,217  | 4 | 0 | 4 | 1 |
| Case 80 | 1 | 22,450,487  | 23,708,989  | 5 | 0 | 5 | 1 |
| Case 80 | 1 | 23,709,370  | 24,784,035  | 4 | 0 | 4 | 1 |
| Case 80 | 1 | 24,785,393  | 25,555,672  | 5 | 0 | 5 | 1 |
| Case 80 | 1 | 25,555,813  | 26,140,573  | 4 | 0 | 4 | 1 |
| Case 80 | 1 | 26,142,081  | 26,988,026  | 3 | 0 | 3 | 1 |
| Case 80 | 1 | 27,020,012  | 27,068,202  | 5 | 0 | 5 | 1 |
| Case 80 | 1 | 27,087,917  | 36,082,395  | 3 | 0 | 3 | 1 |
| Case 80 | 1 | 36,095,055  | 37,000,226  | 4 | 0 | 4 | 1 |
| Case 80 | 1 | 37,001,923  | 38,059,416  | 3 | 0 | 3 | 1 |
| Case 80 | 1 | 38,078,300  | 38,158,648  | 4 | 0 | 4 | 1 |
| Case 80 | 1 | 38,163,387  | 39,240,298  | 3 | 0 | 3 | 1 |
| Case 80 | 1 | 39,242,855  | 39,926,824  | 4 | 0 | 4 | 1 |
| Case 80 | 1 | 39,929,240  | 43,906,169  | 3 | 0 | 3 | 1 |
| Case 80 | 1 | 43,907,176  | 44,013,355  | 4 | 0 | 4 | 1 |
| Case 80 | 1 | 44,024,484  | 45,716,285  | 3 | 0 | 3 | 1 |
| Case 80 | 1 | 45,740,469  | 45,821,478  | 4 | 0 | 4 | 1 |
| Case 80 | 1 | 45,851,627  | 53,751,610  | 3 | 0 | 3 | 1 |
| Case 80 | 1 | 53,752,134  | 53,925,247  | 5 | 0 | 5 | 1 |
| Case 80 | 1 | 53,926,037  | 59,832,762  | 3 | 0 | 3 | 1 |
| Case 80 | 1 | 59,841,785  | 61,129,957  | 5 | 0 | 5 | 1 |
| Case 80 | 1 | 61,132,661  | 61,338,495  | 3 | 0 | 3 | 1 |
| Case 80 | 1 | 61,341,375  | 64,038,174  | 5 | 0 | 5 | 1 |
| Case 80 | 1 | 64,046,766  | 72,081,112  | 3 | 0 | 3 | 1 |
| Case 80 | 1 | 72,088,017  | 72,384,596  | 2 | 0 | 2 | 1 |
| Case 80 | 1 | 72,385,590  | 85,009,864  | 3 | 0 | 3 | 1 |
| Case 80 | 1 | 85,009,894  | 85,016,112  | 2 | 1 | 3 | 0 |
| Case 80 | 1 | 85,016,177  | 85,035,778  | 2 | 0 | 2 | 1 |
| Case 80 | 1 | 85,036,315  | 95,958,467  | 3 | 0 | 3 | 1 |
| Case 80 | 1 | 95,966,161  | 98,667,546  | 5 | 0 | 5 | 1 |
| Case 80 | 1 | 98,669,164  | 99,922,216  | 3 | 0 | 3 | 1 |
| Case 80 | 1 | 99,924,542  | 99,971,142  | 5 | 0 | 5 | 1 |
| Case 80 | 1 | 99,994,648  | 100,200,184 | 3 | 0 | 3 | 1 |
| Case 80 | 1 | 100,203,648 | 100,221,928 | 3 | 1 | 4 | 0 |
| Case 80 | 1 | 100,225,317 | 110,535,915 | 3 | 0 | 3 | 1 |
| Case 80 | 1 | 110,538,926 | 110,674,137 | 5 | 0 | 5 | 1 |
| Case 80 | 1 | 110,677,023 | 116,970,461 | 3 | 0 | 3 | 1 |
| Case 80 | 1 | 116,988,030 | 120,523,902 | 5 | 0 | 5 | 1 |
| Case 80 | 1 | 120,548,070 | 121,346,616 | 4 | 0 | 4 | 1 |
| Case 80 | 1 | 142,649,718 | 145,702,497 | 4 | 0 | 4 | 1 |
| Case 80 | 1 | 145,703,115 | 147,806,652 | 5 | 0 | 5 | 1 |
| Case 80 | 1 | 147,807,277 | 151,761,865 | 4 | 0 | 4 | 1 |
| Case 80 | 1 | 151,763,246 | 151,763,246 | 3 | 0 | 3 | 1 |
| Case 80 | 1 | 151,770,138 | 152,185,649 | 6 | 0 | 6 | 1 |
| Case 80 | 1 | 152,191,007 | 152,331,330 | 4 | 0 | 4 | 1 |
| Case 80 | 1 | 152,331,354 | 153,410,682 | 5 | 0 | 5 | 1 |

|         |   |             |             |   |   |   |   |
|---------|---|-------------|-------------|---|---|---|---|
| Case 80 | 1 | 153,410,751 | 154,811,420 | 4 | 0 | 4 | 1 |
| Case 80 | 1 | 154,811,435 | 155,105,882 | 5 | 0 | 5 | 1 |
| Case 80 | 1 | 155,106,227 | 155,106,227 | 3 | 0 | 3 | 1 |
| Case 80 | 1 | 155,106,446 | 155,255,837 | 6 | 0 | 6 | 1 |
| Case 80 | 1 | 155,257,018 | 155,993,456 | 4 | 0 | 4 | 1 |
| Case 80 | 1 | 155,995,080 | 156,228,816 | 5 | 0 | 5 | 1 |
| Case 80 | 1 | 156,230,304 | 157,094,802 | 4 | 0 | 4 | 1 |
| Case 80 | 1 | 157,095,470 | 157,514,685 | 5 | 0 | 5 | 1 |
| Case 80 | 1 | 157,516,802 | 157,596,949 | 4 | 0 | 4 | 1 |
| Case 80 | 1 | 157,605,501 | 158,389,900 | 5 | 0 | 5 | 1 |
| Case 80 | 1 | 158,389,993 | 158,725,345 | 4 | 0 | 4 | 1 |
| Case 80 | 1 | 158,725,348 | 159,748,745 | 5 | 0 | 5 | 1 |
| Case 80 | 1 | 159,749,188 | 161,723,013 | 4 | 0 | 4 | 1 |
| Case 80 | 1 | 161,726,654 | 162,008,079 | 5 | 0 | 5 | 1 |
| Case 80 | 1 | 162,010,787 | 168,443,178 | 4 | 0 | 4 | 1 |
| Case 80 | 1 | 168,445,500 | 169,363,203 | 5 | 0 | 5 | 1 |
| Case 80 | 1 | 169,366,494 | 192,845,807 | 4 | 0 | 4 | 1 |
| Case 80 | 1 | 192,880,701 | 193,181,196 | 2 | 0 | 2 | 1 |
| Case 80 | 1 | 193,193,597 | 201,354,891 | 4 | 0 | 4 | 1 |
| Case 80 | 1 | 201,355,522 | 201,689,201 | 5 | 0 | 5 | 1 |
| Case 80 | 1 | 201,692,871 | 201,983,055 | 4 | 0 | 4 | 1 |
| Case 80 | 1 | 201,983,242 | 201,983,242 | 3 | 0 | 3 | 1 |
| Case 80 | 1 | 201,986,418 | 202,122,956 | 6 | 0 | 6 | 1 |
| Case 80 | 1 | 202,124,711 | 206,967,152 | 4 | 0 | 4 | 1 |
| Case 80 | 1 | 206,968,893 | 207,188,207 | 6 | 0 | 6 | 1 |
| Case 80 | 1 | 207,189,574 | 207,190,293 | 4 | 0 | 4 | 1 |
| Case 80 | 1 | 207,191,164 | 207,211,388 | 6 | 1 | 7 | 0 |
| Case 80 | 1 | 207,217,359 | 225,776,831 | 4 | 0 | 4 | 1 |
| Case 80 | 1 | 225,792,814 | 226,053,660 | 5 | 0 | 5 | 1 |
| Case 80 | 1 | 226,054,333 | 226,305,741 | 4 | 0 | 4 | 1 |
| Case 80 | 1 | 226,313,525 | 226,567,298 | 5 | 0 | 5 | 1 |
| Case 80 | 1 | 226,567,661 | 234,908,088 | 4 | 0 | 4 | 1 |
| Case 80 | 1 | 234,909,298 | 235,577,905 | 5 | 0 | 5 | 1 |
| Case 80 | 1 | 235,582,810 | 249,218,992 | 4 | 0 | 4 | 1 |
| Case 80 | 2 | 18,674      | 2,667,339   | 2 | 1 | 3 | 0 |
| Case 80 | 2 | 2,670,178   | 2,777,618   | 2 | 2 | 4 | 0 |
| Case 80 | 2 | 2,778,016   | 3,651,953   | 2 | 1 | 3 | 0 |
| Case 80 | 2 | 3,652,023   | 3,905,982   | 2 | 2 | 4 | 0 |
| Case 80 | 2 | 3,909,150   | 5,893,301   | 2 | 1 | 3 | 0 |
| Case 80 | 2 | 5,896,537   | 6,204,508   | 2 | 2 | 4 | 0 |
| Case 80 | 2 | 6,214,229   | 6,550,266   | 2 | 1 | 3 | 0 |
| Case 80 | 2 | 6,551,857   | 6,606,787   | 3 | 1 | 4 | 0 |
| Case 80 | 2 | 6,611,401   | 6,937,310   | 2 | 1 | 3 | 0 |
| Case 80 | 2 | 6,937,593   | 7,036,621   | 2 | 2 | 4 | 0 |
| Case 80 | 2 | 7,036,678   | 7,320,746   | 2 | 1 | 3 | 0 |
| Case 80 | 2 | 7,322,437   | 7,523,858   | 2 | 2 | 4 | 0 |
| Case 80 | 2 | 7,525,664   | 8,099,581   | 2 | 1 | 3 | 0 |
| Case 80 | 2 | 8,100,477   | 8,654,581   | 2 | 2 | 4 | 0 |
| Case 80 | 2 | 8,657,302   | 9,165,288   | 2 | 1 | 3 | 0 |
| Case 80 | 2 | 9,185,559   | 9,914,751   | 3 | 1 | 4 | 0 |
| Case 80 | 2 | 9,922,283   | 10,126,416  | 4 | 1 | 5 | 0 |
| Case 80 | 2 | 10,131,122  | 10,310,957  | 2 | 2 | 4 | 0 |
| Case 80 | 2 | 10,312,826  | 10,451,165  | 4 | 1 | 5 | 0 |
| Case 80 | 2 | 10,453,849  | 10,512,382  | 2 | 2 | 4 | 0 |
| Case 80 | 2 | 10,512,580  | 10,684,391  | 3 | 2 | 5 | 0 |
| Case 80 | 2 | 10,685,243  | 11,272,784  | 2 | 2 | 4 | 0 |
| Case 80 | 2 | 11,273,626  | 11,503,351  | 2 | 1 | 3 | 0 |
| Case 80 | 2 | 11,505,213  | 11,791,754  | 2 | 2 | 4 | 0 |
| Case 80 | 2 | 11,792,857  | 11,823,585  | 2 | 1 | 3 | 0 |
| Case 80 | 2 | 11,834,635  | 12,453,068  | 3 | 1 | 4 | 0 |
| Case 80 | 2 | 12,454,023  | 13,330,848  | 2 | 2 | 4 | 0 |

|         |   |             |             |   |   |   |   |
|---------|---|-------------|-------------|---|---|---|---|
| Case 80 | 2 | 13,333,326  | 15,720,031  | 2 | 1 | 3 | 0 |
| Case 80 | 2 | 15,722,380  | 16,123,173  | 2 | 2 | 4 | 0 |
| Case 80 | 2 | 16,128,823  | 16,527,624  | 3 | 2 | 5 | 0 |
| Case 80 | 2 | 16,531,549  | 16,943,918  | 3 | 1 | 4 | 0 |
| Case 80 | 2 | 16,944,727  | 17,963,098  | 2 | 1 | 3 | 0 |
| Case 80 | 2 | 17,963,109  | 17,973,438  | 2 | 2 | 4 | 0 |
| Case 80 | 2 | 17,975,091  | 18,247,962  | 3 | 2 | 5 | 0 |
| Case 80 | 2 | 18,260,937  | 18,653,880  | 5 | 2 | 7 | 0 |
| Case 80 | 2 | 18,664,806  | 19,184,996  | 3 | 2 | 5 | 0 |
| Case 80 | 2 | 19,226,545  | 19,311,718  | 5 | 2 | 7 | 0 |
| Case 80 | 2 | 19,317,936  | 19,546,795  | 3 | 2 | 5 | 0 |
| Case 80 | 2 | 19,549,981  | 19,549,981  | 2 | 2 | 4 | 0 |
| Case 80 | 2 | 19,550,625  | 20,599,304  | 4 | 2 | 6 | 0 |
| Case 80 | 2 | 20,600,312  | 28,046,028  | 3 | 2 | 5 | 0 |
| Case 80 | 2 | 28,050,468  | 28,901,313  | 2 | 2 | 4 | 0 |
| Case 80 | 2 | 28,902,004  | 29,446,701  | 2 | 1 | 3 | 0 |
| Case 80 | 2 | 29,447,108  | 30,082,600  | 2 | 2 | 4 | 0 |
| Case 80 | 2 | 30,086,291  | 30,418,294  | 2 | 1 | 3 | 0 |
| Case 80 | 2 | 30,421,533  | 30,636,263  | 3 | 1 | 4 | 0 |
| Case 80 | 2 | 30,636,916  | 30,951,486  | 2 | 1 | 3 | 0 |
| Case 80 | 2 | 30,951,919  | 31,758,781  | 2 | 2 | 4 | 0 |
| Case 80 | 2 | 31,758,787  | 32,613,882  | 2 | 1 | 3 | 0 |
| Case 80 | 2 | 32,621,143  | 32,689,829  | 2 | 0 | 2 | 1 |
| Case 80 | 2 | 32,689,838  | 32,918,720  | 3 | 0 | 3 | 1 |
| Case 80 | 2 | 32,922,558  | 33,430,110  | 2 | 2 | 4 | 0 |
| Case 80 | 2 | 33,447,092  | 35,129,304  | 2 | 1 | 3 | 0 |
| Case 80 | 2 | 35,130,378  | 35,584,461  | 4 | 2 | 6 | 0 |
| Case 80 | 2 | 35,591,234  | 36,017,688  | 2 | 1 | 3 | 0 |
| Case 80 | 2 | 36,019,937  | 36,122,388  | 2 | 2 | 4 | 0 |
| Case 80 | 2 | 36,123,261  | 41,559,590  | 3 | 2 | 5 | 0 |
| Case 80 | 2 | 41,623,189  | 42,180,912  | 3 | 3 | 6 | 0 |
| Case 80 | 2 | 42,182,063  | 42,211,659  | 4 | 3 | 7 | 0 |
| Case 80 | 2 | 42,214,495  | 42,214,495  | 2 | 2 | 4 | 0 |
| Case 80 | 2 | 42,227,952  | 42,468,471  | 4 | 2 | 6 | 0 |
| Case 80 | 2 | 42,470,794  | 43,086,466  | 3 | 2 | 5 | 0 |
| Case 80 | 2 | 43,091,100  | 43,321,742  | 4 | 2 | 6 | 0 |
| Case 80 | 2 | 43,330,109  | 47,184,447  | 3 | 2 | 5 | 0 |
| Case 80 | 2 | 47,187,393  | 47,217,094  | 5 | 2 | 7 | 0 |
| Case 80 | 2 | 47,220,285  | 47,426,010  | 3 | 2 | 5 | 0 |
| Case 80 | 2 | 47,431,143  | 47,629,898  | 5 | 2 | 7 | 0 |
| Case 80 | 2 | 47,630,353  | 61,729,395  | 3 | 2 | 5 | 0 |
| Case 80 | 2 | 61,731,478  | 61,944,755  | 5 | 2 | 7 | 0 |
| Case 80 | 2 | 61,945,590  | 64,400,608  | 3 | 2 | 5 | 0 |
| Case 80 | 2 | 64,401,060  | 64,402,689  | 2 | 2 | 4 | 0 |
| Case 80 | 2 | 64,407,710  | 64,769,481  | 4 | 2 | 6 | 0 |
| Case 80 | 2 | 64,772,146  | 77,745,815  | 3 | 2 | 5 | 0 |
| Case 80 | 2 | 77,745,866  | 77,746,839  | 2 | 2 | 4 | 0 |
| Case 80 | 2 | 77,747,669  | 78,937,122  | 4 | 2 | 6 | 0 |
| Case 80 | 2 | 78,945,755  | 79,055,423  | 3 | 2 | 5 | 0 |
| Case 80 | 2 | 79,056,092  | 79,641,996  | 5 | 2 | 7 | 0 |
| Case 80 | 2 | 79,643,276  | 92,081,640  | 3 | 2 | 5 | 0 |
| Case 80 | 2 | 95,429,424  | 96,541,695  | 3 | 2 | 5 | 0 |
| Case 80 | 2 | 96,560,303  | 96,966,788  | 2 | 2 | 4 | 0 |
| Case 80 | 2 | 96,981,369  | 97,398,813  | 3 | 2 | 5 | 0 |
| Case 80 | 2 | 97,399,339  | 109,473,379 | 2 | 2 | 4 | 0 |
| Case 80 | 2 | 109,489,976 | 109,652,644 | 3 | 2 | 5 | 0 |
| Case 80 | 2 | 109,662,043 | 113,542,960 | 2 | 2 | 4 | 0 |
| Case 80 | 2 | 113,544,007 | 113,590,467 | 3 | 2 | 5 | 0 |
| Case 80 | 2 | 113,591,275 | 117,495,809 | 2 | 2 | 4 | 0 |
| Case 80 | 2 | 117,516,618 | 117,737,432 | 3 | 0 | 3 | 1 |
| Case 80 | 2 | 117,744,591 | 121,948,307 | 2 | 2 | 4 | 0 |



|         |   |             |             |   |   |   |   |
|---------|---|-------------|-------------|---|---|---|---|
| Case 80 | 2 | 121,948,846 | 122,117,738 | 3 | 2 | 5 | 0 |
| Case 80 | 2 | 122,123,637 | 130,953,944 | 2 | 2 | 4 | 0 |
| Case 80 | 2 | 130,982,377 | 131,082,639 | 4 | 2 | 6 | 0 |
| Case 80 | 2 | 131,089,135 | 131,573,575 | 3 | 2 | 5 | 0 |
| Case 80 | 2 | 131,588,535 | 144,869,044 | 2 | 2 | 4 | 0 |
| Case 80 | 2 | 144,879,302 | 145,079,065 | 3 | 0 | 3 | 1 |
| Case 80 | 2 | 145,126,711 | 152,955,482 | 2 | 2 | 4 | 0 |
| Case 80 | 2 | 152,955,805 | 153,164,514 | 4 | 2 | 6 | 0 |
| Case 80 | 2 | 153,183,646 | 160,815,093 | 2 | 2 | 4 | 0 |
| Case 80 | 2 | 160,824,100 | 160,998,570 | 3 | 2 | 5 | 0 |
| Case 80 | 2 | 160,998,581 | 173,011,537 | 2 | 2 | 4 | 0 |
| Case 80 | 2 | 173,013,373 | 173,311,553 | 4 | 2 | 6 | 0 |
| Case 80 | 2 | 173,316,523 | 174,879,174 | 2 | 2 | 4 | 0 |
| Case 80 | 2 | 174,891,414 | 175,009,066 | 3 | 0 | 3 | 1 |
| Case 80 | 2 | 175,025,275 | 186,345,148 | 2 | 2 | 4 | 0 |
| Case 80 | 2 | 186,387,129 | 186,646,161 | 4 | 2 | 6 | 0 |
| Case 80 | 2 | 186,653,394 | 187,213,730 | 2 | 2 | 4 | 0 |
| Case 80 | 2 | 187,240,797 | 187,410,817 | 3 | 0 | 3 | 1 |
| Case 80 | 2 | 187,415,917 | 187,521,260 | 0 | 0 | 0 | 0 |
| Case 80 | 2 | 187,523,880 | 187,523,880 | 3 | 0 | 3 | 1 |
| Case 80 | 2 | 187,526,672 | 187,526,672 | 2 | 1 | 3 | 0 |
| Case 80 | 2 | 187,529,315 | 187,615,917 | 2 | 0 | 2 | 1 |
| Case 80 | 2 | 187,618,680 | 187,643,406 | 3 | 0 | 3 | 1 |
| Case 80 | 2 | 187,644,547 | 208,842,154 | 2 | 2 | 4 | 0 |
| Case 80 | 2 | 208,842,185 | 209,655,509 | 3 | 2 | 5 | 0 |
| Case 80 | 2 | 209,659,046 | 219,204,562 | 2 | 2 | 4 | 0 |
| Case 80 | 2 | 219,204,592 | 219,397,937 | 3 | 2 | 5 | 0 |
| Case 80 | 2 | 219,409,308 | 228,363,432 | 2 | 2 | 4 | 0 |
| Case 80 | 2 | 228,372,956 | 228,552,234 | 4 | 2 | 6 | 0 |
| Case 80 | 2 | 228,552,881 | 232,316,617 | 2 | 2 | 4 | 0 |
| Case 80 | 2 | 232,321,956 | 232,717,857 | 3 | 2 | 5 | 0 |
| Case 80 | 2 | 232,718,042 | 243,048,760 | 2 | 2 | 4 | 0 |
| Case 80 | 3 | 61,495      | 9,660,064   | 5 | 0 | 5 | 1 |
| Case 80 | 3 | 9,673,018   | 10,372,840  | 4 | 0 | 4 | 1 |
| Case 80 | 3 | 10,374,314  | 10,709,750  | 5 | 0 | 5 | 1 |
| Case 80 | 3 | 10,711,702  | 11,647,173  | 4 | 0 | 4 | 1 |
| Case 80 | 3 | 11,647,301  | 12,487,047  | 5 | 0 | 5 | 1 |
| Case 80 | 3 | 12,487,511  | 13,057,791  | 4 | 0 | 4 | 1 |
| Case 80 | 3 | 13,066,535  | 13,157,050  | 5 | 0 | 5 | 1 |
| Case 80 | 3 | 13,161,100  | 13,701,622  | 4 | 0 | 4 | 1 |
| Case 80 | 3 | 13,705,345  | 14,700,436  | 5 | 0 | 5 | 1 |
| Case 80 | 3 | 14,702,351  | 14,863,096  | 4 | 0 | 4 | 1 |
| Case 80 | 3 | 14,865,367  | 14,865,367  | 3 | 0 | 3 | 1 |
| Case 80 | 3 | 14,871,766  | 15,810,605  | 6 | 0 | 6 | 1 |
| Case 80 | 3 | 15,812,085  | 15,812,085  | 4 | 0 | 4 | 1 |
| Case 80 | 3 | 15,812,343  | 16,990,119  | 5 | 0 | 5 | 1 |
| Case 80 | 3 | 17,002,619  | 17,120,206  | 3 | 0 | 3 | 1 |
| Case 80 | 3 | 17,121,692  | 37,310,849  | 5 | 0 | 5 | 1 |
| Case 80 | 3 | 37,313,088  | 37,388,702  | 4 | 0 | 4 | 1 |
| Case 80 | 3 | 37,396,678  | 37,716,880  | 3 | 0 | 3 | 1 |
| Case 80 | 3 | 37,721,795  | 37,986,249  | 5 | 0 | 5 | 1 |
| Case 80 | 3 | 37,996,268  | 38,350,134  | 4 | 0 | 4 | 1 |
| Case 80 | 3 | 38,350,519  | 38,926,829  | 5 | 0 | 5 | 1 |
| Case 80 | 3 | 38,928,643  | 39,170,782  | 4 | 0 | 4 | 1 |
| Case 80 | 3 | 39,170,800  | 39,228,676  | 5 | 0 | 5 | 1 |
| Case 80 | 3 | 39,228,772  | 39,265,616  | 4 | 0 | 4 | 1 |
| Case 80 | 3 | 39,267,352  | 53,796,091  | 3 | 0 | 3 | 1 |
| Case 80 | 3 | 53,799,960  | 54,053,981  | 2 | 0 | 2 | 1 |
| Case 80 | 3 | 54,063,193  | 60,333,449  | 3 | 0 | 3 | 1 |
| Case 80 | 3 | 60,337,651  | 60,374,028  | 0 | 0 | 0 | 0 |
| Case 80 | 3 | 60,379,253  | 60,931,990  | 3 | 0 | 3 | 1 |

|         |   |             |             |   |   |   |   |
|---------|---|-------------|-------------|---|---|---|---|
| Case 80 | 3 | 60,933,934  | 61,205,924  | 0 | 0 | 0 | 0 |
| Case 80 | 3 | 61,211,945  | 85,661,265  | 3 | 0 | 3 | 1 |
| Case 80 | 3 | 85,663,849  | 88,992,369  | 3 | 1 | 4 | 0 |
| Case 80 | 3 | 88,993,275  | 90,442,925  | 3 | 2 | 5 | 0 |
| Case 80 | 3 | 93,537,290  | 109,178,758 | 3 | 2 | 5 | 0 |
| Case 80 | 3 | 109,182,586 | 109,182,586 | 3 | 0 | 3 | 1 |
| Case 80 | 3 | 109,195,046 | 109,591,203 | 4 | 0 | 4 | 1 |
| Case 80 | 3 | 109,604,806 | 109,618,919 | 4 | 2 | 6 | 0 |
| Case 80 | 3 | 109,621,818 | 112,992,140 | 3 | 2 | 5 | 0 |
| Case 80 | 3 | 112,993,063 | 113,179,485 | 2 | 2 | 4 | 0 |
| Case 80 | 3 | 113,179,497 | 119,606,078 | 3 | 2 | 5 | 0 |
| Case 80 | 3 | 119,610,793 | 120,123,739 | 3 | 3 | 6 | 0 |
| Case 80 | 3 | 120,123,818 | 124,826,403 | 3 | 2 | 5 | 0 |
| Case 80 | 3 | 124,826,408 | 174,225,345 | 3 | 1 | 4 | 0 |
| Case 80 | 3 | 174,231,077 | 174,486,282 | 4 | 1 | 5 | 0 |
| Case 80 | 3 | 174,494,183 | 174,540,381 | 2 | 2 | 4 | 0 |
| Case 80 | 3 | 174,563,022 | 174,596,166 | 2 | 1 | 3 | 0 |
| Case 80 | 3 | 174,608,936 | 174,757,260 | 2 | 0 | 2 | 1 |
| Case 80 | 3 | 174,764,910 | 174,951,784 | 3 | 0 | 3 | 1 |
| Case 80 | 3 | 174,961,387 | 175,128,075 | 3 | 1 | 4 | 0 |
| Case 80 | 3 | 175,134,330 | 175,403,905 | 2 | 1 | 3 | 0 |
| Case 80 | 3 | 175,410,177 | 176,980,658 | 3 | 1 | 4 | 0 |
| Case 80 | 3 | 176,981,307 | 177,990,186 | 3 | 2 | 5 | 0 |
| Case 80 | 3 | 178,007,676 | 178,107,949 | 3 | 0 | 3 | 1 |
| Case 80 | 3 | 178,118,625 | 178,571,997 | 3 | 2 | 5 | 0 |
| Case 80 | 3 | 178,575,038 | 180,359,874 | 2 | 2 | 4 | 0 |
| Case 80 | 3 | 180,364,961 | 182,597,321 | 3 | 2 | 5 | 0 |
| Case 80 | 3 | 182,602,594 | 184,223,392 | 2 | 2 | 4 | 0 |
| Case 80 | 3 | 184,223,454 | 184,339,757 | 3 | 2 | 5 | 0 |
| Case 80 | 3 | 184,343,037 | 187,992,608 | 2 | 2 | 4 | 0 |
| Case 80 | 3 | 187,995,491 | 188,114,458 | 4 | 2 | 6 | 0 |
| Case 80 | 3 | 188,114,589 | 192,937,401 | 3 | 2 | 5 | 0 |
| Case 80 | 3 | 192,948,186 | 193,415,750 | 2 | 2 | 4 | 0 |
| Case 80 | 3 | 193,417,179 | 193,724,534 | 4 | 2 | 6 | 0 |
| Case 80 | 3 | 193,728,370 | 197,712,759 | 2 | 2 | 4 | 0 |
| Case 80 | 3 | 197,724,348 | 197,838,262 | 4 | 2 | 6 | 0 |
| Case 80 | 4 | 71,566      | 517,639     | 3 | 0 | 3 | 1 |
| Case 80 | 4 | 517,686     | 681,778     | 2 | 1 | 3 | 0 |
| Case 80 | 4 | 681,940     | 944,210     | 2 | 2 | 4 | 0 |
| Case 80 | 4 | 944,249     | 1,988,103   | 2 | 1 | 3 | 0 |
| Case 80 | 4 | 1,988,193   | 2,306,739   | 2 | 0 | 2 | 1 |
| Case 80 | 4 | 2,306,871   | 2,451,467   | 3 | 0 | 3 | 1 |
| Case 80 | 4 | 2,451,694   | 3,514,695   | 2 | 1 | 3 | 0 |
| Case 80 | 4 | 3,514,715   | 3,711,721   | 2 | 2 | 4 | 0 |
| Case 80 | 4 | 3,712,082   | 4,249,300   | 2 | 1 | 3 | 0 |
| Case 80 | 4 | 4,249,620   | 5,641,753   | 2 | 2 | 4 | 0 |
| Case 80 | 4 | 5,642,161   | 5,865,088   | 2 | 1 | 3 | 0 |
| Case 80 | 4 | 5,865,361   | 6,575,960   | 2 | 2 | 4 | 0 |
| Case 80 | 4 | 6,577,023   | 7,172,750   | 2 | 1 | 3 | 0 |
| Case 80 | 4 | 7,172,827   | 7,426,937   | 2 | 2 | 4 | 0 |
| Case 80 | 4 | 7,427,899   | 7,463,304   | 2 | 1 | 3 | 0 |
| Case 80 | 4 | 7,465,277   | 7,738,369   | 2 | 2 | 4 | 0 |
| Case 80 | 4 | 7,738,730   | 9,849,528   | 2 | 1 | 3 | 0 |
| Case 80 | 4 | 9,859,976   | 12,108,239  | 2 | 2 | 4 | 0 |
| Case 80 | 4 | 12,138,827  | 12,633,072  | 2 | 1 | 3 | 0 |
| Case 80 | 4 | 12,634,511  | 13,874,388  | 2 | 2 | 4 | 0 |
| Case 80 | 4 | 13,874,500  | 13,904,166  | 3 | 0 | 3 | 1 |
| Case 80 | 4 | 13,904,303  | 14,962,496  | 3 | 1 | 4 | 0 |
| Case 80 | 4 | 14,972,561  | 15,096,523  | 3 | 0 | 3 | 1 |
| Case 80 | 4 | 15,101,916  | 15,259,423  | 3 | 1 | 4 | 0 |
| Case 80 | 4 | 15,262,507  | 15,716,923  | 2 | 1 | 3 | 0 |

|         |   |             |             |   |   |   |   |
|---------|---|-------------|-------------|---|---|---|---|
| Case 80 | 4 | 15,717,321  | 16,135,475  | 2 | 2 | 4 | 0 |
| Case 80 | 4 | 16,138,165  | 16,510,235  | 3 | 1 | 4 | 0 |
| Case 80 | 4 | 16,511,887  | 17,816,572  | 2 | 2 | 4 | 0 |
| Case 80 | 4 | 17,816,950  | 17,910,840  | 2 | 1 | 3 | 0 |
| Case 80 | 4 | 17,919,811  | 19,047,617  | 2 | 2 | 4 | 0 |
| Case 80 | 4 | 19,056,475  | 19,609,939  | 2 | 1 | 3 | 0 |
| Case 80 | 4 | 19,616,531  | 19,821,565  | 3 | 0 | 3 | 1 |
| Case 80 | 4 | 19,827,258  | 20,289,373  | 2 | 2 | 4 | 0 |
| Case 80 | 4 | 20,292,239  | 21,286,777  | 2 | 1 | 3 | 0 |
| Case 80 | 4 | 21,292,213  | 25,119,575  | 2 | 2 | 4 | 0 |
| Case 80 | 4 | 25,123,344  | 25,394,785  | 2 | 1 | 3 | 0 |
| Case 80 | 4 | 25,397,459  | 26,585,881  | 2 | 2 | 4 | 0 |
| Case 80 | 4 | 26,591,253  | 27,019,452  | 2 | 1 | 3 | 0 |
| Case 80 | 4 | 27,019,456  | 27,601,868  | 2 | 2 | 4 | 0 |
| Case 80 | 4 | 27,602,132  | 35,727,026  | 2 | 1 | 3 | 0 |
| Case 80 | 4 | 35,731,201  | 35,904,938  | 3 | 1 | 4 | 0 |
| Case 80 | 4 | 35,908,009  | 36,230,585  | 2 | 1 | 3 | 0 |
| Case 80 | 4 | 36,230,607  | 36,447,541  | 3 | 1 | 4 | 0 |
| Case 80 | 4 | 36,449,901  | 36,583,469  | 3 | 0 | 3 | 1 |
| Case 80 | 4 | 36,597,275  | 37,235,854  | 3 | 1 | 4 | 0 |
| Case 80 | 4 | 37,238,325  | 37,272,433  | 3 | 2 | 5 | 0 |
| Case 80 | 4 | 37,285,195  | 37,854,182  | 2 | 2 | 4 | 0 |
| Case 80 | 4 | 37,856,777  | 37,868,667  | 2 | 1 | 3 | 0 |
| Case 80 | 4 | 37,868,805  | 37,999,876  | 3 | 1 | 4 | 0 |
| Case 80 | 4 | 38,006,686  | 38,376,012  | 5 | 1 | 6 | 0 |
| Case 80 | 4 | 38,376,515  | 38,413,846  | 4 | 2 | 6 | 0 |
| Case 80 | 4 | 38,419,597  | 40,190,463  | 2 | 1 | 3 | 0 |
| Case 80 | 4 | 40,194,572  | 40,221,675  | 2 | 2 | 4 | 0 |
| Case 80 | 4 | 40,222,303  | 43,440,641  | 2 | 1 | 3 | 0 |
| Case 80 | 4 | 43,442,648  | 43,502,330  | 2 | 0 | 2 | 1 |
| Case 80 | 4 | 43,520,590  | 43,900,285  | 3 | 0 | 3 | 1 |
| Case 80 | 4 | 43,900,434  | 49,620,898  | 2 | 1 | 3 | 0 |
| Case 80 | 4 | 52,697,856  | 57,489,378  | 2 | 1 | 3 | 0 |
| Case 80 | 4 | 57,498,446  | 57,621,843  | 3 | 1 | 4 | 0 |
| Case 80 | 4 | 57,624,037  | 63,482,692  | 2 | 1 | 3 | 0 |
| Case 80 | 4 | 63,487,723  | 63,661,150  | 2 | 0 | 2 | 1 |
| Case 80 | 4 | 63,667,799  | 63,689,854  | 4 | 0 | 4 | 1 |
| Case 80 | 4 | 63,701,231  | 64,693,032  | 1 | 1 | 2 | 0 |
| Case 80 | 4 | 64,719,180  | 65,170,892  | 3 | 0 | 3 | 1 |
| Case 80 | 4 | 65,180,381  | 74,737,930  | 2 | 1 | 3 | 0 |
| Case 80 | 4 | 74,748,288  | 74,846,877  | 3 | 1 | 4 | 0 |
| Case 80 | 4 | 74,847,598  | 86,414,621  | 2 | 1 | 3 | 0 |
| Case 80 | 4 | 86,420,622  | 88,424,737  | 3 | 0 | 3 | 1 |
| Case 80 | 4 | 88,429,759  | 91,772,546  | 2 | 1 | 3 | 0 |
| Case 80 | 4 | 91,775,333  | 91,806,782  | 3 | 0 | 3 | 1 |
| Case 80 | 4 | 91,816,783  | 92,025,683  | 1 | 0 | 1 | 0 |
| Case 80 | 4 | 92,028,168  | 92,028,969  | 3 | 0 | 3 | 1 |
| Case 80 | 4 | 92,036,269  | 93,136,797  | 2 | 1 | 3 | 0 |
| Case 80 | 4 | 93,146,144  | 94,882,341  | 3 | 0 | 3 | 1 |
| Case 80 | 4 | 94,883,373  | 99,392,101  | 2 | 1 | 3 | 0 |
| Case 80 | 4 | 99,399,748  | 99,551,907  | 2 | 2 | 4 | 0 |
| Case 80 | 4 | 99,555,740  | 100,571,001 | 3 | 0 | 3 | 1 |
| Case 80 | 4 | 100,580,702 | 106,216,205 | 2 | 1 | 3 | 0 |
| Case 80 | 4 | 106,235,012 | 106,338,490 | 2 | 0 | 2 | 1 |
| Case 80 | 4 | 106,346,206 | 107,157,623 | 3 | 0 | 3 | 1 |
| Case 80 | 4 | 107,157,935 | 107,268,949 | 1 | 0 | 1 | 0 |
| Case 80 | 4 | 107,279,386 | 107,517,238 | 3 | 0 | 3 | 1 |
| Case 80 | 4 | 107,520,859 | 120,776,279 | 2 | 1 | 3 | 0 |
| Case 80 | 4 | 120,784,320 | 121,282,335 | 3 | 0 | 3 | 1 |
| Case 80 | 4 | 121,292,818 | 121,709,930 | 2 | 1 | 3 | 0 |
| Case 80 | 4 | 121,714,045 | 121,972,352 | 3 | 0 | 3 | 1 |

|         |   |             |             |   |   |   |   |
|---------|---|-------------|-------------|---|---|---|---|
| Case 80 | 4 | 121,974,645 | 126,039,335 | 2 | 1 | 3 | 0 |
| Case 80 | 4 | 126,053,047 | 126,337,736 | 3 | 0 | 3 | 1 |
| Case 80 | 4 | 126,337,744 | 130,474,564 | 2 | 1 | 3 | 0 |
| Case 80 | 4 | 130,476,563 | 130,580,317 | 3 | 0 | 3 | 1 |
| Case 80 | 4 | 130,588,996 | 152,992,266 | 2 | 1 | 3 | 0 |
| Case 80 | 4 | 152,994,226 | 153,658,324 | 2 | 0 | 2 | 1 |
| Case 80 | 4 | 153,658,895 | 153,658,895 | 3 | 0 | 3 | 1 |
| Case 80 | 4 | 153,660,407 | 153,696,635 | 1 | 0 | 1 | 0 |
| Case 80 | 4 | 153,701,130 | 153,703,306 | 3 | 0 | 3 | 1 |
| Case 80 | 4 | 153,714,157 | 153,829,996 | 1 | 0 | 1 | 0 |
| Case 80 | 4 | 153,831,260 | 153,863,430 | 3 | 0 | 3 | 1 |
| Case 80 | 4 | 153,864,319 | 153,864,319 | 2 | 1 | 3 | 0 |
| Case 80 | 4 | 153,864,333 | 156,261,667 | 2 | 0 | 2 | 1 |
| Case 80 | 4 | 156,264,133 | 156,264,133 | 3 | 0 | 3 | 1 |
| Case 80 | 4 | 156,265,409 | 156,297,060 | 1 | 0 | 1 | 0 |
| Case 80 | 4 | 156,299,620 | 156,299,620 | 3 | 0 | 3 | 1 |
| Case 80 | 4 | 156,300,040 | 156,300,040 | 2 | 1 | 3 | 0 |
| Case 80 | 4 | 156,311,396 | 160,836,194 | 2 | 0 | 2 | 1 |
| Case 80 | 4 | 160,840,630 | 160,840,630 | 3 | 0 | 3 | 1 |
| Case 80 | 4 | 160,857,395 | 161,363,563 | 1 | 0 | 1 | 0 |
| Case 80 | 4 | 161,365,143 | 161,365,143 | 3 | 0 | 3 | 1 |
| Case 80 | 4 | 161,366,230 | 161,366,230 | 2 | 1 | 3 | 0 |
| Case 80 | 4 | 161,366,623 | 162,307,000 | 2 | 0 | 2 | 1 |
| Case 80 | 4 | 162,307,028 | 162,320,903 | 3 | 0 | 3 | 1 |
| Case 80 | 4 | 162,321,420 | 162,477,082 | 1 | 0 | 1 | 0 |
| Case 80 | 4 | 162,482,595 | 162,516,553 | 3 | 0 | 3 | 1 |
| Case 80 | 4 | 162,521,710 | 162,923,324 | 1 | 0 | 1 | 0 |
| Case 80 | 4 | 162,925,724 | 162,925,724 | 3 | 0 | 3 | 1 |
| Case 80 | 4 | 162,927,440 | 162,927,440 | 4 | 0 | 4 | 1 |
| Case 80 | 4 | 162,930,214 | 170,322,819 | 2 | 0 | 2 | 1 |
| Case 80 | 4 | 170,338,453 | 170,338,453 | 3 | 0 | 3 | 1 |
| Case 80 | 4 | 170,345,879 | 170,448,464 | 1 | 0 | 1 | 0 |
| Case 80 | 4 | 170,451,435 | 170,451,435 | 3 | 0 | 3 | 1 |
| Case 80 | 4 | 170,452,770 | 170,452,770 | 2 | 1 | 3 | 0 |
| Case 80 | 4 | 170,459,044 | 172,352,348 | 2 | 0 | 2 | 1 |
| Case 80 | 4 | 172,354,182 | 172,367,540 | 3 | 0 | 3 | 1 |
| Case 80 | 4 | 172,373,388 | 173,543,874 | 1 | 0 | 1 | 0 |
| Case 80 | 4 | 173,562,564 | 173,562,564 | 3 | 0 | 3 | 1 |
| Case 80 | 4 | 173,585,910 | 173,585,910 | 2 | 1 | 3 | 0 |
| Case 80 | 4 | 173,597,016 | 179,409,526 | 2 | 0 | 2 | 1 |
| Case 80 | 4 | 179,410,247 | 179,410,247 | 3 | 0 | 3 | 1 |
| Case 80 | 4 | 179,410,273 | 179,894,901 | 1 | 0 | 1 | 0 |
| Case 80 | 4 | 179,896,707 | 179,896,707 | 3 | 0 | 3 | 1 |
| Case 80 | 4 | 179,899,458 | 179,899,458 | 2 | 1 | 3 | 0 |
| Case 80 | 4 | 179,899,843 | 185,532,342 | 2 | 0 | 2 | 1 |
| Case 80 | 4 | 185,533,691 | 185,533,691 | 3 | 0 | 3 | 1 |
| Case 80 | 4 | 185,543,672 | 185,638,307 | 1 | 0 | 1 | 0 |
| Case 80 | 4 | 185,639,169 | 185,639,169 | 3 | 0 | 3 | 1 |
| Case 80 | 4 | 185,650,152 | 185,650,152 | 2 | 1 | 3 | 0 |
| Case 80 | 4 | 185,650,154 | 186,353,670 | 2 | 0 | 2 | 1 |
| Case 80 | 4 | 186,357,255 | 186,381,382 | 1 | 0 | 1 | 0 |
| Case 80 | 4 | 186,381,392 | 186,382,206 | 3 | 0 | 3 | 1 |
| Case 80 | 4 | 186,382,219 | 186,382,219 | 2 | 1 | 3 | 0 |
| Case 80 | 4 | 186,382,253 | 187,539,125 | 2 | 0 | 2 | 1 |
| Case 80 | 4 | 187,539,205 | 187,540,442 | 3 | 0 | 3 | 1 |
| Case 80 | 4 | 187,540,589 | 187,542,316 | 2 | 1 | 3 | 0 |
| Case 80 | 4 | 187,542,380 | 190,872,778 | 2 | 0 | 2 | 1 |
| Case 80 | 4 | 190,876,192 | 190,883,077 | 3 | 0 | 3 | 1 |
| Case 80 | 4 | 190,903,682 | 190,963,766 | 2 | 1 | 3 | 0 |
| Case 80 | 5 | 38,139      | 488,590     | 2 | 2 | 4 | 0 |
| Case 80 | 5 | 490,237     | 685,748     | 3 | 2 | 5 | 0 |

|         |   |             |             |   |   |   |   |
|---------|---|-------------|-------------|---|---|---|---|
| Case 80 | 5 | 730,271     | 12,407,352  | 2 | 2 | 4 | 0 |
| Case 80 | 5 | 12,437,894  | 12,766,945  | 3 | 0 | 3 | 1 |
| Case 80 | 5 | 12,772,609  | 39,583,375  | 2 | 2 | 4 | 0 |
| Case 80 | 5 | 39,588,084  | 39,924,922  | 3 | 2 | 5 | 0 |
| Case 80 | 5 | 39,929,770  | 43,290,700  | 2 | 2 | 4 | 0 |
| Case 80 | 5 | 43,291,532  | 43,382,029  | 4 | 2 | 6 | 0 |
| Case 80 | 5 | 43,388,500  | 43,446,640  | 3 | 0 | 3 | 1 |
| Case 80 | 5 | 43,446,643  | 46,399,093  | 2 | 2 | 4 | 0 |
| Case 80 | 5 | 49,457,282  | 51,405,600  | 2 | 2 | 4 | 0 |
| Case 80 | 5 | 51,412,949  | 52,160,871  | 3 | 2 | 5 | 0 |
| Case 80 | 5 | 52,160,892  | 54,618,286  | 2 | 2 | 4 | 0 |
| Case 80 | 5 | 54,635,872  | 54,771,129  | 2 | 1 | 3 | 0 |
| Case 80 | 5 | 54,774,169  | 57,430,832  | 2 | 2 | 4 | 0 |
| Case 80 | 5 | 57,431,053  | 57,868,045  | 3 | 2 | 5 | 0 |
| Case 80 | 5 | 57,878,858  | 58,271,696  | 2 | 2 | 4 | 0 |
| Case 80 | 5 | 58,284,208  | 58,778,414  | 3 | 0 | 3 | 1 |
| Case 80 | 5 | 58,782,840  | 59,655,640  | 0 | 0 | 0 | 0 |
| Case 80 | 5 | 59,657,695  | 59,895,032  | 3 | 0 | 3 | 1 |
| Case 80 | 5 | 59,926,911  | 64,417,806  | 2 | 2 | 4 | 0 |
| Case 80 | 5 | 64,422,082  | 64,725,524  | 3 | 2 | 5 | 0 |
| Case 80 | 5 | 64,729,075  | 72,318,245  | 2 | 2 | 4 | 0 |
| Case 80 | 5 | 72,333,005  | 72,333,005  | 3 | 2 | 5 | 0 |
| Case 80 | 5 | 72,334,678  | 72,407,538  | 4 | 2 | 6 | 0 |
| Case 80 | 5 | 72,408,246  | 72,660,100  | 3 | 2 | 5 | 0 |
| Case 80 | 5 | 72,660,173  | 77,458,150  | 2 | 2 | 4 | 0 |
| Case 80 | 5 | 77,461,466  | 85,251,243  | 3 | 0 | 3 | 1 |
| Case 80 | 5 | 85,260,207  | 85,396,128  | 5 | 0 | 5 | 1 |
| Case 80 | 5 | 85,411,181  | 98,139,720  | 3 | 0 | 3 | 1 |
| Case 80 | 5 | 98,190,612  | 98,537,121  | 5 | 0 | 5 | 1 |
| Case 80 | 5 | 98,552,184  | 102,985,590 | 3 | 0 | 3 | 1 |
| Case 80 | 5 | 102,985,840 | 103,071,134 | 3 | 1 | 4 | 0 |
| Case 80 | 5 | 103,071,415 | 106,925,966 | 3 | 0 | 3 | 1 |
| Case 80 | 5 | 106,931,599 | 107,024,658 | 0 | 0 | 0 | 0 |
| Case 80 | 5 | 107,032,339 | 110,021,869 | 3 | 0 | 3 | 1 |
| Case 80 | 5 | 110,035,756 | 110,070,759 | 0 | 0 | 0 | 0 |
| Case 80 | 5 | 110,074,872 | 114,577,256 | 3 | 0 | 3 | 1 |
| Case 80 | 5 | 114,580,652 | 114,989,990 | 6 | 0 | 6 | 1 |
| Case 80 | 5 | 114,994,084 | 126,253,850 | 3 | 0 | 3 | 1 |
| Case 80 | 5 | 126,267,351 | 126,282,246 | 1 | 0 | 1 | 0 |
| Case 80 | 5 | 126,307,610 | 127,031,523 | 3 | 0 | 3 | 1 |
| Case 80 | 5 | 127,062,190 | 127,357,526 | 5 | 0 | 5 | 1 |
| Case 80 | 5 | 127,362,543 | 131,770,805 | 3 | 0 | 3 | 1 |
| Case 80 | 5 | 131,778,413 | 131,847,892 | 0 | 0 | 0 | 0 |
| Case 80 | 5 | 131,862,977 | 139,931,384 | 3 | 0 | 3 | 1 |
| Case 80 | 5 | 139,931,607 | 139,931,652 | 1 | 0 | 1 | 0 |
| Case 80 | 5 | 139,931,653 | 140,214,107 | 3 | 0 | 3 | 1 |
| Case 80 | 5 | 140,214,995 | 140,215,833 | 1 | 0 | 1 | 0 |
| Case 80 | 5 | 140,215,892 | 140,221,472 | 0 | 0 | 0 | 0 |
| Case 80 | 5 | 140,222,461 | 140,553,664 | 3 | 0 | 3 | 1 |
| Case 80 | 5 | 140,554,769 | 140,558,618 | 5 | 0 | 5 | 1 |
| Case 80 | 5 | 140,559,849 | 162,896,759 | 3 | 0 | 3 | 1 |
| Case 80 | 5 | 162,896,779 | 162,900,426 | 2 | 1 | 3 | 0 |
| Case 80 | 5 | 162,900,493 | 162,941,739 | 2 | 0 | 2 | 1 |
| Case 80 | 5 | 162,944,408 | 166,268,258 | 3 | 0 | 3 | 1 |
| Case 80 | 5 | 166,269,027 | 173,782,331 | 4 | 0 | 4 | 1 |
| Case 80 | 5 | 173,788,582 | 173,788,582 | 3 | 0 | 3 | 1 |
| Case 80 | 5 | 173,791,376 | 173,891,894 | 6 | 0 | 6 | 1 |
| Case 80 | 5 | 173,901,938 | 174,036,233 | 4 | 2 | 6 | 0 |
| Case 80 | 5 | 174,038,768 | 180,693,127 | 4 | 0 | 4 | 1 |
| Case 80 | 6 | 108,666     | 577,820     | 5 | 0 | 5 | 1 |
| Case 80 | 6 | 580,362     | 2,028,237   | 6 | 0 | 6 | 1 |

|         |   |             |             |   |   |   |   |
|---------|---|-------------|-------------|---|---|---|---|
| Case 80 | 6 | 2,032,259   | 2,039,027   | 3 | 0 | 3 | 1 |
| Case 80 | 6 | 2,048,584   | 2,097,686   | 0 | 0 | 0 | 0 |
| Case 80 | 6 | 2,106,309   | 13,060,568  | 3 | 0 | 3 | 1 |
| Case 80 | 6 | 13,064,501  | 13,321,097  | 0 | 0 | 0 | 0 |
| Case 80 | 6 | 13,321,279  | 13,321,279  | 3 | 0 | 3 | 1 |
| Case 80 | 6 | 13,321,280  | 13,332,467  | 1 | 0 | 1 | 0 |
| Case 80 | 6 | 13,336,815  | 30,471,520  | 3 | 0 | 3 | 1 |
| Case 80 | 6 | 30,475,415  | 30,537,853  | 4 | 0 | 4 | 1 |
| Case 80 | 6 | 30,539,205  | 30,624,880  | 5 | 0 | 5 | 1 |
| Case 80 | 6 | 30,625,155  | 30,625,155  | 3 | 0 | 3 | 1 |
| Case 80 | 6 | 30,626,614  | 30,840,688  | 6 | 0 | 6 | 1 |
| Case 80 | 6 | 30,840,950  | 30,840,950  | 4 | 0 | 4 | 1 |
| Case 80 | 6 | 30,841,996  | 31,080,009  | 5 | 0 | 5 | 1 |
| Case 80 | 6 | 31,080,016  | 31,172,151  | 4 | 0 | 4 | 1 |
| Case 80 | 6 | 31,173,096  | 32,109,431  | 5 | 0 | 5 | 1 |
| Case 80 | 6 | 32,109,979  | 32,389,305  | 4 | 0 | 4 | 1 |
| Case 80 | 6 | 32,389,648  | 32,401,845  | 3 | 0 | 3 | 1 |
| Case 80 | 6 | 32,402,464  | 43,310,590  | 4 | 0 | 4 | 1 |
| Case 80 | 6 | 43,316,130  | 43,411,906  | 5 | 0 | 5 | 1 |
| Case 80 | 6 | 43,411,992  | 44,020,410  | 4 | 0 | 4 | 1 |
| Case 80 | 6 | 44,021,286  | 44,390,518  | 5 | 0 | 5 | 1 |
| Case 80 | 6 | 44,397,465  | 56,193,637  | 4 | 0 | 4 | 1 |
| Case 80 | 6 | 56,202,104  | 56,345,337  | 5 | 0 | 5 | 1 |
| Case 80 | 6 | 56,346,870  | 58,752,089  | 4 | 0 | 4 | 1 |
| Case 80 | 6 | 61,891,118  | 66,077,188  | 4 | 0 | 4 | 1 |
| Case 80 | 6 | 66,083,394  | 66,267,533  | 3 | 0 | 3 | 1 |
| Case 80 | 6 | 66,269,399  | 89,737,774  | 4 | 0 | 4 | 1 |
| Case 80 | 6 | 89,739,221  | 91,345,657  | 3 | 1 | 4 | 0 |
| Case 80 | 6 | 91,349,828  | 93,628,360  | 4 | 1 | 5 | 0 |
| Case 80 | 6 | 93,629,457  | 93,765,656  | 3 | 1 | 4 | 0 |
| Case 80 | 6 | 93,781,036  | 99,195,548  | 5 | 1 | 6 | 0 |
| Case 80 | 6 | 99,203,222  | 99,214,884  | 4 | 0 | 4 | 1 |
| Case 80 | 6 | 99,218,958  | 99,374,760  | 5 | 0 | 5 | 1 |
| Case 80 | 6 | 99,374,761  | 99,374,801  | 4 | 0 | 4 | 1 |
| Case 80 | 6 | 99,431,200  | 101,296,389 | 5 | 1 | 6 | 0 |
| Case 80 | 6 | 101,296,420 | 101,344,511 | 4 | 0 | 4 | 1 |
| Case 80 | 6 | 101,351,390 | 101,495,639 | 5 | 0 | 5 | 1 |
| Case 80 | 6 | 101,507,345 | 101,508,921 | 4 | 0 | 4 | 1 |
| Case 80 | 6 | 101,540,875 | 101,761,752 | 3 | 1 | 4 | 0 |
| Case 80 | 6 | 101,791,813 | 101,906,652 | 5 | 1 | 6 | 0 |
| Case 80 | 6 | 101,913,238 | 101,916,765 | 4 | 0 | 4 | 1 |
| Case 80 | 6 | 101,927,338 | 102,066,487 | 2 | 0 | 2 | 1 |
| Case 80 | 6 | 102,077,056 | 102,077,056 | 4 | 0 | 4 | 1 |
| Case 80 | 6 | 102,111,184 | 102,639,153 | 5 | 1 | 6 | 0 |
| Case 80 | 6 | 102,642,021 | 102,670,220 | 4 | 0 | 4 | 1 |
| Case 80 | 6 | 102,674,605 | 102,748,329 | 3 | 1 | 4 | 0 |
| Case 80 | 6 | 102,766,711 | 108,127,875 | 5 | 1 | 6 | 0 |
| Case 80 | 6 | 108,131,849 | 108,139,570 | 4 | 0 | 4 | 1 |
| Case 80 | 6 | 108,140,137 | 109,148,861 | 6 | 1 | 7 | 0 |
| Case 80 | 6 | 109,169,164 | 109,190,094 | 4 | 0 | 4 | 1 |
| Case 80 | 6 | 109,190,126 | 135,307,258 | 5 | 1 | 6 | 0 |
| Case 80 | 6 | 135,307,309 | 135,315,398 | 4 | 2 | 6 | 0 |
| Case 80 | 6 | 135,315,570 | 135,334,600 | 3 | 2 | 5 | 0 |
| Case 80 | 6 | 135,349,756 | 136,559,847 | 5 | 2 | 7 | 0 |
| Case 80 | 6 | 136,560,616 | 136,596,488 | 3 | 2 | 5 | 0 |
| Case 80 | 6 | 136,597,117 | 136,599,912 | 2 | 2 | 4 | 0 |
| Case 80 | 6 | 136,612,111 | 137,848,642 | 4 | 2 | 6 | 0 |
| Case 80 | 6 | 137,850,196 | 137,891,497 | 3 | 3 | 6 | 0 |
| Case 80 | 6 | 137,893,893 | 138,642,307 | 4 | 3 | 7 | 0 |
| Case 80 | 6 | 138,644,833 | 138,644,833 | 2 | 2 | 4 | 0 |
| Case 80 | 6 | 138,655,028 | 140,182,546 | 4 | 2 | 6 | 0 |

|         |   |             |             |   |   |   |   |
|---------|---|-------------|-------------|---|---|---|---|
| Case 80 | 6 | 140,183,615 | 140,183,693 | 3 | 2 | 5 | 0 |
| Case 80 | 6 | 140,190,858 | 142,969,334 | 5 | 2 | 7 | 0 |
| Case 80 | 6 | 142,969,570 | 142,969,570 | 3 | 2 | 5 | 0 |
| Case 80 | 6 | 142,972,752 | 142,972,752 | 2 | 2 | 4 | 0 |
| Case 80 | 6 | 142,973,369 | 145,161,932 | 4 | 2 | 6 | 0 |
| Case 80 | 6 | 145,161,969 | 145,162,225 | 3 | 2 | 5 | 0 |
| Case 80 | 6 | 145,162,404 | 145,635,335 | 5 | 2 | 7 | 0 |
| Case 80 | 6 | 145,640,198 | 145,640,198 | 3 | 2 | 5 | 0 |
| Case 80 | 6 | 145,648,326 | 146,870,930 | 3 | 3 | 6 | 0 |
| Case 80 | 6 | 146,872,685 | 146,872,685 | 3 | 2 | 5 | 0 |
| Case 80 | 6 | 146,873,614 | 148,229,629 | 5 | 2 | 7 | 0 |
| Case 80 | 6 | 148,235,498 | 151,126,585 | 4 | 2 | 6 | 0 |
| Case 80 | 6 | 151,128,492 | 151,289,442 | 3 | 2 | 5 | 0 |
| Case 80 | 6 | 151,294,238 | 151,294,238 | 2 | 2 | 4 | 0 |
| Case 80 | 6 | 151,300,056 | 151,660,477 | 4 | 2 | 6 | 0 |
| Case 80 | 6 | 151,663,289 | 151,674,593 | 3 | 2 | 5 | 0 |
| Case 80 | 6 | 151,674,775 | 151,674,887 | 2 | 2 | 4 | 0 |
| Case 80 | 6 | 151,677,358 | 153,348,742 | 4 | 2 | 6 | 0 |
| Case 80 | 6 | 153,349,379 | 154,025,836 | 5 | 2 | 7 | 0 |
| Case 80 | 6 | 154,033,449 | 160,240,303 | 3 | 2 | 5 | 0 |
| Case 80 | 6 | 160,240,368 | 160,469,149 | 4 | 2 | 6 | 0 |
| Case 80 | 6 | 160,469,475 | 161,929,039 | 3 | 2 | 5 | 0 |
| Case 80 | 6 | 161,933,935 | 161,933,935 | 3 | 0 | 3 | 1 |
| Case 80 | 6 | 161,935,166 | 161,963,415 | 4 | 0 | 4 | 1 |
| Case 80 | 6 | 161,963,892 | 161,972,186 | 3 | 0 | 3 | 1 |
| Case 80 | 6 | 161,972,770 | 162,144,016 | 3 | 2 | 5 | 0 |
| Case 80 | 6 | 162,148,272 | 162,172,718 | 3 | 1 | 4 | 0 |
| Case 80 | 6 | 162,182,126 | 162,493,682 | 3 | 2 | 5 | 0 |
| Case 80 | 6 | 162,507,690 | 162,507,690 | 3 | 0 | 3 | 1 |
| Case 80 | 6 | 162,510,974 | 162,612,003 | 1 | 0 | 1 | 0 |
| Case 80 | 6 | 162,614,973 | 162,703,419 | 3 | 0 | 3 | 1 |
| Case 80 | 6 | 162,709,948 | 162,914,986 | 3 | 2 | 5 | 0 |
| Case 80 | 6 | 162,917,942 | 163,126,601 | 3 | 0 | 3 | 1 |
| Case 80 | 6 | 163,132,529 | 170,980,171 | 3 | 2 | 5 | 0 |
| Case 80 | 7 | 44,935      | 2,400,417   | 3 | 1 | 4 | 0 |
| Case 80 | 7 | 2,400,427   | 2,557,266   | 4 | 1 | 5 | 0 |
| Case 80 | 7 | 2,560,777   | 6,199,635   | 3 | 1 | 4 | 0 |
| Case 80 | 7 | 6,201,305   | 6,579,383   | 4 | 1 | 5 | 0 |
| Case 80 | 7 | 6,587,526   | 6,901,445   | 3 | 1 | 4 | 0 |
| Case 80 | 7 | 6,929,662   | 12,572,742  | 4 | 1 | 5 | 0 |
| Case 80 | 7 | 12,580,007  | 12,801,051  | 3 | 2 | 5 | 0 |
| Case 80 | 7 | 12,801,837  | 12,801,837  | 2 | 2 | 4 | 0 |
| Case 80 | 7 | 12,804,200  | 30,009,362  | 4 | 1 | 5 | 0 |
| Case 80 | 7 | 30,014,068  | 30,014,068  | 3 | 1 | 4 | 0 |
| Case 80 | 7 | 30,044,128  | 30,087,381  | 2 | 1 | 3 | 0 |
| Case 80 | 7 | 30,088,851  | 30,252,637  | 3 | 1 | 4 | 0 |
| Case 80 | 7 | 30,255,901  | 30,446,814  | 2 | 1 | 3 | 0 |
| Case 80 | 7 | 30,460,476  | 30,625,161  | 3 | 1 | 4 | 0 |
| Case 80 | 7 | 30,634,548  | 30,717,043  | 2 | 1 | 3 | 0 |
| Case 80 | 7 | 30,721,871  | 31,174,111  | 3 | 1 | 4 | 0 |
| Case 80 | 7 | 31,175,964  | 39,991,447  | 4 | 1 | 5 | 0 |
| Case 80 | 7 | 39,991,673  | 40,060,180  | 3 | 1 | 4 | 0 |
| Case 80 | 7 | 40,062,866  | 40,135,669  | 3 | 0 | 3 | 1 |
| Case 80 | 7 | 40,155,624  | 40,163,104  | 3 | 1 | 4 | 0 |
| Case 80 | 7 | 40,169,196  | 43,659,242  | 4 | 1 | 5 | 0 |
| Case 80 | 7 | 43,663,184  | 46,028,577  | 3 | 1 | 4 | 0 |
| Case 80 | 7 | 46,033,433  | 47,840,310  | 4 | 1 | 5 | 0 |
| Case 80 | 7 | 47,840,336  | 48,237,802  | 3 | 1 | 4 | 0 |
| Case 80 | 7 | 48,244,414  | 50,455,095  | 4 | 1 | 5 | 0 |
| Case 80 | 7 | 50,459,465  | 51,261,138  | 3 | 1 | 4 | 0 |
| Case 80 | 7 | 51,261,280  | 53,827,111  | 4 | 1 | 5 | 0 |

|         |   |             |             |   |   |   |   |
|---------|---|-------------|-------------|---|---|---|---|
| Case 80 | 7 | 53,836,224  | 53,926,458  | 3 | 2 | 5 | 0 |
| Case 80 | 7 | 53,941,475  | 54,534,597  | 3 | 3 | 6 | 0 |
| Case 80 | 7 | 54,535,622  | 58,019,061  | 3 | 2 | 5 | 0 |
| Case 80 | 7 | 61,056,053  | 73,112,172  | 3 | 2 | 5 | 0 |
| Case 80 | 7 | 73,113,483  | 73,359,124  | 3 | 3 | 6 | 0 |
| Case 80 | 7 | 73,376,167  | 73,536,071  | 3 | 2 | 5 | 0 |
| Case 80 | 7 | 73,538,326  | 89,693,450  | 3 | 1 | 4 | 0 |
| Case 80 | 7 | 89,695,380  | 89,790,560  | 3 | 0 | 3 | 1 |
| Case 80 | 7 | 89,790,575  | 89,874,804  | 3 | 1 | 4 | 0 |
| Case 80 | 7 | 89,880,949  | 90,101,081  | 5 | 1 | 6 | 0 |
| Case 80 | 7 | 90,109,586  | 90,199,232  | 4 | 2 | 6 | 0 |
| Case 80 | 7 | 90,205,434  | 94,926,585  | 3 | 1 | 4 | 0 |
| Case 80 | 7 | 94,927,242  | 95,758,692  | 4 | 1 | 5 | 0 |
| Case 80 | 7 | 95,761,141  | 100,675,367 | 3 | 1 | 4 | 0 |
| Case 80 | 7 | 100,675,376 | 100,685,691 | 2 | 1 | 3 | 0 |
| Case 80 | 7 | 100,685,709 | 105,182,994 | 3 | 1 | 4 | 0 |
| Case 80 | 7 | 105,183,011 | 105,187,723 | 3 | 0 | 3 | 1 |
| Case 80 | 7 | 105,190,530 | 105,200,904 | 1 | 0 | 1 | 0 |
| Case 80 | 7 | 105,204,348 | 105,206,068 | 3 | 0 | 3 | 1 |
| Case 80 | 7 | 105,207,655 | 110,432,334 | 3 | 1 | 4 | 0 |
| Case 80 | 7 | 110,435,602 | 110,435,602 | 2 | 1 | 3 | 0 |
| Case 80 | 7 | 110,439,912 | 110,562,681 | 2 | 0 | 2 | 1 |
| Case 80 | 7 | 110,572,231 | 110,572,231 | 3 | 0 | 3 | 1 |
| Case 80 | 7 | 110,577,992 | 129,501,926 | 3 | 1 | 4 | 0 |
| Case 80 | 7 | 129,505,141 | 129,782,377 | 2 | 2 | 4 | 0 |
| Case 80 | 7 | 129,786,406 | 130,138,106 | 3 | 1 | 4 | 0 |
| Case 80 | 7 | 130,140,766 | 131,126,531 | 4 | 1 | 5 | 0 |
| Case 80 | 7 | 131,128,350 | 133,074,480 | 3 | 1 | 4 | 0 |
| Case 80 | 7 | 133,091,171 | 133,774,841 | 3 | 0 | 3 | 1 |
| Case 80 | 7 | 133,803,962 | 139,548,136 | 3 | 1 | 4 | 0 |
| Case 80 | 7 | 139,548,309 | 140,402,722 | 3 | 2 | 5 | 0 |
| Case 80 | 7 | 140,405,706 | 149,513,152 | 3 | 1 | 4 | 0 |
| Case 80 | 7 | 149,513,480 | 149,517,796 | 2 | 1 | 3 | 0 |
| Case 80 | 7 | 149,517,978 | 159,119,486 | 3 | 1 | 4 | 0 |
| Case 80 | 8 | 164,984     | 8,258,100   | 3 | 0 | 3 | 1 |
| Case 80 | 8 | 8,259,874   | 8,266,397   | 2 | 1 | 3 | 0 |
| Case 80 | 8 | 8,267,096   | 8,456,988   | 2 | 0 | 2 | 1 |
| Case 80 | 8 | 8,460,285   | 18,601,063  | 3 | 0 | 3 | 1 |
| Case 80 | 8 | 18,602,354  | 18,612,464  | 4 | 0 | 4 | 1 |
| Case 80 | 8 | 18,612,612  | 18,665,597  | 2 | 0 | 2 | 1 |
| Case 80 | 8 | 18,665,710  | 19,518,908  | 3 | 0 | 3 | 1 |
| Case 80 | 8 | 19,529,575  | 19,576,471  | 3 | 2 | 5 | 0 |
| Case 80 | 8 | 19,576,883  | 19,576,883  | 3 | 0 | 3 | 1 |
| Case 80 | 8 | 19,577,136  | 19,590,800  | 5 | 0 | 5 | 1 |
| Case 80 | 8 | 19,593,584  | 21,757,661  | 3 | 0 | 3 | 1 |
| Case 80 | 8 | 21,758,672  | 21,896,097  | 4 | 0 | 4 | 1 |
| Case 80 | 8 | 21,903,316  | 22,031,205  | 3 | 0 | 3 | 1 |
| Case 80 | 8 | 22,033,435  | 22,282,748  | 4 | 0 | 4 | 1 |
| Case 80 | 8 | 22,288,995  | 22,819,138  | 3 | 0 | 3 | 1 |
| Case 80 | 8 | 22,830,059  | 23,061,792  | 4 | 0 | 4 | 1 |
| Case 80 | 8 | 23,061,878  | 27,625,201  | 3 | 0 | 3 | 1 |
| Case 80 | 8 | 27,628,886  | 27,630,152  | 2 | 1 | 3 | 0 |
| Case 80 | 8 | 27,633,972  | 27,645,704  | 2 | 0 | 2 | 1 |
| Case 80 | 8 | 27,649,495  | 29,588,279  | 3 | 0 | 3 | 1 |
| Case 80 | 8 | 29,598,009  | 30,434,903  | 4 | 0 | 4 | 1 |
| Case 80 | 8 | 30,437,008  | 37,339,153  | 3 | 0 | 3 | 1 |
| Case 80 | 8 | 37,360,288  | 37,667,471  | 4 | 0 | 4 | 1 |
| Case 80 | 8 | 37,671,140  | 40,740,473  | 3 | 0 | 3 | 1 |
| Case 80 | 8 | 40,741,589  | 43,791,691  | 2 | 2 | 4 | 0 |
| Case 80 | 8 | 46,886,735  | 79,034,856  | 2 | 2 | 4 | 0 |
| Case 80 | 8 | 79,039,530  | 80,111,894  | 3 | 2 | 5 | 0 |



|         |   |             |             |   |   |   |   |
|---------|---|-------------|-------------|---|---|---|---|
| Case 80 | 8 | 80,115,159  | 80,272,544  | 2 | 2 | 4 | 0 |
| Case 80 | 8 | 80,274,461  | 80,756,095  | 3 | 2 | 5 | 0 |
| Case 80 | 8 | 80,762,327  | 90,662,941  | 2 | 2 | 4 | 0 |
| Case 80 | 8 | 90,671,024  | 90,681,455  | 3 | 0 | 3 | 1 |
| Case 80 | 8 | 90,708,428  | 90,912,936  | 3 | 1 | 4 | 0 |
| Case 80 | 8 | 90,914,272  | 91,035,913  | 2 | 1 | 3 | 0 |
| Case 80 | 8 | 91,044,281  | 99,057,903  | 2 | 2 | 4 | 0 |
| Case 80 | 8 | 99,088,251  | 99,201,718  | 3 | 0 | 3 | 1 |
| Case 80 | 8 | 99,203,508  | 120,437,102 | 2 | 2 | 4 | 0 |
| Case 80 | 8 | 120,444,158 | 120,544,948 | 3 | 2 | 5 | 0 |
| Case 80 | 8 | 120,550,360 | 121,766,060 | 2 | 2 | 4 | 0 |
| Case 80 | 8 | 121,770,595 | 122,462,932 | 3 | 2 | 5 | 0 |
| Case 80 | 8 | 122,464,572 | 128,389,730 | 2 | 2 | 4 | 0 |
| Case 80 | 8 | 128,390,660 | 128,440,928 | 3 | 2 | 5 | 0 |
| Case 80 | 8 | 128,441,170 | 128,525,361 | 3 | 3 | 6 | 0 |
| Case 80 | 8 | 128,525,985 | 128,626,960 | 4 | 3 | 7 | 0 |
| Case 80 | 8 | 128,628,601 | 128,628,601 | 2 | 2 | 4 | 0 |
| Case 80 | 8 | 128,628,938 | 128,773,968 | 4 | 2 | 6 | 0 |
| Case 80 | 8 | 128,775,144 | 145,286,483 | 2 | 2 | 4 | 0 |
| Case 80 | 8 | 145,504,343 | 145,653,006 | 3 | 2 | 5 | 0 |
| Case 80 | 8 | 145,655,903 | 145,742,850 | 2 | 2 | 4 | 0 |
| Case 80 | 8 | 145,745,251 | 145,907,087 | 3 | 0 | 3 | 1 |
| Case 80 | 8 | 145,919,126 | 146,107,544 | 3 | 2 | 5 | 0 |
| Case 80 | 8 | 146,107,712 | 146,293,414 | 2 | 2 | 4 | 0 |
| Case 80 | 9 | 46,587      | 626,096     | 3 | 0 | 3 | 1 |
| Case 80 | 9 | 628,788     | 741,001     | 3 | 1 | 4 | 0 |
| Case 80 | 9 | 742,206     | 877,032     | 3 | 0 | 3 | 1 |
| Case 80 | 9 | 877,871     | 1,056,887   | 3 | 1 | 4 | 0 |
| Case 80 | 9 | 1,056,959   | 1,213,024   | 3 | 0 | 3 | 1 |
| Case 80 | 9 | 1,214,563   | 1,475,567   | 3 | 1 | 4 | 0 |
| Case 80 | 9 | 1,481,609   | 1,516,528   | 3 | 0 | 3 | 1 |
| Case 80 | 9 | 1,519,043   | 1,799,943   | 3 | 1 | 4 | 0 |
| Case 80 | 9 | 1,800,027   | 2,116,414   | 3 | 0 | 3 | 1 |
| Case 80 | 9 | 2,120,825   | 2,196,734   | 3 | 1 | 4 | 0 |
| Case 80 | 9 | 2,196,932   | 2,851,026   | 3 | 0 | 3 | 1 |
| Case 80 | 9 | 2,852,747   | 2,951,623   | 3 | 1 | 4 | 0 |
| Case 80 | 9 | 2,954,622   | 3,121,992   | 3 | 0 | 3 | 1 |
| Case 80 | 9 | 3,126,263   | 3,212,494   | 3 | 1 | 4 | 0 |
| Case 80 | 9 | 3,220,602   | 3,579,989   | 3 | 0 | 3 | 1 |
| Case 80 | 9 | 3,584,207   | 3,707,775   | 3 | 1 | 4 | 0 |
| Case 80 | 9 | 3,710,068   | 3,765,198   | 3 | 0 | 3 | 1 |
| Case 80 | 9 | 3,765,395   | 3,856,143   | 3 | 1 | 4 | 0 |
| Case 80 | 9 | 3,861,266   | 3,931,626   | 3 | 0 | 3 | 1 |
| Case 80 | 9 | 3,932,521   | 4,080,780   | 3 | 1 | 4 | 0 |
| Case 80 | 9 | 4,083,297   | 4,149,475   | 3 | 0 | 3 | 1 |
| Case 80 | 9 | 4,150,202   | 4,219,259   | 3 | 1 | 4 | 0 |
| Case 80 | 9 | 4,221,298   | 4,307,572   | 3 | 0 | 3 | 1 |
| Case 80 | 9 | 4,307,589   | 4,576,774   | 3 | 1 | 4 | 0 |
| Case 80 | 9 | 4,577,130   | 4,763,176   | 3 | 0 | 3 | 1 |
| Case 80 | 9 | 4,763,368   | 4,985,879   | 3 | 1 | 4 | 0 |
| Case 80 | 9 | 5,003,338   | 5,022,807   | 3 | 0 | 3 | 1 |
| Case 80 | 9 | 5,029,893   | 5,485,241   | 5 | 0 | 5 | 1 |
| Case 80 | 9 | 5,485,307   | 5,551,385   | 3 | 0 | 3 | 1 |
| Case 80 | 9 | 5,555,023   | 5,750,198   | 3 | 1 | 4 | 0 |
| Case 80 | 9 | 5,756,067   | 6,222,302   | 3 | 0 | 3 | 1 |
| Case 80 | 9 | 6,225,535   | 6,308,729   | 3 | 1 | 4 | 0 |
| Case 80 | 9 | 6,324,744   | 6,450,183   | 3 | 0 | 3 | 1 |
| Case 80 | 9 | 6,455,048   | 6,811,507   | 3 | 1 | 4 | 0 |
| Case 80 | 9 | 6,818,197   | 7,038,043   | 3 | 0 | 3 | 1 |
| Case 80 | 9 | 7,046,703   | 7,272,552   | 3 | 1 | 4 | 0 |
| Case 80 | 9 | 7,273,950   | 7,390,508   | 3 | 0 | 3 | 1 |

|         |   |            |            |   |   |   |   |
|---------|---|------------|------------|---|---|---|---|
| Case 80 | 9 | 7,391,634  | 7,512,610  | 3 | 1 | 4 | 0 |
| Case 80 | 9 | 7,512,820  | 7,534,603  | 3 | 0 | 3 | 1 |
| Case 80 | 9 | 7,535,872  | 7,764,226  | 3 | 1 | 4 | 0 |
| Case 80 | 9 | 7,764,377  | 8,270,002  | 3 | 0 | 3 | 1 |
| Case 80 | 9 | 8,270,830  | 8,382,718  | 3 | 1 | 4 | 0 |
| Case 80 | 9 | 8,382,720  | 8,682,672  | 3 | 0 | 3 | 1 |
| Case 80 | 9 | 8,692,722  | 8,852,226  | 2 | 1 | 3 | 0 |
| Case 80 | 9 | 8,852,668  | 8,926,071  | 3 | 1 | 4 | 0 |
| Case 80 | 9 | 8,926,956  | 8,999,697  | 3 | 0 | 3 | 1 |
| Case 80 | 9 | 9,000,033  | 9,042,840  | 3 | 1 | 4 | 0 |
| Case 80 | 9 | 9,043,421  | 9,733,974  | 3 | 0 | 3 | 1 |
| Case 80 | 9 | 9,736,054  | 9,772,397  | 3 | 1 | 4 | 0 |
| Case 80 | 9 | 9,774,194  | 10,368,596 | 3 | 0 | 3 | 1 |
| Case 80 | 9 | 10,369,161 | 10,432,920 | 3 | 1 | 4 | 0 |
| Case 80 | 9 | 10,436,451 | 12,926,571 | 3 | 0 | 3 | 1 |
| Case 80 | 9 | 12,928,475 | 13,095,067 | 3 | 1 | 4 | 0 |
| Case 80 | 9 | 13,095,872 | 13,250,302 | 3 | 0 | 3 | 1 |
| Case 80 | 9 | 13,251,770 | 13,352,941 | 3 | 1 | 4 | 0 |
| Case 80 | 9 | 13,354,300 | 14,005,103 | 3 | 0 | 3 | 1 |
| Case 80 | 9 | 14,005,900 | 14,079,067 | 3 | 1 | 4 | 0 |
| Case 80 | 9 | 14,085,583 | 14,210,653 | 3 | 0 | 3 | 1 |
| Case 80 | 9 | 14,211,843 | 14,544,731 | 3 | 1 | 4 | 0 |
| Case 80 | 9 | 14,547,556 | 14,678,017 | 3 | 0 | 3 | 1 |
| Case 80 | 9 | 14,678,115 | 14,900,356 | 3 | 1 | 4 | 0 |
| Case 80 | 9 | 14,901,322 | 15,017,840 | 3 | 0 | 3 | 1 |
| Case 80 | 9 | 15,021,481 | 15,444,648 | 3 | 1 | 4 | 0 |
| Case 80 | 9 | 15,447,191 | 15,585,395 | 2 | 1 | 3 | 0 |
| Case 80 | 9 | 15,591,372 | 15,973,288 | 3 | 0 | 3 | 1 |
| Case 80 | 9 | 15,975,069 | 16,527,829 | 3 | 1 | 4 | 0 |
| Case 80 | 9 | 16,529,174 | 17,539,320 | 3 | 0 | 3 | 1 |
| Case 80 | 9 | 17,564,267 | 17,735,707 | 3 | 1 | 4 | 0 |
| Case 80 | 9 | 17,735,905 | 17,916,555 | 3 | 0 | 3 | 1 |
| Case 80 | 9 | 17,918,806 | 18,161,098 | 3 | 1 | 4 | 0 |
| Case 80 | 9 | 18,163,165 | 18,250,459 | 2 | 1 | 3 | 0 |
| Case 80 | 9 | 18,251,855 | 18,392,900 | 3 | 0 | 3 | 1 |
| Case 80 | 9 | 18,393,875 | 18,494,532 | 3 | 1 | 4 | 0 |
| Case 80 | 9 | 18,495,515 | 18,723,698 | 3 | 0 | 3 | 1 |
| Case 80 | 9 | 18,727,082 | 19,049,665 | 3 | 1 | 4 | 0 |
| Case 80 | 9 | 19,051,208 | 19,058,396 | 3 | 0 | 3 | 1 |
| Case 80 | 9 | 19,058,448 | 19,258,183 | 5 | 0 | 5 | 1 |
| Case 80 | 9 | 19,281,501 | 19,454,906 | 3 | 0 | 3 | 1 |
| Case 80 | 9 | 19,458,939 | 19,801,918 | 3 | 1 | 4 | 0 |
| Case 80 | 9 | 19,803,724 | 20,098,711 | 3 | 0 | 3 | 1 |
| Case 80 | 9 | 20,101,645 | 20,603,364 | 3 | 1 | 4 | 0 |
| Case 80 | 9 | 20,605,854 | 21,543,444 | 3 | 0 | 3 | 1 |
| Case 80 | 9 | 21,547,035 | 21,606,786 | 3 | 1 | 4 | 0 |
| Case 80 | 9 | 21,611,256 | 21,675,545 | 3 | 0 | 3 | 1 |
| Case 80 | 9 | 21,682,759 | 21,930,505 | 3 | 1 | 4 | 0 |
| Case 80 | 9 | 21,934,442 | 22,078,305 | 3 | 0 | 3 | 1 |
| Case 80 | 9 | 22,082,375 | 22,138,762 | 3 | 1 | 4 | 0 |
| Case 80 | 9 | 22,140,224 | 23,557,227 | 3 | 0 | 3 | 1 |
| Case 80 | 9 | 23,560,604 | 23,642,085 | 3 | 1 | 4 | 0 |
| Case 80 | 9 | 23,643,682 | 25,909,114 | 3 | 0 | 3 | 1 |
| Case 80 | 9 | 25,913,301 | 26,200,057 | 2 | 1 | 3 | 0 |
| Case 80 | 9 | 26,201,458 | 26,294,087 | 2 | 0 | 2 | 1 |
| Case 80 | 9 | 26,296,319 | 26,317,973 | 3 | 0 | 3 | 1 |
| Case 80 | 9 | 26,318,151 | 26,553,400 | 2 | 1 | 3 | 0 |
| Case 80 | 9 | 26,555,763 | 26,659,562 | 3 | 1 | 4 | 0 |
| Case 80 | 9 | 26,665,482 | 26,717,062 | 3 | 0 | 3 | 1 |
| Case 80 | 9 | 26,719,332 | 26,789,940 | 3 | 1 | 4 | 0 |
| Case 80 | 9 | 26,790,633 | 27,099,244 | 3 | 0 | 3 | 1 |

|         |   |            |            |   |   |   |   |
|---------|---|------------|------------|---|---|---|---|
| Case 80 | 9 | 27,107,349 | 27,519,173 | 3 | 1 | 4 | 0 |
| Case 80 | 9 | 27,522,870 | 28,195,206 | 3 | 0 | 3 | 1 |
| Case 80 | 9 | 28,198,828 | 28,256,245 | 3 | 1 | 4 | 0 |
| Case 80 | 9 | 28,257,148 | 28,377,370 | 3 | 0 | 3 | 1 |
| Case 80 | 9 | 28,378,229 | 28,407,379 | 3 | 1 | 4 | 0 |
| Case 80 | 9 | 28,407,568 | 28,571,014 | 3 | 0 | 3 | 1 |
| Case 80 | 9 | 28,572,086 | 28,773,602 | 3 | 1 | 4 | 0 |
| Case 80 | 9 | 28,773,625 | 29,112,301 | 3 | 0 | 3 | 1 |
| Case 80 | 9 | 29,119,535 | 29,258,978 | 2 | 1 | 3 | 0 |
| Case 80 | 9 | 29,261,935 | 29,350,462 | 2 | 0 | 2 | 1 |
| Case 80 | 9 | 29,350,850 | 29,363,582 | 4 | 0 | 4 | 1 |
| Case 80 | 9 | 29,364,327 | 29,535,541 | 1 | 1 | 2 | 0 |
| Case 80 | 9 | 29,536,618 | 29,614,435 | 3 | 0 | 3 | 1 |
| Case 80 | 9 | 29,616,943 | 29,640,181 | 3 | 1 | 4 | 0 |
| Case 80 | 9 | 29,640,242 | 29,700,159 | 3 | 0 | 3 | 1 |
| Case 80 | 9 | 29,706,139 | 29,919,239 | 3 | 1 | 4 | 0 |
| Case 80 | 9 | 29,921,183 | 32,071,702 | 3 | 0 | 3 | 1 |
| Case 80 | 9 | 32,078,175 | 32,282,978 | 3 | 1 | 4 | 0 |
| Case 80 | 9 | 32,283,644 | 32,735,066 | 3 | 0 | 3 | 1 |
| Case 80 | 9 | 32,738,005 | 32,889,948 | 3 | 1 | 4 | 0 |
| Case 80 | 9 | 32,899,807 | 33,117,524 | 3 | 0 | 3 | 1 |
| Case 80 | 9 | 33,120,483 | 33,256,825 | 3 | 1 | 4 | 0 |
| Case 80 | 9 | 33,256,854 | 33,401,245 | 3 | 0 | 3 | 1 |
| Case 80 | 9 | 33,404,808 | 33,804,813 | 3 | 1 | 4 | 0 |
| Case 80 | 9 | 33,810,791 | 34,085,077 | 3 | 0 | 3 | 1 |
| Case 80 | 9 | 34,085,859 | 34,244,227 | 3 | 1 | 4 | 0 |
| Case 80 | 9 | 34,249,882 | 34,311,195 | 3 | 0 | 3 | 1 |
| Case 80 | 9 | 34,316,467 | 34,334,126 | 0 | 0 | 0 | 0 |
| Case 80 | 9 | 34,339,126 | 34,710,450 | 3 | 0 | 3 | 1 |
| Case 80 | 9 | 34,713,129 | 34,996,426 | 3 | 1 | 4 | 0 |
| Case 80 | 9 | 34,996,474 | 35,482,764 | 3 | 0 | 3 | 1 |
| Case 80 | 9 | 35,489,274 | 35,546,735 | 3 | 1 | 4 | 0 |
| Case 80 | 9 | 35,547,052 | 35,750,887 | 3 | 0 | 3 | 1 |
| Case 80 | 9 | 35,751,221 | 35,811,215 | 3 | 1 | 4 | 0 |
| Case 80 | 9 | 35,811,228 | 35,975,125 | 3 | 0 | 3 | 1 |
| Case 80 | 9 | 35,978,258 | 36,100,504 | 3 | 1 | 4 | 0 |
| Case 80 | 9 | 36,101,562 | 36,137,346 | 3 | 0 | 3 | 1 |
| Case 80 | 9 | 36,137,513 | 36,169,723 | 3 | 1 | 4 | 0 |
| Case 80 | 9 | 36,169,848 | 36,722,345 | 3 | 0 | 3 | 1 |
| Case 80 | 9 | 36,722,854 | 37,126,588 | 3 | 1 | 4 | 0 |
| Case 80 | 9 | 37,126,682 | 37,377,959 | 3 | 0 | 3 | 1 |
| Case 80 | 9 | 37,378,628 | 37,426,543 | 3 | 1 | 4 | 0 |
| Case 80 | 9 | 37,426,590 | 37,627,872 | 2 | 1 | 3 | 0 |
| Case 80 | 9 | 37,629,310 | 37,739,932 | 3 | 1 | 4 | 0 |
| Case 80 | 9 | 37,740,134 | 37,866,551 | 2 | 1 | 3 | 0 |
| Case 80 | 9 | 37,874,090 | 38,333,064 | 3 | 1 | 4 | 0 |
| Case 80 | 9 | 38,335,032 | 38,404,352 | 3 | 0 | 3 | 1 |
| Case 80 | 9 | 38,404,579 | 46,944,322 | 3 | 1 | 4 | 0 |
| Case 80 | 9 | 65,629,772 | 71,621,276 | 3 | 1 | 4 | 0 |
| Case 80 | 9 | 71,621,922 | 71,846,783 | 3 | 0 | 3 | 1 |
| Case 80 | 9 | 71,849,766 | 71,891,756 | 3 | 1 | 4 | 0 |
| Case 80 | 9 | 71,893,554 | 72,435,894 | 3 | 0 | 3 | 1 |
| Case 80 | 9 | 72,440,451 | 72,783,618 | 3 | 1 | 4 | 0 |
| Case 80 | 9 | 72,785,531 | 72,979,246 | 3 | 0 | 3 | 1 |
| Case 80 | 9 | 72,989,832 | 73,508,693 | 3 | 1 | 4 | 0 |
| Case 80 | 9 | 73,509,677 | 74,821,250 | 3 | 0 | 3 | 1 |
| Case 80 | 9 | 74,825,707 | 74,932,819 | 3 | 1 | 4 | 0 |
| Case 80 | 9 | 74,938,125 | 75,139,296 | 2 | 1 | 3 | 0 |
| Case 80 | 9 | 75,144,147 | 75,229,248 | 3 | 1 | 4 | 0 |
| Case 80 | 9 | 75,231,217 | 75,542,080 | 3 | 0 | 3 | 1 |
| Case 80 | 9 | 75,542,895 | 75,547,612 | 3 | 1 | 4 | 0 |

|         |   |            |            |   |   |   |   |
|---------|---|------------|------------|---|---|---|---|
| Case 80 | 9 | 75,549,810 | 77,830,570 | 3 | 0 | 3 | 1 |
| Case 80 | 9 | 77,830,922 | 78,250,722 | 3 | 1 | 4 | 0 |
| Case 80 | 9 | 78,251,232 | 78,718,544 | 3 | 0 | 3 | 1 |
| Case 80 | 9 | 78,718,893 | 78,784,693 | 3 | 1 | 4 | 0 |
| Case 80 | 9 | 78,785,098 | 78,933,874 | 3 | 0 | 3 | 1 |
| Case 80 | 9 | 78,936,357 | 78,959,679 | 3 | 1 | 4 | 0 |
| Case 80 | 9 | 78,961,388 | 79,065,299 | 3 | 0 | 3 | 1 |
| Case 80 | 9 | 79,068,627 | 79,160,759 | 3 | 1 | 4 | 0 |
| Case 80 | 9 | 79,164,646 | 79,188,714 | 3 | 0 | 3 | 1 |
| Case 80 | 9 | 79,189,090 | 79,244,174 | 5 | 0 | 5 | 1 |
| Case 80 | 9 | 79,251,229 | 79,320,000 | 3 | 0 | 3 | 1 |
| Case 80 | 9 | 79,320,095 | 79,436,617 | 3 | 1 | 4 | 0 |
| Case 80 | 9 | 79,437,798 | 79,664,633 | 3 | 0 | 3 | 1 |
| Case 80 | 9 | 79,664,647 | 79,700,008 | 3 | 1 | 4 | 0 |
| Case 80 | 9 | 79,702,675 | 80,039,006 | 3 | 0 | 3 | 1 |
| Case 80 | 9 | 80,039,658 | 80,813,860 | 3 | 1 | 4 | 0 |
| Case 80 | 9 | 80,827,249 | 80,901,335 | 2 | 1 | 3 | 0 |
| Case 80 | 9 | 80,906,946 | 81,337,236 | 3 | 1 | 4 | 0 |
| Case 80 | 9 | 81,339,569 | 81,436,959 | 3 | 0 | 3 | 1 |
| Case 80 | 9 | 81,438,539 | 81,626,352 | 3 | 1 | 4 | 0 |
| Case 80 | 9 | 81,627,699 | 81,759,693 | 3 | 0 | 3 | 1 |
| Case 80 | 9 | 81,760,880 | 81,791,960 | 3 | 1 | 4 | 0 |
| Case 80 | 9 | 81,800,073 | 82,352,255 | 3 | 0 | 3 | 1 |
| Case 80 | 9 | 82,354,524 | 82,588,226 | 3 | 1 | 4 | 0 |
| Case 80 | 9 | 82,592,333 | 82,796,707 | 3 | 0 | 3 | 1 |
| Case 80 | 9 | 82,805,488 | 83,175,451 | 2 | 1 | 3 | 0 |
| Case 80 | 9 | 83,180,858 | 83,235,117 | 3 | 1 | 4 | 0 |
| Case 80 | 9 | 83,235,735 | 83,643,410 | 3 | 0 | 3 | 1 |
| Case 80 | 9 | 83,643,525 | 83,721,188 | 3 | 1 | 4 | 0 |
| Case 80 | 9 | 83,721,515 | 83,998,047 | 3 | 0 | 3 | 1 |
| Case 80 | 9 | 83,998,114 | 84,183,462 | 3 | 1 | 4 | 0 |
| Case 80 | 9 | 84,185,097 | 84,256,984 | 3 | 0 | 3 | 1 |
| Case 80 | 9 | 84,261,124 | 84,305,732 | 3 | 1 | 4 | 0 |
| Case 80 | 9 | 84,308,948 | 85,181,786 | 3 | 0 | 3 | 1 |
| Case 80 | 9 | 85,182,996 | 85,521,271 | 3 | 1 | 4 | 0 |
| Case 80 | 9 | 85,524,530 | 86,700,822 | 3 | 0 | 3 | 1 |
| Case 80 | 9 | 86,701,021 | 86,721,015 | 3 | 1 | 4 | 0 |
| Case 80 | 9 | 86,721,077 | 86,820,581 | 3 | 0 | 3 | 1 |
| Case 80 | 9 | 86,824,068 | 86,955,157 | 3 | 1 | 4 | 0 |
| Case 80 | 9 | 86,955,535 | 87,177,985 | 3 | 0 | 3 | 1 |
| Case 80 | 9 | 87,179,264 | 87,484,613 | 3 | 1 | 4 | 0 |
| Case 80 | 9 | 87,488,718 | 87,570,912 | 3 | 0 | 3 | 1 |
| Case 80 | 9 | 87,573,977 | 87,612,473 | 3 | 1 | 4 | 0 |
| Case 80 | 9 | 87,616,257 | 87,701,841 | 3 | 0 | 3 | 1 |
| Case 80 | 9 | 87,703,126 | 87,811,640 | 3 | 1 | 4 | 0 |
| Case 80 | 9 | 87,820,596 | 89,126,786 | 3 | 0 | 3 | 1 |
| Case 80 | 9 | 89,134,626 | 89,444,725 | 3 | 1 | 4 | 0 |
| Case 80 | 9 | 89,445,581 | 89,620,854 | 3 | 0 | 3 | 1 |
| Case 80 | 9 | 89,622,864 | 89,951,915 | 3 | 1 | 4 | 0 |
| Case 80 | 9 | 89,954,522 | 90,034,729 | 3 | 0 | 3 | 1 |
| Case 80 | 9 | 90,036,219 | 90,041,160 | 2 | 1 | 3 | 0 |
| Case 80 | 9 | 90,043,880 | 90,297,680 | 3 | 1 | 4 | 0 |
| Case 80 | 9 | 90,307,057 | 90,363,086 | 2 | 1 | 3 | 0 |
| Case 80 | 9 | 90,364,627 | 90,405,210 | 3 | 1 | 4 | 0 |
| Case 80 | 9 | 90,408,599 | 90,650,132 | 3 | 0 | 3 | 1 |
| Case 80 | 9 | 90,650,880 | 90,721,446 | 3 | 1 | 4 | 0 |
| Case 80 | 9 | 90,722,248 | 90,808,582 | 3 | 0 | 3 | 1 |
| Case 80 | 9 | 90,811,182 | 90,839,031 | 3 | 1 | 4 | 0 |
| Case 80 | 9 | 90,841,066 | 91,271,165 | 3 | 0 | 3 | 1 |
| Case 80 | 9 | 91,272,494 | 91,638,212 | 3 | 1 | 4 | 0 |
| Case 80 | 9 | 91,641,563 | 92,016,916 | 3 | 0 | 3 | 1 |

|         |   |             |             |   |   |   |   |
|---------|---|-------------|-------------|---|---|---|---|
| Case 80 | 9 | 92,017,824  | 92,897,338  | 3 | 1 | 4 | 0 |
| Case 80 | 9 | 92,898,149  | 93,530,909  | 3 | 0 | 3 | 1 |
| Case 80 | 9 | 93,539,879  | 93,606,572  | 2 | 1 | 3 | 0 |
| Case 80 | 9 | 93,608,739  | 93,641,175  | 3 | 1 | 4 | 0 |
| Case 80 | 9 | 93,641,199  | 93,665,389  | 3 | 0 | 3 | 1 |
| Case 80 | 9 | 93,665,453  | 93,983,200  | 3 | 1 | 4 | 0 |
| Case 80 | 9 | 93,983,209  | 94,398,847  | 3 | 0 | 3 | 1 |
| Case 80 | 9 | 94,403,445  | 94,629,592  | 3 | 1 | 4 | 0 |
| Case 80 | 9 | 94,631,630  | 94,864,322  | 3 | 0 | 3 | 1 |
| Case 80 | 9 | 94,880,110  | 94,951,819  | 3 | 1 | 4 | 0 |
| Case 80 | 9 | 94,962,103  | 95,860,415  | 3 | 0 | 3 | 1 |
| Case 80 | 9 | 95,869,726  | 96,099,377  | 5 | 0 | 5 | 1 |
| Case 80 | 9 | 96,117,149  | 96,524,226  | 3 | 0 | 3 | 1 |
| Case 80 | 9 | 96,526,835  | 96,795,797  | 3 | 1 | 4 | 0 |
| Case 80 | 9 | 96,802,897  | 97,314,741  | 3 | 0 | 3 | 1 |
| Case 80 | 9 | 97,321,127  | 98,559,246  | 3 | 1 | 4 | 0 |
| Case 80 | 9 | 98,568,543  | 98,781,179  | 3 | 0 | 3 | 1 |
| Case 80 | 9 | 98,786,276  | 98,818,646  | 3 | 1 | 4 | 0 |
| Case 80 | 9 | 98,823,407  | 99,054,604  | 3 | 0 | 3 | 1 |
| Case 80 | 9 | 99,056,209  | 99,097,527  | 3 | 1 | 4 | 0 |
| Case 80 | 9 | 99,108,678  | 99,832,156  | 3 | 0 | 3 | 1 |
| Case 80 | 9 | 99,838,751  | 100,269,291 | 2 | 1 | 3 | 0 |
| Case 80 | 9 | 100,270,198 | 100,381,034 | 3 | 1 | 4 | 0 |
| Case 80 | 9 | 100,388,119 | 100,420,142 | 2 | 1 | 3 | 0 |
| Case 80 | 9 | 100,426,712 | 100,482,976 | 3 | 0 | 3 | 1 |
| Case 80 | 9 | 100,498,831 | 100,637,339 | 3 | 1 | 4 | 0 |
| Case 80 | 9 | 100,650,096 | 100,922,874 | 3 | 0 | 3 | 1 |
| Case 80 | 9 | 100,925,136 | 100,970,307 | 3 | 1 | 4 | 0 |
| Case 80 | 9 | 100,971,116 | 101,056,152 | 3 | 0 | 3 | 1 |
| Case 80 | 9 | 101,063,070 | 101,533,973 | 3 | 1 | 4 | 0 |
| Case 80 | 9 | 101,534,397 | 101,647,469 | 3 | 0 | 3 | 1 |
| Case 80 | 9 | 101,649,752 | 101,685,520 | 3 | 1 | 4 | 0 |
| Case 80 | 9 | 101,687,361 | 101,804,329 | 3 | 0 | 3 | 1 |
| Case 80 | 9 | 101,804,366 | 102,076,659 | 2 | 1 | 3 | 0 |
| Case 80 | 9 | 102,079,390 | 102,159,610 | 3 | 1 | 4 | 0 |
| Case 80 | 9 | 102,168,293 | 103,391,639 | 3 | 0 | 3 | 1 |
| Case 80 | 9 | 103,403,174 | 103,485,819 | 3 | 1 | 4 | 0 |
| Case 80 | 9 | 103,486,169 | 103,912,602 | 3 | 0 | 3 | 1 |
| Case 80 | 9 | 103,919,670 | 104,439,370 | 5 | 0 | 5 | 1 |
| Case 80 | 9 | 104,443,319 | 104,939,023 | 3 | 0 | 3 | 1 |
| Case 80 | 9 | 104,940,829 | 104,951,839 | 3 | 1 | 4 | 0 |
| Case 80 | 9 | 104,954,524 | 105,259,717 | 3 | 0 | 3 | 1 |
| Case 80 | 9 | 105,266,273 | 105,422,136 | 3 | 1 | 4 | 0 |
| Case 80 | 9 | 105,422,608 | 105,518,491 | 3 | 0 | 3 | 1 |
| Case 80 | 9 | 105,521,808 | 105,767,349 | 2 | 1 | 3 | 0 |
| Case 80 | 9 | 105,767,404 | 106,195,084 | 3 | 0 | 3 | 1 |
| Case 80 | 9 | 106,205,224 | 106,722,204 | 3 | 1 | 4 | 0 |
| Case 80 | 9 | 106,723,148 | 107,547,872 | 3 | 0 | 3 | 1 |
| Case 80 | 9 | 107,548,375 | 107,701,183 | 3 | 1 | 4 | 0 |
| Case 80 | 9 | 107,704,228 | 107,726,070 | 3 | 0 | 3 | 1 |
| Case 80 | 9 | 107,726,821 | 108,094,256 | 3 | 1 | 4 | 0 |
| Case 80 | 9 | 108,097,888 | 108,641,808 | 3 | 0 | 3 | 1 |
| Case 80 | 9 | 108,642,694 | 108,925,389 | 3 | 1 | 4 | 0 |
| Case 80 | 9 | 108,926,464 | 109,153,027 | 3 | 0 | 3 | 1 |
| Case 80 | 9 | 109,154,423 | 109,292,568 | 3 | 1 | 4 | 0 |
| Case 80 | 9 | 109,296,536 | 109,658,333 | 2 | 1 | 3 | 0 |
| Case 80 | 9 | 109,661,016 | 109,942,554 | 3 | 1 | 4 | 0 |
| Case 80 | 9 | 109,943,165 | 109,989,135 | 3 | 0 | 3 | 1 |
| Case 80 | 9 | 109,991,942 | 110,031,745 | 3 | 1 | 4 | 0 |
| Case 80 | 9 | 110,032,498 | 110,231,863 | 3 | 0 | 3 | 1 |
| Case 80 | 9 | 110,238,361 | 110,346,728 | 3 | 1 | 4 | 0 |

|         |    |             |             |   |   |   |   |
|---------|----|-------------|-------------|---|---|---|---|
| Case 80 | 9  | 110,350,727 | 110,632,874 | 3 | 0 | 3 | 1 |
| Case 80 | 9  | 110,635,349 | 111,626,090 | 3 | 1 | 4 | 0 |
| Case 80 | 9  | 111,628,667 | 111,870,811 | 3 | 0 | 3 | 1 |
| Case 80 | 9  | 111,880,736 | 112,251,563 | 3 | 1 | 4 | 0 |
| Case 80 | 9  | 112,253,555 | 112,477,012 | 3 | 0 | 3 | 1 |
| Case 80 | 9  | 112,477,726 | 112,705,112 | 3 | 1 | 4 | 0 |
| Case 80 | 9  | 112,705,167 | 112,869,277 | 3 | 0 | 3 | 1 |
| Case 80 | 9  | 112,873,868 | 113,063,439 | 3 | 1 | 4 | 0 |
| Case 80 | 9  | 113,065,962 | 114,346,041 | 3 | 0 | 3 | 1 |
| Case 80 | 9  | 114,347,401 | 114,453,006 | 3 | 1 | 4 | 0 |
| Case 80 | 9  | 114,453,843 | 114,645,077 | 3 | 0 | 3 | 1 |
| Case 80 | 9  | 114,654,601 | 114,844,883 | 3 | 1 | 4 | 0 |
| Case 80 | 9  | 114,846,751 | 114,846,751 | 3 | 0 | 3 | 1 |
| Case 80 | 9  | 114,850,190 | 114,960,138 | 5 | 0 | 5 | 1 |
| Case 80 | 9  | 114,963,346 | 115,634,282 | 3 | 0 | 3 | 1 |
| Case 80 | 9  | 115,637,018 | 115,720,888 | 3 | 1 | 4 | 0 |
| Case 80 | 9  | 115,722,489 | 115,811,102 | 3 | 0 | 3 | 1 |
| Case 80 | 9  | 115,811,720 | 115,931,512 | 3 | 1 | 4 | 0 |
| Case 80 | 9  | 115,931,746 | 116,021,136 | 3 | 0 | 3 | 1 |
| Case 80 | 9  | 116,025,024 | 116,121,520 | 3 | 1 | 4 | 0 |
| Case 80 | 9  | 116,122,326 | 116,407,227 | 3 | 0 | 3 | 1 |
| Case 80 | 9  | 116,409,528 | 116,435,724 | 3 | 1 | 4 | 0 |
| Case 80 | 9  | 116,436,877 | 116,708,823 | 3 | 0 | 3 | 1 |
| Case 80 | 9  | 116,710,512 | 116,736,791 | 3 | 1 | 4 | 0 |
| Case 80 | 9  | 116,737,382 | 117,156,596 | 3 | 0 | 3 | 1 |
| Case 80 | 9  | 117,157,334 | 117,691,558 | 3 | 1 | 4 | 0 |
| Case 80 | 9  | 117,692,463 | 117,844,149 | 3 | 0 | 3 | 1 |
| Case 80 | 9  | 117,844,239 | 118,413,485 | 3 | 1 | 4 | 0 |
| Case 80 | 9  | 118,413,515 | 118,716,486 | 3 | 0 | 3 | 1 |
| Case 80 | 9  | 118,719,627 | 127,204,712 | 3 | 1 | 4 | 0 |
| Case 80 | 9  | 127,205,611 | 127,589,808 | 3 | 0 | 3 | 1 |
| Case 80 | 9  | 127,594,371 | 130,420,813 | 3 | 1 | 4 | 0 |
| Case 80 | 9  | 130,422,312 | 130,511,737 | 3 | 0 | 3 | 1 |
| Case 80 | 9  | 130,523,904 | 130,889,600 | 3 | 1 | 4 | 0 |
| Case 80 | 9  | 130,891,060 | 131,944,138 | 3 | 0 | 3 | 1 |
| Case 80 | 9  | 131,948,373 | 132,298,733 | 3 | 1 | 4 | 0 |
| Case 80 | 9  | 132,302,923 | 132,515,730 | 3 | 0 | 3 | 1 |
| Case 80 | 9  | 132,522,269 | 133,755,543 | 3 | 1 | 4 | 0 |
| Case 80 | 9  | 133,755,754 | 133,778,117 | 3 | 0 | 3 | 1 |
| Case 80 | 9  | 133,779,020 | 133,927,878 | 3 | 1 | 4 | 0 |
| Case 80 | 9  | 133,927,922 | 133,963,142 | 3 | 0 | 3 | 1 |
| Case 80 | 9  | 133,963,151 | 134,019,961 | 3 | 1 | 4 | 0 |
| Case 80 | 9  | 134,019,979 | 134,223,191 | 3 | 0 | 3 | 1 |
| Case 80 | 9  | 134,225,572 | 135,841,437 | 4 | 0 | 4 | 1 |
| Case 80 | 9  | 135,842,952 | 136,086,916 | 5 | 0 | 5 | 1 |
| Case 80 | 9  | 136,096,626 | 136,291,338 | 4 | 0 | 4 | 1 |
| Case 80 | 9  | 136,291,361 | 136,335,824 | 3 | 0 | 3 | 1 |
| Case 80 | 9  | 136,337,168 | 137,489,483 | 4 | 0 | 4 | 1 |
| Case 80 | 9  | 137,490,048 | 137,806,260 | 3 | 0 | 3 | 1 |
| Case 80 | 9  | 137,806,265 | 138,104,368 | 4 | 0 | 4 | 1 |
| Case 80 | 9  | 138,104,497 | 138,830,158 | 3 | 0 | 3 | 1 |
| Case 80 | 9  | 138,836,946 | 139,396,332 | 4 | 0 | 4 | 1 |
| Case 80 | 9  | 139,399,132 | 139,556,771 | 5 | 0 | 5 | 1 |
| Case 80 | 9  | 139,563,043 | 141,066,491 | 4 | 0 | 4 | 1 |
| Case 80 | 10 | 98,087      | 3,185,393   | 5 | 0 | 5 | 1 |
| Case 80 | 10 | 3,185,599   | 3,212,360   | 4 | 0 | 4 | 1 |
| Case 80 | 10 | 3,212,382   | 5,437,426   | 5 | 0 | 5 | 1 |
| Case 80 | 10 | 5,437,430   | 5,437,430   | 3 | 0 | 3 | 1 |
| Case 80 | 10 | 5,441,973   | 5,874,958   | 6 | 0 | 6 | 1 |
| Case 80 | 10 | 5,877,213   | 39,088,829  | 5 | 0 | 5 | 1 |
| Case 80 | 10 | 39,097,912  | 39,097,912  | 4 | 0 | 4 | 1 |

|         |    |             |             |   |   |   |   |
|---------|----|-------------|-------------|---|---|---|---|
| Case 80 | 10 | 42,436,301  | 42,509,794  | 2 | 0 | 2 | 1 |
| Case 80 | 10 | 42,682,133  | 64,949,103  | 3 | 0 | 3 | 1 |
| Case 80 | 10 | 64,949,422  | 64,973,978  | 2 | 1 | 3 | 0 |
| Case 80 | 10 | 64,974,017  | 64,993,101  | 2 | 0 | 2 | 1 |
| Case 80 | 10 | 65,027,610  | 91,465,118  | 3 | 0 | 3 | 1 |
| Case 80 | 10 | 91,465,167  | 91,465,167  | 2 | 1 | 3 | 0 |
| Case 80 | 10 | 91,468,925  | 91,518,638  | 2 | 0 | 2 | 1 |
| Case 80 | 10 | 91,520,368  | 102,383,988 | 3 | 0 | 3 | 1 |
| Case 80 | 10 | 102,387,274 | 102,820,392 | 4 | 0 | 4 | 1 |
| Case 80 | 10 | 102,822,575 | 112,555,409 | 3 | 0 | 3 | 1 |
| Case 80 | 10 | 112,555,472 | 112,753,721 | 5 | 0 | 5 | 1 |
| Case 80 | 10 | 112,763,385 | 123,937,461 | 3 | 0 | 3 | 1 |
| Case 80 | 10 | 123,944,489 | 124,015,709 | 1 | 0 | 1 | 0 |
| Case 80 | 10 | 124,015,986 | 124,085,736 | 0 | 0 | 0 | 0 |
| Case 80 | 10 | 124,086,757 | 124,086,757 | 3 | 0 | 3 | 1 |
| Case 80 | 10 | 124,087,092 | 124,109,093 | 1 | 0 | 1 | 0 |
| Case 80 | 10 | 124,114,356 | 124,126,761 | 0 | 0 | 0 | 0 |
| Case 80 | 10 | 124,132,188 | 134,073,886 | 3 | 0 | 3 | 1 |
| Case 80 | 10 | 134,079,092 | 134,283,875 | 4 | 0 | 4 | 1 |
| Case 80 | 10 | 134,285,403 | 135,477,883 | 3 | 0 | 3 | 1 |
| Case 80 | 11 | 193,146     | 298,542     | 5 | 0 | 5 | 1 |
| Case 80 | 11 | 298,562     | 477,623     | 4 | 0 | 4 | 1 |
| Case 80 | 11 | 479,108     | 521,302     | 3 | 0 | 3 | 1 |
| Case 80 | 11 | 529,967     | 566,936     | 6 | 0 | 6 | 1 |
| Case 80 | 11 | 567,391     | 577,534     | 4 | 0 | 4 | 1 |
| Case 80 | 11 | 587,343     | 613,208     | 5 | 0 | 5 | 1 |
| Case 80 | 11 | 613,589     | 1,093,885   | 4 | 0 | 4 | 1 |
| Case 80 | 11 | 1,093,898   | 1,365,531   | 3 | 0 | 3 | 1 |
| Case 80 | 11 | 1,369,465   | 2,107,655   | 4 | 0 | 4 | 1 |
| Case 80 | 11 | 2,108,072   | 2,549,229   | 5 | 0 | 5 | 1 |
| Case 80 | 11 | 2,550,730   | 17,809,343  | 4 | 0 | 4 | 1 |
| Case 80 | 11 | 17,809,598  | 17,930,293  | 3 | 0 | 3 | 1 |
| Case 80 | 11 | 17,934,383  | 26,792,747  | 4 | 0 | 4 | 1 |
| Case 80 | 11 | 26,793,052  | 26,793,052  | 3 | 0 | 3 | 1 |
| Case 80 | 11 | 26,803,448  | 27,906,952  | 6 | 0 | 6 | 1 |
| Case 80 | 11 | 27,911,646  | 28,937,491  | 4 | 0 | 4 | 1 |
| Case 80 | 11 | 28,943,475  | 28,962,881  | 2 | 0 | 2 | 1 |
| Case 80 | 11 | 28,977,527  | 34,176,377  | 4 | 0 | 4 | 1 |
| Case 80 | 11 | 34,180,861  | 34,502,482  | 5 | 0 | 5 | 1 |
| Case 80 | 11 | 34,504,002  | 51,591,253  | 4 | 0 | 4 | 1 |
| Case 80 | 11 | 54,794,237  | 62,446,021  | 4 | 0 | 4 | 1 |
| Case 80 | 11 | 62,446,179  | 62,641,999  | 3 | 0 | 3 | 1 |
| Case 80 | 11 | 62,649,042  | 64,569,000  | 4 | 0 | 4 | 1 |
| Case 80 | 11 | 64,569,546  | 64,685,482  | 3 | 0 | 3 | 1 |
| Case 80 | 11 | 64,687,381  | 64,721,908  | 4 | 0 | 4 | 1 |
| Case 80 | 11 | 64,727,087  | 64,832,029  | 5 | 0 | 5 | 1 |
| Case 80 | 11 | 64,833,935  | 65,436,888  | 4 | 0 | 4 | 1 |
| Case 80 | 11 | 65,458,197  | 65,585,257  | 5 | 0 | 5 | 1 |
| Case 80 | 11 | 65,590,713  | 68,125,162  | 4 | 0 | 4 | 1 |
| Case 80 | 11 | 68,135,890  | 68,217,420  | 3 | 0 | 3 | 1 |
| Case 80 | 11 | 68,236,389  | 75,023,441  | 4 | 0 | 4 | 1 |
| Case 80 | 11 | 75,026,331  | 75,087,520  | 5 | 0 | 5 | 1 |
| Case 80 | 11 | 75,100,600  | 77,055,786  | 4 | 0 | 4 | 1 |
| Case 80 | 11 | 77,069,746  | 77,526,474  | 5 | 0 | 5 | 1 |
| Case 80 | 11 | 77,531,733  | 80,897,179  | 4 | 0 | 4 | 1 |
| Case 80 | 11 | 80,897,495  | 81,062,761  | 3 | 0 | 3 | 1 |
| Case 80 | 11 | 81,071,843  | 84,634,790  | 4 | 0 | 4 | 1 |
| Case 80 | 11 | 84,636,486  | 85,379,051  | 2 | 0 | 2 | 1 |
| Case 80 | 11 | 85,394,238  | 102,070,361 | 4 | 0 | 4 | 1 |
| Case 80 | 11 | 102,070,639 | 102,070,639 | 3 | 0 | 3 | 1 |
| Case 80 | 11 | 102,076,653 | 102,378,193 | 6 | 0 | 6 | 1 |

|         |    |             |             |   |   |   |   |
|---------|----|-------------|-------------|---|---|---|---|
| Case 80 | 11 | 102,378,560 | 118,332,517 | 4 | 0 | 4 | 1 |
| Case 80 | 11 | 118,341,921 | 118,579,747 | 5 | 0 | 5 | 1 |
| Case 80 | 11 | 118,610,463 | 128,234,772 | 4 | 0 | 4 | 1 |
| Case 80 | 11 | 128,236,936 | 128,354,720 | 5 | 0 | 5 | 1 |
| Case 80 | 11 | 128,354,820 | 134,934,063 | 4 | 0 | 4 | 1 |
| Case 80 | 12 | 191,619     | 7,985,752   | 3 | 1 | 4 | 0 |
| Case 80 | 12 | 7,987,761   | 8,097,404   | 3 | 2 | 5 | 0 |
| Case 80 | 12 | 8,097,433   | 12,837,819  | 3 | 1 | 4 | 0 |
| Case 80 | 12 | 12,841,735  | 13,358,206  | 2 | 2 | 4 | 0 |
| Case 80 | 12 | 13,361,316  | 13,482,712  | 3 | 2 | 5 | 0 |
| Case 80 | 12 | 13,485,340  | 13,721,148  | 2 | 2 | 4 | 0 |
| Case 80 | 12 | 13,722,275  | 14,008,506  | 3 | 2 | 5 | 0 |
| Case 80 | 12 | 14,012,006  | 14,214,636  | 3 | 1 | 4 | 0 |
| Case 80 | 12 | 14,229,229  | 14,488,914  | 4 | 1 | 5 | 0 |
| Case 80 | 12 | 14,517,338  | 26,945,413  | 3 | 1 | 4 | 0 |
| Case 80 | 12 | 26,946,854  | 27,070,646  | 4 | 1 | 5 | 0 |
| Case 80 | 12 | 27,083,360  | 34,245,756  | 3 | 1 | 4 | 0 |
| Case 80 | 12 | 34,263,134  | 34,460,029  | 3 | 0 | 3 | 1 |
| Case 80 | 12 | 34,506,279  | 34,853,011  | 2 | 1 | 3 | 0 |
| Case 80 | 12 | 37,876,400  | 38,416,139  | 2 | 1 | 3 | 0 |
| Case 80 | 12 | 38,424,982  | 45,115,634  | 3 | 1 | 4 | 0 |
| Case 80 | 12 | 45,149,102  | 45,239,637  | 3 | 0 | 3 | 1 |
| Case 80 | 12 | 45,249,956  | 49,728,427  | 3 | 1 | 4 | 0 |
| Case 80 | 12 | 49,735,340  | 50,306,148  | 2 | 2 | 4 | 0 |
| Case 80 | 12 | 50,316,439  | 51,870,386  | 3 | 1 | 4 | 0 |
| Case 80 | 12 | 51,878,672  | 52,057,660  | 3 | 2 | 5 | 0 |
| Case 80 | 12 | 52,060,359  | 52,204,246  | 3 | 0 | 3 | 1 |
| Case 80 | 12 | 52,211,617  | 52,859,985  | 3 | 2 | 5 | 0 |
| Case 80 | 12 | 52,862,614  | 55,805,647  | 3 | 1 | 4 | 0 |
| Case 80 | 12 | 55,815,369  | 56,138,430  | 4 | 1 | 5 | 0 |
| Case 80 | 12 | 56,140,027  | 56,331,777  | 3 | 1 | 4 | 0 |
| Case 80 | 12 | 56,333,210  | 56,561,241  | 4 | 1 | 5 | 0 |
| Case 80 | 12 | 56,563,563  | 56,824,665  | 3 | 1 | 4 | 0 |
| Case 80 | 12 | 56,825,311  | 56,952,878  | 4 | 1 | 5 | 0 |
| Case 80 | 12 | 56,956,213  | 71,507,561  | 3 | 1 | 4 | 0 |
| Case 80 | 12 | 71,519,116  | 71,551,461  | 4 | 1 | 5 | 0 |
| Case 80 | 12 | 71,566,754  | 80,083,520  | 3 | 1 | 4 | 0 |
| Case 80 | 12 | 80,083,954  | 80,101,106  | 3 | 0 | 3 | 1 |
| Case 80 | 12 | 80,108,416  | 100,139,334 | 3 | 1 | 4 | 0 |
| Case 80 | 12 | 100,152,136 | 100,293,070 | 3 | 0 | 3 | 1 |
| Case 80 | 12 | 100,300,029 | 115,629,903 | 3 | 1 | 4 | 0 |
| Case 80 | 12 | 115,634,875 | 115,959,064 | 2 | 2 | 4 | 0 |
| Case 80 | 12 | 115,959,934 | 118,649,954 | 3 | 1 | 4 | 0 |
| Case 80 | 12 | 118,664,823 | 118,712,413 | 3 | 0 | 3 | 1 |
| Case 80 | 12 | 118,735,685 | 121,371,233 | 3 | 1 | 4 | 0 |
| Case 80 | 12 | 121,384,680 | 121,668,684 | 4 | 1 | 5 | 0 |
| Case 80 | 12 | 121,669,145 | 121,982,892 | 3 | 1 | 4 | 0 |
| Case 80 | 12 | 121,983,465 | 125,297,424 | 4 | 1 | 5 | 0 |
| Case 80 | 12 | 125,298,855 | 125,298,877 | 3 | 1 | 4 | 0 |
| Case 80 | 12 | 125,299,542 | 125,299,614 | 2 | 1 | 3 | 0 |
| Case 80 | 12 | 125,299,830 | 125,332,955 | 2 | 0 | 2 | 1 |
| Case 80 | 12 | 125,335,950 | 125,335,950 | 3 | 0 | 3 | 1 |
| Case 80 | 12 | 125,341,870 | 125,344,465 | 3 | 1 | 4 | 0 |
| Case 80 | 12 | 125,351,116 | 132,425,971 | 4 | 1 | 5 | 0 |
| Case 80 | 12 | 132,426,218 | 132,626,395 | 3 | 1 | 4 | 0 |
| Case 80 | 12 | 132,626,425 | 133,237,641 | 4 | 1 | 5 | 0 |
| Case 80 | 12 | 133,238,076 | 133,245,483 | 3 | 1 | 4 | 0 |
| Case 80 | 12 | 133,249,254 | 133,254,193 | 2 | 1 | 3 | 0 |
| Case 80 | 12 | 133,256,218 | 133,281,462 | 2 | 0 | 2 | 1 |
| Case 80 | 12 | 133,286,192 | 133,286,192 | 3 | 0 | 3 | 1 |
| Case 80 | 12 | 133,286,894 | 133,291,879 | 3 | 1 | 4 | 0 |



|         |    |             |             |   |   |   |   |
|---------|----|-------------|-------------|---|---|---|---|
| Case 80 | 12 | 133,295,353 | 133,810,935 | 4 | 1 | 5 | 0 |
| Case 80 | 13 | 19,058,717  | 27,386,655  | 2 | 2 | 4 | 0 |
| Case 80 | 13 | 27,387,857  | 27,444,933  | 4 | 2 | 6 | 0 |
| Case 80 | 13 | 27,445,339  | 27,445,339  | 4 | 0 | 4 | 1 |
| Case 80 | 13 | 27,445,373  | 27,598,826  | 6 | 1 | 7 | 0 |
| Case 80 | 13 | 27,599,149  | 27,599,149  | 4 | 0 | 4 | 1 |
| Case 80 | 13 | 27,600,884  | 27,629,806  | 4 | 2 | 6 | 0 |
| Case 80 | 13 | 27,641,693  | 31,060,704  | 2 | 2 | 4 | 0 |
| Case 80 | 13 | 31,071,237  | 37,139,947  | 3 | 2 | 5 | 0 |
| Case 80 | 13 | 37,144,848  | 40,477,624  | 2 | 1 | 3 | 0 |
| Case 80 | 13 | 40,480,447  | 41,193,475  | 2 | 2 | 4 | 0 |
| Case 80 | 13 | 41,194,032  | 41,340,912  | 2 | 1 | 3 | 0 |
| Case 80 | 13 | 41,340,992  | 41,387,996  | 3 | 0 | 3 | 1 |
| Case 80 | 13 | 41,390,881  | 42,569,709  | 2 | 1 | 3 | 0 |
| Case 80 | 13 | 42,570,201  | 42,759,416  | 2 | 2 | 4 | 0 |
| Case 80 | 13 | 42,761,201  | 42,953,077  | 2 | 1 | 3 | 0 |
| Case 80 | 13 | 42,956,463  | 43,462,422  | 2 | 2 | 4 | 0 |
| Case 80 | 13 | 43,462,597  | 44,236,212  | 2 | 1 | 3 | 0 |
| Case 80 | 13 | 44,236,266  | 44,394,588  | 2 | 2 | 4 | 0 |
| Case 80 | 13 | 44,394,894  | 44,499,013  | 3 | 0 | 3 | 1 |
| Case 80 | 13 | 44,507,689  | 51,854,595  | 3 | 2 | 5 | 0 |
| Case 80 | 13 | 51,854,668  | 51,977,205  | 2 | 2 | 4 | 0 |
| Case 80 | 13 | 51,987,718  | 52,477,005  | 3 | 2 | 5 | 0 |
| Case 80 | 13 | 52,478,985  | 53,049,113  | 2 | 2 | 4 | 0 |
| Case 80 | 13 | 53,049,198  | 53,397,564  | 3 | 2 | 5 | 0 |
| Case 80 | 13 | 53,397,648  | 53,436,517  | 2 | 2 | 4 | 0 |
| Case 80 | 13 | 53,441,955  | 53,729,815  | 4 | 2 | 6 | 0 |
| Case 80 | 13 | 53,736,594  | 54,659,312  | 3 | 2 | 5 | 0 |
| Case 80 | 13 | 54,660,744  | 55,104,771  | 2 | 2 | 4 | 0 |
| Case 80 | 13 | 55,107,650  | 60,256,759  | 3 | 2 | 5 | 0 |
| Case 80 | 13 | 60,261,966  | 60,744,965  | 2 | 2 | 4 | 0 |
| Case 80 | 13 | 60,770,022  | 61,409,805  | 3 | 2 | 5 | 0 |
| Case 80 | 13 | 61,410,191  | 61,989,175  | 2 | 2 | 4 | 0 |
| Case 80 | 13 | 61,992,808  | 64,198,933  | 3 | 2 | 5 | 0 |
| Case 80 | 13 | 64,202,642  | 65,123,573  | 2 | 2 | 4 | 0 |
| Case 80 | 13 | 65,124,700  | 66,176,167  | 3 | 2 | 5 | 0 |
| Case 80 | 13 | 66,181,960  | 66,284,987  | 2 | 2 | 4 | 0 |
| Case 80 | 13 | 66,286,953  | 67,646,563  | 3 | 2 | 5 | 0 |
| Case 80 | 13 | 67,649,864  | 67,838,330  | 2 | 2 | 4 | 0 |
| Case 80 | 13 | 67,842,588  | 73,653,881  | 3 | 2 | 5 | 0 |
| Case 80 | 13 | 73,655,211  | 74,115,700  | 3 | 3 | 6 | 0 |
| Case 80 | 13 | 74,125,798  | 74,213,538  | 5 | 0 | 5 | 1 |
| Case 80 | 13 | 74,220,779  | 75,777,862  | 3 | 0 | 3 | 1 |
| Case 80 | 13 | 75,786,813  | 75,842,148  | 4 | 0 | 4 | 1 |
| Case 80 | 13 | 75,847,299  | 95,258,830  | 3 | 0 | 3 | 1 |
| Case 80 | 13 | 95,258,944  | 95,258,944  | 4 | 0 | 4 | 1 |
| Case 80 | 13 | 95,262,116  | 95,508,061  | 2 | 0 | 2 | 1 |
| Case 80 | 13 | 95,513,006  | 96,410,115  | 4 | 0 | 4 | 1 |
| Case 80 | 13 | 96,413,062  | 98,994,030  | 2 | 0 | 2 | 1 |
| Case 80 | 13 | 98,996,101  | 99,120,484  | 3 | 0 | 3 | 1 |
| Case 80 | 13 | 99,122,373  | 99,315,652  | 4 | 0 | 4 | 1 |
| Case 80 | 13 | 99,315,793  | 99,462,510  | 3 | 0 | 3 | 1 |
| Case 80 | 13 | 99,468,479  | 99,468,479  | 4 | 0 | 4 | 1 |
| Case 80 | 13 | 99,469,134  | 99,783,668  | 2 | 0 | 2 | 1 |
| Case 80 | 13 | 99,787,021  | 99,919,905  | 4 | 0 | 4 | 1 |
| Case 80 | 13 | 99,932,922  | 105,019,939 | 3 | 0 | 3 | 1 |
| Case 80 | 13 | 105,022,220 | 111,745,599 | 3 | 2 | 5 | 0 |
| Case 80 | 13 | 111,746,149 | 114,318,239 | 2 | 2 | 4 | 0 |
| Case 80 | 13 | 114,321,711 | 114,834,589 | 3 | 2 | 5 | 0 |
| Case 80 | 13 | 114,835,802 | 115,103,529 | 2 | 2 | 4 | 0 |
| Case 80 | 14 | 19,280,733  | 22,590,996  | 3 | 0 | 3 | 1 |

|         |    |             |             |   |   |   |   |
|---------|----|-------------|-------------|---|---|---|---|
| Case 80 | 14 | 22,591,988  | 22,859,482  | 4 | 0 | 4 | 1 |
| Case 80 | 14 | 22,861,516  | 22,963,646  | 5 | 0 | 5 | 1 |
| Case 80 | 14 | 22,964,782  | 23,393,856  | 4 | 0 | 4 | 1 |
| Case 80 | 14 | 23,395,991  | 26,364,940  | 3 | 0 | 3 | 1 |
| Case 80 | 14 | 26,370,860  | 27,402,506  | 4 | 0 | 4 | 1 |
| Case 80 | 14 | 27,402,787  | 27,863,056  | 3 | 0 | 3 | 1 |
| Case 80 | 14 | 27,870,844  | 28,235,034  | 4 | 0 | 4 | 1 |
| Case 80 | 14 | 28,253,075  | 28,837,771  | 3 | 0 | 3 | 1 |
| Case 80 | 14 | 28,844,064  | 28,887,520  | 1 | 0 | 1 | 0 |
| Case 80 | 14 | 28,909,201  | 31,532,203  | 3 | 0 | 3 | 1 |
| Case 80 | 14 | 31,534,471  | 31,819,913  | 4 | 0 | 4 | 1 |
| Case 80 | 14 | 31,828,110  | 35,860,074  | 3 | 0 | 3 | 1 |
| Case 80 | 14 | 35,862,404  | 36,004,539  | 4 | 0 | 4 | 1 |
| Case 80 | 14 | 36,004,546  | 38,180,813  | 3 | 0 | 3 | 1 |
| Case 80 | 14 | 38,185,661  | 38,234,632  | 1 | 0 | 1 | 0 |
| Case 80 | 14 | 38,246,440  | 42,552,103  | 3 | 0 | 3 | 1 |
| Case 80 | 14 | 42,554,430  | 45,606,387  | 4 | 0 | 4 | 1 |
| Case 80 | 14 | 45,618,040  | 45,642,394  | 3 | 0 | 3 | 1 |
| Case 80 | 14 | 45,644,409  | 45,646,104  | 1 | 0 | 1 | 0 |
| Case 80 | 14 | 45,650,888  | 45,651,681  | 3 | 0 | 3 | 1 |
| Case 80 | 14 | 45,651,965  | 45,651,965  | 2 | 1 | 3 | 0 |
| Case 80 | 14 | 45,654,467  | 45,693,341  | 2 | 0 | 2 | 1 |
| Case 80 | 14 | 45,693,605  | 45,719,643  | 4 | 0 | 4 | 1 |
| Case 80 | 14 | 45,734,497  | 45,977,692  | 2 | 0 | 2 | 1 |
| Case 80 | 14 | 45,987,005  | 46,669,683  | 3 | 0 | 3 | 1 |
| Case 80 | 14 | 46,674,244  | 61,886,406  | 4 | 0 | 4 | 1 |
| Case 80 | 14 | 61,887,477  | 62,196,948  | 5 | 0 | 5 | 1 |
| Case 80 | 14 | 62,197,298  | 65,008,151  | 4 | 0 | 4 | 1 |
| Case 80 | 14 | 65,008,251  | 65,406,238  | 5 | 0 | 5 | 1 |
| Case 80 | 14 | 65,406,279  | 65,617,884  | 4 | 0 | 4 | 1 |
| Case 80 | 14 | 65,618,655  | 65,884,212  | 5 | 0 | 5 | 1 |
| Case 80 | 14 | 65,885,275  | 68,454,505  | 4 | 0 | 4 | 1 |
| Case 80 | 14 | 68,480,984  | 68,765,724  | 5 | 0 | 5 | 1 |
| Case 80 | 14 | 68,767,972  | 73,894,496  | 4 | 0 | 4 | 1 |
| Case 80 | 14 | 73,925,895  | 88,623,625  | 3 | 0 | 3 | 1 |
| Case 80 | 14 | 88,624,270  | 88,823,655  | 4 | 0 | 4 | 1 |
| Case 80 | 14 | 88,825,490  | 91,005,443  | 3 | 0 | 3 | 1 |
| Case 80 | 14 | 91,007,828  | 91,773,568  | 4 | 0 | 4 | 1 |
| Case 80 | 14 | 91,774,732  | 92,013,263  | 3 | 0 | 3 | 1 |
| Case 80 | 14 | 92,032,755  | 92,066,554  | 1 | 0 | 1 | 0 |
| Case 80 | 14 | 92,070,607  | 92,682,604  | 3 | 0 | 3 | 1 |
| Case 80 | 14 | 92,684,157  | 93,019,511  | 4 | 0 | 4 | 1 |
| Case 80 | 14 | 93,022,148  | 93,127,184  | 3 | 0 | 3 | 1 |
| Case 80 | 14 | 93,127,411  | 93,532,014  | 4 | 0 | 4 | 1 |
| Case 80 | 14 | 93,536,969  | 95,462,477  | 3 | 0 | 3 | 1 |
| Case 80 | 14 | 95,469,906  | 96,379,833  | 4 | 0 | 4 | 1 |
| Case 80 | 14 | 96,381,342  | 97,075,308  | 3 | 0 | 3 | 1 |
| Case 80 | 14 | 97,076,516  | 97,198,156  | 4 | 0 | 4 | 1 |
| Case 80 | 14 | 97,198,314  | 105,063,342 | 3 | 0 | 3 | 1 |
| Case 80 | 14 | 105,065,970 | 105,233,095 | 4 | 0 | 4 | 1 |
| Case 80 | 14 | 105,236,685 | 107,287,663 | 3 | 0 | 3 | 1 |
| Case 80 | 15 | 20,034,919  | 25,602,950  | 2 | 2 | 4 | 0 |
| Case 80 | 15 | 25,616,494  | 25,803,609  | 3 | 0 | 3 | 1 |
| Case 80 | 15 | 25,808,285  | 31,821,835  | 2 | 2 | 4 | 0 |
| Case 80 | 15 | 31,822,215  | 32,350,775  | 3 | 2 | 5 | 0 |
| Case 80 | 15 | 32,355,947  | 33,101,473  | 2 | 2 | 4 | 0 |
| Case 80 | 15 | 33,103,170  | 33,856,012  | 3 | 2 | 5 | 0 |
| Case 80 | 15 | 33,858,675  | 35,135,007  | 2 | 2 | 4 | 0 |
| Case 80 | 15 | 35,141,453  | 36,656,303  | 3 | 2 | 5 | 0 |
| Case 80 | 15 | 36,656,703  | 36,879,892  | 2 | 2 | 4 | 0 |
| Case 80 | 15 | 36,880,618  | 38,698,617  | 3 | 2 | 5 | 0 |

|         |    |             |             |   |   |   |   |
|---------|----|-------------|-------------|---|---|---|---|
| Case 80 | 15 | 38,711,486  | 38,990,598  | 2 | 2 | 4 | 0 |
| Case 80 | 15 | 38,990,769  | 39,224,334  | 3 | 2 | 5 | 0 |
| Case 80 | 15 | 39,228,122  | 45,156,734  | 2 | 2 | 4 | 0 |
| Case 80 | 15 | 45,202,919  | 45,358,846  | 4 | 2 | 6 | 0 |
| Case 80 | 15 | 45,361,227  | 46,748,538  | 3 | 2 | 5 | 0 |
| Case 80 | 15 | 46,749,422  | 47,280,655  | 2 | 2 | 4 | 0 |
| Case 80 | 15 | 47,282,507  | 48,013,174  | 3 | 2 | 5 | 0 |
| Case 80 | 15 | 48,015,116  | 48,819,502  | 2 | 2 | 4 | 0 |
| Case 80 | 15 | 48,822,627  | 50,946,761  | 3 | 2 | 5 | 0 |
| Case 80 | 15 | 50,952,910  | 51,546,298  | 2 | 2 | 4 | 0 |
| Case 80 | 15 | 51,548,310  | 52,188,668  | 3 | 2 | 5 | 0 |
| Case 80 | 15 | 52,194,469  | 53,270,480  | 2 | 2 | 4 | 0 |
| Case 80 | 15 | 53,272,273  | 53,575,652  | 3 | 2 | 5 | 0 |
| Case 80 | 15 | 53,576,499  | 54,075,546  | 2 | 2 | 4 | 0 |
| Case 80 | 15 | 54,080,919  | 55,456,510  | 3 | 2 | 5 | 0 |
| Case 80 | 15 | 55,456,922  | 56,208,476  | 2 | 2 | 4 | 0 |
| Case 80 | 15 | 56,208,534  | 57,762,793  | 3 | 2 | 5 | 0 |
| Case 80 | 15 | 57,763,464  | 58,173,651  | 2 | 2 | 4 | 0 |
| Case 80 | 15 | 58,174,806  | 58,738,760  | 3 | 2 | 5 | 0 |
| Case 80 | 15 | 58,739,646  | 59,430,501  | 2 | 2 | 4 | 0 |
| Case 80 | 15 | 59,445,894  | 60,002,617  | 4 | 2 | 6 | 0 |
| Case 80 | 15 | 60,014,228  | 60,210,305  | 3 | 2 | 5 | 0 |
| Case 80 | 15 | 60,214,996  | 61,855,340  | 2 | 2 | 4 | 0 |
| Case 80 | 15 | 61,856,952  | 62,269,312  | 3 | 2 | 5 | 0 |
| Case 80 | 15 | 62,269,392  | 62,283,887  | 2 | 2 | 4 | 0 |
| Case 80 | 15 | 62,300,870  | 62,546,057  | 4 | 2 | 6 | 0 |
| Case 80 | 15 | 62,550,257  | 64,005,783  | 2 | 2 | 4 | 0 |
| Case 80 | 15 | 64,011,104  | 64,762,593  | 3 | 2 | 5 | 0 |
| Case 80 | 15 | 64,771,307  | 65,937,992  | 2 | 2 | 4 | 0 |
| Case 80 | 15 | 65,940,663  | 66,392,461  | 4 | 2 | 6 | 0 |
| Case 80 | 15 | 66,392,896  | 68,028,989  | 2 | 2 | 4 | 0 |
| Case 80 | 15 | 68,034,150  | 68,499,321  | 3 | 2 | 5 | 0 |
| Case 80 | 15 | 68,499,788  | 69,714,049  | 2 | 2 | 4 | 0 |
| Case 80 | 15 | 69,714,068  | 70,034,088  | 3 | 2 | 5 | 0 |
| Case 80 | 15 | 70,037,839  | 70,754,781  | 2 | 2 | 4 | 0 |
| Case 80 | 15 | 70,755,494  | 70,971,971  | 4 | 2 | 6 | 0 |
| Case 80 | 15 | 70,972,015  | 71,731,155  | 3 | 2 | 5 | 0 |
| Case 80 | 15 | 71,734,221  | 76,254,311  | 2 | 2 | 4 | 0 |
| Case 80 | 15 | 76,260,430  | 76,474,217  | 3 | 2 | 5 | 0 |
| Case 80 | 15 | 76,474,260  | 85,227,636  | 2 | 2 | 4 | 0 |
| Case 80 | 15 | 85,251,713  | 85,326,313  | 4 | 2 | 6 | 0 |
| Case 80 | 15 | 85,326,594  | 85,327,966  | 3 | 3 | 6 | 0 |
| Case 80 | 15 | 85,330,745  | 85,583,088  | 4 | 3 | 7 | 0 |
| Case 80 | 15 | 85,590,642  | 86,427,595  | 2 | 2 | 4 | 0 |
| Case 80 | 15 | 86,428,257  | 87,748,661  | 3 | 2 | 5 | 0 |
| Case 80 | 15 | 87,750,602  | 90,142,672  | 2 | 2 | 4 | 0 |
| Case 80 | 15 | 90,144,615  | 90,213,343  | 3 | 2 | 5 | 0 |
| Case 80 | 15 | 90,213,364  | 90,213,364  | 2 | 2 | 4 | 0 |
| Case 80 | 15 | 90,213,451  | 91,347,463  | 4 | 2 | 6 | 0 |
| Case 80 | 15 | 91,351,930  | 91,557,034  | 3 | 2 | 5 | 0 |
| Case 80 | 15 | 91,557,071  | 99,664,045  | 4 | 2 | 6 | 0 |
| Case 80 | 15 | 99,666,329  | 99,758,815  | 3 | 2 | 5 | 0 |
| Case 80 | 15 | 99,758,857  | 99,759,129  | 2 | 2 | 4 | 0 |
| Case 80 | 15 | 99,759,194  | 100,589,191 | 4 | 2 | 6 | 0 |
| Case 80 | 15 | 100,591,794 | 101,041,964 | 3 | 2 | 5 | 0 |
| Case 80 | 15 | 101,044,929 | 101,045,079 | 2 | 2 | 4 | 0 |
| Case 80 | 15 | 101,052,430 | 101,420,155 | 4 | 2 | 6 | 0 |
| Case 80 | 15 | 101,421,673 | 102,104,049 | 3 | 2 | 5 | 0 |
| Case 80 | 15 | 102,104,694 | 102,461,162 | 4 | 2 | 6 | 0 |
| Case 80 | 16 | 88,165      | 397,044     | 3 | 0 | 3 | 1 |
| Case 80 | 16 | 407,800     | 422,262     | 3 | 1 | 4 | 0 |

|         |    |            |            |   |   |   |   |
|---------|----|------------|------------|---|---|---|---|
| Case 80 | 16 | 424,005    | 580,124    | 3 | 0 | 3 | 1 |
| Case 80 | 16 | 591,586    | 591,586    | 4 | 0 | 4 | 1 |
| Case 80 | 16 | 593,277    | 685,708    | 2 | 0 | 2 | 1 |
| Case 80 | 16 | 697,443    | 11,773,743 | 3 | 0 | 3 | 1 |
| Case 80 | 16 | 11,780,655 | 11,846,231 | 4 | 0 | 4 | 1 |
| Case 80 | 16 | 11,846,508 | 11,846,508 | 3 | 0 | 3 | 1 |
| Case 80 | 16 | 11,846,619 | 11,970,882 | 6 | 0 | 6 | 1 |
| Case 80 | 16 | 11,976,414 | 12,040,511 | 4 | 0 | 4 | 1 |
| Case 80 | 16 | 12,043,512 | 16,100,513 | 3 | 0 | 3 | 1 |
| Case 80 | 16 | 16,100,560 | 16,142,079 | 1 | 0 | 1 | 0 |
| Case 80 | 16 | 16,142,358 | 16,152,940 | 0 | 0 | 0 | 0 |
| Case 80 | 16 | 16,155,103 | 28,608,487 | 3 | 0 | 3 | 1 |
| Case 80 | 16 | 28,615,243 | 28,620,752 | 0 | 0 | 0 | 0 |
| Case 80 | 16 | 28,628,143 | 35,285,582 | 3 | 0 | 3 | 1 |
| Case 80 | 16 | 46,450,037 | 50,587,976 | 3 | 0 | 3 | 1 |
| Case 80 | 16 | 50,600,877 | 50,811,118 | 4 | 0 | 4 | 1 |
| Case 80 | 16 | 50,815,188 | 68,282,077 | 3 | 0 | 3 | 1 |
| Case 80 | 16 | 68,289,186 | 68,613,106 | 4 | 0 | 4 | 1 |
| Case 80 | 16 | 68,624,373 | 69,424,499 | 3 | 0 | 3 | 1 |
| Case 80 | 16 | 69,429,147 | 69,474,517 | 4 | 0 | 4 | 1 |
| Case 80 | 16 | 69,481,071 | 70,843,909 | 3 | 0 | 3 | 1 |
| Case 80 | 16 | 70,867,880 | 71,171,147 | 3 | 1 | 4 | 0 |
| Case 80 | 16 | 71,174,886 | 78,187,903 | 3 | 0 | 3 | 1 |
| Case 80 | 16 | 78,190,218 | 78,265,836 | 1 | 0 | 1 | 0 |
| Case 80 | 16 | 78,267,097 | 85,531,362 | 3 | 0 | 3 | 1 |
| Case 80 | 16 | 85,536,550 | 85,774,917 | 4 | 0 | 4 | 1 |
| Case 80 | 16 | 85,790,981 | 87,802,776 | 3 | 0 | 3 | 1 |
| Case 80 | 16 | 87,808,697 | 87,854,337 | 4 | 0 | 4 | 1 |
| Case 80 | 16 | 87,854,410 | 89,805,074 | 3 | 0 | 3 | 1 |
| Case 80 | 16 | 89,805,301 | 90,103,117 | 5 | 0 | 5 | 1 |
| Case 80 | 16 | 90,103,659 | 90,274,695 | 3 | 0 | 3 | 1 |
| Case 80 | 17 | 11,885     | 978,653    | 3 | 0 | 3 | 1 |
| Case 80 | 17 | 981,612    | 17,722,470 | 4 | 0 | 4 | 1 |
| Case 80 | 17 | 17,722,503 | 18,099,962 | 5 | 0 | 5 | 1 |
| Case 80 | 17 | 18,103,907 | 22,242,355 | 4 | 0 | 4 | 1 |
| Case 80 | 17 | 25,268,142 | 25,765,540 | 4 | 0 | 4 | 1 |
| Case 80 | 17 | 25,768,404 | 26,337,703 | 5 | 0 | 5 | 1 |
| Case 80 | 17 | 26,349,998 | 34,436,708 | 4 | 0 | 4 | 1 |
| Case 80 | 17 | 34,443,811 | 34,476,396 | 4 | 2 | 6 | 0 |
| Case 80 | 17 | 34,597,521 | 37,767,453 | 4 | 0 | 4 | 1 |
| Case 80 | 17 | 37,771,064 | 37,829,392 | 5 | 0 | 5 | 1 |
| Case 80 | 17 | 37,829,460 | 37,831,035 | 4 | 0 | 4 | 1 |
| Case 80 | 17 | 37,832,366 | 38,073,390 | 5 | 1 | 6 | 0 |
| Case 80 | 17 | 38,073,536 | 40,498,273 | 4 | 0 | 4 | 1 |
| Case 80 | 17 | 40,499,533 | 40,737,170 | 5 | 0 | 5 | 1 |
| Case 80 | 17 | 40,737,178 | 48,539,997 | 4 | 0 | 4 | 1 |
| Case 80 | 17 | 48,540,868 | 48,725,604 | 5 | 0 | 5 | 1 |
| Case 80 | 17 | 48,728,583 | 48,883,131 | 4 | 0 | 4 | 1 |
| Case 80 | 17 | 48,883,834 | 49,052,278 | 5 | 0 | 5 | 1 |
| Case 80 | 17 | 49,060,008 | 55,781,270 | 4 | 0 | 4 | 1 |
| Case 80 | 17 | 55,783,487 | 56,085,257 | 5 | 0 | 5 | 1 |
| Case 80 | 17 | 56,085,439 | 57,196,822 | 4 | 0 | 4 | 1 |
| Case 80 | 17 | 57,206,124 | 57,335,131 | 3 | 0 | 3 | 1 |
| Case 80 | 17 | 57,354,718 | 62,764,047 | 4 | 0 | 4 | 1 |
| Case 80 | 17 | 62,773,261 | 72,350,663 | 3 | 0 | 3 | 1 |
| Case 80 | 17 | 72,350,664 | 73,816,446 | 4 | 0 | 4 | 1 |
| Case 80 | 17 | 73,816,844 | 73,836,181 | 5 | 0 | 5 | 1 |
| Case 80 | 17 | 73,836,317 | 73,873,394 | 4 | 0 | 4 | 1 |
| Case 80 | 17 | 73,873,656 | 73,975,075 | 5 | 0 | 5 | 1 |
| Case 80 | 17 | 73,975,139 | 78,054,102 | 4 | 0 | 4 | 1 |
| Case 80 | 17 | 78,055,455 | 78,162,296 | 5 | 0 | 5 | 1 |

|         |    |            |            |   |   |   |   |
|---------|----|------------|------------|---|---|---|---|
| Case 80 | 17 | 78,162,327 | 79,171,929 | 4 | 0 | 4 | 1 |
| Case 80 | 17 | 79,171,959 | 79,532,654 | 3 | 0 | 3 | 1 |
| Case 80 | 17 | 79,539,043 | 79,993,212 | 4 | 0 | 4 | 1 |
| Case 80 | 17 | 79,993,919 | 81,060,040 | 5 | 0 | 5 | 1 |
| Case 80 | 18 | 87,505     | 2,089,892  | 4 | 0 | 4 | 1 |
| Case 80 | 18 | 2,094,574  | 2,462,400  | 5 | 0 | 5 | 1 |
| Case 80 | 18 | 2,463,095  | 3,534,608  | 4 | 0 | 4 | 1 |
| Case 80 | 18 | 3,547,523  | 3,776,564  | 6 | 1 | 7 | 0 |
| Case 80 | 18 | 3,777,899  | 3,970,124  | 4 | 0 | 4 | 1 |
| Case 80 | 18 | 3,971,115  | 4,390,081  | 5 | 0 | 5 | 1 |
| Case 80 | 18 | 4,394,577  | 6,433,650  | 4 | 0 | 4 | 1 |
| Case 80 | 18 | 6,437,844  | 6,868,155  | 5 | 0 | 5 | 1 |
| Case 80 | 18 | 6,868,925  | 15,375,878 | 4 | 0 | 4 | 1 |
| Case 80 | 18 | 18,520,354 | 19,237,108 | 4 | 0 | 4 | 1 |
| Case 80 | 18 | 19,239,275 | 19,239,275 | 5 | 0 | 5 | 1 |
| Case 80 | 18 | 19,243,664 | 19,282,394 | 5 | 1 | 6 | 0 |
| Case 80 | 18 | 19,283,564 | 19,283,564 | 5 | 0 | 5 | 1 |
| Case 80 | 18 | 19,284,592 | 20,002,116 | 4 | 0 | 4 | 1 |
| Case 80 | 18 | 20,003,666 | 20,484,640 | 5 | 0 | 5 | 1 |
| Case 80 | 18 | 20,494,552 | 22,136,830 | 4 | 0 | 4 | 1 |
| Case 80 | 18 | 22,137,319 | 22,588,929 | 5 | 0 | 5 | 1 |
| Case 80 | 18 | 22,595,550 | 25,957,703 | 4 | 0 | 4 | 1 |
| Case 80 | 18 | 25,958,880 | 26,425,451 | 5 | 0 | 5 | 1 |
| Case 80 | 18 | 26,426,397 | 28,182,328 | 4 | 0 | 4 | 1 |
| Case 80 | 18 | 28,183,475 | 28,560,707 | 5 | 0 | 5 | 1 |
| Case 80 | 18 | 28,562,333 | 30,030,605 | 4 | 0 | 4 | 1 |
| Case 80 | 18 | 30,035,903 | 30,414,984 | 5 | 0 | 5 | 1 |
| Case 80 | 18 | 30,415,062 | 34,058,015 | 4 | 0 | 4 | 1 |
| Case 80 | 18 | 34,064,970 | 34,587,096 | 3 | 0 | 3 | 1 |
| Case 80 | 18 | 34,630,103 | 37,135,323 | 4 | 0 | 4 | 1 |
| Case 80 | 18 | 37,141,201 | 37,304,966 | 3 | 0 | 3 | 1 |
| Case 80 | 18 | 37,340,664 | 41,152,727 | 4 | 0 | 4 | 1 |
| Case 80 | 18 | 41,155,806 | 43,028,130 | 5 | 0 | 5 | 1 |
| Case 80 | 18 | 43,030,953 | 59,896,321 | 4 | 0 | 4 | 1 |
| Case 80 | 18 | 59,896,965 | 59,942,691 | 2 | 0 | 2 | 1 |
| Case 80 | 18 | 59,947,118 | 78,015,180 | 3 | 0 | 3 | 1 |
| Case 80 | 19 | 260,912    | 409,977    | 3 | 0 | 3 | 1 |
| Case 80 | 19 | 416,963    | 661,080    | 4 | 0 | 4 | 1 |
| Case 80 | 19 | 663,929    | 2,191,238  | 3 | 0 | 3 | 1 |
| Case 80 | 19 | 2,194,896  | 2,487,858  | 4 | 0 | 4 | 1 |
| Case 80 | 19 | 2,491,658  | 2,528,705  | 3 | 0 | 3 | 1 |
| Case 80 | 19 | 2,532,725  | 2,650,034  | 4 | 0 | 4 | 1 |
| Case 80 | 19 | 2,657,397  | 4,014,065  | 3 | 0 | 3 | 1 |
| Case 80 | 19 | 4,024,020  | 4,045,962  | 1 | 0 | 1 | 0 |
| Case 80 | 19 | 4,049,550  | 10,526,009 | 3 | 0 | 3 | 1 |
| Case 80 | 19 | 10,537,268 | 12,812,982 | 2 | 2 | 4 | 0 |
| Case 80 | 19 | 12,813,683 | 12,883,020 | 3 | 2 | 5 | 0 |
| Case 80 | 19 | 12,883,026 | 13,873,698 | 2 | 2 | 4 | 0 |
| Case 80 | 19 | 13,873,793 | 14,115,718 | 3 | 2 | 5 | 0 |
| Case 80 | 19 | 14,130,215 | 14,143,016 | 3 | 0 | 3 | 1 |
| Case 80 | 19 | 14,147,263 | 24,629,285 | 2 | 2 | 4 | 0 |
| Case 80 | 19 | 27,732,159 | 29,898,187 | 2 | 2 | 4 | 0 |
| Case 80 | 19 | 29,901,465 | 30,539,739 | 4 | 2 | 6 | 0 |
| Case 80 | 19 | 30,546,184 | 39,727,668 | 2 | 2 | 4 | 0 |
| Case 80 | 19 | 39,729,479 | 39,880,133 | 3 | 2 | 5 | 0 |
| Case 80 | 19 | 39,882,034 | 39,955,643 | 2 | 2 | 4 | 0 |
| Case 80 | 19 | 39,955,791 | 40,095,901 | 3 | 2 | 5 | 0 |
| Case 80 | 19 | 40,095,924 | 41,120,305 | 2 | 2 | 4 | 0 |
| Case 80 | 19 | 41,122,891 | 41,166,954 | 3 | 2 | 5 | 0 |
| Case 80 | 19 | 41,168,196 | 42,085,722 | 2 | 2 | 4 | 0 |
| Case 80 | 19 | 42,085,873 | 42,407,872 | 4 | 2 | 6 | 0 |

|         |    |            |            |   |   |   |   |
|---------|----|------------|------------|---|---|---|---|
| Case 80 | 19 | 42,408,188 | 44,207,318 | 2 | 2 | 4 | 0 |
| Case 80 | 19 | 44,213,380 | 44,226,127 | 3 | 2 | 5 | 0 |
| Case 80 | 19 | 44,232,736 | 44,470,147 | 4 | 2 | 6 | 0 |
| Case 80 | 19 | 44,470,165 | 44,515,541 | 3 | 2 | 5 | 0 |
| Case 80 | 19 | 44,516,964 | 44,574,700 | 3 | 3 | 6 | 0 |
| Case 80 | 19 | 44,575,720 | 44,932,972 | 3 | 2 | 5 | 0 |
| Case 80 | 19 | 44,932,979 | 46,112,907 | 2 | 2 | 4 | 0 |
| Case 80 | 19 | 46,116,477 | 46,439,321 | 4 | 2 | 6 | 0 |
| Case 80 | 19 | 46,440,300 | 48,846,689 | 2 | 2 | 4 | 0 |
| Case 80 | 19 | 48,848,274 | 49,020,315 | 3 | 2 | 5 | 0 |
| Case 80 | 19 | 49,027,683 | 49,196,722 | 5 | 2 | 7 | 0 |
| Case 80 | 19 | 49,202,859 | 49,206,818 | 3 | 2 | 5 | 0 |
| Case 80 | 19 | 49,206,862 | 49,207,095 | 2 | 2 | 4 | 0 |
| Case 80 | 19 | 49,207,206 | 49,465,960 | 4 | 2 | 6 | 0 |
| Case 80 | 19 | 49,472,745 | 49,564,124 | 3 | 2 | 5 | 0 |
| Case 80 | 19 | 49,564,629 | 49,925,667 | 3 | 1 | 4 | 0 |
| Case 80 | 19 | 49,926,493 | 49,971,816 | 3 | 0 | 3 | 1 |
| Case 80 | 19 | 49,972,172 | 50,164,390 | 3 | 1 | 4 | 0 |
| Case 80 | 19 | 50,164,569 | 50,549,304 | 2 | 1 | 3 | 0 |
| Case 80 | 19 | 50,549,441 | 50,754,695 | 3 | 1 | 4 | 0 |
| Case 80 | 19 | 50,755,956 | 51,013,325 | 2 | 1 | 3 | 0 |
| Case 80 | 19 | 51,013,965 | 52,529,074 | 3 | 1 | 4 | 0 |
| Case 80 | 19 | 52,535,421 | 52,538,634 | 3 | 0 | 3 | 1 |
| Case 80 | 19 | 52,542,465 | 53,013,899 | 3 | 1 | 4 | 0 |
| Case 80 | 19 | 53,014,019 | 53,117,549 | 2 | 1 | 3 | 0 |
| Case 80 | 19 | 53,117,609 | 53,293,834 | 3 | 1 | 4 | 0 |
| Case 80 | 19 | 53,297,766 | 53,382,381 | 2 | 1 | 3 | 0 |
| Case 80 | 19 | 53,383,865 | 53,456,126 | 3 | 0 | 3 | 1 |
| Case 80 | 19 | 53,456,127 | 53,637,115 | 3 | 1 | 4 | 0 |
| Case 80 | 19 | 53,642,708 | 53,756,120 | 2 | 1 | 3 | 0 |
| Case 80 | 19 | 53,757,505 | 54,206,688 | 3 | 1 | 4 | 0 |
| Case 80 | 19 | 54,207,589 | 54,314,477 | 2 | 1 | 3 | 0 |
| Case 80 | 19 | 54,314,489 | 54,578,196 | 3 | 1 | 4 | 0 |
| Case 80 | 19 | 54,578,328 | 54,677,167 | 3 | 0 | 3 | 1 |
| Case 80 | 19 | 54,677,897 | 55,111,727 | 3 | 1 | 4 | 0 |
| Case 80 | 19 | 55,111,785 | 55,143,209 | 3 | 0 | 3 | 1 |
| Case 80 | 19 | 55,143,452 | 55,360,486 | 3 | 1 | 4 | 0 |
| Case 80 | 19 | 55,362,859 | 55,496,583 | 2 | 1 | 3 | 0 |
| Case 80 | 19 | 55,497,674 | 55,661,621 | 3 | 1 | 4 | 0 |
| Case 80 | 19 | 55,663,250 | 55,697,718 | 2 | 1 | 3 | 0 |
| Case 80 | 19 | 55,698,955 | 55,967,789 | 2 | 2 | 4 | 0 |
| Case 80 | 19 | 55,971,133 | 55,995,498 | 2 | 1 | 3 | 0 |
| Case 80 | 19 | 55,995,886 | 56,918,598 | 3 | 1 | 4 | 0 |
| Case 80 | 19 | 56,924,761 | 57,109,821 | 2 | 1 | 3 | 0 |
| Case 80 | 19 | 57,110,922 | 57,630,475 | 3 | 1 | 4 | 0 |
| Case 80 | 19 | 57,640,185 | 57,731,443 | 2 | 1 | 3 | 0 |
| Case 80 | 19 | 57,734,848 | 57,839,567 | 3 | 1 | 4 | 0 |
| Case 80 | 19 | 57,840,314 | 58,050,063 | 2 | 1 | 3 | 0 |
| Case 80 | 19 | 58,058,246 | 58,101,681 | 3 | 1 | 4 | 0 |
| Case 80 | 19 | 58,101,790 | 58,153,577 | 2 | 1 | 3 | 0 |
| Case 80 | 19 | 58,153,596 | 58,436,041 | 3 | 1 | 4 | 0 |
| Case 80 | 19 | 58,437,524 | 58,600,048 | 2 | 1 | 3 | 0 |
| Case 80 | 19 | 58,601,221 | 58,773,014 | 3 | 1 | 4 | 0 |
| Case 80 | 19 | 58,773,053 | 59,097,160 | 2 | 1 | 3 | 0 |
| Case 80 | 20 | 63,244     | 2,058,009  | 3 | 3 | 6 | 0 |
| Case 80 | 20 | 2,059,834  | 3,306,879  | 3 | 2 | 5 | 0 |
| Case 80 | 20 | 3,329,231  | 3,329,231  | 2 | 2 | 4 | 0 |
| Case 80 | 20 | 3,339,581  | 3,649,619  | 4 | 2 | 6 | 0 |
| Case 80 | 20 | 3,649,949  | 3,897,654  | 3 | 2 | 5 | 0 |
| Case 80 | 20 | 3,899,342  | 3,903,634  | 2 | 2 | 4 | 0 |
| Case 80 | 20 | 3,905,730  | 6,510,902  | 4 | 2 | 6 | 0 |

|         |    |            |            |   |   |   |   |
|---------|----|------------|------------|---|---|---|---|
| Case 80 | 20 | 6,526,125  | 6,997,406  | 3 | 0 | 3 | 1 |
| Case 80 | 20 | 7,006,365  | 14,675,433 | 4 | 2 | 6 | 0 |
| Case 80 | 20 | 14,678,135 | 14,939,688 | 3 | 0 | 3 | 1 |
| Case 80 | 20 | 14,949,763 | 15,416,394 | 4 | 2 | 6 | 0 |
| Case 80 | 20 | 15,420,403 | 15,422,629 | 4 | 0 | 4 | 1 |
| Case 80 | 20 | 15,423,803 | 16,008,638 | 5 | 0 | 5 | 1 |
| Case 80 | 20 | 16,009,257 | 16,014,926 | 4 | 0 | 4 | 1 |
| Case 80 | 20 | 16,015,163 | 16,493,698 | 4 | 2 | 6 | 0 |
| Case 80 | 20 | 16,493,904 | 16,572,601 | 3 | 3 | 6 | 0 |
| Case 80 | 20 | 16,575,342 | 16,675,392 | 4 | 3 | 7 | 0 |
| Case 80 | 20 | 16,683,778 | 16,683,778 | 2 | 2 | 4 | 0 |
| Case 80 | 20 | 16,688,881 | 23,331,021 | 4 | 2 | 6 | 0 |
| Case 80 | 20 | 23,334,796 | 24,086,701 | 3 | 2 | 5 | 0 |
| Case 80 | 20 | 24,098,673 | 25,181,074 | 3 | 3 | 6 | 0 |
| Case 80 | 20 | 25,184,466 | 25,723,632 | 3 | 2 | 5 | 0 |
| Case 80 | 20 | 25,730,968 | 26,293,985 | 3 | 3 | 6 | 0 |
| Case 80 | 20 | 29,425,357 | 36,174,062 | 3 | 3 | 6 | 0 |
| Case 80 | 20 | 36,174,175 | 42,088,552 | 4 | 3 | 7 | 0 |
| Case 80 | 20 | 42,088,842 | 42,088,845 | 2 | 2 | 4 | 0 |
| Case 80 | 20 | 42,089,366 | 42,331,208 | 4 | 2 | 6 | 0 |
| Case 80 | 20 | 42,331,278 | 42,355,753 | 3 | 3 | 6 | 0 |
| Case 80 | 20 | 42,357,295 | 43,834,313 | 4 | 3 | 7 | 0 |
| Case 80 | 20 | 43,836,015 | 43,836,015 | 2 | 2 | 4 | 0 |
| Case 80 | 20 | 43,836,016 | 43,893,276 | 4 | 2 | 6 | 0 |
| Case 80 | 20 | 43,897,362 | 44,787,478 | 3 | 3 | 6 | 0 |
| Case 80 | 20 | 44,790,262 | 45,809,082 | 4 | 3 | 7 | 0 |
| Case 80 | 20 | 45,812,022 | 45,812,022 | 2 | 2 | 4 | 0 |
| Case 80 | 20 | 45,812,065 | 45,812,065 | 3 | 3 | 6 | 0 |
| Case 80 | 20 | 45,813,847 | 45,844,576 | 4 | 2 | 6 | 0 |
| Case 80 | 20 | 45,849,764 | 46,403,653 | 3 | 3 | 6 | 0 |
| Case 80 | 20 | 46,403,906 | 47,839,969 | 4 | 3 | 7 | 0 |
| Case 80 | 20 | 47,841,503 | 47,841,650 | 2 | 2 | 4 | 0 |
| Case 80 | 20 | 47,841,660 | 47,868,064 | 4 | 2 | 6 | 0 |
| Case 80 | 20 | 47,869,191 | 48,116,898 | 3 | 3 | 6 | 0 |
| Case 80 | 20 | 48,116,955 | 49,037,061 | 4 | 3 | 7 | 0 |
| Case 80 | 20 | 49,040,482 | 50,447,917 | 5 | 0 | 5 | 1 |
| Case 80 | 20 | 50,449,214 | 51,682,625 | 6 | 0 | 6 | 1 |
| Case 80 | 20 | 51,686,119 | 52,198,967 | 5 | 0 | 5 | 1 |
| Case 80 | 20 | 52,199,238 | 52,199,238 | 3 | 0 | 3 | 1 |
| Case 80 | 20 | 52,199,495 | 54,468,058 | 6 | 0 | 6 | 1 |
| Case 80 | 20 | 54,482,276 | 54,482,297 | 4 | 0 | 4 | 1 |
| Case 80 | 20 | 54,482,619 | 60,861,061 | 5 | 0 | 5 | 1 |
| Case 80 | 20 | 60,866,789 | 62,209,881 | 4 | 0 | 4 | 1 |
| Case 80 | 20 | 62,212,928 | 62,948,788 | 5 | 0 | 5 | 1 |
| Case 80 | 21 | 10,827,533 | 10,906,922 | 3 | 0 | 3 | 1 |
| Case 80 | 21 | 10,906,936 | 10,916,412 | 1 | 0 | 1 | 0 |
| Case 80 | 21 | 10,916,435 | 10,971,337 | 3 | 0 | 3 | 1 |
| Case 80 | 21 | 14,368,320 | 27,374,604 | 3 | 0 | 3 | 1 |
| Case 80 | 21 | 27,390,212 | 27,441,795 | 1 | 0 | 1 | 0 |
| Case 80 | 21 | 27,442,596 | 27,484,463 | 0 | 0 | 0 | 0 |
| Case 80 | 21 | 27,495,183 | 36,554,943 | 3 | 0 | 3 | 1 |
| Case 80 | 21 | 36,561,074 | 36,715,761 | 5 | 0 | 5 | 1 |
| Case 80 | 21 | 36,722,562 | 39,698,055 | 3 | 0 | 3 | 1 |
| Case 80 | 21 | 39,705,268 | 40,670,434 | 5 | 0 | 5 | 1 |
| Case 80 | 21 | 40,686,327 | 44,618,563 | 3 | 0 | 3 | 1 |
| Case 80 | 21 | 44,628,741 | 45,114,205 | 4 | 0 | 4 | 1 |
| Case 80 | 21 | 45,115,488 | 45,877,228 | 5 | 0 | 5 | 1 |
| Case 80 | 21 | 45,877,287 | 48,100,155 | 4 | 0 | 4 | 1 |
| Case 80 | 22 | 16,114,244 | 18,493,980 | 3 | 0 | 3 | 1 |
| Case 80 | 22 | 18,495,470 | 18,613,045 | 4 | 0 | 4 | 1 |
| Case 80 | 22 | 18,613,893 | 29,446,903 | 3 | 0 | 3 | 1 |

|         |    |             |             |   |   |   |   |
|---------|----|-------------|-------------|---|---|---|---|
| Case 80 | 22 | 29,449,477  | 29,454,998  | 0 | 0 | 0 | 0 |
| Case 80 | 22 | 29,455,003  | 29,455,003  | 3 | 0 | 3 | 1 |
| Case 80 | 22 | 29,456,467  | 29,467,221  | 1 | 0 | 1 | 0 |
| Case 80 | 22 | 29,468,456  | 29,513,729  | 0 | 0 | 0 | 0 |
| Case 80 | 22 | 29,517,453  | 42,896,474  | 3 | 0 | 3 | 1 |
| Case 80 | 22 | 42,907,619  | 42,950,033  | 3 | 1 | 4 | 0 |
| Case 80 | 22 | 42,956,211  | 46,362,396  | 3 | 0 | 3 | 1 |
| Case 80 | 22 | 46,363,739  | 50,647,098  | 4 | 0 | 4 | 1 |
| Case 80 | 22 | 50,647,969  | 50,909,181  | 5 | 0 | 5 | 1 |
| Case 80 | 22 | 50,910,875  | 51,195,728  | 4 | 0 | 4 | 1 |
| Case 82 | 1  | 82,154      | 17,248,532  | 1 | 1 | 2 | 0 |
| Case 82 | 1  | 17,249,161  | 17,281,359  | 0 | 0 | 0 | 0 |
| Case 82 | 1  | 17,282,425  | 18,807,953  | 1 | 1 | 2 | 0 |
| Case 82 | 1  | 18,807,968  | 18,807,972  | 5 | 2 | 7 | 0 |
| Case 82 | 1  | 18,808,056  | 93,639,101  | 1 | 1 | 2 | 0 |
| Case 82 | 1  | 93,645,182  | 93,730,427  | 1 | 0 | 1 | 0 |
| Case 82 | 1  | 93,741,025  | 109,366,554 | 1 | 1 | 2 | 0 |
| Case 82 | 1  | 109,367,944 | 109,371,874 | 0 | 0 | 0 | 0 |
| Case 82 | 1  | 109,373,214 | 121,346,616 | 1 | 1 | 2 | 0 |
| Case 82 | 1  | 142,649,718 | 227,839,384 | 1 | 1 | 2 | 0 |
| Case 82 | 1  | 227,842,385 | 227,843,423 | 0 | 0 | 0 | 0 |
| Case 82 | 1  | 227,862,055 | 228,495,832 | 1 | 1 | 2 | 0 |
| Case 82 | 1  | 228,495,983 | 228,509,555 | 1 | 0 | 1 | 0 |
| Case 82 | 1  | 228,509,579 | 249,218,992 | 1 | 1 | 2 | 0 |
| Case 82 | 2  | 18,674      | 89,931,911  | 1 | 1 | 2 | 0 |
| Case 82 | 2  | 90,010,895  | 90,240,473  | 0 | 0 | 0 | 0 |
| Case 82 | 2  | 91,776,211  | 92,081,640  | 1 | 1 | 2 | 0 |
| Case 82 | 2  | 95,429,424  | 109,392,302 | 1 | 1 | 2 | 0 |
| Case 82 | 2  | 109,392,356 | 109,513,654 | 1 | 0 | 1 | 0 |
| Case 82 | 2  | 109,513,673 | 243,048,760 | 1 | 1 | 2 | 0 |
| Case 82 | 3  | 61,495      | 16,578,457  | 1 | 1 | 2 | 0 |
| Case 82 | 3  | 16,585,132  | 16,656,331  | 1 | 0 | 1 | 0 |
| Case 82 | 3  | 16,662,488  | 65,185,849  | 1 | 1 | 2 | 0 |
| Case 82 | 3  | 65,191,847  | 65,215,804  | 0 | 0 | 0 | 0 |
| Case 82 | 3  | 65,219,095  | 90,442,925  | 1 | 1 | 2 | 0 |
| Case 82 | 3  | 93,537,290  | 180,325,561 | 1 | 1 | 2 | 0 |
| Case 82 | 3  | 180,325,754 | 180,337,082 | 0 | 0 | 0 | 0 |
| Case 82 | 3  | 180,337,700 | 197,838,262 | 1 | 1 | 2 | 0 |
| Case 82 | 4  | 71,566      | 86,089      | 1 | 1 | 2 | 0 |
| Case 82 | 4  | 86,137      | 442,021     | 1 | 0 | 1 | 0 |
| Case 82 | 4  | 445,794     | 49,620,898  | 1 | 1 | 2 | 0 |
| Case 82 | 4  | 52,697,856  | 190,963,766 | 1 | 1 | 2 | 0 |
| Case 82 | 5  | 38,139      | 32,101,400  | 1 | 1 | 2 | 0 |
| Case 82 | 5  | 32,107,381  | 32,159,517  | 5 | 0 | 5 | 1 |
| Case 82 | 5  | 32,169,547  | 46,399,093  | 1 | 1 | 2 | 0 |
| Case 82 | 5  | 49,457,282  | 139,931,613 | 1 | 1 | 2 | 0 |
| Case 82 | 5  | 139,931,617 | 139,931,652 | 0 | 0 | 0 | 0 |
| Case 82 | 5  | 139,931,653 | 180,693,127 | 1 | 1 | 2 | 0 |
| Case 82 | 6  | 108,666     | 32,592,737  | 1 | 1 | 2 | 0 |
| Case 82 | 6  | 32,592,851  | 32,692,227  | 1 | 0 | 1 | 0 |
| Case 82 | 6  | 32,692,493  | 58,752,089  | 1 | 1 | 2 | 0 |
| Case 82 | 6  | 61,891,118  | 170,980,171 | 1 | 1 | 2 | 0 |
| Case 82 | 7  | 44,935      | 11,306,897  | 1 | 1 | 2 | 0 |
| Case 82 | 7  | 11,313,841  | 11,349,438  | 0 | 0 | 0 | 0 |
| Case 82 | 7  | 11,351,104  | 58,019,061  | 1 | 1 | 2 | 0 |
| Case 82 | 7  | 61,056,053  | 61,994,170  | 1 | 1 | 2 | 0 |
| Case 82 | 7  | 62,035,570  | 62,458,262  | 1 | 0 | 1 | 0 |
| Case 82 | 7  | 62,479,327  | 64,152,339  | 1 | 1 | 2 | 0 |
| Case 82 | 7  | 64,166,802  | 64,451,649  | 1 | 0 | 1 | 0 |
| Case 82 | 7  | 64,451,699  | 141,759,994 | 1 | 1 | 2 | 0 |
| Case 82 | 7  | 141,761,438 | 141,782,731 | 0 | 0 | 0 | 0 |



|         |    |             |             |   |   |   |   |
|---------|----|-------------|-------------|---|---|---|---|
| Case 82 | 7  | 141,793,419 | 149,486,256 | 1 | 1 | 2 | 0 |
| Case 82 | 7  | 149,486,333 | 149,519,760 | 1 | 0 | 1 | 0 |
| Case 82 | 7  | 149,519,770 | 159,119,486 | 1 | 1 | 2 | 0 |
| Case 82 | 8  | 164,984     | 195,254     | 1 | 1 | 2 | 0 |
| Case 82 | 8  | 195,338     | 196,197     | 0 | 0 | 0 | 0 |
| Case 82 | 8  | 196,274     | 2,132,561   | 1 | 1 | 2 | 0 |
| Case 82 | 8  | 2,133,338   | 2,391,471   | 5 | 0 | 5 | 1 |
| Case 82 | 8  | 2,394,776   | 15,410,250  | 1 | 1 | 2 | 0 |
| Case 82 | 8  | 15,419,777  | 15,452,518  | 0 | 0 | 0 | 0 |
| Case 82 | 8  | 15,461,996  | 43,791,691  | 1 | 1 | 2 | 0 |
| Case 82 | 8  | 46,886,735  | 144,942,718 | 1 | 1 | 2 | 0 |
| Case 82 | 8  | 144,942,796 | 145,005,743 | 1 | 0 | 1 | 0 |
| Case 82 | 8  | 145,005,769 | 146,293,414 | 1 | 1 | 2 | 0 |
| Case 82 | 9  | 46,587      | 26,867,333  | 1 | 1 | 2 | 0 |
| Case 82 | 9  | 26,869,532  | 27,055,630  | 1 | 0 | 1 | 0 |
| Case 82 | 9  | 27,055,671  | 46,944,322  | 1 | 1 | 2 | 0 |
| Case 82 | 9  | 65,629,772  | 140,164,250 | 1 | 1 | 2 | 0 |
| Case 82 | 9  | 140,165,510 | 140,268,976 | 1 | 0 | 1 | 0 |
| Case 82 | 9  | 140,271,414 | 141,066,491 | 1 | 1 | 2 | 0 |
| Case 82 | 10 | 98,087      | 39,097,912  | 1 | 1 | 2 | 0 |
| Case 82 | 10 | 42,436,301  | 91,479,288  | 1 | 1 | 2 | 0 |
| Case 82 | 10 | 91,479,399  | 91,532,536  | 1 | 0 | 1 | 0 |
| Case 82 | 10 | 91,532,568  | 135,477,883 | 1 | 1 | 2 | 0 |
| Case 82 | 11 | 193,146     | 551,204     | 1 | 1 | 2 | 0 |
| Case 82 | 11 | 551,229     | 608,800     | 1 | 0 | 1 | 0 |
| Case 82 | 11 | 608,812     | 50,468,978  | 1 | 1 | 2 | 0 |
| Case 82 | 11 | 50,476,268  | 51,372,036  | 0 | 0 | 0 | 0 |
| Case 82 | 11 | 51,379,204  | 51,591,253  | 1 | 1 | 2 | 0 |
| Case 82 | 11 | 54,794,237  | 134,615,334 | 1 | 1 | 2 | 0 |
| Case 82 | 11 | 134,617,321 | 134,626,887 | 5 | 0 | 5 | 1 |
| Case 82 | 11 | 134,631,823 | 134,934,063 | 1 | 1 | 2 | 0 |
| Case 82 | 12 | 191,619     | 34,853,011  | 1 | 1 | 2 | 0 |
| Case 82 | 12 | 37,876,400  | 133,777,645 | 1 | 1 | 2 | 0 |
| Case 82 | 12 | 133,778,796 | 133,810,935 | 1 | 0 | 1 | 0 |
| Case 82 | 13 | 19,058,717  | 115,103,529 | 1 | 1 | 2 | 0 |
| Case 82 | 14 | 19,280,733  | 20,249,316  | 1 | 1 | 2 | 0 |
| Case 82 | 14 | 20,249,407  | 20,420,338  | 4 | 0 | 4 | 1 |
| Case 82 | 14 | 20,425,051  | 107,287,663 | 1 | 1 | 2 | 0 |
| Case 82 | 15 | 20,034,919  | 20,212,798  | 4 | 3 | 7 | 0 |
| Case 82 | 15 | 20,612,840  | 33,905,410  | 1 | 1 | 2 | 0 |
| Case 82 | 15 | 33,907,628  | 33,909,822  | 0 | 0 | 0 | 0 |
| Case 82 | 15 | 33,911,733  | 34,667,075  | 1 | 1 | 2 | 0 |
| Case 82 | 15 | 34,671,124  | 34,800,595  | 0 | 0 | 0 | 0 |
| Case 82 | 15 | 34,871,296  | 102,461,162 | 1 | 1 | 2 | 0 |
| Case 82 | 16 | 88,165      | 775,878     | 1 | 1 | 2 | 0 |
| Case 82 | 16 | 776,037     | 830,639     | 1 | 0 | 1 | 0 |
| Case 82 | 16 | 831,496     | 28,608,487  | 1 | 1 | 2 | 0 |
| Case 82 | 16 | 28,615,243  | 28,620,752  | 5 | 2 | 7 | 0 |
| Case 82 | 16 | 28,628,143  | 35,285,582  | 1 | 1 | 2 | 0 |
| Case 82 | 16 | 46,450,037  | 90,274,695  | 1 | 1 | 2 | 0 |
| Case 82 | 17 | 11,885      | 22,242,355  | 1 | 1 | 2 | 0 |
| Case 82 | 17 | 25,268,142  | 81,060,040  | 1 | 1 | 2 | 0 |
| Case 82 | 18 | 87,505      | 15,375,878  | 1 | 1 | 2 | 0 |
| Case 82 | 18 | 18,520,354  | 78,015,180  | 1 | 1 | 2 | 0 |
| Case 82 | 19 | 260,912     | 647,039     | 1 | 1 | 2 | 0 |
| Case 82 | 19 | 647,251     | 881,651     | 1 | 0 | 1 | 0 |
| Case 82 | 19 | 885,832     | 9,401,159   | 1 | 1 | 2 | 0 |
| Case 82 | 19 | 9,404,914   | 9,453,311   | 1 | 0 | 1 | 0 |
| Case 82 | 19 | 9,453,385   | 11,828,410  | 1 | 1 | 2 | 0 |
| Case 82 | 19 | 11,832,283  | 12,581,063  | 1 | 0 | 1 | 0 |
| Case 82 | 19 | 12,586,385  | 20,209,589  | 1 | 1 | 2 | 0 |

|         |    |             |             |   |   |   |   |
|---------|----|-------------|-------------|---|---|---|---|
| Case 82 | 19 | 20,211,540  | 21,752,009  | 1 | 0 | 1 | 0 |
| Case 82 | 19 | 21,771,069  | 23,804,041  | 1 | 1 | 2 | 0 |
| Case 82 | 19 | 23,814,365  | 24,629,285  | 1 | 0 | 1 | 0 |
| Case 82 | 19 | 27,732,159  | 28,036,744  | 1 | 0 | 1 | 0 |
| Case 82 | 19 | 28,054,130  | 38,028,484  | 1 | 1 | 2 | 0 |
| Case 82 | 19 | 38,030,003  | 38,240,098  | 1 | 0 | 1 | 0 |
| Case 82 | 19 | 38,241,015  | 40,502,919  | 1 | 1 | 2 | 0 |
| Case 82 | 19 | 40,502,943  | 40,719,959  | 1 | 0 | 1 | 0 |
| Case 82 | 19 | 40,720,381  | 44,348,824  | 1 | 1 | 2 | 0 |
| Case 82 | 19 | 44,348,919  | 44,377,614  | 1 | 0 | 1 | 0 |
| Case 82 | 19 | 44,377,669  | 52,887,131  | 1 | 1 | 2 | 0 |
| Case 82 | 19 | 52,887,282  | 53,454,762  | 1 | 0 | 1 | 0 |
| Case 82 | 19 | 53,454,789  | 59,097,160  | 1 | 1 | 2 | 0 |
| Case 82 | 20 | 63,244      | 26,293,985  | 1 | 1 | 2 | 0 |
| Case 82 | 20 | 29,425,357  | 60,881,736  | 1 | 1 | 2 | 0 |
| Case 82 | 20 | 60,881,780  | 60,899,224  | 1 | 0 | 1 | 0 |
| Case 82 | 20 | 60,899,513  | 62,187,230  | 1 | 1 | 2 | 0 |
| Case 82 | 20 | 62,187,395  | 62,203,708  | 1 | 0 | 1 | 0 |
| Case 82 | 20 | 62,207,862  | 62,948,788  | 1 | 1 | 2 | 0 |
| Case 82 | 21 | 10,827,533  | 10,971,337  | 1 | 1 | 2 | 0 |
| Case 82 | 21 | 14,368,320  | 25,037,172  | 1 | 1 | 2 | 0 |
| Case 82 | 21 | 25,041,047  | 25,211,674  | 1 | 0 | 1 | 0 |
| Case 82 | 21 | 25,212,382  | 48,100,155  | 1 | 1 | 2 | 0 |
| Case 82 | 22 | 16,114,244  | 51,195,728  | 1 | 1 | 2 | 0 |
| Case 83 | 1  | 82,154      | 978,628     | 1 | 0 | 1 | 0 |
| Case 83 | 1  | 978,645     | 1,164,015   | 1 | 1 | 2 | 0 |
| Case 83 | 1  | 1,164,018   | 2,459,166   | 1 | 0 | 1 | 0 |
| Case 83 | 1  | 2,461,316   | 6,572,175   | 1 | 1 | 2 | 0 |
| Case 83 | 1  | 6,577,765   | 6,601,932   | 0 | 0 | 0 | 0 |
| Case 83 | 1  | 6,605,226   | 9,942,118   | 1 | 1 | 2 | 0 |
| Case 83 | 1  | 9,970,779   | 10,521,629  | 1 | 0 | 1 | 0 |
| Case 83 | 1  | 10,521,644  | 35,447,598  | 1 | 1 | 2 | 0 |
| Case 83 | 1  | 35,451,539  | 35,905,941  | 1 | 0 | 1 | 0 |
| Case 83 | 1  | 35,907,899  | 79,387,350  | 1 | 1 | 2 | 0 |
| Case 83 | 1  | 79,387,410  | 80,735,096  | 1 | 0 | 1 | 0 |
| Case 83 | 1  | 80,737,948  | 92,442,802  | 1 | 1 | 2 | 0 |
| Case 83 | 1  | 92,442,902  | 93,787,867  | 1 | 0 | 1 | 0 |
| Case 83 | 1  | 93,795,932  | 104,017,778 | 1 | 1 | 2 | 0 |
| Case 83 | 1  | 104,019,631 | 106,568,613 | 1 | 0 | 1 | 0 |
| Case 83 | 1  | 106,568,904 | 118,799,439 | 1 | 1 | 2 | 0 |
| Case 83 | 1  | 118,815,799 | 119,217,675 | 1 | 0 | 1 | 0 |
| Case 83 | 1  | 119,224,268 | 121,346,616 | 1 | 1 | 2 | 0 |
| Case 83 | 1  | 142,649,718 | 169,738,202 | 1 | 1 | 2 | 0 |
| Case 83 | 1  | 169,739,650 | 169,816,943 | 1 | 0 | 1 | 0 |
| Case 83 | 1  | 169,818,763 | 196,801,025 | 1 | 1 | 2 | 0 |
| Case 83 | 1  | 196,823,300 | 196,901,753 | 7 | 0 | 7 | 1 |
| Case 83 | 1  | 196,918,605 | 200,450,197 | 1 | 1 | 2 | 0 |
| Case 83 | 1  | 200,450,475 | 200,827,806 | 1 | 0 | 1 | 0 |
| Case 83 | 1  | 200,829,992 | 249,218,992 | 1 | 1 | 2 | 0 |
| Case 83 | 2  | 18,674      | 487,043     | 1 | 1 | 2 | 0 |
| Case 83 | 2  | 499,823     | 41,701,800  | 2 | 0 | 2 | 1 |
| Case 83 | 2  | 41,704,150  | 42,281,338  | 2 | 1 | 3 | 0 |
| Case 83 | 2  | 42,281,413  | 76,947,356  | 2 | 0 | 2 | 1 |
| Case 83 | 2  | 76,947,750  | 81,107,544  | 2 | 2 | 4 | 0 |
| Case 83 | 2  | 81,115,259  | 81,125,236  | 2 | 1 | 3 | 0 |
| Case 83 | 2  | 81,126,233  | 82,522,552  | 1 | 1 | 2 | 0 |
| Case 83 | 2  | 82,524,725  | 92,081,640  | 2 | 1 | 3 | 0 |
| Case 83 | 2  | 95,429,424  | 99,227,330  | 2 | 1 | 3 | 0 |
| Case 83 | 2  | 99,232,312  | 100,683,550 | 1 | 1 | 2 | 0 |
| Case 83 | 2  | 100,686,486 | 101,052,766 | 2 | 1 | 3 | 0 |
| Case 83 | 2  | 101,059,210 | 102,880,823 | 2 | 0 | 2 | 1 |

|         |   |             |             |   |   |   |   |
|---------|---|-------------|-------------|---|---|---|---|
| Case 83 | 2 | 102,883,975 | 107,816,413 | 1 | 1 | 2 | 0 |
| Case 83 | 2 | 107,820,073 | 109,578,855 | 1 | 0 | 1 | 0 |
| Case 83 | 2 | 109,579,738 | 110,320,075 | 1 | 1 | 2 | 0 |
| Case 83 | 2 | 110,323,375 | 111,449,141 | 1 | 0 | 1 | 0 |
| Case 83 | 2 | 111,451,816 | 114,096,780 | 1 | 1 | 2 | 0 |
| Case 83 | 2 | 114,099,346 | 114,609,888 | 1 | 0 | 1 | 0 |
| Case 83 | 2 | 114,612,068 | 116,332,653 | 1 | 1 | 2 | 0 |
| Case 83 | 2 | 116,336,847 | 118,582,279 | 1 | 0 | 1 | 0 |
| Case 83 | 2 | 118,582,650 | 120,489,760 | 1 | 1 | 2 | 0 |
| Case 83 | 2 | 120,490,776 | 120,903,590 | 0 | 0 | 0 | 0 |
| Case 83 | 2 | 120,903,814 | 123,566,021 | 1 | 1 | 2 | 0 |
| Case 83 | 2 | 123,574,925 | 124,621,037 | 1 | 0 | 1 | 0 |
| Case 83 | 2 | 124,631,703 | 125,614,376 | 1 | 1 | 2 | 0 |
| Case 83 | 2 | 125,622,970 | 127,423,066 | 1 | 0 | 1 | 0 |
| Case 83 | 2 | 127,424,849 | 128,350,808 | 1 | 1 | 2 | 0 |
| Case 83 | 2 | 128,351,149 | 129,015,968 | 1 | 0 | 1 | 0 |
| Case 83 | 2 | 129,016,127 | 139,591,769 | 1 | 1 | 2 | 0 |
| Case 83 | 2 | 139,593,079 | 144,177,579 | 1 | 0 | 1 | 0 |
| Case 83 | 2 | 144,178,400 | 148,542,963 | 1 | 1 | 2 | 0 |
| Case 83 | 2 | 148,543,509 | 149,206,943 | 1 | 0 | 1 | 0 |
| Case 83 | 2 | 149,208,646 | 150,425,265 | 1 | 1 | 2 | 0 |
| Case 83 | 2 | 150,425,584 | 152,363,502 | 1 | 0 | 1 | 0 |
| Case 83 | 2 | 152,364,552 | 153,834,578 | 1 | 1 | 2 | 0 |
| Case 83 | 2 | 153,843,128 | 155,255,152 | 1 | 0 | 1 | 0 |
| Case 83 | 2 | 155,267,552 | 174,267,348 | 2 | 0 | 2 | 1 |
| Case 83 | 2 | 174,271,805 | 174,697,302 | 2 | 1 | 3 | 0 |
| Case 83 | 2 | 174,698,705 | 178,096,062 | 1 | 1 | 2 | 0 |
| Case 83 | 2 | 178,096,406 | 226,178,411 | 2 | 0 | 2 | 1 |
| Case 83 | 2 | 226,183,385 | 226,423,124 | 1 | 1 | 2 | 0 |
| Case 83 | 2 | 226,424,630 | 232,944,860 | 2 | 0 | 2 | 1 |
| Case 83 | 2 | 232,950,374 | 234,338,179 | 1 | 1 | 2 | 0 |
| Case 83 | 2 | 234,346,660 | 243,048,760 | 2 | 0 | 2 | 1 |
| Case 83 | 3 | 61,495      | 49,050,499  | 1 | 1 | 2 | 0 |
| Case 83 | 3 | 49,050,501  | 59,821,901  | 1 | 0 | 1 | 0 |
| Case 83 | 3 | 59,828,149  | 60,860,868  | 1 | 1 | 2 | 0 |
| Case 83 | 3 | 60,871,882  | 61,136,894  | 1 | 0 | 1 | 0 |
| Case 83 | 3 | 61,139,748  | 90,442,925  | 1 | 1 | 2 | 0 |
| Case 83 | 3 | 93,537,290  | 163,687,895 | 1 | 1 | 2 | 0 |
| Case 83 | 3 | 163,693,304 | 164,785,246 | 1 | 0 | 1 | 0 |
| Case 83 | 3 | 164,786,506 | 197,838,262 | 1 | 1 | 2 | 0 |
| Case 83 | 4 | 71,566      | 438,080     | 1 | 0 | 1 | 0 |
| Case 83 | 4 | 442,021     | 1,807,894   | 1 | 1 | 2 | 0 |
| Case 83 | 4 | 1,808,391   | 2,307,121   | 1 | 0 | 1 | 0 |
| Case 83 | 4 | 2,307,177   | 31,196,514  | 1 | 1 | 2 | 0 |
| Case 83 | 4 | 31,200,828  | 32,240,417  | 1 | 0 | 1 | 0 |
| Case 83 | 4 | 32,244,696  | 34,510,322  | 1 | 1 | 2 | 0 |
| Case 83 | 4 | 34,516,037  | 35,726,689  | 1 | 0 | 1 | 0 |
| Case 83 | 4 | 35,727,026  | 39,116,798  | 1 | 1 | 2 | 0 |
| Case 83 | 4 | 39,116,911  | 40,158,464  | 1 | 0 | 1 | 0 |
| Case 83 | 4 | 40,162,971  | 49,620,898  | 1 | 1 | 2 | 0 |
| Case 83 | 4 | 52,697,856  | 63,263,936  | 1 | 1 | 2 | 0 |
| Case 83 | 4 | 63,281,335  | 65,170,415  | 1 | 0 | 1 | 0 |
| Case 83 | 4 | 65,170,892  | 67,140,834  | 1 | 1 | 2 | 0 |
| Case 83 | 4 | 67,147,791  | 68,378,287  | 1 | 0 | 1 | 0 |
| Case 83 | 4 | 68,379,299  | 104,004,362 | 1 | 1 | 2 | 0 |
| Case 83 | 4 | 104,006,315 | 104,257,925 | 1 | 0 | 1 | 0 |
| Case 83 | 4 | 104,258,396 | 113,435,847 | 1 | 1 | 2 | 0 |
| Case 83 | 4 | 113,436,546 | 113,953,581 | 1 | 0 | 1 | 0 |
| Case 83 | 4 | 113,954,301 | 134,800,222 | 1 | 1 | 2 | 0 |
| Case 83 | 4 | 134,815,036 | 137,693,116 | 1 | 0 | 1 | 0 |
| Case 83 | 4 | 137,694,429 | 169,008,885 | 1 | 1 | 2 | 0 |

|         |   |             |             |   |   |   |   |
|---------|---|-------------|-------------|---|---|---|---|
| Case 83 | 4 | 169,011,633 | 169,343,061 | 1 | 0 | 1 | 0 |
| Case 83 | 4 | 169,343,522 | 190,963,766 | 1 | 1 | 2 | 0 |
| Case 83 | 5 | 38,139      | 32,101,400  | 1 | 1 | 2 | 0 |
| Case 83 | 5 | 32,107,381  | 32,159,517  | 4 | 3 | 7 | 0 |
| Case 83 | 5 | 32,169,547  | 45,905,997  | 1 | 1 | 2 | 0 |
| Case 83 | 5 | 45,925,213  | 46,399,093  | 1 | 0 | 1 | 0 |
| Case 83 | 5 | 49,457,282  | 50,289,496  | 1 | 0 | 1 | 0 |
| Case 83 | 5 | 50,292,595  | 54,527,466  | 2 | 0 | 2 | 1 |
| Case 83 | 5 | 54,527,571  | 57,911,848  | 1 | 0 | 1 | 0 |
| Case 83 | 5 | 57,913,379  | 61,428,137  | 2 | 0 | 2 | 1 |
| Case 83 | 5 | 61,428,613  | 61,856,986  | 1 | 0 | 1 | 0 |
| Case 83 | 5 | 61,857,063  | 64,496,326  | 2 | 0 | 2 | 1 |
| Case 83 | 5 | 64,497,632  | 65,350,043  | 1 | 0 | 1 | 0 |
| Case 83 | 5 | 65,350,250  | 66,095,512  | 2 | 0 | 2 | 1 |
| Case 83 | 5 | 66,099,356  | 66,833,997  | 1 | 0 | 1 | 0 |
| Case 83 | 5 | 66,834,409  | 68,342,235  | 2 | 0 | 2 | 1 |
| Case 83 | 5 | 68,345,648  | 70,862,874  | 1 | 0 | 1 | 0 |
| Case 83 | 5 | 70,873,013  | 72,023,208  | 2 | 0 | 2 | 1 |
| Case 83 | 5 | 72,032,166  | 72,408,246  | 1 | 0 | 1 | 0 |
| Case 83 | 5 | 72,408,589  | 72,868,322  | 2 | 0 | 2 | 1 |
| Case 83 | 5 | 72,868,397  | 73,207,355  | 1 | 0 | 1 | 0 |
| Case 83 | 5 | 73,207,372  | 75,591,710  | 2 | 0 | 2 | 1 |
| Case 83 | 5 | 75,594,360  | 76,029,192  | 1 | 0 | 1 | 0 |
| Case 83 | 5 | 76,029,200  | 79,704,614  | 2 | 0 | 2 | 1 |
| Case 83 | 5 | 79,721,720  | 80,199,400  | 1 | 0 | 1 | 0 |
| Case 83 | 5 | 80,200,144  | 81,896,198  | 2 | 0 | 2 | 1 |
| Case 83 | 5 | 81,896,956  | 82,189,112  | 1 | 0 | 1 | 0 |
| Case 83 | 5 | 82,189,299  | 82,871,546  | 2 | 0 | 2 | 1 |
| Case 83 | 5 | 82,875,800  | 83,890,606  | 1 | 0 | 1 | 0 |
| Case 83 | 5 | 83,897,084  | 84,664,400  | 2 | 0 | 2 | 1 |
| Case 83 | 5 | 84,666,906  | 87,315,252  | 1 | 0 | 1 | 0 |
| Case 83 | 5 | 87,318,551  | 89,771,964  | 2 | 0 | 2 | 1 |
| Case 83 | 5 | 89,777,895  | 90,103,554  | 1 | 0 | 1 | 0 |
| Case 83 | 5 | 90,106,190  | 90,609,868  | 2 | 0 | 2 | 1 |
| Case 83 | 5 | 90,620,309  | 91,831,697  | 1 | 0 | 1 | 0 |
| Case 83 | 5 | 91,840,153  | 92,980,916  | 2 | 0 | 2 | 1 |
| Case 83 | 5 | 92,987,801  | 94,168,290  | 1 | 0 | 1 | 0 |
| Case 83 | 5 | 94,174,183  | 96,232,099  | 2 | 0 | 2 | 1 |
| Case 83 | 5 | 96,232,502  | 105,635,825 | 1 | 0 | 1 | 0 |
| Case 83 | 5 | 105,642,031 | 107,364,363 | 2 | 0 | 2 | 1 |
| Case 83 | 5 | 107,374,684 | 107,921,232 | 1 | 0 | 1 | 0 |
| Case 83 | 5 | 107,923,624 | 108,664,929 | 2 | 0 | 2 | 1 |
| Case 83 | 5 | 108,670,421 | 109,230,397 | 1 | 0 | 1 | 0 |
| Case 83 | 5 | 109,237,529 | 112,848,767 | 2 | 0 | 2 | 1 |
| Case 83 | 5 | 112,849,608 | 115,377,150 | 1 | 0 | 1 | 0 |
| Case 83 | 5 | 115,378,103 | 116,750,291 | 2 | 0 | 2 | 1 |
| Case 83 | 5 | 116,751,170 | 118,943,108 | 1 | 0 | 1 | 0 |
| Case 83 | 5 | 118,947,467 | 120,690,354 | 2 | 0 | 2 | 1 |
| Case 83 | 5 | 120,692,891 | 121,428,330 | 1 | 0 | 1 | 0 |
| Case 83 | 5 | 121,428,395 | 127,448,588 | 2 | 0 | 2 | 1 |
| Case 83 | 5 | 127,450,346 | 128,395,295 | 1 | 0 | 1 | 0 |
| Case 83 | 5 | 128,397,565 | 130,767,038 | 2 | 0 | 2 | 1 |
| Case 83 | 5 | 130,769,229 | 131,319,036 | 1 | 0 | 1 | 0 |
| Case 83 | 5 | 131,322,494 | 136,997,619 | 2 | 0 | 2 | 1 |
| Case 83 | 5 | 136,998,182 | 137,754,658 | 1 | 0 | 1 | 0 |
| Case 83 | 5 | 137,754,711 | 139,747,468 | 2 | 0 | 2 | 1 |
| Case 83 | 5 | 139,747,914 | 139,931,656 | 1 | 0 | 1 | 0 |
| Case 83 | 5 | 139,931,658 | 142,612,938 | 2 | 0 | 2 | 1 |
| Case 83 | 5 | 142,623,288 | 142,779,720 | 1 | 0 | 1 | 0 |
| Case 83 | 5 | 142,780,139 | 161,464,255 | 2 | 0 | 2 | 1 |
| Case 83 | 5 | 161,466,651 | 162,245,076 | 1 | 0 | 1 | 0 |

|         |    |             |             |   |   |   |   |
|---------|----|-------------|-------------|---|---|---|---|
| Case 83 | 5  | 162,245,529 | 165,228,923 | 2 | 0 | 2 | 1 |
| Case 83 | 5  | 165,229,136 | 166,428,641 | 1 | 0 | 1 | 0 |
| Case 83 | 5  | 166,430,508 | 168,811,335 | 2 | 0 | 2 | 1 |
| Case 83 | 5  | 168,816,501 | 169,028,383 | 1 | 0 | 1 | 0 |
| Case 83 | 5  | 169,028,397 | 178,270,810 | 2 | 0 | 2 | 1 |
| Case 83 | 5  | 178,274,144 | 178,507,270 | 1 | 0 | 1 | 0 |
| Case 83 | 5  | 178,510,048 | 180,693,127 | 2 | 0 | 2 | 1 |
| Case 83 | 6  | 108,666     | 1,359,690   | 1 | 1 | 2 | 0 |
| Case 83 | 6  | 1,361,844   | 1,660,002   | 2 | 1 | 3 | 0 |
| Case 83 | 6  | 1,661,058   | 31,074,101  | 1 | 1 | 2 | 0 |
| Case 83 | 6  | 31,075,115  | 31,105,891  | 2 | 1 | 3 | 0 |
| Case 83 | 6  | 31,105,900  | 32,418,031  | 1 | 1 | 2 | 0 |
| Case 83 | 6  | 32,418,848  | 32,637,994  | 2 | 0 | 2 | 1 |
| Case 83 | 6  | 32,640,336  | 37,569,632  | 1 | 1 | 2 | 0 |
| Case 83 | 6  | 37,569,693  | 37,758,876  | 2 | 1 | 3 | 0 |
| Case 83 | 6  | 37,759,821  | 51,705,624  | 1 | 1 | 2 | 0 |
| Case 83 | 6  | 51,710,649  | 52,399,307  | 2 | 1 | 3 | 0 |
| Case 83 | 6  | 52,400,889  | 58,752,089  | 1 | 1 | 2 | 0 |
| Case 83 | 6  | 61,891,118  | 162,371,705 | 1 | 1 | 2 | 0 |
| Case 83 | 6  | 162,375,909 | 162,633,618 | 2 | 0 | 2 | 1 |
| Case 83 | 6  | 162,634,337 | 170,980,171 | 1 | 1 | 2 | 0 |
| Case 83 | 7  | 44,935      | 47,481,602  | 1 | 1 | 2 | 0 |
| Case 83 | 7  | 47,481,628  | 47,564,745  | 2 | 0 | 2 | 1 |
| Case 83 | 7  | 47,564,942  | 58,019,061  | 1 | 1 | 2 | 0 |
| Case 83 | 7  | 61,056,053  | 61,056,053  | 1 | 1 | 2 | 0 |
| Case 83 | 7  | 61,074,194  | 62,043,624  | 1 | 0 | 1 | 0 |
| Case 83 | 7  | 62,047,108  | 62,458,262  | 0 | 0 | 0 | 0 |
| Case 83 | 7  | 62,479,327  | 62,729,224  | 1 | 0 | 1 | 0 |
| Case 83 | 7  | 62,777,355  | 94,768,272  | 1 | 1 | 2 | 0 |
| Case 83 | 7  | 94,769,231  | 95,231,456  | 2 | 1 | 3 | 0 |
| Case 83 | 7  | 95,236,687  | 128,451,004 | 1 | 1 | 2 | 0 |
| Case 83 | 7  | 128,452,816 | 128,586,616 | 2 | 1 | 3 | 0 |
| Case 83 | 7  | 128,587,524 | 142,525,934 | 1 | 1 | 2 | 0 |
| Case 83 | 7  | 142,531,590 | 143,095,979 | 2 | 1 | 3 | 0 |
| Case 83 | 7  | 143,096,020 | 159,119,486 | 1 | 1 | 2 | 0 |
| Case 83 | 8  | 164,984     | 231,287     | 1 | 1 | 2 | 0 |
| Case 83 | 8  | 234,742     | 43,791,691  | 3 | 1 | 4 | 0 |
| Case 83 | 8  | 46,886,735  | 143,257,317 | 3 | 1 | 4 | 0 |
| Case 83 | 8  | 143,258,503 | 146,293,414 | 2 | 1 | 3 | 0 |
| Case 83 | 9  | 46,587      | 46,944,322  | 1 | 1 | 2 | 0 |
| Case 83 | 9  | 65,629,772  | 89,670,188  | 1 | 1 | 2 | 0 |
| Case 83 | 9  | 89,673,000  | 89,954,522  | 2 | 1 | 3 | 0 |
| Case 83 | 9  | 89,955,458  | 100,981,757 | 1 | 1 | 2 | 0 |
| Case 83 | 9  | 100,983,215 | 101,866,291 | 2 | 0 | 2 | 1 |
| Case 83 | 9  | 101,875,789 | 103,665,363 | 1 | 0 | 1 | 0 |
| Case 83 | 9  | 103,675,913 | 104,630,136 | 2 | 0 | 2 | 1 |
| Case 83 | 9  | 104,637,950 | 106,126,869 | 1 | 0 | 1 | 0 |
| Case 83 | 9  | 106,137,424 | 107,690,057 | 2 | 0 | 2 | 1 |
| Case 83 | 9  | 107,690,450 | 108,179,115 | 1 | 0 | 1 | 0 |
| Case 83 | 9  | 108,191,511 | 141,066,491 | 1 | 1 | 2 | 0 |
| Case 83 | 10 | 98,087      | 39,097,912  | 1 | 1 | 2 | 0 |
| Case 83 | 10 | 42,436,301  | 56,545,395  | 1 | 1 | 2 | 0 |
| Case 83 | 10 | 56,547,552  | 57,669,027  | 1 | 0 | 1 | 0 |
| Case 83 | 10 | 57,671,424  | 91,404,388  | 1 | 1 | 2 | 0 |
| Case 83 | 10 | 91,404,443  | 91,528,504  | 1 | 0 | 1 | 0 |
| Case 83 | 10 | 91,529,457  | 94,613,240  | 1 | 1 | 2 | 0 |
| Case 83 | 10 | 94,618,241  | 94,819,053  | 1 | 0 | 1 | 0 |
| Case 83 | 10 | 94,819,606  | 96,540,889  | 1 | 1 | 2 | 0 |
| Case 83 | 10 | 96,541,615  | 96,824,975  | 1 | 0 | 1 | 0 |
| Case 83 | 10 | 96,825,091  | 135,477,883 | 1 | 1 | 2 | 0 |
| Case 83 | 11 | 193,146     | 549,119     | 1 | 1 | 2 | 0 |

|         |    |             |             |   |   |   |   |
|---------|----|-------------|-------------|---|---|---|---|
| Case 83 | 11 | 549,946     | 608,890     | 1 | 0 | 1 | 0 |
| Case 83 | 11 | 608,929     | 1,062,867   | 1 | 1 | 2 | 0 |
| Case 83 | 11 | 1,062,990   | 1,659,308   | 1 | 0 | 1 | 0 |
| Case 83 | 11 | 1,659,810   | 23,564,329  | 1 | 1 | 2 | 0 |
| Case 83 | 11 | 23,564,493  | 23,888,384  | 1 | 0 | 1 | 0 |
| Case 83 | 11 | 23,890,569  | 37,968,683  | 1 | 1 | 2 | 0 |
| Case 83 | 11 | 37,975,643  | 39,327,563  | 1 | 0 | 1 | 0 |
| Case 83 | 11 | 39,327,959  | 41,294,454  | 1 | 1 | 2 | 0 |
| Case 83 | 11 | 41,299,498  | 41,781,613  | 1 | 0 | 1 | 0 |
| Case 83 | 11 | 41,786,402  | 50,381,750  | 1 | 1 | 2 | 0 |
| Case 83 | 11 | 50,417,549  | 51,372,036  | 0 | 0 | 0 | 0 |
| Case 83 | 11 | 51,379,204  | 51,591,253  | 1 | 1 | 2 | 0 |
| Case 83 | 11 | 54,794,237  | 98,463,122  | 1 | 1 | 2 | 0 |
| Case 83 | 11 | 98,463,371  | 99,321,743  | 1 | 0 | 1 | 0 |
| Case 83 | 11 | 99,322,049  | 102,980,324 | 1 | 1 | 2 | 0 |
| Case 83 | 11 | 102,981,300 | 103,349,922 | 1 | 0 | 1 | 0 |
| Case 83 | 11 | 103,349,966 | 108,032,167 | 1 | 1 | 2 | 0 |
| Case 83 | 11 | 108,032,233 | 108,198,384 | 1 | 0 | 1 | 0 |
| Case 83 | 11 | 108,198,391 | 134,934,063 | 1 | 1 | 2 | 0 |
| Case 83 | 12 | 191,619     | 341,392     | 3 | 1 | 4 | 0 |
| Case 83 | 12 | 344,274     | 3,047,450   | 2 | 1 | 3 | 0 |
| Case 83 | 12 | 3,047,466   | 3,049,698   | 1 | 1 | 2 | 0 |
| Case 83 | 12 | 3,049,797   | 5,785,484   | 3 | 1 | 4 | 0 |
| Case 83 | 12 | 5,787,341   | 7,586,017   | 2 | 1 | 3 | 0 |
| Case 83 | 12 | 7,586,047   | 7,586,595   | 1 | 1 | 2 | 0 |
| Case 83 | 12 | 7,587,534   | 24,838,934  | 3 | 1 | 4 | 0 |
| Case 83 | 12 | 24,843,578  | 34,853,011  | 1 | 1 | 2 | 0 |
| Case 83 | 12 | 37,876,400  | 75,900,262  | 1 | 1 | 2 | 0 |
| Case 83 | 12 | 75,900,382  | 75,902,185  | 7 | 0 | 7 | 1 |
| Case 83 | 12 | 75,910,307  | 133,810,935 | 1 | 1 | 2 | 0 |
| Case 83 | 13 | 19,058,717  | 22,368,915  | 1 | 1 | 2 | 0 |
| Case 83 | 13 | 22,369,044  | 108,843,511 | 3 | 0 | 3 | 1 |
| Case 83 | 13 | 108,845,002 | 109,811,511 | 1 | 1 | 2 | 0 |
| Case 83 | 13 | 109,813,327 | 110,720,314 | 7 | 0 | 7 | 1 |
| Case 83 | 13 | 110,723,649 | 115,103,529 | 1 | 1 | 2 | 0 |
| Case 83 | 14 | 19,280,733  | 19,401,281  | 1 | 1 | 2 | 0 |
| Case 83 | 14 | 19,464,123  | 20,420,338  | 0 | 0 | 0 | 0 |
| Case 83 | 14 | 20,425,051  | 22,354,769  | 1 | 1 | 2 | 0 |
| Case 83 | 14 | 22,355,369  | 22,694,926  | 1 | 0 | 1 | 0 |
| Case 83 | 14 | 22,697,674  | 23,019,932  | 2 | 0 | 2 | 1 |
| Case 83 | 14 | 23,020,638  | 35,137,417  | 1 | 1 | 2 | 0 |
| Case 83 | 14 | 35,139,380  | 35,704,667  | 1 | 0 | 1 | 0 |
| Case 83 | 14 | 35,707,939  | 45,431,637  | 1 | 1 | 2 | 0 |
| Case 83 | 14 | 45,431,698  | 45,716,411  | 1 | 0 | 1 | 0 |
| Case 83 | 14 | 45,719,643  | 58,669,403  | 1 | 1 | 2 | 0 |
| Case 83 | 14 | 58,669,409  | 59,006,831  | 1 | 0 | 1 | 0 |
| Case 83 | 14 | 59,013,971  | 92,403,294  | 1 | 1 | 2 | 0 |
| Case 83 | 14 | 92,403,660  | 92,638,468  | 1 | 0 | 1 | 0 |
| Case 83 | 14 | 92,647,042  | 94,594,139  | 2 | 0 | 2 | 1 |
| Case 83 | 14 | 94,594,327  | 94,770,808  | 1 | 0 | 1 | 0 |
| Case 83 | 14 | 94,770,990  | 96,730,074  | 2 | 0 | 2 | 1 |
| Case 83 | 14 | 96,730,141  | 96,883,969  | 1 | 0 | 1 | 0 |
| Case 83 | 14 | 96,885,459  | 102,698,996 | 2 | 0 | 2 | 1 |
| Case 83 | 14 | 102,698,999 | 104,646,027 | 1 | 0 | 1 | 0 |
| Case 83 | 14 | 104,646,102 | 105,236,727 | 2 | 0 | 2 | 1 |
| Case 83 | 14 | 105,236,732 | 107,287,663 | 1 | 0 | 1 | 0 |
| Case 83 | 15 | 20,034,919  | 40,866,353  | 1 | 1 | 2 | 0 |
| Case 83 | 15 | 40,866,357  | 41,011,016  | 1 | 0 | 1 | 0 |
| Case 83 | 15 | 41,026,994  | 50,731,390  | 1 | 1 | 2 | 0 |
| Case 83 | 15 | 50,741,068  | 51,132,170  | 1 | 0 | 1 | 0 |
| Case 83 | 15 | 51,155,225  | 102,461,162 | 1 | 1 | 2 | 0 |

|         |    |            |            |   |   |   |   |
|---------|----|------------|------------|---|---|---|---|
| Case 83 | 16 | 88,165     | 7,299,366  | 1 | 1 | 2 | 0 |
| Case 83 | 16 | 7,302,321  | 7,759,999  | 2 | 1 | 3 | 0 |
| Case 83 | 16 | 7,760,884  | 20,380,906 | 1 | 1 | 2 | 0 |
| Case 83 | 16 | 20,380,937 | 21,094,849 | 2 | 1 | 3 | 0 |
| Case 83 | 16 | 21,095,370 | 35,285,582 | 1 | 1 | 2 | 0 |
| Case 83 | 16 | 46,450,037 | 51,322,720 | 1 | 1 | 2 | 0 |
| Case 83 | 16 | 51,323,671 | 51,790,815 | 2 | 1 | 3 | 0 |
| Case 83 | 16 | 51,795,920 | 54,104,656 | 1 | 1 | 2 | 0 |
| Case 83 | 16 | 54,108,123 | 62,052,582 | 2 | 0 | 2 | 1 |
| Case 83 | 16 | 62,055,223 | 64,206,818 | 1 | 0 | 1 | 0 |
| Case 83 | 16 | 64,207,981 | 67,028,008 | 2 | 0 | 2 | 1 |
| Case 83 | 16 | 67,034,867 | 68,260,321 | 1 | 0 | 1 | 0 |
| Case 83 | 16 | 68,261,434 | 71,149,676 | 2 | 0 | 2 | 1 |
| Case 83 | 16 | 71,158,111 | 71,961,563 | 1 | 0 | 1 | 0 |
| Case 83 | 16 | 71,961,906 | 73,833,764 | 2 | 0 | 2 | 1 |
| Case 83 | 16 | 73,835,699 | 74,997,192 | 1 | 0 | 1 | 0 |
| Case 83 | 16 | 74,999,712 | 78,902,681 | 2 | 0 | 2 | 1 |
| Case 83 | 16 | 78,903,101 | 79,025,066 | 1 | 0 | 1 | 0 |
| Case 83 | 16 | 79,026,011 | 88,475,508 | 2 | 0 | 2 | 1 |
| Case 83 | 16 | 88,476,047 | 90,274,695 | 1 | 0 | 1 | 0 |
| Case 83 | 17 | 11,885     | 1,487,771  | 1 | 1 | 2 | 0 |
| Case 83 | 17 | 1,489,226  | 1,641,276  | 1 | 0 | 1 | 0 |
| Case 83 | 17 | 1,641,806  | 10,295,497 | 1 | 1 | 2 | 0 |
| Case 83 | 17 | 10,295,882 | 10,436,860 | 1 | 0 | 1 | 0 |
| Case 83 | 17 | 10,436,864 | 19,652,676 | 1 | 1 | 2 | 0 |
| Case 83 | 17 | 19,656,093 | 20,872,331 | 1 | 0 | 1 | 0 |
| Case 83 | 17 | 20,878,744 | 22,242,355 | 1 | 1 | 2 | 0 |
| Case 83 | 17 | 25,268,142 | 25,650,739 | 1 | 1 | 2 | 0 |
| Case 83 | 17 | 25,659,288 | 28,165,974 | 2 | 1 | 3 | 0 |
| Case 83 | 17 | 28,182,685 | 29,785,370 | 1 | 1 | 2 | 0 |
| Case 83 | 17 | 29,796,197 | 45,043,508 | 2 | 1 | 3 | 0 |
| Case 83 | 17 | 45,050,533 | 45,777,015 | 1 | 1 | 2 | 0 |
| Case 83 | 17 | 45,777,972 | 57,079,022 | 2 | 1 | 3 | 0 |
| Case 83 | 17 | 57,093,035 | 59,279,706 | 1 | 1 | 2 | 0 |
| Case 83 | 17 | 59,282,508 | 59,668,021 | 2 | 1 | 3 | 0 |
| Case 83 | 17 | 59,668,229 | 60,485,399 | 1 | 1 | 2 | 0 |
| Case 83 | 17 | 60,485,723 | 73,494,391 | 2 | 1 | 3 | 0 |
| Case 83 | 17 | 73,494,400 | 74,077,797 | 1 | 1 | 2 | 0 |
| Case 83 | 17 | 74,077,830 | 77,912,761 | 2 | 1 | 3 | 0 |
| Case 83 | 17 | 77,912,888 | 78,198,750 | 1 | 1 | 2 | 0 |
| Case 83 | 17 | 78,199,666 | 78,965,434 | 2 | 1 | 3 | 0 |
| Case 83 | 17 | 78,966,915 | 80,538,946 | 1 | 1 | 2 | 0 |
| Case 83 | 17 | 80,541,944 | 80,545,133 | 4 | 3 | 7 | 0 |
| Case 83 | 17 | 80,545,156 | 80,615,643 | 1 | 1 | 2 | 0 |
| Case 83 | 17 | 80,615,788 | 81,060,040 | 2 | 1 | 3 | 0 |
| Case 83 | 18 | 87,505     | 2,021,735  | 1 | 0 | 1 | 0 |
| Case 83 | 18 | 2,027,294  | 2,424,195  | 1 | 1 | 2 | 0 |
| Case 83 | 18 | 2,425,172  | 2,872,586  | 1 | 0 | 1 | 0 |
| Case 83 | 18 | 2,873,083  | 15,375,878 | 1 | 1 | 2 | 0 |
| Case 83 | 18 | 18,520,354 | 27,667,312 | 1 | 1 | 2 | 0 |
| Case 83 | 18 | 27,676,662 | 28,935,694 | 2 | 0 | 2 | 1 |
| Case 83 | 18 | 28,936,574 | 33,750,976 | 1 | 0 | 1 | 0 |
| Case 83 | 18 | 33,751,012 | 43,438,605 | 2 | 0 | 2 | 1 |
| Case 83 | 18 | 43,438,739 | 43,864,568 | 1 | 0 | 1 | 0 |
| Case 83 | 18 | 43,866,158 | 50,768,168 | 2 | 0 | 2 | 1 |
| Case 83 | 18 | 50,769,543 | 53,606,519 | 1 | 0 | 1 | 0 |
| Case 83 | 18 | 53,613,203 | 55,252,613 | 2 | 0 | 2 | 1 |
| Case 83 | 18 | 55,257,063 | 55,436,072 | 1 | 0 | 1 | 0 |
| Case 83 | 18 | 55,440,607 | 57,594,864 | 2 | 0 | 2 | 1 |
| Case 83 | 18 | 57,598,173 | 58,310,604 | 1 | 0 | 1 | 0 |
| Case 83 | 18 | 58,312,626 | 59,583,446 | 2 | 0 | 2 | 1 |

|         |    |            |            |   |   |   |   |
|---------|----|------------|------------|---|---|---|---|
| Case 83 | 18 | 59,583,694 | 60,148,088 | 1 | 0 | 1 | 0 |
| Case 83 | 18 | 60,148,485 | 61,024,122 | 2 | 0 | 2 | 1 |
| Case 83 | 18 | 61,029,511 | 66,480,748 | 1 | 0 | 1 | 0 |
| Case 83 | 18 | 66,481,273 | 68,477,007 | 2 | 0 | 2 | 1 |
| Case 83 | 18 | 68,477,432 | 69,838,830 | 1 | 0 | 1 | 0 |
| Case 83 | 18 | 69,840,376 | 74,449,883 | 2 | 0 | 2 | 1 |
| Case 83 | 18 | 74,450,640 | 74,694,985 | 1 | 0 | 1 | 0 |
| Case 83 | 18 | 74,695,777 | 75,982,660 | 2 | 0 | 2 | 1 |
| Case 83 | 18 | 75,983,084 | 76,315,261 | 1 | 0 | 1 | 0 |
| Case 83 | 18 | 76,317,644 | 76,715,856 | 2 | 0 | 2 | 1 |
| Case 83 | 18 | 76,732,221 | 77,134,275 | 1 | 0 | 1 | 0 |
| Case 83 | 18 | 77,138,035 | 78,015,180 | 2 | 0 | 2 | 1 |
| Case 83 | 19 | 260,912    | 422,171    | 1 | 1 | 2 | 0 |
| Case 83 | 19 | 422,199    | 1,756,939  | 1 | 0 | 1 | 0 |
| Case 83 | 19 | 1,763,776  | 2,353,090  | 1 | 1 | 2 | 0 |
| Case 83 | 19 | 2,353,114  | 2,994,946  | 1 | 0 | 1 | 0 |
| Case 83 | 19 | 2,994,967  | 4,445,559  | 1 | 1 | 2 | 0 |
| Case 83 | 19 | 4,445,581  | 4,550,812  | 1 | 0 | 1 | 0 |
| Case 83 | 19 | 4,550,817  | 8,037,040  | 1 | 1 | 2 | 0 |
| Case 83 | 19 | 8,038,656  | 8,188,812  | 1 | 0 | 1 | 0 |
| Case 83 | 19 | 8,188,820  | 9,226,055  | 1 | 1 | 2 | 0 |
| Case 83 | 19 | 9,226,075  | 10,050,184 | 1 | 0 | 1 | 0 |
| Case 83 | 19 | 10,059,428 | 11,658,682 | 1 | 1 | 2 | 0 |
| Case 83 | 19 | 11,660,167 | 12,722,332 | 1 | 0 | 1 | 0 |
| Case 83 | 19 | 12,724,645 | 19,772,856 | 1 | 1 | 2 | 0 |
| Case 83 | 19 | 19,776,814 | 24,629,285 | 1 | 0 | 1 | 0 |
| Case 83 | 19 | 27,732,159 | 28,329,411 | 1 | 0 | 1 | 0 |
| Case 83 | 19 | 28,332,369 | 36,674,347 | 1 | 1 | 2 | 0 |
| Case 83 | 19 | 36,674,390 | 38,266,082 | 1 | 0 | 1 | 0 |
| Case 83 | 19 | 38,270,163 | 40,501,915 | 1 | 1 | 2 | 0 |
| Case 83 | 19 | 40,502,919 | 40,720,381 | 1 | 0 | 1 | 0 |
| Case 83 | 19 | 40,720,883 | 41,341,589 | 1 | 1 | 2 | 0 |
| Case 83 | 19 | 41,350,895 | 41,392,885 | 0 | 0 | 0 | 0 |
| Case 83 | 19 | 41,393,760 | 44,342,977 | 1 | 1 | 2 | 0 |
| Case 83 | 19 | 44,348,824 | 45,011,727 | 1 | 0 | 1 | 0 |
| Case 83 | 19 | 45,013,262 | 52,430,739 | 1 | 1 | 2 | 0 |
| Case 83 | 19 | 52,432,715 | 54,121,675 | 1 | 0 | 1 | 0 |
| Case 83 | 19 | 54,123,328 | 54,803,022 | 1 | 1 | 2 | 0 |
| Case 83 | 19 | 54,803,141 | 54,803,664 | 7 | 0 | 7 | 1 |
| Case 83 | 19 | 54,804,167 | 56,903,491 | 1 | 1 | 2 | 0 |
| Case 83 | 19 | 56,903,669 | 57,132,456 | 1 | 0 | 1 | 0 |
| Case 83 | 19 | 57,132,677 | 57,867,889 | 1 | 1 | 2 | 0 |
| Case 83 | 19 | 57,867,958 | 58,815,853 | 1 | 0 | 1 | 0 |
| Case 83 | 19 | 58,819,113 | 59,097,160 | 1 | 1 | 2 | 0 |
| Case 83 | 20 | 63,244     | 9,448,947  | 1 | 1 | 2 | 0 |
| Case 83 | 20 | 9,450,367  | 9,631,499  | 2 | 1 | 3 | 0 |
| Case 83 | 20 | 9,632,609  | 15,395,647 | 1 | 1 | 2 | 0 |
| Case 83 | 20 | 15,397,928 | 16,003,225 | 3 | 1 | 4 | 0 |
| Case 83 | 20 | 16,005,680 | 26,293,985 | 1 | 1 | 2 | 0 |
| Case 83 | 20 | 29,425,357 | 31,644,520 | 1 | 1 | 2 | 0 |
| Case 83 | 20 | 31,646,528 | 31,870,290 | 2 | 1 | 3 | 0 |
| Case 83 | 20 | 31,873,994 | 62,948,788 | 1 | 1 | 2 | 0 |
| Case 83 | 21 | 10,827,533 | 10,970,025 | 1 | 1 | 2 | 0 |
| Case 83 | 21 | 10,971,325 | 10,971,337 | 1 | 0 | 1 | 0 |
| Case 83 | 21 | 14,368,320 | 30,881,184 | 1 | 0 | 1 | 0 |
| Case 83 | 21 | 30,883,135 | 33,642,837 | 1 | 1 | 2 | 0 |
| Case 83 | 21 | 33,643,161 | 35,186,357 | 1 | 0 | 1 | 0 |
| Case 83 | 21 | 35,186,743 | 40,496,479 | 1 | 1 | 2 | 0 |
| Case 83 | 21 | 40,498,014 | 40,885,108 | 1 | 0 | 1 | 0 |
| Case 83 | 21 | 40,887,185 | 43,954,850 | 1 | 1 | 2 | 0 |
| Case 83 | 21 | 43,955,644 | 46,320,279 | 1 | 0 | 1 | 0 |



|         |    |             |             |   |   |   |   |
|---------|----|-------------|-------------|---|---|---|---|
| Case 83 | 21 | 46,320,285  | 46,895,394  | 1 | 1 | 2 | 0 |
| Case 83 | 21 | 46,896,312  | 48,100,155  | 1 | 0 | 1 | 0 |
| Case 83 | 22 | 16,114,244  | 25,658,525  | 1 | 1 | 2 | 0 |
| Case 83 | 22 | 25,661,725  | 25,910,879  | 0 | 0 | 0 | 0 |
| Case 83 | 22 | 25,914,593  | 51,195,728  | 1 | 1 | 2 | 0 |
| Case 84 | 1  | 82,154      | 1,970,444   | 2 | 1 | 3 | 0 |
| Case 84 | 1  | 1,981,118   | 2,263,888   | 2 | 2 | 4 | 0 |
| Case 84 | 1  | 2,265,969   | 8,816,438   | 2 | 1 | 3 | 0 |
| Case 84 | 1  | 8,831,283   | 8,949,480   | 2 | 2 | 4 | 0 |
| Case 84 | 1  | 8,952,029   | 9,009,406   | 4 | 1 | 5 | 0 |
| Case 84 | 1  | 9,009,414   | 12,164,451  | 2 | 1 | 3 | 0 |
| Case 84 | 1  | 12,166,855  | 12,329,295  | 4 | 0 | 4 | 1 |
| Case 84 | 1  | 12,333,084  | 12,343,030  | 3 | 1 | 4 | 0 |
| Case 84 | 1  | 12,343,493  | 15,687,814  | 2 | 1 | 3 | 0 |
| Case 84 | 1  | 15,689,182  | 16,129,320  | 2 | 2 | 4 | 0 |
| Case 84 | 1  | 16,134,072  | 16,272,694  | 2 | 1 | 3 | 0 |
| Case 84 | 1  | 16,273,507  | 16,654,994  | 2 | 2 | 4 | 0 |
| Case 84 | 1  | 16,656,518  | 23,234,569  | 2 | 1 | 3 | 0 |
| Case 84 | 1  | 23,238,023  | 23,435,669  | 4 | 1 | 5 | 0 |
| Case 84 | 1  | 23,464,974  | 31,769,528  | 2 | 1 | 3 | 0 |
| Case 84 | 1  | 31,770,944  | 31,909,124  | 4 | 1 | 5 | 0 |
| Case 84 | 1  | 31,910,482  | 32,050,843  | 5 | 1 | 6 | 0 |
| Case 84 | 1  | 32,051,421  | 59,286,691  | 2 | 1 | 3 | 0 |
| Case 84 | 1  | 59,301,218  | 59,470,439  | 4 | 1 | 5 | 0 |
| Case 84 | 1  | 59,470,494  | 60,099,282  | 2 | 1 | 3 | 0 |
| Case 84 | 1  | 60,100,662  | 60,506,744  | 4 | 1 | 5 | 0 |
| Case 84 | 1  | 60,506,761  | 121,346,616 | 2 | 1 | 3 | 0 |
| Case 84 | 1  | 142,649,718 | 157,095,853 | 2 | 1 | 3 | 0 |
| Case 84 | 1  | 157,101,245 | 157,197,805 | 4 | 1 | 5 | 0 |
| Case 84 | 1  | 157,202,651 | 161,133,373 | 2 | 1 | 3 | 0 |
| Case 84 | 1  | 161,134,498 | 162,600,914 | 2 | 2 | 4 | 0 |
| Case 84 | 1  | 162,602,394 | 171,543,476 | 2 | 1 | 3 | 0 |
| Case 84 | 1  | 171,543,863 | 171,684,506 | 4 | 1 | 5 | 0 |
| Case 84 | 1  | 171,688,351 | 173,187,264 | 2 | 1 | 3 | 0 |
| Case 84 | 1  | 173,189,389 | 175,355,368 | 2 | 0 | 2 | 1 |
| Case 84 | 1  | 175,355,391 | 175,850,011 | 3 | 0 | 3 | 1 |
| Case 84 | 1  | 175,852,209 | 177,723,089 | 2 | 0 | 2 | 1 |
| Case 84 | 1  | 177,737,303 | 177,986,454 | 3 | 0 | 3 | 1 |
| Case 84 | 1  | 177,989,198 | 178,429,171 | 2 | 0 | 2 | 1 |
| Case 84 | 1  | 178,435,086 | 178,532,188 | 4 | 0 | 4 | 1 |
| Case 84 | 1  | 178,532,223 | 180,067,988 | 2 | 0 | 2 | 1 |
| Case 84 | 1  | 180,075,388 | 180,692,326 | 3 | 0 | 3 | 1 |
| Case 84 | 1  | 180,692,815 | 182,026,013 | 2 | 0 | 2 | 1 |
| Case 84 | 1  | 182,026,052 | 182,474,160 | 3 | 0 | 3 | 1 |
| Case 84 | 1  | 182,474,704 | 182,556,036 | 2 | 0 | 2 | 1 |
| Case 84 | 1  | 182,559,510 | 182,740,955 | 3 | 0 | 3 | 1 |
| Case 84 | 1  | 182,744,205 | 183,835,838 | 2 | 0 | 2 | 1 |
| Case 84 | 1  | 183,837,032 | 183,914,681 | 3 | 0 | 3 | 1 |
| Case 84 | 1  | 183,918,161 | 197,913,157 | 2 | 0 | 2 | 1 |
| Case 84 | 1  | 197,919,693 | 198,043,697 | 3 | 0 | 3 | 1 |
| Case 84 | 1  | 198,044,170 | 201,070,740 | 2 | 0 | 2 | 1 |
| Case 84 | 1  | 201,071,790 | 201,133,774 | 3 | 0 | 3 | 1 |
| Case 84 | 1  | 201,133,955 | 201,981,129 | 2 | 0 | 2 | 1 |
| Case 84 | 1  | 201,981,130 | 202,095,590 | 3 | 0 | 3 | 1 |
| Case 84 | 1  | 202,096,815 | 202,947,596 | 2 | 0 | 2 | 1 |
| Case 84 | 1  | 202,948,507 | 203,680,420 | 3 | 0 | 3 | 1 |
| Case 84 | 1  | 203,680,492 | 204,069,838 | 2 | 0 | 2 | 1 |
| Case 84 | 1  | 204,070,007 | 204,359,597 | 3 | 0 | 3 | 1 |
| Case 84 | 1  | 204,365,749 | 204,989,163 | 2 | 0 | 2 | 1 |
| Case 84 | 1  | 204,998,375 | 205,306,102 | 4 | 0 | 4 | 1 |
| Case 84 | 1  | 205,306,592 | 205,461,563 | 3 | 1 | 4 | 0 |

|         |   |             |             |   |   |   |   |
|---------|---|-------------|-------------|---|---|---|---|
| Case 84 | 1 | 205,462,914 | 217,804,722 | 2 | 1 | 3 | 0 |
| Case 84 | 1 | 217,804,724 | 245,600,808 | 2 | 2 | 4 | 0 |
| Case 84 | 1 | 245,608,819 | 245,655,241 | 2 | 0 | 2 | 1 |
| Case 84 | 1 | 245,663,519 | 246,229,245 | 2 | 2 | 4 | 0 |
| Case 84 | 1 | 246,234,124 | 246,303,128 | 2 | 1 | 3 | 0 |
| Case 84 | 1 | 246,308,279 | 247,419,951 | 2 | 2 | 4 | 0 |
| Case 84 | 1 | 247,420,167 | 247,581,209 | 2 | 0 | 2 | 1 |
| Case 84 | 1 | 247,582,305 | 247,619,310 | 3 | 0 | 3 | 1 |
| Case 84 | 1 | 247,622,874 | 247,752,109 | 2 | 0 | 2 | 1 |
| Case 84 | 1 | 247,752,161 | 247,799,606 | 3 | 0 | 3 | 1 |
| Case 84 | 1 | 247,813,465 | 248,512,573 | 2 | 0 | 2 | 1 |
| Case 84 | 1 | 248,512,652 | 249,089,971 | 3 | 0 | 3 | 1 |
| Case 84 | 1 | 249,098,988 | 249,218,992 | 2 | 0 | 2 | 1 |
| Case 84 | 2 | 18,674      | 9,797,196   | 2 | 0 | 2 | 1 |
| Case 84 | 2 | 9,797,994   | 9,948,404   | 3 | 0 | 3 | 1 |
| Case 84 | 2 | 9,949,464   | 11,385,834  | 2 | 0 | 2 | 1 |
| Case 84 | 2 | 11,389,842  | 11,710,716  | 4 | 0 | 4 | 1 |
| Case 84 | 2 | 11,715,542  | 11,794,196  | 3 | 0 | 3 | 1 |
| Case 84 | 2 | 11,796,361  | 20,166,628  | 2 | 0 | 2 | 1 |
| Case 84 | 2 | 20,173,255  | 20,452,868  | 4 | 0 | 4 | 1 |
| Case 84 | 2 | 20,453,591  | 20,705,910  | 2 | 0 | 2 | 1 |
| Case 84 | 2 | 20,706,742  | 20,870,361  | 3 | 0 | 3 | 1 |
| Case 84 | 2 | 20,870,688  | 23,689,034  | 2 | 0 | 2 | 1 |
| Case 84 | 2 | 23,692,679  | 23,956,799  | 3 | 0 | 3 | 1 |
| Case 84 | 2 | 23,958,164  | 24,205,852  | 2 | 0 | 2 | 1 |
| Case 84 | 2 | 24,222,712  | 24,256,071  | 4 | 0 | 4 | 1 |
| Case 84 | 2 | 24,260,578  | 24,807,533  | 2 | 0 | 2 | 1 |
| Case 84 | 2 | 24,810,255  | 26,748,504  | 2 | 2 | 4 | 0 |
| Case 84 | 2 | 26,750,758  | 27,898,405  | 2 | 1 | 3 | 0 |
| Case 84 | 2 | 27,900,784  | 28,394,293  | 2 | 2 | 4 | 0 |
| Case 84 | 2 | 28,398,324  | 28,498,321  | 3 | 1 | 4 | 0 |
| Case 84 | 2 | 28,510,347  | 28,674,572  | 4 | 2 | 6 | 0 |
| Case 84 | 2 | 28,683,174  | 28,714,750  | 4 | 0 | 4 | 1 |
| Case 84 | 2 | 28,716,955  | 38,268,718  | 2 | 2 | 4 | 0 |
| Case 84 | 2 | 38,272,672  | 38,404,386  | 4 | 1 | 5 | 0 |
| Case 84 | 2 | 38,405,869  | 38,405,869  | 2 | 1 | 3 | 0 |
| Case 84 | 2 | 38,407,719  | 42,990,237  | 2 | 2 | 4 | 0 |
| Case 84 | 2 | 42,990,344  | 43,082,205  | 2 | 1 | 3 | 0 |
| Case 84 | 2 | 43,082,246  | 53,882,527  | 2 | 2 | 4 | 0 |
| Case 84 | 2 | 53,886,799  | 54,260,132  | 2 | 1 | 3 | 0 |
| Case 84 | 2 | 54,268,750  | 54,995,746  | 4 | 1 | 5 | 0 |
| Case 84 | 2 | 55,001,405  | 55,001,405  | 2 | 1 | 3 | 0 |
| Case 84 | 2 | 55,003,244  | 69,817,188  | 2 | 2 | 4 | 0 |
| Case 84 | 2 | 69,824,151  | 69,851,974  | 2 | 1 | 3 | 0 |
| Case 84 | 2 | 69,863,423  | 70,128,346  | 4 | 2 | 6 | 0 |
| Case 84 | 2 | 70,141,146  | 70,152,957  | 4 | 0 | 4 | 1 |
| Case 84 | 2 | 70,153,848  | 88,828,791  | 2 | 2 | 4 | 0 |
| Case 84 | 2 | 88,828,847  | 92,081,640  | 2 | 1 | 3 | 0 |
| Case 84 | 2 | 95,429,424  | 96,993,745  | 2 | 1 | 3 | 0 |
| Case 84 | 2 | 96,993,757  | 97,267,898  | 2 | 2 | 4 | 0 |
| Case 84 | 2 | 97,268,597  | 120,343,832 | 2 | 1 | 3 | 0 |
| Case 84 | 2 | 120,345,917 | 120,496,519 | 2 | 2 | 4 | 0 |
| Case 84 | 2 | 120,498,760 | 121,052,324 | 2 | 1 | 3 | 0 |
| Case 84 | 2 | 121,058,412 | 122,055,684 | 2 | 2 | 4 | 0 |
| Case 84 | 2 | 122,063,844 | 134,899,485 | 2 | 1 | 3 | 0 |
| Case 84 | 2 | 134,901,659 | 135,012,114 | 2 | 0 | 2 | 1 |
| Case 84 | 2 | 135,017,074 | 141,975,850 | 2 | 1 | 3 | 0 |
| Case 84 | 2 | 141,976,620 | 144,155,919 | 2 | 2 | 4 | 0 |
| Case 84 | 2 | 144,157,738 | 206,630,213 | 2 | 1 | 3 | 0 |
| Case 84 | 2 | 206,630,887 | 206,736,522 | 2 | 2 | 4 | 0 |
| Case 84 | 2 | 206,738,529 | 206,892,937 | 4 | 1 | 5 | 0 |

|         |   |             |             |   |   |   |   |
|---------|---|-------------|-------------|---|---|---|---|
| Case 84 | 2 | 206,893,042 | 239,172,863 | 2 | 1 | 3 | 0 |
| Case 84 | 2 | 239,176,386 | 239,318,389 | 2 | 2 | 4 | 0 |
| Case 84 | 2 | 239,322,485 | 243,048,760 | 2 | 1 | 3 | 0 |
| Case 84 | 3 | 61,495      | 9,985,656   | 3 | 0 | 3 | 1 |
| Case 84 | 3 | 9,985,673   | 9,986,249   | 2 | 0 | 2 | 1 |
| Case 84 | 3 | 9,988,044   | 10,335,786  | 4 | 0 | 4 | 1 |
| Case 84 | 3 | 10,341,082  | 44,704,083  | 3 | 0 | 3 | 1 |
| Case 84 | 3 | 44,712,097  | 44,852,434  | 2 | 0 | 2 | 1 |
| Case 84 | 3 | 44,852,497  | 48,759,562  | 3 | 0 | 3 | 1 |
| Case 84 | 3 | 48,787,219  | 49,136,359  | 1 | 0 | 1 | 0 |
| Case 84 | 3 | 49,136,421  | 49,200,259  | 2 | 0 | 2 | 1 |
| Case 84 | 3 | 49,200,573  | 50,478,487  | 1 | 0 | 1 | 0 |
| Case 84 | 3 | 50,480,863  | 50,720,909  | 2 | 0 | 2 | 1 |
| Case 84 | 3 | 50,772,664  | 51,772,347  | 1 | 0 | 1 | 0 |
| Case 84 | 3 | 51,802,912  | 52,384,054  | 4 | 0 | 4 | 1 |
| Case 84 | 3 | 52,384,594  | 52,556,651  | 3 | 2 | 5 | 0 |
| Case 84 | 3 | 52,557,059  | 54,486,790  | 4 | 0 | 4 | 1 |
| Case 84 | 3 | 54,501,086  | 60,364,830  | 3 | 0 | 3 | 1 |
| Case 84 | 3 | 60,370,362  | 60,550,891  | 0 | 0 | 0 | 0 |
| Case 84 | 3 | 60,554,521  | 60,600,915  | 3 | 0 | 3 | 1 |
| Case 84 | 3 | 60,602,816  | 60,630,360  | 0 | 0 | 0 | 0 |
| Case 84 | 3 | 60,631,936  | 61,287,140  | 3 | 0 | 3 | 1 |
| Case 84 | 3 | 61,289,533  | 64,344,544  | 2 | 0 | 2 | 1 |
| Case 84 | 3 | 64,348,954  | 64,710,021  | 3 | 0 | 3 | 1 |
| Case 84 | 3 | 64,710,253  | 65,523,923  | 2 | 0 | 2 | 1 |
| Case 84 | 3 | 65,530,706  | 65,846,859  | 3 | 0 | 3 | 1 |
| Case 84 | 3 | 65,847,080  | 90,439,303  | 2 | 0 | 2 | 1 |
| Case 84 | 3 | 90,442,925  | 90,442,925  | 3 | 0 | 3 | 1 |
| Case 84 | 3 | 93,537,290  | 94,596,072  | 3 | 0 | 3 | 1 |
| Case 84 | 3 | 94,601,094  | 97,059,115  | 2 | 0 | 2 | 1 |
| Case 84 | 3 | 97,062,536  | 97,960,399  | 2 | 1 | 3 | 0 |
| Case 84 | 3 | 97,961,301  | 98,217,042  | 2 | 0 | 2 | 1 |
| Case 84 | 3 | 98,217,050  | 100,991,546 | 2 | 1 | 3 | 0 |
| Case 84 | 3 | 100,994,497 | 101,177,848 | 2 | 0 | 2 | 1 |
| Case 84 | 3 | 101,211,487 | 101,630,232 | 3 | 0 | 3 | 1 |
| Case 84 | 3 | 101,632,783 | 101,723,923 | 2 | 2 | 4 | 0 |
| Case 84 | 3 | 101,724,478 | 101,968,917 | 4 | 1 | 5 | 0 |
| Case 84 | 3 | 101,988,001 | 102,457,118 | 3 | 1 | 4 | 0 |
| Case 84 | 3 | 102,467,051 | 111,901,099 | 3 | 0 | 3 | 1 |
| Case 84 | 3 | 111,918,215 | 111,923,210 | 0 | 0 | 0 | 0 |
| Case 84 | 3 | 111,927,115 | 127,387,987 | 3 | 0 | 3 | 1 |
| Case 84 | 3 | 127,387,989 | 127,474,030 | 3 | 1 | 4 | 0 |
| Case 84 | 3 | 127,474,541 | 127,642,806 | 4 | 2 | 6 | 0 |
| Case 84 | 3 | 127,642,814 | 127,651,629 | 3 | 2 | 5 | 0 |
| Case 84 | 3 | 127,655,873 | 127,983,506 | 2 | 1 | 3 | 0 |
| Case 84 | 3 | 127,991,527 | 128,276,332 | 3 | 1 | 4 | 0 |
| Case 84 | 3 | 128,278,803 | 128,527,929 | 4 | 0 | 4 | 1 |
| Case 84 | 3 | 128,532,174 | 142,664,512 | 3 | 0 | 3 | 1 |
| Case 84 | 3 | 142,666,745 | 142,994,194 | 3 | 1 | 4 | 0 |
| Case 84 | 3 | 142,994,822 | 143,007,402 | 4 | 0 | 4 | 1 |
| Case 84 | 3 | 143,009,413 | 160,601,327 | 3 | 0 | 3 | 1 |
| Case 84 | 3 | 160,616,852 | 161,616,585 | 3 | 1 | 4 | 0 |
| Case 84 | 3 | 161,620,429 | 161,625,084 | 4 | 0 | 4 | 1 |
| Case 84 | 3 | 161,633,104 | 168,093,655 | 3 | 0 | 3 | 1 |
| Case 84 | 3 | 168,125,439 | 169,693,451 | 3 | 1 | 4 | 0 |
| Case 84 | 3 | 169,697,376 | 170,075,246 | 4 | 0 | 4 | 1 |
| Case 84 | 3 | 170,077,713 | 197,838,262 | 3 | 0 | 3 | 1 |
| Case 84 | 4 | 71,566      | 150,683     | 2 | 0 | 2 | 1 |
| Case 84 | 4 | 154,839     | 438,080     | 1 | 0 | 1 | 0 |
| Case 84 | 4 | 442,021     | 494,194     | 2 | 0 | 2 | 1 |
| Case 84 | 4 | 497,138     | 2,692,479   | 2 | 1 | 3 | 0 |

|         |   |             |             |   |   |   |   |
|---------|---|-------------|-------------|---|---|---|---|
| Case 84 | 4 | 2,692,509   | 25,863,375  | 2 | 0 | 2 | 1 |
| Case 84 | 4 | 25,867,118  | 26,143,620  | 3 | 0 | 3 | 1 |
| Case 84 | 4 | 26,147,138  | 26,457,168  | 2 | 0 | 2 | 1 |
| Case 84 | 4 | 26,457,487  | 26,551,172  | 3 | 0 | 3 | 1 |
| Case 84 | 4 | 26,570,153  | 39,436,019  | 2 | 0 | 2 | 1 |
| Case 84 | 4 | 39,438,149  | 39,586,775  | 4 | 0 | 4 | 1 |
| Case 84 | 4 | 39,600,010  | 40,287,396  | 2 | 0 | 2 | 1 |
| Case 84 | 4 | 40,291,232  | 40,401,610  | 3 | 0 | 3 | 1 |
| Case 84 | 4 | 40,410,479  | 41,076,288  | 2 | 0 | 2 | 1 |
| Case 84 | 4 | 41,076,426  | 43,254,889  | 1 | 0 | 1 | 0 |
| Case 84 | 4 | 43,279,788  | 49,620,898  | 2 | 0 | 2 | 1 |
| Case 84 | 4 | 52,697,856  | 77,159,700  | 2 | 0 | 2 | 1 |
| Case 84 | 4 | 77,167,242  | 77,555,857  | 4 | 0 | 4 | 1 |
| Case 84 | 4 | 77,560,811  | 115,499,674 | 2 | 0 | 2 | 1 |
| Case 84 | 4 | 115,506,203 | 116,013,647 | 4 | 0 | 4 | 1 |
| Case 84 | 4 | 116,028,808 | 119,785,381 | 2 | 0 | 2 | 1 |
| Case 84 | 4 | 119,789,448 | 119,867,342 | 2 | 2 | 4 | 0 |
| Case 84 | 4 | 119,873,248 | 142,484,038 | 2 | 0 | 2 | 1 |
| Case 84 | 4 | 142,487,363 | 144,574,139 | 2 | 2 | 4 | 0 |
| Case 84 | 4 | 144,575,873 | 148,280,874 | 2 | 0 | 2 | 1 |
| Case 84 | 4 | 148,288,067 | 149,654,577 | 2 | 2 | 4 | 0 |
| Case 84 | 4 | 149,690,361 | 187,538,942 | 2 | 0 | 2 | 1 |
| Case 84 | 4 | 187,539,125 | 187,542,899 | 3 | 0 | 3 | 1 |
| Case 84 | 4 | 187,542,927 | 190,963,766 | 2 | 0 | 2 | 1 |
| Case 84 | 5 | 38,139      | 3,451,906   | 4 | 1 | 5 | 0 |
| Case 84 | 5 | 3,452,743   | 5,145,406   | 5 | 1 | 6 | 0 |
| Case 84 | 5 | 5,146,335   | 6,825,016   | 4 | 1 | 5 | 0 |
| Case 84 | 5 | 6,826,269   | 14,514,308  | 5 | 1 | 6 | 0 |
| Case 84 | 5 | 14,517,076  | 14,707,600  | 6 | 1 | 7 | 0 |
| Case 84 | 5 | 14,711,332  | 14,711,332  | 3 | 1 | 4 | 0 |
| Case 84 | 5 | 14,713,681  | 15,278,843  | 4 | 1 | 5 | 0 |
| Case 84 | 5 | 15,298,906  | 16,608,454  | 5 | 1 | 6 | 0 |
| Case 84 | 5 | 16,608,493  | 16,608,493  | 1 | 1 | 2 | 0 |
| Case 84 | 5 | 16,610,057  | 16,793,089  | 4 | 1 | 5 | 0 |
| Case 84 | 5 | 16,793,151  | 27,719,260  | 5 | 1 | 6 | 0 |
| Case 84 | 5 | 27,720,584  | 29,631,637  | 6 | 1 | 7 | 0 |
| Case 84 | 5 | 29,634,027  | 29,634,027  | 3 | 1 | 4 | 0 |
| Case 84 | 5 | 29,635,164  | 29,640,815  | 4 | 1 | 5 | 0 |
| Case 84 | 5 | 29,654,854  | 46,399,093  | 5 | 1 | 6 | 0 |
| Case 84 | 5 | 49,457,282  | 58,666,122  | 1 | 1 | 2 | 0 |
| Case 84 | 5 | 58,676,049  | 59,398,304  | 1 | 0 | 1 | 0 |
| Case 84 | 5 | 59,420,684  | 59,697,303  | 2 | 0 | 2 | 1 |
| Case 84 | 5 | 59,697,808  | 60,488,167  | 1 | 0 | 1 | 0 |
| Case 84 | 5 | 60,511,401  | 61,552,812  | 2 | 0 | 2 | 1 |
| Case 84 | 5 | 61,553,091  | 61,866,559  | 1 | 0 | 1 | 0 |
| Case 84 | 5 | 61,867,920  | 62,237,088  | 2 | 0 | 2 | 1 |
| Case 84 | 5 | 62,239,608  | 63,068,130  | 1 | 0 | 1 | 0 |
| Case 84 | 5 | 63,069,566  | 63,978,255  | 2 | 0 | 2 | 1 |
| Case 84 | 5 | 63,982,806  | 64,328,615  | 1 | 0 | 1 | 0 |
| Case 84 | 5 | 64,340,029  | 64,468,684  | 2 | 0 | 2 | 1 |
| Case 84 | 5 | 64,483,759  | 65,081,722  | 1 | 0 | 1 | 0 |
| Case 84 | 5 | 65,082,942  | 65,264,090  | 2 | 0 | 2 | 1 |
| Case 84 | 5 | 65,267,045  | 65,349,671  | 1 | 0 | 1 | 0 |
| Case 84 | 5 | 65,349,887  | 66,676,147  | 2 | 0 | 2 | 1 |
| Case 84 | 5 | 66,680,616  | 66,872,361  | 1 | 0 | 1 | 0 |
| Case 84 | 5 | 66,875,825  | 67,240,236  | 2 | 0 | 2 | 1 |
| Case 84 | 5 | 67,241,677  | 67,450,499  | 1 | 0 | 1 | 0 |
| Case 84 | 5 | 67,457,160  | 68,337,426  | 2 | 0 | 2 | 1 |
| Case 84 | 5 | 68,342,235  | 68,709,884  | 1 | 0 | 1 | 0 |
| Case 84 | 5 | 68,715,249  | 68,728,353  | 2 | 0 | 2 | 1 |
| Case 84 | 5 | 68,740,653  | 70,858,268  | 1 | 0 | 1 | 0 |

|         |   |             |             |   |   |   |   |
|---------|---|-------------|-------------|---|---|---|---|
| Case 84 | 5 | 70,860,663  | 72,294,458  | 2 | 0 | 2 | 1 |
| Case 84 | 5 | 72,295,577  | 72,387,486  | 1 | 0 | 1 | 0 |
| Case 84 | 5 | 72,400,190  | 72,579,043  | 2 | 0 | 2 | 1 |
| Case 84 | 5 | 72,579,933  | 72,742,882  | 2 | 1 | 3 | 0 |
| Case 84 | 5 | 72,750,163  | 73,434,500  | 1 | 1 | 2 | 0 |
| Case 84 | 5 | 73,435,250  | 74,434,718  | 2 | 1 | 3 | 0 |
| Case 84 | 5 | 74,436,574  | 74,907,412  | 1 | 1 | 2 | 0 |
| Case 84 | 5 | 74,925,162  | 77,280,135  | 2 | 1 | 3 | 0 |
| Case 84 | 5 | 77,282,521  | 77,739,350  | 1 | 1 | 2 | 0 |
| Case 84 | 5 | 77,759,362  | 104,371,350 | 2 | 1 | 3 | 0 |
| Case 84 | 5 | 104,373,380 | 104,688,954 | 1 | 1 | 2 | 0 |
| Case 84 | 5 | 104,690,464 | 106,230,898 | 2 | 1 | 3 | 0 |
| Case 84 | 5 | 106,241,073 | 106,400,536 | 4 | 1 | 5 | 0 |
| Case 84 | 5 | 106,415,368 | 108,766,142 | 2 | 1 | 3 | 0 |
| Case 84 | 5 | 108,784,799 | 112,200,359 | 2 | 0 | 2 | 1 |
| Case 84 | 5 | 112,204,896 | 132,971,131 | 2 | 1 | 3 | 0 |
| Case 84 | 5 | 132,971,697 | 132,971,697 | 4 | 0 | 4 | 1 |
| Case 84 | 5 | 132,975,474 | 133,120,623 | 3 | 1 | 4 | 0 |
| Case 84 | 5 | 133,127,733 | 133,942,665 | 2 | 1 | 3 | 0 |
| Case 84 | 5 | 133,943,185 | 134,223,664 | 1 | 1 | 2 | 0 |
| Case 84 | 5 | 134,223,691 | 139,930,736 | 2 | 1 | 3 | 0 |
| Case 84 | 5 | 139,931,384 | 139,931,384 | 1 | 1 | 2 | 0 |
| Case 84 | 5 | 139,931,607 | 139,931,740 | 0 | 0 | 0 | 0 |
| Case 84 | 5 | 139,936,760 | 139,940,288 | 2 | 0 | 2 | 1 |
| Case 84 | 5 | 139,940,337 | 141,318,216 | 2 | 1 | 3 | 0 |
| Case 84 | 5 | 141,324,623 | 141,336,965 | 1 | 1 | 2 | 0 |
| Case 84 | 5 | 141,337,002 | 141,555,464 | 1 | 0 | 1 | 0 |
| Case 84 | 5 | 141,555,515 | 142,264,406 | 2 | 0 | 2 | 1 |
| Case 84 | 5 | 142,270,301 | 149,753,900 | 2 | 1 | 3 | 0 |
| Case 84 | 5 | 149,754,216 | 149,937,739 | 2 | 2 | 4 | 0 |
| Case 84 | 5 | 149,946,821 | 162,719,547 | 2 | 1 | 3 | 0 |
| Case 84 | 5 | 162,722,554 | 162,989,613 | 1 | 1 | 2 | 0 |
| Case 84 | 5 | 162,989,974 | 164,056,594 | 2 | 1 | 3 | 0 |
| Case 84 | 5 | 164,071,553 | 165,063,884 | 1 | 1 | 2 | 0 |
| Case 84 | 5 | 165,065,045 | 166,268,144 | 2 | 1 | 3 | 0 |
| Case 84 | 5 | 166,268,258 | 166,471,331 | 1 | 1 | 2 | 0 |
| Case 84 | 5 | 166,473,150 | 168,869,424 | 2 | 1 | 3 | 0 |
| Case 84 | 5 | 168,870,650 | 169,028,316 | 1 | 1 | 2 | 0 |
| Case 84 | 5 | 169,028,346 | 178,054,930 | 2 | 1 | 3 | 0 |
| Case 84 | 5 | 178,062,743 | 178,405,729 | 1 | 1 | 2 | 0 |
| Case 84 | 5 | 178,406,388 | 178,419,000 | 2 | 1 | 3 | 0 |
| Case 84 | 5 | 178,421,770 | 178,516,483 | 1 | 1 | 2 | 0 |
| Case 84 | 5 | 178,539,382 | 178,918,122 | 2 | 1 | 3 | 0 |
| Case 84 | 5 | 178,921,861 | 179,163,986 | 1 | 1 | 2 | 0 |
| Case 84 | 5 | 179,166,974 | 179,663,458 | 2 | 1 | 3 | 0 |
| Case 84 | 5 | 179,665,354 | 179,745,858 | 1 | 1 | 2 | 0 |
| Case 84 | 5 | 179,745,901 | 180,693,127 | 2 | 1 | 3 | 0 |
| Case 84 | 6 | 108,666     | 25,701,484  | 2 | 1 | 3 | 0 |
| Case 84 | 6 | 25,701,495  | 25,850,094  | 2 | 2 | 4 | 0 |
| Case 84 | 6 | 25,850,845  | 31,608,595  | 2 | 1 | 3 | 0 |
| Case 84 | 6 | 31,609,166  | 31,733,544  | 2 | 2 | 4 | 0 |
| Case 84 | 6 | 31,733,650  | 32,752,049  | 2 | 1 | 3 | 0 |
| Case 84 | 6 | 32,752,139  | 32,823,567  | 2 | 2 | 4 | 0 |
| Case 84 | 6 | 32,823,948  | 32,831,247  | 2 | 1 | 3 | 0 |
| Case 84 | 6 | 32,832,667  | 33,043,930  | 2 | 2 | 4 | 0 |
| Case 84 | 6 | 33,044,257  | 47,251,827  | 2 | 1 | 3 | 0 |
| Case 84 | 6 | 47,251,900  | 47,541,893  | 4 | 1 | 5 | 0 |
| Case 84 | 6 | 47,541,940  | 58,752,089  | 2 | 1 | 3 | 0 |
| Case 84 | 6 | 61,891,118  | 101,090,550 | 2 | 1 | 3 | 0 |
| Case 84 | 6 | 101,091,434 | 101,109,175 | 2 | 0 | 2 | 1 |
| Case 84 | 6 | 101,147,095 | 101,556,289 | 1 | 0 | 1 | 0 |

|         |   |             |             |   |   |   |   |
|---------|---|-------------|-------------|---|---|---|---|
| Case 84 | 6 | 101,569,185 | 101,583,773 | 2 | 0 | 2 | 1 |
| Case 84 | 6 | 101,584,291 | 116,480,619 | 2 | 1 | 3 | 0 |
| Case 84 | 6 | 116,486,792 | 116,700,809 | 2 | 2 | 4 | 0 |
| Case 84 | 6 | 116,703,926 | 133,980,726 | 2 | 1 | 3 | 0 |
| Case 84 | 6 | 133,988,652 | 134,132,516 | 2 | 2 | 4 | 0 |
| Case 84 | 6 | 134,137,656 | 160,147,630 | 2 | 1 | 3 | 0 |
| Case 84 | 6 | 160,159,034 | 169,393,301 | 1 | 1 | 2 | 0 |
| Case 84 | 6 | 169,393,766 | 169,844,174 | 4 | 0 | 4 | 1 |
| Case 84 | 6 | 169,853,296 | 170,717,604 | 1 | 1 | 2 | 0 |
| Case 84 | 6 | 170,718,148 | 170,980,171 | 1 | 0 | 1 | 0 |
| Case 84 | 7 | 44,935      | 1,051,776   | 2 | 0 | 2 | 1 |
| Case 84 | 7 | 1,052,353   | 1,484,834   | 2 | 1 | 3 | 0 |
| Case 84 | 7 | 1,484,885   | 1,614,261   | 4 | 1 | 5 | 0 |
| Case 84 | 7 | 1,614,662   | 2,608,634   | 2 | 1 | 3 | 0 |
| Case 84 | 7 | 2,609,309   | 2,696,150   | 2 | 0 | 2 | 1 |
| Case 84 | 7 | 2,698,634   | 5,052,357   | 2 | 1 | 3 | 0 |
| Case 84 | 7 | 5,070,502   | 5,107,872   | 2 | 0 | 2 | 1 |
| Case 84 | 7 | 5,108,770   | 16,656,546  | 2 | 1 | 3 | 0 |
| Case 84 | 7 | 16,662,008  | 17,112,981  | 4 | 1 | 5 | 0 |
| Case 84 | 7 | 17,115,823  | 19,916,190  | 2 | 1 | 3 | 0 |
| Case 84 | 7 | 19,938,943  | 20,018,112  | 4 | 1 | 5 | 0 |
| Case 84 | 7 | 20,022,789  | 33,060,306  | 2 | 1 | 3 | 0 |
| Case 84 | 7 | 33,061,694  | 33,671,662  | 4 | 0 | 4 | 1 |
| Case 84 | 7 | 33,673,265  | 34,543,108  | 3 | 1 | 4 | 0 |
| Case 84 | 7 | 34,547,662  | 37,494,968  | 4 | 0 | 4 | 1 |
| Case 84 | 7 | 37,501,026  | 37,501,026  | 3 | 1 | 4 | 0 |
| Case 84 | 7 | 37,501,378  | 37,505,367  | 4 | 0 | 4 | 1 |
| Case 84 | 7 | 37,506,634  | 37,506,634  | 3 | 1 | 4 | 0 |
| Case 84 | 7 | 37,509,747  | 37,509,747  | 4 | 0 | 4 | 1 |
| Case 84 | 7 | 37,524,894  | 39,863,558  | 4 | 1 | 5 | 0 |
| Case 84 | 7 | 39,874,986  | 40,259,553  | 3 | 1 | 4 | 0 |
| Case 84 | 7 | 40,265,510  | 40,476,625  | 4 | 1 | 5 | 0 |
| Case 84 | 7 | 40,485,949  | 41,615,988  | 3 | 1 | 4 | 0 |
| Case 84 | 7 | 41,617,294  | 45,679,021  | 4 | 0 | 4 | 1 |
| Case 84 | 7 | 45,680,258  | 46,386,613  | 3 | 1 | 4 | 0 |
| Case 84 | 7 | 46,387,679  | 47,315,291  | 4 | 0 | 4 | 1 |
| Case 84 | 7 | 47,316,586  | 48,443,116  | 3 | 1 | 4 | 0 |
| Case 84 | 7 | 48,444,995  | 49,145,008  | 4 | 1 | 5 | 0 |
| Case 84 | 7 | 49,145,538  | 50,542,927  | 3 | 1 | 4 | 0 |
| Case 84 | 7 | 50,544,314  | 51,074,440  | 4 | 1 | 5 | 0 |
| Case 84 | 7 | 51,077,711  | 51,096,974  | 3 | 1 | 4 | 0 |
| Case 84 | 7 | 51,096,986  | 51,954,436  | 4 | 0 | 4 | 1 |
| Case 84 | 7 | 51,954,824  | 51,991,339  | 3 | 1 | 4 | 0 |
| Case 84 | 7 | 51,999,888  | 52,426,894  | 4 | 1 | 5 | 0 |
| Case 84 | 7 | 52,427,003  | 53,303,291  | 3 | 1 | 4 | 0 |
| Case 84 | 7 | 53,303,909  | 53,729,051  | 4 | 1 | 5 | 0 |
| Case 84 | 7 | 53,743,564  | 54,207,048  | 3 | 1 | 4 | 0 |
| Case 84 | 7 | 54,208,630  | 54,905,511  | 4 | 1 | 5 | 0 |
| Case 84 | 7 | 54,926,166  | 55,374,827  | 3 | 1 | 4 | 0 |
| Case 84 | 7 | 55,388,586  | 56,146,310  | 4 | 0 | 4 | 1 |
| Case 84 | 7 | 56,147,272  | 58,019,061  | 3 | 1 | 4 | 0 |
| Case 84 | 7 | 61,056,053  | 64,453,085  | 3 | 1 | 4 | 0 |
| Case 84 | 7 | 64,453,116  | 66,029,429  | 4 | 1 | 5 | 0 |
| Case 84 | 7 | 66,030,612  | 73,152,033  | 3 | 1 | 4 | 0 |
| Case 84 | 7 | 73,155,017  | 73,425,238  | 4 | 1 | 5 | 0 |
| Case 84 | 7 | 73,428,671  | 75,822,876  | 3 | 1 | 4 | 0 |
| Case 84 | 7 | 75,841,589  | 76,131,684  | 4 | 1 | 5 | 0 |
| Case 84 | 7 | 76,131,706  | 76,132,073  | 2 | 1 | 3 | 0 |
| Case 84 | 7 | 76,134,203  | 76,710,152  | 6 | 1 | 7 | 0 |
| Case 84 | 7 | 76,712,801  | 77,051,490  | 3 | 1 | 4 | 0 |
| Case 84 | 7 | 77,055,836  | 82,580,333  | 4 | 1 | 5 | 0 |

|         |   |             |             |   |   |   |   |
|---------|---|-------------|-------------|---|---|---|---|
| Case 84 | 7 | 82,580,374  | 82,584,637  | 3 | 1 | 4 | 0 |
| Case 84 | 7 | 82,585,002  | 88,956,699  | 4 | 1 | 5 | 0 |
| Case 84 | 7 | 88,962,700  | 89,011,745  | 3 | 1 | 4 | 0 |
| Case 84 | 7 | 89,016,595  | 96,503,974  | 4 | 1 | 5 | 0 |
| Case 84 | 7 | 96,508,334  | 100,275,813 | 3 | 1 | 4 | 0 |
| Case 84 | 7 | 100,276,821 | 100,423,365 | 4 | 1 | 5 | 0 |
| Case 84 | 7 | 100,431,980 | 102,624,395 | 3 | 1 | 4 | 0 |
| Case 84 | 7 | 102,625,043 | 104,411,976 | 4 | 1 | 5 | 0 |
| Case 84 | 7 | 104,413,055 | 105,741,200 | 3 | 1 | 4 | 0 |
| Case 84 | 7 | 105,755,794 | 107,342,392 | 4 | 1 | 5 | 0 |
| Case 84 | 7 | 107,342,451 | 107,872,866 | 3 | 1 | 4 | 0 |
| Case 84 | 7 | 107,872,877 | 110,780,471 | 4 | 1 | 5 | 0 |
| Case 84 | 7 | 110,811,863 | 110,836,294 | 1 | 1 | 2 | 0 |
| Case 84 | 7 | 110,840,236 | 110,949,566 | 1 | 0 | 1 | 0 |
| Case 84 | 7 | 110,968,770 | 111,044,377 | 4 | 0 | 4 | 1 |
| Case 84 | 7 | 111,053,822 | 111,069,946 | 1 | 1 | 2 | 0 |
| Case 84 | 7 | 111,073,710 | 123,977,335 | 4 | 1 | 5 | 0 |
| Case 84 | 7 | 123,983,095 | 124,300,762 | 3 | 1 | 4 | 0 |
| Case 84 | 7 | 124,300,842 | 126,811,206 | 4 | 1 | 5 | 0 |
| Case 84 | 7 | 126,827,871 | 127,737,045 | 3 | 1 | 4 | 0 |
| Case 84 | 7 | 127,739,666 | 128,348,405 | 4 | 1 | 5 | 0 |
| Case 84 | 7 | 128,353,840 | 132,532,731 | 3 | 1 | 4 | 0 |
| Case 84 | 7 | 132,536,559 | 133,573,039 | 4 | 1 | 5 | 0 |
| Case 84 | 7 | 133,580,445 | 135,439,915 | 3 | 1 | 4 | 0 |
| Case 84 | 7 | 135,441,131 | 137,272,621 | 4 | 1 | 5 | 0 |
| Case 84 | 7 | 137,283,212 | 140,563,901 | 3 | 1 | 4 | 0 |
| Case 84 | 7 | 140,566,146 | 141,341,613 | 2 | 1 | 3 | 0 |
| Case 84 | 7 | 141,348,813 | 141,774,290 | 4 | 1 | 5 | 0 |
| Case 84 | 7 | 141,777,292 | 142,505,154 | 5 | 1 | 6 | 0 |
| Case 84 | 7 | 142,508,376 | 143,709,935 | 4 | 1 | 5 | 0 |
| Case 84 | 7 | 143,716,265 | 143,875,539 | 5 | 1 | 6 | 0 |
| Case 84 | 7 | 143,951,888 | 146,305,323 | 2 | 1 | 3 | 0 |
| Case 84 | 7 | 146,311,684 | 146,389,259 | 3 | 3 | 6 | 0 |
| Case 84 | 7 | 146,392,116 | 146,677,310 | 2 | 1 | 3 | 0 |
| Case 84 | 7 | 146,682,211 | 147,006,000 | 2 | 2 | 4 | 0 |
| Case 84 | 7 | 147,008,093 | 151,491,136 | 2 | 1 | 3 | 0 |
| Case 84 | 7 | 151,496,826 | 151,660,361 | 2 | 2 | 4 | 0 |
| Case 84 | 7 | 151,662,184 | 155,946,592 | 2 | 1 | 3 | 0 |
| Case 84 | 7 | 155,952,990 | 156,470,258 | 2 | 2 | 4 | 0 |
| Case 84 | 7 | 156,471,867 | 159,119,486 | 2 | 1 | 3 | 0 |
| Case 84 | 8 | 164,984     | 8,485,387   | 2 | 0 | 2 | 1 |
| Case 84 | 8 | 8,487,486   | 9,154,537   | 3 | 0 | 3 | 1 |
| Case 84 | 8 | 9,154,694   | 10,540,767  | 2 | 0 | 2 | 1 |
| Case 84 | 8 | 10,540,931  | 10,583,616  | 3 | 0 | 3 | 1 |
| Case 84 | 8 | 10,583,778  | 11,430,485  | 2 | 0 | 2 | 1 |
| Case 84 | 8 | 11,433,909  | 11,615,928  | 3 | 0 | 3 | 1 |
| Case 84 | 8 | 11,616,338  | 17,301,152  | 2 | 0 | 2 | 1 |
| Case 84 | 8 | 17,302,931  | 17,564,973  | 3 | 0 | 3 | 1 |
| Case 84 | 8 | 17,565,118  | 22,389,818  | 2 | 0 | 2 | 1 |
| Case 84 | 8 | 22,390,450  | 22,650,358  | 3 | 0 | 3 | 1 |
| Case 84 | 8 | 22,653,377  | 23,182,268  | 2 | 0 | 2 | 1 |
| Case 84 | 8 | 23,183,869  | 23,237,547  | 3 | 0 | 3 | 1 |
| Case 84 | 8 | 23,237,983  | 26,472,655  | 2 | 0 | 2 | 1 |
| Case 84 | 8 | 26,473,403  | 26,628,028  | 3 | 0 | 3 | 1 |
| Case 84 | 8 | 26,628,318  | 27,157,307  | 2 | 0 | 2 | 1 |
| Case 84 | 8 | 27,159,459  | 27,337,507  | 3 | 0 | 3 | 1 |
| Case 84 | 8 | 27,337,791  | 27,630,152  | 2 | 0 | 2 | 1 |
| Case 84 | 8 | 27,633,972  | 27,645,704  | 1 | 0 | 1 | 0 |
| Case 84 | 8 | 27,649,495  | 36,861,905  | 2 | 0 | 2 | 1 |
| Case 84 | 8 | 36,865,149  | 37,396,693  | 3 | 0 | 3 | 1 |
| Case 84 | 8 | 37,399,290  | 43,791,691  | 2 | 0 | 2 | 1 |

|         |   |             |             |   |   |   |   |
|---------|---|-------------|-------------|---|---|---|---|
| Case 84 | 8 | 46,886,735  | 48,511,747  | 6 | 1 | 7 | 0 |
| Case 84 | 8 | 48,515,523  | 48,769,846  | 6 | 0 | 6 | 1 |
| Case 84 | 8 | 48,770,702  | 48,771,430  | 7 | 0 | 7 | 1 |
| Case 84 | 8 | 48,771,462  | 51,022,682  | 5 | 0 | 5 | 1 |
| Case 84 | 8 | 51,029,371  | 51,733,342  | 6 | 0 | 6 | 1 |
| Case 84 | 8 | 51,744,861  | 52,100,048  | 7 | 0 | 7 | 1 |
| Case 84 | 8 | 52,101,444  | 52,493,581  | 5 | 0 | 5 | 1 |
| Case 84 | 8 | 52,496,113  | 54,495,355  | 6 | 0 | 6 | 1 |
| Case 84 | 8 | 54,496,270  | 54,496,270  | 7 | 0 | 7 | 1 |
| Case 84 | 8 | 54,497,467  | 55,325,943  | 5 | 0 | 5 | 1 |
| Case 84 | 8 | 55,326,450  | 56,686,224  | 6 | 0 | 6 | 1 |
| Case 84 | 8 | 56,695,345  | 56,698,298  | 7 | 0 | 7 | 1 |
| Case 84 | 8 | 56,698,365  | 57,435,745  | 5 | 0 | 5 | 1 |
| Case 84 | 8 | 57,436,577  | 60,649,504  | 6 | 0 | 6 | 1 |
| Case 84 | 8 | 60,656,194  | 60,709,953  | 7 | 0 | 7 | 1 |
| Case 84 | 8 | 60,711,404  | 61,869,649  | 6 | 0 | 6 | 1 |
| Case 84 | 8 | 61,871,269  | 70,550,982  | 7 | 0 | 7 | 1 |
| Case 84 | 8 | 70,551,073  | 70,811,264  | 6 | 0 | 6 | 1 |
| Case 84 | 8 | 70,812,050  | 72,158,135  | 7 | 0 | 7 | 1 |
| Case 84 | 8 | 72,166,288  | 72,244,775  | 6 | 0 | 6 | 1 |
| Case 84 | 8 | 72,245,087  | 73,819,023  | 7 | 0 | 7 | 1 |
| Case 84 | 8 | 73,821,073  | 74,102,646  | 6 | 0 | 6 | 1 |
| Case 84 | 8 | 74,102,874  | 77,217,405  | 7 | 0 | 7 | 1 |
| Case 84 | 8 | 77,218,065  | 78,021,585  | 6 | 0 | 6 | 1 |
| Case 84 | 8 | 78,026,317  | 79,004,739  | 7 | 0 | 7 | 1 |
| Case 84 | 8 | 79,008,608  | 79,728,046  | 6 | 0 | 6 | 1 |
| Case 84 | 8 | 79,733,775  | 80,831,329  | 7 | 0 | 7 | 1 |
| Case 84 | 8 | 80,831,713  | 81,596,608  | 6 | 0 | 6 | 1 |
| Case 84 | 8 | 81,597,317  | 85,674,522  | 7 | 0 | 7 | 1 |
| Case 84 | 8 | 85,683,502  | 86,407,520  | 6 | 0 | 6 | 1 |
| Case 84 | 8 | 86,413,219  | 87,519,242  | 7 | 0 | 7 | 1 |
| Case 84 | 8 | 87,519,315  | 88,441,967  | 6 | 0 | 6 | 1 |
| Case 84 | 8 | 88,447,135  | 89,176,613  | 7 | 0 | 7 | 1 |
| Case 84 | 8 | 89,188,454  | 89,954,658  | 6 | 0 | 6 | 1 |
| Case 84 | 8 | 89,968,423  | 90,863,793  | 7 | 0 | 7 | 1 |
| Case 84 | 8 | 90,864,625  | 91,138,237  | 6 | 0 | 6 | 1 |
| Case 84 | 8 | 91,142,473  | 91,555,603  | 7 | 0 | 7 | 1 |
| Case 84 | 8 | 91,556,317  | 92,082,753  | 6 | 0 | 6 | 1 |
| Case 84 | 8 | 92,084,087  | 92,588,984  | 7 | 0 | 7 | 1 |
| Case 84 | 8 | 92,599,661  | 93,213,672  | 6 | 0 | 6 | 1 |
| Case 84 | 8 | 93,213,730  | 97,307,326  | 7 | 0 | 7 | 1 |
| Case 84 | 8 | 97,312,442  | 97,494,338  | 6 | 0 | 6 | 1 |
| Case 84 | 8 | 97,494,356  | 98,964,771  | 7 | 0 | 7 | 1 |
| Case 84 | 8 | 98,969,239  | 99,199,066  | 6 | 0 | 6 | 1 |
| Case 84 | 8 | 99,201,718  | 99,360,067  | 7 | 0 | 7 | 1 |
| Case 84 | 8 | 99,364,717  | 100,443,885 | 6 | 0 | 6 | 1 |
| Case 84 | 8 | 100,454,797 | 103,597,492 | 7 | 0 | 7 | 1 |
| Case 84 | 8 | 103,599,696 | 103,782,719 | 6 | 0 | 6 | 1 |
| Case 84 | 8 | 103,786,939 | 104,410,928 | 7 | 0 | 7 | 1 |
| Case 84 | 8 | 104,412,388 | 104,913,292 | 6 | 0 | 6 | 1 |
| Case 84 | 8 | 104,914,885 | 105,351,943 | 7 | 0 | 7 | 1 |
| Case 84 | 8 | 105,351,998 | 105,815,145 | 6 | 0 | 6 | 1 |
| Case 84 | 8 | 105,817,209 | 106,798,675 | 7 | 0 | 7 | 1 |
| Case 84 | 8 | 106,801,031 | 106,974,182 | 6 | 0 | 6 | 1 |
| Case 84 | 8 | 106,974,969 | 107,763,828 | 7 | 0 | 7 | 1 |
| Case 84 | 8 | 107,773,278 | 107,874,800 | 6 | 0 | 6 | 1 |
| Case 84 | 8 | 107,880,864 | 108,943,013 | 7 | 0 | 7 | 1 |
| Case 84 | 8 | 108,953,881 | 109,654,860 | 6 | 0 | 6 | 1 |
| Case 84 | 8 | 109,660,089 | 117,639,532 | 7 | 0 | 7 | 1 |
| Case 84 | 8 | 117,640,315 | 118,304,894 | 6 | 0 | 6 | 1 |
| Case 84 | 8 | 118,305,746 | 118,472,329 | 7 | 0 | 7 | 1 |



|         |   |             |             |   |   |   |   |
|---------|---|-------------|-------------|---|---|---|---|
| Case 84 | 8 | 118,476,814 | 119,273,537 | 6 | 0 | 6 | 1 |
| Case 84 | 8 | 119,275,733 | 120,541,955 | 7 | 0 | 7 | 1 |
| Case 84 | 8 | 120,544,948 | 121,327,673 | 6 | 0 | 6 | 1 |
| Case 84 | 8 | 121,328,214 | 123,450,875 | 7 | 0 | 7 | 1 |
| Case 84 | 8 | 123,451,096 | 124,142,502 | 6 | 0 | 6 | 1 |
| Case 84 | 8 | 124,145,469 | 126,447,308 | 7 | 0 | 7 | 1 |
| Case 84 | 8 | 126,448,393 | 126,984,970 | 6 | 0 | 6 | 1 |
| Case 84 | 8 | 126,995,907 | 127,292,996 | 7 | 0 | 7 | 1 |
| Case 84 | 8 | 127,293,085 | 127,681,578 | 6 | 0 | 6 | 1 |
| Case 84 | 8 | 127,683,850 | 131,654,560 | 7 | 0 | 7 | 1 |
| Case 84 | 8 | 131,654,755 | 132,230,063 | 6 | 0 | 6 | 1 |
| Case 84 | 8 | 132,238,169 | 132,862,920 | 7 | 0 | 7 | 1 |
| Case 84 | 8 | 132,869,766 | 134,264,054 | 5 | 0 | 5 | 1 |
| Case 84 | 8 | 134,265,495 | 134,517,560 | 6 | 0 | 6 | 1 |
| Case 84 | 8 | 134,518,133 | 137,720,395 | 5 | 0 | 5 | 1 |
| Case 84 | 8 | 137,720,952 | 138,877,271 | 6 | 0 | 6 | 1 |
| Case 84 | 8 | 138,881,439 | 138,902,764 | 7 | 0 | 7 | 1 |
| Case 84 | 8 | 138,905,296 | 141,716,284 | 5 | 0 | 5 | 1 |
| Case 84 | 8 | 141,733,009 | 143,757,037 | 6 | 0 | 6 | 1 |
| Case 84 | 8 | 143,761,931 | 143,927,918 | 5 | 0 | 5 | 1 |
| Case 84 | 8 | 143,928,233 | 144,664,594 | 6 | 0 | 6 | 1 |
| Case 84 | 8 | 144,668,405 | 144,671,848 | 7 | 0 | 7 | 1 |
| Case 84 | 8 | 144,671,905 | 144,943,196 | 5 | 0 | 5 | 1 |
| Case 84 | 8 | 144,943,223 | 144,990,840 | 7 | 0 | 7 | 1 |
| Case 84 | 8 | 144,990,878 | 146,293,414 | 5 | 0 | 5 | 1 |
| Case 84 | 9 | 46,587      | 17,792,845  | 2 | 0 | 2 | 1 |
| Case 84 | 9 | 17,793,435  | 18,074,369  | 3 | 0 | 3 | 1 |
| Case 84 | 9 | 18,075,710  | 18,804,418  | 2 | 0 | 2 | 1 |
| Case 84 | 9 | 18,805,813  | 18,927,818  | 3 | 0 | 3 | 1 |
| Case 84 | 9 | 18,928,039  | 32,614,523  | 2 | 0 | 2 | 1 |
| Case 84 | 9 | 32,618,055  | 32,707,775  | 3 | 0 | 3 | 1 |
| Case 84 | 9 | 32,717,013  | 33,367,587  | 2 | 0 | 2 | 1 |
| Case 84 | 9 | 33,369,924  | 33,465,928  | 3 | 0 | 3 | 1 |
| Case 84 | 9 | 33,466,088  | 35,514,653  | 2 | 0 | 2 | 1 |
| Case 84 | 9 | 35,518,997  | 35,766,561  | 4 | 0 | 4 | 1 |
| Case 84 | 9 | 35,778,800  | 36,744,752  | 2 | 0 | 2 | 1 |
| Case 84 | 9 | 36,745,892  | 37,081,301  | 3 | 0 | 3 | 1 |
| Case 84 | 9 | 37,092,433  | 37,939,673  | 2 | 0 | 2 | 1 |
| Case 84 | 9 | 37,942,152  | 38,140,772  | 3 | 0 | 3 | 1 |
| Case 84 | 9 | 38,141,369  | 43,504,854  | 2 | 0 | 2 | 1 |
| Case 84 | 9 | 43,581,253  | 46,944,322  | 3 | 0 | 3 | 1 |
| Case 84 | 9 | 65,629,772  | 71,071,933  | 3 | 0 | 3 | 1 |
| Case 84 | 9 | 71,082,682  | 71,131,098  | 2 | 0 | 2 | 1 |
| Case 84 | 9 | 71,137,232  | 71,396,426  | 4 | 0 | 4 | 1 |
| Case 84 | 9 | 71,397,734  | 73,150,918  | 2 | 0 | 2 | 1 |
| Case 84 | 9 | 73,150,984  | 73,416,062  | 3 | 0 | 3 | 1 |
| Case 84 | 9 | 73,416,273  | 75,139,296  | 2 | 0 | 2 | 1 |
| Case 84 | 9 | 75,144,147  | 75,354,330  | 3 | 0 | 3 | 1 |
| Case 84 | 9 | 75,355,093  | 80,041,641  | 2 | 0 | 2 | 1 |
| Case 84 | 9 | 80,041,884  | 80,086,534  | 3 | 0 | 3 | 1 |
| Case 84 | 9 | 80,087,031  | 85,752,837  | 2 | 0 | 2 | 1 |
| Case 84 | 9 | 85,756,459  | 85,944,604  | 3 | 0 | 3 | 1 |
| Case 84 | 9 | 85,944,803  | 90,143,575  | 2 | 0 | 2 | 1 |
| Case 84 | 9 | 90,145,334  | 90,246,317  | 3 | 0 | 3 | 1 |
| Case 84 | 9 | 90,250,053  | 94,414,784  | 2 | 0 | 2 | 1 |
| Case 84 | 9 | 94,417,069  | 94,919,766  | 3 | 0 | 3 | 1 |
| Case 84 | 9 | 94,920,495  | 96,320,239  | 2 | 0 | 2 | 1 |
| Case 84 | 9 | 96,326,127  | 96,490,009  | 3 | 0 | 3 | 1 |
| Case 84 | 9 | 96,493,773  | 97,409,437  | 2 | 0 | 2 | 1 |
| Case 84 | 9 | 97,409,771  | 97,535,381  | 4 | 0 | 4 | 1 |
| Case 84 | 9 | 97,535,396  | 99,521,119  | 2 | 0 | 2 | 1 |

|         |    |             |             |   |   |   |   |
|---------|----|-------------|-------------|---|---|---|---|
| Case 84 | 9  | 99,521,123  | 99,525,494  | 1 | 0 | 1 | 0 |
| Case 84 | 9  | 99,525,805  | 107,569,337 | 2 | 0 | 2 | 1 |
| Case 84 | 9  | 107,570,714 | 107,668,064 | 3 | 0 | 3 | 1 |
| Case 84 | 9  | 107,668,825 | 109,644,865 | 2 | 0 | 2 | 1 |
| Case 84 | 9  | 109,653,221 | 109,946,944 | 3 | 0 | 3 | 1 |
| Case 84 | 9  | 109,949,144 | 109,950,798 | 2 | 0 | 2 | 1 |
| Case 84 | 9  | 109,953,472 | 110,226,138 | 4 | 0 | 4 | 1 |
| Case 84 | 9  | 110,229,609 | 110,615,884 | 2 | 0 | 2 | 1 |
| Case 84 | 9  | 110,618,805 | 110,938,366 | 3 | 0 | 3 | 1 |
| Case 84 | 9  | 110,939,597 | 111,180,537 | 2 | 0 | 2 | 1 |
| Case 84 | 9  | 111,181,099 | 111,446,046 | 3 | 0 | 3 | 1 |
| Case 84 | 9  | 111,453,191 | 111,617,294 | 2 | 0 | 2 | 1 |
| Case 84 | 9  | 111,617,341 | 111,626,090 | 3 | 0 | 3 | 1 |
| Case 84 | 9  | 111,628,667 | 112,874,767 | 2 | 0 | 2 | 1 |
| Case 84 | 9  | 112,878,104 | 112,919,288 | 3 | 0 | 3 | 1 |
| Case 84 | 9  | 112,920,099 | 114,301,585 | 2 | 0 | 2 | 1 |
| Case 84 | 9  | 114,303,954 | 116,821,526 | 4 | 0 | 4 | 1 |
| Case 84 | 9  | 116,823,377 | 116,890,596 | 2 | 0 | 2 | 1 |
| Case 84 | 9  | 116,895,387 | 117,068,924 | 3 | 0 | 3 | 1 |
| Case 84 | 9  | 117,069,995 | 126,111,351 | 2 | 0 | 2 | 1 |
| Case 84 | 9  | 126,113,594 | 126,297,895 | 3 | 0 | 3 | 1 |
| Case 84 | 9  | 126,304,553 | 131,565,554 | 2 | 0 | 2 | 1 |
| Case 84 | 9  | 131,565,571 | 131,721,171 | 3 | 0 | 3 | 1 |
| Case 84 | 9  | 131,730,791 | 136,253,292 | 2 | 0 | 2 | 1 |
| Case 84 | 9  | 136,253,927 | 136,325,282 | 3 | 0 | 3 | 1 |
| Case 84 | 9  | 136,328,659 | 141,066,491 | 2 | 0 | 2 | 1 |
| Case 84 | 10 | 98,087      | 6,969,816   | 5 | 0 | 5 | 1 |
| Case 84 | 10 | 6,972,855   | 6,975,550   | 1 | 1 | 2 | 0 |
| Case 84 | 10 | 6,977,250   | 8,508,704   | 4 | 1 | 5 | 0 |
| Case 84 | 10 | 8,509,339   | 10,628,935  | 5 | 1 | 6 | 0 |
| Case 84 | 10 | 10,629,235  | 10,629,235  | 1 | 1 | 2 | 0 |
| Case 84 | 10 | 10,637,210  | 19,009,698  | 5 | 0 | 5 | 1 |
| Case 84 | 10 | 19,012,514  | 19,013,062  | 4 | 3 | 7 | 0 |
| Case 84 | 10 | 19,013,396  | 19,435,382  | 6 | 1 | 7 | 0 |
| Case 84 | 10 | 19,436,404  | 19,436,862  | 3 | 1 | 4 | 0 |
| Case 84 | 10 | 19,437,915  | 19,437,915  | 4 | 1 | 5 | 0 |
| Case 84 | 10 | 19,444,182  | 20,405,138  | 5 | 1 | 6 | 0 |
| Case 84 | 10 | 20,405,650  | 20,405,650  | 1 | 1 | 2 | 0 |
| Case 84 | 10 | 20,407,180  | 26,413,547  | 5 | 0 | 5 | 1 |
| Case 84 | 10 | 26,414,615  | 29,621,419  | 4 | 3 | 7 | 0 |
| Case 84 | 10 | 29,622,943  | 31,386,822  | 3 | 3 | 6 | 0 |
| Case 84 | 10 | 31,387,110  | 31,461,599  | 4 | 1 | 5 | 0 |
| Case 84 | 10 | 31,465,307  | 32,699,876  | 5 | 1 | 6 | 0 |
| Case 84 | 10 | 32,700,343  | 33,368,504  | 6 | 1 | 7 | 0 |
| Case 84 | 10 | 33,368,644  | 33,368,644  | 3 | 1 | 4 | 0 |
| Case 84 | 10 | 33,372,725  | 33,373,629  | 4 | 1 | 5 | 0 |
| Case 84 | 10 | 33,373,750  | 35,359,475  | 5 | 1 | 6 | 0 |
| Case 84 | 10 | 35,362,977  | 37,665,513  | 6 | 1 | 7 | 0 |
| Case 84 | 10 | 37,665,810  | 37,665,810  | 3 | 1 | 4 | 0 |
| Case 84 | 10 | 37,671,202  | 37,703,778  | 4 | 1 | 5 | 0 |
| Case 84 | 10 | 37,704,970  | 39,097,912  | 5 | 1 | 6 | 0 |
| Case 84 | 10 | 42,436,301  | 42,444,619  | 1 | 1 | 2 | 0 |
| Case 84 | 10 | 42,467,126  | 42,503,340  | 0 | 0 | 0 | 0 |
| Case 84 | 10 | 42,509,794  | 46,518,615  | 2 | 0 | 2 | 1 |
| Case 84 | 10 | 46,527,516  | 47,412,588  | 4 | 0 | 4 | 1 |
| Case 84 | 10 | 47,543,322  | 48,371,220  | 2 | 0 | 2 | 1 |
| Case 84 | 10 | 48,371,248  | 48,480,228  | 3 | 0 | 3 | 1 |
| Case 84 | 10 | 48,480,248  | 50,771,419  | 2 | 0 | 2 | 1 |
| Case 84 | 10 | 50,771,462  | 50,879,878  | 3 | 0 | 3 | 1 |
| Case 84 | 10 | 50,887,500  | 52,262,468  | 2 | 0 | 2 | 1 |
| Case 84 | 10 | 52,263,910  | 52,404,195  | 3 | 0 | 3 | 1 |

|         |    |             |             |   |   |   |   |
|---------|----|-------------|-------------|---|---|---|---|
| Case 84 | 10 | 52,414,456  | 60,588,644  | 2 | 0 | 2 | 1 |
| Case 84 | 10 | 60,590,203  | 62,279,124  | 3 | 0 | 3 | 1 |
| Case 84 | 10 | 62,281,234  | 62,564,556  | 2 | 0 | 2 | 1 |
| Case 84 | 10 | 62,565,043  | 63,167,404  | 3 | 0 | 3 | 1 |
| Case 84 | 10 | 63,168,488  | 63,493,724  | 2 | 0 | 2 | 1 |
| Case 84 | 10 | 63,495,205  | 63,769,839  | 3 | 0 | 3 | 1 |
| Case 84 | 10 | 63,772,869  | 64,260,847  | 2 | 0 | 2 | 1 |
| Case 84 | 10 | 64,261,198  | 64,761,091  | 3 | 0 | 3 | 1 |
| Case 84 | 10 | 64,762,369  | 71,313,908  | 2 | 0 | 2 | 1 |
| Case 84 | 10 | 71,320,358  | 72,298,676  | 3 | 0 | 3 | 1 |
| Case 84 | 10 | 72,298,713  | 73,380,179  | 2 | 0 | 2 | 1 |
| Case 84 | 10 | 73,380,904  | 73,501,374  | 3 | 0 | 3 | 1 |
| Case 84 | 10 | 73,501,556  | 75,138,691  | 2 | 0 | 2 | 1 |
| Case 84 | 10 | 75,139,789  | 75,687,849  | 3 | 0 | 3 | 1 |
| Case 84 | 10 | 75,692,923  | 76,481,311  | 2 | 0 | 2 | 1 |
| Case 84 | 10 | 76,498,150  | 79,662,213  | 3 | 0 | 3 | 1 |
| Case 84 | 10 | 79,694,278  | 79,925,262  | 2 | 0 | 2 | 1 |
| Case 84 | 10 | 79,929,802  | 80,459,780  | 3 | 0 | 3 | 1 |
| Case 84 | 10 | 80,462,465  | 80,810,343  | 2 | 0 | 2 | 1 |
| Case 84 | 10 | 80,812,749  | 81,863,964  | 3 | 0 | 3 | 1 |
| Case 84 | 10 | 81,872,073  | 83,515,878  | 2 | 0 | 2 | 1 |
| Case 84 | 10 | 83,522,580  | 83,709,299  | 3 | 0 | 3 | 1 |
| Case 84 | 10 | 83,709,652  | 85,672,695  | 2 | 0 | 2 | 1 |
| Case 84 | 10 | 85,675,348  | 86,098,324  | 3 | 0 | 3 | 1 |
| Case 84 | 10 | 86,122,255  | 86,281,044  | 2 | 0 | 2 | 1 |
| Case 84 | 10 | 86,281,577  | 88,211,703  | 3 | 0 | 3 | 1 |
| Case 84 | 10 | 88,213,414  | 88,364,717  | 2 | 0 | 2 | 1 |
| Case 84 | 10 | 88,372,958  | 88,449,377  | 3 | 0 | 3 | 1 |
| Case 84 | 10 | 88,450,058  | 88,813,947  | 2 | 0 | 2 | 1 |
| Case 84 | 10 | 88,828,168  | 89,534,244  | 3 | 0 | 3 | 1 |
| Case 84 | 10 | 89,566,989  | 89,647,154  | 0 | 0 | 0 | 0 |
| Case 84 | 10 | 89,649,838  | 90,757,787  | 3 | 0 | 3 | 1 |
| Case 84 | 10 | 90,759,724  | 91,636,235  | 2 | 0 | 2 | 1 |
| Case 84 | 10 | 91,637,151  | 91,977,937  | 3 | 0 | 3 | 1 |
| Case 84 | 10 | 91,980,454  | 92,345,067  | 2 | 0 | 2 | 1 |
| Case 84 | 10 | 92,346,694  | 92,937,921  | 3 | 0 | 3 | 1 |
| Case 84 | 10 | 92,938,019  | 93,250,996  | 2 | 0 | 2 | 1 |
| Case 84 | 10 | 93,258,896  | 93,389,343  | 3 | 0 | 3 | 1 |
| Case 84 | 10 | 93,389,826  | 93,778,652  | 2 | 0 | 2 | 1 |
| Case 84 | 10 | 93,781,926  | 94,356,912  | 3 | 0 | 3 | 1 |
| Case 84 | 10 | 94,363,993  | 95,030,453  | 2 | 0 | 2 | 1 |
| Case 84 | 10 | 95,032,483  | 95,097,599  | 3 | 0 | 3 | 1 |
| Case 84 | 10 | 95,098,144  | 95,309,488  | 2 | 0 | 2 | 1 |
| Case 84 | 10 | 95,310,539  | 95,402,973  | 3 | 0 | 3 | 1 |
| Case 84 | 10 | 95,405,754  | 95,556,992  | 2 | 0 | 2 | 1 |
| Case 84 | 10 | 95,559,398  | 96,061,793  | 3 | 0 | 3 | 1 |
| Case 84 | 10 | 96,064,281  | 96,825,153  | 2 | 0 | 2 | 1 |
| Case 84 | 10 | 96,826,827  | 97,632,808  | 3 | 0 | 3 | 1 |
| Case 84 | 10 | 97,633,021  | 97,968,148  | 2 | 0 | 2 | 1 |
| Case 84 | 10 | 97,969,694  | 98,274,045  | 3 | 0 | 3 | 1 |
| Case 84 | 10 | 98,279,053  | 98,380,277  | 2 | 0 | 2 | 1 |
| Case 84 | 10 | 98,380,285  | 98,430,592  | 3 | 0 | 3 | 1 |
| Case 84 | 10 | 98,433,420  | 98,908,733  | 2 | 0 | 2 | 1 |
| Case 84 | 10 | 98,909,311  | 99,219,993  | 3 | 0 | 3 | 1 |
| Case 84 | 10 | 99,220,454  | 99,429,307  | 2 | 0 | 2 | 1 |
| Case 84 | 10 | 99,433,297  | 99,868,267  | 3 | 0 | 3 | 1 |
| Case 84 | 10 | 99,872,003  | 100,022,548 | 2 | 0 | 2 | 1 |
| Case 84 | 10 | 100,022,679 | 100,292,627 | 3 | 0 | 3 | 1 |
| Case 84 | 10 | 100,293,700 | 101,209,006 | 2 | 0 | 2 | 1 |
| Case 84 | 10 | 101,213,253 | 101,362,751 | 3 | 0 | 3 | 1 |
| Case 84 | 10 | 101,365,313 | 101,591,737 | 2 | 0 | 2 | 1 |

|         |    |             |             |   |   |   |   |
|---------|----|-------------|-------------|---|---|---|---|
| Case 84 | 10 | 101,591,818 | 101,668,986 | 3 | 0 | 3 | 1 |
| Case 84 | 10 | 101,682,176 | 102,056,016 | 2 | 0 | 2 | 1 |
| Case 84 | 10 | 102,056,033 | 102,664,649 | 3 | 0 | 3 | 1 |
| Case 84 | 10 | 102,668,856 | 102,879,620 | 2 | 0 | 2 | 1 |
| Case 84 | 10 | 102,880,793 | 103,671,017 | 3 | 0 | 3 | 1 |
| Case 84 | 10 | 103,672,335 | 104,348,241 | 2 | 0 | 2 | 1 |
| Case 84 | 10 | 104,356,979 | 104,855,656 | 3 | 0 | 3 | 1 |
| Case 84 | 10 | 104,857,218 | 105,220,753 | 2 | 0 | 2 | 1 |
| Case 84 | 10 | 105,225,201 | 105,819,937 | 3 | 0 | 3 | 1 |
| Case 84 | 10 | 105,819,956 | 106,026,843 | 2 | 0 | 2 | 1 |
| Case 84 | 10 | 106,027,059 | 106,842,041 | 3 | 0 | 3 | 1 |
| Case 84 | 10 | 106,845,381 | 107,452,683 | 2 | 0 | 2 | 1 |
| Case 84 | 10 | 107,455,498 | 108,262,923 | 3 | 0 | 3 | 1 |
| Case 84 | 10 | 108,267,721 | 108,725,864 | 2 | 0 | 2 | 1 |
| Case 84 | 10 | 108,726,430 | 109,078,392 | 3 | 0 | 3 | 1 |
| Case 84 | 10 | 109,081,424 | 111,264,591 | 2 | 0 | 2 | 1 |
| Case 84 | 10 | 111,268,887 | 112,314,007 | 3 | 0 | 3 | 1 |
| Case 84 | 10 | 112,314,670 | 112,423,491 | 2 | 0 | 2 | 1 |
| Case 84 | 10 | 112,425,178 | 114,353,465 | 3 | 0 | 3 | 1 |
| Case 84 | 10 | 114,358,555 | 114,554,779 | 2 | 0 | 2 | 1 |
| Case 84 | 10 | 114,557,647 | 115,589,161 | 3 | 0 | 3 | 1 |
| Case 84 | 10 | 115,590,412 | 115,679,508 | 2 | 0 | 2 | 1 |
| Case 84 | 10 | 115,679,965 | 115,848,372 | 3 | 0 | 3 | 1 |
| Case 84 | 10 | 115,850,176 | 115,993,813 | 2 | 0 | 2 | 1 |
| Case 84 | 10 | 116,000,453 | 116,582,560 | 3 | 0 | 3 | 1 |
| Case 84 | 10 | 116,588,737 | 117,707,733 | 2 | 0 | 2 | 1 |
| Case 84 | 10 | 117,708,868 | 118,506,755 | 3 | 0 | 3 | 1 |
| Case 84 | 10 | 118,507,976 | 118,893,231 | 2 | 0 | 2 | 1 |
| Case 84 | 10 | 118,895,368 | 120,784,977 | 3 | 0 | 3 | 1 |
| Case 84 | 10 | 120,792,703 | 121,054,142 | 2 | 0 | 2 | 1 |
| Case 84 | 10 | 121,054,378 | 121,510,669 | 3 | 0 | 3 | 1 |
| Case 84 | 10 | 121,513,063 | 121,692,606 | 2 | 0 | 2 | 1 |
| Case 84 | 10 | 121,692,908 | 122,395,310 | 3 | 0 | 3 | 1 |
| Case 84 | 10 | 122,396,106 | 122,537,487 | 2 | 0 | 2 | 1 |
| Case 84 | 10 | 122,538,919 | 123,570,191 | 3 | 0 | 3 | 1 |
| Case 84 | 10 | 123,576,479 | 123,747,807 | 2 | 0 | 2 | 1 |
| Case 84 | 10 | 123,749,116 | 124,123,470 | 3 | 0 | 3 | 1 |
| Case 84 | 10 | 124,124,306 | 124,132,188 | 2 | 0 | 2 | 1 |
| Case 84 | 10 | 124,140,430 | 124,524,241 | 4 | 0 | 4 | 1 |
| Case 84 | 10 | 124,528,930 | 124,966,517 | 2 | 0 | 2 | 1 |
| Case 84 | 10 | 124,967,722 | 125,497,240 | 3 | 0 | 3 | 1 |
| Case 84 | 10 | 125,498,896 | 126,138,473 | 2 | 0 | 2 | 1 |
| Case 84 | 10 | 126,144,231 | 126,383,857 | 3 | 0 | 3 | 1 |
| Case 84 | 10 | 126,393,823 | 126,715,466 | 2 | 0 | 2 | 1 |
| Case 84 | 10 | 126,715,519 | 127,512,283 | 3 | 0 | 3 | 1 |
| Case 84 | 10 | 127,515,197 | 127,698,027 | 2 | 0 | 2 | 1 |
| Case 84 | 10 | 127,698,643 | 129,907,610 | 3 | 0 | 3 | 1 |
| Case 84 | 10 | 129,907,631 | 130,206,013 | 2 | 0 | 2 | 1 |
| Case 84 | 10 | 130,210,370 | 131,830,640 | 3 | 0 | 3 | 1 |
| Case 84 | 10 | 131,830,899 | 132,190,059 | 2 | 0 | 2 | 1 |
| Case 84 | 10 | 132,191,520 | 132,328,300 | 3 | 0 | 3 | 1 |
| Case 84 | 10 | 132,328,529 | 132,992,902 | 2 | 0 | 2 | 1 |
| Case 84 | 10 | 132,993,796 | 133,743,166 | 3 | 0 | 3 | 1 |
| Case 84 | 10 | 133,745,628 | 133,859,537 | 2 | 0 | 2 | 1 |
| Case 84 | 10 | 133,862,007 | 134,069,610 | 3 | 0 | 3 | 1 |
| Case 84 | 10 | 134,069,930 | 135,477,883 | 2 | 0 | 2 | 1 |
| Case 84 | 11 | 193,146     | 3,742,758   | 2 | 1 | 3 | 0 |
| Case 84 | 11 | 3,743,046   | 3,778,432   | 1 | 1 | 2 | 0 |
| Case 84 | 11 | 3,784,133   | 4,389,363   | 2 | 1 | 3 | 0 |
| Case 84 | 11 | 4,389,639   | 4,674,016   | 2 | 2 | 4 | 0 |
| Case 84 | 11 | 4,674,129   | 4,947,444   | 2 | 1 | 3 | 0 |

|         |    |             |             |   |   |   |   |
|---------|----|-------------|-------------|---|---|---|---|
| Case 84 | 11 | 4,948,560   | 4,948,560   | 1 | 1 | 2 | 0 |
| Case 84 | 11 | 4,951,599   | 5,000,043   | 0 | 0 | 0 | 0 |
| Case 84 | 11 | 5,005,327   | 5,008,118   | 2 | 0 | 2 | 1 |
| Case 84 | 11 | 5,009,563   | 5,246,908   | 2 | 1 | 3 | 0 |
| Case 84 | 11 | 5,247,062   | 5,344,561   | 2 | 2 | 4 | 0 |
| Case 84 | 11 | 5,344,592   | 5,420,909   | 2 | 1 | 3 | 0 |
| Case 84 | 11 | 5,422,198   | 5,624,495   | 2 | 2 | 4 | 0 |
| Case 84 | 11 | 5,624,792   | 7,188,457   | 2 | 1 | 3 | 0 |
| Case 84 | 11 | 7,189,003   | 7,616,191   | 2 | 2 | 4 | 0 |
| Case 84 | 11 | 7,617,899   | 10,368,976  | 2 | 1 | 3 | 0 |
| Case 84 | 11 | 10,370,420  | 10,788,376  | 2 | 2 | 4 | 0 |
| Case 84 | 11 | 10,791,787  | 11,387,855  | 2 | 1 | 3 | 0 |
| Case 84 | 11 | 11,388,125  | 11,448,210  | 2 | 2 | 4 | 0 |
| Case 84 | 11 | 11,450,673  | 12,055,477  | 2 | 1 | 3 | 0 |
| Case 84 | 11 | 12,064,576  | 12,183,822  | 2 | 2 | 4 | 0 |
| Case 84 | 11 | 12,183,823  | 12,279,937  | 2 | 1 | 3 | 0 |
| Case 84 | 11 | 12,281,376  | 13,185,226  | 2 | 2 | 4 | 0 |
| Case 84 | 11 | 13,187,977  | 14,113,759  | 2 | 1 | 3 | 0 |
| Case 84 | 11 | 14,114,044  | 14,355,732  | 2 | 2 | 4 | 0 |
| Case 84 | 11 | 14,360,435  | 20,930,997  | 2 | 1 | 3 | 0 |
| Case 84 | 11 | 20,931,291  | 21,581,005  | 2 | 0 | 2 | 1 |
| Case 84 | 11 | 21,581,665  | 38,860,022  | 2 | 1 | 3 | 0 |
| Case 84 | 11 | 38,876,802  | 39,011,825  | 2 | 0 | 2 | 1 |
| Case 84 | 11 | 39,031,434  | 43,788,330  | 2 | 1 | 3 | 0 |
| Case 84 | 11 | 43,791,865  | 43,957,859  | 2 | 2 | 4 | 0 |
| Case 84 | 11 | 43,960,386  | 50,296,502  | 2 | 1 | 3 | 0 |
| Case 84 | 11 | 50,325,741  | 51,518,519  | 2 | 0 | 2 | 1 |
| Case 84 | 11 | 51,521,929  | 51,591,253  | 3 | 0 | 3 | 1 |
| Case 84 | 11 | 54,794,237  | 55,026,160  | 0 | 0 | 0 | 0 |
| Case 84 | 11 | 55,027,673  | 56,344,267  | 2 | 0 | 2 | 1 |
| Case 84 | 11 | 56,344,713  | 56,488,546  | 3 | 0 | 3 | 1 |
| Case 84 | 11 | 56,489,004  | 59,166,402  | 2 | 0 | 2 | 1 |
| Case 84 | 11 | 59,169,295  | 59,225,232  | 3 | 0 | 3 | 1 |
| Case 84 | 11 | 59,225,262  | 69,224,506  | 2 | 0 | 2 | 1 |
| Case 84 | 11 | 69,228,367  | 69,395,013  | 4 | 0 | 4 | 1 |
| Case 84 | 11 | 69,395,443  | 71,864,717  | 2 | 0 | 2 | 1 |
| Case 84 | 11 | 71,872,777  | 72,118,442  | 2 | 2 | 4 | 0 |
| Case 84 | 11 | 72,138,578  | 76,801,982  | 2 | 1 | 3 | 0 |
| Case 84 | 11 | 76,804,131  | 76,813,931  | 4 | 1 | 5 | 0 |
| Case 84 | 11 | 76,813,968  | 76,982,342  | 3 | 1 | 4 | 0 |
| Case 84 | 11 | 76,992,664  | 117,909,101 | 2 | 1 | 3 | 0 |
| Case 84 | 11 | 117,909,799 | 117,911,367 | 2 | 2 | 4 | 0 |
| Case 84 | 11 | 117,912,465 | 118,279,936 | 3 | 1 | 4 | 0 |
| Case 84 | 11 | 118,285,995 | 134,934,063 | 2 | 1 | 3 | 0 |
| Case 84 | 12 | 191,619     | 9,395,789   | 2 | 1 | 3 | 0 |
| Case 84 | 12 | 9,395,807   | 9,668,380   | 2 | 2 | 4 | 0 |
| Case 84 | 12 | 9,737,858   | 11,174,644  | 2 | 1 | 3 | 0 |
| Case 84 | 12 | 11,174,672  | 11,252,845  | 1 | 1 | 2 | 0 |
| Case 84 | 12 | 11,258,011  | 11,598,347  | 2 | 1 | 3 | 0 |
| Case 84 | 12 | 11,600,320  | 12,228,887  | 2 | 2 | 4 | 0 |
| Case 84 | 12 | 12,232,283  | 13,402,175  | 2 | 1 | 3 | 0 |
| Case 84 | 12 | 13,403,253  | 13,604,120  | 2 | 2 | 4 | 0 |
| Case 84 | 12 | 13,605,240  | 13,929,640  | 2 | 1 | 3 | 0 |
| Case 84 | 12 | 13,930,857  | 14,167,216  | 2 | 2 | 4 | 0 |
| Case 84 | 12 | 14,170,627  | 15,240,327  | 2 | 1 | 3 | 0 |
| Case 84 | 12 | 15,241,484  | 15,773,421  | 2 | 2 | 4 | 0 |
| Case 84 | 12 | 15,774,202  | 16,171,293  | 2 | 1 | 3 | 0 |
| Case 84 | 12 | 16,181,423  | 16,338,596  | 2 | 2 | 4 | 0 |
| Case 84 | 12 | 16,340,300  | 16,562,400  | 2 | 1 | 3 | 0 |
| Case 84 | 12 | 16,562,428  | 16,692,603  | 2 | 2 | 4 | 0 |
| Case 84 | 12 | 16,694,800  | 19,807,502  | 2 | 1 | 3 | 0 |

|         |    |             |             |   |   |   |   |
|---------|----|-------------|-------------|---|---|---|---|
| Case 84 | 12 | 19,812,468  | 20,855,761  | 2 | 2 | 4 | 0 |
| Case 84 | 12 | 20,857,467  | 21,526,367  | 2 | 1 | 3 | 0 |
| Case 84 | 12 | 21,526,651  | 23,550,425  | 2 | 2 | 4 | 0 |
| Case 84 | 12 | 23,552,823  | 25,375,799  | 2 | 1 | 3 | 0 |
| Case 84 | 12 | 25,391,456  | 28,311,347  | 2 | 2 | 4 | 0 |
| Case 84 | 12 | 28,312,593  | 29,036,447  | 2 | 1 | 3 | 0 |
| Case 84 | 12 | 29,042,392  | 29,080,104  | 4 | 0 | 4 | 1 |
| Case 84 | 12 | 29,080,889  | 29,468,987  | 3 | 2 | 5 | 0 |
| Case 84 | 12 | 29,469,774  | 29,596,324  | 4 | 0 | 4 | 1 |
| Case 84 | 12 | 29,596,365  | 32,094,101  | 2 | 2 | 4 | 0 |
| Case 84 | 12 | 32,097,486  | 32,138,725  | 2 | 1 | 3 | 0 |
| Case 84 | 12 | 32,138,843  | 33,765,194  | 2 | 2 | 4 | 0 |
| Case 84 | 12 | 33,769,090  | 34,819,926  | 2 | 1 | 3 | 0 |
| Case 84 | 12 | 34,826,574  | 34,853,011  | 1 | 1 | 2 | 0 |
| Case 84 | 12 | 37,876,400  | 38,347,638  | 1 | 1 | 2 | 0 |
| Case 84 | 12 | 38,359,611  | 39,450,491  | 2 | 1 | 3 | 0 |
| Case 84 | 12 | 39,455,489  | 39,647,079  | 2 | 2 | 4 | 0 |
| Case 84 | 12 | 39,651,893  | 40,715,302  | 2 | 1 | 3 | 0 |
| Case 84 | 12 | 40,715,590  | 40,821,867  | 2 | 2 | 4 | 0 |
| Case 84 | 12 | 40,821,871  | 41,133,114  | 2 | 1 | 3 | 0 |
| Case 84 | 12 | 41,134,450  | 42,304,125  | 2 | 2 | 4 | 0 |
| Case 84 | 12 | 42,307,611  | 58,574,139  | 2 | 1 | 3 | 0 |
| Case 84 | 12 | 58,575,527  | 58,846,726  | 2 | 2 | 4 | 0 |
| Case 84 | 12 | 58,854,426  | 62,994,433  | 2 | 1 | 3 | 0 |
| Case 84 | 12 | 62,995,984  | 63,195,787  | 2 | 2 | 4 | 0 |
| Case 84 | 12 | 63,195,840  | 68,169,616  | 2 | 1 | 3 | 0 |
| Case 84 | 12 | 68,176,381  | 68,414,744  | 2 | 2 | 4 | 0 |
| Case 84 | 12 | 68,416,645  | 70,268,693  | 2 | 1 | 3 | 0 |
| Case 84 | 12 | 70,269,566  | 70,397,165  | 2 | 2 | 4 | 0 |
| Case 84 | 12 | 70,397,972  | 71,173,316  | 2 | 1 | 3 | 0 |
| Case 84 | 12 | 71,177,098  | 71,634,794  | 2 | 2 | 4 | 0 |
| Case 84 | 12 | 71,649,818  | 72,343,287  | 2 | 1 | 3 | 0 |
| Case 84 | 12 | 72,344,618  | 72,667,550  | 2 | 2 | 4 | 0 |
| Case 84 | 12 | 72,667,687  | 89,425,822  | 2 | 1 | 3 | 0 |
| Case 84 | 12 | 89,435,177  | 89,640,358  | 2 | 2 | 4 | 0 |
| Case 84 | 12 | 89,642,084  | 90,609,017  | 2 | 1 | 3 | 0 |
| Case 84 | 12 | 90,633,507  | 92,186,339  | 2 | 2 | 4 | 0 |
| Case 84 | 12 | 92,191,466  | 93,452,318  | 2 | 1 | 3 | 0 |
| Case 84 | 12 | 93,454,823  | 94,020,567  | 2 | 2 | 4 | 0 |
| Case 84 | 12 | 94,022,971  | 100,626,305 | 2 | 1 | 3 | 0 |
| Case 84 | 12 | 100,631,797 | 100,987,741 | 2 | 2 | 4 | 0 |
| Case 84 | 12 | 100,993,553 | 103,896,595 | 2 | 1 | 3 | 0 |
| Case 84 | 12 | 103,898,134 | 103,988,267 | 2 | 2 | 4 | 0 |
| Case 84 | 12 | 103,988,268 | 104,144,426 | 2 | 1 | 3 | 0 |
| Case 84 | 12 | 104,144,835 | 104,186,946 | 2 | 2 | 4 | 0 |
| Case 84 | 12 | 104,187,260 | 105,746,767 | 2 | 1 | 3 | 0 |
| Case 84 | 12 | 105,751,954 | 106,247,887 | 2 | 2 | 4 | 0 |
| Case 84 | 12 | 106,248,532 | 116,072,234 | 2 | 1 | 3 | 0 |
| Case 84 | 12 | 116,074,762 | 116,182,525 | 2 | 2 | 4 | 0 |
| Case 84 | 12 | 116,183,484 | 132,339,957 | 2 | 1 | 3 | 0 |
| Case 84 | 12 | 132,343,891 | 132,511,987 | 1 | 1 | 2 | 0 |
| Case 84 | 12 | 132,512,663 | 133,449,367 | 2 | 1 | 3 | 0 |
| Case 84 | 12 | 133,464,500 | 133,810,935 | 1 | 1 | 2 | 0 |
| Case 84 | 13 | 19,058,717  | 24,384,047  | 3 | 0 | 3 | 1 |
| Case 84 | 13 | 24,387,412  | 24,387,412  | 2 | 0 | 2 | 1 |
| Case 84 | 13 | 24,387,570  | 24,808,217  | 4 | 0 | 4 | 1 |
| Case 84 | 13 | 24,808,505  | 28,397,996  | 3 | 0 | 3 | 1 |
| Case 84 | 13 | 28,398,994  | 28,500,496  | 4 | 0 | 4 | 1 |
| Case 84 | 13 | 28,514,849  | 32,891,798  | 3 | 0 | 3 | 1 |
| Case 84 | 13 | 32,893,271  | 32,968,861  | 2 | 0 | 2 | 1 |
| Case 84 | 13 | 32,968,922  | 35,488,617  | 3 | 0 | 3 | 1 |

|         |    |             |             |   |   |   |   |
|---------|----|-------------|-------------|---|---|---|---|
| Case 84 | 13 | 35,489,094  | 36,009,566  | 2 | 0 | 2 | 1 |
| Case 84 | 13 | 36,011,882  | 106,304,224 | 3 | 0 | 3 | 1 |
| Case 84 | 13 | 106,305,635 | 106,318,499 | 2 | 0 | 2 | 1 |
| Case 84 | 13 | 106,325,458 | 106,684,468 | 4 | 0 | 4 | 1 |
| Case 84 | 13 | 106,685,573 | 113,536,257 | 3 | 0 | 3 | 1 |
| Case 84 | 13 | 113,536,260 | 113,536,260 | 2 | 0 | 2 | 1 |
| Case 84 | 13 | 113,536,627 | 113,715,020 | 4 | 0 | 4 | 1 |
| Case 84 | 13 | 113,717,098 | 115,103,529 | 3 | 0 | 3 | 1 |
| Case 84 | 14 | 19,280,733  | 20,416,499  | 4 | 1 | 5 | 0 |
| Case 84 | 14 | 20,420,338  | 20,618,025  | 2 | 1 | 3 | 0 |
| Case 84 | 14 | 20,622,221  | 20,940,468  | 2 | 2 | 4 | 0 |
| Case 84 | 14 | 20,940,515  | 21,052,305  | 2 | 1 | 3 | 0 |
| Case 84 | 14 | 21,052,362  | 21,108,896  | 2 | 2 | 4 | 0 |
| Case 84 | 14 | 21,108,909  | 21,247,801  | 2 | 1 | 3 | 0 |
| Case 84 | 14 | 21,249,869  | 21,413,602  | 2 | 2 | 4 | 0 |
| Case 84 | 14 | 21,421,088  | 21,967,133  | 2 | 1 | 3 | 0 |
| Case 84 | 14 | 21,967,916  | 23,231,146  | 2 | 2 | 4 | 0 |
| Case 84 | 14 | 23,233,971  | 25,126,821  | 2 | 1 | 3 | 0 |
| Case 84 | 14 | 25,130,692  | 26,057,113  | 2 | 2 | 4 | 0 |
| Case 84 | 14 | 26,057,215  | 26,631,035  | 2 | 1 | 3 | 0 |
| Case 84 | 14 | 26,631,830  | 27,039,039  | 2 | 2 | 4 | 0 |
| Case 84 | 14 | 27,047,037  | 31,989,217  | 2 | 1 | 3 | 0 |
| Case 84 | 14 | 31,989,902  | 32,422,346  | 2 | 2 | 4 | 0 |
| Case 84 | 14 | 32,423,630  | 32,764,761  | 2 | 1 | 3 | 0 |
| Case 84 | 14 | 32,765,219  | 32,962,300  | 2 | 2 | 4 | 0 |
| Case 84 | 14 | 32,964,338  | 33,305,020  | 2 | 1 | 3 | 0 |
| Case 84 | 14 | 33,310,288  | 35,158,184  | 2 | 2 | 4 | 0 |
| Case 84 | 14 | 35,160,860  | 35,649,943  | 2 | 1 | 3 | 0 |
| Case 84 | 14 | 35,661,048  | 35,661,048  | 4 | 0 | 4 | 1 |
| Case 84 | 14 | 35,661,293  | 37,587,697  | 3 | 2 | 5 | 0 |
| Case 84 | 14 | 37,592,381  | 38,048,891  | 2 | 1 | 3 | 0 |
| Case 84 | 14 | 38,051,035  | 39,163,368  | 2 | 2 | 4 | 0 |
| Case 84 | 14 | 39,169,477  | 47,620,548  | 2 | 1 | 3 | 0 |
| Case 84 | 14 | 47,624,206  | 48,170,885  | 2 | 2 | 4 | 0 |
| Case 84 | 14 | 48,178,355  | 49,092,169  | 2 | 1 | 3 | 0 |
| Case 84 | 14 | 49,094,915  | 49,951,350  | 2 | 2 | 4 | 0 |
| Case 84 | 14 | 49,952,834  | 50,754,969  | 2 | 1 | 3 | 0 |
| Case 84 | 14 | 50,760,030  | 51,573,517  | 2 | 2 | 4 | 0 |
| Case 84 | 14 | 51,574,856  | 54,312,047  | 2 | 1 | 3 | 0 |
| Case 84 | 14 | 54,313,655  | 55,407,944  | 2 | 2 | 4 | 0 |
| Case 84 | 14 | 55,407,992  | 56,166,871  | 2 | 1 | 3 | 0 |
| Case 84 | 14 | 56,173,687  | 56,959,440  | 2 | 2 | 4 | 0 |
| Case 84 | 14 | 56,959,881  | 57,114,085  | 2 | 1 | 3 | 0 |
| Case 84 | 14 | 57,114,385  | 57,665,761  | 2 | 2 | 4 | 0 |
| Case 84 | 14 | 57,668,859  | 58,056,257  | 2 | 1 | 3 | 0 |
| Case 84 | 14 | 58,060,707  | 58,596,356  | 2 | 2 | 4 | 0 |
| Case 84 | 14 | 58,598,373  | 59,142,548  | 2 | 1 | 3 | 0 |
| Case 84 | 14 | 59,144,955  | 59,504,389  | 2 | 2 | 4 | 0 |
| Case 84 | 14 | 59,505,553  | 60,921,836  | 2 | 1 | 3 | 0 |
| Case 84 | 14 | 60,923,658  | 61,180,312  | 2 | 2 | 4 | 0 |
| Case 84 | 14 | 61,180,321  | 61,675,709  | 2 | 1 | 3 | 0 |
| Case 84 | 14 | 61,682,713  | 62,010,237  | 2 | 2 | 4 | 0 |
| Case 84 | 14 | 62,010,359  | 62,678,303  | 2 | 1 | 3 | 0 |
| Case 84 | 14 | 62,679,790  | 63,784,452  | 2 | 2 | 4 | 0 |
| Case 84 | 14 | 63,786,357  | 66,136,163  | 2 | 1 | 3 | 0 |
| Case 84 | 14 | 66,142,960  | 68,055,884  | 2 | 2 | 4 | 0 |
| Case 84 | 14 | 68,056,390  | 68,611,136  | 2 | 1 | 3 | 0 |
| Case 84 | 14 | 68,621,818  | 69,452,088  | 2 | 2 | 4 | 0 |
| Case 84 | 14 | 69,455,505  | 69,992,346  | 2 | 1 | 3 | 0 |
| Case 84 | 14 | 69,992,838  | 70,512,159  | 2 | 2 | 4 | 0 |
| Case 84 | 14 | 70,512,889  | 70,735,534  | 2 | 1 | 3 | 0 |

|         |    |             |             |   |   |   |   |
|---------|----|-------------|-------------|---|---|---|---|
| Case 84 | 14 | 70,738,521  | 71,712,150  | 2 | 2 | 4 | 0 |
| Case 84 | 14 | 71,712,343  | 72,190,399  | 2 | 1 | 3 | 0 |
| Case 84 | 14 | 72,191,310  | 72,645,729  | 2 | 2 | 4 | 0 |
| Case 84 | 14 | 72,647,846  | 72,757,384  | 2 | 1 | 3 | 0 |
| Case 84 | 14 | 72,759,412  | 73,258,444  | 2 | 2 | 4 | 0 |
| Case 84 | 14 | 73,260,377  | 75,558,231  | 2 | 1 | 3 | 0 |
| Case 84 | 14 | 75,562,076  | 76,045,766  | 2 | 2 | 4 | 0 |
| Case 84 | 14 | 76,045,858  | 78,060,031  | 2 | 1 | 3 | 0 |
| Case 84 | 14 | 78,063,440  | 81,141,399  | 2 | 2 | 4 | 0 |
| Case 84 | 14 | 81,144,044  | 81,371,188  | 2 | 1 | 3 | 0 |
| Case 84 | 14 | 81,371,207  | 84,535,427  | 2 | 2 | 4 | 0 |
| Case 84 | 14 | 84,547,783  | 85,565,927  | 2 | 1 | 3 | 0 |
| Case 84 | 14 | 85,565,987  | 89,656,772  | 2 | 2 | 4 | 0 |
| Case 84 | 14 | 89,657,867  | 90,145,556  | 2 | 1 | 3 | 0 |
| Case 84 | 14 | 90,149,049  | 90,208,263  | 2 | 2 | 4 | 0 |
| Case 84 | 14 | 90,209,466  | 91,491,113  | 3 | 1 | 4 | 0 |
| Case 84 | 14 | 91,497,719  | 91,770,261  | 4 | 1 | 5 | 0 |
| Case 84 | 14 | 91,772,204  | 93,313,542  | 2 | 1 | 3 | 0 |
| Case 84 | 14 | 93,314,692  | 93,649,793  | 2 | 2 | 4 | 0 |
| Case 84 | 14 | 93,649,990  | 94,200,936  | 2 | 1 | 3 | 0 |
| Case 84 | 14 | 94,201,670  | 94,517,670  | 2 | 2 | 4 | 0 |
| Case 84 | 14 | 94,517,778  | 95,090,410  | 2 | 1 | 3 | 0 |
| Case 84 | 14 | 95,094,023  | 95,353,739  | 2 | 2 | 4 | 0 |
| Case 84 | 14 | 95,358,513  | 96,038,182  | 2 | 1 | 3 | 0 |
| Case 84 | 14 | 96,038,299  | 96,165,754  | 2 | 2 | 4 | 0 |
| Case 84 | 14 | 96,169,131  | 97,365,090  | 2 | 1 | 3 | 0 |
| Case 84 | 14 | 97,371,939  | 97,994,090  | 2 | 2 | 4 | 0 |
| Case 84 | 14 | 98,000,813  | 98,263,147  | 2 | 1 | 3 | 0 |
| Case 84 | 14 | 98,263,979  | 98,483,831  | 2 | 2 | 4 | 0 |
| Case 84 | 14 | 98,486,406  | 98,731,550  | 2 | 1 | 3 | 0 |
| Case 84 | 14 | 98,734,567  | 99,654,436  | 2 | 2 | 4 | 0 |
| Case 84 | 14 | 99,657,192  | 99,677,128  | 2 | 0 | 2 | 1 |
| Case 84 | 14 | 99,679,507  | 101,643,065 | 2 | 1 | 3 | 0 |
| Case 84 | 14 | 101,643,081 | 102,404,741 | 2 | 2 | 4 | 0 |
| Case 84 | 14 | 102,410,245 | 102,600,112 | 2 | 1 | 3 | 0 |
| Case 84 | 14 | 102,605,127 | 102,659,694 | 2 | 2 | 4 | 0 |
| Case 84 | 14 | 102,660,012 | 103,376,031 | 3 | 1 | 4 | 0 |
| Case 84 | 14 | 103,377,321 | 103,602,278 | 2 | 1 | 3 | 0 |
| Case 84 | 14 | 103,602,657 | 103,705,842 | 2 | 2 | 4 | 0 |
| Case 84 | 14 | 103,707,417 | 103,829,328 | 4 | 1 | 5 | 0 |
| Case 84 | 14 | 103,836,385 | 103,918,029 | 5 | 1 | 6 | 0 |
| Case 84 | 14 | 103,933,469 | 107,287,663 | 2 | 1 | 3 | 0 |
| Case 84 | 15 | 20,034,919  | 31,528,162  | 2 | 0 | 2 | 1 |
| Case 84 | 15 | 31,528,656  | 32,185,610  | 3 | 0 | 3 | 1 |
| Case 84 | 15 | 32,187,120  | 34,017,054  | 2 | 0 | 2 | 1 |
| Case 84 | 15 | 34,017,718  | 34,057,407  | 3 | 0 | 3 | 1 |
| Case 84 | 15 | 34,060,601  | 34,373,344  | 2 | 0 | 2 | 1 |
| Case 84 | 15 | 34,375,818  | 35,117,336  | 3 | 0 | 3 | 1 |
| Case 84 | 15 | 35,119,748  | 35,275,615  | 2 | 0 | 2 | 1 |
| Case 84 | 15 | 35,278,475  | 35,740,582  | 3 | 0 | 3 | 1 |
| Case 84 | 15 | 35,741,648  | 36,719,135  | 2 | 0 | 2 | 1 |
| Case 84 | 15 | 36,720,037  | 37,191,961  | 3 | 0 | 3 | 1 |
| Case 84 | 15 | 37,193,851  | 38,838,264  | 2 | 0 | 2 | 1 |
| Case 84 | 15 | 38,839,587  | 39,246,333  | 3 | 0 | 3 | 1 |
| Case 84 | 15 | 39,248,406  | 39,542,522  | 2 | 0 | 2 | 1 |
| Case 84 | 15 | 39,542,919  | 39,886,304  | 3 | 0 | 3 | 1 |
| Case 84 | 15 | 39,886,330  | 41,148,498  | 2 | 0 | 2 | 1 |
| Case 84 | 15 | 41,148,516  | 41,220,900  | 3 | 0 | 3 | 1 |
| Case 84 | 15 | 41,222,183  | 42,979,547  | 2 | 0 | 2 | 1 |
| Case 84 | 15 | 42,979,861  | 43,020,434  | 3 | 0 | 3 | 1 |
| Case 84 | 15 | 43,020,878  | 43,495,212  | 2 | 0 | 2 | 1 |



|         |    |            |            |   |   |   |   |
|---------|----|------------|------------|---|---|---|---|
| Case 84 | 15 | 43,495,420 | 43,619,560 | 3 | 0 | 3 | 1 |
| Case 84 | 15 | 43,620,073 | 45,396,374 | 2 | 0 | 2 | 1 |
| Case 84 | 15 | 45,396,563 | 45,544,319 | 3 | 0 | 3 | 1 |
| Case 84 | 15 | 45,544,906 | 48,734,008 | 2 | 0 | 2 | 1 |
| Case 84 | 15 | 48,739,274 | 49,012,013 | 3 | 0 | 3 | 1 |
| Case 84 | 15 | 49,013,011 | 49,127,134 | 2 | 0 | 2 | 1 |
| Case 84 | 15 | 49,129,323 | 49,279,406 | 3 | 0 | 3 | 1 |
| Case 84 | 15 | 49,281,624 | 51,542,757 | 2 | 0 | 2 | 1 |
| Case 84 | 15 | 51,543,382 | 51,748,610 | 3 | 0 | 3 | 1 |
| Case 84 | 15 | 51,750,931 | 53,320,058 | 2 | 0 | 2 | 1 |
| Case 84 | 15 | 53,332,308 | 53,805,520 | 3 | 0 | 3 | 1 |
| Case 84 | 15 | 53,805,825 | 56,774,898 | 2 | 0 | 2 | 1 |
| Case 84 | 15 | 56,775,597 | 58,555,709 | 3 | 0 | 3 | 1 |
| Case 84 | 15 | 58,555,944 | 58,717,428 | 2 | 0 | 2 | 1 |
| Case 84 | 15 | 58,717,919 | 58,839,298 | 3 | 0 | 3 | 1 |
| Case 84 | 15 | 58,840,535 | 59,465,403 | 2 | 0 | 2 | 1 |
| Case 84 | 15 | 59,466,217 | 59,661,404 | 3 | 0 | 3 | 1 |
| Case 84 | 15 | 59,670,137 | 59,996,367 | 2 | 0 | 2 | 1 |
| Case 84 | 15 | 59,997,696 | 60,220,932 | 3 | 0 | 3 | 1 |
| Case 84 | 15 | 60,221,244 | 60,862,500 | 2 | 0 | 2 | 1 |
| Case 84 | 15 | 60,862,962 | 61,212,869 | 3 | 0 | 3 | 1 |
| Case 84 | 15 | 61,213,225 | 62,382,733 | 2 | 0 | 2 | 1 |
| Case 84 | 15 | 62,383,155 | 63,323,779 | 3 | 0 | 3 | 1 |
| Case 84 | 15 | 63,323,880 | 66,386,853 | 2 | 0 | 2 | 1 |
| Case 84 | 15 | 66,390,531 | 66,564,446 | 3 | 0 | 3 | 1 |
| Case 84 | 15 | 66,568,700 | 66,875,404 | 2 | 0 | 2 | 1 |
| Case 84 | 15 | 66,876,748 | 67,041,365 | 3 | 0 | 3 | 1 |
| Case 84 | 15 | 67,043,207 | 67,125,377 | 2 | 0 | 2 | 1 |
| Case 84 | 15 | 67,129,986 | 67,400,490 | 3 | 0 | 3 | 1 |
| Case 84 | 15 | 67,407,899 | 67,615,953 | 1 | 0 | 1 | 0 |
| Case 84 | 15 | 67,629,175 | 68,000,122 | 2 | 0 | 2 | 1 |
| Case 84 | 15 | 68,016,343 | 68,325,938 | 3 | 0 | 3 | 1 |
| Case 84 | 15 | 68,334,546 | 70,209,335 | 2 | 0 | 2 | 1 |
| Case 84 | 15 | 70,209,553 | 70,362,560 | 3 | 0 | 3 | 1 |
| Case 84 | 15 | 70,364,352 | 70,457,732 | 2 | 0 | 2 | 1 |
| Case 84 | 15 | 70,457,902 | 70,888,927 | 3 | 0 | 3 | 1 |
| Case 84 | 15 | 70,899,256 | 73,556,944 | 2 | 0 | 2 | 1 |
| Case 84 | 15 | 73,557,903 | 73,660,028 | 3 | 0 | 3 | 1 |
| Case 84 | 15 | 73,664,741 | 76,315,542 | 2 | 0 | 2 | 1 |
| Case 84 | 15 | 76,350,112 | 76,630,303 | 3 | 0 | 3 | 1 |
| Case 84 | 15 | 76,632,487 | 77,255,029 | 2 | 0 | 2 | 1 |
| Case 84 | 15 | 77,256,130 | 77,329,487 | 3 | 0 | 3 | 1 |
| Case 84 | 15 | 77,335,891 | 77,856,991 | 2 | 0 | 2 | 1 |
| Case 84 | 15 | 77,858,569 | 78,121,487 | 3 | 0 | 3 | 1 |
| Case 84 | 15 | 78,134,138 | 79,189,155 | 2 | 0 | 2 | 1 |
| Case 84 | 15 | 79,190,132 | 79,855,129 | 3 | 0 | 3 | 1 |
| Case 84 | 15 | 79,856,293 | 80,432,222 | 2 | 0 | 2 | 1 |
| Case 84 | 15 | 80,442,883 | 81,410,488 | 3 | 0 | 3 | 1 |
| Case 84 | 15 | 81,420,918 | 82,334,048 | 2 | 0 | 2 | 1 |
| Case 84 | 15 | 82,336,141 | 82,409,860 | 3 | 0 | 3 | 1 |
| Case 84 | 15 | 82,410,474 | 85,070,931 | 2 | 0 | 2 | 1 |
| Case 84 | 15 | 85,117,468 | 85,494,062 | 3 | 0 | 3 | 1 |
| Case 84 | 15 | 85,494,147 | 86,278,309 | 2 | 0 | 2 | 1 |
| Case 84 | 15 | 86,278,319 | 86,346,685 | 3 | 0 | 3 | 1 |
| Case 84 | 15 | 86,347,848 | 86,521,133 | 2 | 0 | 2 | 1 |
| Case 84 | 15 | 86,521,483 | 86,634,163 | 3 | 0 | 3 | 1 |
| Case 84 | 15 | 86,641,041 | 87,675,247 | 2 | 0 | 2 | 1 |
| Case 84 | 15 | 87,675,620 | 88,290,509 | 3 | 0 | 3 | 1 |
| Case 84 | 15 | 88,292,563 | 88,554,886 | 2 | 0 | 2 | 1 |
| Case 84 | 15 | 88,566,617 | 88,820,515 | 3 | 0 | 3 | 1 |
| Case 84 | 15 | 88,820,968 | 89,408,081 | 2 | 0 | 2 | 1 |

|         |    |             |             |   |   |   |   |
|---------|----|-------------|-------------|---|---|---|---|
| Case 84 | 15 | 89,412,279  | 89,698,538  | 3 | 0 | 3 | 1 |
| Case 84 | 15 | 89,700,675  | 90,347,814  | 2 | 0 | 2 | 1 |
| Case 84 | 15 | 90,348,335  | 90,446,501  | 3 | 0 | 3 | 1 |
| Case 84 | 15 | 90,447,042  | 91,354,521  | 2 | 0 | 2 | 1 |
| Case 84 | 15 | 91,354,551  | 91,765,766  | 3 | 0 | 3 | 1 |
| Case 84 | 15 | 91,768,400  | 91,878,370  | 2 | 0 | 2 | 1 |
| Case 84 | 15 | 91,878,867  | 92,517,358  | 3 | 0 | 3 | 1 |
| Case 84 | 15 | 92,518,451  | 92,770,506  | 2 | 0 | 2 | 1 |
| Case 84 | 15 | 92,770,579  | 93,131,632  | 3 | 0 | 3 | 1 |
| Case 84 | 15 | 93,131,931  | 93,681,470  | 2 | 0 | 2 | 1 |
| Case 84 | 15 | 93,682,229  | 93,926,846  | 3 | 0 | 3 | 1 |
| Case 84 | 15 | 93,927,305  | 95,019,927  | 2 | 0 | 2 | 1 |
| Case 84 | 15 | 95,019,969  | 95,284,905  | 3 | 0 | 3 | 1 |
| Case 84 | 15 | 95,286,328  | 99,409,548  | 2 | 0 | 2 | 1 |
| Case 84 | 15 | 99,412,562  | 99,616,720  | 3 | 0 | 3 | 1 |
| Case 84 | 15 | 99,618,168  | 99,916,332  | 2 | 0 | 2 | 1 |
| Case 84 | 15 | 99,925,021  | 100,269,596 | 3 | 0 | 3 | 1 |
| Case 84 | 15 | 100,269,614 | 100,424,605 | 2 | 0 | 2 | 1 |
| Case 84 | 15 | 100,424,858 | 100,808,087 | 3 | 0 | 3 | 1 |
| Case 84 | 15 | 100,809,358 | 101,244,413 | 2 | 0 | 2 | 1 |
| Case 84 | 15 | 101,244,572 | 101,440,988 | 3 | 0 | 3 | 1 |
| Case 84 | 15 | 101,442,436 | 101,592,856 | 2 | 0 | 2 | 1 |
| Case 84 | 15 | 101,593,219 | 101,779,863 | 3 | 0 | 3 | 1 |
| Case 84 | 15 | 101,781,934 | 101,919,191 | 2 | 0 | 2 | 1 |
| Case 84 | 15 | 101,919,297 | 102,211,876 | 3 | 0 | 3 | 1 |
| Case 84 | 15 | 102,215,815 | 102,461,162 | 2 | 0 | 2 | 1 |
| Case 84 | 16 | 88,165      | 14,042,070  | 2 | 0 | 2 | 1 |
| Case 84 | 16 | 14,042,077  | 14,140,337  | 3 | 0 | 3 | 1 |
| Case 84 | 16 | 14,141,090  | 17,211,635  | 2 | 0 | 2 | 1 |
| Case 84 | 16 | 17,211,722  | 17,409,998  | 3 | 0 | 3 | 1 |
| Case 84 | 16 | 17,411,635  | 20,982,832  | 2 | 0 | 2 | 1 |
| Case 84 | 16 | 20,986,506  | 21,110,478  | 4 | 0 | 4 | 1 |
| Case 84 | 16 | 21,113,272  | 25,563,680  | 2 | 0 | 2 | 1 |
| Case 84 | 16 | 25,565,967  | 27,481,681  | 2 | 2 | 4 | 0 |
| Case 84 | 16 | 27,489,852  | 27,786,289  | 2 | 1 | 3 | 0 |
| Case 84 | 16 | 27,786,313  | 29,824,508  | 2 | 2 | 4 | 0 |
| Case 84 | 16 | 29,824,809  | 29,965,496  | 2 | 0 | 2 | 1 |
| Case 84 | 16 | 29,968,015  | 30,364,712  | 3 | 0 | 3 | 1 |
| Case 84 | 16 | 30,364,805  | 35,285,582  | 2 | 0 | 2 | 1 |
| Case 84 | 16 | 46,450,037  | 51,279,824  | 2 | 0 | 2 | 1 |
| Case 84 | 16 | 51,289,593  | 51,451,319  | 2 | 2 | 4 | 0 |
| Case 84 | 16 | 51,457,948  | 52,447,414  | 2 | 0 | 2 | 1 |
| Case 84 | 16 | 52,453,567  | 52,840,949  | 3 | 0 | 3 | 1 |
| Case 84 | 16 | 52,848,236  | 55,594,811  | 2 | 0 | 2 | 1 |
| Case 84 | 16 | 55,600,672  | 57,422,519  | 2 | 2 | 4 | 0 |
| Case 84 | 16 | 57,436,153  | 57,683,127  | 4 | 1 | 5 | 0 |
| Case 84 | 16 | 57,684,213  | 57,732,847  | 2 | 1 | 3 | 0 |
| Case 84 | 16 | 57,734,141  | 58,097,357  | 2 | 0 | 2 | 1 |
| Case 84 | 16 | 58,104,664  | 58,201,628  | 4 | 0 | 4 | 1 |
| Case 84 | 16 | 58,202,107  | 61,419,025  | 2 | 0 | 2 | 1 |
| Case 84 | 16 | 61,436,948  | 61,870,462  | 2 | 2 | 4 | 0 |
| Case 84 | 16 | 61,883,401  | 66,608,800  | 2 | 0 | 2 | 1 |
| Case 84 | 16 | 66,609,668  | 69,067,538  | 2 | 1 | 3 | 0 |
| Case 84 | 16 | 69,074,247  | 69,329,590  | 2 | 0 | 2 | 1 |
| Case 84 | 16 | 69,334,737  | 69,474,517  | 3 | 0 | 3 | 1 |
| Case 84 | 16 | 69,481,071  | 69,481,071  | 2 | 0 | 2 | 1 |
| Case 84 | 16 | 69,496,384  | 69,646,122  | 4 | 0 | 4 | 1 |
| Case 84 | 16 | 69,660,329  | 70,031,958  | 2 | 0 | 2 | 1 |
| Case 84 | 16 | 70,073,957  | 70,513,384  | 3 | 0 | 3 | 1 |
| Case 84 | 16 | 70,513,554  | 70,841,656  | 4 | 0 | 4 | 1 |
| Case 84 | 16 | 70,841,658  | 71,158,111  | 3 | 0 | 3 | 1 |

|         |    |            |            |   |   |   |   |
|---------|----|------------|------------|---|---|---|---|
| Case 84 | 16 | 71,163,613 | 74,349,043 | 4 | 0 | 4 | 1 |
| Case 84 | 16 | 74,366,251 | 74,729,501 | 3 | 0 | 3 | 1 |
| Case 84 | 16 | 74,729,601 | 75,924,274 | 4 | 0 | 4 | 1 |
| Case 84 | 16 | 75,928,610 | 76,555,200 | 3 | 2 | 5 | 0 |
| Case 84 | 16 | 76,555,205 | 77,684,529 | 4 | 0 | 4 | 1 |
| Case 84 | 16 | 77,685,690 | 78,684,329 | 3 | 2 | 5 | 0 |
| Case 84 | 16 | 78,688,144 | 78,718,027 | 4 | 0 | 4 | 1 |
| Case 84 | 16 | 78,719,199 | 80,513,030 | 3 | 2 | 5 | 0 |
| Case 84 | 16 | 80,514,918 | 82,519,228 | 4 | 0 | 4 | 1 |
| Case 84 | 16 | 82,521,530 | 83,310,856 | 3 | 2 | 5 | 0 |
| Case 84 | 16 | 83,316,624 | 84,050,264 | 4 | 0 | 4 | 1 |
| Case 84 | 16 | 84,050,265 | 84,209,660 | 3 | 0 | 3 | 1 |
| Case 84 | 16 | 84,209,731 | 84,221,962 | 4 | 0 | 4 | 1 |
| Case 84 | 16 | 84,223,361 | 84,234,231 | 3 | 2 | 5 | 0 |
| Case 84 | 16 | 84,234,740 | 85,590,786 | 4 | 0 | 4 | 1 |
| Case 84 | 16 | 85,596,267 | 85,712,105 | 3 | 2 | 5 | 0 |
| Case 84 | 16 | 85,712,245 | 85,801,365 | 4 | 0 | 4 | 1 |
| Case 84 | 16 | 85,809,294 | 85,993,295 | 3 | 0 | 3 | 1 |
| Case 84 | 16 | 85,995,227 | 85,995,227 | 2 | 0 | 2 | 1 |
| Case 84 | 16 | 85,996,080 | 86,301,948 | 4 | 0 | 4 | 1 |
| Case 84 | 16 | 86,302,072 | 87,110,471 | 3 | 0 | 3 | 1 |
| Case 84 | 16 | 87,111,021 | 87,111,021 | 2 | 0 | 2 | 1 |
| Case 84 | 16 | 87,112,655 | 87,284,177 | 4 | 0 | 4 | 1 |
| Case 84 | 16 | 87,286,546 | 88,691,401 | 3 | 0 | 3 | 1 |
| Case 84 | 16 | 88,695,167 | 89,349,372 | 3 | 1 | 4 | 0 |
| Case 84 | 16 | 89,349,387 | 89,392,315 | 2 | 1 | 3 | 0 |
| Case 84 | 16 | 89,420,356 | 89,422,823 | 4 | 0 | 4 | 1 |
| Case 84 | 16 | 89,427,319 | 89,726,484 | 3 | 0 | 3 | 1 |
| Case 84 | 16 | 89,727,595 | 89,836,978 | 2 | 0 | 2 | 1 |
| Case 84 | 16 | 89,838,086 | 90,274,695 | 3 | 0 | 3 | 1 |
| Case 84 | 17 | 11,885     | 1,151,592  | 2 | 0 | 2 | 1 |
| Case 84 | 17 | 1,154,536  | 1,370,459  | 4 | 0 | 4 | 1 |
| Case 84 | 17 | 1,370,542  | 1,400,040  | 3 | 0 | 3 | 1 |
| Case 84 | 17 | 1,400,067  | 7,011,225  | 2 | 0 | 2 | 1 |
| Case 84 | 17 | 7,011,782  | 7,339,884  | 3 | 0 | 3 | 1 |
| Case 84 | 17 | 7,340,025  | 22,242,355 | 2 | 0 | 2 | 1 |
| Case 84 | 17 | 25,268,142 | 34,436,708 | 2 | 1 | 3 | 0 |
| Case 84 | 17 | 34,443,811 | 34,597,521 | 4 | 1 | 5 | 0 |
| Case 84 | 17 | 34,815,551 | 57,709,814 | 2 | 1 | 3 | 0 |
| Case 84 | 17 | 57,724,829 | 57,930,646 | 1 | 1 | 2 | 0 |
| Case 84 | 17 | 57,934,169 | 73,812,909 | 2 | 1 | 3 | 0 |
| Case 84 | 17 | 73,812,937 | 73,945,529 | 2 | 2 | 4 | 0 |
| Case 84 | 17 | 73,945,640 | 79,433,106 | 2 | 1 | 3 | 0 |
| Case 84 | 17 | 79,441,807 | 79,483,999 | 2 | 0 | 2 | 1 |
| Case 84 | 17 | 79,487,491 | 80,373,453 | 2 | 1 | 3 | 0 |
| Case 84 | 17 | 80,374,899 | 80,544,980 | 2 | 0 | 2 | 1 |
| Case 84 | 17 | 80,544,993 | 81,060,040 | 2 | 1 | 3 | 0 |
| Case 84 | 18 | 87,505     | 629,035    | 3 | 1 | 4 | 0 |
| Case 84 | 18 | 631,211    | 2,586,907  | 3 | 2 | 5 | 0 |
| Case 84 | 18 | 2,589,239  | 2,616,500  | 4 | 1 | 5 | 0 |
| Case 84 | 18 | 2,621,407  | 5,252,119  | 3 | 1 | 4 | 0 |
| Case 84 | 18 | 5,252,280  | 6,961,491  | 4 | 1 | 5 | 0 |
| Case 84 | 18 | 6,961,610  | 7,050,910  | 3 | 1 | 4 | 0 |
| Case 84 | 18 | 7,054,431  | 11,748,216 | 4 | 1 | 5 | 0 |
| Case 84 | 18 | 11,749,198 | 12,358,902 | 3 | 1 | 4 | 0 |
| Case 84 | 18 | 12,362,219 | 12,898,134 | 4 | 1 | 5 | 0 |
| Case 84 | 18 | 12,899,342 | 15,375,878 | 3 | 1 | 4 | 0 |
| Case 84 | 18 | 18,520,354 | 18,737,524 | 3 | 1 | 4 | 0 |
| Case 84 | 18 | 18,737,664 | 19,536,542 | 2 | 1 | 3 | 0 |
| Case 84 | 18 | 19,540,467 | 19,710,668 | 4 | 1 | 5 | 0 |
| Case 84 | 18 | 19,721,331 | 24,505,253 | 3 | 1 | 4 | 0 |

|         |    |            |            |   |   |   |   |
|---------|----|------------|------------|---|---|---|---|
| Case 84 | 18 | 24,505,955 | 25,134,546 | 2 | 1 | 3 | 0 |
| Case 84 | 18 | 25,144,165 | 25,440,258 | 2 | 2 | 4 | 0 |
| Case 84 | 18 | 25,444,241 | 28,666,627 | 2 | 1 | 3 | 0 |
| Case 84 | 18 | 28,666,679 | 30,574,507 | 2 | 2 | 4 | 0 |
| Case 84 | 18 | 30,577,619 | 38,850,517 | 2 | 1 | 3 | 0 |
| Case 84 | 18 | 38,857,660 | 49,976,719 | 2 | 0 | 2 | 1 |
| Case 84 | 18 | 49,988,133 | 50,140,929 | 2 | 2 | 4 | 0 |
| Case 84 | 18 | 50,142,425 | 53,489,366 | 2 | 1 | 3 | 0 |
| Case 84 | 18 | 53,495,479 | 53,605,893 | 4 | 1 | 5 | 0 |
| Case 84 | 18 | 53,606,519 | 54,424,198 | 3 | 1 | 4 | 0 |
| Case 84 | 18 | 54,424,267 | 55,654,318 | 2 | 2 | 4 | 0 |
| Case 84 | 18 | 55,655,487 | 68,197,110 | 2 | 0 | 2 | 1 |
| Case 84 | 18 | 68,199,224 | 69,096,150 | 3 | 0 | 3 | 1 |
| Case 84 | 18 | 69,099,608 | 69,414,120 | 2 | 0 | 2 | 1 |
| Case 84 | 18 | 69,418,494 | 76,856,627 | 3 | 0 | 3 | 1 |
| Case 84 | 18 | 76,868,631 | 77,122,830 | 2 | 0 | 2 | 1 |
| Case 84 | 18 | 77,129,563 | 78,015,180 | 3 | 0 | 3 | 1 |
| Case 84 | 19 | 260,912    | 2,930,806  | 2 | 0 | 2 | 1 |
| Case 84 | 19 | 2,933,283  | 2,936,664  | 1 | 0 | 1 | 0 |
| Case 84 | 19 | 2,939,366  | 3,979,842  | 2 | 0 | 2 | 1 |
| Case 84 | 19 | 3,981,387  | 4,118,871  | 3 | 0 | 3 | 1 |
| Case 84 | 19 | 4,119,012  | 9,868,404  | 2 | 0 | 2 | 1 |
| Case 84 | 19 | 9,868,449  | 9,872,907  | 1 | 0 | 1 | 0 |
| Case 84 | 19 | 9,873,963  | 11,879,420 | 2 | 0 | 2 | 1 |
| Case 84 | 19 | 11,881,346 | 12,244,289 | 1 | 0 | 1 | 0 |
| Case 84 | 19 | 12,244,624 | 12,450,622 | 2 | 0 | 2 | 1 |
| Case 84 | 19 | 12,450,725 | 12,462,101 | 1 | 0 | 1 | 0 |
| Case 84 | 19 | 12,462,839 | 12,940,737 | 2 | 0 | 2 | 1 |
| Case 84 | 19 | 12,942,750 | 13,211,515 | 3 | 0 | 3 | 1 |
| Case 84 | 19 | 13,211,521 | 19,822,049 | 2 | 0 | 2 | 1 |
| Case 84 | 19 | 19,822,451 | 19,823,734 | 1 | 0 | 1 | 0 |
| Case 84 | 19 | 19,824,850 | 21,178,242 | 2 | 0 | 2 | 1 |
| Case 84 | 19 | 21,180,787 | 21,300,054 | 1 | 0 | 1 | 0 |
| Case 84 | 19 | 21,300,992 | 23,804,041 | 2 | 0 | 2 | 1 |
| Case 84 | 19 | 23,814,365 | 23,937,693 | 1 | 0 | 1 | 0 |
| Case 84 | 19 | 23,938,402 | 24,629,285 | 2 | 0 | 2 | 1 |
| Case 84 | 19 | 27,732,159 | 28,792,480 | 6 | 1 | 7 | 0 |
| Case 84 | 19 | 28,792,896 | 28,792,896 | 3 | 1 | 4 | 0 |
| Case 84 | 19 | 28,796,676 | 36,003,538 | 5 | 1 | 6 | 0 |
| Case 84 | 19 | 36,003,591 | 36,003,591 | 1 | 1 | 2 | 0 |
| Case 84 | 19 | 36,003,721 | 36,277,957 | 4 | 1 | 5 | 0 |
| Case 84 | 19 | 36,278,111 | 36,987,525 | 5 | 1 | 6 | 0 |
| Case 84 | 19 | 37,004,938 | 37,739,801 | 6 | 1 | 7 | 0 |
| Case 84 | 19 | 37,796,891 | 37,823,811 | 2 | 1 | 3 | 0 |
| Case 84 | 19 | 37,835,658 | 38,709,609 | 6 | 1 | 7 | 0 |
| Case 84 | 19 | 38,713,568 | 39,826,479 | 3 | 1 | 4 | 0 |
| Case 84 | 19 | 39,826,597 | 40,008,118 | 4 | 1 | 5 | 0 |
| Case 84 | 19 | 40,009,100 | 42,171,906 | 3 | 1 | 4 | 0 |
| Case 84 | 19 | 42,175,160 | 42,455,840 | 3 | 2 | 5 | 0 |
| Case 84 | 19 | 42,460,159 | 42,462,788 | 4 | 0 | 4 | 1 |
| Case 84 | 19 | 42,462,898 | 43,371,294 | 3 | 1 | 4 | 0 |
| Case 84 | 19 | 43,372,386 | 43,439,793 | 4 | 1 | 5 | 0 |
| Case 84 | 19 | 43,441,194 | 43,519,270 | 6 | 1 | 7 | 0 |
| Case 84 | 19 | 43,519,304 | 43,519,304 | 4 | 1 | 5 | 0 |
| Case 84 | 19 | 43,519,442 | 57,132,677 | 3 | 1 | 4 | 0 |
| Case 84 | 19 | 57,132,687 | 57,181,967 | 2 | 1 | 3 | 0 |
| Case 84 | 19 | 57,182,045 | 57,273,811 | 2 | 2 | 4 | 0 |
| Case 84 | 19 | 57,279,391 | 57,359,432 | 2 | 1 | 3 | 0 |
| Case 84 | 19 | 57,372,498 | 57,487,513 | 2 | 2 | 4 | 0 |
| Case 84 | 19 | 57,488,382 | 59,097,160 | 2 | 1 | 3 | 0 |
| Case 84 | 20 | 63,244     | 1,235,040  | 4 | 0 | 4 | 1 |

|         |    |            |            |   |   |   |   |
|---------|----|------------|------------|---|---|---|---|
| Case 84 | 20 | 1,248,286  | 1,352,322  | 3 | 2 | 5 | 0 |
| Case 84 | 20 | 1,358,272  | 1,612,491  | 4 | 0 | 4 | 1 |
| Case 84 | 20 | 1,612,700  | 1,941,488  | 3 | 2 | 5 | 0 |
| Case 84 | 20 | 1,942,718  | 2,597,560  | 4 | 0 | 4 | 1 |
| Case 84 | 20 | 2,597,716  | 2,992,928  | 3 | 1 | 4 | 0 |
| Case 84 | 20 | 3,003,027  | 3,553,472  | 3 | 2 | 5 | 0 |
| Case 84 | 20 | 3,555,910  | 4,648,538  | 3 | 3 | 6 | 0 |
| Case 84 | 20 | 4,649,276  | 4,680,094  | 4 | 2 | 6 | 0 |
| Case 84 | 20 | 4,680,290  | 5,924,640  | 3 | 2 | 5 | 0 |
| Case 84 | 20 | 5,931,473  | 6,767,642  | 3 | 3 | 6 | 0 |
| Case 84 | 20 | 6,769,533  | 8,121,097  | 4 | 2 | 6 | 0 |
| Case 84 | 20 | 8,124,354  | 8,795,984  | 3 | 2 | 5 | 0 |
| Case 84 | 20 | 8,808,310  | 10,337,546 | 3 | 3 | 6 | 0 |
| Case 84 | 20 | 10,340,037 | 10,386,055 | 4 | 2 | 6 | 0 |
| Case 84 | 20 | 10,386,059 | 11,347,455 | 3 | 2 | 5 | 0 |
| Case 84 | 20 | 11,367,780 | 11,703,372 | 4 | 0 | 4 | 1 |
| Case 84 | 20 | 11,716,825 | 11,742,799 | 3 | 2 | 5 | 0 |
| Case 84 | 20 | 11,748,386 | 11,939,516 | 4 | 0 | 4 | 1 |
| Case 84 | 20 | 11,942,854 | 11,967,343 | 3 | 2 | 5 | 0 |
| Case 84 | 20 | 11,970,685 | 12,173,825 | 4 | 0 | 4 | 1 |
| Case 84 | 20 | 12,175,478 | 13,079,469 | 3 | 2 | 5 | 0 |
| Case 84 | 20 | 13,082,281 | 13,765,507 | 3 | 3 | 6 | 0 |
| Case 84 | 20 | 13,765,892 | 14,727,386 | 4 | 1 | 5 | 0 |
| Case 84 | 20 | 14,729,891 | 14,742,886 | 2 | 1 | 3 | 0 |
| Case 84 | 20 | 14,745,223 | 14,926,333 | 2 | 0 | 2 | 1 |
| Case 84 | 20 | 14,926,362 | 14,931,186 | 2 | 1 | 3 | 0 |
| Case 84 | 20 | 14,936,935 | 15,071,192 | 4 | 1 | 5 | 0 |
| Case 84 | 20 | 15,071,428 | 15,135,938 | 3 | 1 | 4 | 0 |
| Case 84 | 20 | 15,139,048 | 15,375,124 | 4 | 1 | 5 | 0 |
| Case 84 | 20 | 15,375,822 | 15,395,647 | 2 | 1 | 3 | 0 |
| Case 84 | 20 | 15,397,928 | 15,649,366 | 2 | 2 | 4 | 0 |
| Case 84 | 20 | 15,651,887 | 16,317,350 | 4 | 1 | 5 | 0 |
| Case 84 | 20 | 16,317,636 | 16,385,494 | 3 | 1 | 4 | 0 |
| Case 84 | 20 | 16,393,851 | 17,735,508 | 3 | 2 | 5 | 0 |
| Case 84 | 20 | 17,736,753 | 17,931,095 | 3 | 3 | 6 | 0 |
| Case 84 | 20 | 17,933,320 | 18,143,551 | 3 | 1 | 4 | 0 |
| Case 84 | 20 | 18,146,703 | 19,583,374 | 3 | 2 | 5 | 0 |
| Case 84 | 20 | 19,585,661 | 24,713,912 | 4 | 0 | 4 | 1 |
| Case 84 | 20 | 24,715,544 | 25,599,776 | 3 | 0 | 3 | 1 |
| Case 84 | 20 | 25,604,536 | 25,604,536 | 2 | 0 | 2 | 1 |
| Case 84 | 20 | 25,604,572 | 26,293,985 | 4 | 0 | 4 | 1 |
| Case 84 | 20 | 29,425,357 | 29,846,402 | 4 | 0 | 4 | 1 |
| Case 84 | 20 | 29,847,314 | 31,671,577 | 3 | 0 | 3 | 1 |
| Case 84 | 20 | 31,671,580 | 32,085,168 | 2 | 2 | 4 | 0 |
| Case 84 | 20 | 32,110,204 | 32,110,204 | 2 | 1 | 3 | 0 |
| Case 84 | 20 | 32,140,287 | 32,527,128 | 6 | 1 | 7 | 0 |
| Case 84 | 20 | 32,535,305 | 33,000,437 | 3 | 1 | 4 | 0 |
| Case 84 | 20 | 33,000,444 | 33,874,784 | 4 | 0 | 4 | 1 |
| Case 84 | 20 | 33,874,855 | 34,568,544 | 3 | 0 | 3 | 1 |
| Case 84 | 20 | 34,571,484 | 34,593,558 | 4 | 0 | 4 | 1 |
| Case 84 | 20 | 34,596,371 | 34,785,938 | 3 | 2 | 5 | 0 |
| Case 84 | 20 | 34,793,497 | 39,471,724 | 4 | 0 | 4 | 1 |
| Case 84 | 20 | 39,473,115 | 39,589,528 | 3 | 2 | 5 | 0 |
| Case 84 | 20 | 39,592,520 | 39,988,252 | 4 | 0 | 4 | 1 |
| Case 84 | 20 | 39,990,159 | 40,769,924 | 3 | 2 | 5 | 0 |
| Case 84 | 20 | 40,775,576 | 43,695,762 | 4 | 0 | 4 | 1 |
| Case 84 | 20 | 43,701,355 | 46,147,566 | 3 | 1 | 4 | 0 |
| Case 84 | 20 | 46,153,148 | 47,634,040 | 3 | 2 | 5 | 0 |
| Case 84 | 20 | 47,645,205 | 47,721,092 | 3 | 3 | 6 | 0 |
| Case 84 | 20 | 47,731,767 | 48,043,810 | 4 | 1 | 5 | 0 |
| Case 84 | 20 | 48,048,123 | 50,175,535 | 3 | 1 | 4 | 0 |

|         |    |             |             |   |   |   |   |
|---------|----|-------------|-------------|---|---|---|---|
| Case 84 | 20 | 50,181,272  | 50,445,716  | 3 | 2 | 5 | 0 |
| Case 84 | 20 | 50,446,692  | 51,740,178  | 3 | 3 | 6 | 0 |
| Case 84 | 20 | 51,741,616  | 52,808,779  | 3 | 1 | 4 | 0 |
| Case 84 | 20 | 52,809,296  | 54,333,756  | 3 | 2 | 5 | 0 |
| Case 84 | 20 | 54,336,181  | 54,359,883  | 4 | 0 | 4 | 1 |
| Case 84 | 20 | 54,361,346  | 54,998,544  | 3 | 1 | 4 | 0 |
| Case 84 | 20 | 55,006,888  | 55,686,994  | 4 | 0 | 4 | 1 |
| Case 84 | 20 | 55,689,894  | 56,206,279  | 3 | 0 | 3 | 1 |
| Case 84 | 20 | 56,206,309  | 56,217,386  | 2 | 0 | 2 | 1 |
| Case 84 | 20 | 56,223,061  | 58,364,597  | 4 | 0 | 4 | 1 |
| Case 84 | 20 | 58,374,386  | 58,645,895  | 3 | 0 | 3 | 1 |
| Case 84 | 20 | 58,647,687  | 58,647,687  | 2 | 0 | 2 | 1 |
| Case 84 | 20 | 58,648,660  | 58,839,876  | 4 | 0 | 4 | 1 |
| Case 84 | 20 | 58,842,690  | 62,948,788  | 3 | 1 | 4 | 0 |
| Case 84 | 21 | 10,827,533  | 10,971,337  | 2 | 1 | 3 | 0 |
| Case 84 | 21 | 14,368,320  | 29,275,627  | 2 | 1 | 3 | 0 |
| Case 84 | 21 | 29,299,378  | 29,428,642  | 2 | 0 | 2 | 1 |
| Case 84 | 21 | 29,435,419  | 29,850,549  | 1 | 0 | 1 | 0 |
| Case 84 | 21 | 29,853,103  | 29,853,103  | 2 | 0 | 2 | 1 |
| Case 84 | 21 | 29,853,569  | 34,588,494  | 2 | 1 | 3 | 0 |
| Case 84 | 21 | 34,590,090  | 34,619,126  | 2 | 2 | 4 | 0 |
| Case 84 | 21 | 34,620,113  | 34,804,538  | 3 | 1 | 4 | 0 |
| Case 84 | 21 | 34,805,023  | 42,870,522  | 2 | 1 | 3 | 0 |
| Case 84 | 21 | 42,871,273  | 43,102,001  | 2 | 2 | 4 | 0 |
| Case 84 | 21 | 43,102,097  | 45,773,590  | 2 | 1 | 3 | 0 |
| Case 84 | 21 | 45,773,615  | 45,919,761  | 2 | 2 | 4 | 0 |
| Case 84 | 21 | 45,924,741  | 48,100,155  | 2 | 1 | 3 | 0 |
| Case 84 | 22 | 16,114,244  | 21,927,064  | 2 | 0 | 2 | 1 |
| Case 84 | 22 | 21,928,641  | 22,098,687  | 4 | 0 | 4 | 1 |
| Case 84 | 22 | 22,106,535  | 50,280,759  | 2 | 0 | 2 | 1 |
| Case 84 | 22 | 50,281,344  | 50,509,196  | 3 | 0 | 3 | 1 |
| Case 84 | 22 | 50,510,258  | 51,195,728  | 2 | 0 | 2 | 1 |
| Case 85 | 1  | 82,154      | 2,938,697   | 2 | 0 | 2 | 1 |
| Case 85 | 1  | 2,938,800   | 3,220,101   | 2 | 1 | 3 | 0 |
| Case 85 | 1  | 3,221,371   | 19,119,910  | 2 | 0 | 2 | 1 |
| Case 85 | 1  | 19,122,339  | 28,005,102  | 1 | 1 | 2 | 0 |
| Case 85 | 1  | 28,011,854  | 28,599,878  | 1 | 0 | 1 | 0 |
| Case 85 | 1  | 28,599,897  | 121,346,616 | 1 | 1 | 2 | 0 |
| Case 85 | 1  | 142,649,718 | 242,977,333 | 1 | 1 | 2 | 0 |
| Case 85 | 1  | 242,982,864 | 244,544,441 | 2 | 1 | 3 | 0 |
| Case 85 | 1  | 244,544,818 | 249,218,992 | 1 | 1 | 2 | 0 |
| Case 85 | 2  | 18,674      | 92,081,640  | 1 | 1 | 2 | 0 |
| Case 85 | 2  | 95,429,424  | 243,048,760 | 1 | 1 | 2 | 0 |
| Case 85 | 3  | 61,495      | 9,646,987   | 1 | 1 | 2 | 0 |
| Case 85 | 3  | 9,649,470   | 10,321,734  | 1 | 0 | 1 | 0 |
| Case 85 | 3  | 10,322,521  | 12,226,031  | 1 | 1 | 2 | 0 |
| Case 85 | 3  | 12,230,704  | 12,806,123  | 1 | 0 | 1 | 0 |
| Case 85 | 3  | 12,818,103  | 15,410,365  | 1 | 1 | 2 | 0 |
| Case 85 | 3  | 15,427,117  | 16,811,826  | 1 | 0 | 1 | 0 |
| Case 85 | 3  | 16,812,671  | 19,450,214  | 1 | 1 | 2 | 0 |
| Case 85 | 3  | 19,457,107  | 21,241,148  | 1 | 0 | 1 | 0 |
| Case 85 | 3  | 21,248,642  | 31,593,820  | 1 | 1 | 2 | 0 |
| Case 85 | 3  | 31,617,966  | 33,736,126  | 1 | 0 | 1 | 0 |
| Case 85 | 3  | 33,745,827  | 36,898,991  | 1 | 1 | 2 | 0 |
| Case 85 | 3  | 36,900,362  | 37,526,959  | 1 | 0 | 1 | 0 |
| Case 85 | 3  | 37,529,636  | 44,489,700  | 1 | 1 | 2 | 0 |
| Case 85 | 3  | 44,489,755  | 44,893,288  | 1 | 0 | 1 | 0 |
| Case 85 | 3  | 44,893,346  | 47,018,127  | 1 | 1 | 2 | 0 |
| Case 85 | 3  | 47,024,495  | 49,689,675  | 1 | 0 | 1 | 0 |
| Case 85 | 3  | 49,690,199  | 57,053,921  | 1 | 1 | 2 | 0 |
| Case 85 | 3  | 57,055,271  | 57,961,370  | 1 | 0 | 1 | 0 |

|         |   |             |             |   |   |   |   |
|---------|---|-------------|-------------|---|---|---|---|
| Case 85 | 3 | 57,965,749  | 69,033,283  | 1 | 1 | 2 | 0 |
| Case 85 | 3 | 69,034,315  | 69,512,024  | 1 | 0 | 1 | 0 |
| Case 85 | 3 | 69,513,028  | 75,388,161  | 1 | 1 | 2 | 0 |
| Case 85 | 3 | 75,390,501  | 77,084,262  | 1 | 0 | 1 | 0 |
| Case 85 | 3 | 77,086,844  | 80,147,995  | 1 | 1 | 2 | 0 |
| Case 85 | 3 | 80,158,184  | 90,442,925  | 1 | 0 | 1 | 0 |
| Case 85 | 3 | 93,537,290  | 97,550,849  | 1 | 0 | 1 | 0 |
| Case 85 | 3 | 97,570,446  | 113,187,648 | 2 | 0 | 2 | 1 |
| Case 85 | 3 | 113,187,675 | 113,187,981 | 2 | 1 | 3 | 0 |
| Case 85 | 3 | 113,207,804 | 113,251,977 | 7 | 0 | 7 | 1 |
| Case 85 | 3 | 113,255,143 | 113,259,413 | 1 | 1 | 2 | 0 |
| Case 85 | 3 | 113,264,994 | 146,376,541 | 2 | 0 | 2 | 1 |
| Case 85 | 3 | 146,381,657 | 149,519,843 | 3 | 0 | 3 | 1 |
| Case 85 | 3 | 149,531,177 | 149,660,475 | 2 | 0 | 2 | 1 |
| Case 85 | 3 | 149,668,016 | 154,603,598 | 4 | 0 | 4 | 1 |
| Case 85 | 3 | 154,650,506 | 154,767,233 | 1 | 1 | 2 | 0 |
| Case 85 | 3 | 154,787,433 | 157,271,099 | 3 | 0 | 3 | 1 |
| Case 85 | 3 | 157,278,882 | 157,278,882 | 4 | 0 | 4 | 1 |
| Case 85 | 3 | 157,283,248 | 157,288,885 | 2 | 0 | 2 | 1 |
| Case 85 | 3 | 157,289,766 | 160,131,274 | 4 | 0 | 4 | 1 |
| Case 85 | 3 | 160,131,347 | 170,347,683 | 3 | 0 | 3 | 1 |
| Case 85 | 3 | 170,362,619 | 171,443,851 | 4 | 0 | 4 | 1 |
| Case 85 | 3 | 171,452,645 | 171,463,272 | 1 | 1 | 2 | 0 |
| Case 85 | 3 | 171,477,953 | 172,480,522 | 1 | 0 | 1 | 0 |
| Case 85 | 3 | 172,480,580 | 178,556,483 | 1 | 1 | 2 | 0 |
| Case 85 | 3 | 178,569,163 | 183,882,366 | 1 | 0 | 1 | 0 |
| Case 85 | 3 | 183,882,713 | 186,435,370 | 1 | 1 | 2 | 0 |
| Case 85 | 3 | 186,435,412 | 186,665,645 | 1 | 0 | 1 | 0 |
| Case 85 | 3 | 186,666,546 | 188,741,418 | 1 | 1 | 2 | 0 |
| Case 85 | 3 | 188,757,737 | 189,816,756 | 1 | 0 | 1 | 0 |
| Case 85 | 3 | 189,822,654 | 195,477,779 | 1 | 1 | 2 | 0 |
| Case 85 | 3 | 195,477,791 | 197,838,262 | 1 | 0 | 1 | 0 |
| Case 85 | 4 | 71,566      | 99,926      | 1 | 1 | 2 | 0 |
| Case 85 | 4 | 109,596     | 3,136,138   | 1 | 0 | 1 | 0 |
| Case 85 | 4 | 3,138,013   | 49,620,898  | 1 | 1 | 2 | 0 |
| Case 85 | 4 | 52,697,856  | 62,290,634  | 1 | 1 | 2 | 0 |
| Case 85 | 4 | 62,293,449  | 65,750,373  | 1 | 0 | 1 | 0 |
| Case 85 | 4 | 65,751,266  | 68,074,583  | 1 | 1 | 2 | 0 |
| Case 85 | 4 | 68,075,795  | 70,709,794  | 1 | 0 | 1 | 0 |
| Case 85 | 4 | 70,710,656  | 71,626,572  | 1 | 1 | 2 | 0 |
| Case 85 | 4 | 71,629,345  | 72,083,374  | 1 | 0 | 1 | 0 |
| Case 85 | 4 | 72,084,653  | 76,421,029  | 1 | 1 | 2 | 0 |
| Case 85 | 4 | 76,431,119  | 77,305,566  | 1 | 0 | 1 | 0 |
| Case 85 | 4 | 77,305,720  | 82,992,937  | 1 | 1 | 2 | 0 |
| Case 85 | 4 | 82,996,183  | 84,580,859  | 1 | 0 | 1 | 0 |
| Case 85 | 4 | 84,584,157  | 86,426,882  | 1 | 1 | 2 | 0 |
| Case 85 | 4 | 86,432,381  | 88,533,290  | 1 | 0 | 1 | 0 |
| Case 85 | 4 | 88,533,296  | 90,833,372  | 1 | 1 | 2 | 0 |
| Case 85 | 4 | 90,833,421  | 96,025,586  | 1 | 0 | 1 | 0 |
| Case 85 | 4 | 96,025,591  | 99,636,215  | 1 | 1 | 2 | 0 |
| Case 85 | 4 | 99,636,952  | 100,141,240 | 1 | 0 | 1 | 0 |
| Case 85 | 4 | 100,142,302 | 105,933,321 | 1 | 1 | 2 | 0 |
| Case 85 | 4 | 105,936,370 | 108,040,751 | 1 | 0 | 1 | 0 |
| Case 85 | 4 | 108,041,804 | 110,324,528 | 1 | 1 | 2 | 0 |
| Case 85 | 4 | 110,350,409 | 111,198,328 | 1 | 0 | 1 | 0 |
| Case 85 | 4 | 111,211,272 | 113,356,363 | 1 | 1 | 2 | 0 |
| Case 85 | 4 | 113,356,927 | 113,972,856 | 1 | 0 | 1 | 0 |
| Case 85 | 4 | 113,973,952 | 115,581,365 | 1 | 1 | 2 | 0 |
| Case 85 | 4 | 115,583,723 | 117,562,565 | 1 | 0 | 1 | 0 |
| Case 85 | 4 | 117,568,631 | 123,342,477 | 1 | 1 | 2 | 0 |
| Case 85 | 4 | 123,342,616 | 124,754,548 | 1 | 0 | 1 | 0 |

|         |   |             |             |   |   |   |   |
|---------|---|-------------|-------------|---|---|---|---|
| Case 85 | 4 | 124,757,420 | 128,628,100 | 1 | 1 | 2 | 0 |
| Case 85 | 4 | 128,631,859 | 137,744,065 | 1 | 0 | 1 | 0 |
| Case 85 | 4 | 137,745,250 | 138,739,406 | 1 | 1 | 2 | 0 |
| Case 85 | 4 | 138,762,626 | 139,211,038 | 2 | 0 | 2 | 1 |
| Case 85 | 4 | 139,212,420 | 139,274,999 | 1 | 1 | 2 | 0 |
| Case 85 | 4 | 139,275,208 | 172,808,394 | 3 | 0 | 3 | 1 |
| Case 85 | 4 | 172,812,489 | 189,892,200 | 2 | 0 | 2 | 1 |
| Case 85 | 4 | 189,896,929 | 189,914,135 | 1 | 1 | 2 | 0 |
| Case 85 | 4 | 189,917,515 | 190,963,766 | 1 | 0 | 1 | 0 |
| Case 85 | 5 | 38,139      | 45,467,538  | 1 | 1 | 2 | 0 |
| Case 85 | 5 | 45,477,535  | 46,399,093  | 1 | 0 | 1 | 0 |
| Case 85 | 5 | 49,457,282  | 49,646,456  | 1 | 0 | 1 | 0 |
| Case 85 | 5 | 49,648,025  | 139,930,726 | 1 | 1 | 2 | 0 |
| Case 85 | 5 | 139,930,736 | 139,931,652 | 1 | 0 | 1 | 0 |
| Case 85 | 5 | 139,931,653 | 180,693,127 | 1 | 1 | 2 | 0 |
| Case 85 | 6 | 108,666     | 32,413,545  | 1 | 1 | 2 | 0 |
| Case 85 | 6 | 32,413,557  | 32,684,069  | 2 | 0 | 2 | 1 |
| Case 85 | 6 | 32,684,257  | 58,752,089  | 1 | 1 | 2 | 0 |
| Case 85 | 6 | 61,891,118  | 73,905,177  | 1 | 1 | 2 | 0 |
| Case 85 | 6 | 73,907,138  | 74,541,452  | 1 | 0 | 1 | 0 |
| Case 85 | 6 | 74,542,387  | 75,461,596  | 1 | 1 | 2 | 0 |
| Case 85 | 6 | 75,461,657  | 76,550,730  | 1 | 0 | 1 | 0 |
| Case 85 | 6 | 76,552,776  | 80,715,838  | 1 | 1 | 2 | 0 |
| Case 85 | 6 | 80,717,615  | 84,005,867  | 1 | 0 | 1 | 0 |
| Case 85 | 6 | 84,017,921  | 84,895,018  | 1 | 1 | 2 | 0 |
| Case 85 | 6 | 84,895,024  | 85,434,491  | 1 | 0 | 1 | 0 |
| Case 85 | 6 | 85,435,275  | 87,028,147  | 1 | 1 | 2 | 0 |
| Case 85 | 6 | 87,041,092  | 88,654,437  | 1 | 0 | 1 | 0 |
| Case 85 | 6 | 88,655,566  | 90,075,796  | 1 | 1 | 2 | 0 |
| Case 85 | 6 | 90,076,384  | 90,625,166  | 1 | 0 | 1 | 0 |
| Case 85 | 6 | 90,629,110  | 95,578,465  | 1 | 1 | 2 | 0 |
| Case 85 | 6 | 95,592,790  | 96,861,476  | 1 | 0 | 1 | 0 |
| Case 85 | 6 | 96,894,328  | 102,270,322 | 1 | 1 | 2 | 0 |
| Case 85 | 6 | 102,283,963 | 103,945,307 | 1 | 0 | 1 | 0 |
| Case 85 | 6 | 103,945,668 | 106,369,045 | 1 | 1 | 2 | 0 |
| Case 85 | 6 | 106,371,088 | 107,505,241 | 1 | 0 | 1 | 0 |
| Case 85 | 6 | 107,506,631 | 108,121,953 | 1 | 1 | 2 | 0 |
| Case 85 | 6 | 108,127,875 | 109,037,698 | 1 | 0 | 1 | 0 |
| Case 85 | 6 | 109,038,738 | 110,768,128 | 1 | 1 | 2 | 0 |
| Case 85 | 6 | 110,768,155 | 111,558,989 | 1 | 0 | 1 | 0 |
| Case 85 | 6 | 111,560,946 | 134,413,537 | 1 | 1 | 2 | 0 |
| Case 85 | 6 | 134,416,205 | 134,831,205 | 1 | 0 | 1 | 0 |
| Case 85 | 6 | 134,831,486 | 138,900,935 | 1 | 1 | 2 | 0 |
| Case 85 | 6 | 138,902,869 | 141,656,138 | 1 | 0 | 1 | 0 |
| Case 85 | 6 | 141,667,778 | 148,519,573 | 1 | 1 | 2 | 0 |
| Case 85 | 6 | 148,526,689 | 150,211,100 | 1 | 0 | 1 | 0 |
| Case 85 | 6 | 150,211,123 | 151,765,296 | 1 | 1 | 2 | 0 |
| Case 85 | 6 | 151,768,495 | 152,006,011 | 1 | 0 | 1 | 0 |
| Case 85 | 6 | 152,006,178 | 158,094,302 | 1 | 1 | 2 | 0 |
| Case 85 | 6 | 158,096,328 | 159,401,898 | 1 | 0 | 1 | 0 |
| Case 85 | 6 | 159,403,554 | 160,858,175 | 1 | 1 | 2 | 0 |
| Case 85 | 6 | 160,858,188 | 161,551,439 | 1 | 0 | 1 | 0 |
| Case 85 | 6 | 161,553,837 | 169,888,764 | 1 | 1 | 2 | 0 |
| Case 85 | 6 | 169,898,317 | 170,980,171 | 1 | 0 | 1 | 0 |
| Case 85 | 7 | 44,935      | 44,935      | 2 | 0 | 2 | 1 |
| Case 85 | 7 | 46,239      | 68,920      | 4 | 0 | 4 | 1 |
| Case 85 | 7 | 83,185      | 7,178,545   | 1 | 1 | 2 | 0 |
| Case 85 | 7 | 7,185,752   | 7,646,720   | 2 | 1 | 3 | 0 |
| Case 85 | 7 | 7,653,628   | 57,481,104  | 1 | 1 | 2 | 0 |
| Case 85 | 7 | 57,488,782  | 58,019,061  | 1 | 0 | 1 | 0 |
| Case 85 | 7 | 61,056,053  | 62,677,044  | 1 | 0 | 1 | 0 |



|         |    |             |             |   |   |   |   |
|---------|----|-------------|-------------|---|---|---|---|
| Case 85 | 7  | 62,689,447  | 100,674,899 | 1 | 1 | 2 | 0 |
| Case 85 | 7  | 100,674,978 | 100,686,356 | 1 | 0 | 1 | 0 |
| Case 85 | 7  | 100,686,491 | 159,119,486 | 1 | 1 | 2 | 0 |
| Case 85 | 8  | 164,984     | 43,791,691  | 1 | 1 | 2 | 0 |
| Case 85 | 8  | 46,886,735  | 49,812,201  | 1 | 1 | 2 | 0 |
| Case 85 | 8  | 49,816,187  | 54,203,739  | 2 | 1 | 3 | 0 |
| Case 85 | 8  | 54,224,120  | 57,216,066  | 1 | 1 | 2 | 0 |
| Case 85 | 8  | 57,218,190  | 73,890,425  | 2 | 1 | 3 | 0 |
| Case 85 | 8  | 73,893,239  | 75,021,897  | 1 | 1 | 2 | 0 |
| Case 85 | 8  | 75,024,816  | 95,461,946  | 2 | 1 | 3 | 0 |
| Case 85 | 8  | 95,470,511  | 96,200,507  | 1 | 1 | 2 | 0 |
| Case 85 | 8  | 96,202,284  | 101,533,868 | 2 | 1 | 3 | 0 |
| Case 85 | 8  | 101,534,986 | 101,937,374 | 1 | 1 | 2 | 0 |
| Case 85 | 8  | 101,937,455 | 146,293,414 | 2 | 1 | 3 | 0 |
| Case 85 | 9  | 46,587      | 307,266     | 1 | 1 | 2 | 0 |
| Case 85 | 9  | 311,966     | 953,280     | 1 | 0 | 1 | 0 |
| Case 85 | 9  | 953,465     | 4,362,167   | 1 | 1 | 2 | 0 |
| Case 85 | 9  | 4,362,624   | 7,030,268   | 1 | 0 | 1 | 0 |
| Case 85 | 9  | 7,032,644   | 8,518,395   | 1 | 1 | 2 | 0 |
| Case 85 | 9  | 8,520,287   | 8,845,598   | 1 | 0 | 1 | 0 |
| Case 85 | 9  | 8,845,911   | 9,187,539   | 1 | 1 | 2 | 0 |
| Case 85 | 9  | 9,188,865   | 12,092,895  | 1 | 0 | 1 | 0 |
| Case 85 | 9  | 12,093,072  | 15,290,012  | 1 | 1 | 2 | 0 |
| Case 85 | 9  | 15,290,174  | 15,823,667  | 1 | 0 | 1 | 0 |
| Case 85 | 9  | 15,830,506  | 16,766,118  | 1 | 1 | 2 | 0 |
| Case 85 | 9  | 16,768,707  | 17,524,038  | 1 | 0 | 1 | 0 |
| Case 85 | 9  | 17,531,968  | 18,941,748  | 1 | 1 | 2 | 0 |
| Case 85 | 9  | 18,941,775  | 19,479,536  | 1 | 0 | 1 | 0 |
| Case 85 | 9  | 19,484,869  | 20,337,131  | 1 | 1 | 2 | 0 |
| Case 85 | 9  | 20,341,702  | 27,792,965  | 1 | 0 | 1 | 0 |
| Case 85 | 9  | 27,800,007  | 28,215,883  | 1 | 1 | 2 | 0 |
| Case 85 | 9  | 28,216,153  | 31,405,730  | 1 | 0 | 1 | 0 |
| Case 85 | 9  | 31,408,125  | 33,487,023  | 1 | 1 | 2 | 0 |
| Case 85 | 9  | 33,506,670  | 34,256,347  | 1 | 0 | 1 | 0 |
| Case 85 | 9  | 34,256,371  | 35,993,376  | 1 | 1 | 2 | 0 |
| Case 85 | 9  | 35,994,554  | 36,709,347  | 1 | 0 | 1 | 0 |
| Case 85 | 9  | 36,718,171  | 46,944,322  | 1 | 1 | 2 | 0 |
| Case 85 | 9  | 65,629,772  | 74,414,358  | 1 | 1 | 2 | 0 |
| Case 85 | 9  | 74,427,419  | 77,684,860  | 1 | 0 | 1 | 0 |
| Case 85 | 9  | 77,684,899  | 79,469,096  | 1 | 1 | 2 | 0 |
| Case 85 | 9  | 79,469,334  | 80,030,829  | 1 | 0 | 1 | 0 |
| Case 85 | 9  | 80,031,144  | 83,759,957  | 1 | 1 | 2 | 0 |
| Case 85 | 9  | 83,763,114  | 84,763,025  | 1 | 0 | 1 | 0 |
| Case 85 | 9  | 84,765,612  | 90,503,563  | 1 | 1 | 2 | 0 |
| Case 85 | 9  | 90,503,734  | 91,109,302  | 1 | 0 | 1 | 0 |
| Case 85 | 9  | 91,109,498  | 95,041,636  | 1 | 1 | 2 | 0 |
| Case 85 | 9  | 95,043,108  | 95,919,865  | 1 | 0 | 1 | 0 |
| Case 85 | 9  | 95,930,334  | 99,007,634  | 1 | 1 | 2 | 0 |
| Case 85 | 9  | 99,012,277  | 99,824,697  | 1 | 0 | 1 | 0 |
| Case 85 | 9  | 99,832,156  | 99,946,041  | 1 | 1 | 2 | 0 |
| Case 85 | 9  | 99,957,548  | 101,778,265 | 3 | 0 | 3 | 1 |
| Case 85 | 9  | 101,778,272 | 103,340,628 | 2 | 0 | 2 | 1 |
| Case 85 | 9  | 103,340,658 | 105,376,158 | 3 | 0 | 3 | 1 |
| Case 85 | 9  | 105,376,813 | 105,955,511 | 2 | 0 | 2 | 1 |
| Case 85 | 9  | 105,964,224 | 130,909,329 | 3 | 0 | 3 | 1 |
| Case 85 | 9  | 130,910,687 | 132,840,968 | 2 | 0 | 2 | 1 |
| Case 85 | 9  | 132,849,126 | 139,412,205 | 3 | 0 | 3 | 1 |
| Case 85 | 9  | 139,412,256 | 141,066,491 | 2 | 0 | 2 | 1 |
| Case 85 | 10 | 98,087      | 39,097,912  | 1 | 1 | 2 | 0 |
| Case 85 | 10 | 42,436,301  | 73,846,743  | 1 | 1 | 2 | 0 |
| Case 85 | 10 | 73,848,075  | 75,148,080  | 1 | 0 | 1 | 0 |

|         |    |             |             |   |   |   |   |
|---------|----|-------------|-------------|---|---|---|---|
| Case 85 | 10 | 75,148,090  | 135,477,883 | 1 | 1 | 2 | 0 |
| Case 85 | 11 | 193,146     | 433,904     | 1 | 1 | 2 | 0 |
| Case 85 | 11 | 434,095     | 1,015,021   | 1 | 0 | 1 | 0 |
| Case 85 | 11 | 1,015,786   | 3,625,720   | 1 | 1 | 2 | 0 |
| Case 85 | 11 | 3,626,177   | 3,900,133   | 1 | 0 | 1 | 0 |
| Case 85 | 11 | 3,900,915   | 5,757,930   | 1 | 1 | 2 | 0 |
| Case 85 | 11 | 5,758,002   | 5,969,073   | 2 | 1 | 3 | 0 |
| Case 85 | 11 | 5,969,185   | 8,338,357   | 3 | 1 | 4 | 0 |
| Case 85 | 11 | 8,339,628   | 10,510,272  | 2 | 1 | 3 | 0 |
| Case 85 | 11 | 10,511,142  | 10,538,816  | 7 | 0 | 7 | 1 |
| Case 85 | 11 | 10,540,331  | 10,558,777  | 1 | 1 | 2 | 0 |
| Case 85 | 11 | 10,563,062  | 16,389,594  | 2 | 1 | 3 | 0 |
| Case 85 | 11 | 16,394,068  | 24,816,638  | 3 | 1 | 4 | 0 |
| Case 85 | 11 | 24,817,709  | 37,561,201  | 2 | 1 | 3 | 0 |
| Case 85 | 11 | 37,564,368  | 50,381,750  | 1 | 1 | 2 | 0 |
| Case 85 | 11 | 50,417,549  | 51,419,389  | 1 | 0 | 1 | 0 |
| Case 85 | 11 | 51,440,610  | 51,591,253  | 1 | 1 | 2 | 0 |
| Case 85 | 11 | 54,794,237  | 74,105,105  | 1 | 1 | 2 | 0 |
| Case 85 | 11 | 74,109,166  | 76,922,359  | 2 | 1 | 3 | 0 |
| Case 85 | 11 | 76,922,875  | 77,920,577  | 1 | 1 | 2 | 0 |
| Case 85 | 11 | 77,920,657  | 87,748,710  | 2 | 1 | 3 | 0 |
| Case 85 | 11 | 87,753,168  | 112,402,954 | 2 | 0 | 2 | 1 |
| Case 85 | 11 | 112,417,074 | 113,149,642 | 2 | 1 | 3 | 0 |
| Case 85 | 11 | 113,150,050 | 122,971,458 | 2 | 0 | 2 | 1 |
| Case 85 | 11 | 122,975,915 | 134,934,063 | 2 | 1 | 3 | 0 |
| Case 85 | 12 | 191,619     | 632,922     | 1 | 1 | 2 | 0 |
| Case 85 | 12 | 634,632     | 1,601,024   | 1 | 0 | 1 | 0 |
| Case 85 | 12 | 1,601,561   | 7,624,073   | 1 | 1 | 2 | 0 |
| Case 85 | 12 | 7,630,833   | 10,742,415  | 1 | 0 | 1 | 0 |
| Case 85 | 12 | 10,743,718  | 11,149,658  | 1 | 1 | 2 | 0 |
| Case 85 | 12 | 11,149,667  | 11,600,320  | 1 | 0 | 1 | 0 |
| Case 85 | 12 | 11,600,364  | 12,245,254  | 1 | 1 | 2 | 0 |
| Case 85 | 12 | 12,247,594  | 12,829,914  | 1 | 0 | 1 | 0 |
| Case 85 | 12 | 12,834,806  | 14,167,216  | 1 | 1 | 2 | 0 |
| Case 85 | 12 | 14,170,627  | 14,770,729  | 1 | 0 | 1 | 0 |
| Case 85 | 12 | 14,773,933  | 17,502,531  | 1 | 1 | 2 | 0 |
| Case 85 | 12 | 17,502,985  | 20,226,881  | 1 | 0 | 1 | 0 |
| Case 85 | 12 | 20,230,639  | 20,834,635  | 1 | 1 | 2 | 0 |
| Case 85 | 12 | 20,839,851  | 22,287,841  | 1 | 0 | 1 | 0 |
| Case 85 | 12 | 22,289,304  | 24,967,212  | 1 | 1 | 2 | 0 |
| Case 85 | 12 | 24,967,470  | 25,699,523  | 1 | 0 | 1 | 0 |
| Case 85 | 12 | 25,701,632  | 29,181,450  | 1 | 1 | 2 | 0 |
| Case 85 | 12 | 29,185,316  | 29,661,363  | 1 | 0 | 1 | 0 |
| Case 85 | 12 | 29,661,376  | 31,402,690  | 1 | 1 | 2 | 0 |
| Case 85 | 12 | 31,406,809  | 32,935,752  | 1 | 0 | 1 | 0 |
| Case 85 | 12 | 32,936,836  | 34,106,380  | 1 | 1 | 2 | 0 |
| Case 85 | 12 | 34,117,408  | 34,294,699  | 2 | 0 | 2 | 1 |
| Case 85 | 12 | 34,306,859  | 34,853,011  | 0 | 0 | 0 | 0 |
| Case 85 | 12 | 37,876,400  | 38,708,937  | 0 | 0 | 0 | 0 |
| Case 85 | 12 | 38,710,459  | 42,183,271  | 1 | 1 | 2 | 0 |
| Case 85 | 12 | 42,183,432  | 43,064,657  | 1 | 0 | 1 | 0 |
| Case 85 | 12 | 43,066,023  | 44,060,325  | 1 | 1 | 2 | 0 |
| Case 85 | 12 | 44,064,020  | 46,339,033  | 1 | 0 | 1 | 0 |
| Case 85 | 12 | 46,344,979  | 48,836,889  | 1 | 1 | 2 | 0 |
| Case 85 | 12 | 48,838,993  | 51,631,016  | 1 | 0 | 1 | 0 |
| Case 85 | 12 | 51,636,174  | 53,670,563  | 1 | 1 | 2 | 0 |
| Case 85 | 12 | 53,671,005  | 54,030,586  | 1 | 0 | 1 | 0 |
| Case 85 | 12 | 54,041,192  | 56,121,099  | 1 | 1 | 2 | 0 |
| Case 85 | 12 | 56,124,332  | 57,257,244  | 1 | 0 | 1 | 0 |
| Case 85 | 12 | 57,265,375  | 59,871,710  | 1 | 1 | 2 | 0 |
| Case 85 | 12 | 59,888,294  | 62,996,061  | 1 | 0 | 1 | 0 |

|         |    |             |             |   |   |   |   |
|---------|----|-------------|-------------|---|---|---|---|
| Case 85 | 12 | 62,996,793  | 63,866,927  | 1 | 1 | 2 | 0 |
| Case 85 | 12 | 63,870,969  | 65,026,115  | 1 | 0 | 1 | 0 |
| Case 85 | 12 | 65,026,214  | 65,958,507  | 1 | 1 | 2 | 0 |
| Case 85 | 12 | 65,962,636  | 66,913,729  | 1 | 0 | 1 | 0 |
| Case 85 | 12 | 66,913,919  | 68,803,691  | 1 | 1 | 2 | 0 |
| Case 85 | 12 | 68,804,230  | 70,003,859  | 1 | 0 | 1 | 0 |
| Case 85 | 12 | 70,003,922  | 71,588,592  | 1 | 1 | 2 | 0 |
| Case 85 | 12 | 71,589,246  | 72,219,336  | 1 | 0 | 1 | 0 |
| Case 85 | 12 | 72,222,376  | 73,390,084  | 1 | 1 | 2 | 0 |
| Case 85 | 12 | 73,392,439  | 74,290,543  | 1 | 0 | 1 | 0 |
| Case 85 | 12 | 74,305,369  | 75,728,560  | 1 | 1 | 2 | 0 |
| Case 85 | 12 | 75,728,612  | 133,810,935 | 2 | 0 | 2 | 1 |
| Case 85 | 13 | 19,058,717  | 26,867,143  | 1 | 1 | 2 | 0 |
| Case 85 | 13 | 26,884,520  | 32,791,621  | 2 | 1 | 3 | 0 |
| Case 85 | 13 | 32,792,138  | 33,522,655  | 1 | 1 | 2 | 0 |
| Case 85 | 13 | 33,524,448  | 45,222,314  | 2 | 1 | 3 | 0 |
| Case 85 | 13 | 45,225,531  | 46,482,119  | 1 | 1 | 2 | 0 |
| Case 85 | 13 | 46,482,949  | 95,757,439  | 2 | 1 | 3 | 0 |
| Case 85 | 13 | 95,757,943  | 99,907,224  | 3 | 1 | 4 | 0 |
| Case 85 | 13 | 99,907,240  | 101,458,691 | 1 | 1 | 2 | 0 |
| Case 85 | 13 | 101,461,657 | 108,666,901 | 2 | 1 | 3 | 0 |
| Case 85 | 13 | 108,667,994 | 109,627,586 | 1 | 1 | 2 | 0 |
| Case 85 | 13 | 109,637,623 | 112,723,111 | 2 | 1 | 3 | 0 |
| Case 85 | 13 | 112,729,543 | 115,103,529 | 1 | 1 | 2 | 0 |
| Case 85 | 14 | 19,280,733  | 19,964,076  | 1 | 1 | 2 | 0 |
| Case 85 | 14 | 20,213,937  | 20,723,695  | 1 | 0 | 1 | 0 |
| Case 85 | 14 | 20,724,318  | 23,081,528  | 1 | 1 | 2 | 0 |
| Case 85 | 14 | 23,081,926  | 23,519,131  | 1 | 0 | 1 | 0 |
| Case 85 | 14 | 23,519,975  | 26,945,366  | 1 | 1 | 2 | 0 |
| Case 85 | 14 | 26,959,322  | 30,029,252  | 1 | 0 | 1 | 0 |
| Case 85 | 14 | 30,032,637  | 31,245,907  | 1 | 1 | 2 | 0 |
| Case 85 | 14 | 31,245,933  | 32,332,377  | 1 | 0 | 1 | 0 |
| Case 85 | 14 | 32,334,616  | 34,794,727  | 1 | 1 | 2 | 0 |
| Case 85 | 14 | 34,797,315  | 36,531,323  | 1 | 0 | 1 | 0 |
| Case 85 | 14 | 36,534,182  | 39,510,040  | 1 | 1 | 2 | 0 |
| Case 85 | 14 | 39,512,070  | 46,079,277  | 1 | 0 | 1 | 0 |
| Case 85 | 14 | 46,081,072  | 49,957,271  | 1 | 1 | 2 | 0 |
| Case 85 | 14 | 49,957,353  | 51,197,147  | 1 | 0 | 1 | 0 |
| Case 85 | 14 | 51,198,815  | 52,887,962  | 1 | 1 | 2 | 0 |
| Case 85 | 14 | 52,888,789  | 53,529,754  | 1 | 0 | 1 | 0 |
| Case 85 | 14 | 53,558,575  | 55,332,799  | 1 | 1 | 2 | 0 |
| Case 85 | 14 | 55,343,879  | 56,137,504  | 1 | 0 | 1 | 0 |
| Case 85 | 14 | 56,139,686  | 58,505,662  | 1 | 1 | 2 | 0 |
| Case 85 | 14 | 58,507,598  | 59,108,427  | 1 | 0 | 1 | 0 |
| Case 85 | 14 | 59,108,678  | 63,241,005  | 1 | 1 | 2 | 0 |
| Case 85 | 14 | 63,246,495  | 65,055,892  | 1 | 0 | 1 | 0 |
| Case 85 | 14 | 65,055,953  | 65,308,862  | 1 | 1 | 2 | 0 |
| Case 85 | 14 | 65,310,367  | 68,159,269  | 1 | 0 | 1 | 0 |
| Case 85 | 14 | 68,163,157  | 73,459,917  | 1 | 1 | 2 | 0 |
| Case 85 | 14 | 73,459,927  | 76,199,701  | 1 | 0 | 1 | 0 |
| Case 85 | 14 | 76,200,366  | 86,414,505  | 1 | 1 | 2 | 0 |
| Case 85 | 14 | 86,415,702  | 87,558,815  | 1 | 0 | 1 | 0 |
| Case 85 | 14 | 87,560,170  | 90,208,263  | 1 | 1 | 2 | 0 |
| Case 85 | 14 | 90,209,466  | 92,666,291  | 1 | 0 | 1 | 0 |
| Case 85 | 14 | 92,668,250  | 93,171,025  | 1 | 1 | 2 | 0 |
| Case 85 | 14 | 93,171,033  | 94,087,775  | 1 | 0 | 1 | 0 |
| Case 85 | 14 | 94,088,020  | 95,910,923  | 1 | 1 | 2 | 0 |
| Case 85 | 14 | 95,911,060  | 96,124,517  | 1 | 0 | 1 | 0 |
| Case 85 | 14 | 96,125,649  | 98,430,382  | 1 | 1 | 2 | 0 |
| Case 85 | 14 | 98,430,427  | 107,287,663 | 2 | 0 | 2 | 1 |
| Case 85 | 15 | 20,034,919  | 102,461,162 | 1 | 1 | 2 | 0 |

|         |    |            |            |   |   |   |   |
|---------|----|------------|------------|---|---|---|---|
| Case 85 | 16 | 88,165     | 352,736    | 1 | 1 | 2 | 0 |
| Case 85 | 16 | 354,314    | 2,781,843  | 1 | 0 | 1 | 0 |
| Case 85 | 16 | 2,785,158  | 3,165,900  | 1 | 1 | 2 | 0 |
| Case 85 | 16 | 3,166,467  | 4,828,087  | 1 | 0 | 1 | 0 |
| Case 85 | 16 | 4,828,473  | 7,131,614  | 1 | 1 | 2 | 0 |
| Case 85 | 16 | 7,138,711  | 10,862,707 | 2 | 1 | 3 | 0 |
| Case 85 | 16 | 10,863,414 | 13,323,620 | 1 | 1 | 2 | 0 |
| Case 85 | 16 | 13,330,774 | 14,566,432 | 2 | 1 | 3 | 0 |
| Case 85 | 16 | 14,576,672 | 34,416,833 | 1 | 1 | 2 | 0 |
| Case 85 | 16 | 34,516,075 | 35,285,582 | 1 | 0 | 1 | 0 |
| Case 85 | 16 | 46,450,037 | 47,684,830 | 1 | 0 | 1 | 0 |
| Case 85 | 16 | 47,691,209 | 49,980,751 | 1 | 1 | 2 | 0 |
| Case 85 | 16 | 49,984,353 | 50,450,040 | 1 | 0 | 1 | 0 |
| Case 85 | 16 | 50,451,650 | 52,833,422 | 1 | 1 | 2 | 0 |
| Case 85 | 16 | 52,840,949 | 53,884,113 | 1 | 0 | 1 | 0 |
| Case 85 | 16 | 53,884,404 | 56,175,242 | 1 | 1 | 2 | 0 |
| Case 85 | 16 | 56,178,062 | 57,921,902 | 1 | 0 | 1 | 0 |
| Case 85 | 16 | 57,921,917 | 58,166,730 | 1 | 1 | 2 | 0 |
| Case 85 | 16 | 58,167,510 | 60,582,514 | 1 | 0 | 1 | 0 |
| Case 85 | 16 | 60,591,578 | 66,977,434 | 1 | 1 | 2 | 0 |
| Case 85 | 16 | 66,977,896 | 68,248,607 | 1 | 0 | 1 | 0 |
| Case 85 | 16 | 68,255,187 | 68,524,308 | 1 | 1 | 2 | 0 |
| Case 85 | 16 | 68,536,105 | 70,560,603 | 1 | 0 | 1 | 0 |
| Case 85 | 16 | 70,563,087 | 71,163,613 | 1 | 1 | 2 | 0 |
| Case 85 | 16 | 71,171,142 | 72,035,359 | 1 | 0 | 1 | 0 |
| Case 85 | 16 | 72,038,363 | 74,075,623 | 1 | 1 | 2 | 0 |
| Case 85 | 16 | 74,076,647 | 76,354,827 | 1 | 0 | 1 | 0 |
| Case 85 | 16 | 76,364,177 | 84,094,363 | 1 | 1 | 2 | 0 |
| Case 85 | 16 | 84,094,417 | 84,230,500 | 1 | 0 | 1 | 0 |
| Case 85 | 16 | 84,231,114 | 88,931,970 | 1 | 1 | 2 | 0 |
| Case 85 | 16 | 88,932,012 | 89,838,111 | 1 | 0 | 1 | 0 |
| Case 85 | 16 | 89,838,136 | 90,274,695 | 1 | 1 | 2 | 0 |
| Case 85 | 17 | 11,885     | 62,526     | 1 | 1 | 2 | 0 |
| Case 85 | 17 | 62,646     | 2,822,291  | 1 | 0 | 1 | 0 |
| Case 85 | 17 | 2,825,538  | 2,939,981  | 1 | 1 | 2 | 0 |
| Case 85 | 17 | 2,940,759  | 3,248,471  | 1 | 0 | 1 | 0 |
| Case 85 | 17 | 3,269,345  | 3,966,243  | 1 | 1 | 2 | 0 |
| Case 85 | 17 | 3,967,797  | 4,714,116  | 1 | 0 | 1 | 0 |
| Case 85 | 17 | 4,714,215  | 4,946,325  | 1 | 1 | 2 | 0 |
| Case 85 | 17 | 4,955,206  | 5,641,508  | 1 | 0 | 1 | 0 |
| Case 85 | 17 | 5,645,968  | 8,046,753  | 1 | 1 | 2 | 0 |
| Case 85 | 17 | 8,046,768  | 9,791,286  | 1 | 0 | 1 | 0 |
| Case 85 | 17 | 9,791,375  | 10,161,919 | 1 | 1 | 2 | 0 |
| Case 85 | 17 | 10,163,569 | 10,536,949 | 1 | 0 | 1 | 0 |
| Case 85 | 17 | 10,539,089 | 12,997,946 | 1 | 1 | 2 | 0 |
| Case 85 | 17 | 12,999,427 | 13,795,631 | 1 | 0 | 1 | 0 |
| Case 85 | 17 | 13,798,629 | 15,609,802 | 1 | 1 | 2 | 0 |
| Case 85 | 17 | 15,610,167 | 16,531,139 | 1 | 0 | 1 | 0 |
| Case 85 | 17 | 16,537,207 | 18,916,330 | 1 | 1 | 2 | 0 |
| Case 85 | 17 | 18,916,779 | 22,242,355 | 1 | 0 | 1 | 0 |
| Case 85 | 17 | 25,268,142 | 25,750,970 | 1 | 0 | 1 | 0 |
| Case 85 | 17 | 25,765,540 | 27,434,393 | 1 | 1 | 2 | 0 |
| Case 85 | 17 | 27,436,606 | 31,094,760 | 1 | 0 | 1 | 0 |
| Case 85 | 17 | 31,099,821 | 34,406,906 | 1 | 1 | 2 | 0 |
| Case 85 | 17 | 34,414,914 | 34,443,811 | 2 | 1 | 3 | 0 |
| Case 85 | 17 | 34,445,325 | 34,476,396 | 7 | 0 | 7 | 1 |
| Case 85 | 17 | 34,597,521 | 36,195,934 | 1 | 0 | 1 | 0 |
| Case 85 | 17 | 36,206,318 | 57,637,803 | 1 | 1 | 2 | 0 |
| Case 85 | 17 | 57,638,015 | 59,022,395 | 1 | 0 | 1 | 0 |
| Case 85 | 17 | 59,034,422 | 76,482,395 | 1 | 1 | 2 | 0 |
| Case 85 | 17 | 76,484,948 | 78,051,447 | 2 | 1 | 3 | 0 |

|         |    |            |            |   |   |   |   |
|---------|----|------------|------------|---|---|---|---|
| Case 85 | 17 | 78,054,102 | 78,098,477 | 1 | 1 | 2 | 0 |
| Case 85 | 17 | 78,098,490 | 78,184,601 | 1 | 0 | 1 | 0 |
| Case 85 | 17 | 78,184,644 | 78,353,478 | 1 | 1 | 2 | 0 |
| Case 85 | 17 | 78,354,661 | 79,970,157 | 2 | 1 | 3 | 0 |
| Case 85 | 17 | 79,971,065 | 80,554,346 | 1 | 1 | 2 | 0 |
| Case 85 | 17 | 80,559,167 | 81,060,040 | 2 | 1 | 3 | 0 |
| Case 85 | 18 | 87,505     | 15,375,878 | 1 | 1 | 2 | 0 |
| Case 85 | 18 | 18,520,354 | 56,219,590 | 1 | 1 | 2 | 0 |
| Case 85 | 18 | 56,221,422 | 56,796,607 | 1 | 0 | 1 | 0 |
| Case 85 | 18 | 56,798,344 | 59,711,310 | 1 | 1 | 2 | 0 |
| Case 85 | 18 | 59,713,102 | 60,064,536 | 1 | 0 | 1 | 0 |
| Case 85 | 18 | 60,065,821 | 60,878,629 | 1 | 1 | 2 | 0 |
| Case 85 | 18 | 60,878,883 | 61,097,732 | 1 | 0 | 1 | 0 |
| Case 85 | 18 | 61,100,693 | 62,547,228 | 1 | 1 | 2 | 0 |
| Case 85 | 18 | 62,549,673 | 64,138,003 | 1 | 0 | 1 | 0 |
| Case 85 | 18 | 64,142,167 | 65,256,094 | 1 | 1 | 2 | 0 |
| Case 85 | 18 | 65,256,173 | 65,532,262 | 1 | 0 | 1 | 0 |
| Case 85 | 18 | 65,537,177 | 68,735,006 | 1 | 1 | 2 | 0 |
| Case 85 | 18 | 68,740,189 | 69,663,285 | 1 | 0 | 1 | 0 |
| Case 85 | 18 | 69,665,299 | 70,436,479 | 1 | 1 | 2 | 0 |
| Case 85 | 18 | 70,442,068 | 71,059,884 | 1 | 0 | 1 | 0 |
| Case 85 | 18 | 71,061,875 | 78,015,180 | 1 | 1 | 2 | 0 |
| Case 85 | 19 | 260,912    | 327,892    | 1 | 1 | 2 | 0 |
| Case 85 | 19 | 327,920    | 3,009,220  | 1 | 0 | 1 | 0 |
| Case 85 | 19 | 3,009,788  | 3,488,180  | 1 | 1 | 2 | 0 |
| Case 85 | 19 | 3,488,287  | 5,915,026  | 1 | 0 | 1 | 0 |
| Case 85 | 19 | 5,915,098  | 6,552,445  | 1 | 1 | 2 | 0 |
| Case 85 | 19 | 6,555,363  | 11,819,193 | 1 | 0 | 1 | 0 |
| Case 85 | 19 | 11,828,410 | 12,721,401 | 0 | 0 | 0 | 0 |
| Case 85 | 19 | 12,721,600 | 12,726,769 | 1 | 1 | 2 | 0 |
| Case 85 | 19 | 12,731,874 | 15,852,223 | 1 | 0 | 1 | 0 |
| Case 85 | 19 | 15,852,242 | 16,025,176 | 1 | 1 | 2 | 0 |
| Case 85 | 19 | 16,025,182 | 24,629,285 | 1 | 0 | 1 | 0 |
| Case 85 | 19 | 27,732,159 | 28,319,922 | 1 | 0 | 1 | 0 |
| Case 85 | 19 | 28,327,584 | 36,727,365 | 1 | 1 | 2 | 0 |
| Case 85 | 19 | 36,731,424 | 38,380,778 | 1 | 0 | 1 | 0 |
| Case 85 | 19 | 38,383,767 | 40,433,893 | 1 | 1 | 2 | 0 |
| Case 85 | 19 | 40,440,064 | 40,720,381 | 1 | 0 | 1 | 0 |
| Case 85 | 19 | 40,720,883 | 44,277,037 | 1 | 1 | 2 | 0 |
| Case 85 | 19 | 44,278,508 | 44,833,855 | 1 | 0 | 1 | 0 |
| Case 85 | 19 | 44,833,888 | 52,938,439 | 1 | 1 | 2 | 0 |
| Case 85 | 19 | 52,941,073 | 53,669,492 | 1 | 0 | 1 | 0 |
| Case 85 | 19 | 53,675,721 | 54,676,763 | 1 | 1 | 2 | 0 |
| Case 85 | 19 | 54,677,167 | 54,722,700 | 2 | 1 | 3 | 0 |
| Case 85 | 19 | 54,731,679 | 54,743,217 | 7 | 0 | 7 | 1 |
| Case 85 | 19 | 54,749,011 | 58,018,773 | 1 | 1 | 2 | 0 |
| Case 85 | 19 | 58,018,790 | 58,491,149 | 1 | 0 | 1 | 0 |
| Case 85 | 19 | 58,491,461 | 58,992,029 | 1 | 1 | 2 | 0 |
| Case 85 | 19 | 58,992,063 | 59,097,160 | 2 | 1 | 3 | 0 |
| Case 85 | 20 | 63,244     | 13,280,042 | 1 | 1 | 2 | 0 |
| Case 85 | 20 | 13,281,503 | 14,992,542 | 1 | 0 | 1 | 0 |
| Case 85 | 20 | 14,995,343 | 15,143,806 | 2 | 0 | 2 | 1 |
| Case 85 | 20 | 15,145,060 | 16,091,715 | 2 | 1 | 3 | 0 |
| Case 85 | 20 | 16,092,616 | 16,554,546 | 1 | 1 | 2 | 0 |
| Case 85 | 20 | 16,555,032 | 26,293,985 | 2 | 1 | 3 | 0 |
| Case 85 | 20 | 29,425,357 | 31,890,184 | 2 | 1 | 3 | 0 |
| Case 85 | 20 | 31,890,201 | 32,295,541 | 2 | 0 | 2 | 1 |
| Case 85 | 20 | 32,295,568 | 34,505,054 | 1 | 1 | 2 | 0 |
| Case 85 | 20 | 34,505,413 | 62,948,788 | 2 | 1 | 3 | 0 |
| Case 85 | 21 | 10,827,533 | 10,971,337 | 1 | 1 | 2 | 0 |
| Case 85 | 21 | 14,368,320 | 19,068,606 | 1 | 1 | 2 | 0 |

|         |    |            |            |   |   |   |   |
|---------|----|------------|------------|---|---|---|---|
| Case 85 | 21 | 19,070,558 | 20,607,065 | 2 | 1 | 3 | 0 |
| Case 85 | 21 | 20,618,024 | 21,386,179 | 4 | 1 | 5 | 0 |
| Case 85 | 21 | 21,386,251 | 24,976,138 | 1 | 0 | 1 | 0 |
| Case 85 | 21 | 24,979,322 | 48,100,155 | 1 | 1 | 2 | 0 |
| Case 85 | 22 | 16,114,244 | 17,493,792 | 1 | 1 | 2 | 0 |
| Case 85 | 22 | 17,494,547 | 18,331,118 | 1 | 0 | 1 | 0 |
| Case 85 | 22 | 18,337,880 | 19,188,971 | 1 | 1 | 2 | 0 |
| Case 85 | 22 | 19,195,680 | 20,103,876 | 1 | 0 | 1 | 0 |
| Case 85 | 22 | 20,103,915 | 21,353,328 | 1 | 1 | 2 | 0 |
| Case 85 | 22 | 21,353,925 | 22,599,705 | 1 | 0 | 1 | 0 |
| Case 85 | 22 | 22,599,764 | 30,244,719 | 1 | 1 | 2 | 0 |
| Case 85 | 22 | 30,261,219 | 32,894,401 | 1 | 0 | 1 | 0 |
| Case 85 | 22 | 32,894,453 | 35,893,156 | 1 | 1 | 2 | 0 |
| Case 85 | 22 | 35,897,233 | 36,661,674 | 1 | 0 | 1 | 0 |
| Case 85 | 22 | 36,661,691 | 38,199,950 | 1 | 1 | 2 | 0 |
| Case 85 | 22 | 38,200,124 | 39,493,294 | 1 | 0 | 1 | 0 |
| Case 85 | 22 | 39,496,336 | 40,452,119 | 1 | 1 | 2 | 0 |
| Case 85 | 22 | 40,454,069 | 43,462,451 | 1 | 0 | 1 | 0 |
| Case 85 | 22 | 43,464,416 | 46,541,227 | 1 | 1 | 2 | 0 |
| Case 85 | 22 | 46,545,945 | 46,765,593 | 1 | 0 | 1 | 0 |
| Case 85 | 22 | 46,765,995 | 50,211,295 | 1 | 1 | 2 | 0 |
| Case 85 | 22 | 50,216,639 | 50,721,845 | 1 | 0 | 1 | 0 |
| Case 85 | 22 | 50,722,049 | 51,195,728 | 1 | 1 | 2 | 0 |
| Case 87 | 1  | 82,154     | 1,567,206  | 4 | 0 | 4 | 1 |
| Case 87 | 1  | 1,572,310  | 1,572,310  | 3 | 0 | 3 | 1 |
| Case 87 | 1  | 1,597,351  | 1,647,686  | 0 | 0 | 0 | 0 |
| Case 87 | 1  | 1,663,831  | 1,663,944  | 2 | 0 | 2 | 1 |
| Case 87 | 1  | 1,664,019  | 48,957,540 | 4 | 0 | 4 | 1 |
| Case 87 | 1  | 48,959,912 | 49,527,451 | 3 | 0 | 3 | 1 |
| Case 87 | 1  | 49,528,319 | 50,642,851 | 2 | 0 | 2 | 1 |
| Case 87 | 1  | 50,644,891 | 50,945,526 | 3 | 0 | 3 | 1 |
| Case 87 | 1  | 50,966,897 | 52,324,228 | 2 | 0 | 2 | 1 |
| Case 87 | 1  | 52,336,137 | 52,521,798 | 3 | 0 | 3 | 1 |
| Case 87 | 1  | 52,525,637 | 52,798,576 | 2 | 0 | 2 | 1 |
| Case 87 | 1  | 52,803,503 | 52,902,540 | 3 | 0 | 3 | 1 |
| Case 87 | 1  | 52,902,547 | 53,039,603 | 2 | 0 | 2 | 1 |
| Case 87 | 1  | 53,045,440 | 53,185,631 | 3 | 0 | 3 | 1 |
| Case 87 | 1  | 53,192,187 | 53,502,973 | 2 | 0 | 2 | 1 |
| Case 87 | 1  | 53,503,282 | 55,223,536 | 3 | 0 | 3 | 1 |
| Case 87 | 1  | 55,223,681 | 55,251,766 | 2 | 0 | 2 | 1 |
| Case 87 | 1  | 55,252,514 | 55,521,109 | 3 | 0 | 3 | 1 |
| Case 87 | 1  | 55,521,701 | 55,719,127 | 2 | 0 | 2 | 1 |
| Case 87 | 1  | 55,719,166 | 56,099,371 | 3 | 0 | 3 | 1 |
| Case 87 | 1  | 56,101,597 | 56,269,821 | 2 | 0 | 2 | 1 |
| Case 87 | 1  | 56,279,686 | 57,042,954 | 3 | 0 | 3 | 1 |
| Case 87 | 1  | 57,049,977 | 57,224,387 | 2 | 0 | 2 | 1 |
| Case 87 | 1  | 57,231,991 | 58,111,045 | 3 | 0 | 3 | 1 |
| Case 87 | 1  | 58,120,489 | 58,288,317 | 2 | 0 | 2 | 1 |
| Case 87 | 1  | 58,292,621 | 58,946,647 | 3 | 0 | 3 | 1 |
| Case 87 | 1  | 58,946,710 | 59,040,719 | 2 | 0 | 2 | 1 |
| Case 87 | 1  | 59,041,092 | 59,114,438 | 3 | 0 | 3 | 1 |
| Case 87 | 1  | 59,120,650 | 59,157,753 | 2 | 0 | 2 | 1 |
| Case 87 | 1  | 59,162,148 | 59,283,572 | 3 | 0 | 3 | 1 |
| Case 87 | 1  | 59,283,810 | 59,394,773 | 2 | 0 | 2 | 1 |
| Case 87 | 1  | 59,395,523 | 60,224,206 | 3 | 0 | 3 | 1 |
| Case 87 | 1  | 60,226,496 | 60,366,337 | 2 | 0 | 2 | 1 |
| Case 87 | 1  | 60,366,386 | 60,383,417 | 3 | 0 | 3 | 1 |
| Case 87 | 1  | 60,383,868 | 60,391,280 | 2 | 0 | 2 | 1 |
| Case 87 | 1  | 60,391,946 | 60,505,480 | 3 | 0 | 3 | 1 |
| Case 87 | 1  | 60,505,578 | 60,589,775 | 2 | 0 | 2 | 1 |
| Case 87 | 1  | 60,594,980 | 61,554,627 | 3 | 0 | 3 | 1 |

|         |   |             |             |   |   |   |   |
|---------|---|-------------|-------------|---|---|---|---|
| Case 87 | 1 | 61,558,197  | 61,865,995  | 2 | 0 | 2 | 1 |
| Case 87 | 1 | 61,869,118  | 62,101,673  | 3 | 0 | 3 | 1 |
| Case 87 | 1 | 62,102,307  | 62,575,911  | 2 | 0 | 2 | 1 |
| Case 87 | 1 | 62,577,750  | 62,898,142  | 3 | 0 | 3 | 1 |
| Case 87 | 1 | 62,905,542  | 63,362,324  | 2 | 0 | 2 | 1 |
| Case 87 | 1 | 63,363,624  | 63,578,064  | 3 | 0 | 3 | 1 |
| Case 87 | 1 | 63,580,025  | 64,056,411  | 2 | 0 | 2 | 1 |
| Case 87 | 1 | 64,059,266  | 65,772,315  | 3 | 0 | 3 | 1 |
| Case 87 | 1 | 65,776,702  | 65,858,462  | 2 | 0 | 2 | 1 |
| Case 87 | 1 | 65,861,798  | 66,048,389  | 3 | 0 | 3 | 1 |
| Case 87 | 1 | 66,048,622  | 67,063,385  | 2 | 0 | 2 | 1 |
| Case 87 | 1 | 67,066,555  | 67,208,622  | 3 | 0 | 3 | 1 |
| Case 87 | 1 | 67,209,088  | 67,896,672  | 2 | 0 | 2 | 1 |
| Case 87 | 1 | 67,908,644  | 68,338,248  | 3 | 0 | 3 | 1 |
| Case 87 | 1 | 68,343,642  | 68,475,955  | 2 | 0 | 2 | 1 |
| Case 87 | 1 | 68,480,671  | 68,703,843  | 3 | 0 | 3 | 1 |
| Case 87 | 1 | 68,711,533  | 70,818,576  | 2 | 0 | 2 | 1 |
| Case 87 | 1 | 70,819,679  | 70,883,840  | 3 | 0 | 3 | 1 |
| Case 87 | 1 | 70,887,099  | 74,948,186  | 2 | 0 | 2 | 1 |
| Case 87 | 1 | 74,954,900  | 75,038,747  | 3 | 0 | 3 | 1 |
| Case 87 | 1 | 75,038,833  | 76,530,882  | 2 | 0 | 2 | 1 |
| Case 87 | 1 | 76,534,883  | 76,782,834  | 3 | 0 | 3 | 1 |
| Case 87 | 1 | 76,784,636  | 77,918,347  | 2 | 0 | 2 | 1 |
| Case 87 | 1 | 77,924,890  | 78,024,602  | 3 | 0 | 3 | 1 |
| Case 87 | 1 | 78,025,454  | 85,203,780  | 2 | 0 | 2 | 1 |
| Case 87 | 1 | 85,205,632  | 85,551,538  | 3 | 0 | 3 | 1 |
| Case 87 | 1 | 85,551,595  | 85,971,852  | 2 | 0 | 2 | 1 |
| Case 87 | 1 | 85,972,024  | 86,121,096  | 3 | 0 | 3 | 1 |
| Case 87 | 1 | 86,121,895  | 86,934,698  | 2 | 0 | 2 | 1 |
| Case 87 | 1 | 86,934,908  | 86,974,115  | 3 | 0 | 3 | 1 |
| Case 87 | 1 | 86,981,256  | 87,129,397  | 2 | 0 | 2 | 1 |
| Case 87 | 1 | 87,156,469  | 87,381,454  | 3 | 0 | 3 | 1 |
| Case 87 | 1 | 87,428,302  | 87,573,537  | 2 | 0 | 2 | 1 |
| Case 87 | 1 | 87,576,481  | 87,798,013  | 3 | 0 | 3 | 1 |
| Case 87 | 1 | 87,803,200  | 87,950,279  | 2 | 0 | 2 | 1 |
| Case 87 | 1 | 87,954,542  | 88,209,341  | 3 | 0 | 3 | 1 |
| Case 87 | 1 | 88,209,373  | 89,616,127  | 2 | 0 | 2 | 1 |
| Case 87 | 1 | 89,616,171  | 89,728,008  | 3 | 0 | 3 | 1 |
| Case 87 | 1 | 89,728,437  | 89,982,719  | 2 | 0 | 2 | 1 |
| Case 87 | 1 | 89,983,184  | 90,465,140  | 3 | 0 | 3 | 1 |
| Case 87 | 1 | 90,470,722  | 90,532,256  | 2 | 0 | 2 | 1 |
| Case 87 | 1 | 90,532,766  | 90,835,677  | 3 | 0 | 3 | 1 |
| Case 87 | 1 | 90,836,739  | 91,165,138  | 2 | 0 | 2 | 1 |
| Case 87 | 1 | 91,169,965  | 91,364,568  | 3 | 0 | 3 | 1 |
| Case 87 | 1 | 91,380,305  | 91,558,038  | 2 | 0 | 2 | 1 |
| Case 87 | 1 | 91,558,057  | 91,658,920  | 3 | 0 | 3 | 1 |
| Case 87 | 1 | 91,659,939  | 91,990,487  | 2 | 0 | 2 | 1 |
| Case 87 | 1 | 91,999,640  | 92,358,371  | 3 | 0 | 3 | 1 |
| Case 87 | 1 | 92,359,242  | 94,030,534  | 2 | 0 | 2 | 1 |
| Case 87 | 1 | 94,032,862  | 94,224,065  | 3 | 0 | 3 | 1 |
| Case 87 | 1 | 94,228,900  | 94,455,721  | 2 | 0 | 2 | 1 |
| Case 87 | 1 | 94,458,421  | 94,611,300  | 3 | 0 | 3 | 1 |
| Case 87 | 1 | 94,629,643  | 94,724,254  | 2 | 0 | 2 | 1 |
| Case 87 | 1 | 94,729,088  | 94,794,245  | 3 | 0 | 3 | 1 |
| Case 87 | 1 | 94,807,102  | 95,230,514  | 4 | 0 | 4 | 1 |
| Case 87 | 1 | 95,232,272  | 95,609,563  | 3 | 0 | 3 | 1 |
| Case 87 | 1 | 95,611,650  | 95,776,618  | 2 | 0 | 2 | 1 |
| Case 87 | 1 | 95,776,788  | 96,118,307  | 3 | 0 | 3 | 1 |
| Case 87 | 1 | 96,119,408  | 99,960,670  | 2 | 0 | 2 | 1 |
| Case 87 | 1 | 99,963,251  | 100,145,443 | 3 | 0 | 3 | 1 |
| Case 87 | 1 | 100,147,287 | 100,684,231 | 2 | 0 | 2 | 1 |

|         |   |             |             |   |   |   |   |
|---------|---|-------------|-------------|---|---|---|---|
| Case 87 | 1 | 100,693,294 | 100,991,834 | 3 | 0 | 3 | 1 |
| Case 87 | 1 | 100,996,074 | 101,047,693 | 2 | 0 | 2 | 1 |
| Case 87 | 1 | 101,048,203 | 101,194,687 | 3 | 0 | 3 | 1 |
| Case 87 | 1 | 101,194,884 | 101,586,819 | 2 | 0 | 2 | 1 |
| Case 87 | 1 | 101,588,361 | 101,843,149 | 3 | 0 | 3 | 1 |
| Case 87 | 1 | 101,847,845 | 104,365,377 | 2 | 0 | 2 | 1 |
| Case 87 | 1 | 104,375,470 | 104,480,469 | 3 | 2 | 5 | 0 |
| Case 87 | 1 | 104,483,838 | 104,945,065 | 2 | 2 | 4 | 0 |
| Case 87 | 1 | 104,957,563 | 109,154,667 | 3 | 2 | 5 | 0 |
| Case 87 | 1 | 109,154,858 | 110,302,450 | 2 | 2 | 4 | 0 |
| Case 87 | 1 | 110,305,188 | 112,093,989 | 3 | 2 | 5 | 0 |
| Case 87 | 1 | 112,095,169 | 112,339,880 | 2 | 2 | 4 | 0 |
| Case 87 | 1 | 112,342,509 | 114,920,097 | 3 | 2 | 5 | 0 |
| Case 87 | 1 | 114,927,201 | 115,576,727 | 2 | 2 | 4 | 0 |
| Case 87 | 1 | 115,577,127 | 116,534,789 | 3 | 2 | 5 | 0 |
| Case 87 | 1 | 116,534,797 | 116,635,176 | 2 | 2 | 4 | 0 |
| Case 87 | 1 | 116,645,757 | 117,826,699 | 3 | 2 | 5 | 0 |
| Case 87 | 1 | 117,829,261 | 120,415,364 | 5 | 1 | 6 | 0 |
| Case 87 | 1 | 120,418,844 | 120,418,844 | 3 | 1 | 4 | 0 |
| Case 87 | 1 | 120,422,838 | 120,438,902 | 2 | 0 | 2 | 1 |
| Case 87 | 1 | 120,455,095 | 121,346,616 | 3 | 2 | 5 | 0 |
| Case 87 | 1 | 142,649,718 | 145,415,567 | 3 | 2 | 5 | 0 |
| Case 87 | 1 | 145,415,669 | 148,937,908 | 4 | 2 | 6 | 0 |
| Case 87 | 1 | 149,039,031 | 149,201,987 | 2 | 0 | 2 | 1 |
| Case 87 | 1 | 149,660,940 | 149,922,042 | 3 | 2 | 5 | 0 |
| Case 87 | 1 | 149,931,541 | 150,923,099 | 4 | 2 | 6 | 0 |
| Case 87 | 1 | 150,923,100 | 151,150,857 | 3 | 2 | 5 | 0 |
| Case 87 | 1 | 151,152,835 | 152,057,472 | 4 | 2 | 6 | 0 |
| Case 87 | 1 | 152,057,793 | 152,286,638 | 3 | 2 | 5 | 0 |
| Case 87 | 1 | 152,286,889 | 155,003,954 | 4 | 2 | 6 | 0 |
| Case 87 | 1 | 155,004,049 | 166,445,116 | 3 | 2 | 5 | 0 |
| Case 87 | 1 | 166,447,321 | 171,179,287 | 4 | 2 | 6 | 0 |
| Case 87 | 1 | 171,179,477 | 171,509,327 | 5 | 2 | 7 | 0 |
| Case 87 | 1 | 171,509,373 | 171,510,693 | 3 | 2 | 5 | 0 |
| Case 87 | 1 | 171,510,707 | 174,781,083 | 4 | 2 | 6 | 0 |
| Case 87 | 1 | 174,794,144 | 175,072,789 | 3 | 0 | 3 | 1 |
| Case 87 | 1 | 175,083,411 | 175,852,209 | 4 | 0 | 4 | 1 |
| Case 87 | 1 | 175,859,765 | 177,652,462 | 3 | 0 | 3 | 1 |
| Case 87 | 1 | 177,656,039 | 177,986,454 | 4 | 0 | 4 | 1 |
| Case 87 | 1 | 177,989,198 | 178,466,769 | 3 | 0 | 3 | 1 |
| Case 87 | 1 | 178,476,061 | 178,605,501 | 4 | 0 | 4 | 1 |
| Case 87 | 1 | 178,617,359 | 180,124,061 | 3 | 0 | 3 | 1 |
| Case 87 | 1 | 180,124,667 | 180,570,408 | 4 | 0 | 4 | 1 |
| Case 87 | 1 | 180,575,168 | 181,002,479 | 3 | 0 | 3 | 1 |
| Case 87 | 1 | 181,002,768 | 182,443,489 | 4 | 0 | 4 | 1 |
| Case 87 | 1 | 182,446,188 | 188,075,300 | 3 | 0 | 3 | 1 |
| Case 87 | 1 | 188,081,057 | 188,624,613 | 5 | 0 | 5 | 1 |
| Case 87 | 1 | 188,629,757 | 189,984,428 | 6 | 0 | 6 | 1 |
| Case 87 | 1 | 189,997,930 | 190,650,449 | 4 | 0 | 4 | 1 |
| Case 87 | 1 | 190,651,533 | 192,100,668 | 3 | 0 | 3 | 1 |
| Case 87 | 1 | 192,105,432 | 194,032,486 | 4 | 0 | 4 | 1 |
| Case 87 | 1 | 194,033,705 | 195,745,968 | 3 | 0 | 3 | 1 |
| Case 87 | 1 | 195,747,936 | 195,826,738 | 5 | 0 | 5 | 1 |
| Case 87 | 1 | 195,831,358 | 196,256,498 | 6 | 0 | 6 | 1 |
| Case 87 | 1 | 196,281,802 | 197,912,389 | 5 | 0 | 5 | 1 |
| Case 87 | 1 | 197,913,101 | 200,278,759 | 6 | 0 | 6 | 1 |
| Case 87 | 1 | 200,285,178 | 205,211,155 | 5 | 0 | 5 | 1 |
| Case 87 | 1 | 205,213,883 | 205,589,237 | 6 | 0 | 6 | 1 |
| Case 87 | 1 | 205,589,455 | 208,535,774 | 5 | 0 | 5 | 1 |
| Case 87 | 1 | 208,547,496 | 228,424,600 | 6 | 0 | 6 | 1 |
| Case 87 | 1 | 228,427,193 | 228,520,973 | 5 | 0 | 5 | 1 |



|         |   |             |             |   |   |   |   |
|---------|---|-------------|-------------|---|---|---|---|
| Case 87 | 1 | 228,520,995 | 248,801,588 | 6 | 0 | 6 | 1 |
| Case 87 | 1 | 248,802,243 | 249,218,992 | 5 | 0 | 5 | 1 |
| Case 87 | 2 | 18,674      | 549,926     | 3 | 0 | 3 | 1 |
| Case 87 | 2 | 553,264     | 57,470,700  | 4 | 0 | 4 | 1 |
| Case 87 | 2 | 57,482,289  | 71,335,872  | 4 | 1 | 5 | 0 |
| Case 87 | 2 | 71,337,111  | 71,654,175  | 3 | 1 | 4 | 0 |
| Case 87 | 2 | 71,654,389  | 73,641,652  | 4 | 1 | 5 | 0 |
| Case 87 | 2 | 73,646,411  | 73,828,493  | 4 | 0 | 4 | 1 |
| Case 87 | 2 | 73,828,523  | 79,885,036  | 4 | 1 | 5 | 0 |
| Case 87 | 2 | 79,885,936  | 79,925,969  | 4 | 0 | 4 | 1 |
| Case 87 | 2 | 79,928,312  | 88,874,764  | 4 | 1 | 5 | 0 |
| Case 87 | 2 | 88,874,891  | 92,081,640  | 3 | 1 | 4 | 0 |
| Case 87 | 2 | 95,429,424  | 95,954,266  | 3 | 1 | 4 | 0 |
| Case 87 | 2 | 95,954,294  | 104,004,791 | 4 | 1 | 5 | 0 |
| Case 87 | 2 | 104,017,337 | 124,940,432 | 4 | 0 | 4 | 1 |
| Case 87 | 2 | 124,946,945 | 127,424,849 | 3 | 0 | 3 | 1 |
| Case 87 | 2 | 127,426,034 | 128,038,196 | 4 | 0 | 4 | 1 |
| Case 87 | 2 | 128,038,202 | 129,020,968 | 3 | 0 | 3 | 1 |
| Case 87 | 2 | 129,025,949 | 129,826,843 | 4 | 0 | 4 | 1 |
| Case 87 | 2 | 129,830,093 | 133,269,261 | 3 | 0 | 3 | 1 |
| Case 87 | 2 | 133,271,657 | 133,541,454 | 4 | 0 | 4 | 1 |
| Case 87 | 2 | 133,541,575 | 136,624,264 | 3 | 0 | 3 | 1 |
| Case 87 | 2 | 136,627,911 | 137,320,964 | 4 | 0 | 4 | 1 |
| Case 87 | 2 | 137,321,430 | 159,564,276 | 3 | 0 | 3 | 1 |
| Case 87 | 2 | 159,564,450 | 160,087,535 | 4 | 0 | 4 | 1 |
| Case 87 | 2 | 160,088,793 | 168,814,408 | 3 | 0 | 3 | 1 |
| Case 87 | 2 | 168,817,002 | 169,173,650 | 4 | 0 | 4 | 1 |
| Case 87 | 2 | 169,174,367 | 171,240,663 | 3 | 0 | 3 | 1 |
| Case 87 | 2 | 171,242,127 | 171,702,960 | 4 | 0 | 4 | 1 |
| Case 87 | 2 | 171,708,100 | 172,943,351 | 3 | 0 | 3 | 1 |
| Case 87 | 2 | 172,943,967 | 173,262,339 | 4 | 0 | 4 | 1 |
| Case 87 | 2 | 173,267,081 | 174,251,944 | 3 | 0 | 3 | 1 |
| Case 87 | 2 | 174,252,625 | 174,584,617 | 4 | 0 | 4 | 1 |
| Case 87 | 2 | 174,590,064 | 176,728,443 | 3 | 0 | 3 | 1 |
| Case 87 | 2 | 176,729,255 | 176,964,947 | 4 | 0 | 4 | 1 |
| Case 87 | 2 | 176,965,086 | 179,319,391 | 5 | 0 | 5 | 1 |
| Case 87 | 2 | 179,320,828 | 179,839,819 | 4 | 0 | 4 | 1 |
| Case 87 | 2 | 179,839,833 | 185,638,875 | 5 | 0 | 5 | 1 |
| Case 87 | 2 | 185,647,985 | 187,440,683 | 4 | 0 | 4 | 1 |
| Case 87 | 2 | 187,441,142 | 190,559,712 | 5 | 0 | 5 | 1 |
| Case 87 | 2 | 190,560,942 | 190,728,953 | 4 | 0 | 4 | 1 |
| Case 87 | 2 | 190,731,832 | 196,545,314 | 5 | 0 | 5 | 1 |
| Case 87 | 2 | 196,545,348 | 197,060,875 | 4 | 0 | 4 | 1 |
| Case 87 | 2 | 197,063,250 | 197,435,931 | 5 | 0 | 5 | 1 |
| Case 87 | 2 | 197,457,241 | 197,797,224 | 4 | 0 | 4 | 1 |
| Case 87 | 2 | 197,799,124 | 198,352,722 | 5 | 0 | 5 | 1 |
| Case 87 | 2 | 198,354,414 | 210,847,623 | 4 | 0 | 4 | 1 |
| Case 87 | 2 | 210,849,283 | 210,964,379 | 3 | 2 | 5 | 0 |
| Case 87 | 2 | 210,980,437 | 213,785,217 | 2 | 2 | 4 | 0 |
| Case 87 | 2 | 213,788,877 | 216,484,582 | 3 | 2 | 5 | 0 |
| Case 87 | 2 | 216,484,751 | 216,783,409 | 4 | 2 | 6 | 0 |
| Case 87 | 2 | 216,783,829 | 222,087,055 | 3 | 2 | 5 | 0 |
| Case 87 | 2 | 222,088,183 | 222,283,504 | 4 | 2 | 6 | 0 |
| Case 87 | 2 | 222,283,514 | 223,954,609 | 3 | 2 | 5 | 0 |
| Case 87 | 2 | 223,959,874 | 224,408,490 | 4 | 2 | 6 | 0 |
| Case 87 | 2 | 224,408,554 | 225,279,474 | 3 | 2 | 5 | 0 |
| Case 87 | 2 | 225,281,602 | 225,347,574 | 4 | 2 | 6 | 0 |
| Case 87 | 2 | 225,347,713 | 226,319,552 | 3 | 2 | 5 | 0 |
| Case 87 | 2 | 226,336,889 | 227,555,875 | 2 | 0 | 2 | 1 |
| Case 87 | 2 | 227,556,383 | 227,872,995 | 3 | 0 | 3 | 1 |
| Case 87 | 2 | 227,875,130 | 228,458,917 | 2 | 0 | 2 | 1 |

|         |   |             |             |   |   |   |   |
|---------|---|-------------|-------------|---|---|---|---|
| Case 87 | 2 | 228,460,244 | 228,677,694 | 3 | 0 | 3 | 1 |
| Case 87 | 2 | 228,677,842 | 228,825,101 | 2 | 0 | 2 | 1 |
| Case 87 | 2 | 228,838,054 | 229,031,147 | 3 | 0 | 3 | 1 |
| Case 87 | 2 | 229,031,984 | 229,639,826 | 2 | 0 | 2 | 1 |
| Case 87 | 2 | 229,641,638 | 230,211,434 | 3 | 0 | 3 | 1 |
| Case 87 | 2 | 230,214,932 | 230,373,798 | 2 | 0 | 2 | 1 |
| Case 87 | 2 | 230,376,066 | 230,554,795 | 3 | 0 | 3 | 1 |
| Case 87 | 2 | 230,563,118 | 230,778,385 | 2 | 0 | 2 | 1 |
| Case 87 | 2 | 230,787,061 | 231,282,791 | 3 | 0 | 3 | 1 |
| Case 87 | 2 | 231,283,711 | 231,437,079 | 2 | 0 | 2 | 1 |
| Case 87 | 2 | 231,440,375 | 231,913,056 | 3 | 0 | 3 | 1 |
| Case 87 | 2 | 231,914,845 | 232,011,040 | 2 | 0 | 2 | 1 |
| Case 87 | 2 | 232,028,424 | 233,632,766 | 3 | 0 | 3 | 1 |
| Case 87 | 2 | 233,633,295 | 233,736,349 | 2 | 0 | 2 | 1 |
| Case 87 | 2 | 233,741,053 | 234,581,834 | 3 | 0 | 3 | 1 |
| Case 87 | 2 | 234,581,920 | 234,596,836 | 2 | 0 | 2 | 1 |
| Case 87 | 2 | 234,597,087 | 238,678,616 | 3 | 0 | 3 | 1 |
| Case 87 | 2 | 238,678,622 | 239,051,453 | 2 | 0 | 2 | 1 |
| Case 87 | 2 | 239,051,536 | 241,382,083 | 3 | 0 | 3 | 1 |
| Case 87 | 2 | 241,385,787 | 241,439,537 | 2 | 0 | 2 | 1 |
| Case 87 | 2 | 241,439,955 | 241,531,174 | 3 | 0 | 3 | 1 |
| Case 87 | 2 | 241,531,414 | 241,609,579 | 2 | 0 | 2 | 1 |
| Case 87 | 2 | 241,623,894 | 241,824,647 | 3 | 0 | 3 | 1 |
| Case 87 | 2 | 241,825,253 | 242,012,729 | 2 | 0 | 2 | 1 |
| Case 87 | 2 | 242,012,759 | 242,651,459 | 3 | 0 | 3 | 1 |
| Case 87 | 2 | 242,663,935 | 242,758,301 | 2 | 0 | 2 | 1 |
| Case 87 | 2 | 242,763,542 | 243,048,760 | 3 | 0 | 3 | 1 |
| Case 87 | 3 | 61,495      | 3,769,424   | 3 | 0 | 3 | 1 |
| Case 87 | 3 | 3,769,493   | 3,925,023   | 4 | 0 | 4 | 1 |
| Case 87 | 3 | 3,934,139   | 4,582,227   | 3 | 0 | 3 | 1 |
| Case 87 | 3 | 4,583,026   | 5,135,111   | 4 | 0 | 4 | 1 |
| Case 87 | 3 | 5,135,426   | 5,319,430   | 3 | 0 | 3 | 1 |
| Case 87 | 3 | 5,327,270   | 5,493,089   | 4 | 0 | 4 | 1 |
| Case 87 | 3 | 5,493,389   | 8,675,584   | 3 | 0 | 3 | 1 |
| Case 87 | 3 | 8,675,778   | 8,788,336   | 4 | 0 | 4 | 1 |
| Case 87 | 3 | 8,792,728   | 9,032,486   | 3 | 0 | 3 | 1 |
| Case 87 | 3 | 9,034,145   | 9,299,830   | 4 | 0 | 4 | 1 |
| Case 87 | 3 | 9,300,870   | 10,383,517  | 3 | 0 | 3 | 1 |
| Case 87 | 3 | 10,383,996  | 12,272,199  | 4 | 0 | 4 | 1 |
| Case 87 | 3 | 12,272,683  | 13,053,937  | 3 | 0 | 3 | 1 |
| Case 87 | 3 | 13,055,576  | 13,357,986  | 4 | 0 | 4 | 1 |
| Case 87 | 3 | 13,360,604  | 13,659,897  | 3 | 0 | 3 | 1 |
| Case 87 | 3 | 13,660,463  | 14,967,590  | 4 | 0 | 4 | 1 |
| Case 87 | 3 | 14,967,622  | 15,292,741  | 3 | 0 | 3 | 1 |
| Case 87 | 3 | 15,295,364  | 15,595,293  | 4 | 0 | 4 | 1 |
| Case 87 | 3 | 15,595,808  | 16,052,206  | 3 | 0 | 3 | 1 |
| Case 87 | 3 | 16,068,354  | 16,239,063  | 4 | 0 | 4 | 1 |
| Case 87 | 3 | 16,242,101  | 23,545,630  | 3 | 0 | 3 | 1 |
| Case 87 | 3 | 23,549,075  | 23,921,062  | 4 | 0 | 4 | 1 |
| Case 87 | 3 | 23,921,114  | 25,460,596  | 3 | 0 | 3 | 1 |
| Case 87 | 3 | 25,461,807  | 25,633,685  | 4 | 0 | 4 | 1 |
| Case 87 | 3 | 25,635,127  | 31,008,073  | 3 | 0 | 3 | 1 |
| Case 87 | 3 | 31,008,319  | 31,541,869  | 4 | 0 | 4 | 1 |
| Case 87 | 3 | 31,549,953  | 31,701,082  | 3 | 0 | 3 | 1 |
| Case 87 | 3 | 31,702,921  | 31,955,806  | 4 | 0 | 4 | 1 |
| Case 87 | 3 | 31,956,117  | 37,458,998  | 3 | 0 | 3 | 1 |
| Case 87 | 3 | 37,459,028  | 38,365,841  | 4 | 0 | 4 | 1 |
| Case 87 | 3 | 38,370,556  | 39,137,278  | 3 | 0 | 3 | 1 |
| Case 87 | 3 | 39,138,840  | 39,334,720  | 4 | 0 | 4 | 1 |
| Case 87 | 3 | 39,335,450  | 42,109,009  | 3 | 0 | 3 | 1 |
| Case 87 | 3 | 42,110,843  | 42,306,446  | 4 | 0 | 4 | 1 |

|         |   |             |             |   |   |   |   |
|---------|---|-------------|-------------|---|---|---|---|
| Case 87 | 3 | 42,311,428  | 44,948,491  | 3 | 0 | 3 | 1 |
| Case 87 | 3 | 44,948,518  | 45,395,685  | 4 | 0 | 4 | 1 |
| Case 87 | 3 | 45,397,986  | 49,760,879  | 3 | 0 | 3 | 1 |
| Case 87 | 3 | 49,761,081  | 50,085,153  | 4 | 0 | 4 | 1 |
| Case 87 | 3 | 50,085,708  | 50,378,628  | 5 | 0 | 5 | 1 |
| Case 87 | 3 | 50,379,081  | 50,549,867  | 4 | 0 | 4 | 1 |
| Case 87 | 3 | 50,568,412  | 52,817,256  | 3 | 0 | 3 | 1 |
| Case 87 | 3 | 52,817,327  | 53,844,063  | 4 | 0 | 4 | 1 |
| Case 87 | 3 | 53,844,069  | 54,053,981  | 3 | 0 | 3 | 1 |
| Case 87 | 3 | 54,063,193  | 54,173,568  | 4 | 0 | 4 | 1 |
| Case 87 | 3 | 54,178,199  | 57,006,140  | 3 | 0 | 3 | 1 |
| Case 87 | 3 | 57,009,097  | 57,142,094  | 4 | 0 | 4 | 1 |
| Case 87 | 3 | 57,143,567  | 57,908,707  | 3 | 0 | 3 | 1 |
| Case 87 | 3 | 57,913,714  | 58,209,423  | 4 | 0 | 4 | 1 |
| Case 87 | 3 | 58,211,083  | 58,558,769  | 3 | 0 | 3 | 1 |
| Case 87 | 3 | 58,560,043  | 58,631,270  | 4 | 0 | 4 | 1 |
| Case 87 | 3 | 58,631,321  | 59,097,593  | 3 | 0 | 3 | 1 |
| Case 87 | 3 | 59,112,888  | 59,650,162  | 4 | 0 | 4 | 1 |
| Case 87 | 3 | 59,658,825  | 60,288,428  | 3 | 0 | 3 | 1 |
| Case 87 | 3 | 60,289,842  | 60,511,133  | 0 | 0 | 0 | 0 |
| Case 87 | 3 | 60,512,505  | 60,512,505  | 2 | 0 | 2 | 1 |
| Case 87 | 3 | 60,512,522  | 60,572,073  | 1 | 0 | 1 | 0 |
| Case 87 | 3 | 60,573,681  | 61,429,785  | 3 | 0 | 3 | 1 |
| Case 87 | 3 | 61,432,694  | 61,959,582  | 4 | 0 | 4 | 1 |
| Case 87 | 3 | 61,960,632  | 63,981,419  | 3 | 0 | 3 | 1 |
| Case 87 | 3 | 63,981,424  | 64,121,290  | 4 | 0 | 4 | 1 |
| Case 87 | 3 | 64,123,647  | 64,177,029  | 3 | 0 | 3 | 1 |
| Case 87 | 3 | 64,184,343  | 64,587,656  | 4 | 0 | 4 | 1 |
| Case 87 | 3 | 64,587,688  | 65,276,107  | 3 | 0 | 3 | 1 |
| Case 87 | 3 | 65,279,590  | 65,415,516  | 4 | 0 | 4 | 1 |
| Case 87 | 3 | 65,415,540  | 65,652,762  | 3 | 0 | 3 | 1 |
| Case 87 | 3 | 65,658,302  | 66,852,927  | 4 | 0 | 4 | 1 |
| Case 87 | 3 | 66,854,987  | 71,403,136  | 3 | 0 | 3 | 1 |
| Case 87 | 3 | 71,408,319  | 72,747,253  | 4 | 0 | 4 | 1 |
| Case 87 | 3 | 72,766,902  | 81,346,834  | 3 | 0 | 3 | 1 |
| Case 87 | 3 | 81,348,262  | 81,586,077  | 4 | 0 | 4 | 1 |
| Case 87 | 3 | 81,586,439  | 83,512,237  | 3 | 0 | 3 | 1 |
| Case 87 | 3 | 83,518,228  | 83,645,386  | 4 | 0 | 4 | 1 |
| Case 87 | 3 | 83,651,289  | 86,629,088  | 3 | 0 | 3 | 1 |
| Case 87 | 3 | 86,630,845  | 90,442,925  | 4 | 0 | 4 | 1 |
| Case 87 | 3 | 93,537,290  | 96,885,697  | 4 | 0 | 4 | 1 |
| Case 87 | 3 | 96,900,587  | 98,988,161  | 3 | 0 | 3 | 1 |
| Case 87 | 3 | 99,003,734  | 100,354,683 | 4 | 0 | 4 | 1 |
| Case 87 | 3 | 100,357,671 | 103,335,339 | 3 | 0 | 3 | 1 |
| Case 87 | 3 | 103,345,439 | 107,049,360 | 4 | 0 | 4 | 1 |
| Case 87 | 3 | 107,050,997 | 121,285,031 | 3 | 0 | 3 | 1 |
| Case 87 | 3 | 121,288,890 | 121,356,079 | 4 | 0 | 4 | 1 |
| Case 87 | 3 | 121,366,216 | 123,095,312 | 3 | 0 | 3 | 1 |
| Case 87 | 3 | 123,095,943 | 123,452,711 | 4 | 0 | 4 | 1 |
| Case 87 | 3 | 123,452,836 | 127,415,047 | 3 | 0 | 3 | 1 |
| Case 87 | 3 | 127,416,473 | 127,568,933 | 4 | 0 | 4 | 1 |
| Case 87 | 3 | 127,577,789 | 127,977,978 | 3 | 0 | 3 | 1 |
| Case 87 | 3 | 127,981,001 | 128,243,631 | 4 | 0 | 4 | 1 |
| Case 87 | 3 | 128,245,696 | 131,663,289 | 3 | 0 | 3 | 1 |
| Case 87 | 3 | 131,663,987 | 131,797,500 | 4 | 0 | 4 | 1 |
| Case 87 | 3 | 131,797,662 | 132,969,490 | 3 | 0 | 3 | 1 |
| Case 87 | 3 | 132,978,969 | 140,178,381 | 4 | 0 | 4 | 1 |
| Case 87 | 3 | 140,178,410 | 148,615,695 | 3 | 0 | 3 | 1 |
| Case 87 | 3 | 148,624,027 | 164,588,702 | 4 | 0 | 4 | 1 |
| Case 87 | 3 | 164,589,184 | 164,871,580 | 3 | 0 | 3 | 1 |
| Case 87 | 3 | 164,876,267 | 180,321,090 | 4 | 0 | 4 | 1 |

|         |   |             |             |   |   |   |   |
|---------|---|-------------|-------------|---|---|---|---|
| Case 87 | 3 | 180,321,862 | 180,359,860 | 3 | 0 | 3 | 1 |
| Case 87 | 3 | 180,359,874 | 197,838,262 | 4 | 0 | 4 | 1 |
| Case 87 | 4 | 71,566      | 492,129     | 3 | 0 | 3 | 1 |
| Case 87 | 4 | 493,147     | 13,193,295  | 2 | 2 | 4 | 0 |
| Case 87 | 4 | 13,201,728  | 16,261,094  | 6 | 1 | 7 | 0 |
| Case 87 | 4 | 16,268,263  | 16,922,182  | 3 | 2 | 5 | 0 |
| Case 87 | 4 | 16,927,427  | 17,178,058  | 4 | 2 | 6 | 0 |
| Case 87 | 4 | 17,181,579  | 18,207,538  | 3 | 2 | 5 | 0 |
| Case 87 | 4 | 18,208,997  | 19,428,544  | 4 | 2 | 6 | 0 |
| Case 87 | 4 | 19,445,650  | 19,751,585  | 3 | 2 | 5 | 0 |
| Case 87 | 4 | 19,753,174  | 20,251,117  | 4 | 2 | 6 | 0 |
| Case 87 | 4 | 20,254,298  | 22,425,846  | 3 | 2 | 5 | 0 |
| Case 87 | 4 | 22,425,893  | 31,525,698  | 4 | 2 | 6 | 0 |
| Case 87 | 4 | 31,531,497  | 32,174,131  | 2 | 0 | 2 | 1 |
| Case 87 | 4 | 32,186,096  | 32,745,997  | 3 | 2 | 5 | 0 |
| Case 87 | 4 | 32,749,519  | 33,883,366  | 5 | 2 | 7 | 0 |
| Case 87 | 4 | 33,910,151  | 34,356,554  | 3 | 2 | 5 | 0 |
| Case 87 | 4 | 34,370,370  | 34,831,143  | 2 | 2 | 4 | 0 |
| Case 87 | 4 | 34,841,364  | 35,673,557  | 3 | 2 | 5 | 0 |
| Case 87 | 4 | 35,676,909  | 36,573,898  | 4 | 2 | 6 | 0 |
| Case 87 | 4 | 36,583,469  | 36,583,469  | 3 | 2 | 5 | 0 |
| Case 87 | 4 | 36,597,275  | 40,391,816  | 2 | 2 | 4 | 0 |
| Case 87 | 4 | 40,393,828  | 41,977,766  | 3 | 2 | 5 | 0 |
| Case 87 | 4 | 41,983,841  | 42,256,594  | 2 | 2 | 4 | 0 |
| Case 87 | 4 | 42,265,464  | 45,139,673  | 6 | 1 | 7 | 0 |
| Case 87 | 4 | 45,164,637  | 45,956,780  | 5 | 2 | 7 | 0 |
| Case 87 | 4 | 45,956,988  | 45,995,759  | 3 | 2 | 5 | 0 |
| Case 87 | 4 | 46,025,913  | 47,347,289  | 4 | 2 | 6 | 0 |
| Case 87 | 4 | 47,350,872  | 47,356,566  | 5 | 1 | 6 | 0 |
| Case 87 | 4 | 47,359,371  | 49,061,141  | 6 | 1 | 7 | 0 |
| Case 87 | 4 | 49,061,848  | 49,620,898  | 7 | 0 | 7 | 1 |
| Case 87 | 4 | 52,697,856  | 59,180,928  | 7 | 0 | 7 | 1 |
| Case 87 | 4 | 59,211,129  | 59,378,549  | 0 | 0 | 0 | 0 |
| Case 87 | 4 | 59,388,759  | 67,234,740  | 2 | 0 | 2 | 1 |
| Case 87 | 4 | 67,236,121  | 67,242,685  | 3 | 2 | 5 | 0 |
| Case 87 | 4 | 67,253,757  | 68,436,883  | 2 | 0 | 2 | 1 |
| Case 87 | 4 | 68,441,091  | 69,283,448  | 3 | 2 | 5 | 0 |
| Case 87 | 4 | 69,337,325  | 71,165,491  | 2 | 0 | 2 | 1 |
| Case 87 | 4 | 71,165,706  | 71,555,361  | 3 | 0 | 3 | 1 |
| Case 87 | 4 | 71,555,595  | 71,917,988  | 2 | 0 | 2 | 1 |
| Case 87 | 4 | 71,926,314  | 74,310,754  | 3 | 2 | 5 | 0 |
| Case 87 | 4 | 74,310,768  | 74,447,930  | 2 | 2 | 4 | 0 |
| Case 87 | 4 | 74,451,031  | 74,718,101  | 3 | 2 | 5 | 0 |
| Case 87 | 4 | 74,718,941  | 75,067,842  | 4 | 2 | 6 | 0 |
| Case 87 | 4 | 75,082,112  | 75,851,372  | 2 | 0 | 2 | 1 |
| Case 87 | 4 | 75,857,836  | 75,899,133  | 3 | 2 | 5 | 0 |
| Case 87 | 4 | 75,911,362  | 76,809,385  | 4 | 2 | 6 | 0 |
| Case 87 | 4 | 76,809,396  | 76,878,716  | 3 | 0 | 3 | 1 |
| Case 87 | 4 | 76,878,836  | 77,409,795  | 2 | 0 | 2 | 1 |
| Case 87 | 4 | 77,410,318  | 77,961,377  | 3 | 0 | 3 | 1 |
| Case 87 | 4 | 77,969,298  | 78,087,306  | 2 | 0 | 2 | 1 |
| Case 87 | 4 | 78,098,806  | 78,562,573  | 3 | 0 | 3 | 1 |
| Case 87 | 4 | 78,573,559  | 79,081,466  | 2 | 0 | 2 | 1 |
| Case 87 | 4 | 79,083,490  | 79,460,455  | 3 | 0 | 3 | 1 |
| Case 87 | 4 | 79,461,844  | 81,103,562  | 2 | 0 | 2 | 1 |
| Case 87 | 4 | 81,104,548  | 81,192,363  | 3 | 0 | 3 | 1 |
| Case 87 | 4 | 81,196,107  | 82,324,877  | 2 | 0 | 2 | 1 |
| Case 87 | 4 | 82,325,636  | 82,843,970  | 3 | 0 | 3 | 1 |
| Case 87 | 4 | 82,862,484  | 83,347,225  | 2 | 0 | 2 | 1 |
| Case 87 | 4 | 83,347,711  | 83,740,718  | 3 | 0 | 3 | 1 |
| Case 87 | 4 | 83,748,617  | 84,372,998  | 2 | 0 | 2 | 1 |

|         |   |             |             |   |   |   |   |
|---------|---|-------------|-------------|---|---|---|---|
| Case 87 | 4 | 84,374,480  | 84,580,859  | 3 | 0 | 3 | 1 |
| Case 87 | 4 | 84,584,157  | 85,006,975  | 2 | 0 | 2 | 1 |
| Case 87 | 4 | 85,007,150  | 85,024,046  | 3 | 2 | 5 | 0 |
| Case 87 | 4 | 85,029,546  | 87,041,318  | 4 | 2 | 6 | 0 |
| Case 87 | 4 | 87,054,813  | 87,749,297  | 2 | 0 | 2 | 1 |
| Case 87 | 4 | 87,749,312  | 88,088,507  | 3 | 0 | 3 | 1 |
| Case 87 | 4 | 88,091,339  | 88,411,950  | 2 | 0 | 2 | 1 |
| Case 87 | 4 | 88,412,806  | 88,665,977  | 3 | 0 | 3 | 1 |
| Case 87 | 4 | 88,665,994  | 88,728,904  | 2 | 0 | 2 | 1 |
| Case 87 | 4 | 88,732,573  | 88,821,873  | 3 | 0 | 3 | 1 |
| Case 87 | 4 | 88,823,410  | 89,071,025  | 2 | 0 | 2 | 1 |
| Case 87 | 4 | 89,071,104  | 89,139,002  | 3 | 0 | 3 | 1 |
| Case 87 | 4 | 89,139,275  | 89,441,779  | 2 | 0 | 2 | 1 |
| Case 87 | 4 | 89,442,790  | 89,684,640  | 3 | 0 | 3 | 1 |
| Case 87 | 4 | 89,693,098  | 90,170,170  | 2 | 0 | 2 | 1 |
| Case 87 | 4 | 90,170,393  | 90,374,397  | 3 | 0 | 3 | 1 |
| Case 87 | 4 | 90,375,951  | 91,926,462  | 2 | 0 | 2 | 1 |
| Case 87 | 4 | 91,927,272  | 91,952,313  | 1 | 0 | 1 | 0 |
| Case 87 | 4 | 91,954,105  | 96,759,448  | 2 | 0 | 2 | 1 |
| Case 87 | 4 | 96,760,489  | 96,762,427  | 3 | 0 | 3 | 1 |
| Case 87 | 4 | 96,762,459  | 99,363,185  | 2 | 0 | 2 | 1 |
| Case 87 | 4 | 99,364,621  | 99,707,614  | 3 | 0 | 3 | 1 |
| Case 87 | 4 | 99,708,057  | 103,232,168 | 2 | 0 | 2 | 1 |
| Case 87 | 4 | 103,243,101 | 103,560,963 | 3 | 0 | 3 | 1 |
| Case 87 | 4 | 103,575,067 | 108,557,559 | 2 | 0 | 2 | 1 |
| Case 87 | 4 | 108,562,555 | 109,465,726 | 3 | 0 | 3 | 1 |
| Case 87 | 4 | 109,474,255 | 110,211,727 | 2 | 0 | 2 | 1 |
| Case 87 | 4 | 110,216,053 | 110,384,735 | 3 | 0 | 3 | 1 |
| Case 87 | 4 | 110,388,034 | 110,940,045 | 2 | 0 | 2 | 1 |
| Case 87 | 4 | 110,945,256 | 111,191,861 | 3 | 0 | 3 | 1 |
| Case 87 | 4 | 111,195,127 | 113,248,536 | 2 | 0 | 2 | 1 |
| Case 87 | 4 | 113,251,247 | 113,354,150 | 3 | 0 | 3 | 1 |
| Case 87 | 4 | 113,356,306 | 113,685,804 | 2 | 0 | 2 | 1 |
| Case 87 | 4 | 113,698,005 | 113,973,952 | 3 | 0 | 3 | 1 |
| Case 87 | 4 | 113,976,831 | 114,274,329 | 2 | 0 | 2 | 1 |
| Case 87 | 4 | 114,274,518 | 114,318,689 | 3 | 0 | 3 | 1 |
| Case 87 | 4 | 114,329,115 | 115,381,844 | 2 | 0 | 2 | 1 |
| Case 87 | 4 | 115,385,540 | 115,565,659 | 3 | 0 | 3 | 1 |
| Case 87 | 4 | 115,566,754 | 119,865,067 | 2 | 0 | 2 | 1 |
| Case 87 | 4 | 119,867,342 | 119,956,411 | 3 | 0 | 3 | 1 |
| Case 87 | 4 | 119,962,741 | 123,368,516 | 2 | 0 | 2 | 1 |
| Case 87 | 4 | 123,370,387 | 123,581,235 | 3 | 0 | 3 | 1 |
| Case 87 | 4 | 123,582,426 | 126,366,934 | 2 | 0 | 2 | 1 |
| Case 87 | 4 | 126,367,479 | 126,373,858 | 3 | 0 | 3 | 1 |
| Case 87 | 4 | 126,376,877 | 129,214,377 | 2 | 0 | 2 | 1 |
| Case 87 | 4 | 129,217,267 | 129,315,804 | 3 | 0 | 3 | 1 |
| Case 87 | 4 | 129,336,928 | 131,459,940 | 4 | 0 | 4 | 1 |
| Case 87 | 4 | 131,468,686 | 132,024,484 | 3 | 0 | 3 | 1 |
| Case 87 | 4 | 132,031,397 | 133,517,802 | 2 | 2 | 4 | 0 |
| Case 87 | 4 | 133,519,291 | 133,961,722 | 3 | 2 | 5 | 0 |
| Case 87 | 4 | 133,981,517 | 135,798,890 | 2 | 2 | 4 | 0 |
| Case 87 | 4 | 135,803,220 | 137,634,247 | 3 | 2 | 5 | 0 |
| Case 87 | 4 | 137,634,874 | 137,745,250 | 2 | 2 | 4 | 0 |
| Case 87 | 4 | 137,746,765 | 138,366,488 | 3 | 2 | 5 | 0 |
| Case 87 | 4 | 138,367,052 | 138,506,420 | 2 | 2 | 4 | 0 |
| Case 87 | 4 | 138,511,228 | 143,414,537 | 3 | 2 | 5 | 0 |
| Case 87 | 4 | 143,418,354 | 144,480,013 | 2 | 2 | 4 | 0 |
| Case 87 | 4 | 144,480,231 | 147,412,986 | 3 | 2 | 5 | 0 |
| Case 87 | 4 | 147,414,147 | 149,562,638 | 2 | 2 | 4 | 0 |
| Case 87 | 4 | 149,570,069 | 151,199,080 | 3 | 2 | 5 | 0 |
| Case 87 | 4 | 151,199,155 | 152,640,633 | 2 | 2 | 4 | 0 |

|         |   |             |             |   |   |   |   |
|---------|---|-------------|-------------|---|---|---|---|
| Case 87 | 4 | 152,650,882 | 153,669,008 | 3 | 2 | 5 | 0 |
| Case 87 | 4 | 153,669,404 | 153,897,004 | 2 | 2 | 4 | 0 |
| Case 87 | 4 | 153,897,024 | 154,455,240 | 3 | 2 | 5 | 0 |
| Case 87 | 4 | 154,460,415 | 154,703,596 | 2 | 2 | 4 | 0 |
| Case 87 | 4 | 154,706,016 | 155,085,018 | 3 | 2 | 5 | 0 |
| Case 87 | 4 | 155,099,604 | 155,270,460 | 2 | 2 | 4 | 0 |
| Case 87 | 4 | 155,273,743 | 156,138,372 | 3 | 2 | 5 | 0 |
| Case 87 | 4 | 156,139,467 | 157,086,546 | 2 | 2 | 4 | 0 |
| Case 87 | 4 | 157,089,145 | 157,816,206 | 3 | 2 | 5 | 0 |
| Case 87 | 4 | 157,818,132 | 158,715,149 | 2 | 2 | 4 | 0 |
| Case 87 | 4 | 158,715,453 | 159,538,299 | 3 | 2 | 5 | 0 |
| Case 87 | 4 | 159,538,340 | 159,790,159 | 2 | 2 | 4 | 0 |
| Case 87 | 4 | 159,790,198 | 160,719,567 | 3 | 2 | 5 | 0 |
| Case 87 | 4 | 160,736,225 | 161,149,134 | 2 | 2 | 4 | 0 |
| Case 87 | 4 | 161,149,981 | 161,689,479 | 3 | 2 | 5 | 0 |
| Case 87 | 4 | 161,698,345 | 161,795,832 | 2 | 2 | 4 | 0 |
| Case 87 | 4 | 161,799,400 | 161,875,145 | 3 | 0 | 3 | 1 |
| Case 87 | 4 | 161,878,326 | 162,324,909 | 3 | 2 | 5 | 0 |
| Case 87 | 4 | 162,327,265 | 162,927,440 | 2 | 2 | 4 | 0 |
| Case 87 | 4 | 162,930,214 | 167,644,235 | 3 | 2 | 5 | 0 |
| Case 87 | 4 | 167,644,949 | 168,131,137 | 2 | 2 | 4 | 0 |
| Case 87 | 4 | 168,131,448 | 169,141,828 | 3 | 2 | 5 | 0 |
| Case 87 | 4 | 169,141,843 | 169,432,951 | 2 | 2 | 4 | 0 |
| Case 87 | 4 | 169,433,020 | 170,013,910 | 3 | 2 | 5 | 0 |
| Case 87 | 4 | 170,014,786 | 170,740,266 | 2 | 2 | 4 | 0 |
| Case 87 | 4 | 170,754,412 | 172,338,748 | 3 | 2 | 5 | 0 |
| Case 87 | 4 | 172,347,176 | 173,418,304 | 2 | 2 | 4 | 0 |
| Case 87 | 4 | 173,423,366 | 183,655,548 | 2 | 1 | 3 | 0 |
| Case 87 | 4 | 183,655,636 | 183,696,295 | 3 | 1 | 4 | 0 |
| Case 87 | 4 | 183,707,781 | 183,934,142 | 2 | 1 | 3 | 0 |
| Case 87 | 4 | 183,935,289 | 184,190,300 | 2 | 0 | 2 | 1 |
| Case 87 | 4 | 184,192,037 | 184,232,252 | 1 | 0 | 1 | 0 |
| Case 87 | 4 | 184,233,502 | 184,362,046 | 2 | 0 | 2 | 1 |
| Case 87 | 4 | 184,362,068 | 184,639,740 | 1 | 0 | 1 | 0 |
| Case 87 | 4 | 184,641,445 | 185,400,748 | 2 | 0 | 2 | 1 |
| Case 87 | 4 | 185,406,285 | 185,412,322 | 1 | 0 | 1 | 0 |
| Case 87 | 4 | 185,424,289 | 186,467,810 | 2 | 1 | 3 | 0 |
| Case 87 | 4 | 186,468,992 | 186,515,050 | 2 | 0 | 2 | 1 |
| Case 87 | 4 | 186,518,902 | 186,537,232 | 1 | 0 | 1 | 0 |
| Case 87 | 4 | 186,540,503 | 186,642,895 | 2 | 0 | 2 | 1 |
| Case 87 | 4 | 186,644,607 | 186,796,912 | 1 | 0 | 1 | 0 |
| Case 87 | 4 | 186,799,239 | 187,005,049 | 2 | 0 | 2 | 1 |
| Case 87 | 4 | 187,005,064 | 187,084,086 | 1 | 0 | 1 | 0 |
| Case 87 | 4 | 187,084,634 | 187,539,205 | 2 | 0 | 2 | 1 |
| Case 87 | 4 | 187,539,216 | 187,542,152 | 3 | 0 | 3 | 1 |
| Case 87 | 4 | 187,542,201 | 187,754,871 | 2 | 0 | 2 | 1 |
| Case 87 | 4 | 187,756,317 | 187,817,303 | 1 | 0 | 1 | 0 |
| Case 87 | 4 | 187,818,100 | 187,903,476 | 2 | 0 | 2 | 1 |
| Case 87 | 4 | 187,906,366 | 187,946,831 | 1 | 0 | 1 | 0 |
| Case 87 | 4 | 187,949,161 | 188,294,980 | 2 | 0 | 2 | 1 |
| Case 87 | 4 | 188,295,836 | 188,406,503 | 1 | 0 | 1 | 0 |
| Case 87 | 4 | 188,411,479 | 188,645,813 | 2 | 0 | 2 | 1 |
| Case 87 | 4 | 188,646,845 | 188,894,402 | 1 | 0 | 1 | 0 |
| Case 87 | 4 | 188,898,937 | 189,402,769 | 2 | 0 | 2 | 1 |
| Case 87 | 4 | 189,404,004 | 189,430,792 | 1 | 0 | 1 | 0 |
| Case 87 | 4 | 189,433,290 | 189,541,446 | 2 | 0 | 2 | 1 |
| Case 87 | 4 | 189,542,277 | 190,008,681 | 1 | 0 | 1 | 0 |
| Case 87 | 4 | 190,010,270 | 190,065,197 | 2 | 0 | 2 | 1 |
| Case 87 | 4 | 190,066,616 | 190,151,383 | 1 | 0 | 1 | 0 |
| Case 87 | 4 | 190,158,729 | 190,872,778 | 2 | 0 | 2 | 1 |
| Case 87 | 4 | 190,876,192 | 190,963,766 | 3 | 0 | 3 | 1 |

|         |   |            |            |   |   |   |   |
|---------|---|------------|------------|---|---|---|---|
| Case 87 | 5 | 38,139     | 886,744    | 2 | 2 | 4 | 0 |
| Case 87 | 5 | 891,839    | 1,200,573  | 3 | 2 | 5 | 0 |
| Case 87 | 5 | 1,200,882  | 1,550,942  | 2 | 2 | 4 | 0 |
| Case 87 | 5 | 1,552,714  | 5,418,792  | 3 | 2 | 5 | 0 |
| Case 87 | 5 | 5,419,547  | 5,539,266  | 2 | 2 | 4 | 0 |
| Case 87 | 5 | 5,546,157  | 7,867,115  | 3 | 2 | 5 | 0 |
| Case 87 | 5 | 7,867,353  | 7,919,212  | 2 | 2 | 4 | 0 |
| Case 87 | 5 | 7,920,843  | 10,226,839 | 3 | 2 | 5 | 0 |
| Case 87 | 5 | 10,227,548 | 10,450,146 | 2 | 2 | 4 | 0 |
| Case 87 | 5 | 10,451,154 | 12,543,792 | 3 | 2 | 5 | 0 |
| Case 87 | 5 | 12,550,857 | 12,566,885 | 2 | 2 | 4 | 0 |
| Case 87 | 5 | 12,572,670 | 13,545,172 | 6 | 1 | 7 | 0 |
| Case 87 | 5 | 13,572,053 | 13,931,340 | 3 | 2 | 5 | 0 |
| Case 87 | 5 | 13,933,125 | 14,116,396 | 4 | 2 | 6 | 0 |
| Case 87 | 5 | 14,116,980 | 16,820,769 | 3 | 2 | 5 | 0 |
| Case 87 | 5 | 16,834,274 | 17,415,197 | 3 | 0 | 3 | 1 |
| Case 87 | 5 | 17,418,256 | 31,061,575 | 2 | 0 | 2 | 1 |
| Case 87 | 5 | 31,063,153 | 32,327,326 | 3 | 0 | 3 | 1 |
| Case 87 | 5 | 32,331,324 | 32,462,753 | 2 | 0 | 2 | 1 |
| Case 87 | 5 | 32,462,868 | 32,991,719 | 3 | 0 | 3 | 1 |
| Case 87 | 5 | 33,003,280 | 33,497,319 | 2 | 0 | 2 | 1 |
| Case 87 | 5 | 33,500,988 | 34,166,261 | 3 | 0 | 3 | 1 |
| Case 87 | 5 | 34,180,455 | 34,558,730 | 3 | 2 | 5 | 0 |
| Case 87 | 5 | 34,559,175 | 34,753,340 | 4 | 2 | 6 | 0 |
| Case 87 | 5 | 34,754,248 | 36,398,377 | 3 | 2 | 5 | 0 |
| Case 87 | 5 | 36,400,787 | 36,703,653 | 4 | 2 | 6 | 0 |
| Case 87 | 5 | 36,709,244 | 37,182,862 | 3 | 2 | 5 | 0 |
| Case 87 | 5 | 37,182,902 | 38,946,608 | 5 | 1 | 6 | 0 |
| Case 87 | 5 | 38,950,028 | 38,952,459 | 3 | 1 | 4 | 0 |
| Case 87 | 5 | 38,952,527 | 42,019,110 | 2 | 2 | 4 | 0 |
| Case 87 | 5 | 42,038,122 | 42,800,967 | 2 | 0 | 2 | 1 |
| Case 87 | 5 | 42,801,028 | 43,280,480 | 3 | 0 | 3 | 1 |
| Case 87 | 5 | 43,280,482 | 45,988,948 | 2 | 0 | 2 | 1 |
| Case 87 | 5 | 45,996,902 | 46,399,093 | 1 | 0 | 1 | 0 |
| Case 87 | 5 | 49,457,282 | 49,522,346 | 1 | 0 | 1 | 0 |
| Case 87 | 5 | 49,564,798 | 58,511,501 | 3 | 0 | 3 | 1 |
| Case 87 | 5 | 58,515,481 | 60,238,590 | 2 | 0 | 2 | 1 |
| Case 87 | 5 | 60,241,826 | 60,858,543 | 3 | 0 | 3 | 1 |
| Case 87 | 5 | 60,859,416 | 61,165,960 | 4 | 0 | 4 | 1 |
| Case 87 | 5 | 61,171,312 | 61,967,808 | 3 | 0 | 3 | 1 |
| Case 87 | 5 | 61,977,629 | 62,094,462 | 5 | 0 | 5 | 1 |
| Case 87 | 5 | 62,101,475 | 66,280,426 | 3 | 0 | 3 | 1 |
| Case 87 | 5 | 66,284,699 | 66,460,352 | 2 | 0 | 2 | 1 |
| Case 87 | 5 | 66,460,390 | 66,663,691 | 3 | 0 | 3 | 1 |
| Case 87 | 5 | 66,670,452 | 67,432,791 | 2 | 0 | 2 | 1 |
| Case 87 | 5 | 67,432,828 | 68,335,741 | 3 | 0 | 3 | 1 |
| Case 87 | 5 | 68,337,426 | 68,715,249 | 2 | 0 | 2 | 1 |
| Case 87 | 5 | 68,715,310 | 70,308,554 | 3 | 0 | 3 | 1 |
| Case 87 | 5 | 70,704,077 | 70,860,663 | 2 | 0 | 2 | 1 |
| Case 87 | 5 | 70,862,059 | 71,908,620 | 3 | 0 | 3 | 1 |
| Case 87 | 5 | 71,914,988 | 72,408,246 | 2 | 0 | 2 | 1 |
| Case 87 | 5 | 72,408,589 | 72,861,455 | 3 | 0 | 3 | 1 |
| Case 87 | 5 | 72,862,289 | 73,099,158 | 2 | 0 | 2 | 1 |
| Case 87 | 5 | 73,104,710 | 73,135,485 | 3 | 0 | 3 | 1 |
| Case 87 | 5 | 73,136,428 | 73,215,282 | 2 | 0 | 2 | 1 |
| Case 87 | 5 | 73,215,462 | 73,981,299 | 3 | 0 | 3 | 1 |
| Case 87 | 5 | 73,982,965 | 74,169,045 | 2 | 0 | 2 | 1 |
| Case 87 | 5 | 74,172,468 | 74,371,635 | 3 | 0 | 3 | 1 |
| Case 87 | 5 | 74,376,571 | 75,008,702 | 2 | 0 | 2 | 1 |
| Case 87 | 5 | 75,014,916 | 75,866,423 | 3 | 0 | 3 | 1 |
| Case 87 | 5 | 75,869,228 | 75,913,366 | 2 | 0 | 2 | 1 |

|         |   |             |             |   |   |   |   |
|---------|---|-------------|-------------|---|---|---|---|
| Case 87 | 5 | 75,913,784  | 75,962,386  | 3 | 0 | 3 | 1 |
| Case 87 | 5 | 75,963,210  | 76,004,933  | 2 | 0 | 2 | 1 |
| Case 87 | 5 | 76,006,172  | 76,232,818  | 3 | 0 | 3 | 1 |
| Case 87 | 5 | 76,233,170  | 76,349,814  | 2 | 0 | 2 | 1 |
| Case 87 | 5 | 76,349,847  | 76,736,742  | 3 | 0 | 3 | 1 |
| Case 87 | 5 | 76,736,793  | 76,789,265  | 2 | 0 | 2 | 1 |
| Case 87 | 5 | 76,803,523  | 77,290,512  | 3 | 0 | 3 | 1 |
| Case 87 | 5 | 77,290,902  | 77,784,438  | 2 | 0 | 2 | 1 |
| Case 87 | 5 | 77,784,542  | 78,593,897  | 3 | 0 | 3 | 1 |
| Case 87 | 5 | 78,595,988  | 78,641,327  | 4 | 0 | 4 | 1 |
| Case 87 | 5 | 78,660,354  | 79,017,377  | 2 | 0 | 2 | 1 |
| Case 87 | 5 | 79,024,734  | 79,027,494  | 3 | 0 | 3 | 1 |
| Case 87 | 5 | 79,027,605  | 79,033,391  | 2 | 0 | 2 | 1 |
| Case 87 | 5 | 79,033,460  | 79,160,486  | 3 | 0 | 3 | 1 |
| Case 87 | 5 | 79,161,503  | 79,329,756  | 2 | 0 | 2 | 1 |
| Case 87 | 5 | 79,330,559  | 79,549,684  | 3 | 0 | 3 | 1 |
| Case 87 | 5 | 79,564,658  | 79,852,478  | 2 | 0 | 2 | 1 |
| Case 87 | 5 | 79,854,441  | 79,957,737  | 3 | 0 | 3 | 1 |
| Case 87 | 5 | 79,957,835  | 80,203,678  | 2 | 0 | 2 | 1 |
| Case 87 | 5 | 80,206,473  | 80,655,266  | 3 | 0 | 3 | 1 |
| Case 87 | 5 | 80,655,709  | 80,876,359  | 2 | 0 | 2 | 1 |
| Case 87 | 5 | 80,883,110  | 81,056,637  | 1 | 0 | 1 | 0 |
| Case 87 | 5 | 81,057,282  | 81,260,121  | 2 | 0 | 2 | 1 |
| Case 87 | 5 | 81,264,006  | 81,608,444  | 1 | 0 | 1 | 0 |
| Case 87 | 5 | 81,608,503  | 81,674,497  | 2 | 0 | 2 | 1 |
| Case 87 | 5 | 81,679,759  | 81,939,371  | 1 | 0 | 1 | 0 |
| Case 87 | 5 | 81,944,343  | 81,979,166  | 2 | 0 | 2 | 1 |
| Case 87 | 5 | 81,983,638  | 82,068,106  | 1 | 0 | 1 | 0 |
| Case 87 | 5 | 82,070,143  | 82,171,190  | 2 | 0 | 2 | 1 |
| Case 87 | 5 | 82,171,406  | 82,815,252  | 1 | 0 | 1 | 0 |
| Case 87 | 5 | 82,815,317  | 82,826,483  | 2 | 0 | 2 | 1 |
| Case 87 | 5 | 82,826,722  | 82,833,465  | 1 | 0 | 1 | 0 |
| Case 87 | 5 | 82,833,584  | 82,858,828  | 2 | 0 | 2 | 1 |
| Case 87 | 5 | 82,859,485  | 87,493,525  | 1 | 0 | 1 | 0 |
| Case 87 | 5 | 87,495,504  | 87,596,675  | 2 | 0 | 2 | 1 |
| Case 87 | 5 | 87,663,610  | 89,979,980  | 1 | 0 | 1 | 0 |
| Case 87 | 5 | 89,981,611  | 89,990,447  | 2 | 0 | 2 | 1 |
| Case 87 | 5 | 89,994,983  | 90,388,305  | 1 | 0 | 1 | 0 |
| Case 87 | 5 | 90,398,074  | 90,493,653  | 2 | 0 | 2 | 1 |
| Case 87 | 5 | 90,494,075  | 93,713,546  | 1 | 0 | 1 | 0 |
| Case 87 | 5 | 93,722,004  | 93,751,943  | 2 | 0 | 2 | 1 |
| Case 87 | 5 | 93,753,017  | 94,743,198  | 1 | 0 | 1 | 0 |
| Case 87 | 5 | 94,744,042  | 94,772,572  | 2 | 0 | 2 | 1 |
| Case 87 | 5 | 94,772,576  | 95,122,000  | 1 | 0 | 1 | 0 |
| Case 87 | 5 | 95,124,328  | 95,234,350  | 2 | 0 | 2 | 1 |
| Case 87 | 5 | 95,234,485  | 95,709,132  | 1 | 0 | 1 | 0 |
| Case 87 | 5 | 95,715,456  | 96,094,694  | 2 | 0 | 2 | 1 |
| Case 87 | 5 | 96,094,973  | 96,119,739  | 1 | 0 | 1 | 0 |
| Case 87 | 5 | 96,119,785  | 96,174,929  | 2 | 0 | 2 | 1 |
| Case 87 | 5 | 96,175,043  | 96,375,671  | 1 | 0 | 1 | 0 |
| Case 87 | 5 | 96,379,169  | 96,478,219  | 2 | 0 | 2 | 1 |
| Case 87 | 5 | 96,481,475  | 97,402,967  | 1 | 0 | 1 | 0 |
| Case 87 | 5 | 97,406,001  | 97,492,717  | 2 | 0 | 2 | 1 |
| Case 87 | 5 | 97,497,429  | 99,342,047  | 1 | 0 | 1 | 0 |
| Case 87 | 5 | 99,346,521  | 99,434,080  | 2 | 0 | 2 | 1 |
| Case 87 | 5 | 99,451,233  | 106,690,481 | 1 | 0 | 1 | 0 |
| Case 87 | 5 | 106,697,023 | 106,734,026 | 2 | 0 | 2 | 1 |
| Case 87 | 5 | 106,736,357 | 107,195,824 | 1 | 0 | 1 | 0 |
| Case 87 | 5 | 107,196,976 | 107,220,280 | 2 | 0 | 2 | 1 |
| Case 87 | 5 | 107,222,076 | 108,521,910 | 1 | 0 | 1 | 0 |
| Case 87 | 5 | 108,521,939 | 108,664,929 | 2 | 0 | 2 | 1 |



|         |   |             |             |   |   |   |   |
|---------|---|-------------|-------------|---|---|---|---|
| Case 87 | 5 | 108,670,421 | 108,932,563 | 1 | 0 | 1 | 0 |
| Case 87 | 5 | 108,937,292 | 109,049,221 | 2 | 0 | 2 | 1 |
| Case 87 | 5 | 109,049,233 | 110,853,126 | 1 | 0 | 1 | 0 |
| Case 87 | 5 | 110,855,952 | 110,925,663 | 2 | 0 | 2 | 1 |
| Case 87 | 5 | 110,930,883 | 111,444,522 | 1 | 0 | 1 | 0 |
| Case 87 | 5 | 111,445,356 | 111,544,856 | 2 | 0 | 2 | 1 |
| Case 87 | 5 | 111,545,048 | 111,699,317 | 1 | 0 | 1 | 0 |
| Case 87 | 5 | 111,701,910 | 111,820,871 | 2 | 0 | 2 | 1 |
| Case 87 | 5 | 111,822,058 | 111,848,890 | 1 | 0 | 1 | 0 |
| Case 87 | 5 | 111,870,042 | 112,007,180 | 2 | 0 | 2 | 1 |
| Case 87 | 5 | 112,008,440 | 112,175,240 | 1 | 0 | 1 | 0 |
| Case 87 | 5 | 112,175,363 | 112,824,045 | 2 | 0 | 2 | 1 |
| Case 87 | 5 | 112,825,032 | 112,979,910 | 1 | 0 | 1 | 0 |
| Case 87 | 5 | 112,981,528 | 113,044,903 | 2 | 0 | 2 | 1 |
| Case 87 | 5 | 113,053,253 | 113,342,732 | 1 | 0 | 1 | 0 |
| Case 87 | 5 | 113,343,004 | 113,489,499 | 2 | 0 | 2 | 1 |
| Case 87 | 5 | 113,503,422 | 114,279,914 | 1 | 0 | 1 | 0 |
| Case 87 | 5 | 114,283,042 | 114,434,126 | 2 | 0 | 2 | 1 |
| Case 87 | 5 | 114,451,513 | 114,700,699 | 1 | 0 | 1 | 0 |
| Case 87 | 5 | 114,702,503 | 114,819,995 | 2 | 0 | 2 | 1 |
| Case 87 | 5 | 114,821,140 | 115,238,589 | 1 | 0 | 1 | 0 |
| Case 87 | 5 | 115,242,142 | 115,336,215 | 2 | 0 | 2 | 1 |
| Case 87 | 5 | 115,336,353 | 115,693,166 | 1 | 0 | 1 | 0 |
| Case 87 | 5 | 115,695,077 | 115,961,967 | 2 | 0 | 2 | 1 |
| Case 87 | 5 | 115,966,256 | 117,011,725 | 1 | 0 | 1 | 0 |
| Case 87 | 5 | 117,012,266 | 117,225,247 | 2 | 0 | 2 | 1 |
| Case 87 | 5 | 117,227,611 | 117,772,695 | 1 | 0 | 1 | 0 |
| Case 87 | 5 | 117,783,134 | 117,976,258 | 2 | 0 | 2 | 1 |
| Case 87 | 5 | 117,981,154 | 118,589,485 | 1 | 0 | 1 | 0 |
| Case 87 | 5 | 118,597,487 | 118,728,816 | 2 | 0 | 2 | 1 |
| Case 87 | 5 | 118,729,068 | 118,963,199 | 1 | 0 | 1 | 0 |
| Case 87 | 5 | 118,964,509 | 118,996,115 | 2 | 0 | 2 | 1 |
| Case 87 | 5 | 119,002,347 | 120,020,074 | 1 | 0 | 1 | 0 |
| Case 87 | 5 | 120,021,817 | 120,022,105 | 2 | 1 | 3 | 0 |
| Case 87 | 5 | 120,022,309 | 120,123,994 | 1 | 0 | 1 | 0 |
| Case 87 | 5 | 120,140,600 | 120,198,311 | 2 | 0 | 2 | 1 |
| Case 87 | 5 | 120,207,152 | 121,186,463 | 1 | 0 | 1 | 0 |
| Case 87 | 5 | 121,188,004 | 121,212,154 | 2 | 0 | 2 | 1 |
| Case 87 | 5 | 121,212,760 | 121,487,765 | 1 | 0 | 1 | 0 |
| Case 87 | 5 | 121,487,789 | 121,907,730 | 2 | 0 | 2 | 1 |
| Case 87 | 5 | 121,907,799 | 121,990,722 | 1 | 0 | 1 | 0 |
| Case 87 | 5 | 121,991,807 | 122,109,923 | 2 | 0 | 2 | 1 |
| Case 87 | 5 | 122,132,725 | 122,402,675 | 1 | 0 | 1 | 0 |
| Case 87 | 5 | 122,405,090 | 122,614,010 | 2 | 0 | 2 | 1 |
| Case 87 | 5 | 122,617,574 | 123,594,293 | 1 | 0 | 1 | 0 |
| Case 87 | 5 | 123,596,603 | 123,914,126 | 2 | 0 | 2 | 1 |
| Case 87 | 5 | 123,915,337 | 123,962,891 | 1 | 0 | 1 | 0 |
| Case 87 | 5 | 123,964,252 | 124,217,262 | 2 | 0 | 2 | 1 |
| Case 87 | 5 | 124,222,305 | 124,378,785 | 1 | 0 | 1 | 0 |
| Case 87 | 5 | 124,386,991 | 124,491,386 | 2 | 0 | 2 | 1 |
| Case 87 | 5 | 124,491,958 | 124,875,058 | 1 | 0 | 1 | 0 |
| Case 87 | 5 | 124,877,035 | 124,914,520 | 2 | 0 | 2 | 1 |
| Case 87 | 5 | 124,916,977 | 125,696,118 | 1 | 0 | 1 | 0 |
| Case 87 | 5 | 125,696,124 | 125,845,095 | 2 | 0 | 2 | 1 |
| Case 87 | 5 | 125,859,181 | 125,886,071 | 1 | 0 | 1 | 0 |
| Case 87 | 5 | 125,887,496 | 126,446,364 | 2 | 0 | 2 | 1 |
| Case 87 | 5 | 126,449,259 | 126,619,008 | 1 | 0 | 1 | 0 |
| Case 87 | 5 | 126,625,548 | 126,860,426 | 2 | 0 | 2 | 1 |
| Case 87 | 5 | 126,860,492 | 127,557,814 | 1 | 0 | 1 | 0 |
| Case 87 | 5 | 127,562,880 | 127,692,991 | 2 | 0 | 2 | 1 |
| Case 87 | 5 | 127,694,805 | 127,850,855 | 1 | 0 | 1 | 0 |

|         |   |             |             |   |   |   |   |
|---------|---|-------------|-------------|---|---|---|---|
| Case 87 | 5 | 127,856,474 | 127,932,658 | 2 | 0 | 2 | 1 |
| Case 87 | 5 | 127,962,504 | 128,291,364 | 1 | 0 | 1 | 0 |
| Case 87 | 5 | 128,298,437 | 128,302,288 | 2 | 0 | 2 | 1 |
| Case 87 | 5 | 128,302,850 | 131,296,236 | 1 | 0 | 1 | 0 |
| Case 87 | 5 | 131,302,110 | 131,911,535 | 2 | 0 | 2 | 1 |
| Case 87 | 5 | 131,915,022 | 131,970,885 | 1 | 0 | 1 | 0 |
| Case 87 | 5 | 131,972,872 | 132,009,785 | 2 | 0 | 2 | 1 |
| Case 87 | 5 | 132,009,787 | 132,069,739 | 1 | 0 | 1 | 0 |
| Case 87 | 5 | 132,070,103 | 133,482,348 | 2 | 0 | 2 | 1 |
| Case 87 | 5 | 133,486,263 | 133,702,282 | 1 | 0 | 1 | 0 |
| Case 87 | 5 | 133,702,856 | 133,930,528 | 2 | 0 | 2 | 1 |
| Case 87 | 5 | 133,942,478 | 134,199,105 | 1 | 0 | 1 | 0 |
| Case 87 | 5 | 134,210,597 | 134,406,317 | 2 | 0 | 2 | 1 |
| Case 87 | 5 | 134,431,163 | 137,179,924 | 4 | 0 | 4 | 1 |
| Case 87 | 5 | 137,194,762 | 137,488,340 | 3 | 0 | 3 | 1 |
| Case 87 | 5 | 137,488,440 | 139,751,899 | 4 | 0 | 4 | 1 |
| Case 87 | 5 | 139,751,914 | 139,931,620 | 3 | 0 | 3 | 1 |
| Case 87 | 5 | 139,931,629 | 139,931,644 | 0 | 0 | 0 | 0 |
| Case 87 | 5 | 139,931,646 | 139,931,740 | 2 | 0 | 2 | 1 |
| Case 87 | 5 | 139,936,760 | 142,662,923 | 4 | 0 | 4 | 1 |
| Case 87 | 5 | 142,663,416 | 142,780,212 | 3 | 0 | 3 | 1 |
| Case 87 | 5 | 142,780,317 | 147,360,904 | 4 | 0 | 4 | 1 |
| Case 87 | 5 | 147,363,251 | 147,676,149 | 3 | 0 | 3 | 1 |
| Case 87 | 5 | 147,685,952 | 151,939,650 | 4 | 0 | 4 | 1 |
| Case 87 | 5 | 151,939,905 | 152,857,519 | 3 | 0 | 3 | 1 |
| Case 87 | 5 | 152,861,509 | 154,254,818 | 4 | 0 | 4 | 1 |
| Case 87 | 5 | 154,254,886 | 154,395,458 | 3 | 0 | 3 | 1 |
| Case 87 | 5 | 154,395,470 | 161,681,172 | 4 | 0 | 4 | 1 |
| Case 87 | 5 | 161,684,398 | 162,409,703 | 3 | 0 | 3 | 1 |
| Case 87 | 5 | 162,411,692 | 162,866,548 | 4 | 0 | 4 | 1 |
| Case 87 | 5 | 162,867,195 | 162,989,613 | 3 | 0 | 3 | 1 |
| Case 87 | 5 | 162,989,974 | 163,954,210 | 4 | 0 | 4 | 1 |
| Case 87 | 5 | 163,957,570 | 166,416,988 | 3 | 0 | 3 | 1 |
| Case 87 | 5 | 166,417,375 | 168,845,858 | 4 | 0 | 4 | 1 |
| Case 87 | 5 | 168,847,968 | 169,068,382 | 3 | 0 | 3 | 1 |
| Case 87 | 5 | 169,074,056 | 169,081,315 | 2 | 0 | 2 | 1 |
| Case 87 | 5 | 169,093,679 | 170,282,686 | 4 | 0 | 4 | 1 |
| Case 87 | 5 | 170,283,091 | 170,714,609 | 3 | 0 | 3 | 1 |
| Case 87 | 5 | 170,720,930 | 174,915,691 | 4 | 0 | 4 | 1 |
| Case 87 | 5 | 174,916,655 | 174,965,974 | 3 | 0 | 3 | 1 |
| Case 87 | 5 | 174,966,057 | 178,299,188 | 4 | 0 | 4 | 1 |
| Case 87 | 5 | 178,300,191 | 178,405,251 | 3 | 0 | 3 | 1 |
| Case 87 | 5 | 178,405,729 | 180,693,127 | 4 | 0 | 4 | 1 |
| Case 87 | 6 | 108,666     | 11,424,279  | 3 | 2 | 5 | 0 |
| Case 87 | 6 | 11,429,737  | 11,658,019  | 4 | 2 | 6 | 0 |
| Case 87 | 6 | 11,658,168  | 22,734,908  | 3 | 2 | 5 | 0 |
| Case 87 | 6 | 22,735,375  | 23,358,040  | 4 | 2 | 6 | 0 |
| Case 87 | 6 | 23,366,140  | 25,152,674  | 3 | 2 | 5 | 0 |
| Case 87 | 6 | 25,156,061  | 25,328,153  | 4 | 2 | 6 | 0 |
| Case 87 | 6 | 25,328,567  | 26,598,572  | 3 | 2 | 5 | 0 |
| Case 87 | 6 | 26,599,043  | 27,104,783  | 4 | 2 | 6 | 0 |
| Case 87 | 6 | 27,107,865  | 28,146,674  | 3 | 2 | 5 | 0 |
| Case 87 | 6 | 28,147,987  | 28,189,389  | 4 | 2 | 6 | 0 |
| Case 87 | 6 | 28,191,057  | 29,915,268  | 3 | 2 | 5 | 0 |
| Case 87 | 6 | 29,915,301  | 29,917,591  | 3 | 0 | 3 | 1 |
| Case 87 | 6 | 29,917,610  | 30,057,985  | 5 | 0 | 5 | 1 |
| Case 87 | 6 | 30,058,988  | 30,794,617  | 3 | 2 | 5 | 0 |
| Case 87 | 6 | 30,796,271  | 30,838,497  | 4 | 2 | 6 | 0 |
| Case 87 | 6 | 30,838,688  | 30,993,958  | 3 | 2 | 5 | 0 |
| Case 87 | 6 | 30,994,163  | 30,994,778  | 2 | 0 | 2 | 1 |
| Case 87 | 6 | 30,995,078  | 31,261,276  | 3 | 2 | 5 | 0 |

|         |   |             |             |   |   |   |   |
|---------|---|-------------|-------------|---|---|---|---|
| Case 87 | 6 | 31,262,169  | 31,319,281  | 4 | 2 | 6 | 0 |
| Case 87 | 6 | 31,319,355  | 32,637,994  | 3 | 2 | 5 | 0 |
| Case 87 | 6 | 32,640,336  | 32,682,812  | 4 | 2 | 6 | 0 |
| Case 87 | 6 | 32,682,862  | 36,658,742  | 3 | 2 | 5 | 0 |
| Case 87 | 6 | 36,660,453  | 36,708,556  | 4 | 2 | 6 | 0 |
| Case 87 | 6 | 36,708,821  | 45,520,719  | 3 | 2 | 5 | 0 |
| Case 87 | 6 | 45,521,449  | 45,806,448  | 4 | 2 | 6 | 0 |
| Case 87 | 6 | 45,808,357  | 46,996,478  | 3 | 2 | 5 | 0 |
| Case 87 | 6 | 46,996,760  | 47,364,957  | 4 | 2 | 6 | 0 |
| Case 87 | 6 | 47,369,202  | 50,070,607  | 3 | 2 | 5 | 0 |
| Case 87 | 6 | 50,077,707  | 50,415,303  | 4 | 2 | 6 | 0 |
| Case 87 | 6 | 50,421,623  | 51,171,408  | 3 | 2 | 5 | 0 |
| Case 87 | 6 | 51,171,829  | 51,601,124  | 4 | 2 | 6 | 0 |
| Case 87 | 6 | 51,609,303  | 53,447,934  | 3 | 2 | 5 | 0 |
| Case 87 | 6 | 53,448,040  | 53,515,130  | 4 | 2 | 6 | 0 |
| Case 87 | 6 | 53,515,483  | 53,690,779  | 3 | 2 | 5 | 0 |
| Case 87 | 6 | 53,693,655  | 53,971,401  | 4 | 2 | 6 | 0 |
| Case 87 | 6 | 53,975,913  | 54,274,783  | 3 | 2 | 5 | 0 |
| Case 87 | 6 | 54,278,274  | 54,580,022  | 4 | 2 | 6 | 0 |
| Case 87 | 6 | 54,580,930  | 58,752,089  | 3 | 2 | 5 | 0 |
| Case 87 | 6 | 61,891,118  | 63,228,933  | 3 | 2 | 5 | 0 |
| Case 87 | 6 | 63,231,367  | 64,240,516  | 4 | 2 | 6 | 0 |
| Case 87 | 6 | 64,249,883  | 65,317,295  | 3 | 2 | 5 | 0 |
| Case 87 | 6 | 65,318,362  | 67,403,398  | 4 | 2 | 6 | 0 |
| Case 87 | 6 | 67,403,591  | 67,649,216  | 3 | 2 | 5 | 0 |
| Case 87 | 6 | 67,650,186  | 68,014,487  | 4 | 2 | 6 | 0 |
| Case 87 | 6 | 68,024,278  | 71,367,566  | 3 | 2 | 5 | 0 |
| Case 87 | 6 | 71,377,781  | 71,731,535  | 4 | 2 | 6 | 0 |
| Case 87 | 6 | 71,732,242  | 72,384,595  | 3 | 2 | 5 | 0 |
| Case 87 | 6 | 72,385,311  | 72,825,419  | 4 | 2 | 6 | 0 |
| Case 87 | 6 | 72,845,455  | 73,524,224  | 3 | 2 | 5 | 0 |
| Case 87 | 6 | 73,525,349  | 73,904,256  | 4 | 2 | 6 | 0 |
| Case 87 | 6 | 73,904,346  | 74,675,686  | 3 | 2 | 5 | 0 |
| Case 87 | 6 | 74,675,731  | 75,461,769  | 4 | 2 | 6 | 0 |
| Case 87 | 6 | 75,462,448  | 77,825,472  | 3 | 2 | 5 | 0 |
| Case 87 | 6 | 77,852,276  | 80,195,421  | 4 | 2 | 6 | 0 |
| Case 87 | 6 | 80,196,789  | 81,429,073  | 3 | 2 | 5 | 0 |
| Case 87 | 6 | 81,432,886  | 82,496,625  | 4 | 2 | 6 | 0 |
| Case 87 | 6 | 82,497,480  | 82,943,878  | 5 | 1 | 6 | 0 |
| Case 87 | 6 | 82,950,189  | 82,958,246  | 3 | 1 | 4 | 0 |
| Case 87 | 6 | 82,973,801  | 83,311,136  | 3 | 2 | 5 | 0 |
| Case 87 | 6 | 83,316,216  | 83,576,815  | 4 | 2 | 6 | 0 |
| Case 87 | 6 | 83,580,759  | 85,469,998  | 3 | 2 | 5 | 0 |
| Case 87 | 6 | 85,471,464  | 86,178,324  | 4 | 2 | 6 | 0 |
| Case 87 | 6 | 86,180,732  | 91,106,000  | 3 | 2 | 5 | 0 |
| Case 87 | 6 | 91,107,018  | 91,698,265  | 4 | 2 | 6 | 0 |
| Case 87 | 6 | 91,701,396  | 92,730,285  | 3 | 2 | 5 | 0 |
| Case 87 | 6 | 92,749,256  | 93,858,168  | 4 | 2 | 6 | 0 |
| Case 87 | 6 | 93,859,226  | 94,403,778  | 3 | 2 | 5 | 0 |
| Case 87 | 6 | 94,405,162  | 95,188,273  | 4 | 2 | 6 | 0 |
| Case 87 | 6 | 95,197,882  | 96,070,254  | 3 | 2 | 5 | 0 |
| Case 87 | 6 | 96,077,028  | 96,599,728  | 4 | 2 | 6 | 0 |
| Case 87 | 6 | 96,606,573  | 100,574,090 | 3 | 2 | 5 | 0 |
| Case 87 | 6 | 100,575,272 | 100,827,834 | 4 | 2 | 6 | 0 |
| Case 87 | 6 | 100,829,135 | 101,953,217 | 3 | 2 | 5 | 0 |
| Case 87 | 6 | 101,957,291 | 103,376,636 | 4 | 2 | 6 | 0 |
| Case 87 | 6 | 103,379,859 | 104,136,200 | 3 | 2 | 5 | 0 |
| Case 87 | 6 | 104,151,513 | 104,513,200 | 4 | 2 | 6 | 0 |
| Case 87 | 6 | 104,515,333 | 106,051,738 | 3 | 2 | 5 | 0 |
| Case 87 | 6 | 106,057,283 | 106,329,966 | 4 | 2 | 6 | 0 |
| Case 87 | 6 | 106,330,503 | 108,009,760 | 3 | 2 | 5 | 0 |

|         |   |             |             |   |   |   |   |
|---------|---|-------------|-------------|---|---|---|---|
| Case 87 | 6 | 108,010,389 | 108,415,392 | 4 | 2 | 6 | 0 |
| Case 87 | 6 | 108,427,424 | 112,536,990 | 3 | 2 | 5 | 0 |
| Case 87 | 6 | 112,537,586 | 113,140,908 | 4 | 2 | 6 | 0 |
| Case 87 | 6 | 113,146,769 | 113,398,162 | 3 | 2 | 5 | 0 |
| Case 87 | 6 | 113,401,094 | 114,092,964 | 4 | 2 | 6 | 0 |
| Case 87 | 6 | 114,099,625 | 117,882,209 | 3 | 2 | 5 | 0 |
| Case 87 | 6 | 117,884,448 | 144,812,192 | 2 | 2 | 4 | 0 |
| Case 87 | 6 | 144,814,016 | 145,021,251 | 3 | 0 | 3 | 1 |
| Case 87 | 6 | 145,025,611 | 170,980,171 | 2 | 2 | 4 | 0 |
| Case 87 | 7 | 44,935      | 8,606,260   | 6 | 0 | 6 | 1 |
| Case 87 | 7 | 8,615,445   | 8,633,143   | 6 | 1 | 7 | 0 |
| Case 87 | 7 | 8,633,637   | 20,180,717  | 7 | 0 | 7 | 1 |
| Case 87 | 7 | 20,180,736  | 20,180,736  | 2 | 0 | 2 | 1 |
| Case 87 | 7 | 20,180,760  | 20,180,760  | 4 | 0 | 4 | 1 |
| Case 87 | 7 | 20,180,780  | 20,180,780  | 5 | 0 | 5 | 1 |
| Case 87 | 7 | 20,182,020  | 41,899,191  | 6 | 0 | 6 | 1 |
| Case 87 | 7 | 41,907,182  | 41,907,182  | 6 | 1 | 7 | 0 |
| Case 87 | 7 | 41,911,549  | 41,989,780  | 7 | 0 | 7 | 1 |
| Case 87 | 7 | 41,993,594  | 42,005,073  | 0 | 0 | 0 | 0 |
| Case 87 | 7 | 42,005,522  | 42,015,020  | 2 | 0 | 2 | 1 |
| Case 87 | 7 | 42,017,972  | 42,108,145  | 1 | 0 | 1 | 0 |
| Case 87 | 7 | 42,112,533  | 42,112,533  | 4 | 0 | 4 | 1 |
| Case 87 | 7 | 42,113,146  | 42,118,825  | 5 | 0 | 5 | 1 |
| Case 87 | 7 | 42,121,553  | 53,983,352  | 6 | 0 | 6 | 1 |
| Case 87 | 7 | 53,993,722  | 58,019,061  | 5 | 1 | 6 | 0 |
| Case 87 | 7 | 61,056,053  | 61,747,794  | 5 | 1 | 6 | 0 |
| Case 87 | 7 | 61,852,895  | 63,189,965  | 6 | 1 | 7 | 0 |
| Case 87 | 7 | 63,249,780  | 66,479,228  | 5 | 2 | 7 | 0 |
| Case 87 | 7 | 66,482,088  | 66,548,457  | 3 | 2 | 5 | 0 |
| Case 87 | 7 | 66,575,738  | 66,768,879  | 4 | 2 | 6 | 0 |
| Case 87 | 7 | 66,773,745  | 66,863,024  | 3 | 0 | 3 | 1 |
| Case 87 | 7 | 66,864,120  | 67,320,325  | 4 | 0 | 4 | 1 |
| Case 87 | 7 | 67,320,928  | 67,882,598  | 3 | 0 | 3 | 1 |
| Case 87 | 7 | 67,885,035  | 86,512,637  | 3 | 1 | 4 | 0 |
| Case 87 | 7 | 86,521,143  | 95,401,417  | 3 | 2 | 5 | 0 |
| Case 87 | 7 | 95,413,253  | 95,594,026  | 3 | 3 | 6 | 0 |
| Case 87 | 7 | 95,597,472  | 97,298,821  | 3 | 2 | 5 | 0 |
| Case 87 | 7 | 97,298,855  | 98,246,958  | 2 | 2 | 4 | 0 |
| Case 87 | 7 | 98,249,102  | 98,439,700  | 3 | 2 | 5 | 0 |
| Case 87 | 7 | 98,443,953  | 103,327,914 | 2 | 2 | 4 | 0 |
| Case 87 | 7 | 103,330,211 | 104,707,174 | 3 | 2 | 5 | 0 |
| Case 87 | 7 | 104,715,245 | 105,264,302 | 2 | 2 | 4 | 0 |
| Case 87 | 7 | 105,264,544 | 105,645,301 | 3 | 2 | 5 | 0 |
| Case 87 | 7 | 105,649,492 | 110,160,252 | 2 | 2 | 4 | 0 |
| Case 87 | 7 | 110,160,724 | 111,461,811 | 3 | 2 | 5 | 0 |
| Case 87 | 7 | 111,470,745 | 114,323,568 | 2 | 2 | 4 | 0 |
| Case 87 | 7 | 114,329,933 | 117,024,820 | 3 | 2 | 5 | 0 |
| Case 87 | 7 | 117,040,117 | 118,225,898 | 2 | 2 | 4 | 0 |
| Case 87 | 7 | 118,228,470 | 118,570,487 | 3 | 2 | 5 | 0 |
| Case 87 | 7 | 118,571,442 | 122,821,710 | 2 | 2 | 4 | 0 |
| Case 87 | 7 | 122,821,888 | 122,986,940 | 3 | 2 | 5 | 0 |
| Case 87 | 7 | 122,990,979 | 128,449,696 | 2 | 2 | 4 | 0 |
| Case 87 | 7 | 128,450,284 | 128,582,151 | 3 | 2 | 5 | 0 |
| Case 87 | 7 | 128,582,309 | 129,343,967 | 2 | 2 | 4 | 0 |
| Case 87 | 7 | 129,350,170 | 129,663,532 | 3 | 2 | 5 | 0 |
| Case 87 | 7 | 129,664,210 | 131,179,797 | 2 | 2 | 4 | 0 |
| Case 87 | 7 | 131,180,918 | 131,924,557 | 3 | 2 | 5 | 0 |
| Case 87 | 7 | 131,925,916 | 135,431,385 | 2 | 2 | 4 | 0 |
| Case 87 | 7 | 135,432,657 | 135,811,879 | 3 | 2 | 5 | 0 |
| Case 87 | 7 | 135,813,034 | 149,548,591 | 2 | 2 | 4 | 0 |
| Case 87 | 7 | 149,551,993 | 149,837,340 | 3 | 2 | 5 | 0 |

|         |   |             |             |   |   |   |   |
|---------|---|-------------|-------------|---|---|---|---|
| Case 87 | 7 | 149,866,114 | 153,414,005 | 2 | 2 | 4 | 0 |
| Case 87 | 7 | 153,435,344 | 153,452,009 | 4 | 0 | 4 | 1 |
| Case 87 | 7 | 153,461,606 | 153,696,268 | 4 | 1 | 5 | 0 |
| Case 87 | 7 | 153,697,418 | 159,119,486 | 2 | 2 | 4 | 0 |
| Case 87 | 8 | 164,984     | 219,677     | 2 | 0 | 2 | 1 |
| Case 87 | 8 | 221,671     | 420,276     | 3 | 0 | 3 | 1 |
| Case 87 | 8 | 421,858     | 442,614     | 2 | 0 | 2 | 1 |
| Case 87 | 8 | 442,755     | 1,840,497   | 3 | 0 | 3 | 1 |
| Case 87 | 8 | 1,840,697   | 1,905,823   | 2 | 0 | 2 | 1 |
| Case 87 | 8 | 1,906,630   | 2,305,512   | 3 | 0 | 3 | 1 |
| Case 87 | 8 | 2,310,313   | 2,664,858   | 2 | 0 | 2 | 1 |
| Case 87 | 8 | 2,667,474   | 2,703,064   | 3 | 0 | 3 | 1 |
| Case 87 | 8 | 2,704,193   | 3,093,194   | 2 | 0 | 2 | 1 |
| Case 87 | 8 | 3,093,985   | 3,165,343   | 3 | 0 | 3 | 1 |
| Case 87 | 8 | 3,165,624   | 3,717,935   | 2 | 0 | 2 | 1 |
| Case 87 | 8 | 3,717,980   | 3,771,236   | 3 | 0 | 3 | 1 |
| Case 87 | 8 | 3,771,942   | 4,832,237   | 2 | 0 | 2 | 1 |
| Case 87 | 8 | 4,834,406   | 4,910,045   | 3 | 0 | 3 | 1 |
| Case 87 | 8 | 4,914,546   | 5,346,663   | 2 | 0 | 2 | 1 |
| Case 87 | 8 | 5,348,088   | 5,408,321   | 3 | 0 | 3 | 1 |
| Case 87 | 8 | 5,408,863   | 5,454,376   | 2 | 0 | 2 | 1 |
| Case 87 | 8 | 5,456,234   | 5,528,849   | 3 | 0 | 3 | 1 |
| Case 87 | 8 | 5,529,622   | 5,875,524   | 2 | 0 | 2 | 1 |
| Case 87 | 8 | 5,883,129   | 6,084,048   | 3 | 0 | 3 | 1 |
| Case 87 | 8 | 6,084,755   | 6,114,273   | 2 | 0 | 2 | 1 |
| Case 87 | 8 | 6,114,621   | 6,283,772   | 3 | 0 | 3 | 1 |
| Case 87 | 8 | 6,285,539   | 6,385,181   | 2 | 0 | 2 | 1 |
| Case 87 | 8 | 6,386,204   | 6,903,607   | 3 | 0 | 3 | 1 |
| Case 87 | 8 | 6,903,629   | 8,234,192   | 2 | 0 | 2 | 1 |
| Case 87 | 8 | 8,234,219   | 8,967,105   | 3 | 0 | 3 | 1 |
| Case 87 | 8 | 8,971,100   | 8,982,396   | 2 | 0 | 2 | 1 |
| Case 87 | 8 | 8,984,302   | 8,998,022   | 1 | 0 | 1 | 0 |
| Case 87 | 8 | 8,998,461   | 9,044,856   | 2 | 0 | 2 | 1 |
| Case 87 | 8 | 9,046,312   | 9,112,572   | 1 | 0 | 1 | 0 |
| Case 87 | 8 | 9,121,398   | 9,315,807   | 3 | 0 | 3 | 1 |
| Case 87 | 8 | 9,321,780   | 9,623,278   | 2 | 0 | 2 | 1 |
| Case 87 | 8 | 9,634,229   | 10,467,673  | 3 | 0 | 3 | 1 |
| Case 87 | 8 | 10,467,754  | 10,472,468  | 2 | 0 | 2 | 1 |
| Case 87 | 8 | 10,472,638  | 11,142,437  | 3 | 0 | 3 | 1 |
| Case 87 | 8 | 11,142,438  | 11,189,042  | 2 | 0 | 2 | 1 |
| Case 87 | 8 | 11,189,139  | 11,831,477  | 3 | 0 | 3 | 1 |
| Case 87 | 8 | 11,833,262  | 12,880,521  | 2 | 0 | 2 | 1 |
| Case 87 | 8 | 12,882,687  | 12,958,116  | 3 | 0 | 3 | 1 |
| Case 87 | 8 | 12,958,149  | 13,315,533  | 2 | 0 | 2 | 1 |
| Case 87 | 8 | 13,321,182  | 13,357,340  | 3 | 0 | 3 | 1 |
| Case 87 | 8 | 13,357,414  | 17,174,343  | 2 | 0 | 2 | 1 |
| Case 87 | 8 | 17,174,534  | 17,563,896  | 3 | 0 | 3 | 1 |
| Case 87 | 8 | 17,564,973  | 17,581,700  | 2 | 0 | 2 | 1 |
| Case 87 | 8 | 17,582,137  | 17,645,028  | 3 | 0 | 3 | 1 |
| Case 87 | 8 | 17,648,127  | 17,924,739  | 2 | 0 | 2 | 1 |
| Case 87 | 8 | 17,924,750  | 18,080,015  | 3 | 0 | 3 | 1 |
| Case 87 | 8 | 18,080,060  | 18,255,709  | 2 | 0 | 2 | 1 |
| Case 87 | 8 | 18,255,876  | 18,432,108  | 3 | 0 | 3 | 1 |
| Case 87 | 8 | 18,432,308  | 18,665,836  | 2 | 0 | 2 | 1 |
| Case 87 | 8 | 18,666,286  | 20,036,715  | 3 | 0 | 3 | 1 |
| Case 87 | 8 | 20,036,819  | 20,067,135  | 2 | 0 | 2 | 1 |
| Case 87 | 8 | 20,071,503  | 21,972,973  | 3 | 0 | 3 | 1 |
| Case 87 | 8 | 21,976,710  | 21,996,556  | 2 | 0 | 2 | 1 |
| Case 87 | 8 | 22,001,072  | 22,132,033  | 3 | 0 | 3 | 1 |
| Case 87 | 8 | 22,132,837  | 22,167,613  | 2 | 0 | 2 | 1 |
| Case 87 | 8 | 22,168,668  | 22,300,575  | 3 | 0 | 3 | 1 |

|         |   |            |             |   |   |   |   |
|---------|---|------------|-------------|---|---|---|---|
| Case 87 | 8 | 22,303,439 | 22,400,989  | 2 | 0 | 2 | 1 |
| Case 87 | 8 | 22,403,451 | 23,714,609  | 3 | 0 | 3 | 1 |
| Case 87 | 8 | 23,724,908 | 24,566,766  | 2 | 0 | 2 | 1 |
| Case 87 | 8 | 24,571,548 | 25,326,140  | 3 | 0 | 3 | 1 |
| Case 87 | 8 | 25,327,421 | 25,364,889  | 2 | 0 | 2 | 1 |
| Case 87 | 8 | 25,364,960 | 25,657,921  | 3 | 0 | 3 | 1 |
| Case 87 | 8 | 25,660,392 | 25,748,428  | 2 | 0 | 2 | 1 |
| Case 87 | 8 | 25,748,553 | 27,630,131  | 3 | 0 | 3 | 1 |
| Case 87 | 8 | 27,630,152 | 27,702,453  | 2 | 0 | 2 | 1 |
| Case 87 | 8 | 27,711,673 | 30,434,903  | 3 | 0 | 3 | 1 |
| Case 87 | 8 | 30,437,008 | 32,592,627  | 2 | 0 | 2 | 1 |
| Case 87 | 8 | 32,594,251 | 33,988,414  | 3 | 0 | 3 | 1 |
| Case 87 | 8 | 33,994,378 | 34,747,261  | 2 | 0 | 2 | 1 |
| Case 87 | 8 | 34,762,526 | 35,616,857  | 3 | 0 | 3 | 1 |
| Case 87 | 8 | 35,622,598 | 37,003,868  | 2 | 0 | 2 | 1 |
| Case 87 | 8 | 37,004,569 | 38,840,591  | 3 | 0 | 3 | 1 |
| Case 87 | 8 | 38,845,455 | 39,824,406  | 2 | 0 | 2 | 1 |
| Case 87 | 8 | 39,831,647 | 40,494,700  | 3 | 0 | 3 | 1 |
| Case 87 | 8 | 40,499,624 | 40,541,533  | 2 | 0 | 2 | 1 |
| Case 87 | 8 | 40,542,986 | 41,223,011  | 3 | 0 | 3 | 1 |
| Case 87 | 8 | 41,228,458 | 41,308,927  | 2 | 0 | 2 | 1 |
| Case 87 | 8 | 41,310,010 | 42,706,014  | 3 | 0 | 3 | 1 |
| Case 87 | 8 | 42,708,406 | 43,791,691  | 2 | 0 | 2 | 1 |
| Case 87 | 8 | 46,886,735 | 49,039,681  | 2 | 0 | 2 | 1 |
| Case 87 | 8 | 49,046,707 | 49,576,282  | 3 | 2 | 5 | 0 |
| Case 87 | 8 | 49,581,021 | 51,412,591  | 2 | 2 | 4 | 0 |
| Case 87 | 8 | 51,415,351 | 52,138,162  | 3 | 2 | 5 | 0 |
| Case 87 | 8 | 52,140,746 | 52,147,655  | 2 | 0 | 2 | 1 |
| Case 87 | 8 | 52,155,181 | 59,710,250  | 3 | 2 | 5 | 0 |
| Case 87 | 8 | 59,712,593 | 59,838,928  | 2 | 2 | 4 | 0 |
| Case 87 | 8 | 59,840,108 | 60,345,744  | 3 | 2 | 5 | 0 |
| Case 87 | 8 | 60,346,384 | 61,396,829  | 3 | 1 | 4 | 0 |
| Case 87 | 8 | 61,418,431 | 61,904,948  | 2 | 1 | 3 | 0 |
| Case 87 | 8 | 61,909,133 | 67,465,588  | 3 | 1 | 4 | 0 |
| Case 87 | 8 | 67,478,328 | 68,028,252  | 2 | 1 | 3 | 0 |
| Case 87 | 8 | 68,030,542 | 75,838,269  | 3 | 1 | 4 | 0 |
| Case 87 | 8 | 75,838,927 | 75,946,695  | 2 | 1 | 3 | 0 |
| Case 87 | 8 | 75,976,170 | 77,931,941  | 3 | 1 | 4 | 0 |
| Case 87 | 8 | 77,969,818 | 79,347,559  | 2 | 2 | 4 | 0 |
| Case 87 | 8 | 79,350,458 | 79,556,891  | 3 | 2 | 5 | 0 |
| Case 87 | 8 | 79,563,172 | 79,703,113  | 2 | 2 | 4 | 0 |
| Case 87 | 8 | 79,707,140 | 82,715,352  | 3 | 2 | 5 | 0 |
| Case 87 | 8 | 82,715,411 | 86,099,701  | 2 | 2 | 4 | 0 |
| Case 87 | 8 | 86,099,942 | 87,677,217  | 4 | 1 | 5 | 0 |
| Case 87 | 8 | 87,679,098 | 90,300,401  | 3 | 2 | 5 | 0 |
| Case 87 | 8 | 90,307,568 | 90,409,007  | 2 | 0 | 2 | 1 |
| Case 87 | 8 | 90,435,348 | 90,478,557  | 3 | 2 | 5 | 0 |
| Case 87 | 8 | 90,488,877 | 91,381,801  | 4 | 2 | 6 | 0 |
| Case 87 | 8 | 91,397,407 | 92,730,829  | 3 | 2 | 5 | 0 |
| Case 87 | 8 | 92,736,906 | 93,586,507  | 4 | 2 | 6 | 0 |
| Case 87 | 8 | 93,587,180 | 93,615,407  | 3 | 2 | 5 | 0 |
| Case 87 | 8 | 93,618,272 | 146,293,414 | 2 | 2 | 4 | 0 |
| Case 87 | 9 | 46,587     | 248,749     | 2 | 0 | 2 | 1 |
| Case 87 | 9 | 249,281    | 527,180     | 3 | 0 | 3 | 1 |
| Case 87 | 9 | 529,916    | 679,901     | 2 | 0 | 2 | 1 |
| Case 87 | 9 | 680,323    | 1,605,103   | 3 | 0 | 3 | 1 |
| Case 87 | 9 | 1,605,827  | 1,704,023   | 2 | 0 | 2 | 1 |
| Case 87 | 9 | 1,705,519  | 2,007,485   | 3 | 0 | 3 | 1 |
| Case 87 | 9 | 2,013,580  | 2,114,024   | 2 | 0 | 2 | 1 |
| Case 87 | 9 | 2,115,271  | 2,389,032   | 3 | 0 | 3 | 1 |
| Case 87 | 9 | 2,391,261  | 2,603,361   | 2 | 0 | 2 | 1 |

|         |   |            |            |   |   |   |   |
|---------|---|------------|------------|---|---|---|---|
| Case 87 | 9 | 2,605,023  | 2,718,349  | 3 | 0 | 3 | 1 |
| Case 87 | 9 | 2,718,415  | 3,765,395  | 2 | 0 | 2 | 1 |
| Case 87 | 9 | 3,772,674  | 3,864,491  | 3 | 0 | 3 | 1 |
| Case 87 | 9 | 3,865,097  | 3,898,987  | 2 | 0 | 2 | 1 |
| Case 87 | 9 | 3,900,782  | 3,965,805  | 1 | 0 | 1 | 0 |
| Case 87 | 9 | 3,967,645  | 4,002,823  | 2 | 0 | 2 | 1 |
| Case 87 | 9 | 4,005,108  | 4,193,531  | 3 | 0 | 3 | 1 |
| Case 87 | 9 | 4,194,762  | 4,291,928  | 2 | 0 | 2 | 1 |
| Case 87 | 9 | 4,292,012  | 4,380,523  | 3 | 0 | 3 | 1 |
| Case 87 | 9 | 4,383,219  | 4,482,706  | 2 | 0 | 2 | 1 |
| Case 87 | 9 | 4,483,189  | 4,625,359  | 3 | 0 | 3 | 1 |
| Case 87 | 9 | 4,625,415  | 4,658,449  | 2 | 0 | 2 | 1 |
| Case 87 | 9 | 4,659,111  | 4,937,331  | 3 | 0 | 3 | 1 |
| Case 87 | 9 | 4,937,872  | 5,335,264  | 2 | 0 | 2 | 1 |
| Case 87 | 9 | 5,335,329  | 5,581,140  | 3 | 0 | 3 | 1 |
| Case 87 | 9 | 5,593,419  | 5,830,789  | 2 | 0 | 2 | 1 |
| Case 87 | 9 | 5,830,856  | 5,922,860  | 3 | 0 | 3 | 1 |
| Case 87 | 9 | 5,923,103  | 6,170,162  | 2 | 0 | 2 | 1 |
| Case 87 | 9 | 6,176,770  | 6,932,013  | 3 | 0 | 3 | 1 |
| Case 87 | 9 | 6,936,215  | 7,081,886  | 2 | 0 | 2 | 1 |
| Case 87 | 9 | 7,084,213  | 7,607,425  | 3 | 0 | 3 | 1 |
| Case 87 | 9 | 7,612,143  | 7,824,725  | 2 | 0 | 2 | 1 |
| Case 87 | 9 | 7,826,827  | 7,922,071  | 3 | 0 | 3 | 1 |
| Case 87 | 9 | 7,924,047  | 8,467,855  | 2 | 0 | 2 | 1 |
| Case 87 | 9 | 8,468,567  | 8,486,299  | 3 | 0 | 3 | 1 |
| Case 87 | 9 | 8,486,335  | 12,926,571 | 2 | 0 | 2 | 1 |
| Case 87 | 9 | 12,928,475 | 13,099,797 | 3 | 0 | 3 | 1 |
| Case 87 | 9 | 13,105,638 | 14,304,973 | 2 | 0 | 2 | 1 |
| Case 87 | 9 | 14,309,552 | 14,573,613 | 3 | 0 | 3 | 1 |
| Case 87 | 9 | 14,585,052 | 14,842,557 | 2 | 0 | 2 | 1 |
| Case 87 | 9 | 14,842,560 | 14,900,356 | 3 | 0 | 3 | 1 |
| Case 87 | 9 | 14,901,322 | 15,240,912 | 2 | 0 | 2 | 1 |
| Case 87 | 9 | 15,243,411 | 15,301,428 | 3 | 0 | 3 | 1 |
| Case 87 | 9 | 15,304,782 | 16,026,444 | 2 | 0 | 2 | 1 |
| Case 87 | 9 | 16,026,664 | 16,520,681 | 3 | 0 | 3 | 1 |
| Case 87 | 9 | 16,520,958 | 17,793,435 | 2 | 0 | 2 | 1 |
| Case 87 | 9 | 17,793,463 | 17,951,118 | 3 | 0 | 3 | 1 |
| Case 87 | 9 | 17,952,583 | 18,125,480 | 2 | 0 | 2 | 1 |
| Case 87 | 9 | 18,125,966 | 18,494,532 | 3 | 0 | 3 | 1 |
| Case 87 | 9 | 18,495,515 | 18,700,566 | 2 | 0 | 2 | 1 |
| Case 87 | 9 | 18,706,845 | 19,162,016 | 3 | 0 | 3 | 1 |
| Case 87 | 9 | 19,163,207 | 19,378,903 | 2 | 0 | 2 | 1 |
| Case 87 | 9 | 19,379,502 | 19,801,918 | 3 | 0 | 3 | 1 |
| Case 87 | 9 | 19,803,724 | 19,942,311 | 2 | 0 | 2 | 1 |
| Case 87 | 9 | 19,942,824 | 20,001,782 | 3 | 0 | 3 | 1 |
| Case 87 | 9 | 20,005,312 | 20,038,436 | 2 | 0 | 2 | 1 |
| Case 87 | 9 | 20,039,441 | 20,418,323 | 3 | 0 | 3 | 1 |
| Case 87 | 9 | 20,428,137 | 21,531,629 | 2 | 0 | 2 | 1 |
| Case 87 | 9 | 21,536,423 | 21,611,256 | 3 | 0 | 3 | 1 |
| Case 87 | 9 | 21,620,510 | 27,081,879 | 2 | 0 | 2 | 1 |
| Case 87 | 9 | 27,083,814 | 27,228,754 | 3 | 0 | 3 | 1 |
| Case 87 | 9 | 27,229,141 | 27,326,904 | 2 | 0 | 2 | 1 |
| Case 87 | 9 | 27,328,964 | 27,490,967 | 3 | 0 | 3 | 1 |
| Case 87 | 9 | 27,497,792 | 27,848,430 | 2 | 0 | 2 | 1 |
| Case 87 | 9 | 27,850,239 | 28,001,944 | 3 | 0 | 3 | 1 |
| Case 87 | 9 | 28,002,083 | 32,314,084 | 2 | 0 | 2 | 1 |
| Case 87 | 9 | 32,316,967 | 32,453,278 | 3 | 0 | 3 | 1 |
| Case 87 | 9 | 32,455,262 | 32,592,639 | 2 | 0 | 2 | 1 |
| Case 87 | 9 | 32,596,952 | 37,097,670 | 3 | 0 | 3 | 1 |
| Case 87 | 9 | 37,119,528 | 37,302,155 | 2 | 0 | 2 | 1 |
| Case 87 | 9 | 37,302,186 | 38,736,897 | 3 | 0 | 3 | 1 |

|         |    |             |             |   |   |   |   |
|---------|----|-------------|-------------|---|---|---|---|
| Case 87 | 9  | 38,738,294  | 39,004,140  | 2 | 0 | 2 | 1 |
| Case 87 | 9  | 39,076,028  | 40,800,551  | 2 | 1 | 3 | 0 |
| Case 87 | 9  | 41,290,880  | 46,944,322  | 4 | 1 | 5 | 0 |
| Case 87 | 9  | 65,629,772  | 69,238,239  | 4 | 1 | 5 | 0 |
| Case 87 | 9  | 69,355,037  | 77,150,289  | 2 | 2 | 4 | 0 |
| Case 87 | 9  | 77,157,976  | 77,315,134  | 3 | 0 | 3 | 1 |
| Case 87 | 9  | 77,318,073  | 78,061,301  | 2 | 0 | 2 | 1 |
| Case 87 | 9  | 78,066,726  | 78,260,714  | 3 | 0 | 3 | 1 |
| Case 87 | 9  | 78,262,577  | 78,430,918  | 2 | 0 | 2 | 1 |
| Case 87 | 9  | 78,438,434  | 78,751,632  | 3 | 0 | 3 | 1 |
| Case 87 | 9  | 78,751,683  | 78,802,474  | 2 | 0 | 2 | 1 |
| Case 87 | 9  | 78,803,466  | 79,435,440  | 3 | 0 | 3 | 1 |
| Case 87 | 9  | 79,436,617  | 80,032,108  | 2 | 0 | 2 | 1 |
| Case 87 | 9  | 80,039,006  | 80,381,887  | 3 | 0 | 3 | 1 |
| Case 87 | 9  | 80,389,921  | 80,917,070  | 2 | 0 | 2 | 1 |
| Case 87 | 9  | 80,918,333  | 81,226,171  | 3 | 0 | 3 | 1 |
| Case 87 | 9  | 81,226,596  | 82,582,453  | 2 | 0 | 2 | 1 |
| Case 87 | 9  | 82,582,993  | 82,805,488  | 3 | 0 | 3 | 1 |
| Case 87 | 9  | 82,807,503  | 84,152,604  | 2 | 0 | 2 | 1 |
| Case 87 | 9  | 84,160,842  | 84,609,794  | 3 | 0 | 3 | 1 |
| Case 87 | 9  | 84,618,966  | 85,798,903  | 2 | 0 | 2 | 1 |
| Case 87 | 9  | 85,799,271  | 86,552,205  | 3 | 0 | 3 | 1 |
| Case 87 | 9  | 86,553,589  | 86,700,737  | 2 | 0 | 2 | 1 |
| Case 87 | 9  | 86,700,760  | 86,955,682  | 3 | 0 | 3 | 1 |
| Case 87 | 9  | 86,956,612  | 87,430,491  | 2 | 0 | 2 | 1 |
| Case 87 | 9  | 87,441,475  | 88,159,352  | 3 | 0 | 3 | 1 |
| Case 87 | 9  | 88,160,238  | 88,648,217  | 2 | 0 | 2 | 1 |
| Case 87 | 9  | 88,648,274  | 88,790,268  | 3 | 0 | 3 | 1 |
| Case 87 | 9  | 88,794,032  | 89,022,298  | 2 | 2 | 4 | 0 |
| Case 87 | 9  | 89,023,508  | 89,149,329  | 3 | 2 | 5 | 0 |
| Case 87 | 9  | 89,157,066  | 89,404,665  | 2 | 2 | 4 | 0 |
| Case 87 | 9  | 89,408,927  | 89,991,119  | 3 | 0 | 3 | 1 |
| Case 87 | 9  | 89,996,566  | 99,521,119  | 2 | 2 | 4 | 0 |
| Case 87 | 9  | 99,521,123  | 99,584,880  | 3 | 0 | 3 | 1 |
| Case 87 | 9  | 99,585,314  | 116,958,288 | 2 | 2 | 4 | 0 |
| Case 87 | 9  | 116,958,646 | 121,430,880 | 3 | 2 | 5 | 0 |
| Case 87 | 9  | 121,442,207 | 132,163,254 | 2 | 2 | 4 | 0 |
| Case 87 | 9  | 132,167,567 | 132,444,099 | 3 | 2 | 5 | 0 |
| Case 87 | 9  | 132,447,093 | 136,722,358 | 2 | 2 | 4 | 0 |
| Case 87 | 9  | 136,723,520 | 137,642,654 | 3 | 2 | 5 | 0 |
| Case 87 | 9  | 137,642,705 | 141,066,491 | 2 | 2 | 4 | 0 |
| Case 87 | 10 | 98,087      | 310,225     | 2 | 0 | 2 | 1 |
| Case 87 | 10 | 313,304     | 776,027     | 3 | 0 | 3 | 1 |
| Case 87 | 10 | 776,394     | 813,426     | 2 | 0 | 2 | 1 |
| Case 87 | 10 | 815,149     | 1,756,440   | 3 | 0 | 3 | 1 |
| Case 87 | 10 | 1,760,992   | 1,870,359   | 2 | 0 | 2 | 1 |
| Case 87 | 10 | 1,872,726   | 2,022,323   | 3 | 0 | 3 | 1 |
| Case 87 | 10 | 2,027,751   | 2,154,862   | 2 | 0 | 2 | 1 |
| Case 87 | 10 | 2,158,398   | 2,360,003   | 3 | 0 | 3 | 1 |
| Case 87 | 10 | 2,363,832   | 2,909,884   | 2 | 0 | 2 | 1 |
| Case 87 | 10 | 2,910,624   | 2,981,486   | 3 | 0 | 3 | 1 |
| Case 87 | 10 | 2,982,125   | 3,076,294   | 2 | 0 | 2 | 1 |
| Case 87 | 10 | 3,077,299   | 4,252,171   | 3 | 0 | 3 | 1 |
| Case 87 | 10 | 4,256,975   | 4,832,920   | 2 | 0 | 2 | 1 |
| Case 87 | 10 | 4,833,049   | 5,159,453   | 3 | 0 | 3 | 1 |
| Case 87 | 10 | 5,161,955   | 5,311,075   | 2 | 0 | 2 | 1 |
| Case 87 | 10 | 5,313,029   | 5,469,386   | 3 | 0 | 3 | 1 |
| Case 87 | 10 | 5,471,143   | 5,526,375   | 2 | 0 | 2 | 1 |
| Case 87 | 10 | 5,527,716   | 5,734,358   | 3 | 0 | 3 | 1 |
| Case 87 | 10 | 5,735,648   | 5,957,301   | 2 | 0 | 2 | 1 |
| Case 87 | 10 | 5,957,470   | 6,805,486   | 3 | 0 | 3 | 1 |



|         |    |            |            |   |   |   |   |
|---------|----|------------|------------|---|---|---|---|
| Case 87 | 10 | 6,807,941  | 6,947,860  | 2 | 0 | 2 | 1 |
| Case 87 | 10 | 6,951,452  | 7,780,628  | 3 | 0 | 3 | 1 |
| Case 87 | 10 | 7,780,646  | 7,932,563  | 2 | 0 | 2 | 1 |
| Case 87 | 10 | 7,935,761  | 8,566,311  | 3 | 0 | 3 | 1 |
| Case 87 | 10 | 8,566,508  | 10,479,512 | 2 | 0 | 2 | 1 |
| Case 87 | 10 | 10,480,283 | 11,477,584 | 3 | 0 | 3 | 1 |
| Case 87 | 10 | 11,479,998 | 11,681,939 | 2 | 0 | 2 | 1 |
| Case 87 | 10 | 11,682,355 | 11,950,934 | 3 | 0 | 3 | 1 |
| Case 87 | 10 | 11,951,896 | 12,099,023 | 2 | 0 | 2 | 1 |
| Case 87 | 10 | 12,100,735 | 12,307,963 | 3 | 0 | 3 | 1 |
| Case 87 | 10 | 12,310,737 | 12,497,770 | 2 | 0 | 2 | 1 |
| Case 87 | 10 | 12,499,860 | 13,516,469 | 3 | 0 | 3 | 1 |
| Case 87 | 10 | 13,519,743 | 13,680,726 | 2 | 0 | 2 | 1 |
| Case 87 | 10 | 13,681,108 | 14,523,377 | 3 | 0 | 3 | 1 |
| Case 87 | 10 | 14,527,223 | 14,621,153 | 2 | 0 | 2 | 1 |
| Case 87 | 10 | 14,622,448 | 14,817,067 | 3 | 0 | 3 | 1 |
| Case 87 | 10 | 14,818,646 | 15,127,987 | 2 | 0 | 2 | 1 |
| Case 87 | 10 | 15,134,222 | 15,558,818 | 3 | 0 | 3 | 1 |
| Case 87 | 10 | 15,561,315 | 17,259,567 | 2 | 0 | 2 | 1 |
| Case 87 | 10 | 17,260,290 | 17,604,430 | 3 | 0 | 3 | 1 |
| Case 87 | 10 | 17,609,464 | 21,370,420 | 2 | 0 | 2 | 1 |
| Case 87 | 10 | 21,370,995 | 21,409,757 | 3 | 0 | 3 | 1 |
| Case 87 | 10 | 21,410,114 | 21,421,272 | 2 | 0 | 2 | 1 |
| Case 87 | 10 | 21,423,495 | 21,867,391 | 3 | 0 | 3 | 1 |
| Case 87 | 10 | 21,869,609 | 24,408,398 | 2 | 0 | 2 | 1 |
| Case 87 | 10 | 24,417,442 | 24,858,390 | 3 | 0 | 3 | 1 |
| Case 87 | 10 | 24,863,020 | 25,883,475 | 2 | 0 | 2 | 1 |
| Case 87 | 10 | 25,885,675 | 25,926,559 | 3 | 0 | 3 | 1 |
| Case 87 | 10 | 25,932,400 | 26,849,088 | 2 | 0 | 2 | 1 |
| Case 87 | 10 | 26,849,689 | 27,025,659 | 3 | 0 | 3 | 1 |
| Case 87 | 10 | 27,031,454 | 27,700,887 | 2 | 0 | 2 | 1 |
| Case 87 | 10 | 27,701,920 | 27,703,017 | 2 | 1 | 3 | 0 |
| Case 87 | 10 | 27,703,356 | 28,430,660 | 2 | 0 | 2 | 1 |
| Case 87 | 10 | 28,433,708 | 28,821,216 | 3 | 0 | 3 | 1 |
| Case 87 | 10 | 28,824,560 | 28,936,753 | 2 | 0 | 2 | 1 |
| Case 87 | 10 | 28,939,852 | 29,123,532 | 3 | 0 | 3 | 1 |
| Case 87 | 10 | 29,124,168 | 29,205,665 | 2 | 0 | 2 | 1 |
| Case 87 | 10 | 29,206,762 | 29,300,987 | 3 | 0 | 3 | 1 |
| Case 87 | 10 | 29,302,946 | 29,619,193 | 2 | 0 | 2 | 1 |
| Case 87 | 10 | 29,621,419 | 29,861,341 | 3 | 0 | 3 | 1 |
| Case 87 | 10 | 29,864,370 | 30,143,168 | 2 | 0 | 2 | 1 |
| Case 87 | 10 | 30,149,457 | 30,176,188 | 3 | 0 | 3 | 1 |
| Case 87 | 10 | 30,177,850 | 30,201,353 | 2 | 0 | 2 | 1 |
| Case 87 | 10 | 30,204,072 | 30,537,797 | 3 | 0 | 3 | 1 |
| Case 87 | 10 | 30,559,414 | 30,673,598 | 2 | 0 | 2 | 1 |
| Case 87 | 10 | 30,676,359 | 30,829,020 | 3 | 0 | 3 | 1 |
| Case 87 | 10 | 30,829,330 | 31,024,135 | 2 | 0 | 2 | 1 |
| Case 87 | 10 | 31,030,449 | 31,137,854 | 3 | 0 | 3 | 1 |
| Case 87 | 10 | 31,138,577 | 31,276,664 | 2 | 0 | 2 | 1 |
| Case 87 | 10 | 31,282,422 | 31,607,215 | 3 | 0 | 3 | 1 |
| Case 87 | 10 | 31,662,486 | 31,883,612 | 2 | 0 | 2 | 1 |
| Case 87 | 10 | 31,886,363 | 32,067,305 | 3 | 0 | 3 | 1 |
| Case 87 | 10 | 32,070,331 | 32,114,950 | 2 | 0 | 2 | 1 |
| Case 87 | 10 | 32,128,023 | 33,534,880 | 3 | 2 | 5 | 0 |
| Case 87 | 10 | 33,535,907 | 35,102,818 | 2 | 2 | 4 | 0 |
| Case 87 | 10 | 35,107,733 | 38,044,471 | 3 | 2 | 5 | 0 |
| Case 87 | 10 | 38,061,643 | 39,097,912 | 2 | 2 | 4 | 0 |
| Case 87 | 10 | 42,436,301 | 72,671,684 | 2 | 2 | 4 | 0 |
| Case 87 | 10 | 72,673,607 | 72,786,497 | 3 | 0 | 3 | 1 |
| Case 87 | 10 | 72,786,849 | 75,324,903 | 4 | 0 | 4 | 1 |
| Case 87 | 10 | 75,331,219 | 75,854,181 | 4 | 1 | 5 | 0 |

|         |    |             |             |   |   |   |   |
|---------|----|-------------|-------------|---|---|---|---|
| Case 87 | 10 | 75,854,218  | 76,527,573  | 3 | 1 | 4 | 0 |
| Case 87 | 10 | 76,540,987  | 80,919,442  | 2 | 1 | 3 | 0 |
| Case 87 | 10 | 80,920,370  | 80,920,370  | 2 | 0 | 2 | 1 |
| Case 87 | 10 | 80,921,427  | 80,996,513  | 3 | 0 | 3 | 1 |
| Case 87 | 10 | 80,999,869  | 81,010,850  | 2 | 2 | 4 | 0 |
| Case 87 | 10 | 81,011,589  | 91,470,871  | 2 | 1 | 3 | 0 |
| Case 87 | 10 | 91,471,104  | 91,518,638  | 2 | 0 | 2 | 1 |
| Case 87 | 10 | 91,520,368  | 94,779,550  | 2 | 1 | 3 | 0 |
| Case 87 | 10 | 94,781,857  | 115,594,990 | 4 | 1 | 5 | 0 |
| Case 87 | 10 | 115,595,030 | 115,668,149 | 4 | 0 | 4 | 1 |
| Case 87 | 10 | 115,670,813 | 121,557,050 | 4 | 1 | 5 | 0 |
| Case 87 | 10 | 121,564,904 | 121,689,182 | 4 | 0 | 4 | 1 |
| Case 87 | 10 | 121,689,188 | 129,899,578 | 4 | 1 | 5 | 0 |
| Case 87 | 10 | 129,899,778 | 129,998,372 | 3 | 1 | 4 | 0 |
| Case 87 | 10 | 130,004,977 | 134,504,693 | 4 | 1 | 5 | 0 |
| Case 87 | 10 | 134,511,340 | 135,233,646 | 3 | 1 | 4 | 0 |
| Case 87 | 10 | 135,234,393 | 135,339,605 | 3 | 2 | 5 | 0 |
| Case 87 | 10 | 135,339,845 | 135,477,883 | 2 | 2 | 4 | 0 |
| Case 87 | 11 | 193,146     | 8,370,644   | 2 | 2 | 4 | 0 |
| Case 87 | 11 | 8,374,548   | 8,414,229   | 3 | 0 | 3 | 1 |
| Case 87 | 11 | 8,416,123   | 8,496,301   | 2 | 0 | 2 | 1 |
| Case 87 | 11 | 8,496,557   | 8,799,749   | 3 | 0 | 3 | 1 |
| Case 87 | 11 | 8,803,491   | 8,938,895   | 2 | 0 | 2 | 1 |
| Case 87 | 11 | 8,939,887   | 9,294,967   | 3 | 0 | 3 | 1 |
| Case 87 | 11 | 9,304,120   | 9,610,805   | 2 | 0 | 2 | 1 |
| Case 87 | 11 | 9,615,459   | 9,809,956   | 3 | 0 | 3 | 1 |
| Case 87 | 11 | 9,810,783   | 10,174,447  | 2 | 0 | 2 | 1 |
| Case 87 | 11 | 10,186,289  | 51,591,253  | 2 | 2 | 4 | 0 |
| Case 87 | 11 | 54,794,237  | 86,140,441  | 2 | 2 | 4 | 0 |
| Case 87 | 11 | 86,145,296  | 86,264,881  | 3 | 0 | 3 | 1 |
| Case 87 | 11 | 86,266,683  | 96,176,441  | 2 | 2 | 4 | 0 |
| Case 87 | 11 | 96,179,183  | 96,232,426  | 2 | 0 | 2 | 1 |
| Case 87 | 11 | 96,236,914  | 100,321,140 | 2 | 2 | 4 | 0 |
| Case 87 | 11 | 100,322,582 | 100,322,582 | 3 | 2 | 5 | 0 |
| Case 87 | 11 | 100,329,957 | 100,720,108 | 4 | 2 | 6 | 0 |
| Case 87 | 11 | 100,723,516 | 100,830,693 | 3 | 2 | 5 | 0 |
| Case 87 | 11 | 100,837,804 | 109,357,059 | 2 | 2 | 4 | 0 |
| Case 87 | 11 | 109,382,921 | 110,147,873 | 3 | 2 | 5 | 0 |
| Case 87 | 11 | 110,156,596 | 110,234,596 | 2 | 0 | 2 | 1 |
| Case 87 | 11 | 110,237,299 | 110,476,059 | 3 | 0 | 3 | 1 |
| Case 87 | 11 | 110,476,536 | 110,616,415 | 2 | 0 | 2 | 1 |
| Case 87 | 11 | 110,617,469 | 113,578,677 | 3 | 0 | 3 | 1 |
| Case 87 | 11 | 113,579,837 | 113,679,119 | 2 | 0 | 2 | 1 |
| Case 87 | 11 | 113,679,129 | 114,164,004 | 3 | 0 | 3 | 1 |
| Case 87 | 11 | 114,167,476 | 114,385,514 | 2 | 0 | 2 | 1 |
| Case 87 | 11 | 114,387,069 | 115,101,294 | 3 | 0 | 3 | 1 |
| Case 87 | 11 | 115,104,172 | 115,412,993 | 2 | 0 | 2 | 1 |
| Case 87 | 11 | 115,416,391 | 120,183,803 | 3 | 0 | 3 | 1 |
| Case 87 | 11 | 120,185,684 | 120,350,819 | 2 | 0 | 2 | 1 |
| Case 87 | 11 | 120,350,902 | 121,062,860 | 3 | 0 | 3 | 1 |
| Case 87 | 11 | 121,072,088 | 121,203,796 | 2 | 0 | 2 | 1 |
| Case 87 | 11 | 121,206,354 | 121,835,389 | 3 | 0 | 3 | 1 |
| Case 87 | 11 | 121,840,829 | 122,025,745 | 2 | 0 | 2 | 1 |
| Case 87 | 11 | 122,030,190 | 122,682,111 | 3 | 0 | 3 | 1 |
| Case 87 | 11 | 122,682,156 | 122,756,610 | 2 | 0 | 2 | 1 |
| Case 87 | 11 | 122,759,066 | 123,676,994 | 3 | 0 | 3 | 1 |
| Case 87 | 11 | 123,677,056 | 123,810,603 | 2 | 0 | 2 | 1 |
| Case 87 | 11 | 123,810,604 | 124,064,554 | 3 | 0 | 3 | 1 |
| Case 87 | 11 | 124,066,627 | 124,174,874 | 2 | 0 | 2 | 1 |
| Case 87 | 11 | 124,179,450 | 124,824,066 | 3 | 0 | 3 | 1 |
| Case 87 | 11 | 124,824,804 | 124,911,136 | 2 | 0 | 2 | 1 |

|         |    |             |             |   |   |   |   |
|---------|----|-------------|-------------|---|---|---|---|
| Case 87 | 11 | 124,931,334 | 127,164,405 | 3 | 0 | 3 | 1 |
| Case 87 | 11 | 127,169,960 | 127,697,825 | 2 | 0 | 2 | 1 |
| Case 87 | 11 | 127,700,566 | 128,844,481 | 3 | 0 | 3 | 1 |
| Case 87 | 11 | 128,844,513 | 129,134,546 | 2 | 0 | 2 | 1 |
| Case 87 | 11 | 129,143,231 | 132,543,770 | 3 | 0 | 3 | 1 |
| Case 87 | 11 | 132,545,143 | 132,573,390 | 2 | 0 | 2 | 1 |
| Case 87 | 11 | 132,574,789 | 134,736,358 | 3 | 0 | 3 | 1 |
| Case 87 | 11 | 134,738,270 | 134,934,063 | 2 | 0 | 2 | 1 |
| Case 87 | 12 | 191,619     | 34,853,011  | 2 | 2 | 4 | 0 |
| Case 87 | 12 | 37,876,400  | 125,029,792 | 2 | 2 | 4 | 0 |
| Case 87 | 12 | 125,030,939 | 125,261,593 | 3 | 2 | 5 | 0 |
| Case 87 | 12 | 125,265,636 | 131,793,372 | 2 | 2 | 4 | 0 |
| Case 87 | 12 | 131,797,608 | 131,825,125 | 2 | 0 | 2 | 1 |
| Case 87 | 12 | 131,830,332 | 133,584,893 | 2 | 2 | 4 | 0 |
| Case 87 | 12 | 133,584,988 | 133,810,935 | 3 | 0 | 3 | 1 |
| Case 87 | 13 | 19,058,717  | 22,394,315  | 3 | 3 | 6 | 0 |
| Case 87 | 13 | 22,395,049  | 24,939,216  | 3 | 2 | 5 | 0 |
| Case 87 | 13 | 24,939,726  | 25,223,277  | 2 | 2 | 4 | 0 |
| Case 87 | 13 | 25,223,720  | 25,324,895  | 3 | 2 | 5 | 0 |
| Case 87 | 13 | 25,325,622  | 25,526,357  | 2 | 2 | 4 | 0 |
| Case 87 | 13 | 25,533,831  | 26,680,704  | 3 | 2 | 5 | 0 |
| Case 87 | 13 | 26,686,438  | 32,839,224  | 3 | 1 | 4 | 0 |
| Case 87 | 13 | 32,844,834  | 32,876,296  | 6 | 1 | 7 | 0 |
| Case 87 | 13 | 32,876,514  | 36,535,192  | 3 | 1 | 4 | 0 |
| Case 87 | 13 | 36,537,530  | 36,801,256  | 6 | 1 | 7 | 0 |
| Case 87 | 13 | 36,801,415  | 38,638,271  | 5 | 2 | 7 | 0 |
| Case 87 | 13 | 38,647,038  | 38,647,038  | 3 | 2 | 5 | 0 |
| Case 87 | 13 | 38,652,049  | 38,652,049  | 5 | 1 | 6 | 0 |
| Case 87 | 13 | 38,654,219  | 43,351,947  | 6 | 1 | 7 | 0 |
| Case 87 | 13 | 43,353,044  | 43,378,472  | 3 | 2 | 5 | 0 |
| Case 87 | 13 | 43,379,674  | 44,681,950  | 3 | 1 | 4 | 0 |
| Case 87 | 13 | 44,682,973  | 44,690,110  | 3 | 2 | 5 | 0 |
| Case 87 | 13 | 44,692,881  | 45,030,179  | 5 | 1 | 6 | 0 |
| Case 87 | 13 | 45,030,799  | 49,022,794  | 3 | 1 | 4 | 0 |
| Case 87 | 13 | 49,032,471  | 49,223,087  | 6 | 1 | 7 | 0 |
| Case 87 | 13 | 49,232,391  | 58,257,165  | 3 | 1 | 4 | 0 |
| Case 87 | 13 | 58,257,265  | 58,257,265  | 2 | 1 | 3 | 0 |
| Case 87 | 13 | 58,266,222  | 59,713,597  | 1 | 0 | 1 | 0 |
| Case 87 | 13 | 59,713,776  | 65,172,235  | 3 | 1 | 4 | 0 |
| Case 87 | 13 | 65,178,318  | 69,127,905  | 2 | 1 | 3 | 0 |
| Case 87 | 13 | 69,129,159  | 108,564,358 | 3 | 1 | 4 | 0 |
| Case 87 | 13 | 108,564,597 | 109,236,017 | 3 | 0 | 3 | 1 |
| Case 87 | 13 | 109,241,989 | 111,720,978 | 3 | 2 | 5 | 0 |
| Case 87 | 13 | 111,721,756 | 111,948,823 | 2 | 2 | 4 | 0 |
| Case 87 | 13 | 111,954,634 | 113,694,509 | 3 | 2 | 5 | 0 |
| Case 87 | 13 | 113,696,102 | 113,826,078 | 2 | 2 | 4 | 0 |
| Case 87 | 13 | 113,826,087 | 114,198,049 | 3 | 2 | 5 | 0 |
| Case 87 | 13 | 114,198,725 | 114,542,716 | 2 | 2 | 4 | 0 |
| Case 87 | 13 | 114,542,858 | 115,103,529 | 3 | 2 | 5 | 0 |
| Case 87 | 14 | 19,280,733  | 20,416,499  | 3 | 2 | 5 | 0 |
| Case 87 | 14 | 20,420,338  | 21,405,885  | 3 | 3 | 6 | 0 |
| Case 87 | 14 | 21,413,602  | 22,002,461  | 3 | 2 | 5 | 0 |
| Case 87 | 14 | 22,002,604  | 22,972,986  | 3 | 3 | 6 | 0 |
| Case 87 | 14 | 22,974,256  | 25,359,882  | 3 | 2 | 5 | 0 |
| Case 87 | 14 | 25,361,268  | 25,718,191  | 3 | 3 | 6 | 0 |
| Case 87 | 14 | 25,718,224  | 37,595,632  | 3 | 2 | 5 | 0 |
| Case 87 | 14 | 37,603,194  | 56,197,159  | 2 | 2 | 4 | 0 |
| Case 87 | 14 | 56,197,878  | 56,433,709  | 3 | 2 | 5 | 0 |
| Case 87 | 14 | 56,437,386  | 98,499,656  | 2 | 2 | 4 | 0 |
| Case 87 | 14 | 98,501,431  | 99,075,777  | 3 | 2 | 5 | 0 |
| Case 87 | 14 | 99,078,064  | 107,287,663 | 3 | 1 | 4 | 0 |

|         |    |            |             |   |   |   |   |
|---------|----|------------|-------------|---|---|---|---|
| Case 87 | 15 | 20,034,919 | 69,778,982  | 2 | 2 | 4 | 0 |
| Case 87 | 15 | 69,781,764 | 87,136,493  | 4 | 2 | 6 | 0 |
| Case 87 | 15 | 87,139,933 | 87,139,933  | 3 | 2 | 5 | 0 |
| Case 87 | 15 | 87,146,081 | 88,340,472  | 5 | 2 | 7 | 0 |
| Case 87 | 15 | 88,340,804 | 97,557,339  | 4 | 2 | 6 | 0 |
| Case 87 | 15 | 97,559,785 | 98,722,005  | 5 | 2 | 7 | 0 |
| Case 87 | 15 | 98,725,702 | 99,670,265  | 4 | 2 | 6 | 0 |
| Case 87 | 15 | 99,670,278 | 99,672,099  | 3 | 2 | 5 | 0 |
| Case 87 | 15 | 99,672,138 | 102,461,162 | 4 | 2 | 6 | 0 |
| Case 87 | 16 | 88,165     | 1,695,776   | 4 | 0 | 4 | 1 |
| Case 87 | 16 | 1,703,067  | 1,799,407   | 2 | 0 | 2 | 1 |
| Case 87 | 16 | 1,802,232  | 1,824,075   | 1 | 0 | 1 | 0 |
| Case 87 | 16 | 1,825,067  | 1,838,696   | 2 | 0 | 2 | 1 |
| Case 87 | 16 | 1,839,023  | 1,867,040   | 1 | 0 | 1 | 0 |
| Case 87 | 16 | 1,867,236  | 2,871,555   | 4 | 0 | 4 | 1 |
| Case 87 | 16 | 2,873,313  | 3,021,806   | 5 | 0 | 5 | 1 |
| Case 87 | 16 | 3,022,261  | 3,100,388   | 4 | 0 | 4 | 1 |
| Case 87 | 16 | 3,100,427  | 3,165,683   | 5 | 0 | 5 | 1 |
| Case 87 | 16 | 3,165,845  | 3,962,620   | 4 | 0 | 4 | 1 |
| Case 87 | 16 | 3,967,411  | 4,384,871   | 5 | 0 | 5 | 1 |
| Case 87 | 16 | 4,384,961  | 4,940,288   | 4 | 0 | 4 | 1 |
| Case 87 | 16 | 4,940,302  | 7,975,357   | 5 | 0 | 5 | 1 |
| Case 87 | 16 | 7,979,669  | 8,553,132   | 3 | 0 | 3 | 1 |
| Case 87 | 16 | 8,558,352  | 8,906,958   | 4 | 0 | 4 | 1 |
| Case 87 | 16 | 8,907,025  | 14,566,432  | 5 | 0 | 5 | 1 |
| Case 87 | 16 | 14,576,672 | 15,501,701  | 4 | 0 | 4 | 1 |
| Case 87 | 16 | 15,512,575 | 19,474,639  | 5 | 0 | 5 | 1 |
| Case 87 | 16 | 19,474,663 | 19,884,011  | 4 | 0 | 4 | 1 |
| Case 87 | 16 | 19,888,106 | 20,324,401  | 5 | 0 | 5 | 1 |
| Case 87 | 16 | 20,326,407 | 21,211,138  | 4 | 0 | 4 | 1 |
| Case 87 | 16 | 21,212,697 | 23,010,921  | 5 | 0 | 5 | 1 |
| Case 87 | 16 | 23,013,555 | 23,690,573  | 4 | 0 | 4 | 1 |
| Case 87 | 16 | 23,693,443 | 27,461,521  | 5 | 0 | 5 | 1 |
| Case 87 | 16 | 27,467,337 | 27,827,381  | 4 | 0 | 4 | 1 |
| Case 87 | 16 | 27,827,858 | 28,329,398  | 5 | 0 | 5 | 1 |
| Case 87 | 16 | 28,334,994 | 28,933,468  | 4 | 0 | 4 | 1 |
| Case 87 | 16 | 28,937,275 | 30,038,042  | 5 | 0 | 5 | 1 |
| Case 87 | 16 | 30,039,678 | 31,382,999  | 4 | 0 | 4 | 1 |
| Case 87 | 16 | 31,383,038 | 31,659,915  | 5 | 0 | 5 | 1 |
| Case 87 | 16 | 31,660,427 | 32,137,965  | 4 | 0 | 4 | 1 |
| Case 87 | 16 | 32,257,633 | 35,285,582  | 5 | 0 | 5 | 1 |
| Case 87 | 16 | 46,450,037 | 51,357,210  | 5 | 0 | 5 | 1 |
| Case 87 | 16 | 51,357,482 | 52,430,136  | 6 | 0 | 6 | 1 |
| Case 87 | 16 | 52,431,954 | 53,875,016  | 5 | 0 | 5 | 1 |
| Case 87 | 16 | 53,876,444 | 55,359,026  | 6 | 0 | 6 | 1 |
| Case 87 | 16 | 55,359,029 | 58,331,773  | 5 | 0 | 5 | 1 |
| Case 87 | 16 | 58,335,379 | 59,411,607  | 6 | 0 | 6 | 1 |
| Case 87 | 16 | 59,419,461 | 59,702,793  | 5 | 0 | 5 | 1 |
| Case 87 | 16 | 59,706,248 | 59,884,620  | 6 | 0 | 6 | 1 |
| Case 87 | 16 | 59,886,183 | 60,764,767  | 5 | 0 | 5 | 1 |
| Case 87 | 16 | 60,767,611 | 61,850,293  | 6 | 0 | 6 | 1 |
| Case 87 | 16 | 61,851,413 | 63,518,506  | 5 | 0 | 5 | 1 |
| Case 87 | 16 | 63,520,218 | 64,972,164  | 6 | 0 | 6 | 1 |
| Case 87 | 16 | 64,972,773 | 73,791,210  | 5 | 0 | 5 | 1 |
| Case 87 | 16 | 73,791,488 | 74,276,961  | 6 | 0 | 6 | 1 |
| Case 87 | 16 | 74,277,844 | 75,872,464  | 5 | 0 | 5 | 1 |
| Case 87 | 16 | 75,894,212 | 76,279,001  | 6 | 0 | 6 | 1 |
| Case 87 | 16 | 76,281,066 | 77,163,008  | 5 | 0 | 5 | 1 |
| Case 87 | 16 | 77,167,618 | 77,323,247  | 6 | 0 | 6 | 1 |
| Case 87 | 16 | 77,323,248 | 79,816,194  | 5 | 0 | 5 | 1 |
| Case 87 | 16 | 79,816,247 | 80,205,926  | 6 | 0 | 6 | 1 |

|         |    |            |            |   |   |   |   |
|---------|----|------------|------------|---|---|---|---|
| Case 87 | 16 | 80,220,495 | 90,274,695 | 5 | 0 | 5 | 1 |
| Case 87 | 17 | 11,885     | 1,700,082  | 5 | 0 | 5 | 1 |
| Case 87 | 17 | 1,703,153  | 14,370,851 | 4 | 0 | 4 | 1 |
| Case 87 | 17 | 14,371,001 | 15,878,256 | 5 | 0 | 5 | 1 |
| Case 87 | 17 | 15,878,534 | 18,911,386 | 4 | 0 | 4 | 1 |
| Case 87 | 17 | 18,914,445 | 21,560,916 | 5 | 0 | 5 | 1 |
| Case 87 | 17 | 21,707,060 | 22,242,355 | 6 | 0 | 6 | 1 |
| Case 87 | 17 | 25,268,142 | 27,969,220 | 6 | 0 | 6 | 1 |
| Case 87 | 17 | 27,998,978 | 36,485,571 | 4 | 0 | 4 | 1 |
| Case 87 | 17 | 36,485,605 | 37,047,658 | 5 | 0 | 5 | 1 |
| Case 87 | 17 | 37,049,116 | 37,795,660 | 4 | 0 | 4 | 1 |
| Case 87 | 17 | 37,801,415 | 37,872,607 | 5 | 0 | 5 | 1 |
| Case 87 | 17 | 37,872,647 | 38,064,469 | 6 | 0 | 6 | 1 |
| Case 87 | 17 | 38,066,146 | 41,301,709 | 5 | 0 | 5 | 1 |
| Case 87 | 17 | 41,321,910 | 53,908,942 | 4 | 0 | 4 | 1 |
| Case 87 | 17 | 53,909,089 | 54,578,920 | 3 | 0 | 3 | 1 |
| Case 87 | 17 | 54,580,408 | 54,858,402 | 4 | 0 | 4 | 1 |
| Case 87 | 17 | 54,859,188 | 55,112,291 | 3 | 0 | 3 | 1 |
| Case 87 | 17 | 55,115,189 | 56,277,106 | 4 | 0 | 4 | 1 |
| Case 87 | 17 | 56,277,146 | 59,343,880 | 3 | 0 | 3 | 1 |
| Case 87 | 17 | 59,345,321 | 59,658,544 | 4 | 0 | 4 | 1 |
| Case 87 | 17 | 59,661,552 | 60,523,455 | 3 | 0 | 3 | 1 |
| Case 87 | 17 | 60,525,047 | 60,876,467 | 4 | 0 | 4 | 1 |
| Case 87 | 17 | 60,879,026 | 61,496,471 | 3 | 0 | 3 | 1 |
| Case 87 | 17 | 61,498,222 | 61,615,545 | 4 | 0 | 4 | 1 |
| Case 87 | 17 | 61,615,587 | 61,892,969 | 3 | 0 | 3 | 1 |
| Case 87 | 17 | 61,895,165 | 62,060,718 | 4 | 0 | 4 | 1 |
| Case 87 | 17 | 62,067,353 | 63,112,344 | 3 | 0 | 3 | 1 |
| Case 87 | 17 | 63,113,160 | 63,621,104 | 4 | 0 | 4 | 1 |
| Case 87 | 17 | 63,629,238 | 64,197,259 | 3 | 0 | 3 | 1 |
| Case 87 | 17 | 64,197,405 | 65,052,396 | 4 | 0 | 4 | 1 |
| Case 87 | 17 | 65,052,605 | 65,438,177 | 3 | 0 | 3 | 1 |
| Case 87 | 17 | 65,445,256 | 65,651,144 | 4 | 0 | 4 | 1 |
| Case 87 | 17 | 65,653,400 | 66,250,655 | 3 | 0 | 3 | 1 |
| Case 87 | 17 | 66,253,003 | 66,714,228 | 4 | 0 | 4 | 1 |
| Case 87 | 17 | 66,714,282 | 70,136,055 | 3 | 0 | 3 | 1 |
| Case 87 | 17 | 70,137,681 | 70,913,648 | 4 | 0 | 4 | 1 |
| Case 87 | 17 | 70,915,599 | 71,468,356 | 3 | 0 | 3 | 1 |
| Case 87 | 17 | 71,477,731 | 72,233,485 | 4 | 0 | 4 | 1 |
| Case 87 | 17 | 72,233,559 | 72,350,663 | 3 | 0 | 3 | 1 |
| Case 87 | 17 | 72,350,664 | 72,584,662 | 4 | 0 | 4 | 1 |
| Case 87 | 17 | 72,584,704 | 74,382,590 | 3 | 0 | 3 | 1 |
| Case 87 | 17 | 74,383,348 | 74,710,783 | 4 | 0 | 4 | 1 |
| Case 87 | 17 | 74,712,886 | 74,794,457 | 3 | 0 | 3 | 1 |
| Case 87 | 17 | 74,816,422 | 75,987,290 | 4 | 0 | 4 | 1 |
| Case 87 | 17 | 75,989,901 | 76,210,207 | 3 | 0 | 3 | 1 |
| Case 87 | 17 | 76,210,422 | 76,802,344 | 4 | 0 | 4 | 1 |
| Case 87 | 17 | 76,802,648 | 77,083,619 | 3 | 0 | 3 | 1 |
| Case 87 | 17 | 77,084,654 | 77,674,058 | 4 | 0 | 4 | 1 |
| Case 87 | 17 | 77,686,881 | 79,429,852 | 3 | 0 | 3 | 1 |
| Case 87 | 17 | 79,429,896 | 79,579,230 | 4 | 0 | 4 | 1 |
| Case 87 | 17 | 79,580,437 | 81,060,040 | 3 | 0 | 3 | 1 |
| Case 87 | 18 | 87,505     | 2,336,089  | 6 | 0 | 6 | 1 |
| Case 87 | 18 | 2,339,141  | 4,673,119  | 7 | 0 | 7 | 1 |
| Case 87 | 18 | 4,676,964  | 4,676,964  | 2 | 0 | 2 | 1 |
| Case 87 | 18 | 4,677,933  | 4,677,933  | 4 | 0 | 4 | 1 |
| Case 87 | 18 | 4,683,148  | 4,694,751  | 5 | 0 | 5 | 1 |
| Case 87 | 18 | 4,710,695  | 15,330,525 | 6 | 0 | 6 | 1 |
| Case 87 | 18 | 15,375,878 | 15,375,878 | 6 | 1 | 7 | 0 |
| Case 87 | 18 | 18,520,354 | 25,066,437 | 6 | 1 | 7 | 0 |
| Case 87 | 18 | 25,067,055 | 25,426,499 | 7 | 0 | 7 | 1 |

|         |    |            |            |   |   |   |   |
|---------|----|------------|------------|---|---|---|---|
| Case 87 | 18 | 25,437,752 | 25,437,752 | 2 | 0 | 2 | 1 |
| Case 87 | 18 | 25,440,258 | 25,926,059 | 4 | 0 | 4 | 1 |
| Case 87 | 18 | 25,928,664 | 26,552,808 | 5 | 0 | 5 | 1 |
| Case 87 | 18 | 26,554,711 | 27,572,034 | 4 | 0 | 4 | 1 |
| Case 87 | 18 | 27,580,903 | 27,862,545 | 2 | 0 | 2 | 1 |
| Case 87 | 18 | 27,869,383 | 33,928,038 | 3 | 0 | 3 | 1 |
| Case 87 | 18 | 33,928,144 | 34,146,384 | 4 | 0 | 4 | 1 |
| Case 87 | 18 | 34,147,295 | 37,172,774 | 5 | 0 | 5 | 1 |
| Case 87 | 18 | 37,192,581 | 37,194,499 | 4 | 0 | 4 | 1 |
| Case 87 | 18 | 37,200,183 | 37,409,962 | 2 | 0 | 2 | 1 |
| Case 87 | 18 | 37,412,228 | 39,132,894 | 1 | 0 | 1 | 0 |
| Case 87 | 18 | 39,135,598 | 39,484,211 | 3 | 0 | 3 | 1 |
| Case 87 | 18 | 39,485,540 | 41,149,817 | 2 | 0 | 2 | 1 |
| Case 87 | 18 | 41,152,727 | 42,055,478 | 0 | 0 | 0 | 0 |
| Case 87 | 18 | 42,077,844 | 42,210,808 | 2 | 0 | 2 | 1 |
| Case 87 | 18 | 42,230,172 | 43,438,739 | 3 | 0 | 3 | 1 |
| Case 87 | 18 | 43,440,233 | 43,833,689 | 2 | 0 | 2 | 1 |
| Case 87 | 18 | 43,834,634 | 44,370,518 | 3 | 0 | 3 | 1 |
| Case 87 | 18 | 44,383,675 | 44,541,614 | 2 | 0 | 2 | 1 |
| Case 87 | 18 | 44,541,915 | 44,590,473 | 3 | 0 | 3 | 1 |
| Case 87 | 18 | 44,593,458 | 44,808,676 | 2 | 0 | 2 | 1 |
| Case 87 | 18 | 44,814,355 | 45,283,049 | 3 | 0 | 3 | 1 |
| Case 87 | 18 | 45,285,683 | 45,432,593 | 2 | 0 | 2 | 1 |
| Case 87 | 18 | 45,433,995 | 46,623,780 | 3 | 0 | 3 | 1 |
| Case 87 | 18 | 46,623,854 | 46,976,586 | 2 | 0 | 2 | 1 |
| Case 87 | 18 | 46,987,640 | 47,786,639 | 3 | 0 | 3 | 1 |
| Case 87 | 18 | 47,787,602 | 47,788,535 | 2 | 0 | 2 | 1 |
| Case 87 | 18 | 47,791,995 | 47,840,706 | 3 | 0 | 3 | 1 |
| Case 87 | 18 | 47,841,892 | 47,957,621 | 2 | 0 | 2 | 1 |
| Case 87 | 18 | 47,959,099 | 48,447,090 | 3 | 0 | 3 | 1 |
| Case 87 | 18 | 48,447,462 | 48,510,696 | 2 | 0 | 2 | 1 |
| Case 87 | 18 | 48,510,795 | 49,173,330 | 3 | 0 | 3 | 1 |
| Case 87 | 18 | 49,176,373 | 49,360,609 | 2 | 0 | 2 | 1 |
| Case 87 | 18 | 49,365,021 | 49,665,498 | 3 | 0 | 3 | 1 |
| Case 87 | 18 | 49,675,410 | 54,693,531 | 2 | 0 | 2 | 1 |
| Case 87 | 18 | 54,694,151 | 55,269,699 | 3 | 0 | 3 | 1 |
| Case 87 | 18 | 55,270,423 | 55,315,751 | 2 | 0 | 2 | 1 |
| Case 87 | 18 | 55,315,959 | 56,348,411 | 3 | 0 | 3 | 1 |
| Case 87 | 18 | 56,350,396 | 56,422,868 | 2 | 0 | 2 | 1 |
| Case 87 | 18 | 56,424,837 | 57,687,573 | 3 | 0 | 3 | 1 |
| Case 87 | 18 | 57,688,169 | 58,035,204 | 2 | 0 | 2 | 1 |
| Case 87 | 18 | 58,036,503 | 58,051,263 | 3 | 0 | 3 | 1 |
| Case 87 | 18 | 58,051,294 | 58,872,074 | 2 | 0 | 2 | 1 |
| Case 87 | 18 | 58,876,416 | 59,579,209 | 3 | 0 | 3 | 1 |
| Case 87 | 18 | 59,580,679 | 59,984,822 | 2 | 0 | 2 | 1 |
| Case 87 | 18 | 59,997,434 | 60,512,959 | 3 | 0 | 3 | 1 |
| Case 87 | 18 | 60,514,169 | 60,590,894 | 2 | 0 | 2 | 1 |
| Case 87 | 18 | 60,593,492 | 61,022,115 | 3 | 0 | 3 | 1 |
| Case 87 | 18 | 61,022,634 | 61,160,320 | 2 | 0 | 2 | 1 |
| Case 87 | 18 | 61,160,598 | 61,264,298 | 3 | 0 | 3 | 1 |
| Case 87 | 18 | 61,264,468 | 61,763,444 | 2 | 0 | 2 | 1 |
| Case 87 | 18 | 61,765,487 | 61,871,398 | 3 | 0 | 3 | 1 |
| Case 87 | 18 | 61,875,586 | 63,094,505 | 2 | 0 | 2 | 1 |
| Case 87 | 18 | 63,104,519 | 74,568,937 | 4 | 0 | 4 | 1 |
| Case 87 | 18 | 74,580,780 | 74,682,214 | 2 | 0 | 2 | 1 |
| Case 87 | 18 | 74,683,389 | 74,896,814 | 3 | 0 | 3 | 1 |
| Case 87 | 18 | 74,896,865 | 74,947,450 | 2 | 0 | 2 | 1 |
| Case 87 | 18 | 74,948,824 | 75,136,413 | 3 | 0 | 3 | 1 |
| Case 87 | 18 | 75,136,990 | 75,331,597 | 2 | 0 | 2 | 1 |
| Case 87 | 18 | 75,333,250 | 75,390,410 | 3 | 0 | 3 | 1 |
| Case 87 | 18 | 75,390,648 | 75,468,705 | 2 | 0 | 2 | 1 |

|         |    |            |            |   |   |   |   |
|---------|----|------------|------------|---|---|---|---|
| Case 87 | 18 | 75,470,181 | 75,930,831 | 3 | 0 | 3 | 1 |
| Case 87 | 18 | 75,933,383 | 76,136,708 | 2 | 0 | 2 | 1 |
| Case 87 | 18 | 76,143,140 | 76,756,988 | 3 | 0 | 3 | 1 |
| Case 87 | 18 | 76,757,146 | 77,138,035 | 2 | 0 | 2 | 1 |
| Case 87 | 18 | 77,138,068 | 77,797,492 | 3 | 0 | 3 | 1 |
| Case 87 | 18 | 77,798,569 | 78,015,180 | 2 | 0 | 2 | 1 |
| Case 87 | 19 | 260,912    | 9,395,584  | 4 | 0 | 4 | 1 |
| Case 87 | 19 | 9,401,159  | 9,912,917  | 3 | 0 | 3 | 1 |
| Case 87 | 19 | 9,918,229  | 11,881,346 | 4 | 0 | 4 | 1 |
| Case 87 | 19 | 11,881,451 | 11,929,999 | 3 | 0 | 3 | 1 |
| Case 87 | 19 | 11,930,639 | 12,040,283 | 4 | 0 | 4 | 1 |
| Case 87 | 19 | 12,046,336 | 12,187,907 | 3 | 0 | 3 | 1 |
| Case 87 | 19 | 12,188,266 | 12,296,941 | 4 | 0 | 4 | 1 |
| Case 87 | 19 | 12,296,974 | 12,577,302 | 3 | 0 | 3 | 1 |
| Case 87 | 19 | 12,581,063 | 21,719,213 | 4 | 0 | 4 | 1 |
| Case 87 | 19 | 21,719,235 | 21,720,098 | 1 | 1 | 2 | 0 |
| Case 87 | 19 | 21,720,803 | 24,629,285 | 4 | 0 | 4 | 1 |
| Case 87 | 19 | 27,732,159 | 32,779,619 | 4 | 0 | 4 | 1 |
| Case 87 | 19 | 32,783,217 | 33,714,562 | 3 | 2 | 5 | 0 |
| Case 87 | 19 | 33,722,682 | 34,740,600 | 3 | 3 | 6 | 0 |
| Case 87 | 19 | 34,742,705 | 41,310,609 | 3 | 2 | 5 | 0 |
| Case 87 | 19 | 41,314,720 | 41,314,720 | 3 | 0 | 3 | 1 |
| Case 87 | 19 | 41,318,306 | 43,433,794 | 4 | 0 | 4 | 1 |
| Case 87 | 19 | 43,435,966 | 44,068,193 | 4 | 1 | 5 | 0 |
| Case 87 | 19 | 44,068,575 | 44,853,707 | 3 | 1 | 4 | 0 |
| Case 87 | 19 | 44,855,873 | 46,974,190 | 4 | 1 | 5 | 0 |
| Case 87 | 19 | 46,974,306 | 48,472,474 | 3 | 2 | 5 | 0 |
| Case 87 | 19 | 48,475,932 | 49,089,795 | 4 | 1 | 5 | 0 |
| Case 87 | 19 | 49,090,527 | 50,666,351 | 3 | 1 | 4 | 0 |
| Case 87 | 19 | 50,672,518 | 50,771,409 | 3 | 2 | 5 | 0 |
| Case 87 | 19 | 50,771,512 | 51,009,768 | 2 | 2 | 4 | 0 |
| Case 87 | 19 | 51,010,939 | 51,379,901 | 3 | 2 | 5 | 0 |
| Case 87 | 19 | 51,379,948 | 51,759,525 | 2 | 2 | 4 | 0 |
| Case 87 | 19 | 51,759,861 | 52,376,207 | 3 | 2 | 5 | 0 |
| Case 87 | 19 | 52,376,226 | 54,017,258 | 2 | 2 | 4 | 0 |
| Case 87 | 19 | 54,020,343 | 55,362,859 | 3 | 2 | 5 | 0 |
| Case 87 | 19 | 55,363,599 | 56,424,323 | 2 | 2 | 4 | 0 |
| Case 87 | 19 | 56,424,395 | 56,900,486 | 3 | 2 | 5 | 0 |
| Case 87 | 19 | 56,901,457 | 57,133,862 | 2 | 2 | 4 | 0 |
| Case 87 | 19 | 57,135,023 | 57,646,218 | 3 | 2 | 5 | 0 |
| Case 87 | 19 | 57,646,318 | 59,097,160 | 2 | 2 | 4 | 0 |
| Case 87 | 20 | 63,244     | 2,261,387  | 3 | 2 | 5 | 0 |
| Case 87 | 20 | 2,262,636  | 2,278,553  | 2 | 2 | 4 | 0 |
| Case 87 | 20 | 2,286,057  | 2,440,652  | 2 | 1 | 3 | 0 |
| Case 87 | 20 | 2,440,845  | 3,838,807  | 3 | 2 | 5 | 0 |
| Case 87 | 20 | 3,842,057  | 4,079,151  | 2 | 2 | 4 | 0 |
| Case 87 | 20 | 4,079,223  | 5,718,030  | 3 | 2 | 5 | 0 |
| Case 87 | 20 | 5,727,600  | 18,310,767 | 2 | 2 | 4 | 0 |
| Case 87 | 20 | 18,328,816 | 21,301,991 | 2 | 1 | 3 | 0 |
| Case 87 | 20 | 21,313,044 | 25,434,163 | 3 | 2 | 5 | 0 |
| Case 87 | 20 | 25,436,385 | 25,657,649 | 2 | 2 | 4 | 0 |
| Case 87 | 20 | 25,657,745 | 26,293,985 | 3 | 2 | 5 | 0 |
| Case 87 | 20 | 29,425,357 | 33,574,751 | 3 | 2 | 5 | 0 |
| Case 87 | 20 | 33,574,765 | 35,767,216 | 2 | 2 | 4 | 0 |
| Case 87 | 20 | 35,769,592 | 39,663,329 | 3 | 2 | 5 | 0 |
| Case 87 | 20 | 39,672,618 | 40,054,766 | 2 | 2 | 4 | 0 |
| Case 87 | 20 | 40,061,656 | 40,849,546 | 3 | 2 | 5 | 0 |
| Case 87 | 20 | 40,859,050 | 41,266,942 | 4 | 2 | 6 | 0 |
| Case 87 | 20 | 41,269,321 | 41,351,028 | 3 | 2 | 5 | 0 |
| Case 87 | 20 | 41,353,289 | 43,613,825 | 4 | 2 | 6 | 0 |
| Case 87 | 20 | 43,625,927 | 43,695,762 | 3 | 2 | 5 | 0 |

|         |    |            |            |   |   |   |   |
|---------|----|------------|------------|---|---|---|---|
| Case 87 | 20 | 43,701,355 | 43,945,481 | 2 | 2 | 4 | 0 |
| Case 87 | 20 | 43,945,487 | 44,356,051 | 3 | 2 | 5 | 0 |
| Case 87 | 20 | 44,356,194 | 46,514,097 | 4 | 2 | 6 | 0 |
| Case 87 | 20 | 46,516,716 | 49,746,325 | 3 | 2 | 5 | 0 |
| Case 87 | 20 | 49,758,590 | 50,262,763 | 4 | 2 | 6 | 0 |
| Case 87 | 20 | 50,264,643 | 53,883,417 | 5 | 2 | 7 | 0 |
| Case 87 | 20 | 53,896,038 | 54,379,033 | 6 | 1 | 7 | 0 |
| Case 87 | 20 | 54,379,143 | 54,751,363 | 5 | 2 | 7 | 0 |
| Case 87 | 20 | 54,752,084 | 62,782,082 | 3 | 2 | 5 | 0 |
| Case 87 | 20 | 62,786,928 | 62,948,788 | 4 | 2 | 6 | 0 |
| Case 87 | 21 | 10,827,533 | 10,971,337 | 3 | 0 | 3 | 1 |
| Case 87 | 21 | 14,368,320 | 18,733,811 | 3 | 0 | 3 | 1 |
| Case 87 | 21 | 18,735,609 | 18,918,578 | 4 | 0 | 4 | 1 |
| Case 87 | 21 | 18,921,821 | 32,251,674 | 3 | 0 | 3 | 1 |
| Case 87 | 21 | 32,252,137 | 32,536,256 | 4 | 0 | 4 | 1 |
| Case 87 | 21 | 32,537,308 | 33,146,821 | 3 | 0 | 3 | 1 |
| Case 87 | 21 | 33,151,085 | 33,424,532 | 4 | 0 | 4 | 1 |
| Case 87 | 21 | 33,426,886 | 34,292,163 | 3 | 0 | 3 | 1 |
| Case 87 | 21 | 34,297,775 | 34,521,087 | 4 | 0 | 4 | 1 |
| Case 87 | 21 | 34,525,104 | 35,200,374 | 3 | 0 | 3 | 1 |
| Case 87 | 21 | 35,201,030 | 35,254,293 | 4 | 0 | 4 | 1 |
| Case 87 | 21 | 35,260,481 | 36,744,959 | 3 | 0 | 3 | 1 |
| Case 87 | 21 | 36,749,232 | 37,229,471 | 4 | 0 | 4 | 1 |
| Case 87 | 21 | 37,247,303 | 38,881,289 | 3 | 0 | 3 | 1 |
| Case 87 | 21 | 38,884,218 | 39,356,734 | 4 | 0 | 4 | 1 |
| Case 87 | 21 | 39,357,383 | 40,016,124 | 3 | 0 | 3 | 1 |
| Case 87 | 21 | 40,018,639 | 40,136,974 | 4 | 0 | 4 | 1 |
| Case 87 | 21 | 40,139,707 | 40,289,454 | 3 | 0 | 3 | 1 |
| Case 87 | 21 | 40,291,413 | 40,527,311 | 4 | 0 | 4 | 1 |
| Case 87 | 21 | 40,547,310 | 41,173,714 | 3 | 0 | 3 | 1 |
| Case 87 | 21 | 41,182,794 | 41,386,931 | 4 | 0 | 4 | 1 |
| Case 87 | 21 | 41,390,971 | 43,420,555 | 3 | 0 | 3 | 1 |
| Case 87 | 21 | 43,422,525 | 43,733,628 | 4 | 0 | 4 | 1 |
| Case 87 | 21 | 43,735,471 | 44,438,248 | 3 | 0 | 3 | 1 |
| Case 87 | 21 | 44,438,266 | 44,825,683 | 4 | 0 | 4 | 1 |
| Case 87 | 21 | 44,828,031 | 48,100,155 | 3 | 0 | 3 | 1 |
| Case 87 | 22 | 16,114,244 | 19,159,015 | 3 | 2 | 5 | 0 |
| Case 87 | 22 | 19,160,297 | 19,309,694 | 2 | 2 | 4 | 0 |
| Case 87 | 22 | 19,310,812 | 19,980,300 | 3 | 2 | 5 | 0 |
| Case 87 | 22 | 19,983,014 | 20,127,002 | 2 | 2 | 4 | 0 |
| Case 87 | 22 | 20,127,554 | 21,383,420 | 3 | 2 | 5 | 0 |
| Case 87 | 22 | 21,383,429 | 21,997,070 | 2 | 2 | 4 | 0 |
| Case 87 | 22 | 21,997,574 | 23,826,675 | 3 | 2 | 5 | 0 |
| Case 87 | 22 | 23,835,039 | 23,930,279 | 4 | 2 | 6 | 0 |
| Case 87 | 22 | 23,931,845 | 24,339,634 | 3 | 2 | 5 | 0 |
| Case 87 | 22 | 24,381,773 | 24,717,518 | 2 | 2 | 4 | 0 |
| Case 87 | 22 | 24,717,548 | 25,792,267 | 3 | 2 | 5 | 0 |
| Case 87 | 22 | 25,809,371 | 26,278,427 | 3 | 0 | 3 | 1 |
| Case 87 | 22 | 26,278,468 | 26,666,246 | 4 | 0 | 4 | 1 |
| Case 87 | 22 | 26,666,611 | 27,003,985 | 3 | 0 | 3 | 1 |
| Case 87 | 22 | 27,004,964 | 27,306,830 | 4 | 0 | 4 | 1 |
| Case 87 | 22 | 27,320,076 | 27,486,771 | 3 | 0 | 3 | 1 |
| Case 87 | 22 | 27,487,232 | 27,715,293 | 4 | 0 | 4 | 1 |
| Case 87 | 22 | 27,715,760 | 27,801,546 | 3 | 0 | 3 | 1 |
| Case 87 | 22 | 27,802,721 | 28,206,912 | 4 | 0 | 4 | 1 |
| Case 87 | 22 | 28,217,319 | 29,726,624 | 3 | 0 | 3 | 1 |
| Case 87 | 22 | 29,735,056 | 29,904,354 | 4 | 0 | 4 | 1 |
| Case 87 | 22 | 29,904,509 | 30,765,486 | 3 | 2 | 5 | 0 |
| Case 87 | 22 | 30,766,366 | 30,906,194 | 2 | 2 | 4 | 0 |
| Case 87 | 22 | 30,909,767 | 31,829,917 | 3 | 2 | 5 | 0 |
| Case 87 | 22 | 31,830,351 | 32,506,050 | 2 | 2 | 4 | 0 |



|         |    |            |            |   |   |   |   |
|---------|----|------------|------------|---|---|---|---|
| Case 87 | 22 | 32,506,051 | 37,268,367 | 3 | 2 | 5 | 0 |
| Case 87 | 22 | 37,268,444 | 37,496,847 | 2 | 2 | 4 | 0 |
| Case 87 | 22 | 37,497,593 | 37,902,177 | 3 | 2 | 5 | 0 |
| Case 87 | 22 | 37,902,377 | 38,371,328 | 2 | 2 | 4 | 0 |
| Case 87 | 22 | 38,373,967 | 43,716,324 | 3 | 2 | 5 | 0 |
| Case 87 | 22 | 43,716,971 | 44,219,572 | 2 | 2 | 4 | 0 |
| Case 87 | 22 | 44,219,716 | 46,557,161 | 3 | 2 | 5 | 0 |
| Case 87 | 22 | 46,561,566 | 47,321,120 | 2 | 2 | 4 | 0 |
| Case 87 | 22 | 47,323,417 | 48,214,812 | 3 | 2 | 5 | 0 |
| Case 87 | 22 | 48,216,822 | 48,892,314 | 3 | 0 | 3 | 1 |
| Case 87 | 22 | 48,895,339 | 49,115,890 | 4 | 0 | 4 | 1 |
| Case 87 | 22 | 49,118,598 | 49,797,810 | 3 | 0 | 3 | 1 |
| Case 87 | 22 | 49,798,011 | 49,873,588 | 4 | 0 | 4 | 1 |
| Case 87 | 22 | 49,874,509 | 51,066,921 | 3 | 0 | 3 | 1 |
| Case 87 | 22 | 51,068,560 | 51,195,728 | 2 | 2 | 4 | 0 |
| Case 88 | 1  | 82,154     | 1,439,671  | 2 | 1 | 3 | 0 |
| Case 88 | 1  | 1,447,325  | 1,959,698  | 1 | 1 | 2 | 0 |
| Case 88 | 1  | 1,959,730  | 2,905,605  | 2 | 1 | 3 | 0 |
| Case 88 | 1  | 2,909,170  | 3,424,379  | 2 | 2 | 4 | 0 |
| Case 88 | 1  | 3,424,388  | 3,706,538  | 2 | 1 | 3 | 0 |
| Case 88 | 1  | 3,709,412  | 5,692,373  | 1 | 1 | 2 | 0 |
| Case 88 | 1  | 5,692,728  | 6,314,748  | 2 | 1 | 3 | 0 |
| Case 88 | 1  | 6,314,822  | 7,897,136  | 1 | 1 | 2 | 0 |
| Case 88 | 1  | 7,897,189  | 9,170,878  | 1 | 0 | 1 | 0 |
| Case 88 | 1  | 9,171,336  | 9,833,335  | 1 | 1 | 2 | 0 |
| Case 88 | 1  | 9,833,451  | 10,360,994 | 0 | 0 | 0 | 0 |
| Case 88 | 1  | 10,363,309 | 15,726,566 | 1 | 1 | 2 | 0 |
| Case 88 | 1  | 15,726,791 | 16,255,562 | 1 | 0 | 1 | 0 |
| Case 88 | 1  | 16,255,644 | 17,961,392 | 1 | 1 | 2 | 0 |
| Case 88 | 1  | 17,961,432 | 18,817,181 | 2 | 1 | 3 | 0 |
| Case 88 | 1  | 18,821,416 | 20,851,834 | 1 | 1 | 2 | 0 |
| Case 88 | 1  | 20,853,195 | 21,797,221 | 1 | 0 | 1 | 0 |
| Case 88 | 1  | 21,799,413 | 23,429,122 | 1 | 1 | 2 | 0 |
| Case 88 | 1  | 23,431,777 | 24,377,326 | 1 | 0 | 1 | 0 |
| Case 88 | 1  | 24,379,601 | 24,488,450 | 1 | 1 | 2 | 0 |
| Case 88 | 1  | 24,495,722 | 28,293,641 | 1 | 0 | 1 | 0 |
| Case 88 | 1  | 28,298,951 | 29,519,778 | 0 | 0 | 0 | 0 |
| Case 88 | 1  | 29,520,542 | 32,279,871 | 1 | 1 | 2 | 0 |
| Case 88 | 1  | 32,279,890 | 33,543,052 | 1 | 0 | 1 | 0 |
| Case 88 | 1  | 33,547,930 | 35,379,119 | 1 | 1 | 2 | 0 |
| Case 88 | 1  | 35,379,493 | 35,899,006 | 0 | 0 | 0 | 0 |
| Case 88 | 1  | 35,900,520 | 36,769,380 | 1 | 0 | 1 | 0 |
| Case 88 | 1  | 36,769,917 | 39,228,906 | 1 | 1 | 2 | 0 |
| Case 88 | 1  | 39,229,313 | 41,468,787 | 1 | 0 | 1 | 0 |
| Case 88 | 1  | 41,469,666 | 42,857,663 | 1 | 1 | 2 | 0 |
| Case 88 | 1  | 42,864,868 | 43,169,007 | 1 | 0 | 1 | 0 |
| Case 88 | 1  | 43,187,067 | 45,161,845 | 1 | 1 | 2 | 0 |
| Case 88 | 1  | 45,162,818 | 46,865,671 | 1 | 0 | 1 | 0 |
| Case 88 | 1  | 46,870,705 | 47,717,077 | 1 | 1 | 2 | 0 |
| Case 88 | 1  | 47,717,079 | 47,932,550 | 1 | 0 | 1 | 0 |
| Case 88 | 1  | 47,933,238 | 50,945,526 | 1 | 1 | 2 | 0 |
| Case 88 | 1  | 50,966,897 | 53,493,685 | 1 | 0 | 1 | 0 |
| Case 88 | 1  | 53,495,130 | 62,080,668 | 1 | 1 | 2 | 0 |
| Case 88 | 1  | 62,082,162 | 62,703,977 | 0 | 0 | 0 | 0 |
| Case 88 | 1  | 62,704,007 | 62,707,613 | 1 | 1 | 2 | 0 |
| Case 88 | 1  | 62,708,339 | 64,087,444 | 1 | 0 | 1 | 0 |
| Case 88 | 1  | 64,089,400 | 65,324,419 | 1 | 1 | 2 | 0 |
| Case 88 | 1  | 65,325,970 | 65,816,567 | 1 | 0 | 1 | 0 |
| Case 88 | 1  | 65,830,608 | 67,292,585 | 1 | 1 | 2 | 0 |
| Case 88 | 1  | 67,292,666 | 68,152,363 | 1 | 0 | 1 | 0 |
| Case 88 | 1  | 68,154,693 | 70,616,817 | 1 | 1 | 2 | 0 |

|         |   |             |             |   |   |   |   |
|---------|---|-------------|-------------|---|---|---|---|
| Case 88 | 1 | 70,616,830  | 71,100,213  | 1 | 0 | 1 | 0 |
| Case 88 | 1 | 71,100,726  | 76,120,300  | 1 | 1 | 2 | 0 |
| Case 88 | 1 | 76,129,223  | 76,453,857  | 1 | 0 | 1 | 0 |
| Case 88 | 1 | 76,456,329  | 77,958,712  | 1 | 1 | 2 | 0 |
| Case 88 | 1 | 77,959,674  | 78,797,784  | 1 | 0 | 1 | 0 |
| Case 88 | 1 | 78,800,715  | 92,316,682  | 1 | 1 | 2 | 0 |
| Case 88 | 1 | 92,323,809  | 94,026,080  | 1 | 0 | 1 | 0 |
| Case 88 | 1 | 94,026,861  | 98,229,868  | 1 | 1 | 2 | 0 |
| Case 88 | 1 | 98,230,887  | 98,502,340  | 2 | 1 | 3 | 0 |
| Case 88 | 1 | 98,502,934  | 100,286,234 | 1 | 1 | 2 | 0 |
| Case 88 | 1 | 100,292,878 | 100,681,641 | 1 | 0 | 1 | 0 |
| Case 88 | 1 | 100,683,627 | 107,528,432 | 1 | 1 | 2 | 0 |
| Case 88 | 1 | 107,538,505 | 108,203,956 | 2 | 1 | 3 | 0 |
| Case 88 | 1 | 108,205,448 | 109,399,660 | 1 | 1 | 2 | 0 |
| Case 88 | 1 | 109,399,710 | 109,689,314 | 1 | 0 | 1 | 0 |
| Case 88 | 1 | 109,696,056 | 110,650,778 | 1 | 1 | 2 | 0 |
| Case 88 | 1 | 110,653,704 | 110,770,223 | 2 | 1 | 3 | 0 |
| Case 88 | 1 | 110,770,293 | 112,946,359 | 1 | 1 | 2 | 0 |
| Case 88 | 1 | 112,948,319 | 114,438,613 | 1 | 0 | 1 | 0 |
| Case 88 | 1 | 114,438,882 | 114,894,805 | 1 | 1 | 2 | 0 |
| Case 88 | 1 | 114,900,678 | 115,259,550 | 1 | 0 | 1 | 0 |
| Case 88 | 1 | 115,259,599 | 121,346,616 | 1 | 1 | 2 | 0 |
| Case 88 | 1 | 142,649,718 | 149,919,225 | 1 | 1 | 2 | 0 |
| Case 88 | 1 | 149,920,922 | 151,491,318 | 1 | 0 | 1 | 0 |
| Case 88 | 1 | 151,491,411 | 152,080,066 | 1 | 1 | 2 | 0 |
| Case 88 | 1 | 152,080,105 | 152,286,325 | 2 | 1 | 3 | 0 |
| Case 88 | 1 | 152,286,388 | 153,920,564 | 1 | 1 | 2 | 0 |
| Case 88 | 1 | 153,920,692 | 154,346,416 | 1 | 0 | 1 | 0 |
| Case 88 | 1 | 154,346,967 | 155,309,128 | 1 | 1 | 2 | 0 |
| Case 88 | 1 | 155,311,840 | 155,983,710 | 1 | 0 | 1 | 0 |
| Case 88 | 1 | 155,983,869 | 156,498,307 | 1 | 1 | 2 | 0 |
| Case 88 | 1 | 156,499,967 | 156,560,502 | 2 | 1 | 3 | 0 |
| Case 88 | 1 | 156,560,561 | 156,828,358 | 1 | 1 | 2 | 0 |
| Case 88 | 1 | 156,830,218 | 157,095,470 | 2 | 1 | 3 | 0 |
| Case 88 | 1 | 157,095,853 | 173,690,603 | 1 | 1 | 2 | 0 |
| Case 88 | 1 | 173,702,857 | 174,104,743 | 1 | 0 | 1 | 0 |
| Case 88 | 1 | 174,113,342 | 179,078,052 | 1 | 1 | 2 | 0 |
| Case 88 | 1 | 179,078,344 | 179,437,659 | 1 | 0 | 1 | 0 |
| Case 88 | 1 | 179,437,777 | 199,822,974 | 1 | 1 | 2 | 0 |
| Case 88 | 1 | 199,831,111 | 200,672,410 | 1 | 0 | 1 | 0 |
| Case 88 | 1 | 200,672,699 | 201,149,265 | 1 | 1 | 2 | 0 |
| Case 88 | 1 | 201,150,096 | 201,383,643 | 2 | 1 | 3 | 0 |
| Case 88 | 1 | 201,383,725 | 203,131,533 | 1 | 1 | 2 | 0 |
| Case 88 | 1 | 203,132,307 | 203,186,990 | 2 | 1 | 3 | 0 |
| Case 88 | 1 | 203,188,692 | 211,276,828 | 1 | 1 | 2 | 0 |
| Case 88 | 1 | 211,279,739 | 212,614,788 | 1 | 0 | 1 | 0 |
| Case 88 | 1 | 212,617,423 | 220,142,246 | 1 | 1 | 2 | 0 |
| Case 88 | 1 | 220,146,709 | 220,445,641 | 1 | 0 | 1 | 0 |
| Case 88 | 1 | 220,448,330 | 223,959,891 | 1 | 1 | 2 | 0 |
| Case 88 | 1 | 223,959,906 | 224,706,832 | 1 | 0 | 1 | 0 |
| Case 88 | 1 | 224,707,177 | 225,740,216 | 1 | 1 | 2 | 0 |
| Case 88 | 1 | 225,756,293 | 226,514,334 | 1 | 0 | 1 | 0 |
| Case 88 | 1 | 226,521,192 | 227,920,447 | 1 | 1 | 2 | 0 |
| Case 88 | 1 | 227,920,503 | 228,613,026 | 2 | 1 | 3 | 0 |
| Case 88 | 1 | 228,614,224 | 235,095,183 | 1 | 1 | 2 | 0 |
| Case 88 | 1 | 235,095,444 | 236,659,941 | 1 | 0 | 1 | 0 |
| Case 88 | 1 | 236,661,920 | 240,527,918 | 1 | 1 | 2 | 0 |
| Case 88 | 1 | 240,528,954 | 241,161,151 | 1 | 0 | 1 | 0 |
| Case 88 | 1 | 241,161,648 | 241,910,907 | 1 | 1 | 2 | 0 |
| Case 88 | 1 | 241,912,941 | 242,251,696 | 1 | 0 | 1 | 0 |
| Case 88 | 1 | 242,253,024 | 244,480,260 | 1 | 1 | 2 | 0 |

|         |   |             |             |   |   |   |   |
|---------|---|-------------|-------------|---|---|---|---|
| Case 88 | 1 | 244,480,389 | 245,305,530 | 1 | 0 | 1 | 0 |
| Case 88 | 1 | 245,306,896 | 246,479,095 | 1 | 1 | 2 | 0 |
| Case 88 | 1 | 246,483,783 | 247,587,155 | 1 | 0 | 1 | 0 |
| Case 88 | 1 | 247,587,389 | 249,098,988 | 1 | 1 | 2 | 0 |
| Case 88 | 1 | 249,104,349 | 249,218,992 | 2 | 2 | 4 | 0 |
| Case 88 | 2 | 18,674      | 963,334     | 3 | 0 | 3 | 1 |
| Case 88 | 2 | 970,417     | 20,791,125  | 2 | 0 | 2 | 1 |
| Case 88 | 2 | 20,794,079  | 21,260,127  | 3 | 0 | 3 | 1 |
| Case 88 | 2 | 21,260,136  | 23,174,557  | 2 | 0 | 2 | 1 |
| Case 88 | 2 | 23,175,970  | 23,767,746  | 3 | 0 | 3 | 1 |
| Case 88 | 2 | 23,770,465  | 23,980,848  | 2 | 0 | 2 | 1 |
| Case 88 | 2 | 23,982,378  | 24,655,725  | 1 | 0 | 1 | 0 |
| Case 88 | 2 | 24,658,162  | 25,754,393  | 2 | 0 | 2 | 1 |
| Case 88 | 2 | 25,754,408  | 26,533,735  | 1 | 0 | 1 | 0 |
| Case 88 | 2 | 26,533,808  | 31,085,727  | 2 | 0 | 2 | 1 |
| Case 88 | 2 | 31,086,044  | 31,808,300  | 3 | 0 | 3 | 1 |
| Case 88 | 2 | 31,811,268  | 32,265,125  | 2 | 0 | 2 | 1 |
| Case 88 | 2 | 32,278,782  | 33,144,085  | 1 | 0 | 1 | 0 |
| Case 88 | 2 | 33,148,131  | 38,517,515  | 2 | 0 | 2 | 1 |
| Case 88 | 2 | 38,520,856  | 39,751,029  | 1 | 0 | 1 | 0 |
| Case 88 | 2 | 39,752,158  | 43,806,918  | 2 | 0 | 2 | 1 |
| Case 88 | 2 | 43,808,065  | 44,527,664  | 1 | 0 | 1 | 0 |
| Case 88 | 2 | 44,528,256  | 53,072,134  | 2 | 0 | 2 | 1 |
| Case 88 | 2 | 53,088,117  | 53,820,452  | 2 | 1 | 3 | 0 |
| Case 88 | 2 | 53,821,511  | 54,530,966  | 1 | 1 | 2 | 0 |
| Case 88 | 2 | 54,536,882  | 55,253,823  | 2 | 1 | 3 | 0 |
| Case 88 | 2 | 55,253,869  | 55,470,115  | 1 | 1 | 2 | 0 |
| Case 88 | 2 | 55,470,683  | 55,973,732  | 1 | 0 | 1 | 0 |
| Case 88 | 2 | 55,983,929  | 60,822,323  | 2 | 1 | 3 | 0 |
| Case 88 | 2 | 60,832,662  | 61,223,290  | 1 | 1 | 2 | 0 |
| Case 88 | 2 | 61,223,666  | 62,673,967  | 1 | 0 | 1 | 0 |
| Case 88 | 2 | 62,676,906  | 64,902,908  | 2 | 1 | 3 | 0 |
| Case 88 | 2 | 64,905,729  | 65,759,671  | 1 | 1 | 2 | 0 |
| Case 88 | 2 | 65,762,704  | 69,431,269  | 2 | 1 | 3 | 0 |
| Case 88 | 2 | 69,435,243  | 70,337,081  | 1 | 1 | 2 | 0 |
| Case 88 | 2 | 70,338,344  | 70,604,385  | 1 | 0 | 1 | 0 |
| Case 88 | 2 | 70,606,777  | 84,971,398  | 2 | 1 | 3 | 0 |
| Case 88 | 2 | 84,972,341  | 85,403,546  | 1 | 1 | 2 | 0 |
| Case 88 | 2 | 85,405,262  | 88,530,617  | 2 | 1 | 3 | 0 |
| Case 88 | 2 | 88,531,886  | 88,892,838  | 1 | 1 | 2 | 0 |
| Case 88 | 2 | 88,895,064  | 92,081,640  | 2 | 1 | 3 | 0 |
| Case 88 | 2 | 95,429,424  | 95,774,043  | 2 | 1 | 3 | 0 |
| Case 88 | 2 | 95,774,151  | 107,456,723 | 2 | 0 | 2 | 1 |
| Case 88 | 2 | 107,459,745 | 107,962,440 | 3 | 0 | 3 | 1 |
| Case 88 | 2 | 107,965,955 | 118,672,529 | 2 | 0 | 2 | 1 |
| Case 88 | 2 | 118,673,663 | 122,273,266 | 2 | 1 | 3 | 0 |
| Case 88 | 2 | 122,273,328 | 122,601,302 | 1 | 1 | 2 | 0 |
| Case 88 | 2 | 122,607,245 | 124,488,139 | 2 | 1 | 3 | 0 |
| Case 88 | 2 | 124,488,562 | 125,091,035 | 2 | 0 | 2 | 1 |
| Case 88 | 2 | 125,099,924 | 125,806,843 | 2 | 1 | 3 | 0 |
| Case 88 | 2 | 125,843,421 | 129,773,278 | 2 | 0 | 2 | 1 |
| Case 88 | 2 | 129,773,352 | 130,580,944 | 3 | 0 | 3 | 1 |
| Case 88 | 2 | 130,581,441 | 133,328,608 | 2 | 0 | 2 | 1 |
| Case 88 | 2 | 133,330,895 | 134,507,967 | 3 | 0 | 3 | 1 |
| Case 88 | 2 | 134,509,873 | 134,939,315 | 2 | 0 | 2 | 1 |
| Case 88 | 2 | 134,945,535 | 135,170,556 | 3 | 0 | 3 | 1 |
| Case 88 | 2 | 135,171,675 | 137,491,121 | 2 | 0 | 2 | 1 |
| Case 88 | 2 | 137,492,022 | 138,975,795 | 3 | 0 | 3 | 1 |
| Case 88 | 2 | 138,979,328 | 140,218,360 | 2 | 0 | 2 | 1 |
| Case 88 | 2 | 140,218,663 | 141,267,580 | 3 | 0 | 3 | 1 |
| Case 88 | 2 | 141,269,323 | 142,536,246 | 2 | 0 | 2 | 1 |

|         |   |             |             |   |   |   |   |
|---------|---|-------------|-------------|---|---|---|---|
| Case 88 | 2 | 142,536,819 | 148,758,479 | 3 | 0 | 3 | 1 |
| Case 88 | 2 | 148,778,272 | 150,019,993 | 2 | 0 | 2 | 1 |
| Case 88 | 2 | 150,020,329 | 151,064,165 | 3 | 0 | 3 | 1 |
| Case 88 | 2 | 151,066,885 | 154,908,839 | 2 | 0 | 2 | 1 |
| Case 88 | 2 | 154,910,880 | 155,322,083 | 3 | 0 | 3 | 1 |
| Case 88 | 2 | 155,322,559 | 160,125,205 | 2 | 0 | 2 | 1 |
| Case 88 | 2 | 160,128,306 | 160,761,171 | 1 | 0 | 1 | 0 |
| Case 88 | 2 | 160,761,808 | 168,178,179 | 2 | 0 | 2 | 1 |
| Case 88 | 2 | 168,187,606 | 169,166,305 | 3 | 0 | 3 | 1 |
| Case 88 | 2 | 169,171,670 | 169,779,712 | 2 | 0 | 2 | 1 |
| Case 88 | 2 | 169,779,764 | 170,129,529 | 3 | 0 | 3 | 1 |
| Case 88 | 2 | 170,132,243 | 172,379,936 | 2 | 0 | 2 | 1 |
| Case 88 | 2 | 172,381,046 | 172,841,213 | 1 | 0 | 1 | 0 |
| Case 88 | 2 | 172,851,552 | 179,340,710 | 2 | 0 | 2 | 1 |
| Case 88 | 2 | 179,341,790 | 179,882,262 | 3 | 0 | 3 | 1 |
| Case 88 | 2 | 179,884,886 | 180,487,430 | 2 | 0 | 2 | 1 |
| Case 88 | 2 | 180,488,450 | 182,766,531 | 3 | 0 | 3 | 1 |
| Case 88 | 2 | 182,766,892 | 184,391,990 | 2 | 0 | 2 | 1 |
| Case 88 | 2 | 184,392,834 | 186,845,934 | 3 | 0 | 3 | 1 |
| Case 88 | 2 | 186,849,059 | 189,743,056 | 2 | 0 | 2 | 1 |
| Case 88 | 2 | 189,748,646 | 190,171,008 | 3 | 0 | 3 | 1 |
| Case 88 | 2 | 190,174,516 | 190,532,183 | 2 | 0 | 2 | 1 |
| Case 88 | 2 | 190,532,206 | 190,728,507 | 1 | 0 | 1 | 0 |
| Case 88 | 2 | 190,728,779 | 192,616,165 | 2 | 0 | 2 | 1 |
| Case 88 | 2 | 192,616,373 | 194,655,743 | 3 | 0 | 3 | 1 |
| Case 88 | 2 | 194,715,328 | 198,896,895 | 2 | 0 | 2 | 1 |
| Case 88 | 2 | 198,898,265 | 199,772,591 | 3 | 0 | 3 | 1 |
| Case 88 | 2 | 199,780,624 | 201,648,832 | 2 | 0 | 2 | 1 |
| Case 88 | 2 | 201,649,955 | 202,342,485 | 1 | 0 | 1 | 0 |
| Case 88 | 2 | 202,343,089 | 203,022,536 | 2 | 0 | 2 | 1 |
| Case 88 | 2 | 203,033,509 | 204,292,517 | 0 | 0 | 0 | 0 |
| Case 88 | 2 | 204,299,540 | 209,215,586 | 2 | 0 | 2 | 1 |
| Case 88 | 2 | 209,215,633 | 209,535,670 | 3 | 0 | 3 | 1 |
| Case 88 | 2 | 209,555,119 | 215,669,147 | 2 | 0 | 2 | 1 |
| Case 88 | 2 | 215,672,527 | 216,300,385 | 1 | 0 | 1 | 0 |
| Case 88 | 2 | 216,300,405 | 224,439,486 | 2 | 0 | 2 | 1 |
| Case 88 | 2 | 224,444,137 | 224,993,943 | 1 | 0 | 1 | 0 |
| Case 88 | 2 | 225,006,135 | 228,044,253 | 2 | 0 | 2 | 1 |
| Case 88 | 2 | 228,045,315 | 228,667,258 | 1 | 0 | 1 | 0 |
| Case 88 | 2 | 228,669,735 | 231,555,684 | 2 | 0 | 2 | 1 |
| Case 88 | 2 | 231,556,188 | 231,886,444 | 3 | 0 | 3 | 1 |
| Case 88 | 2 | 231,891,530 | 232,790,908 | 2 | 0 | 2 | 1 |
| Case 88 | 2 | 232,791,948 | 241,286,856 | 3 | 0 | 3 | 1 |
| Case 88 | 2 | 241,288,227 | 241,686,663 | 4 | 0 | 4 | 1 |
| Case 88 | 2 | 241,686,737 | 242,757,460 | 3 | 0 | 3 | 1 |
| Case 88 | 2 | 242,757,466 | 243,048,760 | 4 | 0 | 4 | 1 |
| Case 88 | 3 | 61,495      | 1,547,688   | 2 | 1 | 3 | 0 |
| Case 88 | 3 | 1,548,001   | 3,306,941   | 1 | 1 | 2 | 0 |
| Case 88 | 3 | 3,307,984   | 3,934,139   | 2 | 1 | 3 | 0 |
| Case 88 | 3 | 3,941,431   | 5,544,395   | 1 | 1 | 2 | 0 |
| Case 88 | 3 | 5,548,037   | 6,262,786   | 2 | 1 | 3 | 0 |
| Case 88 | 3 | 6,265,920   | 10,413,526  | 1 | 1 | 2 | 0 |
| Case 88 | 3 | 10,413,601  | 10,995,671  | 2 | 2 | 4 | 0 |
| Case 88 | 3 | 10,996,556  | 12,942,710  | 1 | 1 | 2 | 0 |
| Case 88 | 3 | 12,943,013  | 13,367,357  | 2 | 2 | 4 | 0 |
| Case 88 | 3 | 13,367,406  | 14,656,435  | 2 | 1 | 3 | 0 |
| Case 88 | 3 | 14,657,598  | 18,010,703  | 1 | 1 | 2 | 0 |
| Case 88 | 3 | 18,013,554  | 19,487,934  | 2 | 1 | 3 | 0 |
| Case 88 | 3 | 19,491,636  | 19,975,139  | 1 | 1 | 2 | 0 |
| Case 88 | 3 | 19,975,194  | 20,212,189  | 1 | 0 | 1 | 0 |
| Case 88 | 3 | 20,212,227  | 24,203,529  | 1 | 1 | 2 | 0 |

|         |   |             |             |   |   |   |   |
|---------|---|-------------|-------------|---|---|---|---|
| Case 88 | 3 | 24,208,974  | 25,843,732  | 2 | 0 | 2 | 1 |
| Case 88 | 3 | 25,846,126  | 27,958,681  | 1 | 0 | 1 | 0 |
| Case 88 | 3 | 27,959,742  | 31,901,848  | 1 | 1 | 2 | 0 |
| Case 88 | 3 | 31,908,377  | 34,059,913  | 1 | 0 | 1 | 0 |
| Case 88 | 3 | 34,060,079  | 36,921,795  | 1 | 1 | 2 | 0 |
| Case 88 | 3 | 36,931,397  | 37,414,439  | 1 | 0 | 1 | 0 |
| Case 88 | 3 | 37,453,112  | 38,748,778  | 1 | 1 | 2 | 0 |
| Case 88 | 3 | 38,750,375  | 38,945,454  | 2 | 1 | 3 | 0 |
| Case 88 | 3 | 38,945,560  | 41,714,831  | 1 | 1 | 2 | 0 |
| Case 88 | 3 | 41,716,317  | 42,226,151  | 1 | 0 | 1 | 0 |
| Case 88 | 3 | 42,229,550  | 47,052,937  | 1 | 1 | 2 | 0 |
| Case 88 | 3 | 47,058,057  | 48,309,828  | 1 | 0 | 1 | 0 |
| Case 88 | 3 | 48,309,903  | 49,237,394  | 1 | 1 | 2 | 0 |
| Case 88 | 3 | 49,245,077  | 49,689,390  | 1 | 0 | 1 | 0 |
| Case 88 | 3 | 49,689,449  | 50,798,126  | 2 | 0 | 2 | 1 |
| Case 88 | 3 | 50,816,121  | 51,664,847  | 1 | 0 | 1 | 0 |
| Case 88 | 3 | 51,667,967  | 52,584,787  | 2 | 0 | 2 | 1 |
| Case 88 | 3 | 52,588,655  | 52,773,455  | 1 | 0 | 1 | 0 |
| Case 88 | 3 | 52,773,561  | 52,896,855  | 2 | 0 | 2 | 1 |
| Case 88 | 3 | 52,904,550  | 53,668,672  | 1 | 0 | 1 | 0 |
| Case 88 | 3 | 53,668,708  | 53,893,840  | 2 | 0 | 2 | 1 |
| Case 88 | 3 | 53,894,412  | 54,946,578  | 1 | 0 | 1 | 0 |
| Case 88 | 3 | 54,946,982  | 56,025,951  | 2 | 0 | 2 | 1 |
| Case 88 | 3 | 56,026,218  | 58,072,471  | 1 | 0 | 1 | 0 |
| Case 88 | 3 | 58,080,567  | 60,439,043  | 1 | 1 | 2 | 0 |
| Case 88 | 3 | 60,441,079  | 60,585,933  | 1 | 0 | 1 | 0 |
| Case 88 | 3 | 60,587,580  | 65,185,849  | 1 | 1 | 2 | 0 |
| Case 88 | 3 | 65,191,847  | 65,214,533  | 0 | 0 | 0 | 0 |
| Case 88 | 3 | 65,215,804  | 69,231,791  | 1 | 1 | 2 | 0 |
| Case 88 | 3 | 69,236,991  | 69,347,922  | 1 | 0 | 1 | 0 |
| Case 88 | 3 | 69,350,874  | 72,700,181  | 1 | 1 | 2 | 0 |
| Case 88 | 3 | 72,701,660  | 73,151,050  | 1 | 0 | 1 | 0 |
| Case 88 | 3 | 73,152,124  | 90,442,925  | 1 | 1 | 2 | 0 |
| Case 88 | 3 | 93,537,290  | 93,611,911  | 1 | 1 | 2 | 0 |
| Case 88 | 3 | 93,612,369  | 98,002,417  | 2 | 1 | 3 | 0 |
| Case 88 | 3 | 98,002,419  | 98,966,922  | 2 | 0 | 2 | 1 |
| Case 88 | 3 | 98,967,139  | 99,822,536  | 2 | 1 | 3 | 0 |
| Case 88 | 3 | 99,835,254  | 100,413,645 | 2 | 0 | 2 | 1 |
| Case 88 | 3 | 100,413,717 | 101,232,736 | 2 | 1 | 3 | 0 |
| Case 88 | 3 | 101,237,890 | 101,507,015 | 1 | 0 | 1 | 0 |
| Case 88 | 3 | 101,510,634 | 102,064,584 | 2 | 0 | 2 | 1 |
| Case 88 | 3 | 102,067,254 | 103,750,905 | 3 | 0 | 3 | 1 |
| Case 88 | 3 | 103,752,461 | 110,965,554 | 2 | 0 | 2 | 1 |
| Case 88 | 3 | 110,967,648 | 111,313,457 | 3 | 0 | 3 | 1 |
| Case 88 | 3 | 111,313,854 | 112,872,989 | 2 | 0 | 2 | 1 |
| Case 88 | 3 | 112,875,949 | 113,022,889 | 3 | 0 | 3 | 1 |
| Case 88 | 3 | 113,022,996 | 117,427,801 | 2 | 0 | 2 | 1 |
| Case 88 | 3 | 117,429,566 | 118,867,047 | 3 | 0 | 3 | 1 |
| Case 88 | 3 | 118,867,055 | 123,211,064 | 2 | 0 | 2 | 1 |
| Case 88 | 3 | 123,212,563 | 124,210,544 | 3 | 0 | 3 | 1 |
| Case 88 | 3 | 124,211,050 | 125,748,213 | 2 | 0 | 2 | 1 |
| Case 88 | 3 | 125,758,232 | 128,212,526 | 3 | 0 | 3 | 1 |
| Case 88 | 3 | 128,218,410 | 129,944,129 | 2 | 0 | 2 | 1 |
| Case 88 | 3 | 129,946,531 | 130,368,301 | 3 | 0 | 3 | 1 |
| Case 88 | 3 | 130,368,317 | 134,160,593 | 2 | 0 | 2 | 1 |
| Case 88 | 3 | 134,166,224 | 135,475,556 | 3 | 0 | 3 | 1 |
| Case 88 | 3 | 135,475,923 | 139,452,207 | 2 | 0 | 2 | 1 |
| Case 88 | 3 | 139,454,159 | 140,419,730 | 3 | 0 | 3 | 1 |
| Case 88 | 3 | 140,419,734 | 141,275,436 | 2 | 0 | 2 | 1 |
| Case 88 | 3 | 141,278,737 | 142,979,264 | 1 | 0 | 1 | 0 |
| Case 88 | 3 | 142,980,880 | 143,499,364 | 2 | 0 | 2 | 1 |

|         |   |             |             |   |   |   |   |
|---------|---|-------------|-------------|---|---|---|---|
| Case 88 | 3 | 143,500,636 | 145,409,452 | 1 | 0 | 1 | 0 |
| Case 88 | 3 | 145,409,857 | 149,252,801 | 1 | 1 | 2 | 0 |
| Case 88 | 3 | 149,254,700 | 149,660,475 | 1 | 0 | 1 | 0 |
| Case 88 | 3 | 149,668,016 | 152,611,324 | 1 | 1 | 2 | 0 |
| Case 88 | 3 | 152,611,465 | 153,280,557 | 1 | 0 | 1 | 0 |
| Case 88 | 3 | 153,284,777 | 155,241,691 | 1 | 1 | 2 | 0 |
| Case 88 | 3 | 155,241,740 | 155,738,576 | 1 | 0 | 1 | 0 |
| Case 88 | 3 | 155,743,407 | 161,017,192 | 1 | 1 | 2 | 0 |
| Case 88 | 3 | 161,036,373 | 162,698,133 | 2 | 1 | 3 | 0 |
| Case 88 | 3 | 162,701,721 | 163,902,187 | 1 | 1 | 2 | 0 |
| Case 88 | 3 | 163,904,370 | 165,136,797 | 2 | 1 | 3 | 0 |
| Case 88 | 3 | 165,160,646 | 169,477,506 | 3 | 1 | 4 | 0 |
| Case 88 | 3 | 169,480,204 | 170,162,684 | 2 | 0 | 2 | 1 |
| Case 88 | 3 | 170,163,474 | 170,900,917 | 2 | 1 | 3 | 0 |
| Case 88 | 3 | 170,908,762 | 171,081,370 | 3 | 1 | 4 | 0 |
| Case 88 | 3 | 171,083,708 | 172,835,393 | 2 | 1 | 3 | 0 |
| Case 88 | 3 | 172,835,418 | 176,792,166 | 3 | 1 | 4 | 0 |
| Case 88 | 3 | 176,799,074 | 177,282,809 | 2 | 0 | 2 | 1 |
| Case 88 | 3 | 177,286,946 | 177,552,252 | 2 | 1 | 3 | 0 |
| Case 88 | 3 | 177,552,702 | 178,585,678 | 3 | 1 | 4 | 0 |
| Case 88 | 3 | 178,588,348 | 179,472,674 | 2 | 0 | 2 | 1 |
| Case 88 | 3 | 179,474,867 | 182,315,570 | 2 | 1 | 3 | 0 |
| Case 88 | 3 | 182,316,034 | 183,818,264 | 2 | 0 | 2 | 1 |
| Case 88 | 3 | 183,818,336 | 184,980,371 | 2 | 1 | 3 | 0 |
| Case 88 | 3 | 184,998,296 | 185,613,272 | 2 | 0 | 2 | 1 |
| Case 88 | 3 | 185,616,564 | 188,114,589 | 2 | 1 | 3 | 0 |
| Case 88 | 3 | 188,120,643 | 192,133,703 | 3 | 1 | 4 | 0 |
| Case 88 | 3 | 192,135,606 | 192,973,579 | 2 | 1 | 3 | 0 |
| Case 88 | 3 | 192,979,624 | 193,944,478 | 3 | 1 | 4 | 0 |
| Case 88 | 3 | 193,946,147 | 195,557,461 | 2 | 1 | 3 | 0 |
| Case 88 | 3 | 195,559,289 | 197,838,262 | 2 | 0 | 2 | 1 |
| Case 88 | 4 | 71,566      | 181,476     | 2 | 0 | 2 | 1 |
| Case 88 | 4 | 181,832     | 497,138     | 0 | 0 | 0 | 0 |
| Case 88 | 4 | 498,459     | 1,113,257   | 2 | 0 | 2 | 1 |
| Case 88 | 4 | 1,121,508   | 2,160,884   | 1 | 1 | 2 | 0 |
| Case 88 | 4 | 2,160,894   | 2,910,308   | 1 | 0 | 1 | 0 |
| Case 88 | 4 | 2,916,931   | 3,432,508   | 2 | 0 | 2 | 1 |
| Case 88 | 4 | 3,432,638   | 3,942,867   | 2 | 1 | 3 | 0 |
| Case 88 | 4 | 3,980,138   | 4,276,132   | 1 | 0 | 1 | 0 |
| Case 88 | 4 | 4,276,198   | 6,024,426   | 2 | 0 | 2 | 1 |
| Case 88 | 4 | 6,026,058   | 6,517,005   | 2 | 1 | 3 | 0 |
| Case 88 | 4 | 6,517,066   | 7,204,493   | 2 | 0 | 2 | 1 |
| Case 88 | 4 | 7,206,401   | 8,397,686   | 2 | 1 | 3 | 0 |
| Case 88 | 4 | 8,398,798   | 10,574,056  | 2 | 0 | 2 | 1 |
| Case 88 | 4 | 10,575,214  | 13,067,251  | 1 | 0 | 1 | 0 |
| Case 88 | 4 | 13,068,686  | 15,200,699  | 2 | 0 | 2 | 1 |
| Case 88 | 4 | 15,204,833  | 23,792,768  | 1 | 0 | 1 | 0 |
| Case 88 | 4 | 23,794,252  | 24,256,496  | 2 | 0 | 2 | 1 |
| Case 88 | 4 | 24,259,055  | 24,804,722  | 1 | 0 | 1 | 0 |
| Case 88 | 4 | 24,807,287  | 25,067,377  | 2 | 0 | 2 | 1 |
| Case 88 | 4 | 25,067,465  | 39,406,987  | 1 | 0 | 1 | 0 |
| Case 88 | 4 | 39,408,595  | 40,198,842  | 0 | 0 | 0 | 0 |
| Case 88 | 4 | 40,199,551  | 40,199,551  | 1 | 0 | 1 | 0 |
| Case 88 | 4 | 40,205,742  | 40,215,687  | 2 | 0 | 2 | 1 |
| Case 88 | 4 | 40,217,706  | 49,620,898  | 1 | 0 | 1 | 0 |
| Case 88 | 4 | 52,697,856  | 79,291,130  | 1 | 0 | 1 | 0 |
| Case 88 | 4 | 79,291,535  | 80,996,125  | 2 | 0 | 2 | 1 |
| Case 88 | 4 | 81,001,542  | 90,149,589  | 1 | 0 | 1 | 0 |
| Case 88 | 4 | 90,150,552  | 91,069,888  | 2 | 0 | 2 | 1 |
| Case 88 | 4 | 91,123,665  | 98,098,473  | 1 | 0 | 1 | 0 |
| Case 88 | 4 | 98,100,051  | 98,444,547  | 2 | 0 | 2 | 1 |

|         |   |             |             |   |   |   |   |
|---------|---|-------------|-------------|---|---|---|---|
| Case 88 | 4 | 98,457,301  | 114,477,154 | 1 | 0 | 1 | 0 |
| Case 88 | 4 | 114,478,653 | 114,816,990 | 2 | 0 | 2 | 1 |
| Case 88 | 4 | 114,821,256 | 125,013,856 | 1 | 0 | 1 | 0 |
| Case 88 | 4 | 125,017,034 | 126,273,052 | 2 | 0 | 2 | 1 |
| Case 88 | 4 | 126,275,373 | 129,867,280 | 1 | 0 | 1 | 0 |
| Case 88 | 4 | 129,867,300 | 130,591,851 | 2 | 0 | 2 | 1 |
| Case 88 | 4 | 130,592,857 | 133,961,722 | 1 | 0 | 1 | 0 |
| Case 88 | 4 | 133,981,517 | 136,421,815 | 2 | 0 | 2 | 1 |
| Case 88 | 4 | 136,422,205 | 138,080,761 | 3 | 0 | 3 | 1 |
| Case 88 | 4 | 138,087,831 | 146,961,679 | 2 | 0 | 2 | 1 |
| Case 88 | 4 | 146,968,904 | 148,308,126 | 3 | 0 | 3 | 1 |
| Case 88 | 4 | 148,309,369 | 149,356,352 | 2 | 0 | 2 | 1 |
| Case 88 | 4 | 149,356,682 | 151,840,850 | 2 | 1 | 3 | 0 |
| Case 88 | 4 | 151,842,358 | 152,175,168 | 1 | 0 | 1 | 0 |
| Case 88 | 4 | 152,179,311 | 156,281,490 | 2 | 1 | 3 | 0 |
| Case 88 | 4 | 156,283,212 | 156,557,255 | 1 | 1 | 2 | 0 |
| Case 88 | 4 | 156,558,695 | 181,637,915 | 1 | 0 | 1 | 0 |
| Case 88 | 4 | 181,637,973 | 181,730,895 | 2 | 0 | 2 | 1 |
| Case 88 | 4 | 181,734,569 | 181,885,905 | 0 | 0 | 0 | 0 |
| Case 88 | 4 | 181,888,903 | 181,915,930 | 2 | 0 | 2 | 1 |
| Case 88 | 4 | 181,919,047 | 190,963,766 | 1 | 0 | 1 | 0 |
| Case 88 | 5 | 38,139      | 269,234     | 2 | 1 | 3 | 0 |
| Case 88 | 5 | 303,686     | 676,806     | 1 | 1 | 2 | 0 |
| Case 88 | 5 | 677,718     | 988,510     | 2 | 2 | 4 | 0 |
| Case 88 | 5 | 992,509     | 16,547,911  | 1 | 1 | 2 | 0 |
| Case 88 | 5 | 16,556,601  | 18,000,871  | 1 | 0 | 1 | 0 |
| Case 88 | 5 | 18,007,227  | 28,256,995  | 1 | 1 | 2 | 0 |
| Case 88 | 5 | 28,260,714  | 29,521,275  | 1 | 0 | 1 | 0 |
| Case 88 | 5 | 29,526,304  | 31,690,559  | 1 | 1 | 2 | 0 |
| Case 88 | 5 | 31,692,876  | 32,585,709  | 1 | 0 | 1 | 0 |
| Case 88 | 5 | 32,586,844  | 37,111,565  | 1 | 1 | 2 | 0 |
| Case 88 | 5 | 37,115,116  | 37,501,596  | 1 | 0 | 1 | 0 |
| Case 88 | 5 | 37,505,646  | 45,874,923  | 1 | 1 | 2 | 0 |
| Case 88 | 5 | 45,905,997  | 46,399,093  | 0 | 0 | 0 | 0 |
| Case 88 | 5 | 49,457,282  | 49,669,981  | 0 | 0 | 0 | 0 |
| Case 88 | 5 | 49,694,961  | 53,861,604  | 1 | 1 | 2 | 0 |
| Case 88 | 5 | 53,867,201  | 54,232,372  | 1 | 0 | 1 | 0 |
| Case 88 | 5 | 54,232,607  | 55,220,819  | 1 | 1 | 2 | 0 |
| Case 88 | 5 | 55,220,879  | 55,509,554  | 1 | 0 | 1 | 0 |
| Case 88 | 5 | 55,509,576  | 64,766,798  | 1 | 1 | 2 | 0 |
| Case 88 | 5 | 64,772,879  | 65,093,845  | 1 | 0 | 1 | 0 |
| Case 88 | 5 | 65,099,626  | 68,322,358  | 1 | 1 | 2 | 0 |
| Case 88 | 5 | 68,322,642  | 70,927,856  | 1 | 0 | 1 | 0 |
| Case 88 | 5 | 70,931,069  | 78,153,325  | 1 | 1 | 2 | 0 |
| Case 88 | 5 | 78,179,604  | 78,944,996  | 1 | 0 | 1 | 0 |
| Case 88 | 5 | 78,945,171  | 79,530,306  | 1 | 1 | 2 | 0 |
| Case 88 | 5 | 79,532,244  | 80,083,386  | 1 | 0 | 1 | 0 |
| Case 88 | 5 | 80,083,428  | 90,306,939  | 1 | 1 | 2 | 0 |
| Case 88 | 5 | 90,316,643  | 102,781,533 | 1 | 0 | 1 | 0 |
| Case 88 | 5 | 102,793,568 | 103,071,415 | 2 | 0 | 2 | 1 |
| Case 88 | 5 | 103,074,969 | 106,263,197 | 0 | 0 | 0 | 0 |
| Case 88 | 5 | 106,265,598 | 106,469,895 | 1 | 1 | 2 | 0 |
| Case 88 | 5 | 106,473,749 | 108,550,889 | 1 | 0 | 1 | 0 |
| Case 88 | 5 | 108,554,780 | 109,058,683 | 5 | 0 | 5 | 1 |
| Case 88 | 5 | 109,065,098 | 109,155,967 | 1 | 1 | 2 | 0 |
| Case 88 | 5 | 109,159,494 | 110,412,894 | 1 | 0 | 1 | 0 |
| Case 88 | 5 | 110,417,428 | 110,677,604 | 2 | 0 | 2 | 1 |
| Case 88 | 5 | 110,682,544 | 114,576,598 | 1 | 0 | 1 | 0 |
| Case 88 | 5 | 114,577,253 | 115,831,873 | 2 | 0 | 2 | 1 |
| Case 88 | 5 | 115,832,056 | 122,343,870 | 1 | 0 | 1 | 0 |
| Case 88 | 5 | 122,348,548 | 123,782,602 | 2 | 0 | 2 | 1 |

|         |   |             |             |   |   |   |   |
|---------|---|-------------|-------------|---|---|---|---|
| Case 88 | 5 | 123,784,283 | 127,622,491 | 1 | 0 | 1 | 0 |
| Case 88 | 5 | 127,622,747 | 128,552,706 | 2 | 0 | 2 | 1 |
| Case 88 | 5 | 128,553,667 | 132,533,517 | 1 | 0 | 1 | 0 |
| Case 88 | 5 | 132,534,021 | 133,224,274 | 2 | 0 | 2 | 1 |
| Case 88 | 5 | 133,224,404 | 134,295,167 | 1 | 0 | 1 | 0 |
| Case 88 | 5 | 134,303,694 | 136,733,948 | 2 | 0 | 2 | 1 |
| Case 88 | 5 | 136,734,285 | 139,745,154 | 1 | 0 | 1 | 0 |
| Case 88 | 5 | 139,745,467 | 139,745,739 | 2 | 0 | 2 | 1 |
| Case 88 | 5 | 139,745,800 | 140,023,818 | 0 | 0 | 0 | 0 |
| Case 88 | 5 | 140,024,214 | 140,024,269 | 1 | 0 | 1 | 0 |
| Case 88 | 5 | 140,025,192 | 140,213,972 | 2 | 0 | 2 | 1 |
| Case 88 | 5 | 140,214,045 | 140,229,435 | 0 | 0 | 0 | 0 |
| Case 88 | 5 | 140,229,786 | 140,229,786 | 1 | 0 | 1 | 0 |
| Case 88 | 5 | 140,229,942 | 141,337,126 | 2 | 0 | 2 | 1 |
| Case 88 | 5 | 141,337,145 | 142,767,740 | 1 | 0 | 1 | 0 |
| Case 88 | 5 | 142,767,778 | 143,225,966 | 2 | 0 | 2 | 1 |
| Case 88 | 5 | 143,226,759 | 147,421,488 | 1 | 0 | 1 | 0 |
| Case 88 | 5 | 147,424,788 | 148,756,848 | 2 | 0 | 2 | 1 |
| Case 88 | 5 | 148,758,027 | 149,200,066 | 1 | 0 | 1 | 0 |
| Case 88 | 5 | 149,200,402 | 150,459,788 | 2 | 0 | 2 | 1 |
| Case 88 | 5 | 150,461,049 | 150,695,700 | 1 | 0 | 1 | 0 |
| Case 88 | 5 | 150,695,724 | 150,981,259 | 2 | 0 | 2 | 1 |
| Case 88 | 5 | 150,981,304 | 151,377,281 | 1 | 0 | 1 | 0 |
| Case 88 | 5 | 151,377,631 | 151,985,487 | 2 | 0 | 2 | 1 |
| Case 88 | 5 | 151,998,609 | 152,883,381 | 1 | 0 | 1 | 0 |
| Case 88 | 5 | 152,887,567 | 153,802,650 | 1 | 1 | 2 | 0 |
| Case 88 | 5 | 153,803,086 | 157,564,869 | 1 | 0 | 1 | 0 |
| Case 88 | 5 | 157,565,338 | 158,489,315 | 2 | 0 | 2 | 1 |
| Case 88 | 5 | 158,490,202 | 159,928,372 | 1 | 0 | 1 | 0 |
| Case 88 | 5 | 159,934,161 | 160,134,369 | 1 | 1 | 2 | 0 |
| Case 88 | 5 | 160,135,873 | 163,221,209 | 1 | 0 | 1 | 0 |
| Case 88 | 5 | 163,222,890 | 169,348,810 | 1 | 1 | 2 | 0 |
| Case 88 | 5 | 169,349,995 | 169,578,246 | 2 | 2 | 4 | 0 |
| Case 88 | 5 | 169,580,540 | 171,482,726 | 1 | 1 | 2 | 0 |
| Case 88 | 5 | 171,483,578 | 171,762,100 | 1 | 0 | 1 | 0 |
| Case 88 | 5 | 171,762,575 | 180,693,127 | 1 | 1 | 2 | 0 |
| Case 88 | 6 | 108,666     | 380,341     | 2 | 1 | 3 | 0 |
| Case 88 | 6 | 382,897     | 1,055,655   | 1 | 0 | 1 | 0 |
| Case 88 | 6 | 1,056,155   | 1,777,764   | 2 | 0 | 2 | 1 |
| Case 88 | 6 | 1,780,691   | 6,093,449   | 1 | 0 | 1 | 0 |
| Case 88 | 6 | 6,094,026   | 6,435,068   | 2 | 0 | 2 | 1 |
| Case 88 | 6 | 6,445,863   | 9,544,144   | 1 | 0 | 1 | 0 |
| Case 88 | 6 | 9,545,130   | 10,295,815  | 1 | 1 | 2 | 0 |
| Case 88 | 6 | 10,295,896  | 10,982,652  | 1 | 0 | 1 | 0 |
| Case 88 | 6 | 10,982,848  | 14,887,071  | 1 | 1 | 2 | 0 |
| Case 88 | 6 | 14,887,524  | 15,365,977  | 1 | 0 | 1 | 0 |
| Case 88 | 6 | 15,369,898  | 17,108,786  | 1 | 1 | 2 | 0 |
| Case 88 | 6 | 17,115,281  | 18,406,854  | 1 | 0 | 1 | 0 |
| Case 88 | 6 | 18,407,590  | 21,393,645  | 1 | 1 | 2 | 0 |
| Case 88 | 6 | 21,397,637  | 22,045,016  | 1 | 0 | 1 | 0 |
| Case 88 | 6 | 22,045,644  | 24,289,124  | 1 | 1 | 2 | 0 |
| Case 88 | 6 | 24,291,203  | 25,014,120  | 1 | 0 | 1 | 0 |
| Case 88 | 6 | 25,015,681  | 27,879,877  | 1 | 1 | 2 | 0 |
| Case 88 | 6 | 27,879,932  | 28,331,128  | 2 | 1 | 3 | 0 |
| Case 88 | 6 | 28,331,252  | 29,138,777  | 1 | 1 | 2 | 0 |
| Case 88 | 6 | 29,141,422  | 30,391,723  | 2 | 1 | 3 | 0 |
| Case 88 | 6 | 30,392,146  | 30,880,757  | 1 | 1 | 2 | 0 |
| Case 88 | 6 | 30,881,122  | 30,955,681  | 2 | 1 | 3 | 0 |
| Case 88 | 6 | 30,955,929  | 31,077,405  | 1 | 1 | 2 | 0 |
| Case 88 | 6 | 31,077,938  | 31,145,164  | 2 | 1 | 3 | 0 |
| Case 88 | 6 | 31,145,271  | 31,218,889  | 2 | 0 | 2 | 1 |



|         |   |             |             |   |   |   |   |
|---------|---|-------------|-------------|---|---|---|---|
| Case 88 | 6 | 31,218,984  | 31,221,914  | 0 | 0 | 0 | 0 |
| Case 88 | 6 | 31,230,701  | 31,232,111  | 2 | 0 | 2 | 1 |
| Case 88 | 6 | 31,232,543  | 32,195,017  | 2 | 1 | 3 | 0 |
| Case 88 | 6 | 32,195,332  | 32,266,490  | 1 | 1 | 2 | 0 |
| Case 88 | 6 | 32,266,535  | 34,125,281  | 2 | 1 | 3 | 0 |
| Case 88 | 6 | 34,131,376  | 38,750,888  | 1 | 1 | 2 | 0 |
| Case 88 | 6 | 38,754,502  | 41,740,541  | 2 | 1 | 3 | 0 |
| Case 88 | 6 | 41,740,575  | 43,322,745  | 1 | 1 | 2 | 0 |
| Case 88 | 6 | 43,323,174  | 52,625,794  | 2 | 1 | 3 | 0 |
| Case 88 | 6 | 52,626,269  | 53,362,890  | 1 | 1 | 2 | 0 |
| Case 88 | 6 | 53,363,725  | 58,654,742  | 2 | 1 | 3 | 0 |
| Case 88 | 6 | 58,664,370  | 58,752,089  | 1 | 0 | 1 | 0 |
| Case 88 | 6 | 61,891,118  | 62,223,257  | 1 | 0 | 1 | 0 |
| Case 88 | 6 | 62,235,802  | 62,702,157  | 2 | 1 | 3 | 0 |
| Case 88 | 6 | 62,702,178  | 63,615,339  | 3 | 1 | 4 | 0 |
| Case 88 | 6 | 63,617,477  | 64,758,787  | 2 | 0 | 2 | 1 |
| Case 88 | 6 | 64,762,195  | 67,964,764  | 2 | 1 | 3 | 0 |
| Case 88 | 6 | 67,965,720  | 69,285,887  | 2 | 0 | 2 | 1 |
| Case 88 | 6 | 69,287,242  | 71,013,640  | 1 | 1 | 2 | 0 |
| Case 88 | 6 | 71,013,722  | 71,609,384  | 1 | 0 | 1 | 0 |
| Case 88 | 6 | 71,609,707  | 73,650,662  | 1 | 1 | 2 | 0 |
| Case 88 | 6 | 73,652,005  | 74,497,126  | 1 | 0 | 1 | 0 |
| Case 88 | 6 | 74,497,152  | 76,174,857  | 1 | 1 | 2 | 0 |
| Case 88 | 6 | 76,186,658  | 77,000,409  | 1 | 0 | 1 | 0 |
| Case 88 | 6 | 77,000,660  | 82,778,549  | 1 | 1 | 2 | 0 |
| Case 88 | 6 | 82,780,595  | 82,943,878  | 1 | 0 | 1 | 0 |
| Case 88 | 6 | 82,950,189  | 87,353,474  | 1 | 1 | 2 | 0 |
| Case 88 | 6 | 87,358,929  | 88,801,635  | 1 | 0 | 1 | 0 |
| Case 88 | 6 | 88,803,599  | 89,432,362  | 1 | 1 | 2 | 0 |
| Case 88 | 6 | 89,460,542  | 90,622,723  | 1 | 0 | 1 | 0 |
| Case 88 | 6 | 90,625,166  | 99,646,240  | 1 | 1 | 2 | 0 |
| Case 88 | 6 | 99,659,802  | 100,046,845 | 1 | 0 | 1 | 0 |
| Case 88 | 6 | 100,046,933 | 104,740,041 | 1 | 1 | 2 | 0 |
| Case 88 | 6 | 104,740,181 | 105,761,860 | 1 | 0 | 1 | 0 |
| Case 88 | 6 | 105,768,250 | 106,968,943 | 1 | 1 | 2 | 0 |
| Case 88 | 6 | 106,969,027 | 107,791,661 | 1 | 0 | 1 | 0 |
| Case 88 | 6 | 107,793,039 | 108,086,370 | 1 | 1 | 2 | 0 |
| Case 88 | 6 | 108,088,477 | 109,548,713 | 1 | 0 | 1 | 0 |
| Case 88 | 6 | 109,557,542 | 110,942,500 | 1 | 1 | 2 | 0 |
| Case 88 | 6 | 110,950,048 | 111,587,081 | 0 | 0 | 0 | 0 |
| Case 88 | 6 | 111,587,204 | 113,936,188 | 1 | 1 | 2 | 0 |
| Case 88 | 6 | 113,940,473 | 114,196,489 | 1 | 0 | 1 | 0 |
| Case 88 | 6 | 114,200,450 | 119,044,453 | 1 | 1 | 2 | 0 |
| Case 88 | 6 | 119,046,017 | 119,356,201 | 1 | 0 | 1 | 0 |
| Case 88 | 6 | 119,359,254 | 121,638,732 | 1 | 1 | 2 | 0 |
| Case 88 | 6 | 121,642,851 | 122,107,994 | 1 | 0 | 1 | 0 |
| Case 88 | 6 | 122,120,089 | 131,282,210 | 1 | 1 | 2 | 0 |
| Case 88 | 6 | 131,284,381 | 131,905,032 | 1 | 0 | 1 | 0 |
| Case 88 | 6 | 131,905,717 | 134,230,714 | 1 | 1 | 2 | 0 |
| Case 88 | 6 | 134,232,194 | 137,108,757 | 1 | 0 | 1 | 0 |
| Case 88 | 6 | 137,112,958 | 138,304,615 | 1 | 1 | 2 | 0 |
| Case 88 | 6 | 138,315,199 | 140,073,614 | 1 | 0 | 1 | 0 |
| Case 88 | 6 | 140,075,039 | 143,828,518 | 1 | 1 | 2 | 0 |
| Case 88 | 6 | 143,830,178 | 144,747,242 | 1 | 0 | 1 | 0 |
| Case 88 | 6 | 144,747,451 | 148,044,515 | 1 | 1 | 2 | 0 |
| Case 88 | 6 | 148,045,181 | 148,839,982 | 1 | 0 | 1 | 0 |
| Case 88 | 6 | 148,840,713 | 149,699,523 | 1 | 1 | 2 | 0 |
| Case 88 | 6 | 149,699,925 | 150,211,189 | 1 | 0 | 1 | 0 |
| Case 88 | 6 | 150,211,242 | 151,161,872 | 1 | 1 | 2 | 0 |
| Case 88 | 6 | 151,162,004 | 152,132,214 | 1 | 0 | 1 | 0 |
| Case 88 | 6 | 152,135,451 | 152,484,288 | 1 | 1 | 2 | 0 |

|         |   |             |             |   |   |   |   |
|---------|---|-------------|-------------|---|---|---|---|
| Case 88 | 6 | 152,484,763 | 152,642,914 | 1 | 0 | 1 | 0 |
| Case 88 | 6 | 152,643,365 | 153,902,816 | 1 | 1 | 2 | 0 |
| Case 88 | 6 | 153,915,549 | 155,597,005 | 1 | 0 | 1 | 0 |
| Case 88 | 6 | 155,597,092 | 158,502,528 | 1 | 1 | 2 | 0 |
| Case 88 | 6 | 158,504,365 | 159,403,554 | 1 | 0 | 1 | 0 |
| Case 88 | 6 | 159,403,577 | 167,767,774 | 1 | 1 | 2 | 0 |
| Case 88 | 6 | 167,767,813 | 168,526,858 | 2 | 1 | 3 | 0 |
| Case 88 | 6 | 168,531,451 | 170,980,171 | 1 | 1 | 2 | 0 |
| Case 88 | 7 | 44,935      | 561,070     | 4 | 0 | 4 | 1 |
| Case 88 | 7 | 591,027     | 4,501,085   | 3 | 0 | 3 | 1 |
| Case 88 | 7 | 4,501,781   | 6,929,662   | 2 | 0 | 2 | 1 |
| Case 88 | 7 | 6,937,338   | 10,007,255  | 4 | 0 | 4 | 1 |
| Case 88 | 7 | 10,042,560  | 11,532,297  | 3 | 0 | 3 | 1 |
| Case 88 | 7 | 11,534,319  | 12,385,391  | 4 | 0 | 4 | 1 |
| Case 88 | 7 | 12,391,319  | 13,333,678  | 3 | 0 | 3 | 1 |
| Case 88 | 7 | 13,333,829  | 13,522,169  | 4 | 0 | 4 | 1 |
| Case 88 | 7 | 13,527,659  | 14,234,531  | 3 | 0 | 3 | 1 |
| Case 88 | 7 | 14,235,801  | 15,437,962  | 4 | 0 | 4 | 1 |
| Case 88 | 7 | 15,440,108  | 16,900,123  | 3 | 0 | 3 | 1 |
| Case 88 | 7 | 16,900,195  | 17,912,336  | 4 | 0 | 4 | 1 |
| Case 88 | 7 | 17,913,195  | 18,215,216  | 3 | 0 | 3 | 1 |
| Case 88 | 7 | 18,216,046  | 19,413,024  | 5 | 0 | 5 | 1 |
| Case 88 | 7 | 19,413,271  | 19,418,564  | 3 | 0 | 3 | 1 |
| Case 88 | 7 | 19,421,606  | 20,686,143  | 4 | 0 | 4 | 1 |
| Case 88 | 7 | 20,686,910  | 20,902,799  | 3 | 0 | 3 | 1 |
| Case 88 | 7 | 20,903,218  | 23,228,400  | 4 | 0 | 4 | 1 |
| Case 88 | 7 | 23,230,554  | 24,081,463  | 3 | 0 | 3 | 1 |
| Case 88 | 7 | 24,082,848  | 25,801,760  | 4 | 0 | 4 | 1 |
| Case 88 | 7 | 25,802,471  | 31,736,599  | 3 | 0 | 3 | 1 |
| Case 88 | 7 | 31,739,631  | 31,986,723  | 4 | 0 | 4 | 1 |
| Case 88 | 7 | 32,001,658  | 34,350,994  | 3 | 0 | 3 | 1 |
| Case 88 | 7 | 34,354,465  | 34,561,147  | 4 | 0 | 4 | 1 |
| Case 88 | 7 | 34,583,827  | 39,612,012  | 3 | 0 | 3 | 1 |
| Case 88 | 7 | 39,612,084  | 40,158,527  | 2 | 0 | 2 | 1 |
| Case 88 | 7 | 40,162,586  | 46,582,554  | 3 | 0 | 3 | 1 |
| Case 88 | 7 | 46,591,607  | 47,167,965  | 4 | 0 | 4 | 1 |
| Case 88 | 7 | 47,185,886  | 48,354,820  | 3 | 0 | 3 | 1 |
| Case 88 | 7 | 48,356,757  | 49,739,731  | 4 | 0 | 4 | 1 |
| Case 88 | 7 | 49,741,924  | 55,856,799  | 3 | 0 | 3 | 1 |
| Case 88 | 7 | 55,862,844  | 56,727,631  | 2 | 0 | 2 | 1 |
| Case 88 | 7 | 56,755,583  | 57,882,950  | 3 | 0 | 3 | 1 |
| Case 88 | 7 | 58,007,774  | 58,019,061  | 2 | 0 | 2 | 1 |
| Case 88 | 7 | 61,056,053  | 61,852,895  | 2 | 0 | 2 | 1 |
| Case 88 | 7 | 61,994,170  | 63,385,883  | 0 | 0 | 0 | 0 |
| Case 88 | 7 | 63,387,484  | 64,141,291  | 2 | 0 | 2 | 1 |
| Case 88 | 7 | 64,150,010  | 64,452,081  | 1 | 0 | 1 | 0 |
| Case 88 | 7 | 64,452,104  | 67,620,455  | 2 | 0 | 2 | 1 |
| Case 88 | 7 | 67,623,433  | 68,549,929  | 1 | 0 | 1 | 0 |
| Case 88 | 7 | 68,553,958  | 82,370,821  | 2 | 0 | 2 | 1 |
| Case 88 | 7 | 82,371,376  | 82,784,591  | 3 | 0 | 3 | 1 |
| Case 88 | 7 | 82,784,660  | 83,986,207  | 2 | 0 | 2 | 1 |
| Case 88 | 7 | 83,993,099  | 86,823,333  | 3 | 0 | 3 | 1 |
| Case 88 | 7 | 86,823,401  | 88,166,231  | 2 | 0 | 2 | 1 |
| Case 88 | 7 | 88,173,578  | 88,722,433  | 3 | 0 | 3 | 1 |
| Case 88 | 7 | 88,723,903  | 89,202,570  | 2 | 0 | 2 | 1 |
| Case 88 | 7 | 89,202,784  | 89,861,890  | 3 | 0 | 3 | 1 |
| Case 88 | 7 | 89,861,957  | 90,523,546  | 2 | 0 | 2 | 1 |
| Case 88 | 7 | 90,530,072  | 91,010,280  | 3 | 0 | 3 | 1 |
| Case 88 | 7 | 91,012,114  | 92,764,431  | 2 | 0 | 2 | 1 |
| Case 88 | 7 | 92,764,489  | 94,058,641  | 3 | 0 | 3 | 1 |
| Case 88 | 7 | 94,060,509  | 100,675,761 | 2 | 0 | 2 | 1 |

|         |   |             |             |   |   |   |   |
|---------|---|-------------|-------------|---|---|---|---|
| Case 88 | 7 | 100,675,817 | 100,685,691 | 0 | 0 | 0 | 0 |
| Case 88 | 7 | 100,685,709 | 109,170,014 | 2 | 0 | 2 | 1 |
| Case 88 | 7 | 109,174,062 | 110,602,792 | 3 | 0 | 3 | 1 |
| Case 88 | 7 | 110,603,427 | 117,871,989 | 2 | 0 | 2 | 1 |
| Case 88 | 7 | 117,874,308 | 124,240,452 | 3 | 0 | 3 | 1 |
| Case 88 | 7 | 124,270,732 | 128,587,524 | 2 | 0 | 2 | 1 |
| Case 88 | 7 | 128,588,831 | 129,917,678 | 1 | 0 | 1 | 0 |
| Case 88 | 7 | 129,917,687 | 130,653,616 | 2 | 0 | 2 | 1 |
| Case 88 | 7 | 130,655,734 | 131,478,270 | 1 | 0 | 1 | 0 |
| Case 88 | 7 | 131,480,344 | 132,316,317 | 2 | 0 | 2 | 1 |
| Case 88 | 7 | 132,317,536 | 134,530,915 | 1 | 0 | 1 | 0 |
| Case 88 | 7 | 134,531,076 | 135,021,898 | 2 | 0 | 2 | 1 |
| Case 88 | 7 | 135,023,914 | 136,690,503 | 1 | 0 | 1 | 0 |
| Case 88 | 7 | 136,700,286 | 137,461,581 | 2 | 0 | 2 | 1 |
| Case 88 | 7 | 137,467,829 | 141,287,652 | 1 | 0 | 1 | 0 |
| Case 88 | 7 | 141,311,028 | 142,044,060 | 2 | 0 | 2 | 1 |
| Case 88 | 7 | 142,099,013 | 142,605,840 | 4 | 0 | 4 | 1 |
| Case 88 | 7 | 142,609,699 | 148,456,154 | 3 | 0 | 3 | 1 |
| Case 88 | 7 | 148,456,729 | 148,891,161 | 2 | 0 | 2 | 1 |
| Case 88 | 7 | 148,895,510 | 149,474,913 | 3 | 0 | 3 | 1 |
| Case 88 | 7 | 149,475,053 | 149,528,277 | 4 | 0 | 4 | 1 |
| Case 88 | 7 | 149,529,920 | 151,510,737 | 3 | 0 | 3 | 1 |
| Case 88 | 7 | 151,512,177 | 151,947,973 | 2 | 0 | 2 | 1 |
| Case 88 | 7 | 151,949,068 | 152,551,615 | 1 | 0 | 1 | 0 |
| Case 88 | 7 | 152,561,613 | 157,400,389 | 2 | 0 | 2 | 1 |
| Case 88 | 7 | 157,403,902 | 158,449,357 | 3 | 0 | 3 | 1 |
| Case 88 | 7 | 158,449,369 | 159,119,486 | 2 | 0 | 2 | 1 |
| Case 88 | 8 | 164,984     | 2,005,569   | 1 | 0 | 1 | 0 |
| Case 88 | 8 | 2,005,572   | 2,048,684   | 1 | 1 | 2 | 0 |
| Case 88 | 8 | 2,048,729   | 5,532,124   | 1 | 0 | 1 | 0 |
| Case 88 | 8 | 5,532,738   | 5,599,399   | 1 | 1 | 2 | 0 |
| Case 88 | 8 | 5,601,191   | 9,183,596   | 1 | 0 | 1 | 0 |
| Case 88 | 8 | 9,184,099   | 9,969,692   | 0 | 0 | 0 | 0 |
| Case 88 | 8 | 9,971,054   | 10,286,615  | 1 | 1 | 2 | 0 |
| Case 88 | 8 | 10,287,438  | 10,465,649  | 1 | 0 | 1 | 0 |
| Case 88 | 8 | 10,465,703  | 10,899,288  | 1 | 1 | 2 | 0 |
| Case 88 | 8 | 10,907,051  | 11,704,584  | 1 | 0 | 1 | 0 |
| Case 88 | 8 | 11,704,593  | 11,746,122  | 1 | 1 | 2 | 0 |
| Case 88 | 8 | 11,746,358  | 15,409,171  | 0 | 0 | 0 | 0 |
| Case 88 | 8 | 15,409,462  | 15,409,462  | 2 | 0 | 2 | 1 |
| Case 88 | 8 | 15,410,250  | 20,004,641  | 1 | 0 | 1 | 0 |
| Case 88 | 8 | 20,004,798  | 22,011,721  | 2 | 0 | 2 | 1 |
| Case 88 | 8 | 22,013,943  | 22,374,551  | 1 | 0 | 1 | 0 |
| Case 88 | 8 | 22,374,794  | 22,966,200  | 2 | 0 | 2 | 1 |
| Case 88 | 8 | 22,966,769  | 24,058,590  | 1 | 0 | 1 | 0 |
| Case 88 | 8 | 24,071,487  | 29,814,414  | 2 | 0 | 2 | 1 |
| Case 88 | 8 | 29,818,527  | 30,938,513  | 1 | 0 | 1 | 0 |
| Case 88 | 8 | 30,938,570  | 39,695,662  | 2 | 0 | 2 | 1 |
| Case 88 | 8 | 39,695,671  | 39,873,548  | 0 | 0 | 0 | 0 |
| Case 88 | 8 | 39,880,766  | 41,455,343  | 2 | 0 | 2 | 1 |
| Case 88 | 8 | 41,456,823  | 42,390,679  | 1 | 1 | 2 | 0 |
| Case 88 | 8 | 42,399,906  | 43,791,691  | 1 | 0 | 1 | 0 |
| Case 88 | 8 | 46,886,735  | 49,206,743  | 1 | 0 | 1 | 0 |
| Case 88 | 8 | 49,209,616  | 53,406,508  | 1 | 1 | 2 | 0 |
| Case 88 | 8 | 53,408,434  | 53,796,903  | 1 | 0 | 1 | 0 |
| Case 88 | 8 | 53,796,924  | 54,579,007  | 1 | 1 | 2 | 0 |
| Case 88 | 8 | 54,584,082  | 55,820,605  | 1 | 0 | 1 | 0 |
| Case 88 | 8 | 55,824,925  | 56,119,057  | 1 | 1 | 2 | 0 |
| Case 88 | 8 | 56,120,404  | 57,437,426  | 1 | 0 | 1 | 0 |
| Case 88 | 8 | 57,440,366  | 63,949,912  | 1 | 1 | 2 | 0 |
| Case 88 | 8 | 63,951,237  | 64,296,883  | 1 | 0 | 1 | 0 |

|         |   |             |             |   |   |   |   |
|---------|---|-------------|-------------|---|---|---|---|
| Case 88 | 8 | 64,315,765  | 66,438,548  | 1 | 1 | 2 | 0 |
| Case 88 | 8 | 66,438,842  | 67,059,253  | 1 | 0 | 1 | 0 |
| Case 88 | 8 | 67,061,980  | 67,451,184  | 1 | 1 | 2 | 0 |
| Case 88 | 8 | 67,465,588  | 68,235,165  | 0 | 0 | 0 | 0 |
| Case 88 | 8 | 68,247,863  | 70,605,072  | 1 | 1 | 2 | 0 |
| Case 88 | 8 | 70,605,196  | 71,765,094  | 1 | 0 | 1 | 0 |
| Case 88 | 8 | 71,775,259  | 74,049,175  | 1 | 1 | 2 | 0 |
| Case 88 | 8 | 74,052,613  | 75,154,867  | 1 | 0 | 1 | 0 |
| Case 88 | 8 | 75,156,489  | 77,374,126  | 1 | 1 | 2 | 0 |
| Case 88 | 8 | 77,377,945  | 88,441,967  | 4 | 0 | 4 | 1 |
| Case 88 | 8 | 88,447,135  | 91,375,302  | 5 | 0 | 5 | 1 |
| Case 88 | 8 | 91,377,153  | 95,500,924  | 3 | 0 | 3 | 1 |
| Case 88 | 8 | 95,501,082  | 96,206,803  | 2 | 0 | 2 | 1 |
| Case 88 | 8 | 96,209,033  | 98,583,425  | 3 | 0 | 3 | 1 |
| Case 88 | 8 | 98,585,277  | 99,162,888  | 2 | 0 | 2 | 1 |
| Case 88 | 8 | 99,166,896  | 113,277,705 | 3 | 0 | 3 | 1 |
| Case 88 | 8 | 113,277,717 | 114,979,501 | 4 | 0 | 4 | 1 |
| Case 88 | 8 | 114,980,457 | 120,367,602 | 3 | 0 | 3 | 1 |
| Case 88 | 8 | 120,368,303 | 120,718,441 | 2 | 0 | 2 | 1 |
| Case 88 | 8 | 120,719,691 | 121,183,650 | 1 | 0 | 1 | 0 |
| Case 88 | 8 | 121,190,297 | 122,062,311 | 2 | 0 | 2 | 1 |
| Case 88 | 8 | 122,074,926 | 122,330,471 | 3 | 0 | 3 | 1 |
| Case 88 | 8 | 122,330,565 | 122,761,187 | 2 | 0 | 2 | 1 |
| Case 88 | 8 | 122,766,075 | 124,070,432 | 3 | 0 | 3 | 1 |
| Case 88 | 8 | 124,076,688 | 124,555,833 | 2 | 0 | 2 | 1 |
| Case 88 | 8 | 124,556,006 | 125,407,426 | 3 | 0 | 3 | 1 |
| Case 88 | 8 | 125,418,391 | 126,765,996 | 2 | 0 | 2 | 1 |
| Case 88 | 8 | 126,772,563 | 141,219,996 | 3 | 0 | 3 | 1 |
| Case 88 | 8 | 141,220,019 | 142,170,813 | 1 | 0 | 1 | 0 |
| Case 88 | 8 | 142,170,865 | 145,057,206 | 2 | 1 | 3 | 0 |
| Case 88 | 8 | 145,057,227 | 146,151,479 | 2 | 0 | 2 | 1 |
| Case 88 | 8 | 146,154,001 | 146,293,414 | 4 | 0 | 4 | 1 |
| Case 88 | 9 | 46,587      | 215,329     | 2 | 1 | 3 | 0 |
| Case 88 | 9 | 217,597     | 3,828,319   | 1 | 0 | 1 | 0 |
| Case 88 | 9 | 3,828,355   | 4,177,109   | 2 | 0 | 2 | 1 |
| Case 88 | 9 | 4,177,749   | 6,051,924   | 1 | 0 | 1 | 0 |
| Case 88 | 9 | 6,064,103   | 6,331,274   | 2 | 1 | 3 | 0 |
| Case 88 | 9 | 6,331,324   | 6,851,118   | 1 | 0 | 1 | 0 |
| Case 88 | 9 | 6,855,838   | 7,687,255   | 2 | 1 | 3 | 0 |
| Case 88 | 9 | 7,688,633   | 7,694,465   | 2 | 0 | 2 | 1 |
| Case 88 | 9 | 7,694,484   | 8,533,412   | 3 | 0 | 3 | 1 |
| Case 88 | 9 | 8,534,385   | 8,906,136   | 2 | 0 | 2 | 1 |
| Case 88 | 9 | 8,915,142   | 9,895,814   | 3 | 0 | 3 | 1 |
| Case 88 | 9 | 9,896,971   | 12,163,583  | 2 | 0 | 2 | 1 |
| Case 88 | 9 | 12,165,072  | 13,267,800  | 3 | 0 | 3 | 1 |
| Case 88 | 9 | 13,269,740  | 13,682,981  | 2 | 0 | 2 | 1 |
| Case 88 | 9 | 13,686,028  | 14,678,017  | 3 | 0 | 3 | 1 |
| Case 88 | 9 | 14,678,115  | 16,110,293  | 2 | 0 | 2 | 1 |
| Case 88 | 9 | 16,110,623  | 16,529,174  | 3 | 0 | 3 | 1 |
| Case 88 | 9 | 16,529,554  | 17,759,497  | 2 | 0 | 2 | 1 |
| Case 88 | 9 | 17,760,260  | 18,777,706  | 3 | 0 | 3 | 1 |
| Case 88 | 9 | 18,777,790  | 18,986,580  | 2 | 0 | 2 | 1 |
| Case 88 | 9 | 18,989,696  | 19,446,663  | 1 | 0 | 1 | 0 |
| Case 88 | 9 | 19,451,807  | 20,289,426  | 2 | 0 | 2 | 1 |
| Case 88 | 9 | 20,292,245  | 20,881,957  | 0 | 0 | 0 | 0 |
| Case 88 | 9 | 20,883,241  | 26,687,936  | 1 | 0 | 1 | 0 |
| Case 88 | 9 | 26,689,442  | 27,412,769  | 0 | 0 | 0 | 0 |
| Case 88 | 9 | 27,414,808  | 27,467,670  | 1 | 1 | 2 | 0 |
| Case 88 | 9 | 27,468,461  | 28,705,607  | 1 | 0 | 1 | 0 |
| Case 88 | 9 | 28,705,864  | 31,136,986  | 2 | 0 | 2 | 1 |
| Case 88 | 9 | 31,146,393  | 32,110,072  | 3 | 0 | 3 | 1 |

|         |    |             |             |   |   |   |   |
|---------|----|-------------|-------------|---|---|---|---|
| Case 88 | 9  | 32,110,777  | 33,810,791  | 2 | 0 | 2 | 1 |
| Case 88 | 9  | 33,818,257  | 34,237,480  | 1 | 0 | 1 | 0 |
| Case 88 | 9  | 34,240,205  | 46,944,322  | 2 | 0 | 2 | 1 |
| Case 88 | 9  | 65,629,772  | 68,838,523  | 2 | 0 | 2 | 1 |
| Case 88 | 9  | 69,108,060  | 71,549,847  | 2 | 1 | 3 | 0 |
| Case 88 | 9  | 71,551,140  | 71,849,766  | 1 | 1 | 2 | 0 |
| Case 88 | 9  | 71,850,141  | 74,445,353  | 2 | 1 | 3 | 0 |
| Case 88 | 9  | 74,463,295  | 75,229,248  | 1 | 0 | 1 | 0 |
| Case 88 | 9  | 75,231,217  | 77,415,284  | 2 | 1 | 3 | 0 |
| Case 88 | 9  | 77,416,972  | 77,727,884  | 1 | 1 | 2 | 0 |
| Case 88 | 9  | 77,737,029  | 78,931,893  | 2 | 1 | 3 | 0 |
| Case 88 | 9  | 78,932,693  | 81,100,971  | 1 | 1 | 2 | 0 |
| Case 88 | 9  | 81,101,590  | 84,205,867  | 2 | 1 | 3 | 0 |
| Case 88 | 9  | 84,205,928  | 84,305,732  | 1 | 1 | 2 | 0 |
| Case 88 | 9  | 84,308,948  | 84,605,293  | 1 | 0 | 1 | 0 |
| Case 88 | 9  | 84,605,716  | 86,258,564  | 2 | 1 | 3 | 0 |
| Case 88 | 9  | 86,258,685  | 86,691,975  | 1 | 1 | 2 | 0 |
| Case 88 | 9  | 86,693,470  | 86,939,823  | 2 | 1 | 3 | 0 |
| Case 88 | 9  | 86,940,014  | 87,160,854  | 1 | 1 | 2 | 0 |
| Case 88 | 9  | 87,167,205  | 88,353,231  | 2 | 1 | 3 | 0 |
| Case 88 | 9  | 88,357,495  | 90,762,031  | 1 | 1 | 2 | 0 |
| Case 88 | 9  | 90,763,539  | 91,259,439  | 1 | 0 | 1 | 0 |
| Case 88 | 9  | 91,260,562  | 91,262,296  | 1 | 1 | 2 | 0 |
| Case 88 | 9  | 91,262,347  | 91,635,785  | 2 | 1 | 3 | 0 |
| Case 88 | 9  | 91,637,304  | 95,086,352  | 1 | 1 | 2 | 0 |
| Case 88 | 9  | 95,087,824  | 95,263,179  | 1 | 0 | 1 | 0 |
| Case 88 | 9  | 95,263,216  | 95,586,719  | 1 | 1 | 2 | 0 |
| Case 88 | 9  | 95,590,093  | 95,753,319  | 1 | 0 | 1 | 0 |
| Case 88 | 9  | 95,765,234  | 96,870,198  | 1 | 1 | 2 | 0 |
| Case 88 | 9  | 96,873,151  | 97,334,274  | 1 | 0 | 1 | 0 |
| Case 88 | 9  | 97,337,835  | 98,970,911  | 1 | 1 | 2 | 0 |
| Case 88 | 9  | 98,972,430  | 100,049,972 | 1 | 0 | 1 | 0 |
| Case 88 | 9  | 100,051,415 | 107,665,751 | 1 | 1 | 2 | 0 |
| Case 88 | 9  | 107,666,513 | 108,125,138 | 1 | 0 | 1 | 0 |
| Case 88 | 9  | 108,125,144 | 114,069,273 | 1 | 1 | 2 | 0 |
| Case 88 | 9  | 114,078,716 | 115,216,344 | 1 | 0 | 1 | 0 |
| Case 88 | 9  | 115,216,441 | 116,715,706 | 1 | 1 | 2 | 0 |
| Case 88 | 9  | 116,722,693 | 117,004,489 | 2 | 1 | 3 | 0 |
| Case 88 | 9  | 117,004,955 | 127,662,748 | 1 | 1 | 2 | 0 |
| Case 88 | 9  | 127,670,702 | 128,137,615 | 1 | 0 | 1 | 0 |
| Case 88 | 9  | 128,141,348 | 135,926,017 | 1 | 1 | 2 | 0 |
| Case 88 | 9  | 135,926,241 | 136,379,838 | 2 | 1 | 3 | 0 |
| Case 88 | 9  | 136,384,124 | 140,008,771 | 2 | 2 | 4 | 0 |
| Case 88 | 9  | 140,018,138 | 140,201,614 | 2 | 1 | 3 | 0 |
| Case 88 | 9  | 140,201,671 | 140,325,962 | 1 | 1 | 2 | 0 |
| Case 88 | 9  | 140,327,663 | 140,526,439 | 2 | 1 | 3 | 0 |
| Case 88 | 9  | 140,542,378 | 140,964,758 | 1 | 1 | 2 | 0 |
| Case 88 | 9  | 140,968,222 | 141,066,491 | 2 | 1 | 3 | 0 |
| Case 88 | 10 | 98,087      | 410,501     | 2 | 1 | 3 | 0 |
| Case 88 | 10 | 412,449     | 1,183,739   | 1 | 1 | 2 | 0 |
| Case 88 | 10 | 1,185,306   | 2,021,054   | 2 | 1 | 3 | 0 |
| Case 88 | 10 | 2,022,323   | 11,762,016  | 1 | 1 | 2 | 0 |
| Case 88 | 10 | 11,764,098  | 12,752,638  | 1 | 0 | 1 | 0 |
| Case 88 | 10 | 12,754,862  | 14,651,346  | 1 | 1 | 2 | 0 |
| Case 88 | 10 | 14,652,933  | 15,575,030  | 1 | 0 | 1 | 0 |
| Case 88 | 10 | 15,576,783  | 16,100,091  | 1 | 1 | 2 | 0 |
| Case 88 | 10 | 16,116,747  | 25,725,491  | 1 | 0 | 1 | 0 |
| Case 88 | 10 | 25,726,938  | 26,574,893  | 1 | 1 | 2 | 0 |
| Case 88 | 10 | 26,575,221  | 27,669,655  | 1 | 0 | 1 | 0 |
| Case 88 | 10 | 27,673,128  | 32,273,277  | 2 | 0 | 2 | 1 |
| Case 88 | 10 | 32,278,603  | 32,678,925  | 1 | 0 | 1 | 0 |

|         |    |             |             |   |   |   |   |
|---------|----|-------------|-------------|---|---|---|---|
| Case 88 | 10 | 32,684,126  | 35,028,713  | 2 | 0 | 2 | 1 |
| Case 88 | 10 | 35,031,758  | 35,755,345  | 1 | 0 | 1 | 0 |
| Case 88 | 10 | 35,772,405  | 38,672,399  | 2 | 0 | 2 | 1 |
| Case 88 | 10 | 38,674,609  | 39,097,912  | 1 | 0 | 1 | 0 |
| Case 88 | 10 | 42,436,301  | 43,441,729  | 1 | 0 | 1 | 0 |
| Case 88 | 10 | 43,444,167  | 44,846,451  | 1 | 1 | 2 | 0 |
| Case 88 | 10 | 44,849,350  | 45,464,100  | 2 | 1 | 3 | 0 |
| Case 88 | 10 | 45,465,678  | 45,500,221  | 3 | 1 | 4 | 0 |
| Case 88 | 10 | 45,504,012  | 46,290,340  | 2 | 0 | 2 | 1 |
| Case 88 | 10 | 46,518,615  | 47,543,322  | 4 | 0 | 4 | 1 |
| Case 88 | 10 | 47,543,535  | 48,370,683  | 2 | 0 | 2 | 1 |
| Case 88 | 10 | 48,370,731  | 49,853,274  | 2 | 1 | 3 | 0 |
| Case 88 | 10 | 49,856,349  | 50,960,232  | 3 | 1 | 4 | 0 |
| Case 88 | 10 | 50,964,656  | 52,842,355  | 2 | 0 | 2 | 1 |
| Case 88 | 10 | 52,842,575  | 53,851,164  | 2 | 1 | 3 | 0 |
| Case 88 | 10 | 53,852,736  | 54,629,426  | 2 | 0 | 2 | 1 |
| Case 88 | 10 | 54,635,124  | 54,990,473  | 3 | 1 | 4 | 0 |
| Case 88 | 10 | 54,991,244  | 58,885,646  | 2 | 0 | 2 | 1 |
| Case 88 | 10 | 58,892,275  | 58,938,552  | 0 | 0 | 0 | 0 |
| Case 88 | 10 | 58,941,396  | 59,013,036  | 2 | 0 | 2 | 1 |
| Case 88 | 10 | 59,018,855  | 59,582,520  | 3 | 0 | 3 | 1 |
| Case 88 | 10 | 59,582,901  | 60,610,919  | 2 | 0 | 2 | 1 |
| Case 88 | 10 | 60,614,717  | 61,208,949  | 3 | 0 | 3 | 1 |
| Case 88 | 10 | 61,210,179  | 61,998,060  | 2 | 0 | 2 | 1 |
| Case 88 | 10 | 62,008,708  | 64,610,718  | 3 | 0 | 3 | 1 |
| Case 88 | 10 | 64,615,451  | 64,847,409  | 2 | 0 | 2 | 1 |
| Case 88 | 10 | 64,848,773  | 65,385,520  | 1 | 0 | 1 | 0 |
| Case 88 | 10 | 65,391,113  | 65,694,772  | 2 | 0 | 2 | 1 |
| Case 88 | 10 | 65,700,878  | 67,495,478  | 3 | 0 | 3 | 1 |
| Case 88 | 10 | 67,496,301  | 69,543,385  | 2 | 0 | 2 | 1 |
| Case 88 | 10 | 69,546,194  | 70,573,834  | 1 | 0 | 1 | 0 |
| Case 88 | 10 | 70,577,222  | 70,667,461  | 2 | 0 | 2 | 1 |
| Case 88 | 10 | 70,670,072  | 71,088,538  | 3 | 0 | 3 | 1 |
| Case 88 | 10 | 71,091,013  | 73,849,639  | 4 | 0 | 4 | 1 |
| Case 88 | 10 | 73,855,115  | 75,871,844  | 2 | 0 | 2 | 1 |
| Case 88 | 10 | 75,873,961  | 77,879,106  | 3 | 0 | 3 | 1 |
| Case 88 | 10 | 77,881,218  | 78,945,858  | 4 | 0 | 4 | 1 |
| Case 88 | 10 | 78,949,728  | 79,814,747  | 3 | 0 | 3 | 1 |
| Case 88 | 10 | 79,819,308  | 81,682,527  | 4 | 0 | 4 | 1 |
| Case 88 | 10 | 81,684,075  | 82,452,030  | 2 | 0 | 2 | 1 |
| Case 88 | 10 | 82,452,051  | 83,828,693  | 3 | 0 | 3 | 1 |
| Case 88 | 10 | 83,831,519  | 88,602,368  | 2 | 0 | 2 | 1 |
| Case 88 | 10 | 88,603,966  | 90,122,388  | 1 | 0 | 1 | 0 |
| Case 88 | 10 | 90,122,468  | 90,699,265  | 2 | 0 | 2 | 1 |
| Case 88 | 10 | 90,710,975  | 93,643,371  | 1 | 0 | 1 | 0 |
| Case 88 | 10 | 93,644,552  | 94,814,907  | 0 | 0 | 0 | 0 |
| Case 88 | 10 | 94,819,053  | 94,821,204  | 2 | 0 | 2 | 1 |
| Case 88 | 10 | 94,821,903  | 94,822,350  | 1 | 0 | 1 | 0 |
| Case 88 | 10 | 94,822,580  | 94,822,669  | 2 | 0 | 2 | 1 |
| Case 88 | 10 | 94,824,145  | 99,624,937  | 1 | 0 | 1 | 0 |
| Case 88 | 10 | 99,625,319  | 99,846,671  | 2 | 1 | 3 | 0 |
| Case 88 | 10 | 99,847,987  | 101,284,637 | 2 | 0 | 2 | 1 |
| Case 88 | 10 | 101,287,764 | 102,242,519 | 1 | 0 | 1 | 0 |
| Case 88 | 10 | 102,243,387 | 108,555,958 | 2 | 0 | 2 | 1 |
| Case 88 | 10 | 108,559,699 | 114,833,850 | 1 | 0 | 1 | 0 |
| Case 88 | 10 | 114,834,498 | 115,412,708 | 2 | 0 | 2 | 1 |
| Case 88 | 10 | 115,412,757 | 119,573,470 | 1 | 0 | 1 | 0 |
| Case 88 | 10 | 119,576,277 | 120,371,617 | 2 | 0 | 2 | 1 |
| Case 88 | 10 | 120,381,018 | 121,356,382 | 1 | 0 | 1 | 0 |
| Case 88 | 10 | 121,357,825 | 124,041,447 | 2 | 0 | 2 | 1 |
| Case 88 | 10 | 124,041,701 | 125,242,283 | 3 | 0 | 3 | 1 |

|         |    |             |             |   |   |   |   |
|---------|----|-------------|-------------|---|---|---|---|
| Case 88 | 10 | 125,245,215 | 126,007,164 | 2 | 0 | 2 | 1 |
| Case 88 | 10 | 126,007,929 | 126,672,779 | 1 | 0 | 1 | 0 |
| Case 88 | 10 | 126,673,998 | 126,764,413 | 2 | 0 | 2 | 1 |
| Case 88 | 10 | 126,773,746 | 127,859,846 | 1 | 0 | 1 | 0 |
| Case 88 | 10 | 127,862,926 | 130,580,494 | 2 | 0 | 2 | 1 |
| Case 88 | 10 | 130,581,094 | 132,607,399 | 2 | 1 | 3 | 0 |
| Case 88 | 10 | 132,608,211 | 132,992,902 | 2 | 0 | 2 | 1 |
| Case 88 | 10 | 132,993,796 | 135,180,455 | 2 | 1 | 3 | 0 |
| Case 88 | 10 | 135,183,094 | 135,477,883 | 3 | 1 | 4 | 0 |
| Case 88 | 11 | 193,146     | 499,965     | 2 | 1 | 3 | 0 |
| Case 88 | 11 | 500,566     | 609,358     | 1 | 1 | 2 | 0 |
| Case 88 | 11 | 609,553     | 1,033,055   | 2 | 1 | 3 | 0 |
| Case 88 | 11 | 1,037,029   | 1,084,753   | 1 | 0 | 1 | 0 |
| Case 88 | 11 | 1,084,801   | 1,309,985   | 2 | 1 | 3 | 0 |
| Case 88 | 11 | 1,309,988   | 3,661,036   | 1 | 1 | 2 | 0 |
| Case 88 | 11 | 3,661,052   | 4,213,853   | 1 | 0 | 1 | 0 |
| Case 88 | 11 | 4,215,172   | 8,662,310   | 1 | 1 | 2 | 0 |
| Case 88 | 11 | 8,662,501   | 9,199,735   | 1 | 0 | 1 | 0 |
| Case 88 | 11 | 9,199,780   | 9,679,145   | 0 | 0 | 0 | 0 |
| Case 88 | 11 | 9,685,741   | 10,295,144  | 1 | 0 | 1 | 0 |
| Case 88 | 11 | 10,296,667  | 17,037,793  | 1 | 1 | 2 | 0 |
| Case 88 | 11 | 17,062,454  | 17,352,470  | 1 | 0 | 1 | 0 |
| Case 88 | 11 | 17,369,517  | 18,267,027  | 1 | 1 | 2 | 0 |
| Case 88 | 11 | 18,267,057  | 18,729,488  | 1 | 0 | 1 | 0 |
| Case 88 | 11 | 18,729,525  | 31,012,090  | 1 | 1 | 2 | 0 |
| Case 88 | 11 | 31,027,219  | 32,604,045  | 2 | 1 | 3 | 0 |
| Case 88 | 11 | 32,608,473  | 33,375,034  | 2 | 0 | 2 | 1 |
| Case 88 | 11 | 33,376,095  | 43,957,859  | 2 | 1 | 3 | 0 |
| Case 88 | 11 | 43,960,386  | 43,972,609  | 1 | 1 | 2 | 0 |
| Case 88 | 11 | 43,975,742  | 46,401,108  | 2 | 2 | 4 | 0 |
| Case 88 | 11 | 46,406,715  | 47,609,867  | 1 | 1 | 2 | 0 |
| Case 88 | 11 | 47,610,080  | 48,085,968  | 1 | 0 | 1 | 0 |
| Case 88 | 11 | 48,097,480  | 48,558,249  | 2 | 0 | 2 | 1 |
| Case 88 | 11 | 48,581,765  | 49,010,832  | 0 | 0 | 0 | 0 |
| Case 88 | 11 | 49,018,666  | 50,170,337  | 2 | 0 | 2 | 1 |
| Case 88 | 11 | 50,179,838  | 51,591,253  | 0 | 0 | 0 | 0 |
| Case 88 | 11 | 54,794,237  | 55,111,584  | 0 | 0 | 0 | 0 |
| Case 88 | 11 | 55,121,706  | 55,340,204  | 2 | 0 | 2 | 1 |
| Case 88 | 11 | 55,340,210  | 55,432,646  | 0 | 0 | 0 | 0 |
| Case 88 | 11 | 55,432,668  | 63,327,654  | 2 | 0 | 2 | 1 |
| Case 88 | 11 | 63,332,054  | 63,620,253  | 1 | 0 | 1 | 0 |
| Case 88 | 11 | 63,639,881  | 64,046,641  | 2 | 0 | 2 | 1 |
| Case 88 | 11 | 64,046,885  | 64,123,095  | 3 | 0 | 3 | 1 |
| Case 88 | 11 | 64,124,515  | 71,850,722  | 2 | 0 | 2 | 1 |
| Case 88 | 11 | 71,850,785  | 73,372,299  | 1 | 1 | 2 | 0 |
| Case 88 | 11 | 73,373,552  | 73,679,447  | 1 | 0 | 1 | 0 |
| Case 88 | 11 | 73,679,453  | 77,309,533  | 1 | 1 | 2 | 0 |
| Case 88 | 11 | 77,311,445  | 77,870,486  | 1 | 0 | 1 | 0 |
| Case 88 | 11 | 77,875,386  | 78,476,557  | 1 | 1 | 2 | 0 |
| Case 88 | 11 | 78,483,823  | 78,915,775  | 2 | 2 | 4 | 0 |
| Case 88 | 11 | 78,915,933  | 80,051,161  | 2 | 1 | 3 | 0 |
| Case 88 | 11 | 80,052,487  | 98,342,466  | 1 | 1 | 2 | 0 |
| Case 88 | 11 | 98,343,637  | 98,890,724  | 1 | 0 | 1 | 0 |
| Case 88 | 11 | 98,894,022  | 101,821,444 | 1 | 1 | 2 | 0 |
| Case 88 | 11 | 101,824,479 | 102,357,279 | 1 | 0 | 1 | 0 |
| Case 88 | 11 | 102,358,107 | 107,397,587 | 1 | 1 | 2 | 0 |
| Case 88 | 11 | 107,398,698 | 108,509,754 | 1 | 0 | 1 | 0 |
| Case 88 | 11 | 108,525,801 | 109,899,405 | 1 | 1 | 2 | 0 |
| Case 88 | 11 | 109,900,455 | 110,336,182 | 1 | 0 | 1 | 0 |
| Case 88 | 11 | 110,341,416 | 111,595,189 | 1 | 1 | 2 | 0 |
| Case 88 | 11 | 111,597,442 | 112,138,835 | 1 | 0 | 1 | 0 |

|         |    |             |             |   |   |   |   |
|---------|----|-------------|-------------|---|---|---|---|
| Case 88 | 11 | 112,139,158 | 113,009,703 | 1 | 1 | 2 | 0 |
| Case 88 | 11 | 113,011,346 | 113,346,955 | 2 | 1 | 3 | 0 |
| Case 88 | 11 | 113,355,736 | 115,104,172 | 1 | 1 | 2 | 0 |
| Case 88 | 11 | 115,104,646 | 116,226,845 | 2 | 1 | 3 | 0 |
| Case 88 | 11 | 116,227,259 | 117,242,072 | 1 | 1 | 2 | 0 |
| Case 88 | 11 | 117,242,165 | 118,210,195 | 2 | 1 | 3 | 0 |
| Case 88 | 11 | 118,211,162 | 118,940,182 | 1 | 1 | 2 | 0 |
| Case 88 | 11 | 118,940,957 | 122,314,282 | 2 | 1 | 3 | 0 |
| Case 88 | 11 | 122,317,996 | 123,562,397 | 1 | 1 | 2 | 0 |
| Case 88 | 11 | 123,564,532 | 129,202,156 | 2 | 1 | 3 | 0 |
| Case 88 | 11 | 129,202,392 | 130,271,647 | 1 | 1 | 2 | 0 |
| Case 88 | 11 | 130,275,346 | 132,269,933 | 2 | 1 | 3 | 0 |
| Case 88 | 11 | 132,273,291 | 134,117,015 | 1 | 1 | 2 | 0 |
| Case 88 | 11 | 134,119,132 | 134,359,194 | 2 | 1 | 3 | 0 |
| Case 88 | 11 | 134,359,886 | 134,621,010 | 1 | 1 | 2 | 0 |
| Case 88 | 11 | 134,622,564 | 134,934,063 | 2 | 2 | 4 | 0 |
| Case 88 | 12 | 191,619     | 248,071     | 7 | 0 | 7 | 1 |
| Case 88 | 12 | 249,007     | 249,007     | 5 | 0 | 5 | 1 |
| Case 88 | 12 | 250,130     | 638,166     | 4 | 0 | 4 | 1 |
| Case 88 | 12 | 644,337     | 1,354,345   | 3 | 0 | 3 | 1 |
| Case 88 | 12 | 1,357,860   | 5,456,264   | 4 | 0 | 4 | 1 |
| Case 88 | 12 | 5,456,976   | 6,173,538   | 3 | 0 | 3 | 1 |
| Case 88 | 12 | 6,174,729   | 7,880,551   | 2 | 0 | 2 | 1 |
| Case 88 | 12 | 7,882,199   | 8,267,225   | 1 | 0 | 1 | 0 |
| Case 88 | 12 | 8,270,922   | 13,459,029  | 2 | 0 | 2 | 1 |
| Case 88 | 12 | 13,460,880  | 14,101,954  | 3 | 0 | 3 | 1 |
| Case 88 | 12 | 14,104,442  | 16,552,279  | 2 | 0 | 2 | 1 |
| Case 88 | 12 | 16,562,400  | 16,934,292  | 3 | 0 | 3 | 1 |
| Case 88 | 12 | 16,936,369  | 18,414,253  | 2 | 0 | 2 | 1 |
| Case 88 | 12 | 18,416,494  | 19,211,642  | 2 | 2 | 4 | 0 |
| Case 88 | 12 | 19,217,690  | 19,841,659  | 1 | 1 | 2 | 0 |
| Case 88 | 12 | 19,843,854  | 25,014,276  | 2 | 2 | 4 | 0 |
| Case 88 | 12 | 25,022,598  | 26,166,534  | 2 | 1 | 3 | 0 |
| Case 88 | 12 | 26,171,593  | 26,687,654  | 2 | 2 | 4 | 0 |
| Case 88 | 12 | 26,689,621  | 27,877,003  | 2 | 1 | 3 | 0 |
| Case 88 | 12 | 27,890,497  | 28,073,965  | 1 | 1 | 2 | 0 |
| Case 88 | 12 | 28,075,600  | 31,406,809  | 2 | 2 | 4 | 0 |
| Case 88 | 12 | 31,406,907  | 33,185,601  | 1 | 1 | 2 | 0 |
| Case 88 | 12 | 33,192,192  | 34,200,389  | 2 | 2 | 4 | 0 |
| Case 88 | 12 | 34,210,675  | 34,810,203  | 1 | 1 | 2 | 0 |
| Case 88 | 12 | 34,819,926  | 34,853,011  | 1 | 0 | 1 | 0 |
| Case 88 | 12 | 37,876,400  | 38,642,772  | 1 | 0 | 1 | 0 |
| Case 88 | 12 | 38,647,828  | 41,955,272  | 1 | 1 | 2 | 0 |
| Case 88 | 12 | 41,958,100  | 42,057,459  | 2 | 1 | 3 | 0 |
| Case 88 | 12 | 42,072,698  | 42,287,373  | 3 | 1 | 4 | 0 |
| Case 88 | 12 | 42,288,768  | 43,063,026  | 2 | 0 | 2 | 1 |
| Case 88 | 12 | 43,063,188  | 43,152,847  | 2 | 1 | 3 | 0 |
| Case 88 | 12 | 43,153,849  | 44,132,928  | 3 | 1 | 4 | 0 |
| Case 88 | 12 | 44,134,417  | 44,782,265  | 2 | 1 | 3 | 0 |
| Case 88 | 12 | 44,782,279  | 45,547,736  | 3 | 1 | 4 | 0 |
| Case 88 | 12 | 45,548,772  | 47,072,741  | 2 | 1 | 3 | 0 |
| Case 88 | 12 | 47,093,014  | 47,461,183  | 3 | 1 | 4 | 0 |
| Case 88 | 12 | 47,463,575  | 47,782,209  | 2 | 0 | 2 | 1 |
| Case 88 | 12 | 47,784,221  | 48,596,905  | 2 | 1 | 3 | 0 |
| Case 88 | 12 | 48,596,967  | 50,551,543  | 1 | 1 | 2 | 0 |
| Case 88 | 12 | 50,560,980  | 51,596,763  | 1 | 0 | 1 | 0 |
| Case 88 | 12 | 51,609,600  | 52,393,208  | 1 | 1 | 2 | 0 |
| Case 88 | 12 | 52,396,544  | 53,101,668  | 2 | 2 | 4 | 0 |
| Case 88 | 12 | 53,102,196  | 53,453,014  | 2 | 1 | 3 | 0 |
| Case 88 | 12 | 53,453,281  | 57,323,523  | 1 | 1 | 2 | 0 |
| Case 88 | 12 | 57,324,019  | 57,643,001  | 2 | 1 | 3 | 0 |



|         |    |             |             |   |   |   |   |
|---------|----|-------------|-------------|---|---|---|---|
| Case 88 | 12 | 57,643,205  | 58,396,973  | 1 | 1 | 2 | 0 |
| Case 88 | 12 | 58,403,744  | 60,861,909  | 2 | 1 | 3 | 0 |
| Case 88 | 12 | 60,863,550  | 63,463,557  | 1 | 1 | 2 | 0 |
| Case 88 | 12 | 63,466,131  | 63,792,080  | 2 | 1 | 3 | 0 |
| Case 88 | 12 | 63,792,298  | 64,764,152  | 1 | 1 | 2 | 0 |
| Case 88 | 12 | 64,777,704  | 65,270,150  | 1 | 0 | 1 | 0 |
| Case 88 | 12 | 65,270,216  | 68,817,323  | 2 | 0 | 2 | 1 |
| Case 88 | 12 | 68,823,115  | 69,806,747  | 1 | 0 | 1 | 0 |
| Case 88 | 12 | 69,808,865  | 74,007,403  | 2 | 0 | 2 | 1 |
| Case 88 | 12 | 74,012,068  | 75,900,262  | 2 | 1 | 3 | 0 |
| Case 88 | 12 | 75,900,382  | 77,911,322  | 1 | 1 | 2 | 0 |
| Case 88 | 12 | 77,925,677  | 79,849,791  | 2 | 1 | 3 | 0 |
| Case 88 | 12 | 79,864,633  | 80,690,872  | 1 | 1 | 2 | 0 |
| Case 88 | 12 | 80,690,919  | 82,914,248  | 2 | 1 | 3 | 0 |
| Case 88 | 12 | 82,918,667  | 83,753,247  | 1 | 1 | 2 | 0 |
| Case 88 | 12 | 83,755,167  | 89,589,948  | 2 | 1 | 3 | 0 |
| Case 88 | 12 | 89,593,960  | 90,273,298  | 1 | 1 | 2 | 0 |
| Case 88 | 12 | 90,277,578  | 92,377,558  | 2 | 1 | 3 | 0 |
| Case 88 | 12 | 92,384,658  | 95,179,179  | 1 | 1 | 2 | 0 |
| Case 88 | 12 | 95,179,862  | 96,123,609  | 1 | 0 | 1 | 0 |
| Case 88 | 12 | 96,124,901  | 96,653,501  | 1 | 1 | 2 | 0 |
| Case 88 | 12 | 96,653,599  | 97,053,639  | 1 | 0 | 1 | 0 |
| Case 88 | 12 | 97,053,902  | 98,606,472  | 2 | 1 | 3 | 0 |
| Case 88 | 12 | 98,608,519  | 99,612,149  | 1 | 1 | 2 | 0 |
| Case 88 | 12 | 99,624,689  | 100,230,985 | 2 | 1 | 3 | 0 |
| Case 88 | 12 | 100,243,554 | 100,272,231 | 1 | 1 | 2 | 0 |
| Case 88 | 12 | 100,278,040 | 100,657,491 | 1 | 0 | 1 | 0 |
| Case 88 | 12 | 100,657,515 | 102,718,009 | 1 | 1 | 2 | 0 |
| Case 88 | 12 | 102,726,338 | 104,076,999 | 2 | 1 | 3 | 0 |
| Case 88 | 12 | 104,080,598 | 105,842,283 | 1 | 1 | 2 | 0 |
| Case 88 | 12 | 105,846,410 | 106,542,947 | 2 | 1 | 3 | 0 |
| Case 88 | 12 | 106,547,004 | 108,061,806 | 1 | 1 | 2 | 0 |
| Case 88 | 12 | 108,062,373 | 108,726,546 | 2 | 1 | 3 | 0 |
| Case 88 | 12 | 108,731,605 | 110,471,609 | 1 | 1 | 2 | 0 |
| Case 88 | 12 | 110,471,635 | 111,082,827 | 1 | 0 | 1 | 0 |
| Case 88 | 12 | 111,082,911 | 111,910,219 | 1 | 1 | 2 | 0 |
| Case 88 | 12 | 111,911,285 | 112,919,869 | 1 | 0 | 1 | 0 |
| Case 88 | 12 | 112,923,361 | 113,055,215 | 2 | 1 | 3 | 0 |
| Case 88 | 12 | 113,055,883 | 113,448,288 | 3 | 1 | 4 | 0 |
| Case 88 | 12 | 113,448,652 | 113,873,337 | 2 | 1 | 3 | 0 |
| Case 88 | 12 | 113,874,590 | 114,962,158 | 3 | 1 | 4 | 0 |
| Case 88 | 12 | 114,969,763 | 115,387,033 | 2 | 0 | 2 | 1 |
| Case 88 | 12 | 115,387,796 | 117,693,037 | 2 | 1 | 3 | 0 |
| Case 88 | 12 | 117,693,744 | 118,137,365 | 3 | 1 | 4 | 0 |
| Case 88 | 12 | 118,139,540 | 119,095,239 | 2 | 0 | 2 | 1 |
| Case 88 | 12 | 119,104,574 | 120,098,008 | 3 | 0 | 3 | 1 |
| Case 88 | 12 | 120,098,409 | 122,693,095 | 2 | 0 | 2 | 1 |
| Case 88 | 12 | 122,693,107 | 123,131,824 | 1 | 0 | 1 | 0 |
| Case 88 | 12 | 123,145,864 | 124,325,360 | 2 | 0 | 2 | 1 |
| Case 88 | 12 | 124,325,977 | 129,264,449 | 3 | 0 | 3 | 1 |
| Case 88 | 12 | 129,266,496 | 129,500,352 | 2 | 0 | 2 | 1 |
| Case 88 | 12 | 129,500,451 | 132,401,102 | 3 | 0 | 3 | 1 |
| Case 88 | 12 | 132,401,542 | 132,402,007 | 6 | 1 | 7 | 0 |
| Case 88 | 12 | 132,403,161 | 133,728,485 | 3 | 0 | 3 | 1 |
| Case 88 | 12 | 133,729,999 | 133,732,580 | 4 | 0 | 4 | 1 |
| Case 88 | 12 | 133,732,604 | 133,810,935 | 5 | 0 | 5 | 1 |
| Case 88 | 13 | 19,058,717  | 20,154,390  | 2 | 0 | 2 | 1 |
| Case 88 | 13 | 20,159,017  | 20,749,239  | 1 | 0 | 1 | 0 |
| Case 88 | 13 | 20,750,106  | 21,165,139  | 2 | 0 | 2 | 1 |
| Case 88 | 13 | 21,165,145  | 21,682,068  | 1 | 0 | 1 | 0 |
| Case 88 | 13 | 21,683,169  | 21,750,890  | 2 | 0 | 2 | 1 |

|         |    |             |             |   |   |   |   |
|---------|----|-------------|-------------|---|---|---|---|
| Case 88 | 13 | 21,751,052  | 22,241,766  | 0 | 0 | 0 | 0 |
| Case 88 | 13 | 22,243,370  | 23,090,263  | 1 | 1 | 2 | 0 |
| Case 88 | 13 | 23,091,684  | 24,243,247  | 1 | 0 | 1 | 0 |
| Case 88 | 13 | 24,243,360  | 25,094,406  | 1 | 1 | 2 | 0 |
| Case 88 | 13 | 25,094,789  | 38,203,427  | 2 | 0 | 2 | 1 |
| Case 88 | 13 | 38,204,517  | 39,949,981  | 2 | 1 | 3 | 0 |
| Case 88 | 13 | 39,950,178  | 40,159,333  | 2 | 0 | 2 | 1 |
| Case 88 | 13 | 40,162,979  | 40,297,530  | 2 | 1 | 3 | 0 |
| Case 88 | 13 | 40,297,684  | 40,572,070  | 3 | 1 | 4 | 0 |
| Case 88 | 13 | 40,593,772  | 43,754,499  | 2 | 0 | 2 | 1 |
| Case 88 | 13 | 43,754,772  | 44,559,045  | 2 | 1 | 3 | 0 |
| Case 88 | 13 | 44,559,850  | 47,337,846  | 2 | 0 | 2 | 1 |
| Case 88 | 13 | 47,345,330  | 48,329,771  | 2 | 1 | 3 | 0 |
| Case 88 | 13 | 48,331,291  | 53,419,675  | 2 | 0 | 2 | 1 |
| Case 88 | 13 | 53,420,234  | 57,353,820  | 2 | 1 | 3 | 0 |
| Case 88 | 13 | 57,358,169  | 58,000,353  | 2 | 0 | 2 | 1 |
| Case 88 | 13 | 58,004,699  | 58,156,310  | 2 | 1 | 3 | 0 |
| Case 88 | 13 | 58,158,127  | 59,151,845  | 3 | 1 | 4 | 0 |
| Case 88 | 13 | 59,152,021  | 60,454,928  | 2 | 0 | 2 | 1 |
| Case 88 | 13 | 60,456,938  | 61,423,727  | 3 | 0 | 3 | 1 |
| Case 88 | 13 | 61,424,293  | 61,450,130  | 2 | 0 | 2 | 1 |
| Case 88 | 13 | 61,451,581  | 61,462,011  | 2 | 1 | 3 | 0 |
| Case 88 | 13 | 61,471,698  | 62,316,640  | 3 | 1 | 4 | 0 |
| Case 88 | 13 | 62,321,073  | 69,219,073  | 1 | 1 | 2 | 0 |
| Case 88 | 13 | 69,223,307  | 69,518,579  | 1 | 0 | 1 | 0 |
| Case 88 | 13 | 69,520,062  | 69,771,072  | 2 | 0 | 2 | 1 |
| Case 88 | 13 | 69,772,154  | 71,793,157  | 1 | 0 | 1 | 0 |
| Case 88 | 13 | 71,797,243  | 73,047,250  | 2 | 0 | 2 | 1 |
| Case 88 | 13 | 73,048,219  | 88,327,997  | 1 | 0 | 1 | 0 |
| Case 88 | 13 | 88,328,029  | 89,059,916  | 2 | 0 | 2 | 1 |
| Case 88 | 13 | 89,060,155  | 91,426,610  | 1 | 0 | 1 | 0 |
| Case 88 | 13 | 91,427,218  | 95,163,152  | 1 | 1 | 2 | 0 |
| Case 88 | 13 | 95,166,661  | 96,511,868  | 1 | 0 | 1 | 0 |
| Case 88 | 13 | 96,515,890  | 98,509,302  | 1 | 1 | 2 | 0 |
| Case 88 | 13 | 98,509,346  | 98,774,904  | 1 | 0 | 1 | 0 |
| Case 88 | 13 | 98,776,396  | 99,668,881  | 1 | 1 | 2 | 0 |
| Case 88 | 13 | 99,670,271  | 101,135,491 | 1 | 0 | 1 | 0 |
| Case 88 | 13 | 101,141,871 | 101,562,506 | 1 | 1 | 2 | 0 |
| Case 88 | 13 | 101,562,964 | 103,203,024 | 2 | 1 | 3 | 0 |
| Case 88 | 13 | 103,203,070 | 103,715,022 | 2 | 0 | 2 | 1 |
| Case 88 | 13 | 103,715,046 | 108,085,618 | 2 | 1 | 3 | 0 |
| Case 88 | 13 | 108,087,499 | 108,470,487 | 2 | 0 | 2 | 1 |
| Case 88 | 13 | 108,470,537 | 114,930,355 | 2 | 1 | 3 | 0 |
| Case 88 | 13 | 114,930,955 | 115,103,529 | 3 | 1 | 4 | 0 |
| Case 88 | 14 | 19,280,733  | 20,444,162  | 3 | 0 | 3 | 1 |
| Case 88 | 14 | 20,444,182  | 20,692,574  | 1 | 1 | 2 | 0 |
| Case 88 | 14 | 20,692,595  | 21,458,649  | 1 | 0 | 1 | 0 |
| Case 88 | 14 | 21,458,668  | 21,575,963  | 1 | 1 | 2 | 0 |
| Case 88 | 14 | 21,577,837  | 22,102,800  | 1 | 0 | 1 | 0 |
| Case 88 | 14 | 22,102,871  | 22,380,824  | 1 | 1 | 2 | 0 |
| Case 88 | 14 | 22,381,668  | 22,979,348  | 2 | 1 | 3 | 0 |
| Case 88 | 14 | 22,980,408  | 23,079,840  | 1 | 1 | 2 | 0 |
| Case 88 | 14 | 23,080,679  | 23,511,502  | 1 | 0 | 1 | 0 |
| Case 88 | 14 | 23,511,538  | 31,068,090  | 1 | 1 | 2 | 0 |
| Case 88 | 14 | 31,069,354  | 32,282,564  | 1 | 0 | 1 | 0 |
| Case 88 | 14 | 32,294,740  | 33,875,672  | 1 | 1 | 2 | 0 |
| Case 88 | 14 | 33,875,903  | 34,170,982  | 2 | 1 | 3 | 0 |
| Case 88 | 14 | 34,172,003  | 34,801,463  | 1 | 1 | 2 | 0 |
| Case 88 | 14 | 34,801,696  | 35,675,238  | 0 | 0 | 0 | 0 |
| Case 88 | 14 | 35,682,172  | 35,716,132  | 2 | 0 | 2 | 1 |
| Case 88 | 14 | 35,717,282  | 36,479,827  | 1 | 0 | 1 | 0 |

|         |    |             |             |   |   |   |   |
|---------|----|-------------|-------------|---|---|---|---|
| Case 88 | 14 | 36,481,782  | 39,346,879  | 1 | 1 | 2 | 0 |
| Case 88 | 14 | 39,348,403  | 40,027,457  | 1 | 0 | 1 | 0 |
| Case 88 | 14 | 40,032,019  | 44,814,353  | 1 | 1 | 2 | 0 |
| Case 88 | 14 | 44,815,987  | 46,361,344  | 1 | 0 | 1 | 0 |
| Case 88 | 14 | 46,367,455  | 49,948,307  | 1 | 1 | 2 | 0 |
| Case 88 | 14 | 49,951,350  | 51,615,152  | 1 | 0 | 1 | 0 |
| Case 88 | 14 | 51,635,272  | 52,756,594  | 1 | 1 | 2 | 0 |
| Case 88 | 14 | 52,761,693  | 53,562,620  | 1 | 0 | 1 | 0 |
| Case 88 | 14 | 53,570,437  | 55,306,240  | 1 | 1 | 2 | 0 |
| Case 88 | 14 | 55,306,804  | 56,081,129  | 1 | 0 | 1 | 0 |
| Case 88 | 14 | 56,081,149  | 58,606,016  | 1 | 1 | 2 | 0 |
| Case 88 | 14 | 58,606,251  | 59,111,988  | 1 | 0 | 1 | 0 |
| Case 88 | 14 | 59,112,221  | 61,005,625  | 1 | 1 | 2 | 0 |
| Case 88 | 14 | 61,015,153  | 61,717,064  | 1 | 0 | 1 | 0 |
| Case 88 | 14 | 61,724,753  | 63,177,144  | 1 | 1 | 2 | 0 |
| Case 88 | 14 | 63,177,577  | 65,049,394  | 1 | 0 | 1 | 0 |
| Case 88 | 14 | 65,053,997  | 65,530,916  | 1 | 1 | 2 | 0 |
| Case 88 | 14 | 65,534,084  | 66,052,713  | 1 | 0 | 1 | 0 |
| Case 88 | 14 | 66,055,943  | 66,983,034  | 1 | 1 | 2 | 0 |
| Case 88 | 14 | 67,005,434  | 68,600,494  | 1 | 0 | 1 | 0 |
| Case 88 | 14 | 68,609,319  | 70,789,805  | 1 | 1 | 2 | 0 |
| Case 88 | 14 | 70,791,493  | 71,511,602  | 1 | 0 | 1 | 0 |
| Case 88 | 14 | 71,514,668  | 73,459,917  | 1 | 1 | 2 | 0 |
| Case 88 | 14 | 73,459,927  | 74,759,301  | 1 | 0 | 1 | 0 |
| Case 88 | 14 | 74,759,919  | 75,434,102  | 1 | 1 | 2 | 0 |
| Case 88 | 14 | 75,443,103  | 76,011,326  | 1 | 0 | 1 | 0 |
| Case 88 | 14 | 76,015,954  | 77,819,247  | 1 | 1 | 2 | 0 |
| Case 88 | 14 | 77,829,167  | 78,370,925  | 1 | 0 | 1 | 0 |
| Case 88 | 14 | 78,371,389  | 89,783,562  | 1 | 1 | 2 | 0 |
| Case 88 | 14 | 89,788,367  | 90,754,006  | 1 | 0 | 1 | 0 |
| Case 88 | 14 | 90,754,538  | 91,248,030  | 1 | 1 | 2 | 0 |
| Case 88 | 14 | 91,252,559  | 92,677,528  | 1 | 0 | 1 | 0 |
| Case 88 | 14 | 92,680,083  | 93,621,420  | 1 | 1 | 2 | 0 |
| Case 88 | 14 | 93,629,959  | 94,041,411  | 1 | 0 | 1 | 0 |
| Case 88 | 14 | 94,041,488  | 102,384,258 | 1 | 1 | 2 | 0 |
| Case 88 | 14 | 102,385,457 | 103,263,788 | 1 | 0 | 1 | 0 |
| Case 88 | 14 | 103,265,666 | 103,696,504 | 1 | 1 | 2 | 0 |
| Case 88 | 14 | 103,697,633 | 104,169,623 | 1 | 0 | 1 | 0 |
| Case 88 | 14 | 104,169,659 | 104,559,926 | 1 | 1 | 2 | 0 |
| Case 88 | 14 | 104,561,886 | 107,287,663 | 2 | 1 | 3 | 0 |
| Case 88 | 15 | 20,034,919  | 22,652,330  | 2 | 0 | 2 | 1 |
| Case 88 | 15 | 22,750,305  | 25,333,590  | 1 | 0 | 1 | 0 |
| Case 88 | 15 | 25,334,086  | 32,404,084  | 1 | 1 | 2 | 0 |
| Case 88 | 15 | 32,408,231  | 33,118,446  | 1 | 0 | 1 | 0 |
| Case 88 | 15 | 33,124,275  | 33,388,684  | 1 | 1 | 2 | 0 |
| Case 88 | 15 | 33,390,667  | 33,685,830  | 1 | 0 | 1 | 0 |
| Case 88 | 15 | 33,685,845  | 34,134,195  | 1 | 1 | 2 | 0 |
| Case 88 | 15 | 34,134,386  | 34,671,124  | 1 | 0 | 1 | 0 |
| Case 88 | 15 | 34,718,594  | 35,064,331  | 1 | 1 | 2 | 0 |
| Case 88 | 15 | 35,065,284  | 35,951,109  | 2 | 0 | 2 | 1 |
| Case 88 | 15 | 35,951,422  | 40,395,403  | 2 | 1 | 3 | 0 |
| Case 88 | 15 | 40,396,444  | 40,898,141  | 2 | 0 | 2 | 1 |
| Case 88 | 15 | 40,898,604  | 41,819,716  | 1 | 0 | 1 | 0 |
| Case 88 | 15 | 41,819,719  | 42,688,772  | 1 | 1 | 2 | 0 |
| Case 88 | 15 | 42,688,993  | 43,489,544  | 1 | 0 | 1 | 0 |
| Case 88 | 15 | 43,489,611  | 44,087,935  | 1 | 1 | 2 | 0 |
| Case 88 | 15 | 44,088,374  | 45,312,309  | 1 | 0 | 1 | 0 |
| Case 88 | 15 | 45,314,764  | 45,584,438  | 1 | 1 | 2 | 0 |
| Case 88 | 15 | 45,599,370  | 46,181,244  | 1 | 0 | 1 | 0 |
| Case 88 | 15 | 46,195,108  | 49,085,583  | 2 | 1 | 3 | 0 |
| Case 88 | 15 | 49,088,213  | 49,686,417  | 1 | 1 | 2 | 0 |

|         |    |             |             |   |   |   |   |
|---------|----|-------------|-------------|---|---|---|---|
| Case 88 | 15 | 49,699,463  | 49,882,131  | 2 | 1 | 3 | 0 |
| Case 88 | 15 | 49,906,370  | 50,275,011  | 3 | 1 | 4 | 0 |
| Case 88 | 15 | 50,275,056  | 51,304,373  | 2 | 0 | 2 | 1 |
| Case 88 | 15 | 51,335,363  | 52,007,217  | 3 | 1 | 4 | 0 |
| Case 88 | 15 | 52,007,522  | 52,983,294  | 2 | 1 | 3 | 0 |
| Case 88 | 15 | 52,985,280  | 54,177,677  | 3 | 1 | 4 | 0 |
| Case 88 | 15 | 54,177,689  | 55,386,743  | 2 | 1 | 3 | 0 |
| Case 88 | 15 | 55,393,183  | 57,620,958  | 1 | 1 | 2 | 0 |
| Case 88 | 15 | 57,622,600  | 57,816,946  | 2 | 0 | 2 | 1 |
| Case 88 | 15 | 57,817,050  | 58,253,106  | 2 | 1 | 3 | 0 |
| Case 88 | 15 | 58,253,231  | 58,357,800  | 3 | 1 | 4 | 0 |
| Case 88 | 15 | 58,371,682  | 59,084,268  | 2 | 0 | 2 | 1 |
| Case 88 | 15 | 59,086,703  | 59,486,640  | 1 | 0 | 1 | 0 |
| Case 88 | 15 | 59,487,386  | 60,917,275  | 2 | 0 | 2 | 1 |
| Case 88 | 15 | 60,918,417  | 62,269,312  | 2 | 1 | 3 | 0 |
| Case 88 | 15 | 62,269,392  | 62,877,406  | 2 | 0 | 2 | 1 |
| Case 88 | 15 | 62,885,173  | 63,322,026  | 2 | 1 | 3 | 0 |
| Case 88 | 15 | 63,323,779  | 64,078,438  | 2 | 0 | 2 | 1 |
| Case 88 | 15 | 64,091,049  | 65,487,209  | 1 | 0 | 1 | 0 |
| Case 88 | 15 | 65,488,409  | 66,305,532  | 2 | 0 | 2 | 1 |
| Case 88 | 15 | 66,311,508  | 67,021,996  | 3 | 0 | 3 | 1 |
| Case 88 | 15 | 67,030,031  | 68,500,645  | 2 | 0 | 2 | 1 |
| Case 88 | 15 | 68,500,660  | 68,758,506  | 3 | 0 | 3 | 1 |
| Case 88 | 15 | 68,759,467  | 70,054,103  | 2 | 0 | 2 | 1 |
| Case 88 | 15 | 70,055,377  | 70,957,107  | 3 | 0 | 3 | 1 |
| Case 88 | 15 | 70,957,117  | 74,176,910  | 2 | 0 | 2 | 1 |
| Case 88 | 15 | 74,177,197  | 74,751,139  | 3 | 0 | 3 | 1 |
| Case 88 | 15 | 74,770,334  | 77,928,379  | 2 | 0 | 2 | 1 |
| Case 88 | 15 | 77,932,438  | 78,311,343  | 3 | 0 | 3 | 1 |
| Case 88 | 15 | 78,315,497  | 79,235,446  | 2 | 0 | 2 | 1 |
| Case 88 | 15 | 79,237,247  | 79,812,794  | 3 | 0 | 3 | 1 |
| Case 88 | 15 | 79,814,087  | 102,264,535 | 2 | 0 | 2 | 1 |
| Case 88 | 15 | 102,267,222 | 102,461,162 | 3 | 0 | 3 | 1 |
| Case 88 | 16 | 88,165      | 216,636     | 4 | 2 | 6 | 0 |
| Case 88 | 16 | 221,057     | 225,653     | 1 | 1 | 2 | 0 |
| Case 88 | 16 | 230,538     | 460,673     | 2 | 1 | 3 | 0 |
| Case 88 | 16 | 460,981     | 553,035     | 1 | 1 | 2 | 0 |
| Case 88 | 16 | 555,578     | 1,470,068   | 2 | 2 | 4 | 0 |
| Case 88 | 16 | 1,470,206   | 3,165,845   | 2 | 1 | 3 | 0 |
| Case 88 | 16 | 3,165,900   | 4,758,465   | 1 | 1 | 2 | 0 |
| Case 88 | 16 | 4,764,061   | 5,112,563   | 2 | 1 | 3 | 0 |
| Case 88 | 16 | 5,115,228   | 10,427,647  | 1 | 1 | 2 | 0 |
| Case 88 | 16 | 10,428,747  | 10,626,763  | 1 | 0 | 1 | 0 |
| Case 88 | 16 | 10,626,769  | 25,843,481  | 1 | 1 | 2 | 0 |
| Case 88 | 16 | 25,848,806  | 28,167,623  | 2 | 0 | 2 | 1 |
| Case 88 | 16 | 28,181,093  | 28,601,802  | 1 | 0 | 1 | 0 |
| Case 88 | 16 | 28,602,991  | 33,918,288  | 1 | 1 | 2 | 0 |
| Case 88 | 16 | 34,004,547  | 35,285,582  | 1 | 0 | 1 | 0 |
| Case 88 | 16 | 46,450,037  | 47,699,855  | 1 | 0 | 1 | 0 |
| Case 88 | 16 | 47,703,157  | 50,030,320  | 1 | 1 | 2 | 0 |
| Case 88 | 16 | 50,038,302  | 50,281,671  | 1 | 0 | 1 | 0 |
| Case 88 | 16 | 50,292,343  | 52,777,252  | 1 | 1 | 2 | 0 |
| Case 88 | 16 | 52,777,446  | 53,858,954  | 1 | 0 | 1 | 0 |
| Case 88 | 16 | 53,859,158  | 58,161,514  | 1 | 1 | 2 | 0 |
| Case 88 | 16 | 58,163,096  | 59,241,430  | 1 | 0 | 1 | 0 |
| Case 88 | 16 | 59,247,683  | 66,600,673  | 1 | 1 | 2 | 0 |
| Case 88 | 16 | 66,606,901  | 66,915,446  | 1 | 0 | 1 | 0 |
| Case 88 | 16 | 66,918,260  | 67,006,899  | 1 | 1 | 2 | 0 |
| Case 88 | 16 | 67,007,914  | 70,833,405  | 1 | 0 | 1 | 0 |
| Case 88 | 16 | 70,841,632  | 71,408,287  | 1 | 1 | 2 | 0 |
| Case 88 | 16 | 71,408,475  | 72,094,308  | 1 | 0 | 1 | 0 |

|         |    |            |            |   |   |   |   |
|---------|----|------------|------------|---|---|---|---|
| Case 88 | 16 | 72,094,348 | 73,847,806 | 1 | 1 | 2 | 0 |
| Case 88 | 16 | 73,848,433 | 76,314,954 | 1 | 0 | 1 | 0 |
| Case 88 | 16 | 76,320,905 | 77,132,965 | 1 | 1 | 2 | 0 |
| Case 88 | 16 | 77,134,281 | 78,970,051 | 1 | 0 | 1 | 0 |
| Case 88 | 16 | 78,970,114 | 80,780,367 | 1 | 1 | 2 | 0 |
| Case 88 | 16 | 80,785,448 | 81,863,593 | 1 | 0 | 1 | 0 |
| Case 88 | 16 | 81,865,235 | 88,871,230 | 1 | 1 | 2 | 0 |
| Case 88 | 16 | 88,871,873 | 89,293,891 | 2 | 1 | 3 | 0 |
| Case 88 | 16 | 89,293,949 | 89,986,025 | 1 | 1 | 2 | 0 |
| Case 88 | 16 | 89,986,030 | 90,274,695 | 2 | 1 | 3 | 0 |
| Case 88 | 17 | 11,885     | 128,389    | 3 | 1 | 4 | 0 |
| Case 88 | 17 | 129,225    | 9,274,797  | 2 | 0 | 2 | 1 |
| Case 88 | 17 | 9,300,195  | 9,613,339  | 1 | 0 | 1 | 0 |
| Case 88 | 17 | 9,613,717  | 12,761,374 | 2 | 0 | 2 | 1 |
| Case 88 | 17 | 12,761,448 | 13,831,105 | 1 | 0 | 1 | 0 |
| Case 88 | 17 | 13,832,462 | 19,480,808 | 2 | 0 | 2 | 1 |
| Case 88 | 17 | 19,484,951 | 22,242,355 | 1 | 0 | 1 | 0 |
| Case 88 | 17 | 25,268,142 | 25,702,787 | 1 | 0 | 1 | 0 |
| Case 88 | 17 | 25,712,690 | 27,448,035 | 1 | 1 | 2 | 0 |
| Case 88 | 17 | 27,448,045 | 31,094,760 | 1 | 0 | 1 | 0 |
| Case 88 | 17 | 31,099,821 | 34,340,347 | 1 | 1 | 2 | 0 |
| Case 88 | 17 | 34,340,860 | 34,431,342 | 2 | 0 | 2 | 1 |
| Case 88 | 17 | 34,431,360 | 34,436,708 | 3 | 0 | 3 | 1 |
| Case 88 | 17 | 34,443,811 | 34,476,396 | 6 | 1 | 7 | 0 |
| Case 88 | 17 | 34,597,521 | 34,815,551 | 3 | 0 | 3 | 1 |
| Case 88 | 17 | 34,819,191 | 35,483,943 | 2 | 0 | 2 | 1 |
| Case 88 | 17 | 35,488,423 | 36,478,028 | 1 | 0 | 1 | 0 |
| Case 88 | 17 | 36,478,144 | 37,032,301 | 1 | 1 | 2 | 0 |
| Case 88 | 17 | 37,035,312 | 37,682,393 | 1 | 0 | 1 | 0 |
| Case 88 | 17 | 37,682,533 | 39,463,103 | 2 | 0 | 2 | 1 |
| Case 88 | 17 | 39,464,046 | 39,681,522 | 3 | 0 | 3 | 1 |
| Case 88 | 17 | 39,686,057 | 41,063,312 | 2 | 0 | 2 | 1 |
| Case 88 | 17 | 41,063,361 | 41,570,078 | 1 | 0 | 1 | 0 |
| Case 88 | 17 | 41,570,144 | 42,932,244 | 2 | 0 | 2 | 1 |
| Case 88 | 17 | 42,934,505 | 43,520,398 | 1 | 1 | 2 | 0 |
| Case 88 | 17 | 43,539,411 | 47,900,880 | 2 | 0 | 2 | 1 |
| Case 88 | 17 | 47,902,078 | 48,775,776 | 2 | 1 | 3 | 0 |
| Case 88 | 17 | 48,776,874 | 49,552,676 | 2 | 0 | 2 | 1 |
| Case 88 | 17 | 49,564,505 | 50,715,795 | 3 | 1 | 4 | 0 |
| Case 88 | 17 | 50,740,695 | 53,649,475 | 3 | 0 | 3 | 1 |
| Case 88 | 17 | 53,649,729 | 53,900,140 | 2 | 0 | 2 | 1 |
| Case 88 | 17 | 53,903,361 | 54,773,951 | 2 | 1 | 3 | 0 |
| Case 88 | 17 | 54,776,682 | 55,356,341 | 1 | 1 | 2 | 0 |
| Case 88 | 17 | 55,358,820 | 56,517,962 | 2 | 1 | 3 | 0 |
| Case 88 | 17 | 56,536,257 | 56,621,286 | 1 | 1 | 2 | 0 |
| Case 88 | 17 | 56,621,519 | 59,369,452 | 1 | 0 | 1 | 0 |
| Case 88 | 17 | 59,372,034 | 59,675,381 | 1 | 1 | 2 | 0 |
| Case 88 | 17 | 59,676,854 | 60,720,362 | 0 | 0 | 0 | 0 |
| Case 88 | 17 | 60,737,092 | 62,300,514 | 1 | 1 | 2 | 0 |
| Case 88 | 17 | 62,300,587 | 64,443,372 | 1 | 0 | 1 | 0 |
| Case 88 | 17 | 64,443,629 | 65,105,513 | 1 | 1 | 2 | 0 |
| Case 88 | 17 | 65,105,604 | 66,494,657 | 1 | 0 | 1 | 0 |
| Case 88 | 17 | 66,505,856 | 67,226,643 | 1 | 1 | 2 | 0 |
| Case 88 | 17 | 67,235,705 | 68,102,331 | 1 | 0 | 1 | 0 |
| Case 88 | 17 | 68,102,616 | 74,993,606 | 1 | 1 | 2 | 0 |
| Case 88 | 17 | 74,995,894 | 75,181,098 | 1 | 0 | 1 | 0 |
| Case 88 | 17 | 75,183,122 | 77,073,901 | 1 | 1 | 2 | 0 |
| Case 88 | 17 | 77,075,625 | 77,873,520 | 2 | 1 | 3 | 0 |
| Case 88 | 17 | 77,876,362 | 79,021,058 | 1 | 1 | 2 | 0 |
| Case 88 | 17 | 79,023,380 | 80,050,654 | 2 | 1 | 3 | 0 |
| Case 88 | 17 | 80,051,546 | 80,615,643 | 1 | 1 | 2 | 0 |

|         |    |            |            |   |   |   |   |
|---------|----|------------|------------|---|---|---|---|
| Case 88 | 17 | 80,615,788 | 81,060,040 | 2 | 1 | 3 | 0 |
| Case 88 | 18 | 87,505     | 457,853    | 2 | 1 | 3 | 0 |
| Case 88 | 18 | 458,383    | 497,729    | 1 | 1 | 2 | 0 |
| Case 88 | 18 | 503,177    | 843,971    | 1 | 0 | 1 | 0 |
| Case 88 | 18 | 844,449    | 2,404,134  | 2 | 1 | 3 | 0 |
| Case 88 | 18 | 2,406,195  | 3,339,405  | 1 | 1 | 2 | 0 |
| Case 88 | 18 | 3,340,817  | 3,748,024  | 1 | 0 | 1 | 0 |
| Case 88 | 18 | 3,748,286  | 9,255,718  | 2 | 1 | 3 | 0 |
| Case 88 | 18 | 9,255,784  | 9,748,110  | 2 | 0 | 2 | 1 |
| Case 88 | 18 | 9,749,879  | 11,775,386 | 2 | 1 | 3 | 0 |
| Case 88 | 18 | 11,775,522 | 13,157,966 | 1 | 1 | 2 | 0 |
| Case 88 | 18 | 13,163,903 | 15,082,789 | 2 | 1 | 3 | 0 |
| Case 88 | 18 | 15,102,421 | 15,375,878 | 2 | 0 | 2 | 1 |
| Case 88 | 18 | 18,520,354 | 19,789,487 | 2 | 0 | 2 | 1 |
| Case 88 | 18 | 19,790,078 | 21,636,484 | 2 | 1 | 3 | 0 |
| Case 88 | 18 | 21,640,817 | 21,640,817 | 2 | 0 | 2 | 1 |
| Case 88 | 18 | 21,643,443 | 22,064,012 | 1 | 1 | 2 | 0 |
| Case 88 | 18 | 22,064,294 | 29,407,246 | 2 | 1 | 3 | 0 |
| Case 88 | 18 | 29,409,319 | 29,679,922 | 1 | 0 | 1 | 0 |
| Case 88 | 18 | 29,685,883 | 29,969,986 | 1 | 1 | 2 | 0 |
| Case 88 | 18 | 29,970,570 | 38,478,646 | 2 | 1 | 3 | 0 |
| Case 88 | 18 | 38,479,732 | 43,505,720 | 3 | 1 | 4 | 0 |
| Case 88 | 18 | 43,508,800 | 43,590,067 | 2 | 0 | 2 | 1 |
| Case 88 | 18 | 43,590,990 | 43,669,677 | 1 | 0 | 1 | 0 |
| Case 88 | 18 | 43,669,679 | 43,669,856 | 2 | 0 | 2 | 1 |
| Case 88 | 18 | 43,671,709 | 43,880,955 | 1 | 1 | 2 | 0 |
| Case 88 | 18 | 43,883,487 | 46,419,946 | 2 | 1 | 3 | 0 |
| Case 88 | 18 | 46,423,345 | 47,329,070 | 1 | 1 | 2 | 0 |
| Case 88 | 18 | 47,329,071 | 47,566,656 | 2 | 1 | 3 | 0 |
| Case 88 | 18 | 47,566,678 | 49,014,615 | 1 | 1 | 2 | 0 |
| Case 88 | 18 | 49,015,440 | 50,692,978 | 2 | 1 | 3 | 0 |
| Case 88 | 18 | 50,694,304 | 52,752,017 | 1 | 1 | 2 | 0 |
| Case 88 | 18 | 52,756,171 | 54,949,387 | 2 | 1 | 3 | 0 |
| Case 88 | 18 | 54,950,575 | 63,716,832 | 1 | 1 | 2 | 0 |
| Case 88 | 18 | 63,719,407 | 64,308,198 | 2 | 1 | 3 | 0 |
| Case 88 | 18 | 64,316,535 | 65,378,004 | 1 | 1 | 2 | 0 |
| Case 88 | 18 | 65,378,287 | 65,933,548 | 2 | 1 | 3 | 0 |
| Case 88 | 18 | 65,934,092 | 72,250,823 | 1 | 1 | 2 | 0 |
| Case 88 | 18 | 72,250,883 | 74,178,139 | 2 | 1 | 3 | 0 |
| Case 88 | 18 | 74,180,990 | 75,780,436 | 1 | 1 | 2 | 0 |
| Case 88 | 18 | 75,780,603 | 76,021,488 | 2 | 2 | 4 | 0 |
| Case 88 | 18 | 76,021,556 | 77,770,322 | 1 | 1 | 2 | 0 |
| Case 88 | 18 | 77,787,419 | 78,015,180 | 2 | 2 | 4 | 0 |
| Case 88 | 19 | 260,912    | 316,040    | 3 | 1 | 4 | 0 |
| Case 88 | 19 | 318,308    | 958,495    | 2 | 0 | 2 | 1 |
| Case 88 | 19 | 960,445    | 1,005,173  | 2 | 1 | 3 | 0 |
| Case 88 | 19 | 1,005,224  | 1,049,396  | 3 | 1 | 4 | 0 |
| Case 88 | 19 | 1,050,996  | 6,534,761  | 2 | 0 | 2 | 1 |
| Case 88 | 19 | 6,534,841  | 6,658,613  | 1 | 0 | 1 | 0 |
| Case 88 | 19 | 6,658,636  | 6,782,574  | 2 | 0 | 2 | 1 |
| Case 88 | 19 | 6,786,271  | 7,261,441  | 1 | 0 | 1 | 0 |
| Case 88 | 19 | 7,266,944  | 8,633,943  | 2 | 0 | 2 | 1 |
| Case 88 | 19 | 8,634,766  | 9,049,725  | 1 | 0 | 1 | 0 |
| Case 88 | 19 | 9,049,745  | 9,096,304  | 2 | 0 | 2 | 1 |
| Case 88 | 19 | 9,101,672  | 9,380,978  | 1 | 0 | 1 | 0 |
| Case 88 | 19 | 9,395,584  | 9,395,584  | 2 | 0 | 2 | 1 |
| Case 88 | 19 | 9,401,159  | 9,932,831  | 0 | 0 | 0 | 0 |
| Case 88 | 19 | 9,939,092  | 10,624,525 | 2 | 0 | 2 | 1 |
| Case 88 | 19 | 10,624,735 | 11,730,545 | 1 | 1 | 2 | 0 |
| Case 88 | 19 | 11,735,558 | 12,692,001 | 0 | 0 | 0 | 0 |
| Case 88 | 19 | 12,692,033 | 18,242,604 | 1 | 1 | 2 | 0 |

|         |    |            |            |   |   |   |   |
|---------|----|------------|------------|---|---|---|---|
| Case 88 | 19 | 18,245,512 | 19,740,804 | 2 | 1 | 3 | 0 |
| Case 88 | 19 | 19,740,906 | 19,770,777 | 1 | 1 | 2 | 0 |
| Case 88 | 19 | 19,770,790 | 24,217,064 | 1 | 0 | 1 | 0 |
| Case 88 | 19 | 24,222,489 | 24,629,285 | 0 | 0 | 0 | 0 |
| Case 88 | 19 | 27,732,159 | 28,095,812 | 0 | 0 | 0 | 0 |
| Case 88 | 19 | 28,101,122 | 31,026,543 | 2 | 0 | 2 | 1 |
| Case 88 | 19 | 31,026,875 | 31,924,649 | 3 | 0 | 3 | 1 |
| Case 88 | 19 | 31,925,003 | 32,845,370 | 2 | 0 | 2 | 1 |
| Case 88 | 19 | 32,845,598 | 33,696,362 | 1 | 0 | 1 | 0 |
| Case 88 | 19 | 33,696,830 | 34,407,747 | 2 | 0 | 2 | 1 |
| Case 88 | 19 | 34,411,472 | 35,069,082 | 1 | 0 | 1 | 0 |
| Case 88 | 19 | 35,075,482 | 36,674,305 | 2 | 0 | 2 | 1 |
| Case 88 | 19 | 36,674,347 | 37,383,100 | 0 | 0 | 0 | 0 |
| Case 88 | 19 | 37,383,253 | 37,397,301 | 2 | 0 | 2 | 1 |
| Case 88 | 19 | 37,399,350 | 38,024,271 | 1 | 0 | 1 | 0 |
| Case 88 | 19 | 38,024,288 | 38,028,484 | 2 | 0 | 2 | 1 |
| Case 88 | 19 | 38,030,003 | 38,307,559 | 0 | 0 | 0 | 0 |
| Case 88 | 19 | 38,307,904 | 38,946,182 | 2 | 0 | 2 | 1 |
| Case 88 | 19 | 38,948,881 | 40,446,140 | 1 | 1 | 2 | 0 |
| Case 88 | 19 | 40,447,257 | 40,719,959 | 1 | 0 | 1 | 0 |
| Case 88 | 19 | 40,720,381 | 43,328,006 | 1 | 1 | 2 | 0 |
| Case 88 | 19 | 43,344,686 | 43,539,189 | 0 | 0 | 0 | 0 |
| Case 88 | 19 | 43,556,843 | 43,559,330 | 2 | 0 | 2 | 1 |
| Case 88 | 19 | 43,575,187 | 43,866,823 | 2 | 2 | 4 | 0 |
| Case 88 | 19 | 43,870,887 | 44,117,166 | 1 | 1 | 2 | 0 |
| Case 88 | 19 | 44,117,769 | 44,795,565 | 2 | 0 | 2 | 1 |
| Case 88 | 19 | 44,803,508 | 46,716,716 | 2 | 1 | 3 | 0 |
| Case 88 | 19 | 46,719,646 | 46,953,488 | 1 | 1 | 2 | 0 |
| Case 88 | 19 | 46,954,262 | 47,288,150 | 2 | 1 | 3 | 0 |
| Case 88 | 19 | 47,290,930 | 47,823,871 | 2 | 0 | 2 | 1 |
| Case 88 | 19 | 47,823,934 | 48,848,506 | 1 | 1 | 2 | 0 |
| Case 88 | 19 | 48,848,554 | 49,183,284 | 2 | 1 | 3 | 0 |
| Case 88 | 19 | 49,184,380 | 49,206,658 | 1 | 0 | 1 | 0 |
| Case 88 | 19 | 49,206,726 | 52,240,318 | 2 | 1 | 3 | 0 |
| Case 88 | 19 | 52,240,842 | 52,439,298 | 1 | 1 | 2 | 0 |
| Case 88 | 19 | 52,442,262 | 53,521,083 | 1 | 0 | 1 | 0 |
| Case 88 | 19 | 53,522,100 | 53,554,075 | 5 | 0 | 5 | 1 |
| Case 88 | 19 | 53,554,240 | 53,565,122 | 1 | 1 | 2 | 0 |
| Case 88 | 19 | 53,566,629 | 53,747,000 | 1 | 0 | 1 | 0 |
| Case 88 | 19 | 53,747,024 | 53,911,553 | 2 | 0 | 2 | 1 |
| Case 88 | 19 | 53,911,580 | 54,304,545 | 1 | 0 | 1 | 0 |
| Case 88 | 19 | 54,304,571 | 54,519,954 | 2 | 0 | 2 | 1 |
| Case 88 | 19 | 54,526,972 | 56,549,510 | 2 | 1 | 3 | 0 |
| Case 88 | 19 | 56,549,532 | 57,139,555 | 1 | 1 | 2 | 0 |
| Case 88 | 19 | 57,145,434 | 57,379,704 | 2 | 1 | 3 | 0 |
| Case 88 | 19 | 57,392,229 | 57,569,912 | 1 | 0 | 1 | 0 |
| Case 88 | 19 | 57,572,325 | 58,212,044 | 1 | 1 | 2 | 0 |
| Case 88 | 19 | 58,213,007 | 58,491,461 | 1 | 0 | 1 | 0 |
| Case 88 | 19 | 58,491,627 | 58,773,939 | 1 | 1 | 2 | 0 |
| Case 88 | 19 | 58,774,064 | 58,967,858 | 2 | 1 | 3 | 0 |
| Case 88 | 19 | 58,967,878 | 59,097,160 | 3 | 3 | 6 | 0 |
| Case 88 | 20 | 63,244     | 169,701    | 2 | 1 | 3 | 0 |
| Case 88 | 20 | 169,995    | 5,485,097  | 1 | 1 | 2 | 0 |
| Case 88 | 20 | 5,487,848  | 6,021,768  | 1 | 0 | 1 | 0 |
| Case 88 | 20 | 6,021,877  | 22,746,685 | 1 | 1 | 2 | 0 |
| Case 88 | 20 | 22,749,430 | 23,016,854 | 2 | 2 | 4 | 0 |
| Case 88 | 20 | 23,016,931 | 26,293,985 | 1 | 1 | 2 | 0 |
| Case 88 | 20 | 29,425,357 | 34,242,725 | 1 | 1 | 2 | 0 |
| Case 88 | 20 | 34,242,737 | 34,556,216 | 1 | 0 | 1 | 0 |
| Case 88 | 20 | 34,556,714 | 35,240,557 | 1 | 1 | 2 | 0 |
| Case 88 | 20 | 35,240,852 | 35,740,794 | 1 | 0 | 1 | 0 |

|         |    |            |            |   |   |   |   |
|---------|----|------------|------------|---|---|---|---|
| Case 88 | 20 | 35,742,471 | 36,330,118 | 1 | 1 | 2 | 0 |
| Case 88 | 20 | 36,342,678 | 36,919,616 | 2 | 1 | 3 | 0 |
| Case 88 | 20 | 36,920,753 | 37,576,160 | 1 | 1 | 2 | 0 |
| Case 88 | 20 | 37,580,316 | 41,981,566 | 2 | 1 | 3 | 0 |
| Case 88 | 20 | 41,981,702 | 44,591,324 | 1 | 1 | 2 | 0 |
| Case 88 | 20 | 44,592,227 | 45,227,523 | 2 | 1 | 3 | 0 |
| Case 88 | 20 | 45,228,584 | 46,695,252 | 1 | 1 | 2 | 0 |
| Case 88 | 20 | 46,700,159 | 47,394,490 | 2 | 1 | 3 | 0 |
| Case 88 | 20 | 47,394,788 | 50,469,544 | 1 | 1 | 2 | 0 |
| Case 88 | 20 | 50,473,244 | 50,706,403 | 1 | 0 | 1 | 0 |
| Case 88 | 20 | 50,710,691 | 55,597,892 | 1 | 1 | 2 | 0 |
| Case 88 | 20 | 55,598,400 | 58,010,129 | 2 | 1 | 3 | 0 |
| Case 88 | 20 | 58,011,875 | 58,210,005 | 1 | 1 | 2 | 0 |
| Case 88 | 20 | 58,211,295 | 58,854,231 | 2 | 2 | 4 | 0 |
| Case 88 | 20 | 58,856,822 | 59,134,718 | 1 | 1 | 2 | 0 |
| Case 88 | 20 | 59,142,286 | 62,192,982 | 2 | 2 | 4 | 0 |
| Case 88 | 20 | 62,193,253 | 62,227,062 | 3 | 1 | 4 | 0 |
| Case 88 | 20 | 62,227,081 | 62,697,000 | 2 | 1 | 3 | 0 |
| Case 88 | 20 | 62,698,484 | 62,948,788 | 3 | 1 | 4 | 0 |
| Case 88 | 21 | 10,827,533 | 10,971,337 | 1 | 0 | 1 | 0 |
| Case 88 | 21 | 14,368,320 | 16,298,857 | 1 | 0 | 1 | 0 |
| Case 88 | 21 | 16,315,838 | 17,250,696 | 1 | 1 | 2 | 0 |
| Case 88 | 21 | 17,275,170 | 19,437,980 | 1 | 0 | 1 | 0 |
| Case 88 | 21 | 19,438,152 | 20,020,025 | 1 | 1 | 2 | 0 |
| Case 88 | 21 | 20,028,118 | 23,235,604 | 1 | 0 | 1 | 0 |
| Case 88 | 21 | 23,235,818 | 27,476,104 | 1 | 1 | 2 | 0 |
| Case 88 | 21 | 27,481,343 | 27,724,640 | 1 | 0 | 1 | 0 |
| Case 88 | 21 | 27,725,900 | 32,682,873 | 1 | 1 | 2 | 0 |
| Case 88 | 21 | 32,688,912 | 32,954,765 | 1 | 0 | 1 | 0 |
| Case 88 | 21 | 32,957,311 | 34,575,898 | 1 | 1 | 2 | 0 |
| Case 88 | 21 | 34,576,385 | 35,199,880 | 1 | 0 | 1 | 0 |
| Case 88 | 21 | 35,200,374 | 37,510,186 | 1 | 1 | 2 | 0 |
| Case 88 | 21 | 37,510,224 | 37,807,318 | 1 | 0 | 1 | 0 |
| Case 88 | 21 | 37,809,408 | 43,136,639 | 1 | 1 | 2 | 0 |
| Case 88 | 21 | 43,138,836 | 43,740,749 | 2 | 1 | 3 | 0 |
| Case 88 | 21 | 43,741,597 | 43,816,548 | 1 | 1 | 2 | 0 |
| Case 88 | 21 | 43,822,402 | 44,117,586 | 2 | 2 | 4 | 0 |
| Case 88 | 21 | 44,117,997 | 44,837,359 | 1 | 1 | 2 | 0 |
| Case 88 | 21 | 44,837,555 | 47,557,244 | 2 | 1 | 3 | 0 |
| Case 88 | 21 | 47,558,501 | 47,904,585 | 1 | 1 | 2 | 0 |
| Case 88 | 21 | 47,905,496 | 48,100,155 | 2 | 2 | 4 | 0 |
| Case 88 | 22 | 16,114,244 | 17,829,955 | 1 | 1 | 2 | 0 |
| Case 88 | 22 | 17,831,441 | 18,229,187 | 1 | 0 | 1 | 0 |
| Case 88 | 22 | 18,234,535 | 19,717,320 | 1 | 1 | 2 | 0 |
| Case 88 | 22 | 19,717,620 | 20,260,814 | 2 | 1 | 3 | 0 |
| Case 88 | 22 | 20,278,004 | 25,099,115 | 1 | 1 | 2 | 0 |
| Case 88 | 22 | 25,103,024 | 25,300,658 | 1 | 0 | 1 | 0 |
| Case 88 | 22 | 25,301,142 | 28,643,360 | 1 | 1 | 2 | 0 |
| Case 88 | 22 | 28,643,510 | 29,533,165 | 1 | 0 | 1 | 0 |
| Case 88 | 22 | 29,533,437 | 31,739,222 | 1 | 1 | 2 | 0 |
| Case 88 | 22 | 31,740,564 | 32,764,881 | 1 | 0 | 1 | 0 |
| Case 88 | 22 | 32,766,528 | 33,469,031 | 1 | 1 | 2 | 0 |
| Case 88 | 22 | 33,469,284 | 34,514,810 | 1 | 0 | 1 | 0 |
| Case 88 | 22 | 34,516,294 | 37,257,855 | 1 | 1 | 2 | 0 |
| Case 88 | 22 | 37,258,503 | 37,873,012 | 2 | 1 | 3 | 0 |
| Case 88 | 22 | 37,875,492 | 38,468,617 | 1 | 1 | 2 | 0 |
| Case 88 | 22 | 38,471,068 | 43,527,681 | 1 | 0 | 1 | 0 |
| Case 88 | 22 | 43,528,218 | 45,258,333 | 2 | 0 | 2 | 1 |
| Case 88 | 22 | 45,258,344 | 45,413,112 | 1 | 1 | 2 | 0 |
| Case 88 | 22 | 45,415,412 | 45,914,595 | 1 | 0 | 1 | 0 |
| Case 88 | 22 | 45,916,679 | 46,667,037 | 2 | 0 | 2 | 1 |



|         |    |             |             |   |   |   |   |
|---------|----|-------------|-------------|---|---|---|---|
| Case 88 | 22 | 46,669,887  | 47,296,821  | 1 | 1 | 2 | 0 |
| Case 88 | 22 | 47,302,584  | 47,634,970  | 2 | 1 | 3 | 0 |
| Case 88 | 22 | 47,635,291  | 48,457,696  | 2 | 0 | 2 | 1 |
| Case 88 | 22 | 48,460,689  | 49,302,696  | 2 | 1 | 3 | 0 |
| Case 88 | 22 | 49,304,823  | 50,961,521  | 1 | 1 | 2 | 0 |
| Case 88 | 22 | 50,961,578  | 51,195,728  | 2 | 2 | 4 | 0 |
| Case 89 | 1  | 82,154      | 846,808     | 5 | 1 | 6 | 0 |
| Case 89 | 1  | 854,250     | 1,196,471   | 2 | 0 | 2 | 1 |
| Case 89 | 1  | 1,197,591   | 1,203,938   | 3 | 0 | 3 | 1 |
| Case 89 | 1  | 1,210,471   | 1,269,741   | 1 | 0 | 1 | 0 |
| Case 89 | 1  | 1,269,986   | 1,521,595   | 2 | 0 | 2 | 1 |
| Case 89 | 1  | 1,549,605   | 1,549,605   | 3 | 0 | 3 | 1 |
| Case 89 | 1  | 1,550,992   | 1,793,111   | 1 | 0 | 1 | 0 |
| Case 89 | 1  | 1,801,034   | 29,616,224  | 2 | 0 | 2 | 1 |
| Case 89 | 1  | 29,616,318  | 30,898,743  | 3 | 1 | 4 | 0 |
| Case 89 | 1  | 30,898,855  | 34,042,937  | 2 | 1 | 3 | 0 |
| Case 89 | 1  | 34,044,616  | 35,227,062  | 3 | 1 | 4 | 0 |
| Case 89 | 1  | 35,227,078  | 41,932,580  | 2 | 1 | 3 | 0 |
| Case 89 | 1  | 41,935,450  | 42,616,910  | 3 | 1 | 4 | 0 |
| Case 89 | 1  | 42,618,740  | 74,858,724  | 2 | 1 | 3 | 0 |
| Case 89 | 1  | 74,858,887  | 74,907,316  | 4 | 1 | 5 | 0 |
| Case 89 | 1  | 74,918,027  | 94,495,407  | 2 | 1 | 3 | 0 |
| Case 89 | 1  | 94,495,417  | 94,581,384  | 2 | 2 | 4 | 0 |
| Case 89 | 1  | 94,581,456  | 121,280,613 | 2 | 1 | 3 | 0 |
| Case 89 | 1  | 121,289,118 | 121,346,616 | 4 | 0 | 4 | 1 |
| Case 89 | 1  | 142,649,718 | 145,095,477 | 4 | 0 | 4 | 1 |
| Case 89 | 1  | 145,101,177 | 145,704,146 | 5 | 0 | 5 | 1 |
| Case 89 | 1  | 145,704,167 | 147,820,342 | 7 | 0 | 7 | 1 |
| Case 89 | 1  | 147,823,776 | 148,003,653 | 6 | 0 | 6 | 1 |
| Case 89 | 1  | 148,551,025 | 150,884,271 | 2 | 1 | 3 | 0 |
| Case 89 | 1  | 150,884,776 | 153,801,098 | 4 | 0 | 4 | 1 |
| Case 89 | 1  | 153,805,735 | 155,146,102 | 5 | 0 | 5 | 1 |
| Case 89 | 1  | 155,148,462 | 156,561,651 | 4 | 0 | 4 | 1 |
| Case 89 | 1  | 156,561,901 | 157,276,277 | 4 | 1 | 5 | 0 |
| Case 89 | 1  | 157,276,464 | 161,204,538 | 4 | 0 | 4 | 1 |
| Case 89 | 1  | 161,205,693 | 161,398,984 | 4 | 1 | 5 | 0 |
| Case 89 | 1  | 161,406,056 | 162,690,939 | 4 | 0 | 4 | 1 |
| Case 89 | 1  | 162,694,593 | 164,383,642 | 4 | 1 | 5 | 0 |
| Case 89 | 1  | 164,385,690 | 166,191,677 | 5 | 0 | 5 | 1 |
| Case 89 | 1  | 166,206,684 | 166,319,377 | 4 | 0 | 4 | 1 |
| Case 89 | 1  | 166,325,393 | 167,022,262 | 4 | 1 | 5 | 0 |
| Case 89 | 1  | 167,022,381 | 168,463,587 | 4 | 0 | 4 | 1 |
| Case 89 | 1  | 168,465,557 | 169,121,811 | 4 | 1 | 5 | 0 |
| Case 89 | 1  | 169,123,592 | 169,765,340 | 4 | 0 | 4 | 1 |
| Case 89 | 1  | 169,768,080 | 170,408,985 | 4 | 1 | 5 | 0 |
| Case 89 | 1  | 170,409,400 | 170,633,397 | 4 | 0 | 4 | 1 |
| Case 89 | 1  | 170,633,896 | 175,096,130 | 1 | 0 | 1 | 0 |
| Case 89 | 1  | 175,096,157 | 175,362,736 | 2 | 0 | 2 | 1 |
| Case 89 | 1  | 175,363,204 | 175,372,347 | 2 | 1 | 3 | 0 |
| Case 89 | 1  | 175,372,645 | 175,372,645 | 1 | 1 | 2 | 0 |
| Case 89 | 1  | 175,372,651 | 175,372,651 | 2 | 1 | 3 | 0 |
| Case 89 | 1  | 175,372,714 | 175,372,714 | 1 | 1 | 2 | 0 |
| Case 89 | 1  | 175,374,390 | 175,375,355 | 2 | 1 | 3 | 0 |
| Case 89 | 1  | 175,375,469 | 175,824,794 | 1 | 1 | 2 | 0 |
| Case 89 | 1  | 175,827,683 | 176,832,613 | 1 | 0 | 1 | 0 |
| Case 89 | 1  | 176,833,427 | 176,833,486 | 2 | 0 | 2 | 1 |
| Case 89 | 1  | 176,833,497 | 177,482,911 | 2 | 1 | 3 | 0 |
| Case 89 | 1  | 177,486,382 | 178,854,226 | 3 | 1 | 4 | 0 |
| Case 89 | 1  | 178,854,330 | 179,398,726 | 3 | 0 | 3 | 1 |
| Case 89 | 1  | 179,399,253 | 187,498,538 | 3 | 1 | 4 | 0 |
| Case 89 | 1  | 187,500,314 | 188,216,544 | 3 | 0 | 3 | 1 |

|         |   |             |             |   |   |   |   |
|---------|---|-------------|-------------|---|---|---|---|
| Case 89 | 1 | 188,216,715 | 193,895,333 | 3 | 1 | 4 | 0 |
| Case 89 | 1 | 193,896,826 | 195,044,251 | 3 | 0 | 3 | 1 |
| Case 89 | 1 | 195,050,507 | 241,611,462 | 3 | 1 | 4 | 0 |
| Case 89 | 1 | 241,615,673 | 241,822,182 | 1 | 0 | 1 | 0 |
| Case 89 | 1 | 241,823,862 | 246,568,701 | 3 | 1 | 4 | 0 |
| Case 89 | 1 | 246,575,604 | 248,411,889 | 3 | 0 | 3 | 1 |
| Case 89 | 1 | 248,415,662 | 249,218,992 | 3 | 1 | 4 | 0 |
| Case 89 | 2 | 18,674      | 3,763,411   | 2 | 1 | 3 | 0 |
| Case 89 | 2 | 3,764,796   | 4,148,784   | 2 | 2 | 4 | 0 |
| Case 89 | 2 | 4,150,984   | 4,652,506   | 2 | 1 | 3 | 0 |
| Case 89 | 2 | 4,653,262   | 51,576,612  | 2 | 2 | 4 | 0 |
| Case 89 | 2 | 51,581,853  | 85,502,264  | 2 | 1 | 3 | 0 |
| Case 89 | 2 | 85,502,419  | 85,824,592  | 3 | 1 | 4 | 0 |
| Case 89 | 2 | 85,826,132  | 92,081,640  | 2 | 1 | 3 | 0 |
| Case 89 | 2 | 95,429,424  | 134,529,356 | 2 | 1 | 3 | 0 |
| Case 89 | 2 | 134,531,412 | 134,845,085 | 3 | 1 | 4 | 0 |
| Case 89 | 2 | 134,848,764 | 169,796,288 | 2 | 1 | 3 | 0 |
| Case 89 | 2 | 169,797,652 | 170,175,352 | 3 | 1 | 4 | 0 |
| Case 89 | 2 | 170,175,394 | 173,675,359 | 2 | 1 | 3 | 0 |
| Case 89 | 2 | 173,679,008 | 175,386,861 | 2 | 2 | 4 | 0 |
| Case 89 | 2 | 175,393,104 | 179,410,980 | 2 | 1 | 3 | 0 |
| Case 89 | 2 | 179,411,011 | 179,452,782 | 3 | 1 | 4 | 0 |
| Case 89 | 2 | 179,453,426 | 194,748,016 | 2 | 1 | 3 | 0 |
| Case 89 | 2 | 194,749,557 | 199,414,462 | 3 | 1 | 4 | 0 |
| Case 89 | 2 | 199,438,565 | 243,048,760 | 2 | 1 | 3 | 0 |
| Case 89 | 3 | 61,495      | 684,744     | 2 | 2 | 4 | 0 |
| Case 89 | 3 | 698,777     | 3,099,460   | 2 | 1 | 3 | 0 |
| Case 89 | 3 | 3,100,615   | 3,767,186   | 2 | 2 | 4 | 0 |
| Case 89 | 3 | 3,769,424   | 5,312,162   | 2 | 1 | 3 | 0 |
| Case 89 | 3 | 5,312,819   | 5,625,761   | 2 | 2 | 4 | 0 |
| Case 89 | 3 | 5,626,851   | 7,011,962   | 2 | 1 | 3 | 0 |
| Case 89 | 3 | 7,012,842   | 8,155,409   | 2 | 2 | 4 | 0 |
| Case 89 | 3 | 8,159,754   | 9,262,650   | 2 | 1 | 3 | 0 |
| Case 89 | 3 | 9,265,620   | 9,870,958   | 2 | 2 | 4 | 0 |
| Case 89 | 3 | 9,870,973   | 10,157,232  | 2 | 1 | 3 | 0 |
| Case 89 | 3 | 10,167,112  | 10,659,768  | 2 | 2 | 4 | 0 |
| Case 89 | 3 | 10,659,811  | 21,841,904  | 2 | 1 | 3 | 0 |
| Case 89 | 3 | 21,844,883  | 24,346,939  | 2 | 0 | 2 | 1 |
| Case 89 | 3 | 24,346,981  | 25,561,488  | 3 | 0 | 3 | 1 |
| Case 89 | 3 | 25,564,929  | 30,842,460  | 2 | 0 | 2 | 1 |
| Case 89 | 3 | 30,842,517  | 31,817,544  | 3 | 0 | 3 | 1 |
| Case 89 | 3 | 31,817,884  | 38,158,348  | 2 | 0 | 2 | 1 |
| Case 89 | 3 | 38,158,380  | 39,715,764  | 3 | 0 | 3 | 1 |
| Case 89 | 3 | 39,749,593  | 42,233,759  | 2 | 0 | 2 | 1 |
| Case 89 | 3 | 42,236,415  | 42,679,132  | 3 | 0 | 3 | 1 |
| Case 89 | 3 | 42,679,382  | 42,880,490  | 2 | 0 | 2 | 1 |
| Case 89 | 3 | 42,887,680  | 43,362,597  | 3 | 0 | 3 | 1 |
| Case 89 | 3 | 43,368,673  | 44,974,429  | 2 | 0 | 2 | 1 |
| Case 89 | 3 | 44,974,433  | 45,993,606  | 3 | 0 | 3 | 1 |
| Case 89 | 3 | 45,996,877  | 46,245,424  | 2 | 0 | 2 | 1 |
| Case 89 | 3 | 46,245,548  | 46,952,777  | 3 | 0 | 3 | 1 |
| Case 89 | 3 | 46,961,910  | 47,753,950  | 2 | 0 | 2 | 1 |
| Case 89 | 3 | 47,777,540  | 76,943,884  | 2 | 1 | 3 | 0 |
| Case 89 | 3 | 76,947,105  | 77,868,589  | 1 | 1 | 2 | 0 |
| Case 89 | 3 | 77,885,601  | 80,010,209  | 2 | 0 | 2 | 1 |
| Case 89 | 3 | 80,013,246  | 81,898,999  | 2 | 1 | 3 | 0 |
| Case 89 | 3 | 81,905,441  | 84,261,595  | 2 | 0 | 2 | 1 |
| Case 89 | 3 | 84,270,877  | 86,558,884  | 2 | 1 | 3 | 0 |
| Case 89 | 3 | 86,571,808  | 90,442,925  | 2 | 0 | 2 | 1 |
| Case 89 | 3 | 93,537,290  | 93,973,213  | 2 | 0 | 2 | 1 |
| Case 89 | 3 | 93,979,534  | 97,909,666  | 3 | 0 | 3 | 1 |

|         |   |             |             |   |   |   |   |
|---------|---|-------------|-------------|---|---|---|---|
| Case 89 | 3 | 97,917,256  | 98,814,043  | 2 | 0 | 2 | 1 |
| Case 89 | 3 | 98,831,335  | 102,093,452 | 3 | 0 | 3 | 1 |
| Case 89 | 3 | 102,093,492 | 102,862,268 | 2 | 0 | 2 | 1 |
| Case 89 | 3 | 102,864,676 | 115,527,211 | 3 | 0 | 3 | 1 |
| Case 89 | 3 | 115,528,760 | 116,011,091 | 3 | 1 | 4 | 0 |
| Case 89 | 3 | 116,017,931 | 117,239,883 | 2 | 1 | 3 | 0 |
| Case 89 | 3 | 117,244,009 | 117,794,284 | 3 | 1 | 4 | 0 |
| Case 89 | 3 | 117,800,545 | 118,204,601 | 3 | 0 | 3 | 1 |
| Case 89 | 3 | 118,206,941 | 118,644,960 | 3 | 1 | 4 | 0 |
| Case 89 | 3 | 118,645,038 | 119,151,048 | 3 | 0 | 3 | 1 |
| Case 89 | 3 | 119,155,746 | 120,626,429 | 2 | 1 | 3 | 0 |
| Case 89 | 3 | 120,674,527 | 173,424,373 | 2 | 2 | 4 | 0 |
| Case 89 | 3 | 173,431,705 | 179,475,272 | 3 | 0 | 3 | 1 |
| Case 89 | 3 | 179,483,498 | 180,685,872 | 2 | 0 | 2 | 1 |
| Case 89 | 3 | 180,691,661 | 195,963,910 | 3 | 0 | 3 | 1 |
| Case 89 | 3 | 195,964,298 | 197,031,608 | 2 | 0 | 2 | 1 |
| Case 89 | 3 | 197,034,985 | 197,260,358 | 3 | 0 | 3 | 1 |
| Case 89 | 3 | 197,260,370 | 197,503,828 | 2 | 0 | 2 | 1 |
| Case 89 | 3 | 197,504,916 | 197,838,262 | 3 | 0 | 3 | 1 |
| Case 89 | 4 | 71,566      | 899,143     | 2 | 0 | 2 | 1 |
| Case 89 | 4 | 905,524     | 2,517,447   | 2 | 1 | 3 | 0 |
| Case 89 | 4 | 2,559,990   | 6,034,039   | 2 | 0 | 2 | 1 |
| Case 89 | 4 | 6,042,732   | 6,303,022   | 2 | 1 | 3 | 0 |
| Case 89 | 4 | 6,303,072   | 7,427,899   | 2 | 0 | 2 | 1 |
| Case 89 | 4 | 7,428,355   | 7,509,758   | 3 | 0 | 3 | 1 |
| Case 89 | 4 | 7,513,983   | 31,872,574  | 2 | 0 | 2 | 1 |
| Case 89 | 4 | 31,890,470  | 37,020,558  | 2 | 1 | 3 | 0 |
| Case 89 | 4 | 37,034,349  | 37,302,992  | 2 | 2 | 4 | 0 |
| Case 89 | 4 | 37,310,608  | 41,204,395  | 2 | 1 | 3 | 0 |
| Case 89 | 4 | 41,204,982  | 42,122,289  | 2 | 2 | 4 | 0 |
| Case 89 | 4 | 42,125,621  | 45,927,431  | 2 | 1 | 3 | 0 |
| Case 89 | 4 | 45,929,172  | 49,620,898  | 2 | 2 | 4 | 0 |
| Case 89 | 4 | 52,697,856  | 55,049,751  | 2 | 2 | 4 | 0 |
| Case 89 | 4 | 55,061,398  | 89,052,964  | 3 | 0 | 3 | 1 |
| Case 89 | 4 | 89,052,998  | 89,869,332  | 2 | 0 | 2 | 1 |
| Case 89 | 4 | 89,879,663  | 94,830,161  | 3 | 0 | 3 | 1 |
| Case 89 | 4 | 94,830,314  | 95,579,800  | 2 | 0 | 2 | 1 |
| Case 89 | 4 | 95,583,657  | 97,627,011  | 3 | 0 | 3 | 1 |
| Case 89 | 4 | 97,627,858  | 99,387,827  | 2 | 0 | 2 | 1 |
| Case 89 | 4 | 99,392,101  | 99,800,310  | 3 | 0 | 3 | 1 |
| Case 89 | 4 | 99,808,872  | 100,066,332 | 2 | 0 | 2 | 1 |
| Case 89 | 4 | 100,067,337 | 106,819,144 | 3 | 0 | 3 | 1 |
| Case 89 | 4 | 106,820,344 | 141,805,557 | 2 | 0 | 2 | 1 |
| Case 89 | 4 | 141,812,185 | 141,890,683 | 3 | 0 | 3 | 1 |
| Case 89 | 4 | 141,891,566 | 149,624,705 | 2 | 0 | 2 | 1 |
| Case 89 | 4 | 149,625,757 | 150,267,639 | 3 | 0 | 3 | 1 |
| Case 89 | 4 | 150,280,975 | 154,669,859 | 2 | 0 | 2 | 1 |
| Case 89 | 4 | 154,669,901 | 155,287,535 | 3 | 0 | 3 | 1 |
| Case 89 | 4 | 155,287,548 | 161,856,343 | 2 | 0 | 2 | 1 |
| Case 89 | 4 | 161,861,640 | 161,907,084 | 6 | 0 | 6 | 1 |
| Case 89 | 4 | 161,912,988 | 171,327,181 | 2 | 0 | 2 | 1 |
| Case 89 | 4 | 171,339,965 | 171,499,216 | 5 | 0 | 5 | 1 |
| Case 89 | 4 | 171,505,217 | 171,872,498 | 4 | 0 | 4 | 1 |
| Case 89 | 4 | 171,884,710 | 173,323,928 | 3 | 0 | 3 | 1 |
| Case 89 | 4 | 173,324,694 | 175,157,743 | 4 | 0 | 4 | 1 |
| Case 89 | 4 | 175,158,412 | 188,317,381 | 3 | 0 | 3 | 1 |
| Case 89 | 4 | 188,317,437 | 190,394,821 | 2 | 0 | 2 | 1 |
| Case 89 | 4 | 190,407,970 | 190,963,766 | 3 | 0 | 3 | 1 |
| Case 89 | 5 | 38,139      | 1,034,875   | 2 | 2 | 4 | 0 |
| Case 89 | 5 | 1,034,879   | 1,321,873   | 2 | 1 | 3 | 0 |
| Case 89 | 5 | 1,321,928   | 1,778,464   | 2 | 2 | 4 | 0 |

|         |   |             |             |   |   |   |   |
|---------|---|-------------|-------------|---|---|---|---|
| Case 89 | 5 | 1,778,473   | 2,802,282   | 2 | 1 | 3 | 0 |
| Case 89 | 5 | 2,809,055   | 3,904,292   | 2 | 2 | 4 | 0 |
| Case 89 | 5 | 3,919,288   | 4,565,002   | 2 | 1 | 3 | 0 |
| Case 89 | 5 | 4,568,974   | 5,418,792   | 2 | 2 | 4 | 0 |
| Case 89 | 5 | 5,419,547   | 5,600,683   | 2 | 1 | 3 | 0 |
| Case 89 | 5 | 5,601,717   | 7,816,645   | 2 | 2 | 4 | 0 |
| Case 89 | 5 | 7,817,036   | 8,073,928   | 2 | 1 | 3 | 0 |
| Case 89 | 5 | 8,074,665   | 8,794,278   | 2 | 2 | 4 | 0 |
| Case 89 | 5 | 8,794,957   | 9,234,541   | 2 | 1 | 3 | 0 |
| Case 89 | 5 | 9,234,736   | 11,854,197  | 2 | 2 | 4 | 0 |
| Case 89 | 5 | 11,855,867  | 13,434,851  | 2 | 1 | 3 | 0 |
| Case 89 | 5 | 13,441,359  | 13,719,141  | 2 | 2 | 4 | 0 |
| Case 89 | 5 | 13,719,144  | 13,852,098  | 2 | 1 | 3 | 0 |
| Case 89 | 5 | 13,859,587  | 14,427,887  | 2 | 2 | 4 | 0 |
| Case 89 | 5 | 14,431,980  | 15,900,124  | 2 | 1 | 3 | 0 |
| Case 89 | 5 | 15,904,024  | 17,404,483  | 2 | 2 | 4 | 0 |
| Case 89 | 5 | 17,404,549  | 18,908,745  | 2 | 1 | 3 | 0 |
| Case 89 | 5 | 18,909,675  | 19,185,179  | 2 | 2 | 4 | 0 |
| Case 89 | 5 | 19,188,359  | 26,636,294  | 2 | 1 | 3 | 0 |
| Case 89 | 5 | 26,637,115  | 28,376,355  | 2 | 2 | 4 | 0 |
| Case 89 | 5 | 28,380,056  | 29,193,495  | 2 | 1 | 3 | 0 |
| Case 89 | 5 | 29,193,998  | 46,349,193  | 2 | 2 | 4 | 0 |
| Case 89 | 5 | 46,378,957  | 46,399,093  | 2 | 0 | 2 | 1 |
| Case 89 | 5 | 49,457,282  | 53,815,413  | 2 | 0 | 2 | 1 |
| Case 89 | 5 | 53,815,495  | 54,083,387  | 3 | 0 | 3 | 1 |
| Case 89 | 5 | 54,087,671  | 55,704,176  | 2 | 0 | 2 | 1 |
| Case 89 | 5 | 55,706,081  | 55,892,384  | 3 | 0 | 3 | 1 |
| Case 89 | 5 | 55,892,458  | 60,936,296  | 2 | 0 | 2 | 1 |
| Case 89 | 5 | 60,936,935  | 61,122,159  | 3 | 0 | 3 | 1 |
| Case 89 | 5 | 61,125,018  | 65,950,148  | 2 | 0 | 2 | 1 |
| Case 89 | 5 | 65,951,378  | 66,324,295  | 3 | 0 | 3 | 1 |
| Case 89 | 5 | 66,326,646  | 67,220,196  | 2 | 0 | 2 | 1 |
| Case 89 | 5 | 67,221,604  | 67,777,856  | 3 | 0 | 3 | 1 |
| Case 89 | 5 | 67,779,809  | 71,495,041  | 2 | 0 | 2 | 1 |
| Case 89 | 5 | 71,495,109  | 71,814,128  | 3 | 0 | 3 | 1 |
| Case 89 | 5 | 71,846,721  | 73,187,660  | 2 | 0 | 2 | 1 |
| Case 89 | 5 | 73,188,022  | 73,886,691  | 3 | 0 | 3 | 1 |
| Case 89 | 5 | 73,894,929  | 75,337,594  | 2 | 0 | 2 | 1 |
| Case 89 | 5 | 75,342,509  | 75,602,703  | 3 | 0 | 3 | 1 |
| Case 89 | 5 | 75,604,851  | 90,231,238  | 2 | 0 | 2 | 1 |
| Case 89 | 5 | 90,233,933  | 90,510,809  | 3 | 0 | 3 | 1 |
| Case 89 | 5 | 90,521,117  | 107,066,531 | 2 | 0 | 2 | 1 |
| Case 89 | 5 | 107,071,505 | 107,313,403 | 3 | 0 | 3 | 1 |
| Case 89 | 5 | 107,316,915 | 112,461,641 | 2 | 0 | 2 | 1 |
| Case 89 | 5 | 112,464,953 | 112,771,824 | 3 | 0 | 3 | 1 |
| Case 89 | 5 | 112,780,914 | 131,195,002 | 2 | 0 | 2 | 1 |
| Case 89 | 5 | 131,233,083 | 131,915,673 | 3 | 0 | 3 | 1 |
| Case 89 | 5 | 131,915,697 | 132,534,021 | 2 | 0 | 2 | 1 |
| Case 89 | 5 | 132,534,059 | 133,139,439 | 3 | 0 | 3 | 1 |
| Case 89 | 5 | 133,140,038 | 134,250,146 | 2 | 0 | 2 | 1 |
| Case 89 | 5 | 134,253,500 | 136,997,619 | 3 | 0 | 3 | 1 |
| Case 89 | 5 | 136,998,182 | 139,222,208 | 2 | 0 | 2 | 1 |
| Case 89 | 5 | 139,222,591 | 149,276,198 | 3 | 0 | 3 | 1 |
| Case 89 | 5 | 149,276,279 | 149,675,349 | 4 | 0 | 4 | 1 |
| Case 89 | 5 | 149,676,943 | 158,750,769 | 3 | 0 | 3 | 1 |
| Case 89 | 5 | 158,751,249 | 159,488,365 | 4 | 0 | 4 | 1 |
| Case 89 | 5 | 159,488,697 | 178,756,557 | 3 | 0 | 3 | 1 |
| Case 89 | 5 | 178,758,909 | 179,285,781 | 2 | 0 | 2 | 1 |
| Case 89 | 5 | 179,290,477 | 179,672,825 | 3 | 0 | 3 | 1 |
| Case 89 | 5 | 179,674,888 | 180,057,783 | 2 | 0 | 2 | 1 |
| Case 89 | 5 | 180,058,761 | 180,693,127 | 3 | 0 | 3 | 1 |

|         |   |             |             |   |   |   |   |
|---------|---|-------------|-------------|---|---|---|---|
| Case 89 | 6 | 108,666     | 58,752,089  | 2 | 1 | 3 | 0 |
| Case 89 | 6 | 61,891,118  | 102,485,159 | 2 | 1 | 3 | 0 |
| Case 89 | 6 | 102,492,342 | 103,484,412 | 1 | 1 | 2 | 0 |
| Case 89 | 6 | 103,485,282 | 169,334,481 | 2 | 1 | 3 | 0 |
| Case 89 | 6 | 169,334,898 | 170,270,028 | 1 | 1 | 2 | 0 |
| Case 89 | 6 | 170,272,641 | 170,980,171 | 3 | 1 | 4 | 0 |
| Case 89 | 7 | 44,935      | 8,508,026   | 2 | 2 | 4 | 0 |
| Case 89 | 7 | 8,522,345   | 9,234,364   | 3 | 2 | 5 | 0 |
| Case 89 | 7 | 9,235,662   | 12,972,685  | 2 | 2 | 4 | 0 |
| Case 89 | 7 | 12,982,479  | 13,476,506  | 3 | 2 | 5 | 0 |
| Case 89 | 7 | 13,477,214  | 20,327,258  | 2 | 2 | 4 | 0 |
| Case 89 | 7 | 20,331,713  | 20,766,752  | 3 | 2 | 5 | 0 |
| Case 89 | 7 | 20,766,943  | 48,117,684  | 2 | 2 | 4 | 0 |
| Case 89 | 7 | 48,127,194  | 48,321,010  | 3 | 2 | 5 | 0 |
| Case 89 | 7 | 48,321,043  | 52,432,938  | 2 | 2 | 4 | 0 |
| Case 89 | 7 | 52,433,121  | 52,733,291  | 3 | 2 | 5 | 0 |
| Case 89 | 7 | 52,733,866  | 58,019,061  | 2 | 2 | 4 | 0 |
| Case 89 | 7 | 61,056,053  | 97,044,705  | 2 | 2 | 4 | 0 |
| Case 89 | 7 | 97,061,931  | 99,280,884  | 3 | 0 | 3 | 1 |
| Case 89 | 7 | 99,294,472  | 99,365,983  | 2 | 0 | 2 | 1 |
| Case 89 | 7 | 99,365,994  | 100,675,082 | 3 | 0 | 3 | 1 |
| Case 89 | 7 | 100,675,128 | 100,675,959 | 2 | 0 | 2 | 1 |
| Case 89 | 7 | 100,675,976 | 101,918,630 | 3 | 0 | 3 | 1 |
| Case 89 | 7 | 101,921,229 | 102,455,279 | 2 | 0 | 2 | 1 |
| Case 89 | 7 | 102,458,296 | 109,736,919 | 3 | 0 | 3 | 1 |
| Case 89 | 7 | 109,738,166 | 111,533,520 | 2 | 0 | 2 | 1 |
| Case 89 | 7 | 111,540,494 | 112,407,616 | 3 | 0 | 3 | 1 |
| Case 89 | 7 | 112,407,697 | 113,518,157 | 2 | 0 | 2 | 1 |
| Case 89 | 7 | 113,518,262 | 118,652,797 | 3 | 0 | 3 | 1 |
| Case 89 | 7 | 118,669,625 | 120,268,303 | 2 | 0 | 2 | 1 |
| Case 89 | 7 | 120,273,226 | 124,887,218 | 3 | 0 | 3 | 1 |
| Case 89 | 7 | 124,890,172 | 125,848,263 | 2 | 0 | 2 | 1 |
| Case 89 | 7 | 125,853,688 | 149,486,367 | 3 | 0 | 3 | 1 |
| Case 89 | 7 | 149,486,377 | 149,529,970 | 2 | 0 | 2 | 1 |
| Case 89 | 7 | 149,530,894 | 157,825,009 | 3 | 0 | 3 | 1 |
| Case 89 | 7 | 157,827,547 | 158,020,147 | 2 | 0 | 2 | 1 |
| Case 89 | 7 | 158,022,103 | 159,119,486 | 3 | 0 | 3 | 1 |
| Case 89 | 8 | 164,984     | 714,648     | 1 | 0 | 1 | 0 |
| Case 89 | 8 | 719,043     | 3,500,352   | 7 | 0 | 7 | 1 |
| Case 89 | 8 | 3,502,239   | 9,290,056   | 6 | 0 | 6 | 1 |
| Case 89 | 8 | 9,290,753   | 9,745,798   | 0 | 0 | 0 | 0 |
| Case 89 | 8 | 9,758,230   | 13,027,912  | 7 | 0 | 7 | 1 |
| Case 89 | 8 | 13,034,369  | 13,912,357  | 3 | 0 | 3 | 1 |
| Case 89 | 8 | 13,918,143  | 13,921,358  | 1 | 0 | 1 | 0 |
| Case 89 | 8 | 13,923,923  | 16,272,892  | 7 | 0 | 7 | 1 |
| Case 89 | 8 | 16,282,259  | 20,590,669  | 3 | 0 | 3 | 1 |
| Case 89 | 8 | 20,592,077  | 35,316,657  | 2 | 0 | 2 | 1 |
| Case 89 | 8 | 35,316,788  | 39,397,015  | 2 | 2 | 4 | 0 |
| Case 89 | 8 | 39,399,057  | 43,657,438  | 2 | 1 | 3 | 0 |
| Case 89 | 8 | 43,674,370  | 43,791,691  | 1 | 1 | 2 | 0 |
| Case 89 | 8 | 46,886,735  | 50,396,852  | 1 | 1 | 2 | 0 |
| Case 89 | 8 | 50,403,271  | 50,416,266  | 2 | 1 | 3 | 0 |
| Case 89 | 8 | 50,430,756  | 50,539,763  | 6 | 0 | 6 | 1 |
| Case 89 | 8 | 50,545,758  | 50,560,660  | 2 | 1 | 3 | 0 |
| Case 89 | 8 | 50,580,952  | 51,465,681  | 1 | 1 | 2 | 0 |
| Case 89 | 8 | 51,465,733  | 67,909,062  | 2 | 1 | 3 | 0 |
| Case 89 | 8 | 67,922,949  | 69,138,454  | 2 | 2 | 4 | 0 |
| Case 89 | 8 | 69,140,097  | 77,136,588  | 2 | 1 | 3 | 0 |
| Case 89 | 8 | 77,137,533  | 78,265,312  | 3 | 1 | 4 | 0 |
| Case 89 | 8 | 78,271,372  | 78,394,149  | 2 | 1 | 3 | 0 |
| Case 89 | 8 | 78,405,264  | 81,639,511  | 1 | 1 | 2 | 0 |

|         |    |             |             |   |   |   |   |
|---------|----|-------------|-------------|---|---|---|---|
| Case 89 | 8  | 81,640,595  | 87,149,808  | 2 | 1 | 3 | 0 |
| Case 89 | 8  | 87,151,779  | 87,529,297  | 4 | 0 | 4 | 1 |
| Case 89 | 8  | 87,540,832  | 88,190,551  | 3 | 1 | 4 | 0 |
| Case 89 | 8  | 88,191,970  | 89,003,632  | 2 | 1 | 3 | 0 |
| Case 89 | 8  | 89,006,607  | 123,088,145 | 1 | 1 | 2 | 0 |
| Case 89 | 8  | 123,093,555 | 143,995,743 | 3 | 1 | 4 | 0 |
| Case 89 | 8  | 143,999,146 | 145,764,544 | 2 | 1 | 3 | 0 |
| Case 89 | 8  | 145,770,648 | 146,293,414 | 2 | 2 | 4 | 0 |
| Case 89 | 9  | 46,587      | 32,570,989  | 2 | 0 | 2 | 1 |
| Case 89 | 9  | 32,572,932  | 37,055,109  | 3 | 0 | 3 | 1 |
| Case 89 | 9  | 37,056,373  | 46,944,322  | 2 | 0 | 2 | 1 |
| Case 89 | 9  | 65,629,772  | 75,872,324  | 2 | 0 | 2 | 1 |
| Case 89 | 9  | 75,877,116  | 77,427,237  | 5 | 0 | 5 | 1 |
| Case 89 | 9  | 77,435,221  | 77,436,643  | 2 | 1 | 3 | 0 |
| Case 89 | 9  | 77,441,137  | 81,870,379  | 6 | 0 | 6 | 1 |
| Case 89 | 9  | 81,870,811  | 81,872,880  | 2 | 0 | 2 | 1 |
| Case 89 | 9  | 81,873,321  | 81,873,321  | 6 | 0 | 6 | 1 |
| Case 89 | 9  | 81,874,005  | 83,029,869  | 5 | 0 | 5 | 1 |
| Case 89 | 9  | 83,034,282  | 83,540,744  | 6 | 0 | 6 | 1 |
| Case 89 | 9  | 83,541,272  | 83,599,708  | 2 | 0 | 2 | 1 |
| Case 89 | 9  | 83,603,221  | 86,244,359  | 6 | 0 | 6 | 1 |
| Case 89 | 9  | 86,253,482  | 86,297,871  | 2 | 0 | 2 | 1 |
| Case 89 | 9  | 86,304,008  | 86,796,094  | 3 | 0 | 3 | 1 |
| Case 89 | 9  | 86,802,590  | 87,117,500  | 5 | 0 | 5 | 1 |
| Case 89 | 9  | 87,118,778  | 87,316,037  | 3 | 0 | 3 | 1 |
| Case 89 | 9  | 87,321,367  | 87,325,623  | 2 | 0 | 2 | 1 |
| Case 89 | 9  | 87,338,511  | 94,391,746  | 6 | 0 | 6 | 1 |
| Case 89 | 9  | 94,394,640  | 96,469,075  | 5 | 0 | 5 | 1 |
| Case 89 | 9  | 96,483,140  | 97,487,704  | 6 | 0 | 6 | 1 |
| Case 89 | 9  | 97,503,985  | 98,488,882  | 5 | 0 | 5 | 1 |
| Case 89 | 9  | 98,493,505  | 99,521,123  | 3 | 0 | 3 | 1 |
| Case 89 | 9  | 99,521,136  | 99,525,805  | 1 | 0 | 1 | 0 |
| Case 89 | 9  | 99,537,071  | 105,503,295 | 3 | 0 | 3 | 1 |
| Case 89 | 9  | 105,503,706 | 107,050,093 | 2 | 0 | 2 | 1 |
| Case 89 | 9  | 107,054,520 | 118,068,722 | 3 | 0 | 3 | 1 |
| Case 89 | 9  | 118,070,259 | 118,397,913 | 5 | 0 | 5 | 1 |
| Case 89 | 9  | 118,405,173 | 119,901,378 | 3 | 0 | 3 | 1 |
| Case 89 | 9  | 119,903,506 | 120,448,498 | 5 | 0 | 5 | 1 |
| Case 89 | 9  | 120,449,466 | 121,529,204 | 4 | 0 | 4 | 1 |
| Case 89 | 9  | 121,529,812 | 121,929,412 | 5 | 0 | 5 | 1 |
| Case 89 | 9  | 121,929,511 | 122,133,105 | 4 | 0 | 4 | 1 |
| Case 89 | 9  | 122,138,602 | 122,301,551 | 5 | 0 | 5 | 1 |
| Case 89 | 9  | 122,303,614 | 126,220,130 | 3 | 0 | 3 | 1 |
| Case 89 | 9  | 126,220,148 | 127,039,017 | 1 | 0 | 1 | 0 |
| Case 89 | 9  | 127,052,272 | 135,241,588 | 3 | 0 | 3 | 1 |
| Case 89 | 9  | 135,245,867 | 136,029,295 | 5 | 0 | 5 | 1 |
| Case 89 | 9  | 136,029,301 | 136,248,949 | 4 | 0 | 4 | 1 |
| Case 89 | 9  | 136,251,026 | 136,498,761 | 5 | 0 | 5 | 1 |
| Case 89 | 9  | 136,500,203 | 136,597,550 | 4 | 0 | 4 | 1 |
| Case 89 | 9  | 136,597,582 | 138,146,809 | 5 | 0 | 5 | 1 |
| Case 89 | 9  | 138,146,828 | 138,529,219 | 4 | 0 | 4 | 1 |
| Case 89 | 9  | 138,529,722 | 139,637,087 | 5 | 0 | 5 | 1 |
| Case 89 | 9  | 139,638,740 | 141,066,491 | 4 | 0 | 4 | 1 |
| Case 89 | 10 | 98,087      | 1,855,203   | 3 | 0 | 3 | 1 |
| Case 89 | 10 | 1,860,998   | 1,991,225   | 2 | 0 | 2 | 1 |
| Case 89 | 10 | 1,993,586   | 2,761,819   | 3 | 0 | 3 | 1 |
| Case 89 | 10 | 2,762,427   | 2,826,548   | 2 | 0 | 2 | 1 |
| Case 89 | 10 | 2,828,634   | 7,605,101   | 3 | 0 | 3 | 1 |
| Case 89 | 10 | 7,605,146   | 8,005,959   | 2 | 0 | 2 | 1 |
| Case 89 | 10 | 8,005,988   | 15,828,645  | 3 | 0 | 3 | 1 |
| Case 89 | 10 | 15,831,755  | 16,395,866  | 2 | 0 | 2 | 1 |

|         |    |             |             |   |   |   |   |
|---------|----|-------------|-------------|---|---|---|---|
| Case 89 | 10 | 16,396,872  | 18,789,267  | 3 | 0 | 3 | 1 |
| Case 89 | 10 | 18,789,498  | 18,991,696  | 2 | 0 | 2 | 1 |
| Case 89 | 10 | 18,993,303  | 20,290,812  | 3 | 0 | 3 | 1 |
| Case 89 | 10 | 20,290,835  | 24,564,653  | 2 | 0 | 2 | 1 |
| Case 89 | 10 | 24,565,181  | 24,833,137  | 3 | 0 | 3 | 1 |
| Case 89 | 10 | 24,833,355  | 29,274,952  | 2 | 0 | 2 | 1 |
| Case 89 | 10 | 29,275,494  | 29,434,036  | 3 | 0 | 3 | 1 |
| Case 89 | 10 | 29,437,892  | 39,097,912  | 2 | 0 | 2 | 1 |
| Case 89 | 10 | 42,436,301  | 42,682,133  | 2 | 0 | 2 | 1 |
| Case 89 | 10 | 42,725,663  | 110,625,693 | 2 | 1 | 3 | 0 |
| Case 89 | 10 | 110,636,462 | 135,223,323 | 3 | 0 | 3 | 1 |
| Case 89 | 10 | 135,224,960 | 135,477,883 | 4 | 0 | 4 | 1 |
| Case 89 | 11 | 193,146     | 7,670,160   | 3 | 0 | 3 | 1 |
| Case 89 | 11 | 7,670,353   | 8,148,287   | 3 | 1 | 4 | 0 |
| Case 89 | 11 | 8,148,301   | 10,668,522  | 2 | 1 | 3 | 0 |
| Case 89 | 11 | 10,669,228  | 15,398,601  | 3 | 2 | 5 | 0 |
| Case 89 | 11 | 15,401,144  | 39,593,038  | 2 | 2 | 4 | 0 |
| Case 89 | 11 | 39,604,010  | 42,113,298  | 3 | 2 | 5 | 0 |
| Case 89 | 11 | 42,115,286  | 43,218,491  | 2 | 2 | 4 | 0 |
| Case 89 | 11 | 43,221,969  | 46,564,272  | 3 | 2 | 5 | 0 |
| Case 89 | 11 | 46,564,927  | 50,332,064  | 2 | 2 | 4 | 0 |
| Case 89 | 11 | 50,345,390  | 51,095,992  | 2 | 0 | 2 | 1 |
| Case 89 | 11 | 51,160,828  | 51,591,253  | 2 | 1 | 3 | 0 |
| Case 89 | 11 | 54,794,237  | 83,215,072  | 2 | 1 | 3 | 0 |
| Case 89 | 11 | 83,231,580  | 89,843,478  | 4 | 1 | 5 | 0 |
| Case 89 | 11 | 89,843,565  | 91,204,664  | 4 | 2 | 6 | 0 |
| Case 89 | 11 | 91,215,718  | 92,612,151  | 3 | 2 | 5 | 0 |
| Case 89 | 11 | 92,612,185  | 92,669,941  | 3 | 1 | 4 | 0 |
| Case 89 | 11 | 92,673,828  | 99,644,206  | 4 | 0 | 4 | 1 |
| Case 89 | 11 | 99,644,668  | 100,226,773 | 5 | 0 | 5 | 1 |
| Case 89 | 11 | 100,226,883 | 101,181,227 | 4 | 0 | 4 | 1 |
| Case 89 | 11 | 101,191,166 | 102,070,361 | 5 | 0 | 5 | 1 |
| Case 89 | 11 | 102,070,639 | 103,157,019 | 4 | 0 | 4 | 1 |
| Case 89 | 11 | 103,157,059 | 103,491,310 | 5 | 0 | 5 | 1 |
| Case 89 | 11 | 103,493,096 | 103,797,349 | 4 | 0 | 4 | 1 |
| Case 89 | 11 | 103,797,828 | 104,539,394 | 5 | 0 | 5 | 1 |
| Case 89 | 11 | 104,551,887 | 107,617,257 | 4 | 0 | 4 | 1 |
| Case 89 | 11 | 107,617,517 | 109,111,782 | 5 | 0 | 5 | 1 |
| Case 89 | 11 | 109,118,149 | 109,127,876 | 2 | 1 | 3 | 0 |
| Case 89 | 11 | 109,127,890 | 109,812,865 | 6 | 0 | 6 | 1 |
| Case 89 | 11 | 109,825,345 | 109,888,898 | 2 | 0 | 2 | 1 |
| Case 89 | 11 | 109,898,785 | 118,427,727 | 3 | 0 | 3 | 1 |
| Case 89 | 11 | 118,428,463 | 118,827,665 | 2 | 0 | 2 | 1 |
| Case 89 | 11 | 118,827,670 | 134,934,063 | 3 | 0 | 3 | 1 |
| Case 89 | 12 | 191,619     | 11,876,790  | 5 | 1 | 6 | 0 |
| Case 89 | 12 | 11,877,420  | 11,927,531  | 2 | 0 | 2 | 1 |
| Case 89 | 12 | 11,929,481  | 14,196,140  | 3 | 0 | 3 | 1 |
| Case 89 | 12 | 14,200,852  | 18,398,806  | 2 | 0 | 2 | 1 |
| Case 89 | 12 | 18,402,485  | 34,758,266  | 2 | 2 | 4 | 0 |
| Case 89 | 12 | 34,781,188  | 34,853,011  | 2 | 1 | 3 | 0 |
| Case 89 | 12 | 37,876,400  | 41,231,443  | 2 | 1 | 3 | 0 |
| Case 89 | 12 | 41,234,584  | 42,013,256  | 2 | 2 | 4 | 0 |
| Case 89 | 12 | 42,015,216  | 46,045,045  | 2 | 1 | 3 | 0 |
| Case 89 | 12 | 46,046,604  | 50,523,964  | 2 | 2 | 4 | 0 |
| Case 89 | 12 | 50,524,345  | 52,567,467  | 2 | 1 | 3 | 0 |
| Case 89 | 12 | 52,567,488  | 52,938,411  | 3 | 1 | 4 | 0 |
| Case 89 | 12 | 52,938,428  | 52,946,498  | 2 | 1 | 3 | 0 |
| Case 89 | 12 | 52,946,510  | 53,495,934  | 2 | 2 | 4 | 0 |
| Case 89 | 12 | 53,497,402  | 53,719,326  | 2 | 1 | 3 | 0 |
| Case 89 | 12 | 53,719,666  | 54,379,295  | 2 | 2 | 4 | 0 |
| Case 89 | 12 | 54,379,335  | 56,704,347  | 2 | 1 | 3 | 0 |

|         |    |             |             |   |   |   |   |
|---------|----|-------------|-------------|---|---|---|---|
| Case 89 | 12 | 56,708,706  | 57,442,037  | 3 | 1 | 4 | 0 |
| Case 89 | 12 | 57,449,610  | 110,662,327 | 2 | 1 | 3 | 0 |
| Case 89 | 12 | 110,687,971 | 132,323,249 | 2 | 2 | 4 | 0 |
| Case 89 | 12 | 132,323,250 | 132,678,089 | 2 | 1 | 3 | 0 |
| Case 89 | 12 | 132,679,063 | 133,810,935 | 2 | 2 | 4 | 0 |
| Case 89 | 13 | 19,058,717  | 20,000,621  | 3 | 0 | 3 | 1 |
| Case 89 | 13 | 20,000,630  | 21,499,444  | 3 | 1 | 4 | 0 |
| Case 89 | 13 | 21,510,900  | 37,882,220  | 3 | 0 | 3 | 1 |
| Case 89 | 13 | 37,885,818  | 37,968,151  | 1 | 0 | 1 | 0 |
| Case 89 | 13 | 37,969,197  | 43,469,222  | 3 | 0 | 3 | 1 |
| Case 89 | 13 | 43,471,403  | 43,767,104  | 3 | 2 | 5 | 0 |
| Case 89 | 13 | 43,767,250  | 43,777,086  | 3 | 1 | 4 | 0 |
| Case 89 | 13 | 43,777,114  | 51,580,537  | 3 | 0 | 3 | 1 |
| Case 89 | 13 | 51,587,440  | 51,816,665  | 3 | 1 | 4 | 0 |
| Case 89 | 13 | 51,817,143  | 55,778,003  | 3 | 0 | 3 | 1 |
| Case 89 | 13 | 55,783,042  | 58,765,648  | 3 | 1 | 4 | 0 |
| Case 89 | 13 | 58,768,674  | 59,608,726  | 3 | 0 | 3 | 1 |
| Case 89 | 13 | 59,613,195  | 60,908,458  | 2 | 2 | 4 | 0 |
| Case 89 | 13 | 60,910,291  | 63,262,970  | 3 | 1 | 4 | 0 |
| Case 89 | 13 | 63,277,176  | 68,491,550  | 1 | 0 | 1 | 0 |
| Case 89 | 13 | 68,505,870  | 69,080,682  | 3 | 0 | 3 | 1 |
| Case 89 | 13 | 69,080,926  | 72,672,811  | 1 | 0 | 1 | 0 |
| Case 89 | 13 | 72,672,867  | 72,882,258  | 2 | 0 | 2 | 1 |
| Case 89 | 13 | 72,887,795  | 73,321,056  | 3 | 0 | 3 | 1 |
| Case 89 | 13 | 73,323,792  | 74,562,669  | 4 | 0 | 4 | 1 |
| Case 89 | 13 | 74,569,006  | 76,721,792  | 3 | 0 | 3 | 1 |
| Case 89 | 13 | 76,726,422  | 77,933,618  | 3 | 2 | 5 | 0 |
| Case 89 | 13 | 77,935,564  | 81,411,946  | 2 | 2 | 4 | 0 |
| Case 89 | 13 | 81,417,896  | 88,040,398  | 3 | 1 | 4 | 0 |
| Case 89 | 13 | 88,047,853  | 113,110,663 | 3 | 0 | 3 | 1 |
| Case 89 | 13 | 113,110,826 | 113,459,221 | 2 | 0 | 2 | 1 |
| Case 89 | 13 | 113,459,343 | 115,103,529 | 3 | 0 | 3 | 1 |
| Case 89 | 14 | 19,280,733  | 19,964,076  | 3 | 0 | 3 | 1 |
| Case 89 | 14 | 20,213,937  | 20,420,338  | 5 | 0 | 5 | 1 |
| Case 89 | 14 | 20,425,051  | 20,844,340  | 2 | 1 | 3 | 0 |
| Case 89 | 14 | 20,844,382  | 21,167,633  | 2 | 2 | 4 | 0 |
| Case 89 | 14 | 21,167,642  | 22,200,989  | 2 | 1 | 3 | 0 |
| Case 89 | 14 | 22,201,888  | 23,072,372  | 3 | 1 | 4 | 0 |
| Case 89 | 14 | 23,072,654  | 24,909,588  | 2 | 1 | 3 | 0 |
| Case 89 | 14 | 24,910,055  | 25,426,899  | 3 | 1 | 4 | 0 |
| Case 89 | 14 | 25,427,787  | 56,302,744  | 2 | 1 | 3 | 0 |
| Case 89 | 14 | 56,307,478  | 56,742,876  | 3 | 1 | 4 | 0 |
| Case 89 | 14 | 56,755,222  | 76,165,549  | 2 | 1 | 3 | 0 |
| Case 89 | 14 | 76,166,481  | 77,168,329  | 3 | 1 | 4 | 0 |
| Case 89 | 14 | 77,168,503  | 79,433,190  | 2 | 1 | 3 | 0 |
| Case 89 | 14 | 79,433,593  | 90,999,201  | 1 | 1 | 2 | 0 |
| Case 89 | 14 | 91,003,013  | 91,148,877  | 2 | 1 | 3 | 0 |
| Case 89 | 14 | 91,148,925  | 92,505,969  | 1 | 1 | 2 | 0 |
| Case 89 | 14 | 92,506,697  | 92,959,940  | 2 | 1 | 3 | 0 |
| Case 89 | 14 | 92,960,148  | 94,088,203  | 1 | 1 | 2 | 0 |
| Case 89 | 14 | 94,088,266  | 95,911,835  | 2 | 1 | 3 | 0 |
| Case 89 | 14 | 95,911,943  | 96,567,869  | 1 | 1 | 2 | 0 |
| Case 89 | 14 | 96,574,434  | 97,173,569  | 2 | 1 | 3 | 0 |
| Case 89 | 14 | 97,176,198  | 99,996,109  | 1 | 1 | 2 | 0 |
| Case 89 | 14 | 100,002,814 | 101,542,066 | 2 | 1 | 3 | 0 |
| Case 89 | 14 | 101,545,096 | 105,395,256 | 1 | 1 | 2 | 0 |
| Case 89 | 14 | 105,395,742 | 105,609,130 | 2 | 1 | 3 | 0 |
| Case 89 | 14 | 105,609,229 | 107,287,663 | 1 | 1 | 2 | 0 |
| Case 89 | 15 | 20,034,919  | 22,867,532  | 2 | 0 | 2 | 1 |
| Case 89 | 15 | 22,867,569  | 23,727,655  | 3 | 0 | 3 | 1 |
| Case 89 | 15 | 23,730,704  | 24,327,659  | 2 | 0 | 2 | 1 |



|         |    |             |             |   |   |   |   |
|---------|----|-------------|-------------|---|---|---|---|
| Case 89 | 15 | 24,328,497  | 26,422,354  | 2 | 2 | 4 | 0 |
| Case 89 | 15 | 26,422,689  | 27,997,804  | 2 | 0 | 2 | 1 |
| Case 89 | 15 | 27,999,836  | 28,276,539  | 3 | 0 | 3 | 1 |
| Case 89 | 15 | 28,281,765  | 32,928,853  | 2 | 0 | 2 | 1 |
| Case 89 | 15 | 32,929,081  | 33,209,958  | 3 | 0 | 3 | 1 |
| Case 89 | 15 | 33,210,001  | 33,990,976  | 2 | 0 | 2 | 1 |
| Case 89 | 15 | 33,991,716  | 34,159,749  | 3 | 0 | 3 | 1 |
| Case 89 | 15 | 34,159,782  | 38,773,226  | 2 | 0 | 2 | 1 |
| Case 89 | 15 | 38,773,593  | 40,593,431  | 3 | 0 | 3 | 1 |
| Case 89 | 15 | 40,594,181  | 41,819,250  | 2 | 0 | 2 | 1 |
| Case 89 | 15 | 41,819,367  | 42,111,100  | 3 | 0 | 3 | 1 |
| Case 89 | 15 | 42,111,514  | 42,207,905  | 2 | 0 | 2 | 1 |
| Case 89 | 15 | 42,208,041  | 42,394,482  | 3 | 0 | 3 | 1 |
| Case 89 | 15 | 42,396,282  | 43,769,931  | 2 | 0 | 2 | 1 |
| Case 89 | 15 | 43,771,694  | 44,109,452  | 2 | 2 | 4 | 0 |
| Case 89 | 15 | 44,116,053  | 53,226,360  | 2 | 0 | 2 | 1 |
| Case 89 | 15 | 53,230,059  | 53,812,561  | 3 | 0 | 3 | 1 |
| Case 89 | 15 | 53,815,417  | 57,791,763  | 2 | 0 | 2 | 1 |
| Case 89 | 15 | 57,792,130  | 58,140,674  | 3 | 0 | 3 | 1 |
| Case 89 | 15 | 58,150,369  | 60,710,269  | 2 | 0 | 2 | 1 |
| Case 89 | 15 | 60,715,643  | 62,113,140  | 3 | 0 | 3 | 1 |
| Case 89 | 15 | 62,113,919  | 63,093,824  | 2 | 0 | 2 | 1 |
| Case 89 | 15 | 63,096,808  | 63,880,752  | 3 | 0 | 3 | 1 |
| Case 89 | 15 | 63,880,962  | 64,446,794  | 2 | 0 | 2 | 1 |
| Case 89 | 15 | 64,448,304  | 76,633,551  | 2 | 2 | 4 | 0 |
| Case 89 | 15 | 76,633,575  | 77,907,145  | 2 | 1 | 3 | 0 |
| Case 89 | 15 | 77,907,420  | 79,974,022  | 2 | 2 | 4 | 0 |
| Case 89 | 15 | 79,975,476  | 80,486,402  | 2 | 1 | 3 | 0 |
| Case 89 | 15 | 80,486,581  | 81,193,635  | 2 | 2 | 4 | 0 |
| Case 89 | 15 | 81,199,236  | 84,373,250  | 2 | 1 | 3 | 0 |
| Case 89 | 15 | 84,381,209  | 84,611,451  | 2 | 2 | 4 | 0 |
| Case 89 | 15 | 84,611,494  | 86,890,733  | 2 | 1 | 3 | 0 |
| Case 89 | 15 | 86,892,638  | 87,058,059  | 2 | 2 | 4 | 0 |
| Case 89 | 15 | 87,059,555  | 87,634,881  | 2 | 1 | 3 | 0 |
| Case 89 | 15 | 87,635,058  | 89,153,744  | 2 | 2 | 4 | 0 |
| Case 89 | 15 | 89,154,966  | 90,673,161  | 2 | 1 | 3 | 0 |
| Case 89 | 15 | 90,675,264  | 91,081,791  | 2 | 2 | 4 | 0 |
| Case 89 | 15 | 91,082,869  | 91,485,730  | 2 | 1 | 3 | 0 |
| Case 89 | 15 | 91,485,771  | 91,811,709  | 2 | 2 | 4 | 0 |
| Case 89 | 15 | 91,811,710  | 92,459,551  | 2 | 1 | 3 | 0 |
| Case 89 | 15 | 92,460,694  | 93,560,331  | 2 | 2 | 4 | 0 |
| Case 89 | 15 | 93,561,642  | 101,936,720 | 2 | 1 | 3 | 0 |
| Case 89 | 15 | 101,938,651 | 102,055,559 | 2 | 2 | 4 | 0 |
| Case 89 | 15 | 102,061,971 | 102,461,162 | 3 | 1 | 4 | 0 |
| Case 89 | 16 | 88,165      | 1,183,677   | 3 | 0 | 3 | 1 |
| Case 89 | 16 | 1,184,126   | 1,537,884   | 2 | 0 | 2 | 1 |
| Case 89 | 16 | 1,537,926   | 1,804,357   | 3 | 0 | 3 | 1 |
| Case 89 | 16 | 1,807,723   | 1,842,516   | 2 | 0 | 2 | 1 |
| Case 89 | 16 | 1,849,916   | 2,024,204   | 3 | 0 | 3 | 1 |
| Case 89 | 16 | 2,024,205   | 2,030,091   | 2 | 0 | 2 | 1 |
| Case 89 | 16 | 2,030,114   | 2,130,190   | 3 | 0 | 3 | 1 |
| Case 89 | 16 | 2,130,198   | 2,329,121   | 2 | 0 | 2 | 1 |
| Case 89 | 16 | 2,331,173   | 2,982,708   | 3 | 0 | 3 | 1 |
| Case 89 | 16 | 2,983,138   | 3,227,885   | 2 | 0 | 2 | 1 |
| Case 89 | 16 | 3,230,888   | 3,504,785   | 3 | 0 | 3 | 1 |
| Case 89 | 16 | 3,506,775   | 3,617,306   | 2 | 0 | 2 | 1 |
| Case 89 | 16 | 3,620,927   | 4,281,943   | 3 | 0 | 3 | 1 |
| Case 89 | 16 | 4,296,785   | 4,476,045   | 2 | 0 | 2 | 1 |
| Case 89 | 16 | 4,484,396   | 6,681,184   | 3 | 0 | 3 | 1 |
| Case 89 | 16 | 6,681,637   | 6,682,151   | 1 | 0 | 1 | 0 |
| Case 89 | 16 | 6,682,203   | 6,699,749   | 3 | 0 | 3 | 1 |

|         |    |            |            |   |   |   |   |
|---------|----|------------|------------|---|---|---|---|
| Case 89 | 16 | 6,700,500  | 6,792,188  | 1 | 0 | 1 | 0 |
| Case 89 | 16 | 6,796,804  | 15,654,331 | 3 | 0 | 3 | 1 |
| Case 89 | 16 | 15,656,204 | 15,818,781 | 2 | 0 | 2 | 1 |
| Case 89 | 16 | 15,818,842 | 31,447,788 | 3 | 0 | 3 | 1 |
| Case 89 | 16 | 31,448,168 | 35,285,582 | 2 | 0 | 2 | 1 |
| Case 89 | 16 | 46,450,037 | 47,354,669 | 2 | 0 | 2 | 1 |
| Case 89 | 16 | 47,411,203 | 48,121,987 | 3 | 0 | 3 | 1 |
| Case 89 | 16 | 48,122,456 | 48,479,935 | 4 | 0 | 4 | 1 |
| Case 89 | 16 | 48,488,527 | 49,469,134 | 5 | 0 | 5 | 1 |
| Case 89 | 16 | 49,476,172 | 59,411,607 | 3 | 0 | 3 | 1 |
| Case 89 | 16 | 59,419,461 | 64,216,026 | 2 | 0 | 2 | 1 |
| Case 89 | 16 | 64,216,776 | 69,419,394 | 3 | 0 | 3 | 1 |
| Case 89 | 16 | 69,424,499 | 69,721,415 | 2 | 0 | 2 | 1 |
| Case 89 | 16 | 69,724,845 | 70,841,743 | 3 | 0 | 3 | 1 |
| Case 89 | 16 | 70,841,824 | 70,954,682 | 3 | 1 | 4 | 0 |
| Case 89 | 16 | 70,954,909 | 75,148,064 | 3 | 0 | 3 | 1 |
| Case 89 | 16 | 75,148,093 | 75,928,610 | 2 | 0 | 2 | 1 |
| Case 89 | 16 | 75,929,714 | 88,787,781 | 3 | 0 | 3 | 1 |
| Case 89 | 16 | 88,787,829 | 88,881,635 | 2 | 0 | 2 | 1 |
| Case 89 | 16 | 88,882,257 | 90,274,695 | 3 | 0 | 3 | 1 |
| Case 89 | 17 | 11,885     | 1,204,864  | 3 | 0 | 3 | 1 |
| Case 89 | 17 | 1,206,042  | 1,963,201  | 2 | 0 | 2 | 1 |
| Case 89 | 17 | 1,964,018  | 4,457,363  | 3 | 0 | 3 | 1 |
| Case 89 | 17 | 4,457,510  | 4,499,762  | 2 | 0 | 2 | 1 |
| Case 89 | 17 | 4,500,190  | 9,474,146  | 3 | 0 | 3 | 1 |
| Case 89 | 17 | 9,479,112  | 14,862,284 | 2 | 0 | 2 | 1 |
| Case 89 | 17 | 14,864,886 | 15,039,528 | 3 | 0 | 3 | 1 |
| Case 89 | 17 | 15,044,804 | 15,058,236 | 1 | 0 | 1 | 0 |
| Case 89 | 17 | 15,058,991 | 21,319,342 | 3 | 0 | 3 | 1 |
| Case 89 | 17 | 21,319,388 | 22,242,355 | 2 | 1 | 3 | 0 |
| Case 89 | 17 | 25,268,142 | 25,853,650 | 2 | 1 | 3 | 0 |
| Case 89 | 17 | 25,854,188 | 33,351,917 | 3 | 1 | 4 | 0 |
| Case 89 | 17 | 33,378,750 | 35,746,196 | 3 | 0 | 3 | 1 |
| Case 89 | 17 | 35,748,867 | 37,894,463 | 3 | 1 | 4 | 0 |
| Case 89 | 17 | 37,898,705 | 38,303,547 | 3 | 0 | 3 | 1 |
| Case 89 | 17 | 38,304,356 | 46,925,777 | 2 | 2 | 4 | 0 |
| Case 89 | 17 | 46,926,615 | 47,547,111 | 3 | 2 | 5 | 0 |
| Case 89 | 17 | 47,547,180 | 49,459,341 | 2 | 2 | 4 | 0 |
| Case 89 | 17 | 49,461,290 | 49,853,021 | 3 | 1 | 4 | 0 |
| Case 89 | 17 | 49,856,670 | 49,856,845 | 2 | 1 | 3 | 0 |
| Case 89 | 17 | 49,867,150 | 50,944,581 | 2 | 2 | 4 | 0 |
| Case 89 | 17 | 50,949,615 | 51,862,028 | 3 | 0 | 3 | 1 |
| Case 89 | 17 | 51,862,803 | 54,217,491 | 3 | 1 | 4 | 0 |
| Case 89 | 17 | 54,230,917 | 54,990,800 | 3 | 0 | 3 | 1 |
| Case 89 | 17 | 54,990,964 | 56,002,077 | 3 | 1 | 4 | 0 |
| Case 89 | 17 | 56,002,224 | 57,638,015 | 3 | 0 | 3 | 1 |
| Case 89 | 17 | 57,641,506 | 59,372,034 | 3 | 1 | 4 | 0 |
| Case 89 | 17 | 59,374,867 | 60,017,888 | 3 | 0 | 3 | 1 |
| Case 89 | 17 | 60,018,352 | 63,748,421 | 2 | 2 | 4 | 0 |
| Case 89 | 17 | 63,748,853 | 64,046,278 | 3 | 2 | 5 | 0 |
| Case 89 | 17 | 64,049,869 | 65,599,532 | 2 | 2 | 4 | 0 |
| Case 89 | 17 | 65,607,561 | 65,977,682 | 3 | 1 | 4 | 0 |
| Case 89 | 17 | 65,988,049 | 67,542,493 | 3 | 0 | 3 | 1 |
| Case 89 | 17 | 67,554,920 | 75,398,418 | 3 | 1 | 4 | 0 |
| Case 89 | 17 | 75,398,449 | 80,788,173 | 2 | 1 | 3 | 0 |
| Case 89 | 17 | 80,788,200 | 81,060,040 | 3 | 1 | 4 | 0 |
| Case 89 | 18 | 87,505     | 4,793,499  | 5 | 2 | 7 | 0 |
| Case 89 | 18 | 4,797,073  | 5,015,145  | 5 | 1 | 6 | 0 |
| Case 89 | 18 | 5,020,501  | 5,021,740  | 2 | 0 | 2 | 1 |
| Case 89 | 18 | 5,024,327  | 5,397,388  | 2 | 2 | 4 | 0 |
| Case 89 | 18 | 5,397,404  | 5,398,134  | 2 | 1 | 3 | 0 |

|         |    |             |             |   |   |   |   |
|---------|----|-------------|-------------|---|---|---|---|
| Case 89 | 18 | 5,405,326   | 6,330,209   | 4 | 1 | 5 | 0 |
| Case 89 | 18 | 6,332,345   | 7,382,800   | 4 | 0 | 4 | 1 |
| Case 89 | 18 | 7,382,881   | 8,715,107   | 4 | 1 | 5 | 0 |
| Case 89 | 18 | 8,715,990   | 10,140,629  | 4 | 0 | 4 | 1 |
| Case 89 | 18 | 10,142,323  | 15,249,516  | 5 | 0 | 5 | 1 |
| Case 89 | 18 | 15,330,525  | 15,375,878  | 2 | 1 | 3 | 0 |
| Case 89 | 18 | 18,520,354  | 20,558,567  | 2 | 1 | 3 | 0 |
| Case 89 | 18 | 20,561,675  | 23,307,937  | 3 | 0 | 3 | 1 |
| Case 89 | 18 | 23,319,704  | 24,039,154  | 2 | 0 | 2 | 1 |
| Case 89 | 18 | 24,039,489  | 25,599,702  | 3 | 0 | 3 | 1 |
| Case 89 | 18 | 25,608,097  | 26,075,587  | 2 | 0 | 2 | 1 |
| Case 89 | 18 | 26,085,085  | 30,447,236  | 3 | 0 | 3 | 1 |
| Case 89 | 18 | 30,451,454  | 31,320,069  | 2 | 0 | 2 | 1 |
| Case 89 | 18 | 31,320,099  | 38,768,930  | 3 | 0 | 3 | 1 |
| Case 89 | 18 | 38,770,460  | 40,532,752  | 2 | 0 | 2 | 1 |
| Case 89 | 18 | 40,536,821  | 48,485,967  | 3 | 0 | 3 | 1 |
| Case 89 | 18 | 48,491,524  | 49,765,016  | 1 | 0 | 1 | 0 |
| Case 89 | 18 | 49,770,823  | 50,210,880  | 5 | 0 | 5 | 1 |
| Case 89 | 18 | 50,212,260  | 66,744,288  | 4 | 0 | 4 | 1 |
| Case 89 | 18 | 66,744,308  | 66,758,828  | 1 | 0 | 1 | 0 |
| Case 89 | 18 | 66,758,997  | 74,180,990  | 4 | 0 | 4 | 1 |
| Case 89 | 18 | 74,184,337  | 78,015,180  | 4 | 1 | 5 | 0 |
| Case 89 | 19 | 260,912     | 1,821,637   | 2 | 1 | 3 | 0 |
| Case 89 | 19 | 1,822,668   | 1,956,035   | 1 | 1 | 2 | 0 |
| Case 89 | 19 | 1,960,031   | 9,237,113   | 2 | 1 | 3 | 0 |
| Case 89 | 19 | 9,237,263   | 9,939,092   | 1 | 1 | 2 | 0 |
| Case 89 | 19 | 9,939,831   | 11,978,417  | 2 | 1 | 3 | 0 |
| Case 89 | 19 | 11,978,629  | 12,575,894  | 1 | 1 | 2 | 0 |
| Case 89 | 19 | 12,577,302  | 17,211,568  | 2 | 1 | 3 | 0 |
| Case 89 | 19 | 17,212,570  | 18,248,146  | 1 | 1 | 2 | 0 |
| Case 89 | 19 | 18,255,359  | 19,640,309  | 2 | 1 | 3 | 0 |
| Case 89 | 19 | 19,640,319  | 22,703,220  | 1 | 1 | 2 | 0 |
| Case 89 | 19 | 22,707,258  | 24,629,285  | 2 | 1 | 3 | 0 |
| Case 89 | 19 | 27,732,159  | 42,838,364  | 2 | 1 | 3 | 0 |
| Case 89 | 19 | 42,839,203  | 43,441,194  | 2 | 2 | 4 | 0 |
| Case 89 | 19 | 43,458,563  | 59,012,060  | 2 | 1 | 3 | 0 |
| Case 89 | 19 | 59,012,675  | 59,097,160  | 2 | 2 | 4 | 0 |
| Case 89 | 20 | 63,244      | 304,086     | 2 | 1 | 3 | 0 |
| Case 89 | 20 | 309,692     | 16,659,902  | 1 | 1 | 2 | 0 |
| Case 89 | 20 | 16,660,005  | 26,293,985  | 2 | 0 | 2 | 1 |
| Case 89 | 20 | 29,425,357  | 29,425,357  | 2 | 0 | 2 | 1 |
| Case 89 | 20 | 29,445,644  | 42,264,652  | 3 | 1 | 4 | 0 |
| Case 89 | 20 | 42,264,653  | 46,823,806  | 3 | 2 | 5 | 0 |
| Case 89 | 20 | 46,827,141  | 49,127,785  | 7 | 0 | 7 | 1 |
| Case 89 | 20 | 49,133,069  | 53,617,287  | 6 | 1 | 7 | 0 |
| Case 89 | 20 | 53,619,811  | 62,159,504  | 3 | 1 | 4 | 0 |
| Case 89 | 20 | 62,160,481  | 62,203,597  | 2 | 1 | 3 | 0 |
| Case 89 | 20 | 62,203,708  | 62,948,788  | 3 | 1 | 4 | 0 |
| Case 89 | 21 | 10,827,533  | 10,971,337  | 2 | 0 | 2 | 1 |
| Case 89 | 21 | 14,368,320  | 28,355,042  | 2 | 0 | 2 | 1 |
| Case 89 | 21 | 28,356,604  | 48,100,155  | 3 | 0 | 3 | 1 |
| Case 89 | 22 | 16,114,244  | 22,048,114  | 3 | 0 | 3 | 1 |
| Case 89 | 22 | 22,048,862  | 22,398,859  | 2 | 0 | 2 | 1 |
| Case 89 | 22 | 22,399,916  | 31,927,079  | 3 | 0 | 3 | 1 |
| Case 89 | 22 | 31,942,770  | 32,111,442  | 2 | 0 | 2 | 1 |
| Case 89 | 22 | 32,111,456  | 51,195,728  | 3 | 0 | 3 | 1 |
| Case 91 | 1  | 82,154      | 12,852,872  | 2 | 2 | 4 | 0 |
| Case 91 | 1  | 12,854,507  | 12,961,019  | 4 | 2 | 6 | 0 |
| Case 91 | 1  | 13,176,463  | 121,346,616 | 2 | 2 | 4 | 0 |
| Case 91 | 1  | 142,649,718 | 148,937,908 | 2 | 2 | 4 | 0 |
| Case 91 | 1  | 149,039,031 | 149,201,987 | 1 | 0 | 1 | 0 |

|         |   |             |             |   |   |   |   |
|---------|---|-------------|-------------|---|---|---|---|
| Case 91 | 1 | 149,660,940 | 196,801,025 | 2 | 2 | 4 | 0 |
| Case 91 | 1 | 196,823,300 | 196,887,480 | 1 | 0 | 1 | 0 |
| Case 91 | 1 | 196,892,322 | 215,301,524 | 2 | 2 | 4 | 0 |
| Case 91 | 1 | 215,307,777 | 216,144,049 | 1 | 0 | 1 | 0 |
| Case 91 | 1 | 216,151,789 | 249,218,992 | 2 | 2 | 4 | 0 |
| Case 91 | 2 | 18,674      | 92,081,640  | 2 | 2 | 4 | 0 |
| Case 91 | 2 | 95,429,424  | 206,232,244 | 2 | 2 | 4 | 0 |
| Case 91 | 2 | 206,236,189 | 206,352,140 | 3 | 0 | 3 | 1 |
| Case 91 | 2 | 206,359,207 | 243,048,760 | 2 | 2 | 4 | 0 |
| Case 91 | 3 | 61,495      | 191,245     | 3 | 0 | 3 | 1 |
| Case 91 | 3 | 191,529     | 1,894,541   | 2 | 0 | 2 | 1 |
| Case 91 | 3 | 1,895,810   | 2,079,789   | 3 | 0 | 3 | 1 |
| Case 91 | 3 | 2,080,561   | 2,939,763   | 2 | 0 | 2 | 1 |
| Case 91 | 3 | 2,942,488   | 3,016,114   | 3 | 0 | 3 | 1 |
| Case 91 | 3 | 3,017,397   | 3,248,073   | 2 | 0 | 2 | 1 |
| Case 91 | 3 | 3,248,990   | 3,788,916   | 3 | 0 | 3 | 1 |
| Case 91 | 3 | 3,792,051   | 3,882,283   | 2 | 0 | 2 | 1 |
| Case 91 | 3 | 3,884,459   | 3,920,844   | 3 | 0 | 3 | 1 |
| Case 91 | 3 | 3,925,023   | 4,076,977   | 2 | 0 | 2 | 1 |
| Case 91 | 3 | 4,078,654   | 5,203,776   | 3 | 0 | 3 | 1 |
| Case 91 | 3 | 5,210,178   | 5,234,726   | 2 | 0 | 2 | 1 |
| Case 91 | 3 | 5,241,309   | 5,975,204   | 3 | 0 | 3 | 1 |
| Case 91 | 3 | 5,990,857   | 6,134,126   | 2 | 0 | 2 | 1 |
| Case 91 | 3 | 6,136,434   | 6,486,592   | 3 | 0 | 3 | 1 |
| Case 91 | 3 | 6,488,102   | 6,998,093   | 2 | 0 | 2 | 1 |
| Case 91 | 3 | 6,999,617   | 7,721,997   | 3 | 0 | 3 | 1 |
| Case 91 | 3 | 7,730,014   | 7,797,492   | 2 | 0 | 2 | 1 |
| Case 91 | 3 | 7,805,209   | 12,314,846  | 3 | 0 | 3 | 1 |
| Case 91 | 3 | 12,316,770  | 12,331,536  | 2 | 0 | 2 | 1 |
| Case 91 | 3 | 12,334,416  | 12,858,380  | 3 | 0 | 3 | 1 |
| Case 91 | 3 | 12,858,395  | 12,859,342  | 2 | 0 | 2 | 1 |
| Case 91 | 3 | 12,860,988  | 14,661,876  | 3 | 0 | 3 | 1 |
| Case 91 | 3 | 14,665,333  | 14,679,273  | 2 | 0 | 2 | 1 |
| Case 91 | 3 | 14,688,071  | 15,173,478  | 3 | 0 | 3 | 1 |
| Case 91 | 3 | 15,185,634  | 15,276,541  | 2 | 0 | 2 | 1 |
| Case 91 | 3 | 15,288,911  | 15,499,713  | 3 | 0 | 3 | 1 |
| Case 91 | 3 | 15,500,295  | 15,520,838  | 2 | 0 | 2 | 1 |
| Case 91 | 3 | 15,530,595  | 17,182,697  | 3 | 0 | 3 | 1 |
| Case 91 | 3 | 17,185,728  | 17,765,959  | 2 | 0 | 2 | 1 |
| Case 91 | 3 | 17,788,430  | 17,987,400  | 3 | 0 | 3 | 1 |
| Case 91 | 3 | 17,989,553  | 18,589,151  | 2 | 0 | 2 | 1 |
| Case 91 | 3 | 18,602,534  | 18,802,882  | 3 | 0 | 3 | 1 |
| Case 91 | 3 | 18,808,580  | 19,480,313  | 2 | 0 | 2 | 1 |
| Case 91 | 3 | 19,482,975  | 19,788,618  | 3 | 0 | 3 | 1 |
| Case 91 | 3 | 19,799,545  | 20,020,443  | 2 | 0 | 2 | 1 |
| Case 91 | 3 | 20,023,229  | 20,220,712  | 3 | 0 | 3 | 1 |
| Case 91 | 3 | 20,225,197  | 21,647,818  | 2 | 0 | 2 | 1 |
| Case 91 | 3 | 21,650,537  | 21,816,016  | 3 | 0 | 3 | 1 |
| Case 91 | 3 | 21,816,589  | 22,513,865  | 2 | 0 | 2 | 1 |
| Case 91 | 3 | 22,531,603  | 24,794,908  | 3 | 0 | 3 | 1 |
| Case 91 | 3 | 24,795,619  | 24,924,495  | 2 | 0 | 2 | 1 |
| Case 91 | 3 | 24,927,203  | 25,133,273  | 3 | 0 | 3 | 1 |
| Case 91 | 3 | 25,134,883  | 25,315,828  | 2 | 0 | 2 | 1 |
| Case 91 | 3 | 25,316,314  | 25,656,775  | 3 | 0 | 3 | 1 |
| Case 91 | 3 | 25,666,268  | 25,998,294  | 2 | 0 | 2 | 1 |
| Case 91 | 3 | 26,002,178  | 26,146,045  | 3 | 0 | 3 | 1 |
| Case 91 | 3 | 26,146,839  | 26,687,117  | 2 | 0 | 2 | 1 |
| Case 91 | 3 | 26,687,577  | 26,838,174  | 3 | 0 | 3 | 1 |
| Case 91 | 3 | 26,843,377  | 27,091,150  | 2 | 0 | 2 | 1 |
| Case 91 | 3 | 27,100,979  | 27,336,213  | 3 | 0 | 3 | 1 |
| Case 91 | 3 | 27,338,698  | 27,583,317  | 2 | 0 | 2 | 1 |

|         |   |            |            |   |   |   |   |
|---------|---|------------|------------|---|---|---|---|
| Case 91 | 3 | 27,588,090 | 27,614,316 | 3 | 0 | 3 | 1 |
| Case 91 | 3 | 27,615,419 | 27,638,500 | 2 | 0 | 2 | 1 |
| Case 91 | 3 | 27,639,142 | 27,782,163 | 3 | 0 | 3 | 1 |
| Case 91 | 3 | 27,782,360 | 28,163,157 | 2 | 0 | 2 | 1 |
| Case 91 | 3 | 28,180,249 | 28,426,786 | 3 | 0 | 3 | 1 |
| Case 91 | 3 | 28,427,029 | 28,690,589 | 2 | 0 | 2 | 1 |
| Case 91 | 3 | 28,699,121 | 29,013,915 | 3 | 0 | 3 | 1 |
| Case 91 | 3 | 29,016,439 | 29,357,063 | 2 | 0 | 2 | 1 |
| Case 91 | 3 | 29,357,140 | 29,538,444 | 3 | 0 | 3 | 1 |
| Case 91 | 3 | 29,540,243 | 29,876,233 | 2 | 0 | 2 | 1 |
| Case 91 | 3 | 29,877,387 | 30,745,941 | 3 | 0 | 3 | 1 |
| Case 91 | 3 | 30,746,868 | 30,772,496 | 2 | 0 | 2 | 1 |
| Case 91 | 3 | 30,774,786 | 31,652,978 | 3 | 0 | 3 | 1 |
| Case 91 | 3 | 31,656,614 | 31,712,393 | 2 | 0 | 2 | 1 |
| Case 91 | 3 | 31,714,174 | 33,444,286 | 3 | 0 | 3 | 1 |
| Case 91 | 3 | 33,453,135 | 33,745,827 | 2 | 0 | 2 | 1 |
| Case 91 | 3 | 33,767,207 | 34,538,558 | 3 | 0 | 3 | 1 |
| Case 91 | 3 | 34,542,396 | 35,447,320 | 2 | 0 | 2 | 1 |
| Case 91 | 3 | 35,457,227 | 35,577,952 | 3 | 0 | 3 | 1 |
| Case 91 | 3 | 35,580,968 | 36,267,529 | 2 | 0 | 2 | 1 |
| Case 91 | 3 | 36,270,289 | 39,852,825 | 3 | 0 | 3 | 1 |
| Case 91 | 3 | 39,862,052 | 39,973,774 | 2 | 0 | 2 | 1 |
| Case 91 | 3 | 39,975,119 | 41,810,220 | 3 | 0 | 3 | 1 |
| Case 91 | 3 | 41,822,054 | 41,973,462 | 2 | 0 | 2 | 1 |
| Case 91 | 3 | 41,985,152 | 43,622,656 | 3 | 0 | 3 | 1 |
| Case 91 | 3 | 43,627,341 | 43,753,322 | 2 | 0 | 2 | 1 |
| Case 91 | 3 | 43,755,473 | 44,309,620 | 3 | 0 | 3 | 1 |
| Case 91 | 3 | 44,345,521 | 44,461,904 | 2 | 0 | 2 | 1 |
| Case 91 | 3 | 44,465,137 | 44,762,403 | 3 | 0 | 3 | 1 |
| Case 91 | 3 | 44,762,748 | 44,795,238 | 2 | 0 | 2 | 1 |
| Case 91 | 3 | 44,798,608 | 46,005,882 | 3 | 0 | 3 | 1 |
| Case 91 | 3 | 46,005,885 | 46,010,179 | 2 | 0 | 2 | 1 |
| Case 91 | 3 | 46,010,194 | 46,721,662 | 3 | 0 | 3 | 1 |
| Case 91 | 3 | 46,721,988 | 46,753,976 | 2 | 0 | 2 | 1 |
| Case 91 | 3 | 46,754,470 | 47,032,777 | 3 | 0 | 3 | 1 |
| Case 91 | 3 | 47,033,113 | 47,044,168 | 2 | 0 | 2 | 1 |
| Case 91 | 3 | 47,044,679 | 47,452,339 | 3 | 0 | 3 | 1 |
| Case 91 | 3 | 47,452,572 | 47,575,568 | 2 | 0 | 2 | 1 |
| Case 91 | 3 | 47,582,724 | 48,658,918 | 3 | 0 | 3 | 1 |
| Case 91 | 3 | 48,658,921 | 48,659,119 | 2 | 0 | 2 | 1 |
| Case 91 | 3 | 48,659,182 | 49,831,032 | 3 | 0 | 3 | 1 |
| Case 91 | 3 | 49,831,237 | 49,843,505 | 2 | 0 | 2 | 1 |
| Case 91 | 3 | 49,843,568 | 50,154,597 | 3 | 0 | 3 | 1 |
| Case 91 | 3 | 50,157,235 | 50,228,558 | 2 | 0 | 2 | 1 |
| Case 91 | 3 | 50,229,241 | 51,985,664 | 3 | 0 | 3 | 1 |
| Case 91 | 3 | 51,990,315 | 52,021,422 | 2 | 0 | 2 | 1 |
| Case 91 | 3 | 52,021,614 | 54,928,174 | 3 | 0 | 3 | 1 |
| Case 91 | 3 | 54,928,327 | 55,089,374 | 2 | 0 | 2 | 1 |
| Case 91 | 3 | 55,091,151 | 55,808,202 | 3 | 0 | 3 | 1 |
| Case 91 | 3 | 55,811,863 | 55,911,137 | 2 | 0 | 2 | 1 |
| Case 91 | 3 | 55,912,786 | 57,407,327 | 3 | 0 | 3 | 1 |
| Case 91 | 3 | 57,407,357 | 57,898,906 | 2 | 0 | 2 | 1 |
| Case 91 | 3 | 57,898,980 | 59,000,763 | 3 | 0 | 3 | 1 |
| Case 91 | 3 | 59,029,189 | 59,357,910 | 2 | 0 | 2 | 1 |
| Case 91 | 3 | 59,358,190 | 59,475,736 | 3 | 0 | 3 | 1 |
| Case 91 | 3 | 59,481,280 | 59,539,911 | 2 | 0 | 2 | 1 |
| Case 91 | 3 | 59,541,974 | 59,772,460 | 3 | 0 | 3 | 1 |
| Case 91 | 3 | 59,781,217 | 59,877,988 | 2 | 0 | 2 | 1 |
| Case 91 | 3 | 59,878,365 | 59,920,912 | 0 | 0 | 0 | 0 |
| Case 91 | 3 | 59,921,786 | 60,034,194 | 3 | 0 | 3 | 1 |
| Case 91 | 3 | 60,034,455 | 60,364,830 | 2 | 0 | 2 | 1 |

|         |   |             |             |   |   |   |   |
|---------|---|-------------|-------------|---|---|---|---|
| Case 91 | 3 | 60,370,362  | 60,374,028  | 3 | 0 | 3 | 1 |
| Case 91 | 3 | 60,379,253  | 60,379,450  | 2 | 2 | 4 | 0 |
| Case 91 | 3 | 60,382,023  | 60,647,540  | 1 | 0 | 1 | 0 |
| Case 91 | 3 | 60,655,448  | 60,655,448  | 2 | 2 | 4 | 0 |
| Case 91 | 3 | 60,657,068  | 60,708,889  | 3 | 0 | 3 | 1 |
| Case 91 | 3 | 60,711,659  | 61,096,082  | 2 | 0 | 2 | 1 |
| Case 91 | 3 | 61,098,641  | 62,525,450  | 3 | 0 | 3 | 1 |
| Case 91 | 3 | 62,526,657  | 62,615,298  | 2 | 0 | 2 | 1 |
| Case 91 | 3 | 62,617,576  | 62,970,590  | 3 | 0 | 3 | 1 |
| Case 91 | 3 | 62,975,224  | 63,073,556  | 2 | 0 | 2 | 1 |
| Case 91 | 3 | 63,074,219  | 64,126,596  | 3 | 0 | 3 | 1 |
| Case 91 | 3 | 64,127,088  | 64,142,981  | 2 | 0 | 2 | 1 |
| Case 91 | 3 | 64,142,993  | 65,201,343  | 3 | 0 | 3 | 1 |
| Case 91 | 3 | 65,202,420  | 65,262,507  | 2 | 0 | 2 | 1 |
| Case 91 | 3 | 65,266,072  | 65,489,584  | 3 | 0 | 3 | 1 |
| Case 91 | 3 | 65,493,125  | 65,536,289  | 2 | 0 | 2 | 1 |
| Case 91 | 3 | 65,543,313  | 68,338,445  | 3 | 0 | 3 | 1 |
| Case 91 | 3 | 68,339,327  | 68,373,756  | 2 | 0 | 2 | 1 |
| Case 91 | 3 | 68,374,110  | 68,779,816  | 3 | 0 | 3 | 1 |
| Case 91 | 3 | 68,780,703  | 68,872,978  | 2 | 0 | 2 | 1 |
| Case 91 | 3 | 68,873,857  | 69,073,223  | 3 | 0 | 3 | 1 |
| Case 91 | 3 | 69,074,781  | 69,103,000  | 2 | 0 | 2 | 1 |
| Case 91 | 3 | 69,112,288  | 70,014,230  | 3 | 0 | 3 | 1 |
| Case 91 | 3 | 70,014,391  | 70,304,462  | 2 | 0 | 2 | 1 |
| Case 91 | 3 | 70,306,417  | 72,705,741  | 3 | 0 | 3 | 1 |
| Case 91 | 3 | 72,709,390  | 72,868,234  | 2 | 0 | 2 | 1 |
| Case 91 | 3 | 72,873,586  | 74,151,374  | 3 | 0 | 3 | 1 |
| Case 91 | 3 | 74,155,133  | 74,332,837  | 2 | 0 | 2 | 1 |
| Case 91 | 3 | 74,334,458  | 74,352,388  | 3 | 0 | 3 | 1 |
| Case 91 | 3 | 74,358,189  | 75,786,288  | 2 | 0 | 2 | 1 |
| Case 91 | 3 | 75,786,421  | 76,014,622  | 3 | 0 | 3 | 1 |
| Case 91 | 3 | 76,024,339  | 76,114,576  | 2 | 0 | 2 | 1 |
| Case 91 | 3 | 76,118,545  | 90,442,925  | 4 | 0 | 4 | 1 |
| Case 91 | 3 | 93,537,290  | 197,838,262 | 4 | 0 | 4 | 1 |
| Case 91 | 4 | 71,566      | 44,465,870  | 2 | 2 | 4 | 0 |
| Case 91 | 4 | 44,466,809  | 44,528,928  | 2 | 1 | 3 | 0 |
| Case 91 | 4 | 44,530,236  | 49,620,898  | 2 | 2 | 4 | 0 |
| Case 91 | 4 | 52,697,856  | 178,203,463 | 2 | 2 | 4 | 0 |
| Case 91 | 4 | 178,206,711 | 178,214,726 | 1 | 0 | 1 | 0 |
| Case 91 | 4 | 178,221,198 | 190,963,766 | 2 | 2 | 4 | 0 |
| Case 91 | 5 | 38,139      | 32,101,400  | 2 | 2 | 4 | 0 |
| Case 91 | 5 | 32,107,381  | 32,159,517  | 4 | 2 | 6 | 0 |
| Case 91 | 5 | 32,169,547  | 46,399,093  | 2 | 2 | 4 | 0 |
| Case 91 | 5 | 49,457,282  | 139,931,384 | 2 | 2 | 4 | 0 |
| Case 91 | 5 | 139,931,607 | 139,931,653 | 2 | 1 | 3 | 0 |
| Case 91 | 5 | 139,931,655 | 180,693,127 | 2 | 2 | 4 | 0 |
| Case 91 | 6 | 108,666     | 1,152,071   | 3 | 0 | 3 | 1 |
| Case 91 | 6 | 1,161,892   | 1,223,075   | 2 | 0 | 2 | 1 |
| Case 91 | 6 | 1,223,093   | 1,716,710   | 3 | 0 | 3 | 1 |
| Case 91 | 6 | 1,721,914   | 2,037,632   | 2 | 0 | 2 | 1 |
| Case 91 | 6 | 2,039,027   | 3,979,751   | 3 | 0 | 3 | 1 |
| Case 91 | 6 | 3,981,940   | 4,013,741   | 2 | 0 | 2 | 1 |
| Case 91 | 6 | 4,016,348   | 4,986,250   | 3 | 0 | 3 | 1 |
| Case 91 | 6 | 4,991,024   | 5,080,264   | 2 | 0 | 2 | 1 |
| Case 91 | 6 | 5,080,904   | 7,357,849   | 3 | 0 | 3 | 1 |
| Case 91 | 6 | 7,365,727   | 7,379,149   | 2 | 0 | 2 | 1 |
| Case 91 | 6 | 7,380,267   | 8,378,609   | 3 | 0 | 3 | 1 |
| Case 91 | 6 | 8,379,684   | 9,466,991   | 2 | 0 | 2 | 1 |
| Case 91 | 6 | 9,469,238   | 9,842,319   | 3 | 0 | 3 | 1 |
| Case 91 | 6 | 9,846,872   | 10,184,724  | 2 | 0 | 2 | 1 |
| Case 91 | 6 | 10,186,253  | 15,538,436  | 3 | 0 | 3 | 1 |

|         |   |            |            |   |   |   |   |
|---------|---|------------|------------|---|---|---|---|
| Case 91 | 6 | 15,538,685 | 15,656,155 | 2 | 0 | 2 | 1 |
| Case 91 | 6 | 15,658,905 | 17,626,144 | 3 | 0 | 3 | 1 |
| Case 91 | 6 | 17,626,299 | 17,635,050 | 2 | 0 | 2 | 1 |
| Case 91 | 6 | 17,637,386 | 19,045,560 | 3 | 0 | 3 | 1 |
| Case 91 | 6 | 19,046,730 | 19,844,355 | 2 | 0 | 2 | 1 |
| Case 91 | 6 | 19,848,673 | 20,488,234 | 3 | 0 | 3 | 1 |
| Case 91 | 6 | 20,488,419 | 20,640,316 | 2 | 0 | 2 | 1 |
| Case 91 | 6 | 20,647,660 | 20,954,826 | 3 | 0 | 3 | 1 |
| Case 91 | 6 | 20,955,332 | 21,084,430 | 2 | 0 | 2 | 1 |
| Case 91 | 6 | 21,086,047 | 21,911,852 | 3 | 0 | 3 | 1 |
| Case 91 | 6 | 21,912,632 | 21,972,800 | 2 | 0 | 2 | 1 |
| Case 91 | 6 | 21,982,253 | 22,117,435 | 3 | 0 | 3 | 1 |
| Case 91 | 6 | 22,122,568 | 22,274,766 | 2 | 0 | 2 | 1 |
| Case 91 | 6 | 22,280,214 | 22,390,618 | 3 | 0 | 3 | 1 |
| Case 91 | 6 | 22,391,406 | 22,515,654 | 2 | 0 | 2 | 1 |
| Case 91 | 6 | 22,516,569 | 22,569,968 | 3 | 0 | 3 | 1 |
| Case 91 | 6 | 22,570,064 | 22,738,731 | 2 | 0 | 2 | 1 |
| Case 91 | 6 | 22,739,169 | 22,831,647 | 3 | 0 | 3 | 1 |
| Case 91 | 6 | 22,838,984 | 22,999,042 | 2 | 0 | 2 | 1 |
| Case 91 | 6 | 23,006,527 | 23,108,561 | 3 | 0 | 3 | 1 |
| Case 91 | 6 | 23,109,522 | 23,554,642 | 2 | 0 | 2 | 1 |
| Case 91 | 6 | 23,556,224 | 23,640,863 | 3 | 0 | 3 | 1 |
| Case 91 | 6 | 23,645,529 | 23,774,487 | 2 | 0 | 2 | 1 |
| Case 91 | 6 | 23,775,595 | 23,796,356 | 3 | 0 | 3 | 1 |
| Case 91 | 6 | 23,798,295 | 23,947,613 | 2 | 0 | 2 | 1 |
| Case 91 | 6 | 23,951,514 | 24,533,806 | 3 | 0 | 3 | 1 |
| Case 91 | 6 | 24,533,938 | 24,551,729 | 2 | 0 | 2 | 1 |
| Case 91 | 6 | 24,554,762 | 24,596,420 | 3 | 0 | 3 | 1 |
| Case 91 | 6 | 24,596,433 | 24,932,145 | 2 | 0 | 2 | 1 |
| Case 91 | 6 | 24,938,277 | 26,056,321 | 3 | 0 | 3 | 1 |
| Case 91 | 6 | 26,056,549 | 26,087,736 | 2 | 0 | 2 | 1 |
| Case 91 | 6 | 26,088,890 | 26,127,184 | 3 | 0 | 3 | 1 |
| Case 91 | 6 | 26,128,446 | 26,198,916 | 2 | 0 | 2 | 1 |
| Case 91 | 6 | 26,199,014 | 26,608,325 | 3 | 0 | 3 | 1 |
| Case 91 | 6 | 26,612,363 | 26,665,835 | 2 | 0 | 2 | 1 |
| Case 91 | 6 | 26,668,384 | 27,312,078 | 3 | 0 | 3 | 1 |
| Case 91 | 6 | 27,318,836 | 27,367,824 | 2 | 0 | 2 | 1 |
| Case 91 | 6 | 27,367,887 | 27,690,174 | 3 | 0 | 3 | 1 |
| Case 91 | 6 | 27,690,905 | 27,987,776 | 2 | 0 | 2 | 1 |
| Case 91 | 6 | 27,998,258 | 28,137,730 | 3 | 0 | 3 | 1 |
| Case 91 | 6 | 28,140,134 | 28,191,859 | 2 | 0 | 2 | 1 |
| Case 91 | 6 | 28,193,190 | 28,203,300 | 3 | 0 | 3 | 1 |
| Case 91 | 6 | 28,204,793 | 28,223,191 | 2 | 0 | 2 | 1 |
| Case 91 | 6 | 28,223,680 | 28,367,768 | 3 | 0 | 3 | 1 |
| Case 91 | 6 | 28,370,246 | 28,444,165 | 2 | 0 | 2 | 1 |
| Case 91 | 6 | 28,447,915 | 28,890,219 | 3 | 0 | 3 | 1 |
| Case 91 | 6 | 28,891,176 | 28,904,162 | 2 | 0 | 2 | 1 |
| Case 91 | 6 | 28,905,791 | 29,275,298 | 3 | 0 | 3 | 1 |
| Case 91 | 6 | 29,275,380 | 29,341,449 | 2 | 0 | 2 | 1 |
| Case 91 | 6 | 29,342,227 | 29,398,000 | 3 | 0 | 3 | 1 |
| Case 91 | 6 | 29,398,815 | 29,407,378 | 2 | 0 | 2 | 1 |
| Case 91 | 6 | 29,407,800 | 29,492,563 | 3 | 0 | 3 | 1 |
| Case 91 | 6 | 29,494,897 | 29,501,422 | 2 | 0 | 2 | 1 |
| Case 91 | 6 | 29,501,514 | 29,812,030 | 3 | 0 | 3 | 1 |
| Case 91 | 6 | 29,812,471 | 29,817,106 | 2 | 0 | 2 | 1 |
| Case 91 | 6 | 29,817,244 | 32,357,715 | 3 | 0 | 3 | 1 |
| Case 91 | 6 | 32,358,270 | 32,364,214 | 2 | 0 | 2 | 1 |
| Case 91 | 6 | 32,365,580 | 32,414,273 | 3 | 0 | 3 | 1 |
| Case 91 | 6 | 32,415,975 | 32,424,380 | 2 | 0 | 2 | 1 |
| Case 91 | 6 | 32,424,882 | 32,582,075 | 3 | 0 | 3 | 1 |
| Case 91 | 6 | 32,582,796 | 32,592,737 | 2 | 0 | 2 | 1 |

|         |   |            |            |   |   |   |   |
|---------|---|------------|------------|---|---|---|---|
| Case 91 | 6 | 32,592,851 | 32,766,854 | 3 | 0 | 3 | 1 |
| Case 91 | 6 | 32,767,091 | 32,779,996 | 2 | 0 | 2 | 1 |
| Case 91 | 6 | 32,780,317 | 32,999,330 | 3 | 0 | 3 | 1 |
| Case 91 | 6 | 33,001,735 | 33,014,318 | 2 | 0 | 2 | 1 |
| Case 91 | 6 | 33,015,419 | 38,790,796 | 3 | 0 | 3 | 1 |
| Case 91 | 6 | 38,791,393 | 38,902,470 | 2 | 0 | 2 | 1 |
| Case 91 | 6 | 38,903,220 | 41,001,644 | 3 | 0 | 3 | 1 |
| Case 91 | 6 | 41,001,660 | 41,016,952 | 2 | 0 | 2 | 1 |
| Case 91 | 6 | 41,020,510 | 41,738,845 | 3 | 0 | 3 | 1 |
| Case 91 | 6 | 41,738,889 | 41,754,013 | 2 | 0 | 2 | 1 |
| Case 91 | 6 | 41,754,576 | 42,467,898 | 3 | 0 | 3 | 1 |
| Case 91 | 6 | 42,470,474 | 42,604,917 | 2 | 0 | 2 | 1 |
| Case 91 | 6 | 42,609,352 | 43,063,516 | 3 | 0 | 3 | 1 |
| Case 91 | 6 | 43,065,329 | 43,128,852 | 2 | 0 | 2 | 1 |
| Case 91 | 6 | 43,129,986 | 44,863,106 | 3 | 0 | 3 | 1 |
| Case 91 | 6 | 44,875,097 | 45,349,497 | 2 | 0 | 2 | 1 |
| Case 91 | 6 | 45,349,509 | 46,054,285 | 3 | 0 | 3 | 1 |
| Case 91 | 6 | 46,058,361 | 46,135,984 | 2 | 0 | 2 | 1 |
| Case 91 | 6 | 46,142,439 | 46,553,670 | 3 | 0 | 3 | 1 |
| Case 91 | 6 | 46,554,836 | 46,597,508 | 2 | 0 | 2 | 1 |
| Case 91 | 6 | 46,597,608 | 46,657,760 | 3 | 0 | 3 | 1 |
| Case 91 | 6 | 46,657,792 | 46,659,849 | 2 | 0 | 2 | 1 |
| Case 91 | 6 | 46,659,884 | 46,660,657 | 3 | 0 | 3 | 1 |
| Case 91 | 6 | 46,660,963 | 46,672,394 | 2 | 0 | 2 | 1 |
| Case 91 | 6 | 46,672,913 | 48,288,536 | 3 | 0 | 3 | 1 |
| Case 91 | 6 | 48,289,514 | 49,740,169 | 2 | 0 | 2 | 1 |
| Case 91 | 6 | 49,744,632 | 49,771,994 | 3 | 0 | 3 | 1 |
| Case 91 | 6 | 49,778,621 | 50,727,940 | 2 | 0 | 2 | 1 |
| Case 91 | 6 | 50,740,488 | 50,966,474 | 3 | 0 | 3 | 1 |
| Case 91 | 6 | 50,967,007 | 51,513,918 | 2 | 0 | 2 | 1 |
| Case 91 | 6 | 51,514,462 | 51,524,258 | 3 | 0 | 3 | 1 |
| Case 91 | 6 | 51,524,339 | 51,612,837 | 2 | 0 | 2 | 1 |
| Case 91 | 6 | 51,612,838 | 53,971,401 | 3 | 0 | 3 | 1 |
| Case 91 | 6 | 53,975,913 | 54,164,079 | 2 | 0 | 2 | 1 |
| Case 91 | 6 | 54,164,397 | 54,433,329 | 3 | 0 | 3 | 1 |
| Case 91 | 6 | 54,438,426 | 54,489,220 | 2 | 0 | 2 | 1 |
| Case 91 | 6 | 54,491,621 | 55,084,697 | 3 | 0 | 3 | 1 |
| Case 91 | 6 | 55,087,410 | 55,214,932 | 2 | 0 | 2 | 1 |
| Case 91 | 6 | 55,216,005 | 55,448,610 | 3 | 0 | 3 | 1 |
| Case 91 | 6 | 55,456,080 | 56,035,909 | 2 | 0 | 2 | 1 |
| Case 91 | 6 | 56,044,578 | 56,204,017 | 3 | 0 | 3 | 1 |
| Case 91 | 6 | 56,204,751 | 56,271,981 | 2 | 0 | 2 | 1 |
| Case 91 | 6 | 56,272,686 | 56,879,990 | 3 | 0 | 3 | 1 |
| Case 91 | 6 | 56,880,051 | 57,069,606 | 2 | 0 | 2 | 1 |
| Case 91 | 6 | 57,070,684 | 57,540,722 | 3 | 0 | 3 | 1 |
| Case 91 | 6 | 57,561,493 | 58,752,089 | 2 | 0 | 2 | 1 |
| Case 91 | 6 | 61,891,118 | 64,121,251 | 2 | 0 | 2 | 1 |
| Case 91 | 6 | 64,136,886 | 64,395,582 | 3 | 0 | 3 | 1 |
| Case 91 | 6 | 64,397,433 | 70,836,769 | 2 | 0 | 2 | 1 |
| Case 91 | 6 | 70,839,610 | 71,123,747 | 3 | 0 | 3 | 1 |
| Case 91 | 6 | 71,162,209 | 71,329,265 | 2 | 0 | 2 | 1 |
| Case 91 | 6 | 71,330,911 | 71,751,997 | 3 | 0 | 3 | 1 |
| Case 91 | 6 | 71,752,093 | 71,963,483 | 2 | 0 | 2 | 1 |
| Case 91 | 6 | 71,968,427 | 72,479,263 | 3 | 0 | 3 | 1 |
| Case 91 | 6 | 72,481,492 | 72,624,622 | 2 | 0 | 2 | 1 |
| Case 91 | 6 | 72,627,446 | 72,845,455 | 3 | 0 | 3 | 1 |
| Case 91 | 6 | 72,851,032 | 73,663,745 | 2 | 0 | 2 | 1 |
| Case 91 | 6 | 73,664,251 | 74,126,084 | 3 | 0 | 3 | 1 |
| Case 91 | 6 | 74,126,941 | 74,171,753 | 2 | 0 | 2 | 1 |
| Case 91 | 6 | 74,176,061 | 74,710,860 | 3 | 0 | 3 | 1 |
| Case 91 | 6 | 74,725,759 | 75,843,010 | 2 | 0 | 2 | 1 |



|         |   |             |             |   |   |   |   |
|---------|---|-------------|-------------|---|---|---|---|
| Case 91 | 6 | 75,843,360  | 76,228,952  | 3 | 0 | 3 | 1 |
| Case 91 | 6 | 76,236,061  | 76,450,023  | 2 | 0 | 2 | 1 |
| Case 91 | 6 | 76,458,378  | 76,698,468  | 3 | 0 | 3 | 1 |
| Case 91 | 6 | 76,710,341  | 76,960,326  | 2 | 0 | 2 | 1 |
| Case 91 | 6 | 76,969,607  | 77,354,191  | 3 | 0 | 3 | 1 |
| Case 91 | 6 | 77,356,681  | 77,391,826  | 2 | 0 | 2 | 1 |
| Case 91 | 6 | 77,393,108  | 77,606,341  | 3 | 0 | 3 | 1 |
| Case 91 | 6 | 77,608,445  | 78,149,229  | 2 | 0 | 2 | 1 |
| Case 91 | 6 | 78,160,933  | 78,236,296  | 3 | 0 | 3 | 1 |
| Case 91 | 6 | 78,241,057  | 79,823,541  | 2 | 0 | 2 | 1 |
| Case 91 | 6 | 79,826,148  | 80,002,510  | 3 | 0 | 3 | 1 |
| Case 91 | 6 | 80,010,402  | 80,135,831  | 2 | 0 | 2 | 1 |
| Case 91 | 6 | 80,136,327  | 80,495,689  | 3 | 0 | 3 | 1 |
| Case 91 | 6 | 80,501,763  | 80,765,111  | 2 | 0 | 2 | 1 |
| Case 91 | 6 | 80,775,330  | 80,860,072  | 3 | 0 | 3 | 1 |
| Case 91 | 6 | 80,878,662  | 81,153,486  | 2 | 0 | 2 | 1 |
| Case 91 | 6 | 81,159,931  | 81,274,336  | 3 | 0 | 3 | 1 |
| Case 91 | 6 | 81,276,112  | 81,365,907  | 2 | 0 | 2 | 1 |
| Case 91 | 6 | 81,366,484  | 81,689,287  | 3 | 0 | 3 | 1 |
| Case 91 | 6 | 81,698,459  | 81,960,107  | 2 | 0 | 2 | 1 |
| Case 91 | 6 | 81,985,033  | 82,857,374  | 3 | 0 | 3 | 1 |
| Case 91 | 6 | 82,857,479  | 83,284,573  | 2 | 0 | 2 | 1 |
| Case 91 | 6 | 83,284,952  | 83,847,590  | 3 | 0 | 3 | 1 |
| Case 91 | 6 | 83,847,699  | 84,169,965  | 2 | 0 | 2 | 1 |
| Case 91 | 6 | 84,174,401  | 84,250,330  | 3 | 0 | 3 | 1 |
| Case 91 | 6 | 84,264,333  | 85,521,035  | 2 | 0 | 2 | 1 |
| Case 91 | 6 | 85,523,135  | 86,203,585  | 3 | 0 | 3 | 1 |
| Case 91 | 6 | 86,203,963  | 86,269,039  | 2 | 0 | 2 | 1 |
| Case 91 | 6 | 86,279,737  | 86,691,940  | 3 | 0 | 3 | 1 |
| Case 91 | 6 | 86,697,586  | 87,856,003  | 2 | 0 | 2 | 1 |
| Case 91 | 6 | 87,864,745  | 88,729,447  | 3 | 0 | 3 | 1 |
| Case 91 | 6 | 88,731,608  | 88,843,390  | 2 | 0 | 2 | 1 |
| Case 91 | 6 | 88,845,949  | 90,340,446  | 3 | 0 | 3 | 1 |
| Case 91 | 6 | 90,340,454  | 90,422,980  | 2 | 0 | 2 | 1 |
| Case 91 | 6 | 90,424,391  | 91,376,578  | 3 | 0 | 3 | 1 |
| Case 91 | 6 | 91,385,628  | 91,564,260  | 2 | 0 | 2 | 1 |
| Case 91 | 6 | 91,565,841  | 91,670,249  | 3 | 0 | 3 | 1 |
| Case 91 | 6 | 91,675,072  | 93,543,673  | 2 | 0 | 2 | 1 |
| Case 91 | 6 | 93,545,700  | 93,584,284  | 3 | 0 | 3 | 1 |
| Case 91 | 6 | 93,587,834  | 96,622,433  | 2 | 0 | 2 | 1 |
| Case 91 | 6 | 96,625,462  | 96,796,050  | 3 | 0 | 3 | 1 |
| Case 91 | 6 | 96,796,630  | 97,208,361  | 2 | 0 | 2 | 1 |
| Case 91 | 6 | 97,209,235  | 97,459,945  | 3 | 0 | 3 | 1 |
| Case 91 | 6 | 97,461,663  | 98,169,324  | 2 | 0 | 2 | 1 |
| Case 91 | 6 | 98,169,886  | 98,331,498  | 3 | 0 | 3 | 1 |
| Case 91 | 6 | 98,332,567  | 99,365,582  | 2 | 0 | 2 | 1 |
| Case 91 | 6 | 99,374,400  | 99,803,269  | 3 | 0 | 3 | 1 |
| Case 91 | 6 | 99,804,157  | 99,912,594  | 2 | 0 | 2 | 1 |
| Case 91 | 6 | 99,913,003  | 100,321,734 | 3 | 0 | 3 | 1 |
| Case 91 | 6 | 100,324,464 | 100,674,799 | 2 | 0 | 2 | 1 |
| Case 91 | 6 | 100,676,593 | 100,888,625 | 3 | 0 | 3 | 1 |
| Case 91 | 6 | 100,894,587 | 104,740,181 | 2 | 0 | 2 | 1 |
| Case 91 | 6 | 104,742,765 | 105,171,129 | 3 | 0 | 3 | 1 |
| Case 91 | 6 | 105,173,534 | 105,352,035 | 2 | 0 | 2 | 1 |
| Case 91 | 6 | 105,378,954 | 108,317,269 | 3 | 0 | 3 | 1 |
| Case 91 | 6 | 108,321,035 | 108,713,146 | 2 | 0 | 2 | 1 |
| Case 91 | 6 | 108,739,757 | 109,837,133 | 3 | 0 | 3 | 1 |
| Case 91 | 6 | 109,837,229 | 110,062,679 | 2 | 0 | 2 | 1 |
| Case 91 | 6 | 110,062,705 | 110,424,341 | 3 | 0 | 3 | 1 |
| Case 91 | 6 | 110,424,599 | 110,714,205 | 2 | 0 | 2 | 1 |
| Case 91 | 6 | 110,714,206 | 110,932,682 | 3 | 0 | 3 | 1 |

|         |   |             |             |   |   |   |   |
|---------|---|-------------|-------------|---|---|---|---|
| Case 91 | 6 | 110,936,144 | 111,374,253 | 2 | 0 | 2 | 1 |
| Case 91 | 6 | 111,378,729 | 111,696,756 | 3 | 0 | 3 | 1 |
| Case 91 | 6 | 111,696,850 | 111,784,919 | 2 | 0 | 2 | 1 |
| Case 91 | 6 | 111,809,796 | 112,529,727 | 3 | 0 | 3 | 1 |
| Case 91 | 6 | 112,531,660 | 112,668,922 | 2 | 0 | 2 | 1 |
| Case 91 | 6 | 112,670,796 | 112,915,138 | 3 | 0 | 3 | 1 |
| Case 91 | 6 | 112,920,882 | 113,712,036 | 2 | 0 | 2 | 1 |
| Case 91 | 6 | 113,712,795 | 114,553,296 | 3 | 0 | 3 | 1 |
| Case 91 | 6 | 114,553,493 | 116,014,608 | 2 | 0 | 2 | 1 |
| Case 91 | 6 | 116,023,522 | 116,441,668 | 3 | 0 | 3 | 1 |
| Case 91 | 6 | 116,441,915 | 116,566,845 | 2 | 0 | 2 | 1 |
| Case 91 | 6 | 116,570,488 | 116,772,664 | 3 | 0 | 3 | 1 |
| Case 91 | 6 | 116,775,633 | 116,833,259 | 2 | 0 | 2 | 1 |
| Case 91 | 6 | 116,834,007 | 116,972,117 | 3 | 0 | 3 | 1 |
| Case 91 | 6 | 116,972,865 | 117,113,773 | 2 | 0 | 2 | 1 |
| Case 91 | 6 | 117,113,774 | 117,220,071 | 3 | 0 | 3 | 1 |
| Case 91 | 6 | 117,232,111 | 117,532,372 | 2 | 0 | 2 | 1 |
| Case 91 | 6 | 117,536,229 | 117,609,683 | 3 | 0 | 3 | 1 |
| Case 91 | 6 | 117,609,714 | 117,704,649 | 2 | 0 | 2 | 1 |
| Case 91 | 6 | 117,707,022 | 118,372,057 | 3 | 0 | 3 | 1 |
| Case 91 | 6 | 118,379,187 | 118,886,886 | 2 | 0 | 2 | 1 |
| Case 91 | 6 | 118,886,955 | 119,819,043 | 3 | 0 | 3 | 1 |
| Case 91 | 6 | 119,820,198 | 121,756,088 | 2 | 0 | 2 | 1 |
| Case 91 | 6 | 121,758,907 | 121,860,207 | 3 | 0 | 3 | 1 |
| Case 91 | 6 | 121,860,377 | 124,023,675 | 2 | 0 | 2 | 1 |
| Case 91 | 6 | 124,029,779 | 124,163,015 | 3 | 0 | 3 | 1 |
| Case 91 | 6 | 124,166,282 | 124,805,874 | 2 | 0 | 2 | 1 |
| Case 91 | 6 | 124,807,814 | 124,887,359 | 3 | 0 | 3 | 1 |
| Case 91 | 6 | 124,889,636 | 124,907,009 | 2 | 0 | 2 | 1 |
| Case 91 | 6 | 124,909,841 | 124,979,689 | 3 | 0 | 3 | 1 |
| Case 91 | 6 | 124,980,834 | 125,107,056 | 2 | 0 | 2 | 1 |
| Case 91 | 6 | 125,108,969 | 125,502,382 | 3 | 0 | 3 | 1 |
| Case 91 | 6 | 125,505,326 | 125,569,863 | 2 | 0 | 2 | 1 |
| Case 91 | 6 | 125,572,026 | 127,392,977 | 3 | 0 | 3 | 1 |
| Case 91 | 6 | 127,398,595 | 127,583,408 | 2 | 0 | 2 | 1 |
| Case 91 | 6 | 127,587,086 | 128,411,109 | 3 | 0 | 3 | 1 |
| Case 91 | 6 | 128,411,176 | 128,795,887 | 2 | 0 | 2 | 1 |
| Case 91 | 6 | 128,813,085 | 129,605,056 | 3 | 0 | 3 | 1 |
| Case 91 | 6 | 129,609,124 | 129,702,793 | 2 | 0 | 2 | 1 |
| Case 91 | 6 | 129,704,328 | 132,167,977 | 3 | 0 | 3 | 1 |
| Case 91 | 6 | 132,168,997 | 132,204,839 | 2 | 0 | 2 | 1 |
| Case 91 | 6 | 132,206,079 | 133,237,557 | 3 | 0 | 3 | 1 |
| Case 91 | 6 | 133,242,963 | 133,396,480 | 2 | 0 | 2 | 1 |
| Case 91 | 6 | 133,408,229 | 133,578,733 | 3 | 0 | 3 | 1 |
| Case 91 | 6 | 133,586,425 | 133,621,996 | 2 | 0 | 2 | 1 |
| Case 91 | 6 | 133,624,199 | 133,732,404 | 3 | 0 | 3 | 1 |
| Case 91 | 6 | 133,732,908 | 133,776,122 | 2 | 0 | 2 | 1 |
| Case 91 | 6 | 133,789,728 | 139,141,137 | 3 | 0 | 3 | 1 |
| Case 91 | 6 | 139,142,909 | 139,232,443 | 2 | 0 | 2 | 1 |
| Case 91 | 6 | 139,233,903 | 139,487,936 | 3 | 0 | 3 | 1 |
| Case 91 | 6 | 139,495,658 | 139,563,937 | 2 | 0 | 2 | 1 |
| Case 91 | 6 | 139,563,947 | 140,227,929 | 3 | 0 | 3 | 1 |
| Case 91 | 6 | 140,241,272 | 142,396,884 | 2 | 0 | 2 | 1 |
| Case 91 | 6 | 142,396,939 | 142,691,362 | 3 | 0 | 3 | 1 |
| Case 91 | 6 | 142,691,549 | 142,853,486 | 2 | 0 | 2 | 1 |
| Case 91 | 6 | 142,879,589 | 144,765,462 | 3 | 0 | 3 | 1 |
| Case 91 | 6 | 144,765,490 | 145,187,154 | 2 | 0 | 2 | 1 |
| Case 91 | 6 | 145,199,259 | 146,145,678 | 3 | 0 | 3 | 1 |
| Case 91 | 6 | 146,204,066 | 146,248,241 | 2 | 0 | 2 | 1 |
| Case 91 | 6 | 146,256,435 | 146,337,547 | 3 | 0 | 3 | 1 |
| Case 91 | 6 | 146,368,041 | 147,175,178 | 2 | 0 | 2 | 1 |

|         |   |             |             |   |   |   |   |
|---------|---|-------------|-------------|---|---|---|---|
| Case 91 | 6 | 147,178,335 | 147,539,165 | 3 | 0 | 3 | 1 |
| Case 91 | 6 | 147,543,680 | 147,813,402 | 2 | 0 | 2 | 1 |
| Case 91 | 6 | 147,814,584 | 148,045,181 | 3 | 0 | 3 | 1 |
| Case 91 | 6 | 148,048,684 | 148,207,211 | 2 | 0 | 2 | 1 |
| Case 91 | 6 | 148,207,621 | 148,425,858 | 3 | 0 | 3 | 1 |
| Case 91 | 6 | 148,426,922 | 148,470,854 | 2 | 0 | 2 | 1 |
| Case 91 | 6 | 148,471,747 | 148,565,442 | 3 | 0 | 3 | 1 |
| Case 91 | 6 | 148,567,159 | 148,682,423 | 2 | 0 | 2 | 1 |
| Case 91 | 6 | 148,690,764 | 148,897,510 | 3 | 0 | 3 | 1 |
| Case 91 | 6 | 148,897,782 | 149,080,301 | 2 | 0 | 2 | 1 |
| Case 91 | 6 | 149,082,853 | 149,418,310 | 3 | 0 | 3 | 1 |
| Case 91 | 6 | 149,423,228 | 149,504,792 | 2 | 0 | 2 | 1 |
| Case 91 | 6 | 149,513,519 | 151,868,736 | 3 | 0 | 3 | 1 |
| Case 91 | 6 | 151,868,835 | 151,907,127 | 2 | 0 | 2 | 1 |
| Case 91 | 6 | 151,914,113 | 152,065,886 | 3 | 0 | 3 | 1 |
| Case 91 | 6 | 152,068,364 | 152,332,825 | 2 | 0 | 2 | 1 |
| Case 91 | 6 | 152,332,868 | 152,487,830 | 3 | 0 | 3 | 1 |
| Case 91 | 6 | 152,487,926 | 152,651,729 | 2 | 0 | 2 | 1 |
| Case 91 | 6 | 152,651,911 | 152,697,706 | 3 | 0 | 3 | 1 |
| Case 91 | 6 | 152,697,940 | 153,057,767 | 2 | 0 | 2 | 1 |
| Case 91 | 6 | 153,062,947 | 153,528,141 | 3 | 0 | 3 | 1 |
| Case 91 | 6 | 153,529,163 | 153,855,165 | 2 | 0 | 2 | 1 |
| Case 91 | 6 | 153,857,936 | 154,000,377 | 3 | 0 | 3 | 1 |
| Case 91 | 6 | 154,005,563 | 154,360,508 | 2 | 0 | 2 | 1 |
| Case 91 | 6 | 154,360,569 | 155,872,642 | 3 | 0 | 3 | 1 |
| Case 91 | 6 | 155,872,975 | 155,981,520 | 2 | 0 | 2 | 1 |
| Case 91 | 6 | 155,982,996 | 160,570,172 | 3 | 0 | 3 | 1 |
| Case 91 | 6 | 160,570,624 | 160,600,590 | 2 | 0 | 2 | 1 |
| Case 91 | 6 | 160,610,124 | 161,944,019 | 3 | 0 | 3 | 1 |
| Case 91 | 6 | 161,948,991 | 162,081,478 | 2 | 0 | 2 | 1 |
| Case 91 | 6 | 162,081,763 | 162,283,824 | 3 | 0 | 3 | 1 |
| Case 91 | 6 | 162,288,538 | 162,530,070 | 2 | 0 | 2 | 1 |
| Case 91 | 6 | 162,530,432 | 162,690,022 | 3 | 0 | 3 | 1 |
| Case 91 | 6 | 162,690,634 | 162,886,686 | 2 | 0 | 2 | 1 |
| Case 91 | 6 | 162,888,522 | 162,962,828 | 3 | 0 | 3 | 1 |
| Case 91 | 6 | 162,966,431 | 163,710,391 | 2 | 0 | 2 | 1 |
| Case 91 | 6 | 163,711,677 | 163,783,291 | 3 | 0 | 3 | 1 |
| Case 91 | 6 | 163,788,191 | 164,043,825 | 2 | 0 | 2 | 1 |
| Case 91 | 6 | 164,050,359 | 164,361,544 | 3 | 0 | 3 | 1 |
| Case 91 | 6 | 164,362,709 | 165,015,261 | 2 | 0 | 2 | 1 |
| Case 91 | 6 | 165,015,966 | 165,133,335 | 3 | 0 | 3 | 1 |
| Case 91 | 6 | 165,161,492 | 166,031,534 | 2 | 0 | 2 | 1 |
| Case 91 | 6 | 166,033,671 | 166,468,915 | 3 | 0 | 3 | 1 |
| Case 91 | 6 | 166,470,464 | 166,574,346 | 2 | 0 | 2 | 1 |
| Case 91 | 6 | 166,579,253 | 168,439,394 | 3 | 0 | 3 | 1 |
| Case 91 | 6 | 168,440,640 | 168,576,745 | 2 | 0 | 2 | 1 |
| Case 91 | 6 | 168,577,460 | 169,634,930 | 3 | 0 | 3 | 1 |
| Case 91 | 6 | 169,637,456 | 169,642,042 | 2 | 0 | 2 | 1 |
| Case 91 | 6 | 169,643,685 | 170,980,171 | 3 | 0 | 3 | 1 |
| Case 91 | 7 | 44,935      | 4,825,686   | 2 | 2 | 4 | 0 |
| Case 91 | 7 | 4,827,859   | 4,854,998   | 2 | 1 | 3 | 0 |
| Case 91 | 7 | 4,855,862   | 46,093,628  | 2 | 2 | 4 | 0 |
| Case 91 | 7 | 46,113,834  | 46,113,883  | 1 | 0 | 1 | 0 |
| Case 91 | 7 | 46,116,722  | 58,019,061  | 2 | 2 | 4 | 0 |
| Case 91 | 7 | 61,056,053  | 91,029,468  | 2 | 2 | 4 | 0 |
| Case 91 | 7 | 91,033,074  | 91,033,751  | 1 | 0 | 1 | 0 |
| Case 91 | 7 | 91,038,222  | 149,512,267 | 2 | 2 | 4 | 0 |
| Case 91 | 7 | 149,512,331 | 149,521,199 | 2 | 1 | 3 | 0 |
| Case 91 | 7 | 149,521,517 | 159,119,486 | 2 | 2 | 4 | 0 |
| Case 91 | 8 | 164,984     | 2,135,762   | 2 | 2 | 4 | 0 |
| Case 91 | 8 | 2,142,267   | 2,214,734   | 4 | 2 | 6 | 0 |

|         |   |            |            |   |   |   |   |
|---------|---|------------|------------|---|---|---|---|
| Case 91 | 8 | 2,214,787  | 43,791,691 | 2 | 2 | 4 | 0 |
| Case 91 | 8 | 46,886,735 | 49,637,360 | 2 | 2 | 4 | 0 |
| Case 91 | 8 | 49,642,398 | 50,396,852 | 3 | 2 | 5 | 0 |
| Case 91 | 8 | 50,403,271 | 51,855,787 | 4 | 2 | 6 | 0 |
| Case 91 | 8 | 51,862,244 | 52,454,721 | 3 | 2 | 5 | 0 |
| Case 91 | 8 | 52,457,825 | 53,001,694 | 4 | 2 | 6 | 0 |
| Case 91 | 8 | 53,006,766 | 53,287,893 | 3 | 2 | 5 | 0 |
| Case 91 | 8 | 53,291,161 | 54,038,721 | 4 | 2 | 6 | 0 |
| Case 91 | 8 | 54,040,235 | 55,079,018 | 3 | 2 | 5 | 0 |
| Case 91 | 8 | 55,094,784 | 55,281,514 | 4 | 2 | 6 | 0 |
| Case 91 | 8 | 55,292,539 | 56,004,352 | 3 | 2 | 5 | 0 |
| Case 91 | 8 | 56,006,992 | 56,814,010 | 4 | 2 | 6 | 0 |
| Case 91 | 8 | 56,816,710 | 57,559,056 | 3 | 2 | 5 | 0 |
| Case 91 | 8 | 57,560,790 | 57,834,357 | 4 | 2 | 6 | 0 |
| Case 91 | 8 | 57,835,489 | 58,151,537 | 3 | 2 | 5 | 0 |
| Case 91 | 8 | 58,156,121 | 58,784,889 | 4 | 2 | 6 | 0 |
| Case 91 | 8 | 58,788,078 | 59,066,247 | 3 | 2 | 5 | 0 |
| Case 91 | 8 | 59,070,935 | 59,305,199 | 4 | 2 | 6 | 0 |
| Case 91 | 8 | 59,305,290 | 59,493,112 | 3 | 2 | 5 | 0 |
| Case 91 | 8 | 59,494,712 | 59,720,604 | 4 | 2 | 6 | 0 |
| Case 91 | 8 | 59,722,405 | 59,766,131 | 3 | 2 | 5 | 0 |
| Case 91 | 8 | 59,766,309 | 60,338,539 | 4 | 2 | 6 | 0 |
| Case 91 | 8 | 60,345,744 | 61,064,522 | 3 | 2 | 5 | 0 |
| Case 91 | 8 | 61,067,170 | 63,906,122 | 4 | 2 | 6 | 0 |
| Case 91 | 8 | 63,906,828 | 64,050,344 | 3 | 2 | 5 | 0 |
| Case 91 | 8 | 64,067,109 | 64,367,858 | 4 | 2 | 6 | 0 |
| Case 91 | 8 | 64,369,361 | 64,735,494 | 3 | 2 | 5 | 0 |
| Case 91 | 8 | 64,743,305 | 65,593,996 | 4 | 2 | 6 | 0 |
| Case 91 | 8 | 65,594,917 | 68,527,890 | 3 | 2 | 5 | 0 |
| Case 91 | 8 | 68,528,197 | 68,650,640 | 4 | 2 | 6 | 0 |
| Case 91 | 8 | 68,653,516 | 69,106,451 | 3 | 2 | 5 | 0 |
| Case 91 | 8 | 69,111,735 | 69,411,716 | 4 | 2 | 6 | 0 |
| Case 91 | 8 | 69,419,194 | 69,883,644 | 3 | 2 | 5 | 0 |
| Case 91 | 8 | 69,883,967 | 69,959,105 | 4 | 2 | 6 | 0 |
| Case 91 | 8 | 69,966,936 | 70,410,776 | 3 | 2 | 5 | 0 |
| Case 91 | 8 | 70,410,813 | 70,513,477 | 4 | 2 | 6 | 0 |
| Case 91 | 8 | 70,513,720 | 70,767,079 | 3 | 2 | 5 | 0 |
| Case 91 | 8 | 70,770,391 | 70,926,678 | 4 | 2 | 6 | 0 |
| Case 91 | 8 | 70,927,807 | 71,464,387 | 3 | 2 | 5 | 0 |
| Case 91 | 8 | 71,468,885 | 72,530,703 | 4 | 2 | 6 | 0 |
| Case 91 | 8 | 72,531,550 | 72,761,149 | 3 | 2 | 5 | 0 |
| Case 91 | 8 | 72,761,190 | 73,025,542 | 4 | 2 | 6 | 0 |
| Case 91 | 8 | 73,030,939 | 74,291,106 | 3 | 2 | 5 | 0 |
| Case 91 | 8 | 74,298,129 | 74,463,510 | 4 | 2 | 6 | 0 |
| Case 91 | 8 | 74,466,473 | 75,249,396 | 3 | 2 | 5 | 0 |
| Case 91 | 8 | 75,254,086 | 75,474,529 | 4 | 2 | 6 | 0 |
| Case 91 | 8 | 75,476,021 | 75,945,850 | 3 | 2 | 5 | 0 |
| Case 91 | 8 | 75,946,695 | 77,671,877 | 4 | 2 | 6 | 0 |
| Case 91 | 8 | 77,686,271 | 77,796,116 | 3 | 2 | 5 | 0 |
| Case 91 | 8 | 77,796,946 | 78,815,409 | 4 | 2 | 6 | 0 |
| Case 91 | 8 | 78,815,891 | 79,779,026 | 3 | 2 | 5 | 0 |
| Case 91 | 8 | 79,790,796 | 80,430,937 | 4 | 2 | 6 | 0 |
| Case 91 | 8 | 80,431,800 | 80,976,814 | 3 | 2 | 5 | 0 |
| Case 91 | 8 | 80,980,662 | 81,312,277 | 4 | 2 | 6 | 0 |
| Case 91 | 8 | 81,318,892 | 81,609,700 | 3 | 2 | 5 | 0 |
| Case 91 | 8 | 81,625,458 | 81,886,686 | 4 | 2 | 6 | 0 |
| Case 91 | 8 | 81,887,806 | 82,236,841 | 3 | 2 | 5 | 0 |
| Case 91 | 8 | 82,237,403 | 82,289,838 | 4 | 2 | 6 | 0 |
| Case 91 | 8 | 82,307,171 | 82,651,241 | 3 | 2 | 5 | 0 |
| Case 91 | 8 | 82,653,644 | 83,098,845 | 4 | 2 | 6 | 0 |
| Case 91 | 8 | 83,115,706 | 83,183,692 | 3 | 2 | 5 | 0 |

|         |   |             |             |   |   |   |   |
|---------|---|-------------|-------------|---|---|---|---|
| Case 91 | 8 | 83,219,272  | 83,599,801  | 2 | 1 | 3 | 0 |
| Case 91 | 8 | 83,601,965  | 83,601,965  | 2 | 2 | 4 | 0 |
| Case 91 | 8 | 83,615,856  | 83,892,519  | 4 | 2 | 6 | 0 |
| Case 91 | 8 | 83,906,803  | 84,341,097  | 3 | 2 | 5 | 0 |
| Case 91 | 8 | 84,373,550  | 87,076,250  | 4 | 2 | 6 | 0 |
| Case 91 | 8 | 87,076,258  | 87,683,198  | 3 | 2 | 5 | 0 |
| Case 91 | 8 | 87,690,019  | 87,914,099  | 4 | 2 | 6 | 0 |
| Case 91 | 8 | 87,914,971  | 88,472,853  | 3 | 2 | 5 | 0 |
| Case 91 | 8 | 88,472,924  | 89,083,979  | 4 | 2 | 6 | 0 |
| Case 91 | 8 | 89,084,837  | 90,449,190  | 3 | 2 | 5 | 0 |
| Case 91 | 8 | 90,476,925  | 92,050,774  | 4 | 2 | 6 | 0 |
| Case 91 | 8 | 92,055,426  | 93,213,672  | 3 | 2 | 5 | 0 |
| Case 91 | 8 | 93,213,730  | 93,493,264  | 4 | 2 | 6 | 0 |
| Case 91 | 8 | 93,493,424  | 93,658,348  | 3 | 2 | 5 | 0 |
| Case 91 | 8 | 93,664,619  | 94,091,847  | 4 | 2 | 6 | 0 |
| Case 91 | 8 | 94,092,222  | 94,439,189  | 3 | 2 | 5 | 0 |
| Case 91 | 8 | 94,464,752  | 95,161,080  | 4 | 2 | 6 | 0 |
| Case 91 | 8 | 95,161,082  | 95,383,875  | 3 | 2 | 5 | 0 |
| Case 91 | 8 | 95,384,436  | 96,730,999  | 4 | 2 | 6 | 0 |
| Case 91 | 8 | 96,731,898  | 96,985,292  | 3 | 2 | 5 | 0 |
| Case 91 | 8 | 96,988,158  | 97,122,652  | 4 | 2 | 6 | 0 |
| Case 91 | 8 | 97,125,655  | 97,682,211  | 3 | 2 | 5 | 0 |
| Case 91 | 8 | 97,684,364  | 98,168,703  | 4 | 2 | 6 | 0 |
| Case 91 | 8 | 98,168,814  | 98,483,235  | 3 | 2 | 5 | 0 |
| Case 91 | 8 | 98,485,861  | 98,970,479  | 4 | 2 | 6 | 0 |
| Case 91 | 8 | 98,972,725  | 99,088,251  | 3 | 2 | 5 | 0 |
| Case 91 | 8 | 99,088,581  | 102,514,213 | 4 | 2 | 6 | 0 |
| Case 91 | 8 | 102,514,354 | 103,058,601 | 3 | 2 | 5 | 0 |
| Case 91 | 8 | 103,059,848 | 103,469,290 | 4 | 2 | 6 | 0 |
| Case 91 | 8 | 103,483,466 | 103,769,678 | 3 | 2 | 5 | 0 |
| Case 91 | 8 | 103,770,205 | 105,478,933 | 4 | 2 | 6 | 0 |
| Case 91 | 8 | 105,479,120 | 105,942,054 | 3 | 2 | 5 | 0 |
| Case 91 | 8 | 105,943,784 | 106,792,591 | 4 | 2 | 6 | 0 |
| Case 91 | 8 | 106,798,675 | 106,815,578 | 3 | 2 | 5 | 0 |
| Case 91 | 8 | 106,816,281 | 107,763,828 | 4 | 2 | 6 | 0 |
| Case 91 | 8 | 107,773,278 | 107,957,800 | 3 | 2 | 5 | 0 |
| Case 91 | 8 | 107,961,779 | 110,456,971 | 4 | 2 | 6 | 0 |
| Case 91 | 8 | 110,456,989 | 110,673,564 | 3 | 2 | 5 | 0 |
| Case 91 | 8 | 110,676,039 | 112,290,740 | 4 | 2 | 6 | 0 |
| Case 91 | 8 | 112,303,321 | 112,633,913 | 3 | 2 | 5 | 0 |
| Case 91 | 8 | 112,641,812 | 113,241,088 | 4 | 2 | 6 | 0 |
| Case 91 | 8 | 113,246,660 | 113,405,543 | 3 | 2 | 5 | 0 |
| Case 91 | 8 | 113,411,888 | 113,975,571 | 4 | 2 | 6 | 0 |
| Case 91 | 8 | 113,988,161 | 114,415,265 | 3 | 2 | 5 | 0 |
| Case 91 | 8 | 114,417,130 | 115,011,589 | 4 | 2 | 6 | 0 |
| Case 91 | 8 | 115,012,364 | 116,670,347 | 3 | 2 | 5 | 0 |
| Case 91 | 8 | 116,670,428 | 117,480,311 | 4 | 2 | 6 | 0 |
| Case 91 | 8 | 117,482,886 | 117,838,623 | 3 | 2 | 5 | 0 |
| Case 91 | 8 | 117,841,222 | 118,001,867 | 4 | 2 | 6 | 0 |
| Case 91 | 8 | 118,002,807 | 118,296,603 | 3 | 2 | 5 | 0 |
| Case 91 | 8 | 118,300,497 | 118,442,583 | 4 | 2 | 6 | 0 |
| Case 91 | 8 | 118,457,084 | 118,710,620 | 3 | 2 | 5 | 0 |
| Case 91 | 8 | 118,713,826 | 120,363,974 | 4 | 2 | 6 | 0 |
| Case 91 | 8 | 120,365,319 | 120,715,175 | 3 | 2 | 5 | 0 |
| Case 91 | 8 | 120,718,441 | 121,555,764 | 4 | 2 | 6 | 0 |
| Case 91 | 8 | 121,561,028 | 121,840,359 | 3 | 2 | 5 | 0 |
| Case 91 | 8 | 121,840,706 | 123,545,374 | 4 | 2 | 6 | 0 |
| Case 91 | 8 | 123,552,740 | 123,966,118 | 3 | 2 | 5 | 0 |
| Case 91 | 8 | 123,967,175 | 124,172,895 | 4 | 2 | 6 | 0 |
| Case 91 | 8 | 124,176,245 | 124,256,276 | 3 | 2 | 5 | 0 |
| Case 91 | 8 | 124,259,431 | 124,614,367 | 4 | 2 | 6 | 0 |

|         |    |             |             |   |   |   |   |
|---------|----|-------------|-------------|---|---|---|---|
| Case 91 | 8  | 124,616,796 | 125,268,122 | 3 | 2 | 5 | 0 |
| Case 91 | 8  | 125,268,800 | 125,430,662 | 4 | 2 | 6 | 0 |
| Case 91 | 8  | 125,437,811 | 125,677,005 | 3 | 2 | 5 | 0 |
| Case 91 | 8  | 125,681,849 | 125,815,850 | 4 | 2 | 6 | 0 |
| Case 91 | 8  | 125,825,915 | 126,068,873 | 3 | 2 | 5 | 0 |
| Case 91 | 8  | 126,071,717 | 128,483,096 | 4 | 2 | 6 | 0 |
| Case 91 | 8  | 128,484,223 | 128,600,662 | 3 | 2 | 5 | 0 |
| Case 91 | 8  | 128,601,372 | 129,748,718 | 4 | 2 | 6 | 0 |
| Case 91 | 8  | 129,794,677 | 130,181,882 | 3 | 2 | 5 | 0 |
| Case 91 | 8  | 130,184,121 | 131,797,568 | 4 | 2 | 6 | 0 |
| Case 91 | 8  | 131,799,767 | 132,389,937 | 3 | 2 | 5 | 0 |
| Case 91 | 8  | 132,398,697 | 133,035,196 | 4 | 2 | 6 | 0 |
| Case 91 | 8  | 133,036,718 | 134,296,524 | 3 | 2 | 5 | 0 |
| Case 91 | 8  | 134,298,492 | 134,327,372 | 4 | 2 | 6 | 0 |
| Case 91 | 8  | 134,327,512 | 134,508,256 | 3 | 2 | 5 | 0 |
| Case 91 | 8  | 134,508,510 | 134,700,316 | 4 | 2 | 6 | 0 |
| Case 91 | 8  | 134,700,487 | 135,744,460 | 3 | 2 | 5 | 0 |
| Case 91 | 8  | 135,745,432 | 135,954,467 | 4 | 2 | 6 | 0 |
| Case 91 | 8  | 135,958,538 | 137,428,405 | 3 | 2 | 5 | 0 |
| Case 91 | 8  | 137,430,757 | 137,679,805 | 4 | 2 | 6 | 0 |
| Case 91 | 8  | 137,682,484 | 138,336,145 | 3 | 2 | 5 | 0 |
| Case 91 | 8  | 138,337,729 | 138,596,758 | 4 | 2 | 6 | 0 |
| Case 91 | 8  | 138,598,197 | 138,634,023 | 3 | 2 | 5 | 0 |
| Case 91 | 8  | 138,638,199 | 138,791,415 | 4 | 2 | 6 | 0 |
| Case 91 | 8  | 138,791,736 | 139,328,092 | 3 | 2 | 5 | 0 |
| Case 91 | 8  | 139,328,196 | 139,513,971 | 4 | 2 | 6 | 0 |
| Case 91 | 8  | 139,518,806 | 140,081,806 | 3 | 2 | 5 | 0 |
| Case 91 | 8  | 140,084,803 | 140,258,963 | 4 | 2 | 6 | 0 |
| Case 91 | 8  | 140,259,225 | 140,309,909 | 3 | 2 | 5 | 0 |
| Case 91 | 8  | 140,318,368 | 140,646,990 | 4 | 2 | 6 | 0 |
| Case 91 | 8  | 140,650,804 | 141,506,903 | 3 | 2 | 5 | 0 |
| Case 91 | 8  | 141,514,184 | 142,125,305 | 4 | 2 | 6 | 0 |
| Case 91 | 8  | 142,131,002 | 142,593,773 | 3 | 2 | 5 | 0 |
| Case 91 | 8  | 142,598,202 | 143,302,166 | 4 | 2 | 6 | 0 |
| Case 91 | 8  | 143,302,580 | 146,293,414 | 3 | 2 | 5 | 0 |
| Case 91 | 9  | 46,587      | 46,944,322  | 2 | 2 | 4 | 0 |
| Case 91 | 9  | 65,629,772  | 72,091,104  | 2 | 2 | 4 | 0 |
| Case 91 | 9  | 72,100,118  | 72,107,335  | 1 | 0 | 1 | 0 |
| Case 91 | 9  | 72,115,231  | 95,218,829  | 2 | 2 | 4 | 0 |
| Case 91 | 9  | 95,219,248  | 141,066,491 | 4 | 0 | 4 | 1 |
| Case 91 | 10 | 98,087      | 39,097,912  | 2 | 2 | 4 | 0 |
| Case 91 | 10 | 42,436,301  | 135,477,883 | 2 | 2 | 4 | 0 |
| Case 91 | 11 | 193,146     | 51,591,253  | 2 | 2 | 4 | 0 |
| Case 91 | 11 | 54,794,237  | 55,362,955  | 2 | 2 | 4 | 0 |
| Case 91 | 11 | 55,370,325  | 55,427,700  | 1 | 0 | 1 | 0 |
| Case 91 | 11 | 55,431,897  | 86,304,054  | 2 | 2 | 4 | 0 |
| Case 91 | 11 | 86,304,402  | 86,305,758  | 1 | 0 | 1 | 0 |
| Case 91 | 11 | 86,308,532  | 134,934,063 | 2 | 2 | 4 | 0 |
| Case 91 | 12 | 191,619     | 34,170,425  | 4 | 0 | 4 | 1 |
| Case 91 | 12 | 34,174,756  | 34,340,168  | 2 | 2 | 4 | 0 |
| Case 91 | 12 | 34,362,752  | 34,853,011  | 3 | 0 | 3 | 1 |
| Case 91 | 12 | 37,876,400  | 38,514,872  | 3 | 0 | 3 | 1 |
| Case 91 | 12 | 38,528,487  | 133,810,935 | 4 | 0 | 4 | 1 |
| Case 91 | 13 | 19,058,717  | 115,103,529 | 2 | 2 | 4 | 0 |
| Case 91 | 14 | 19,280,733  | 22,599,159  | 2 | 2 | 4 | 0 |
| Case 91 | 14 | 22,605,173  | 22,922,238  | 3 | 2 | 5 | 0 |
| Case 91 | 14 | 22,924,194  | 107,287,663 | 2 | 2 | 4 | 0 |
| Case 91 | 15 | 20,034,919  | 43,893,610  | 2 | 2 | 4 | 0 |
| Case 91 | 15 | 43,893,818  | 43,939,659  | 4 | 2 | 6 | 0 |
| Case 91 | 15 | 43,990,211  | 102,461,162 | 2 | 2 | 4 | 0 |
| Case 91 | 16 | 88,165      | 1,250,279   | 2 | 2 | 4 | 0 |

|         |    |            |            |   |   |   |   |
|---------|----|------------|------------|---|---|---|---|
| Case 91 | 16 | 1,250,378  | 1,256,122  | 2 | 1 | 3 | 0 |
| Case 91 | 16 | 1,256,126  | 35,285,582 | 2 | 2 | 4 | 0 |
| Case 91 | 16 | 46,450,037 | 53,780,102 | 2 | 2 | 4 | 0 |
| Case 91 | 16 | 53,790,402 | 53,981,421 | 3 | 0 | 3 | 1 |
| Case 91 | 16 | 53,989,673 | 78,631,794 | 2 | 2 | 4 | 0 |
| Case 91 | 16 | 78,635,193 | 78,703,545 | 3 | 0 | 3 | 1 |
| Case 91 | 16 | 78,705,026 | 78,713,526 | 2 | 0 | 2 | 1 |
| Case 91 | 16 | 78,714,567 | 78,731,449 | 0 | 0 | 0 | 0 |
| Case 91 | 16 | 78,733,911 | 78,818,322 | 3 | 0 | 3 | 1 |
| Case 91 | 16 | 78,819,227 | 78,863,813 | 2 | 0 | 2 | 1 |
| Case 91 | 16 | 78,864,699 | 78,883,118 | 3 | 0 | 3 | 1 |
| Case 91 | 16 | 78,885,182 | 79,906,401 | 2 | 2 | 4 | 0 |
| Case 91 | 16 | 79,914,909 | 79,993,593 | 3 | 2 | 5 | 0 |
| Case 91 | 16 | 79,997,583 | 80,245,950 | 4 | 2 | 6 | 0 |
| Case 91 | 16 | 80,247,432 | 80,429,577 | 3 | 2 | 5 | 0 |
| Case 91 | 16 | 80,440,301 | 90,274,695 | 2 | 2 | 4 | 0 |
| Case 91 | 17 | 11,885     | 15,983,762 | 4 | 0 | 4 | 1 |
| Case 91 | 17 | 15,983,784 | 22,242,355 | 2 | 2 | 4 | 0 |
| Case 91 | 17 | 25,268,142 | 34,436,708 | 2 | 2 | 4 | 0 |
| Case 91 | 17 | 34,443,811 | 34,825,482 | 4 | 2 | 6 | 0 |
| Case 91 | 17 | 34,831,963 | 81,060,040 | 2 | 2 | 4 | 0 |
| Case 91 | 18 | 87,505     | 15,375,878 | 2 | 2 | 4 | 0 |
| Case 91 | 18 | 18,520,354 | 78,015,180 | 2 | 2 | 4 | 0 |
| Case 91 | 19 | 260,912    | 8,130,238  | 2 | 2 | 4 | 0 |
| Case 91 | 19 | 8,130,867  | 8,151,993  | 2 | 1 | 3 | 0 |
| Case 91 | 19 | 8,152,017  | 23,503,445 | 2 | 2 | 4 | 0 |
| Case 91 | 19 | 23,511,218 | 24,629,285 | 2 | 1 | 3 | 0 |
| Case 91 | 19 | 27,732,159 | 27,960,006 | 2 | 1 | 3 | 0 |
| Case 91 | 19 | 27,978,445 | 41,356,054 | 2 | 2 | 4 | 0 |
| Case 91 | 19 | 41,356,751 | 41,379,148 | 1 | 0 | 1 | 0 |
| Case 91 | 19 | 41,382,476 | 59,097,160 | 2 | 2 | 4 | 0 |
| Case 91 | 20 | 63,244     | 26,293,985 | 2 | 2 | 4 | 0 |
| Case 91 | 20 | 29,425,357 | 60,891,045 | 2 | 2 | 4 | 0 |
| Case 91 | 20 | 60,891,783 | 60,899,192 | 2 | 1 | 3 | 0 |
| Case 91 | 20 | 60,899,196 | 62,948,788 | 2 | 2 | 4 | 0 |
| Case 91 | 21 | 10,827,533 | 10,971,337 | 4 | 0 | 4 | 1 |
| Case 91 | 21 | 14,368,320 | 48,100,155 | 4 | 0 | 4 | 1 |
| Case 91 | 22 | 16,114,244 | 51,195,728 | 2 | 2 | 4 | 0 |
| Case 92 | 1  | 82,154     | 1,210,471  | 2 | 0 | 2 | 1 |
| Case 92 | 1  | 1,210,963  | 1,273,365  | 1 | 0 | 1 | 0 |
| Case 92 | 1  | 1,273,654  | 2,939,260  | 2 | 0 | 2 | 1 |
| Case 92 | 1  | 2,939,409  | 3,169,088  | 3 | 0 | 3 | 1 |
| Case 92 | 1  | 3,177,480  | 3,407,007  | 2 | 0 | 2 | 1 |
| Case 92 | 1  | 3,407,112  | 3,456,871  | 1 | 0 | 1 | 0 |
| Case 92 | 1  | 3,457,295  | 4,190,685  | 2 | 0 | 2 | 1 |
| Case 92 | 1  | 4,194,597  | 4,772,619  | 3 | 0 | 3 | 1 |
| Case 92 | 1  | 4,772,658  | 4,965,631  | 2 | 0 | 2 | 1 |
| Case 92 | 1  | 4,968,528  | 5,312,308  | 3 | 0 | 3 | 1 |
| Case 92 | 1  | 5,312,366  | 5,479,861  | 2 | 0 | 2 | 1 |
| Case 92 | 1  | 5,482,386  | 5,717,388  | 3 | 0 | 3 | 1 |
| Case 92 | 1  | 5,719,342  | 5,993,223  | 2 | 1 | 3 | 0 |
| Case 92 | 1  | 5,993,313  | 9,422,435  | 2 | 2 | 4 | 0 |
| Case 92 | 1  | 9,422,875  | 10,643,829 | 3 | 2 | 5 | 0 |
| Case 92 | 1  | 10,649,223 | 13,743,099 | 2 | 1 | 3 | 0 |
| Case 92 | 1  | 13,775,026 | 13,923,574 | 2 | 2 | 4 | 0 |
| Case 92 | 1  | 13,933,727 | 14,279,513 | 2 | 0 | 2 | 1 |
| Case 92 | 1  | 14,279,619 | 15,599,025 | 3 | 0 | 3 | 1 |
| Case 92 | 1  | 15,599,160 | 17,386,104 | 2 | 0 | 2 | 1 |
| Case 92 | 1  | 17,386,880 | 17,490,249 | 3 | 0 | 3 | 1 |
| Case 92 | 1  | 17,501,898 | 18,024,794 | 2 | 0 | 2 | 1 |
| Case 92 | 1  | 18,026,435 | 18,391,974 | 3 | 0 | 3 | 1 |

|         |   |             |             |   |   |   |   |
|---------|---|-------------|-------------|---|---|---|---|
| Case 92 | 1 | 18,392,608  | 18,696,322  | 2 | 0 | 2 | 1 |
| Case 92 | 1 | 18,696,728  | 18,805,564  | 3 | 0 | 3 | 1 |
| Case 92 | 1 | 18,805,698  | 19,635,032  | 2 | 0 | 2 | 1 |
| Case 92 | 1 | 19,636,041  | 20,943,139  | 3 | 0 | 3 | 1 |
| Case 92 | 1 | 20,943,195  | 22,595,026  | 2 | 0 | 2 | 1 |
| Case 92 | 1 | 22,596,600  | 22,807,171  | 3 | 0 | 3 | 1 |
| Case 92 | 1 | 22,816,686  | 22,989,745  | 2 | 0 | 2 | 1 |
| Case 92 | 1 | 22,993,335  | 23,689,580  | 3 | 0 | 3 | 1 |
| Case 92 | 1 | 23,689,657  | 24,684,728  | 2 | 0 | 2 | 1 |
| Case 92 | 1 | 24,687,343  | 25,289,427  | 3 | 0 | 3 | 1 |
| Case 92 | 1 | 25,294,264  | 25,364,652  | 2 | 1 | 3 | 0 |
| Case 92 | 1 | 25,366,182  | 27,930,898  | 2 | 0 | 2 | 1 |
| Case 92 | 1 | 27,931,698  | 28,087,052  | 3 | 0 | 3 | 1 |
| Case 92 | 1 | 28,087,085  | 29,707,412  | 2 | 0 | 2 | 1 |
| Case 92 | 1 | 29,711,271  | 31,188,935  | 3 | 0 | 3 | 1 |
| Case 92 | 1 | 31,189,689  | 49,589,847  | 2 | 1 | 3 | 0 |
| Case 92 | 1 | 49,592,880  | 50,613,772  | 2 | 0 | 2 | 1 |
| Case 92 | 1 | 50,620,945  | 53,320,274  | 3 | 0 | 3 | 1 |
| Case 92 | 1 | 53,322,768  | 53,579,583  | 2 | 0 | 2 | 1 |
| Case 92 | 1 | 53,580,433  | 54,415,698  | 3 | 0 | 3 | 1 |
| Case 92 | 1 | 54,417,796  | 54,608,460  | 2 | 0 | 2 | 1 |
| Case 92 | 1 | 54,609,652  | 54,794,985  | 3 | 0 | 3 | 1 |
| Case 92 | 1 | 54,796,767  | 55,775,534  | 2 | 0 | 2 | 1 |
| Case 92 | 1 | 55,775,665  | 57,936,193  | 3 | 0 | 3 | 1 |
| Case 92 | 1 | 57,937,562  | 58,286,508  | 2 | 0 | 2 | 1 |
| Case 92 | 1 | 58,288,317  | 62,482,827  | 3 | 0 | 3 | 1 |
| Case 92 | 1 | 62,483,586  | 64,034,086  | 2 | 0 | 2 | 1 |
| Case 92 | 1 | 64,034,140  | 65,135,068  | 3 | 0 | 3 | 1 |
| Case 92 | 1 | 65,139,130  | 66,915,125  | 2 | 0 | 2 | 1 |
| Case 92 | 1 | 66,917,166  | 69,243,474  | 3 | 0 | 3 | 1 |
| Case 92 | 1 | 69,243,544  | 85,094,999  | 2 | 0 | 2 | 1 |
| Case 92 | 1 | 85,095,457  | 86,591,161  | 3 | 0 | 3 | 1 |
| Case 92 | 1 | 86,591,291  | 86,949,930  | 2 | 0 | 2 | 1 |
| Case 92 | 1 | 86,950,320  | 91,014,198  | 3 | 0 | 3 | 1 |
| Case 92 | 1 | 91,018,205  | 91,885,970  | 2 | 0 | 2 | 1 |
| Case 92 | 1 | 91,886,640  | 92,215,089  | 3 | 0 | 3 | 1 |
| Case 92 | 1 | 92,215,725  | 94,467,407  | 2 | 0 | 2 | 1 |
| Case 92 | 1 | 94,467,548  | 96,120,380  | 3 | 0 | 3 | 1 |
| Case 92 | 1 | 96,124,935  | 99,949,506  | 2 | 0 | 2 | 1 |
| Case 92 | 1 | 99,951,162  | 101,203,664 | 3 | 0 | 3 | 1 |
| Case 92 | 1 | 101,203,691 | 107,861,609 | 2 | 0 | 2 | 1 |
| Case 92 | 1 | 107,862,053 | 111,319,892 | 3 | 0 | 3 | 1 |
| Case 92 | 1 | 111,322,647 | 111,724,915 | 2 | 0 | 2 | 1 |
| Case 92 | 1 | 111,726,213 | 112,243,947 | 3 | 0 | 3 | 1 |
| Case 92 | 1 | 112,245,587 | 117,838,939 | 2 | 1 | 3 | 0 |
| Case 92 | 1 | 117,844,251 | 119,925,632 | 2 | 2 | 4 | 0 |
| Case 92 | 1 | 119,925,642 | 121,346,616 | 2 | 1 | 3 | 0 |
| Case 92 | 1 | 142,649,718 | 145,021,126 | 2 | 1 | 3 | 0 |
| Case 92 | 1 | 145,075,809 | 152,060,492 | 2 | 2 | 4 | 0 |
| Case 92 | 1 | 152,060,495 | 152,286,388 | 2 | 1 | 3 | 0 |
| Case 92 | 1 | 152,286,468 | 155,145,097 | 2 | 2 | 4 | 0 |
| Case 92 | 1 | 155,146,102 | 155,292,624 | 2 | 1 | 3 | 0 |
| Case 92 | 1 | 155,292,708 | 174,781,083 | 2 | 2 | 4 | 0 |
| Case 92 | 1 | 174,794,144 | 174,903,882 | 2 | 0 | 2 | 1 |
| Case 92 | 1 | 174,926,686 | 182,420,448 | 2 | 2 | 4 | 0 |
| Case 92 | 1 | 182,422,667 | 225,036,472 | 2 | 1 | 3 | 0 |
| Case 92 | 1 | 225,038,158 | 225,562,385 | 3 | 1 | 4 | 0 |
| Case 92 | 1 | 225,562,475 | 245,170,495 | 2 | 1 | 3 | 0 |
| Case 92 | 1 | 245,173,460 | 245,446,024 | 3 | 0 | 3 | 1 |
| Case 92 | 1 | 245,446,721 | 245,477,121 | 2 | 0 | 2 | 1 |
| Case 92 | 1 | 245,480,950 | 246,181,070 | 2 | 1 | 3 | 0 |



|         |   |             |             |   |   |   |   |
|---------|---|-------------|-------------|---|---|---|---|
| Case 92 | 1 | 246,182,293 | 246,393,283 | 2 | 0 | 2 | 1 |
| Case 92 | 1 | 246,409,434 | 249,218,992 | 2 | 1 | 3 | 0 |
| Case 92 | 2 | 18,674      | 2,633,258   | 1 | 1 | 2 | 0 |
| Case 92 | 2 | 2,633,388   | 3,027,789   | 2 | 1 | 3 | 0 |
| Case 92 | 2 | 3,029,042   | 3,729,254   | 1 | 1 | 2 | 0 |
| Case 92 | 2 | 3,730,635   | 4,469,132   | 2 | 1 | 3 | 0 |
| Case 92 | 2 | 4,470,836   | 6,946,945   | 1 | 1 | 2 | 0 |
| Case 92 | 2 | 6,947,587   | 33,664,350  | 2 | 1 | 3 | 0 |
| Case 92 | 2 | 33,668,178  | 33,996,983  | 1 | 1 | 2 | 0 |
| Case 92 | 2 | 34,001,967  | 34,290,662  | 2 | 1 | 3 | 0 |
| Case 92 | 2 | 34,291,360  | 36,270,756  | 1 | 1 | 2 | 0 |
| Case 92 | 2 | 36,273,831  | 49,634,490  | 2 | 1 | 3 | 0 |
| Case 92 | 2 | 49,635,681  | 53,851,844  | 1 | 1 | 2 | 0 |
| Case 92 | 2 | 53,852,071  | 57,039,250  | 2 | 1 | 3 | 0 |
| Case 92 | 2 | 57,040,068  | 59,494,725  | 1 | 1 | 2 | 0 |
| Case 92 | 2 | 59,496,548  | 71,118,757  | 2 | 1 | 3 | 0 |
| Case 92 | 2 | 71,126,725  | 71,739,734  | 1 | 1 | 2 | 0 |
| Case 92 | 2 | 71,740,142  | 73,179,990  | 2 | 1 | 3 | 0 |
| Case 92 | 2 | 73,184,979  | 73,680,508  | 1 | 1 | 2 | 0 |
| Case 92 | 2 | 73,680,922  | 74,077,526  | 2 | 1 | 3 | 0 |
| Case 92 | 2 | 74,077,556  | 74,709,541  | 1 | 1 | 2 | 0 |
| Case 92 | 2 | 74,709,876  | 75,037,843  | 2 | 1 | 3 | 0 |
| Case 92 | 2 | 75,039,614  | 78,861,056  | 1 | 1 | 2 | 0 |
| Case 92 | 2 | 78,870,238  | 79,400,697  | 2 | 1 | 3 | 0 |
| Case 92 | 2 | 79,404,926  | 83,947,833  | 1 | 1 | 2 | 0 |
| Case 92 | 2 | 83,948,943  | 88,427,471  | 2 | 1 | 3 | 0 |
| Case 92 | 2 | 88,428,571  | 92,081,640  | 1 | 1 | 2 | 0 |
| Case 92 | 2 | 95,429,424  | 95,954,264  | 1 | 1 | 2 | 0 |
| Case 92 | 2 | 95,954,266  | 98,427,662  | 2 | 1 | 3 | 0 |
| Case 92 | 2 | 98,429,181  | 98,853,173  | 2 | 0 | 2 | 1 |
| Case 92 | 2 | 98,866,775  | 101,141,543 | 2 | 1 | 3 | 0 |
| Case 92 | 2 | 101,143,716 | 109,668,668 | 1 | 1 | 2 | 0 |
| Case 92 | 2 | 109,669,494 | 112,655,242 | 2 | 1 | 3 | 0 |
| Case 92 | 2 | 112,662,407 | 113,082,564 | 5 | 0 | 5 | 1 |
| Case 92 | 2 | 113,088,878 | 113,089,267 | 2 | 1 | 3 | 0 |
| Case 92 | 2 | 113,089,799 | 113,797,677 | 3 | 1 | 4 | 0 |
| Case 92 | 2 | 113,798,388 | 114,162,983 | 2 | 1 | 3 | 0 |
| Case 92 | 2 | 114,256,949 | 147,648,705 | 1 | 1 | 2 | 0 |
| Case 92 | 2 | 147,667,221 | 148,414,707 | 2 | 1 | 3 | 0 |
| Case 92 | 2 | 148,418,820 | 152,402,171 | 1 | 1 | 2 | 0 |
| Case 92 | 2 | 152,404,198 | 153,299,943 | 2 | 1 | 3 | 0 |
| Case 92 | 2 | 153,315,366 | 154,032,484 | 3 | 1 | 4 | 0 |
| Case 92 | 2 | 154,052,591 | 157,873,775 | 2 | 1 | 3 | 0 |
| Case 92 | 2 | 157,875,846 | 160,125,205 | 1 | 1 | 2 | 0 |
| Case 92 | 2 | 160,128,306 | 160,239,267 | 2 | 0 | 2 | 1 |
| Case 92 | 2 | 160,239,378 | 160,374,182 | 1 | 0 | 1 | 0 |
| Case 92 | 2 | 160,386,260 | 165,602,181 | 1 | 1 | 2 | 0 |
| Case 92 | 2 | 165,612,039 | 166,019,183 | 2 | 1 | 3 | 0 |
| Case 92 | 2 | 166,020,893 | 171,438,669 | 1 | 1 | 2 | 0 |
| Case 92 | 2 | 171,440,524 | 172,919,713 | 3 | 1 | 4 | 0 |
| Case 92 | 2 | 172,921,454 | 174,132,406 | 2 | 1 | 3 | 0 |
| Case 92 | 2 | 174,134,529 | 198,097,758 | 1 | 1 | 2 | 0 |
| Case 92 | 2 | 198,108,977 | 198,517,592 | 3 | 1 | 4 | 0 |
| Case 92 | 2 | 198,520,615 | 199,402,357 | 2 | 1 | 3 | 0 |
| Case 92 | 2 | 199,409,121 | 200,578,867 | 1 | 1 | 2 | 0 |
| Case 92 | 2 | 200,579,502 | 201,438,089 | 2 | 1 | 3 | 0 |
| Case 92 | 2 | 201,438,143 | 202,074,528 | 3 | 1 | 4 | 0 |
| Case 92 | 2 | 202,077,613 | 203,194,256 | 1 | 1 | 2 | 0 |
| Case 92 | 2 | 203,203,865 | 204,436,759 | 3 | 1 | 4 | 0 |
| Case 92 | 2 | 204,440,428 | 205,572,718 | 2 | 1 | 3 | 0 |
| Case 92 | 2 | 205,581,824 | 205,697,101 | 1 | 1 | 2 | 0 |

|         |   |             |             |   |   |   |   |
|---------|---|-------------|-------------|---|---|---|---|
| Case 92 | 2 | 205,700,834 | 206,801,824 | 2 | 1 | 3 | 0 |
| Case 92 | 2 | 206,806,002 | 207,285,883 | 3 | 1 | 4 | 0 |
| Case 92 | 2 | 207,287,770 | 219,887,050 | 1 | 1 | 2 | 0 |
| Case 92 | 2 | 219,887,984 | 224,620,222 | 2 | 1 | 3 | 0 |
| Case 92 | 2 | 224,627,775 | 227,599,533 | 1 | 1 | 2 | 0 |
| Case 92 | 2 | 227,603,355 | 228,754,582 | 4 | 1 | 5 | 0 |
| Case 92 | 2 | 228,754,609 | 228,758,555 | 2 | 1 | 3 | 0 |
| Case 92 | 2 | 228,758,626 | 229,088,494 | 3 | 1 | 4 | 0 |
| Case 92 | 2 | 229,101,189 | 239,186,487 | 1 | 1 | 2 | 0 |
| Case 92 | 2 | 239,188,479 | 239,260,601 | 4 | 0 | 4 | 1 |
| Case 92 | 2 | 239,279,384 | 243,048,760 | 1 | 1 | 2 | 0 |
| Case 92 | 3 | 61,495      | 46,003,831  | 1 | 1 | 2 | 0 |
| Case 92 | 3 | 46,003,832  | 46,014,667  | 1 | 0 | 1 | 0 |
| Case 92 | 3 | 46,016,944  | 60,382,023  | 1 | 1 | 2 | 0 |
| Case 92 | 3 | 60,388,322  | 60,388,743  | 2 | 0 | 2 | 1 |
| Case 92 | 3 | 60,390,846  | 60,501,884  | 0 | 0 | 0 | 0 |
| Case 92 | 3 | 60,503,108  | 65,177,996  | 1 | 1 | 2 | 0 |
| Case 92 | 3 | 65,180,001  | 65,185,849  | 2 | 0 | 2 | 1 |
| Case 92 | 3 | 65,191,847  | 65,214,533  | 0 | 0 | 0 | 0 |
| Case 92 | 3 | 65,215,804  | 82,512,579  | 1 | 1 | 2 | 0 |
| Case 92 | 3 | 82,517,313  | 84,357,635  | 1 | 0 | 1 | 0 |
| Case 92 | 3 | 84,377,718  | 90,442,925  | 1 | 1 | 2 | 0 |
| Case 92 | 3 | 93,537,290  | 111,181,808 | 1 | 1 | 2 | 0 |
| Case 92 | 3 | 111,189,285 | 115,952,799 | 2 | 1 | 3 | 0 |
| Case 92 | 3 | 115,965,295 | 116,413,273 | 1 | 1 | 2 | 0 |
| Case 92 | 3 | 116,420,202 | 117,248,700 | 2 | 1 | 3 | 0 |
| Case 92 | 3 | 117,249,723 | 118,402,091 | 1 | 1 | 2 | 0 |
| Case 92 | 3 | 118,402,543 | 123,728,685 | 2 | 1 | 3 | 0 |
| Case 92 | 3 | 123,734,690 | 124,017,713 | 1 | 1 | 2 | 0 |
| Case 92 | 3 | 124,017,996 | 124,831,048 | 2 | 1 | 3 | 0 |
| Case 92 | 3 | 124,831,327 | 126,757,949 | 1 | 1 | 2 | 0 |
| Case 92 | 3 | 126,759,984 | 144,106,346 | 2 | 1 | 3 | 0 |
| Case 92 | 3 | 144,110,116 | 144,977,599 | 1 | 1 | 2 | 0 |
| Case 92 | 3 | 144,980,846 | 148,562,470 | 2 | 1 | 3 | 0 |
| Case 92 | 3 | 148,563,261 | 149,252,658 | 2 | 2 | 4 | 0 |
| Case 92 | 3 | 149,252,801 | 158,819,701 | 2 | 1 | 3 | 0 |
| Case 92 | 3 | 158,830,704 | 159,557,538 | 2 | 2 | 4 | 0 |
| Case 92 | 3 | 159,557,953 | 167,986,692 | 2 | 1 | 3 | 0 |
| Case 92 | 3 | 167,996,847 | 169,563,001 | 2 | 2 | 4 | 0 |
| Case 92 | 3 | 169,565,571 | 169,639,114 | 2 | 1 | 3 | 0 |
| Case 92 | 3 | 169,643,955 | 171,863,080 | 2 | 2 | 4 | 0 |
| Case 92 | 3 | 171,863,425 | 184,684,029 | 2 | 1 | 3 | 0 |
| Case 92 | 3 | 184,691,216 | 185,184,675 | 2 | 2 | 4 | 0 |
| Case 92 | 3 | 185,184,738 | 197,838,262 | 2 | 1 | 3 | 0 |
| Case 92 | 4 | 71,566      | 844,728     | 2 | 0 | 2 | 1 |
| Case 92 | 4 | 844,834     | 985,296     | 1 | 0 | 1 | 0 |
| Case 92 | 4 | 985,310     | 8,221,220   | 2 | 0 | 2 | 1 |
| Case 92 | 4 | 8,222,157   | 8,239,236   | 1 | 0 | 1 | 0 |
| Case 92 | 4 | 8,239,242   | 28,485,201  | 2 | 0 | 2 | 1 |
| Case 92 | 4 | 28,497,681  | 30,412,195  | 1 | 0 | 1 | 0 |
| Case 92 | 4 | 30,412,285  | 31,784,698  | 2 | 0 | 2 | 1 |
| Case 92 | 4 | 31,785,073  | 35,073,545  | 1 | 0 | 1 | 0 |
| Case 92 | 4 | 35,079,586  | 35,177,867  | 2 | 0 | 2 | 1 |
| Case 92 | 4 | 35,183,361  | 35,689,166  | 1 | 0 | 1 | 0 |
| Case 92 | 4 | 35,698,696  | 43,139,616  | 2 | 0 | 2 | 1 |
| Case 92 | 4 | 43,140,284  | 44,868,270  | 1 | 0 | 1 | 0 |
| Case 92 | 4 | 44,868,481  | 45,503,395  | 2 | 0 | 2 | 1 |
| Case 92 | 4 | 45,507,374  | 46,878,105  | 1 | 0 | 1 | 0 |
| Case 92 | 4 | 46,878,219  | 49,620,898  | 2 | 0 | 2 | 1 |
| Case 92 | 4 | 52,697,856  | 60,512,343  | 2 | 0 | 2 | 1 |
| Case 92 | 4 | 60,521,038  | 61,629,652  | 1 | 0 | 1 | 0 |

|         |   |             |             |   |   |   |   |
|---------|---|-------------|-------------|---|---|---|---|
| Case 92 | 4 | 61,634,572  | 63,341,773  | 2 | 0 | 2 | 1 |
| Case 92 | 4 | 63,350,062  | 66,655,790  | 1 | 0 | 1 | 0 |
| Case 92 | 4 | 66,657,060  | 67,400,568  | 2 | 0 | 2 | 1 |
| Case 92 | 4 | 67,401,602  | 68,193,125  | 1 | 0 | 1 | 0 |
| Case 92 | 4 | 68,198,578  | 69,932,587  | 2 | 0 | 2 | 1 |
| Case 92 | 4 | 69,954,151  | 70,394,123  | 1 | 0 | 1 | 0 |
| Case 92 | 4 | 70,395,452  | 91,158,914  | 2 | 0 | 2 | 1 |
| Case 92 | 4 | 91,164,874  | 93,993,208  | 1 | 0 | 1 | 0 |
| Case 92 | 4 | 93,994,938  | 116,243,567 | 2 | 0 | 2 | 1 |
| Case 92 | 4 | 116,246,035 | 117,326,046 | 1 | 0 | 1 | 0 |
| Case 92 | 4 | 117,374,128 | 118,244,984 | 2 | 0 | 2 | 1 |
| Case 92 | 4 | 118,246,779 | 118,528,622 | 1 | 0 | 1 | 0 |
| Case 92 | 4 | 118,531,857 | 119,462,685 | 2 | 0 | 2 | 1 |
| Case 92 | 4 | 119,483,415 | 122,510,701 | 1 | 1 | 2 | 0 |
| Case 92 | 4 | 122,511,492 | 126,415,914 | 2 | 0 | 2 | 1 |
| Case 92 | 4 | 126,419,726 | 127,779,997 | 1 | 0 | 1 | 0 |
| Case 92 | 4 | 127,788,899 | 131,750,641 | 2 | 0 | 2 | 1 |
| Case 92 | 4 | 131,750,954 | 138,052,684 | 1 | 0 | 1 | 0 |
| Case 92 | 4 | 138,054,384 | 153,896,257 | 2 | 0 | 2 | 1 |
| Case 92 | 4 | 153,896,299 | 153,896,643 | 0 | 0 | 0 | 0 |
| Case 92 | 4 | 153,896,656 | 160,937,416 | 2 | 0 | 2 | 1 |
| Case 92 | 4 | 160,955,059 | 163,046,421 | 1 | 0 | 1 | 0 |
| Case 92 | 4 | 163,048,238 | 163,749,607 | 2 | 0 | 2 | 1 |
| Case 92 | 4 | 163,758,401 | 164,087,797 | 1 | 0 | 1 | 0 |
| Case 92 | 4 | 164,092,042 | 172,338,295 | 2 | 0 | 2 | 1 |
| Case 92 | 4 | 172,338,748 | 172,864,640 | 1 | 0 | 1 | 0 |
| Case 92 | 4 | 172,868,453 | 179,119,001 | 2 | 0 | 2 | 1 |
| Case 92 | 4 | 179,125,887 | 179,938,777 | 1 | 0 | 1 | 0 |
| Case 92 | 4 | 179,940,301 | 180,365,895 | 2 | 0 | 2 | 1 |
| Case 92 | 4 | 180,383,312 | 181,048,589 | 1 | 0 | 1 | 0 |
| Case 92 | 4 | 181,048,849 | 190,963,766 | 2 | 0 | 2 | 1 |
| Case 92 | 5 | 38,139      | 1,656,054   | 3 | 0 | 3 | 1 |
| Case 92 | 5 | 1,659,414   | 1,660,985   | 2 | 1 | 3 | 0 |
| Case 92 | 5 | 1,661,397   | 4,336,158   | 3 | 1 | 4 | 0 |
| Case 92 | 5 | 4,341,114   | 4,814,945   | 3 | 2 | 5 | 0 |
| Case 92 | 5 | 4,819,918   | 4,835,205   | 2 | 1 | 3 | 0 |
| Case 92 | 5 | 4,839,617   | 12,285,739  | 3 | 1 | 4 | 0 |
| Case 92 | 5 | 12,288,541  | 28,640,898  | 3 | 2 | 5 | 0 |
| Case 92 | 5 | 28,644,794  | 33,962,770  | 2 | 2 | 4 | 0 |
| Case 92 | 5 | 33,963,870  | 36,073,812  | 3 | 2 | 5 | 0 |
| Case 92 | 5 | 36,087,610  | 36,087,610  | 2 | 1 | 3 | 0 |
| Case 92 | 5 | 36,088,903  | 36,103,905  | 5 | 2 | 7 | 0 |
| Case 92 | 5 | 36,105,254  | 37,314,379  | 4 | 2 | 6 | 0 |
| Case 92 | 5 | 37,318,135  | 37,882,958  | 2 | 1 | 3 | 0 |
| Case 92 | 5 | 37,887,883  | 44,777,878  | 3 | 1 | 4 | 0 |
| Case 92 | 5 | 44,800,665  | 46,117,770  | 2 | 1 | 3 | 0 |
| Case 92 | 5 | 46,127,095  | 46,378,957  | 1 | 1 | 2 | 0 |
| Case 92 | 5 | 46,399,093  | 46,399,093  | 2 | 0 | 2 | 1 |
| Case 92 | 5 | 49,457,282  | 50,231,548  | 2 | 0 | 2 | 1 |
| Case 92 | 5 | 50,241,241  | 50,336,100  | 1 | 0 | 1 | 0 |
| Case 92 | 5 | 50,340,102  | 51,108,566  | 2 | 0 | 2 | 1 |
| Case 92 | 5 | 51,108,839  | 52,392,774  | 5 | 0 | 5 | 1 |
| Case 92 | 5 | 52,394,439  | 52,408,132  | 2 | 0 | 2 | 1 |
| Case 92 | 5 | 52,409,245  | 130,543,648 | 1 | 0 | 1 | 0 |
| Case 92 | 5 | 130,547,165 | 133,553,379 | 2 | 0 | 2 | 1 |
| Case 92 | 5 | 133,557,876 | 139,747,064 | 1 | 1 | 2 | 0 |
| Case 92 | 5 | 139,747,147 | 139,931,384 | 2 | 0 | 2 | 1 |
| Case 92 | 5 | 139,931,607 | 139,936,825 | 0 | 0 | 0 | 0 |
| Case 92 | 5 | 139,936,835 | 180,693,127 | 1 | 1 | 2 | 0 |
| Case 92 | 6 | 108,666     | 4,734,544   | 2 | 0 | 2 | 1 |
| Case 92 | 6 | 4,735,035   | 5,080,264   | 1 | 0 | 1 | 0 |

|         |   |             |             |   |   |   |   |
|---------|---|-------------|-------------|---|---|---|---|
| Case 92 | 6 | 5,080,904   | 7,332,556   | 2 | 0 | 2 | 1 |
| Case 92 | 6 | 7,335,799   | 7,444,223   | 1 | 0 | 1 | 0 |
| Case 92 | 6 | 7,470,321   | 13,384,746  | 2 | 0 | 2 | 1 |
| Case 92 | 6 | 13,391,155  | 14,608,299  | 1 | 0 | 1 | 0 |
| Case 92 | 6 | 14,613,673  | 15,525,863  | 2 | 0 | 2 | 1 |
| Case 92 | 6 | 15,525,997  | 15,916,856  | 1 | 0 | 1 | 0 |
| Case 92 | 6 | 15,923,183  | 17,507,670  | 2 | 0 | 2 | 1 |
| Case 92 | 6 | 17,507,935  | 17,706,404  | 1 | 0 | 1 | 0 |
| Case 92 | 6 | 17,706,524  | 17,871,852  | 1 | 1 | 2 | 0 |
| Case 92 | 6 | 17,873,622  | 20,733,389  | 4 | 1 | 5 | 0 |
| Case 92 | 6 | 20,734,994  | 21,911,616  | 2 | 1 | 3 | 0 |
| Case 92 | 6 | 21,911,852  | 25,413,828  | 1 | 1 | 2 | 0 |
| Case 92 | 6 | 25,413,922  | 25,811,887  | 2 | 1 | 3 | 0 |
| Case 92 | 6 | 25,811,932  | 29,549,261  | 1 | 1 | 2 | 0 |
| Case 92 | 6 | 29,549,443  | 29,658,864  | 2 | 1 | 3 | 0 |
| Case 92 | 6 | 29,661,456  | 30,893,675  | 2 | 0 | 2 | 1 |
| Case 92 | 6 | 30,893,728  | 31,080,471  | 2 | 1 | 3 | 0 |
| Case 92 | 6 | 31,080,586  | 31,502,861  | 2 | 0 | 2 | 1 |
| Case 92 | 6 | 31,504,546  | 31,735,265  | 2 | 1 | 3 | 0 |
| Case 92 | 6 | 31,735,456  | 34,530,165  | 2 | 0 | 2 | 1 |
| Case 92 | 6 | 34,531,300  | 36,336,764  | 2 | 1 | 3 | 0 |
| Case 92 | 6 | 36,336,803  | 36,786,072  | 2 | 0 | 2 | 1 |
| Case 92 | 6 | 36,787,859  | 36,831,569  | 2 | 1 | 3 | 0 |
| Case 92 | 6 | 36,839,598  | 37,719,060  | 5 | 0 | 5 | 1 |
| Case 92 | 6 | 37,723,353  | 37,726,077  | 2 | 1 | 3 | 0 |
| Case 92 | 6 | 37,726,524  | 37,726,524  | 5 | 0 | 5 | 1 |
| Case 92 | 6 | 37,727,508  | 38,954,145  | 5 | 1 | 6 | 0 |
| Case 92 | 6 | 38,956,892  | 41,664,501  | 3 | 2 | 5 | 0 |
| Case 92 | 6 | 41,665,506  | 41,694,772  | 6 | 1 | 7 | 0 |
| Case 92 | 6 | 41,698,134  | 43,129,986  | 6 | 0 | 6 | 1 |
| Case 92 | 6 | 43,141,786  | 43,144,618  | 3 | 0 | 3 | 1 |
| Case 92 | 6 | 43,146,387  | 43,173,908  | 1 | 1 | 2 | 0 |
| Case 92 | 6 | 43,174,153  | 43,182,985  | 2 | 1 | 3 | 0 |
| Case 92 | 6 | 43,183,913  | 44,270,171  | 6 | 0 | 6 | 1 |
| Case 92 | 6 | 44,270,175  | 46,009,132  | 5 | 1 | 6 | 0 |
| Case 92 | 6 | 46,010,683  | 46,022,074  | 3 | 2 | 5 | 0 |
| Case 92 | 6 | 46,027,383  | 50,869,777  | 6 | 1 | 7 | 0 |
| Case 92 | 6 | 50,892,728  | 50,892,728  | 6 | 0 | 6 | 1 |
| Case 92 | 6 | 50,902,596  | 50,911,334  | 3 | 0 | 3 | 1 |
| Case 92 | 6 | 50,921,271  | 52,630,110  | 7 | 0 | 7 | 1 |
| Case 92 | 6 | 52,631,094  | 52,631,094  | 2 | 1 | 3 | 0 |
| Case 92 | 6 | 52,631,188  | 57,227,695  | 6 | 0 | 6 | 1 |
| Case 92 | 6 | 57,228,363  | 58,150,777  | 3 | 0 | 3 | 1 |
| Case 92 | 6 | 58,168,152  | 58,711,541  | 7 | 0 | 7 | 1 |
| Case 92 | 6 | 58,719,796  | 58,752,089  | 2 | 1 | 3 | 0 |
| Case 92 | 6 | 61,891,118  | 64,808,231  | 2 | 1 | 3 | 0 |
| Case 92 | 6 | 64,827,523  | 99,776,986  | 2 | 0 | 2 | 1 |
| Case 92 | 6 | 99,781,218  | 100,010,747 | 1 | 0 | 1 | 0 |
| Case 92 | 6 | 100,022,125 | 100,961,198 | 2 | 0 | 2 | 1 |
| Case 92 | 6 | 100,964,057 | 104,587,040 | 1 | 0 | 1 | 0 |
| Case 92 | 6 | 104,592,769 | 111,977,860 | 2 | 0 | 2 | 1 |
| Case 92 | 6 | 111,978,744 | 112,382,324 | 3 | 0 | 3 | 1 |
| Case 92 | 6 | 112,382,393 | 120,222,329 | 2 | 0 | 2 | 1 |
| Case 92 | 6 | 120,229,469 | 120,871,846 | 1 | 0 | 1 | 0 |
| Case 92 | 6 | 120,879,066 | 121,644,362 | 2 | 0 | 2 | 1 |
| Case 92 | 6 | 121,653,046 | 122,763,602 | 1 | 0 | 1 | 0 |
| Case 92 | 6 | 122,765,026 | 123,697,583 | 2 | 0 | 2 | 1 |
| Case 92 | 6 | 123,699,019 | 123,941,672 | 1 | 0 | 1 | 0 |
| Case 92 | 6 | 123,945,300 | 124,376,164 | 2 | 0 | 2 | 1 |
| Case 92 | 6 | 124,376,272 | 124,698,568 | 1 | 0 | 1 | 0 |
| Case 92 | 6 | 124,699,827 | 140,863,146 | 2 | 0 | 2 | 1 |

|         |   |             |             |   |   |   |   |
|---------|---|-------------|-------------|---|---|---|---|
| Case 92 | 6 | 140,864,558 | 142,169,481 | 1 | 0 | 1 | 0 |
| Case 92 | 6 | 142,169,787 | 144,794,928 | 2 | 0 | 2 | 1 |
| Case 92 | 6 | 144,800,952 | 145,267,460 | 1 | 0 | 1 | 0 |
| Case 92 | 6 | 145,276,644 | 153,586,473 | 2 | 0 | 2 | 1 |
| Case 92 | 6 | 153,587,328 | 153,830,536 | 1 | 0 | 1 | 0 |
| Case 92 | 6 | 153,833,568 | 162,746,359 | 2 | 0 | 2 | 1 |
| Case 92 | 6 | 162,748,555 | 163,569,272 | 1 | 0 | 1 | 0 |
| Case 92 | 6 | 163,573,298 | 168,439,333 | 2 | 0 | 2 | 1 |
| Case 92 | 6 | 168,439,373 | 168,464,378 | 1 | 0 | 1 | 0 |
| Case 92 | 6 | 168,464,381 | 170,980,171 | 2 | 0 | 2 | 1 |
| Case 92 | 7 | 44,935      | 3,140,464   | 3 | 1 | 4 | 0 |
| Case 92 | 7 | 3,145,429   | 3,836,379   | 3 | 2 | 5 | 0 |
| Case 92 | 7 | 3,839,029   | 6,639,612   | 2 | 2 | 4 | 0 |
| Case 92 | 7 | 6,647,725   | 22,164,444  | 3 | 2 | 5 | 0 |
| Case 92 | 7 | 22,165,180  | 30,796,530  | 6 | 1 | 7 | 0 |
| Case 92 | 7 | 30,800,679  | 31,123,789  | 4 | 1 | 5 | 0 |
| Case 92 | 7 | 31,124,376  | 31,124,376  | 2 | 1 | 3 | 0 |
| Case 92 | 7 | 31,126,580  | 31,522,993  | 5 | 2 | 7 | 0 |
| Case 92 | 7 | 31,526,529  | 33,042,945  | 4 | 2 | 6 | 0 |
| Case 92 | 7 | 33,052,218  | 33,052,218  | 2 | 1 | 3 | 0 |
| Case 92 | 7 | 33,053,281  | 33,767,012  | 5 | 2 | 7 | 0 |
| Case 92 | 7 | 33,769,056  | 35,908,372  | 4 | 2 | 6 | 0 |
| Case 92 | 7 | 35,920,755  | 39,894,883  | 4 | 1 | 5 | 0 |
| Case 92 | 7 | 39,913,870  | 44,333,582  | 2 | 1 | 3 | 0 |
| Case 92 | 7 | 44,339,406  | 45,724,696  | 3 | 1 | 4 | 0 |
| Case 92 | 7 | 45,726,156  | 45,747,949  | 2 | 1 | 3 | 0 |
| Case 92 | 7 | 45,748,520  | 47,840,381  | 5 | 2 | 7 | 0 |
| Case 92 | 7 | 47,840,387  | 47,886,707  | 3 | 2 | 5 | 0 |
| Case 92 | 7 | 47,892,736  | 48,789,559  | 6 | 1 | 7 | 0 |
| Case 92 | 7 | 48,801,250  | 48,850,787  | 4 | 1 | 5 | 0 |
| Case 92 | 7 | 48,850,987  | 48,850,987  | 2 | 1 | 3 | 0 |
| Case 92 | 7 | 48,852,331  | 56,125,757  | 4 | 2 | 6 | 0 |
| Case 92 | 7 | 56,125,762  | 56,394,784  | 4 | 1 | 5 | 0 |
| Case 92 | 7 | 56,437,045  | 58,019,061  | 2 | 1 | 3 | 0 |
| Case 92 | 7 | 61,056,053  | 65,466,565  | 2 | 1 | 3 | 0 |
| Case 92 | 7 | 65,515,276  | 66,474,576  | 3 | 0 | 3 | 1 |
| Case 92 | 7 | 66,479,228  | 67,249,701  | 2 | 1 | 3 | 0 |
| Case 92 | 7 | 67,255,748  | 68,384,522  | 3 | 1 | 4 | 0 |
| Case 92 | 7 | 68,385,861  | 70,040,558  | 2 | 1 | 3 | 0 |
| Case 92 | 7 | 70,043,551  | 70,493,364  | 3 | 1 | 4 | 0 |
| Case 92 | 7 | 70,500,643  | 73,097,720  | 2 | 1 | 3 | 0 |
| Case 92 | 7 | 73,098,119  | 75,511,134  | 3 | 0 | 3 | 1 |
| Case 92 | 7 | 75,511,203  | 77,012,042  | 2 | 1 | 3 | 0 |
| Case 92 | 7 | 77,013,594  | 81,591,716  | 3 | 1 | 4 | 0 |
| Case 92 | 7 | 81,593,384  | 82,342,937  | 2 | 1 | 3 | 0 |
| Case 92 | 7 | 82,347,290  | 82,595,219  | 6 | 0 | 6 | 1 |
| Case 92 | 7 | 82,595,242  | 82,595,435  | 3 | 0 | 3 | 1 |
| Case 92 | 7 | 82,595,653  | 83,144,112  | 7 | 0 | 7 | 1 |
| Case 92 | 7 | 83,147,251  | 85,194,414  | 2 | 1 | 3 | 0 |
| Case 92 | 7 | 85,203,213  | 85,624,839  | 3 | 1 | 4 | 0 |
| Case 92 | 7 | 85,631,245  | 87,005,269  | 2 | 1 | 3 | 0 |
| Case 92 | 7 | 87,006,567  | 90,161,308  | 3 | 1 | 4 | 0 |
| Case 92 | 7 | 90,163,753  | 92,763,913  | 2 | 1 | 3 | 0 |
| Case 92 | 7 | 92,764,069  | 94,038,649  | 3 | 1 | 4 | 0 |
| Case 92 | 7 | 94,038,721  | 95,142,280  | 2 | 1 | 3 | 0 |
| Case 92 | 7 | 95,145,428  | 97,480,919  | 3 | 1 | 4 | 0 |
| Case 92 | 7 | 97,482,484  | 99,429,843  | 3 | 0 | 3 | 1 |
| Case 92 | 7 | 99,436,198  | 103,162,722 | 2 | 1 | 3 | 0 |
| Case 92 | 7 | 103,162,847 | 104,460,747 | 3 | 1 | 4 | 0 |
| Case 92 | 7 | 104,461,230 | 105,221,097 | 2 | 1 | 3 | 0 |
| Case 92 | 7 | 105,226,180 | 106,642,123 | 3 | 1 | 4 | 0 |

|         |   |             |             |   |   |   |   |
|---------|---|-------------|-------------|---|---|---|---|
| Case 92 | 7 | 106,656,845 | 107,330,665 | 2 | 1 | 3 | 0 |
| Case 92 | 7 | 107,334,026 | 108,108,759 | 3 | 1 | 4 | 0 |
| Case 92 | 7 | 108,108,830 | 109,098,364 | 2 | 1 | 3 | 0 |
| Case 92 | 7 | 109,101,870 | 111,967,040 | 3 | 1 | 4 | 0 |
| Case 92 | 7 | 111,970,228 | 111,986,803 | 3 | 0 | 3 | 1 |
| Case 92 | 7 | 111,999,497 | 112,295,954 | 7 | 0 | 7 | 1 |
| Case 92 | 7 | 112,308,895 | 114,654,542 | 2 | 1 | 3 | 0 |
| Case 92 | 7 | 114,655,780 | 115,897,406 | 3 | 1 | 4 | 0 |
| Case 92 | 7 | 115,897,884 | 116,296,896 | 3 | 0 | 3 | 1 |
| Case 92 | 7 | 116,312,100 | 117,917,719 | 7 | 0 | 7 | 1 |
| Case 92 | 7 | 117,938,370 | 120,136,191 | 2 | 1 | 3 | 0 |
| Case 92 | 7 | 120,143,507 | 121,601,907 | 3 | 1 | 4 | 0 |
| Case 92 | 7 | 121,604,718 | 121,668,320 | 2 | 1 | 3 | 0 |
| Case 92 | 7 | 121,671,536 | 140,690,296 | 1 | 1 | 2 | 0 |
| Case 92 | 7 | 140,690,655 | 142,959,299 | 2 | 1 | 3 | 0 |
| Case 92 | 7 | 142,960,626 | 149,511,985 | 1 | 1 | 2 | 0 |
| Case 92 | 7 | 149,512,177 | 149,520,896 | 1 | 0 | 1 | 0 |
| Case 92 | 7 | 149,521,199 | 155,973,733 | 1 | 1 | 2 | 0 |
| Case 92 | 7 | 155,974,701 | 156,231,105 | 2 | 1 | 3 | 0 |
| Case 92 | 7 | 156,236,883 | 156,743,045 | 1 | 1 | 2 | 0 |
| Case 92 | 7 | 156,743,173 | 157,208,772 | 2 | 1 | 3 | 0 |
| Case 92 | 7 | 157,208,773 | 157,435,421 | 1 | 1 | 2 | 0 |
| Case 92 | 7 | 157,437,584 | 157,825,009 | 2 | 1 | 3 | 0 |
| Case 92 | 7 | 157,827,547 | 158,109,576 | 2 | 0 | 2 | 1 |
| Case 92 | 7 | 158,113,390 | 159,119,486 | 2 | 1 | 3 | 0 |
| Case 92 | 8 | 164,984     | 642,586     | 1 | 0 | 1 | 0 |
| Case 92 | 8 | 642,842     | 2,808,265   | 1 | 1 | 2 | 0 |
| Case 92 | 8 | 2,808,520   | 5,491,128   | 1 | 0 | 1 | 0 |
| Case 92 | 8 | 5,491,721   | 5,608,667   | 1 | 1 | 2 | 0 |
| Case 92 | 8 | 5,608,718   | 5,973,842   | 1 | 0 | 1 | 0 |
| Case 92 | 8 | 5,981,454   | 6,082,233   | 1 | 1 | 2 | 0 |
| Case 92 | 8 | 6,084,048   | 6,232,009   | 2 | 0 | 2 | 1 |
| Case 92 | 8 | 6,232,277   | 8,171,978   | 1 | 1 | 2 | 0 |
| Case 92 | 8 | 8,173,997   | 8,241,316   | 1 | 0 | 1 | 0 |
| Case 92 | 8 | 8,241,772   | 9,157,884   | 1 | 1 | 2 | 0 |
| Case 92 | 8 | 9,158,475   | 9,293,694   | 2 | 0 | 2 | 1 |
| Case 92 | 8 | 9,294,503   | 9,783,789   | 1 | 0 | 1 | 0 |
| Case 92 | 8 | 9,785,503   | 10,295,378  | 1 | 1 | 2 | 0 |
| Case 92 | 8 | 10,297,819  | 10,474,055  | 1 | 0 | 1 | 0 |
| Case 92 | 8 | 10,480,101  | 11,105,761  | 1 | 1 | 2 | 0 |
| Case 92 | 8 | 11,110,503  | 11,391,650  | 1 | 0 | 1 | 0 |
| Case 92 | 8 | 11,394,233  | 11,616,836  | 1 | 1 | 2 | 0 |
| Case 92 | 8 | 11,617,142  | 17,982,155  | 2 | 0 | 2 | 1 |
| Case 92 | 8 | 17,983,723  | 18,717,366  | 1 | 0 | 1 | 0 |
| Case 92 | 8 | 18,717,503  | 19,106,346  | 1 | 1 | 2 | 0 |
| Case 92 | 8 | 19,107,092  | 20,110,915  | 1 | 0 | 1 | 0 |
| Case 92 | 8 | 20,112,355  | 21,964,378  | 1 | 1 | 2 | 0 |
| Case 92 | 8 | 21,964,561  | 22,546,561  | 1 | 0 | 1 | 0 |
| Case 92 | 8 | 22,548,029  | 23,872,706  | 1 | 1 | 2 | 0 |
| Case 92 | 8 | 23,872,847  | 24,571,548  | 1 | 0 | 1 | 0 |
| Case 92 | 8 | 24,580,132  | 27,514,397  | 1 | 1 | 2 | 0 |
| Case 92 | 8 | 27,516,046  | 27,711,673  | 1 | 0 | 1 | 0 |
| Case 92 | 8 | 27,715,116  | 27,950,736  | 1 | 1 | 2 | 0 |
| Case 92 | 8 | 27,951,556  | 33,246,504  | 1 | 0 | 1 | 0 |
| Case 92 | 8 | 33,246,538  | 39,648,002  | 1 | 1 | 2 | 0 |
| Case 92 | 8 | 39,660,582  | 43,046,738  | 2 | 1 | 3 | 0 |
| Case 92 | 8 | 43,047,400  | 43,791,691  | 3 | 0 | 3 | 1 |
| Case 92 | 8 | 46,886,735  | 91,132,141  | 3 | 0 | 3 | 1 |
| Case 92 | 8 | 91,133,678  | 91,142,473  | 2 | 0 | 2 | 1 |
| Case 92 | 8 | 91,151,614  | 91,214,786  | 0 | 0 | 0 | 0 |
| Case 92 | 8 | 91,222,654  | 102,330,393 | 3 | 0 | 3 | 1 |

|         |   |             |             |   |   |   |   |
|---------|---|-------------|-------------|---|---|---|---|
| Case 92 | 8 | 102,335,433 | 102,358,215 | 2 | 1 | 3 | 0 |
| Case 92 | 8 | 102,358,879 | 103,599,696 | 3 | 1 | 4 | 0 |
| Case 92 | 8 | 103,600,030 | 119,247,995 | 3 | 0 | 3 | 1 |
| Case 92 | 8 | 119,248,227 | 120,503,347 | 2 | 2 | 4 | 0 |
| Case 92 | 8 | 120,506,546 | 126,464,388 | 2 | 1 | 3 | 0 |
| Case 92 | 8 | 126,465,305 | 130,432,856 | 3 | 1 | 4 | 0 |
| Case 92 | 8 | 130,450,346 | 146,293,414 | 3 | 0 | 3 | 1 |
| Case 92 | 9 | 46,587      | 289,061     | 1 | 0 | 1 | 0 |
| Case 92 | 9 | 289,555     | 517,563     | 2 | 0 | 2 | 1 |
| Case 92 | 9 | 517,715     | 679,728     | 1 | 0 | 1 | 0 |
| Case 92 | 9 | 679,901     | 4,943,454   | 2 | 0 | 2 | 1 |
| Case 92 | 9 | 4,946,989   | 5,302,095   | 1 | 0 | 1 | 0 |
| Case 92 | 9 | 5,306,824   | 9,186,346   | 2 | 0 | 2 | 1 |
| Case 92 | 9 | 9,187,539   | 9,436,044   | 1 | 0 | 1 | 0 |
| Case 92 | 9 | 9,436,595   | 9,800,624   | 2 | 0 | 2 | 1 |
| Case 92 | 9 | 9,801,153   | 10,102,903  | 1 | 0 | 1 | 0 |
| Case 92 | 9 | 10,107,399  | 10,284,628  | 2 | 0 | 2 | 1 |
| Case 92 | 9 | 10,285,562  | 10,391,459  | 1 | 0 | 1 | 0 |
| Case 92 | 9 | 10,391,604  | 11,070,804  | 2 | 0 | 2 | 1 |
| Case 92 | 9 | 11,073,873  | 12,195,026  | 1 | 0 | 1 | 0 |
| Case 92 | 9 | 12,197,936  | 17,243,746  | 2 | 0 | 2 | 1 |
| Case 92 | 9 | 17,250,170  | 17,474,085  | 1 | 0 | 1 | 0 |
| Case 92 | 9 | 17,480,669  | 18,955,861  | 2 | 0 | 2 | 1 |
| Case 92 | 9 | 18,956,317  | 19,206,930  | 1 | 0 | 1 | 0 |
| Case 92 | 9 | 19,211,852  | 21,371,264  | 2 | 0 | 2 | 1 |
| Case 92 | 9 | 21,381,286  | 21,536,423  | 1 | 0 | 1 | 0 |
| Case 92 | 9 | 21,543,444  | 22,228,756  | 2 | 0 | 2 | 1 |
| Case 92 | 9 | 22,237,616  | 22,770,044  | 1 | 0 | 1 | 0 |
| Case 92 | 9 | 22,774,651  | 23,081,882  | 2 | 0 | 2 | 1 |
| Case 92 | 9 | 23,082,438  | 23,242,643  | 1 | 0 | 1 | 0 |
| Case 92 | 9 | 23,245,863  | 23,513,235  | 1 | 1 | 2 | 0 |
| Case 92 | 9 | 23,515,334  | 24,113,936  | 2 | 0 | 2 | 1 |
| Case 92 | 9 | 24,121,196  | 24,635,445  | 1 | 0 | 1 | 0 |
| Case 92 | 9 | 24,651,946  | 25,142,445  | 1 | 1 | 2 | 0 |
| Case 92 | 9 | 25,143,480  | 25,325,829  | 2 | 1 | 3 | 0 |
| Case 92 | 9 | 25,325,895  | 25,363,830  | 2 | 0 | 2 | 1 |
| Case 92 | 9 | 25,368,388  | 25,691,032  | 1 | 0 | 1 | 0 |
| Case 92 | 9 | 25,692,824  | 26,110,570  | 2 | 0 | 2 | 1 |
| Case 92 | 9 | 26,110,869  | 28,164,645  | 1 | 1 | 2 | 0 |
| Case 92 | 9 | 28,173,138  | 30,038,860  | 2 | 0 | 2 | 1 |
| Case 92 | 9 | 30,039,545  | 30,982,620  | 1 | 0 | 1 | 0 |
| Case 92 | 9 | 30,983,100  | 46,944,322  | 2 | 0 | 2 | 1 |
| Case 92 | 9 | 65,629,772  | 69,108,060  | 2 | 0 | 2 | 1 |
| Case 92 | 9 | 69,238,239  | 71,152,201  | 1 | 1 | 2 | 0 |
| Case 92 | 9 | 71,152,302  | 71,867,731  | 2 | 1 | 3 | 0 |
| Case 92 | 9 | 71,867,801  | 73,028,766  | 1 | 1 | 2 | 0 |
| Case 92 | 9 | 73,029,831  | 73,378,890  | 2 | 1 | 3 | 0 |
| Case 92 | 9 | 73,388,919  | 73,602,628  | 1 | 1 | 2 | 0 |
| Case 92 | 9 | 73,610,288  | 82,780,965  | 2 | 0 | 2 | 1 |
| Case 92 | 9 | 82,781,519  | 83,514,230  | 1 | 0 | 1 | 0 |
| Case 92 | 9 | 83,524,227  | 127,572,229 | 2 | 0 | 2 | 1 |
| Case 92 | 9 | 127,572,304 | 130,039,406 | 2 | 1 | 3 | 0 |
| Case 92 | 9 | 130,044,420 | 131,083,883 | 2 | 0 | 2 | 1 |
| Case 92 | 9 | 131,083,925 | 133,901,815 | 3 | 0 | 3 | 1 |
| Case 92 | 9 | 133,901,819 | 133,948,176 | 2 | 0 | 2 | 1 |
| Case 92 | 9 | 133,948,179 | 137,280,939 | 3 | 0 | 3 | 1 |
| Case 92 | 9 | 137,284,923 | 137,384,140 | 2 | 0 | 2 | 1 |
| Case 92 | 9 | 137,385,159 | 139,220,876 | 3 | 0 | 3 | 1 |
| Case 92 | 9 | 139,225,139 | 139,295,091 | 2 | 0 | 2 | 1 |
| Case 92 | 9 | 139,295,282 | 139,371,031 | 3 | 0 | 3 | 1 |
| Case 92 | 9 | 139,371,049 | 140,509,302 | 2 | 0 | 2 | 1 |

|         |    |             |             |   |   |   |   |
|---------|----|-------------|-------------|---|---|---|---|
| Case 92 | 9  | 140,509,351 | 141,008,876 | 3 | 0 | 3 | 1 |
| Case 92 | 9  | 141,009,015 | 141,066,491 | 2 | 0 | 2 | 1 |
| Case 92 | 10 | 98,087      | 36,511,451  | 2 | 1 | 3 | 0 |
| Case 92 | 10 | 36,514,772  | 39,097,912  | 2 | 0 | 2 | 1 |
| Case 92 | 10 | 42,436,301  | 54,617,058  | 2 | 0 | 2 | 1 |
| Case 92 | 10 | 54,629,374  | 62,176,933  | 2 | 1 | 3 | 0 |
| Case 92 | 10 | 62,177,839  | 76,180,335  | 2 | 2 | 4 | 0 |
| Case 92 | 10 | 76,186,852  | 102,824,349 | 2 | 0 | 2 | 1 |
| Case 92 | 10 | 102,824,367 | 103,746,504 | 3 | 0 | 3 | 1 |
| Case 92 | 10 | 103,747,138 | 104,597,057 | 2 | 0 | 2 | 1 |
| Case 92 | 10 | 104,597,152 | 104,849,468 | 3 | 0 | 3 | 1 |
| Case 92 | 10 | 104,849,496 | 105,362,790 | 2 | 0 | 2 | 1 |
| Case 92 | 10 | 105,362,954 | 105,634,895 | 3 | 0 | 3 | 1 |
| Case 92 | 10 | 105,636,989 | 106,253,793 | 2 | 0 | 2 | 1 |
| Case 92 | 10 | 106,255,540 | 107,357,563 | 3 | 0 | 3 | 1 |
| Case 92 | 10 | 107,366,881 | 108,202,638 | 2 | 0 | 2 | 1 |
| Case 92 | 10 | 108,208,880 | 108,432,828 | 3 | 0 | 3 | 1 |
| Case 92 | 10 | 108,439,103 | 111,428,184 | 2 | 0 | 2 | 1 |
| Case 92 | 10 | 111,429,236 | 112,532,592 | 3 | 0 | 3 | 1 |
| Case 92 | 10 | 112,532,796 | 135,477,883 | 2 | 2 | 4 | 0 |
| Case 92 | 11 | 193,146     | 9,606,888   | 3 | 0 | 3 | 1 |
| Case 92 | 11 | 9,607,032   | 16,189,326  | 3 | 1 | 4 | 0 |
| Case 92 | 11 | 16,200,444  | 19,077,786  | 3 | 0 | 3 | 1 |
| Case 92 | 11 | 19,077,823  | 20,070,441  | 3 | 1 | 4 | 0 |
| Case 92 | 11 | 20,070,533  | 20,629,164  | 3 | 0 | 3 | 1 |
| Case 92 | 11 | 20,629,169  | 20,648,020  | 2 | 1 | 3 | 0 |
| Case 92 | 11 | 20,648,364  | 20,650,162  | 3 | 0 | 3 | 1 |
| Case 92 | 11 | 20,652,620  | 21,358,546  | 3 | 1 | 4 | 0 |
| Case 92 | 11 | 21,360,104  | 21,936,812  | 3 | 0 | 3 | 1 |
| Case 92 | 11 | 21,945,004  | 21,952,288  | 2 | 1 | 3 | 0 |
| Case 92 | 11 | 21,954,905  | 22,608,265  | 3 | 1 | 4 | 0 |
| Case 92 | 11 | 22,613,389  | 25,077,951  | 3 | 0 | 3 | 1 |
| Case 92 | 11 | 25,078,894  | 25,101,688  | 2 | 1 | 3 | 0 |
| Case 92 | 11 | 25,102,331  | 28,058,043  | 3 | 1 | 4 | 0 |
| Case 92 | 11 | 28,070,798  | 37,706,893  | 2 | 1 | 3 | 0 |
| Case 92 | 11 | 37,746,335  | 40,029,625  | 1 | 1 | 2 | 0 |
| Case 92 | 11 | 40,032,861  | 48,646,903  | 2 | 1 | 3 | 0 |
| Case 92 | 11 | 48,647,107  | 49,964,146  | 2 | 0 | 2 | 1 |
| Case 92 | 11 | 49,965,330  | 51,591,253  | 2 | 1 | 3 | 0 |
| Case 92 | 11 | 54,794,237  | 55,819,721  | 2 | 1 | 3 | 0 |
| Case 92 | 11 | 55,834,132  | 58,572,797  | 1 | 1 | 2 | 0 |
| Case 92 | 11 | 58,575,572  | 60,617,715  | 2 | 1 | 3 | 0 |
| Case 92 | 11 | 60,618,134  | 60,704,125  | 2 | 0 | 2 | 1 |
| Case 92 | 11 | 60,704,154  | 63,974,966  | 2 | 1 | 3 | 0 |
| Case 92 | 11 | 63,978,128  | 64,120,895  | 1 | 1 | 2 | 0 |
| Case 92 | 11 | 64,120,958  | 64,434,956  | 2 | 1 | 3 | 0 |
| Case 92 | 11 | 64,434,997  | 64,840,865  | 2 | 0 | 2 | 1 |
| Case 92 | 11 | 64,842,015  | 65,320,709  | 2 | 1 | 3 | 0 |
| Case 92 | 11 | 65,321,172  | 65,547,791  | 2 | 0 | 2 | 1 |
| Case 92 | 11 | 65,549,906  | 67,075,354  | 2 | 1 | 3 | 0 |
| Case 92 | 11 | 67,075,412  | 67,294,198  | 1 | 1 | 2 | 0 |
| Case 92 | 11 | 67,294,983  | 67,472,145  | 2 | 1 | 3 | 0 |
| Case 92 | 11 | 67,472,905  | 67,472,905  | 2 | 0 | 2 | 1 |
| Case 92 | 11 | 67,501,626  | 67,731,956  | 0 | 0 | 0 | 0 |
| Case 92 | 11 | 67,748,817  | 67,816,675  | 1 | 1 | 2 | 0 |
| Case 92 | 11 | 67,816,757  | 80,201,279  | 2 | 1 | 3 | 0 |
| Case 92 | 11 | 80,201,641  | 82,462,980  | 1 | 1 | 2 | 0 |
| Case 92 | 11 | 82,463,056  | 83,104,179  | 2 | 1 | 3 | 0 |
| Case 92 | 11 | 83,121,983  | 85,263,724  | 1 | 1 | 2 | 0 |
| Case 92 | 11 | 85,266,321  | 86,522,992  | 2 | 1 | 3 | 0 |
| Case 92 | 11 | 86,525,173  | 92,005,611  | 1 | 1 | 2 | 0 |



|         |    |             |             |   |   |   |   |
|---------|----|-------------|-------------|---|---|---|---|
| Case 92 | 11 | 92,016,605  | 92,623,349  | 2 | 1 | 3 | 0 |
| Case 92 | 11 | 92,623,798  | 93,382,187  | 1 | 1 | 2 | 0 |
| Case 92 | 11 | 93,390,929  | 94,539,347  | 2 | 1 | 3 | 0 |
| Case 92 | 11 | 94,547,748  | 94,806,722  | 2 | 0 | 2 | 1 |
| Case 92 | 11 | 94,807,261  | 94,890,994  | 5 | 0 | 5 | 1 |
| Case 92 | 11 | 94,894,963  | 96,116,597  | 6 | 1 | 7 | 0 |
| Case 92 | 11 | 96,117,149  | 96,119,605  | 7 | 0 | 7 | 1 |
| Case 92 | 11 | 96,124,337  | 96,124,337  | 6 | 0 | 6 | 1 |
| Case 92 | 11 | 96,125,155  | 109,682,445 | 7 | 0 | 7 | 1 |
| Case 92 | 11 | 109,694,723 | 113,269,727 | 2 | 1 | 3 | 0 |
| Case 92 | 11 | 113,269,742 | 113,607,367 | 1 | 1 | 2 | 0 |
| Case 92 | 11 | 113,607,414 | 119,045,300 | 2 | 1 | 3 | 0 |
| Case 92 | 11 | 119,045,372 | 122,848,366 | 2 | 0 | 2 | 1 |
| Case 92 | 11 | 122,848,541 | 124,012,332 | 2 | 1 | 3 | 0 |
| Case 92 | 11 | 124,012,404 | 124,602,247 | 3 | 1 | 4 | 0 |
| Case 92 | 11 | 124,605,290 | 126,360,303 | 2 | 1 | 3 | 0 |
| Case 92 | 11 | 126,360,403 | 127,532,335 | 3 | 1 | 4 | 0 |
| Case 92 | 11 | 127,532,905 | 128,245,331 | 1 | 1 | 2 | 0 |
| Case 92 | 11 | 128,248,555 | 130,861,244 | 2 | 1 | 3 | 0 |
| Case 92 | 11 | 130,867,460 | 134,395,242 | 2 | 0 | 2 | 1 |
| Case 92 | 11 | 134,399,760 | 134,934,063 | 1 | 0 | 1 | 0 |
| Case 92 | 12 | 191,619     | 12,630,584  | 2 | 0 | 2 | 1 |
| Case 92 | 12 | 12,630,641  | 12,944,138  | 1 | 0 | 1 | 0 |
| Case 92 | 12 | 12,949,882  | 13,083,137  | 2 | 0 | 2 | 1 |
| Case 92 | 12 | 13,087,061  | 33,517,984  | 1 | 0 | 1 | 0 |
| Case 92 | 12 | 33,529,062  | 34,754,757  | 1 | 1 | 2 | 0 |
| Case 92 | 12 | 34,756,688  | 34,853,011  | 2 | 0 | 2 | 1 |
| Case 92 | 12 | 37,876,400  | 37,961,768  | 2 | 0 | 2 | 1 |
| Case 92 | 12 | 38,072,773  | 38,514,872  | 0 | 0 | 0 | 0 |
| Case 92 | 12 | 38,528,487  | 65,723,922  | 1 | 1 | 2 | 0 |
| Case 92 | 12 | 65,724,724  | 75,082,897  | 2 | 1 | 3 | 0 |
| Case 92 | 12 | 75,083,361  | 129,849,900 | 1 | 1 | 2 | 0 |
| Case 92 | 12 | 129,850,054 | 130,720,806 | 2 | 1 | 3 | 0 |
| Case 92 | 12 | 130,721,733 | 132,562,275 | 1 | 1 | 2 | 0 |
| Case 92 | 12 | 132,562,291 | 133,810,935 | 3 | 0 | 3 | 1 |
| Case 92 | 13 | 19,058,717  | 20,038,614  | 4 | 1 | 5 | 0 |
| Case 92 | 13 | 20,039,679  | 25,656,521  | 2 | 1 | 3 | 0 |
| Case 92 | 13 | 25,659,182  | 25,933,438  | 3 | 1 | 4 | 0 |
| Case 92 | 13 | 25,946,418  | 32,226,399  | 2 | 2 | 4 | 0 |
| Case 92 | 13 | 32,228,725  | 58,063,367  | 3 | 1 | 4 | 0 |
| Case 92 | 13 | 58,070,399  | 67,838,330  | 4 | 0 | 4 | 1 |
| Case 92 | 13 | 67,842,588  | 69,462,019  | 3 | 0 | 3 | 1 |
| Case 92 | 13 | 69,470,652  | 70,735,399  | 4 | 0 | 4 | 1 |
| Case 92 | 13 | 70,744,882  | 71,266,385  | 3 | 0 | 3 | 1 |
| Case 92 | 13 | 71,266,458  | 73,269,449  | 4 | 0 | 4 | 1 |
| Case 92 | 13 | 73,271,699  | 73,636,590  | 3 | 0 | 3 | 1 |
| Case 92 | 13 | 73,636,621  | 74,181,440  | 4 | 0 | 4 | 1 |
| Case 92 | 13 | 74,181,934  | 107,140,910 | 3 | 0 | 3 | 1 |
| Case 92 | 13 | 107,144,320 | 107,892,697 | 4 | 0 | 4 | 1 |
| Case 92 | 13 | 107,895,045 | 107,959,766 | 3 | 0 | 3 | 1 |
| Case 92 | 13 | 107,961,995 | 109,492,501 | 4 | 0 | 4 | 1 |
| Case 92 | 13 | 109,496,813 | 109,707,827 | 3 | 0 | 3 | 1 |
| Case 92 | 13 | 109,708,218 | 112,875,786 | 4 | 0 | 4 | 1 |
| Case 92 | 13 | 112,878,710 | 113,090,474 | 3 | 0 | 3 | 1 |
| Case 92 | 13 | 113,091,550 | 113,306,882 | 4 | 0 | 4 | 1 |
| Case 92 | 13 | 113,310,547 | 113,574,780 | 3 | 0 | 3 | 1 |
| Case 92 | 13 | 113,581,825 | 113,707,658 | 4 | 0 | 4 | 1 |
| Case 92 | 13 | 113,709,773 | 113,803,479 | 3 | 0 | 3 | 1 |
| Case 92 | 13 | 113,810,186 | 114,256,280 | 4 | 0 | 4 | 1 |
| Case 92 | 13 | 114,263,595 | 114,740,938 | 3 | 0 | 3 | 1 |
| Case 92 | 13 | 114,746,660 | 114,901,188 | 4 | 0 | 4 | 1 |

|         |    |             |             |   |   |   |   |
|---------|----|-------------|-------------|---|---|---|---|
| Case 92 | 13 | 114,902,250 | 115,103,529 | 3 | 0 | 3 | 1 |
| Case 92 | 14 | 19,280,733  | 21,348,256  | 1 | 1 | 2 | 0 |
| Case 92 | 14 | 21,358,155  | 21,413,602  | 4 | 0 | 4 | 1 |
| Case 92 | 14 | 21,421,088  | 22,590,996  | 1 | 1 | 2 | 0 |
| Case 92 | 14 | 22,591,988  | 23,018,808  | 2 | 1 | 3 | 0 |
| Case 92 | 14 | 23,019,164  | 68,717,529  | 1 | 1 | 2 | 0 |
| Case 92 | 14 | 68,729,224  | 68,835,038  | 2 | 1 | 3 | 0 |
| Case 92 | 14 | 68,835,575  | 107,287,663 | 1 | 1 | 2 | 0 |
| Case 92 | 15 | 20,034,919  | 20,034,919  | 2 | 0 | 2 | 1 |
| Case 92 | 15 | 20,071,673  | 22,299,434  | 0 | 0 | 0 | 0 |
| Case 92 | 15 | 22,368,588  | 30,353,491  | 1 | 1 | 2 | 0 |
| Case 92 | 15 | 30,354,303  | 30,919,043  | 2 | 0 | 2 | 1 |
| Case 92 | 15 | 30,927,362  | 31,089,526  | 0 | 0 | 0 | 0 |
| Case 92 | 15 | 31,094,479  | 32,391,391  | 1 | 1 | 2 | 0 |
| Case 92 | 15 | 32,396,457  | 33,091,079  | 2 | 1 | 3 | 0 |
| Case 92 | 15 | 33,091,084  | 77,090,826  | 1 | 1 | 2 | 0 |
| Case 92 | 15 | 77,134,238  | 102,461,162 | 2 | 1 | 3 | 0 |
| Case 92 | 16 | 88,165      | 5,606,416   | 1 | 1 | 2 | 0 |
| Case 92 | 16 | 5,606,641   | 5,781,710   | 2 | 1 | 3 | 0 |
| Case 92 | 16 | 5,783,316   | 8,138,689   | 1 | 1 | 2 | 0 |
| Case 92 | 16 | 8,156,523   | 8,540,731   | 2 | 1 | 3 | 0 |
| Case 92 | 16 | 8,541,061   | 9,584,489   | 1 | 1 | 2 | 0 |
| Case 92 | 16 | 9,589,087   | 10,250,465  | 2 | 1 | 3 | 0 |
| Case 92 | 16 | 10,252,565  | 17,095,087  | 1 | 1 | 2 | 0 |
| Case 92 | 16 | 17,096,476  | 19,509,600  | 2 | 1 | 3 | 0 |
| Case 92 | 16 | 19,512,266  | 20,759,934  | 1 | 1 | 2 | 0 |
| Case 92 | 16 | 20,774,919  | 21,610,804  | 2 | 1 | 3 | 0 |
| Case 92 | 16 | 21,612,562  | 22,941,167  | 1 | 1 | 2 | 0 |
| Case 92 | 16 | 22,942,415  | 23,364,238  | 2 | 1 | 3 | 0 |
| Case 92 | 16 | 23,364,276  | 25,139,276  | 2 | 0 | 2 | 1 |
| Case 92 | 16 | 25,142,475  | 26,331,173  | 2 | 1 | 3 | 0 |
| Case 92 | 16 | 26,335,800  | 26,746,283  | 1 | 1 | 2 | 0 |
| Case 92 | 16 | 26,750,384  | 28,325,940  | 2 | 1 | 3 | 0 |
| Case 92 | 16 | 28,327,463  | 29,675,846  | 1 | 1 | 2 | 0 |
| Case 92 | 16 | 29,675,855  | 35,285,582  | 2 | 1 | 3 | 0 |
| Case 92 | 16 | 46,450,037  | 78,077,430  | 2 | 1 | 3 | 0 |
| Case 92 | 16 | 78,087,730  | 78,345,435  | 1 | 1 | 2 | 0 |
| Case 92 | 16 | 78,346,675  | 78,500,300  | 1 | 0 | 1 | 0 |
| Case 92 | 16 | 78,500,945  | 78,509,079  | 1 | 1 | 2 | 0 |
| Case 92 | 16 | 78,514,488  | 78,688,144  | 2 | 1 | 3 | 0 |
| Case 92 | 16 | 78,693,758  | 78,877,618  | 2 | 0 | 2 | 1 |
| Case 92 | 16 | 78,883,118  | 78,953,857  | 1 | 0 | 1 | 0 |
| Case 92 | 16 | 78,955,140  | 78,979,515  | 2 | 0 | 2 | 1 |
| Case 92 | 16 | 78,979,747  | 79,044,649  | 1 | 0 | 1 | 0 |
| Case 92 | 16 | 79,047,301  | 79,050,116  | 1 | 1 | 2 | 0 |
| Case 92 | 16 | 79,051,997  | 84,202,574  | 2 | 1 | 3 | 0 |
| Case 92 | 16 | 84,203,595  | 84,231,114  | 2 | 0 | 2 | 1 |
| Case 92 | 16 | 84,231,433  | 88,203,298  | 2 | 1 | 3 | 0 |
| Case 92 | 16 | 88,213,794  | 89,349,852  | 2 | 0 | 2 | 1 |
| Case 92 | 16 | 89,349,905  | 89,692,298  | 2 | 1 | 3 | 0 |
| Case 92 | 16 | 89,696,438  | 90,274,695  | 2 | 0 | 2 | 1 |
| Case 92 | 17 | 11,885      | 103,469     | 2 | 0 | 2 | 1 |
| Case 92 | 17 | 108,420     | 507,038     | 3 | 0 | 3 | 1 |
| Case 92 | 17 | 511,156     | 706,009     | 2 | 0 | 2 | 1 |
| Case 92 | 17 | 710,317     | 863,462     | 3 | 0 | 3 | 1 |
| Case 92 | 17 | 865,499     | 1,538,083   | 2 | 0 | 2 | 1 |
| Case 92 | 17 | 1,538,110   | 1,538,749   | 0 | 0 | 0 | 0 |
| Case 92 | 17 | 1,538,851   | 2,605,027   | 2 | 0 | 2 | 1 |
| Case 92 | 17 | 2,624,907   | 2,884,545   | 3 | 0 | 3 | 1 |
| Case 92 | 17 | 2,885,090   | 5,758,520   | 2 | 0 | 2 | 1 |
| Case 92 | 17 | 5,759,090   | 6,326,214   | 3 | 0 | 3 | 1 |

|         |    |            |            |   |   |   |   |
|---------|----|------------|------------|---|---|---|---|
| Case 92 | 17 | 6,327,389  | 15,039,528 | 2 | 0 | 2 | 1 |
| Case 92 | 17 | 15,044,804 | 15,058,236 | 0 | 0 | 0 | 0 |
| Case 92 | 17 | 15,058,991 | 17,326,605 | 2 | 0 | 2 | 1 |
| Case 92 | 17 | 17,329,728 | 18,181,588 | 1 | 0 | 1 | 0 |
| Case 92 | 17 | 18,181,592 | 19,670,262 | 2 | 0 | 2 | 1 |
| Case 92 | 17 | 19,676,691 | 20,023,099 | 1 | 0 | 1 | 0 |
| Case 92 | 17 | 20,026,548 | 22,242,355 | 2 | 0 | 2 | 1 |
| Case 92 | 17 | 25,268,142 | 26,100,144 | 2 | 0 | 2 | 1 |
| Case 92 | 17 | 26,100,206 | 27,031,419 | 3 | 0 | 3 | 1 |
| Case 92 | 17 | 27,035,335 | 27,076,072 | 2 | 0 | 2 | 1 |
| Case 92 | 17 | 27,076,453 | 33,489,889 | 3 | 0 | 3 | 1 |
| Case 92 | 17 | 33,490,991 | 36,182,400 | 2 | 0 | 2 | 1 |
| Case 92 | 17 | 36,185,038 | 41,132,622 | 3 | 0 | 3 | 1 |
| Case 92 | 17 | 41,132,795 | 41,371,844 | 2 | 0 | 2 | 1 |
| Case 92 | 17 | 41,375,555 | 41,868,311 | 3 | 0 | 3 | 1 |
| Case 92 | 17 | 41,877,128 | 42,831,754 | 2 | 0 | 2 | 1 |
| Case 92 | 17 | 42,835,129 | 45,633,376 | 3 | 0 | 3 | 1 |
| Case 92 | 17 | 45,671,506 | 45,925,890 | 2 | 0 | 2 | 1 |
| Case 92 | 17 | 45,933,165 | 51,167,870 | 3 | 0 | 3 | 1 |
| Case 92 | 17 | 51,186,416 | 54,572,012 | 2 | 0 | 2 | 1 |
| Case 92 | 17 | 54,572,895 | 54,794,707 | 2 | 1 | 3 | 0 |
| Case 92 | 17 | 54,795,340 | 57,255,828 | 2 | 0 | 2 | 1 |
| Case 92 | 17 | 57,258,670 | 57,599,128 | 2 | 1 | 3 | 0 |
| Case 92 | 17 | 57,629,247 | 58,128,004 | 2 | 0 | 2 | 1 |
| Case 92 | 17 | 58,134,504 | 58,529,401 | 2 | 1 | 3 | 0 |
| Case 92 | 17 | 58,531,811 | 59,022,395 | 2 | 0 | 2 | 1 |
| Case 92 | 17 | 59,034,422 | 59,282,508 | 2 | 1 | 3 | 0 |
| Case 92 | 17 | 59,286,644 | 59,630,944 | 2 | 0 | 2 | 1 |
| Case 92 | 17 | 59,632,873 | 60,405,483 | 3 | 0 | 3 | 1 |
| Case 92 | 17 | 60,408,874 | 60,631,102 | 2 | 1 | 3 | 0 |
| Case 92 | 17 | 60,651,381 | 63,162,476 | 2 | 0 | 2 | 1 |
| Case 92 | 17 | 63,164,319 | 63,476,044 | 3 | 0 | 3 | 1 |
| Case 92 | 17 | 63,495,631 | 63,856,717 | 2 | 0 | 2 | 1 |
| Case 92 | 17 | 63,859,521 | 64,809,835 | 3 | 0 | 3 | 1 |
| Case 92 | 17 | 64,812,198 | 66,284,635 | 2 | 0 | 2 | 1 |
| Case 92 | 17 | 66,289,041 | 66,714,228 | 3 | 0 | 3 | 1 |
| Case 92 | 17 | 66,714,282 | 68,207,627 | 2 | 0 | 2 | 1 |
| Case 92 | 17 | 68,212,550 | 68,344,483 | 2 | 1 | 3 | 0 |
| Case 92 | 17 | 68,358,343 | 69,181,096 | 2 | 0 | 2 | 1 |
| Case 92 | 17 | 69,183,954 | 70,317,988 | 3 | 0 | 3 | 1 |
| Case 92 | 17 | 70,319,162 | 70,517,559 | 2 | 0 | 2 | 1 |
| Case 92 | 17 | 70,522,932 | 70,918,607 | 3 | 0 | 3 | 1 |
| Case 92 | 17 | 70,919,212 | 71,113,564 | 2 | 1 | 3 | 0 |
| Case 92 | 17 | 71,115,694 | 72,155,302 | 2 | 2 | 4 | 0 |
| Case 92 | 17 | 72,161,815 | 72,470,671 | 2 | 0 | 2 | 1 |
| Case 92 | 17 | 72,470,704 | 72,588,352 | 3 | 0 | 3 | 1 |
| Case 92 | 17 | 72,588,388 | 73,144,665 | 2 | 1 | 3 | 0 |
| Case 92 | 17 | 73,148,553 | 73,547,742 | 2 | 0 | 2 | 1 |
| Case 92 | 17 | 73,548,863 | 73,569,309 | 1 | 0 | 1 | 0 |
| Case 92 | 17 | 73,569,338 | 73,941,955 | 2 | 0 | 2 | 1 |
| Case 92 | 17 | 73,942,150 | 74,158,801 | 2 | 1 | 3 | 0 |
| Case 92 | 17 | 74,162,548 | 74,581,880 | 2 | 0 | 2 | 1 |
| Case 92 | 17 | 74,593,903 | 74,696,760 | 3 | 0 | 3 | 1 |
| Case 92 | 17 | 74,697,528 | 76,490,718 | 2 | 0 | 2 | 1 |
| Case 92 | 17 | 76,491,052 | 76,578,308 | 3 | 0 | 3 | 1 |
| Case 92 | 17 | 76,578,523 | 76,792,179 | 2 | 0 | 2 | 1 |
| Case 92 | 17 | 76,792,833 | 76,885,117 | 2 | 1 | 3 | 0 |
| Case 92 | 17 | 76,890,177 | 77,223,799 | 2 | 0 | 2 | 1 |
| Case 92 | 17 | 77,226,086 | 77,447,393 | 3 | 0 | 3 | 1 |
| Case 92 | 17 | 77,449,125 | 80,901,020 | 2 | 0 | 2 | 1 |
| Case 92 | 17 | 80,902,411 | 81,060,040 | 3 | 0 | 3 | 1 |

|         |    |            |            |   |   |   |   |
|---------|----|------------|------------|---|---|---|---|
| Case 92 | 18 | 87,505     | 9,051,342  | 3 | 0 | 3 | 1 |
| Case 92 | 18 | 9,053,241  | 9,951,304  | 4 | 0 | 4 | 1 |
| Case 92 | 18 | 9,951,994  | 15,375,878 | 3 | 0 | 3 | 1 |
| Case 92 | 18 | 18,520,354 | 18,520,354 | 3 | 0 | 3 | 1 |
| Case 92 | 18 | 18,539,806 | 18,561,020 | 2 | 2 | 4 | 0 |
| Case 92 | 18 | 18,564,483 | 20,082,830 | 3 | 2 | 5 | 0 |
| Case 92 | 18 | 20,097,612 | 20,563,222 | 4 | 0 | 4 | 1 |
| Case 92 | 18 | 20,564,275 | 20,573,295 | 3 | 0 | 3 | 1 |
| Case 92 | 18 | 20,573,556 | 32,405,595 | 2 | 0 | 2 | 1 |
| Case 92 | 18 | 32,407,987 | 46,623,873 | 1 | 0 | 1 | 0 |
| Case 92 | 18 | 46,626,341 | 62,494,385 | 2 | 0 | 2 | 1 |
| Case 92 | 18 | 62,497,622 | 63,946,605 | 1 | 0 | 1 | 0 |
| Case 92 | 18 | 63,947,957 | 65,318,652 | 2 | 0 | 2 | 1 |
| Case 92 | 18 | 65,318,794 | 65,766,146 | 1 | 0 | 1 | 0 |
| Case 92 | 18 | 65,770,683 | 66,744,288 | 2 | 0 | 2 | 1 |
| Case 92 | 18 | 66,744,308 | 66,758,232 | 0 | 0 | 0 | 0 |
| Case 92 | 18 | 66,758,828 | 69,189,830 | 2 | 0 | 2 | 1 |
| Case 92 | 18 | 69,192,020 | 69,392,860 | 1 | 0 | 1 | 0 |
| Case 92 | 18 | 69,394,952 | 78,015,180 | 2 | 0 | 2 | 1 |
| Case 92 | 19 | 260,912    | 1,047,336  | 1 | 1 | 2 | 0 |
| Case 92 | 19 | 1,047,524  | 1,056,431  | 1 | 0 | 1 | 0 |
| Case 92 | 19 | 1,056,563  | 11,870,583 | 1 | 1 | 2 | 0 |
| Case 92 | 19 | 11,873,382 | 12,586,385 | 1 | 0 | 1 | 0 |
| Case 92 | 19 | 12,589,174 | 20,170,214 | 1 | 1 | 2 | 0 |
| Case 92 | 19 | 20,190,141 | 22,364,355 | 1 | 0 | 1 | 0 |
| Case 92 | 19 | 22,364,389 | 23,279,003 | 1 | 1 | 2 | 0 |
| Case 92 | 19 | 23,287,861 | 24,629,285 | 1 | 0 | 1 | 0 |
| Case 92 | 19 | 27,732,159 | 28,319,922 | 1 | 0 | 1 | 0 |
| Case 92 | 19 | 28,327,584 | 43,237,073 | 1 | 1 | 2 | 0 |
| Case 92 | 19 | 43,237,080 | 43,406,595 | 4 | 0 | 4 | 1 |
| Case 92 | 19 | 43,411,914 | 49,129,553 | 1 | 1 | 2 | 0 |
| Case 92 | 19 | 49,129,618 | 49,183,284 | 2 | 0 | 2 | 1 |
| Case 92 | 19 | 49,184,380 | 49,206,462 | 0 | 0 | 0 | 0 |
| Case 92 | 19 | 49,206,631 | 59,097,160 | 1 | 1 | 2 | 0 |
| Case 92 | 20 | 63,244     | 809,837    | 1 | 1 | 2 | 0 |
| Case 92 | 20 | 810,707    | 999,784    | 4 | 0 | 4 | 1 |
| Case 92 | 20 | 1,002,656  | 3,684,496  | 3 | 0 | 3 | 1 |
| Case 92 | 20 | 3,684,517  | 5,685,929  | 1 | 1 | 2 | 0 |
| Case 92 | 20 | 5,690,278  | 6,183,117  | 3 | 0 | 3 | 1 |
| Case 92 | 20 | 6,186,488  | 7,819,768  | 4 | 0 | 4 | 1 |
| Case 92 | 20 | 7,828,432  | 7,838,533  | 2 | 1 | 3 | 0 |
| Case 92 | 20 | 7,847,156  | 7,990,898  | 3 | 1 | 4 | 0 |
| Case 92 | 20 | 7,998,156  | 8,130,943  | 1 | 1 | 2 | 0 |
| Case 92 | 20 | 8,135,557  | 8,247,326  | 3 | 0 | 3 | 1 |
| Case 92 | 20 | 8,253,285  | 14,420,556 | 1 | 1 | 2 | 0 |
| Case 92 | 20 | 14,425,337 | 15,110,701 | 3 | 0 | 3 | 1 |
| Case 92 | 20 | 15,111,138 | 15,120,744 | 2 | 1 | 3 | 0 |
| Case 92 | 20 | 15,122,254 | 16,263,388 | 3 | 1 | 4 | 0 |
| Case 92 | 20 | 16,263,808 | 24,247,556 | 2 | 1 | 3 | 0 |
| Case 92 | 20 | 24,248,344 | 25,412,135 | 2 | 2 | 4 | 0 |
| Case 92 | 20 | 25,428,261 | 26,293,985 | 2 | 1 | 3 | 0 |
| Case 92 | 20 | 29,425,357 | 32,238,893 | 2 | 1 | 3 | 0 |
| Case 92 | 20 | 32,241,851 | 32,379,300 | 1 | 1 | 2 | 0 |
| Case 92 | 20 | 32,379,318 | 60,890,155 | 2 | 1 | 3 | 0 |
| Case 92 | 20 | 60,890,243 | 60,909,518 | 1 | 1 | 2 | 0 |
| Case 92 | 20 | 60,910,124 | 62,187,126 | 2 | 1 | 3 | 0 |
| Case 92 | 20 | 62,187,204 | 62,203,708 | 1 | 1 | 2 | 0 |
| Case 92 | 20 | 62,207,862 | 62,948,788 | 2 | 1 | 3 | 0 |
| Case 92 | 21 | 10,827,533 | 10,971,337 | 2 | 0 | 2 | 1 |
| Case 92 | 21 | 14,368,320 | 15,647,431 | 2 | 0 | 2 | 1 |
| Case 92 | 21 | 15,648,154 | 15,735,675 | 3 | 0 | 3 | 1 |

|         |    |            |            |   |   |   |   |
|---------|----|------------|------------|---|---|---|---|
| Case 92 | 21 | 15,737,925 | 17,654,621 | 2 | 0 | 2 | 1 |
| Case 92 | 21 | 17,657,785 | 17,701,594 | 3 | 0 | 3 | 1 |
| Case 92 | 21 | 17,702,346 | 18,791,719 | 2 | 0 | 2 | 1 |
| Case 92 | 21 | 18,791,934 | 18,885,898 | 3 | 0 | 3 | 1 |
| Case 92 | 21 | 18,890,217 | 21,512,641 | 2 | 0 | 2 | 1 |
| Case 92 | 21 | 21,514,753 | 22,881,335 | 3 | 0 | 3 | 1 |
| Case 92 | 21 | 22,881,350 | 23,037,355 | 2 | 0 | 2 | 1 |
| Case 92 | 21 | 23,042,642 | 23,359,814 | 3 | 0 | 3 | 1 |
| Case 92 | 21 | 23,366,550 | 23,827,224 | 2 | 0 | 2 | 1 |
| Case 92 | 21 | 23,827,411 | 25,491,856 | 3 | 0 | 3 | 1 |
| Case 92 | 21 | 25,495,914 | 25,779,132 | 2 | 0 | 2 | 1 |
| Case 92 | 21 | 25,780,751 | 29,120,337 | 3 | 0 | 3 | 1 |
| Case 92 | 21 | 29,122,939 | 29,853,103 | 2 | 0 | 2 | 1 |
| Case 92 | 21 | 29,853,569 | 32,759,208 | 3 | 0 | 3 | 1 |
| Case 92 | 21 | 32,760,247 | 33,088,241 | 2 | 0 | 2 | 1 |
| Case 92 | 21 | 33,096,867 | 33,565,065 | 3 | 0 | 3 | 1 |
| Case 92 | 21 | 33,572,259 | 34,308,197 | 2 | 0 | 2 | 1 |
| Case 92 | 21 | 34,309,113 | 34,882,188 | 3 | 0 | 3 | 1 |
| Case 92 | 21 | 34,882,197 | 35,210,184 | 2 | 0 | 2 | 1 |
| Case 92 | 21 | 35,210,252 | 37,653,782 | 3 | 0 | 3 | 1 |
| Case 92 | 21 | 37,660,314 | 37,837,930 | 2 | 0 | 2 | 1 |
| Case 92 | 21 | 37,839,410 | 38,350,382 | 3 | 0 | 3 | 1 |
| Case 92 | 21 | 38,351,913 | 38,444,881 | 2 | 0 | 2 | 1 |
| Case 92 | 21 | 38,455,324 | 38,998,126 | 1 | 0 | 1 | 0 |
| Case 92 | 21 | 38,999,590 | 44,253,679 | 2 | 0 | 2 | 1 |
| Case 92 | 21 | 44,256,314 | 44,496,941 | 1 | 0 | 1 | 0 |
| Case 92 | 21 | 44,503,243 | 44,833,854 | 2 | 0 | 2 | 1 |
| Case 92 | 21 | 44,835,301 | 44,840,296 | 0 | 0 | 0 | 0 |
| Case 92 | 21 | 44,845,968 | 45,704,644 | 2 | 0 | 2 | 1 |
| Case 92 | 21 | 45,706,476 | 45,859,013 | 1 | 0 | 1 | 0 |
| Case 92 | 21 | 45,859,014 | 46,926,054 | 2 | 0 | 2 | 1 |
| Case 92 | 21 | 46,926,551 | 47,427,839 | 1 | 0 | 1 | 0 |
| Case 92 | 21 | 47,431,031 | 47,491,975 | 2 | 0 | 2 | 1 |
| Case 92 | 21 | 47,494,789 | 47,768,933 | 1 | 0 | 1 | 0 |
| Case 92 | 21 | 47,769,074 | 47,809,254 | 2 | 0 | 2 | 1 |
| Case 92 | 21 | 47,810,597 | 47,864,633 | 1 | 0 | 1 | 0 |
| Case 92 | 21 | 47,867,318 | 48,100,155 | 2 | 0 | 2 | 1 |
| Case 92 | 22 | 16,114,244 | 25,650,406 | 1 | 1 | 2 | 0 |
| Case 92 | 22 | 25,650,460 | 25,914,593 | 4 | 0 | 4 | 1 |
| Case 92 | 22 | 25,924,444 | 32,554,860 | 1 | 1 | 2 | 0 |
| Case 92 | 22 | 32,554,985 | 37,263,846 | 4 | 0 | 4 | 1 |
| Case 92 | 22 | 37,266,572 | 37,782,938 | 3 | 0 | 3 | 1 |
| Case 92 | 22 | 37,783,351 | 38,119,378 | 4 | 0 | 4 | 1 |
| Case 92 | 22 | 38,119,380 | 38,398,267 | 3 | 0 | 3 | 1 |
| Case 92 | 22 | 38,415,721 | 40,452,119 | 7 | 0 | 7 | 1 |
| Case 92 | 22 | 40,454,069 | 47,309,351 | 1 | 1 | 2 | 0 |
| Case 92 | 22 | 47,310,557 | 47,310,557 | 2 | 0 | 2 | 1 |
| Case 92 | 22 | 47,313,082 | 47,313,082 | 1 | 1 | 2 | 0 |
| Case 92 | 22 | 47,319,208 | 47,355,583 | 0 | 0 | 0 | 0 |
| Case 92 | 22 | 47,358,367 | 51,195,728 | 1 | 1 | 2 | 0 |
| Case 93 | 1  | 82,154     | 909,276    | 4 | 0 | 4 | 1 |
| Case 93 | 1  | 909,309    | 1,334,519  | 3 | 1 | 4 | 0 |
| Case 93 | 1  | 1,335,218  | 1,664,124  | 3 | 0 | 3 | 1 |
| Case 93 | 1  | 1,680,219  | 2,222,583  | 4 | 0 | 4 | 1 |
| Case 93 | 1  | 2,223,866  | 2,523,053  | 3 | 0 | 3 | 1 |
| Case 93 | 1  | 2,523,412  | 3,425,797  | 3 | 1 | 4 | 0 |
| Case 93 | 1  | 3,426,533  | 3,548,122  | 3 | 0 | 3 | 1 |
| Case 93 | 1  | 3,548,198  | 6,418,218  | 4 | 0 | 4 | 1 |
| Case 93 | 1  | 6,420,661  | 6,657,240  | 3 | 0 | 3 | 1 |
| Case 93 | 1  | 6,659,186  | 10,638,604 | 4 | 0 | 4 | 1 |
| Case 93 | 1  | 10,642,506 | 10,790,797 | 3 | 0 | 3 | 1 |

|         |   |             |             |   |   |   |   |
|---------|---|-------------|-------------|---|---|---|---|
| Case 93 | 1 | 10,796,866  | 15,808,872  | 4 | 0 | 4 | 1 |
| Case 93 | 1 | 15,810,624  | 16,124,438  | 3 | 0 | 3 | 1 |
| Case 93 | 1 | 16,126,207  | 16,461,546  | 4 | 0 | 4 | 1 |
| Case 93 | 1 | 16,461,581  | 17,004,850  | 3 | 0 | 3 | 1 |
| Case 93 | 1 | 17,228,131  | 17,885,856  | 4 | 0 | 4 | 1 |
| Case 93 | 1 | 17,887,963  | 17,939,626  | 3 | 1 | 4 | 0 |
| Case 93 | 1 | 17,942,591  | 18,633,683  | 3 | 2 | 5 | 0 |
| Case 93 | 1 | 18,643,247  | 18,643,577  | 4 | 1 | 5 | 0 |
| Case 93 | 1 | 18,643,632  | 19,243,446  | 4 | 0 | 4 | 1 |
| Case 93 | 1 | 19,243,589  | 20,304,785  | 3 | 1 | 4 | 0 |
| Case 93 | 1 | 20,304,857  | 20,427,541  | 3 | 0 | 3 | 1 |
| Case 93 | 1 | 20,429,861  | 20,957,431  | 4 | 0 | 4 | 1 |
| Case 93 | 1 | 20,959,421  | 21,036,291  | 3 | 0 | 3 | 1 |
| Case 93 | 1 | 21,040,151  | 21,629,447  | 4 | 0 | 4 | 1 |
| Case 93 | 1 | 21,631,472  | 26,373,274  | 3 | 0 | 3 | 1 |
| Case 93 | 1 | 26,376,607  | 26,584,731  | 2 | 2 | 4 | 0 |
| Case 93 | 1 | 26,586,135  | 27,374,218  | 3 | 0 | 3 | 1 |
| Case 93 | 1 | 27,375,717  | 28,661,302  | 2 | 2 | 4 | 0 |
| Case 93 | 1 | 28,661,383  | 31,961,711  | 3 | 0 | 3 | 1 |
| Case 93 | 1 | 31,972,756  | 32,745,458  | 2 | 2 | 4 | 0 |
| Case 93 | 1 | 32,752,074  | 35,384,605  | 3 | 0 | 3 | 1 |
| Case 93 | 1 | 35,403,677  | 36,550,658  | 2 | 0 | 2 | 1 |
| Case 93 | 1 | 36,550,788  | 39,856,056  | 3 | 0 | 3 | 1 |
| Case 93 | 1 | 39,867,508  | 40,051,616  | 2 | 0 | 2 | 1 |
| Case 93 | 1 | 40,073,479  | 45,610,193  | 3 | 0 | 3 | 1 |
| Case 93 | 1 | 45,612,038  | 45,806,750  | 2 | 0 | 2 | 1 |
| Case 93 | 1 | 45,806,765  | 55,243,590  | 3 | 0 | 3 | 1 |
| Case 93 | 1 | 55,248,059  | 55,248,120  | 0 | 0 | 0 | 0 |
| Case 93 | 1 | 55,249,154  | 55,521,713  | 3 | 0 | 3 | 1 |
| Case 93 | 1 | 55,523,076  | 55,525,315  | 1 | 0 | 1 | 0 |
| Case 93 | 1 | 55,526,428  | 62,898,142  | 3 | 0 | 3 | 1 |
| Case 93 | 1 | 62,905,542  | 63,307,174  | 2 | 0 | 2 | 1 |
| Case 93 | 1 | 63,311,836  | 67,236,097  | 3 | 0 | 3 | 1 |
| Case 93 | 1 | 67,236,126  | 67,486,131  | 2 | 0 | 2 | 1 |
| Case 93 | 1 | 67,494,591  | 68,933,774  | 3 | 0 | 3 | 1 |
| Case 93 | 1 | 68,936,124  | 70,816,563  | 2 | 0 | 2 | 1 |
| Case 93 | 1 | 70,818,576  | 74,298,254  | 3 | 0 | 3 | 1 |
| Case 93 | 1 | 74,299,658  | 74,674,290  | 2 | 0 | 2 | 1 |
| Case 93 | 1 | 74,675,208  | 76,199,277  | 3 | 0 | 3 | 1 |
| Case 93 | 1 | 76,205,722  | 76,411,549  | 2 | 0 | 2 | 1 |
| Case 93 | 1 | 76,420,745  | 84,165,934  | 3 | 0 | 3 | 1 |
| Case 93 | 1 | 84,168,682  | 87,584,639  | 2 | 2 | 4 | 0 |
| Case 93 | 1 | 87,587,849  | 90,248,302  | 3 | 0 | 3 | 1 |
| Case 93 | 1 | 90,249,829  | 91,339,437  | 2 | 2 | 4 | 0 |
| Case 93 | 1 | 91,352,818  | 92,297,887  | 3 | 0 | 3 | 1 |
| Case 93 | 1 | 92,302,369  | 94,088,650  | 2 | 2 | 4 | 0 |
| Case 93 | 1 | 94,097,441  | 98,079,228  | 3 | 0 | 3 | 1 |
| Case 93 | 1 | 98,079,674  | 98,265,667  | 2 | 0 | 2 | 1 |
| Case 93 | 1 | 98,265,843  | 102,647,938 | 3 | 0 | 3 | 1 |
| Case 93 | 1 | 102,649,588 | 104,716,956 | 2 | 0 | 2 | 1 |
| Case 93 | 1 | 104,725,387 | 106,849,846 | 2 | 2 | 4 | 0 |
| Case 93 | 1 | 106,860,057 | 107,923,094 | 2 | 0 | 2 | 1 |
| Case 93 | 1 | 107,925,625 | 109,366,554 | 3 | 0 | 3 | 1 |
| Case 93 | 1 | 109,367,944 | 109,371,874 | 0 | 0 | 0 | 0 |
| Case 93 | 1 | 109,373,214 | 111,187,885 | 3 | 0 | 3 | 1 |
| Case 93 | 1 | 111,189,722 | 111,671,707 | 2 | 0 | 2 | 1 |
| Case 93 | 1 | 111,682,118 | 114,367,763 | 3 | 0 | 3 | 1 |
| Case 93 | 1 | 114,367,793 | 117,049,676 | 2 | 2 | 4 | 0 |
| Case 93 | 1 | 117,053,745 | 118,199,767 | 3 | 0 | 3 | 1 |
| Case 93 | 1 | 118,208,245 | 121,346,616 | 2 | 2 | 4 | 0 |
| Case 93 | 1 | 142,649,718 | 154,934,963 | 2 | 2 | 4 | 0 |

|         |   |             |             |   |   |   |   |
|---------|---|-------------|-------------|---|---|---|---|
| Case 93 | 1 | 154,936,312 | 155,226,107 | 3 | 0 | 3 | 1 |
| Case 93 | 1 | 155,226,571 | 155,932,841 | 2 | 2 | 4 | 0 |
| Case 93 | 1 | 155,932,914 | 156,641,908 | 3 | 2 | 5 | 0 |
| Case 93 | 1 | 156,642,155 | 156,689,481 | 4 | 1 | 5 | 0 |
| Case 93 | 1 | 156,690,967 | 156,690,967 | 3 | 0 | 3 | 1 |
| Case 93 | 1 | 156,693,135 | 174,113,342 | 2 | 2 | 4 | 0 |
| Case 93 | 1 | 174,126,742 | 174,265,291 | 3 | 0 | 3 | 1 |
| Case 93 | 1 | 174,266,642 | 174,469,905 | 2 | 2 | 4 | 0 |
| Case 93 | 1 | 174,479,498 | 174,497,642 | 2 | 0 | 2 | 1 |
| Case 93 | 1 | 174,499,977 | 237,859,614 | 2 | 2 | 4 | 0 |
| Case 93 | 1 | 237,862,587 | 245,766,015 | 2 | 1 | 3 | 0 |
| Case 93 | 1 | 245,766,651 | 245,953,416 | 3 | 0 | 3 | 1 |
| Case 93 | 1 | 245,957,828 | 249,218,992 | 2 | 1 | 3 | 0 |
| Case 93 | 2 | 18,674      | 25,663,991  | 2 | 1 | 3 | 0 |
| Case 93 | 2 | 25,668,692  | 26,113,120  | 2 | 0 | 2 | 1 |
| Case 93 | 2 | 26,117,455  | 57,884,675  | 2 | 1 | 3 | 0 |
| Case 93 | 2 | 57,884,793  | 60,698,397  | 2 | 2 | 4 | 0 |
| Case 93 | 2 | 60,702,766  | 83,273,436  | 2 | 1 | 3 | 0 |
| Case 93 | 2 | 83,276,705  | 92,081,640  | 2 | 2 | 4 | 0 |
| Case 93 | 2 | 95,429,424  | 133,906,887 | 2 | 2 | 4 | 0 |
| Case 93 | 2 | 133,919,427 | 135,218,605 | 2 | 0 | 2 | 1 |
| Case 93 | 2 | 135,219,050 | 135,677,035 | 3 | 0 | 3 | 1 |
| Case 93 | 2 | 135,677,161 | 149,916,356 | 2 | 0 | 2 | 1 |
| Case 93 | 2 | 149,919,348 | 154,690,220 | 2 | 2 | 4 | 0 |
| Case 93 | 2 | 154,691,177 | 154,900,325 | 2 | 1 | 3 | 0 |
| Case 93 | 2 | 154,901,891 | 243,048,760 | 2 | 2 | 4 | 0 |
| Case 93 | 3 | 61,495      | 2,832,318   | 1 | 1 | 2 | 0 |
| Case 93 | 3 | 2,835,642   | 3,558,481   | 2 | 1 | 3 | 0 |
| Case 93 | 3 | 3,558,555   | 4,313,485   | 1 | 1 | 2 | 0 |
| Case 93 | 3 | 4,317,445   | 4,430,848   | 1 | 0 | 1 | 0 |
| Case 93 | 3 | 4,431,225   | 4,804,081   | 1 | 1 | 2 | 0 |
| Case 93 | 3 | 4,805,489   | 5,147,044   | 2 | 1 | 3 | 0 |
| Case 93 | 3 | 5,163,840   | 8,563,144   | 1 | 1 | 2 | 0 |
| Case 93 | 3 | 8,568,468   | 8,631,614   | 2 | 1 | 3 | 0 |
| Case 93 | 3 | 8,632,542   | 8,944,099   | 1 | 1 | 2 | 0 |
| Case 93 | 3 | 8,944,139   | 9,969,994   | 2 | 1 | 3 | 0 |
| Case 93 | 3 | 9,970,030   | 10,084,831  | 1 | 1 | 2 | 0 |
| Case 93 | 3 | 10,085,035  | 10,268,064  | 2 | 1 | 3 | 0 |
| Case 93 | 3 | 10,272,775  | 10,416,225  | 1 | 1 | 2 | 0 |
| Case 93 | 3 | 10,416,287  | 13,368,741  | 2 | 1 | 3 | 0 |
| Case 93 | 3 | 13,368,824  | 13,642,946  | 1 | 1 | 2 | 0 |
| Case 93 | 3 | 13,644,176  | 14,614,380  | 2 | 1 | 3 | 0 |
| Case 93 | 3 | 14,621,295  | 14,860,955  | 1 | 1 | 2 | 0 |
| Case 93 | 3 | 14,861,289  | 15,100,801  | 2 | 1 | 3 | 0 |
| Case 93 | 3 | 15,102,111  | 15,478,028  | 1 | 1 | 2 | 0 |
| Case 93 | 3 | 15,478,047  | 16,019,023  | 2 | 1 | 3 | 0 |
| Case 93 | 3 | 16,036,830  | 30,893,309  | 1 | 1 | 2 | 0 |
| Case 93 | 3 | 30,894,470  | 31,445,580  | 2 | 1 | 3 | 0 |
| Case 93 | 3 | 31,445,799  | 31,656,614  | 1 | 1 | 2 | 0 |
| Case 93 | 3 | 31,659,458  | 31,950,590  | 2 | 1 | 3 | 0 |
| Case 93 | 3 | 31,951,420  | 33,057,497  | 1 | 1 | 2 | 0 |
| Case 93 | 3 | 33,059,977  | 33,257,434  | 2 | 1 | 3 | 0 |
| Case 93 | 3 | 33,258,380  | 33,983,197  | 1 | 1 | 2 | 0 |
| Case 93 | 3 | 33,985,368  | 34,222,230  | 2 | 1 | 3 | 0 |
| Case 93 | 3 | 34,241,686  | 34,451,940  | 1 | 1 | 2 | 0 |
| Case 93 | 3 | 34,465,049  | 34,569,954  | 5 | 1 | 6 | 0 |
| Case 93 | 3 | 34,580,559  | 34,592,382  | 2 | 1 | 3 | 0 |
| Case 93 | 3 | 34,593,180  | 35,987,406  | 1 | 1 | 2 | 0 |
| Case 93 | 3 | 35,987,444  | 36,143,350  | 1 | 0 | 1 | 0 |
| Case 93 | 3 | 36,148,330  | 36,148,330  | 3 | 0 | 3 | 1 |
| Case 93 | 3 | 36,148,866  | 39,230,912  | 2 | 0 | 2 | 1 |

|         |   |             |             |   |   |   |   |
|---------|---|-------------|-------------|---|---|---|---|
| Case 93 | 3 | 39,230,997  | 39,791,421  | 2 | 1 | 3 | 0 |
| Case 93 | 3 | 39,794,278  | 40,105,341  | 1 | 1 | 2 | 0 |
| Case 93 | 3 | 40,107,494  | 40,459,532  | 2 | 1 | 3 | 0 |
| Case 93 | 3 | 40,459,724  | 41,973,462  | 1 | 1 | 2 | 0 |
| Case 93 | 3 | 41,985,152  | 42,471,406  | 2 | 1 | 3 | 0 |
| Case 93 | 3 | 42,484,782  | 42,701,278  | 1 | 1 | 2 | 0 |
| Case 93 | 3 | 42,703,029  | 43,262,649  | 2 | 1 | 3 | 0 |
| Case 93 | 3 | 43,266,311  | 44,461,080  | 1 | 1 | 2 | 0 |
| Case 93 | 3 | 44,461,904  | 44,761,729  | 2 | 1 | 3 | 0 |
| Case 93 | 3 | 44,762,392  | 44,810,107  | 1 | 1 | 2 | 0 |
| Case 93 | 3 | 44,814,073  | 45,999,920  | 2 | 1 | 3 | 0 |
| Case 93 | 3 | 46,000,931  | 46,014,667  | 1 | 1 | 2 | 0 |
| Case 93 | 3 | 46,016,944  | 46,952,777  | 2 | 1 | 3 | 0 |
| Case 93 | 3 | 46,961,910  | 47,455,086  | 1 | 1 | 2 | 0 |
| Case 93 | 3 | 47,455,730  | 53,899,199  | 2 | 1 | 3 | 0 |
| Case 93 | 3 | 53,899,276  | 56,104,964  | 1 | 1 | 2 | 0 |
| Case 93 | 3 | 56,105,349  | 57,011,234  | 2 | 1 | 3 | 0 |
| Case 93 | 3 | 57,014,104  | 58,470,351  | 2 | 0 | 2 | 1 |
| Case 93 | 3 | 58,474,014  | 59,470,670  | 2 | 1 | 3 | 0 |
| Case 93 | 3 | 59,472,956  | 60,237,710  | 1 | 1 | 2 | 0 |
| Case 93 | 3 | 60,238,326  | 60,853,686  | 1 | 0 | 1 | 0 |
| Case 93 | 3 | 60,857,053  | 61,942,816  | 1 | 1 | 2 | 0 |
| Case 93 | 3 | 61,950,168  | 62,728,523  | 2 | 1 | 3 | 0 |
| Case 93 | 3 | 62,729,720  | 63,628,019  | 1 | 1 | 2 | 0 |
| Case 93 | 3 | 63,637,090  | 65,077,476  | 2 | 1 | 3 | 0 |
| Case 93 | 3 | 65,077,900  | 65,780,869  | 1 | 1 | 2 | 0 |
| Case 93 | 3 | 65,787,275  | 66,692,943  | 2 | 1 | 3 | 0 |
| Case 93 | 3 | 66,697,961  | 68,764,017  | 1 | 1 | 2 | 0 |
| Case 93 | 3 | 68,766,552  | 69,151,024  | 1 | 0 | 1 | 0 |
| Case 93 | 3 | 69,151,049  | 69,153,481  | 3 | 0 | 3 | 1 |
| Case 93 | 3 | 69,153,645  | 70,905,581  | 2 | 0 | 2 | 1 |
| Case 93 | 3 | 70,907,252  | 73,844,739  | 2 | 1 | 3 | 0 |
| Case 93 | 3 | 73,845,507  | 80,665,977  | 1 | 1 | 2 | 0 |
| Case 93 | 3 | 80,669,984  | 90,442,925  | 2 | 1 | 3 | 0 |
| Case 93 | 3 | 93,537,290  | 118,253,469 | 2 | 1 | 3 | 0 |
| Case 93 | 3 | 118,257,029 | 118,891,246 | 4 | 1 | 5 | 0 |
| Case 93 | 3 | 118,901,013 | 126,137,547 | 2 | 1 | 3 | 0 |
| Case 93 | 3 | 126,137,556 | 126,272,160 | 4 | 1 | 5 | 0 |
| Case 93 | 3 | 126,272,252 | 127,323,612 | 5 | 1 | 6 | 0 |
| Case 93 | 3 | 127,323,617 | 134,571,470 | 4 | 1 | 5 | 0 |
| Case 93 | 3 | 134,571,577 | 142,796,422 | 7 | 0 | 7 | 1 |
| Case 93 | 3 | 142,800,051 | 142,829,423 | 2 | 1 | 3 | 0 |
| Case 93 | 3 | 142,834,022 | 146,634,035 | 4 | 1 | 5 | 0 |
| Case 93 | 3 | 146,637,290 | 152,679,420 | 7 | 0 | 7 | 1 |
| Case 93 | 3 | 152,687,097 | 155,811,323 | 1 | 1 | 2 | 0 |
| Case 93 | 3 | 155,822,097 | 156,185,892 | 2 | 1 | 3 | 0 |
| Case 93 | 3 | 156,204,177 | 168,621,773 | 1 | 1 | 2 | 0 |
| Case 93 | 3 | 168,626,039 | 168,802,737 | 2 | 1 | 3 | 0 |
| Case 93 | 3 | 168,806,925 | 168,811,043 | 1 | 1 | 2 | 0 |
| Case 93 | 3 | 168,812,865 | 168,962,600 | 5 | 2 | 7 | 0 |
| Case 93 | 3 | 168,963,285 | 169,727,061 | 2 | 1 | 3 | 0 |
| Case 93 | 3 | 169,731,027 | 169,947,906 | 1 | 1 | 2 | 0 |
| Case 93 | 3 | 169,958,552 | 170,079,132 | 7 | 0 | 7 | 1 |
| Case 93 | 3 | 170,091,902 | 182,755,101 | 2 | 1 | 3 | 0 |
| Case 93 | 3 | 182,755,108 | 182,755,209 | 3 | 0 | 3 | 1 |
| Case 93 | 3 | 182,756,854 | 184,062,546 | 3 | 1 | 4 | 0 |
| Case 93 | 3 | 184,062,580 | 184,071,977 | 3 | 0 | 3 | 1 |
| Case 93 | 3 | 184,073,170 | 184,714,255 | 2 | 1 | 3 | 0 |
| Case 93 | 3 | 184,717,530 | 185,191,371 | 2 | 2 | 4 | 0 |
| Case 93 | 3 | 185,198,112 | 187,624,906 | 2 | 1 | 3 | 0 |
| Case 93 | 3 | 187,629,503 | 188,155,409 | 2 | 0 | 2 | 1 |



|         |   |             |             |   |   |   |   |
|---------|---|-------------|-------------|---|---|---|---|
| Case 93 | 3 | 188,158,045 | 196,088,464 | 2 | 1 | 3 | 0 |
| Case 93 | 3 | 196,096,451 | 196,278,366 | 4 | 0 | 4 | 1 |
| Case 93 | 3 | 196,280,669 | 197,838,262 | 3 | 1 | 4 | 0 |
| Case 93 | 4 | 71,566      | 493,148     | 1 | 0 | 1 | 0 |
| Case 93 | 4 | 493,156     | 517,461     | 3 | 0 | 3 | 1 |
| Case 93 | 4 | 517,495     | 6,018,891   | 2 | 0 | 2 | 1 |
| Case 93 | 4 | 6,020,190   | 6,303,197   | 3 | 0 | 3 | 1 |
| Case 93 | 4 | 6,303,247   | 7,437,059   | 2 | 0 | 2 | 1 |
| Case 93 | 4 | 7,437,364   | 7,840,696   | 3 | 0 | 3 | 1 |
| Case 93 | 4 | 7,841,487   | 15,713,513  | 2 | 0 | 2 | 1 |
| Case 93 | 4 | 15,716,923  | 41,664,970  | 2 | 2 | 4 | 0 |
| Case 93 | 4 | 41,666,173  | 49,620,898  | 2 | 1 | 3 | 0 |
| Case 93 | 4 | 52,697,856  | 89,756,076  | 2 | 1 | 3 | 0 |
| Case 93 | 4 | 89,761,563  | 89,940,992  | 4 | 0 | 4 | 1 |
| Case 93 | 4 | 89,941,734  | 91,711,665  | 3 | 1 | 4 | 0 |
| Case 93 | 4 | 91,715,008  | 92,452,205  | 3 | 0 | 3 | 1 |
| Case 93 | 4 | 92,454,931  | 136,131,907 | 3 | 1 | 4 | 0 |
| Case 93 | 4 | 136,147,584 | 137,178,274 | 5 | 0 | 5 | 1 |
| Case 93 | 4 | 137,181,847 | 137,181,847 | 5 | 1 | 6 | 0 |
| Case 93 | 4 | 137,196,244 | 137,196,244 | 7 | 0 | 7 | 1 |
| Case 93 | 4 | 137,206,602 | 137,259,828 | 1 | 1 | 2 | 0 |
| Case 93 | 4 | 137,299,152 | 148,944,435 | 5 | 1 | 6 | 0 |
| Case 93 | 4 | 148,944,438 | 148,944,438 | 2 | 1 | 3 | 0 |
| Case 93 | 4 | 148,944,496 | 159,185,770 | 4 | 1 | 5 | 0 |
| Case 93 | 4 | 159,190,290 | 162,612,565 | 3 | 1 | 4 | 0 |
| Case 93 | 4 | 162,633,257 | 164,777,197 | 3 | 0 | 3 | 1 |
| Case 93 | 4 | 164,779,320 | 165,700,679 | 4 | 0 | 4 | 1 |
| Case 93 | 4 | 165,707,728 | 167,232,997 | 3 | 0 | 3 | 1 |
| Case 93 | 4 | 167,237,947 | 169,407,947 | 2 | 0 | 2 | 1 |
| Case 93 | 4 | 169,408,390 | 169,788,148 | 3 | 0 | 3 | 1 |
| Case 93 | 4 | 169,801,952 | 170,801,990 | 2 | 0 | 2 | 1 |
| Case 93 | 4 | 170,807,597 | 171,481,511 | 3 | 0 | 3 | 1 |
| Case 93 | 4 | 171,484,438 | 180,246,936 | 2 | 0 | 2 | 1 |
| Case 93 | 4 | 180,248,838 | 185,801,346 | 2 | 1 | 3 | 0 |
| Case 93 | 4 | 185,801,567 | 186,180,187 | 3 | 1 | 4 | 0 |
| Case 93 | 4 | 186,185,293 | 186,379,899 | 3 | 0 | 3 | 1 |
| Case 93 | 4 | 186,379,955 | 190,963,766 | 2 | 1 | 3 | 0 |
| Case 93 | 5 | 38,139      | 45,841,630  | 2 | 2 | 4 | 0 |
| Case 93 | 5 | 45,874,923  | 46,399,093  | 2 | 1 | 3 | 0 |
| Case 93 | 5 | 49,457,282  | 49,492,838  | 2 | 1 | 3 | 0 |
| Case 93 | 5 | 49,522,346  | 67,954,756  | 2 | 2 | 4 | 0 |
| Case 93 | 5 | 67,959,925  | 68,662,136  | 2 | 0 | 2 | 1 |
| Case 93 | 5 | 68,662,380  | 68,786,780  | 2 | 2 | 4 | 0 |
| Case 93 | 5 | 68,788,261  | 70,873,013  | 2 | 0 | 2 | 1 |
| Case 93 | 5 | 70,885,973  | 71,290,379  | 3 | 0 | 3 | 1 |
| Case 93 | 5 | 71,295,157  | 89,769,728  | 2 | 2 | 4 | 0 |
| Case 93 | 5 | 89,769,974  | 90,229,426  | 2 | 1 | 3 | 0 |
| Case 93 | 5 | 90,229,807  | 98,779,530  | 2 | 2 | 4 | 0 |
| Case 93 | 5 | 98,781,103  | 100,693,051 | 2 | 0 | 2 | 1 |
| Case 93 | 5 | 100,695,179 | 100,914,502 | 3 | 0 | 3 | 1 |
| Case 93 | 5 | 100,918,526 | 101,584,499 | 0 | 0 | 0 | 0 |
| Case 93 | 5 | 101,585,209 | 102,345,565 | 2 | 0 | 2 | 1 |
| Case 93 | 5 | 102,352,034 | 102,781,533 | 2 | 1 | 3 | 0 |
| Case 93 | 5 | 102,793,568 | 103,119,367 | 2 | 2 | 4 | 0 |
| Case 93 | 5 | 103,122,923 | 105,846,299 | 2 | 1 | 3 | 0 |
| Case 93 | 5 | 105,849,895 | 121,740,909 | 2 | 2 | 4 | 0 |
| Case 93 | 5 | 121,750,329 | 125,382,324 | 2 | 0 | 2 | 1 |
| Case 93 | 5 | 125,382,449 | 127,298,499 | 3 | 0 | 3 | 1 |
| Case 93 | 5 | 127,304,700 | 127,728,858 | 2 | 0 | 2 | 1 |
| Case 93 | 5 | 127,729,008 | 128,302,155 | 3 | 0 | 3 | 1 |
| Case 93 | 5 | 128,302,174 | 128,596,232 | 2 | 0 | 2 | 1 |

|         |   |             |             |   |   |   |   |
|---------|---|-------------|-------------|---|---|---|---|
| Case 93 | 5 | 128,607,170 | 139,745,800 | 2 | 2 | 4 | 0 |
| Case 93 | 5 | 139,747,064 | 139,931,384 | 3 | 0 | 3 | 1 |
| Case 93 | 5 | 139,931,607 | 139,936,823 | 0 | 0 | 0 | 0 |
| Case 93 | 5 | 139,936,825 | 140,044,576 | 3 | 0 | 3 | 1 |
| Case 93 | 5 | 140,044,604 | 161,680,565 | 2 | 2 | 4 | 0 |
| Case 93 | 5 | 161,681,172 | 162,372,793 | 2 | 1 | 3 | 0 |
| Case 93 | 5 | 162,373,515 | 162,886,563 | 2 | 2 | 4 | 0 |
| Case 93 | 5 | 162,887,650 | 162,990,669 | 2 | 1 | 3 | 0 |
| Case 93 | 5 | 162,991,763 | 168,847,968 | 2 | 2 | 4 | 0 |
| Case 93 | 5 | 168,851,248 | 169,238,342 | 2 | 1 | 3 | 0 |
| Case 93 | 5 | 169,238,673 | 176,731,452 | 2 | 2 | 4 | 0 |
| Case 93 | 5 | 176,731,648 | 177,661,902 | 2 | 1 | 3 | 0 |
| Case 93 | 5 | 177,664,297 | 180,693,127 | 2 | 2 | 4 | 0 |
| Case 93 | 6 | 108,666     | 49,173,407  | 2 | 1 | 3 | 0 |
| Case 93 | 6 | 49,175,210  | 49,701,439  | 1 | 1 | 2 | 0 |
| Case 93 | 6 | 49,701,456  | 50,159,882  | 2 | 1 | 3 | 0 |
| Case 93 | 6 | 50,163,367  | 50,596,453  | 1 | 1 | 2 | 0 |
| Case 93 | 6 | 50,597,061  | 53,293,410  | 2 | 1 | 3 | 0 |
| Case 93 | 6 | 53,295,203  | 53,464,357  | 1 | 1 | 2 | 0 |
| Case 93 | 6 | 53,465,000  | 54,003,184  | 2 | 1 | 3 | 0 |
| Case 93 | 6 | 54,013,873  | 55,214,895  | 1 | 1 | 2 | 0 |
| Case 93 | 6 | 55,214,932  | 55,687,414  | 2 | 1 | 3 | 0 |
| Case 93 | 6 | 55,688,361  | 56,102,709  | 1 | 1 | 2 | 0 |
| Case 93 | 6 | 56,102,780  | 57,984,494  | 2 | 1 | 3 | 0 |
| Case 93 | 6 | 57,987,300  | 58,752,089  | 1 | 1 | 2 | 0 |
| Case 93 | 6 | 61,891,118  | 62,775,947  | 1 | 1 | 2 | 0 |
| Case 93 | 6 | 62,786,386  | 67,893,198  | 2 | 1 | 3 | 0 |
| Case 93 | 6 | 67,895,080  | 78,965,525  | 2 | 2 | 4 | 0 |
| Case 93 | 6 | 78,972,930  | 79,029,367  | 2 | 0 | 2 | 1 |
| Case 93 | 6 | 79,039,234  | 97,498,501  | 2 | 2 | 4 | 0 |
| Case 93 | 6 | 97,501,179  | 98,919,264  | 2 | 1 | 3 | 0 |
| Case 93 | 6 | 98,927,363  | 148,044,515 | 2 | 2 | 4 | 0 |
| Case 93 | 6 | 148,045,181 | 148,195,569 | 2 | 1 | 3 | 0 |
| Case 93 | 6 | 148,202,273 | 153,454,558 | 2 | 2 | 4 | 0 |
| Case 93 | 6 | 153,457,680 | 153,822,736 | 2 | 1 | 3 | 0 |
| Case 93 | 6 | 153,827,582 | 170,980,171 | 2 | 2 | 4 | 0 |
| Case 93 | 7 | 44,935      | 65,765      | 4 | 0 | 4 | 1 |
| Case 93 | 7 | 67,365      | 1,945,288   | 3 | 1 | 4 | 0 |
| Case 93 | 7 | 1,947,895   | 2,004,421   | 3 | 0 | 3 | 1 |
| Case 93 | 7 | 2,012,457   | 3,113,034   | 2 | 1 | 3 | 0 |
| Case 93 | 7 | 3,117,874   | 5,103,404   | 3 | 1 | 4 | 0 |
| Case 93 | 7 | 5,103,447   | 5,146,319   | 3 | 0 | 3 | 1 |
| Case 93 | 7 | 5,150,581   | 6,035,211   | 3 | 1 | 4 | 0 |
| Case 93 | 7 | 6,035,238   | 6,078,221   | 3 | 0 | 3 | 1 |
| Case 93 | 7 | 6,078,248   | 7,315,815   | 4 | 0 | 4 | 1 |
| Case 93 | 7 | 7,316,391   | 9,224,481   | 3 | 1 | 4 | 0 |
| Case 93 | 7 | 9,229,882   | 9,542,315   | 3 | 0 | 3 | 1 |
| Case 93 | 7 | 9,550,478   | 9,965,912   | 3 | 1 | 4 | 0 |
| Case 93 | 7 | 9,968,807   | 10,428,228  | 3 | 0 | 3 | 1 |
| Case 93 | 7 | 10,431,446  | 11,509,538  | 3 | 1 | 4 | 0 |
| Case 93 | 7 | 11,509,561  | 11,512,299  | 3 | 0 | 3 | 1 |
| Case 93 | 7 | 11,512,425  | 11,614,579  | 4 | 0 | 4 | 1 |
| Case 93 | 7 | 11,615,654  | 12,254,552  | 3 | 0 | 3 | 1 |
| Case 93 | 7 | 12,257,728  | 12,618,764  | 4 | 0 | 4 | 1 |
| Case 93 | 7 | 12,620,766  | 13,021,705  | 3 | 0 | 3 | 1 |
| Case 93 | 7 | 13,024,467  | 13,734,285  | 3 | 1 | 4 | 0 |
| Case 93 | 7 | 13,741,691  | 16,059,564  | 3 | 0 | 3 | 1 |
| Case 93 | 7 | 16,060,201  | 16,388,624  | 4 | 0 | 4 | 1 |
| Case 93 | 7 | 16,388,904  | 16,389,412  | 3 | 1 | 4 | 0 |
| Case 93 | 7 | 16,399,003  | 16,570,929  | 3 | 0 | 3 | 1 |
| Case 93 | 7 | 16,572,051  | 16,977,505  | 4 | 0 | 4 | 1 |

|         |   |             |             |   |   |   |   |
|---------|---|-------------|-------------|---|---|---|---|
| Case 93 | 7 | 16,979,542  | 17,528,021  | 3 | 1 | 4 | 0 |
| Case 93 | 7 | 17,528,130  | 18,128,248  | 4 | 1 | 5 | 0 |
| Case 93 | 7 | 18,150,005  | 18,200,205  | 3 | 0 | 3 | 1 |
| Case 93 | 7 | 18,215,216  | 18,301,455  | 1 | 0 | 1 | 0 |
| Case 93 | 7 | 18,310,791  | 18,370,302  | 3 | 0 | 3 | 1 |
| Case 93 | 7 | 18,382,590  | 18,991,904  | 3 | 1 | 4 | 0 |
| Case 93 | 7 | 18,993,249  | 20,147,715  | 3 | 0 | 3 | 1 |
| Case 93 | 7 | 20,149,537  | 21,021,498  | 2 | 1 | 3 | 0 |
| Case 93 | 7 | 21,023,562  | 21,086,373  | 4 | 0 | 4 | 1 |
| Case 93 | 7 | 21,087,077  | 21,350,308  | 3 | 1 | 4 | 0 |
| Case 93 | 7 | 21,351,951  | 21,584,742  | 3 | 0 | 3 | 1 |
| Case 93 | 7 | 21,586,595  | 38,277,792  | 3 | 1 | 4 | 0 |
| Case 93 | 7 | 38,288,270  | 38,364,289  | 4 | 1 | 5 | 0 |
| Case 93 | 7 | 38,367,259  | 41,988,488  | 3 | 1 | 4 | 0 |
| Case 93 | 7 | 41,989,362  | 42,318,852  | 3 | 0 | 3 | 1 |
| Case 93 | 7 | 42,319,056  | 46,331,207  | 3 | 1 | 4 | 0 |
| Case 93 | 7 | 46,331,712  | 46,611,204  | 3 | 0 | 3 | 1 |
| Case 93 | 7 | 46,611,854  | 47,064,694  | 4 | 0 | 4 | 1 |
| Case 93 | 7 | 47,070,010  | 48,319,307  | 3 | 1 | 4 | 0 |
| Case 93 | 7 | 48,319,403  | 48,467,355  | 3 | 0 | 3 | 1 |
| Case 93 | 7 | 48,479,620  | 53,025,804  | 3 | 1 | 4 | 0 |
| Case 93 | 7 | 53,031,792  | 54,430,725  | 3 | 0 | 3 | 1 |
| Case 93 | 7 | 54,430,805  | 54,444,505  | 2 | 1 | 3 | 0 |
| Case 93 | 7 | 54,467,507  | 54,467,507  | 1 | 1 | 2 | 0 |
| Case 93 | 7 | 54,491,582  | 55,442,803  | 5 | 2 | 7 | 0 |
| Case 93 | 7 | 55,456,524  | 55,459,501  | 2 | 1 | 3 | 0 |
| Case 93 | 7 | 55,459,563  | 55,882,199  | 3 | 0 | 3 | 1 |
| Case 93 | 7 | 55,885,674  | 56,357,799  | 3 | 1 | 4 | 0 |
| Case 93 | 7 | 56,394,784  | 58,019,061  | 3 | 0 | 3 | 1 |
| Case 93 | 7 | 61,056,053  | 66,805,000  | 3 | 0 | 3 | 1 |
| Case 93 | 7 | 66,814,900  | 80,654,259  | 3 | 1 | 4 | 0 |
| Case 93 | 7 | 80,660,357  | 86,554,948  | 5 | 1 | 6 | 0 |
| Case 93 | 7 | 86,554,972  | 88,933,320  | 4 | 3 | 7 | 0 |
| Case 93 | 7 | 88,934,119  | 88,965,609  | 5 | 0 | 5 | 1 |
| Case 93 | 7 | 88,965,614  | 88,969,883  | 4 | 1 | 5 | 0 |
| Case 93 | 7 | 88,974,907  | 88,974,907  | 5 | 0 | 5 | 1 |
| Case 93 | 7 | 88,981,054  | 94,281,335  | 5 | 1 | 6 | 0 |
| Case 93 | 7 | 94,285,567  | 94,294,682  | 2 | 1 | 3 | 0 |
| Case 93 | 7 | 94,294,798  | 95,624,677  | 6 | 1 | 7 | 0 |
| Case 93 | 7 | 95,625,371  | 95,625,371  | 1 | 1 | 2 | 0 |
| Case 93 | 7 | 95,626,133  | 100,628,107 | 7 | 0 | 7 | 1 |
| Case 93 | 7 | 100,633,938 | 100,695,140 | 5 | 0 | 5 | 1 |
| Case 93 | 7 | 100,696,271 | 104,362,704 | 7 | 0 | 7 | 1 |
| Case 93 | 7 | 104,368,522 | 109,166,664 | 2 | 1 | 3 | 0 |
| Case 93 | 7 | 109,168,430 | 149,486,246 | 2 | 2 | 4 | 0 |
| Case 93 | 7 | 149,486,256 | 149,522,162 | 2 | 1 | 3 | 0 |
| Case 93 | 7 | 149,522,165 | 159,119,486 | 2 | 2 | 4 | 0 |
| Case 93 | 8 | 164,984     | 231,272     | 2 | 1 | 3 | 0 |
| Case 93 | 8 | 231,287     | 43,053,062  | 2 | 2 | 4 | 0 |
| Case 93 | 8 | 43,054,553  | 43,791,691  | 2 | 1 | 3 | 0 |
| Case 93 | 8 | 46,886,735  | 48,038,831  | 2 | 1 | 3 | 0 |
| Case 93 | 8 | 48,089,751  | 82,607,130  | 2 | 2 | 4 | 0 |
| Case 93 | 8 | 82,614,003  | 83,237,630  | 2 | 1 | 3 | 0 |
| Case 93 | 8 | 83,244,535  | 89,272,062  | 2 | 2 | 4 | 0 |
| Case 93 | 8 | 89,273,678  | 90,220,200  | 2 | 0 | 2 | 1 |
| Case 93 | 8 | 90,228,651  | 90,283,685  | 3 | 0 | 3 | 1 |
| Case 93 | 8 | 90,289,326  | 90,490,180  | 1 | 0 | 1 | 0 |
| Case 93 | 8 | 90,520,649  | 90,795,302  | 3 | 0 | 3 | 1 |
| Case 93 | 8 | 90,795,768  | 100,108,613 | 2 | 2 | 4 | 0 |
| Case 93 | 8 | 100,115,328 | 100,136,131 | 2 | 0 | 2 | 1 |
| Case 93 | 8 | 100,141,089 | 146,293,414 | 2 | 2 | 4 | 0 |

|         |   |            |             |   |   |   |   |
|---------|---|------------|-------------|---|---|---|---|
| Case 93 | 9 | 46,587     | 2,271,526   | 2 | 0 | 2 | 1 |
| Case 93 | 9 | 2,272,512  | 2,282,951   | 3 | 0 | 3 | 1 |
| Case 93 | 9 | 2,285,443  | 2,593,528   | 1 | 0 | 1 | 0 |
| Case 93 | 9 | 2,596,569  | 2,597,250   | 3 | 0 | 3 | 1 |
| Case 93 | 9 | 2,598,844  | 4,959,331   | 2 | 0 | 2 | 1 |
| Case 93 | 9 | 4,964,774  | 4,970,909   | 3 | 0 | 3 | 1 |
| Case 93 | 9 | 4,972,398  | 5,792,106   | 1 | 0 | 1 | 0 |
| Case 93 | 9 | 5,792,156  | 8,141,003   | 2 | 0 | 2 | 1 |
| Case 93 | 9 | 8,142,392  | 8,143,737   | 3 | 0 | 3 | 1 |
| Case 93 | 9 | 8,144,973  | 8,436,680   | 1 | 0 | 1 | 0 |
| Case 93 | 9 | 8,436,963  | 8,715,082   | 2 | 0 | 2 | 1 |
| Case 93 | 9 | 8,718,703  | 8,718,703   | 3 | 0 | 3 | 1 |
| Case 93 | 9 | 8,719,261  | 8,854,069   | 1 | 0 | 1 | 0 |
| Case 93 | 9 | 8,855,603  | 8,873,449   | 3 | 0 | 3 | 1 |
| Case 93 | 9 | 8,875,659  | 14,365,307  | 1 | 0 | 1 | 0 |
| Case 93 | 9 | 14,367,505 | 14,376,009  | 3 | 0 | 3 | 1 |
| Case 93 | 9 | 14,376,038 | 15,289,941  | 2 | 0 | 2 | 1 |
| Case 93 | 9 | 15,289,986 | 15,289,986  | 3 | 0 | 3 | 1 |
| Case 93 | 9 | 15,290,012 | 16,012,046  | 1 | 0 | 1 | 0 |
| Case 93 | 9 | 16,012,225 | 16,016,603  | 3 | 0 | 3 | 1 |
| Case 93 | 9 | 16,020,997 | 17,120,621  | 2 | 0 | 2 | 1 |
| Case 93 | 9 | 17,130,360 | 17,509,083  | 1 | 0 | 1 | 0 |
| Case 93 | 9 | 17,511,064 | 17,736,342  | 4 | 0 | 4 | 1 |
| Case 93 | 9 | 17,738,857 | 17,990,785  | 3 | 0 | 3 | 1 |
| Case 93 | 9 | 17,993,589 | 18,212,306  | 4 | 0 | 4 | 1 |
| Case 93 | 9 | 18,214,878 | 18,580,905  | 3 | 0 | 3 | 1 |
| Case 93 | 9 | 18,582,065 | 18,916,311  | 4 | 0 | 4 | 1 |
| Case 93 | 9 | 18,917,251 | 19,419,528  | 3 | 0 | 3 | 1 |
| Case 93 | 9 | 19,420,040 | 21,304,245  | 4 | 0 | 4 | 1 |
| Case 93 | 9 | 21,304,720 | 21,405,363  | 3 | 0 | 3 | 1 |
| Case 93 | 9 | 21,409,506 | 22,711,948  | 0 | 0 | 0 | 0 |
| Case 93 | 9 | 22,724,188 | 22,731,935  | 3 | 0 | 3 | 1 |
| Case 93 | 9 | 22,739,631 | 23,059,458  | 4 | 0 | 4 | 1 |
| Case 93 | 9 | 23,059,968 | 24,754,015  | 3 | 0 | 3 | 1 |
| Case 93 | 9 | 24,756,027 | 27,182,802  | 1 | 0 | 1 | 0 |
| Case 93 | 9 | 27,182,825 | 27,228,754  | 1 | 1 | 2 | 0 |
| Case 93 | 9 | 27,229,141 | 27,924,051  | 1 | 0 | 1 | 0 |
| Case 93 | 9 | 27,924,555 | 27,974,507  | 1 | 1 | 2 | 0 |
| Case 93 | 9 | 27,974,577 | 31,938,495  | 1 | 0 | 1 | 0 |
| Case 93 | 9 | 31,951,536 | 46,944,322  | 3 | 0 | 3 | 1 |
| Case 93 | 9 | 65,629,772 | 73,598,428  | 3 | 0 | 3 | 1 |
| Case 93 | 9 | 73,598,465 | 74,067,610  | 2 | 0 | 2 | 1 |
| Case 93 | 9 | 74,070,471 | 77,332,549  | 3 | 0 | 3 | 1 |
| Case 93 | 9 | 77,332,745 | 77,846,356  | 2 | 0 | 2 | 1 |
| Case 93 | 9 | 77,848,630 | 78,643,712  | 3 | 0 | 3 | 1 |
| Case 93 | 9 | 78,647,201 | 78,651,988  | 0 | 0 | 0 | 0 |
| Case 93 | 9 | 78,653,823 | 79,636,426  | 3 | 0 | 3 | 1 |
| Case 93 | 9 | 79,637,519 | 80,032,108  | 2 | 0 | 2 | 1 |
| Case 93 | 9 | 80,039,006 | 82,443,844  | 3 | 0 | 3 | 1 |
| Case 93 | 9 | 82,449,195 | 84,073,624  | 2 | 0 | 2 | 1 |
| Case 93 | 9 | 84,074,754 | 84,148,456  | 3 | 0 | 3 | 1 |
| Case 93 | 9 | 84,152,604 | 84,521,381  | 1 | 0 | 1 | 0 |
| Case 93 | 9 | 84,528,161 | 88,069,314  | 3 | 0 | 3 | 1 |
| Case 93 | 9 | 88,070,889 | 88,648,217  | 2 | 0 | 2 | 1 |
| Case 93 | 9 | 88,648,274 | 93,090,915  | 3 | 0 | 3 | 1 |
| Case 93 | 9 | 93,093,378 | 93,570,505  | 2 | 0 | 2 | 1 |
| Case 93 | 9 | 93,571,341 | 95,142,121  | 3 | 0 | 3 | 1 |
| Case 93 | 9 | 95,142,122 | 95,898,531  | 2 | 0 | 2 | 1 |
| Case 93 | 9 | 95,899,771 | 99,519,505  | 3 | 0 | 3 | 1 |
| Case 93 | 9 | 99,521,119 | 99,606,224  | 2 | 0 | 2 | 1 |
| Case 93 | 9 | 99,606,529 | 102,275,382 | 3 | 0 | 3 | 1 |

|         |    |             |             |   |   |   |   |
|---------|----|-------------|-------------|---|---|---|---|
| Case 93 | 9  | 102,277,921 | 103,108,449 | 2 | 0 | 2 | 1 |
| Case 93 | 9  | 103,109,070 | 103,485,819 | 3 | 0 | 3 | 1 |
| Case 93 | 9  | 103,486,169 | 103,848,006 | 2 | 0 | 2 | 1 |
| Case 93 | 9  | 103,848,261 | 104,068,262 | 3 | 0 | 3 | 1 |
| Case 93 | 9  | 104,068,545 | 104,333,043 | 2 | 0 | 2 | 1 |
| Case 93 | 9  | 104,334,333 | 104,554,756 | 3 | 0 | 3 | 1 |
| Case 93 | 9  | 104,555,316 | 107,050,093 | 2 | 0 | 2 | 1 |
| Case 93 | 9  | 107,054,520 | 113,581,359 | 3 | 0 | 3 | 1 |
| Case 93 | 9  | 113,582,050 | 113,791,313 | 2 | 0 | 2 | 1 |
| Case 93 | 9  | 113,792,706 | 121,363,428 | 3 | 0 | 3 | 1 |
| Case 93 | 9  | 121,364,552 | 121,670,536 | 2 | 0 | 2 | 1 |
| Case 93 | 9  | 121,698,714 | 123,791,936 | 3 | 0 | 3 | 1 |
| Case 93 | 9  | 123,792,679 | 123,924,221 | 2 | 0 | 2 | 1 |
| Case 93 | 9  | 123,924,470 | 127,661,756 | 3 | 0 | 3 | 1 |
| Case 93 | 9  | 127,662,748 | 127,942,240 | 2 | 0 | 2 | 1 |
| Case 93 | 9  | 127,948,321 | 131,419,422 | 3 | 0 | 3 | 1 |
| Case 93 | 9  | 131,437,159 | 131,475,468 | 1 | 0 | 1 | 0 |
| Case 93 | 9  | 131,475,583 | 131,762,080 | 3 | 0 | 3 | 1 |
| Case 93 | 9  | 131,763,850 | 131,891,373 | 2 | 0 | 2 | 1 |
| Case 93 | 9  | 131,897,131 | 136,290,672 | 3 | 0 | 3 | 1 |
| Case 93 | 9  | 136,291,063 | 136,341,407 | 2 | 0 | 2 | 1 |
| Case 93 | 9  | 136,342,768 | 139,103,277 | 3 | 0 | 3 | 1 |
| Case 93 | 9  | 139,103,284 | 139,279,173 | 2 | 0 | 2 | 1 |
| Case 93 | 9  | 139,279,245 | 139,575,487 | 3 | 0 | 3 | 1 |
| Case 93 | 9  | 139,578,880 | 139,757,333 | 2 | 0 | 2 | 1 |
| Case 93 | 9  | 139,757,424 | 140,007,546 | 3 | 0 | 3 | 1 |
| Case 93 | 9  | 140,007,817 | 140,127,809 | 2 | 0 | 2 | 1 |
| Case 93 | 9  | 140,127,856 | 140,161,526 | 3 | 0 | 3 | 1 |
| Case 93 | 9  | 140,164,250 | 140,392,579 | 2 | 0 | 2 | 1 |
| Case 93 | 9  | 140,392,623 | 141,066,491 | 3 | 0 | 3 | 1 |
| Case 93 | 10 | 98,087      | 2,148,732   | 2 | 1 | 3 | 0 |
| Case 93 | 10 | 2,148,963   | 4,458,882   | 3 | 0 | 3 | 1 |
| Case 93 | 10 | 4,464,252   | 4,780,818   | 2 | 0 | 2 | 1 |
| Case 93 | 10 | 4,781,029   | 7,605,243   | 3 | 0 | 3 | 1 |
| Case 93 | 10 | 7,605,263   | 7,660,490   | 2 | 0 | 2 | 1 |
| Case 93 | 10 | 7,661,011   | 8,696,383   | 3 | 0 | 3 | 1 |
| Case 93 | 10 | 8,696,446   | 10,195,010  | 2 | 0 | 2 | 1 |
| Case 93 | 10 | 10,204,589  | 15,609,839  | 3 | 0 | 3 | 1 |
| Case 93 | 10 | 15,613,080  | 16,068,563  | 2 | 0 | 2 | 1 |
| Case 93 | 10 | 16,070,792  | 16,581,889  | 3 | 0 | 3 | 1 |
| Case 93 | 10 | 16,583,249  | 16,787,560  | 2 | 0 | 2 | 1 |
| Case 93 | 10 | 16,790,231  | 17,495,619  | 3 | 0 | 3 | 1 |
| Case 93 | 10 | 17,498,867  | 17,746,301  | 2 | 0 | 2 | 1 |
| Case 93 | 10 | 17,746,464  | 18,254,428  | 3 | 0 | 3 | 1 |
| Case 93 | 10 | 18,254,595  | 18,351,573  | 2 | 0 | 2 | 1 |
| Case 93 | 10 | 18,352,728  | 18,742,477  | 3 | 0 | 3 | 1 |
| Case 93 | 10 | 18,743,060  | 39,097,912  | 2 | 1 | 3 | 0 |
| Case 93 | 10 | 42,436,301  | 70,616,199  | 2 | 1 | 3 | 0 |
| Case 93 | 10 | 70,616,517  | 70,747,353  | 2 | 2 | 4 | 0 |
| Case 93 | 10 | 70,748,656  | 73,699,145  | 2 | 1 | 3 | 0 |
| Case 93 | 10 | 73,707,100  | 74,043,803  | 3 | 0 | 3 | 1 |
| Case 93 | 10 | 74,046,370  | 101,489,476 | 2 | 1 | 3 | 0 |
| Case 93 | 10 | 101,491,236 | 101,668,986 | 2 | 2 | 4 | 0 |
| Case 93 | 10 | 101,682,176 | 135,477,883 | 2 | 1 | 3 | 0 |
| Case 93 | 11 | 193,146     | 51,591,253  | 2 | 1 | 3 | 0 |
| Case 93 | 11 | 54,794,237  | 56,185,549  | 2 | 1 | 3 | 0 |
| Case 93 | 11 | 56,185,557  | 56,431,667  | 2 | 2 | 4 | 0 |
| Case 93 | 11 | 56,431,691  | 134,934,063 | 2 | 1 | 3 | 0 |
| Case 93 | 12 | 191,619     | 34,826,574  | 2 | 2 | 4 | 0 |
| Case 93 | 12 | 34,853,011  | 34,853,011  | 2 | 1 | 3 | 0 |
| Case 93 | 12 | 37,876,400  | 38,713,745  | 2 | 1 | 3 | 0 |

|         |    |             |             |   |   |   |   |
|---------|----|-------------|-------------|---|---|---|---|
| Case 93 | 12 | 38,713,970  | 42,181,605  | 2 | 2 | 4 | 0 |
| Case 93 | 12 | 42,183,271  | 44,782,279  | 2 | 1 | 3 | 0 |
| Case 93 | 12 | 44,783,123  | 46,239,012  | 2 | 2 | 4 | 0 |
| Case 93 | 12 | 46,240,639  | 48,232,747  | 2 | 1 | 3 | 0 |
| Case 93 | 12 | 48,234,917  | 48,920,198  | 2 | 2 | 4 | 0 |
| Case 93 | 12 | 48,920,261  | 49,987,929  | 2 | 1 | 3 | 0 |
| Case 93 | 12 | 49,992,644  | 52,550,467  | 2 | 2 | 4 | 0 |
| Case 93 | 12 | 52,551,190  | 52,841,075  | 2 | 1 | 3 | 0 |
| Case 93 | 12 | 52,842,101  | 52,959,576  | 2 | 2 | 4 | 0 |
| Case 93 | 12 | 52,960,068  | 53,071,560  | 2 | 1 | 3 | 0 |
| Case 93 | 12 | 53,072,391  | 53,152,801  | 2 | 2 | 4 | 0 |
| Case 93 | 12 | 53,153,128  | 53,494,922  | 2 | 1 | 3 | 0 |
| Case 93 | 12 | 53,495,878  | 53,670,433  | 2 | 2 | 4 | 0 |
| Case 93 | 12 | 53,670,490  | 53,705,703  | 2 | 1 | 3 | 0 |
| Case 93 | 12 | 53,708,133  | 55,098,996  | 2 | 2 | 4 | 0 |
| Case 93 | 12 | 55,102,834  | 55,917,786  | 2 | 1 | 3 | 0 |
| Case 93 | 12 | 55,920,273  | 57,453,699  | 2 | 2 | 4 | 0 |
| Case 93 | 12 | 57,454,720  | 58,017,701  | 2 | 1 | 3 | 0 |
| Case 93 | 12 | 58,017,860  | 59,956,876  | 2 | 2 | 4 | 0 |
| Case 93 | 12 | 59,956,903  | 63,019,450  | 2 | 1 | 3 | 0 |
| Case 93 | 12 | 63,020,745  | 63,449,965  | 2 | 2 | 4 | 0 |
| Case 93 | 12 | 63,450,682  | 64,217,419  | 2 | 1 | 3 | 0 |
| Case 93 | 12 | 64,234,926  | 65,391,905  | 2 | 2 | 4 | 0 |
| Case 93 | 12 | 65,393,186  | 66,986,752  | 2 | 1 | 3 | 0 |
| Case 93 | 12 | 66,988,915  | 68,804,230  | 2 | 2 | 4 | 0 |
| Case 93 | 12 | 68,805,998  | 69,140,505  | 2 | 1 | 3 | 0 |
| Case 93 | 12 | 69,145,876  | 69,424,967  | 2 | 2 | 4 | 0 |
| Case 93 | 12 | 69,428,947  | 69,757,931  | 2 | 1 | 3 | 0 |
| Case 93 | 12 | 69,760,861  | 70,382,995  | 2 | 2 | 4 | 0 |
| Case 93 | 12 | 70,383,720  | 70,950,744  | 2 | 1 | 3 | 0 |
| Case 93 | 12 | 70,951,947  | 71,456,867  | 2 | 2 | 4 | 0 |
| Case 93 | 12 | 71,459,064  | 75,935,157  | 2 | 1 | 3 | 0 |
| Case 93 | 12 | 75,944,025  | 76,314,406  | 2 | 2 | 4 | 0 |
| Case 93 | 12 | 76,315,825  | 78,158,107  | 2 | 1 | 3 | 0 |
| Case 93 | 12 | 78,162,472  | 78,336,758  | 2 | 2 | 4 | 0 |
| Case 93 | 12 | 78,346,579  | 79,643,494  | 2 | 1 | 3 | 0 |
| Case 93 | 12 | 79,645,035  | 80,628,573  | 2 | 2 | 4 | 0 |
| Case 93 | 12 | 80,632,556  | 92,290,715  | 2 | 1 | 3 | 0 |
| Case 93 | 12 | 92,297,155  | 92,538,189  | 2 | 2 | 4 | 0 |
| Case 93 | 12 | 92,539,590  | 94,466,100  | 2 | 1 | 3 | 0 |
| Case 93 | 12 | 94,466,714  | 94,701,318  | 2 | 2 | 4 | 0 |
| Case 93 | 12 | 94,702,659  | 95,073,060  | 2 | 1 | 3 | 0 |
| Case 93 | 12 | 95,083,114  | 99,304,404  | 2 | 2 | 4 | 0 |
| Case 93 | 12 | 99,308,770  | 100,857,873 | 2 | 1 | 3 | 0 |
| Case 93 | 12 | 100,866,455 | 101,377,010 | 2 | 2 | 4 | 0 |
| Case 93 | 12 | 101,381,132 | 101,587,465 | 2 | 1 | 3 | 0 |
| Case 93 | 12 | 101,587,518 | 124,520,331 | 2 | 2 | 4 | 0 |
| Case 93 | 12 | 124,525,443 | 124,843,104 | 3 | 0 | 3 | 1 |
| Case 93 | 12 | 124,843,999 | 133,682,198 | 2 | 2 | 4 | 0 |
| Case 93 | 12 | 133,682,655 | 133,810,935 | 2 | 1 | 3 | 0 |
| Case 93 | 13 | 19,058,717  | 20,716,818  | 2 | 0 | 2 | 1 |
| Case 93 | 13 | 20,717,743  | 21,165,121  | 3 | 0 | 3 | 1 |
| Case 93 | 13 | 21,165,139  | 21,459,802  | 2 | 0 | 2 | 1 |
| Case 93 | 13 | 21,466,641  | 21,689,258  | 3 | 0 | 3 | 1 |
| Case 93 | 13 | 21,689,486  | 21,932,459  | 2 | 0 | 2 | 1 |
| Case 93 | 13 | 21,935,210  | 22,694,394  | 3 | 0 | 3 | 1 |
| Case 93 | 13 | 22,695,311  | 22,766,634  | 2 | 0 | 2 | 1 |
| Case 93 | 13 | 22,769,539  | 23,015,905  | 3 | 0 | 3 | 1 |
| Case 93 | 13 | 23,016,368  | 23,915,299  | 2 | 0 | 2 | 1 |
| Case 93 | 13 | 23,915,372  | 25,082,630  | 3 | 0 | 3 | 1 |
| Case 93 | 13 | 25,084,316  | 25,236,232  | 2 | 0 | 2 | 1 |

|         |    |             |             |   |   |   |   |
|---------|----|-------------|-------------|---|---|---|---|
| Case 93 | 13 | 25,237,481  | 28,916,343  | 3 | 0 | 3 | 1 |
| Case 93 | 13 | 28,919,330  | 28,959,115  | 2 | 2 | 4 | 0 |
| Case 93 | 13 | 28,962,686  | 29,182,634  | 3 | 0 | 3 | 1 |
| Case 93 | 13 | 29,183,420  | 31,938,186  | 2 | 2 | 4 | 0 |
| Case 93 | 13 | 31,943,776  | 31,945,277  | 2 | 0 | 2 | 1 |
| Case 93 | 13 | 31,950,629  | 36,581,506  | 3 | 2 | 5 | 0 |
| Case 93 | 13 | 36,597,522  | 36,597,840  | 4 | 1 | 5 | 0 |
| Case 93 | 13 | 36,598,404  | 36,620,484  | 2 | 0 | 2 | 1 |
| Case 93 | 13 | 36,625,089  | 46,486,221  | 2 | 2 | 4 | 0 |
| Case 93 | 13 | 46,491,101  | 46,491,101  | 2 | 0 | 2 | 1 |
| Case 93 | 13 | 46,494,486  | 56,137,423  | 3 | 2 | 5 | 0 |
| Case 93 | 13 | 56,146,159  | 56,146,159  | 4 | 1 | 5 | 0 |
| Case 93 | 13 | 56,146,197  | 56,306,848  | 3 | 0 | 3 | 1 |
| Case 93 | 13 | 56,311,909  | 56,590,135  | 3 | 1 | 4 | 0 |
| Case 93 | 13 | 56,593,465  | 72,675,601  | 3 | 0 | 3 | 1 |
| Case 93 | 13 | 72,676,321  | 73,077,005  | 4 | 0 | 4 | 1 |
| Case 93 | 13 | 73,081,033  | 73,713,447  | 3 | 0 | 3 | 1 |
| Case 93 | 13 | 73,715,441  | 74,303,603  | 4 | 0 | 4 | 1 |
| Case 93 | 13 | 74,308,229  | 78,531,821  | 3 | 0 | 3 | 1 |
| Case 93 | 13 | 78,541,621  | 78,699,820  | 2 | 2 | 4 | 0 |
| Case 93 | 13 | 78,700,474  | 95,316,946  | 3 | 0 | 3 | 1 |
| Case 93 | 13 | 95,319,234  | 95,735,502  | 4 | 0 | 4 | 1 |
| Case 93 | 13 | 95,735,604  | 95,861,793  | 3 | 0 | 3 | 1 |
| Case 93 | 13 | 95,861,804  | 96,306,146  | 4 | 0 | 4 | 1 |
| Case 93 | 13 | 96,307,645  | 97,304,003  | 3 | 0 | 3 | 1 |
| Case 93 | 13 | 97,308,587  | 100,570,435 | 4 | 0 | 4 | 1 |
| Case 93 | 13 | 100,575,093 | 104,933,689 | 3 | 0 | 3 | 1 |
| Case 93 | 13 | 104,934,976 | 105,069,859 | 4 | 0 | 4 | 1 |
| Case 93 | 13 | 105,070,996 | 107,059,500 | 3 | 0 | 3 | 1 |
| Case 93 | 13 | 107,060,125 | 107,822,109 | 4 | 0 | 4 | 1 |
| Case 93 | 13 | 107,823,044 | 109,003,345 | 3 | 0 | 3 | 1 |
| Case 93 | 13 | 109,007,166 | 109,415,758 | 4 | 0 | 4 | 1 |
| Case 93 | 13 | 109,417,543 | 109,691,188 | 3 | 0 | 3 | 1 |
| Case 93 | 13 | 109,693,885 | 109,859,945 | 4 | 0 | 4 | 1 |
| Case 93 | 13 | 109,860,174 | 111,902,870 | 3 | 0 | 3 | 1 |
| Case 93 | 13 | 111,916,481 | 112,872,427 | 4 | 0 | 4 | 1 |
| Case 93 | 13 | 112,875,786 | 113,835,536 | 3 | 0 | 3 | 1 |
| Case 93 | 13 | 113,838,725 | 114,309,237 | 4 | 0 | 4 | 1 |
| Case 93 | 13 | 114,311,880 | 115,103,529 | 3 | 0 | 3 | 1 |
| Case 93 | 14 | 19,280,733  | 20,420,338  | 3 | 0 | 3 | 1 |
| Case 93 | 14 | 20,425,051  | 22,153,004  | 4 | 0 | 4 | 1 |
| Case 93 | 14 | 22,158,539  | 22,985,006  | 5 | 0 | 5 | 1 |
| Case 93 | 14 | 22,986,656  | 37,713,694  | 4 | 0 | 4 | 1 |
| Case 93 | 14 | 37,714,140  | 38,088,472  | 3 | 0 | 3 | 1 |
| Case 93 | 14 | 38,111,870  | 38,221,992  | 0 | 0 | 0 | 0 |
| Case 93 | 14 | 38,234,632  | 38,246,440  | 3 | 0 | 3 | 1 |
| Case 93 | 14 | 38,248,936  | 107,287,663 | 4 | 0 | 4 | 1 |
| Case 93 | 15 | 20,034,919  | 22,766,739  | 3 | 0 | 3 | 1 |
| Case 93 | 15 | 22,769,771  | 30,353,491  | 2 | 1 | 3 | 0 |
| Case 93 | 15 | 30,354,303  | 30,371,774  | 3 | 0 | 3 | 1 |
| Case 93 | 15 | 30,507,461  | 31,089,526  | 0 | 0 | 0 | 0 |
| Case 93 | 15 | 31,094,479  | 31,293,774  | 3 | 0 | 3 | 1 |
| Case 93 | 15 | 31,294,159  | 83,337,059  | 2 | 1 | 3 | 0 |
| Case 93 | 15 | 83,342,772  | 86,122,865  | 3 | 0 | 3 | 1 |
| Case 93 | 15 | 86,122,875  | 86,198,852  | 2 | 0 | 2 | 1 |
| Case 93 | 15 | 86,198,893  | 87,488,128  | 3 | 0 | 3 | 1 |
| Case 93 | 15 | 87,503,062  | 87,608,414  | 2 | 0 | 2 | 1 |
| Case 93 | 15 | 87,610,951  | 102,461,162 | 2 | 1 | 3 | 0 |
| Case 93 | 16 | 88,165      | 35,285,582  | 2 | 2 | 4 | 0 |
| Case 93 | 16 | 46,450,037  | 51,488,206  | 2 | 2 | 4 | 0 |
| Case 93 | 16 | 51,491,825  | 73,077,574  | 4 | 0 | 4 | 1 |

|         |    |            |            |   |   |   |   |
|---------|----|------------|------------|---|---|---|---|
| Case 93 | 16 | 73,079,212 | 78,458,513 | 5 | 0 | 5 | 1 |
| Case 93 | 16 | 78,458,750 | 78,551,936 | 4 | 0 | 4 | 1 |
| Case 93 | 16 | 78,551,953 | 78,551,953 | 3 | 0 | 3 | 1 |
| Case 93 | 16 | 78,552,496 | 78,581,206 | 1 | 0 | 1 | 0 |
| Case 93 | 16 | 78,584,616 | 78,724,797 | 4 | 0 | 4 | 1 |
| Case 93 | 16 | 78,725,014 | 83,945,874 | 5 | 0 | 5 | 1 |
| Case 93 | 16 | 83,945,949 | 84,228,873 | 4 | 0 | 4 | 1 |
| Case 93 | 16 | 84,229,512 | 87,878,708 | 5 | 0 | 5 | 1 |
| Case 93 | 16 | 87,878,822 | 88,835,579 | 4 | 0 | 4 | 1 |
| Case 93 | 16 | 88,842,953 | 89,293,501 | 5 | 0 | 5 | 1 |
| Case 93 | 16 | 89,293,520 | 90,274,695 | 4 | 0 | 4 | 1 |
| Case 93 | 17 | 11,885     | 102,209    | 3 | 0 | 3 | 1 |
| Case 93 | 17 | 103,469    | 1,510,258  | 4 | 0 | 4 | 1 |
| Case 93 | 17 | 1,516,480  | 1,635,669  | 3 | 0 | 3 | 1 |
| Case 93 | 17 | 1,635,686  | 4,436,274  | 4 | 0 | 4 | 1 |
| Case 93 | 17 | 4,436,282  | 4,649,265  | 3 | 0 | 3 | 1 |
| Case 93 | 17 | 4,649,378  | 7,105,399  | 4 | 0 | 4 | 1 |
| Case 93 | 17 | 7,107,367  | 7,323,980  | 3 | 0 | 3 | 1 |
| Case 93 | 17 | 7,324,299  | 7,721,315  | 4 | 0 | 4 | 1 |
| Case 93 | 17 | 7,721,821  | 8,308,781  | 3 | 0 | 3 | 1 |
| Case 93 | 17 | 8,315,649  | 8,707,470  | 4 | 0 | 4 | 1 |
| Case 93 | 17 | 8,708,327  | 8,926,321  | 3 | 0 | 3 | 1 |
| Case 93 | 17 | 8,930,080  | 10,200,348 | 4 | 0 | 4 | 1 |
| Case 93 | 17 | 10,200,522 | 10,555,738 | 3 | 0 | 3 | 1 |
| Case 93 | 17 | 10,558,216 | 11,744,462 | 4 | 0 | 4 | 1 |
| Case 93 | 17 | 11,752,051 | 12,267,102 | 3 | 0 | 3 | 1 |
| Case 93 | 17 | 12,278,913 | 12,609,471 | 4 | 0 | 4 | 1 |
| Case 93 | 17 | 12,609,597 | 13,276,796 | 3 | 0 | 3 | 1 |
| Case 93 | 17 | 13,277,707 | 14,118,304 | 4 | 0 | 4 | 1 |
| Case 93 | 17 | 14,122,553 | 14,269,649 | 3 | 0 | 3 | 1 |
| Case 93 | 17 | 14,269,747 | 14,645,239 | 4 | 0 | 4 | 1 |
| Case 93 | 17 | 14,646,168 | 14,829,498 | 3 | 0 | 3 | 1 |
| Case 93 | 17 | 14,829,915 | 15,373,917 | 4 | 0 | 4 | 1 |
| Case 93 | 17 | 15,374,493 | 17,267,922 | 3 | 0 | 3 | 1 |
| Case 93 | 17 | 17,271,118 | 17,543,722 | 4 | 0 | 4 | 1 |
| Case 93 | 17 | 17,544,704 | 22,242,355 | 3 | 0 | 3 | 1 |
| Case 93 | 17 | 25,268,142 | 25,773,157 | 3 | 0 | 3 | 1 |
| Case 93 | 17 | 25,778,127 | 26,007,668 | 4 | 0 | 4 | 1 |
| Case 93 | 17 | 26,018,955 | 27,283,450 | 3 | 0 | 3 | 1 |
| Case 93 | 17 | 27,283,752 | 27,898,828 | 4 | 0 | 4 | 1 |
| Case 93 | 17 | 27,898,903 | 29,421,200 | 3 | 0 | 3 | 1 |
| Case 93 | 17 | 29,421,869 | 34,597,521 | 4 | 0 | 4 | 1 |
| Case 93 | 17 | 34,815,551 | 34,964,399 | 3 | 0 | 3 | 1 |
| Case 93 | 17 | 34,964,807 | 36,073,196 | 4 | 0 | 4 | 1 |
| Case 93 | 17 | 36,073,320 | 36,509,256 | 3 | 0 | 3 | 1 |
| Case 93 | 17 | 36,516,801 | 37,224,929 | 4 | 0 | 4 | 1 |
| Case 93 | 17 | 37,226,111 | 38,020,141 | 3 | 0 | 3 | 1 |
| Case 93 | 17 | 38,023,441 | 38,851,024 | 4 | 0 | 4 | 1 |
| Case 93 | 17 | 38,854,406 | 40,733,994 | 3 | 0 | 3 | 1 |
| Case 93 | 17 | 40,734,132 | 40,904,492 | 4 | 0 | 4 | 1 |
| Case 93 | 17 | 40,904,514 | 41,166,290 | 3 | 0 | 3 | 1 |
| Case 93 | 17 | 41,166,417 | 41,699,963 | 4 | 0 | 4 | 1 |
| Case 93 | 17 | 41,703,554 | 42,549,992 | 3 | 0 | 3 | 1 |
| Case 93 | 17 | 42,552,212 | 45,542,735 | 4 | 0 | 4 | 1 |
| Case 93 | 17 | 45,633,376 | 46,548,644 | 3 | 0 | 3 | 1 |
| Case 93 | 17 | 46,550,362 | 48,600,427 | 4 | 0 | 4 | 1 |
| Case 93 | 17 | 48,600,459 | 48,838,311 | 3 | 0 | 3 | 1 |
| Case 93 | 17 | 48,840,957 | 50,294,106 | 4 | 0 | 4 | 1 |
| Case 93 | 17 | 50,294,376 | 53,158,524 | 3 | 0 | 3 | 1 |
| Case 93 | 17 | 53,166,323 | 55,918,596 | 4 | 0 | 4 | 1 |
| Case 93 | 17 | 55,926,640 | 56,436,023 | 3 | 0 | 3 | 1 |



|         |    |            |            |   |   |   |   |
|---------|----|------------|------------|---|---|---|---|
| Case 93 | 17 | 56,436,109 | 57,582,867 | 4 | 0 | 4 | 1 |
| Case 93 | 17 | 57,599,128 | 59,255,231 | 3 | 0 | 3 | 1 |
| Case 93 | 17 | 59,258,055 | 59,735,821 | 4 | 0 | 4 | 1 |
| Case 93 | 17 | 59,736,108 | 60,603,969 | 3 | 0 | 3 | 1 |
| Case 93 | 17 | 60,613,661 | 61,166,086 | 4 | 0 | 4 | 1 |
| Case 93 | 17 | 61,172,859 | 61,634,508 | 3 | 0 | 3 | 1 |
| Case 93 | 17 | 61,634,538 | 63,466,131 | 4 | 0 | 4 | 1 |
| Case 93 | 17 | 63,469,057 | 64,210,757 | 3 | 0 | 3 | 1 |
| Case 93 | 17 | 64,212,962 | 66,872,604 | 4 | 0 | 4 | 1 |
| Case 93 | 17 | 66,872,845 | 67,656,119 | 3 | 0 | 3 | 1 |
| Case 93 | 17 | 67,665,781 | 68,724,984 | 4 | 0 | 4 | 1 |
| Case 93 | 17 | 68,728,276 | 69,490,856 | 3 | 0 | 3 | 1 |
| Case 93 | 17 | 69,491,179 | 72,691,961 | 4 | 0 | 4 | 1 |
| Case 93 | 17 | 72,692,527 | 74,155,654 | 3 | 0 | 3 | 1 |
| Case 93 | 17 | 74,158,641 | 76,072,444 | 4 | 0 | 4 | 1 |
| Case 93 | 17 | 76,074,196 | 76,143,434 | 3 | 0 | 3 | 1 |
| Case 93 | 17 | 76,151,386 | 76,989,666 | 4 | 0 | 4 | 1 |
| Case 93 | 17 | 76,989,715 | 77,084,692 | 3 | 0 | 3 | 1 |
| Case 93 | 17 | 77,085,081 | 77,654,711 | 4 | 0 | 4 | 1 |
| Case 93 | 17 | 77,667,579 | 78,358,926 | 3 | 0 | 3 | 1 |
| Case 93 | 17 | 78,358,958 | 78,966,915 | 4 | 0 | 4 | 1 |
| Case 93 | 17 | 78,971,130 | 80,789,037 | 3 | 0 | 3 | 1 |
| Case 93 | 17 | 80,789,156 | 81,000,439 | 4 | 0 | 4 | 1 |
| Case 93 | 17 | 81,004,770 | 81,060,040 | 3 | 0 | 3 | 1 |
| Case 93 | 18 | 87,505     | 15,375,878 | 2 | 1 | 3 | 0 |
| Case 93 | 18 | 18,520,354 | 26,057,722 | 2 | 1 | 3 | 0 |
| Case 93 | 18 | 26,059,112 | 28,892,320 | 2 | 0 | 2 | 1 |
| Case 93 | 18 | 28,892,506 | 29,333,112 | 2 | 1 | 3 | 0 |
| Case 93 | 18 | 29,333,635 | 33,749,871 | 2 | 0 | 2 | 1 |
| Case 93 | 18 | 33,750,046 | 36,105,957 | 2 | 1 | 3 | 0 |
| Case 93 | 18 | 36,106,229 | 42,419,103 | 2 | 0 | 2 | 1 |
| Case 93 | 18 | 42,421,259 | 42,769,020 | 2 | 1 | 3 | 0 |
| Case 93 | 18 | 42,781,787 | 43,223,105 | 2 | 0 | 2 | 1 |
| Case 93 | 18 | 43,224,101 | 43,329,719 | 2 | 1 | 3 | 0 |
| Case 93 | 18 | 43,329,864 | 44,030,044 | 2 | 0 | 2 | 1 |
| Case 93 | 18 | 44,036,029 | 44,293,623 | 3 | 0 | 3 | 1 |
| Case 93 | 18 | 44,294,533 | 47,484,139 | 2 | 0 | 2 | 1 |
| Case 93 | 18 | 47,484,867 | 47,572,613 | 3 | 0 | 3 | 1 |
| Case 93 | 18 | 47,573,051 | 48,164,944 | 2 | 0 | 2 | 1 |
| Case 93 | 18 | 48,165,751 | 48,382,668 | 3 | 0 | 3 | 1 |
| Case 93 | 18 | 48,387,062 | 56,161,396 | 2 | 0 | 2 | 1 |
| Case 93 | 18 | 56,162,113 | 56,205,262 | 3 | 0 | 3 | 1 |
| Case 93 | 18 | 56,206,955 | 71,486,616 | 2 | 0 | 2 | 1 |
| Case 93 | 18 | 71,487,700 | 71,876,587 | 2 | 1 | 3 | 0 |
| Case 93 | 18 | 71,877,967 | 72,053,760 | 2 | 0 | 2 | 1 |
| Case 93 | 18 | 72,055,824 | 72,455,151 | 2 | 1 | 3 | 0 |
| Case 93 | 18 | 72,456,152 | 72,767,269 | 2 | 0 | 2 | 1 |
| Case 93 | 18 | 72,773,309 | 75,127,574 | 2 | 1 | 3 | 0 |
| Case 93 | 18 | 75,135,171 | 76,150,938 | 2 | 0 | 2 | 1 |
| Case 93 | 18 | 76,153,361 | 76,526,710 | 2 | 1 | 3 | 0 |
| Case 93 | 18 | 76,528,007 | 77,107,530 | 2 | 0 | 2 | 1 |
| Case 93 | 18 | 77,109,150 | 77,797,400 | 2 | 1 | 3 | 0 |
| Case 93 | 18 | 77,797,492 | 78,015,180 | 2 | 0 | 2 | 1 |
| Case 93 | 19 | 260,912    | 494,057    | 3 | 0 | 3 | 1 |
| Case 93 | 19 | 495,722    | 629,303    | 2 | 0 | 2 | 1 |
| Case 93 | 19 | 630,096    | 682,010    | 3 | 0 | 3 | 1 |
| Case 93 | 19 | 683,221    | 880,126    | 2 | 0 | 2 | 1 |
| Case 93 | 19 | 881,161    | 1,047,336  | 3 | 0 | 3 | 1 |
| Case 93 | 19 | 1,047,524  | 1,049,360  | 2 | 0 | 2 | 1 |
| Case 93 | 19 | 1,049,396  | 1,053,438  | 1 | 0 | 1 | 0 |
| Case 93 | 19 | 1,053,677  | 1,073,565  | 3 | 0 | 3 | 1 |

|         |    |            |            |   |   |   |   |
|---------|----|------------|------------|---|---|---|---|
| Case 93 | 19 | 1,074,000  | 1,074,010  | 0 | 0 | 0 | 0 |
| Case 93 | 19 | 1,075,979  | 4,502,201  | 3 | 0 | 3 | 1 |
| Case 93 | 19 | 4,504,551  | 4,508,817  | 0 | 0 | 0 | 0 |
| Case 93 | 19 | 4,508,905  | 8,127,331  | 3 | 0 | 3 | 1 |
| Case 93 | 19 | 8,128,460  | 8,160,334  | 2 | 0 | 2 | 1 |
| Case 93 | 19 | 8,160,379  | 9,271,771  | 3 | 0 | 3 | 1 |
| Case 93 | 19 | 9,272,254  | 9,922,084  | 2 | 0 | 2 | 1 |
| Case 93 | 19 | 9,922,216  | 10,624,508 | 3 | 0 | 3 | 1 |
| Case 93 | 19 | 10,624,510 | 10,668,481 | 2 | 0 | 2 | 1 |
| Case 93 | 19 | 10,668,673 | 11,832,649 | 3 | 0 | 3 | 1 |
| Case 93 | 19 | 11,832,835 | 12,692,476 | 2 | 0 | 2 | 1 |
| Case 93 | 19 | 12,693,723 | 15,276,739 | 3 | 0 | 3 | 1 |
| Case 93 | 19 | 15,276,755 | 15,350,625 | 2 | 0 | 2 | 1 |
| Case 93 | 19 | 15,351,749 | 15,795,693 | 3 | 0 | 3 | 1 |
| Case 93 | 19 | 15,795,744 | 15,837,869 | 2 | 0 | 2 | 1 |
| Case 93 | 19 | 15,838,869 | 17,361,203 | 3 | 0 | 3 | 1 |
| Case 93 | 19 | 17,361,222 | 17,370,182 | 1 | 0 | 1 | 0 |
| Case 93 | 19 | 17,370,190 | 19,004,285 | 3 | 0 | 3 | 1 |
| Case 93 | 19 | 19,009,470 | 19,115,094 | 2 | 0 | 2 | 1 |
| Case 93 | 19 | 19,115,264 | 19,817,749 | 3 | 0 | 3 | 1 |
| Case 93 | 19 | 19,819,843 | 19,823,734 | 0 | 0 | 0 | 0 |
| Case 93 | 19 | 19,824,850 | 24,629,285 | 2 | 0 | 2 | 1 |
| Case 93 | 19 | 27,732,159 | 27,828,664 | 2 | 0 | 2 | 1 |
| Case 93 | 19 | 27,862,694 | 28,701,186 | 4 | 1 | 5 | 0 |
| Case 93 | 19 | 28,707,015 | 32,674,746 | 4 | 2 | 6 | 0 |
| Case 93 | 19 | 32,677,182 | 32,845,370 | 4 | 1 | 5 | 0 |
| Case 93 | 19 | 32,845,598 | 33,732,964 | 3 | 2 | 5 | 0 |
| Case 93 | 19 | 33,733,928 | 33,937,322 | 4 | 1 | 5 | 0 |
| Case 93 | 19 | 33,938,800 | 34,838,830 | 3 | 2 | 5 | 0 |
| Case 93 | 19 | 34,838,914 | 36,230,174 | 4 | 1 | 5 | 0 |
| Case 93 | 19 | 36,230,240 | 36,259,116 | 4 | 0 | 4 | 1 |
| Case 93 | 19 | 36,259,292 | 36,339,250 | 4 | 1 | 5 | 0 |
| Case 93 | 19 | 36,339,287 | 36,606,512 | 3 | 2 | 5 | 0 |
| Case 93 | 19 | 36,609,790 | 39,510,778 | 4 | 1 | 5 | 0 |
| Case 93 | 19 | 39,514,844 | 40,276,707 | 3 | 2 | 5 | 0 |
| Case 93 | 19 | 40,278,602 | 40,731,371 | 4 | 1 | 5 | 0 |
| Case 93 | 19 | 40,731,491 | 41,602,470 | 3 | 2 | 5 | 0 |
| Case 93 | 19 | 41,602,530 | 41,892,607 | 4 | 1 | 5 | 0 |
| Case 93 | 19 | 41,893,502 | 44,849,565 | 3 | 2 | 5 | 0 |
| Case 93 | 19 | 44,853,707 | 44,930,348 | 4 | 1 | 5 | 0 |
| Case 93 | 19 | 44,930,430 | 45,910,365 | 3 | 2 | 5 | 0 |
| Case 93 | 19 | 45,910,441 | 46,586,247 | 4 | 1 | 5 | 0 |
| Case 93 | 19 | 46,587,142 | 46,913,749 | 3 | 2 | 5 | 0 |
| Case 93 | 19 | 46,914,459 | 48,950,075 | 4 | 1 | 5 | 0 |
| Case 93 | 19 | 48,951,879 | 50,357,164 | 3 | 2 | 5 | 0 |
| Case 93 | 19 | 50,357,189 | 51,010,939 | 4 | 1 | 5 | 0 |
| Case 93 | 19 | 51,013,325 | 51,676,299 | 3 | 2 | 5 | 0 |
| Case 93 | 19 | 51,676,649 | 51,811,788 | 4 | 1 | 5 | 0 |
| Case 93 | 19 | 51,818,151 | 53,382,381 | 3 | 2 | 5 | 0 |
| Case 93 | 19 | 53,383,865 | 53,993,764 | 4 | 1 | 5 | 0 |
| Case 93 | 19 | 53,995,750 | 54,345,604 | 3 | 2 | 5 | 0 |
| Case 93 | 19 | 54,348,366 | 55,678,015 | 4 | 1 | 5 | 0 |
| Case 93 | 19 | 55,681,833 | 56,321,180 | 3 | 2 | 5 | 0 |
| Case 93 | 19 | 56,321,279 | 56,497,960 | 4 | 1 | 5 | 0 |
| Case 93 | 19 | 56,498,793 | 56,583,306 | 3 | 2 | 5 | 0 |
| Case 93 | 19 | 56,588,096 | 56,733,294 | 4 | 1 | 5 | 0 |
| Case 93 | 19 | 56,733,374 | 57,175,555 | 3 | 2 | 5 | 0 |
| Case 93 | 19 | 57,175,814 | 57,335,875 | 4 | 1 | 5 | 0 |
| Case 93 | 19 | 57,335,976 | 57,839,257 | 4 | 2 | 6 | 0 |
| Case 93 | 19 | 57,839,291 | 57,839,518 | 2 | 1 | 3 | 0 |
| Case 93 | 19 | 57,839,567 | 57,855,930 | 4 | 1 | 5 | 0 |

|         |    |             |             |   |   |   |   |
|---------|----|-------------|-------------|---|---|---|---|
| Case 93 | 19 | 57,858,121  | 58,401,342  | 3 | 2 | 5 | 0 |
| Case 93 | 19 | 58,410,552  | 59,097,160  | 4 | 1 | 5 | 0 |
| Case 93 | 20 | 63,244      | 76,920      | 4 | 0 | 4 | 1 |
| Case 93 | 20 | 76,978      | 14,673,838  | 4 | 1 | 5 | 0 |
| Case 93 | 20 | 14,675,433  | 14,678,135  | 3 | 0 | 3 | 1 |
| Case 93 | 20 | 14,679,497  | 14,884,301  | 1 | 0 | 1 | 0 |
| Case 93 | 20 | 14,890,211  | 15,064,452  | 4 | 0 | 4 | 1 |
| Case 93 | 20 | 15,067,407  | 15,163,265  | 4 | 1 | 5 | 0 |
| Case 93 | 20 | 15,168,697  | 15,237,052  | 2 | 0 | 2 | 1 |
| Case 93 | 20 | 15,241,763  | 16,783,688  | 4 | 1 | 5 | 0 |
| Case 93 | 20 | 16,785,997  | 18,833,210  | 2 | 0 | 2 | 1 |
| Case 93 | 20 | 18,835,278  | 23,009,294  | 4 | 1 | 5 | 0 |
| Case 93 | 20 | 23,011,278  | 23,065,844  | 3 | 2 | 5 | 0 |
| Case 93 | 20 | 23,065,845  | 23,350,941  | 4 | 1 | 5 | 0 |
| Case 93 | 20 | 23,351,333  | 23,813,618  | 3 | 2 | 5 | 0 |
| Case 93 | 20 | 23,815,299  | 26,293,985  | 4 | 1 | 5 | 0 |
| Case 93 | 20 | 29,425,357  | 29,992,847  | 4 | 1 | 5 | 0 |
| Case 93 | 20 | 29,995,517  | 30,818,649  | 3 | 2 | 5 | 0 |
| Case 93 | 20 | 30,818,722  | 32,454,413  | 4 | 1 | 5 | 0 |
| Case 93 | 20 | 32,457,158  | 33,289,225  | 4 | 2 | 6 | 0 |
| Case 93 | 20 | 33,292,777  | 34,994,192  | 4 | 1 | 5 | 0 |
| Case 93 | 20 | 34,996,040  | 36,063,565  | 3 | 2 | 5 | 0 |
| Case 93 | 20 | 36,067,873  | 36,527,215  | 4 | 1 | 5 | 0 |
| Case 93 | 20 | 36,529,578  | 37,194,041  | 3 | 2 | 5 | 0 |
| Case 93 | 20 | 37,195,334  | 37,667,148  | 4 | 1 | 5 | 0 |
| Case 93 | 20 | 37,667,182  | 39,391,369  | 4 | 2 | 6 | 0 |
| Case 93 | 20 | 39,393,556  | 39,397,698  | 2 | 1 | 3 | 0 |
| Case 93 | 20 | 39,398,172  | 39,994,193  | 4 | 1 | 5 | 0 |
| Case 93 | 20 | 39,998,520  | 42,552,869  | 4 | 2 | 6 | 0 |
| Case 93 | 20 | 42,553,241  | 42,553,437  | 2 | 1 | 3 | 0 |
| Case 93 | 20 | 42,553,993  | 42,559,531  | 4 | 1 | 5 | 0 |
| Case 93 | 20 | 42,562,360  | 43,572,217  | 3 | 2 | 5 | 0 |
| Case 93 | 20 | 43,578,485  | 44,076,496  | 4 | 1 | 5 | 0 |
| Case 93 | 20 | 44,076,549  | 44,395,240  | 4 | 2 | 6 | 0 |
| Case 93 | 20 | 44,395,664  | 45,476,128  | 4 | 1 | 5 | 0 |
| Case 93 | 20 | 45,476,574  | 54,768,476  | 4 | 2 | 6 | 0 |
| Case 93 | 20 | 54,774,117  | 54,774,117  | 2 | 1 | 3 | 0 |
| Case 93 | 20 | 54,775,903  | 55,108,617  | 4 | 1 | 5 | 0 |
| Case 93 | 20 | 55,109,304  | 57,544,274  | 4 | 2 | 6 | 0 |
| Case 93 | 20 | 57,545,765  | 57,545,765  | 2 | 1 | 3 | 0 |
| Case 93 | 20 | 57,554,923  | 57,566,637  | 4 | 1 | 5 | 0 |
| Case 93 | 20 | 57,566,946  | 59,274,805  | 3 | 2 | 5 | 0 |
| Case 93 | 20 | 59,275,813  | 61,386,238  | 4 | 1 | 5 | 0 |
| Case 93 | 20 | 61,387,404  | 61,714,591  | 3 | 2 | 5 | 0 |
| Case 93 | 20 | 61,718,322  | 62,948,788  | 4 | 1 | 5 | 0 |
| Case 93 | 21 | 10,827,533  | 10,971,337  | 2 | 1 | 3 | 0 |
| Case 93 | 21 | 14,368,320  | 48,100,155  | 2 | 1 | 3 | 0 |
| Case 93 | 22 | 16,114,244  | 30,640,214  | 2 | 1 | 3 | 0 |
| Case 93 | 22 | 30,640,308  | 30,951,503  | 2 | 0 | 2 | 1 |
| Case 93 | 22 | 30,951,644  | 31,485,923  | 3 | 0 | 3 | 1 |
| Case 93 | 22 | 31,485,994  | 51,195,728  | 2 | 1 | 3 | 0 |
| Case 94 | 1  | 82,154      | 11,952,406  | 4 | 1 | 5 | 0 |
| Case 94 | 1  | 11,957,639  | 25,178,310  | 2 | 1 | 3 | 0 |
| Case 94 | 1  | 25,185,786  | 25,295,580  | 3 | 1 | 4 | 0 |
| Case 94 | 1  | 25,297,184  | 121,346,616 | 2 | 1 | 3 | 0 |
| Case 94 | 1  | 142,649,718 | 144,879,497 | 2 | 1 | 3 | 0 |
| Case 94 | 1  | 144,880,834 | 161,012,448 | 2 | 2 | 4 | 0 |
| Case 94 | 1  | 161,012,760 | 161,182,208 | 2 | 1 | 3 | 0 |
| Case 94 | 1  | 161,182,672 | 185,157,131 | 2 | 2 | 4 | 0 |
| Case 94 | 1  | 185,171,869 | 192,682,671 | 2 | 1 | 3 | 0 |
| Case 94 | 1  | 192,696,582 | 214,776,395 | 2 | 2 | 4 | 0 |

|         |   |             |             |   |   |   |   |
|---------|---|-------------|-------------|---|---|---|---|
| Case 94 | 1 | 214,786,635 | 214,813,941 | 2 | 1 | 3 | 0 |
| Case 94 | 1 | 214,814,059 | 214,842,590 | 2 | 0 | 2 | 1 |
| Case 94 | 1 | 214,847,804 | 214,849,923 | 2 | 2 | 4 | 0 |
| Case 94 | 1 | 214,855,222 | 221,443,609 | 3 | 2 | 5 | 0 |
| Case 94 | 1 | 221,443,624 | 228,045,912 | 2 | 2 | 4 | 0 |
| Case 94 | 1 | 228,046,401 | 228,526,067 | 2 | 1 | 3 | 0 |
| Case 94 | 1 | 228,526,578 | 245,431,939 | 2 | 2 | 4 | 0 |
| Case 94 | 1 | 245,434,303 | 246,512,218 | 2 | 1 | 3 | 0 |
| Case 94 | 1 | 246,516,011 | 246,784,899 | 2 | 0 | 2 | 1 |
| Case 94 | 1 | 246,793,880 | 248,027,152 | 2 | 2 | 4 | 0 |
| Case 94 | 1 | 248,028,032 | 248,279,484 | 2 | 1 | 3 | 0 |
| Case 94 | 1 | 248,286,356 | 249,218,992 | 2 | 2 | 4 | 0 |
| Case 94 | 2 | 18,674      | 7,407,863   | 2 | 0 | 2 | 1 |
| Case 94 | 2 | 7,415,677   | 7,554,772   | 1 | 0 | 1 | 0 |
| Case 94 | 2 | 7,560,605   | 7,613,638   | 2 | 0 | 2 | 1 |
| Case 94 | 2 | 7,614,263   | 83,418,770  | 3 | 0 | 3 | 1 |
| Case 94 | 2 | 83,422,531  | 85,638,323  | 2 | 0 | 2 | 1 |
| Case 94 | 2 | 85,640,098  | 85,836,668  | 2 | 2 | 4 | 0 |
| Case 94 | 2 | 85,838,844  | 85,866,329  | 2 | 1 | 3 | 0 |
| Case 94 | 2 | 85,868,133  | 87,628,556  | 2 | 0 | 2 | 1 |
| Case 94 | 2 | 87,768,679  | 92,081,640  | 2 | 2 | 4 | 0 |
| Case 94 | 2 | 95,429,424  | 169,931,343 | 2 | 2 | 4 | 0 |
| Case 94 | 2 | 169,932,975 | 170,073,905 | 2 | 1 | 3 | 0 |
| Case 94 | 2 | 170,080,596 | 220,397,073 | 2 | 2 | 4 | 0 |
| Case 94 | 2 | 220,399,904 | 220,473,139 | 2 | 1 | 3 | 0 |
| Case 94 | 2 | 220,473,328 | 237,127,095 | 2 | 2 | 4 | 0 |
| Case 94 | 2 | 237,129,535 | 237,172,957 | 3 | 1 | 4 | 0 |
| Case 94 | 2 | 237,183,463 | 238,189,278 | 3 | 0 | 3 | 1 |
| Case 94 | 2 | 238,192,180 | 241,382,083 | 2 | 2 | 4 | 0 |
| Case 94 | 2 | 241,385,787 | 241,677,264 | 2 | 1 | 3 | 0 |
| Case 94 | 2 | 241,678,528 | 243,048,760 | 2 | 2 | 4 | 0 |
| Case 94 | 3 | 61,495      | 60,150,819  | 2 | 1 | 3 | 0 |
| Case 94 | 3 | 60,152,188  | 60,664,643  | 1 | 0 | 1 | 0 |
| Case 94 | 3 | 60,681,361  | 60,977,517  | 2 | 0 | 2 | 1 |
| Case 94 | 3 | 60,981,024  | 61,061,362  | 1 | 0 | 1 | 0 |
| Case 94 | 3 | 61,061,861  | 85,591,467  | 2 | 1 | 3 | 0 |
| Case 94 | 3 | 85,594,695  | 90,128,803  | 3 | 1 | 4 | 0 |
| Case 94 | 3 | 90,138,312  | 90,442,925  | 3 | 0 | 3 | 1 |
| Case 94 | 3 | 93,537,290  | 93,812,793  | 3 | 0 | 3 | 1 |
| Case 94 | 3 | 93,813,882  | 195,478,082 | 3 | 1 | 4 | 0 |
| Case 94 | 3 | 195,479,250 | 195,606,770 | 2 | 1 | 3 | 0 |
| Case 94 | 3 | 195,609,069 | 197,838,262 | 3 | 1 | 4 | 0 |
| Case 94 | 4 | 71,566      | 946,974     | 2 | 1 | 3 | 0 |
| Case 94 | 4 | 947,024     | 985,076     | 1 | 1 | 2 | 0 |
| Case 94 | 4 | 985,092     | 49,620,898  | 2 | 1 | 3 | 0 |
| Case 94 | 4 | 52,697,856  | 128,812,271 | 2 | 1 | 3 | 0 |
| Case 94 | 4 | 128,813,668 | 129,223,349 | 1 | 1 | 2 | 0 |
| Case 94 | 4 | 129,232,129 | 132,129,741 | 2 | 1 | 3 | 0 |
| Case 94 | 4 | 132,134,734 | 138,118,905 | 1 | 1 | 2 | 0 |
| Case 94 | 4 | 138,119,828 | 162,505,383 | 2 | 1 | 3 | 0 |
| Case 94 | 4 | 162,508,645 | 168,292,322 | 2 | 0 | 2 | 1 |
| Case 94 | 4 | 168,292,438 | 169,292,905 | 1 | 0 | 1 | 0 |
| Case 94 | 4 | 169,293,182 | 174,081,834 | 2 | 0 | 2 | 1 |
| Case 94 | 4 | 174,083,622 | 174,596,609 | 1 | 0 | 1 | 0 |
| Case 94 | 4 | 174,598,134 | 174,686,346 | 2 | 0 | 2 | 1 |
| Case 94 | 4 | 174,686,458 | 182,410,954 | 1 | 0 | 1 | 0 |
| Case 94 | 4 | 182,411,580 | 182,589,046 | 2 | 0 | 2 | 1 |
| Case 94 | 4 | 182,591,864 | 183,654,099 | 1 | 0 | 1 | 0 |
| Case 94 | 4 | 183,655,548 | 184,190,300 | 2 | 0 | 2 | 1 |
| Case 94 | 4 | 184,192,037 | 184,252,789 | 1 | 0 | 1 | 0 |
| Case 94 | 4 | 184,259,614 | 184,335,306 | 2 | 0 | 2 | 1 |

|         |   |             |             |   |   |   |   |
|---------|---|-------------|-------------|---|---|---|---|
| Case 94 | 4 | 184,338,589 | 184,721,809 | 1 | 0 | 1 | 0 |
| Case 94 | 4 | 184,725,906 | 185,222,701 | 2 | 0 | 2 | 1 |
| Case 94 | 4 | 185,226,573 | 185,286,768 | 1 | 0 | 1 | 0 |
| Case 94 | 4 | 185,287,351 | 185,440,669 | 2 | 0 | 2 | 1 |
| Case 94 | 4 | 185,449,260 | 185,801,346 | 1 | 0 | 1 | 0 |
| Case 94 | 4 | 185,801,567 | 186,231,836 | 2 | 0 | 2 | 1 |
| Case 94 | 4 | 186,241,915 | 186,381,043 | 1 | 0 | 1 | 0 |
| Case 94 | 4 | 186,381,115 | 186,692,629 | 2 | 0 | 2 | 1 |
| Case 94 | 4 | 186,694,576 | 187,059,563 | 1 | 0 | 1 | 0 |
| Case 94 | 4 | 187,059,719 | 187,212,134 | 2 | 0 | 2 | 1 |
| Case 94 | 4 | 187,213,027 | 187,264,414 | 1 | 0 | 1 | 0 |
| Case 94 | 4 | 187,271,047 | 188,127,832 | 2 | 0 | 2 | 1 |
| Case 94 | 4 | 188,131,680 | 188,899,298 | 1 | 0 | 1 | 0 |
| Case 94 | 4 | 188,904,235 | 189,262,246 | 2 | 0 | 2 | 1 |
| Case 94 | 4 | 189,265,168 | 190,838,050 | 1 | 0 | 1 | 0 |
| Case 94 | 4 | 190,862,083 | 190,963,766 | 2 | 0 | 2 | 1 |
| Case 94 | 5 | 38,139      | 309,060     | 3 | 0 | 3 | 1 |
| Case 94 | 5 | 309,096     | 411,361     | 4 | 0 | 4 | 1 |
| Case 94 | 5 | 412,694     | 884,251     | 3 | 0 | 3 | 1 |
| Case 94 | 5 | 884,439     | 5,447,607   | 4 | 0 | 4 | 1 |
| Case 94 | 5 | 5,449,333   | 5,496,203   | 3 | 0 | 3 | 1 |
| Case 94 | 5 | 5,496,480   | 45,925,213  | 4 | 0 | 4 | 1 |
| Case 94 | 5 | 45,983,680  | 46,399,093  | 2 | 0 | 2 | 1 |
| Case 94 | 5 | 49,457,282  | 55,568,487  | 2 | 0 | 2 | 1 |
| Case 94 | 5 | 55,574,191  | 56,100,996  | 3 | 0 | 3 | 1 |
| Case 94 | 5 | 56,109,154  | 60,937,964  | 2 | 0 | 2 | 1 |
| Case 94 | 5 | 60,938,249  | 61,553,881  | 3 | 0 | 3 | 1 |
| Case 94 | 5 | 61,556,730  | 67,288,272  | 2 | 0 | 2 | 1 |
| Case 94 | 5 | 67,290,972  | 68,332,072  | 3 | 0 | 3 | 1 |
| Case 94 | 5 | 68,335,741  | 70,889,870  | 2 | 0 | 2 | 1 |
| Case 94 | 5 | 70,895,499  | 71,402,339  | 3 | 0 | 3 | 1 |
| Case 94 | 5 | 71,403,533  | 72,460,126  | 2 | 0 | 2 | 1 |
| Case 94 | 5 | 72,460,195  | 73,992,406  | 3 | 0 | 3 | 1 |
| Case 94 | 5 | 73,992,545  | 77,809,989  | 2 | 0 | 2 | 1 |
| Case 94 | 5 | 77,812,321  | 78,135,201  | 3 | 0 | 3 | 1 |
| Case 94 | 5 | 78,135,214  | 90,208,481  | 2 | 0 | 2 | 1 |
| Case 94 | 5 | 90,209,824  | 90,838,345  | 3 | 0 | 3 | 1 |
| Case 94 | 5 | 90,858,258  | 95,407,719  | 2 | 0 | 2 | 1 |
| Case 94 | 5 | 95,407,894  | 96,058,392  | 3 | 0 | 3 | 1 |
| Case 94 | 5 | 96,064,890  | 103,767,504 | 2 | 0 | 2 | 1 |
| Case 94 | 5 | 103,771,206 | 104,515,164 | 1 | 0 | 1 | 0 |
| Case 94 | 5 | 104,524,071 | 114,693,074 | 2 | 0 | 2 | 1 |
| Case 94 | 5 | 114,700,699 | 115,285,650 | 3 | 0 | 3 | 1 |
| Case 94 | 5 | 115,291,291 | 116,421,862 | 2 | 0 | 2 | 1 |
| Case 94 | 5 | 116,423,771 | 118,974,922 | 1 | 0 | 1 | 0 |
| Case 94 | 5 | 118,977,870 | 119,526,332 | 2 | 0 | 2 | 1 |
| Case 94 | 5 | 119,526,884 | 121,429,808 | 1 | 0 | 1 | 0 |
| Case 94 | 5 | 121,452,158 | 121,826,941 | 2 | 0 | 2 | 1 |
| Case 94 | 5 | 121,829,635 | 122,365,046 | 1 | 0 | 1 | 0 |
| Case 94 | 5 | 122,367,347 | 122,729,025 | 2 | 0 | 2 | 1 |
| Case 94 | 5 | 122,744,178 | 123,731,118 | 1 | 0 | 1 | 0 |
| Case 94 | 5 | 123,731,454 | 124,154,976 | 2 | 0 | 2 | 1 |
| Case 94 | 5 | 124,157,377 | 125,340,731 | 1 | 0 | 1 | 0 |
| Case 94 | 5 | 125,342,128 | 126,835,863 | 2 | 0 | 2 | 1 |
| Case 94 | 5 | 126,838,742 | 127,557,814 | 1 | 0 | 1 | 0 |
| Case 94 | 5 | 127,562,880 | 127,694,805 | 2 | 0 | 2 | 1 |
| Case 94 | 5 | 127,699,375 | 128,198,862 | 1 | 0 | 1 | 0 |
| Case 94 | 5 | 128,200,502 | 128,323,346 | 2 | 0 | 2 | 1 |
| Case 94 | 5 | 128,323,644 | 131,075,921 | 1 | 0 | 1 | 0 |
| Case 94 | 5 | 131,107,692 | 131,294,966 | 2 | 0 | 2 | 1 |
| Case 94 | 5 | 131,296,236 | 131,704,980 | 3 | 0 | 3 | 1 |

|         |   |             |             |   |   |   |   |
|---------|---|-------------|-------------|---|---|---|---|
| Case 94 | 5 | 131,705,627 | 132,161,784 | 2 | 0 | 2 | 1 |
| Case 94 | 5 | 132,163,969 | 132,758,353 | 3 | 0 | 3 | 1 |
| Case 94 | 5 | 132,761,691 | 134,385,234 | 2 | 0 | 2 | 1 |
| Case 94 | 5 | 134,390,581 | 134,629,551 | 3 | 0 | 3 | 1 |
| Case 94 | 5 | 134,633,657 | 135,276,701 | 2 | 0 | 2 | 1 |
| Case 94 | 5 | 135,276,738 | 139,931,384 | 3 | 0 | 3 | 1 |
| Case 94 | 5 | 139,931,607 | 139,931,740 | 0 | 0 | 0 | 0 |
| Case 94 | 5 | 139,936,760 | 174,910,713 | 3 | 0 | 3 | 1 |
| Case 94 | 5 | 174,911,675 | 175,329,033 | 2 | 0 | 2 | 1 |
| Case 94 | 5 | 175,346,223 | 180,693,127 | 3 | 0 | 3 | 1 |
| Case 94 | 6 | 108,666     | 26,017,510  | 4 | 0 | 4 | 1 |
| Case 94 | 6 | 26,017,542  | 26,087,736  | 3 | 0 | 3 | 1 |
| Case 94 | 6 | 26,088,890  | 29,913,727  | 4 | 0 | 4 | 1 |
| Case 94 | 6 | 29,914,270  | 29,944,148  | 3 | 0 | 3 | 1 |
| Case 94 | 6 | 29,944,158  | 31,996,614  | 4 | 0 | 4 | 1 |
| Case 94 | 6 | 32,005,904  | 32,161,324  | 3 | 0 | 3 | 1 |
| Case 94 | 6 | 32,161,396  | 42,833,003  | 4 | 0 | 4 | 1 |
| Case 94 | 6 | 42,834,021  | 42,946,386  | 3 | 0 | 3 | 1 |
| Case 94 | 6 | 42,954,429  | 58,752,089  | 4 | 0 | 4 | 1 |
| Case 94 | 6 | 61,891,118  | 92,822,870  | 3 | 0 | 3 | 1 |
| Case 94 | 6 | 92,823,967  | 92,999,553  | 2 | 0 | 2 | 1 |
| Case 94 | 6 | 93,005,995  | 128,740,387 | 3 | 0 | 3 | 1 |
| Case 94 | 6 | 128,741,476 | 129,003,449 | 4 | 0 | 4 | 1 |
| Case 94 | 6 | 129,009,593 | 147,767,235 | 3 | 0 | 3 | 1 |
| Case 94 | 6 | 147,780,366 | 147,908,995 | 4 | 0 | 4 | 1 |
| Case 94 | 6 | 147,910,426 | 147,994,707 | 2 | 0 | 2 | 1 |
| Case 94 | 6 | 148,002,142 | 165,377,997 | 3 | 0 | 3 | 1 |
| Case 94 | 6 | 165,381,837 | 165,560,336 | 2 | 0 | 2 | 1 |
| Case 94 | 6 | 165,564,573 | 168,506,075 | 3 | 0 | 3 | 1 |
| Case 94 | 6 | 168,511,016 | 169,904,414 | 4 | 0 | 4 | 1 |
| Case 94 | 6 | 169,912,559 | 170,333,717 | 3 | 0 | 3 | 1 |
| Case 94 | 6 | 170,334,114 | 170,980,171 | 4 | 0 | 4 | 1 |
| Case 94 | 7 | 44,935      | 5,908,742   | 2 | 0 | 2 | 1 |
| Case 94 | 7 | 5,911,291   | 6,189,472   | 3 | 0 | 3 | 1 |
| Case 94 | 7 | 6,189,780   | 8,156,375   | 2 | 0 | 2 | 1 |
| Case 94 | 7 | 8,159,569   | 8,639,507   | 3 | 0 | 3 | 1 |
| Case 94 | 7 | 8,641,237   | 16,667,920  | 2 | 0 | 2 | 1 |
| Case 94 | 7 | 16,670,471  | 16,886,936  | 3 | 0 | 3 | 1 |
| Case 94 | 7 | 16,886,964  | 17,478,458  | 2 | 0 | 2 | 1 |
| Case 94 | 7 | 17,478,578  | 17,794,682  | 3 | 0 | 3 | 1 |
| Case 94 | 7 | 17,796,008  | 21,934,511  | 2 | 0 | 2 | 1 |
| Case 94 | 7 | 21,935,986  | 22,800,653  | 3 | 0 | 3 | 1 |
| Case 94 | 7 | 22,802,407  | 24,051,036  | 2 | 0 | 2 | 1 |
| Case 94 | 7 | 24,052,443  | 24,280,534  | 3 | 0 | 3 | 1 |
| Case 94 | 7 | 24,282,334  | 25,094,095  | 2 | 0 | 2 | 1 |
| Case 94 | 7 | 25,094,305  | 25,856,295  | 3 | 0 | 3 | 1 |
| Case 94 | 7 | 25,861,138  | 26,224,894  | 2 | 0 | 2 | 1 |
| Case 94 | 7 | 26,224,925  | 26,685,929  | 3 | 0 | 3 | 1 |
| Case 94 | 7 | 26,688,808  | 29,160,604  | 2 | 0 | 2 | 1 |
| Case 94 | 7 | 29,160,613  | 29,605,481  | 3 | 0 | 3 | 1 |
| Case 94 | 7 | 29,606,160  | 29,963,247  | 2 | 0 | 2 | 1 |
| Case 94 | 7 | 29,966,085  | 30,491,267  | 3 | 0 | 3 | 1 |
| Case 94 | 7 | 30,491,310  | 30,796,530  | 2 | 0 | 2 | 1 |
| Case 94 | 7 | 30,800,679  | 31,877,261  | 3 | 0 | 3 | 1 |
| Case 94 | 7 | 31,877,485  | 33,352,352  | 2 | 0 | 2 | 1 |
| Case 94 | 7 | 33,354,325  | 34,696,545  | 3 | 0 | 3 | 1 |
| Case 94 | 7 | 34,697,060  | 35,729,609  | 2 | 0 | 2 | 1 |
| Case 94 | 7 | 35,730,645  | 36,201,102  | 3 | 0 | 3 | 1 |
| Case 94 | 7 | 36,203,128  | 38,292,663  | 2 | 0 | 2 | 1 |
| Case 94 | 7 | 38,297,145  | 38,361,999  | 3 | 0 | 3 | 1 |
| Case 94 | 7 | 38,362,957  | 44,146,151  | 2 | 0 | 2 | 1 |

|         |   |             |             |   |   |   |   |
|---------|---|-------------|-------------|---|---|---|---|
| Case 94 | 7 | 44,146,451  | 44,259,224  | 3 | 0 | 3 | 1 |
| Case 94 | 7 | 44,259,762  | 47,408,550  | 2 | 0 | 2 | 1 |
| Case 94 | 7 | 47,408,702  | 47,777,685  | 3 | 0 | 3 | 1 |
| Case 94 | 7 | 47,778,326  | 50,289,657  | 2 | 0 | 2 | 1 |
| Case 94 | 7 | 50,294,856  | 50,742,180  | 3 | 0 | 3 | 1 |
| Case 94 | 7 | 50,742,212  | 51,111,403  | 2 | 0 | 2 | 1 |
| Case 94 | 7 | 51,121,341  | 51,798,888  | 3 | 0 | 3 | 1 |
| Case 94 | 7 | 51,803,145  | 54,311,822  | 2 | 0 | 2 | 1 |
| Case 94 | 7 | 54,313,171  | 56,558,468  | 2 | 1 | 3 | 0 |
| Case 94 | 7 | 56,563,273  | 58,019,061  | 2 | 0 | 2 | 1 |
| Case 94 | 7 | 61,056,053  | 62,393,418  | 2 | 0 | 2 | 1 |
| Case 94 | 7 | 62,397,642  | 99,703,901  | 3 | 1 | 4 | 0 |
| Case 94 | 7 | 99,703,958  | 100,366,308 | 2 | 1 | 3 | 0 |
| Case 94 | 7 | 100,367,558 | 100,532,733 | 3 | 1 | 4 | 0 |
| Case 94 | 7 | 100,537,743 | 100,537,743 | 3 | 0 | 3 | 1 |
| Case 94 | 7 | 100,542,445 | 100,775,276 | 2 | 1 | 3 | 0 |
| Case 94 | 7 | 100,775,300 | 101,159,913 | 3 | 1 | 4 | 0 |
| Case 94 | 7 | 101,161,537 | 102,334,106 | 2 | 1 | 3 | 0 |
| Case 94 | 7 | 102,375,663 | 106,548,353 | 3 | 1 | 4 | 0 |
| Case 94 | 7 | 106,549,902 | 110,329,655 | 2 | 1 | 3 | 0 |
| Case 94 | 7 | 110,338,460 | 110,590,834 | 1 | 1 | 2 | 0 |
| Case 94 | 7 | 110,591,124 | 110,661,337 | 2 | 1 | 3 | 0 |
| Case 94 | 7 | 110,665,997 | 110,737,149 | 1 | 0 | 1 | 0 |
| Case 94 | 7 | 110,742,454 | 110,899,634 | 2 | 0 | 2 | 1 |
| Case 94 | 7 | 110,909,052 | 149,512,331 | 2 | 1 | 3 | 0 |
| Case 94 | 7 | 149,512,674 | 149,526,070 | 1 | 1 | 2 | 0 |
| Case 94 | 7 | 149,528,255 | 159,119,486 | 2 | 1 | 3 | 0 |
| Case 94 | 8 | 164,984     | 3,511,972   | 2 | 0 | 2 | 1 |
| Case 94 | 8 | 3,512,299   | 3,564,741   | 3 | 0 | 3 | 1 |
| Case 94 | 8 | 3,565,900   | 6,572,165   | 2 | 0 | 2 | 1 |
| Case 94 | 8 | 6,575,683   | 6,900,438   | 3 | 0 | 3 | 1 |
| Case 94 | 8 | 6,903,607   | 8,651,879   | 2 | 0 | 2 | 1 |
| Case 94 | 8 | 8,652,504   | 9,351,983   | 3 | 0 | 3 | 1 |
| Case 94 | 8 | 9,357,874   | 9,710,822   | 2 | 0 | 2 | 1 |
| Case 94 | 8 | 9,711,456   | 10,119,523  | 3 | 0 | 3 | 1 |
| Case 94 | 8 | 10,121,022  | 10,210,451  | 2 | 0 | 2 | 1 |
| Case 94 | 8 | 10,225,159  | 10,300,132  | 3 | 0 | 3 | 1 |
| Case 94 | 8 | 10,301,469  | 11,306,805  | 2 | 0 | 2 | 1 |
| Case 94 | 8 | 11,309,893  | 11,695,970  | 3 | 0 | 3 | 1 |
| Case 94 | 8 | 11,696,115  | 17,182,541  | 2 | 0 | 2 | 1 |
| Case 94 | 8 | 17,182,965  | 17,724,142  | 3 | 0 | 3 | 1 |
| Case 94 | 8 | 17,724,658  | 17,889,343  | 2 | 0 | 2 | 1 |
| Case 94 | 8 | 17,891,869  | 17,957,107  | 3 | 0 | 3 | 1 |
| Case 94 | 8 | 17,958,628  | 18,831,269  | 2 | 0 | 2 | 1 |
| Case 94 | 8 | 18,836,545  | 19,018,974  | 3 | 0 | 3 | 1 |
| Case 94 | 8 | 19,019,943  | 21,409,341  | 2 | 0 | 2 | 1 |
| Case 94 | 8 | 21,416,030  | 21,960,096  | 3 | 0 | 3 | 1 |
| Case 94 | 8 | 21,961,834  | 22,967,438  | 2 | 0 | 2 | 1 |
| Case 94 | 8 | 22,968,219  | 23,469,088  | 3 | 0 | 3 | 1 |
| Case 94 | 8 | 23,470,246  | 24,109,055  | 2 | 0 | 2 | 1 |
| Case 94 | 8 | 24,110,439  | 25,326,140  | 3 | 0 | 3 | 1 |
| Case 94 | 8 | 25,327,421  | 26,434,014  | 2 | 0 | 2 | 1 |
| Case 94 | 8 | 26,438,546  | 27,151,632  | 3 | 0 | 3 | 1 |
| Case 94 | 8 | 27,151,698  | 28,935,001  | 2 | 0 | 2 | 1 |
| Case 94 | 8 | 28,935,457  | 29,551,058  | 3 | 0 | 3 | 1 |
| Case 94 | 8 | 29,552,383  | 36,869,192  | 2 | 0 | 2 | 1 |
| Case 94 | 8 | 36,872,094  | 37,667,471  | 3 | 0 | 3 | 1 |
| Case 94 | 8 | 37,671,140  | 37,790,205  | 2 | 0 | 2 | 1 |
| Case 94 | 8 | 37,791,109  | 38,317,398  | 3 | 0 | 3 | 1 |
| Case 94 | 8 | 38,319,349  | 39,816,468  | 2 | 0 | 2 | 1 |
| Case 94 | 8 | 39,821,037  | 40,184,872  | 3 | 0 | 3 | 1 |

|         |   |             |             |   |   |   |   |
|---------|---|-------------|-------------|---|---|---|---|
| Case 94 | 8 | 40,185,591  | 43,791,691  | 2 | 0 | 2 | 1 |
| Case 94 | 8 | 46,886,735  | 62,172,668  | 2 | 0 | 2 | 1 |
| Case 94 | 8 | 62,173,034  | 62,901,250  | 3 | 0 | 3 | 1 |
| Case 94 | 8 | 62,914,580  | 94,128,797  | 2 | 0 | 2 | 1 |
| Case 94 | 8 | 94,134,191  | 105,229,023 | 5 | 0 | 5 | 1 |
| Case 94 | 8 | 105,232,453 | 106,297,815 | 4 | 0 | 4 | 1 |
| Case 94 | 8 | 106,299,441 | 108,279,912 | 5 | 0 | 5 | 1 |
| Case 94 | 8 | 108,287,577 | 108,543,427 | 4 | 0 | 4 | 1 |
| Case 94 | 8 | 108,543,767 | 110,372,477 | 5 | 0 | 5 | 1 |
| Case 94 | 8 | 110,376,861 | 110,535,547 | 4 | 0 | 4 | 1 |
| Case 94 | 8 | 110,535,565 | 111,498,521 | 5 | 0 | 5 | 1 |
| Case 94 | 8 | 111,509,813 | 112,548,351 | 4 | 0 | 4 | 1 |
| Case 94 | 8 | 112,552,852 | 114,440,178 | 5 | 0 | 5 | 1 |
| Case 94 | 8 | 114,445,055 | 115,060,120 | 4 | 0 | 4 | 1 |
| Case 94 | 8 | 115,063,598 | 116,594,538 | 5 | 0 | 5 | 1 |
| Case 94 | 8 | 116,599,199 | 117,394,185 | 4 | 0 | 4 | 1 |
| Case 94 | 8 | 117,410,485 | 118,276,821 | 5 | 0 | 5 | 1 |
| Case 94 | 8 | 118,284,380 | 118,538,896 | 6 | 0 | 6 | 1 |
| Case 94 | 8 | 118,542,735 | 119,192,723 | 5 | 0 | 5 | 1 |
| Case 94 | 8 | 119,192,998 | 120,224,806 | 6 | 0 | 6 | 1 |
| Case 94 | 8 | 120,229,785 | 126,154,649 | 5 | 0 | 5 | 1 |
| Case 94 | 8 | 126,156,243 | 127,560,353 | 6 | 0 | 6 | 1 |
| Case 94 | 8 | 127,564,109 | 130,987,888 | 5 | 0 | 5 | 1 |
| Case 94 | 8 | 130,990,662 | 131,359,644 | 6 | 0 | 6 | 1 |
| Case 94 | 8 | 131,370,285 | 131,623,388 | 5 | 0 | 5 | 1 |
| Case 94 | 8 | 131,627,539 | 131,781,235 | 6 | 0 | 6 | 1 |
| Case 94 | 8 | 131,792,219 | 132,165,751 | 5 | 0 | 5 | 1 |
| Case 94 | 8 | 132,167,864 | 132,620,699 | 6 | 0 | 6 | 1 |
| Case 94 | 8 | 132,620,944 | 134,256,559 | 5 | 0 | 5 | 1 |
| Case 94 | 8 | 134,257,450 | 134,401,509 | 4 | 0 | 4 | 1 |
| Case 94 | 8 | 134,402,395 | 137,211,259 | 5 | 0 | 5 | 1 |
| Case 94 | 8 | 137,218,971 | 138,018,565 | 6 | 0 | 6 | 1 |
| Case 94 | 8 | 138,018,770 | 138,414,687 | 5 | 0 | 5 | 1 |
| Case 94 | 8 | 138,420,975 | 138,744,981 | 6 | 0 | 6 | 1 |
| Case 94 | 8 | 138,746,389 | 140,694,111 | 5 | 0 | 5 | 1 |
| Case 94 | 8 | 140,695,375 | 144,642,054 | 4 | 0 | 4 | 1 |
| Case 94 | 8 | 144,643,206 | 144,690,886 | 3 | 0 | 3 | 1 |
| Case 94 | 8 | 144,692,333 | 144,943,745 | 4 | 0 | 4 | 1 |
| Case 94 | 8 | 144,943,784 | 145,155,408 | 3 | 0 | 3 | 1 |
| Case 94 | 8 | 145,158,091 | 145,641,588 | 4 | 0 | 4 | 1 |
| Case 94 | 8 | 145,642,002 | 145,736,389 | 3 | 0 | 3 | 1 |
| Case 94 | 8 | 145,736,440 | 146,293,414 | 4 | 0 | 4 | 1 |
| Case 94 | 9 | 46,587      | 78,775      | 6 | 0 | 6 | 1 |
| Case 94 | 9 | 185,632     | 248,749     | 7 | 0 | 7 | 1 |
| Case 94 | 9 | 249,281     | 1,207,469   | 6 | 0 | 6 | 1 |
| Case 94 | 9 | 1,209,190   | 1,711,307   | 7 | 0 | 7 | 1 |
| Case 94 | 9 | 1,712,303   | 2,320,311   | 6 | 0 | 6 | 1 |
| Case 94 | 9 | 2,321,242   | 2,633,562   | 7 | 0 | 7 | 1 |
| Case 94 | 9 | 2,633,921   | 2,746,548   | 6 | 0 | 6 | 1 |
| Case 94 | 9 | 2,746,594   | 5,291,710   | 7 | 0 | 7 | 1 |
| Case 94 | 9 | 5,292,257   | 5,335,570   | 0 | 0 | 0 | 0 |
| Case 94 | 9 | 5,339,657   | 5,356,333   | 7 | 0 | 7 | 1 |
| Case 94 | 9 | 5,356,674   | 5,465,130   | 0 | 0 | 0 | 0 |
| Case 94 | 9 | 5,465,262   | 10,381,819  | 7 | 0 | 7 | 1 |
| Case 94 | 9 | 10,386,641  | 12,493,565  | 3 | 0 | 3 | 1 |
| Case 94 | 9 | 12,494,501  | 13,106,335  | 4 | 0 | 4 | 1 |
| Case 94 | 9 | 13,106,598  | 14,205,169  | 3 | 0 | 3 | 1 |
| Case 94 | 9 | 14,206,835  | 14,316,570  | 4 | 0 | 4 | 1 |
| Case 94 | 9 | 14,323,346  | 14,479,228  | 3 | 0 | 3 | 1 |
| Case 94 | 9 | 14,479,361  | 14,801,710  | 4 | 0 | 4 | 1 |
| Case 94 | 9 | 14,801,713  | 14,901,322  | 3 | 0 | 3 | 1 |



|         |    |             |             |   |   |   |   |
|---------|----|-------------|-------------|---|---|---|---|
| Case 94 | 9  | 14,903,275  | 15,084,766  | 4 | 0 | 4 | 1 |
| Case 94 | 9  | 15,085,778  | 18,294,429  | 3 | 0 | 3 | 1 |
| Case 94 | 9  | 18,295,768  | 18,494,532  | 4 | 0 | 4 | 1 |
| Case 94 | 9  | 18,495,515  | 20,336,146  | 3 | 0 | 3 | 1 |
| Case 94 | 9  | 20,337,131  | 20,781,868  | 4 | 0 | 4 | 1 |
| Case 94 | 9  | 20,782,100  | 32,572,983  | 3 | 0 | 3 | 1 |
| Case 94 | 9  | 32,586,822  | 33,134,617  | 4 | 0 | 4 | 1 |
| Case 94 | 9  | 33,135,318  | 46,944,322  | 3 | 0 | 3 | 1 |
| Case 94 | 9  | 65,629,772  | 75,515,546  | 3 | 0 | 3 | 1 |
| Case 94 | 9  | 75,515,669  | 75,900,508  | 4 | 0 | 4 | 1 |
| Case 94 | 9  | 75,905,148  | 87,193,728  | 3 | 0 | 3 | 1 |
| Case 94 | 9  | 87,200,556  | 87,595,734  | 4 | 0 | 4 | 1 |
| Case 94 | 9  | 87,600,078  | 110,645,412 | 3 | 0 | 3 | 1 |
| Case 94 | 9  | 110,646,522 | 111,128,013 | 4 | 0 | 4 | 1 |
| Case 94 | 9  | 111,130,749 | 113,367,300 | 3 | 0 | 3 | 1 |
| Case 94 | 9  | 113,368,085 | 113,636,353 | 4 | 0 | 4 | 1 |
| Case 94 | 9  | 113,637,662 | 126,268,302 | 3 | 0 | 3 | 1 |
| Case 94 | 9  | 126,272,182 | 126,881,448 | 4 | 0 | 4 | 1 |
| Case 94 | 9  | 126,885,146 | 134,621,332 | 3 | 0 | 3 | 1 |
| Case 94 | 9  | 134,621,809 | 134,677,332 | 4 | 0 | 4 | 1 |
| Case 94 | 9  | 134,678,778 | 141,066,491 | 3 | 0 | 3 | 1 |
| Case 94 | 10 | 98,087      | 7,213,014   | 3 | 1 | 4 | 0 |
| Case 94 | 10 | 7,214,505   | 7,989,049   | 2 | 1 | 3 | 0 |
| Case 94 | 10 | 8,002,270   | 16,997,827  | 3 | 1 | 4 | 0 |
| Case 94 | 10 | 16,997,891  | 17,341,721  | 2 | 1 | 3 | 0 |
| Case 94 | 10 | 17,342,489  | 19,719,841  | 3 | 1 | 4 | 0 |
| Case 94 | 10 | 19,721,013  | 20,518,371  | 2 | 1 | 3 | 0 |
| Case 94 | 10 | 20,521,825  | 23,393,150  | 3 | 1 | 4 | 0 |
| Case 94 | 10 | 23,393,172  | 24,055,066  | 2 | 1 | 3 | 0 |
| Case 94 | 10 | 24,056,662  | 26,119,919  | 3 | 1 | 4 | 0 |
| Case 94 | 10 | 26,122,732  | 26,446,312  | 2 | 1 | 3 | 0 |
| Case 94 | 10 | 26,452,144  | 36,793,742  | 3 | 1 | 4 | 0 |
| Case 94 | 10 | 36,800,702  | 37,274,522  | 2 | 1 | 3 | 0 |
| Case 94 | 10 | 37,278,930  | 37,843,457  | 3 | 1 | 4 | 0 |
| Case 94 | 10 | 37,846,835  | 39,070,516  | 2 | 1 | 3 | 0 |
| Case 94 | 10 | 39,088,829  | 39,097,912  | 2 | 0 | 2 | 1 |
| Case 94 | 10 | 42,436,301  | 42,905,510  | 2 | 0 | 2 | 1 |
| Case 94 | 10 | 42,907,201  | 55,080,874  | 3 | 0 | 3 | 1 |
| Case 94 | 10 | 55,081,279  | 55,233,567  | 2 | 0 | 2 | 1 |
| Case 94 | 10 | 55,233,826  | 57,135,857  | 3 | 0 | 3 | 1 |
| Case 94 | 10 | 57,138,742  | 57,395,075  | 2 | 0 | 2 | 1 |
| Case 94 | 10 | 57,396,751  | 58,355,186  | 3 | 0 | 3 | 1 |
| Case 94 | 10 | 58,365,415  | 58,739,433  | 2 | 0 | 2 | 1 |
| Case 94 | 10 | 58,742,985  | 58,892,275  | 3 | 0 | 3 | 1 |
| Case 94 | 10 | 58,904,859  | 58,936,939  | 0 | 0 | 0 | 0 |
| Case 94 | 10 | 58,937,708  | 75,477,298  | 3 | 0 | 3 | 1 |
| Case 94 | 10 | 75,490,217  | 75,708,906  | 4 | 0 | 4 | 1 |
| Case 94 | 10 | 75,727,098  | 76,092,691  | 3 | 0 | 3 | 1 |
| Case 94 | 10 | 76,131,244  | 76,437,114  | 4 | 0 | 4 | 1 |
| Case 94 | 10 | 76,449,813  | 76,688,082  | 3 | 0 | 3 | 1 |
| Case 94 | 10 | 76,705,881  | 76,867,879  | 4 | 0 | 4 | 1 |
| Case 94 | 10 | 76,867,899  | 78,772,456  | 3 | 0 | 3 | 1 |
| Case 94 | 10 | 78,774,252  | 78,987,183  | 5 | 0 | 5 | 1 |
| Case 94 | 10 | 78,988,848  | 79,269,731  | 3 | 0 | 3 | 1 |
| Case 94 | 10 | 79,274,098  | 79,704,394  | 5 | 0 | 5 | 1 |
| Case 94 | 10 | 79,713,315  | 80,717,362  | 3 | 0 | 3 | 1 |
| Case 94 | 10 | 80,729,631  | 80,797,958  | 7 | 0 | 7 | 1 |
| Case 94 | 10 | 80,798,763  | 81,195,310  | 4 | 0 | 4 | 1 |
| Case 94 | 10 | 81,197,177  | 84,835,295  | 3 | 0 | 3 | 1 |
| Case 94 | 10 | 84,836,280  | 85,276,201  | 2 | 0 | 2 | 1 |
| Case 94 | 10 | 85,296,654  | 86,088,078  | 3 | 0 | 3 | 1 |

|         |    |             |             |   |   |   |   |
|---------|----|-------------|-------------|---|---|---|---|
| Case 94 | 10 | 86,093,951  | 86,199,507  | 2 | 0 | 2 | 1 |
| Case 94 | 10 | 86,206,701  | 99,329,418  | 3 | 0 | 3 | 1 |
| Case 94 | 10 | 99,330,035  | 99,371,376  | 2 | 0 | 2 | 1 |
| Case 94 | 10 | 99,371,729  | 120,976,553 | 3 | 0 | 3 | 1 |
| Case 94 | 10 | 120,978,183 | 121,323,204 | 4 | 0 | 4 | 1 |
| Case 94 | 10 | 121,328,009 | 122,301,705 | 3 | 0 | 3 | 1 |
| Case 94 | 10 | 122,302,038 | 122,365,160 | 4 | 0 | 4 | 1 |
| Case 94 | 10 | 122,367,961 | 122,383,804 | 3 | 0 | 3 | 1 |
| Case 94 | 10 | 122,385,035 | 122,485,809 | 0 | 0 | 0 | 0 |
| Case 94 | 10 | 122,489,318 | 122,508,325 | 7 | 0 | 7 | 1 |
| Case 94 | 10 | 122,508,540 | 122,639,170 | 0 | 0 | 0 | 0 |
| Case 94 | 10 | 122,645,404 | 122,771,836 | 7 | 0 | 7 | 1 |
| Case 94 | 10 | 122,777,014 | 122,888,555 | 0 | 0 | 0 | 0 |
| Case 94 | 10 | 122,889,466 | 123,094,861 | 7 | 0 | 7 | 1 |
| Case 94 | 10 | 123,094,884 | 123,268,889 | 0 | 0 | 0 | 0 |
| Case 94 | 10 | 123,272,296 | 123,325,158 | 7 | 0 | 7 | 1 |
| Case 94 | 10 | 123,325,538 | 123,421,024 | 0 | 0 | 0 | 0 |
| Case 94 | 10 | 123,422,434 | 123,501,732 | 7 | 0 | 7 | 1 |
| Case 94 | 10 | 123,501,836 | 126,097,420 | 3 | 0 | 3 | 1 |
| Case 94 | 10 | 126,100,523 | 126,414,452 | 5 | 0 | 5 | 1 |
| Case 94 | 10 | 126,418,782 | 126,695,847 | 6 | 0 | 6 | 1 |
| Case 94 | 10 | 126,696,061 | 126,764,413 | 5 | 0 | 5 | 1 |
| Case 94 | 10 | 126,773,746 | 127,569,348 | 3 | 0 | 3 | 1 |
| Case 94 | 10 | 127,626,702 | 127,686,001 | 4 | 0 | 4 | 1 |
| Case 94 | 10 | 127,689,040 | 133,083,894 | 3 | 0 | 3 | 1 |
| Case 94 | 10 | 133,084,992 | 133,373,941 | 4 | 0 | 4 | 1 |
| Case 94 | 10 | 133,374,747 | 135,477,883 | 3 | 0 | 3 | 1 |
| Case 94 | 11 | 193,146     | 212,479     | 3 | 0 | 3 | 1 |
| Case 94 | 11 | 212,839     | 1,015,021   | 2 | 0 | 2 | 1 |
| Case 94 | 11 | 1,015,786   | 1,019,413   | 3 | 0 | 3 | 1 |
| Case 94 | 11 | 1,020,722   | 2,691,500   | 2 | 0 | 2 | 1 |
| Case 94 | 11 | 2,694,606   | 50,237,640  | 2 | 2 | 4 | 0 |
| Case 94 | 11 | 50,238,588  | 51,591,253  | 2 | 1 | 3 | 0 |
| Case 94 | 11 | 54,794,237  | 55,362,955  | 2 | 1 | 3 | 0 |
| Case 94 | 11 | 55,370,325  | 55,427,700  | 1 | 0 | 1 | 0 |
| Case 94 | 11 | 55,431,897  | 55,431,897  | 2 | 1 | 3 | 0 |
| Case 94 | 11 | 55,432,646  | 62,288,130  | 2 | 2 | 4 | 0 |
| Case 94 | 11 | 62,288,135  | 62,563,587  | 2 | 1 | 3 | 0 |
| Case 94 | 11 | 62,564,009  | 64,052,306  | 2 | 2 | 4 | 0 |
| Case 94 | 11 | 64,052,447  | 66,052,251  | 3 | 1 | 4 | 0 |
| Case 94 | 11 | 66,053,228  | 70,846,961  | 5 | 1 | 6 | 0 |
| Case 94 | 11 | 70,858,182  | 71,007,182  | 4 | 1 | 5 | 0 |
| Case 94 | 11 | 71,010,750  | 71,739,423  | 5 | 1 | 6 | 0 |
| Case 94 | 11 | 71,746,971  | 74,097,466  | 2 | 0 | 2 | 1 |
| Case 94 | 11 | 74,099,892  | 74,651,915  | 3 | 0 | 3 | 1 |
| Case 94 | 11 | 74,660,292  | 75,199,181  | 2 | 0 | 2 | 1 |
| Case 94 | 11 | 75,200,301  | 76,442,114  | 3 | 0 | 3 | 1 |
| Case 94 | 11 | 76,444,267  | 76,813,931  | 2 | 0 | 2 | 1 |
| Case 94 | 11 | 76,813,968  | 77,301,657  | 3 | 0 | 3 | 1 |
| Case 94 | 11 | 77,309,533  | 84,208,616  | 2 | 0 | 2 | 1 |
| Case 94 | 11 | 84,213,870  | 84,379,671  | 1 | 0 | 1 | 0 |
| Case 94 | 11 | 84,379,740  | 85,408,832  | 2 | 0 | 2 | 1 |
| Case 94 | 11 | 85,420,374  | 85,462,141  | 3 | 0 | 3 | 1 |
| Case 94 | 11 | 85,465,395  | 86,111,834  | 2 | 0 | 2 | 1 |
| Case 94 | 11 | 86,116,637  | 86,469,986  | 3 | 0 | 3 | 1 |
| Case 94 | 11 | 86,471,527  | 92,432,549  | 2 | 0 | 2 | 1 |
| Case 94 | 11 | 92,443,925  | 92,749,764  | 3 | 0 | 3 | 1 |
| Case 94 | 11 | 92,751,333  | 93,758,893  | 2 | 0 | 2 | 1 |
| Case 94 | 11 | 93,759,212  | 94,554,975  | 3 | 0 | 3 | 1 |
| Case 94 | 11 | 94,557,996  | 95,578,167  | 2 | 0 | 2 | 1 |
| Case 94 | 11 | 95,579,629  | 95,910,507  | 3 | 0 | 3 | 1 |

|         |    |             |             |   |   |   |   |
|---------|----|-------------|-------------|---|---|---|---|
| Case 94 | 11 | 95,910,538  | 101,343,629 | 2 | 0 | 2 | 1 |
| Case 94 | 11 | 101,344,699 | 101,753,183 | 3 | 0 | 3 | 1 |
| Case 94 | 11 | 101,755,207 | 102,423,890 | 2 | 0 | 2 | 1 |
| Case 94 | 11 | 102,424,184 | 102,656,423 | 3 | 0 | 3 | 1 |
| Case 94 | 11 | 102,657,908 | 110,631,223 | 2 | 0 | 2 | 1 |
| Case 94 | 11 | 110,633,853 | 111,290,086 | 3 | 0 | 3 | 1 |
| Case 94 | 11 | 111,298,298 | 112,693,044 | 2 | 0 | 2 | 1 |
| Case 94 | 11 | 112,694,843 | 113,234,775 | 3 | 0 | 3 | 1 |
| Case 94 | 11 | 113,235,565 | 113,940,469 | 2 | 0 | 2 | 1 |
| Case 94 | 11 | 113,945,609 | 114,092,875 | 3 | 0 | 3 | 1 |
| Case 94 | 11 | 114,093,940 | 115,416,391 | 2 | 0 | 2 | 1 |
| Case 94 | 11 | 115,418,522 | 116,673,768 | 3 | 0 | 3 | 1 |
| Case 94 | 11 | 116,674,818 | 116,714,118 | 2 | 0 | 2 | 1 |
| Case 94 | 11 | 116,719,960 | 117,177,800 | 3 | 0 | 3 | 1 |
| Case 94 | 11 | 117,179,891 | 117,368,982 | 2 | 0 | 2 | 1 |
| Case 94 | 11 | 117,371,563 | 117,594,037 | 3 | 0 | 3 | 1 |
| Case 94 | 11 | 117,594,364 | 117,903,836 | 2 | 0 | 2 | 1 |
| Case 94 | 11 | 117,903,942 | 118,106,242 | 3 | 0 | 3 | 1 |
| Case 94 | 11 | 118,106,253 | 119,175,075 | 2 | 0 | 2 | 1 |
| Case 94 | 11 | 119,176,398 | 119,578,542 | 3 | 0 | 3 | 1 |
| Case 94 | 11 | 119,580,852 | 125,770,425 | 2 | 0 | 2 | 1 |
| Case 94 | 11 | 125,773,903 | 125,881,102 | 3 | 0 | 3 | 1 |
| Case 94 | 11 | 125,885,167 | 126,778,513 | 2 | 0 | 2 | 1 |
| Case 94 | 11 | 126,780,541 | 127,083,003 | 3 | 0 | 3 | 1 |
| Case 94 | 11 | 127,085,601 | 128,592,032 | 2 | 0 | 2 | 1 |
| Case 94 | 11 | 128,592,637 | 130,086,338 | 3 | 0 | 3 | 1 |
| Case 94 | 11 | 130,088,828 | 130,341,170 | 2 | 0 | 2 | 1 |
| Case 94 | 11 | 130,341,207 | 130,598,213 | 3 | 0 | 3 | 1 |
| Case 94 | 11 | 130,600,066 | 134,934,063 | 2 | 0 | 2 | 1 |
| Case 94 | 12 | 191,619     | 999,666     | 3 | 1 | 4 | 0 |
| Case 94 | 12 | 1,001,819   | 1,072,390   | 3 | 0 | 3 | 1 |
| Case 94 | 12 | 1,072,965   | 2,907,932   | 3 | 1 | 4 | 0 |
| Case 94 | 12 | 2,907,978   | 7,048,145   | 3 | 0 | 3 | 1 |
| Case 94 | 12 | 7,048,221   | 8,759,936   | 3 | 1 | 4 | 0 |
| Case 94 | 12 | 8,761,674   | 9,243,017   | 2 | 1 | 3 | 0 |
| Case 94 | 12 | 9,248,214   | 34,200,389  | 3 | 1 | 4 | 0 |
| Case 94 | 12 | 34,210,675  | 34,853,011  | 2 | 1 | 3 | 0 |
| Case 94 | 12 | 37,876,400  | 38,514,872  | 2 | 1 | 3 | 0 |
| Case 94 | 12 | 38,528,487  | 49,298,829  | 3 | 1 | 4 | 0 |
| Case 94 | 12 | 49,298,859  | 49,428,694  | 2 | 1 | 3 | 0 |
| Case 94 | 12 | 49,428,717  | 53,664,148  | 3 | 1 | 4 | 0 |
| Case 94 | 12 | 53,666,713  | 53,700,836  | 2 | 1 | 3 | 0 |
| Case 94 | 12 | 53,700,848  | 69,657,145  | 3 | 1 | 4 | 0 |
| Case 94 | 12 | 69,658,330  | 69,744,014  | 2 | 2 | 4 | 0 |
| Case 94 | 12 | 69,746,033  | 69,901,232  | 3 | 2 | 5 | 0 |
| Case 94 | 12 | 69,931,759  | 124,637,184 | 3 | 1 | 4 | 0 |
| Case 94 | 12 | 124,637,290 | 124,811,972 | 2 | 2 | 4 | 0 |
| Case 94 | 12 | 124,811,994 | 127,726,384 | 3 | 1 | 4 | 0 |
| Case 94 | 12 | 127,727,157 | 127,756,618 | 2 | 1 | 3 | 0 |
| Case 94 | 12 | 127,759,267 | 128,546,979 | 3 | 2 | 5 | 0 |
| Case 94 | 12 | 128,547,161 | 128,919,798 | 2 | 2 | 4 | 0 |
| Case 94 | 12 | 128,919,835 | 128,929,239 | 3 | 1 | 4 | 0 |
| Case 94 | 12 | 128,930,064 | 133,810,935 | 3 | 0 | 3 | 1 |
| Case 94 | 13 | 19,058,717  | 20,464,188  | 4 | 1 | 5 | 0 |
| Case 94 | 13 | 20,469,457  | 20,596,565  | 2 | 0 | 2 | 1 |
| Case 94 | 13 | 20,617,797  | 24,483,053  | 5 | 0 | 5 | 1 |
| Case 94 | 13 | 24,489,605  | 24,564,790  | 6 | 0 | 6 | 1 |
| Case 94 | 13 | 24,565,459  | 35,283,075  | 5 | 0 | 5 | 1 |
| Case 94 | 13 | 35,284,403  | 47,992,832  | 4 | 3 | 7 | 0 |
| Case 94 | 13 | 47,993,684  | 53,512,417  | 5 | 0 | 5 | 1 |
| Case 94 | 13 | 53,512,968  | 54,104,672  | 6 | 0 | 6 | 1 |

|         |    |             |             |   |   |   |   |
|---------|----|-------------|-------------|---|---|---|---|
| Case 94 | 13 | 54,111,175  | 56,968,151  | 5 | 0 | 5 | 1 |
| Case 94 | 13 | 56,972,876  | 57,984,566  | 6 | 0 | 6 | 1 |
| Case 94 | 13 | 58,000,353  | 58,266,222  | 5 | 0 | 5 | 1 |
| Case 94 | 13 | 58,274,172  | 58,503,218  | 3 | 0 | 3 | 1 |
| Case 94 | 13 | 58,511,221  | 58,586,097  | 5 | 0 | 5 | 1 |
| Case 94 | 13 | 58,586,236  | 59,803,799  | 6 | 0 | 6 | 1 |
| Case 94 | 13 | 59,804,025  | 70,047,110  | 5 | 0 | 5 | 1 |
| Case 94 | 13 | 70,049,048  | 72,592,144  | 6 | 0 | 6 | 1 |
| Case 94 | 13 | 72,593,652  | 72,961,202  | 5 | 0 | 5 | 1 |
| Case 94 | 13 | 72,964,292  | 74,553,463  | 6 | 0 | 6 | 1 |
| Case 94 | 13 | 74,558,505  | 74,878,937  | 5 | 0 | 5 | 1 |
| Case 94 | 13 | 74,880,098  | 74,980,088  | 6 | 0 | 6 | 1 |
| Case 94 | 13 | 74,983,154  | 76,482,230  | 5 | 0 | 5 | 1 |
| Case 94 | 13 | 76,486,342  | 76,965,424  | 6 | 0 | 6 | 1 |
| Case 94 | 13 | 76,974,247  | 79,692,676  | 5 | 0 | 5 | 1 |
| Case 94 | 13 | 79,695,827  | 79,730,890  | 4 | 3 | 7 | 0 |
| Case 94 | 13 | 79,734,887  | 79,761,056  | 5 | 0 | 5 | 1 |
| Case 94 | 13 | 79,762,645  | 80,696,432  | 6 | 0 | 6 | 1 |
| Case 94 | 13 | 80,699,166  | 82,164,986  | 5 | 0 | 5 | 1 |
| Case 94 | 13 | 82,170,521  | 82,338,416  | 6 | 0 | 6 | 1 |
| Case 94 | 13 | 82,339,494  | 88,545,547  | 5 | 0 | 5 | 1 |
| Case 94 | 13 | 88,551,345  | 89,051,135  | 6 | 0 | 6 | 1 |
| Case 94 | 13 | 89,056,955  | 89,846,656  | 5 | 0 | 5 | 1 |
| Case 94 | 13 | 89,853,255  | 91,551,236  | 6 | 0 | 6 | 1 |
| Case 94 | 13 | 91,551,549  | 93,334,506  | 5 | 0 | 5 | 1 |
| Case 94 | 13 | 93,354,092  | 93,589,384  | 6 | 0 | 6 | 1 |
| Case 94 | 13 | 93,591,750  | 96,830,749  | 5 | 0 | 5 | 1 |
| Case 94 | 13 | 96,845,557  | 97,463,114  | 6 | 0 | 6 | 1 |
| Case 94 | 13 | 97,465,425  | 104,373,617 | 5 | 0 | 5 | 1 |
| Case 94 | 13 | 104,375,959 | 104,770,851 | 6 | 0 | 6 | 1 |
| Case 94 | 13 | 104,772,962 | 105,516,382 | 5 | 0 | 5 | 1 |
| Case 94 | 13 | 105,521,506 | 105,648,604 | 6 | 0 | 6 | 1 |
| Case 94 | 13 | 105,655,752 | 107,904,667 | 5 | 0 | 5 | 1 |
| Case 94 | 13 | 107,906,038 | 108,484,454 | 6 | 0 | 6 | 1 |
| Case 94 | 13 | 108,488,023 | 114,107,733 | 5 | 0 | 5 | 1 |
| Case 94 | 13 | 114,109,382 | 114,513,674 | 4 | 0 | 4 | 1 |
| Case 94 | 13 | 114,513,969 | 115,103,529 | 5 | 0 | 5 | 1 |
| Case 94 | 14 | 19,280,733  | 20,482,613  | 3 | 1 | 4 | 0 |
| Case 94 | 14 | 20,482,835  | 20,502,779  | 2 | 2 | 4 | 0 |
| Case 94 | 14 | 20,502,866  | 20,820,404  | 3 | 2 | 5 | 0 |
| Case 94 | 14 | 20,822,256  | 22,051,519  | 2 | 2 | 4 | 0 |
| Case 94 | 14 | 22,053,340  | 23,011,465  | 3 | 2 | 5 | 0 |
| Case 94 | 14 | 23,012,544  | 24,135,983  | 2 | 2 | 4 | 0 |
| Case 94 | 14 | 24,136,629  | 24,395,483  | 3 | 2 | 5 | 0 |
| Case 94 | 14 | 24,395,730  | 25,265,236  | 2 | 2 | 4 | 0 |
| Case 94 | 14 | 25,265,961  | 26,593,991  | 3 | 2 | 5 | 0 |
| Case 94 | 14 | 26,594,381  | 28,114,641  | 2 | 2 | 4 | 0 |
| Case 94 | 14 | 28,115,542  | 28,733,630  | 3 | 2 | 5 | 0 |
| Case 94 | 14 | 28,737,460  | 30,314,159  | 2 | 2 | 4 | 0 |
| Case 94 | 14 | 30,327,482  | 36,725,221  | 3 | 2 | 5 | 0 |
| Case 94 | 14 | 36,728,531  | 42,625,616  | 3 | 1 | 4 | 0 |
| Case 94 | 14 | 42,634,072  | 43,365,102  | 1 | 1 | 2 | 0 |
| Case 94 | 14 | 43,367,412  | 43,763,264  | 3 | 1 | 4 | 0 |
| Case 94 | 14 | 43,773,651  | 44,039,374  | 1 | 1 | 2 | 0 |
| Case 94 | 14 | 44,055,539  | 56,969,118  | 3 | 1 | 4 | 0 |
| Case 94 | 14 | 56,972,072  | 70,401,814  | 1 | 1 | 2 | 0 |
| Case 94 | 14 | 70,404,445  | 70,672,989  | 2 | 1 | 3 | 0 |
| Case 94 | 14 | 70,676,661  | 81,949,014  | 1 | 1 | 2 | 0 |
| Case 94 | 14 | 81,950,631  | 81,995,306  | 2 | 1 | 3 | 0 |
| Case 94 | 14 | 81,999,317  | 82,075,469  | 1 | 1 | 2 | 0 |
| Case 94 | 14 | 82,086,207  | 84,699,866  | 3 | 1 | 4 | 0 |

|         |    |             |             |   |   |   |   |
|---------|----|-------------|-------------|---|---|---|---|
| Case 94 | 14 | 84,702,576  | 86,972,015  | 3 | 2 | 5 | 0 |
| Case 94 | 14 | 86,977,841  | 88,774,846  | 2 | 2 | 4 | 0 |
| Case 94 | 14 | 88,774,886  | 89,335,613  | 3 | 2 | 5 | 0 |
| Case 94 | 14 | 89,337,336  | 89,865,924  | 2 | 2 | 4 | 0 |
| Case 94 | 14 | 89,867,481  | 90,359,561  | 3 | 2 | 5 | 0 |
| Case 94 | 14 | 90,369,749  | 91,885,706  | 2 | 2 | 4 | 0 |
| Case 94 | 14 | 91,886,691  | 92,959,216  | 3 | 2 | 5 | 0 |
| Case 94 | 14 | 92,959,857  | 96,437,396  | 2 | 2 | 4 | 0 |
| Case 94 | 14 | 96,444,081  | 96,660,336  | 3 | 2 | 5 | 0 |
| Case 94 | 14 | 96,661,993  | 100,360,262 | 2 | 2 | 4 | 0 |
| Case 94 | 14 | 100,363,561 | 100,571,845 | 3 | 2 | 5 | 0 |
| Case 94 | 14 | 100,572,954 | 103,111,358 | 2 | 2 | 4 | 0 |
| Case 94 | 14 | 103,111,823 | 104,630,711 | 2 | 1 | 3 | 0 |
| Case 94 | 14 | 104,632,699 | 106,094,360 | 2 | 2 | 4 | 0 |
| Case 94 | 14 | 106,103,358 | 107,287,663 | 2 | 1 | 3 | 0 |
| Case 94 | 15 | 20,034,919  | 22,382,893  | 2 | 0 | 2 | 1 |
| Case 94 | 15 | 22,383,188  | 32,443,813  | 3 | 0 | 3 | 1 |
| Case 94 | 15 | 32,509,892  | 32,917,689  | 3 | 1 | 4 | 0 |
| Case 94 | 15 | 32,917,691  | 81,006,170  | 3 | 0 | 3 | 1 |
| Case 94 | 15 | 81,010,115  | 81,143,074  | 5 | 0 | 5 | 1 |
| Case 94 | 15 | 81,151,809  | 102,461,162 | 3 | 0 | 3 | 1 |
| Case 94 | 16 | 88,165      | 575,312     | 2 | 2 | 4 | 0 |
| Case 94 | 16 | 576,495     | 1,561,126   | 2 | 1 | 3 | 0 |
| Case 94 | 16 | 1,564,823   | 1,709,945   | 2 | 2 | 4 | 0 |
| Case 94 | 16 | 1,710,001   | 2,653,657   | 2 | 1 | 3 | 0 |
| Case 94 | 16 | 2,699,304   | 2,753,180   | 4 | 1 | 5 | 0 |
| Case 94 | 16 | 2,753,617   | 2,836,651   | 2 | 1 | 3 | 0 |
| Case 94 | 16 | 2,848,610   | 3,487,431   | 2 | 2 | 4 | 0 |
| Case 94 | 16 | 3,487,500   | 3,647,608   | 2 | 1 | 3 | 0 |
| Case 94 | 16 | 3,647,621   | 4,383,398   | 2 | 2 | 4 | 0 |
| Case 94 | 16 | 4,383,414   | 4,834,069   | 2 | 1 | 3 | 0 |
| Case 94 | 16 | 4,837,509   | 10,979,440  | 2 | 2 | 4 | 0 |
| Case 94 | 16 | 10,989,612  | 11,017,111  | 2 | 1 | 3 | 0 |
| Case 94 | 16 | 11,018,622  | 26,054,595  | 2 | 2 | 4 | 0 |
| Case 94 | 16 | 26,066,489  | 26,784,714  | 3 | 2 | 5 | 0 |
| Case 94 | 16 | 26,786,951  | 27,393,591  | 3 | 1 | 4 | 0 |
| Case 94 | 16 | 27,397,998  | 31,575,186  | 2 | 2 | 4 | 0 |
| Case 94 | 16 | 31,580,272  | 31,765,105  | 3 | 2 | 5 | 0 |
| Case 94 | 16 | 31,765,220  | 33,557,021  | 3 | 1 | 4 | 0 |
| Case 94 | 16 | 33,836,510  | 35,285,582  | 2 | 1 | 3 | 0 |
| Case 94 | 16 | 46,450,037  | 78,487,924  | 2 | 1 | 3 | 0 |
| Case 94 | 16 | 78,491,313  | 78,863,813  | 1 | 0 | 1 | 0 |
| Case 94 | 16 | 78,864,699  | 78,867,839  | 2 | 1 | 3 | 0 |
| Case 94 | 16 | 78,869,317  | 79,074,029  | 1 | 1 | 2 | 0 |
| Case 94 | 16 | 79,075,311  | 90,274,695  | 2 | 1 | 3 | 0 |
| Case 94 | 17 | 11,885      | 7,188,423   | 3 | 0 | 3 | 1 |
| Case 94 | 17 | 7,188,459   | 8,040,294   | 4 | 0 | 4 | 1 |
| Case 94 | 17 | 8,043,753   | 8,243,371   | 3 | 0 | 3 | 1 |
| Case 94 | 17 | 8,243,404   | 9,586,221   | 4 | 0 | 4 | 1 |
| Case 94 | 17 | 9,590,319   | 10,298,628  | 3 | 0 | 3 | 1 |
| Case 94 | 17 | 10,299,899  | 12,439,686  | 2 | 0 | 2 | 1 |
| Case 94 | 17 | 12,449,192  | 12,883,013  | 3 | 0 | 3 | 1 |
| Case 94 | 17 | 12,887,379  | 13,565,898  | 2 | 0 | 2 | 1 |
| Case 94 | 17 | 13,567,081  | 13,678,835  | 2 | 1 | 3 | 0 |
| Case 94 | 17 | 13,681,058  | 14,619,091  | 2 | 0 | 2 | 1 |
| Case 94 | 17 | 14,619,256  | 15,565,952  | 3 | 0 | 3 | 1 |
| Case 94 | 17 | 15,574,117  | 16,229,232  | 2 | 0 | 2 | 1 |
| Case 94 | 17 | 16,238,203  | 17,075,759  | 4 | 0 | 4 | 1 |
| Case 94 | 17 | 17,076,092  | 17,544,704  | 3 | 0 | 3 | 1 |
| Case 94 | 17 | 17,561,094  | 17,884,660  | 2 | 0 | 2 | 1 |
| Case 94 | 17 | 17,887,186  | 18,045,098  | 3 | 0 | 3 | 1 |

|         |    |            |            |   |   |   |   |
|---------|----|------------|------------|---|---|---|---|
| Case 94 | 17 | 18,046,074 | 19,843,127 | 2 | 0 | 2 | 1 |
| Case 94 | 17 | 19,848,450 | 22,242,355 | 2 | 1 | 3 | 0 |
| Case 94 | 17 | 25,268,142 | 34,436,708 | 2 | 1 | 3 | 0 |
| Case 94 | 17 | 34,443,811 | 34,468,886 | 4 | 1 | 5 | 0 |
| Case 94 | 17 | 34,476,396 | 36,898,393 | 2 | 1 | 3 | 0 |
| Case 94 | 17 | 36,899,045 | 40,262,917 | 3 | 1 | 4 | 0 |
| Case 94 | 17 | 40,263,400 | 81,060,040 | 2 | 1 | 3 | 0 |
| Case 94 | 18 | 87,505     | 347,128    | 2 | 1 | 3 | 0 |
| Case 94 | 18 | 348,145    | 6,287,726  | 2 | 2 | 4 | 0 |
| Case 94 | 18 | 6,293,561  | 7,944,247  | 2 | 1 | 3 | 0 |
| Case 94 | 18 | 7,944,381  | 15,375,878 | 2 | 2 | 4 | 0 |
| Case 94 | 18 | 18,520,354 | 39,488,062 | 2 | 2 | 4 | 0 |
| Case 94 | 18 | 39,492,129 | 71,072,228 | 2 | 1 | 3 | 0 |
| Case 94 | 18 | 71,074,190 | 71,080,360 | 1 | 0 | 1 | 0 |
| Case 94 | 18 | 71,080,482 | 78,015,180 | 2 | 1 | 3 | 0 |
| Case 94 | 19 | 260,912    | 1,046,520  | 2 | 1 | 3 | 0 |
| Case 94 | 19 | 1,047,016  | 1,054,324  | 1 | 1 | 2 | 0 |
| Case 94 | 19 | 1,054,326  | 21,105,097 | 2 | 1 | 3 | 0 |
| Case 94 | 19 | 21,107,489 | 21,720,803 | 1 | 1 | 2 | 0 |
| Case 94 | 19 | 21,740,058 | 24,629,285 | 2 | 1 | 3 | 0 |
| Case 94 | 19 | 27,732,159 | 27,928,613 | 2 | 1 | 3 | 0 |
| Case 94 | 19 | 27,960,006 | 29,996,879 | 3 | 2 | 5 | 0 |
| Case 94 | 19 | 29,996,906 | 32,011,548 | 3 | 1 | 4 | 0 |
| Case 94 | 19 | 32,012,510 | 34,712,618 | 3 | 2 | 5 | 0 |
| Case 94 | 19 | 34,718,735 | 34,904,702 | 2 | 2 | 4 | 0 |
| Case 94 | 19 | 34,904,953 | 35,434,582 | 3 | 2 | 5 | 0 |
| Case 94 | 19 | 35,434,648 | 44,223,536 | 3 | 1 | 4 | 0 |
| Case 94 | 19 | 44,223,621 | 44,263,486 | 2 | 2 | 4 | 0 |
| Case 94 | 19 | 44,263,766 | 44,979,443 | 3 | 2 | 5 | 0 |
| Case 94 | 19 | 44,980,752 | 59,097,160 | 3 | 1 | 4 | 0 |
| Case 94 | 20 | 63,244     | 6,740,089  | 4 | 1 | 5 | 0 |
| Case 94 | 20 | 6,740,317  | 7,085,280  | 4 | 2 | 6 | 0 |
| Case 94 | 20 | 7,092,386  | 7,929,520  | 4 | 1 | 5 | 0 |
| Case 94 | 20 | 7,942,754  | 8,547,958  | 4 | 2 | 6 | 0 |
| Case 94 | 20 | 8,551,344  | 9,459,927  | 5 | 1 | 6 | 0 |
| Case 94 | 20 | 9,462,537  | 10,727,013 | 4 | 1 | 5 | 0 |
| Case 94 | 20 | 10,730,032 | 12,250,349 | 4 | 2 | 6 | 0 |
| Case 94 | 20 | 12,250,398 | 12,790,887 | 4 | 1 | 5 | 0 |
| Case 94 | 20 | 12,794,193 | 13,079,469 | 5 | 1 | 6 | 0 |
| Case 94 | 20 | 13,082,281 | 14,822,794 | 4 | 1 | 5 | 0 |
| Case 94 | 20 | 14,823,472 | 14,908,741 | 2 | 0 | 2 | 1 |
| Case 94 | 20 | 14,910,258 | 15,207,464 | 1 | 0 | 1 | 0 |
| Case 94 | 20 | 15,210,624 | 15,305,258 | 2 | 0 | 2 | 1 |
| Case 94 | 20 | 15,305,341 | 15,341,045 | 3 | 1 | 4 | 0 |
| Case 94 | 20 | 15,342,012 | 16,153,510 | 5 | 1 | 6 | 0 |
| Case 94 | 20 | 16,156,745 | 16,582,448 | 4 | 1 | 5 | 0 |
| Case 94 | 20 | 16,585,314 | 17,473,671 | 5 | 1 | 6 | 0 |
| Case 94 | 20 | 17,474,690 | 17,807,984 | 4 | 1 | 5 | 0 |
| Case 94 | 20 | 17,809,298 | 18,513,350 | 5 | 1 | 6 | 0 |
| Case 94 | 20 | 18,513,372 | 19,618,037 | 4 | 1 | 5 | 0 |
| Case 94 | 20 | 19,624,373 | 20,030,870 | 5 | 1 | 6 | 0 |
| Case 94 | 20 | 20,031,667 | 21,231,919 | 4 | 1 | 5 | 0 |
| Case 94 | 20 | 21,233,553 | 22,964,954 | 5 | 1 | 6 | 0 |
| Case 94 | 20 | 22,966,362 | 26,293,985 | 4 | 1 | 5 | 0 |
| Case 94 | 20 | 29,425,357 | 35,545,171 | 4 | 1 | 5 | 0 |
| Case 94 | 20 | 35,545,175 | 35,796,541 | 5 | 1 | 6 | 0 |
| Case 94 | 20 | 35,796,575 | 37,943,619 | 4 | 1 | 5 | 0 |
| Case 94 | 20 | 37,945,267 | 39,414,924 | 5 | 1 | 6 | 0 |
| Case 94 | 20 | 39,415,122 | 45,989,369 | 4 | 1 | 5 | 0 |
| Case 94 | 20 | 46,000,938 | 46,264,796 | 5 | 1 | 6 | 0 |
| Case 94 | 20 | 46,264,805 | 50,781,235 | 4 | 1 | 5 | 0 |

|         |    |            |            |   |   |   |   |
|---------|----|------------|------------|---|---|---|---|
| Case 94 | 20 | 50,781,298 | 51,649,730 | 5 | 1 | 6 | 0 |
| Case 94 | 20 | 51,649,948 | 52,384,363 | 4 | 1 | 5 | 0 |
| Case 94 | 20 | 52,384,747 | 54,574,544 | 5 | 1 | 6 | 0 |
| Case 94 | 20 | 54,577,556 | 56,531,238 | 4 | 1 | 5 | 0 |
| Case 94 | 20 | 56,531,905 | 56,984,094 | 5 | 1 | 6 | 0 |
| Case 94 | 20 | 56,992,230 | 58,413,101 | 4 | 1 | 5 | 0 |
| Case 94 | 20 | 58,416,428 | 58,514,445 | 5 | 1 | 6 | 0 |
| Case 94 | 20 | 58,514,466 | 62,948,788 | 4 | 1 | 5 | 0 |
| Case 94 | 21 | 10,827,533 | 10,971,337 | 2 | 1 | 3 | 0 |
| Case 94 | 21 | 14,368,320 | 14,779,379 | 1 | 0 | 1 | 0 |
| Case 94 | 21 | 14,795,475 | 15,514,013 | 2 | 0 | 2 | 1 |
| Case 94 | 21 | 15,515,843 | 16,287,889 | 1 | 0 | 1 | 0 |
| Case 94 | 21 | 16,295,354 | 18,381,340 | 2 | 0 | 2 | 1 |
| Case 94 | 21 | 18,381,801 | 18,900,044 | 3 | 0 | 3 | 1 |
| Case 94 | 21 | 18,901,969 | 20,595,409 | 2 | 0 | 2 | 1 |
| Case 94 | 21 | 20,604,811 | 21,232,841 | 1 | 0 | 1 | 0 |
| Case 94 | 21 | 21,240,976 | 30,925,949 | 2 | 0 | 2 | 1 |
| Case 94 | 21 | 30,925,976 | 31,062,501 | 3 | 0 | 3 | 1 |
| Case 94 | 21 | 31,073,435 | 34,059,352 | 2 | 0 | 2 | 1 |
| Case 94 | 21 | 34,086,304 | 37,416,208 | 3 | 0 | 3 | 1 |
| Case 94 | 21 | 37,416,230 | 37,836,711 | 2 | 0 | 2 | 1 |
| Case 94 | 21 | 37,837,930 | 38,428,649 | 3 | 0 | 3 | 1 |
| Case 94 | 21 | 38,429,389 | 40,492,274 | 2 | 0 | 2 | 1 |
| Case 94 | 21 | 40,492,859 | 40,669,083 | 1 | 0 | 1 | 0 |
| Case 94 | 21 | 40,669,305 | 40,778,305 | 2 | 0 | 2 | 1 |
| Case 94 | 21 | 40,780,560 | 40,847,614 | 1 | 0 | 1 | 0 |
| Case 94 | 21 | 40,848,174 | 41,460,146 | 2 | 0 | 2 | 1 |
| Case 94 | 21 | 41,460,412 | 41,804,859 | 1 | 0 | 1 | 0 |
| Case 94 | 21 | 41,813,285 | 44,781,356 | 2 | 0 | 2 | 1 |
| Case 94 | 21 | 44,783,399 | 45,149,133 | 1 | 0 | 1 | 0 |
| Case 94 | 21 | 45,151,874 | 45,679,399 | 2 | 0 | 2 | 1 |
| Case 94 | 21 | 45,679,565 | 45,708,288 | 1 | 0 | 1 | 0 |
| Case 94 | 21 | 45,709,153 | 46,023,713 | 2 | 0 | 2 | 1 |
| Case 94 | 21 | 46,028,252 | 46,115,163 | 1 | 0 | 1 | 0 |
| Case 94 | 21 | 46,116,223 | 46,538,491 | 2 | 0 | 2 | 1 |
| Case 94 | 21 | 46,539,725 | 46,646,546 | 1 | 0 | 1 | 0 |
| Case 94 | 21 | 46,647,078 | 46,809,884 | 2 | 0 | 2 | 1 |
| Case 94 | 21 | 46,814,171 | 46,956,571 | 1 | 0 | 1 | 0 |
| Case 94 | 21 | 46,957,695 | 47,373,412 | 2 | 0 | 2 | 1 |
| Case 94 | 21 | 47,376,659 | 47,766,883 | 1 | 0 | 1 | 0 |
| Case 94 | 21 | 47,766,895 | 47,805,891 | 2 | 0 | 2 | 1 |
| Case 94 | 21 | 47,808,673 | 47,954,567 | 1 | 0 | 1 | 0 |
| Case 94 | 21 | 47,954,727 | 48,100,155 | 2 | 0 | 2 | 1 |
| Case 94 | 22 | 16,114,244 | 17,436,762 | 3 | 1 | 4 | 0 |
| Case 94 | 22 | 17,436,846 | 45,059,248 | 2 | 1 | 3 | 0 |
| Case 94 | 22 | 45,063,743 | 45,258,333 | 3 | 1 | 4 | 0 |
| Case 94 | 22 | 45,258,344 | 45,569,845 | 2 | 1 | 3 | 0 |
| Case 94 | 22 | 45,573,450 | 45,821,887 | 3 | 1 | 4 | 0 |
| Case 94 | 22 | 45,821,909 | 51,195,728 | 2 | 1 | 3 | 0 |
| Case 95 | 1  | 82,154     | 1,005,806  | 2 | 0 | 2 | 1 |
| Case 95 | 1  | 1,017,197  | 1,275,797  | 2 | 1 | 3 | 0 |
| Case 95 | 1  | 1,275,804  | 1,745,726  | 2 | 2 | 4 | 0 |
| Case 95 | 1  | 1,756,864  | 6,305,557  | 2 | 1 | 3 | 0 |
| Case 95 | 1  | 6,306,912  | 6,501,796  | 3 | 1 | 4 | 0 |
| Case 95 | 1  | 6,504,575  | 12,725,971 | 2 | 1 | 3 | 0 |
| Case 95 | 1  | 12,725,976 | 13,885,203 | 3 | 1 | 4 | 0 |
| Case 95 | 1  | 13,885,279 | 14,198,107 | 2 | 1 | 3 | 0 |
| Case 95 | 1  | 14,198,401 | 14,354,311 | 3 | 1 | 4 | 0 |
| Case 95 | 1  | 14,358,424 | 14,507,057 | 2 | 1 | 3 | 0 |
| Case 95 | 1  | 14,507,542 | 15,792,586 | 3 | 1 | 4 | 0 |
| Case 95 | 1  | 15,793,924 | 16,134,072 | 2 | 1 | 3 | 0 |

|         |   |             |             |   |   |   |   |
|---------|---|-------------|-------------|---|---|---|---|
| Case 95 | 1 | 16,142,960  | 16,345,735  | 2 | 2 | 4 | 0 |
| Case 95 | 1 | 16,346,507  | 17,004,186  | 2 | 1 | 3 | 0 |
| Case 95 | 1 | 17,004,850  | 17,588,162  | 3 | 1 | 4 | 0 |
| Case 95 | 1 | 17,588,646  | 17,668,563  | 2 | 1 | 3 | 0 |
| Case 95 | 1 | 17,668,609  | 18,044,374  | 3 | 1 | 4 | 0 |
| Case 95 | 1 | 18,046,287  | 20,141,465  | 3 | 0 | 3 | 1 |
| Case 95 | 1 | 20,141,528  | 20,664,227  | 4 | 0 | 4 | 1 |
| Case 95 | 1 | 20,664,303  | 24,246,872  | 3 | 0 | 3 | 1 |
| Case 95 | 1 | 24,256,932  | 24,625,549  | 4 | 0 | 4 | 1 |
| Case 95 | 1 | 24,633,812  | 29,149,361  | 3 | 0 | 3 | 1 |
| Case 95 | 1 | 29,151,183  | 29,438,907  | 4 | 0 | 4 | 1 |
| Case 95 | 1 | 29,443,723  | 31,471,702  | 3 | 0 | 3 | 1 |
| Case 95 | 1 | 31,490,614  | 32,265,054  | 4 | 0 | 4 | 1 |
| Case 95 | 1 | 32,265,676  | 36,474,632  | 3 | 0 | 3 | 1 |
| Case 95 | 1 | 36,479,642  | 36,488,199  | 4 | 0 | 4 | 1 |
| Case 95 | 1 | 36,492,651  | 36,749,925  | 3 | 2 | 5 | 0 |
| Case 95 | 1 | 36,752,410  | 46,633,874  | 3 | 0 | 3 | 1 |
| Case 95 | 1 | 46,635,209  | 46,736,157  | 4 | 0 | 4 | 1 |
| Case 95 | 1 | 46,736,339  | 46,830,447  | 3 | 0 | 3 | 1 |
| Case 95 | 1 | 46,834,775  | 53,633,248  | 2 | 0 | 2 | 1 |
| Case 95 | 1 | 53,641,911  | 54,154,726  | 3 | 0 | 3 | 1 |
| Case 95 | 1 | 54,163,854  | 64,129,393  | 2 | 0 | 2 | 1 |
| Case 95 | 1 | 64,137,298  | 64,221,188  | 3 | 0 | 3 | 1 |
| Case 95 | 1 | 64,221,794  | 68,876,172  | 2 | 0 | 2 | 1 |
| Case 95 | 1 | 68,881,919  | 69,237,446  | 1 | 0 | 1 | 0 |
| Case 95 | 1 | 69,239,442  | 70,084,699  | 2 | 0 | 2 | 1 |
| Case 95 | 1 | 70,084,797  | 72,222,487  | 1 | 0 | 1 | 0 |
| Case 95 | 1 | 72,234,070  | 81,096,254  | 2 | 0 | 2 | 1 |
| Case 95 | 1 | 81,107,836  | 82,225,803  | 1 | 0 | 1 | 0 |
| Case 95 | 1 | 82,228,427  | 88,402,963  | 2 | 0 | 2 | 1 |
| Case 95 | 1 | 88,410,277  | 88,866,145  | 3 | 0 | 3 | 1 |
| Case 95 | 1 | 88,868,236  | 93,895,801  | 2 | 0 | 2 | 1 |
| Case 95 | 1 | 93,897,624  | 94,250,201  | 3 | 0 | 3 | 1 |
| Case 95 | 1 | 94,272,119  | 98,245,622  | 2 | 0 | 2 | 1 |
| Case 95 | 1 | 98,245,741  | 98,309,733  | 1 | 0 | 1 | 0 |
| Case 95 | 1 | 98,314,655  | 102,717,010 | 2 | 0 | 2 | 1 |
| Case 95 | 1 | 102,726,399 | 104,297,239 | 1 | 0 | 1 | 0 |
| Case 95 | 1 | 104,309,132 | 106,945,362 | 0 | 0 | 0 | 0 |
| Case 95 | 1 | 106,948,136 | 107,160,841 | 1 | 0 | 1 | 0 |
| Case 95 | 1 | 107,162,694 | 107,927,163 | 2 | 0 | 2 | 1 |
| Case 95 | 1 | 107,927,932 | 108,313,258 | 3 | 0 | 3 | 1 |
| Case 95 | 1 | 108,315,137 | 110,357,536 | 2 | 0 | 2 | 1 |
| Case 95 | 1 | 110,359,882 | 110,759,796 | 3 | 0 | 3 | 1 |
| Case 95 | 1 | 110,760,189 | 117,234,297 | 2 | 0 | 2 | 1 |
| Case 95 | 1 | 117,236,379 | 117,376,448 | 2 | 1 | 3 | 0 |
| Case 95 | 1 | 117,384,443 | 117,617,973 | 2 | 2 | 4 | 0 |
| Case 95 | 1 | 117,618,024 | 117,737,486 | 2 | 1 | 3 | 0 |
| Case 95 | 1 | 117,738,637 | 120,438,488 | 2 | 2 | 4 | 0 |
| Case 95 | 1 | 120,438,577 | 121,346,616 | 2 | 1 | 3 | 0 |
| Case 95 | 1 | 142,649,718 | 145,021,126 | 2 | 1 | 3 | 0 |
| Case 95 | 1 | 145,075,809 | 152,275,453 | 2 | 2 | 4 | 0 |
| Case 95 | 1 | 152,275,523 | 152,286,487 | 2 | 1 | 3 | 0 |
| Case 95 | 1 | 152,286,592 | 155,713,650 | 2 | 2 | 4 | 0 |
| Case 95 | 1 | 155,723,008 | 155,951,502 | 2 | 1 | 3 | 0 |
| Case 95 | 1 | 155,978,725 | 156,696,974 | 2 | 2 | 4 | 0 |
| Case 95 | 1 | 156,697,056 | 157,005,154 | 2 | 1 | 3 | 0 |
| Case 95 | 1 | 157,006,976 | 157,961,861 | 2 | 2 | 4 | 0 |
| Case 95 | 1 | 157,962,973 | 160,408,563 | 2 | 1 | 3 | 0 |
| Case 95 | 1 | 160,409,987 | 160,846,284 | 2 | 2 | 4 | 0 |
| Case 95 | 1 | 160,846,458 | 161,681,848 | 2 | 1 | 3 | 0 |
| Case 95 | 1 | 161,681,869 | 163,836,535 | 2 | 2 | 4 | 0 |



|         |   |             |             |   |   |   |   |
|---------|---|-------------|-------------|---|---|---|---|
| Case 95 | 1 | 163,836,720 | 164,603,526 | 2 | 1 | 3 | 0 |
| Case 95 | 1 | 164,603,902 | 165,107,381 | 2 | 2 | 4 | 0 |
| Case 95 | 1 | 165,111,242 | 166,334,060 | 2 | 1 | 3 | 0 |
| Case 95 | 1 | 166,336,254 | 166,882,737 | 2 | 2 | 4 | 0 |
| Case 95 | 1 | 166,885,604 | 168,566,850 | 2 | 1 | 3 | 0 |
| Case 95 | 1 | 168,568,911 | 168,907,616 | 2 | 2 | 4 | 0 |
| Case 95 | 1 | 168,907,899 | 169,583,996 | 2 | 1 | 3 | 0 |
| Case 95 | 1 | 169,584,545 | 169,692,522 | 2 | 2 | 4 | 0 |
| Case 95 | 1 | 169,694,695 | 170,379,773 | 2 | 1 | 3 | 0 |
| Case 95 | 1 | 170,380,480 | 170,928,671 | 2 | 2 | 4 | 0 |
| Case 95 | 1 | 170,928,730 | 171,082,759 | 2 | 1 | 3 | 0 |
| Case 95 | 1 | 171,082,896 | 171,172,147 | 2 | 2 | 4 | 0 |
| Case 95 | 1 | 171,172,780 | 171,765,964 | 2 | 1 | 3 | 0 |
| Case 95 | 1 | 171,766,352 | 172,146,648 | 3 | 1 | 4 | 0 |
| Case 95 | 1 | 172,153,224 | 172,417,598 | 2 | 1 | 3 | 0 |
| Case 95 | 1 | 172,419,651 | 172,613,241 | 2 | 2 | 4 | 0 |
| Case 95 | 1 | 172,615,395 | 175,444,672 | 2 | 1 | 3 | 0 |
| Case 95 | 1 | 175,444,933 | 175,585,312 | 2 | 2 | 4 | 0 |
| Case 95 | 1 | 175,585,503 | 177,433,277 | 2 | 1 | 3 | 0 |
| Case 95 | 1 | 177,434,054 | 177,842,162 | 2 | 2 | 4 | 0 |
| Case 95 | 1 | 177,843,620 | 180,010,349 | 2 | 1 | 3 | 0 |
| Case 95 | 1 | 180,010,837 | 180,393,514 | 3 | 1 | 4 | 0 |
| Case 95 | 1 | 180,394,157 | 181,296,409 | 2 | 1 | 3 | 0 |
| Case 95 | 1 | 181,299,951 | 181,674,891 | 2 | 2 | 4 | 0 |
| Case 95 | 1 | 181,686,216 | 182,042,119 | 2 | 1 | 3 | 0 |
| Case 95 | 1 | 182,053,214 | 182,185,360 | 2 | 2 | 4 | 0 |
| Case 95 | 1 | 182,200,659 | 182,474,029 | 2 | 1 | 3 | 0 |
| Case 95 | 1 | 182,474,160 | 183,061,890 | 2 | 2 | 4 | 0 |
| Case 95 | 1 | 183,071,024 | 183,260,894 | 2 | 1 | 3 | 0 |
| Case 95 | 1 | 183,263,356 | 199,018,143 | 2 | 2 | 4 | 0 |
| Case 95 | 1 | 199,019,492 | 199,265,270 | 3 | 2 | 5 | 0 |
| Case 95 | 1 | 199,266,874 | 200,728,818 | 3 | 1 | 4 | 0 |
| Case 95 | 1 | 200,750,576 | 201,085,996 | 1 | 1 | 2 | 0 |
| Case 95 | 1 | 201,088,889 | 201,437,568 | 2 | 1 | 3 | 0 |
| Case 95 | 1 | 201,437,730 | 202,100,239 | 1 | 1 | 2 | 0 |
| Case 95 | 1 | 202,104,282 | 202,252,752 | 2 | 1 | 3 | 0 |
| Case 95 | 1 | 202,266,547 | 203,468,932 | 1 | 1 | 2 | 0 |
| Case 95 | 1 | 203,472,112 | 203,747,752 | 2 | 1 | 3 | 0 |
| Case 95 | 1 | 203,749,270 | 214,324,877 | 1 | 1 | 2 | 0 |
| Case 95 | 1 | 214,332,987 | 216,214,996 | 2 | 1 | 3 | 0 |
| Case 95 | 1 | 216,215,741 | 226,044,766 | 1 | 1 | 2 | 0 |
| Case 95 | 1 | 226,046,964 | 234,600,919 | 2 | 1 | 3 | 0 |
| Case 95 | 1 | 234,601,414 | 234,806,995 | 3 | 1 | 4 | 0 |
| Case 95 | 1 | 234,808,507 | 235,152,757 | 3 | 2 | 5 | 0 |
| Case 95 | 1 | 235,185,285 | 237,886,146 | 2 | 1 | 3 | 0 |
| Case 95 | 1 | 237,896,307 | 239,713,659 | 2 | 2 | 4 | 0 |
| Case 95 | 1 | 239,714,774 | 241,576,302 | 2 | 1 | 3 | 0 |
| Case 95 | 1 | 241,577,094 | 242,035,430 | 2 | 2 | 4 | 0 |
| Case 95 | 1 | 242,035,433 | 242,694,809 | 2 | 1 | 3 | 0 |
| Case 95 | 1 | 242,695,639 | 242,765,639 | 2 | 2 | 4 | 0 |
| Case 95 | 1 | 242,767,005 | 243,644,497 | 2 | 1 | 3 | 0 |
| Case 95 | 1 | 243,647,497 | 244,161,728 | 2 | 2 | 4 | 0 |
| Case 95 | 1 | 244,161,982 | 246,347,153 | 2 | 1 | 3 | 0 |
| Case 95 | 1 | 246,349,328 | 246,495,633 | 1 | 1 | 2 | 0 |
| Case 95 | 1 | 246,512,218 | 246,854,862 | 3 | 1 | 4 | 0 |
| Case 95 | 1 | 246,859,182 | 248,012,296 | 2 | 1 | 3 | 0 |
| Case 95 | 1 | 248,014,871 | 248,079,963 | 1 | 1 | 2 | 0 |
| Case 95 | 1 | 248,082,848 | 249,218,992 | 2 | 1 | 3 | 0 |
| Case 95 | 2 | 18,674      | 10,330,025  | 1 | 1 | 2 | 0 |
| Case 95 | 2 | 10,332,539  | 10,393,038  | 2 | 1 | 3 | 0 |
| Case 95 | 2 | 10,394,082  | 11,702,960  | 1 | 1 | 2 | 0 |

|         |   |             |             |   |   |   |   |
|---------|---|-------------|-------------|---|---|---|---|
| Case 95 | 2 | 11,706,672  | 12,083,477  | 2 | 1 | 3 | 0 |
| Case 95 | 2 | 12,084,726  | 26,053,166  | 1 | 1 | 2 | 0 |
| Case 95 | 2 | 26,075,213  | 26,798,961  | 2 | 1 | 3 | 0 |
| Case 95 | 2 | 26,798,967  | 27,258,251  | 3 | 1 | 4 | 0 |
| Case 95 | 2 | 27,259,421  | 27,907,473  | 2 | 1 | 3 | 0 |
| Case 95 | 2 | 27,907,918  | 28,098,724  | 3 | 1 | 4 | 0 |
| Case 95 | 2 | 28,113,157  | 28,498,321  | 2 | 1 | 3 | 0 |
| Case 95 | 2 | 28,510,347  | 28,712,734  | 2 | 2 | 4 | 0 |
| Case 95 | 2 | 28,713,416  | 28,764,572  | 2 | 1 | 3 | 0 |
| Case 95 | 2 | 28,764,604  | 28,833,479  | 3 | 1 | 4 | 0 |
| Case 95 | 2 | 28,836,285  | 32,640,782  | 2 | 1 | 3 | 0 |
| Case 95 | 2 | 32,641,040  | 32,891,833  | 1 | 1 | 2 | 0 |
| Case 95 | 2 | 32,897,055  | 42,900,991  | 2 | 1 | 3 | 0 |
| Case 95 | 2 | 42,903,494  | 43,361,256  | 3 | 1 | 4 | 0 |
| Case 95 | 2 | 43,362,380  | 47,602,434  | 2 | 1 | 3 | 0 |
| Case 95 | 2 | 47,604,154  | 47,763,019  | 2 | 2 | 4 | 0 |
| Case 95 | 2 | 47,763,895  | 69,503,332  | 2 | 1 | 3 | 0 |
| Case 95 | 2 | 69,513,030  | 69,936,635  | 3 | 1 | 4 | 0 |
| Case 95 | 2 | 69,939,841  | 74,802,217  | 2 | 1 | 3 | 0 |
| Case 95 | 2 | 74,803,613  | 75,125,907  | 2 | 2 | 4 | 0 |
| Case 95 | 2 | 75,128,656  | 79,472,697  | 2 | 1 | 3 | 0 |
| Case 95 | 2 | 79,476,674  | 79,966,298  | 1 | 1 | 2 | 0 |
| Case 95 | 2 | 79,968,075  | 85,405,262  | 2 | 1 | 3 | 0 |
| Case 95 | 2 | 85,408,298  | 85,420,124  | 3 | 0 | 3 | 1 |
| Case 95 | 2 | 85,420,870  | 85,876,681  | 4 | 0 | 4 | 1 |
| Case 95 | 2 | 85,877,081  | 92,081,640  | 2 | 1 | 3 | 0 |
| Case 95 | 2 | 95,429,424  | 102,412,586 | 2 | 1 | 3 | 0 |
| Case 95 | 2 | 102,415,252 | 102,749,240 | 3 | 1 | 4 | 0 |
| Case 95 | 2 | 102,757,216 | 105,915,058 | 2 | 1 | 3 | 0 |
| Case 95 | 2 | 105,918,939 | 106,032,291 | 2 | 2 | 4 | 0 |
| Case 95 | 2 | 106,034,305 | 108,631,729 | 2 | 1 | 3 | 0 |
| Case 95 | 2 | 108,640,313 | 109,233,079 | 3 | 1 | 4 | 0 |
| Case 95 | 2 | 109,237,865 | 113,495,785 | 2 | 1 | 3 | 0 |
| Case 95 | 2 | 113,496,452 | 113,590,467 | 3 | 1 | 4 | 0 |
| Case 95 | 2 | 113,591,275 | 128,783,825 | 2 | 1 | 3 | 0 |
| Case 95 | 2 | 128,801,224 | 129,126,942 | 3 | 1 | 4 | 0 |
| Case 95 | 2 | 129,128,066 | 142,032,671 | 2 | 1 | 3 | 0 |
| Case 95 | 2 | 142,035,286 | 142,088,764 | 1 | 1 | 2 | 0 |
| Case 95 | 2 | 142,092,565 | 165,567,695 | 2 | 1 | 3 | 0 |
| Case 95 | 2 | 165,568,585 | 165,890,733 | 2 | 2 | 4 | 0 |
| Case 95 | 2 | 165,902,214 | 213,824,781 | 2 | 1 | 3 | 0 |
| Case 95 | 2 | 213,825,327 | 214,117,303 | 1 | 1 | 2 | 0 |
| Case 95 | 2 | 214,117,958 | 214,417,111 | 2 | 1 | 3 | 0 |
| Case 95 | 2 | 214,451,568 | 215,014,212 | 1 | 1 | 2 | 0 |
| Case 95 | 2 | 215,019,834 | 243,048,760 | 2 | 1 | 3 | 0 |
| Case 95 | 3 | 61,495      | 182,674     | 3 | 0 | 3 | 1 |
| Case 95 | 3 | 185,281     | 877,099     | 4 | 0 | 4 | 1 |
| Case 95 | 3 | 880,532     | 6,673,106   | 3 | 0 | 3 | 1 |
| Case 95 | 3 | 6,675,541   | 9,882,275   | 4 | 0 | 4 | 1 |
| Case 95 | 3 | 9,882,473   | 10,212,494  | 3 | 0 | 3 | 1 |
| Case 95 | 3 | 10,215,950  | 10,975,849  | 4 | 0 | 4 | 1 |
| Case 95 | 3 | 10,975,851  | 11,669,322  | 3 | 0 | 3 | 1 |
| Case 95 | 3 | 11,670,573  | 11,714,521  | 4 | 0 | 4 | 1 |
| Case 95 | 3 | 11,714,890  | 11,860,940  | 3 | 0 | 3 | 1 |
| Case 95 | 3 | 11,861,966  | 12,451,337  | 4 | 0 | 4 | 1 |
| Case 95 | 3 | 12,451,593  | 12,749,130  | 3 | 0 | 3 | 1 |
| Case 95 | 3 | 12,763,841  | 12,830,079  | 4 | 0 | 4 | 1 |
| Case 95 | 3 | 12,836,792  | 13,093,188  | 3 | 0 | 3 | 1 |
| Case 95 | 3 | 13,095,532  | 14,659,515  | 4 | 0 | 4 | 1 |
| Case 95 | 3 | 14,661,876  | 14,661,876  | 2 | 0 | 2 | 1 |
| Case 95 | 3 | 14,665,333  | 14,829,349  | 5 | 0 | 5 | 1 |

|         |   |            |            |   |   |   |   |
|---------|---|------------|------------|---|---|---|---|
| Case 95 | 3 | 14,830,469 | 14,837,473 | 2 | 0 | 2 | 1 |
| Case 95 | 3 | 14,841,602 | 15,565,683 | 4 | 0 | 4 | 1 |
| Case 95 | 3 | 15,589,591 | 16,381,111 | 3 | 0 | 3 | 1 |
| Case 95 | 3 | 16,385,395 | 36,817,025 | 4 | 0 | 4 | 1 |
| Case 95 | 3 | 36,825,139 | 37,067,255 | 3 | 0 | 3 | 1 |
| Case 95 | 3 | 37,067,306 | 37,089,011 | 4 | 0 | 4 | 1 |
| Case 95 | 3 | 37,089,098 | 37,520,793 | 3 | 3 | 6 | 0 |
| Case 95 | 3 | 37,521,988 | 37,639,213 | 3 | 0 | 3 | 1 |
| Case 95 | 3 | 37,641,584 | 38,342,864 | 4 | 0 | 4 | 1 |
| Case 95 | 3 | 38,346,534 | 38,656,033 | 3 | 0 | 3 | 1 |
| Case 95 | 3 | 38,657,899 | 39,142,562 | 4 | 0 | 4 | 1 |
| Case 95 | 3 | 39,142,568 | 42,647,115 | 3 | 0 | 3 | 1 |
| Case 95 | 3 | 42,652,674 | 43,038,237 | 4 | 0 | 4 | 1 |
| Case 95 | 3 | 43,048,159 | 45,623,541 | 3 | 0 | 3 | 1 |
| Case 95 | 3 | 45,623,809 | 46,304,606 | 2 | 0 | 2 | 1 |
| Case 95 | 3 | 46,306,642 | 46,755,773 | 3 | 0 | 3 | 1 |
| Case 95 | 3 | 46,755,841 | 47,033,125 | 2 | 0 | 2 | 1 |
| Case 95 | 3 | 47,036,565 | 47,036,756 | 0 | 0 | 0 | 0 |
| Case 95 | 3 | 47,036,825 | 48,407,462 | 2 | 0 | 2 | 1 |
| Case 95 | 3 | 48,410,374 | 48,559,436 | 3 | 0 | 3 | 1 |
| Case 95 | 3 | 48,561,003 | 49,641,049 | 2 | 0 | 2 | 1 |
| Case 95 | 3 | 49,656,789 | 49,698,130 | 1 | 0 | 1 | 0 |
| Case 95 | 3 | 49,698,316 | 49,731,861 | 2 | 0 | 2 | 1 |
| Case 95 | 3 | 49,735,541 | 49,756,129 | 1 | 0 | 1 | 0 |
| Case 95 | 3 | 49,756,304 | 49,792,023 | 2 | 0 | 2 | 1 |
| Case 95 | 3 | 49,831,032 | 49,940,207 | 1 | 0 | 1 | 0 |
| Case 95 | 3 | 49,940,238 | 50,114,450 | 2 | 0 | 2 | 1 |
| Case 95 | 3 | 50,123,417 | 50,655,190 | 3 | 0 | 3 | 1 |
| Case 95 | 3 | 50,657,826 | 51,968,725 | 1 | 0 | 1 | 0 |
| Case 95 | 3 | 51,968,775 | 51,981,894 | 2 | 0 | 2 | 1 |
| Case 95 | 3 | 51,982,251 | 52,391,993 | 1 | 0 | 1 | 0 |
| Case 95 | 3 | 52,392,595 | 52,522,297 | 2 | 0 | 2 | 1 |
| Case 95 | 3 | 52,522,591 | 52,556,651 | 1 | 0 | 1 | 0 |
| Case 95 | 3 | 52,557,059 | 52,597,433 | 2 | 0 | 2 | 1 |
| Case 95 | 3 | 52,607,288 | 52,799,944 | 1 | 0 | 1 | 0 |
| Case 95 | 3 | 52,800,284 | 52,936,763 | 2 | 0 | 2 | 1 |
| Case 95 | 3 | 52,937,774 | 53,126,016 | 1 | 0 | 1 | 0 |
| Case 95 | 3 | 53,126,443 | 53,286,688 | 2 | 0 | 2 | 1 |
| Case 95 | 3 | 53,289,527 | 53,610,101 | 1 | 0 | 1 | 0 |
| Case 95 | 3 | 53,614,484 | 54,243,646 | 2 | 0 | 2 | 1 |
| Case 95 | 3 | 54,245,774 | 55,261,956 | 1 | 0 | 1 | 0 |
| Case 95 | 3 | 55,262,928 | 55,274,426 | 2 | 0 | 2 | 1 |
| Case 95 | 3 | 55,274,566 | 55,918,352 | 1 | 0 | 1 | 0 |
| Case 95 | 3 | 55,922,456 | 55,969,858 | 2 | 0 | 2 | 1 |
| Case 95 | 3 | 55,976,133 | 58,512,375 | 1 | 0 | 1 | 0 |
| Case 95 | 3 | 58,512,384 | 58,520,737 | 2 | 0 | 2 | 1 |
| Case 95 | 3 | 58,520,859 | 59,452,272 | 1 | 0 | 1 | 0 |
| Case 95 | 3 | 59,452,332 | 59,737,969 | 2 | 0 | 2 | 1 |
| Case 95 | 3 | 59,737,975 | 60,305,117 | 1 | 0 | 1 | 0 |
| Case 95 | 3 | 60,306,891 | 60,506,349 | 0 | 0 | 0 | 0 |
| Case 95 | 3 | 60,511,133 | 63,580,540 | 1 | 0 | 1 | 0 |
| Case 95 | 3 | 63,583,133 | 63,792,326 | 2 | 0 | 2 | 1 |
| Case 95 | 3 | 63,813,654 | 64,501,698 | 1 | 0 | 1 | 0 |
| Case 95 | 3 | 64,505,542 | 65,077,476 | 2 | 0 | 2 | 1 |
| Case 95 | 3 | 65,077,900 | 65,286,403 | 1 | 0 | 1 | 0 |
| Case 95 | 3 | 65,289,469 | 65,376,819 | 2 | 0 | 2 | 1 |
| Case 95 | 3 | 65,376,936 | 66,419,502 | 1 | 0 | 1 | 0 |
| Case 95 | 3 | 66,419,956 | 66,823,237 | 2 | 0 | 2 | 1 |
| Case 95 | 3 | 66,833,437 | 70,973,305 | 1 | 0 | 1 | 0 |
| Case 95 | 3 | 70,976,765 | 71,095,829 | 2 | 0 | 2 | 1 |
| Case 95 | 3 | 71,096,114 | 71,670,465 | 1 | 0 | 1 | 0 |

|         |   |             |             |   |   |   |   |
|---------|---|-------------|-------------|---|---|---|---|
| Case 95 | 3 | 71,672,306  | 72,210,171  | 2 | 0 | 2 | 1 |
| Case 95 | 3 | 72,210,920  | 72,629,854  | 1 | 0 | 1 | 0 |
| Case 95 | 3 | 72,635,104  | 72,682,319  | 2 | 0 | 2 | 1 |
| Case 95 | 3 | 72,683,651  | 73,572,544  | 1 | 0 | 1 | 0 |
| Case 95 | 3 | 73,573,216  | 73,883,107  | 2 | 0 | 2 | 1 |
| Case 95 | 3 | 73,887,678  | 75,209,574  | 1 | 0 | 1 | 0 |
| Case 95 | 3 | 75,222,937  | 75,561,341  | 2 | 0 | 2 | 1 |
| Case 95 | 3 | 75,605,157  | 85,570,561  | 1 | 0 | 1 | 0 |
| Case 95 | 3 | 85,577,752  | 86,654,296  | 2 | 0 | 2 | 1 |
| Case 95 | 3 | 86,654,664  | 89,270,738  | 1 | 0 | 1 | 0 |
| Case 95 | 3 | 89,271,087  | 89,675,870  | 2 | 0 | 2 | 1 |
| Case 95 | 3 | 89,686,064  | 90,442,925  | 1 | 0 | 1 | 0 |
| Case 95 | 3 | 93,537,290  | 95,177,386  | 2 | 1 | 3 | 0 |
| Case 95 | 3 | 95,186,258  | 95,186,258  | 3 | 1 | 4 | 0 |
| Case 95 | 3 | 95,225,762  | 95,625,994  | 3 | 2 | 5 | 0 |
| Case 95 | 3 | 95,633,649  | 119,822,335 | 2 | 1 | 3 | 0 |
| Case 95 | 3 | 119,824,037 | 120,152,222 | 3 | 1 | 4 | 0 |
| Case 95 | 3 | 120,154,181 | 122,894,253 | 2 | 1 | 3 | 0 |
| Case 95 | 3 | 122,894,688 | 123,229,780 | 3 | 1 | 4 | 0 |
| Case 95 | 3 | 123,232,693 | 128,242,205 | 2 | 1 | 3 | 0 |
| Case 95 | 3 | 128,243,631 | 128,532,174 | 3 | 1 | 4 | 0 |
| Case 95 | 3 | 128,532,471 | 128,908,494 | 1 | 1 | 2 | 0 |
| Case 95 | 3 | 128,915,591 | 172,202,999 | 2 | 1 | 3 | 0 |
| Case 95 | 3 | 172,206,961 | 172,314,227 | 3 | 1 | 4 | 0 |
| Case 95 | 3 | 172,314,679 | 174,131,106 | 2 | 1 | 3 | 0 |
| Case 95 | 3 | 174,136,298 | 174,231,077 | 2 | 0 | 2 | 1 |
| Case 95 | 3 | 174,241,461 | 193,363,535 | 2 | 1 | 3 | 0 |
| Case 95 | 3 | 193,365,544 | 193,809,078 | 2 | 2 | 4 | 0 |
| Case 95 | 3 | 193,811,162 | 194,238,889 | 2 | 1 | 3 | 0 |
| Case 95 | 3 | 194,244,722 | 195,192,088 | 1 | 1 | 2 | 0 |
| Case 95 | 3 | 195,238,559 | 195,515,996 | 1 | 0 | 1 | 0 |
| Case 95 | 3 | 195,516,305 | 195,518,330 | 2 | 0 | 2 | 1 |
| Case 95 | 3 | 195,519,857 | 196,767,854 | 1 | 0 | 1 | 0 |
| Case 95 | 3 | 196,769,797 | 196,792,663 | 2 | 1 | 3 | 0 |
| Case 95 | 3 | 196,793,858 | 197,838,262 | 1 | 0 | 1 | 0 |
| Case 95 | 4 | 71,566      | 75,174      | 2 | 1 | 3 | 0 |
| Case 95 | 4 | 85,422      | 473,952     | 2 | 2 | 4 | 0 |
| Case 95 | 4 | 492,129     | 628,493     | 2 | 1 | 3 | 0 |
| Case 95 | 4 | 628,589     | 860,768     | 2 | 2 | 4 | 0 |
| Case 95 | 4 | 860,986     | 1,635,312   | 2 | 1 | 3 | 0 |
| Case 95 | 4 | 1,641,578   | 1,737,468   | 2 | 2 | 4 | 0 |
| Case 95 | 4 | 1,737,502   | 1,818,625   | 4 | 1 | 5 | 0 |
| Case 95 | 4 | 1,821,141   | 1,994,985   | 2 | 2 | 4 | 0 |
| Case 95 | 4 | 2,054,373   | 2,734,859   | 2 | 1 | 3 | 0 |
| Case 95 | 4 | 2,743,983   | 3,109,012   | 2 | 2 | 4 | 0 |
| Case 95 | 4 | 3,109,095   | 3,780,072   | 3 | 1 | 4 | 0 |
| Case 95 | 4 | 3,787,202   | 4,638,578   | 2 | 1 | 3 | 0 |
| Case 95 | 4 | 4,645,158   | 5,461,058   | 3 | 1 | 4 | 0 |
| Case 95 | 4 | 5,461,848   | 6,086,752   | 2 | 1 | 3 | 0 |
| Case 95 | 4 | 6,088,956   | 6,259,236   | 3 | 1 | 4 | 0 |
| Case 95 | 4 | 6,261,776   | 32,953,000  | 2 | 1 | 3 | 0 |
| Case 95 | 4 | 32,958,989  | 33,745,441  | 2 | 2 | 4 | 0 |
| Case 95 | 4 | 33,747,424  | 34,348,739  | 2 | 1 | 3 | 0 |
| Case 95 | 4 | 34,356,554  | 44,964,929  | 1 | 1 | 2 | 0 |
| Case 95 | 4 | 44,976,703  | 45,995,759  | 1 | 0 | 1 | 0 |
| Case 95 | 4 | 46,025,913  | 46,734,901  | 1 | 1 | 2 | 0 |
| Case 95 | 4 | 46,737,040  | 46,929,104  | 1 | 0 | 1 | 0 |
| Case 95 | 4 | 46,930,390  | 47,109,360  | 1 | 1 | 2 | 0 |
| Case 95 | 4 | 47,132,261  | 47,739,293  | 1 | 0 | 1 | 0 |
| Case 95 | 4 | 47,742,275  | 49,553,810  | 1 | 1 | 2 | 0 |
| Case 95 | 4 | 49,617,483  | 49,620,898  | 2 | 1 | 3 | 0 |

|         |   |             |             |   |   |   |   |
|---------|---|-------------|-------------|---|---|---|---|
| Case 95 | 4 | 52,697,856  | 53,965,247  | 2 | 1 | 3 | 0 |
| Case 95 | 4 | 53,980,677  | 55,011,123  | 1 | 1 | 2 | 0 |
| Case 95 | 4 | 55,016,097  | 57,892,643  | 2 | 1 | 3 | 0 |
| Case 95 | 4 | 57,897,491  | 83,115,904  | 1 | 1 | 2 | 0 |
| Case 95 | 4 | 83,130,688  | 83,576,973  | 2 | 1 | 3 | 0 |
| Case 95 | 4 | 83,582,064  | 100,194,977 | 1 | 1 | 2 | 0 |
| Case 95 | 4 | 100,195,815 | 100,444,684 | 2 | 1 | 3 | 0 |
| Case 95 | 4 | 100,451,051 | 169,828,862 | 1 | 1 | 2 | 0 |
| Case 95 | 4 | 169,835,150 | 170,145,050 | 2 | 1 | 3 | 0 |
| Case 95 | 4 | 170,146,632 | 185,227,184 | 1 | 1 | 2 | 0 |
| Case 95 | 4 | 185,234,505 | 185,234,505 | 2 | 0 | 2 | 1 |
| Case 95 | 4 | 185,238,400 | 185,273,483 | 5 | 0 | 5 | 1 |
| Case 95 | 4 | 185,278,885 | 185,280,853 | 2 | 1 | 3 | 0 |
| Case 95 | 4 | 185,284,684 | 190,963,766 | 1 | 1 | 2 | 0 |
| Case 95 | 5 | 38,139      | 314,935     | 2 | 1 | 3 | 0 |
| Case 95 | 5 | 336,952     | 464,477     | 3 | 1 | 4 | 0 |
| Case 95 | 5 | 475,076     | 14,538,192  | 2 | 1 | 3 | 0 |
| Case 95 | 5 | 14,539,821  | 14,621,711  | 3 | 1 | 4 | 0 |
| Case 95 | 5 | 14,628,180  | 32,724,806  | 2 | 1 | 3 | 0 |
| Case 95 | 5 | 32,724,875  | 32,733,968  | 2 | 2 | 4 | 0 |
| Case 95 | 5 | 32,734,327  | 33,011,986  | 4 | 1 | 5 | 0 |
| Case 95 | 5 | 33,017,254  | 33,223,220  | 2 | 2 | 4 | 0 |
| Case 95 | 5 | 33,223,956  | 34,123,933  | 3 | 1 | 4 | 0 |
| Case 95 | 5 | 34,166,261  | 34,559,175  | 2 | 1 | 3 | 0 |
| Case 95 | 5 | 34,564,835  | 34,845,722  | 2 | 2 | 4 | 0 |
| Case 95 | 5 | 34,845,748  | 35,089,765  | 2 | 1 | 3 | 0 |
| Case 95 | 5 | 35,091,622  | 35,910,419  | 2 | 2 | 4 | 0 |
| Case 95 | 5 | 35,910,529  | 36,049,244  | 2 | 1 | 3 | 0 |
| Case 95 | 5 | 36,049,416  | 36,926,756  | 2 | 2 | 4 | 0 |
| Case 95 | 5 | 36,927,652  | 39,087,074  | 2 | 1 | 3 | 0 |
| Case 95 | 5 | 39,098,803  | 39,210,719  | 2 | 2 | 4 | 0 |
| Case 95 | 5 | 39,211,189  | 39,898,872  | 2 | 1 | 3 | 0 |
| Case 95 | 5 | 39,907,157  | 40,287,885  | 2 | 2 | 4 | 0 |
| Case 95 | 5 | 40,288,878  | 41,018,868  | 2 | 1 | 3 | 0 |
| Case 95 | 5 | 41,019,002  | 41,070,247  | 2 | 2 | 4 | 0 |
| Case 95 | 5 | 41,070,840  | 41,161,919  | 2 | 1 | 3 | 0 |
| Case 95 | 5 | 41,167,574  | 42,523,172  | 2 | 2 | 4 | 0 |
| Case 95 | 5 | 42,547,255  | 43,562,931  | 3 | 1 | 4 | 0 |
| Case 95 | 5 | 43,577,190  | 43,619,171  | 2 | 1 | 3 | 0 |
| Case 95 | 5 | 43,628,052  | 44,442,578  | 2 | 2 | 4 | 0 |
| Case 95 | 5 | 44,447,093  | 45,998,686  | 2 | 1 | 3 | 0 |
| Case 95 | 5 | 46,019,244  | 46,399,093  | 1 | 0 | 1 | 0 |
| Case 95 | 5 | 49,457,282  | 51,724,318  | 1 | 0 | 1 | 0 |
| Case 95 | 5 | 51,733,627  | 52,141,943  | 1 | 1 | 2 | 0 |
| Case 95 | 5 | 52,153,066  | 52,752,242  | 3 | 1 | 4 | 0 |
| Case 95 | 5 | 52,755,604  | 54,275,243  | 1 | 0 | 1 | 0 |
| Case 95 | 5 | 54,277,826  | 54,424,263  | 2 | 0 | 2 | 1 |
| Case 95 | 5 | 54,424,296  | 56,988,506  | 1 | 0 | 1 | 0 |
| Case 95 | 5 | 57,004,423  | 58,197,893  | 3 | 1 | 4 | 0 |
| Case 95 | 5 | 58,201,950  | 58,446,582  | 1 | 0 | 1 | 0 |
| Case 95 | 5 | 58,448,733  | 59,064,277  | 2 | 0 | 2 | 1 |
| Case 95 | 5 | 59,073,475  | 59,311,463  | 0 | 0 | 0 | 0 |
| Case 95 | 5 | 59,322,616  | 60,800,336  | 1 | 0 | 1 | 0 |
| Case 95 | 5 | 60,806,765  | 61,161,048  | 2 | 0 | 2 | 1 |
| Case 95 | 5 | 61,165,626  | 64,858,380  | 1 | 0 | 1 | 0 |
| Case 95 | 5 | 64,859,234  | 72,573,021  | 1 | 1 | 2 | 0 |
| Case 95 | 5 | 72,578,131  | 72,815,787  | 2 | 1 | 3 | 0 |
| Case 95 | 5 | 72,818,878  | 72,954,453  | 3 | 1 | 4 | 0 |
| Case 95 | 5 | 72,979,253  | 74,965,122  | 1 | 1 | 2 | 0 |
| Case 95 | 5 | 74,967,386  | 75,034,387  | 1 | 0 | 1 | 0 |
| Case 95 | 5 | 75,040,180  | 75,230,527  | 2 | 0 | 2 | 1 |

|         |   |             |             |   |   |   |   |
|---------|---|-------------|-------------|---|---|---|---|
| Case 95 | 5 | 75,235,544  | 75,445,925  | 1 | 0 | 1 | 0 |
| Case 95 | 5 | 75,446,430  | 75,515,187  | 2 | 0 | 2 | 1 |
| Case 95 | 5 | 75,518,746  | 76,701,739  | 1 | 0 | 1 | 0 |
| Case 95 | 5 | 76,703,226  | 76,722,443  | 2 | 0 | 2 | 1 |
| Case 95 | 5 | 76,722,816  | 77,684,726  | 1 | 0 | 1 | 0 |
| Case 95 | 5 | 77,711,356  | 78,268,128  | 2 | 0 | 2 | 1 |
| Case 95 | 5 | 78,268,889  | 79,030,638  | 1 | 0 | 1 | 0 |
| Case 95 | 5 | 79,030,797  | 79,039,740  | 2 | 0 | 2 | 1 |
| Case 95 | 5 | 79,041,057  | 79,627,154  | 1 | 0 | 1 | 0 |
| Case 95 | 5 | 79,630,844  | 81,946,255  | 1 | 1 | 2 | 0 |
| Case 95 | 5 | 81,951,284  | 82,422,643  | 2 | 1 | 3 | 0 |
| Case 95 | 5 | 82,436,811  | 82,824,115  | 1 | 1 | 2 | 0 |
| Case 95 | 5 | 82,826,254  | 83,629,549  | 2 | 1 | 3 | 0 |
| Case 95 | 5 | 83,632,691  | 84,242,662  | 1 | 1 | 2 | 0 |
| Case 95 | 5 | 84,248,966  | 89,979,523  | 1 | 0 | 1 | 0 |
| Case 95 | 5 | 89,979,568  | 89,985,795  | 2 | 0 | 2 | 1 |
| Case 95 | 5 | 89,985,882  | 95,685,235  | 1 | 0 | 1 | 0 |
| Case 95 | 5 | 95,705,529  | 95,965,857  | 2 | 0 | 2 | 1 |
| Case 95 | 5 | 95,969,322  | 101,959,192 | 1 | 0 | 1 | 0 |
| Case 95 | 5 | 101,979,155 | 102,326,054 | 2 | 0 | 2 | 1 |
| Case 95 | 5 | 102,328,190 | 112,458,479 | 1 | 0 | 1 | 0 |
| Case 95 | 5 | 112,458,489 | 112,635,794 | 2 | 0 | 2 | 1 |
| Case 95 | 5 | 112,641,650 | 115,788,104 | 1 | 0 | 1 | 0 |
| Case 95 | 5 | 115,788,412 | 115,837,961 | 2 | 0 | 2 | 1 |
| Case 95 | 5 | 115,840,528 | 116,672,520 | 1 | 0 | 1 | 0 |
| Case 95 | 5 | 116,680,760 | 131,995,150 | 1 | 1 | 2 | 0 |
| Case 95 | 5 | 131,995,423 | 132,109,742 | 2 | 1 | 3 | 0 |
| Case 95 | 5 | 132,111,043 | 132,184,432 | 1 | 1 | 2 | 0 |
| Case 95 | 5 | 132,196,383 | 132,270,228 | 2 | 1 | 3 | 0 |
| Case 95 | 5 | 132,270,285 | 139,930,726 | 1 | 1 | 2 | 0 |
| Case 95 | 5 | 139,930,736 | 139,931,652 | 1 | 0 | 1 | 0 |
| Case 95 | 5 | 139,931,653 | 140,188,702 | 1 | 1 | 2 | 0 |
| Case 95 | 5 | 140,192,643 | 140,306,559 | 1 | 0 | 1 | 0 |
| Case 95 | 5 | 140,306,929 | 140,308,591 | 2 | 0 | 2 | 1 |
| Case 95 | 5 | 140,308,620 | 140,366,901 | 1 | 0 | 1 | 0 |
| Case 95 | 5 | 140,368,859 | 140,588,918 | 2 | 0 | 2 | 1 |
| Case 95 | 5 | 140,589,016 | 140,711,120 | 1 | 0 | 1 | 0 |
| Case 95 | 5 | 140,711,595 | 140,890,616 | 2 | 0 | 2 | 1 |
| Case 95 | 5 | 140,892,643 | 141,030,926 | 1 | 0 | 1 | 0 |
| Case 95 | 5 | 141,031,554 | 141,075,430 | 2 | 0 | 2 | 1 |
| Case 95 | 5 | 141,079,168 | 141,189,817 | 1 | 0 | 1 | 0 |
| Case 95 | 5 | 141,191,724 | 141,304,248 | 2 | 0 | 2 | 1 |
| Case 95 | 5 | 141,304,989 | 141,642,872 | 1 | 0 | 1 | 0 |
| Case 95 | 5 | 141,642,966 | 141,894,557 | 2 | 0 | 2 | 1 |
| Case 95 | 5 | 141,901,900 | 142,221,460 | 4 | 0 | 4 | 1 |
| Case 95 | 5 | 142,228,026 | 148,408,245 | 2 | 0 | 2 | 1 |
| Case 95 | 5 | 148,410,920 | 148,627,448 | 3 | 0 | 3 | 1 |
| Case 95 | 5 | 148,630,961 | 150,400,601 | 2 | 0 | 2 | 1 |
| Case 95 | 5 | 150,400,878 | 150,722,459 | 3 | 0 | 3 | 1 |
| Case 95 | 5 | 150,722,504 | 153,883,392 | 2 | 0 | 2 | 1 |
| Case 95 | 5 | 153,884,609 | 156,418,790 | 2 | 1 | 3 | 0 |
| Case 95 | 5 | 156,419,765 | 156,563,909 | 1 | 1 | 2 | 0 |
| Case 95 | 5 | 156,564,882 | 179,675,974 | 2 | 1 | 3 | 0 |
| Case 95 | 5 | 179,676,661 | 179,763,789 | 1 | 1 | 2 | 0 |
| Case 95 | 5 | 179,765,467 | 179,877,022 | 2 | 1 | 3 | 0 |
| Case 95 | 5 | 179,881,433 | 180,057,231 | 1 | 1 | 2 | 0 |
| Case 95 | 5 | 180,057,650 | 180,693,127 | 2 | 1 | 3 | 0 |
| Case 95 | 6 | 108,666     | 1,712,283   | 2 | 1 | 3 | 0 |
| Case 95 | 6 | 1,712,306   | 1,760,556   | 1 | 0 | 1 | 0 |
| Case 95 | 6 | 1,763,561   | 2,106,309   | 0 | 0 | 0 | 0 |
| Case 95 | 6 | 2,111,091   | 27,645,278  | 2 | 1 | 3 | 0 |

|         |   |            |            |   |   |   |   |
|---------|---|------------|------------|---|---|---|---|
| Case 95 | 6 | 27,646,100 | 27,879,281 | 1 | 1 | 2 | 0 |
| Case 95 | 6 | 27,879,289 | 30,633,875 | 2 | 1 | 3 | 0 |
| Case 95 | 6 | 30,635,593 | 30,838,497 | 2 | 2 | 4 | 0 |
| Case 95 | 6 | 30,838,688 | 30,876,411 | 2 | 1 | 3 | 0 |
| Case 95 | 6 | 30,877,202 | 30,986,396 | 2 | 2 | 4 | 0 |
| Case 95 | 6 | 30,986,527 | 31,000,005 | 2 | 1 | 3 | 0 |
| Case 95 | 6 | 31,000,489 | 31,082,361 | 2 | 2 | 4 | 0 |
| Case 95 | 6 | 31,082,404 | 31,140,152 | 2 | 1 | 3 | 0 |
| Case 95 | 6 | 31,140,532 | 31,218,984 | 2 | 2 | 4 | 0 |
| Case 95 | 6 | 31,219,869 | 31,219,869 | 2 | 1 | 3 | 0 |
| Case 95 | 6 | 31,221,039 | 31,221,914 | 0 | 0 | 0 | 0 |
| Case 95 | 6 | 31,230,701 | 31,244,520 | 2 | 1 | 3 | 0 |
| Case 95 | 6 | 31,244,789 | 31,321,685 | 2 | 2 | 4 | 0 |
| Case 95 | 6 | 31,322,277 | 31,383,071 | 2 | 1 | 3 | 0 |
| Case 95 | 6 | 31,383,979 | 31,690,009 | 2 | 2 | 4 | 0 |
| Case 95 | 6 | 31,691,508 | 31,783,507 | 3 | 1 | 4 | 0 |
| Case 95 | 6 | 31,785,453 | 31,795,550 | 1 | 0 | 1 | 0 |
| Case 95 | 6 | 31,798,287 | 31,888,869 | 3 | 1 | 4 | 0 |
| Case 95 | 6 | 31,892,484 | 32,057,627 | 2 | 1 | 3 | 0 |
| Case 95 | 6 | 32,058,167 | 32,097,983 | 3 | 1 | 4 | 0 |
| Case 95 | 6 | 32,100,077 | 32,205,110 | 2 | 1 | 3 | 0 |
| Case 95 | 6 | 32,205,942 | 32,367,997 | 2 | 2 | 4 | 0 |
| Case 95 | 6 | 32,368,087 | 32,375,352 | 2 | 1 | 3 | 0 |
| Case 95 | 6 | 32,375,745 | 32,438,598 | 2 | 2 | 4 | 0 |
| Case 95 | 6 | 32,439,323 | 32,609,105 | 2 | 1 | 3 | 0 |
| Case 95 | 6 | 32,609,126 | 32,985,376 | 2 | 2 | 4 | 0 |
| Case 95 | 6 | 32,985,992 | 33,125,858 | 3 | 2 | 5 | 0 |
| Case 95 | 6 | 33,127,757 | 33,477,013 | 2 | 1 | 3 | 0 |
| Case 95 | 6 | 33,478,496 | 34,143,292 | 2 | 2 | 4 | 0 |
| Case 95 | 6 | 34,153,441 | 34,254,178 | 2 | 1 | 3 | 0 |
| Case 95 | 6 | 34,255,631 | 34,563,164 | 2 | 2 | 4 | 0 |
| Case 95 | 6 | 34,569,814 | 35,479,574 | 2 | 1 | 3 | 0 |
| Case 95 | 6 | 35,480,010 | 36,282,889 | 2 | 2 | 4 | 0 |
| Case 95 | 6 | 36,287,134 | 36,656,256 | 2 | 1 | 3 | 0 |
| Case 95 | 6 | 36,658,742 | 36,727,212 | 2 | 2 | 4 | 0 |
| Case 95 | 6 | 36,729,567 | 37,321,972 | 2 | 1 | 3 | 0 |
| Case 95 | 6 | 37,324,857 | 38,946,459 | 2 | 2 | 4 | 0 |
| Case 95 | 6 | 38,947,930 | 39,163,744 | 2 | 1 | 3 | 0 |
| Case 95 | 6 | 39,164,121 | 39,796,910 | 2 | 2 | 4 | 0 |
| Case 95 | 6 | 39,800,014 | 40,594,841 | 2 | 1 | 3 | 0 |
| Case 95 | 6 | 40,595,071 | 41,318,438 | 2 | 2 | 4 | 0 |
| Case 95 | 6 | 41,318,587 | 41,603,194 | 3 | 2 | 5 | 0 |
| Case 95 | 6 | 41,605,830 | 41,729,406 | 2 | 2 | 4 | 0 |
| Case 95 | 6 | 41,731,177 | 42,039,572 | 2 | 1 | 3 | 0 |
| Case 95 | 6 | 42,039,666 | 42,126,444 | 2 | 2 | 4 | 0 |
| Case 95 | 6 | 42,126,529 | 42,271,906 | 2 | 1 | 3 | 0 |
| Case 95 | 6 | 42,277,196 | 42,671,099 | 2 | 2 | 4 | 0 |
| Case 95 | 6 | 42,672,150 | 43,422,536 | 2 | 1 | 3 | 0 |
| Case 95 | 6 | 43,423,647 | 47,277,181 | 2 | 2 | 4 | 0 |
| Case 95 | 6 | 47,287,769 | 47,541,940 | 4 | 1 | 5 | 0 |
| Case 95 | 6 | 47,547,820 | 52,266,511 | 2 | 2 | 4 | 0 |
| Case 95 | 6 | 52,268,008 | 52,453,220 | 2 | 1 | 3 | 0 |
| Case 95 | 6 | 52,454,094 | 53,123,118 | 2 | 2 | 4 | 0 |
| Case 95 | 6 | 53,124,501 | 53,564,059 | 2 | 1 | 3 | 0 |
| Case 95 | 6 | 53,564,752 | 54,054,686 | 2 | 2 | 4 | 0 |
| Case 95 | 6 | 54,054,699 | 55,004,835 | 2 | 1 | 3 | 0 |
| Case 95 | 6 | 55,006,253 | 56,215,930 | 2 | 2 | 4 | 0 |
| Case 95 | 6 | 56,217,207 | 56,347,519 | 2 | 1 | 3 | 0 |
| Case 95 | 6 | 56,351,972 | 57,063,946 | 2 | 2 | 4 | 0 |
| Case 95 | 6 | 57,068,940 | 58,752,089 | 2 | 1 | 3 | 0 |
| Case 95 | 6 | 61,891,118 | 65,584,763 | 2 | 1 | 3 | 0 |

|         |   |             |             |   |   |   |   |
|---------|---|-------------|-------------|---|---|---|---|
| Case 95 | 6 | 65,586,419  | 107,272,331 | 1 | 1 | 2 | 0 |
| Case 95 | 6 | 107,288,708 | 107,383,411 | 2 | 1 | 3 | 0 |
| Case 95 | 6 | 107,386,233 | 108,791,307 | 1 | 1 | 2 | 0 |
| Case 95 | 6 | 108,798,097 | 109,221,846 | 2 | 1 | 3 | 0 |
| Case 95 | 6 | 109,233,725 | 109,461,506 | 1 | 1 | 2 | 0 |
| Case 95 | 6 | 109,466,452 | 109,751,601 | 3 | 1 | 4 | 0 |
| Case 95 | 6 | 109,752,426 | 109,828,474 | 2 | 1 | 3 | 0 |
| Case 95 | 6 | 109,832,034 | 111,843,548 | 1 | 1 | 2 | 0 |
| Case 95 | 6 | 111,845,111 | 112,175,517 | 2 | 1 | 3 | 0 |
| Case 95 | 6 | 112,175,735 | 117,772,143 | 1 | 1 | 2 | 0 |
| Case 95 | 6 | 117,781,803 | 118,642,751 | 2 | 1 | 3 | 0 |
| Case 95 | 6 | 118,645,767 | 119,433,241 | 1 | 1 | 2 | 0 |
| Case 95 | 6 | 119,434,014 | 120,233,977 | 2 | 1 | 3 | 0 |
| Case 95 | 6 | 120,244,785 | 125,658,409 | 1 | 1 | 2 | 0 |
| Case 95 | 6 | 125,672,037 | 132,945,355 | 2 | 1 | 3 | 0 |
| Case 95 | 6 | 132,951,025 | 133,070,928 | 3 | 1 | 4 | 0 |
| Case 95 | 6 | 133,070,995 | 162,392,902 | 2 | 1 | 3 | 0 |
| Case 95 | 6 | 162,394,341 | 162,447,612 | 1 | 1 | 2 | 0 |
| Case 95 | 6 | 162,450,471 | 162,841,979 | 1 | 0 | 1 | 0 |
| Case 95 | 6 | 162,847,889 | 162,925,492 | 3 | 0 | 3 | 1 |
| Case 95 | 6 | 162,927,803 | 162,995,680 | 2 | 1 | 3 | 0 |
| Case 95 | 6 | 162,996,263 | 165,588,629 | 2 | 2 | 4 | 0 |
| Case 95 | 6 | 165,590,516 | 165,831,225 | 2 | 1 | 3 | 0 |
| Case 95 | 6 | 165,831,491 | 165,933,673 | 2 | 2 | 4 | 0 |
| Case 95 | 6 | 165,935,421 | 166,796,433 | 2 | 1 | 3 | 0 |
| Case 95 | 6 | 166,799,022 | 169,444,202 | 2 | 2 | 4 | 0 |
| Case 95 | 6 | 169,447,055 | 169,642,042 | 2 | 1 | 3 | 0 |
| Case 95 | 6 | 169,643,685 | 170,002,347 | 2 | 2 | 4 | 0 |
| Case 95 | 6 | 170,002,365 | 170,105,270 | 2 | 1 | 3 | 0 |
| Case 95 | 6 | 170,105,313 | 170,552,613 | 2 | 2 | 4 | 0 |
| Case 95 | 6 | 170,554,506 | 170,980,171 | 2 | 1 | 3 | 0 |
| Case 95 | 7 | 44,935      | 4,820,940   | 2 | 1 | 3 | 0 |
| Case 95 | 7 | 4,821,257   | 4,855,862   | 1 | 1 | 2 | 0 |
| Case 95 | 7 | 4,855,934   | 16,704,191  | 2 | 1 | 3 | 0 |
| Case 95 | 7 | 16,704,212  | 16,776,509  | 2 | 2 | 4 | 0 |
| Case 95 | 7 | 16,777,700  | 16,886,964  | 4 | 1 | 5 | 0 |
| Case 95 | 7 | 16,889,926  | 16,890,982  | 2 | 2 | 4 | 0 |
| Case 95 | 7 | 16,895,475  | 17,296,072  | 3 | 2 | 5 | 0 |
| Case 95 | 7 | 17,300,695  | 22,268,760  | 2 | 1 | 3 | 0 |
| Case 95 | 7 | 22,269,345  | 22,602,932  | 3 | 1 | 4 | 0 |
| Case 95 | 7 | 22,604,319  | 30,182,813  | 2 | 1 | 3 | 0 |
| Case 95 | 7 | 30,185,796  | 30,299,645  | 1 | 1 | 2 | 0 |
| Case 95 | 7 | 30,318,912  | 32,843,795  | 2 | 1 | 3 | 0 |
| Case 95 | 7 | 32,854,040  | 33,133,742  | 1 | 1 | 2 | 0 |
| Case 95 | 7 | 33,136,109  | 33,733,587  | 2 | 1 | 3 | 0 |
| Case 95 | 7 | 33,738,345  | 34,021,755  | 1 | 1 | 2 | 0 |
| Case 95 | 7 | 34,035,784  | 36,079,709  | 2 | 1 | 3 | 0 |
| Case 95 | 7 | 36,083,679  | 39,595,948  | 2 | 2 | 4 | 0 |
| Case 95 | 7 | 39,605,204  | 40,174,711  | 2 | 1 | 3 | 0 |
| Case 95 | 7 | 40,193,535  | 42,001,171  | 2 | 2 | 4 | 0 |
| Case 95 | 7 | 42,003,500  | 42,236,334  | 2 | 1 | 3 | 0 |
| Case 95 | 7 | 42,240,694  | 42,657,424  | 2 | 2 | 4 | 0 |
| Case 95 | 7 | 42,662,187  | 43,108,258  | 2 | 1 | 3 | 0 |
| Case 95 | 7 | 43,125,022  | 43,595,400  | 2 | 2 | 4 | 0 |
| Case 95 | 7 | 43,598,222  | 44,157,322  | 2 | 1 | 3 | 0 |
| Case 95 | 7 | 44,159,224  | 44,925,896  | 2 | 2 | 4 | 0 |
| Case 95 | 7 | 44,932,538  | 46,027,518  | 2 | 1 | 3 | 0 |
| Case 95 | 7 | 46,028,577  | 47,690,398  | 2 | 2 | 4 | 0 |
| Case 95 | 7 | 47,691,429  | 47,979,922  | 2 | 1 | 3 | 0 |
| Case 95 | 7 | 47,981,235  | 49,127,859  | 2 | 2 | 4 | 0 |
| Case 95 | 7 | 49,145,008  | 49,803,095  | 4 | 1 | 5 | 0 |



|         |   |             |             |   |   |   |   |
|---------|---|-------------|-------------|---|---|---|---|
| Case 95 | 7 | 49,808,395  | 50,417,522  | 2 | 2 | 4 | 0 |
| Case 95 | 7 | 50,418,242  | 50,531,994  | 2 | 1 | 3 | 0 |
| Case 95 | 7 | 50,535,395  | 52,287,973  | 2 | 2 | 4 | 0 |
| Case 95 | 7 | 52,292,676  | 52,521,444  | 2 | 1 | 3 | 0 |
| Case 95 | 7 | 52,525,336  | 53,036,443  | 2 | 2 | 4 | 0 |
| Case 95 | 7 | 53,037,887  | 53,162,595  | 2 | 1 | 3 | 0 |
| Case 95 | 7 | 53,165,642  | 55,229,543  | 2 | 2 | 4 | 0 |
| Case 95 | 7 | 55,230,840  | 58,019,061  | 2 | 1 | 3 | 0 |
| Case 95 | 7 | 61,056,053  | 63,156,419  | 2 | 1 | 3 | 0 |
| Case 95 | 7 | 63,189,965  | 64,030,116  | 1 | 1 | 2 | 0 |
| Case 95 | 7 | 64,054,804  | 64,679,561  | 1 | 0 | 1 | 0 |
| Case 95 | 7 | 64,696,330  | 64,941,887  | 2 | 1 | 3 | 0 |
| Case 95 | 7 | 64,956,181  | 65,420,340  | 1 | 1 | 2 | 0 |
| Case 95 | 7 | 65,424,658  | 65,796,626  | 1 | 0 | 1 | 0 |
| Case 95 | 7 | 65,822,360  | 66,304,423  | 1 | 1 | 2 | 0 |
| Case 95 | 7 | 66,315,976  | 71,982,924  | 1 | 0 | 1 | 0 |
| Case 95 | 7 | 72,073,716  | 72,721,449  | 2 | 1 | 3 | 0 |
| Case 95 | 7 | 72,722,981  | 73,491,212  | 1 | 0 | 1 | 0 |
| Case 95 | 7 | 73,493,533  | 75,179,843  | 1 | 1 | 2 | 0 |
| Case 95 | 7 | 75,180,033  | 76,131,706  | 2 | 1 | 3 | 0 |
| Case 95 | 7 | 76,132,073  | 98,648,560  | 1 | 1 | 2 | 0 |
| Case 95 | 7 | 98,648,610  | 98,858,784  | 2 | 1 | 3 | 0 |
| Case 95 | 7 | 98,861,915  | 99,460,458  | 1 | 1 | 2 | 0 |
| Case 95 | 7 | 99,461,160  | 99,774,740  | 2 | 1 | 3 | 0 |
| Case 95 | 7 | 99,774,815  | 101,864,836 | 1 | 1 | 2 | 0 |
| Case 95 | 7 | 101,865,210 | 102,113,373 | 2 | 1 | 3 | 0 |
| Case 95 | 7 | 102,113,841 | 104,626,690 | 1 | 1 | 2 | 0 |
| Case 95 | 7 | 104,632,980 | 104,752,385 | 1 | 0 | 1 | 0 |
| Case 95 | 7 | 104,752,423 | 107,211,657 | 1 | 1 | 2 | 0 |
| Case 95 | 7 | 107,211,703 | 107,472,138 | 2 | 1 | 3 | 0 |
| Case 95 | 7 | 107,472,872 | 135,925,039 | 1 | 1 | 2 | 0 |
| Case 95 | 7 | 135,938,900 | 136,319,271 | 2 | 1 | 3 | 0 |
| Case 95 | 7 | 136,326,080 | 149,512,674 | 1 | 1 | 2 | 0 |
| Case 95 | 7 | 149,512,800 | 149,519,760 | 1 | 0 | 1 | 0 |
| Case 95 | 7 | 149,519,770 | 155,546,241 | 1 | 1 | 2 | 0 |
| Case 95 | 7 | 155,555,930 | 155,901,297 | 2 | 1 | 3 | 0 |
| Case 95 | 7 | 155,914,367 | 159,119,486 | 1 | 1 | 2 | 0 |
| Case 95 | 8 | 164,984     | 7,007,415   | 2 | 0 | 2 | 1 |
| Case 95 | 8 | 7,308,659   | 7,379,037   | 0 | 0 | 0 | 0 |
| Case 95 | 8 | 7,718,170   | 8,222,480   | 2 | 0 | 2 | 1 |
| Case 95 | 8 | 8,230,361   | 8,378,992   | 4 | 0 | 4 | 1 |
| Case 95 | 8 | 8,380,016   | 15,395,144  | 2 | 0 | 2 | 1 |
| Case 95 | 8 | 15,400,574  | 15,410,250  | 0 | 0 | 0 | 0 |
| Case 95 | 8 | 15,419,777  | 18,856,363  | 2 | 0 | 2 | 1 |
| Case 95 | 8 | 18,857,090  | 19,207,820  | 3 | 0 | 3 | 1 |
| Case 95 | 8 | 19,211,220  | 22,713,012  | 2 | 0 | 2 | 1 |
| Case 95 | 8 | 22,718,237  | 23,340,546  | 3 | 0 | 3 | 1 |
| Case 95 | 8 | 23,344,403  | 23,553,455  | 2 | 0 | 2 | 1 |
| Case 95 | 8 | 23,554,565  | 24,090,176  | 3 | 0 | 3 | 1 |
| Case 95 | 8 | 24,094,711  | 24,811,204  | 2 | 0 | 2 | 1 |
| Case 95 | 8 | 24,811,765  | 25,172,706  | 3 | 0 | 3 | 1 |
| Case 95 | 8 | 25,172,949  | 29,246,441  | 2 | 0 | 2 | 1 |
| Case 95 | 8 | 29,247,126  | 29,760,101  | 3 | 0 | 3 | 1 |
| Case 95 | 8 | 29,778,575  | 43,791,691  | 2 | 0 | 2 | 1 |
| Case 95 | 8 | 46,886,735  | 47,572,540  | 2 | 0 | 2 | 1 |
| Case 95 | 8 | 47,610,370  | 50,070,098  | 2 | 1 | 3 | 0 |
| Case 95 | 8 | 50,072,010  | 52,623,166  | 2 | 0 | 2 | 1 |
| Case 95 | 8 | 52,624,400  | 53,114,569  | 2 | 1 | 3 | 0 |
| Case 95 | 8 | 53,115,983  | 55,049,131  | 2 | 0 | 2 | 1 |
| Case 95 | 8 | 55,049,188  | 62,450,266  | 2 | 1 | 3 | 0 |
| Case 95 | 8 | 62,458,019  | 62,465,795  | 2 | 2 | 4 | 0 |

|         |   |             |             |   |   |   |   |
|---------|---|-------------|-------------|---|---|---|---|
| Case 95 | 8 | 62,465,814  | 62,873,803  | 4 | 1 | 5 | 0 |
| Case 95 | 8 | 62,881,744  | 62,881,744  | 2 | 2 | 4 | 0 |
| Case 95 | 8 | 62,885,312  | 67,488,288  | 2 | 1 | 3 | 0 |
| Case 95 | 8 | 67,488,388  | 67,697,245  | 1 | 1 | 2 | 0 |
| Case 95 | 8 | 67,699,805  | 78,070,394  | 2 | 1 | 3 | 0 |
| Case 95 | 8 | 78,093,837  | 79,906,572  | 1 | 1 | 2 | 0 |
| Case 95 | 8 | 79,916,893  | 82,123,005  | 2 | 1 | 3 | 0 |
| Case 95 | 8 | 82,149,338  | 82,363,342  | 3 | 1 | 4 | 0 |
| Case 95 | 8 | 82,370,252  | 96,090,259  | 2 | 1 | 3 | 0 |
| Case 95 | 8 | 96,099,666  | 96,858,955  | 2 | 2 | 4 | 0 |
| Case 95 | 8 | 96,859,623  | 101,284,322 | 2 | 1 | 3 | 0 |
| Case 95 | 8 | 101,285,717 | 101,813,156 | 3 | 1 | 4 | 0 |
| Case 95 | 8 | 101,816,789 | 120,034,105 | 2 | 1 | 3 | 0 |
| Case 95 | 8 | 120,039,462 | 120,271,776 | 3 | 1 | 4 | 0 |
| Case 95 | 8 | 120,275,270 | 128,258,492 | 2 | 1 | 3 | 0 |
| Case 95 | 8 | 128,261,927 | 128,355,019 | 2 | 2 | 4 | 0 |
| Case 95 | 8 | 128,355,618 | 128,844,721 | 3 | 1 | 4 | 0 |
| Case 95 | 8 | 128,853,816 | 128,889,371 | 2 | 1 | 3 | 0 |
| Case 95 | 8 | 128,890,261 | 131,769,694 | 2 | 2 | 4 | 0 |
| Case 95 | 8 | 131,771,222 | 131,994,393 | 2 | 1 | 3 | 0 |
| Case 95 | 8 | 131,997,225 | 133,880,375 | 2 | 2 | 4 | 0 |
| Case 95 | 8 | 133,881,244 | 134,134,673 | 2 | 1 | 3 | 0 |
| Case 95 | 8 | 134,138,581 | 134,519,265 | 2 | 2 | 4 | 0 |
| Case 95 | 8 | 134,519,479 | 134,681,123 | 2 | 1 | 3 | 0 |
| Case 95 | 8 | 134,684,826 | 136,666,924 | 2 | 2 | 4 | 0 |
| Case 95 | 8 | 136,667,194 | 136,855,729 | 2 | 1 | 3 | 0 |
| Case 95 | 8 | 136,868,367 | 138,816,115 | 2 | 2 | 4 | 0 |
| Case 95 | 8 | 138,820,097 | 140,016,398 | 2 | 1 | 3 | 0 |
| Case 95 | 8 | 140,018,998 | 141,149,918 | 2 | 2 | 4 | 0 |
| Case 95 | 8 | 141,150,169 | 141,358,681 | 2 | 1 | 3 | 0 |
| Case 95 | 8 | 141,360,167 | 142,109,356 | 2 | 2 | 4 | 0 |
| Case 95 | 8 | 142,122,693 | 142,451,314 | 2 | 1 | 3 | 0 |
| Case 95 | 8 | 142,451,350 | 144,621,058 | 2 | 2 | 4 | 0 |
| Case 95 | 8 | 144,621,084 | 145,215,919 | 2 | 1 | 3 | 0 |
| Case 95 | 8 | 145,216,008 | 145,580,028 | 2 | 2 | 4 | 0 |
| Case 95 | 8 | 145,580,530 | 145,818,782 | 2 | 1 | 3 | 0 |
| Case 95 | 8 | 145,830,957 | 146,293,414 | 2 | 2 | 4 | 0 |
| Case 95 | 9 | 46,587      | 21,974,640  | 2 | 1 | 3 | 0 |
| Case 95 | 9 | 21,974,720  | 22,481,286  | 3 | 1 | 4 | 0 |
| Case 95 | 9 | 22,487,177  | 35,404,007  | 2 | 1 | 3 | 0 |
| Case 95 | 9 | 35,404,008  | 35,546,735  | 3 | 1 | 4 | 0 |
| Case 95 | 9 | 35,547,052  | 35,964,627  | 2 | 1 | 3 | 0 |
| Case 95 | 9 | 35,966,699  | 36,100,388  | 2 | 2 | 4 | 0 |
| Case 95 | 9 | 36,100,504  | 38,771,460  | 2 | 1 | 3 | 0 |
| Case 95 | 9 | 38,771,831  | 46,944,322  | 2 | 0 | 2 | 1 |
| Case 95 | 9 | 65,629,772  | 74,733,695  | 2 | 0 | 2 | 1 |
| Case 95 | 9 | 74,733,832  | 75,012,258  | 3 | 0 | 3 | 1 |
| Case 95 | 9 | 75,021,841  | 99,521,123  | 2 | 0 | 2 | 1 |
| Case 95 | 9 | 99,521,136  | 99,522,706  | 1 | 0 | 1 | 0 |
| Case 95 | 9 | 99,525,487  | 103,955,777 | 2 | 0 | 2 | 1 |
| Case 95 | 9 | 103,960,732 | 104,210,432 | 3 | 0 | 3 | 1 |
| Case 95 | 9 | 104,211,810 | 110,113,919 | 2 | 0 | 2 | 1 |
| Case 95 | 9 | 110,114,432 | 110,732,838 | 3 | 0 | 3 | 1 |
| Case 95 | 9 | 110,734,905 | 114,707,212 | 2 | 0 | 2 | 1 |
| Case 95 | 9 | 114,711,743 | 114,888,773 | 2 | 1 | 3 | 0 |
| Case 95 | 9 | 114,902,932 | 115,013,224 | 1 | 0 | 1 | 0 |
| Case 95 | 9 | 115,015,710 | 117,852,975 | 2 | 1 | 3 | 0 |
| Case 95 | 9 | 117,853,022 | 118,029,484 | 2 | 2 | 4 | 0 |
| Case 95 | 9 | 118,029,729 | 124,536,644 | 2 | 1 | 3 | 0 |
| Case 95 | 9 | 124,543,753 | 130,702,477 | 2 | 0 | 2 | 1 |
| Case 95 | 9 | 130,702,642 | 131,351,046 | 3 | 0 | 3 | 1 |

|         |    |             |             |   |   |   |   |
|---------|----|-------------|-------------|---|---|---|---|
| Case 95 | 9  | 131,356,473 | 132,022,920 | 2 | 0 | 2 | 1 |
| Case 95 | 9  | 132,024,528 | 132,241,861 | 2 | 1 | 3 | 0 |
| Case 95 | 9  | 132,253,919 | 132,681,784 | 5 | 0 | 5 | 1 |
| Case 95 | 9  | 132,686,148 | 134,183,913 | 2 | 0 | 2 | 1 |
| Case 95 | 9  | 134,184,191 | 134,247,571 | 4 | 0 | 4 | 1 |
| Case 95 | 9  | 134,254,451 | 135,277,161 | 2 | 0 | 2 | 1 |
| Case 95 | 9  | 135,277,166 | 135,285,690 | 1 | 0 | 1 | 0 |
| Case 95 | 9  | 135,285,791 | 136,007,358 | 2 | 0 | 2 | 1 |
| Case 95 | 9  | 136,007,988 | 136,179,704 | 4 | 0 | 4 | 1 |
| Case 95 | 9  | 136,184,526 | 139,244,192 | 2 | 1 | 3 | 0 |
| Case 95 | 9  | 139,245,289 | 139,301,916 | 3 | 1 | 4 | 0 |
| Case 95 | 9  | 139,301,959 | 139,361,472 | 2 | 1 | 3 | 0 |
| Case 95 | 9  | 139,362,876 | 139,726,282 | 2 | 2 | 4 | 0 |
| Case 95 | 9  | 139,728,202 | 141,066,491 | 3 | 1 | 4 | 0 |
| Case 95 | 10 | 98,087      | 3,176,363   | 1 | 0 | 1 | 0 |
| Case 95 | 10 | 3,176,389   | 3,323,773   | 2 | 0 | 2 | 1 |
| Case 95 | 10 | 3,327,813   | 3,857,816   | 1 | 0 | 1 | 0 |
| Case 95 | 10 | 3,858,778   | 3,962,232   | 2 | 0 | 2 | 1 |
| Case 95 | 10 | 3,969,047   | 5,375,877   | 1 | 0 | 1 | 0 |
| Case 95 | 10 | 5,379,362   | 5,469,386   | 2 | 0 | 2 | 1 |
| Case 95 | 10 | 5,471,143   | 5,629,111   | 1 | 0 | 1 | 0 |
| Case 95 | 10 | 5,631,737   | 5,682,694   | 2 | 0 | 2 | 1 |
| Case 95 | 10 | 5,683,731   | 5,777,432   | 1 | 0 | 1 | 0 |
| Case 95 | 10 | 5,781,628   | 5,804,531   | 2 | 0 | 2 | 1 |
| Case 95 | 10 | 5,805,844   | 11,022,446  | 1 | 0 | 1 | 0 |
| Case 95 | 10 | 11,024,559  | 11,388,353  | 2 | 0 | 2 | 1 |
| Case 95 | 10 | 11,388,843  | 12,752,638  | 1 | 0 | 1 | 0 |
| Case 95 | 10 | 12,754,862  | 12,827,660  | 2 | 0 | 2 | 1 |
| Case 95 | 10 | 12,827,690  | 13,681,108  | 1 | 0 | 1 | 0 |
| Case 95 | 10 | 13,683,905  | 13,820,420  | 2 | 0 | 2 | 1 |
| Case 95 | 10 | 13,821,953  | 24,817,027  | 1 | 0 | 1 | 0 |
| Case 95 | 10 | 24,818,152  | 24,908,998  | 2 | 0 | 2 | 1 |
| Case 95 | 10 | 24,909,804  | 29,780,160  | 1 | 0 | 1 | 0 |
| Case 95 | 10 | 29,780,468  | 29,841,556  | 2 | 0 | 2 | 1 |
| Case 95 | 10 | 29,842,681  | 30,315,403  | 1 | 0 | 1 | 0 |
| Case 95 | 10 | 30,315,632  | 30,359,559  | 2 | 0 | 2 | 1 |
| Case 95 | 10 | 30,366,521  | 33,748,685  | 1 | 0 | 1 | 0 |
| Case 95 | 10 | 33,758,430  | 34,399,685  | 3 | 1 | 4 | 0 |
| Case 95 | 10 | 34,401,632  | 34,401,632  | 2 | 0 | 2 | 1 |
| Case 95 | 10 | 34,408,636  | 34,525,999  | 5 | 1 | 6 | 0 |
| Case 95 | 10 | 34,527,387  | 35,341,301  | 4 | 1 | 5 | 0 |
| Case 95 | 10 | 35,344,969  | 35,344,969  | 2 | 0 | 2 | 1 |
| Case 95 | 10 | 35,359,475  | 36,414,157  | 4 | 0 | 4 | 1 |
| Case 95 | 10 | 36,420,471  | 36,669,344  | 3 | 0 | 3 | 1 |
| Case 95 | 10 | 36,686,162  | 36,687,210  | 2 | 1 | 3 | 0 |
| Case 95 | 10 | 36,688,414  | 36,863,519  | 2 | 2 | 4 | 0 |
| Case 95 | 10 | 36,877,054  | 37,213,409  | 2 | 1 | 3 | 0 |
| Case 95 | 10 | 37,214,419  | 37,706,195  | 1 | 0 | 1 | 0 |
| Case 95 | 10 | 37,712,642  | 37,946,651  | 2 | 1 | 3 | 0 |
| Case 95 | 10 | 37,958,940  | 38,314,056  | 3 | 1 | 4 | 0 |
| Case 95 | 10 | 38,339,321  | 38,549,612  | 1 | 0 | 1 | 0 |
| Case 95 | 10 | 38,569,998  | 39,097,912  | 2 | 0 | 2 | 1 |
| Case 95 | 10 | 42,436,301  | 61,612,159  | 2 | 0 | 2 | 1 |
| Case 95 | 10 | 61,614,418  | 61,630,250  | 0 | 0 | 0 | 0 |
| Case 95 | 10 | 61,631,994  | 71,560,999  | 2 | 0 | 2 | 1 |
| Case 95 | 10 | 71,562,415  | 71,862,654  | 3 | 0 | 3 | 1 |
| Case 95 | 10 | 71,866,161  | 75,520,120  | 2 | 0 | 2 | 1 |
| Case 95 | 10 | 75,520,488  | 75,849,841  | 3 | 0 | 3 | 1 |
| Case 95 | 10 | 75,849,898  | 80,302,281  | 2 | 0 | 2 | 1 |
| Case 95 | 10 | 80,306,807  | 80,640,638  | 3 | 0 | 3 | 1 |
| Case 95 | 10 | 80,641,807  | 95,109,621  | 2 | 0 | 2 | 1 |

|         |    |             |             |   |   |   |   |
|---------|----|-------------|-------------|---|---|---|---|
| Case 95 | 10 | 95,109,633  | 95,538,467  | 3 | 0 | 3 | 1 |
| Case 95 | 10 | 95,541,735  | 104,125,334 | 2 | 0 | 2 | 1 |
| Case 95 | 10 | 104,126,256 | 115,198,443 | 2 | 1 | 3 | 0 |
| Case 95 | 10 | 115,205,714 | 115,587,010 | 3 | 1 | 4 | 0 |
| Case 95 | 10 | 115,589,161 | 126,962,284 | 2 | 1 | 3 | 0 |
| Case 95 | 10 | 126,963,368 | 127,168,157 | 3 | 1 | 4 | 0 |
| Case 95 | 10 | 127,170,574 | 135,477,883 | 2 | 1 | 3 | 0 |
| Case 95 | 11 | 193,146     | 1,018,711   | 2 | 1 | 3 | 0 |
| Case 95 | 11 | 1,019,194   | 1,263,776   | 3 | 1 | 4 | 0 |
| Case 95 | 11 | 1,265,998   | 1,680,161   | 3 | 0 | 3 | 1 |
| Case 95 | 11 | 1,689,325   | 1,803,095   | 2 | 0 | 2 | 1 |
| Case 95 | 11 | 1,804,417   | 2,068,776   | 3 | 0 | 3 | 1 |
| Case 95 | 11 | 2,070,570   | 2,608,850   | 2 | 0 | 2 | 1 |
| Case 95 | 11 | 2,608,860   | 2,781,519   | 3 | 0 | 3 | 1 |
| Case 95 | 11 | 2,782,648   | 11,400,647  | 2 | 0 | 2 | 1 |
| Case 95 | 11 | 11,401,119  | 11,466,133  | 3 | 0 | 3 | 1 |
| Case 95 | 11 | 11,466,613  | 11,731,251  | 2 | 0 | 2 | 1 |
| Case 95 | 11 | 11,739,732  | 12,317,933  | 4 | 0 | 4 | 1 |
| Case 95 | 11 | 12,327,308  | 17,455,371  | 2 | 0 | 2 | 1 |
| Case 95 | 11 | 17,457,493  | 17,489,445  | 3 | 0 | 3 | 1 |
| Case 95 | 11 | 17,491,386  | 24,542,153  | 2 | 0 | 2 | 1 |
| Case 95 | 11 | 24,543,242  | 25,756,735  | 5 | 1 | 6 | 0 |
| Case 95 | 11 | 25,764,292  | 30,709,418  | 4 | 1 | 5 | 0 |
| Case 95 | 11 | 30,724,208  | 34,477,125  | 2 | 2 | 4 | 0 |
| Case 95 | 11 | 34,477,291  | 34,571,836  | 4 | 1 | 5 | 0 |
| Case 95 | 11 | 34,573,817  | 36,988,302  | 2 | 2 | 4 | 0 |
| Case 95 | 11 | 36,989,149  | 37,643,435  | 3 | 2 | 5 | 0 |
| Case 95 | 11 | 37,646,906  | 40,708,010  | 2 | 2 | 4 | 0 |
| Case 95 | 11 | 40,709,637  | 40,742,299  | 3 | 1 | 4 | 0 |
| Case 95 | 11 | 40,744,768  | 40,764,896  | 2 | 0 | 2 | 1 |
| Case 95 | 11 | 40,767,022  | 40,946,450  | 6 | 1 | 7 | 0 |
| Case 95 | 11 | 40,961,066  | 40,961,066  | 2 | 0 | 2 | 1 |
| Case 95 | 11 | 40,966,294  | 42,989,183  | 2 | 2 | 4 | 0 |
| Case 95 | 11 | 42,992,520  | 45,706,162  | 4 | 1 | 5 | 0 |
| Case 95 | 11 | 45,706,453  | 45,711,140  | 2 | 2 | 4 | 0 |
| Case 95 | 11 | 45,717,929  | 46,090,550  | 2 | 1 | 3 | 0 |
| Case 95 | 11 | 46,122,023  | 46,281,835  | 3 | 1 | 4 | 0 |
| Case 95 | 11 | 46,292,055  | 50,241,556  | 2 | 1 | 3 | 0 |
| Case 95 | 11 | 50,248,332  | 51,591,253  | 2 | 0 | 2 | 1 |
| Case 95 | 11 | 54,794,237  | 55,362,955  | 2 | 0 | 2 | 1 |
| Case 95 | 11 | 55,370,325  | 55,427,700  | 0 | 0 | 0 | 0 |
| Case 95 | 11 | 55,431,897  | 55,541,602  | 2 | 1 | 3 | 0 |
| Case 95 | 11 | 55,541,620  | 56,107,439  | 2 | 0 | 2 | 1 |
| Case 95 | 11 | 56,113,516  | 57,420,885  | 2 | 1 | 3 | 0 |
| Case 95 | 11 | 57,424,000  | 61,157,056  | 2 | 0 | 2 | 1 |
| Case 95 | 11 | 61,161,430  | 61,809,207  | 3 | 0 | 3 | 1 |
| Case 95 | 11 | 61,809,530  | 63,127,621  | 2 | 0 | 2 | 1 |
| Case 95 | 11 | 63,136,501  | 63,377,828  | 3 | 0 | 3 | 1 |
| Case 95 | 11 | 63,381,249  | 63,885,451  | 2 | 0 | 2 | 1 |
| Case 95 | 11 | 63,885,582  | 64,088,252  | 3 | 0 | 3 | 1 |
| Case 95 | 11 | 64,088,435  | 65,886,662  | 2 | 0 | 2 | 1 |
| Case 95 | 11 | 65,910,129  | 66,313,693  | 3 | 0 | 3 | 1 |
| Case 95 | 11 | 66,314,514  | 66,571,509  | 2 | 0 | 2 | 1 |
| Case 95 | 11 | 66,579,572  | 66,889,558  | 3 | 0 | 3 | 1 |
| Case 95 | 11 | 66,898,492  | 69,265,238  | 2 | 0 | 2 | 1 |
| Case 95 | 11 | 69,266,710  | 69,403,278  | 3 | 0 | 3 | 1 |
| Case 95 | 11 | 69,406,112  | 70,253,475  | 2 | 0 | 2 | 1 |
| Case 95 | 11 | 70,257,669  | 70,346,686  | 3 | 0 | 3 | 1 |
| Case 95 | 11 | 70,348,919  | 72,946,279  | 2 | 0 | 2 | 1 |
| Case 95 | 11 | 72,946,298  | 73,171,306  | 3 | 0 | 3 | 1 |
| Case 95 | 11 | 73,179,451  | 74,065,411  | 2 | 0 | 2 | 1 |

|         |    |             |             |   |   |   |   |
|---------|----|-------------|-------------|---|---|---|---|
| Case 95 | 11 | 74,071,072  | 74,166,320  | 4 | 0 | 4 | 1 |
| Case 95 | 11 | 74,167,630  | 77,611,609  | 2 | 0 | 2 | 1 |
| Case 95 | 11 | 77,617,950  | 77,714,746  | 4 | 0 | 4 | 1 |
| Case 95 | 11 | 77,719,612  | 77,796,717  | 3 | 0 | 3 | 1 |
| Case 95 | 11 | 77,811,196  | 90,042,539  | 2 | 0 | 2 | 1 |
| Case 95 | 11 | 90,050,153  | 91,994,044  | 1 | 0 | 1 | 0 |
| Case 95 | 11 | 91,995,496  | 92,714,801  | 2 | 0 | 2 | 1 |
| Case 95 | 11 | 92,715,081  | 93,184,074  | 1 | 0 | 1 | 0 |
| Case 95 | 11 | 93,206,181  | 93,261,886  | 2 | 0 | 2 | 1 |
| Case 95 | 11 | 93,264,680  | 93,596,420  | 1 | 0 | 1 | 0 |
| Case 95 | 11 | 93,596,599  | 93,839,219  | 2 | 0 | 2 | 1 |
| Case 95 | 11 | 93,842,104  | 94,112,883  | 1 | 0 | 1 | 0 |
| Case 95 | 11 | 94,113,325  | 94,134,236  | 2 | 0 | 2 | 1 |
| Case 95 | 11 | 94,147,464  | 94,312,323  | 1 | 0 | 1 | 0 |
| Case 95 | 11 | 94,313,230  | 94,554,713  | 2 | 0 | 2 | 1 |
| Case 95 | 11 | 94,554,836  | 94,732,033  | 1 | 0 | 1 | 0 |
| Case 95 | 11 | 94,740,143  | 95,470,346  | 2 | 0 | 2 | 1 |
| Case 95 | 11 | 95,486,859  | 95,712,527  | 1 | 0 | 1 | 0 |
| Case 95 | 11 | 95,712,558  | 95,929,222  | 2 | 0 | 2 | 1 |
| Case 95 | 11 | 95,929,945  | 96,115,744  | 1 | 0 | 1 | 0 |
| Case 95 | 11 | 96,116,444  | 96,503,340  | 2 | 0 | 2 | 1 |
| Case 95 | 11 | 96,503,971  | 96,651,455  | 1 | 0 | 1 | 0 |
| Case 95 | 11 | 96,652,574  | 96,822,982  | 2 | 0 | 2 | 1 |
| Case 95 | 11 | 96,823,102  | 101,621,924 | 1 | 0 | 1 | 0 |
| Case 95 | 11 | 101,624,193 | 101,762,019 | 2 | 0 | 2 | 1 |
| Case 95 | 11 | 101,762,191 | 102,401,661 | 1 | 0 | 1 | 0 |
| Case 95 | 11 | 102,402,858 | 102,647,396 | 2 | 0 | 2 | 1 |
| Case 95 | 11 | 102,647,536 | 103,892,231 | 1 | 0 | 1 | 0 |
| Case 95 | 11 | 103,899,109 | 103,924,576 | 2 | 0 | 2 | 1 |
| Case 95 | 11 | 103,936,469 | 104,821,746 | 1 | 0 | 1 | 0 |
| Case 95 | 11 | 104,825,482 | 105,010,448 | 2 | 0 | 2 | 1 |
| Case 95 | 11 | 105,016,907 | 105,475,600 | 1 | 0 | 1 | 0 |
| Case 95 | 11 | 105,482,024 | 106,182,251 | 2 | 0 | 2 | 1 |
| Case 95 | 11 | 106,204,781 | 108,380,670 | 1 | 0 | 1 | 0 |
| Case 95 | 11 | 108,380,740 | 108,381,468 | 2 | 0 | 2 | 1 |
| Case 95 | 11 | 108,381,516 | 108,429,200 | 1 | 0 | 1 | 0 |
| Case 95 | 11 | 108,429,776 | 109,071,810 | 2 | 0 | 2 | 1 |
| Case 95 | 11 | 109,073,592 | 109,241,241 | 1 | 0 | 1 | 0 |
| Case 95 | 11 | 109,248,030 | 111,290,086 | 2 | 0 | 2 | 1 |
| Case 95 | 11 | 111,298,298 | 112,043,614 | 1 | 0 | 1 | 0 |
| Case 95 | 11 | 112,044,900 | 113,269,792 | 2 | 0 | 2 | 1 |
| Case 95 | 11 | 113,269,852 | 113,278,447 | 1 | 0 | 1 | 0 |
| Case 95 | 11 | 113,278,764 | 113,631,637 | 2 | 0 | 2 | 1 |
| Case 95 | 11 | 113,638,177 | 113,683,078 | 1 | 0 | 1 | 0 |
| Case 95 | 11 | 113,684,612 | 113,823,865 | 2 | 0 | 2 | 1 |
| Case 95 | 11 | 113,833,152 | 113,904,382 | 1 | 0 | 1 | 0 |
| Case 95 | 11 | 113,910,276 | 114,125,324 | 2 | 0 | 2 | 1 |
| Case 95 | 11 | 114,128,967 | 114,270,802 | 1 | 0 | 1 | 0 |
| Case 95 | 11 | 114,270,997 | 117,105,034 | 2 | 0 | 2 | 1 |
| Case 95 | 11 | 117,107,775 | 117,279,712 | 1 | 0 | 1 | 0 |
| Case 95 | 11 | 117,280,349 | 118,435,756 | 2 | 0 | 2 | 1 |
| Case 95 | 11 | 118,441,079 | 118,793,918 | 1 | 0 | 1 | 0 |
| Case 95 | 11 | 118,801,235 | 119,045,378 | 2 | 0 | 2 | 1 |
| Case 95 | 11 | 119,045,408 | 119,059,463 | 1 | 0 | 1 | 0 |
| Case 95 | 11 | 119,059,532 | 119,956,631 | 2 | 0 | 2 | 1 |
| Case 95 | 11 | 119,957,516 | 119,998,234 | 3 | 0 | 3 | 1 |
| Case 95 | 11 | 119,998,271 | 120,825,575 | 2 | 0 | 2 | 1 |
| Case 95 | 11 | 120,826,131 | 121,299,288 | 3 | 0 | 3 | 1 |
| Case 95 | 11 | 121,301,819 | 124,095,884 | 2 | 0 | 2 | 1 |
| Case 95 | 11 | 124,096,292 | 124,096,305 | 7 | 0 | 7 | 1 |
| Case 95 | 11 | 124,100,201 | 125,869,966 | 2 | 0 | 2 | 1 |

|         |    |             |             |   |   |   |   |
|---------|----|-------------|-------------|---|---|---|---|
| Case 95 | 11 | 125,871,554 | 126,060,666 | 3 | 0 | 3 | 1 |
| Case 95 | 11 | 126,060,763 | 126,466,129 | 2 | 0 | 2 | 1 |
| Case 95 | 11 | 126,467,667 | 126,864,307 | 3 | 0 | 3 | 1 |
| Case 95 | 11 | 126,864,588 | 128,807,619 | 2 | 0 | 2 | 1 |
| Case 95 | 11 | 128,808,927 | 129,280,473 | 3 | 0 | 3 | 1 |
| Case 95 | 11 | 129,285,091 | 129,291,462 | 2 | 0 | 2 | 1 |
| Case 95 | 11 | 129,299,871 | 129,507,034 | 5 | 0 | 5 | 1 |
| Case 95 | 11 | 129,523,831 | 132,042,611 | 2 | 0 | 2 | 1 |
| Case 95 | 11 | 132,043,292 | 132,151,081 | 3 | 0 | 3 | 1 |
| Case 95 | 11 | 132,152,426 | 134,934,063 | 2 | 0 | 2 | 1 |
| Case 95 | 12 | 191,619     | 786,238     | 2 | 1 | 3 | 0 |
| Case 95 | 12 | 789,152     | 1,291,195   | 1 | 1 | 2 | 0 |
| Case 95 | 12 | 1,291,271   | 2,998,892   | 2 | 1 | 3 | 0 |
| Case 95 | 12 | 3,004,526   | 3,788,091   | 2 | 0 | 2 | 1 |
| Case 95 | 12 | 3,788,145   | 4,553,383   | 3 | 0 | 3 | 1 |
| Case 95 | 12 | 4,553,391   | 13,575,143  | 2 | 0 | 2 | 1 |
| Case 95 | 12 | 13,576,211  | 13,644,646  | 3 | 0 | 3 | 1 |
| Case 95 | 12 | 13,645,345  | 34,294,699  | 2 | 0 | 2 | 1 |
| Case 95 | 12 | 34,306,859  | 34,853,011  | 1 | 0 | 1 | 0 |
| Case 95 | 12 | 37,876,400  | 38,573,362  | 1 | 0 | 1 | 0 |
| Case 95 | 12 | 38,588,392  | 52,681,841  | 2 | 0 | 2 | 1 |
| Case 95 | 12 | 52,681,908  | 53,012,085  | 3 | 0 | 3 | 1 |
| Case 95 | 12 | 53,012,128  | 53,042,792  | 2 | 1 | 3 | 0 |
| Case 95 | 12 | 53,042,808  | 53,117,023  | 3 | 1 | 4 | 0 |
| Case 95 | 12 | 53,119,891  | 54,252,030  | 2 | 1 | 3 | 0 |
| Case 95 | 12 | 54,255,207  | 54,649,941  | 3 | 1 | 4 | 0 |
| Case 95 | 12 | 54,651,471  | 55,042,807  | 2 | 1 | 3 | 0 |
| Case 95 | 12 | 55,042,958  | 55,188,872  | 3 | 1 | 4 | 0 |
| Case 95 | 12 | 55,205,760  | 57,049,193  | 2 | 1 | 3 | 0 |
| Case 95 | 12 | 57,050,174  | 76,349,064  | 1 | 1 | 2 | 0 |
| Case 95 | 12 | 76,352,699  | 76,424,644  | 2 | 1 | 3 | 0 |
| Case 95 | 12 | 76,424,753  | 95,681,492  | 1 | 1 | 2 | 0 |
| Case 95 | 12 | 95,681,539  | 95,765,917  | 2 | 1 | 3 | 0 |
| Case 95 | 12 | 95,770,832  | 109,895,168 | 1 | 1 | 2 | 0 |
| Case 95 | 12 | 109,898,523 | 110,240,859 | 2 | 1 | 3 | 0 |
| Case 95 | 12 | 110,242,933 | 133,810,935 | 1 | 1 | 2 | 0 |
| Case 95 | 13 | 19,058,717  | 27,421,621  | 1 | 1 | 2 | 0 |
| Case 95 | 13 | 27,426,553  | 27,701,862  | 2 | 1 | 3 | 0 |
| Case 95 | 13 | 27,705,697  | 57,703,846  | 1 | 1 | 2 | 0 |
| Case 95 | 13 | 57,704,823  | 57,704,823  | 1 | 0 | 1 | 0 |
| Case 95 | 13 | 57,711,953  | 57,824,156  | 0 | 0 | 0 | 0 |
| Case 95 | 13 | 57,827,157  | 57,827,157  | 2 | 1 | 3 | 0 |
| Case 95 | 13 | 57,835,021  | 73,603,693  | 1 | 1 | 2 | 0 |
| Case 95 | 13 | 73,609,881  | 74,010,099  | 3 | 1 | 4 | 0 |
| Case 95 | 13 | 74,019,374  | 113,139,568 | 1 | 1 | 2 | 0 |
| Case 95 | 13 | 113,143,942 | 113,465,320 | 2 | 1 | 3 | 0 |
| Case 95 | 13 | 113,467,616 | 115,086,044 | 1 | 1 | 2 | 0 |
| Case 95 | 13 | 115,087,913 | 115,103,529 | 2 | 1 | 3 | 0 |
| Case 95 | 14 | 19,280,733  | 20,444,236  | 2 | 1 | 3 | 0 |
| Case 95 | 14 | 20,445,370  | 22,488,581  | 2 | 0 | 2 | 1 |
| Case 95 | 14 | 22,491,072  | 23,009,999  | 3 | 0 | 3 | 1 |
| Case 95 | 14 | 23,011,465  | 32,589,339  | 2 | 0 | 2 | 1 |
| Case 95 | 14 | 32,592,200  | 32,775,473  | 1 | 0 | 1 | 0 |
| Case 95 | 14 | 32,775,851  | 34,083,650  | 2 | 0 | 2 | 1 |
| Case 95 | 14 | 34,084,149  | 34,181,880  | 3 | 0 | 3 | 1 |
| Case 95 | 14 | 34,182,289  | 35,790,399  | 2 | 0 | 2 | 1 |
| Case 95 | 14 | 35,793,657  | 35,900,723  | 3 | 0 | 3 | 1 |
| Case 95 | 14 | 35,901,490  | 53,023,847  | 2 | 0 | 2 | 1 |
| Case 95 | 14 | 53,027,908  | 53,119,875  | 1 | 0 | 1 | 0 |
| Case 95 | 14 | 53,124,867  | 56,370,925  | 2 | 0 | 2 | 1 |
| Case 95 | 14 | 56,371,174  | 56,521,706  | 3 | 0 | 3 | 1 |

|         |    |             |             |   |   |   |   |
|---------|----|-------------|-------------|---|---|---|---|
| Case 95 | 14 | 56,522,061  | 68,907,936  | 2 | 0 | 2 | 1 |
| Case 95 | 14 | 68,911,269  | 69,038,981  | 3 | 0 | 3 | 1 |
| Case 95 | 14 | 69,039,588  | 69,117,512  | 4 | 0 | 4 | 1 |
| Case 95 | 14 | 69,118,241  | 69,526,307  | 3 | 0 | 3 | 1 |
| Case 95 | 14 | 69,533,837  | 75,283,907  | 2 | 0 | 2 | 1 |
| Case 95 | 14 | 75,288,518  | 75,591,071  | 3 | 0 | 3 | 1 |
| Case 95 | 14 | 75,593,566  | 100,581,068 | 2 | 0 | 2 | 1 |
| Case 95 | 14 | 100,587,813 | 101,071,722 | 4 | 0 | 4 | 1 |
| Case 95 | 14 | 101,094,177 | 102,827,643 | 2 | 0 | 2 | 1 |
| Case 95 | 14 | 102,828,506 | 103,493,868 | 3 | 0 | 3 | 1 |
| Case 95 | 14 | 103,520,762 | 103,934,484 | 4 | 0 | 4 | 1 |
| Case 95 | 14 | 103,934,488 | 107,287,663 | 2 | 0 | 2 | 1 |
| Case 95 | 15 | 20,034,919  | 43,489,532  | 1 | 1 | 2 | 0 |
| Case 95 | 15 | 43,489,544  | 44,102,010  | 2 | 1 | 3 | 0 |
| Case 95 | 15 | 44,102,033  | 57,459,278  | 1 | 1 | 2 | 0 |
| Case 95 | 15 | 57,484,419  | 57,823,404  | 2 | 1 | 3 | 0 |
| Case 95 | 15 | 57,824,330  | 70,384,464  | 1 | 1 | 2 | 0 |
| Case 95 | 15 | 70,402,309  | 70,667,702  | 2 | 1 | 3 | 0 |
| Case 95 | 15 | 70,670,688  | 74,080,674  | 1 | 1 | 2 | 0 |
| Case 95 | 15 | 74,081,521  | 74,338,939  | 2 | 1 | 3 | 0 |
| Case 95 | 15 | 74,343,330  | 85,382,193  | 1 | 1 | 2 | 0 |
| Case 95 | 15 | 85,382,307  | 85,568,434  | 2 | 1 | 3 | 0 |
| Case 95 | 15 | 85,568,535  | 90,328,704  | 1 | 1 | 2 | 0 |
| Case 95 | 15 | 90,331,614  | 90,581,016  | 2 | 1 | 3 | 0 |
| Case 95 | 15 | 90,585,859  | 91,416,605  | 3 | 1 | 4 | 0 |
| Case 95 | 15 | 91,419,098  | 91,543,761  | 2 | 1 | 3 | 0 |
| Case 95 | 15 | 91,543,800  | 92,546,226  | 3 | 1 | 4 | 0 |
| Case 95 | 15 | 92,546,412  | 92,716,399  | 2 | 1 | 3 | 0 |
| Case 95 | 15 | 92,717,179  | 93,454,382  | 3 | 1 | 4 | 0 |
| Case 95 | 15 | 93,457,650  | 97,392,522  | 2 | 1 | 3 | 0 |
| Case 95 | 15 | 97,394,744  | 97,394,971  | 0 | 0 | 0 | 0 |
| Case 95 | 15 | 97,401,222  | 101,866,596 | 2 | 1 | 3 | 0 |
| Case 95 | 15 | 101,869,255 | 102,165,803 | 3 | 1 | 4 | 0 |
| Case 95 | 15 | 102,182,183 | 102,461,162 | 2 | 1 | 3 | 0 |
| Case 95 | 16 | 88,165      | 212,649     | 2 | 0 | 2 | 1 |
| Case 95 | 16 | 215,379     | 333,339     | 0 | 0 | 0 | 0 |
| Case 95 | 16 | 334,503     | 336,730     | 1 | 0 | 1 | 0 |
| Case 95 | 16 | 336,854     | 348,687     | 0 | 0 | 0 | 0 |
| Case 95 | 16 | 349,293     | 847,871     | 1 | 0 | 1 | 0 |
| Case 95 | 16 | 847,877     | 920,777     | 2 | 0 | 2 | 1 |
| Case 95 | 16 | 920,823     | 1,081,348   | 1 | 0 | 1 | 0 |
| Case 95 | 16 | 1,085,393   | 1,308,212   | 2 | 0 | 2 | 1 |
| Case 95 | 16 | 1,308,333   | 1,555,601   | 1 | 0 | 1 | 0 |
| Case 95 | 16 | 1,557,357   | 1,873,087   | 2 | 0 | 2 | 1 |
| Case 95 | 16 | 1,877,272   | 2,018,912   | 3 | 0 | 3 | 1 |
| Case 95 | 16 | 2,021,105   | 2,376,272   | 2 | 0 | 2 | 1 |
| Case 95 | 16 | 2,376,463   | 2,440,033   | 1 | 0 | 1 | 0 |
| Case 95 | 16 | 2,454,510   | 11,859,454  | 2 | 0 | 2 | 1 |
| Case 95 | 16 | 11,861,367  | 12,172,991  | 3 | 0 | 3 | 1 |
| Case 95 | 16 | 12,176,120  | 21,098,318  | 2 | 0 | 2 | 1 |
| Case 95 | 16 | 21,098,323  | 21,261,924  | 3 | 0 | 3 | 1 |
| Case 95 | 16 | 21,264,441  | 29,904,330  | 2 | 0 | 2 | 1 |
| Case 95 | 16 | 29,906,645  | 30,000,330  | 3 | 0 | 3 | 1 |
| Case 95 | 16 | 30,001,023  | 35,285,582  | 2 | 0 | 2 | 1 |
| Case 95 | 16 | 46,450,037  | 46,708,241  | 2 | 0 | 2 | 1 |
| Case 95 | 16 | 46,714,529  | 46,962,905  | 4 | 0 | 4 | 1 |
| Case 95 | 16 | 46,984,457  | 51,969,082  | 2 | 0 | 2 | 1 |
| Case 95 | 16 | 51,970,385  | 52,320,342  | 3 | 0 | 3 | 1 |
| Case 95 | 16 | 52,325,676  | 68,963,749  | 2 | 0 | 2 | 1 |
| Case 95 | 16 | 69,000,588  | 69,238,164  | 4 | 0 | 4 | 1 |
| Case 95 | 16 | 69,267,209  | 70,841,824  | 2 | 0 | 2 | 1 |

|         |    |            |            |   |   |   |   |
|---------|----|------------|------------|---|---|---|---|
| Case 95 | 16 | 70,843,711 | 71,218,789 | 3 | 0 | 3 | 1 |
| Case 95 | 16 | 71,220,668 | 71,902,142 | 2 | 0 | 2 | 1 |
| Case 95 | 16 | 71,917,058 | 72,249,130 | 3 | 0 | 3 | 1 |
| Case 95 | 16 | 72,250,217 | 75,306,402 | 2 | 0 | 2 | 1 |
| Case 95 | 16 | 75,308,899 | 75,655,049 | 3 | 0 | 3 | 1 |
| Case 95 | 16 | 75,657,221 | 78,264,680 | 2 | 0 | 2 | 1 |
| Case 95 | 16 | 78,265,836 | 78,332,721 | 0 | 0 | 0 | 0 |
| Case 95 | 16 | 78,338,118 | 79,147,467 | 2 | 0 | 2 | 1 |
| Case 95 | 16 | 79,149,642 | 79,427,879 | 4 | 0 | 4 | 1 |
| Case 95 | 16 | 79,434,027 | 84,575,823 | 2 | 0 | 2 | 1 |
| Case 95 | 16 | 84,576,883 | 84,623,076 | 3 | 0 | 3 | 1 |
| Case 95 | 16 | 84,623,402 | 84,786,347 | 4 | 0 | 4 | 1 |
| Case 95 | 16 | 84,793,348 | 85,696,618 | 2 | 0 | 2 | 1 |
| Case 95 | 16 | 85,696,635 | 85,736,429 | 3 | 0 | 3 | 1 |
| Case 95 | 16 | 85,736,871 | 87,493,737 | 2 | 0 | 2 | 1 |
| Case 95 | 16 | 87,504,998 | 87,585,814 | 4 | 0 | 4 | 1 |
| Case 95 | 16 | 87,586,557 | 90,274,695 | 2 | 0 | 2 | 1 |
| Case 95 | 17 | 11,885     | 1,538,110  | 2 | 0 | 2 | 1 |
| Case 95 | 17 | 1,538,172  | 1,538,851  | 1 | 0 | 1 | 0 |
| Case 95 | 17 | 1,539,540  | 4,391,201  | 2 | 0 | 2 | 1 |
| Case 95 | 17 | 4,393,498  | 4,752,260  | 3 | 0 | 3 | 1 |
| Case 95 | 17 | 4,755,424  | 22,242,355 | 2 | 0 | 2 | 1 |
| Case 95 | 17 | 25,268,142 | 25,268,142 | 2 | 0 | 2 | 1 |
| Case 95 | 17 | 25,295,032 | 26,692,205 | 2 | 1 | 3 | 0 |
| Case 95 | 17 | 26,692,248 | 27,010,340 | 3 | 0 | 3 | 1 |
| Case 95 | 17 | 27,010,367 | 27,233,280 | 2 | 0 | 2 | 1 |
| Case 95 | 17 | 27,237,307 | 27,401,852 | 3 | 0 | 3 | 1 |
| Case 95 | 17 | 27,402,827 | 27,620,815 | 2 | 1 | 3 | 0 |
| Case 95 | 17 | 27,621,034 | 29,421,200 | 2 | 0 | 2 | 1 |
| Case 95 | 17 | 29,421,869 | 29,720,140 | 2 | 1 | 3 | 0 |
| Case 95 | 17 | 29,731,964 | 37,711,565 | 2 | 0 | 2 | 1 |
| Case 95 | 17 | 37,745,979 | 37,961,820 | 5 | 0 | 5 | 1 |
| Case 95 | 17 | 37,976,469 | 38,122,686 | 7 | 0 | 7 | 1 |
| Case 95 | 17 | 38,126,757 | 38,223,403 | 4 | 0 | 4 | 1 |
| Case 95 | 17 | 38,231,376 | 38,340,876 | 2 | 1 | 3 | 0 |
| Case 95 | 17 | 38,340,897 | 38,522,806 | 1 | 1 | 2 | 0 |
| Case 95 | 17 | 38,526,973 | 38,526,973 | 2 | 1 | 3 | 0 |
| Case 95 | 17 | 38,536,983 | 38,785,718 | 3 | 1 | 4 | 0 |
| Case 95 | 17 | 38,788,153 | 39,919,408 | 2 | 1 | 3 | 0 |
| Case 95 | 17 | 39,919,560 | 40,022,809 | 2 | 0 | 2 | 1 |
| Case 95 | 17 | 40,023,467 | 40,494,902 | 3 | 0 | 3 | 1 |
| Case 95 | 17 | 40,498,273 | 41,201,364 | 2 | 0 | 2 | 1 |
| Case 95 | 17 | 41,215,385 | 41,610,270 | 3 | 0 | 3 | 1 |
| Case 95 | 17 | 41,610,296 | 42,231,961 | 2 | 1 | 3 | 0 |
| Case 95 | 17 | 42,232,442 | 42,266,899 | 1 | 1 | 2 | 0 |
| Case 95 | 17 | 42,267,949 | 43,014,884 | 2 | 1 | 3 | 0 |
| Case 95 | 17 | 43,030,679 | 43,195,699 | 2 | 2 | 4 | 0 |
| Case 95 | 17 | 43,195,786 | 46,743,914 | 2 | 1 | 3 | 0 |
| Case 95 | 17 | 46,747,019 | 47,402,716 | 2 | 0 | 2 | 1 |
| Case 95 | 17 | 47,406,913 | 47,598,296 | 3 | 0 | 3 | 1 |
| Case 95 | 17 | 47,603,516 | 48,380,383 | 2 | 0 | 2 | 1 |
| Case 95 | 17 | 48,384,501 | 48,469,775 | 3 | 0 | 3 | 1 |
| Case 95 | 17 | 48,469,863 | 48,868,181 | 4 | 0 | 4 | 1 |
| Case 95 | 17 | 48,869,758 | 49,038,352 | 3 | 0 | 3 | 1 |
| Case 95 | 17 | 49,043,640 | 58,432,486 | 2 | 0 | 2 | 1 |
| Case 95 | 17 | 58,439,018 | 59,224,241 | 2 | 1 | 3 | 0 |
| Case 95 | 17 | 59,226,618 | 59,395,595 | 2 | 2 | 4 | 0 |
| Case 95 | 17 | 59,408,449 | 59,611,085 | 2 | 1 | 3 | 0 |
| Case 95 | 17 | 59,612,041 | 59,876,546 | 2 | 2 | 4 | 0 |
| Case 95 | 17 | 59,885,856 | 61,781,407 | 2 | 1 | 3 | 0 |
| Case 95 | 17 | 61,782,325 | 61,901,532 | 2 | 2 | 4 | 0 |



|         |    |            |            |   |   |   |   |
|---------|----|------------|------------|---|---|---|---|
| Case 95 | 17 | 61,901,555 | 63,249,599 | 2 | 1 | 3 | 0 |
| Case 95 | 17 | 63,250,334 | 63,429,977 | 2 | 2 | 4 | 0 |
| Case 95 | 17 | 63,440,108 | 63,663,994 | 2 | 1 | 3 | 0 |
| Case 95 | 17 | 63,666,233 | 64,534,818 | 2 | 2 | 4 | 0 |
| Case 95 | 17 | 64,534,900 | 68,337,964 | 2 | 1 | 3 | 0 |
| Case 95 | 17 | 68,339,334 | 69,467,252 | 2 | 2 | 4 | 0 |
| Case 95 | 17 | 69,468,891 | 69,626,669 | 2 | 1 | 3 | 0 |
| Case 95 | 17 | 69,627,509 | 73,937,665 | 2 | 0 | 2 | 1 |
| Case 95 | 17 | 73,941,955 | 74,195,151 | 3 | 0 | 3 | 1 |
| Case 95 | 17 | 74,204,357 | 74,684,196 | 2 | 0 | 2 | 1 |
| Case 95 | 17 | 74,684,260 | 75,428,530 | 1 | 0 | 1 | 0 |
| Case 95 | 17 | 75,431,978 | 75,549,738 | 2 | 0 | 2 | 1 |
| Case 95 | 17 | 75,551,060 | 75,851,466 | 1 | 0 | 1 | 0 |
| Case 95 | 17 | 75,853,905 | 75,995,073 | 2 | 0 | 2 | 1 |
| Case 95 | 17 | 75,995,207 | 76,423,097 | 1 | 0 | 1 | 0 |
| Case 95 | 17 | 76,423,125 | 76,572,770 | 2 | 0 | 2 | 1 |
| Case 95 | 17 | 76,572,929 | 76,680,086 | 1 | 0 | 1 | 0 |
| Case 95 | 17 | 76,681,826 | 76,818,020 | 2 | 0 | 2 | 1 |
| Case 95 | 17 | 76,822,023 | 76,957,331 | 1 | 0 | 1 | 0 |
| Case 95 | 17 | 76,959,898 | 77,081,222 | 2 | 0 | 2 | 1 |
| Case 95 | 17 | 77,081,721 | 77,226,086 | 1 | 0 | 1 | 0 |
| Case 95 | 17 | 77,230,377 | 78,180,618 | 2 | 0 | 2 | 1 |
| Case 95 | 17 | 78,180,812 | 78,299,319 | 1 | 0 | 1 | 0 |
| Case 95 | 17 | 78,301,380 | 78,388,425 | 2 | 0 | 2 | 1 |
| Case 95 | 17 | 78,389,020 | 78,623,941 | 1 | 0 | 1 | 0 |
| Case 95 | 17 | 78,634,300 | 78,971,283 | 2 | 0 | 2 | 1 |
| Case 95 | 17 | 78,972,916 | 79,867,431 | 1 | 0 | 1 | 0 |
| Case 95 | 17 | 79,870,317 | 80,193,928 | 3 | 0 | 3 | 1 |
| Case 95 | 17 | 80,193,972 | 80,323,686 | 4 | 0 | 4 | 1 |
| Case 95 | 17 | 80,330,676 | 80,481,088 | 3 | 0 | 3 | 1 |
| Case 95 | 17 | 80,494,243 | 80,684,451 | 1 | 0 | 1 | 0 |
| Case 95 | 17 | 80,684,730 | 80,895,933 | 2 | 0 | 2 | 1 |
| Case 95 | 17 | 80,895,955 | 80,957,649 | 1 | 0 | 1 | 0 |
| Case 95 | 17 | 80,958,606 | 81,060,040 | 2 | 0 | 2 | 1 |
| Case 95 | 18 | 87,505     | 3,534,521  | 2 | 1 | 3 | 0 |
| Case 95 | 18 | 3,534,608  | 3,597,838  | 3 | 1 | 4 | 0 |
| Case 95 | 18 | 3,597,864  | 3,867,290  | 3 | 2 | 5 | 0 |
| Case 95 | 18 | 3,873,447  | 10,915,570 | 2 | 1 | 3 | 0 |
| Case 95 | 18 | 10,918,243 | 15,375,878 | 1 | 1 | 2 | 0 |
| Case 95 | 18 | 18,520,354 | 18,520,354 | 1 | 1 | 2 | 0 |
| Case 95 | 18 | 18,539,806 | 18,621,273 | 3 | 1 | 4 | 0 |
| Case 95 | 18 | 18,655,451 | 19,114,241 | 2 | 0 | 2 | 1 |
| Case 95 | 18 | 19,115,131 | 19,414,759 | 3 | 0 | 3 | 1 |
| Case 95 | 18 | 19,423,155 | 19,786,854 | 4 | 0 | 4 | 1 |
| Case 95 | 18 | 19,788,303 | 46,465,665 | 3 | 0 | 3 | 1 |
| Case 95 | 18 | 46,468,251 | 46,749,155 | 4 | 0 | 4 | 1 |
| Case 95 | 18 | 46,770,186 | 46,770,186 | 2 | 0 | 2 | 1 |
| Case 95 | 18 | 46,786,058 | 47,354,324 | 1 | 0 | 1 | 0 |
| Case 95 | 18 | 47,358,751 | 47,572,613 | 2 | 0 | 2 | 1 |
| Case 95 | 18 | 47,573,051 | 54,612,862 | 1 | 0 | 1 | 0 |
| Case 95 | 18 | 54,626,229 | 55,144,264 | 2 | 0 | 2 | 1 |
| Case 95 | 18 | 55,144,432 | 55,991,376 | 1 | 0 | 1 | 0 |
| Case 95 | 18 | 55,992,249 | 56,274,075 | 2 | 0 | 2 | 1 |
| Case 95 | 18 | 56,275,146 | 58,038,332 | 1 | 0 | 1 | 0 |
| Case 95 | 18 | 58,038,777 | 58,039,760 | 2 | 0 | 2 | 1 |
| Case 95 | 18 | 58,040,587 | 61,223,519 | 1 | 0 | 1 | 0 |
| Case 95 | 18 | 61,225,591 | 61,262,367 | 2 | 0 | 2 | 1 |
| Case 95 | 18 | 61,264,298 | 61,324,607 | 1 | 0 | 1 | 0 |
| Case 95 | 18 | 61,325,785 | 61,405,499 | 2 | 0 | 2 | 1 |
| Case 95 | 18 | 61,406,317 | 66,744,288 | 1 | 0 | 1 | 0 |
| Case 95 | 18 | 66,744,308 | 66,758,828 | 0 | 0 | 0 | 0 |

|         |    |            |            |   |   |   |   |
|---------|----|------------|------------|---|---|---|---|
| Case 95 | 18 | 66,758,997 | 67,741,207 | 1 | 0 | 1 | 0 |
| Case 95 | 18 | 67,746,299 | 67,992,817 | 2 | 0 | 2 | 1 |
| Case 95 | 18 | 67,993,104 | 68,284,128 | 3 | 0 | 3 | 1 |
| Case 95 | 18 | 68,286,760 | 68,427,051 | 2 | 0 | 2 | 1 |
| Case 95 | 18 | 68,431,692 | 71,497,993 | 1 | 0 | 1 | 0 |
| Case 95 | 18 | 71,498,095 | 71,577,366 | 2 | 0 | 2 | 1 |
| Case 95 | 18 | 71,580,190 | 71,810,010 | 1 | 0 | 1 | 0 |
| Case 95 | 18 | 71,815,122 | 71,896,469 | 2 | 0 | 2 | 1 |
| Case 95 | 18 | 71,900,332 | 72,065,966 | 1 | 0 | 1 | 0 |
| Case 95 | 18 | 72,066,424 | 72,110,674 | 2 | 0 | 2 | 1 |
| Case 95 | 18 | 72,112,616 | 72,860,180 | 1 | 0 | 1 | 0 |
| Case 95 | 18 | 72,863,702 | 73,219,777 | 2 | 0 | 2 | 1 |
| Case 95 | 18 | 73,220,635 | 73,488,376 | 1 | 0 | 1 | 0 |
| Case 95 | 18 | 73,490,428 | 73,535,558 | 2 | 0 | 2 | 1 |
| Case 95 | 18 | 73,536,711 | 75,853,450 | 1 | 0 | 1 | 0 |
| Case 95 | 18 | 75,855,094 | 75,930,831 | 2 | 0 | 2 | 1 |
| Case 95 | 18 | 75,933,383 | 77,129,563 | 1 | 0 | 1 | 0 |
| Case 95 | 18 | 77,133,899 | 77,227,918 | 2 | 0 | 2 | 1 |
| Case 95 | 18 | 77,230,409 | 77,455,227 | 1 | 0 | 1 | 0 |
| Case 95 | 18 | 77,455,308 | 77,585,701 | 2 | 0 | 2 | 1 |
| Case 95 | 18 | 77,585,900 | 77,869,022 | 1 | 0 | 1 | 0 |
| Case 95 | 18 | 77,882,827 | 78,015,180 | 2 | 0 | 2 | 1 |
| Case 95 | 19 | 260,912    | 504,796    | 2 | 0 | 2 | 1 |
| Case 95 | 19 | 504,797    | 758,474    | 3 | 0 | 3 | 1 |
| Case 95 | 19 | 758,612    | 871,044    | 4 | 0 | 4 | 1 |
| Case 95 | 19 | 871,088    | 1,047,336  | 3 | 0 | 3 | 1 |
| Case 95 | 19 | 1,047,524  | 1,056,399  | 2 | 0 | 2 | 1 |
| Case 95 | 19 | 1,056,410  | 1,192,769  | 3 | 0 | 3 | 1 |
| Case 95 | 19 | 1,199,676  | 2,094,592  | 2 | 0 | 2 | 1 |
| Case 95 | 19 | 2,097,048  | 2,500,027  | 3 | 0 | 3 | 1 |
| Case 95 | 19 | 2,500,252  | 10,544,032 | 2 | 0 | 2 | 1 |
| Case 95 | 19 | 10,546,771 | 10,738,639 | 3 | 0 | 3 | 1 |
| Case 95 | 19 | 10,738,643 | 13,017,876 | 2 | 0 | 2 | 1 |
| Case 95 | 19 | 13,019,554 | 13,218,456 | 3 | 0 | 3 | 1 |
| Case 95 | 19 | 13,220,196 | 14,043,544 | 2 | 0 | 2 | 1 |
| Case 95 | 19 | 14,043,629 | 14,044,158 | 0 | 0 | 0 | 0 |
| Case 95 | 19 | 14,044,287 | 14,199,788 | 2 | 0 | 2 | 1 |
| Case 95 | 19 | 14,199,924 | 14,475,773 | 4 | 0 | 4 | 1 |
| Case 95 | 19 | 14,490,428 | 14,655,865 | 3 | 0 | 3 | 1 |
| Case 95 | 19 | 14,656,131 | 17,361,116 | 2 | 0 | 2 | 1 |
| Case 95 | 19 | 17,361,203 | 17,370,084 | 1 | 0 | 1 | 0 |
| Case 95 | 19 | 17,370,182 | 18,726,857 | 2 | 0 | 2 | 1 |
| Case 95 | 19 | 18,727,850 | 18,994,994 | 3 | 0 | 3 | 1 |
| Case 95 | 19 | 18,998,318 | 20,890,806 | 2 | 0 | 2 | 1 |
| Case 95 | 19 | 20,892,320 | 21,157,697 | 1 | 0 | 1 | 0 |
| Case 95 | 19 | 21,158,134 | 23,387,788 | 2 | 0 | 2 | 1 |
| Case 95 | 19 | 23,388,920 | 24,629,285 | 1 | 0 | 1 | 0 |
| Case 95 | 19 | 27,732,159 | 28,243,881 | 1 | 0 | 1 | 0 |
| Case 95 | 19 | 28,246,742 | 30,276,911 | 2 | 0 | 2 | 1 |
| Case 95 | 19 | 30,286,822 | 30,478,556 | 7 | 0 | 7 | 1 |
| Case 95 | 19 | 30,496,559 | 35,199,555 | 2 | 0 | 2 | 1 |
| Case 95 | 19 | 35,219,548 | 35,449,876 | 2 | 1 | 3 | 0 |
| Case 95 | 19 | 35,450,119 | 35,647,174 | 2 | 2 | 4 | 0 |
| Case 95 | 19 | 35,648,330 | 37,005,423 | 2 | 1 | 3 | 0 |
| Case 95 | 19 | 37,005,500 | 37,038,972 | 1 | 0 | 1 | 0 |
| Case 95 | 19 | 37,039,069 | 37,367,976 | 2 | 0 | 2 | 1 |
| Case 95 | 19 | 37,368,254 | 37,368,936 | 0 | 0 | 0 | 0 |
| Case 95 | 19 | 37,374,266 | 37,854,235 | 2 | 0 | 2 | 1 |
| Case 95 | 19 | 37,854,273 | 37,905,216 | 1 | 0 | 1 | 0 |
| Case 95 | 19 | 37,907,792 | 37,909,470 | 2 | 0 | 2 | 1 |
| Case 95 | 19 | 37,917,692 | 37,997,952 | 7 | 0 | 7 | 1 |

|         |    |            |            |   |   |   |   |
|---------|----|------------|------------|---|---|---|---|
| Case 95 | 19 | 38,004,356 | 38,043,260 | 2 | 0 | 2 | 1 |
| Case 95 | 19 | 38,055,534 | 38,160,644 | 1 | 0 | 1 | 0 |
| Case 95 | 19 | 38,160,742 | 38,968,461 | 2 | 0 | 2 | 1 |
| Case 95 | 19 | 38,973,933 | 39,109,975 | 7 | 0 | 7 | 1 |
| Case 95 | 19 | 39,119,494 | 39,949,764 | 2 | 0 | 2 | 1 |
| Case 95 | 19 | 39,952,006 | 39,980,440 | 4 | 0 | 4 | 1 |
| Case 95 | 19 | 39,980,444 | 39,980,444 | 2 | 0 | 2 | 1 |
| Case 95 | 19 | 39,986,005 | 40,364,428 | 6 | 0 | 6 | 1 |
| Case 95 | 19 | 40,392,569 | 40,594,660 | 2 | 1 | 3 | 0 |
| Case 95 | 19 | 40,600,681 | 41,356,054 | 2 | 0 | 2 | 1 |
| Case 95 | 19 | 41,356,751 | 41,379,148 | 0 | 0 | 0 | 0 |
| Case 95 | 19 | 41,382,476 | 41,950,297 | 2 | 0 | 2 | 1 |
| Case 95 | 19 | 41,953,430 | 42,583,191 | 3 | 0 | 3 | 1 |
| Case 95 | 19 | 42,583,294 | 43,702,341 | 2 | 0 | 2 | 1 |
| Case 95 | 19 | 43,702,355 | 43,969,653 | 3 | 0 | 3 | 1 |
| Case 95 | 19 | 43,975,513 | 47,768,204 | 2 | 0 | 2 | 1 |
| Case 95 | 19 | 47,773,930 | 48,259,063 | 2 | 1 | 3 | 0 |
| Case 95 | 19 | 48,259,797 | 48,789,501 | 2 | 2 | 4 | 0 |
| Case 95 | 19 | 48,789,533 | 48,836,236 | 2 | 1 | 3 | 0 |
| Case 95 | 19 | 48,836,673 | 49,116,134 | 2 | 0 | 2 | 1 |
| Case 95 | 19 | 49,116,200 | 49,117,104 | 0 | 0 | 0 | 0 |
| Case 95 | 19 | 49,118,371 | 49,189,026 | 2 | 0 | 2 | 1 |
| Case 95 | 19 | 49,196,722 | 49,348,831 | 3 | 0 | 3 | 1 |
| Case 95 | 19 | 49,351,155 | 49,967,981 | 2 | 0 | 2 | 1 |
| Case 95 | 19 | 49,969,006 | 50,141,958 | 3 | 0 | 3 | 1 |
| Case 95 | 19 | 50,143,008 | 50,313,622 | 2 | 0 | 2 | 1 |
| Case 95 | 19 | 50,315,698 | 50,339,201 | 3 | 0 | 3 | 1 |
| Case 95 | 19 | 50,342,468 | 50,563,899 | 2 | 0 | 2 | 1 |
| Case 95 | 19 | 50,591,699 | 50,967,760 | 7 | 0 | 7 | 1 |
| Case 95 | 19 | 50,969,325 | 51,164,044 | 2 | 0 | 2 | 1 |
| Case 95 | 19 | 51,164,102 | 51,186,081 | 7 | 0 | 7 | 1 |
| Case 95 | 19 | 51,186,595 | 52,941,423 | 2 | 0 | 2 | 1 |
| Case 95 | 19 | 52,941,540 | 53,021,543 | 1 | 0 | 1 | 0 |
| Case 95 | 19 | 53,031,533 | 53,225,722 | 2 | 0 | 2 | 1 |
| Case 95 | 19 | 53,232,293 | 53,393,584 | 1 | 0 | 1 | 0 |
| Case 95 | 19 | 53,395,159 | 54,617,836 | 2 | 0 | 2 | 1 |
| Case 95 | 19 | 54,621,969 | 54,704,768 | 7 | 0 | 7 | 1 |
| Case 95 | 19 | 54,707,276 | 58,130,226 | 2 | 0 | 2 | 1 |
| Case 95 | 19 | 58,131,576 | 58,131,623 | 0 | 0 | 0 | 0 |
| Case 95 | 19 | 58,131,669 | 59,097,160 | 2 | 0 | 2 | 1 |
| Case 95 | 20 | 63,244     | 3,686,514  | 2 | 1 | 3 | 0 |
| Case 95 | 20 | 3,686,552  | 3,799,390  | 1 | 1 | 2 | 0 |
| Case 95 | 20 | 3,801,376  | 4,053,254  | 2 | 1 | 3 | 0 |
| Case 95 | 20 | 4,053,690  | 4,277,550  | 2 | 2 | 4 | 0 |
| Case 95 | 20 | 4,277,603  | 10,765,986 | 2 | 1 | 3 | 0 |
| Case 95 | 20 | 10,769,074 | 11,151,237 | 3 | 1 | 4 | 0 |
| Case 95 | 20 | 11,155,202 | 13,562,481 | 2 | 1 | 3 | 0 |
| Case 95 | 20 | 13,565,291 | 14,469,959 | 1 | 1 | 2 | 0 |
| Case 95 | 20 | 14,476,048 | 14,867,228 | 2 | 1 | 3 | 0 |
| Case 95 | 20 | 14,870,398 | 15,160,752 | 1 | 1 | 2 | 0 |
| Case 95 | 20 | 15,161,670 | 17,641,928 | 2 | 1 | 3 | 0 |
| Case 95 | 20 | 17,660,743 | 17,984,594 | 3 | 1 | 4 | 0 |
| Case 95 | 20 | 17,992,979 | 22,266,006 | 2 | 1 | 3 | 0 |
| Case 95 | 20 | 22,267,058 | 22,609,101 | 3 | 1 | 4 | 0 |
| Case 95 | 20 | 22,610,804 | 25,456,830 | 2 | 1 | 3 | 0 |
| Case 95 | 20 | 25,457,022 | 26,293,985 | 1 | 1 | 2 | 0 |
| Case 95 | 20 | 29,425,357 | 29,522,520 | 1 | 1 | 2 | 0 |
| Case 95 | 20 | 29,530,880 | 31,838,520 | 2 | 1 | 3 | 0 |
| Case 95 | 20 | 31,839,058 | 34,806,861 | 3 | 1 | 4 | 0 |
| Case 95 | 20 | 34,807,711 | 35,362,139 | 2 | 1 | 3 | 0 |
| Case 95 | 20 | 35,373,223 | 35,421,971 | 2 | 0 | 2 | 1 |

|         |    |            |            |   |   |   |   |
|---------|----|------------|------------|---|---|---|---|
| Case 95 | 20 | 35,422,550 | 35,507,558 | 1 | 1 | 2 | 0 |
| Case 95 | 20 | 35,507,591 | 35,507,591 | 2 | 0 | 2 | 1 |
| Case 95 | 20 | 35,507,735 | 48,175,598 | 2 | 1 | 3 | 0 |
| Case 95 | 20 | 48,175,678 | 48,488,479 | 3 | 1 | 4 | 0 |
| Case 95 | 20 | 48,489,341 | 60,763,397 | 2 | 1 | 3 | 0 |
| Case 95 | 20 | 60,765,422 | 60,869,680 | 3 | 1 | 4 | 0 |
| Case 95 | 20 | 60,872,280 | 62,948,788 | 2 | 1 | 3 | 0 |
| Case 95 | 21 | 10,827,533 | 10,971,337 | 1 | 1 | 2 | 0 |
| Case 95 | 21 | 14,368,320 | 14,670,124 | 1 | 1 | 2 | 0 |
| Case 95 | 21 | 14,687,571 | 19,771,250 | 2 | 1 | 3 | 0 |
| Case 95 | 21 | 19,775,220 | 19,842,473 | 1 | 1 | 2 | 0 |
| Case 95 | 21 | 19,843,988 | 42,832,541 | 2 | 1 | 3 | 0 |
| Case 95 | 21 | 42,832,638 | 43,120,120 | 3 | 1 | 4 | 0 |
| Case 95 | 21 | 43,121,233 | 45,349,752 | 2 | 1 | 3 | 0 |
| Case 95 | 21 | 45,351,206 | 45,773,729 | 2 | 0 | 2 | 1 |
| Case 95 | 21 | 45,783,999 | 46,816,740 | 2 | 1 | 3 | 0 |
| Case 95 | 21 | 46,817,380 | 46,820,082 | 2 | 0 | 2 | 1 |
| Case 95 | 21 | 46,821,491 | 46,837,709 | 5 | 0 | 5 | 1 |
| Case 95 | 21 | 46,839,625 | 46,930,155 | 2 | 1 | 3 | 0 |
| Case 95 | 21 | 46,930,442 | 46,951,566 | 1 | 1 | 2 | 0 |
| Case 95 | 21 | 46,951,968 | 47,418,347 | 2 | 1 | 3 | 0 |
| Case 95 | 21 | 47,419,012 | 47,439,474 | 1 | 1 | 2 | 0 |
| Case 95 | 21 | 47,440,892 | 47,805,891 | 2 | 1 | 3 | 0 |
| Case 95 | 21 | 47,808,673 | 47,856,021 | 1 | 1 | 2 | 0 |
| Case 95 | 21 | 47,856,909 | 48,100,155 | 2 | 1 | 3 | 0 |
| Case 95 | 22 | 16,114,244 | 23,760,129 | 2 | 1 | 3 | 0 |
| Case 95 | 22 | 23,763,114 | 24,180,578 | 3 | 1 | 4 | 0 |
| Case 95 | 22 | 24,180,585 | 24,237,074 | 2 | 1 | 3 | 0 |
| Case 95 | 22 | 24,240,340 | 24,487,546 | 3 | 1 | 4 | 0 |
| Case 95 | 22 | 24,487,714 | 27,144,107 | 2 | 1 | 3 | 0 |
| Case 95 | 22 | 27,149,053 | 29,704,883 | 1 | 1 | 2 | 0 |
| Case 95 | 22 | 29,706,514 | 29,791,234 | 2 | 1 | 3 | 0 |
| Case 95 | 22 | 29,793,641 | 30,047,732 | 3 | 1 | 4 | 0 |
| Case 95 | 22 | 30,051,433 | 30,051,433 | 2 | 0 | 2 | 1 |
| Case 95 | 22 | 30,051,649 | 30,438,447 | 4 | 0 | 4 | 1 |
| Case 95 | 22 | 30,476,271 | 30,476,271 | 2 | 1 | 3 | 0 |
| Case 95 | 22 | 30,489,945 | 30,614,437 | 3 | 1 | 4 | 0 |
| Case 95 | 22 | 30,618,889 | 31,320,322 | 2 | 1 | 3 | 0 |
| Case 95 | 22 | 31,321,725 | 38,167,706 | 1 | 1 | 2 | 0 |
| Case 95 | 22 | 38,170,046 | 38,369,535 | 2 | 1 | 3 | 0 |
| Case 95 | 22 | 38,369,872 | 38,627,339 | 3 | 1 | 4 | 0 |
| Case 95 | 22 | 38,628,306 | 42,896,474 | 1 | 1 | 2 | 0 |
| Case 95 | 22 | 42,907,619 | 43,284,734 | 2 | 1 | 3 | 0 |
| Case 95 | 22 | 43,287,153 | 45,568,986 | 1 | 1 | 2 | 0 |
| Case 95 | 22 | 45,569,845 | 45,654,844 | 2 | 1 | 3 | 0 |
| Case 95 | 22 | 45,660,094 | 46,172,855 | 1 | 1 | 2 | 0 |
| Case 95 | 22 | 46,175,530 | 46,507,670 | 2 | 1 | 3 | 0 |
| Case 95 | 22 | 46,507,778 | 51,195,728 | 1 | 1 | 2 | 0 |
| Case 96 | 1  | 82,154     | 17,248,532 | 2 | 2 | 4 | 0 |
| Case 96 | 1  | 17,249,161 | 17,281,235 | 2 | 1 | 3 | 0 |
| Case 96 | 1  | 17,281,359 | 72,590,193 | 2 | 2 | 4 | 0 |
| Case 96 | 1  | 72,593,459 | 72,703,860 | 3 | 2 | 5 | 0 |
| Case 96 | 1  | 72,708,541 | 73,221,921 | 4 | 2 | 6 | 0 |
| Case 96 | 1  | 73,227,348 | 74,465,302 | 3 | 2 | 5 | 0 |
| Case 96 | 1  | 74,470,568 | 74,702,475 | 4 | 2 | 6 | 0 |
| Case 96 | 1  | 74,704,513 | 78,245,342 | 3 | 2 | 5 | 0 |
| Case 96 | 1  | 78,254,258 | 79,005,798 | 4 | 2 | 6 | 0 |
| Case 96 | 1  | 79,010,670 | 79,383,604 | 3 | 2 | 5 | 0 |
| Case 96 | 1  | 79,385,958 | 81,892,985 | 4 | 2 | 6 | 0 |
| Case 96 | 1  | 81,895,097 | 82,102,924 | 3 | 2 | 5 | 0 |
| Case 96 | 1  | 82,117,297 | 82,612,212 | 4 | 2 | 6 | 0 |

|         |   |             |             |   |   |   |   |
|---------|---|-------------|-------------|---|---|---|---|
| Case 96 | 1 | 82,648,931  | 82,862,842  | 3 | 2 | 5 | 0 |
| Case 96 | 1 | 82,865,771  | 84,012,000  | 4 | 2 | 6 | 0 |
| Case 96 | 1 | 84,016,320  | 84,225,532  | 3 | 2 | 5 | 0 |
| Case 96 | 1 | 84,232,835  | 84,485,716  | 4 | 2 | 6 | 0 |
| Case 96 | 1 | 84,492,217  | 85,079,410  | 3 | 2 | 5 | 0 |
| Case 96 | 1 | 85,084,120  | 85,239,564  | 4 | 2 | 6 | 0 |
| Case 96 | 1 | 85,242,494  | 85,560,264  | 3 | 2 | 5 | 0 |
| Case 96 | 1 | 85,561,954  | 87,242,062  | 4 | 2 | 6 | 0 |
| Case 96 | 1 | 87,245,278  | 87,696,098  | 3 | 2 | 5 | 0 |
| Case 96 | 1 | 87,698,441  | 89,337,304  | 4 | 2 | 6 | 0 |
| Case 96 | 1 | 89,341,408  | 90,574,778  | 3 | 2 | 5 | 0 |
| Case 96 | 1 | 90,575,147  | 90,925,451  | 4 | 2 | 6 | 0 |
| Case 96 | 1 | 90,928,816  | 91,690,179  | 3 | 2 | 5 | 0 |
| Case 96 | 1 | 91,695,097  | 92,061,160  | 4 | 2 | 6 | 0 |
| Case 96 | 1 | 92,066,310  | 92,525,678  | 3 | 2 | 5 | 0 |
| Case 96 | 1 | 92,530,670  | 92,865,160  | 4 | 2 | 6 | 0 |
| Case 96 | 1 | 92,882,554  | 93,672,827  | 3 | 2 | 5 | 0 |
| Case 96 | 1 | 93,672,840  | 121,346,616 | 2 | 2 | 4 | 0 |
| Case 96 | 1 | 142,649,718 | 249,218,992 | 2 | 2 | 4 | 0 |
| Case 96 | 2 | 18,674      | 1,491,746   | 2 | 2 | 4 | 0 |
| Case 96 | 2 | 1,494,373   | 1,788,847   | 2 | 1 | 3 | 0 |
| Case 96 | 2 | 1,793,809   | 3,329,409   | 2 | 2 | 4 | 0 |
| Case 96 | 2 | 3,340,094   | 3,471,146   | 2 | 1 | 3 | 0 |
| Case 96 | 2 | 3,472,358   | 4,102,330   | 2 | 2 | 4 | 0 |
| Case 96 | 2 | 4,130,779   | 6,692,014   | 2 | 1 | 3 | 0 |
| Case 96 | 2 | 6,694,519   | 7,150,654   | 2 | 2 | 4 | 0 |
| Case 96 | 2 | 7,151,074   | 8,159,830   | 2 | 1 | 3 | 0 |
| Case 96 | 2 | 8,160,356   | 13,202,216  | 2 | 2 | 4 | 0 |
| Case 96 | 2 | 13,204,511  | 15,731,583  | 2 | 1 | 3 | 0 |
| Case 96 | 2 | 15,731,605  | 16,940,144  | 2 | 2 | 4 | 0 |
| Case 96 | 2 | 16,940,157  | 18,044,028  | 2 | 1 | 3 | 0 |
| Case 96 | 2 | 18,046,715  | 23,980,315  | 2 | 2 | 4 | 0 |
| Case 96 | 2 | 23,980,698  | 24,799,847  | 2 | 1 | 3 | 0 |
| Case 96 | 2 | 24,807,533  | 25,055,774  | 2 | 2 | 4 | 0 |
| Case 96 | 2 | 25,057,263  | 25,384,499  | 2 | 1 | 3 | 0 |
| Case 96 | 2 | 25,384,833  | 26,053,166  | 2 | 2 | 4 | 0 |
| Case 96 | 2 | 26,075,213  | 26,537,312  | 2 | 1 | 3 | 0 |
| Case 96 | 2 | 26,537,317  | 27,292,445  | 2 | 2 | 4 | 0 |
| Case 96 | 2 | 27,292,460  | 27,423,371  | 2 | 1 | 3 | 0 |
| Case 96 | 2 | 27,423,913  | 27,481,680  | 2 | 2 | 4 | 0 |
| Case 96 | 2 | 27,481,773  | 27,603,798  | 2 | 1 | 3 | 0 |
| Case 96 | 2 | 27,604,279  | 29,164,343  | 2 | 2 | 4 | 0 |
| Case 96 | 2 | 29,164,387  | 29,380,087  | 2 | 1 | 3 | 0 |
| Case 96 | 2 | 29,382,038  | 31,773,795  | 2 | 2 | 4 | 0 |
| Case 96 | 2 | 31,782,280  | 33,233,715  | 2 | 1 | 3 | 0 |
| Case 96 | 2 | 33,233,902  | 33,525,632  | 2 | 2 | 4 | 0 |
| Case 96 | 2 | 33,527,299  | 36,803,863  | 2 | 1 | 3 | 0 |
| Case 96 | 2 | 36,805,945  | 37,048,522  | 2 | 2 | 4 | 0 |
| Case 96 | 2 | 37,048,724  | 37,855,222  | 2 | 1 | 3 | 0 |
| Case 96 | 2 | 37,855,437  | 38,392,952  | 2 | 2 | 4 | 0 |
| Case 96 | 2 | 38,394,363  | 39,017,670  | 2 | 1 | 3 | 0 |
| Case 96 | 2 | 39,022,911  | 39,242,703  | 2 | 2 | 4 | 0 |
| Case 96 | 2 | 39,243,129  | 39,752,158  | 2 | 1 | 3 | 0 |
| Case 96 | 2 | 39,752,628  | 42,472,677  | 2 | 2 | 4 | 0 |
| Case 96 | 2 | 42,472,708  | 43,458,474  | 2 | 1 | 3 | 0 |
| Case 96 | 2 | 43,460,514  | 43,964,837  | 2 | 2 | 4 | 0 |
| Case 96 | 2 | 43,965,007  | 44,023,025  | 2 | 1 | 3 | 0 |
| Case 96 | 2 | 44,023,035  | 44,109,281  | 2 | 2 | 4 | 0 |
| Case 96 | 2 | 44,112,052  | 44,519,142  | 2 | 1 | 3 | 0 |
| Case 96 | 2 | 44,521,246  | 47,249,055  | 2 | 2 | 4 | 0 |
| Case 96 | 2 | 47,249,239  | 48,807,796  | 2 | 1 | 3 | 0 |

|         |   |             |             |   |   |   |   |
|---------|---|-------------|-------------|---|---|---|---|
| Case 96 | 2 | 48,807,869  | 49,878,657  | 2 | 2 | 4 | 0 |
| Case 96 | 2 | 49,882,063  | 54,420,839  | 2 | 1 | 3 | 0 |
| Case 96 | 2 | 54,424,537  | 55,338,488  | 2 | 2 | 4 | 0 |
| Case 96 | 2 | 55,340,963  | 56,258,347  | 2 | 1 | 3 | 0 |
| Case 96 | 2 | 56,265,789  | 56,403,345  | 2 | 2 | 4 | 0 |
| Case 96 | 2 | 56,408,030  | 58,235,386  | 2 | 1 | 3 | 0 |
| Case 96 | 2 | 58,237,076  | 58,705,069  | 2 | 2 | 4 | 0 |
| Case 96 | 2 | 58,713,430  | 58,981,325  | 2 | 1 | 3 | 0 |
| Case 96 | 2 | 58,984,294  | 60,888,202  | 2 | 2 | 4 | 0 |
| Case 96 | 2 | 60,893,016  | 63,401,230  | 2 | 1 | 3 | 0 |
| Case 96 | 2 | 63,401,820  | 63,943,257  | 2 | 2 | 4 | 0 |
| Case 96 | 2 | 63,962,974  | 64,320,746  | 2 | 1 | 3 | 0 |
| Case 96 | 2 | 64,321,265  | 64,700,471  | 2 | 2 | 4 | 0 |
| Case 96 | 2 | 64,702,082  | 65,486,928  | 2 | 1 | 3 | 0 |
| Case 96 | 2 | 65,490,659  | 66,309,172  | 2 | 2 | 4 | 0 |
| Case 96 | 2 | 66,326,853  | 66,953,286  | 2 | 1 | 3 | 0 |
| Case 96 | 2 | 66,954,363  | 68,026,807  | 2 | 2 | 4 | 0 |
| Case 96 | 2 | 68,027,155  | 68,733,389  | 2 | 1 | 3 | 0 |
| Case 96 | 2 | 68,740,288  | 69,488,673  | 2 | 2 | 4 | 0 |
| Case 96 | 2 | 69,489,816  | 70,483,440  | 2 | 1 | 3 | 0 |
| Case 96 | 2 | 70,488,470  | 71,066,601  | 2 | 2 | 4 | 0 |
| Case 96 | 2 | 71,067,853  | 71,297,695  | 2 | 1 | 3 | 0 |
| Case 96 | 2 | 71,297,922  | 71,395,236  | 2 | 2 | 4 | 0 |
| Case 96 | 2 | 71,403,284  | 71,633,389  | 2 | 1 | 3 | 0 |
| Case 96 | 2 | 71,645,762  | 73,868,736  | 2 | 2 | 4 | 0 |
| Case 96 | 2 | 73,869,666  | 74,202,578  | 2 | 1 | 3 | 0 |
| Case 96 | 2 | 74,210,442  | 75,891,865  | 2 | 2 | 4 | 0 |
| Case 96 | 2 | 75,891,890  | 79,142,387  | 2 | 1 | 3 | 0 |
| Case 96 | 2 | 79,143,946  | 79,761,016  | 2 | 2 | 4 | 0 |
| Case 96 | 2 | 79,766,537  | 84,287,935  | 2 | 1 | 3 | 0 |
| Case 96 | 2 | 84,291,074  | 85,598,568  | 2 | 2 | 4 | 0 |
| Case 96 | 2 | 85,598,640  | 85,709,069  | 2 | 1 | 3 | 0 |
| Case 96 | 2 | 85,723,742  | 85,964,356  | 2 | 2 | 4 | 0 |
| Case 96 | 2 | 85,965,769  | 85,981,436  | 2 | 1 | 3 | 0 |
| Case 96 | 2 | 85,981,877  | 86,023,022  | 3 | 1 | 4 | 0 |
| Case 96 | 2 | 86,023,398  | 88,478,534  | 4 | 1 | 5 | 0 |
| Case 96 | 2 | 88,480,334  | 88,482,473  | 3 | 1 | 4 | 0 |
| Case 96 | 2 | 88,482,486  | 88,916,370  | 2 | 1 | 3 | 0 |
| Case 96 | 2 | 88,919,707  | 92,081,640  | 3 | 1 | 4 | 0 |
| Case 96 | 2 | 95,429,424  | 121,393,032 | 3 | 1 | 4 | 0 |
| Case 96 | 2 | 121,395,161 | 121,741,811 | 2 | 2 | 4 | 0 |
| Case 96 | 2 | 121,742,165 | 127,351,413 | 2 | 1 | 3 | 0 |
| Case 96 | 2 | 127,353,125 | 127,724,610 | 2 | 2 | 4 | 0 |
| Case 96 | 2 | 127,724,850 | 133,314,973 | 2 | 1 | 3 | 0 |
| Case 96 | 2 | 133,320,414 | 134,393,846 | 2 | 2 | 4 | 0 |
| Case 96 | 2 | 134,397,457 | 135,064,269 | 2 | 1 | 3 | 0 |
| Case 96 | 2 | 135,065,943 | 135,483,381 | 2 | 2 | 4 | 0 |
| Case 96 | 2 | 135,483,413 | 137,221,405 | 2 | 1 | 3 | 0 |
| Case 96 | 2 | 137,226,369 | 137,872,992 | 2 | 2 | 4 | 0 |
| Case 96 | 2 | 137,873,347 | 138,593,847 | 2 | 1 | 3 | 0 |
| Case 96 | 2 | 138,600,801 | 138,888,963 | 2 | 2 | 4 | 0 |
| Case 96 | 2 | 138,897,835 | 142,172,028 | 2 | 1 | 3 | 0 |
| Case 96 | 2 | 142,172,366 | 142,498,632 | 1 | 1 | 2 | 0 |
| Case 96 | 2 | 142,500,134 | 148,183,865 | 2 | 1 | 3 | 0 |
| Case 96 | 2 | 148,192,027 | 148,619,746 | 2 | 2 | 4 | 0 |
| Case 96 | 2 | 148,649,175 | 149,847,588 | 2 | 1 | 3 | 0 |
| Case 96 | 2 | 149,853,960 | 150,766,179 | 2 | 2 | 4 | 0 |
| Case 96 | 2 | 150,777,288 | 152,369,315 | 2 | 1 | 3 | 0 |
| Case 96 | 2 | 152,369,326 | 152,534,541 | 2 | 2 | 4 | 0 |
| Case 96 | 2 | 152,534,545 | 157,534,037 | 2 | 1 | 3 | 0 |
| Case 96 | 2 | 157,539,961 | 158,178,075 | 2 | 2 | 4 | 0 |

|         |   |             |             |   |   |   |   |
|---------|---|-------------|-------------|---|---|---|---|
| Case 96 | 2 | 158,178,271 | 158,634,289 | 2 | 1 | 3 | 0 |
| Case 96 | 2 | 158,637,039 | 159,674,622 | 2 | 2 | 4 | 0 |
| Case 96 | 2 | 159,674,805 | 167,760,249 | 2 | 1 | 3 | 0 |
| Case 96 | 2 | 167,760,318 | 239,369,790 | 3 | 1 | 4 | 0 |
| Case 96 | 2 | 239,400,430 | 242,824,974 | 3 | 2 | 5 | 0 |
| Case 96 | 2 | 242,873,800 | 243,048,760 | 3 | 3 | 6 | 0 |
| Case 96 | 3 | 61,495      | 1,293,401   | 2 | 2 | 4 | 0 |
| Case 96 | 3 | 1,293,647   | 1,507,454   | 2 | 1 | 3 | 0 |
| Case 96 | 3 | 1,510,262   | 1,722,281   | 2 | 2 | 4 | 0 |
| Case 96 | 3 | 1,731,173   | 1,829,830   | 2 | 1 | 3 | 0 |
| Case 96 | 3 | 1,833,607   | 9,920,406   | 2 | 2 | 4 | 0 |
| Case 96 | 3 | 9,925,491   | 10,084,828  | 2 | 1 | 3 | 0 |
| Case 96 | 3 | 10,084,831  | 32,578,837  | 2 | 2 | 4 | 0 |
| Case 96 | 3 | 32,586,421  | 32,778,930  | 2 | 1 | 3 | 0 |
| Case 96 | 3 | 32,785,355  | 44,442,007  | 2 | 2 | 4 | 0 |
| Case 96 | 3 | 44,442,054  | 44,784,591  | 2 | 1 | 3 | 0 |
| Case 96 | 3 | 44,795,238  | 46,005,882  | 2 | 2 | 4 | 0 |
| Case 96 | 3 | 46,005,885  | 46,010,078  | 2 | 1 | 3 | 0 |
| Case 96 | 3 | 46,010,113  | 47,452,572  | 2 | 2 | 4 | 0 |
| Case 96 | 3 | 47,452,583  | 47,866,161  | 2 | 1 | 3 | 0 |
| Case 96 | 3 | 47,868,622  | 48,712,791  | 2 | 2 | 4 | 0 |
| Case 96 | 3 | 48,716,065  | 49,050,133  | 2 | 1 | 3 | 0 |
| Case 96 | 3 | 49,050,231  | 49,215,966  | 2 | 2 | 4 | 0 |
| Case 96 | 3 | 49,228,946  | 49,698,316  | 2 | 1 | 3 | 0 |
| Case 96 | 3 | 49,698,498  | 57,419,180  | 2 | 2 | 4 | 0 |
| Case 96 | 3 | 57,419,439  | 57,724,602  | 2 | 1 | 3 | 0 |
| Case 96 | 3 | 57,731,725  | 60,390,846  | 2 | 2 | 4 | 0 |
| Case 96 | 3 | 60,396,850  | 60,592,624  | 2 | 0 | 2 | 1 |
| Case 96 | 3 | 60,592,751  | 60,604,489  | 2 | 1 | 3 | 0 |
| Case 96 | 3 | 60,607,896  | 62,814,528  | 2 | 2 | 4 | 0 |
| Case 96 | 3 | 62,818,566  | 76,633,507  | 3 | 1 | 4 | 0 |
| Case 96 | 3 | 76,636,887  | 79,499,153  | 4 | 1 | 5 | 0 |
| Case 96 | 3 | 79,522,372  | 87,050,997  | 3 | 1 | 4 | 0 |
| Case 96 | 3 | 87,055,061  | 87,525,449  | 2 | 1 | 3 | 0 |
| Case 96 | 3 | 87,525,540  | 88,197,331  | 1 | 1 | 2 | 0 |
| Case 96 | 3 | 88,199,179  | 90,442,925  | 2 | 1 | 3 | 0 |
| Case 96 | 3 | 93,537,290  | 93,546,445  | 2 | 1 | 3 | 0 |
| Case 96 | 3 | 93,548,479  | 103,062,026 | 3 | 1 | 4 | 0 |
| Case 96 | 3 | 103,079,255 | 103,079,255 | 2 | 1 | 3 | 0 |
| Case 96 | 3 | 103,081,830 | 103,094,740 | 1 | 0 | 1 | 0 |
| Case 96 | 3 | 103,097,277 | 140,692,599 | 3 | 1 | 4 | 0 |
| Case 96 | 3 | 140,695,332 | 197,838,262 | 4 | 1 | 5 | 0 |
| Case 96 | 4 | 71,566      | 9,394,090   | 2 | 1 | 3 | 0 |
| Case 96 | 4 | 9,404,812   | 9,595,918   | 1 | 0 | 1 | 0 |
| Case 96 | 4 | 9,596,615   | 49,620,898  | 2 | 1 | 3 | 0 |
| Case 96 | 4 | 52,697,856  | 190,963,766 | 2 | 1 | 3 | 0 |
| Case 96 | 5 | 38,139      | 7,831,992   | 4 | 2 | 6 | 0 |
| Case 96 | 5 | 7,832,048   | 7,832,048   | 3 | 2 | 5 | 0 |
| Case 96 | 5 | 7,832,052   | 7,832,129   | 2 | 2 | 4 | 0 |
| Case 96 | 5 | 7,832,387   | 7,832,387   | 2 | 1 | 3 | 0 |
| Case 96 | 5 | 7,835,500   | 10,109,791  | 4 | 3 | 7 | 0 |
| Case 96 | 5 | 10,111,180  | 10,127,557  | 5 | 1 | 6 | 0 |
| Case 96 | 5 | 10,132,963  | 10,224,631  | 7 | 0 | 7 | 1 |
| Case 96 | 5 | 10,226,839  | 11,378,282  | 4 | 2 | 6 | 0 |
| Case 96 | 5 | 11,378,817  | 11,378,817  | 5 | 2 | 7 | 0 |
| Case 96 | 5 | 11,380,155  | 11,381,138  | 3 | 2 | 5 | 0 |
| Case 96 | 5 | 11,390,193  | 13,922,302  | 5 | 2 | 7 | 0 |
| Case 96 | 5 | 13,923,445  | 13,923,485  | 3 | 2 | 5 | 0 |
| Case 96 | 5 | 13,923,528  | 15,684,270  | 4 | 2 | 6 | 0 |
| Case 96 | 5 | 15,685,126  | 24,770,890  | 3 | 3 | 6 | 0 |
| Case 96 | 5 | 24,773,509  | 24,773,509  | 3 | 1 | 4 | 0 |

|         |   |             |             |   |   |   |   |
|---------|---|-------------|-------------|---|---|---|---|
| Case 96 | 5 | 24,775,002  | 24,775,002  | 2 | 1 | 3 | 0 |
| Case 96 | 5 | 24,779,565  | 31,177,469  | 4 | 3 | 7 | 0 |
| Case 96 | 5 | 31,177,628  | 31,188,433  | 5 | 1 | 6 | 0 |
| Case 96 | 5 | 31,191,910  | 31,204,843  | 4 | 3 | 7 | 0 |
| Case 96 | 5 | 31,205,335  | 31,281,799  | 7 | 0 | 7 | 1 |
| Case 96 | 5 | 31,283,826  | 35,600,210  | 4 | 2 | 6 | 0 |
| Case 96 | 5 | 35,608,310  | 46,399,093  | 3 | 3 | 6 | 0 |
| Case 96 | 5 | 49,457,282  | 52,013,727  | 3 | 1 | 4 | 0 |
| Case 96 | 5 | 52,024,627  | 52,133,266  | 4 | 1 | 5 | 0 |
| Case 96 | 5 | 52,135,210  | 56,811,700  | 3 | 1 | 4 | 0 |
| Case 96 | 5 | 56,811,719  | 57,868,045  | 4 | 1 | 5 | 0 |
| Case 96 | 5 | 57,878,858  | 57,940,720  | 3 | 1 | 4 | 0 |
| Case 96 | 5 | 57,941,910  | 61,436,505  | 4 | 0 | 4 | 1 |
| Case 96 | 5 | 61,437,645  | 61,721,917  | 3 | 0 | 3 | 1 |
| Case 96 | 5 | 61,728,012  | 63,256,799  | 4 | 0 | 4 | 1 |
| Case 96 | 5 | 63,256,888  | 63,753,398  | 3 | 0 | 3 | 1 |
| Case 96 | 5 | 63,769,508  | 68,565,120  | 4 | 0 | 4 | 1 |
| Case 96 | 5 | 68,568,858  | 70,986,022  | 3 | 1 | 4 | 0 |
| Case 96 | 5 | 70,986,475  | 71,204,261  | 4 | 1 | 5 | 0 |
| Case 96 | 5 | 71,208,228  | 71,369,445  | 3 | 1 | 4 | 0 |
| Case 96 | 5 | 71,372,881  | 71,462,632  | 4 | 1 | 5 | 0 |
| Case 96 | 5 | 71,467,670  | 71,521,964  | 3 | 1 | 4 | 0 |
| Case 96 | 5 | 71,524,160  | 72,313,066  | 4 | 1 | 5 | 0 |
| Case 96 | 5 | 72,313,079  | 72,541,096  | 3 | 1 | 4 | 0 |
| Case 96 | 5 | 72,546,478  | 106,957,027 | 3 | 0 | 3 | 1 |
| Case 96 | 5 | 106,958,958 | 110,658,834 | 2 | 2 | 4 | 0 |
| Case 96 | 5 | 110,677,604 | 116,329,875 | 3 | 1 | 4 | 0 |
| Case 96 | 5 | 116,355,602 | 116,993,837 | 2 | 1 | 3 | 0 |
| Case 96 | 5 | 117,005,392 | 121,032,141 | 3 | 1 | 4 | 0 |
| Case 96 | 5 | 121,038,138 | 129,408,800 | 3 | 0 | 3 | 1 |
| Case 96 | 5 | 129,412,126 | 130,390,644 | 3 | 1 | 4 | 0 |
| Case 96 | 5 | 130,407,827 | 131,125,988 | 2 | 1 | 3 | 0 |
| Case 96 | 5 | 131,195,002 | 133,944,277 | 3 | 1 | 4 | 0 |
| Case 96 | 5 | 133,959,630 | 134,239,350 | 3 | 0 | 3 | 1 |
| Case 96 | 5 | 134,240,235 | 135,825,418 | 3 | 1 | 4 | 0 |
| Case 96 | 5 | 135,825,647 | 136,324,179 | 4 | 1 | 5 | 0 |
| Case 96 | 5 | 136,324,207 | 139,290,054 | 3 | 1 | 4 | 0 |
| Case 96 | 5 | 139,293,166 | 140,236,189 | 4 | 0 | 4 | 1 |
| Case 96 | 5 | 140,236,328 | 141,855,300 | 3 | 1 | 4 | 0 |
| Case 96 | 5 | 141,856,176 | 142,490,003 | 4 | 1 | 5 | 0 |
| Case 96 | 5 | 142,500,344 | 142,782,981 | 3 | 1 | 4 | 0 |
| Case 96 | 5 | 142,783,602 | 143,545,150 | 4 | 1 | 5 | 0 |
| Case 96 | 5 | 143,549,496 | 143,856,528 | 3 | 1 | 4 | 0 |
| Case 96 | 5 | 143,860,437 | 144,924,901 | 4 | 1 | 5 | 0 |
| Case 96 | 5 | 144,926,951 | 144,989,671 | 3 | 1 | 4 | 0 |
| Case 96 | 5 | 145,003,254 | 161,865,725 | 4 | 0 | 4 | 1 |
| Case 96 | 5 | 161,866,702 | 162,245,076 | 3 | 0 | 3 | 1 |
| Case 96 | 5 | 162,245,529 | 180,693,127 | 4 | 0 | 4 | 1 |
| Case 96 | 6 | 108,666     | 20,911,003  | 4 | 0 | 4 | 1 |
| Case 96 | 6 | 20,940,379  | 20,952,163  | 3 | 0 | 3 | 1 |
| Case 96 | 6 | 20,954,826  | 21,084,430  | 2 | 0 | 2 | 1 |
| Case 96 | 6 | 21,086,047  | 21,279,870  | 3 | 0 | 3 | 1 |
| Case 96 | 6 | 21,281,316  | 31,355,702  | 4 | 0 | 4 | 1 |
| Case 96 | 6 | 31,356,574  | 31,378,510  | 0 | 0 | 0 | 0 |
| Case 96 | 6 | 31,378,575  | 31,378,965  | 4 | 0 | 4 | 1 |
| Case 96 | 6 | 31,379,016  | 31,453,640  | 0 | 0 | 0 | 0 |
| Case 96 | 6 | 31,456,567  | 32,367,259  | 4 | 0 | 4 | 1 |
| Case 96 | 6 | 32,367,451  | 32,370,993  | 3 | 0 | 3 | 1 |
| Case 96 | 6 | 32,371,179  | 37,990,758  | 4 | 0 | 4 | 1 |
| Case 96 | 6 | 37,999,223  | 38,139,500  | 3 | 1 | 4 | 0 |
| Case 96 | 6 | 38,139,945  | 41,605,830  | 5 | 0 | 5 | 1 |



|         |   |            |             |   |   |   |   |
|---------|---|------------|-------------|---|---|---|---|
| Case 96 | 6 | 41,608,938 | 41,608,938  | 6 | 1 | 7 | 0 |
| Case 96 | 6 | 41,609,220 | 41,652,566  | 3 | 1 | 4 | 0 |
| Case 96 | 6 | 41,655,542 | 43,572,467  | 4 | 0 | 4 | 1 |
| Case 96 | 6 | 43,578,397 | 43,623,326  | 3 | 1 | 4 | 0 |
| Case 96 | 6 | 43,623,417 | 44,134,522  | 5 | 0 | 5 | 1 |
| Case 96 | 6 | 44,134,540 | 44,134,540  | 6 | 1 | 7 | 0 |
| Case 96 | 6 | 44,134,864 | 44,140,054  | 3 | 1 | 4 | 0 |
| Case 96 | 6 | 44,140,275 | 54,460,573  | 4 | 0 | 4 | 1 |
| Case 96 | 6 | 54,460,646 | 58,752,089  | 3 | 0 | 3 | 1 |
| Case 96 | 6 | 61,891,118 | 61,970,201  | 3 | 0 | 3 | 1 |
| Case 96 | 6 | 61,972,502 | 78,965,525  | 2 | 1 | 3 | 0 |
| Case 96 | 6 | 78,972,930 | 79,029,367  | 1 | 0 | 1 | 0 |
| Case 96 | 6 | 79,039,234 | 170,980,171 | 2 | 1 | 3 | 0 |
| Case 96 | 7 | 44,935     | 869,846     | 3 | 2 | 5 | 0 |
| Case 96 | 7 | 871,728    | 1,034,717   | 2 | 2 | 4 | 0 |
| Case 96 | 7 | 1,034,903  | 1,203,841   | 3 | 2 | 5 | 0 |
| Case 96 | 7 | 1,203,957  | 3,248,674   | 2 | 2 | 4 | 0 |
| Case 96 | 7 | 3,251,558  | 3,982,653   | 3 | 2 | 5 | 0 |
| Case 96 | 7 | 3,983,402  | 6,743,097   | 2 | 2 | 4 | 0 |
| Case 96 | 7 | 6,744,957  | 15,045,529  | 3 | 2 | 5 | 0 |
| Case 96 | 7 | 15,048,069 | 15,129,953  | 2 | 2 | 4 | 0 |
| Case 96 | 7 | 15,131,687 | 20,735,885  | 3 | 2 | 5 | 0 |
| Case 96 | 7 | 20,736,577 | 20,821,273  | 2 | 2 | 4 | 0 |
| Case 96 | 7 | 20,825,213 | 21,775,369  | 3 | 2 | 5 | 0 |
| Case 96 | 7 | 21,775,387 | 21,945,563  | 2 | 2 | 4 | 0 |
| Case 96 | 7 | 21,945,687 | 22,107,371  | 3 | 2 | 5 | 0 |
| Case 96 | 7 | 22,108,059 | 22,311,651  | 2 | 2 | 4 | 0 |
| Case 96 | 7 | 22,312,065 | 23,224,734  | 3 | 2 | 5 | 0 |
| Case 96 | 7 | 23,224,752 | 23,353,310  | 2 | 2 | 4 | 0 |
| Case 96 | 7 | 23,354,413 | 26,930,638  | 3 | 2 | 5 | 0 |
| Case 96 | 7 | 26,938,809 | 27,220,831  | 2 | 2 | 4 | 0 |
| Case 96 | 7 | 27,223,563 | 29,668,519  | 3 | 2 | 5 | 0 |
| Case 96 | 7 | 29,668,591 | 30,210,227  | 2 | 2 | 4 | 0 |
| Case 96 | 7 | 30,211,222 | 32,105,096  | 3 | 2 | 5 | 0 |
| Case 96 | 7 | 32,110,008 | 32,447,350  | 2 | 2 | 4 | 0 |
| Case 96 | 7 | 32,447,684 | 36,659,892  | 3 | 2 | 5 | 0 |
| Case 96 | 7 | 36,660,968 | 36,979,876  | 2 | 2 | 4 | 0 |
| Case 96 | 7 | 36,981,343 | 39,093,780  | 3 | 2 | 5 | 0 |
| Case 96 | 7 | 39,096,388 | 40,586,674  | 2 | 2 | 4 | 0 |
| Case 96 | 7 | 40,607,390 | 41,472,272  | 3 | 2 | 5 | 0 |
| Case 96 | 7 | 41,473,995 | 41,750,087  | 2 | 2 | 4 | 0 |
| Case 96 | 7 | 41,752,051 | 43,254,706  | 3 | 2 | 5 | 0 |
| Case 96 | 7 | 43,256,590 | 43,517,171  | 2 | 2 | 4 | 0 |
| Case 96 | 7 | 43,519,337 | 43,801,983  | 3 | 2 | 5 | 0 |
| Case 96 | 7 | 43,804,695 | 45,247,913  | 2 | 2 | 4 | 0 |
| Case 96 | 7 | 45,248,202 | 45,953,573  | 3 | 2 | 5 | 0 |
| Case 96 | 7 | 45,954,465 | 46,113,883  | 2 | 2 | 4 | 0 |
| Case 96 | 7 | 46,116,722 | 47,849,094  | 3 | 2 | 5 | 0 |
| Case 96 | 7 | 47,849,120 | 48,026,823  | 2 | 2 | 4 | 0 |
| Case 96 | 7 | 48,026,965 | 48,319,307  | 3 | 2 | 5 | 0 |
| Case 96 | 7 | 48,319,403 | 48,457,486  | 2 | 2 | 4 | 0 |
| Case 96 | 7 | 48,457,628 | 53,063,823  | 3 | 2 | 5 | 0 |
| Case 96 | 7 | 53,064,379 | 53,306,008  | 2 | 2 | 4 | 0 |
| Case 96 | 7 | 53,308,306 | 55,238,226  | 3 | 2 | 5 | 0 |
| Case 96 | 7 | 55,238,227 | 58,019,061  | 2 | 2 | 4 | 0 |
| Case 96 | 7 | 61,056,053 | 66,865,643  | 2 | 2 | 4 | 0 |
| Case 96 | 7 | 66,877,880 | 67,098,945  | 3 | 2 | 5 | 0 |
| Case 96 | 7 | 67,102,353 | 76,307,066  | 2 | 2 | 4 | 0 |
| Case 96 | 7 | 76,309,742 | 82,450,364  | 3 | 2 | 5 | 0 |
| Case 96 | 7 | 82,451,558 | 82,811,218  | 2 | 2 | 4 | 0 |
| Case 96 | 7 | 82,817,384 | 83,421,885  | 3 | 2 | 5 | 0 |

|         |   |             |             |   |   |   |   |
|---------|---|-------------|-------------|---|---|---|---|
| Case 96 | 7 | 83,422,832  | 85,813,923  | 2 | 2 | 4 | 0 |
| Case 96 | 7 | 85,814,138  | 86,106,885  | 3 | 2 | 5 | 0 |
| Case 96 | 7 | 86,107,620  | 86,995,922  | 2 | 2 | 4 | 0 |
| Case 96 | 7 | 86,995,999  | 88,955,550  | 3 | 2 | 5 | 0 |
| Case 96 | 7 | 88,956,699  | 88,981,054  | 2 | 2 | 4 | 0 |
| Case 96 | 7 | 88,995,297  | 90,006,840  | 3 | 2 | 5 | 0 |
| Case 96 | 7 | 90,013,087  | 90,497,437  | 2 | 2 | 4 | 0 |
| Case 96 | 7 | 90,500,326  | 91,174,263  | 3 | 2 | 5 | 0 |
| Case 96 | 7 | 91,176,242  | 91,768,615  | 2 | 2 | 4 | 0 |
| Case 96 | 7 | 91,771,690  | 96,401,045  | 3 | 2 | 5 | 0 |
| Case 96 | 7 | 96,407,773  | 96,968,676  | 2 | 2 | 4 | 0 |
| Case 96 | 7 | 96,968,805  | 97,494,722  | 3 | 2 | 5 | 0 |
| Case 96 | 7 | 97,496,179  | 99,170,711  | 2 | 2 | 4 | 0 |
| Case 96 | 7 | 99,170,965  | 99,474,016  | 3 | 2 | 5 | 0 |
| Case 96 | 7 | 99,474,143  | 102,334,106 | 2 | 2 | 4 | 0 |
| Case 96 | 7 | 102,375,663 | 104,461,230 | 3 | 2 | 5 | 0 |
| Case 96 | 7 | 104,466,964 | 105,360,021 | 2 | 2 | 4 | 0 |
| Case 96 | 7 | 105,361,835 | 106,128,329 | 3 | 2 | 5 | 0 |
| Case 96 | 7 | 106,129,804 | 107,948,721 | 2 | 2 | 4 | 0 |
| Case 96 | 7 | 107,949,595 | 110,172,394 | 3 | 2 | 5 | 0 |
| Case 96 | 7 | 110,174,041 | 111,183,610 | 2 | 2 | 4 | 0 |
| Case 96 | 7 | 111,199,771 | 111,329,336 | 2 | 0 | 2 | 1 |
| Case 96 | 7 | 111,333,872 | 111,426,682 | 3 | 0 | 3 | 1 |
| Case 96 | 7 | 111,429,882 | 111,732,480 | 2 | 0 | 2 | 1 |
| Case 96 | 7 | 111,732,556 | 111,785,581 | 3 | 0 | 3 | 1 |
| Case 96 | 7 | 111,785,993 | 113,646,277 | 2 | 0 | 2 | 1 |
| Case 96 | 7 | 113,649,625 | 139,584,796 | 3 | 0 | 3 | 1 |
| Case 96 | 7 | 139,585,476 | 139,618,876 | 4 | 0 | 4 | 1 |
| Case 96 | 7 | 139,620,219 | 144,113,853 | 3 | 0 | 3 | 1 |
| Case 96 | 7 | 144,114,122 | 147,870,469 | 2 | 0 | 2 | 1 |
| Case 96 | 7 | 147,872,505 | 148,143,416 | 3 | 0 | 3 | 1 |
| Case 96 | 7 | 148,153,437 | 149,145,139 | 2 | 0 | 2 | 1 |
| Case 96 | 7 | 149,148,159 | 149,367,798 | 3 | 0 | 3 | 1 |
| Case 96 | 7 | 149,379,276 | 149,576,735 | 2 | 0 | 2 | 1 |
| Case 96 | 7 | 149,576,740 | 149,983,201 | 3 | 0 | 3 | 1 |
| Case 96 | 7 | 149,992,342 | 150,081,485 | 2 | 0 | 2 | 1 |
| Case 96 | 7 | 150,084,460 | 150,555,915 | 3 | 0 | 3 | 1 |
| Case 96 | 7 | 150,555,967 | 150,708,923 | 2 | 0 | 2 | 1 |
| Case 96 | 7 | 150,709,291 | 150,755,839 | 3 | 0 | 3 | 1 |
| Case 96 | 7 | 150,761,314 | 150,800,739 | 2 | 0 | 2 | 1 |
| Case 96 | 7 | 150,801,238 | 150,845,977 | 3 | 0 | 3 | 1 |
| Case 96 | 7 | 150,846,022 | 150,883,761 | 2 | 0 | 2 | 1 |
| Case 96 | 7 | 150,883,892 | 151,945,694 | 3 | 0 | 3 | 1 |
| Case 96 | 7 | 151,946,979 | 152,669,840 | 2 | 0 | 2 | 1 |
| Case 96 | 7 | 152,677,202 | 152,844,101 | 3 | 0 | 3 | 1 |
| Case 96 | 7 | 152,845,216 | 153,624,869 | 2 | 0 | 2 | 1 |
| Case 96 | 7 | 153,625,843 | 154,122,060 | 3 | 0 | 3 | 1 |
| Case 96 | 7 | 154,129,140 | 154,377,155 | 2 | 0 | 2 | 1 |
| Case 96 | 7 | 154,378,331 | 154,643,901 | 3 | 0 | 3 | 1 |
| Case 96 | 7 | 154,645,406 | 154,673,469 | 2 | 0 | 2 | 1 |
| Case 96 | 7 | 154,673,686 | 154,905,252 | 3 | 0 | 3 | 1 |
| Case 96 | 7 | 154,905,319 | 154,977,756 | 2 | 0 | 2 | 1 |
| Case 96 | 7 | 154,977,941 | 156,469,123 | 3 | 0 | 3 | 1 |
| Case 96 | 7 | 156,469,173 | 156,732,717 | 2 | 0 | 2 | 1 |
| Case 96 | 7 | 156,736,705 | 157,926,406 | 3 | 0 | 3 | 1 |
| Case 96 | 7 | 157,926,436 | 158,498,994 | 2 | 0 | 2 | 1 |
| Case 96 | 7 | 158,500,805 | 159,119,486 | 3 | 0 | 3 | 1 |
| Case 96 | 8 | 164,984     | 195,481     | 2 | 1 | 3 | 0 |
| Case 96 | 8 | 195,607     | 202,842     | 1 | 1 | 2 | 0 |
| Case 96 | 8 | 209,152     | 1,849,398   | 2 | 1 | 3 | 0 |
| Case 96 | 8 | 1,849,530   | 1,880,530   | 2 | 0 | 2 | 1 |

|         |   |            |            |   |   |   |   |
|---------|---|------------|------------|---|---|---|---|
| Case 96 | 8 | 1,881,984  | 2,781,277  | 2 | 1 | 3 | 0 |
| Case 96 | 8 | 2,783,183  | 2,990,263  | 1 | 1 | 2 | 0 |
| Case 96 | 8 | 2,995,761  | 3,052,978  | 2 | 1 | 3 | 0 |
| Case 96 | 8 | 3,053,592  | 3,074,711  | 1 | 1 | 2 | 0 |
| Case 96 | 8 | 3,076,897  | 3,178,721  | 2 | 1 | 3 | 0 |
| Case 96 | 8 | 3,179,320  | 3,274,215  | 1 | 1 | 2 | 0 |
| Case 96 | 8 | 3,275,113  | 3,390,144  | 2 | 1 | 3 | 0 |
| Case 96 | 8 | 3,390,607  | 3,523,100  | 1 | 1 | 2 | 0 |
| Case 96 | 8 | 3,527,105  | 3,565,900  | 2 | 1 | 3 | 0 |
| Case 96 | 8 | 3,566,615  | 3,621,844  | 1 | 1 | 2 | 0 |
| Case 96 | 8 | 3,622,059  | 3,872,987  | 2 | 1 | 3 | 0 |
| Case 96 | 8 | 3,874,384  | 3,895,072  | 1 | 1 | 2 | 0 |
| Case 96 | 8 | 3,896,625  | 4,065,529  | 2 | 1 | 3 | 0 |
| Case 96 | 8 | 4,066,831  | 4,320,656  | 1 | 1 | 2 | 0 |
| Case 96 | 8 | 4,320,749  | 4,444,592  | 2 | 1 | 3 | 0 |
| Case 96 | 8 | 4,445,174  | 4,647,032  | 1 | 1 | 2 | 0 |
| Case 96 | 8 | 4,647,134  | 4,702,233  | 2 | 1 | 3 | 0 |
| Case 96 | 8 | 4,705,811  | 4,834,406  | 1 | 1 | 2 | 0 |
| Case 96 | 8 | 4,835,344  | 5,165,467  | 2 | 1 | 3 | 0 |
| Case 96 | 8 | 5,165,806  | 5,204,568  | 1 | 1 | 2 | 0 |
| Case 96 | 8 | 5,206,751  | 5,231,014  | 2 | 1 | 3 | 0 |
| Case 96 | 8 | 5,237,620  | 5,339,713  | 1 | 1 | 2 | 0 |
| Case 96 | 8 | 5,340,264  | 5,393,748  | 2 | 1 | 3 | 0 |
| Case 96 | 8 | 5,393,862  | 7,726,969  | 7 | 0 | 7 | 1 |
| Case 96 | 8 | 7,881,478  | 8,748,594  | 5 | 1 | 6 | 0 |
| Case 96 | 8 | 8,748,849  | 9,428,688  | 6 | 1 | 7 | 0 |
| Case 96 | 8 | 9,437,352  | 9,685,362  | 7 | 0 | 7 | 1 |
| Case 96 | 8 | 9,688,094  | 10,118,004 | 2 | 1 | 3 | 0 |
| Case 96 | 8 | 10,118,346 | 10,118,346 | 2 | 2 | 4 | 0 |
| Case 96 | 8 | 10,119,523 | 11,058,478 | 6 | 1 | 7 | 0 |
| Case 96 | 8 | 11,060,638 | 15,491,989 | 7 | 0 | 7 | 1 |
| Case 96 | 8 | 15,493,417 | 15,898,666 | 5 | 1 | 6 | 0 |
| Case 96 | 8 | 15,899,688 | 17,159,766 | 6 | 1 | 7 | 0 |
| Case 96 | 8 | 17,159,767 | 17,166,765 | 7 | 0 | 7 | 1 |
| Case 96 | 8 | 17,168,025 | 17,643,685 | 5 | 1 | 6 | 0 |
| Case 96 | 8 | 17,645,028 | 17,918,527 | 6 | 1 | 7 | 0 |
| Case 96 | 8 | 17,918,934 | 17,924,735 | 7 | 0 | 7 | 1 |
| Case 96 | 8 | 17,924,739 | 20,381,833 | 5 | 1 | 6 | 0 |
| Case 96 | 8 | 20,390,625 | 20,521,191 | 7 | 0 | 7 | 1 |
| Case 96 | 8 | 20,525,787 | 22,172,605 | 5 | 1 | 6 | 0 |
| Case 96 | 8 | 22,172,702 | 22,333,014 | 7 | 0 | 7 | 1 |
| Case 96 | 8 | 22,333,041 | 23,602,802 | 5 | 1 | 6 | 0 |
| Case 96 | 8 | 23,607,733 | 26,001,404 | 3 | 1 | 4 | 0 |
| Case 96 | 8 | 26,002,358 | 27,022,315 | 5 | 1 | 6 | 0 |
| Case 96 | 8 | 27,030,123 | 28,198,716 | 7 | 0 | 7 | 1 |
| Case 96 | 8 | 28,200,685 | 28,272,574 | 5 | 1 | 6 | 0 |
| Case 96 | 8 | 28,280,338 | 29,441,961 | 6 | 1 | 7 | 0 |
| Case 96 | 8 | 29,443,591 | 31,474,141 | 7 | 0 | 7 | 1 |
| Case 96 | 8 | 31,478,718 | 32,549,845 | 5 | 1 | 6 | 0 |
| Case 96 | 8 | 32,559,943 | 33,357,994 | 7 | 0 | 7 | 1 |
| Case 96 | 8 | 33,358,270 | 33,466,724 | 5 | 1 | 6 | 0 |
| Case 96 | 8 | 33,467,010 | 43,791,691 | 3 | 1 | 4 | 0 |
| Case 96 | 8 | 46,886,735 | 70,813,658 | 3 | 1 | 4 | 0 |
| Case 96 | 8 | 70,815,981 | 70,919,503 | 2 | 1 | 3 | 0 |
| Case 96 | 8 | 70,926,678 | 73,379,450 | 2 | 2 | 4 | 0 |
| Case 96 | 8 | 73,384,265 | 78,770,472 | 3 | 1 | 4 | 0 |
| Case 96 | 8 | 78,774,883 | 81,195,187 | 2 | 2 | 4 | 0 |
| Case 96 | 8 | 81,197,858 | 81,430,806 | 2 | 1 | 3 | 0 |
| Case 96 | 8 | 81,431,696 | 89,051,297 | 3 | 1 | 4 | 0 |
| Case 96 | 8 | 89,056,569 | 90,637,625 | 2 | 2 | 4 | 0 |
| Case 96 | 8 | 90,638,201 | 94,311,248 | 3 | 1 | 4 | 0 |

|         |   |             |             |   |   |   |   |
|---------|---|-------------|-------------|---|---|---|---|
| Case 96 | 8 | 94,313,865  | 96,533,604  | 2 | 2 | 4 | 0 |
| Case 96 | 8 | 96,534,806  | 112,740,051 | 3 | 1 | 4 | 0 |
| Case 96 | 8 | 112,740,847 | 137,321,806 | 4 | 1 | 5 | 0 |
| Case 96 | 8 | 137,338,230 | 137,346,996 | 3 | 1 | 4 | 0 |
| Case 96 | 8 | 137,350,456 | 138,075,823 | 4 | 0 | 4 | 1 |
| Case 96 | 8 | 138,081,290 | 138,116,658 | 3 | 1 | 4 | 0 |
| Case 96 | 8 | 138,121,678 | 146,293,414 | 4 | 1 | 5 | 0 |
| Case 96 | 9 | 46,587      | 304,957     | 3 | 0 | 3 | 1 |
| Case 96 | 9 | 305,667     | 707,463     | 2 | 0 | 2 | 1 |
| Case 96 | 9 | 710,818     | 742,206     | 3 | 0 | 3 | 1 |
| Case 96 | 9 | 742,230     | 990,076     | 2 | 0 | 2 | 1 |
| Case 96 | 9 | 990,085     | 1,056,975   | 3 | 0 | 3 | 1 |
| Case 96 | 9 | 1,057,116   | 1,243,842   | 2 | 0 | 2 | 1 |
| Case 96 | 9 | 1,252,572   | 1,311,050   | 3 | 0 | 3 | 1 |
| Case 96 | 9 | 1,311,310   | 1,675,540   | 2 | 0 | 2 | 1 |
| Case 96 | 9 | 1,676,766   | 1,801,822   | 3 | 0 | 3 | 1 |
| Case 96 | 9 | 1,809,976   | 2,137,725   | 2 | 0 | 2 | 1 |
| Case 96 | 9 | 2,141,357   | 2,196,183   | 3 | 0 | 3 | 1 |
| Case 96 | 9 | 2,196,566   | 2,210,993   | 2 | 0 | 2 | 1 |
| Case 96 | 9 | 2,212,546   | 2,275,029   | 3 | 0 | 3 | 1 |
| Case 96 | 9 | 2,282,951   | 2,622,278   | 2 | 0 | 2 | 1 |
| Case 96 | 9 | 2,623,615   | 2,648,773   | 3 | 0 | 3 | 1 |
| Case 96 | 9 | 2,649,217   | 2,811,377   | 2 | 0 | 2 | 1 |
| Case 96 | 9 | 2,811,418   | 3,046,849   | 3 | 0 | 3 | 1 |
| Case 96 | 9 | 3,049,080   | 3,755,135   | 2 | 0 | 2 | 1 |
| Case 96 | 9 | 3,755,938   | 3,861,266   | 3 | 0 | 3 | 1 |
| Case 96 | 9 | 3,862,693   | 4,002,823   | 2 | 0 | 2 | 1 |
| Case 96 | 9 | 4,005,108   | 4,193,531   | 3 | 0 | 3 | 1 |
| Case 96 | 9 | 4,194,762   | 4,286,392   | 2 | 0 | 2 | 1 |
| Case 96 | 9 | 4,287,179   | 4,378,727   | 3 | 0 | 3 | 1 |
| Case 96 | 9 | 4,380,096   | 4,502,575   | 2 | 0 | 2 | 1 |
| Case 96 | 9 | 4,505,544   | 4,719,182   | 3 | 0 | 3 | 1 |
| Case 96 | 9 | 4,720,263   | 5,462,929   | 2 | 0 | 2 | 1 |
| Case 96 | 9 | 5,464,065   | 5,534,930   | 3 | 0 | 3 | 1 |
| Case 96 | 9 | 5,544,405   | 5,899,749   | 2 | 0 | 2 | 1 |
| Case 96 | 9 | 5,901,100   | 5,922,860   | 3 | 0 | 3 | 1 |
| Case 96 | 9 | 5,923,103   | 7,185,027   | 2 | 0 | 2 | 1 |
| Case 96 | 9 | 7,187,799   | 7,245,314   | 3 | 0 | 3 | 1 |
| Case 96 | 9 | 7,245,681   | 8,474,233   | 2 | 0 | 2 | 1 |
| Case 96 | 9 | 8,476,994   | 8,486,299   | 3 | 0 | 3 | 1 |
| Case 96 | 9 | 8,486,335   | 13,979,872  | 2 | 0 | 2 | 1 |
| Case 96 | 9 | 13,980,085  | 14,036,242  | 3 | 0 | 3 | 1 |
| Case 96 | 9 | 14,036,271  | 14,309,552  | 2 | 0 | 2 | 1 |
| Case 96 | 9 | 14,310,504  | 14,437,943  | 3 | 0 | 3 | 1 |
| Case 96 | 9 | 14,440,552  | 16,063,191  | 2 | 0 | 2 | 1 |
| Case 96 | 9 | 16,064,646  | 16,313,409  | 3 | 0 | 3 | 1 |
| Case 96 | 9 | 16,314,909  | 16,398,279  | 2 | 0 | 2 | 1 |
| Case 96 | 9 | 16,399,927  | 16,572,826  | 3 | 0 | 3 | 1 |
| Case 96 | 9 | 16,573,685  | 18,061,140  | 2 | 0 | 2 | 1 |
| Case 96 | 9 | 18,066,074  | 18,155,747  | 3 | 0 | 3 | 1 |
| Case 96 | 9 | 18,161,098  | 18,676,496  | 2 | 0 | 2 | 1 |
| Case 96 | 9 | 18,676,945  | 18,847,325  | 3 | 0 | 3 | 1 |
| Case 96 | 9 | 18,848,066  | 18,903,625  | 2 | 0 | 2 | 1 |
| Case 96 | 9 | 18,905,289  | 18,974,072  | 3 | 0 | 3 | 1 |
| Case 96 | 9 | 18,978,625  | 19,057,965  | 2 | 0 | 2 | 1 |
| Case 96 | 9 | 19,058,204  | 19,063,081  | 3 | 0 | 3 | 1 |
| Case 96 | 9 | 19,065,295  | 19,746,160  | 2 | 0 | 2 | 1 |
| Case 96 | 9 | 19,751,159  | 20,005,735  | 3 | 0 | 3 | 1 |
| Case 96 | 9 | 20,006,704  | 27,179,530  | 2 | 0 | 2 | 1 |
| Case 96 | 9 | 27,182,802  | 27,229,786  | 3 | 0 | 3 | 1 |
| Case 96 | 9 | 27,230,152  | 27,401,297  | 2 | 0 | 2 | 1 |

|         |    |             |             |   |   |   |   |
|---------|----|-------------|-------------|---|---|---|---|
| Case 96 | 9  | 27,402,961  | 27,490,967  | 3 | 0 | 3 | 1 |
| Case 96 | 9  | 27,497,792  | 27,792,965  | 2 | 0 | 2 | 1 |
| Case 96 | 9  | 27,800,007  | 27,979,665  | 3 | 0 | 3 | 1 |
| Case 96 | 9  | 27,980,241  | 32,601,501  | 2 | 0 | 2 | 1 |
| Case 96 | 9  | 32,607,492  | 32,917,428  | 3 | 0 | 3 | 1 |
| Case 96 | 9  | 32,921,928  | 32,989,872  | 2 | 0 | 2 | 1 |
| Case 96 | 9  | 32,990,132  | 33,804,813  | 3 | 0 | 3 | 1 |
| Case 96 | 9  | 33,810,791  | 34,253,488  | 2 | 0 | 2 | 1 |
| Case 96 | 9  | 34,254,425  | 34,257,923  | 3 | 0 | 3 | 1 |
| Case 96 | 9  | 34,257,979  | 34,365,357  | 2 | 0 | 2 | 1 |
| Case 96 | 9  | 34,371,171  | 35,107,858  | 3 | 0 | 3 | 1 |
| Case 96 | 9  | 35,108,064  | 35,295,703  | 2 | 0 | 2 | 1 |
| Case 96 | 9  | 35,295,780  | 35,908,488  | 3 | 0 | 3 | 1 |
| Case 96 | 9  | 35,910,945  | 36,002,881  | 2 | 0 | 2 | 1 |
| Case 96 | 9  | 36,005,428  | 36,101,562  | 3 | 0 | 3 | 1 |
| Case 96 | 9  | 36,102,096  | 36,731,326  | 2 | 0 | 2 | 1 |
| Case 96 | 9  | 36,732,969  | 36,901,044  | 3 | 0 | 3 | 1 |
| Case 96 | 9  | 36,901,161  | 37,289,932  | 2 | 0 | 2 | 1 |
| Case 96 | 9  | 37,302,155  | 37,384,977  | 3 | 0 | 3 | 1 |
| Case 96 | 9  | 37,387,177  | 37,692,711  | 2 | 0 | 2 | 1 |
| Case 96 | 9  | 37,692,733  | 38,141,369  | 3 | 0 | 3 | 1 |
| Case 96 | 9  | 38,144,829  | 38,386,351  | 2 | 0 | 2 | 1 |
| Case 96 | 9  | 38,390,937  | 38,528,689  | 3 | 0 | 3 | 1 |
| Case 96 | 9  | 38,531,889  | 39,179,289  | 2 | 0 | 2 | 1 |
| Case 96 | 9  | 40,714,011  | 46,944,322  | 3 | 0 | 3 | 1 |
| Case 96 | 9  | 65,629,772  | 76,105,546  | 3 | 0 | 3 | 1 |
| Case 96 | 9  | 76,107,080  | 78,412,423  | 3 | 1 | 4 | 0 |
| Case 96 | 9  | 78,416,165  | 83,599,708  | 3 | 0 | 3 | 1 |
| Case 96 | 9  | 83,603,221  | 85,417,267  | 3 | 1 | 4 | 0 |
| Case 96 | 9  | 85,421,474  | 99,525,487  | 3 | 0 | 3 | 1 |
| Case 96 | 9  | 99,525,494  | 131,762,080 | 3 | 1 | 4 | 0 |
| Case 96 | 9  | 131,763,850 | 131,870,319 | 3 | 0 | 3 | 1 |
| Case 96 | 9  | 131,871,927 | 133,920,919 | 3 | 1 | 4 | 0 |
| Case 96 | 9  | 133,920,939 | 133,957,467 | 3 | 0 | 3 | 1 |
| Case 96 | 9  | 133,957,759 | 140,063,557 | 3 | 1 | 4 | 0 |
| Case 96 | 9  | 140,063,984 | 140,330,259 | 2 | 1 | 3 | 0 |
| Case 96 | 9  | 140,330,497 | 141,066,491 | 3 | 1 | 4 | 0 |
| Case 96 | 10 | 98,087      | 7,423,829   | 3 | 2 | 5 | 0 |
| Case 96 | 10 | 7,425,691   | 7,702,595   | 2 | 2 | 4 | 0 |
| Case 96 | 10 | 7,707,276   | 8,168,485   | 3 | 2 | 5 | 0 |
| Case 96 | 10 | 8,171,357   | 8,500,122   | 2 | 2 | 4 | 0 |
| Case 96 | 10 | 8,501,583   | 11,713,277  | 3 | 2 | 5 | 0 |
| Case 96 | 10 | 11,713,869  | 12,464,305  | 2 | 2 | 4 | 0 |
| Case 96 | 10 | 12,467,228  | 18,392,980  | 3 | 2 | 5 | 0 |
| Case 96 | 10 | 18,396,166  | 18,828,371  | 2 | 2 | 4 | 0 |
| Case 96 | 10 | 18,828,372  | 19,534,443  | 3 | 2 | 5 | 0 |
| Case 96 | 10 | 19,535,187  | 19,907,943  | 2 | 2 | 4 | 0 |
| Case 96 | 10 | 19,909,770  | 27,389,164  | 3 | 2 | 5 | 0 |
| Case 96 | 10 | 27,389,197  | 27,516,588  | 2 | 2 | 4 | 0 |
| Case 96 | 10 | 27,519,221  | 28,460,483  | 3 | 2 | 5 | 0 |
| Case 96 | 10 | 28,462,019  | 28,970,433  | 2 | 2 | 4 | 0 |
| Case 96 | 10 | 28,970,473  | 30,366,521  | 3 | 2 | 5 | 0 |
| Case 96 | 10 | 30,367,323  | 30,582,897  | 2 | 2 | 4 | 0 |
| Case 96 | 10 | 30,584,372  | 34,806,744  | 3 | 2 | 5 | 0 |
| Case 96 | 10 | 34,813,742  | 35,896,892  | 2 | 2 | 4 | 0 |
| Case 96 | 10 | 35,897,304  | 37,790,656  | 3 | 2 | 5 | 0 |
| Case 96 | 10 | 37,802,532  | 38,973,500  | 2 | 2 | 4 | 0 |
| Case 96 | 10 | 38,995,349  | 39,097,912  | 3 | 2 | 5 | 0 |
| Case 96 | 10 | 42,436,301  | 43,571,447  | 3 | 2 | 5 | 0 |
| Case 96 | 10 | 43,573,558  | 44,111,901  | 2 | 2 | 4 | 0 |
| Case 96 | 10 | 44,112,119  | 46,518,615  | 3 | 2 | 5 | 0 |

|         |    |             |             |   |   |   |   |
|---------|----|-------------|-------------|---|---|---|---|
| Case 96 | 10 | 46,527,516  | 48,473,929  | 2 | 2 | 4 | 0 |
| Case 96 | 10 | 48,480,228  | 50,724,555  | 3 | 2 | 5 | 0 |
| Case 96 | 10 | 50,724,678  | 52,002,204  | 2 | 2 | 4 | 0 |
| Case 96 | 10 | 52,002,800  | 62,869,980  | 3 | 2 | 5 | 0 |
| Case 96 | 10 | 62,896,874  | 66,154,377  | 5 | 2 | 7 | 0 |
| Case 96 | 10 | 66,163,616  | 66,259,625  | 3 | 2 | 5 | 0 |
| Case 96 | 10 | 66,260,362  | 66,992,498  | 6 | 1 | 7 | 0 |
| Case 96 | 10 | 66,996,579  | 67,306,869  | 7 | 0 | 7 | 1 |
| Case 96 | 10 | 67,318,448  | 69,005,693  | 5 | 2 | 7 | 0 |
| Case 96 | 10 | 69,005,799  | 69,011,499  | 3 | 2 | 5 | 0 |
| Case 96 | 10 | 69,013,466  | 69,900,240  | 4 | 2 | 6 | 0 |
| Case 96 | 10 | 69,902,549  | 71,254,765  | 3 | 2 | 5 | 0 |
| Case 96 | 10 | 71,255,663  | 71,476,425  | 3 | 3 | 6 | 0 |
| Case 96 | 10 | 71,477,144  | 73,126,727  | 3 | 2 | 5 | 0 |
| Case 96 | 10 | 73,129,458  | 75,549,984  | 6 | 1 | 7 | 0 |
| Case 96 | 10 | 75,551,697  | 81,145,266  | 7 | 0 | 7 | 1 |
| Case 96 | 10 | 81,145,535  | 87,358,975  | 3 | 0 | 3 | 1 |
| Case 96 | 10 | 87,359,826  | 87,824,238  | 4 | 0 | 4 | 1 |
| Case 96 | 10 | 87,825,498  | 99,519,057  | 3 | 0 | 3 | 1 |
| Case 96 | 10 | 99,519,097  | 100,017,453 | 4 | 0 | 4 | 1 |
| Case 96 | 10 | 100,017,500 | 105,785,913 | 3 | 0 | 3 | 1 |
| Case 96 | 10 | 105,786,298 | 105,832,350 | 4 | 0 | 4 | 1 |
| Case 96 | 10 | 105,832,966 | 106,377,705 | 3 | 0 | 3 | 1 |
| Case 96 | 10 | 106,384,631 | 107,022,247 | 4 | 0 | 4 | 1 |
| Case 96 | 10 | 107,023,390 | 112,072,649 | 3 | 0 | 3 | 1 |
| Case 96 | 10 | 112,079,743 | 112,242,851 | 4 | 0 | 4 | 1 |
| Case 96 | 10 | 112,246,352 | 114,942,278 | 3 | 0 | 3 | 1 |
| Case 96 | 10 | 114,958,159 | 115,350,594 | 4 | 0 | 4 | 1 |
| Case 96 | 10 | 115,350,596 | 122,966,573 | 3 | 0 | 3 | 1 |
| Case 96 | 10 | 122,970,549 | 123,415,590 | 4 | 0 | 4 | 1 |
| Case 96 | 10 | 123,417,635 | 123,880,823 | 3 | 0 | 3 | 1 |
| Case 96 | 10 | 123,882,245 | 123,970,565 | 4 | 0 | 4 | 1 |
| Case 96 | 10 | 123,970,569 | 124,089,120 | 3 | 0 | 3 | 1 |
| Case 96 | 10 | 124,090,711 | 124,530,915 | 4 | 0 | 4 | 1 |
| Case 96 | 10 | 124,532,133 | 127,727,888 | 3 | 0 | 3 | 1 |
| Case 96 | 10 | 127,727,905 | 128,193,754 | 4 | 0 | 4 | 1 |
| Case 96 | 10 | 128,197,218 | 128,788,749 | 3 | 0 | 3 | 1 |
| Case 96 | 10 | 128,789,070 | 129,172,393 | 4 | 0 | 4 | 1 |
| Case 96 | 10 | 129,179,426 | 129,851,621 | 3 | 0 | 3 | 1 |
| Case 96 | 10 | 129,854,145 | 129,975,342 | 4 | 0 | 4 | 1 |
| Case 96 | 10 | 129,977,477 | 130,588,415 | 3 | 0 | 3 | 1 |
| Case 96 | 10 | 130,589,876 | 131,009,253 | 4 | 0 | 4 | 1 |
| Case 96 | 10 | 131,013,164 | 132,061,518 | 3 | 0 | 3 | 1 |
| Case 96 | 10 | 132,061,768 | 132,563,074 | 4 | 0 | 4 | 1 |
| Case 96 | 10 | 132,568,315 | 132,980,357 | 3 | 0 | 3 | 1 |
| Case 96 | 10 | 132,980,435 | 133,960,422 | 4 | 0 | 4 | 1 |
| Case 96 | 10 | 133,960,517 | 135,270,577 | 3 | 0 | 3 | 1 |
| Case 96 | 10 | 135,276,845 | 135,477,883 | 4 | 0 | 4 | 1 |
| Case 96 | 11 | 193,146     | 545,087     | 2 | 2 | 4 | 0 |
| Case 96 | 11 | 549,119     | 563,598     | 2 | 1 | 3 | 0 |
| Case 96 | 11 | 565,840     | 9,258,146   | 2 | 2 | 4 | 0 |
| Case 96 | 11 | 9,262,823   | 9,806,849   | 2 | 1 | 3 | 0 |
| Case 96 | 11 | 9,809,181   | 37,700,681  | 2 | 2 | 4 | 0 |
| Case 96 | 11 | 37,706,893  | 38,271,205  | 2 | 1 | 3 | 0 |
| Case 96 | 11 | 38,285,501  | 50,368,121  | 2 | 2 | 4 | 0 |
| Case 96 | 11 | 50,369,683  | 51,591,253  | 2 | 1 | 3 | 0 |
| Case 96 | 11 | 54,794,237  | 54,974,693  | 2 | 1 | 3 | 0 |
| Case 96 | 11 | 55,026,160  | 64,559,402  | 2 | 2 | 4 | 0 |
| Case 96 | 11 | 64,559,429  | 64,620,880  | 2 | 1 | 3 | 0 |
| Case 96 | 11 | 64,621,573  | 64,803,082  | 2 | 2 | 4 | 0 |
| Case 96 | 11 | 64,803,351  | 64,813,994  | 2 | 1 | 3 | 0 |

|         |    |             |             |   |   |   |   |
|---------|----|-------------|-------------|---|---|---|---|
| Case 96 | 11 | 64,815,038  | 68,178,909  | 2 | 2 | 4 | 0 |
| Case 96 | 11 | 68,181,248  | 69,592,814  | 7 | 0 | 7 | 1 |
| Case 96 | 11 | 69,596,523  | 81,719,231  | 2 | 2 | 4 | 0 |
| Case 96 | 11 | 81,726,997  | 82,001,588  | 2 | 1 | 3 | 0 |
| Case 96 | 11 | 82,007,844  | 85,465,395  | 2 | 2 | 4 | 0 |
| Case 96 | 11 | 85,468,708  | 98,454,916  | 2 | 1 | 3 | 0 |
| Case 96 | 11 | 98,456,485  | 98,677,443  | 1 | 1 | 2 | 0 |
| Case 96 | 11 | 98,678,717  | 102,732,913 | 2 | 1 | 3 | 0 |
| Case 96 | 11 | 102,736,419 | 107,554,267 | 2 | 2 | 4 | 0 |
| Case 96 | 11 | 107,566,557 | 107,857,145 | 2 | 1 | 3 | 0 |
| Case 96 | 11 | 107,858,642 | 108,032,167 | 2 | 2 | 4 | 0 |
| Case 96 | 11 | 108,032,233 | 108,380,281 | 2 | 1 | 3 | 0 |
| Case 96 | 11 | 108,380,335 | 111,941,332 | 2 | 2 | 4 | 0 |
| Case 96 | 11 | 111,941,905 | 111,958,686 | 2 | 1 | 3 | 0 |
| Case 96 | 11 | 111,959,699 | 119,045,408 | 2 | 2 | 4 | 0 |
| Case 96 | 11 | 119,045,520 | 119,059,877 | 2 | 1 | 3 | 0 |
| Case 96 | 11 | 119,060,188 | 122,888,805 | 2 | 2 | 4 | 0 |
| Case 96 | 11 | 122,890,439 | 123,012,658 | 2 | 1 | 3 | 0 |
| Case 96 | 11 | 123,013,271 | 126,144,865 | 2 | 2 | 4 | 0 |
| Case 96 | 11 | 126,145,709 | 126,261,832 | 2 | 1 | 3 | 0 |
| Case 96 | 11 | 126,263,885 | 134,934,063 | 2 | 2 | 4 | 0 |
| Case 96 | 12 | 191,619     | 18,848,131  | 2 | 1 | 3 | 0 |
| Case 96 | 12 | 18,849,084  | 20,403,211  | 7 | 0 | 7 | 1 |
| Case 96 | 12 | 20,408,976  | 21,190,595  | 5 | 1 | 6 | 0 |
| Case 96 | 12 | 21,196,331  | 21,379,632  | 6 | 1 | 7 | 0 |
| Case 96 | 12 | 21,382,251  | 22,169,854  | 5 | 1 | 6 | 0 |
| Case 96 | 12 | 22,174,952  | 22,223,709  | 7 | 0 | 7 | 1 |
| Case 96 | 12 | 22,234,133  | 23,896,605  | 5 | 1 | 6 | 0 |
| Case 96 | 12 | 23,896,612  | 24,093,764  | 6 | 1 | 7 | 0 |
| Case 96 | 12 | 24,099,662  | 28,237,294  | 7 | 0 | 7 | 1 |
| Case 96 | 12 | 28,237,731  | 28,901,089  | 4 | 2 | 6 | 0 |
| Case 96 | 12 | 28,906,557  | 28,906,557  | 3 | 3 | 6 | 0 |
| Case 96 | 12 | 28,906,620  | 28,934,271  | 3 | 1 | 4 | 0 |
| Case 96 | 12 | 28,945,335  | 33,512,136  | 4 | 1 | 5 | 0 |
| Case 96 | 12 | 33,517,984  | 33,531,438  | 3 | 1 | 4 | 0 |
| Case 96 | 12 | 33,532,804  | 34,263,134  | 2 | 2 | 4 | 0 |
| Case 96 | 12 | 34,266,694  | 34,853,011  | 2 | 1 | 3 | 0 |
| Case 96 | 12 | 37,876,400  | 38,713,745  | 2 | 1 | 3 | 0 |
| Case 96 | 12 | 38,713,970  | 132,334,460 | 2 | 2 | 4 | 0 |
| Case 96 | 12 | 132,335,572 | 132,419,533 | 2 | 1 | 3 | 0 |
| Case 96 | 12 | 132,422,244 | 133,350,888 | 2 | 2 | 4 | 0 |
| Case 96 | 12 | 133,351,746 | 133,378,499 | 2 | 1 | 3 | 0 |
| Case 96 | 12 | 133,380,349 | 133,810,935 | 2 | 2 | 4 | 0 |
| Case 96 | 13 | 19,058,717  | 21,722,557  | 4 | 0 | 4 | 1 |
| Case 96 | 13 | 21,723,281  | 21,751,342  | 3 | 0 | 3 | 1 |
| Case 96 | 13 | 21,751,360  | 50,737,869  | 4 | 0 | 4 | 1 |
| Case 96 | 13 | 50,745,971  | 50,846,748  | 3 | 0 | 3 | 1 |
| Case 96 | 13 | 50,847,315  | 85,323,372  | 4 | 0 | 4 | 1 |
| Case 96 | 13 | 85,329,405  | 85,616,161  | 3 | 0 | 3 | 1 |
| Case 96 | 13 | 85,616,541  | 115,103,529 | 4 | 0 | 4 | 1 |
| Case 96 | 14 | 19,280,733  | 19,280,733  | 2 | 1 | 3 | 0 |
| Case 96 | 14 | 19,327,823  | 20,763,884  | 1 | 1 | 2 | 0 |
| Case 96 | 14 | 20,763,923  | 22,336,763  | 2 | 1 | 3 | 0 |
| Case 96 | 14 | 22,337,181  | 23,005,786  | 3 | 1 | 4 | 0 |
| Case 96 | 14 | 23,006,908  | 45,370,122  | 2 | 1 | 3 | 0 |
| Case 96 | 14 | 45,372,415  | 45,414,390  | 2 | 2 | 4 | 0 |
| Case 96 | 14 | 45,414,662  | 105,410,471 | 2 | 1 | 3 | 0 |
| Case 96 | 14 | 105,410,803 | 105,420,534 | 3 | 1 | 4 | 0 |
| Case 96 | 14 | 105,420,977 | 107,287,663 | 2 | 1 | 3 | 0 |
| Case 96 | 15 | 20,034,919  | 42,143,486  | 3 | 0 | 3 | 1 |
| Case 96 | 15 | 42,143,533  | 42,155,013  | 2 | 0 | 2 | 1 |

|         |    |            |             |   |   |   |   |
|---------|----|------------|-------------|---|---|---|---|
| Case 96 | 15 | 42,155,023 | 43,891,364  | 3 | 0 | 3 | 1 |
| Case 96 | 15 | 43,892,807 | 43,939,642  | 2 | 0 | 2 | 1 |
| Case 96 | 15 | 43,939,659 | 64,710,827  | 3 | 0 | 3 | 1 |
| Case 96 | 15 | 64,712,608 | 64,933,982  | 2 | 0 | 2 | 1 |
| Case 96 | 15 | 64,962,630 | 102,461,162 | 3 | 0 | 3 | 1 |
| Case 96 | 16 | 88,165     | 192,314     | 4 | 0 | 4 | 1 |
| Case 96 | 16 | 193,586    | 309,998     | 3 | 0 | 3 | 1 |
| Case 96 | 16 | 310,018    | 333,284     | 2 | 0 | 2 | 1 |
| Case 96 | 16 | 333,338    | 613,524     | 3 | 0 | 3 | 1 |
| Case 96 | 16 | 614,727    | 731,845     | 2 | 0 | 2 | 1 |
| Case 96 | 16 | 732,799    | 772,447     | 3 | 0 | 3 | 1 |
| Case 96 | 16 | 772,842    | 780,942     | 2 | 0 | 2 | 1 |
| Case 96 | 16 | 781,623    | 818,446     | 3 | 0 | 3 | 1 |
| Case 96 | 16 | 818,452    | 847,743     | 2 | 0 | 2 | 1 |
| Case 96 | 16 | 847,871    | 1,271,987   | 3 | 0 | 3 | 1 |
| Case 96 | 16 | 1,272,038  | 1,273,638   | 2 | 0 | 2 | 1 |
| Case 96 | 16 | 1,273,803  | 1,381,917   | 3 | 0 | 3 | 1 |
| Case 96 | 16 | 1,383,327  | 1,396,285   | 2 | 0 | 2 | 1 |
| Case 96 | 16 | 1,396,609  | 1,536,938   | 3 | 0 | 3 | 1 |
| Case 96 | 16 | 1,537,391  | 1,537,874   | 2 | 0 | 2 | 1 |
| Case 96 | 16 | 1,537,884  | 1,799,407   | 3 | 0 | 3 | 1 |
| Case 96 | 16 | 1,802,232  | 1,974,795   | 2 | 0 | 2 | 1 |
| Case 96 | 16 | 1,976,374  | 2,000,933   | 3 | 0 | 3 | 1 |
| Case 96 | 16 | 2,002,896  | 2,051,064   | 2 | 0 | 2 | 1 |
| Case 96 | 16 | 2,051,096  | 2,130,190   | 3 | 0 | 3 | 1 |
| Case 96 | 16 | 2,130,198  | 2,147,338   | 2 | 0 | 2 | 1 |
| Case 96 | 16 | 2,152,865  | 2,259,566   | 3 | 0 | 3 | 1 |
| Case 96 | 16 | 2,259,598  | 2,293,318   | 2 | 0 | 2 | 1 |
| Case 96 | 16 | 2,294,440  | 2,506,918   | 3 | 0 | 3 | 1 |
| Case 96 | 16 | 2,510,603  | 2,522,849   | 2 | 0 | 2 | 1 |
| Case 96 | 16 | 2,522,861  | 3,010,466   | 3 | 0 | 3 | 1 |
| Case 96 | 16 | 3,014,990  | 3,056,584   | 2 | 0 | 2 | 1 |
| Case 96 | 16 | 3,061,591  | 3,165,845   | 3 | 0 | 3 | 1 |
| Case 96 | 16 | 3,165,900  | 3,217,436   | 2 | 0 | 2 | 1 |
| Case 96 | 16 | 3,219,600  | 3,599,200   | 3 | 0 | 3 | 1 |
| Case 96 | 16 | 3,602,242  | 3,632,347   | 2 | 0 | 2 | 1 |
| Case 96 | 16 | 3,632,372  | 4,359,421   | 3 | 0 | 3 | 1 |
| Case 96 | 16 | 4,367,730  | 4,460,049   | 2 | 0 | 2 | 1 |
| Case 96 | 16 | 4,462,383  | 4,557,846   | 3 | 0 | 3 | 1 |
| Case 96 | 16 | 4,557,949  | 4,821,698   | 2 | 0 | 2 | 1 |
| Case 96 | 16 | 4,828,087  | 5,020,539   | 3 | 0 | 3 | 1 |
| Case 96 | 16 | 5,021,983  | 5,097,947   | 2 | 0 | 2 | 1 |
| Case 96 | 16 | 5,105,250  | 5,143,537   | 3 | 0 | 3 | 1 |
| Case 96 | 16 | 5,145,230  | 5,331,291   | 2 | 0 | 2 | 1 |
| Case 96 | 16 | 5,331,838  | 6,291,619   | 3 | 0 | 3 | 1 |
| Case 96 | 16 | 6,293,065  | 7,848,287   | 2 | 1 | 3 | 0 |
| Case 96 | 16 | 7,854,984  | 10,173,053  | 2 | 2 | 4 | 0 |
| Case 96 | 16 | 10,175,318 | 10,418,771  | 2 | 1 | 3 | 0 |
| Case 96 | 16 | 10,423,631 | 11,945,350  | 2 | 2 | 4 | 0 |
| Case 96 | 16 | 11,945,363 | 12,522,742  | 2 | 1 | 3 | 0 |
| Case 96 | 16 | 12,525,414 | 12,704,565  | 3 | 1 | 4 | 0 |
| Case 96 | 16 | 12,706,809 | 13,072,270  | 2 | 1 | 3 | 0 |
| Case 96 | 16 | 13,073,334 | 13,764,741  | 2 | 2 | 4 | 0 |
| Case 96 | 16 | 13,764,761 | 14,766,480  | 2 | 1 | 3 | 0 |
| Case 96 | 16 | 14,771,789 | 23,350,669  | 2 | 2 | 4 | 0 |
| Case 96 | 16 | 23,360,101 | 24,429,827  | 2 | 1 | 3 | 0 |
| Case 96 | 16 | 24,433,601 | 24,580,298  | 2 | 0 | 2 | 1 |
| Case 96 | 16 | 24,580,646 | 25,360,547  | 3 | 0 | 3 | 1 |
| Case 96 | 16 | 25,373,624 | 25,591,525  | 3 | 1 | 4 | 0 |
| Case 96 | 16 | 25,596,637 | 26,513,193  | 2 | 1 | 3 | 0 |
| Case 96 | 16 | 26,518,263 | 27,896,413  | 3 | 0 | 3 | 1 |



|         |    |            |            |   |   |   |   |
|---------|----|------------|------------|---|---|---|---|
| Case 96 | 16 | 27,897,120 | 35,285,582 | 2 | 1 | 3 | 0 |
| Case 96 | 16 | 46,450,037 | 47,223,418 | 2 | 1 | 3 | 0 |
| Case 96 | 16 | 47,224,693 | 49,554,880 | 2 | 2 | 4 | 0 |
| Case 96 | 16 | 49,555,447 | 50,142,944 | 2 | 1 | 3 | 0 |
| Case 96 | 16 | 50,160,494 | 50,711,334 | 2 | 2 | 4 | 0 |
| Case 96 | 16 | 50,711,355 | 51,942,294 | 2 | 1 | 3 | 0 |
| Case 96 | 16 | 51,942,663 | 53,514,580 | 2 | 2 | 4 | 0 |
| Case 96 | 16 | 53,524,831 | 54,560,477 | 2 | 1 | 3 | 0 |
| Case 96 | 16 | 54,578,328 | 55,773,120 | 2 | 2 | 4 | 0 |
| Case 96 | 16 | 55,778,145 | 56,000,188 | 3 | 1 | 4 | 0 |
| Case 96 | 16 | 56,005,467 | 56,673,410 | 2 | 2 | 4 | 0 |
| Case 96 | 16 | 56,674,151 | 56,703,504 | 3 | 1 | 4 | 0 |
| Case 96 | 16 | 56,703,807 | 59,020,442 | 2 | 2 | 4 | 0 |
| Case 96 | 16 | 59,022,389 | 60,146,143 | 2 | 1 | 3 | 0 |
| Case 96 | 16 | 60,161,902 | 60,446,264 | 2 | 0 | 2 | 1 |
| Case 96 | 16 | 60,446,315 | 60,844,230 | 3 | 0 | 3 | 1 |
| Case 96 | 16 | 60,844,708 | 61,436,948 | 2 | 0 | 2 | 1 |
| Case 96 | 16 | 61,438,789 | 61,898,058 | 3 | 0 | 3 | 1 |
| Case 96 | 16 | 61,899,142 | 63,982,935 | 2 | 0 | 2 | 1 |
| Case 96 | 16 | 63,987,221 | 64,554,640 | 3 | 0 | 3 | 1 |
| Case 96 | 16 | 64,562,010 | 65,247,923 | 2 | 1 | 3 | 0 |
| Case 96 | 16 | 65,250,613 | 69,008,037 | 2 | 2 | 4 | 0 |
| Case 96 | 16 | 69,026,253 | 69,832,648 | 2 | 1 | 3 | 0 |
| Case 96 | 16 | 69,832,662 | 71,209,538 | 2 | 2 | 4 | 0 |
| Case 96 | 16 | 71,218,789 | 71,488,771 | 2 | 1 | 3 | 0 |
| Case 96 | 16 | 71,490,216 | 71,571,512 | 2 | 2 | 4 | 0 |
| Case 96 | 16 | 71,571,658 | 72,094,118 | 2 | 1 | 3 | 0 |
| Case 96 | 16 | 72,094,308 | 72,389,230 | 2 | 2 | 4 | 0 |
| Case 96 | 16 | 72,407,574 | 73,359,690 | 2 | 1 | 3 | 0 |
| Case 96 | 16 | 73,362,587 | 75,922,170 | 2 | 2 | 4 | 0 |
| Case 96 | 16 | 75,924,274 | 76,461,424 | 2 | 1 | 3 | 0 |
| Case 96 | 16 | 76,461,439 | 76,565,917 | 2 | 2 | 4 | 0 |
| Case 96 | 16 | 76,566,157 | 77,605,034 | 2 | 1 | 3 | 0 |
| Case 96 | 16 | 77,608,310 | 78,789,322 | 2 | 2 | 4 | 0 |
| Case 96 | 16 | 78,790,765 | 81,916,932 | 2 | 1 | 3 | 0 |
| Case 96 | 16 | 81,919,466 | 82,169,385 | 3 | 1 | 4 | 0 |
| Case 96 | 16 | 82,181,608 | 82,646,333 | 2 | 1 | 3 | 0 |
| Case 96 | 16 | 82,646,972 | 82,741,256 | 3 | 1 | 4 | 0 |
| Case 96 | 16 | 82,751,864 | 83,999,565 | 3 | 0 | 3 | 1 |
| Case 96 | 16 | 83,999,817 | 85,847,065 | 2 | 1 | 3 | 0 |
| Case 96 | 16 | 85,847,488 | 86,613,143 | 3 | 1 | 4 | 0 |
| Case 96 | 16 | 86,613,171 | 86,836,515 | 2 | 1 | 3 | 0 |
| Case 96 | 16 | 86,839,333 | 87,383,709 | 3 | 1 | 4 | 0 |
| Case 96 | 16 | 87,386,375 | 90,274,695 | 2 | 2 | 4 | 0 |
| Case 96 | 17 | 11,885     | 22,242,355 | 3 | 0 | 3 | 1 |
| Case 96 | 17 | 25,268,142 | 31,601,378 | 3 | 0 | 3 | 1 |
| Case 96 | 17 | 31,605,630 | 31,931,498 | 4 | 0 | 4 | 1 |
| Case 96 | 17 | 31,931,592 | 32,579,788 | 3 | 0 | 3 | 1 |
| Case 96 | 17 | 32,579,814 | 32,793,597 | 4 | 0 | 4 | 1 |
| Case 96 | 17 | 32,795,684 | 41,369,729 | 3 | 0 | 3 | 1 |
| Case 96 | 17 | 41,371,844 | 58,523,761 | 4 | 0 | 4 | 1 |
| Case 96 | 17 | 58,525,018 | 58,955,084 | 3 | 0 | 3 | 1 |
| Case 96 | 17 | 58,966,538 | 73,494,963 | 4 | 0 | 4 | 1 |
| Case 96 | 17 | 73,495,025 | 73,568,125 | 3 | 0 | 3 | 1 |
| Case 96 | 17 | 73,569,308 | 73,888,262 | 4 | 0 | 4 | 1 |
| Case 96 | 17 | 73,888,407 | 73,888,439 | 0 | 0 | 0 | 0 |
| Case 96 | 17 | 73,888,472 | 81,060,040 | 4 | 0 | 4 | 1 |
| Case 96 | 18 | 87,505     | 15,375,878 | 2 | 1 | 3 | 0 |
| Case 96 | 18 | 18,520,354 | 18,546,896 | 2 | 1 | 3 | 0 |
| Case 96 | 18 | 18,550,415 | 23,983,905 | 3 | 1 | 4 | 0 |
| Case 96 | 18 | 23,985,498 | 24,663,034 | 3 | 2 | 5 | 0 |

|         |    |            |            |   |   |   |   |
|---------|----|------------|------------|---|---|---|---|
| Case 96 | 18 | 24,663,789 | 24,877,721 | 2 | 2 | 4 | 0 |
| Case 96 | 18 | 24,880,578 | 25,382,977 | 3 | 2 | 5 | 0 |
| Case 96 | 18 | 25,387,336 | 25,423,583 | 2 | 2 | 4 | 0 |
| Case 96 | 18 | 25,426,499 | 32,982,350 | 3 | 1 | 4 | 0 |
| Case 96 | 18 | 32,986,600 | 35,135,989 | 1 | 1 | 2 | 0 |
| Case 96 | 18 | 35,143,815 | 35,238,850 | 2 | 1 | 3 | 0 |
| Case 96 | 18 | 35,239,873 | 42,428,724 | 1 | 1 | 2 | 0 |
| Case 96 | 18 | 42,434,615 | 42,970,447 | 2 | 1 | 3 | 0 |
| Case 96 | 18 | 42,970,483 | 43,223,105 | 1 | 1 | 2 | 0 |
| Case 96 | 18 | 43,224,101 | 43,329,310 | 2 | 1 | 3 | 0 |
| Case 96 | 18 | 43,329,719 | 44,026,234 | 1 | 1 | 2 | 0 |
| Case 96 | 18 | 44,027,628 | 44,278,985 | 2 | 1 | 3 | 0 |
| Case 96 | 18 | 44,279,892 | 44,541,614 | 1 | 1 | 2 | 0 |
| Case 96 | 18 | 44,541,915 | 44,635,148 | 2 | 1 | 3 | 0 |
| Case 96 | 18 | 44,639,365 | 45,866,936 | 1 | 1 | 2 | 0 |
| Case 96 | 18 | 45,872,486 | 46,482,070 | 2 | 1 | 3 | 0 |
| Case 96 | 18 | 46,490,181 | 47,362,880 | 1 | 1 | 2 | 0 |
| Case 96 | 18 | 47,363,125 | 47,635,466 | 2 | 1 | 3 | 0 |
| Case 96 | 18 | 47,638,056 | 47,795,073 | 1 | 1 | 2 | 0 |
| Case 96 | 18 | 47,795,629 | 47,814,446 | 2 | 1 | 3 | 0 |
| Case 96 | 18 | 47,818,688 | 54,693,531 | 1 | 1 | 2 | 0 |
| Case 96 | 18 | 54,694,151 | 54,822,533 | 2 | 1 | 3 | 0 |
| Case 96 | 18 | 54,843,012 | 55,839,162 | 1 | 1 | 2 | 0 |
| Case 96 | 18 | 55,841,914 | 56,306,138 | 2 | 1 | 3 | 0 |
| Case 96 | 18 | 56,318,033 | 61,212,092 | 1 | 1 | 2 | 0 |
| Case 96 | 18 | 61,223,519 | 61,262,367 | 2 | 1 | 3 | 0 |
| Case 96 | 18 | 61,264,298 | 71,805,503 | 1 | 1 | 2 | 0 |
| Case 96 | 18 | 71,808,441 | 71,896,469 | 2 | 1 | 3 | 0 |
| Case 96 | 18 | 71,900,332 | 72,102,013 | 1 | 1 | 2 | 0 |
| Case 96 | 18 | 72,102,997 | 72,186,306 | 2 | 1 | 3 | 0 |
| Case 96 | 18 | 72,186,404 | 72,983,960 | 1 | 1 | 2 | 0 |
| Case 96 | 18 | 72,984,180 | 73,179,487 | 2 | 1 | 3 | 0 |
| Case 96 | 18 | 73,181,924 | 74,029,649 | 1 | 1 | 2 | 0 |
| Case 96 | 18 | 74,033,720 | 74,138,236 | 2 | 1 | 3 | 0 |
| Case 96 | 18 | 74,144,939 | 74,690,979 | 1 | 1 | 2 | 0 |
| Case 96 | 18 | 74,691,112 | 74,928,907 | 2 | 1 | 3 | 0 |
| Case 96 | 18 | 74,929,214 | 75,650,622 | 1 | 1 | 2 | 0 |
| Case 96 | 18 | 75,650,801 | 75,929,908 | 2 | 1 | 3 | 0 |
| Case 96 | 18 | 75,930,831 | 76,150,938 | 1 | 1 | 2 | 0 |
| Case 96 | 18 | 76,153,361 | 76,868,631 | 2 | 1 | 3 | 0 |
| Case 96 | 18 | 76,870,384 | 78,015,180 | 3 | 1 | 4 | 0 |
| Case 96 | 19 | 260,912    | 11,227,559 | 3 | 0 | 3 | 1 |
| Case 96 | 19 | 11,227,602 | 24,487,350 | 4 | 0 | 4 | 1 |
| Case 96 | 19 | 24,490,299 | 24,629,285 | 3 | 0 | 3 | 1 |
| Case 96 | 19 | 27,732,159 | 59,097,160 | 3 | 0 | 3 | 1 |
| Case 96 | 20 | 63,244     | 7,250,002  | 3 | 2 | 5 | 0 |
| Case 96 | 20 | 7,252,261  | 9,748,829  | 3 | 3 | 6 | 0 |
| Case 96 | 20 | 9,749,518  | 26,293,985 | 3 | 2 | 5 | 0 |
| Case 96 | 20 | 29,425,357 | 40,348,273 | 3 | 2 | 5 | 0 |
| Case 96 | 20 | 40,353,798 | 41,241,888 | 3 | 3 | 6 | 0 |
| Case 96 | 20 | 41,254,183 | 44,761,896 | 3 | 2 | 5 | 0 |
| Case 96 | 20 | 44,765,458 | 45,150,235 | 3 | 3 | 6 | 0 |
| Case 96 | 20 | 45,152,468 | 45,434,399 | 3 | 2 | 5 | 0 |
| Case 96 | 20 | 45,449,779 | 45,734,412 | 3 | 3 | 6 | 0 |
| Case 96 | 20 | 45,734,587 | 45,734,587 | 3 | 1 | 4 | 0 |
| Case 96 | 20 | 45,736,467 | 46,577,654 | 3 | 2 | 5 | 0 |
| Case 96 | 20 | 46,578,103 | 47,031,920 | 3 | 3 | 6 | 0 |
| Case 96 | 20 | 47,033,706 | 50,817,761 | 3 | 2 | 5 | 0 |
| Case 96 | 20 | 50,823,305 | 51,558,452 | 3 | 3 | 6 | 0 |
| Case 96 | 20 | 51,558,691 | 53,256,245 | 3 | 2 | 5 | 0 |
| Case 96 | 20 | 53,257,755 | 54,757,601 | 3 | 3 | 6 | 0 |

|         |    |             |             |   |   |   |   |
|---------|----|-------------|-------------|---|---|---|---|
| Case 96 | 20 | 54,760,515  | 58,436,963  | 3 | 2 | 5 | 0 |
| Case 96 | 20 | 58,440,630  | 58,496,438  | 5 | 2 | 7 | 0 |
| Case 96 | 20 | 58,496,439  | 59,307,221  | 3 | 2 | 5 | 0 |
| Case 96 | 20 | 59,309,596  | 59,862,019  | 3 | 3 | 6 | 0 |
| Case 96 | 20 | 59,862,269  | 59,863,111  | 3 | 1 | 4 | 0 |
| Case 96 | 20 | 59,863,972  | 62,948,788  | 3 | 2 | 5 | 0 |
| Case 96 | 21 | 10,827,533  | 10,971,337  | 2 | 1 | 3 | 0 |
| Case 96 | 21 | 14,368,320  | 14,613,203  | 2 | 1 | 3 | 0 |
| Case 96 | 21 | 14,669,931  | 16,495,307  | 2 | 2 | 4 | 0 |
| Case 96 | 21 | 16,510,753  | 20,020,025  | 2 | 1 | 3 | 0 |
| Case 96 | 21 | 20,028,118  | 25,335,327  | 2 | 0 | 2 | 1 |
| Case 96 | 21 | 25,351,030  | 26,038,972  | 2 | 1 | 3 | 0 |
| Case 96 | 21 | 26,040,742  | 30,173,301  | 2 | 0 | 2 | 1 |
| Case 96 | 21 | 30,189,876  | 33,060,747  | 2 | 1 | 3 | 0 |
| Case 96 | 21 | 33,065,598  | 33,124,238  | 2 | 0 | 2 | 1 |
| Case 96 | 21 | 33,136,524  | 33,505,090  | 3 | 0 | 3 | 1 |
| Case 96 | 21 | 33,507,584  | 35,545,060  | 2 | 1 | 3 | 0 |
| Case 96 | 21 | 35,546,799  | 35,582,703  | 2 | 0 | 2 | 1 |
| Case 96 | 21 | 35,583,910  | 37,420,650  | 3 | 0 | 3 | 1 |
| Case 96 | 21 | 37,423,599  | 38,032,750  | 2 | 0 | 2 | 1 |
| Case 96 | 21 | 38,034,172  | 38,433,519  | 3 | 0 | 3 | 1 |
| Case 96 | 21 | 38,436,825  | 38,732,228  | 2 | 0 | 2 | 1 |
| Case 96 | 21 | 38,740,824  | 40,152,372  | 3 | 0 | 3 | 1 |
| Case 96 | 21 | 40,157,281  | 40,265,938  | 2 | 0 | 2 | 1 |
| Case 96 | 21 | 40,271,392  | 40,547,329  | 3 | 0 | 3 | 1 |
| Case 96 | 21 | 40,547,555  | 40,981,218  | 2 | 0 | 2 | 1 |
| Case 96 | 21 | 40,981,260  | 41,473,566  | 3 | 0 | 3 | 1 |
| Case 96 | 21 | 41,477,207  | 41,801,051  | 2 | 0 | 2 | 1 |
| Case 96 | 21 | 41,801,762  | 43,715,013  | 3 | 0 | 3 | 1 |
| Case 96 | 21 | 43,715,801  | 43,775,884  | 2 | 0 | 2 | 1 |
| Case 96 | 21 | 43,776,682  | 44,270,175  | 3 | 0 | 3 | 1 |
| Case 96 | 21 | 44,270,215  | 44,437,142  | 2 | 0 | 2 | 1 |
| Case 96 | 21 | 44,438,248  | 44,720,146  | 3 | 0 | 3 | 1 |
| Case 96 | 21 | 44,720,807  | 44,755,474  | 2 | 0 | 2 | 1 |
| Case 96 | 21 | 44,761,874  | 44,793,806  | 3 | 0 | 3 | 1 |
| Case 96 | 21 | 44,795,084  | 44,949,285  | 2 | 0 | 2 | 1 |
| Case 96 | 21 | 44,949,684  | 45,679,399  | 3 | 0 | 3 | 1 |
| Case 96 | 21 | 45,679,565  | 45,768,350  | 2 | 0 | 2 | 1 |
| Case 96 | 21 | 45,768,598  | 46,309,895  | 3 | 0 | 3 | 1 |
| Case 96 | 21 | 46,311,264  | 46,321,818  | 2 | 0 | 2 | 1 |
| Case 96 | 21 | 46,322,487  | 46,441,947  | 3 | 0 | 3 | 1 |
| Case 96 | 21 | 46,451,705  | 47,777,106  | 7 | 0 | 7 | 1 |
| Case 96 | 21 | 47,783,487  | 47,809,254  | 3 | 0 | 3 | 1 |
| Case 96 | 21 | 47,810,597  | 47,954,252  | 2 | 0 | 2 | 1 |
| Case 96 | 21 | 47,954,567  | 48,100,155  | 3 | 0 | 3 | 1 |
| Case 96 | 22 | 16,114,244  | 22,307,519  | 2 | 1 | 3 | 0 |
| Case 96 | 22 | 22,312,879  | 22,573,637  | 1 | 0 | 1 | 0 |
| Case 96 | 22 | 22,584,809  | 33,402,843  | 2 | 1 | 3 | 0 |
| Case 96 | 22 | 33,408,519  | 51,052,379  | 2 | 2 | 4 | 0 |
| Case 96 | 22 | 51,054,264  | 51,195,728  | 3 | 0 | 3 | 1 |
| Case 97 | 1  | 82,154      | 121,346,616 | 2 | 1 | 3 | 0 |
| Case 97 | 1  | 142,649,718 | 143,418,972 | 2 | 1 | 3 | 0 |
| Case 97 | 1  | 143,720,409 | 158,803,873 | 2 | 2 | 4 | 0 |
| Case 97 | 1  | 158,809,189 | 159,505,101 | 3 | 2 | 5 | 0 |
| Case 97 | 1  | 159,505,202 | 159,682,528 | 4 | 2 | 6 | 0 |
| Case 97 | 1  | 159,683,091 | 162,827,816 | 3 | 2 | 5 | 0 |
| Case 97 | 1  | 162,828,060 | 164,504,803 | 4 | 2 | 6 | 0 |
| Case 97 | 1  | 164,506,189 | 165,137,813 | 3 | 2 | 5 | 0 |
| Case 97 | 1  | 165,138,246 | 165,440,119 | 4 | 2 | 6 | 0 |
| Case 97 | 1  | 165,440,194 | 166,035,856 | 3 | 2 | 5 | 0 |
| Case 97 | 1  | 166,036,621 | 166,892,001 | 4 | 2 | 6 | 0 |

|         |   |             |             |   |   |   |   |
|---------|---|-------------|-------------|---|---|---|---|
| Case 97 | 1 | 166,895,500 | 168,361,867 | 3 | 2 | 5 | 0 |
| Case 97 | 1 | 168,367,808 | 169,565,021 | 4 | 2 | 6 | 0 |
| Case 97 | 1 | 169,565,246 | 169,670,822 | 3 | 2 | 5 | 0 |
| Case 97 | 1 | 169,671,088 | 169,818,763 | 4 | 2 | 6 | 0 |
| Case 97 | 1 | 169,818,880 | 169,886,210 | 3 | 2 | 5 | 0 |
| Case 97 | 1 | 169,886,587 | 170,927,615 | 4 | 2 | 6 | 0 |
| Case 97 | 1 | 170,928,652 | 171,117,113 | 3 | 2 | 5 | 0 |
| Case 97 | 1 | 171,118,026 | 171,166,532 | 4 | 2 | 6 | 0 |
| Case 97 | 1 | 171,168,497 | 171,417,995 | 3 | 2 | 5 | 0 |
| Case 97 | 1 | 171,426,448 | 171,500,154 | 4 | 2 | 6 | 0 |
| Case 97 | 1 | 171,501,752 | 171,839,720 | 3 | 2 | 5 | 0 |
| Case 97 | 1 | 171,842,607 | 173,690,603 | 4 | 2 | 6 | 0 |
| Case 97 | 1 | 173,702,857 | 174,126,742 | 3 | 2 | 5 | 0 |
| Case 97 | 1 | 174,128,140 | 174,668,661 | 4 | 2 | 6 | 0 |
| Case 97 | 1 | 174,681,384 | 174,794,144 | 3 | 2 | 5 | 0 |
| Case 97 | 1 | 174,797,867 | 174,800,121 | 2 | 0 | 2 | 1 |
| Case 97 | 1 | 174,802,731 | 177,317,366 | 3 | 2 | 5 | 0 |
| Case 97 | 1 | 177,320,470 | 177,712,375 | 4 | 2 | 6 | 0 |
| Case 97 | 1 | 177,714,468 | 179,574,943 | 3 | 2 | 5 | 0 |
| Case 97 | 1 | 179,583,165 | 179,959,724 | 4 | 2 | 6 | 0 |
| Case 97 | 1 | 179,959,750 | 183,923,972 | 3 | 2 | 5 | 0 |
| Case 97 | 1 | 183,925,087 | 184,760,433 | 4 | 2 | 6 | 0 |
| Case 97 | 1 | 184,761,365 | 184,792,315 | 3 | 2 | 5 | 0 |
| Case 97 | 1 | 184,792,432 | 186,082,008 | 4 | 2 | 6 | 0 |
| Case 97 | 1 | 186,083,113 | 186,281,400 | 3 | 2 | 5 | 0 |
| Case 97 | 1 | 186,281,429 | 194,530,914 | 4 | 2 | 6 | 0 |
| Case 97 | 1 | 194,537,085 | 195,685,800 | 3 | 2 | 5 | 0 |
| Case 97 | 1 | 195,686,601 | 196,771,125 | 2 | 2 | 4 | 0 |
| Case 97 | 1 | 196,801,025 | 196,801,025 | 3 | 2 | 5 | 0 |
| Case 97 | 1 | 196,823,300 | 196,901,753 | 4 | 2 | 6 | 0 |
| Case 97 | 1 | 196,918,605 | 218,989,270 | 2 | 2 | 4 | 0 |
| Case 97 | 1 | 218,992,800 | 228,433,171 | 3 | 2 | 5 | 0 |
| Case 97 | 1 | 228,433,353 | 228,467,130 | 3 | 1 | 4 | 0 |
| Case 97 | 1 | 228,467,543 | 228,494,856 | 3 | 2 | 5 | 0 |
| Case 97 | 1 | 228,495,112 | 228,560,747 | 3 | 1 | 4 | 0 |
| Case 97 | 1 | 228,562,292 | 249,218,992 | 3 | 2 | 5 | 0 |
| Case 97 | 2 | 18,674      | 19,298,727  | 3 | 1 | 4 | 0 |
| Case 97 | 2 | 19,299,476  | 19,376,903  | 4 | 1 | 5 | 0 |
| Case 97 | 2 | 19,378,518  | 47,136,186  | 3 | 1 | 4 | 0 |
| Case 97 | 2 | 47,145,029  | 47,486,300  | 4 | 0 | 4 | 1 |
| Case 97 | 2 | 47,489,587  | 47,590,034  | 3 | 0 | 3 | 1 |
| Case 97 | 2 | 47,593,094  | 47,635,667  | 3 | 2 | 5 | 0 |
| Case 97 | 2 | 47,637,301  | 51,612,454  | 4 | 2 | 6 | 0 |
| Case 97 | 2 | 51,618,513  | 51,626,179  | 3 | 2 | 5 | 0 |
| Case 97 | 2 | 51,629,091  | 52,198,271  | 3 | 1 | 4 | 0 |
| Case 97 | 2 | 52,200,302  | 52,430,934  | 3 | 2 | 5 | 0 |
| Case 97 | 2 | 52,433,862  | 52,706,489  | 3 | 1 | 4 | 0 |
| Case 97 | 2 | 52,707,774  | 53,838,838  | 3 | 2 | 5 | 0 |
| Case 97 | 2 | 53,845,919  | 54,483,288  | 3 | 1 | 4 | 0 |
| Case 97 | 2 | 54,490,026  | 54,693,490  | 3 | 2 | 5 | 0 |
| Case 97 | 2 | 54,703,979  | 54,904,592  | 3 | 1 | 4 | 0 |
| Case 97 | 2 | 54,905,778  | 55,251,374  | 3 | 2 | 5 | 0 |
| Case 97 | 2 | 55,252,294  | 56,354,019  | 3 | 1 | 4 | 0 |
| Case 97 | 2 | 56,354,692  | 58,915,608  | 3 | 2 | 5 | 0 |
| Case 97 | 2 | 58,922,570  | 59,290,759  | 3 | 1 | 4 | 0 |
| Case 97 | 2 | 59,290,803  | 60,573,870  | 3 | 2 | 5 | 0 |
| Case 97 | 2 | 60,575,895  | 62,728,403  | 3 | 1 | 4 | 0 |
| Case 97 | 2 | 62,729,621  | 64,698,397  | 3 | 2 | 5 | 0 |
| Case 97 | 2 | 64,699,137  | 65,758,355  | 3 | 1 | 4 | 0 |
| Case 97 | 2 | 65,759,671  | 68,187,992  | 3 | 2 | 5 | 0 |
| Case 97 | 2 | 68,188,887  | 69,135,362  | 3 | 1 | 4 | 0 |

|         |   |             |             |   |   |   |   |
|---------|---|-------------|-------------|---|---|---|---|
| Case 97 | 2 | 69,139,026  | 69,715,845  | 3 | 2 | 5 | 0 |
| Case 97 | 2 | 69,723,170  | 72,010,747  | 3 | 1 | 4 | 0 |
| Case 97 | 2 | 72,011,314  | 72,722,565  | 3 | 2 | 5 | 0 |
| Case 97 | 2 | 72,722,593  | 75,287,819  | 3 | 1 | 4 | 0 |
| Case 97 | 2 | 75,290,700  | 76,649,038  | 3 | 2 | 5 | 0 |
| Case 97 | 2 | 76,654,561  | 76,870,739  | 3 | 1 | 4 | 0 |
| Case 97 | 2 | 76,874,141  | 77,947,988  | 3 | 2 | 5 | 0 |
| Case 97 | 2 | 77,950,794  | 82,900,043  | 3 | 1 | 4 | 0 |
| Case 97 | 2 | 82,905,879  | 83,041,653  | 4 | 1 | 5 | 0 |
| Case 97 | 2 | 83,047,423  | 84,090,746  | 3 | 1 | 4 | 0 |
| Case 97 | 2 | 84,093,827  | 84,924,783  | 3 | 2 | 5 | 0 |
| Case 97 | 2 | 84,924,823  | 88,390,232  | 3 | 1 | 4 | 0 |
| Case 97 | 2 | 88,391,743  | 88,464,840  | 3 | 2 | 5 | 0 |
| Case 97 | 2 | 88,464,926  | 92,081,640  | 3 | 1 | 4 | 0 |
| Case 97 | 2 | 95,429,424  | 95,444,917  | 3 | 1 | 4 | 0 |
| Case 97 | 2 | 95,455,258  | 100,956,776 | 3 | 2 | 5 | 0 |
| Case 97 | 2 | 100,956,949 | 101,236,680 | 3 | 1 | 4 | 0 |
| Case 97 | 2 | 101,241,404 | 101,599,767 | 3 | 2 | 5 | 0 |
| Case 97 | 2 | 101,602,100 | 102,492,869 | 3 | 1 | 4 | 0 |
| Case 97 | 2 | 102,493,546 | 105,012,855 | 3 | 2 | 5 | 0 |
| Case 97 | 2 | 105,019,418 | 106,157,527 | 3 | 1 | 4 | 0 |
| Case 97 | 2 | 106,159,626 | 106,477,781 | 3 | 2 | 5 | 0 |
| Case 97 | 2 | 106,479,284 | 141,751,676 | 3 | 1 | 4 | 0 |
| Case 97 | 2 | 141,752,588 | 141,867,448 | 3 | 2 | 5 | 0 |
| Case 97 | 2 | 141,871,495 | 205,620,551 | 3 | 1 | 4 | 0 |
| Case 97 | 2 | 205,623,306 | 205,623,306 | 3 | 0 | 3 | 1 |
| Case 97 | 2 | 205,623,839 | 205,674,952 | 1 | 0 | 1 | 0 |
| Case 97 | 2 | 205,685,674 | 205,703,928 | 4 | 0 | 4 | 1 |
| Case 97 | 2 | 205,710,514 | 243,048,760 | 3 | 1 | 4 | 0 |
| Case 97 | 3 | 61,495      | 185,281     | 4 | 0 | 4 | 1 |
| Case 97 | 3 | 191,047     | 4,751,252   | 3 | 0 | 3 | 1 |
| Case 97 | 3 | 4,751,802   | 4,868,927   | 4 | 0 | 4 | 1 |
| Case 97 | 3 | 4,869,590   | 5,380,959   | 3 | 0 | 3 | 1 |
| Case 97 | 3 | 5,388,363   | 5,563,371   | 4 | 0 | 4 | 1 |
| Case 97 | 3 | 5,564,422   | 8,403,739   | 3 | 0 | 3 | 1 |
| Case 97 | 3 | 8,404,733   | 8,602,939   | 4 | 0 | 4 | 1 |
| Case 97 | 3 | 8,603,243   | 10,413,526  | 3 | 0 | 3 | 1 |
| Case 97 | 3 | 10,413,601  | 10,797,131  | 4 | 0 | 4 | 1 |
| Case 97 | 3 | 10,801,121  | 16,052,206  | 3 | 0 | 3 | 1 |
| Case 97 | 3 | 16,068,354  | 16,197,294  | 4 | 0 | 4 | 1 |
| Case 97 | 3 | 16,199,034  | 18,031,227  | 3 | 0 | 3 | 1 |
| Case 97 | 3 | 18,038,961  | 19,441,126  | 4 | 0 | 4 | 1 |
| Case 97 | 3 | 19,442,606  | 24,082,776  | 3 | 0 | 3 | 1 |
| Case 97 | 3 | 24,083,324  | 25,632,894  | 4 | 0 | 4 | 1 |
| Case 97 | 3 | 25,633,685  | 26,425,249  | 3 | 0 | 3 | 1 |
| Case 97 | 3 | 26,432,346  | 27,281,769  | 4 | 0 | 4 | 1 |
| Case 97 | 3 | 27,284,997  | 27,702,442  | 3 | 0 | 3 | 1 |
| Case 97 | 3 | 27,706,298  | 29,499,390  | 4 | 0 | 4 | 1 |
| Case 97 | 3 | 29,500,834  | 29,703,209  | 3 | 0 | 3 | 1 |
| Case 97 | 3 | 29,703,236  | 31,789,582  | 4 | 0 | 4 | 1 |
| Case 97 | 3 | 31,791,851  | 31,852,083  | 3 | 0 | 3 | 1 |
| Case 97 | 3 | 31,856,030  | 31,919,601  | 4 | 0 | 4 | 1 |
| Case 97 | 3 | 31,922,752  | 33,948,370  | 3 | 0 | 3 | 1 |
| Case 97 | 3 | 33,956,494  | 34,905,662  | 4 | 0 | 4 | 1 |
| Case 97 | 3 | 34,908,824  | 35,651,949  | 3 | 0 | 3 | 1 |
| Case 97 | 3 | 35,661,187  | 35,826,707  | 4 | 0 | 4 | 1 |
| Case 97 | 3 | 35,832,877  | 36,095,941  | 3 | 0 | 3 | 1 |
| Case 97 | 3 | 36,097,738  | 36,873,494  | 4 | 0 | 4 | 1 |
| Case 97 | 3 | 36,873,657  | 37,458,926  | 3 | 0 | 3 | 1 |
| Case 97 | 3 | 37,458,998  | 37,777,368  | 4 | 0 | 4 | 1 |
| Case 97 | 3 | 37,778,407  | 38,304,367  | 3 | 0 | 3 | 1 |

|         |   |             |             |   |   |   |   |
|---------|---|-------------|-------------|---|---|---|---|
| Case 97 | 3 | 38,307,398  | 38,616,877  | 4 | 0 | 4 | 1 |
| Case 97 | 3 | 38,619,312  | 38,645,249  | 3 | 0 | 3 | 1 |
| Case 97 | 3 | 38,645,420  | 38,966,906  | 4 | 0 | 4 | 1 |
| Case 97 | 3 | 38,968,310  | 39,133,129  | 3 | 0 | 3 | 1 |
| Case 97 | 3 | 39,135,551  | 39,178,437  | 4 | 0 | 4 | 1 |
| Case 97 | 3 | 39,178,453  | 39,225,635  | 3 | 0 | 3 | 1 |
| Case 97 | 3 | 39,225,752  | 40,236,723  | 4 | 0 | 4 | 1 |
| Case 97 | 3 | 40,237,563  | 41,037,472  | 3 | 0 | 3 | 1 |
| Case 97 | 3 | 41,037,617  | 41,210,298  | 4 | 0 | 4 | 1 |
| Case 97 | 3 | 41,212,753  | 42,994,980  | 3 | 0 | 3 | 1 |
| Case 97 | 3 | 43,005,979  | 43,176,831  | 4 | 0 | 4 | 1 |
| Case 97 | 3 | 43,179,134  | 45,124,371  | 3 | 0 | 3 | 1 |
| Case 97 | 3 | 45,125,566  | 45,853,072  | 4 | 0 | 4 | 1 |
| Case 97 | 3 | 45,855,172  | 46,244,937  | 3 | 0 | 3 | 1 |
| Case 97 | 3 | 46,245,329  | 46,485,035  | 4 | 0 | 4 | 1 |
| Case 97 | 3 | 46,486,841  | 52,817,130  | 3 | 0 | 3 | 1 |
| Case 97 | 3 | 52,817,142  | 53,899,178  | 4 | 0 | 4 | 1 |
| Case 97 | 3 | 53,899,199  | 53,985,919  | 3 | 0 | 3 | 1 |
| Case 97 | 3 | 53,992,218  | 54,819,686  | 4 | 0 | 4 | 1 |
| Case 97 | 3 | 54,825,311  | 55,177,886  | 3 | 0 | 3 | 1 |
| Case 97 | 3 | 55,179,111  | 55,237,738  | 4 | 0 | 4 | 1 |
| Case 97 | 3 | 55,241,137  | 55,733,717  | 3 | 0 | 3 | 1 |
| Case 97 | 3 | 55,734,673  | 56,533,016  | 4 | 0 | 4 | 1 |
| Case 97 | 3 | 56,533,402  | 57,026,693  | 3 | 0 | 3 | 1 |
| Case 97 | 3 | 57,031,469  | 57,134,230  | 4 | 0 | 4 | 1 |
| Case 97 | 3 | 57,136,585  | 58,562,525  | 3 | 0 | 3 | 1 |
| Case 97 | 3 | 58,563,151  | 60,053,331  | 4 | 0 | 4 | 1 |
| Case 97 | 3 | 60,055,347  | 60,059,041  | 1 | 0 | 1 | 0 |
| Case 97 | 3 | 60,062,400  | 60,071,129  | 0 | 0 | 0 | 0 |
| Case 97 | 3 | 60,073,153  | 60,089,378  | 1 | 0 | 1 | 0 |
| Case 97 | 3 | 60,089,571  | 60,110,529  | 0 | 0 | 0 | 0 |
| Case 97 | 3 | 60,116,055  | 60,122,156  | 1 | 0 | 1 | 0 |
| Case 97 | 3 | 60,122,472  | 60,260,504  | 0 | 0 | 0 | 0 |
| Case 97 | 3 | 60,263,721  | 60,299,260  | 1 | 0 | 1 | 0 |
| Case 97 | 3 | 60,305,117  | 60,390,846  | 0 | 0 | 0 | 0 |
| Case 97 | 3 | 60,396,850  | 61,132,698  | 3 | 0 | 3 | 1 |
| Case 97 | 3 | 61,136,894  | 61,348,592  | 4 | 0 | 4 | 1 |
| Case 97 | 3 | 61,356,250  | 62,319,048  | 3 | 0 | 3 | 1 |
| Case 97 | 3 | 62,324,103  | 65,173,884  | 4 | 0 | 4 | 1 |
| Case 97 | 3 | 65,177,996  | 65,522,392  | 2 | 0 | 2 | 1 |
| Case 97 | 3 | 65,523,923  | 65,663,133  | 3 | 0 | 3 | 1 |
| Case 97 | 3 | 65,674,722  | 68,964,333  | 4 | 0 | 4 | 1 |
| Case 97 | 3 | 68,965,552  | 69,506,162  | 3 | 0 | 3 | 1 |
| Case 97 | 3 | 69,508,222  | 69,607,472  | 4 | 0 | 4 | 1 |
| Case 97 | 3 | 69,609,107  | 69,758,426  | 3 | 0 | 3 | 1 |
| Case 97 | 3 | 69,758,910  | 72,126,604  | 4 | 0 | 4 | 1 |
| Case 97 | 3 | 72,126,831  | 73,968,051  | 3 | 0 | 3 | 1 |
| Case 97 | 3 | 73,971,120  | 74,097,623  | 4 | 0 | 4 | 1 |
| Case 97 | 3 | 74,098,901  | 90,442,925  | 3 | 0 | 3 | 1 |
| Case 97 | 3 | 93,537,290  | 97,606,672  | 3 | 0 | 3 | 1 |
| Case 97 | 3 | 97,609,951  | 97,958,635  | 4 | 0 | 4 | 1 |
| Case 97 | 3 | 97,960,399  | 98,814,043  | 3 | 0 | 3 | 1 |
| Case 97 | 3 | 98,831,335  | 99,509,830  | 4 | 0 | 4 | 1 |
| Case 97 | 3 | 99,509,836  | 99,568,791  | 3 | 0 | 3 | 1 |
| Case 97 | 3 | 99,568,956  | 99,990,891  | 4 | 0 | 4 | 1 |
| Case 97 | 3 | 99,998,531  | 100,105,110 | 3 | 0 | 3 | 1 |
| Case 97 | 3 | 100,107,095 | 100,962,917 | 4 | 0 | 4 | 1 |
| Case 97 | 3 | 100,963,154 | 101,540,407 | 3 | 0 | 3 | 1 |
| Case 97 | 3 | 101,540,509 | 102,415,127 | 4 | 0 | 4 | 1 |
| Case 97 | 3 | 102,424,262 | 105,438,994 | 3 | 0 | 3 | 1 |
| Case 97 | 3 | 105,439,026 | 105,717,509 | 4 | 0 | 4 | 1 |

|         |   |             |             |   |   |   |   |
|---------|---|-------------|-------------|---|---|---|---|
| Case 97 | 3 | 105,717,770 | 106,860,495 | 3 | 0 | 3 | 1 |
| Case 97 | 3 | 106,861,626 | 108,117,694 | 4 | 0 | 4 | 1 |
| Case 97 | 3 | 108,119,071 | 110,084,303 | 3 | 0 | 3 | 1 |
| Case 97 | 3 | 110,087,264 | 111,836,355 | 4 | 0 | 4 | 1 |
| Case 97 | 3 | 111,836,566 | 111,990,941 | 3 | 0 | 3 | 1 |
| Case 97 | 3 | 111,993,752 | 113,028,334 | 4 | 0 | 4 | 1 |
| Case 97 | 3 | 113,034,316 | 113,937,999 | 3 | 0 | 3 | 1 |
| Case 97 | 3 | 113,939,244 | 115,162,379 | 4 | 0 | 4 | 1 |
| Case 97 | 3 | 115,192,910 | 115,200,732 | 1 | 0 | 1 | 0 |
| Case 97 | 3 | 115,205,520 | 115,289,876 | 0 | 0 | 0 | 0 |
| Case 97 | 3 | 115,290,089 | 115,293,391 | 1 | 0 | 1 | 0 |
| Case 97 | 3 | 115,297,011 | 115,335,684 | 0 | 0 | 0 | 0 |
| Case 97 | 3 | 115,339,747 | 115,536,212 | 4 | 0 | 4 | 1 |
| Case 97 | 3 | 115,543,891 | 115,596,317 | 1 | 0 | 1 | 0 |
| Case 97 | 3 | 115,598,604 | 115,679,228 | 0 | 0 | 0 | 0 |
| Case 97 | 3 | 115,679,429 | 115,687,191 | 1 | 0 | 1 | 0 |
| Case 97 | 3 | 115,704,434 | 115,786,741 | 4 | 0 | 4 | 1 |
| Case 97 | 3 | 115,789,995 | 116,166,190 | 3 | 0 | 3 | 1 |
| Case 97 | 3 | 116,166,378 | 117,014,065 | 4 | 0 | 4 | 1 |
| Case 97 | 3 | 117,015,399 | 117,194,656 | 3 | 0 | 3 | 1 |
| Case 97 | 3 | 117,200,255 | 117,819,107 | 4 | 0 | 4 | 1 |
| Case 97 | 3 | 117,822,657 | 118,221,011 | 3 | 0 | 3 | 1 |
| Case 97 | 3 | 118,223,589 | 118,501,868 | 4 | 0 | 4 | 1 |
| Case 97 | 3 | 118,502,435 | 118,865,970 | 3 | 0 | 3 | 1 |
| Case 97 | 3 | 118,866,003 | 118,941,441 | 4 | 0 | 4 | 1 |
| Case 97 | 3 | 118,942,956 | 121,723,700 | 3 | 0 | 3 | 1 |
| Case 97 | 3 | 121,724,163 | 122,060,340 | 4 | 0 | 4 | 1 |
| Case 97 | 3 | 122,060,367 | 122,645,304 | 3 | 0 | 3 | 1 |
| Case 97 | 3 | 122,645,440 | 122,894,253 | 4 | 0 | 4 | 1 |
| Case 97 | 3 | 122,894,688 | 122,995,631 | 3 | 0 | 3 | 1 |
| Case 97 | 3 | 123,001,494 | 123,587,569 | 4 | 0 | 4 | 1 |
| Case 97 | 3 | 123,593,561 | 123,686,157 | 3 | 0 | 3 | 1 |
| Case 97 | 3 | 123,687,254 | 124,540,832 | 4 | 0 | 4 | 1 |
| Case 97 | 3 | 124,544,266 | 124,687,767 | 3 | 0 | 3 | 1 |
| Case 97 | 3 | 124,688,269 | 124,967,313 | 4 | 0 | 4 | 1 |
| Case 97 | 3 | 124,979,404 | 125,748,213 | 3 | 0 | 3 | 1 |
| Case 97 | 3 | 125,758,232 | 125,849,031 | 4 | 0 | 4 | 1 |
| Case 97 | 3 | 125,849,099 | 126,756,304 | 3 | 0 | 3 | 1 |
| Case 97 | 3 | 126,757,949 | 127,281,914 | 4 | 0 | 4 | 1 |
| Case 97 | 3 | 127,290,140 | 127,411,064 | 3 | 0 | 3 | 1 |
| Case 97 | 3 | 127,411,093 | 128,243,631 | 4 | 0 | 4 | 1 |
| Case 97 | 3 | 128,245,696 | 129,946,531 | 3 | 0 | 3 | 1 |
| Case 97 | 3 | 129,964,201 | 130,612,466 | 4 | 0 | 4 | 1 |
| Case 97 | 3 | 130,620,210 | 130,742,901 | 3 | 0 | 3 | 1 |
| Case 97 | 3 | 130,743,369 | 131,947,937 | 4 | 0 | 4 | 1 |
| Case 97 | 3 | 131,952,108 | 132,451,038 | 3 | 0 | 3 | 1 |
| Case 97 | 3 | 132,457,395 | 132,860,651 | 4 | 0 | 4 | 1 |
| Case 97 | 3 | 132,862,516 | 132,905,128 | 3 | 0 | 3 | 1 |
| Case 97 | 3 | 132,905,331 | 133,436,136 | 3 | 1 | 4 | 0 |
| Case 97 | 3 | 133,437,778 | 135,643,303 | 3 | 2 | 5 | 0 |
| Case 97 | 3 | 135,648,685 | 136,667,668 | 3 | 1 | 4 | 0 |
| Case 97 | 3 | 136,671,761 | 138,669,236 | 3 | 2 | 5 | 0 |
| Case 97 | 3 | 138,669,289 | 139,292,494 | 2 | 2 | 4 | 0 |
| Case 97 | 3 | 139,294,516 | 141,365,883 | 3 | 2 | 5 | 0 |
| Case 97 | 3 | 141,368,245 | 141,563,276 | 3 | 1 | 4 | 0 |
| Case 97 | 3 | 141,564,786 | 148,962,041 | 3 | 2 | 5 | 0 |
| Case 97 | 3 | 148,964,692 | 148,967,335 | 2 | 0 | 2 | 1 |
| Case 97 | 3 | 148,973,465 | 163,664,285 | 3 | 2 | 5 | 0 |
| Case 97 | 3 | 163,671,071 | 164,083,080 | 3 | 1 | 4 | 0 |
| Case 97 | 3 | 164,087,419 | 175,228,372 | 3 | 2 | 5 | 0 |
| Case 97 | 3 | 175,233,654 | 176,011,401 | 2 | 0 | 2 | 1 |

|         |   |             |             |   |   |   |   |
|---------|---|-------------|-------------|---|---|---|---|
| Case 97 | 3 | 176,014,233 | 178,402,265 | 3 | 2 | 5 | 0 |
| Case 97 | 3 | 178,416,735 | 179,545,261 | 3 | 1 | 4 | 0 |
| Case 97 | 3 | 179,561,502 | 180,304,277 | 3 | 2 | 5 | 0 |
| Case 97 | 3 | 180,311,168 | 180,932,119 | 3 | 1 | 4 | 0 |
| Case 97 | 3 | 180,934,200 | 182,662,324 | 3 | 2 | 5 | 0 |
| Case 97 | 3 | 182,663,516 | 183,017,965 | 3 | 1 | 4 | 0 |
| Case 97 | 3 | 183,020,592 | 183,335,322 | 3 | 2 | 5 | 0 |
| Case 97 | 3 | 183,339,096 | 184,299,085 | 3 | 1 | 4 | 0 |
| Case 97 | 3 | 184,302,634 | 185,175,570 | 3 | 2 | 5 | 0 |
| Case 97 | 3 | 185,180,812 | 185,295,704 | 3 | 1 | 4 | 0 |
| Case 97 | 3 | 185,296,602 | 186,272,719 | 3 | 2 | 5 | 0 |
| Case 97 | 3 | 186,272,721 | 186,606,285 | 3 | 1 | 4 | 0 |
| Case 97 | 3 | 186,609,682 | 194,067,766 | 3 | 2 | 5 | 0 |
| Case 97 | 3 | 194,079,911 | 194,415,887 | 3 | 1 | 4 | 0 |
| Case 97 | 3 | 194,417,029 | 195,238,559 | 3 | 2 | 5 | 0 |
| Case 97 | 3 | 195,240,670 | 195,308,171 | 3 | 1 | 4 | 0 |
| Case 97 | 3 | 195,310,679 | 195,474,126 | 3 | 2 | 5 | 0 |
| Case 97 | 3 | 195,474,138 | 197,838,262 | 3 | 1 | 4 | 0 |
| Case 97 | 4 | 71,566      | 3,519,881   | 3 | 0 | 3 | 1 |
| Case 97 | 4 | 3,519,917   | 3,780,072   | 4 | 0 | 4 | 1 |
| Case 97 | 4 | 3,787,202   | 4,610,628   | 3 | 0 | 3 | 1 |
| Case 97 | 4 | 4,614,187   | 4,860,402   | 4 | 0 | 4 | 1 |
| Case 97 | 4 | 4,861,844   | 5,394,914   | 3 | 0 | 3 | 1 |
| Case 97 | 4 | 5,395,071   | 5,461,855   | 4 | 0 | 4 | 1 |
| Case 97 | 4 | 5,461,893   | 5,803,903   | 3 | 0 | 3 | 1 |
| Case 97 | 4 | 5,804,830   | 6,058,732   | 4 | 0 | 4 | 1 |
| Case 97 | 4 | 6,059,226   | 6,304,118   | 3 | 0 | 3 | 1 |
| Case 97 | 4 | 6,304,124   | 6,575,960   | 4 | 0 | 4 | 1 |
| Case 97 | 4 | 6,577,023   | 6,817,928   | 3 | 0 | 3 | 1 |
| Case 97 | 4 | 6,826,228   | 7,372,806   | 2 | 0 | 2 | 1 |
| Case 97 | 4 | 7,373,836   | 7,428,355   | 4 | 0 | 4 | 1 |
| Case 97 | 4 | 7,431,266   | 7,436,486   | 3 | 0 | 3 | 1 |
| Case 97 | 4 | 7,437,059   | 7,853,361   | 4 | 0 | 4 | 1 |
| Case 97 | 4 | 7,857,293   | 8,086,655   | 3 | 0 | 3 | 1 |
| Case 97 | 4 | 8,089,598   | 8,214,545   | 4 | 0 | 4 | 1 |
| Case 97 | 4 | 8,214,553   | 9,930,962   | 3 | 0 | 3 | 1 |
| Case 97 | 4 | 9,934,744   | 10,440,704  | 4 | 0 | 4 | 1 |
| Case 97 | 4 | 10,444,650  | 10,902,159  | 3 | 0 | 3 | 1 |
| Case 97 | 4 | 10,903,005  | 11,537,238  | 4 | 0 | 4 | 1 |
| Case 97 | 4 | 11,538,001  | 12,297,535  | 3 | 0 | 3 | 1 |
| Case 97 | 4 | 12,303,661  | 12,679,993  | 4 | 0 | 4 | 1 |
| Case 97 | 4 | 12,682,297  | 13,026,562  | 3 | 0 | 3 | 1 |
| Case 97 | 4 | 13,026,792  | 13,102,351  | 4 | 0 | 4 | 1 |
| Case 97 | 4 | 13,102,477  | 15,090,453  | 3 | 0 | 3 | 1 |
| Case 97 | 4 | 15,096,523  | 15,549,778  | 4 | 0 | 4 | 1 |
| Case 97 | 4 | 15,552,295  | 15,707,208  | 3 | 0 | 3 | 1 |
| Case 97 | 4 | 15,707,250  | 17,272,182  | 4 | 0 | 4 | 1 |
| Case 97 | 4 | 17,273,603  | 18,035,250  | 3 | 0 | 3 | 1 |
| Case 97 | 4 | 18,037,800  | 18,522,138  | 4 | 0 | 4 | 1 |
| Case 97 | 4 | 18,553,345  | 21,601,372  | 3 | 0 | 3 | 1 |
| Case 97 | 4 | 21,601,449  | 21,622,448  | 4 | 0 | 4 | 1 |
| Case 97 | 4 | 21,622,793  | 21,770,028  | 2 | 0 | 2 | 1 |
| Case 97 | 4 | 21,778,153  | 22,519,313  | 4 | 0 | 4 | 1 |
| Case 97 | 4 | 22,521,890  | 40,123,399  | 3 | 0 | 3 | 1 |
| Case 97 | 4 | 40,123,462  | 40,158,464  | 2 | 0 | 2 | 1 |
| Case 97 | 4 | 40,162,971  | 42,003,775  | 3 | 0 | 3 | 1 |
| Case 97 | 4 | 42,006,057  | 49,620,898  | 2 | 2 | 4 | 0 |
| Case 97 | 4 | 52,697,856  | 58,639,261  | 2 | 2 | 4 | 0 |
| Case 97 | 4 | 58,642,656  | 59,629,835  | 3 | 1 | 4 | 0 |
| Case 97 | 4 | 59,630,002  | 59,819,545  | 3 | 2 | 5 | 0 |
| Case 97 | 4 | 59,832,091  | 60,344,490  | 2 | 2 | 4 | 0 |



|         |   |             |             |   |   |   |   |
|---------|---|-------------|-------------|---|---|---|---|
| Case 97 | 4 | 60,356,966  | 69,606,943  | 2 | 1 | 3 | 0 |
| Case 97 | 4 | 69,611,505  | 69,611,505  | 2 | 2 | 4 | 0 |
| Case 97 | 4 | 69,613,030  | 70,354,794  | 3 | 0 | 3 | 1 |
| Case 97 | 4 | 70,354,811  | 70,354,811  | 2 | 2 | 4 | 0 |
| Case 97 | 4 | 70,355,211  | 190,963,766 | 2 | 1 | 3 | 0 |
| Case 97 | 5 | 38,139      | 438,564     | 3 | 2 | 5 | 0 |
| Case 97 | 5 | 442,586     | 676,806     | 2 | 2 | 4 | 0 |
| Case 97 | 5 | 677,718     | 1,027,182   | 3 | 2 | 5 | 0 |
| Case 97 | 5 | 1,032,032   | 1,847,639   | 2 | 2 | 4 | 0 |
| Case 97 | 5 | 1,850,220   | 2,137,758   | 3 | 2 | 5 | 0 |
| Case 97 | 5 | 2,140,755   | 45,303,672  | 3 | 1 | 4 | 0 |
| Case 97 | 5 | 45,305,521  | 45,840,303  | 3 | 2 | 5 | 0 |
| Case 97 | 5 | 45,841,630  | 46,399,093  | 3 | 1 | 4 | 0 |
| Case 97 | 5 | 49,457,282  | 139,828,797 | 3 | 1 | 4 | 0 |
| Case 97 | 5 | 139,828,814 | 139,931,384 | 4 | 0 | 4 | 1 |
| Case 97 | 5 | 139,931,607 | 139,931,617 | 1 | 0 | 1 | 0 |
| Case 97 | 5 | 139,931,618 | 139,931,644 | 0 | 0 | 0 | 0 |
| Case 97 | 5 | 139,931,646 | 139,931,652 | 1 | 0 | 1 | 0 |
| Case 97 | 5 | 139,931,653 | 139,936,825 | 3 | 0 | 3 | 1 |
| Case 97 | 5 | 139,936,835 | 161,536,928 | 3 | 1 | 4 | 0 |
| Case 97 | 5 | 161,537,130 | 161,537,130 | 4 | 0 | 4 | 1 |
| Case 97 | 5 | 161,541,735 | 161,546,821 | 1 | 0 | 1 | 0 |
| Case 97 | 5 | 161,561,803 | 161,561,803 | 4 | 0 | 4 | 1 |
| Case 97 | 5 | 161,562,004 | 180,567,719 | 3 | 1 | 4 | 0 |
| Case 97 | 5 | 180,575,250 | 180,579,244 | 3 | 0 | 3 | 1 |
| Case 97 | 5 | 180,579,560 | 180,581,761 | 2 | 2 | 4 | 0 |
| Case 97 | 5 | 180,582,003 | 180,693,127 | 2 | 1 | 3 | 0 |
| Case 97 | 6 | 108,666     | 26,124,243  | 3 | 1 | 4 | 0 |
| Case 97 | 6 | 26,124,303  | 29,459,260  | 4 | 0 | 4 | 1 |
| Case 97 | 6 | 29,461,914  | 31,336,644  | 3 | 1 | 4 | 0 |
| Case 97 | 6 | 31,336,891  | 31,338,528  | 4 | 0 | 4 | 1 |
| Case 97 | 6 | 31,340,075  | 31,341,357  | 1 | 0 | 1 | 0 |
| Case 97 | 6 | 31,342,484  | 31,342,484  | 4 | 0 | 4 | 1 |
| Case 97 | 6 | 31,342,631  | 33,037,453  | 3 | 1 | 4 | 0 |
| Case 97 | 6 | 33,037,454  | 33,398,620  | 4 | 0 | 4 | 1 |
| Case 97 | 6 | 33,399,778  | 58,752,089  | 3 | 1 | 4 | 0 |
| Case 97 | 6 | 61,891,118  | 71,963,483  | 3 | 1 | 4 | 0 |
| Case 97 | 6 | 71,968,427  | 73,746,516  | 4 | 1 | 5 | 0 |
| Case 97 | 6 | 73,749,861  | 75,140,143  | 3 | 1 | 4 | 0 |
| Case 97 | 6 | 75,140,978  | 75,829,467  | 4 | 1 | 5 | 0 |
| Case 97 | 6 | 75,833,070  | 76,741,709  | 3 | 1 | 4 | 0 |
| Case 97 | 6 | 76,744,298  | 83,479,174  | 4 | 1 | 5 | 0 |
| Case 97 | 6 | 83,481,903  | 83,947,458  | 3 | 1 | 4 | 0 |
| Case 97 | 6 | 83,947,495  | 86,870,628  | 4 | 1 | 5 | 0 |
| Case 97 | 6 | 86,874,123  | 88,241,110  | 4 | 0 | 4 | 1 |
| Case 97 | 6 | 88,250,589  | 88,385,579  | 3 | 0 | 3 | 1 |
| Case 97 | 6 | 88,387,600  | 90,442,119  | 4 | 0 | 4 | 1 |
| Case 97 | 6 | 90,442,330  | 90,486,354  | 3 | 0 | 3 | 1 |
| Case 97 | 6 | 90,486,365  | 99,858,695  | 4 | 0 | 4 | 1 |
| Case 97 | 6 | 99,858,828  | 99,936,165  | 3 | 0 | 3 | 1 |
| Case 97 | 6 | 99,939,045  | 119,076,378 | 4 | 0 | 4 | 1 |
| Case 97 | 6 | 119,079,281 | 119,443,290 | 3 | 1 | 4 | 0 |
| Case 97 | 6 | 119,447,352 | 121,402,024 | 4 | 1 | 5 | 0 |
| Case 97 | 6 | 121,412,114 | 122,075,563 | 3 | 1 | 4 | 0 |
| Case 97 | 6 | 122,078,300 | 122,410,187 | 4 | 1 | 5 | 0 |
| Case 97 | 6 | 122,414,296 | 123,148,664 | 3 | 1 | 4 | 0 |
| Case 97 | 6 | 123,154,371 | 123,989,741 | 4 | 1 | 5 | 0 |
| Case 97 | 6 | 124,003,483 | 124,310,248 | 3 | 1 | 4 | 0 |
| Case 97 | 6 | 124,310,564 | 125,172,488 | 4 | 1 | 5 | 0 |
| Case 97 | 6 | 125,175,526 | 125,500,534 | 3 | 1 | 4 | 0 |
| Case 97 | 6 | 125,501,314 | 127,481,154 | 4 | 1 | 5 | 0 |

|         |   |             |             |   |   |   |   |
|---------|---|-------------|-------------|---|---|---|---|
| Case 97 | 6 | 127,483,308 | 128,028,593 | 3 | 1 | 4 | 0 |
| Case 97 | 6 | 128,035,339 | 130,368,508 | 4 | 1 | 5 | 0 |
| Case 97 | 6 | 130,370,485 | 130,608,255 | 3 | 1 | 4 | 0 |
| Case 97 | 6 | 130,611,364 | 131,184,770 | 4 | 1 | 5 | 0 |
| Case 97 | 6 | 131,184,914 | 131,277,586 | 3 | 1 | 4 | 0 |
| Case 97 | 6 | 131,278,669 | 131,897,278 | 4 | 1 | 5 | 0 |
| Case 97 | 6 | 131,897,807 | 132,163,617 | 3 | 1 | 4 | 0 |
| Case 97 | 6 | 132,167,290 | 132,846,134 | 4 | 1 | 5 | 0 |
| Case 97 | 6 | 132,854,027 | 133,126,220 | 3 | 1 | 4 | 0 |
| Case 97 | 6 | 133,132,500 | 133,852,051 | 4 | 1 | 5 | 0 |
| Case 97 | 6 | 133,857,604 | 135,957,359 | 3 | 1 | 4 | 0 |
| Case 97 | 6 | 135,957,792 | 136,475,578 | 4 | 1 | 5 | 0 |
| Case 97 | 6 | 136,482,727 | 137,841,810 | 3 | 1 | 4 | 0 |
| Case 97 | 6 | 137,842,399 | 138,413,333 | 4 | 1 | 5 | 0 |
| Case 97 | 6 | 138,413,360 | 139,989,016 | 3 | 1 | 4 | 0 |
| Case 97 | 6 | 139,990,860 | 144,009,132 | 4 | 1 | 5 | 0 |
| Case 97 | 6 | 144,011,546 | 144,184,557 | 3 | 1 | 4 | 0 |
| Case 97 | 6 | 144,185,414 | 144,640,340 | 4 | 1 | 5 | 0 |
| Case 97 | 6 | 144,641,358 | 145,187,154 | 3 | 1 | 4 | 0 |
| Case 97 | 6 | 145,199,259 | 145,956,611 | 4 | 1 | 5 | 0 |
| Case 97 | 6 | 146,004,677 | 146,870,930 | 3 | 1 | 4 | 0 |
| Case 97 | 6 | 146,872,685 | 148,062,400 | 4 | 1 | 5 | 0 |
| Case 97 | 6 | 148,066,394 | 150,572,208 | 3 | 1 | 4 | 0 |
| Case 97 | 6 | 150,575,200 | 151,048,986 | 4 | 1 | 5 | 0 |
| Case 97 | 6 | 151,055,031 | 152,022,802 | 3 | 1 | 4 | 0 |
| Case 97 | 6 | 152,024,415 | 152,438,103 | 4 | 1 | 5 | 0 |
| Case 97 | 6 | 152,441,587 | 153,551,654 | 3 | 1 | 4 | 0 |
| Case 97 | 6 | 153,559,877 | 153,714,440 | 4 | 1 | 5 | 0 |
| Case 97 | 6 | 153,724,545 | 153,855,165 | 3 | 1 | 4 | 0 |
| Case 97 | 6 | 153,857,936 | 154,274,843 | 4 | 1 | 5 | 0 |
| Case 97 | 6 | 154,278,203 | 155,625,104 | 3 | 1 | 4 | 0 |
| Case 97 | 6 | 155,630,653 | 156,868,110 | 4 | 1 | 5 | 0 |
| Case 97 | 6 | 156,868,655 | 159,672,455 | 3 | 1 | 4 | 0 |
| Case 97 | 6 | 159,672,489 | 159,942,291 | 4 | 1 | 5 | 0 |
| Case 97 | 6 | 159,944,996 | 163,072,782 | 3 | 1 | 4 | 0 |
| Case 97 | 6 | 163,081,812 | 163,326,692 | 4 | 1 | 5 | 0 |
| Case 97 | 6 | 163,328,595 | 170,980,171 | 3 | 1 | 4 | 0 |
| Case 97 | 7 | 44,935      | 3,258,801   | 3 | 2 | 5 | 0 |
| Case 97 | 7 | 3,264,548   | 3,631,115   | 4 | 2 | 6 | 0 |
| Case 97 | 7 | 3,638,547   | 6,876,312   | 3 | 2 | 5 | 0 |
| Case 97 | 7 | 6,901,445   | 13,522,169  | 4 | 2 | 6 | 0 |
| Case 97 | 7 | 13,527,659  | 14,675,706  | 4 | 0 | 4 | 1 |
| Case 97 | 7 | 14,682,282  | 16,408,071  | 4 | 2 | 6 | 0 |
| Case 97 | 7 | 16,409,318  | 19,547,949  | 4 | 1 | 5 | 0 |
| Case 97 | 7 | 19,547,969  | 19,629,693  | 4 | 0 | 4 | 1 |
| Case 97 | 7 | 19,632,320  | 19,642,100  | 3 | 0 | 3 | 1 |
| Case 97 | 7 | 19,644,307  | 20,640,509  | 5 | 0 | 5 | 1 |
| Case 97 | 7 | 20,640,630  | 20,640,630  | 3 | 0 | 3 | 1 |
| Case 97 | 7 | 20,640,689  | 38,268,395  | 4 | 0 | 4 | 1 |
| Case 97 | 7 | 38,268,811  | 38,385,938  | 5 | 0 | 5 | 1 |
| Case 97 | 7 | 38,412,022  | 38,412,022  | 3 | 0 | 3 | 1 |
| Case 97 | 7 | 38,412,988  | 50,512,284  | 4 | 0 | 4 | 1 |
| Case 97 | 7 | 50,512,929  | 50,512,929  | 1 | 0 | 1 | 0 |
| Case 97 | 7 | 50,513,062  | 50,517,271  | 0 | 0 | 0 | 0 |
| Case 97 | 7 | 50,525,420  | 58,019,061  | 4 | 0 | 4 | 1 |
| Case 97 | 7 | 61,056,053  | 61,852,895  | 4 | 0 | 4 | 1 |
| Case 97 | 7 | 61,994,170  | 62,397,642  | 3 | 0 | 3 | 1 |
| Case 97 | 7 | 62,413,547  | 87,997,384  | 4 | 0 | 4 | 1 |
| Case 97 | 7 | 87,999,503  | 88,588,037  | 5 | 0 | 5 | 1 |
| Case 97 | 7 | 88,591,502  | 92,244,422  | 4 | 0 | 4 | 1 |
| Case 97 | 7 | 92,244,486  | 92,244,486  | 3 | 0 | 3 | 1 |

|         |   |             |             |   |   |   |   |
|---------|---|-------------|-------------|---|---|---|---|
| Case 97 | 7 | 92,247,327  | 96,593,097  | 5 | 0 | 5 | 1 |
| Case 97 | 7 | 96,598,826  | 96,598,826  | 3 | 0 | 3 | 1 |
| Case 97 | 7 | 96,605,368  | 103,205,827 | 4 | 0 | 4 | 1 |
| Case 97 | 7 | 103,205,840 | 103,746,862 | 5 | 0 | 5 | 1 |
| Case 97 | 7 | 103,749,889 | 103,749,889 | 3 | 0 | 3 | 1 |
| Case 97 | 7 | 103,759,385 | 107,891,529 | 4 | 0 | 4 | 1 |
| Case 97 | 7 | 107,893,220 | 111,409,724 | 5 | 0 | 5 | 1 |
| Case 97 | 7 | 111,415,150 | 111,630,024 | 3 | 0 | 3 | 1 |
| Case 97 | 7 | 111,632,687 | 112,579,723 | 4 | 0 | 4 | 1 |
| Case 97 | 7 | 112,579,733 | 112,579,733 | 3 | 0 | 3 | 1 |
| Case 97 | 7 | 112,579,920 | 118,570,281 | 5 | 0 | 5 | 1 |
| Case 97 | 7 | 118,570,452 | 118,570,452 | 3 | 0 | 3 | 1 |
| Case 97 | 7 | 118,570,487 | 118,652,797 | 3 | 2 | 5 | 0 |
| Case 97 | 7 | 118,669,625 | 119,469,564 | 4 | 2 | 6 | 0 |
| Case 97 | 7 | 119,493,570 | 122,534,888 | 4 | 1 | 5 | 0 |
| Case 97 | 7 | 122,542,284 | 122,596,254 | 5 | 1 | 6 | 0 |
| Case 97 | 7 | 122,599,299 | 122,599,299 | 3 | 0 | 3 | 1 |
| Case 97 | 7 | 122,601,667 | 126,107,001 | 5 | 0 | 5 | 1 |
| Case 97 | 7 | 126,112,702 | 126,112,702 | 3 | 0 | 3 | 1 |
| Case 97 | 7 | 126,113,335 | 159,119,486 | 4 | 0 | 4 | 1 |
| Case 97 | 8 | 164,984     | 7,007,415   | 2 | 2 | 4 | 0 |
| Case 97 | 8 | 7,308,659   | 7,726,969   | 7 | 0 | 7 | 1 |
| Case 97 | 8 | 7,881,478   | 10,968,189  | 2 | 2 | 4 | 0 |
| Case 97 | 8 | 10,969,075  | 12,181,277  | 7 | 0 | 7 | 1 |
| Case 97 | 8 | 12,483,094  | 17,747,385  | 2 | 2 | 4 | 0 |
| Case 97 | 8 | 17,747,717  | 17,867,211  | 3 | 1 | 4 | 0 |
| Case 97 | 8 | 17,868,775  | 17,868,775  | 3 | 2 | 5 | 0 |
| Case 97 | 8 | 17,868,817  | 43,545,511  | 2 | 2 | 4 | 0 |
| Case 97 | 8 | 43,570,196  | 43,791,691  | 2 | 1 | 3 | 0 |
| Case 97 | 8 | 46,886,735  | 47,469,217  | 2 | 1 | 3 | 0 |
| Case 97 | 8 | 47,471,180  | 59,483,470  | 2 | 2 | 4 | 0 |
| Case 97 | 8 | 59,484,832  | 78,990,829  | 2 | 1 | 3 | 0 |
| Case 97 | 8 | 78,995,713  | 80,903,607  | 4 | 1 | 5 | 0 |
| Case 97 | 8 | 80,909,229  | 81,545,195  | 3 | 1 | 4 | 0 |
| Case 97 | 8 | 81,547,071  | 85,877,421  | 4 | 1 | 5 | 0 |
| Case 97 | 8 | 85,880,705  | 88,411,051  | 3 | 1 | 4 | 0 |
| Case 97 | 8 | 88,411,745  | 90,638,201  | 4 | 1 | 5 | 0 |
| Case 97 | 8 | 90,638,305  | 90,945,833  | 3 | 1 | 4 | 0 |
| Case 97 | 8 | 90,946,056  | 91,483,618  | 4 | 1 | 5 | 0 |
| Case 97 | 8 | 91,488,124  | 92,398,290  | 3 | 1 | 4 | 0 |
| Case 97 | 8 | 92,398,874  | 94,654,207  | 4 | 1 | 5 | 0 |
| Case 97 | 8 | 94,662,817  | 94,934,664  | 3 | 1 | 4 | 0 |
| Case 97 | 8 | 94,938,346  | 95,264,265  | 4 | 1 | 5 | 0 |
| Case 97 | 8 | 95,267,327  | 96,444,628  | 3 | 1 | 4 | 0 |
| Case 97 | 8 | 96,446,676  | 96,904,970  | 4 | 1 | 5 | 0 |
| Case 97 | 8 | 96,905,699  | 99,243,178  | 3 | 1 | 4 | 0 |
| Case 97 | 8 | 99,245,008  | 99,779,588  | 4 | 1 | 5 | 0 |
| Case 97 | 8 | 99,788,975  | 101,691,690 | 3 | 1 | 4 | 0 |
| Case 97 | 8 | 101,705,480 | 101,862,313 | 3 | 2 | 5 | 0 |
| Case 97 | 8 | 101,863,176 | 102,133,555 | 3 | 1 | 4 | 0 |
| Case 97 | 8 | 102,137,549 | 102,293,420 | 4 | 1 | 5 | 0 |
| Case 97 | 8 | 102,295,395 | 102,715,695 | 3 | 1 | 4 | 0 |
| Case 97 | 8 | 102,718,362 | 102,920,114 | 4 | 1 | 5 | 0 |
| Case 97 | 8 | 102,923,137 | 105,906,441 | 3 | 1 | 4 | 0 |
| Case 97 | 8 | 105,912,844 | 106,256,501 | 4 | 1 | 5 | 0 |
| Case 97 | 8 | 106,257,210 | 107,355,371 | 3 | 1 | 4 | 0 |
| Case 97 | 8 | 107,372,260 | 107,582,421 | 4 | 1 | 5 | 0 |
| Case 97 | 8 | 107,585,062 | 107,840,533 | 3 | 1 | 4 | 0 |
| Case 97 | 8 | 107,840,797 | 108,509,502 | 4 | 1 | 5 | 0 |
| Case 97 | 8 | 108,509,677 | 110,616,994 | 3 | 1 | 4 | 0 |
| Case 97 | 8 | 110,622,831 | 110,948,848 | 4 | 1 | 5 | 0 |

|         |   |             |             |   |   |   |   |
|---------|---|-------------|-------------|---|---|---|---|
| Case 97 | 8 | 110,967,302 | 113,516,174 | 3 | 1 | 4 | 0 |
| Case 97 | 8 | 113,518,467 | 114,219,025 | 4 | 1 | 5 | 0 |
| Case 97 | 8 | 114,227,020 | 116,697,380 | 3 | 1 | 4 | 0 |
| Case 97 | 8 | 116,700,847 | 117,109,176 | 4 | 1 | 5 | 0 |
| Case 97 | 8 | 117,113,215 | 118,000,569 | 3 | 1 | 4 | 0 |
| Case 97 | 8 | 118,001,867 | 118,853,829 | 4 | 1 | 5 | 0 |
| Case 97 | 8 | 118,856,307 | 119,300,988 | 3 | 1 | 4 | 0 |
| Case 97 | 8 | 119,303,457 | 120,215,645 | 4 | 1 | 5 | 0 |
| Case 97 | 8 | 120,216,957 | 121,739,448 | 3 | 1 | 4 | 0 |
| Case 97 | 8 | 121,749,124 | 122,498,253 | 4 | 1 | 5 | 0 |
| Case 97 | 8 | 122,501,989 | 124,835,357 | 3 | 1 | 4 | 0 |
| Case 97 | 8 | 124,837,723 | 125,291,320 | 4 | 1 | 5 | 0 |
| Case 97 | 8 | 125,293,035 | 126,798,409 | 3 | 1 | 4 | 0 |
| Case 97 | 8 | 126,799,011 | 127,425,147 | 4 | 1 | 5 | 0 |
| Case 97 | 8 | 127,437,105 | 127,869,423 | 3 | 1 | 4 | 0 |
| Case 97 | 8 | 127,877,348 | 128,548,678 | 4 | 1 | 5 | 0 |
| Case 97 | 8 | 128,550,123 | 129,121,956 | 3 | 1 | 4 | 0 |
| Case 97 | 8 | 129,124,831 | 130,701,417 | 4 | 1 | 5 | 0 |
| Case 97 | 8 | 130,702,280 | 135,003,093 | 3 | 1 | 4 | 0 |
| Case 97 | 8 | 135,005,295 | 135,056,888 | 4 | 0 | 4 | 1 |
| Case 97 | 8 | 135,062,170 | 135,065,947 | 1 | 0 | 1 | 0 |
| Case 97 | 8 | 135,068,340 | 135,070,667 | 4 | 0 | 4 | 1 |
| Case 97 | 8 | 135,077,117 | 146,293,414 | 3 | 1 | 4 | 0 |
| Case 97 | 9 | 46,587      | 9,066,755   | 3 | 0 | 3 | 1 |
| Case 97 | 9 | 9,069,839   | 9,348,102   | 2 | 0 | 2 | 1 |
| Case 97 | 9 | 9,348,853   | 9,506,433   | 3 | 0 | 3 | 1 |
| Case 97 | 9 | 9,516,348   | 10,102,903  | 2 | 0 | 2 | 1 |
| Case 97 | 9 | 10,107,399  | 17,261,209  | 3 | 0 | 3 | 1 |
| Case 97 | 9 | 17,269,437  | 17,391,531  | 2 | 0 | 2 | 1 |
| Case 97 | 9 | 17,394,536  | 17,404,464  | 4 | 0 | 4 | 1 |
| Case 97 | 9 | 17,409,391  | 17,470,126  | 2 | 0 | 2 | 1 |
| Case 97 | 9 | 17,474,085  | 19,162,016  | 3 | 0 | 3 | 1 |
| Case 97 | 9 | 19,163,207  | 19,345,984  | 2 | 0 | 2 | 1 |
| Case 97 | 9 | 19,346,176  | 21,239,720  | 3 | 0 | 3 | 1 |
| Case 97 | 9 | 21,239,850  | 21,239,850  | 1 | 0 | 1 | 0 |
| Case 97 | 9 | 21,255,150  | 21,332,295  | 0 | 0 | 0 | 0 |
| Case 97 | 9 | 21,333,058  | 21,334,396  | 1 | 0 | 1 | 0 |
| Case 97 | 9 | 21,334,735  | 21,481,642  | 0 | 0 | 0 | 0 |
| Case 97 | 9 | 21,485,974  | 21,504,203  | 1 | 0 | 1 | 0 |
| Case 97 | 9 | 21,504,973  | 21,555,445  | 0 | 0 | 0 | 0 |
| Case 97 | 9 | 21,565,674  | 21,606,786  | 1 | 0 | 1 | 0 |
| Case 97 | 9 | 21,611,256  | 21,826,387  | 0 | 0 | 0 | 0 |
| Case 97 | 9 | 21,830,479  | 21,857,303  | 1 | 0 | 1 | 0 |
| Case 97 | 9 | 21,861,552  | 22,451,371  | 0 | 0 | 0 | 0 |
| Case 97 | 9 | 22,451,501  | 22,451,906  | 1 | 0 | 1 | 0 |
| Case 97 | 9 | 22,454,125  | 22,614,985  | 0 | 0 | 0 | 0 |
| Case 97 | 9 | 22,616,426  | 26,867,333  | 3 | 0 | 3 | 1 |
| Case 97 | 9 | 26,869,532  | 27,066,281  | 2 | 0 | 2 | 1 |
| Case 97 | 9 | 27,074,233  | 31,955,694  | 3 | 0 | 3 | 1 |
| Case 97 | 9 | 31,970,850  | 31,970,850  | 4 | 0 | 4 | 1 |
| Case 97 | 9 | 31,977,623  | 33,367,088  | 4 | 2 | 6 | 0 |
| Case 97 | 9 | 33,367,523  | 33,466,088  | 3 | 2 | 5 | 0 |
| Case 97 | 9 | 33,466,142  | 34,607,766  | 4 | 2 | 6 | 0 |
| Case 97 | 9 | 34,610,330  | 34,743,681  | 3 | 2 | 5 | 0 |
| Case 97 | 9 | 34,759,890  | 35,041,604  | 4 | 2 | 6 | 0 |
| Case 97 | 9 | 35,042,268  | 35,101,909  | 4 | 1 | 5 | 0 |
| Case 97 | 9 | 35,102,743  | 35,674,204  | 4 | 2 | 6 | 0 |
| Case 97 | 9 | 35,674,208  | 35,811,215  | 3 | 2 | 5 | 0 |
| Case 97 | 9 | 35,811,228  | 35,881,628  | 4 | 2 | 6 | 0 |
| Case 97 | 9 | 35,887,412  | 35,908,488  | 2 | 2 | 4 | 0 |
| Case 97 | 9 | 35,910,945  | 36,110,806  | 3 | 2 | 5 | 0 |

|         |    |             |             |   |   |   |   |
|---------|----|-------------|-------------|---|---|---|---|
| Case 97 | 9  | 36,113,712  | 36,173,934  | 2 | 2 | 4 | 0 |
| Case 97 | 9  | 36,186,264  | 43,127,335  | 3 | 2 | 5 | 0 |
| Case 97 | 9  | 43,314,125  | 46,944,322  | 3 | 1 | 4 | 0 |
| Case 97 | 9  | 65,629,772  | 140,243,566 | 3 | 1 | 4 | 0 |
| Case 97 | 9  | 140,243,573 | 140,268,976 | 3 | 0 | 3 | 1 |
| Case 97 | 9  | 140,271,414 | 141,066,491 | 3 | 1 | 4 | 0 |
| Case 97 | 10 | 98,087      | 1,753,115   | 3 | 2 | 5 | 0 |
| Case 97 | 10 | 1,753,194   | 2,163,119   | 4 | 2 | 6 | 0 |
| Case 97 | 10 | 2,165,018   | 2,205,704   | 3 | 2 | 5 | 0 |
| Case 97 | 10 | 2,208,519   | 2,743,897   | 4 | 2 | 6 | 0 |
| Case 97 | 10 | 2,744,038   | 4,237,510   | 3 | 2 | 5 | 0 |
| Case 97 | 10 | 4,238,622   | 4,832,920   | 4 | 2 | 6 | 0 |
| Case 97 | 10 | 4,833,049   | 5,008,383   | 3 | 2 | 5 | 0 |
| Case 97 | 10 | 5,009,364   | 5,389,209   | 4 | 2 | 6 | 0 |
| Case 97 | 10 | 5,390,759   | 6,786,045   | 3 | 2 | 5 | 0 |
| Case 97 | 10 | 6,788,713   | 6,952,360   | 4 | 2 | 6 | 0 |
| Case 97 | 10 | 6,954,586   | 8,660,095   | 3 | 2 | 5 | 0 |
| Case 97 | 10 | 8,660,732   | 8,834,391   | 4 | 2 | 6 | 0 |
| Case 97 | 10 | 8,839,830   | 9,546,541   | 3 | 2 | 5 | 0 |
| Case 97 | 10 | 9,550,386   | 10,192,591  | 4 | 2 | 6 | 0 |
| Case 97 | 10 | 10,194,028  | 10,436,135  | 3 | 2 | 5 | 0 |
| Case 97 | 10 | 10,444,276  | 10,624,738  | 4 | 2 | 6 | 0 |
| Case 97 | 10 | 10,626,134  | 10,743,956  | 3 | 2 | 5 | 0 |
| Case 97 | 10 | 10,752,363  | 10,918,103  | 4 | 2 | 6 | 0 |
| Case 97 | 10 | 10,922,068  | 11,067,117  | 3 | 2 | 5 | 0 |
| Case 97 | 10 | 11,075,133  | 11,231,831  | 4 | 2 | 6 | 0 |
| Case 97 | 10 | 11,234,033  | 14,137,810  | 3 | 2 | 5 | 0 |
| Case 97 | 10 | 14,145,486  | 14,427,216  | 4 | 2 | 6 | 0 |
| Case 97 | 10 | 14,428,263  | 14,496,265  | 3 | 2 | 5 | 0 |
| Case 97 | 10 | 14,498,050  | 14,731,449  | 4 | 2 | 6 | 0 |
| Case 97 | 10 | 14,733,465  | 15,617,571  | 3 | 2 | 5 | 0 |
| Case 97 | 10 | 15,618,479  | 16,100,091  | 4 | 2 | 6 | 0 |
| Case 97 | 10 | 16,116,747  | 16,975,190  | 3 | 2 | 5 | 0 |
| Case 97 | 10 | 16,976,226  | 17,052,955  | 4 | 2 | 6 | 0 |
| Case 97 | 10 | 17,059,462  | 17,340,342  | 3 | 2 | 5 | 0 |
| Case 97 | 10 | 17,340,415  | 17,362,784  | 4 | 2 | 6 | 0 |
| Case 97 | 10 | 17,362,991  | 17,394,523  | 3 | 2 | 5 | 0 |
| Case 97 | 10 | 17,395,500  | 17,548,038  | 4 | 2 | 6 | 0 |
| Case 97 | 10 | 17,554,259  | 17,889,596  | 3 | 2 | 5 | 0 |
| Case 97 | 10 | 17,891,594  | 18,520,535  | 4 | 2 | 6 | 0 |
| Case 97 | 10 | 18,522,109  | 18,993,303  | 3 | 2 | 5 | 0 |
| Case 97 | 10 | 18,996,761  | 19,814,842  | 4 | 2 | 6 | 0 |
| Case 97 | 10 | 19,820,560  | 19,990,132  | 3 | 2 | 5 | 0 |
| Case 97 | 10 | 20,002,736  | 37,316,573  | 2 | 2 | 4 | 0 |
| Case 97 | 10 | 37,323,786  | 39,011,138  | 4 | 0 | 4 | 1 |
| Case 97 | 10 | 39,030,136  | 39,097,912  | 3 | 0 | 3 | 1 |
| Case 97 | 10 | 42,436,301  | 42,794,377  | 3 | 0 | 3 | 1 |
| Case 97 | 10 | 42,810,976  | 44,886,206  | 3 | 1 | 4 | 0 |
| Case 97 | 10 | 44,887,235  | 45,431,416  | 3 | 2 | 5 | 0 |
| Case 97 | 10 | 45,432,386  | 51,908,856  | 3 | 1 | 4 | 0 |
| Case 97 | 10 | 52,002,204  | 52,108,830  | 3 | 2 | 5 | 0 |
| Case 97 | 10 | 52,109,375  | 52,897,074  | 3 | 1 | 4 | 0 |
| Case 97 | 10 | 52,897,900  | 53,015,492  | 3 | 2 | 5 | 0 |
| Case 97 | 10 | 53,018,107  | 53,260,753  | 3 | 1 | 4 | 0 |
| Case 97 | 10 | 53,261,988  | 53,445,667  | 3 | 2 | 5 | 0 |
| Case 97 | 10 | 53,454,071  | 53,721,665  | 3 | 1 | 4 | 0 |
| Case 97 | 10 | 53,727,464  | 53,944,877  | 3 | 2 | 5 | 0 |
| Case 97 | 10 | 53,945,382  | 54,175,474  | 3 | 1 | 4 | 0 |
| Case 97 | 10 | 54,175,591  | 54,405,487  | 3 | 2 | 5 | 0 |
| Case 97 | 10 | 54,408,006  | 54,575,721  | 3 | 1 | 4 | 0 |
| Case 97 | 10 | 54,583,109  | 55,104,497  | 3 | 2 | 5 | 0 |

|         |    |             |             |   |   |   |   |
|---------|----|-------------|-------------|---|---|---|---|
| Case 97 | 10 | 55,107,805  | 58,564,731  | 3 | 1 | 4 | 0 |
| Case 97 | 10 | 58,573,238  | 58,702,440  | 3 | 2 | 5 | 0 |
| Case 97 | 10 | 58,721,707  | 58,725,991  | 2 | 2 | 4 | 0 |
| Case 97 | 10 | 58,730,014  | 60,562,980  | 3 | 1 | 4 | 0 |
| Case 97 | 10 | 60,565,959  | 61,004,817  | 3 | 2 | 5 | 0 |
| Case 97 | 10 | 61,005,244  | 61,966,755  | 3 | 1 | 4 | 0 |
| Case 97 | 10 | 61,967,879  | 64,414,634  | 3 | 2 | 5 | 0 |
| Case 97 | 10 | 64,414,641  | 66,442,823  | 3 | 1 | 4 | 0 |
| Case 97 | 10 | 66,448,472  | 66,938,581  | 3 | 2 | 5 | 0 |
| Case 97 | 10 | 66,940,792  | 70,101,417  | 3 | 1 | 4 | 0 |
| Case 97 | 10 | 70,101,436  | 70,210,004  | 3 | 0 | 3 | 1 |
| Case 97 | 10 | 70,213,168  | 91,484,835  | 3 | 1 | 4 | 0 |
| Case 97 | 10 | 91,487,648  | 91,518,638  | 3 | 0 | 3 | 1 |
| Case 97 | 10 | 91,520,368  | 111,581,612 | 3 | 1 | 4 | 0 |
| Case 97 | 10 | 111,585,360 | 115,006,062 | 3 | 0 | 3 | 1 |
| Case 97 | 10 | 115,010,255 | 115,409,840 | 4 | 0 | 4 | 1 |
| Case 97 | 10 | 115,410,197 | 124,086,757 | 3 | 0 | 3 | 1 |
| Case 97 | 10 | 124,087,092 | 124,122,430 | 4 | 0 | 4 | 1 |
| Case 97 | 10 | 124,122,632 | 124,237,612 | 3 | 0 | 3 | 1 |
| Case 97 | 10 | 124,239,437 | 124,431,063 | 4 | 0 | 4 | 1 |
| Case 97 | 10 | 124,436,530 | 129,111,606 | 3 | 0 | 3 | 1 |
| Case 97 | 10 | 129,117,721 | 129,263,589 | 4 | 0 | 4 | 1 |
| Case 97 | 10 | 129,264,247 | 135,477,883 | 3 | 0 | 3 | 1 |
| Case 97 | 11 | 193,146     | 4,552,102   | 3 | 0 | 3 | 1 |
| Case 97 | 11 | 4,560,369   | 5,022,036   | 4 | 0 | 4 | 1 |
| Case 97 | 11 | 5,026,200   | 5,535,007   | 3 | 0 | 3 | 1 |
| Case 97 | 11 | 5,535,529   | 5,628,072   | 4 | 0 | 4 | 1 |
| Case 97 | 11 | 5,630,635   | 5,844,353   | 3 | 0 | 3 | 1 |
| Case 97 | 11 | 5,845,004   | 6,029,540   | 4 | 0 | 4 | 1 |
| Case 97 | 11 | 6,030,442   | 6,898,525   | 3 | 0 | 3 | 1 |
| Case 97 | 11 | 6,898,540   | 6,913,540   | 4 | 0 | 4 | 1 |
| Case 97 | 11 | 6,913,725   | 7,488,051   | 3 | 0 | 3 | 1 |
| Case 97 | 11 | 7,488,341   | 7,690,483   | 4 | 0 | 4 | 1 |
| Case 97 | 11 | 7,690,873   | 8,261,298   | 3 | 0 | 3 | 1 |
| Case 97 | 11 | 8,262,401   | 8,424,590   | 4 | 0 | 4 | 1 |
| Case 97 | 11 | 8,430,938   | 10,656,687  | 3 | 0 | 3 | 1 |
| Case 97 | 11 | 10,658,735  | 10,691,721  | 4 | 0 | 4 | 1 |
| Case 97 | 11 | 10,693,584  | 11,037,708  | 3 | 0 | 3 | 1 |
| Case 97 | 11 | 11,038,332  | 11,120,206  | 4 | 0 | 4 | 1 |
| Case 97 | 11 | 11,121,557  | 11,169,808  | 3 | 0 | 3 | 1 |
| Case 97 | 11 | 11,172,701  | 11,809,438  | 4 | 0 | 4 | 1 |
| Case 97 | 11 | 11,811,025  | 11,866,815  | 3 | 0 | 3 | 1 |
| Case 97 | 11 | 11,868,549  | 12,040,870  | 4 | 0 | 4 | 1 |
| Case 97 | 11 | 12,041,496  | 12,084,910  | 3 | 0 | 3 | 1 |
| Case 97 | 11 | 12,089,056  | 13,402,409  | 4 | 0 | 4 | 1 |
| Case 97 | 11 | 13,402,787  | 13,974,866  | 3 | 0 | 3 | 1 |
| Case 97 | 11 | 13,975,534  | 14,072,663  | 4 | 0 | 4 | 1 |
| Case 97 | 11 | 14,073,705  | 14,918,308  | 3 | 0 | 3 | 1 |
| Case 97 | 11 | 14,921,880  | 15,177,259  | 4 | 0 | 4 | 1 |
| Case 97 | 11 | 15,177,950  | 15,247,313  | 3 | 0 | 3 | 1 |
| Case 97 | 11 | 15,247,355  | 16,474,547  | 4 | 0 | 4 | 1 |
| Case 97 | 11 | 16,480,518  | 16,759,078  | 3 | 0 | 3 | 1 |
| Case 97 | 11 | 16,760,244  | 16,897,595  | 4 | 0 | 4 | 1 |
| Case 97 | 11 | 16,902,268  | 17,418,752  | 3 | 0 | 3 | 1 |
| Case 97 | 11 | 17,419,279  | 17,877,603  | 4 | 0 | 4 | 1 |
| Case 97 | 11 | 17,878,564  | 19,235,154  | 3 | 0 | 3 | 1 |
| Case 97 | 11 | 19,238,380  | 20,138,670  | 4 | 0 | 4 | 1 |
| Case 97 | 11 | 20,139,768  | 20,545,376  | 3 | 0 | 3 | 1 |
| Case 97 | 11 | 20,545,926  | 20,907,061  | 4 | 0 | 4 | 1 |
| Case 97 | 11 | 20,907,067  | 21,104,020  | 3 | 0 | 3 | 1 |
| Case 97 | 11 | 21,107,429  | 21,594,896  | 4 | 0 | 4 | 1 |

|         |    |             |             |   |   |   |   |
|---------|----|-------------|-------------|---|---|---|---|
| Case 97 | 11 | 21,596,539  | 26,508,441  | 3 | 0 | 3 | 1 |
| Case 97 | 11 | 26,514,931  | 26,692,742  | 4 | 0 | 4 | 1 |
| Case 97 | 11 | 26,692,773  | 32,449,799  | 3 | 1 | 4 | 0 |
| Case 97 | 11 | 32,450,067  | 32,495,550  | 4 | 0 | 4 | 1 |
| Case 97 | 11 | 32,498,355  | 33,477,930  | 3 | 0 | 3 | 1 |
| Case 97 | 11 | 33,498,468  | 51,591,253  | 3 | 1 | 4 | 0 |
| Case 97 | 11 | 54,794,237  | 59,738,667  | 3 | 1 | 4 | 0 |
| Case 97 | 11 | 59,742,575  | 60,111,152  | 3 | 2 | 5 | 0 |
| Case 97 | 11 | 60,112,812  | 78,473,085  | 3 | 1 | 4 | 0 |
| Case 97 | 11 | 78,474,794  | 78,608,890  | 3 | 2 | 5 | 0 |
| Case 97 | 11 | 78,621,360  | 133,223,524 | 3 | 1 | 4 | 0 |
| Case 97 | 11 | 133,225,805 | 133,412,141 | 4 | 1 | 5 | 0 |
| Case 97 | 11 | 133,412,491 | 134,696,354 | 3 | 1 | 4 | 0 |
| Case 97 | 11 | 134,705,943 | 134,934,063 | 4 | 1 | 5 | 0 |
| Case 97 | 12 | 191,619     | 401,960     | 4 | 0 | 4 | 1 |
| Case 97 | 12 | 402,118     | 520,947     | 3 | 0 | 3 | 1 |
| Case 97 | 12 | 521,010     | 638,166     | 4 | 0 | 4 | 1 |
| Case 97 | 12 | 644,337     | 662,597     | 3 | 0 | 3 | 1 |
| Case 97 | 12 | 662,605     | 724,279     | 4 | 0 | 4 | 1 |
| Case 97 | 12 | 736,714     | 1,563,871   | 3 | 0 | 3 | 1 |
| Case 97 | 12 | 1,565,144   | 1,646,931   | 4 | 0 | 4 | 1 |
| Case 97 | 12 | 1,649,616   | 2,133,967   | 3 | 0 | 3 | 1 |
| Case 97 | 12 | 2,135,026   | 2,760,761   | 4 | 0 | 4 | 1 |
| Case 97 | 12 | 2,760,829   | 3,234,893   | 3 | 0 | 3 | 1 |
| Case 97 | 12 | 3,238,008   | 3,954,556   | 4 | 0 | 4 | 1 |
| Case 97 | 12 | 3,958,713   | 4,243,222   | 3 | 0 | 3 | 1 |
| Case 97 | 12 | 4,243,749   | 4,416,304   | 4 | 0 | 4 | 1 |
| Case 97 | 12 | 4,417,127   | 4,676,252   | 3 | 0 | 3 | 1 |
| Case 97 | 12 | 4,677,211   | 6,063,142   | 4 | 0 | 4 | 1 |
| Case 97 | 12 | 6,066,357   | 6,247,564   | 3 | 0 | 3 | 1 |
| Case 97 | 12 | 6,248,983   | 6,428,039   | 4 | 0 | 4 | 1 |
| Case 97 | 12 | 6,428,206   | 6,935,460   | 3 | 0 | 3 | 1 |
| Case 97 | 12 | 6,935,631   | 6,975,506   | 4 | 0 | 4 | 1 |
| Case 97 | 12 | 6,976,296   | 7,085,107   | 3 | 0 | 3 | 1 |
| Case 97 | 12 | 7,085,171   | 7,254,674   | 4 | 0 | 4 | 1 |
| Case 97 | 12 | 7,256,077   | 7,993,316   | 3 | 0 | 3 | 1 |
| Case 97 | 12 | 8,000,912   | 8,101,326   | 3 | 2 | 5 | 0 |
| Case 97 | 12 | 8,102,386   | 8,123,306   | 2 | 2 | 4 | 0 |
| Case 97 | 12 | 8,125,745   | 9,483,768   | 3 | 0 | 3 | 1 |
| Case 97 | 12 | 9,484,047   | 9,668,380   | 4 | 0 | 4 | 1 |
| Case 97 | 12 | 9,737,858   | 9,739,449   | 1 | 0 | 1 | 0 |
| Case 97 | 12 | 9,739,885   | 9,745,606   | 0 | 0 | 0 | 0 |
| Case 97 | 12 | 9,747,466   | 10,750,848  | 3 | 0 | 3 | 1 |
| Case 97 | 12 | 10,754,314  | 11,344,304  | 4 | 0 | 4 | 1 |
| Case 97 | 12 | 11,346,562  | 11,767,406  | 3 | 0 | 3 | 1 |
| Case 97 | 12 | 11,768,462  | 12,172,270  | 4 | 0 | 4 | 1 |
| Case 97 | 12 | 12,173,711  | 12,944,138  | 3 | 0 | 3 | 1 |
| Case 97 | 12 | 12,949,882  | 14,288,015  | 4 | 0 | 4 | 1 |
| Case 97 | 12 | 14,289,567  | 14,773,933  | 3 | 0 | 3 | 1 |
| Case 97 | 12 | 14,773,976  | 14,966,165  | 4 | 0 | 4 | 1 |
| Case 97 | 12 | 14,975,984  | 15,035,081  | 3 | 0 | 3 | 1 |
| Case 97 | 12 | 15,035,086  | 17,076,332  | 4 | 0 | 4 | 1 |
| Case 97 | 12 | 17,092,672  | 18,686,733  | 3 | 0 | 3 | 1 |
| Case 97 | 12 | 18,690,977  | 19,259,778  | 4 | 0 | 4 | 1 |
| Case 97 | 12 | 19,265,921  | 20,523,050  | 3 | 0 | 3 | 1 |
| Case 97 | 12 | 20,523,123  | 20,637,601  | 4 | 0 | 4 | 1 |
| Case 97 | 12 | 20,640,164  | 21,532,325  | 3 | 0 | 3 | 1 |
| Case 97 | 12 | 21,536,131  | 21,761,315  | 2 | 0 | 2 | 1 |
| Case 97 | 12 | 21,780,851  | 24,130,158  | 4 | 0 | 4 | 1 |
| Case 97 | 12 | 24,134,983  | 24,149,417  | 2 | 0 | 2 | 1 |
| Case 97 | 12 | 24,161,050  | 34,263,134  | 4 | 0 | 4 | 1 |

|         |    |             |             |   |   |   |   |
|---------|----|-------------|-------------|---|---|---|---|
| Case 97 | 12 | 34,266,694  | 34,853,011  | 3 | 0 | 3 | 1 |
| Case 97 | 12 | 37,876,400  | 46,436,825  | 3 | 0 | 3 | 1 |
| Case 97 | 12 | 46,439,995  | 47,465,082  | 4 | 0 | 4 | 1 |
| Case 97 | 12 | 47,471,037  | 48,237,287  | 3 | 0 | 3 | 1 |
| Case 97 | 12 | 48,237,303  | 48,412,410  | 4 | 0 | 4 | 1 |
| Case 97 | 12 | 48,414,058  | 53,505,327  | 3 | 0 | 3 | 1 |
| Case 97 | 12 | 53,509,433  | 58,382,895  | 5 | 0 | 5 | 1 |
| Case 97 | 12 | 58,383,580  | 58,750,002  | 6 | 0 | 6 | 1 |
| Case 97 | 12 | 58,750,305  | 58,750,305  | 7 | 0 | 7 | 1 |
| Case 97 | 12 | 58,750,680  | 58,750,680  | 2 | 2 | 4 | 0 |
| Case 97 | 12 | 58,757,312  | 64,311,518  | 3 | 0 | 3 | 1 |
| Case 97 | 12 | 64,312,610  | 65,269,030  | 5 | 0 | 5 | 1 |
| Case 97 | 12 | 65,269,047  | 65,269,047  | 3 | 0 | 3 | 1 |
| Case 97 | 12 | 65,270,150  | 77,464,566  | 6 | 0 | 6 | 1 |
| Case 97 | 12 | 77,465,521  | 79,729,864  | 7 | 0 | 7 | 1 |
| Case 97 | 12 | 79,737,843  | 79,737,843  | 3 | 0 | 3 | 1 |
| Case 97 | 12 | 79,738,884  | 81,893,534  | 6 | 0 | 6 | 1 |
| Case 97 | 12 | 81,901,318  | 82,448,055  | 7 | 0 | 7 | 1 |
| Case 97 | 12 | 82,449,008  | 82,451,399  | 2 | 2 | 4 | 0 |
| Case 97 | 12 | 82,452,264  | 84,848,921  | 6 | 0 | 6 | 1 |
| Case 97 | 12 | 84,875,392  | 86,373,935  | 7 | 0 | 7 | 1 |
| Case 97 | 12 | 86,377,300  | 86,444,015  | 0 | 0 | 0 | 0 |
| Case 97 | 12 | 86,444,588  | 86,451,478  | 1 | 0 | 1 | 0 |
| Case 97 | 12 | 86,462,952  | 88,376,891  | 0 | 0 | 0 | 0 |
| Case 97 | 12 | 88,379,752  | 88,379,788  | 1 | 0 | 1 | 0 |
| Case 97 | 12 | 88,380,094  | 88,530,520  | 0 | 0 | 0 | 0 |
| Case 97 | 12 | 88,531,716  | 88,536,588  | 1 | 0 | 1 | 0 |
| Case 97 | 12 | 88,538,932  | 88,719,207  | 0 | 0 | 0 | 0 |
| Case 97 | 12 | 88,724,745  | 88,746,811  | 1 | 0 | 1 | 0 |
| Case 97 | 12 | 88,754,155  | 89,062,426  | 0 | 0 | 0 | 0 |
| Case 97 | 12 | 89,064,805  | 89,255,847  | 1 | 0 | 1 | 0 |
| Case 97 | 12 | 89,258,855  | 89,325,877  | 0 | 0 | 0 | 0 |
| Case 97 | 12 | 89,328,335  | 89,345,231  | 1 | 0 | 1 | 0 |
| Case 97 | 12 | 89,349,282  | 89,425,822  | 0 | 0 | 0 | 0 |
| Case 97 | 12 | 89,435,177  | 89,462,206  | 1 | 0 | 1 | 0 |
| Case 97 | 12 | 89,462,969  | 89,517,750  | 0 | 0 | 0 | 0 |
| Case 97 | 12 | 89,526,446  | 89,640,358  | 1 | 0 | 1 | 0 |
| Case 97 | 12 | 89,642,084  | 89,744,637  | 0 | 0 | 0 | 0 |
| Case 97 | 12 | 89,744,658  | 89,753,901  | 1 | 0 | 1 | 0 |
| Case 97 | 12 | 89,756,327  | 89,916,666  | 0 | 0 | 0 | 0 |
| Case 97 | 12 | 89,916,781  | 89,962,420  | 1 | 0 | 1 | 0 |
| Case 97 | 12 | 89,966,654  | 90,060,586  | 0 | 0 | 0 | 0 |
| Case 97 | 12 | 90,062,662  | 90,762,140  | 3 | 0 | 3 | 1 |
| Case 97 | 12 | 90,768,440  | 90,777,525  | 1 | 0 | 1 | 0 |
| Case 97 | 12 | 90,781,158  | 91,064,171  | 0 | 0 | 0 | 0 |
| Case 97 | 12 | 91,068,508  | 92,175,176  | 3 | 0 | 3 | 1 |
| Case 97 | 12 | 92,177,908  | 92,586,065  | 4 | 0 | 4 | 1 |
| Case 97 | 12 | 92,592,701  | 133,810,935 | 3 | 0 | 3 | 1 |
| Case 97 | 13 | 19,058,717  | 64,864,846  | 3 | 2 | 5 | 0 |
| Case 97 | 13 | 64,872,920  | 69,282,276  | 3 | 1 | 4 | 0 |
| Case 97 | 13 | 69,282,388  | 95,825,391  | 3 | 2 | 5 | 0 |
| Case 97 | 13 | 95,825,604  | 95,858,276  | 2 | 2 | 4 | 0 |
| Case 97 | 13 | 95,858,285  | 113,770,081 | 3 | 2 | 5 | 0 |
| Case 97 | 13 | 113,770,651 | 114,538,587 | 2 | 2 | 4 | 0 |
| Case 97 | 13 | 114,538,600 | 115,103,529 | 3 | 2 | 5 | 0 |
| Case 97 | 14 | 19,280,733  | 20,420,338  | 3 | 0 | 3 | 1 |
| Case 97 | 14 | 20,425,051  | 20,960,168  | 4 | 0 | 4 | 1 |
| Case 97 | 14 | 20,960,462  | 21,052,414  | 3 | 0 | 3 | 1 |
| Case 97 | 14 | 21,052,474  | 21,546,629  | 4 | 0 | 4 | 1 |
| Case 97 | 14 | 21,546,635  | 22,069,068  | 3 | 0 | 3 | 1 |
| Case 97 | 14 | 22,069,702  | 23,081,528  | 4 | 0 | 4 | 1 |



|         |    |            |             |   |   |   |   |
|---------|----|------------|-------------|---|---|---|---|
| Case 97 | 14 | 23,081,926 | 23,568,376  | 3 | 0 | 3 | 1 |
| Case 97 | 14 | 23,568,494 | 23,619,902  | 4 | 0 | 4 | 1 |
| Case 97 | 14 | 23,623,003 | 23,829,206  | 3 | 0 | 3 | 1 |
| Case 97 | 14 | 23,829,220 | 23,888,744  | 4 | 0 | 4 | 1 |
| Case 97 | 14 | 23,891,518 | 24,572,049  | 3 | 0 | 3 | 1 |
| Case 97 | 14 | 24,572,367 | 26,776,879  | 4 | 0 | 4 | 1 |
| Case 97 | 14 | 26,778,348 | 30,279,983  | 3 | 0 | 3 | 1 |
| Case 97 | 14 | 30,289,850 | 31,354,707  | 4 | 0 | 4 | 1 |
| Case 97 | 14 | 31,354,967 | 32,341,906  | 3 | 0 | 3 | 1 |
| Case 97 | 14 | 32,342,702 | 34,790,349  | 4 | 0 | 4 | 1 |
| Case 97 | 14 | 34,794,727 | 36,453,341  | 3 | 0 | 3 | 1 |
| Case 97 | 14 | 36,454,651 | 37,396,393  | 4 | 0 | 4 | 1 |
| Case 97 | 14 | 37,400,841 | 37,418,720  | 3 | 1 | 4 | 0 |
| Case 97 | 14 | 37,420,572 | 40,121,890  | 3 | 0 | 3 | 1 |
| Case 97 | 14 | 40,123,222 | 40,674,941  | 4 | 0 | 4 | 1 |
| Case 97 | 14 | 40,675,945 | 40,807,588  | 3 | 0 | 3 | 1 |
| Case 97 | 14 | 40,813,580 | 40,907,992  | 4 | 0 | 4 | 1 |
| Case 97 | 14 | 40,910,680 | 50,100,501  | 3 | 0 | 3 | 1 |
| Case 97 | 14 | 50,100,886 | 50,161,828  | 2 | 0 | 2 | 1 |
| Case 97 | 14 | 50,164,452 | 58,768,299  | 3 | 0 | 3 | 1 |
| Case 97 | 14 | 58,768,403 | 58,955,530  | 2 | 0 | 2 | 1 |
| Case 97 | 14 | 58,958,865 | 64,479,852  | 3 | 0 | 3 | 1 |
| Case 97 | 14 | 64,483,247 | 64,497,950  | 2 | 0 | 2 | 1 |
| Case 97 | 14 | 64,497,978 | 107,287,663 | 3 | 0 | 3 | 1 |
| Case 97 | 15 | 20,034,919 | 22,369,360  | 3 | 1 | 4 | 0 |
| Case 97 | 15 | 22,382,854 | 24,521,050  | 3 | 0 | 3 | 1 |
| Case 97 | 15 | 24,521,698 | 24,521,698  | 1 | 0 | 1 | 0 |
| Case 97 | 15 | 24,525,505 | 24,668,007  | 0 | 0 | 0 | 0 |
| Case 97 | 15 | 24,728,780 | 26,186,429  | 3 | 0 | 3 | 1 |
| Case 97 | 15 | 26,186,776 | 26,918,169  | 4 | 0 | 4 | 1 |
| Case 97 | 15 | 26,922,278 | 27,268,034  | 3 | 0 | 3 | 1 |
| Case 97 | 15 | 27,275,236 | 28,422,245  | 4 | 0 | 4 | 1 |
| Case 97 | 15 | 28,422,644 | 29,892,225  | 3 | 0 | 3 | 1 |
| Case 97 | 15 | 29,892,281 | 30,249,159  | 4 | 0 | 4 | 1 |
| Case 97 | 15 | 30,250,899 | 31,266,616  | 3 | 0 | 3 | 1 |
| Case 97 | 15 | 31,267,147 | 32,509,892  | 4 | 0 | 4 | 1 |
| Case 97 | 15 | 32,510,510 | 32,955,095  | 3 | 0 | 3 | 1 |
| Case 97 | 15 | 32,958,711 | 34,358,325  | 4 | 0 | 4 | 1 |
| Case 97 | 15 | 34,373,344 | 34,671,124  | 3 | 0 | 3 | 1 |
| Case 97 | 15 | 34,718,594 | 35,162,510  | 4 | 0 | 4 | 1 |
| Case 97 | 15 | 35,165,366 | 35,354,197  | 3 | 0 | 3 | 1 |
| Case 97 | 15 | 35,359,944 | 40,558,460  | 4 | 0 | 4 | 1 |
| Case 97 | 15 | 40,558,467 | 40,562,987  | 3 | 0 | 3 | 1 |
| Case 97 | 15 | 40,564,441 | 40,856,989  | 4 | 0 | 4 | 1 |
| Case 97 | 15 | 40,859,277 | 41,069,619  | 3 | 0 | 3 | 1 |
| Case 97 | 15 | 41,071,757 | 41,220,900  | 4 | 0 | 4 | 1 |
| Case 97 | 15 | 41,222,183 | 42,117,432  | 3 | 0 | 3 | 1 |
| Case 97 | 15 | 42,117,627 | 42,143,327  | 4 | 0 | 4 | 1 |
| Case 97 | 15 | 42,143,486 | 42,185,157  | 3 | 0 | 3 | 1 |
| Case 97 | 15 | 42,185,482 | 42,684,389  | 4 | 0 | 4 | 1 |
| Case 97 | 15 | 42,684,455 | 43,479,363  | 3 | 0 | 3 | 1 |
| Case 97 | 15 | 43,481,528 | 43,621,524  | 4 | 0 | 4 | 1 |
| Case 97 | 15 | 43,621,739 | 43,653,546  | 3 | 0 | 3 | 1 |
| Case 97 | 15 | 43,653,851 | 44,456,647  | 4 | 0 | 4 | 1 |
| Case 97 | 15 | 44,457,653 | 45,393,008  | 3 | 0 | 3 | 1 |
| Case 97 | 15 | 45,393,418 | 45,652,889  | 4 | 0 | 4 | 1 |
| Case 97 | 15 | 45,653,367 | 45,872,269  | 3 | 0 | 3 | 1 |
| Case 97 | 15 | 45,878,015 | 50,669,718  | 4 | 0 | 4 | 1 |
| Case 97 | 15 | 50,672,420 | 51,233,901  | 3 | 0 | 3 | 1 |
| Case 97 | 15 | 51,237,910 | 55,139,748  | 4 | 0 | 4 | 1 |
| Case 97 | 15 | 55,140,204 | 56,285,723  | 3 | 0 | 3 | 1 |

|         |    |             |             |   |   |   |   |
|---------|----|-------------|-------------|---|---|---|---|
| Case 97 | 15 | 56,286,313  | 62,135,139  | 4 | 0 | 4 | 1 |
| Case 97 | 15 | 62,135,922  | 62,316,036  | 3 | 0 | 3 | 1 |
| Case 97 | 15 | 62,319,307  | 63,889,730  | 4 | 0 | 4 | 1 |
| Case 97 | 15 | 63,889,823  | 65,489,295  | 3 | 0 | 3 | 1 |
| Case 97 | 15 | 65,489,347  | 65,553,347  | 4 | 0 | 4 | 1 |
| Case 97 | 15 | 65,555,508  | 66,223,266  | 3 | 0 | 3 | 1 |
| Case 97 | 15 | 66,232,910  | 66,612,917  | 4 | 0 | 4 | 1 |
| Case 97 | 15 | 66,613,009  | 66,857,095  | 3 | 0 | 3 | 1 |
| Case 97 | 15 | 66,857,141  | 72,105,913  | 4 | 0 | 4 | 1 |
| Case 97 | 15 | 72,106,363  | 72,451,247  | 3 | 0 | 3 | 1 |
| Case 97 | 15 | 72,451,827  | 72,699,027  | 4 | 0 | 4 | 1 |
| Case 97 | 15 | 72,699,549  | 73,019,968  | 3 | 0 | 3 | 1 |
| Case 97 | 15 | 73,023,682  | 74,615,507  | 4 | 0 | 4 | 1 |
| Case 97 | 15 | 74,617,839  | 74,627,335  | 3 | 0 | 3 | 1 |
| Case 97 | 15 | 74,627,499  | 74,920,532  | 4 | 0 | 4 | 1 |
| Case 97 | 15 | 74,925,045  | 75,257,488  | 3 | 0 | 3 | 1 |
| Case 97 | 15 | 75,271,128  | 75,499,135  | 4 | 0 | 4 | 1 |
| Case 97 | 15 | 75,499,257  | 75,942,219  | 3 | 0 | 3 | 1 |
| Case 97 | 15 | 75,942,326  | 76,696,901  | 4 | 0 | 4 | 1 |
| Case 97 | 15 | 76,696,914  | 77,154,862  | 3 | 0 | 3 | 1 |
| Case 97 | 15 | 77,164,361  | 78,315,497  | 4 | 0 | 4 | 1 |
| Case 97 | 15 | 78,316,533  | 78,390,414  | 3 | 0 | 3 | 1 |
| Case 97 | 15 | 78,390,794  | 78,758,213  | 4 | 0 | 4 | 1 |
| Case 97 | 15 | 78,758,677  | 78,882,694  | 3 | 0 | 3 | 1 |
| Case 97 | 15 | 78,882,726  | 79,167,118  | 4 | 0 | 4 | 1 |
| Case 97 | 15 | 79,173,005  | 79,237,257  | 3 | 0 | 3 | 1 |
| Case 97 | 15 | 79,241,976  | 83,611,095  | 4 | 0 | 4 | 1 |
| Case 97 | 15 | 83,615,274  | 83,905,102  | 3 | 0 | 3 | 1 |
| Case 97 | 15 | 83,920,383  | 90,126,094  | 4 | 0 | 4 | 1 |
| Case 97 | 15 | 90,126,121  | 90,210,219  | 3 | 0 | 3 | 1 |
| Case 97 | 15 | 90,210,237  | 90,598,171  | 4 | 0 | 4 | 1 |
| Case 97 | 15 | 90,600,049  | 90,784,953  | 3 | 0 | 3 | 1 |
| Case 97 | 15 | 90,785,060  | 91,205,608  | 4 | 0 | 4 | 1 |
| Case 97 | 15 | 91,211,701  | 91,347,430  | 3 | 0 | 3 | 1 |
| Case 97 | 15 | 91,347,451  | 100,934,847 | 4 | 0 | 4 | 1 |
| Case 97 | 15 | 100,937,762 | 101,124,829 | 3 | 0 | 3 | 1 |
| Case 97 | 15 | 101,125,082 | 102,461,162 | 4 | 0 | 4 | 1 |
| Case 97 | 16 | 88,165      | 5,234,811   | 3 | 1 | 4 | 0 |
| Case 97 | 16 | 5,243,669   | 5,353,565   | 4 | 1 | 5 | 0 |
| Case 97 | 16 | 5,354,211   | 8,088,550   | 3 | 1 | 4 | 0 |
| Case 97 | 16 | 8,089,528   | 8,330,492   | 4 | 1 | 5 | 0 |
| Case 97 | 16 | 8,332,873   | 9,598,191   | 3 | 1 | 4 | 0 |
| Case 97 | 16 | 9,598,990   | 9,805,919   | 4 | 1 | 5 | 0 |
| Case 97 | 16 | 9,807,418   | 9,885,027   | 3 | 1 | 4 | 0 |
| Case 97 | 16 | 9,890,958   | 10,418,771  | 4 | 1 | 5 | 0 |
| Case 97 | 16 | 10,423,631  | 11,930,337  | 3 | 1 | 4 | 0 |
| Case 97 | 16 | 11,931,682  | 11,944,161  | 3 | 0 | 3 | 1 |
| Case 97 | 16 | 11,944,422  | 17,615,227  | 3 | 1 | 4 | 0 |
| Case 97 | 16 | 17,621,919  | 18,000,101  | 4 | 1 | 5 | 0 |
| Case 97 | 16 | 18,010,009  | 19,279,380  | 3 | 1 | 4 | 0 |
| Case 97 | 16 | 19,280,235  | 19,428,850  | 4 | 1 | 5 | 0 |
| Case 97 | 16 | 19,428,874  | 20,028,998  | 3 | 1 | 4 | 0 |
| Case 97 | 16 | 20,030,832  | 20,244,780  | 4 | 1 | 5 | 0 |
| Case 97 | 16 | 20,246,798  | 24,202,615  | 3 | 1 | 4 | 0 |
| Case 97 | 16 | 24,205,100  | 24,368,796  | 4 | 1 | 5 | 0 |
| Case 97 | 16 | 24,370,251  | 25,611,572  | 3 | 1 | 4 | 0 |
| Case 97 | 16 | 25,616,371  | 25,669,862  | 4 | 1 | 5 | 0 |
| Case 97 | 16 | 25,671,004  | 25,879,109  | 5 | 1 | 6 | 0 |
| Case 97 | 16 | 25,881,959  | 25,904,991  | 4 | 1 | 5 | 0 |
| Case 97 | 16 | 25,906,665  | 35,285,582  | 3 | 1 | 4 | 0 |
| Case 97 | 16 | 46,450,037  | 46,820,464  | 3 | 1 | 4 | 0 |

|         |    |            |            |   |   |   |   |
|---------|----|------------|------------|---|---|---|---|
| Case 97 | 16 | 46,826,312 | 78,903,101 | 4 | 0 | 4 | 1 |
| Case 97 | 16 | 78,911,101 | 78,911,336 | 1 | 0 | 1 | 0 |
| Case 97 | 16 | 78,914,000 | 78,953,857 | 0 | 0 | 0 | 0 |
| Case 97 | 16 | 78,955,140 | 78,979,747 | 1 | 0 | 1 | 0 |
| Case 97 | 16 | 78,980,401 | 78,983,840 | 0 | 0 | 0 | 0 |
| Case 97 | 16 | 78,984,136 | 78,992,542 | 1 | 0 | 1 | 0 |
| Case 97 | 16 | 78,994,882 | 78,997,613 | 0 | 0 | 0 | 0 |
| Case 97 | 16 | 78,999,644 | 79,013,032 | 1 | 0 | 1 | 0 |
| Case 97 | 16 | 79,013,587 | 90,274,695 | 4 | 0 | 4 | 1 |
| Case 97 | 17 | 11,885     | 781,407    | 2 | 2 | 4 | 0 |
| Case 97 | 17 | 781,533    | 6,114,873  | 3 | 0 | 3 | 1 |
| Case 97 | 17 | 6,118,115  | 6,173,106  | 2 | 2 | 4 | 0 |
| Case 97 | 17 | 6,191,010  | 6,733,677  | 3 | 2 | 5 | 0 |
| Case 97 | 17 | 6,738,521  | 7,584,400  | 2 | 2 | 4 | 0 |
| Case 97 | 17 | 7,591,761  | 7,594,710  | 3 | 0 | 3 | 1 |
| Case 97 | 17 | 7,597,478  | 8,943,063  | 2 | 2 | 4 | 0 |
| Case 97 | 17 | 8,956,285  | 15,039,528 | 3 | 0 | 3 | 1 |
| Case 97 | 17 | 15,044,804 | 15,044,804 | 1 | 0 | 1 | 0 |
| Case 97 | 17 | 15,047,699 | 15,058,236 | 0 | 0 | 0 | 0 |
| Case 97 | 17 | 15,058,991 | 19,699,121 | 3 | 0 | 3 | 1 |
| Case 97 | 17 | 19,700,933 | 19,843,127 | 2 | 0 | 2 | 1 |
| Case 97 | 17 | 19,848,450 | 22,242,355 | 3 | 0 | 3 | 1 |
| Case 97 | 17 | 25,268,142 | 25,295,032 | 3 | 0 | 3 | 1 |
| Case 97 | 17 | 25,329,949 | 34,432,735 | 2 | 2 | 4 | 0 |
| Case 97 | 17 | 34,436,532 | 34,597,521 | 3 | 2 | 5 | 0 |
| Case 97 | 17 | 34,815,551 | 52,467,631 | 2 | 2 | 4 | 0 |
| Case 97 | 17 | 52,483,122 | 52,845,350 | 3 | 0 | 3 | 1 |
| Case 97 | 17 | 52,847,941 | 75,989,901 | 2 | 2 | 4 | 0 |
| Case 97 | 17 | 75,992,693 | 75,995,207 | 3 | 1 | 4 | 0 |
| Case 97 | 17 | 76,012,854 | 76,276,774 | 4 | 1 | 5 | 0 |
| Case 97 | 17 | 76,287,707 | 76,290,948 | 3 | 2 | 5 | 0 |
| Case 97 | 17 | 76,301,199 | 81,060,040 | 2 | 2 | 4 | 0 |
| Case 97 | 18 | 87,505     | 694,268    | 3 | 0 | 3 | 1 |
| Case 97 | 18 | 706,478    | 1,830,927  | 4 | 0 | 4 | 1 |
| Case 97 | 18 | 1,833,682  | 2,451,072  | 5 | 0 | 5 | 1 |
| Case 97 | 18 | 2,451,449  | 2,451,449  | 3 | 0 | 3 | 1 |
| Case 97 | 18 | 2,452,252  | 3,687,162  | 4 | 0 | 4 | 1 |
| Case 97 | 18 | 3,693,772  | 6,474,496  | 2 | 0 | 2 | 1 |
| Case 97 | 18 | 6,480,844  | 6,497,116  | 1 | 0 | 1 | 0 |
| Case 97 | 18 | 6,499,960  | 6,645,865  | 0 | 0 | 0 | 0 |
| Case 97 | 18 | 6,646,386  | 6,647,165  | 1 | 0 | 1 | 0 |
| Case 97 | 18 | 6,647,278  | 6,726,843  | 0 | 0 | 0 | 0 |
| Case 97 | 18 | 6,728,421  | 6,741,913  | 1 | 0 | 1 | 0 |
| Case 97 | 18 | 6,752,265  | 6,784,082  | 0 | 0 | 0 | 0 |
| Case 97 | 18 | 6,790,732  | 6,816,601  | 1 | 0 | 1 | 0 |
| Case 97 | 18 | 6,819,047  | 6,853,195  | 0 | 0 | 0 | 0 |
| Case 97 | 18 | 6,854,453  | 6,894,888  | 1 | 0 | 1 | 0 |
| Case 97 | 18 | 6,895,491  | 6,940,286  | 0 | 0 | 0 | 0 |
| Case 97 | 18 | 6,940,522  | 6,956,194  | 1 | 0 | 1 | 0 |
| Case 97 | 18 | 6,956,238  | 6,961,610  | 0 | 0 | 0 | 0 |
| Case 97 | 18 | 6,961,680  | 6,978,233  | 1 | 0 | 1 | 0 |
| Case 97 | 18 | 6,978,321  | 6,985,655  | 0 | 0 | 0 | 0 |
| Case 97 | 18 | 6,986,213  | 6,992,271  | 1 | 0 | 1 | 0 |
| Case 97 | 18 | 6,992,680  | 7,008,901  | 0 | 0 | 0 | 0 |
| Case 97 | 18 | 7,009,293  | 7,054,431  | 1 | 0 | 1 | 0 |
| Case 97 | 18 | 7,063,532  | 7,167,872  | 0 | 0 | 0 | 0 |
| Case 97 | 18 | 7,168,722  | 7,169,461  | 1 | 0 | 1 | 0 |
| Case 97 | 18 | 7,169,723  | 7,231,996  | 0 | 0 | 0 | 0 |
| Case 97 | 18 | 7,232,892  | 7,264,395  | 1 | 0 | 1 | 0 |
| Case 97 | 18 | 7,264,458  | 7,369,439  | 0 | 0 | 0 | 0 |
| Case 97 | 18 | 7,369,572  | 7,386,868  | 1 | 0 | 1 | 0 |

|         |    |            |            |   |   |   |   |
|---------|----|------------|------------|---|---|---|---|
| Case 97 | 18 | 7,388,258  | 7,436,203  | 0 | 0 | 0 | 0 |
| Case 97 | 18 | 7,438,097  | 7,501,993  | 1 | 0 | 1 | 0 |
| Case 97 | 18 | 7,503,256  | 7,584,667  | 0 | 0 | 0 | 0 |
| Case 97 | 18 | 7,584,939  | 7,677,822  | 1 | 0 | 1 | 0 |
| Case 97 | 18 | 7,678,218  | 7,688,439  | 0 | 0 | 0 | 0 |
| Case 97 | 18 | 7,688,505  | 7,810,110  | 1 | 0 | 1 | 0 |
| Case 97 | 18 | 7,814,669  | 7,870,864  | 0 | 0 | 0 | 0 |
| Case 97 | 18 | 7,871,278  | 7,888,320  | 1 | 0 | 1 | 0 |
| Case 97 | 18 | 7,890,128  | 7,936,616  | 0 | 0 | 0 | 0 |
| Case 97 | 18 | 7,944,247  | 7,981,018  | 1 | 0 | 1 | 0 |
| Case 97 | 18 | 7,990,588  | 8,020,992  | 0 | 0 | 0 | 0 |
| Case 97 | 18 | 8,028,829  | 8,069,868  | 1 | 0 | 1 | 0 |
| Case 97 | 18 | 8,074,027  | 8,193,657  | 0 | 0 | 0 | 0 |
| Case 97 | 18 | 8,194,809  | 8,218,296  | 1 | 0 | 1 | 0 |
| Case 97 | 18 | 8,227,344  | 8,238,538  | 0 | 0 | 0 | 0 |
| Case 97 | 18 | 8,241,986  | 8,244,205  | 1 | 0 | 1 | 0 |
| Case 97 | 18 | 8,244,335  | 8,271,135  | 0 | 0 | 0 | 0 |
| Case 97 | 18 | 8,275,857  | 8,298,732  | 1 | 0 | 1 | 0 |
| Case 97 | 18 | 8,298,813  | 8,337,540  | 0 | 0 | 0 | 0 |
| Case 97 | 18 | 8,340,623  | 8,374,771  | 1 | 0 | 1 | 0 |
| Case 97 | 18 | 8,374,911  | 8,384,848  | 0 | 0 | 0 | 0 |
| Case 97 | 18 | 8,386,122  | 8,391,634  | 1 | 0 | 1 | 0 |
| Case 97 | 18 | 8,392,719  | 8,427,063  | 0 | 0 | 0 | 0 |
| Case 97 | 18 | 8,429,650  | 8,438,294  | 1 | 0 | 1 | 0 |
| Case 97 | 18 | 8,438,408  | 8,462,678  | 0 | 0 | 0 | 0 |
| Case 97 | 18 | 8,467,173  | 8,487,961  | 1 | 0 | 1 | 0 |
| Case 97 | 18 | 8,490,288  | 8,495,190  | 0 | 0 | 0 | 0 |
| Case 97 | 18 | 8,499,765  | 8,501,545  | 1 | 0 | 1 | 0 |
| Case 97 | 18 | 8,503,530  | 8,505,193  | 0 | 0 | 0 | 0 |
| Case 97 | 18 | 8,506,458  | 8,506,957  | 1 | 0 | 1 | 0 |
| Case 97 | 18 | 8,507,522  | 8,511,586  | 0 | 0 | 0 | 0 |
| Case 97 | 18 | 8,513,569  | 8,517,847  | 1 | 0 | 1 | 0 |
| Case 97 | 18 | 8,518,201  | 8,640,411  | 0 | 0 | 0 | 0 |
| Case 97 | 18 | 8,641,331  | 8,663,213  | 1 | 0 | 1 | 0 |
| Case 97 | 18 | 8,664,894  | 8,715,990  | 0 | 0 | 0 | 0 |
| Case 97 | 18 | 8,716,090  | 8,726,629  | 1 | 0 | 1 | 0 |
| Case 97 | 18 | 8,730,053  | 9,254,406  | 2 | 0 | 2 | 1 |
| Case 97 | 18 | 9,254,447  | 9,255,707  | 1 | 0 | 1 | 0 |
| Case 97 | 18 | 9,255,718  | 14,988,113 | 2 | 0 | 2 | 1 |
| Case 97 | 18 | 14,994,970 | 15,375,878 | 3 | 0 | 3 | 1 |
| Case 97 | 18 | 18,520,354 | 19,721,331 | 3 | 0 | 3 | 1 |
| Case 97 | 18 | 19,723,649 | 20,461,282 | 4 | 0 | 4 | 1 |
| Case 97 | 18 | 20,462,455 | 20,709,123 | 2 | 0 | 2 | 1 |
| Case 97 | 18 | 20,716,414 | 20,824,373 | 3 | 0 | 3 | 1 |
| Case 97 | 18 | 20,828,972 | 22,781,850 | 2 | 0 | 2 | 1 |
| Case 97 | 18 | 22,783,059 | 22,807,011 | 3 | 0 | 3 | 1 |
| Case 97 | 18 | 22,808,077 | 25,503,620 | 2 | 0 | 2 | 1 |
| Case 97 | 18 | 25,506,994 | 25,529,697 | 1 | 0 | 1 | 0 |
| Case 97 | 18 | 25,532,080 | 28,934,374 | 2 | 0 | 2 | 1 |
| Case 97 | 18 | 28,934,375 | 28,935,292 | 3 | 0 | 3 | 1 |
| Case 97 | 18 | 28,935,375 | 29,426,774 | 2 | 0 | 2 | 1 |
| Case 97 | 18 | 29,429,596 | 29,433,881 | 1 | 0 | 1 | 0 |
| Case 97 | 18 | 29,435,668 | 29,450,901 | 2 | 0 | 2 | 1 |
| Case 97 | 18 | 29,450,933 | 29,487,446 | 1 | 0 | 1 | 0 |
| Case 97 | 18 | 29,488,804 | 30,783,224 | 2 | 0 | 2 | 1 |
| Case 97 | 18 | 30,791,889 | 30,795,592 | 1 | 0 | 1 | 0 |
| Case 97 | 18 | 30,803,075 | 33,725,931 | 2 | 0 | 2 | 1 |
| Case 97 | 18 | 33,726,005 | 33,744,465 | 1 | 0 | 1 | 0 |
| Case 97 | 18 | 33,744,702 | 42,530,507 | 2 | 0 | 2 | 1 |
| Case 97 | 18 | 42,530,788 | 42,543,105 | 3 | 0 | 3 | 1 |
| Case 97 | 18 | 42,546,291 | 47,362,880 | 2 | 0 | 2 | 1 |

|         |    |            |            |   |   |   |   |
|---------|----|------------|------------|---|---|---|---|
| Case 97 | 18 | 47,363,125 | 47,364,071 | 4 | 0 | 4 | 1 |
| Case 97 | 18 | 47,365,005 | 47,375,552 | 3 | 0 | 3 | 1 |
| Case 97 | 18 | 47,375,981 | 48,100,072 | 2 | 0 | 2 | 1 |
| Case 97 | 18 | 48,106,595 | 48,190,659 | 3 | 0 | 3 | 1 |
| Case 97 | 18 | 48,190,785 | 54,693,531 | 2 | 0 | 2 | 1 |
| Case 97 | 18 | 54,694,151 | 54,763,828 | 3 | 0 | 3 | 1 |
| Case 97 | 18 | 54,765,729 | 56,151,138 | 2 | 0 | 2 | 1 |
| Case 97 | 18 | 56,154,571 | 56,204,489 | 3 | 0 | 3 | 1 |
| Case 97 | 18 | 56,204,644 | 63,827,587 | 2 | 0 | 2 | 1 |
| Case 97 | 18 | 63,841,290 | 63,851,968 | 1 | 0 | 1 | 0 |
| Case 97 | 18 | 63,858,105 | 64,232,938 | 2 | 0 | 2 | 1 |
| Case 97 | 18 | 64,235,665 | 64,235,877 | 1 | 0 | 1 | 0 |
| Case 97 | 18 | 64,235,922 | 71,714,278 | 2 | 0 | 2 | 1 |
| Case 97 | 18 | 71,728,552 | 73,609,353 | 4 | 0 | 4 | 1 |
| Case 97 | 18 | 73,611,759 | 73,752,499 | 3 | 0 | 3 | 1 |
| Case 97 | 18 | 73,761,401 | 74,091,961 | 4 | 0 | 4 | 1 |
| Case 97 | 18 | 74,091,962 | 77,170,505 | 3 | 0 | 3 | 1 |
| Case 97 | 18 | 77,170,543 | 77,585,701 | 4 | 0 | 4 | 1 |
| Case 97 | 18 | 77,585,900 | 78,015,180 | 3 | 0 | 3 | 1 |
| Case 97 | 19 | 260,912    | 11,942,721 | 2 | 1 | 3 | 0 |
| Case 97 | 19 | 11,942,771 | 11,978,629 | 3 | 0 | 3 | 1 |
| Case 97 | 19 | 11,979,164 | 12,484,585 | 2 | 0 | 2 | 1 |
| Case 97 | 19 | 12,486,228 | 12,530,177 | 3 | 0 | 3 | 1 |
| Case 97 | 19 | 12,530,752 | 12,530,752 | 2 | 2 | 4 | 0 |
| Case 97 | 19 | 12,532,330 | 20,209,589 | 2 | 1 | 3 | 0 |
| Case 97 | 19 | 20,211,540 | 23,089,596 | 1 | 1 | 2 | 0 |
| Case 97 | 19 | 23,106,374 | 23,106,374 | 4 | 0 | 4 | 1 |
| Case 97 | 19 | 23,118,399 | 23,248,069 | 3 | 0 | 3 | 1 |
| Case 97 | 19 | 23,255,154 | 23,257,207 | 2 | 2 | 4 | 0 |
| Case 97 | 19 | 23,279,003 | 24,545,366 | 2 | 1 | 3 | 0 |
| Case 97 | 19 | 24,629,285 | 24,629,285 | 2 | 2 | 4 | 0 |
| Case 97 | 19 | 27,732,159 | 34,309,277 | 2 | 2 | 4 | 0 |
| Case 97 | 19 | 34,309,532 | 34,984,490 | 2 | 1 | 3 | 0 |
| Case 97 | 19 | 34,984,792 | 35,992,792 | 2 | 2 | 4 | 0 |
| Case 97 | 19 | 35,996,380 | 36,245,187 | 2 | 1 | 3 | 0 |
| Case 97 | 19 | 36,245,367 | 36,275,163 | 2 | 2 | 4 | 0 |
| Case 97 | 19 | 36,276,767 | 37,442,926 | 2 | 1 | 3 | 0 |
| Case 97 | 19 | 37,455,903 | 38,036,725 | 2 | 2 | 4 | 0 |
| Case 97 | 19 | 38,042,814 | 38,160,893 | 2 | 1 | 3 | 0 |
| Case 97 | 19 | 38,167,971 | 38,319,897 | 2 | 2 | 4 | 0 |
| Case 97 | 19 | 38,320,814 | 38,818,925 | 3 | 2 | 5 | 0 |
| Case 97 | 19 | 38,824,344 | 40,502,943 | 2 | 2 | 4 | 0 |
| Case 97 | 19 | 40,513,191 | 42,967,023 | 3 | 0 | 3 | 1 |
| Case 97 | 19 | 42,986,983 | 44,309,002 | 2 | 2 | 4 | 0 |
| Case 97 | 19 | 44,318,199 | 44,331,810 | 3 | 2 | 5 | 0 |
| Case 97 | 19 | 44,332,161 | 44,500,761 | 4 | 2 | 6 | 0 |
| Case 97 | 19 | 44,500,952 | 44,586,169 | 3 | 2 | 5 | 0 |
| Case 97 | 19 | 44,589,909 | 45,971,095 | 2 | 2 | 4 | 0 |
| Case 97 | 19 | 45,971,941 | 46,997,972 | 3 | 2 | 5 | 0 |
| Case 97 | 19 | 46,998,236 | 47,035,325 | 4 | 2 | 6 | 0 |
| Case 97 | 19 | 47,035,436 | 47,545,719 | 3 | 2 | 5 | 0 |
| Case 97 | 19 | 47,546,120 | 47,969,980 | 2 | 2 | 4 | 0 |
| Case 97 | 19 | 47,970,406 | 48,163,540 | 3 | 2 | 5 | 0 |
| Case 97 | 19 | 48,166,730 | 48,398,117 | 2 | 2 | 4 | 0 |
| Case 97 | 19 | 48,401,329 | 48,538,258 | 3 | 2 | 5 | 0 |
| Case 97 | 19 | 48,542,135 | 48,647,197 | 2 | 2 | 4 | 0 |
| Case 97 | 19 | 48,652,800 | 49,460,915 | 3 | 2 | 5 | 0 |
| Case 97 | 19 | 49,461,305 | 50,440,559 | 2 | 2 | 4 | 0 |
| Case 97 | 19 | 50,444,061 | 51,678,482 | 3 | 2 | 5 | 0 |
| Case 97 | 19 | 51,679,367 | 52,381,731 | 5 | 1 | 6 | 0 |
| Case 97 | 19 | 52,381,754 | 53,997,114 | 6 | 1 | 7 | 0 |

|         |    |            |            |   |   |   |   |
|---------|----|------------|------------|---|---|---|---|
| Case 97 | 19 | 54,010,277 | 54,010,277 | 2 | 2 | 4 | 0 |
| Case 97 | 19 | 54,010,759 | 54,010,759 | 3 | 2 | 5 | 0 |
| Case 97 | 19 | 54,011,384 | 56,699,244 | 5 | 1 | 6 | 0 |
| Case 97 | 19 | 56,701,233 | 57,868,483 | 3 | 0 | 3 | 1 |
| Case 97 | 19 | 57,868,685 | 57,939,619 | 2 | 0 | 2 | 1 |
| Case 97 | 19 | 57,949,426 | 58,436,041 | 3 | 0 | 3 | 1 |
| Case 97 | 19 | 58,437,524 | 58,453,949 | 2 | 0 | 2 | 1 |
| Case 97 | 19 | 58,453,958 | 59,097,160 | 3 | 0 | 3 | 1 |
| Case 97 | 20 | 63,244     | 80,655     | 4 | 1 | 5 | 0 |
| Case 97 | 20 | 90,984     | 238,530    | 5 | 1 | 6 | 0 |
| Case 97 | 20 | 239,724    | 1,397,898  | 4 | 1 | 5 | 0 |
| Case 97 | 20 | 1,403,686  | 1,499,127  | 5 | 1 | 6 | 0 |
| Case 97 | 20 | 1,512,273  | 1,969,193  | 4 | 1 | 5 | 0 |
| Case 97 | 20 | 1,969,934  | 2,077,456  | 5 | 1 | 6 | 0 |
| Case 97 | 20 | 2,077,610  | 4,169,079  | 4 | 1 | 5 | 0 |
| Case 97 | 20 | 4,169,459  | 4,680,094  | 5 | 1 | 6 | 0 |
| Case 97 | 20 | 4,680,290  | 5,294,865  | 4 | 1 | 5 | 0 |
| Case 97 | 20 | 5,296,005  | 5,372,073  | 5 | 1 | 6 | 0 |
| Case 97 | 20 | 5,376,681  | 5,715,193  | 4 | 1 | 5 | 0 |
| Case 97 | 20 | 5,716,015  | 5,842,518  | 5 | 1 | 6 | 0 |
| Case 97 | 20 | 5,843,479  | 6,091,054  | 4 | 1 | 5 | 0 |
| Case 97 | 20 | 6,091,175  | 10,560,458 | 5 | 1 | 6 | 0 |
| Case 97 | 20 | 10,562,658 | 10,632,306 | 4 | 1 | 5 | 0 |
| Case 97 | 20 | 10,633,188 | 16,199,322 | 5 | 1 | 6 | 0 |
| Case 97 | 20 | 16,202,021 | 16,367,806 | 4 | 1 | 5 | 0 |
| Case 97 | 20 | 16,368,336 | 17,904,819 | 5 | 1 | 6 | 0 |
| Case 97 | 20 | 17,909,932 | 18,198,446 | 4 | 1 | 5 | 0 |
| Case 97 | 20 | 18,201,837 | 19,870,852 | 5 | 1 | 6 | 0 |
| Case 97 | 20 | 19,871,586 | 20,080,132 | 4 | 1 | 5 | 0 |
| Case 97 | 20 | 20,085,998 | 20,320,836 | 5 | 1 | 6 | 0 |
| Case 97 | 20 | 20,322,489 | 20,505,136 | 4 | 1 | 5 | 0 |
| Case 97 | 20 | 20,506,955 | 21,013,756 | 5 | 1 | 6 | 0 |
| Case 97 | 20 | 21,017,279 | 21,213,397 | 4 | 1 | 5 | 0 |
| Case 97 | 20 | 21,213,844 | 23,246,833 | 5 | 1 | 6 | 0 |
| Case 97 | 20 | 23,248,866 | 23,501,350 | 4 | 1 | 5 | 0 |
| Case 97 | 20 | 23,503,299 | 23,775,819 | 5 | 1 | 6 | 0 |
| Case 97 | 20 | 23,778,522 | 24,528,618 | 4 | 1 | 5 | 0 |
| Case 97 | 20 | 24,530,151 | 24,944,454 | 5 | 1 | 6 | 0 |
| Case 97 | 20 | 24,944,483 | 25,666,278 | 4 | 1 | 5 | 0 |
| Case 97 | 20 | 25,666,286 | 26,247,606 | 5 | 1 | 6 | 0 |
| Case 97 | 20 | 26,278,250 | 26,293,985 | 4 | 1 | 5 | 0 |
| Case 97 | 20 | 29,425,357 | 59,125,742 | 4 | 1 | 5 | 0 |
| Case 97 | 20 | 59,129,488 | 59,129,488 | 3 | 1 | 4 | 0 |
| Case 97 | 20 | 59,134,655 | 59,522,262 | 4 | 2 | 6 | 0 |
| Case 97 | 20 | 59,523,840 | 62,948,788 | 3 | 2 | 5 | 0 |
| Case 97 | 21 | 10,827,533 | 10,971,337 | 2 | 1 | 3 | 0 |
| Case 97 | 21 | 14,368,320 | 48,100,155 | 2 | 1 | 3 | 0 |
| Case 97 | 22 | 16,114,244 | 22,770,917 | 3 | 0 | 3 | 1 |
| Case 97 | 22 | 22,774,512 | 23,272,656 | 4 | 0 | 4 | 1 |
| Case 97 | 22 | 23,276,219 | 26,431,988 | 3 | 0 | 3 | 1 |
| Case 97 | 22 | 26,432,820 | 26,662,042 | 4 | 0 | 4 | 1 |
| Case 97 | 22 | 26,665,099 | 27,292,868 | 3 | 0 | 3 | 1 |
| Case 97 | 22 | 27,295,234 | 27,701,317 | 4 | 0 | 4 | 1 |
| Case 97 | 22 | 27,708,313 | 27,779,272 | 3 | 0 | 3 | 1 |
| Case 97 | 22 | 27,781,570 | 27,985,660 | 4 | 0 | 4 | 1 |
| Case 97 | 22 | 27,988,228 | 28,378,810 | 3 | 0 | 3 | 1 |
| Case 97 | 22 | 28,379,120 | 28,919,200 | 4 | 0 | 4 | 1 |
| Case 97 | 22 | 28,923,317 | 33,224,779 | 3 | 0 | 3 | 1 |
| Case 97 | 22 | 33,228,070 | 33,473,566 | 4 | 0 | 4 | 1 |
| Case 97 | 22 | 33,479,580 | 35,817,553 | 3 | 0 | 3 | 1 |
| Case 97 | 22 | 35,817,597 | 36,055,507 | 4 | 0 | 4 | 1 |

|         |    |            |            |   |   |   |   |
|---------|----|------------|------------|---|---|---|---|
| Case 97 | 22 | 36,056,728 | 36,900,186 | 3 | 0 | 3 | 1 |
| Case 97 | 22 | 36,900,230 | 37,289,869 | 4 | 0 | 4 | 1 |
| Case 97 | 22 | 37,293,567 | 42,606,078 | 3 | 0 | 3 | 1 |
| Case 97 | 22 | 42,606,642 | 42,771,226 | 4 | 0 | 4 | 1 |
| Case 97 | 22 | 42,773,732 | 43,642,153 | 3 | 0 | 3 | 1 |
| Case 97 | 22 | 43,645,133 | 43,716,324 | 4 | 0 | 4 | 1 |
| Case 97 | 22 | 43,716,971 | 44,814,793 | 3 | 0 | 3 | 1 |
| Case 97 | 22 | 44,815,721 | 45,007,348 | 4 | 0 | 4 | 1 |
| Case 97 | 22 | 45,007,468 | 47,189,678 | 3 | 0 | 3 | 1 |
| Case 97 | 22 | 47,191,699 | 47,846,204 | 4 | 0 | 4 | 1 |
| Case 97 | 22 | 47,848,898 | 48,199,728 | 3 | 0 | 3 | 1 |
| Case 97 | 22 | 48,200,547 | 48,284,514 | 4 | 0 | 4 | 1 |
| Case 97 | 22 | 48,284,888 | 49,784,591 | 3 | 0 | 3 | 1 |
| Case 97 | 22 | 49,784,667 | 50,117,191 | 4 | 0 | 4 | 1 |
| Case 97 | 22 | 50,118,723 | 51,066,194 | 3 | 0 | 3 | 1 |
| Case 97 | 22 | 51,066,921 | 51,195,728 | 4 | 0 | 4 | 1 |
| Case 98 | 1  | 82,154     | 880,502    | 1 | 1 | 2 | 0 |
| Case 98 | 1  | 880,922    | 1,026,913  | 2 | 0 | 2 | 1 |
| Case 98 | 1  | 1,030,565  | 1,110,019  | 1 | 1 | 2 | 0 |
| Case 98 | 1  | 1,110,586  | 1,226,904  | 2 | 0 | 2 | 1 |
| Case 98 | 1  | 1,226,912  | 2,492,123  | 1 | 1 | 2 | 0 |
| Case 98 | 1  | 2,493,158  | 2,849,190  | 2 | 0 | 2 | 1 |
| Case 98 | 1  | 2,850,181  | 3,592,436  | 1 | 1 | 2 | 0 |
| Case 98 | 1  | 3,597,017  | 3,996,946  | 2 | 0 | 2 | 1 |
| Case 98 | 1  | 4,002,498  | 4,748,305  | 1 | 1 | 2 | 0 |
| Case 98 | 1  | 4,751,030  | 4,824,311  | 2 | 0 | 2 | 1 |
| Case 98 | 1  | 4,828,063  | 7,995,090  | 1 | 1 | 2 | 0 |
| Case 98 | 1  | 7,995,111  | 8,168,564  | 2 | 0 | 2 | 1 |
| Case 98 | 1  | 8,177,028  | 12,779,547 | 1 | 1 | 2 | 0 |
| Case 98 | 1  | 12,779,560 | 12,868,237 | 2 | 0 | 2 | 1 |
| Case 98 | 1  | 12,871,327 | 16,073,432 | 1 | 1 | 2 | 0 |
| Case 98 | 1  | 16,073,524 | 16,377,042 | 2 | 0 | 2 | 1 |
| Case 98 | 1  | 16,378,215 | 16,748,900 | 1 | 1 | 2 | 0 |
| Case 98 | 1  | 16,759,616 | 17,420,231 | 2 | 0 | 2 | 1 |
| Case 98 | 1  | 17,422,451 | 19,124,368 | 1 | 1 | 2 | 0 |
| Case 98 | 1  | 19,130,827 | 19,202,507 | 2 | 0 | 2 | 1 |
| Case 98 | 1  | 19,202,886 | 19,284,564 | 1 | 1 | 2 | 0 |
| Case 98 | 1  | 19,291,757 | 19,775,113 | 2 | 0 | 2 | 1 |
| Case 98 | 1  | 19,775,375 | 34,727,990 | 1 | 1 | 2 | 0 |
| Case 98 | 1  | 34,729,463 | 34,992,037 | 2 | 0 | 2 | 1 |
| Case 98 | 1  | 34,995,974 | 42,390,317 | 1 | 1 | 2 | 0 |
| Case 98 | 1  | 42,397,435 | 42,702,344 | 2 | 0 | 2 | 1 |
| Case 98 | 1  | 42,727,950 | 45,288,818 | 1 | 1 | 2 | 0 |
| Case 98 | 1  | 45,288,983 | 45,716,285 | 2 | 0 | 2 | 1 |
| Case 98 | 1  | 45,740,469 | 47,264,495 | 1 | 1 | 2 | 0 |
| Case 98 | 1  | 47,264,724 | 47,650,744 | 2 | 0 | 2 | 1 |
| Case 98 | 1  | 47,650,768 | 48,570,133 | 1 | 1 | 2 | 0 |
| Case 98 | 1  | 48,570,466 | 48,709,019 | 2 | 0 | 2 | 1 |
| Case 98 | 1  | 48,713,394 | 62,646,182 | 1 | 1 | 2 | 0 |
| Case 98 | 1  | 62,657,530 | 62,716,575 | 2 | 0 | 2 | 1 |
| Case 98 | 1  | 62,717,759 | 69,829,687 | 1 | 1 | 2 | 0 |
| Case 98 | 1  | 69,830,063 | 70,504,985 | 2 | 0 | 2 | 1 |
| Case 98 | 1  | 70,505,051 | 71,321,740 | 1 | 1 | 2 | 0 |
| Case 98 | 1  | 71,325,044 | 71,367,464 | 2 | 0 | 2 | 1 |
| Case 98 | 1  | 71,368,281 | 75,779,988 | 1 | 1 | 2 | 0 |
| Case 98 | 1  | 75,780,028 | 76,535,434 | 2 | 0 | 2 | 1 |
| Case 98 | 1  | 76,536,649 | 79,350,364 | 1 | 1 | 2 | 0 |
| Case 98 | 1  | 79,353,399 | 79,491,206 | 2 | 0 | 2 | 1 |
| Case 98 | 1  | 79,493,936 | 84,190,263 | 1 | 1 | 2 | 0 |
| Case 98 | 1  | 84,196,920 | 84,743,949 | 2 | 0 | 2 | 1 |
| Case 98 | 1  | 84,744,277 | 90,659,140 | 1 | 1 | 2 | 0 |

|         |   |             |             |   |   |   |   |
|---------|---|-------------|-------------|---|---|---|---|
| Case 98 | 1 | 90,659,565  | 90,901,199  | 2 | 0 | 2 | 1 |
| Case 98 | 1 | 90,906,982  | 94,172,121  | 1 | 1 | 2 | 0 |
| Case 98 | 1 | 94,175,909  | 94,468,808  | 2 | 0 | 2 | 1 |
| Case 98 | 1 | 94,469,631  | 97,100,867  | 1 | 1 | 2 | 0 |
| Case 98 | 1 | 97,100,996  | 97,724,226  | 2 | 0 | 2 | 1 |
| Case 98 | 1 | 97,725,679  | 103,405,892 | 1 | 1 | 2 | 0 |
| Case 98 | 1 | 103,407,168 | 103,750,676 | 2 | 0 | 2 | 1 |
| Case 98 | 1 | 103,754,317 | 111,739,856 | 1 | 1 | 2 | 0 |
| Case 98 | 1 | 111,740,585 | 111,861,974 | 2 | 0 | 2 | 1 |
| Case 98 | 1 | 111,861,982 | 114,653,675 | 1 | 1 | 2 | 0 |
| Case 98 | 1 | 114,655,222 | 114,837,975 | 2 | 0 | 2 | 1 |
| Case 98 | 1 | 114,853,645 | 118,189,080 | 1 | 1 | 2 | 0 |
| Case 98 | 1 | 118,189,519 | 118,816,729 | 2 | 0 | 2 | 1 |
| Case 98 | 1 | 118,817,482 | 119,016,240 | 1 | 1 | 2 | 0 |
| Case 98 | 1 | 119,023,640 | 119,383,818 | 2 | 0 | 2 | 1 |
| Case 98 | 1 | 119,392,083 | 121,346,616 | 1 | 1 | 2 | 0 |
| Case 98 | 1 | 142,649,718 | 150,527,953 | 1 | 1 | 2 | 0 |
| Case 98 | 1 | 150,528,675 | 150,970,680 | 2 | 0 | 2 | 1 |
| Case 98 | 1 | 150,971,879 | 151,028,154 | 1 | 1 | 2 | 0 |
| Case 98 | 1 | 151,031,667 | 151,509,754 | 2 | 0 | 2 | 1 |
| Case 98 | 1 | 151,510,825 | 156,235,857 | 1 | 1 | 2 | 0 |
| Case 98 | 1 | 156,236,155 | 156,347,121 | 2 | 0 | 2 | 1 |
| Case 98 | 1 | 156,347,131 | 156,834,169 | 1 | 1 | 2 | 0 |
| Case 98 | 1 | 156,834,187 | 157,484,698 | 2 | 0 | 2 | 1 |
| Case 98 | 1 | 157,485,429 | 160,063,065 | 1 | 1 | 2 | 0 |
| Case 98 | 1 | 160,063,083 | 160,123,556 | 2 | 0 | 2 | 1 |
| Case 98 | 1 | 160,124,866 | 160,703,965 | 1 | 1 | 2 | 0 |
| Case 98 | 1 | 160,705,619 | 160,864,921 | 2 | 0 | 2 | 1 |
| Case 98 | 1 | 160,876,923 | 161,478,708 | 1 | 1 | 2 | 0 |
| Case 98 | 1 | 161,479,599 | 161,943,634 | 2 | 0 | 2 | 1 |
| Case 98 | 1 | 161,946,727 | 167,503,778 | 1 | 1 | 2 | 0 |
| Case 98 | 1 | 167,507,857 | 167,547,219 | 2 | 0 | 2 | 1 |
| Case 98 | 1 | 167,549,747 | 168,460,113 | 1 | 1 | 2 | 0 |
| Case 98 | 1 | 168,460,487 | 168,635,004 | 2 | 0 | 2 | 1 |
| Case 98 | 1 | 168,647,094 | 170,927,615 | 1 | 1 | 2 | 0 |
| Case 98 | 1 | 170,928,652 | 171,224,048 | 2 | 0 | 2 | 1 |
| Case 98 | 1 | 171,224,083 | 171,364,141 | 1 | 1 | 2 | 0 |
| Case 98 | 1 | 171,371,998 | 171,788,782 | 2 | 0 | 2 | 1 |
| Case 98 | 1 | 171,791,211 | 173,277,164 | 1 | 1 | 2 | 0 |
| Case 98 | 1 | 173,278,169 | 174,985,856 | 2 | 0 | 2 | 1 |
| Case 98 | 1 | 174,987,637 | 176,118,219 | 1 | 1 | 2 | 0 |
| Case 98 | 1 | 176,122,170 | 176,915,101 | 2 | 0 | 2 | 1 |
| Case 98 | 1 | 176,915,156 | 177,363,013 | 1 | 1 | 2 | 0 |
| Case 98 | 1 | 177,376,746 | 177,752,701 | 2 | 0 | 2 | 1 |
| Case 98 | 1 | 177,755,464 | 196,281,802 | 1 | 1 | 2 | 0 |
| Case 98 | 1 | 196,295,914 | 196,677,945 | 2 | 0 | 2 | 1 |
| Case 98 | 1 | 196,679,455 | 199,263,161 | 1 | 1 | 2 | 0 |
| Case 98 | 1 | 199,265,270 | 199,598,783 | 2 | 0 | 2 | 1 |
| Case 98 | 1 | 199,608,286 | 204,734,495 | 1 | 1 | 2 | 0 |
| Case 98 | 1 | 204,735,453 | 205,274,675 | 2 | 0 | 2 | 1 |
| Case 98 | 1 | 205,275,207 | 209,242,897 | 1 | 1 | 2 | 0 |
| Case 98 | 1 | 209,244,138 | 209,489,688 | 2 | 0 | 2 | 1 |
| Case 98 | 1 | 209,497,471 | 211,776,074 | 1 | 1 | 2 | 0 |
| Case 98 | 1 | 211,776,105 | 212,332,294 | 2 | 0 | 2 | 1 |
| Case 98 | 1 | 212,332,338 | 217,272,170 | 1 | 1 | 2 | 0 |
| Case 98 | 1 | 217,272,629 | 217,548,036 | 2 | 0 | 2 | 1 |
| Case 98 | 1 | 217,549,909 | 219,619,538 | 1 | 1 | 2 | 0 |
| Case 98 | 1 | 219,622,596 | 219,723,599 | 2 | 0 | 2 | 1 |
| Case 98 | 1 | 219,724,937 | 223,828,623 | 1 | 1 | 2 | 0 |
| Case 98 | 1 | 223,828,777 | 224,076,114 | 2 | 0 | 2 | 1 |
| Case 98 | 1 | 224,156,739 | 225,955,919 | 1 | 1 | 2 | 0 |



|         |   |             |             |   |   |   |   |
|---------|---|-------------|-------------|---|---|---|---|
| Case 98 | 1 | 225,958,857 | 226,110,014 | 2 | 0 | 2 | 1 |
| Case 98 | 1 | 226,110,029 | 227,354,535 | 1 | 1 | 2 | 0 |
| Case 98 | 1 | 227,356,925 | 227,514,908 | 2 | 0 | 2 | 1 |
| Case 98 | 1 | 227,517,737 | 227,703,397 | 1 | 1 | 2 | 0 |
| Case 98 | 1 | 227,707,618 | 228,043,496 | 2 | 0 | 2 | 1 |
| Case 98 | 1 | 228,045,508 | 231,036,505 | 1 | 1 | 2 | 0 |
| Case 98 | 1 | 231,041,558 | 231,211,408 | 2 | 0 | 2 | 1 |
| Case 98 | 1 | 231,214,726 | 232,443,051 | 1 | 1 | 2 | 0 |
| Case 98 | 1 | 232,447,391 | 232,736,520 | 2 | 0 | 2 | 1 |
| Case 98 | 1 | 232,744,422 | 234,663,633 | 1 | 1 | 2 | 0 |
| Case 98 | 1 | 234,664,631 | 234,846,396 | 2 | 0 | 2 | 1 |
| Case 98 | 1 | 234,850,303 | 236,716,934 | 1 | 1 | 2 | 0 |
| Case 98 | 1 | 236,716,959 | 236,772,113 | 2 | 0 | 2 | 1 |
| Case 98 | 1 | 236,772,416 | 247,715,687 | 1 | 1 | 2 | 0 |
| Case 98 | 1 | 247,715,998 | 247,921,083 | 2 | 0 | 2 | 1 |
| Case 98 | 1 | 247,921,108 | 249,218,992 | 1 | 1 | 2 | 0 |
| Case 98 | 2 | 18,674      | 3,357,930   | 1 | 1 | 2 | 0 |
| Case 98 | 2 | 3,360,352   | 3,645,429   | 2 | 0 | 2 | 1 |
| Case 98 | 2 | 3,647,117   | 6,991,671   | 1 | 1 | 2 | 0 |
| Case 98 | 2 | 6,991,759   | 7,301,432   | 2 | 0 | 2 | 1 |
| Case 98 | 2 | 7,302,999   | 23,913,985  | 1 | 1 | 2 | 0 |
| Case 98 | 2 | 23,914,544  | 24,521,766  | 2 | 0 | 2 | 1 |
| Case 98 | 2 | 24,522,800  | 24,692,809  | 1 | 1 | 2 | 0 |
| Case 98 | 2 | 24,702,158  | 25,138,987  | 2 | 0 | 2 | 1 |
| Case 98 | 2 | 25,141,238  | 28,812,285  | 1 | 1 | 2 | 0 |
| Case 98 | 2 | 28,812,569  | 29,135,572  | 2 | 0 | 2 | 1 |
| Case 98 | 2 | 29,138,009  | 32,897,055  | 1 | 1 | 2 | 0 |
| Case 98 | 2 | 32,897,147  | 33,057,541  | 2 | 0 | 2 | 1 |
| Case 98 | 2 | 33,062,281  | 33,474,645  | 1 | 1 | 2 | 0 |
| Case 98 | 2 | 33,474,713  | 33,722,854  | 2 | 0 | 2 | 1 |
| Case 98 | 2 | 33,723,184  | 33,783,393  | 1 | 1 | 2 | 0 |
| Case 98 | 2 | 33,784,161  | 34,019,809  | 2 | 0 | 2 | 1 |
| Case 98 | 2 | 34,021,004  | 34,933,685  | 1 | 1 | 2 | 0 |
| Case 98 | 2 | 34,934,503  | 35,127,980  | 2 | 0 | 2 | 1 |
| Case 98 | 2 | 35,128,057  | 35,191,207  | 1 | 1 | 2 | 0 |
| Case 98 | 2 | 35,191,585  | 35,575,340  | 2 | 0 | 2 | 1 |
| Case 98 | 2 | 35,575,973  | 35,644,367  | 1 | 1 | 2 | 0 |
| Case 98 | 2 | 35,647,806  | 35,846,522  | 2 | 0 | 2 | 1 |
| Case 98 | 2 | 35,848,903  | 38,126,134  | 1 | 1 | 2 | 0 |
| Case 98 | 2 | 38,139,081  | 38,261,124  | 2 | 0 | 2 | 1 |
| Case 98 | 2 | 38,261,143  | 38,306,415  | 1 | 1 | 2 | 0 |
| Case 98 | 2 | 38,306,454  | 38,536,558  | 2 | 0 | 2 | 1 |
| Case 98 | 2 | 38,536,626  | 38,675,963  | 1 | 1 | 2 | 0 |
| Case 98 | 2 | 38,677,471  | 38,883,974  | 2 | 0 | 2 | 1 |
| Case 98 | 2 | 38,893,338  | 39,555,944  | 1 | 1 | 2 | 0 |
| Case 98 | 2 | 39,559,844  | 39,626,388  | 2 | 0 | 2 | 1 |
| Case 98 | 2 | 39,636,469  | 51,770,069  | 1 | 1 | 2 | 0 |
| Case 98 | 2 | 51,770,480  | 51,948,352  | 2 | 0 | 2 | 1 |
| Case 98 | 2 | 51,951,101  | 54,755,229  | 1 | 1 | 2 | 0 |
| Case 98 | 2 | 54,760,038  | 54,886,347  | 2 | 0 | 2 | 1 |
| Case 98 | 2 | 54,886,361  | 55,183,627  | 1 | 1 | 2 | 0 |
| Case 98 | 2 | 55,185,013  | 55,513,662  | 2 | 0 | 2 | 1 |
| Case 98 | 2 | 55,514,668  | 56,627,550  | 1 | 1 | 2 | 0 |
| Case 98 | 2 | 56,634,019  | 57,050,007  | 2 | 0 | 2 | 1 |
| Case 98 | 2 | 57,050,778  | 57,365,335  | 1 | 1 | 2 | 0 |
| Case 98 | 2 | 57,365,499  | 57,739,441  | 2 | 0 | 2 | 1 |
| Case 98 | 2 | 57,742,834  | 62,715,566  | 1 | 1 | 2 | 0 |
| Case 98 | 2 | 62,719,582  | 64,349,202  | 2 | 0 | 2 | 1 |
| Case 98 | 2 | 64,355,833  | 69,034,157  | 1 | 1 | 2 | 0 |
| Case 98 | 2 | 69,034,515  | 69,098,972  | 2 | 0 | 2 | 1 |
| Case 98 | 2 | 69,101,053  | 76,193,226  | 1 | 1 | 2 | 0 |

|         |   |             |             |   |   |   |   |
|---------|---|-------------|-------------|---|---|---|---|
| Case 98 | 2 | 76,206,795  | 76,618,512  | 2 | 0 | 2 | 1 |
| Case 98 | 2 | 76,618,920  | 77,021,928  | 1 | 1 | 2 | 0 |
| Case 98 | 2 | 77,029,323  | 77,259,215  | 2 | 0 | 2 | 1 |
| Case 98 | 2 | 77,260,044  | 83,129,299  | 1 | 1 | 2 | 0 |
| Case 98 | 2 | 83,134,337  | 83,383,702  | 2 | 0 | 2 | 1 |
| Case 98 | 2 | 83,386,258  | 88,744,777  | 1 | 1 | 2 | 0 |
| Case 98 | 2 | 88,747,766  | 92,081,640  | 2 | 0 | 2 | 1 |
| Case 98 | 2 | 95,429,424  | 95,440,352  | 2 | 0 | 2 | 1 |
| Case 98 | 2 | 95,444,917  | 97,198,800  | 1 | 1 | 2 | 0 |
| Case 98 | 2 | 97,199,694  | 98,351,118  | 2 | 0 | 2 | 1 |
| Case 98 | 2 | 98,351,912  | 99,363,790  | 1 | 1 | 2 | 0 |
| Case 98 | 2 | 99,363,908  | 100,396,539 | 2 | 0 | 2 | 1 |
| Case 98 | 2 | 100,405,753 | 100,464,011 | 1 | 1 | 2 | 0 |
| Case 98 | 2 | 100,464,187 | 100,623,404 | 2 | 0 | 2 | 1 |
| Case 98 | 2 | 100,624,052 | 100,759,810 | 1 | 1 | 2 | 0 |
| Case 98 | 2 | 100,763,006 | 101,186,041 | 2 | 0 | 2 | 1 |
| Case 98 | 2 | 101,186,138 | 102,939,036 | 1 | 1 | 2 | 0 |
| Case 98 | 2 | 102,948,181 | 103,281,417 | 2 | 0 | 2 | 1 |
| Case 98 | 2 | 103,281,610 | 108,626,811 | 1 | 1 | 2 | 0 |
| Case 98 | 2 | 108,626,880 | 109,513,673 | 2 | 0 | 2 | 1 |
| Case 98 | 2 | 109,522,772 | 110,852,875 | 1 | 1 | 2 | 0 |
| Case 98 | 2 | 110,859,672 | 111,392,259 | 2 | 1 | 3 | 0 |
| Case 98 | 2 | 111,395,603 | 116,781,809 | 1 | 1 | 2 | 0 |
| Case 98 | 2 | 116,790,291 | 117,132,173 | 2 | 0 | 2 | 1 |
| Case 98 | 2 | 117,132,704 | 118,374,375 | 1 | 1 | 2 | 0 |
| Case 98 | 2 | 118,376,620 | 118,639,481 | 2 | 0 | 2 | 1 |
| Case 98 | 2 | 118,646,201 | 119,827,462 | 1 | 1 | 2 | 0 |
| Case 98 | 2 | 119,827,616 | 120,165,021 | 2 | 0 | 2 | 1 |
| Case 98 | 2 | 120,176,240 | 124,437,197 | 1 | 1 | 2 | 0 |
| Case 98 | 2 | 124,454,519 | 124,929,266 | 2 | 0 | 2 | 1 |
| Case 98 | 2 | 124,929,288 | 126,338,255 | 1 | 1 | 2 | 0 |
| Case 98 | 2 | 126,346,332 | 127,340,075 | 2 | 0 | 2 | 1 |
| Case 98 | 2 | 127,342,981 | 127,896,023 | 1 | 1 | 2 | 0 |
| Case 98 | 2 | 127,896,232 | 128,641,031 | 2 | 0 | 2 | 1 |
| Case 98 | 2 | 128,645,618 | 129,772,622 | 1 | 1 | 2 | 0 |
| Case 98 | 2 | 129,773,278 | 130,048,509 | 2 | 0 | 2 | 1 |
| Case 98 | 2 | 130,051,445 | 131,744,854 | 1 | 1 | 2 | 0 |
| Case 98 | 2 | 131,754,308 | 132,648,102 | 2 | 0 | 2 | 1 |
| Case 98 | 2 | 132,649,834 | 134,985,235 | 1 | 1 | 2 | 0 |
| Case 98 | 2 | 134,985,914 | 135,206,338 | 2 | 0 | 2 | 1 |
| Case 98 | 2 | 135,206,614 | 140,473,877 | 1 | 1 | 2 | 0 |
| Case 98 | 2 | 140,480,824 | 140,858,451 | 2 | 0 | 2 | 1 |
| Case 98 | 2 | 140,868,186 | 144,704,689 | 1 | 1 | 2 | 0 |
| Case 98 | 2 | 144,710,342 | 145,058,077 | 2 | 0 | 2 | 1 |
| Case 98 | 2 | 145,079,065 | 146,632,625 | 1 | 1 | 2 | 0 |
| Case 98 | 2 | 146,639,739 | 147,193,915 | 2 | 0 | 2 | 1 |
| Case 98 | 2 | 147,219,964 | 152,534,514 | 1 | 1 | 2 | 0 |
| Case 98 | 2 | 152,534,541 | 152,670,590 | 2 | 0 | 2 | 1 |
| Case 98 | 2 | 152,670,703 | 155,070,567 | 1 | 1 | 2 | 0 |
| Case 98 | 2 | 155,072,003 | 155,295,173 | 2 | 0 | 2 | 1 |
| Case 98 | 2 | 155,295,203 | 158,902,989 | 1 | 1 | 2 | 0 |
| Case 98 | 2 | 158,903,284 | 159,412,448 | 2 | 0 | 2 | 1 |
| Case 98 | 2 | 159,414,979 | 169,681,199 | 1 | 1 | 2 | 0 |
| Case 98 | 2 | 169,683,061 | 169,818,035 | 2 | 0 | 2 | 1 |
| Case 98 | 2 | 169,818,302 | 177,962,141 | 1 | 1 | 2 | 0 |
| Case 98 | 2 | 177,968,372 | 178,600,616 | 2 | 0 | 2 | 1 |
| Case 98 | 2 | 178,607,359 | 179,284,012 | 1 | 1 | 2 | 0 |
| Case 98 | 2 | 179,287,834 | 179,693,338 | 2 | 0 | 2 | 1 |
| Case 98 | 2 | 179,693,775 | 181,971,800 | 1 | 1 | 2 | 0 |
| Case 98 | 2 | 181,980,885 | 182,352,791 | 2 | 0 | 2 | 1 |
| Case 98 | 2 | 182,358,882 | 183,411,197 | 1 | 1 | 2 | 0 |

|         |   |             |             |   |   |   |   |
|---------|---|-------------|-------------|---|---|---|---|
| Case 98 | 2 | 183,416,697 | 184,164,557 | 2 | 0 | 2 | 1 |
| Case 98 | 2 | 184,170,353 | 186,790,478 | 1 | 1 | 2 | 0 |
| Case 98 | 2 | 186,801,246 | 188,435,643 | 2 | 0 | 2 | 1 |
| Case 98 | 2 | 188,450,136 | 190,058,461 | 1 | 1 | 2 | 0 |
| Case 98 | 2 | 190,073,366 | 190,503,961 | 2 | 0 | 2 | 1 |
| Case 98 | 2 | 190,515,247 | 201,102,905 | 1 | 1 | 2 | 0 |
| Case 98 | 2 | 201,108,594 | 201,562,553 | 2 | 0 | 2 | 1 |
| Case 98 | 2 | 201,567,968 | 212,847,371 | 1 | 1 | 2 | 0 |
| Case 98 | 2 | 212,852,895 | 213,404,389 | 2 | 0 | 2 | 1 |
| Case 98 | 2 | 213,413,231 | 214,049,210 | 1 | 1 | 2 | 0 |
| Case 98 | 2 | 214,050,607 | 214,829,765 | 2 | 0 | 2 | 1 |
| Case 98 | 2 | 214,832,161 | 217,856,142 | 1 | 1 | 2 | 0 |
| Case 98 | 2 | 217,856,192 | 217,944,627 | 2 | 0 | 2 | 1 |
| Case 98 | 2 | 217,947,644 | 219,251,437 | 1 | 1 | 2 | 0 |
| Case 98 | 2 | 219,251,920 | 219,676,241 | 2 | 0 | 2 | 1 |
| Case 98 | 2 | 219,676,989 | 223,504,326 | 1 | 1 | 2 | 0 |
| Case 98 | 2 | 223,504,374 | 223,959,874 | 2 | 0 | 2 | 1 |
| Case 98 | 2 | 223,960,235 | 227,660,462 | 1 | 1 | 2 | 0 |
| Case 98 | 2 | 227,660,544 | 227,915,924 | 2 | 0 | 2 | 1 |
| Case 98 | 2 | 227,917,090 | 231,553,094 | 1 | 1 | 2 | 0 |
| Case 98 | 2 | 231,555,684 | 231,738,163 | 2 | 0 | 2 | 1 |
| Case 98 | 2 | 231,738,168 | 231,877,207 | 1 | 1 | 2 | 0 |
| Case 98 | 2 | 231,878,834 | 232,171,968 | 2 | 0 | 2 | 1 |
| Case 98 | 2 | 232,176,541 | 232,393,323 | 1 | 1 | 2 | 0 |
| Case 98 | 2 | 232,393,328 | 233,208,988 | 2 | 0 | 2 | 1 |
| Case 98 | 2 | 233,211,861 | 234,482,610 | 1 | 1 | 2 | 0 |
| Case 98 | 2 | 234,493,048 | 234,676,872 | 2 | 0 | 2 | 1 |
| Case 98 | 2 | 234,676,937 | 234,707,921 | 1 | 1 | 2 | 0 |
| Case 98 | 2 | 234,708,152 | 234,908,496 | 2 | 0 | 2 | 1 |
| Case 98 | 2 | 234,909,799 | 238,296,807 | 1 | 1 | 2 | 0 |
| Case 98 | 2 | 238,301,184 | 238,462,725 | 2 | 0 | 2 | 1 |
| Case 98 | 2 | 238,467,914 | 238,863,455 | 1 | 1 | 2 | 0 |
| Case 98 | 2 | 238,867,059 | 239,040,093 | 2 | 0 | 2 | 1 |
| Case 98 | 2 | 239,040,107 | 243,048,760 | 1 | 1 | 2 | 0 |
| Case 98 | 3 | 61,495      | 1,330,775   | 1 | 1 | 2 | 0 |
| Case 98 | 3 | 1,331,135   | 1,506,235   | 2 | 0 | 2 | 1 |
| Case 98 | 3 | 1,507,454   | 5,265,143   | 1 | 1 | 2 | 0 |
| Case 98 | 3 | 5,267,251   | 5,434,345   | 2 | 0 | 2 | 1 |
| Case 98 | 3 | 5,434,964   | 12,068,485  | 1 | 1 | 2 | 0 |
| Case 98 | 3 | 12,075,218  | 12,468,690  | 2 | 0 | 2 | 1 |
| Case 98 | 3 | 12,469,667  | 32,398,234  | 1 | 1 | 2 | 0 |
| Case 98 | 3 | 32,398,914  | 32,463,994  | 2 | 0 | 2 | 1 |
| Case 98 | 3 | 32,465,430  | 37,048,495  | 1 | 1 | 2 | 0 |
| Case 98 | 3 | 37,050,325  | 37,536,043  | 2 | 0 | 2 | 1 |
| Case 98 | 3 | 37,536,056  | 47,033,125  | 1 | 1 | 2 | 0 |
| Case 98 | 3 | 47,036,565  | 50,395,827  | 2 | 0 | 2 | 1 |
| Case 98 | 3 | 50,395,926  | 52,440,269  | 1 | 1 | 2 | 0 |
| Case 98 | 3 | 52,446,788  | 53,155,158  | 2 | 0 | 2 | 1 |
| Case 98 | 3 | 53,155,720  | 54,886,083  | 1 | 1 | 2 | 0 |
| Case 98 | 3 | 54,889,044  | 54,999,412  | 2 | 0 | 2 | 1 |
| Case 98 | 3 | 55,002,066  | 77,394,540  | 1 | 1 | 2 | 0 |
| Case 98 | 3 | 77,402,615  | 77,742,421  | 2 | 0 | 2 | 1 |
| Case 98 | 3 | 77,742,551  | 81,498,737  | 1 | 1 | 2 | 0 |
| Case 98 | 3 | 81,502,116  | 81,985,189  | 2 | 0 | 2 | 1 |
| Case 98 | 3 | 81,987,410  | 83,004,185  | 1 | 1 | 2 | 0 |
| Case 98 | 3 | 83,009,526  | 84,993,411  | 2 | 0 | 2 | 1 |
| Case 98 | 3 | 84,995,062  | 85,362,101  | 1 | 1 | 2 | 0 |
| Case 98 | 3 | 85,362,180  | 86,239,049  | 2 | 0 | 2 | 1 |
| Case 98 | 3 | 86,242,930  | 90,442,925  | 1 | 1 | 2 | 0 |
| Case 98 | 3 | 93,537,290  | 98,512,576  | 1 | 1 | 2 | 0 |
| Case 98 | 3 | 98,514,292  | 99,184,544  | 2 | 0 | 2 | 1 |

|         |   |             |             |   |   |   |   |
|---------|---|-------------|-------------|---|---|---|---|
| Case 98 | 3 | 99,189,574  | 100,871,443 | 1 | 1 | 2 | 0 |
| Case 98 | 3 | 100,872,536 | 101,384,430 | 2 | 0 | 2 | 1 |
| Case 98 | 3 | 101,390,043 | 101,834,050 | 1 | 1 | 2 | 0 |
| Case 98 | 3 | 101,835,194 | 102,651,365 | 2 | 0 | 2 | 1 |
| Case 98 | 3 | 102,673,948 | 105,846,933 | 1 | 1 | 2 | 0 |
| Case 98 | 3 | 105,847,367 | 106,156,027 | 2 | 0 | 2 | 1 |
| Case 98 | 3 | 106,159,948 | 113,847,689 | 1 | 1 | 2 | 0 |
| Case 98 | 3 | 113,850,123 | 113,933,204 | 2 | 0 | 2 | 1 |
| Case 98 | 3 | 113,935,873 | 114,237,033 | 1 | 1 | 2 | 0 |
| Case 98 | 3 | 114,237,183 | 115,200,732 | 2 | 0 | 2 | 1 |
| Case 98 | 3 | 115,205,520 | 115,856,130 | 1 | 1 | 2 | 0 |
| Case 98 | 3 | 115,864,422 | 116,311,891 | 2 | 0 | 2 | 1 |
| Case 98 | 3 | 116,315,423 | 118,587,348 | 1 | 1 | 2 | 0 |
| Case 98 | 3 | 118,588,401 | 118,865,806 | 2 | 0 | 2 | 1 |
| Case 98 | 3 | 118,865,815 | 122,328,753 | 1 | 1 | 2 | 0 |
| Case 98 | 3 | 122,329,380 | 122,667,353 | 2 | 0 | 2 | 1 |
| Case 98 | 3 | 122,667,454 | 126,105,301 | 1 | 1 | 2 | 0 |
| Case 98 | 3 | 126,109,485 | 127,079,760 | 2 | 0 | 2 | 1 |
| Case 98 | 3 | 127,080,468 | 128,311,781 | 1 | 1 | 2 | 0 |
| Case 98 | 3 | 128,313,880 | 129,020,778 | 2 | 0 | 2 | 1 |
| Case 98 | 3 | 129,023,630 | 129,939,787 | 1 | 1 | 2 | 0 |
| Case 98 | 3 | 129,942,136 | 130,239,724 | 2 | 0 | 2 | 1 |
| Case 98 | 3 | 130,243,249 | 131,756,349 | 1 | 1 | 2 | 0 |
| Case 98 | 3 | 131,758,077 | 132,036,310 | 2 | 0 | 2 | 1 |
| Case 98 | 3 | 132,036,382 | 133,468,829 | 1 | 1 | 2 | 0 |
| Case 98 | 3 | 133,472,449 | 133,558,698 | 2 | 0 | 2 | 1 |
| Case 98 | 3 | 133,561,095 | 134,669,241 | 1 | 1 | 2 | 0 |
| Case 98 | 3 | 134,670,252 | 135,046,768 | 2 | 0 | 2 | 1 |
| Case 98 | 3 | 135,049,624 | 138,848,435 | 1 | 1 | 2 | 0 |
| Case 98 | 3 | 138,848,899 | 139,212,730 | 2 | 0 | 2 | 1 |
| Case 98 | 3 | 139,217,951 | 139,555,222 | 1 | 1 | 2 | 0 |
| Case 98 | 3 | 139,557,919 | 139,766,782 | 2 | 0 | 2 | 1 |
| Case 98 | 3 | 139,768,501 | 141,030,543 | 1 | 1 | 2 | 0 |
| Case 98 | 3 | 141,039,107 | 141,163,079 | 2 | 0 | 2 | 1 |
| Case 98 | 3 | 141,163,253 | 141,671,482 | 1 | 1 | 2 | 0 |
| Case 98 | 3 | 141,671,856 | 142,405,348 | 2 | 0 | 2 | 1 |
| Case 98 | 3 | 142,408,502 | 142,849,107 | 1 | 1 | 2 | 0 |
| Case 98 | 3 | 142,850,990 | 142,877,227 | 2 | 0 | 2 | 1 |
| Case 98 | 3 | 142,888,043 | 146,014,404 | 1 | 1 | 2 | 0 |
| Case 98 | 3 | 146,026,957 | 146,572,562 | 2 | 0 | 2 | 1 |
| Case 98 | 3 | 146,579,888 | 149,331,272 | 1 | 1 | 2 | 0 |
| Case 98 | 3 | 149,340,813 | 149,777,669 | 2 | 0 | 2 | 1 |
| Case 98 | 3 | 149,779,984 | 156,259,178 | 1 | 1 | 2 | 0 |
| Case 98 | 3 | 156,259,485 | 156,697,097 | 2 | 0 | 2 | 1 |
| Case 98 | 3 | 156,699,828 | 157,920,934 | 1 | 1 | 2 | 0 |
| Case 98 | 3 | 157,920,983 | 158,550,968 | 2 | 0 | 2 | 1 |
| Case 98 | 3 | 158,554,978 | 189,239,521 | 1 | 1 | 2 | 0 |
| Case 98 | 3 | 189,245,214 | 189,409,196 | 2 | 0 | 2 | 1 |
| Case 98 | 3 | 189,409,341 | 193,136,476 | 1 | 1 | 2 | 0 |
| Case 98 | 3 | 193,139,228 | 193,414,733 | 2 | 0 | 2 | 1 |
| Case 98 | 3 | 193,415,750 | 195,188,641 | 1 | 1 | 2 | 0 |
| Case 98 | 3 | 195,192,088 | 195,573,324 | 2 | 0 | 2 | 1 |
| Case 98 | 3 | 195,577,630 | 197,838,262 | 1 | 1 | 2 | 0 |
| Case 98 | 4 | 71,566      | 1,135,350   | 1 | 1 | 2 | 0 |
| Case 98 | 4 | 1,136,910   | 1,244,267   | 2 | 0 | 2 | 1 |
| Case 98 | 4 | 1,244,416   | 1,701,409   | 1 | 1 | 2 | 0 |
| Case 98 | 4 | 1,705,399   | 1,739,008   | 2 | 0 | 2 | 1 |
| Case 98 | 4 | 1,739,379   | 5,454,049   | 1 | 1 | 2 | 0 |
| Case 98 | 4 | 5,454,829   | 5,591,448   | 2 | 0 | 2 | 1 |
| Case 98 | 4 | 5,592,348   | 11,600,333  | 1 | 1 | 2 | 0 |
| Case 98 | 4 | 11,601,925  | 11,792,289  | 2 | 0 | 2 | 1 |

|         |   |             |             |   |   |   |   |
|---------|---|-------------|-------------|---|---|---|---|
| Case 98 | 4 | 11,816,679  | 11,977,042  | 1 | 1 | 2 | 0 |
| Case 98 | 4 | 11,981,872  | 12,317,409  | 2 | 0 | 2 | 1 |
| Case 98 | 4 | 12,320,676  | 12,795,135  | 1 | 1 | 2 | 0 |
| Case 98 | 4 | 12,797,555  | 13,092,007  | 2 | 0 | 2 | 1 |
| Case 98 | 4 | 13,092,297  | 24,195,161  | 1 | 1 | 2 | 0 |
| Case 98 | 4 | 24,195,219  | 24,272,929  | 2 | 0 | 2 | 1 |
| Case 98 | 4 | 24,275,114  | 28,948,730  | 1 | 1 | 2 | 0 |
| Case 98 | 4 | 28,949,043  | 29,777,723  | 2 | 0 | 2 | 1 |
| Case 98 | 4 | 29,783,037  | 30,203,202  | 1 | 1 | 2 | 0 |
| Case 98 | 4 | 30,205,924  | 30,466,859  | 2 | 0 | 2 | 1 |
| Case 98 | 4 | 30,467,399  | 31,336,704  | 1 | 1 | 2 | 0 |
| Case 98 | 4 | 31,338,387  | 31,684,540  | 2 | 0 | 2 | 1 |
| Case 98 | 4 | 31,698,470  | 31,780,528  | 1 | 1 | 2 | 0 |
| Case 98 | 4 | 31,784,698  | 32,588,326  | 2 | 0 | 2 | 1 |
| Case 98 | 4 | 32,590,048  | 32,635,777  | 1 | 1 | 2 | 0 |
| Case 98 | 4 | 32,640,520  | 34,693,304  | 2 | 0 | 2 | 1 |
| Case 98 | 4 | 34,710,850  | 39,008,793  | 1 | 1 | 2 | 0 |
| Case 98 | 4 | 39,012,630  | 39,322,017  | 2 | 0 | 2 | 1 |
| Case 98 | 4 | 39,322,028  | 43,214,691  | 1 | 1 | 2 | 0 |
| Case 98 | 4 | 43,216,821  | 43,664,997  | 2 | 0 | 2 | 1 |
| Case 98 | 4 | 43,665,919  | 44,351,013  | 1 | 1 | 2 | 0 |
| Case 98 | 4 | 44,351,941  | 44,804,733  | 2 | 0 | 2 | 1 |
| Case 98 | 4 | 44,826,773  | 49,620,898  | 1 | 1 | 2 | 0 |
| Case 98 | 4 | 52,697,856  | 56,238,263  | 1 | 1 | 2 | 0 |
| Case 98 | 4 | 56,238,847  | 56,502,178  | 2 | 0 | 2 | 1 |
| Case 98 | 4 | 56,512,574  | 64,180,587  | 1 | 1 | 2 | 0 |
| Case 98 | 4 | 64,182,495  | 64,769,162  | 2 | 0 | 2 | 1 |
| Case 98 | 4 | 64,772,647  | 65,907,274  | 1 | 1 | 2 | 0 |
| Case 98 | 4 | 65,934,317  | 66,286,206  | 2 | 0 | 2 | 1 |
| Case 98 | 4 | 66,289,006  | 68,921,021  | 1 | 1 | 2 | 0 |
| Case 98 | 4 | 68,925,075  | 69,094,575  | 2 | 0 | 2 | 1 |
| Case 98 | 4 | 69,094,981  | 80,009,984  | 1 | 1 | 2 | 0 |
| Case 98 | 4 | 80,010,684  | 80,604,625  | 2 | 0 | 2 | 1 |
| Case 98 | 4 | 80,605,580  | 86,932,486  | 1 | 1 | 2 | 0 |
| Case 98 | 4 | 86,933,060  | 87,684,113  | 2 | 0 | 2 | 1 |
| Case 98 | 4 | 87,684,148  | 88,864,775  | 1 | 1 | 2 | 0 |
| Case 98 | 4 | 88,867,961  | 89,094,064  | 2 | 0 | 2 | 1 |
| Case 98 | 4 | 89,096,641  | 93,451,321  | 1 | 1 | 2 | 0 |
| Case 98 | 4 | 93,455,880  | 93,707,288  | 2 | 0 | 2 | 1 |
| Case 98 | 4 | 93,710,269  | 96,475,314  | 1 | 1 | 2 | 0 |
| Case 98 | 4 | 96,475,689  | 96,762,158  | 2 | 0 | 2 | 1 |
| Case 98 | 4 | 96,762,167  | 98,358,280  | 1 | 1 | 2 | 0 |
| Case 98 | 4 | 98,370,425  | 99,700,351  | 2 | 0 | 2 | 1 |
| Case 98 | 4 | 99,701,724  | 108,043,696 | 1 | 1 | 2 | 0 |
| Case 98 | 4 | 108,047,174 | 108,641,300 | 2 | 0 | 2 | 1 |
| Case 98 | 4 | 108,655,834 | 117,568,631 | 1 | 1 | 2 | 0 |
| Case 98 | 4 | 117,569,267 | 118,005,853 | 2 | 0 | 2 | 1 |
| Case 98 | 4 | 118,006,170 | 121,623,057 | 1 | 1 | 2 | 0 |
| Case 98 | 4 | 121,623,516 | 121,893,316 | 2 | 0 | 2 | 1 |
| Case 98 | 4 | 121,894,207 | 124,788,456 | 1 | 1 | 2 | 0 |
| Case 98 | 4 | 124,791,509 | 125,220,846 | 2 | 0 | 2 | 1 |
| Case 98 | 4 | 125,225,084 | 125,865,319 | 1 | 1 | 2 | 0 |
| Case 98 | 4 | 125,874,154 | 126,357,469 | 2 | 0 | 2 | 1 |
| Case 98 | 4 | 126,359,401 | 145,434,688 | 1 | 1 | 2 | 0 |
| Case 98 | 4 | 145,434,744 | 146,211,177 | 2 | 0 | 2 | 1 |
| Case 98 | 4 | 146,213,427 | 150,951,692 | 1 | 1 | 2 | 0 |
| Case 98 | 4 | 150,954,229 | 152,577,526 | 2 | 0 | 2 | 1 |
| Case 98 | 4 | 152,577,960 | 158,093,737 | 1 | 1 | 2 | 0 |
| Case 98 | 4 | 158,105,424 | 159,430,701 | 2 | 0 | 2 | 1 |
| Case 98 | 4 | 159,433,657 | 164,634,372 | 1 | 1 | 2 | 0 |
| Case 98 | 4 | 164,639,989 | 164,889,372 | 2 | 0 | 2 | 1 |

|         |   |             |             |   |   |   |   |
|---------|---|-------------|-------------|---|---|---|---|
| Case 98 | 4 | 164,889,887 | 170,926,905 | 1 | 1 | 2 | 0 |
| Case 98 | 4 | 170,926,908 | 171,307,586 | 2 | 0 | 2 | 1 |
| Case 98 | 4 | 171,312,561 | 184,781,037 | 1 | 1 | 2 | 0 |
| Case 98 | 4 | 184,781,947 | 184,932,481 | 2 | 0 | 2 | 1 |
| Case 98 | 4 | 184,932,491 | 185,490,816 | 1 | 1 | 2 | 0 |
| Case 98 | 4 | 185,491,838 | 185,549,217 | 2 | 0 | 2 | 1 |
| Case 98 | 4 | 185,550,122 | 189,797,616 | 1 | 1 | 2 | 0 |
| Case 98 | 4 | 189,797,770 | 190,020,650 | 2 | 0 | 2 | 1 |
| Case 98 | 4 | 190,033,466 | 190,481,771 | 1 | 1 | 2 | 0 |
| Case 98 | 4 | 190,522,201 | 190,963,766 | 2 | 0 | 2 | 1 |
| Case 98 | 5 | 38,139      | 5,052,953   | 1 | 1 | 2 | 0 |
| Case 98 | 5 | 5,052,998   | 5,800,497   | 2 | 0 | 2 | 1 |
| Case 98 | 5 | 5,801,024   | 7,125,022   | 1 | 1 | 2 | 0 |
| Case 98 | 5 | 7,133,273   | 7,253,812   | 2 | 0 | 2 | 1 |
| Case 98 | 5 | 7,261,197   | 19,148,952  | 1 | 1 | 2 | 0 |
| Case 98 | 5 | 19,151,180  | 19,459,826  | 2 | 0 | 2 | 1 |
| Case 98 | 5 | 19,462,474  | 21,665,641  | 1 | 1 | 2 | 0 |
| Case 98 | 5 | 21,674,640  | 22,119,976  | 2 | 0 | 2 | 1 |
| Case 98 | 5 | 22,156,155  | 25,065,470  | 1 | 1 | 2 | 0 |
| Case 98 | 5 | 25,067,372  | 25,463,613  | 2 | 0 | 2 | 1 |
| Case 98 | 5 | 25,465,482  | 25,856,939  | 1 | 1 | 2 | 0 |
| Case 98 | 5 | 25,857,050  | 25,976,052  | 2 | 0 | 2 | 1 |
| Case 98 | 5 | 25,976,806  | 33,831,673  | 1 | 1 | 2 | 0 |
| Case 98 | 5 | 33,832,015  | 34,043,649  | 2 | 0 | 2 | 1 |
| Case 98 | 5 | 34,044,232  | 36,502,818  | 1 | 1 | 2 | 0 |
| Case 98 | 5 | 36,502,861  | 36,636,816  | 2 | 0 | 2 | 1 |
| Case 98 | 5 | 36,641,769  | 38,804,071  | 1 | 1 | 2 | 0 |
| Case 98 | 5 | 38,804,215  | 39,202,773  | 2 | 0 | 2 | 1 |
| Case 98 | 5 | 39,202,911  | 41,223,861  | 1 | 1 | 2 | 0 |
| Case 98 | 5 | 41,229,277  | 41,234,643  | 1 | 0 | 1 | 0 |
| Case 98 | 5 | 41,241,610  | 45,547,278  | 1 | 1 | 2 | 0 |
| Case 98 | 5 | 45,553,387  | 46,399,093  | 2 | 0 | 2 | 1 |
| Case 98 | 5 | 49,457,282  | 50,162,788  | 2 | 0 | 2 | 1 |
| Case 98 | 5 | 50,165,489  | 54,904,720  | 1 | 1 | 2 | 0 |
| Case 98 | 5 | 54,906,367  | 55,213,631  | 2 | 0 | 2 | 1 |
| Case 98 | 5 | 55,219,716  | 58,968,636  | 1 | 1 | 2 | 0 |
| Case 98 | 5 | 58,979,946  | 59,627,555  | 2 | 0 | 2 | 1 |
| Case 98 | 5 | 59,637,451  | 61,428,137  | 1 | 1 | 2 | 0 |
| Case 98 | 5 | 61,428,613  | 62,037,885  | 2 | 0 | 2 | 1 |
| Case 98 | 5 | 62,039,960  | 64,628,544  | 1 | 1 | 2 | 0 |
| Case 98 | 5 | 64,631,395  | 64,762,465  | 2 | 0 | 2 | 1 |
| Case 98 | 5 | 64,763,225  | 74,877,266  | 1 | 1 | 2 | 0 |
| Case 98 | 5 | 74,877,286  | 75,008,193  | 2 | 0 | 2 | 1 |
| Case 98 | 5 | 75,008,679  | 76,722,816  | 1 | 1 | 2 | 0 |
| Case 98 | 5 | 76,722,895  | 76,871,345  | 2 | 0 | 2 | 1 |
| Case 98 | 5 | 76,890,568  | 86,639,579  | 1 | 1 | 2 | 0 |
| Case 98 | 5 | 86,652,624  | 87,248,847  | 2 | 0 | 2 | 1 |
| Case 98 | 5 | 87,249,313  | 90,172,331  | 1 | 1 | 2 | 0 |
| Case 98 | 5 | 90,180,120  | 90,451,039  | 2 | 0 | 2 | 1 |
| Case 98 | 5 | 90,453,242  | 94,956,181  | 1 | 1 | 2 | 0 |
| Case 98 | 5 | 94,956,634  | 95,207,168  | 2 | 0 | 2 | 1 |
| Case 98 | 5 | 95,209,382  | 96,204,295  | 1 | 1 | 2 | 0 |
| Case 98 | 5 | 96,205,801  | 96,800,447  | 2 | 0 | 2 | 1 |
| Case 98 | 5 | 96,817,528  | 97,028,084  | 1 | 1 | 2 | 0 |
| Case 98 | 5 | 97,030,575  | 97,491,234  | 2 | 0 | 2 | 1 |
| Case 98 | 5 | 97,492,717  | 101,999,586 | 1 | 1 | 2 | 0 |
| Case 98 | 5 | 102,004,743 | 102,444,380 | 2 | 0 | 2 | 1 |
| Case 98 | 5 | 102,450,417 | 104,465,639 | 1 | 1 | 2 | 0 |
| Case 98 | 5 | 104,465,995 | 105,163,858 | 2 | 0 | 2 | 1 |
| Case 98 | 5 | 105,174,036 | 111,657,592 | 1 | 1 | 2 | 0 |
| Case 98 | 5 | 111,662,406 | 111,699,317 | 2 | 0 | 2 | 1 |

|         |   |             |             |   |   |   |   |
|---------|---|-------------|-------------|---|---|---|---|
| Case 98 | 5 | 111,701,910 | 112,479,054 | 1 | 1 | 2 | 0 |
| Case 98 | 5 | 112,482,033 | 112,963,488 | 2 | 0 | 2 | 1 |
| Case 98 | 5 | 112,965,145 | 116,980,662 | 1 | 1 | 2 | 0 |
| Case 98 | 5 | 116,982,602 | 117,560,263 | 2 | 0 | 2 | 1 |
| Case 98 | 5 | 117,560,863 | 118,676,529 | 1 | 1 | 2 | 0 |
| Case 98 | 5 | 118,677,093 | 119,210,995 | 2 | 0 | 2 | 1 |
| Case 98 | 5 | 119,212,976 | 120,776,767 | 1 | 1 | 2 | 0 |
| Case 98 | 5 | 120,792,844 | 120,894,696 | 2 | 0 | 2 | 1 |
| Case 98 | 5 | 120,906,150 | 122,676,525 | 1 | 1 | 2 | 0 |
| Case 98 | 5 | 122,680,189 | 123,170,490 | 2 | 0 | 2 | 1 |
| Case 98 | 5 | 123,171,342 | 123,188,660 | 1 | 1 | 2 | 0 |
| Case 98 | 5 | 123,192,434 | 123,717,754 | 2 | 0 | 2 | 1 |
| Case 98 | 5 | 123,730,483 | 132,013,179 | 1 | 1 | 2 | 0 |
| Case 98 | 5 | 132,013,789 | 132,406,153 | 2 | 0 | 2 | 1 |
| Case 98 | 5 | 132,407,688 | 138,583,691 | 1 | 1 | 2 | 0 |
| Case 98 | 5 | 138,615,856 | 138,784,595 | 2 | 0 | 2 | 1 |
| Case 98 | 5 | 138,837,135 | 139,931,620 | 1 | 1 | 2 | 0 |
| Case 98 | 5 | 139,931,629 | 139,931,644 | 1 | 0 | 1 | 0 |
| Case 98 | 5 | 139,931,646 | 141,854,163 | 1 | 1 | 2 | 0 |
| Case 98 | 5 | 141,855,300 | 141,974,653 | 2 | 0 | 2 | 1 |
| Case 98 | 5 | 141,974,913 | 142,077,863 | 1 | 1 | 2 | 0 |
| Case 98 | 5 | 142,080,602 | 142,142,015 | 2 | 0 | 2 | 1 |
| Case 98 | 5 | 142,151,659 | 143,853,469 | 1 | 1 | 2 | 0 |
| Case 98 | 5 | 143,853,561 | 144,262,851 | 2 | 0 | 2 | 1 |
| Case 98 | 5 | 144,267,106 | 151,514,171 | 1 | 1 | 2 | 0 |
| Case 98 | 5 | 151,514,956 | 151,518,810 | 1 | 0 | 1 | 0 |
| Case 98 | 5 | 151,522,878 | 156,314,526 | 1 | 1 | 2 | 0 |
| Case 98 | 5 | 156,317,797 | 156,590,267 | 2 | 0 | 2 | 1 |
| Case 98 | 5 | 156,590,335 | 158,543,969 | 1 | 1 | 2 | 0 |
| Case 98 | 5 | 158,556,738 | 158,806,244 | 2 | 0 | 2 | 1 |
| Case 98 | 5 | 158,814,533 | 169,497,800 | 1 | 1 | 2 | 0 |
| Case 98 | 5 | 169,501,527 | 169,584,072 | 2 | 0 | 2 | 1 |
| Case 98 | 5 | 169,584,169 | 171,636,926 | 1 | 1 | 2 | 0 |
| Case 98 | 5 | 171,637,734 | 171,766,706 | 2 | 0 | 2 | 1 |
| Case 98 | 5 | 171,766,766 | 180,693,127 | 1 | 1 | 2 | 0 |
| Case 98 | 6 | 108,666     | 18,223,409  | 1 | 1 | 2 | 0 |
| Case 98 | 6 | 18,224,471  | 18,578,387  | 2 | 0 | 2 | 1 |
| Case 98 | 6 | 18,579,752  | 20,943,232  | 1 | 1 | 2 | 0 |
| Case 98 | 6 | 20,952,163  | 21,142,660  | 2 | 0 | 2 | 1 |
| Case 98 | 6 | 21,144,599  | 25,701,484  | 1 | 1 | 2 | 0 |
| Case 98 | 6 | 25,701,495  | 26,027,478  | 2 | 0 | 2 | 1 |
| Case 98 | 6 | 26,030,492  | 27,491,299  | 1 | 1 | 2 | 0 |
| Case 98 | 6 | 27,498,955  | 27,730,064  | 2 | 0 | 2 | 1 |
| Case 98 | 6 | 27,730,463  | 29,733,223  | 1 | 1 | 2 | 0 |
| Case 98 | 6 | 29,733,701  | 30,363,428  | 2 | 0 | 2 | 1 |
| Case 98 | 6 | 30,363,945  | 30,471,520  | 1 | 1 | 2 | 0 |
| Case 98 | 6 | 30,475,415  | 30,553,768  | 2 | 0 | 2 | 1 |
| Case 98 | 6 | 30,553,871  | 30,930,270  | 1 | 1 | 2 | 0 |
| Case 98 | 6 | 30,930,841  | 30,987,786  | 2 | 0 | 2 | 1 |
| Case 98 | 6 | 30,989,770  | 32,838,269  | 1 | 1 | 2 | 0 |
| Case 98 | 6 | 32,838,584  | 32,878,275  | 2 | 0 | 2 | 1 |
| Case 98 | 6 | 32,879,233  | 32,986,986  | 1 | 1 | 2 | 0 |
| Case 98 | 6 | 32,987,277  | 33,023,946  | 2 | 0 | 2 | 1 |
| Case 98 | 6 | 33,024,499  | 34,592,731  | 1 | 1 | 2 | 0 |
| Case 98 | 6 | 34,607,958  | 34,827,318  | 2 | 0 | 2 | 1 |
| Case 98 | 6 | 34,828,553  | 37,934,269  | 1 | 1 | 2 | 0 |
| Case 98 | 6 | 37,949,615  | 38,222,018  | 2 | 0 | 2 | 1 |
| Case 98 | 6 | 38,223,386  | 39,954,504  | 1 | 1 | 2 | 0 |
| Case 98 | 6 | 39,961,907  | 40,400,171  | 2 | 0 | 2 | 1 |
| Case 98 | 6 | 40,400,195  | 40,645,737  | 1 | 1 | 2 | 0 |
| Case 98 | 6 | 40,648,757  | 40,894,039  | 2 | 0 | 2 | 1 |

|         |   |             |             |   |   |   |   |
|---------|---|-------------|-------------|---|---|---|---|
| Case 98 | 6 | 40,896,656  | 43,244,714  | 1 | 1 | 2 | 0 |
| Case 98 | 6 | 43,245,641  | 43,402,450  | 2 | 0 | 2 | 1 |
| Case 98 | 6 | 43,402,536  | 46,296,710  | 1 | 1 | 2 | 0 |
| Case 98 | 6 | 46,304,945  | 46,592,879  | 2 | 0 | 2 | 1 |
| Case 98 | 6 | 46,593,179  | 46,717,652  | 1 | 1 | 2 | 0 |
| Case 98 | 6 | 46,719,818  | 46,830,740  | 2 | 0 | 2 | 1 |
| Case 98 | 6 | 46,832,813  | 51,889,474  | 1 | 1 | 2 | 0 |
| Case 98 | 6 | 51,889,515  | 52,019,663  | 2 | 0 | 2 | 1 |
| Case 98 | 6 | 52,022,832  | 53,595,083  | 1 | 1 | 2 | 0 |
| Case 98 | 6 | 53,595,753  | 53,865,667  | 2 | 0 | 2 | 1 |
| Case 98 | 6 | 53,866,030  | 57,414,234  | 1 | 1 | 2 | 0 |
| Case 98 | 6 | 57,444,439  | 58,752,089  | 2 | 0 | 2 | 1 |
| Case 98 | 6 | 61,891,118  | 62,510,310  | 2 | 0 | 2 | 1 |
| Case 98 | 6 | 62,515,691  | 67,339,041  | 1 | 1 | 2 | 0 |
| Case 98 | 6 | 67,348,139  | 67,758,587  | 2 | 0 | 2 | 1 |
| Case 98 | 6 | 67,770,505  | 69,328,787  | 1 | 1 | 2 | 0 |
| Case 98 | 6 | 69,334,292  | 69,610,281  | 2 | 0 | 2 | 1 |
| Case 98 | 6 | 69,614,768  | 69,989,413  | 1 | 1 | 2 | 0 |
| Case 98 | 6 | 70,001,186  | 70,556,598  | 2 | 0 | 2 | 1 |
| Case 98 | 6 | 70,562,435  | 71,609,384  | 1 | 1 | 2 | 0 |
| Case 98 | 6 | 71,609,707  | 71,919,099  | 2 | 0 | 2 | 1 |
| Case 98 | 6 | 71,922,715  | 74,126,941  | 1 | 1 | 2 | 0 |
| Case 98 | 6 | 74,134,199  | 74,136,427  | 1 | 0 | 1 | 0 |
| Case 98 | 6 | 74,148,730  | 77,357,443  | 1 | 1 | 2 | 0 |
| Case 98 | 6 | 77,357,678  | 77,766,235  | 2 | 0 | 2 | 1 |
| Case 98 | 6 | 77,773,428  | 85,039,069  | 1 | 1 | 2 | 0 |
| Case 98 | 6 | 85,043,476  | 85,376,381  | 2 | 0 | 2 | 1 |
| Case 98 | 6 | 85,379,474  | 87,124,569  | 1 | 1 | 2 | 0 |
| Case 98 | 6 | 87,125,624  | 87,646,919  | 2 | 0 | 2 | 1 |
| Case 98 | 6 | 87,648,471  | 89,318,640  | 1 | 1 | 2 | 0 |
| Case 98 | 6 | 89,320,589  | 89,960,222  | 2 | 0 | 2 | 1 |
| Case 98 | 6 | 89,963,796  | 96,379,508  | 1 | 1 | 2 | 0 |
| Case 98 | 6 | 96,380,002  | 96,834,665  | 2 | 0 | 2 | 1 |
| Case 98 | 6 | 96,835,536  | 105,781,267 | 1 | 1 | 2 | 0 |
| Case 98 | 6 | 105,781,538 | 105,841,041 | 2 | 0 | 2 | 1 |
| Case 98 | 6 | 105,841,952 | 111,374,253 | 1 | 1 | 2 | 0 |
| Case 98 | 6 | 111,378,729 | 111,922,720 | 2 | 0 | 2 | 1 |
| Case 98 | 6 | 111,924,410 | 116,156,793 | 1 | 1 | 2 | 0 |
| Case 98 | 6 | 116,164,103 | 116,596,247 | 2 | 0 | 2 | 1 |
| Case 98 | 6 | 116,598,475 | 121,236,230 | 1 | 1 | 2 | 0 |
| Case 98 | 6 | 121,238,247 | 121,671,944 | 2 | 0 | 2 | 1 |
| Case 98 | 6 | 121,674,586 | 133,073,811 | 1 | 1 | 2 | 0 |
| Case 98 | 6 | 133,076,896 | 133,408,229 | 2 | 0 | 2 | 1 |
| Case 98 | 6 | 133,416,156 | 137,926,848 | 1 | 1 | 2 | 0 |
| Case 98 | 6 | 137,929,810 | 138,616,344 | 2 | 0 | 2 | 1 |
| Case 98 | 6 | 138,617,294 | 147,851,974 | 1 | 1 | 2 | 0 |
| Case 98 | 6 | 147,852,697 | 147,987,946 | 2 | 0 | 2 | 1 |
| Case 98 | 6 | 147,988,029 | 148,940,808 | 1 | 1 | 2 | 0 |
| Case 98 | 6 | 148,943,174 | 149,168,205 | 2 | 0 | 2 | 1 |
| Case 98 | 6 | 149,175,496 | 150,414,026 | 1 | 1 | 2 | 0 |
| Case 98 | 6 | 150,416,202 | 150,680,274 | 2 | 0 | 2 | 1 |
| Case 98 | 6 | 150,683,395 | 150,731,232 | 1 | 1 | 2 | 0 |
| Case 98 | 6 | 150,731,655 | 150,941,310 | 2 | 0 | 2 | 1 |
| Case 98 | 6 | 150,947,524 | 153,199,689 | 1 | 1 | 2 | 0 |
| Case 98 | 6 | 153,200,563 | 153,345,468 | 2 | 0 | 2 | 1 |
| Case 98 | 6 | 153,345,533 | 158,484,902 | 1 | 1 | 2 | 0 |
| Case 98 | 6 | 158,486,110 | 158,626,332 | 2 | 0 | 2 | 1 |
| Case 98 | 6 | 158,628,384 | 160,789,256 | 1 | 1 | 2 | 0 |
| Case 98 | 6 | 160,789,296 | 160,952,780 | 2 | 0 | 2 | 1 |
| Case 98 | 6 | 160,952,816 | 170,980,171 | 1 | 1 | 2 | 0 |
| Case 98 | 7 | 44,935      | 2,057,934   | 1 | 1 | 2 | 0 |



|         |   |             |             |   |   |   |   |
|---------|---|-------------|-------------|---|---|---|---|
| Case 98 | 7 | 2,068,470   | 2,403,371   | 2 | 0 | 2 | 1 |
| Case 98 | 7 | 2,405,127   | 4,813,383   | 1 | 1 | 2 | 0 |
| Case 98 | 7 | 4,814,613   | 4,843,335   | 2 | 0 | 2 | 1 |
| Case 98 | 7 | 4,845,701   | 10,146,653  | 1 | 1 | 2 | 0 |
| Case 98 | 7 | 10,148,521  | 10,343,038  | 2 | 0 | 2 | 1 |
| Case 98 | 7 | 10,345,513  | 11,563,097  | 1 | 1 | 2 | 0 |
| Case 98 | 7 | 11,568,530  | 11,632,962  | 2 | 0 | 2 | 1 |
| Case 98 | 7 | 11,633,116  | 14,642,523  | 1 | 1 | 2 | 0 |
| Case 98 | 7 | 14,644,667  | 14,844,336  | 2 | 0 | 2 | 1 |
| Case 98 | 7 | 14,846,853  | 15,721,466  | 1 | 1 | 2 | 0 |
| Case 98 | 7 | 15,722,836  | 16,401,190  | 2 | 0 | 2 | 1 |
| Case 98 | 7 | 16,406,272  | 19,617,468  | 1 | 1 | 2 | 0 |
| Case 98 | 7 | 19,617,929  | 19,979,804  | 2 | 0 | 2 | 1 |
| Case 98 | 7 | 19,980,396  | 22,392,134  | 1 | 1 | 2 | 0 |
| Case 98 | 7 | 22,397,187  | 22,556,193  | 2 | 0 | 2 | 1 |
| Case 98 | 7 | 22,580,985  | 23,451,288  | 1 | 1 | 2 | 0 |
| Case 98 | 7 | 23,456,221  | 23,959,375  | 2 | 0 | 2 | 1 |
| Case 98 | 7 | 23,962,975  | 29,628,434  | 1 | 1 | 2 | 0 |
| Case 98 | 7 | 29,631,511  | 29,647,662  | 2 | 0 | 2 | 1 |
| Case 98 | 7 | 29,648,077  | 31,120,229  | 1 | 1 | 2 | 0 |
| Case 98 | 7 | 31,121,355  | 31,497,237  | 2 | 0 | 2 | 1 |
| Case 98 | 7 | 31,500,579  | 33,312,783  | 1 | 1 | 2 | 0 |
| Case 98 | 7 | 33,346,932  | 33,554,162  | 2 | 0 | 2 | 1 |
| Case 98 | 7 | 33,554,672  | 47,450,271  | 1 | 1 | 2 | 0 |
| Case 98 | 7 | 47,451,366  | 47,565,504  | 2 | 0 | 2 | 1 |
| Case 98 | 7 | 47,566,295  | 49,208,805  | 1 | 1 | 2 | 0 |
| Case 98 | 7 | 49,217,173  | 49,621,833  | 2 | 0 | 2 | 1 |
| Case 98 | 7 | 49,629,291  | 49,681,873  | 1 | 1 | 2 | 0 |
| Case 98 | 7 | 49,686,888  | 50,180,972  | 2 | 0 | 2 | 1 |
| Case 98 | 7 | 50,182,079  | 53,500,844  | 1 | 1 | 2 | 0 |
| Case 98 | 7 | 53,502,556  | 54,058,897  | 2 | 0 | 2 | 1 |
| Case 98 | 7 | 54,059,050  | 54,905,350  | 1 | 1 | 2 | 0 |
| Case 98 | 7 | 54,905,511  | 55,142,435  | 2 | 0 | 2 | 1 |
| Case 98 | 7 | 55,144,156  | 56,068,980  | 1 | 1 | 2 | 0 |
| Case 98 | 7 | 56,074,118  | 56,155,371  | 2 | 0 | 2 | 1 |
| Case 98 | 7 | 56,155,390  | 56,727,631  | 1 | 1 | 2 | 0 |
| Case 98 | 7 | 56,755,583  | 57,215,852  | 2 | 0 | 2 | 1 |
| Case 98 | 7 | 57,217,249  | 58,019,061  | 1 | 1 | 2 | 0 |
| Case 98 | 7 | 61,056,053  | 64,406,081  | 1 | 1 | 2 | 0 |
| Case 98 | 7 | 64,409,809  | 64,745,413  | 2 | 0 | 2 | 1 |
| Case 98 | 7 | 64,751,046  | 69,403,890  | 1 | 1 | 2 | 0 |
| Case 98 | 7 | 69,418,905  | 69,991,859  | 2 | 0 | 2 | 1 |
| Case 98 | 7 | 69,997,575  | 72,169,613  | 1 | 1 | 2 | 0 |
| Case 98 | 7 | 72,193,854  | 72,934,080  | 2 | 0 | 2 | 1 |
| Case 98 | 7 | 72,939,482  | 79,888,510  | 1 | 1 | 2 | 0 |
| Case 98 | 7 | 79,892,337  | 80,054,945  | 2 | 0 | 2 | 1 |
| Case 98 | 7 | 80,055,731  | 82,784,660  | 1 | 1 | 2 | 0 |
| Case 98 | 7 | 82,784,740  | 82,965,353  | 2 | 0 | 2 | 1 |
| Case 98 | 7 | 82,968,338  | 86,115,922  | 1 | 1 | 2 | 0 |
| Case 98 | 7 | 86,118,757  | 86,830,190  | 2 | 0 | 2 | 1 |
| Case 98 | 7 | 86,847,321  | 91,289,228  | 1 | 1 | 2 | 0 |
| Case 98 | 7 | 91,299,161  | 91,856,816  | 2 | 0 | 2 | 1 |
| Case 98 | 7 | 91,861,656  | 93,006,563  | 1 | 1 | 2 | 0 |
| Case 98 | 7 | 93,009,475  | 93,660,234  | 2 | 0 | 2 | 1 |
| Case 98 | 7 | 93,662,801  | 99,017,694  | 1 | 1 | 2 | 0 |
| Case 98 | 7 | 99,017,771  | 99,580,371  | 2 | 0 | 2 | 1 |
| Case 98 | 7 | 99,583,286  | 100,634,643 | 1 | 1 | 2 | 0 |
| Case 98 | 7 | 100,634,718 | 100,806,802 | 2 | 0 | 2 | 1 |
| Case 98 | 7 | 100,807,419 | 103,581,626 | 1 | 1 | 2 | 0 |
| Case 98 | 7 | 103,581,806 | 104,106,026 | 2 | 0 | 2 | 1 |
| Case 98 | 7 | 104,107,166 | 107,823,258 | 1 | 1 | 2 | 0 |

|         |   |             |             |   |   |   |   |
|---------|---|-------------|-------------|---|---|---|---|
| Case 98 | 7 | 107,823,265 | 108,055,858 | 2 | 0 | 2 | 1 |
| Case 98 | 7 | 108,058,574 | 109,819,227 | 1 | 1 | 2 | 0 |
| Case 98 | 7 | 109,827,761 | 109,871,406 | 1 | 0 | 1 | 0 |
| Case 98 | 7 | 109,875,729 | 122,492,340 | 1 | 1 | 2 | 0 |
| Case 98 | 7 | 122,493,144 | 122,808,528 | 2 | 0 | 2 | 1 |
| Case 98 | 7 | 122,808,603 | 124,165,999 | 1 | 1 | 2 | 0 |
| Case 98 | 7 | 124,172,307 | 124,550,133 | 2 | 0 | 2 | 1 |
| Case 98 | 7 | 124,558,339 | 125,115,662 | 1 | 1 | 2 | 0 |
| Case 98 | 7 | 125,116,814 | 125,330,439 | 2 | 0 | 2 | 1 |
| Case 98 | 7 | 125,339,318 | 146,550,239 | 1 | 1 | 2 | 0 |
| Case 98 | 7 | 146,553,618 | 146,780,248 | 2 | 0 | 2 | 1 |
| Case 98 | 7 | 146,786,698 | 148,801,606 | 1 | 1 | 2 | 0 |
| Case 98 | 7 | 148,801,658 | 148,998,960 | 2 | 0 | 2 | 1 |
| Case 98 | 7 | 149,005,429 | 149,504,070 | 1 | 1 | 2 | 0 |
| Case 98 | 7 | 149,505,575 | 149,828,048 | 2 | 0 | 2 | 1 |
| Case 98 | 7 | 149,837,340 | 150,213,019 | 1 | 1 | 2 | 0 |
| Case 98 | 7 | 150,213,314 | 150,353,227 | 2 | 0 | 2 | 1 |
| Case 98 | 7 | 150,369,447 | 159,119,486 | 1 | 1 | 2 | 0 |
| Case 98 | 8 | 164,984     | 3,029,364   | 1 | 1 | 2 | 0 |
| Case 98 | 8 | 3,030,335   | 3,035,992   | 1 | 0 | 1 | 0 |
| Case 98 | 8 | 3,037,530   | 3,926,858   | 1 | 1 | 2 | 0 |
| Case 98 | 8 | 3,928,521   | 4,052,555   | 2 | 0 | 2 | 1 |
| Case 98 | 8 | 4,052,860   | 5,255,714   | 1 | 1 | 2 | 0 |
| Case 98 | 8 | 5,258,496   | 5,412,336   | 2 | 0 | 2 | 1 |
| Case 98 | 8 | 5,413,325   | 6,270,096   | 1 | 1 | 2 | 0 |
| Case 98 | 8 | 6,272,353   | 6,377,507   | 2 | 0 | 2 | 1 |
| Case 98 | 8 | 6,378,720   | 13,956,109  | 1 | 1 | 2 | 0 |
| Case 98 | 8 | 13,958,463  | 14,143,471  | 2 | 0 | 2 | 1 |
| Case 98 | 8 | 14,144,867  | 14,614,134  | 1 | 1 | 2 | 0 |
| Case 98 | 8 | 14,615,974  | 14,951,943  | 2 | 0 | 2 | 1 |
| Case 98 | 8 | 14,956,717  | 15,725,282  | 1 | 1 | 2 | 0 |
| Case 98 | 8 | 15,732,889  | 15,815,994  | 2 | 0 | 2 | 1 |
| Case 98 | 8 | 15,820,384  | 16,172,469  | 1 | 1 | 2 | 0 |
| Case 98 | 8 | 16,173,694  | 16,526,958  | 2 | 0 | 2 | 1 |
| Case 98 | 8 | 16,538,391  | 26,683,792  | 1 | 1 | 2 | 0 |
| Case 98 | 8 | 26,688,826  | 26,883,003  | 2 | 0 | 2 | 1 |
| Case 98 | 8 | 26,892,214  | 39,550,178  | 1 | 1 | 2 | 0 |
| Case 98 | 8 | 39,550,180  | 39,771,451  | 2 | 0 | 2 | 1 |
| Case 98 | 8 | 39,775,653  | 41,025,184  | 1 | 1 | 2 | 0 |
| Case 98 | 8 | 41,025,313  | 41,273,233  | 2 | 0 | 2 | 1 |
| Case 98 | 8 | 41,292,579  | 43,387,474  | 1 | 1 | 2 | 0 |
| Case 98 | 8 | 43,389,423  | 43,791,691  | 2 | 0 | 2 | 1 |
| Case 98 | 8 | 46,886,735  | 48,290,688  | 2 | 0 | 2 | 1 |
| Case 98 | 8 | 48,308,973  | 53,110,206  | 1 | 1 | 2 | 0 |
| Case 98 | 8 | 53,111,052  | 53,328,331  | 2 | 0 | 2 | 1 |
| Case 98 | 8 | 53,334,176  | 54,340,446  | 1 | 1 | 2 | 0 |
| Case 98 | 8 | 54,343,357  | 54,829,323  | 2 | 0 | 2 | 1 |
| Case 98 | 8 | 54,835,697  | 63,588,151  | 1 | 1 | 2 | 0 |
| Case 98 | 8 | 63,600,769  | 63,903,324  | 2 | 0 | 2 | 1 |
| Case 98 | 8 | 63,905,750  | 70,864,617  | 1 | 1 | 2 | 0 |
| Case 98 | 8 | 70,865,668  | 72,083,227  | 2 | 0 | 2 | 1 |
| Case 98 | 8 | 72,083,588  | 74,272,171  | 1 | 1 | 2 | 0 |
| Case 98 | 8 | 74,274,191  | 74,409,780  | 2 | 0 | 2 | 1 |
| Case 98 | 8 | 74,409,852  | 77,539,322  | 1 | 1 | 2 | 0 |
| Case 98 | 8 | 77,566,481  | 78,054,417  | 2 | 0 | 2 | 1 |
| Case 98 | 8 | 78,057,807  | 84,563,191  | 1 | 1 | 2 | 0 |
| Case 98 | 8 | 84,566,741  | 84,572,978  | 2 | 0 | 2 | 1 |
| Case 98 | 8 | 84,576,995  | 94,627,082  | 1 | 1 | 2 | 0 |
| Case 98 | 8 | 94,633,233  | 95,002,352  | 2 | 0 | 2 | 1 |
| Case 98 | 8 | 95,006,099  | 102,889,127 | 1 | 1 | 2 | 0 |
| Case 98 | 8 | 102,899,450 | 103,542,538 | 2 | 0 | 2 | 1 |

|         |   |             |             |   |   |   |   |
|---------|---|-------------|-------------|---|---|---|---|
| Case 98 | 8 | 103,548,562 | 119,814,670 | 1 | 1 | 2 | 0 |
| Case 98 | 8 | 119,815,147 | 120,235,752 | 2 | 0 | 2 | 1 |
| Case 98 | 8 | 120,239,647 | 133,534,265 | 1 | 1 | 2 | 0 |
| Case 98 | 8 | 133,534,460 | 133,977,758 | 2 | 0 | 2 | 1 |
| Case 98 | 8 | 133,980,143 | 134,657,960 | 1 | 1 | 2 | 0 |
| Case 98 | 8 | 134,660,028 | 134,736,033 | 2 | 0 | 2 | 1 |
| Case 98 | 8 | 134,756,506 | 136,024,190 | 1 | 1 | 2 | 0 |
| Case 98 | 8 | 136,032,287 | 136,477,268 | 2 | 0 | 2 | 1 |
| Case 98 | 8 | 136,483,701 | 142,581,653 | 1 | 1 | 2 | 0 |
| Case 98 | 8 | 142,582,850 | 142,703,492 | 2 | 0 | 2 | 1 |
| Case 98 | 8 | 142,705,898 | 143,900,017 | 1 | 1 | 2 | 0 |
| Case 98 | 8 | 143,901,987 | 144,134,961 | 2 | 0 | 2 | 1 |
| Case 98 | 8 | 144,134,969 | 145,579,973 | 1 | 1 | 2 | 0 |
| Case 98 | 8 | 145,580,008 | 145,668,481 | 2 | 0 | 2 | 1 |
| Case 98 | 8 | 145,675,164 | 146,112,944 | 1 | 1 | 2 | 0 |
| Case 98 | 8 | 146,123,853 | 146,293,414 | 2 | 0 | 2 | 1 |
| Case 98 | 9 | 46,587      | 523,495     | 1 | 1 | 2 | 0 |
| Case 98 | 9 | 525,814     | 712,390     | 2 | 0 | 2 | 1 |
| Case 98 | 9 | 712,419     | 8,382,966   | 1 | 1 | 2 | 0 |
| Case 98 | 9 | 8,385,838   | 8,435,110   | 2 | 0 | 2 | 1 |
| Case 98 | 9 | 8,435,525   | 9,196,661   | 1 | 1 | 2 | 0 |
| Case 98 | 9 | 9,197,160   | 9,374,664   | 2 | 0 | 2 | 1 |
| Case 98 | 9 | 9,377,679   | 10,225,500  | 1 | 1 | 2 | 0 |
| Case 98 | 9 | 10,225,533  | 10,354,430  | 2 | 0 | 2 | 1 |
| Case 98 | 9 | 10,354,770  | 11,194,115  | 1 | 1 | 2 | 0 |
| Case 98 | 9 | 11,194,132  | 11,787,966  | 2 | 0 | 2 | 1 |
| Case 98 | 9 | 11,790,536  | 12,058,197  | 1 | 1 | 2 | 0 |
| Case 98 | 9 | 12,061,324  | 12,194,855  | 2 | 0 | 2 | 1 |
| Case 98 | 9 | 12,195,026  | 15,393,381  | 1 | 1 | 2 | 0 |
| Case 98 | 9 | 15,397,969  | 16,123,596  | 2 | 0 | 2 | 1 |
| Case 98 | 9 | 16,125,443  | 16,669,114  | 1 | 1 | 2 | 0 |
| Case 98 | 9 | 16,669,912  | 16,920,749  | 2 | 0 | 2 | 1 |
| Case 98 | 9 | 16,929,803  | 22,301,053  | 1 | 1 | 2 | 0 |
| Case 98 | 9 | 22,301,383  | 22,451,339  | 2 | 0 | 2 | 1 |
| Case 98 | 9 | 22,451,349  | 36,207,967  | 1 | 1 | 2 | 0 |
| Case 98 | 9 | 36,211,623  | 36,437,700  | 2 | 0 | 2 | 1 |
| Case 98 | 9 | 36,456,543  | 36,798,025  | 1 | 1 | 2 | 0 |
| Case 98 | 9 | 36,798,742  | 36,942,624  | 2 | 0 | 2 | 1 |
| Case 98 | 9 | 36,943,396  | 37,740,581  | 1 | 1 | 2 | 0 |
| Case 98 | 9 | 37,740,594  | 38,159,475  | 2 | 0 | 2 | 1 |
| Case 98 | 9 | 38,160,747  | 46,944,322  | 1 | 1 | 2 | 0 |
| Case 98 | 9 | 65,629,772  | 75,540,187  | 1 | 1 | 2 | 0 |
| Case 98 | 9 | 75,540,393  | 75,682,680  | 2 | 0 | 2 | 1 |
| Case 98 | 9 | 75,694,366  | 83,514,230  | 1 | 1 | 2 | 0 |
| Case 98 | 9 | 83,524,227  | 83,928,428  | 2 | 0 | 2 | 1 |
| Case 98 | 9 | 83,928,740  | 95,806,365  | 1 | 1 | 2 | 0 |
| Case 98 | 9 | 95,806,823  | 96,117,348  | 2 | 0 | 2 | 1 |
| Case 98 | 9 | 96,125,819  | 101,221,143 | 1 | 1 | 2 | 0 |
| Case 98 | 9 | 101,229,396 | 101,333,453 | 2 | 0 | 2 | 1 |
| Case 98 | 9 | 101,333,901 | 101,763,091 | 1 | 1 | 2 | 0 |
| Case 98 | 9 | 101,763,633 | 101,816,909 | 2 | 0 | 2 | 1 |
| Case 98 | 9 | 101,817,602 | 104,323,402 | 1 | 1 | 2 | 0 |
| Case 98 | 9 | 104,323,459 | 104,553,765 | 2 | 0 | 2 | 1 |
| Case 98 | 9 | 104,554,756 | 107,991,283 | 1 | 1 | 2 | 0 |
| Case 98 | 9 | 107,992,004 | 108,596,042 | 2 | 0 | 2 | 1 |
| Case 98 | 9 | 108,597,465 | 114,919,707 | 1 | 1 | 2 | 0 |
| Case 98 | 9 | 114,922,067 | 115,167,146 | 2 | 0 | 2 | 1 |
| Case 98 | 9 | 115,167,994 | 117,339,877 | 1 | 1 | 2 | 0 |
| Case 98 | 9 | 117,348,466 | 117,451,913 | 2 | 0 | 2 | 1 |
| Case 98 | 9 | 117,453,668 | 119,117,464 | 1 | 1 | 2 | 0 |
| Case 98 | 9 | 119,122,342 | 119,476,270 | 2 | 0 | 2 | 1 |

|         |    |             |             |   |   |   |   |
|---------|----|-------------|-------------|---|---|---|---|
| Case 98 | 9  | 119,482,114 | 123,540,630 | 1 | 1 | 2 | 0 |
| Case 98 | 9  | 123,544,003 | 124,170,490 | 2 | 0 | 2 | 1 |
| Case 98 | 9  | 124,189,101 | 126,772,954 | 1 | 1 | 2 | 0 |
| Case 98 | 9  | 126,777,521 | 126,935,882 | 2 | 0 | 2 | 1 |
| Case 98 | 9  | 126,946,822 | 129,166,088 | 1 | 1 | 2 | 0 |
| Case 98 | 9  | 129,170,242 | 129,310,354 | 2 | 0 | 2 | 1 |
| Case 98 | 9  | 129,310,775 | 129,613,454 | 1 | 1 | 2 | 0 |
| Case 98 | 9  | 129,613,696 | 130,027,260 | 2 | 0 | 2 | 1 |
| Case 98 | 9  | 130,034,215 | 130,430,116 | 1 | 1 | 2 | 0 |
| Case 98 | 9  | 130,430,604 | 130,580,575 | 2 | 0 | 2 | 1 |
| Case 98 | 9  | 130,580,638 | 133,009,150 | 1 | 1 | 2 | 0 |
| Case 98 | 9  | 133,011,232 | 133,335,415 | 2 | 0 | 2 | 1 |
| Case 98 | 9  | 133,338,393 | 139,256,468 | 1 | 1 | 2 | 0 |
| Case 98 | 9  | 139,256,477 | 139,409,068 | 2 | 0 | 2 | 1 |
| Case 98 | 9  | 139,409,089 | 139,571,444 | 1 | 1 | 2 | 0 |
| Case 98 | 9  | 139,571,471 | 139,753,685 | 2 | 0 | 2 | 1 |
| Case 98 | 9  | 139,753,751 | 141,066,491 | 1 | 1 | 2 | 0 |
| Case 98 | 10 | 98,087      | 3,452,939   | 1 | 1 | 2 | 0 |
| Case 98 | 10 | 3,457,288   | 3,706,894   | 2 | 0 | 2 | 1 |
| Case 98 | 10 | 3,707,650   | 4,238,934   | 1 | 1 | 2 | 0 |
| Case 98 | 10 | 4,240,572   | 4,505,667   | 2 | 0 | 2 | 1 |
| Case 98 | 10 | 4,507,840   | 5,139,626   | 1 | 1 | 2 | 0 |
| Case 98 | 10 | 5,139,642   | 5,327,477   | 2 | 0 | 2 | 1 |
| Case 98 | 10 | 5,327,676   | 15,629,360  | 1 | 1 | 2 | 0 |
| Case 98 | 10 | 15,633,157  | 15,828,645  | 2 | 0 | 2 | 1 |
| Case 98 | 10 | 15,831,755  | 25,227,988  | 1 | 1 | 2 | 0 |
| Case 98 | 10 | 25,231,171  | 25,550,451  | 2 | 0 | 2 | 1 |
| Case 98 | 10 | 25,555,314  | 26,171,121  | 1 | 1 | 2 | 0 |
| Case 98 | 10 | 26,173,364  | 26,483,183  | 2 | 0 | 2 | 1 |
| Case 98 | 10 | 26,483,265  | 27,159,868  | 1 | 1 | 2 | 0 |
| Case 98 | 10 | 27,160,932  | 27,258,640  | 2 | 0 | 2 | 1 |
| Case 98 | 10 | 27,264,859  | 27,674,288  | 1 | 1 | 2 | 0 |
| Case 98 | 10 | 27,678,534  | 27,825,885  | 2 | 0 | 2 | 1 |
| Case 98 | 10 | 27,826,951  | 29,786,463  | 1 | 1 | 2 | 0 |
| Case 98 | 10 | 29,789,094  | 29,892,003  | 2 | 0 | 2 | 1 |
| Case 98 | 10 | 29,892,296  | 30,233,296  | 1 | 1 | 2 | 0 |
| Case 98 | 10 | 30,233,374  | 30,533,660  | 2 | 0 | 2 | 1 |
| Case 98 | 10 | 30,537,797  | 31,997,937  | 1 | 1 | 2 | 0 |
| Case 98 | 10 | 31,998,017  | 32,450,499  | 2 | 0 | 2 | 1 |
| Case 98 | 10 | 32,450,551  | 39,097,912  | 1 | 1 | 2 | 0 |
| Case 98 | 10 | 42,436,301  | 56,742,013  | 1 | 1 | 2 | 0 |
| Case 98 | 10 | 56,745,512  | 57,025,991  | 2 | 0 | 2 | 1 |
| Case 98 | 10 | 57,026,067  | 57,429,963  | 1 | 1 | 2 | 0 |
| Case 98 | 10 | 57,430,146  | 57,547,092  | 2 | 0 | 2 | 1 |
| Case 98 | 10 | 57,549,296  | 57,667,668  | 1 | 1 | 2 | 0 |
| Case 98 | 10 | 57,669,027  | 58,316,293  | 2 | 0 | 2 | 1 |
| Case 98 | 10 | 58,317,415  | 58,736,121  | 1 | 1 | 2 | 0 |
| Case 98 | 10 | 58,736,265  | 58,797,872  | 2 | 0 | 2 | 1 |
| Case 98 | 10 | 58,801,996  | 62,184,843  | 1 | 1 | 2 | 0 |
| Case 98 | 10 | 62,185,494  | 62,551,276  | 2 | 0 | 2 | 1 |
| Case 98 | 10 | 62,552,732  | 70,783,075  | 1 | 1 | 2 | 0 |
| Case 98 | 10 | 70,799,421  | 70,987,072  | 2 | 0 | 2 | 1 |
| Case 98 | 10 | 70,987,096  | 71,714,537  | 1 | 1 | 2 | 0 |
| Case 98 | 10 | 71,714,998  | 71,876,382  | 2 | 0 | 2 | 1 |
| Case 98 | 10 | 71,876,390  | 80,669,894  | 1 | 1 | 2 | 0 |
| Case 98 | 10 | 80,672,227  | 80,768,033  | 2 | 0 | 2 | 1 |
| Case 98 | 10 | 80,772,541  | 81,984,357  | 1 | 1 | 2 | 0 |
| Case 98 | 10 | 81,984,564  | 82,359,857  | 2 | 0 | 2 | 1 |
| Case 98 | 10 | 82,362,638  | 83,982,090  | 1 | 1 | 2 | 0 |
| Case 98 | 10 | 83,988,809  | 84,383,277  | 2 | 0 | 2 | 1 |
| Case 98 | 10 | 84,385,896  | 85,961,608  | 1 | 1 | 2 | 0 |

|         |    |             |             |   |   |   |   |
|---------|----|-------------|-------------|---|---|---|---|
| Case 98 | 10 | 85,961,632  | 86,016,166  | 2 | 0 | 2 | 1 |
| Case 98 | 10 | 86,016,490  | 88,088,456  | 1 | 1 | 2 | 0 |
| Case 98 | 10 | 88,100,089  | 88,439,193  | 2 | 0 | 2 | 1 |
| Case 98 | 10 | 88,439,895  | 90,462,716  | 1 | 1 | 2 | 0 |
| Case 98 | 10 | 90,465,083  | 90,492,288  | 2 | 0 | 2 | 1 |
| Case 98 | 10 | 90,492,297  | 91,395,428  | 1 | 1 | 2 | 0 |
| Case 98 | 10 | 91,402,542  | 92,292,960  | 2 | 0 | 2 | 1 |
| Case 98 | 10 | 92,302,869  | 99,003,811  | 1 | 1 | 2 | 0 |
| Case 98 | 10 | 99,004,171  | 99,366,769  | 2 | 0 | 2 | 1 |
| Case 98 | 10 | 99,371,292  | 103,900,090 | 1 | 1 | 2 | 0 |
| Case 98 | 10 | 103,900,729 | 104,536,151 | 2 | 0 | 2 | 1 |
| Case 98 | 10 | 104,546,284 | 106,357,532 | 1 | 1 | 2 | 0 |
| Case 98 | 10 | 106,361,945 | 107,033,965 | 2 | 0 | 2 | 1 |
| Case 98 | 10 | 107,045,093 | 107,403,241 | 1 | 1 | 2 | 0 |
| Case 98 | 10 | 107,409,121 | 107,842,158 | 2 | 0 | 2 | 1 |
| Case 98 | 10 | 107,842,444 | 109,486,011 | 1 | 1 | 2 | 0 |
| Case 98 | 10 | 109,486,048 | 109,580,995 | 2 | 0 | 2 | 1 |
| Case 98 | 10 | 109,581,185 | 121,001,183 | 1 | 1 | 2 | 0 |
| Case 98 | 10 | 121,010,817 | 121,196,335 | 2 | 0 | 2 | 1 |
| Case 98 | 10 | 121,197,057 | 126,658,862 | 1 | 1 | 2 | 0 |
| Case 98 | 10 | 126,670,356 | 126,741,541 | 2 | 0 | 2 | 1 |
| Case 98 | 10 | 126,743,096 | 129,774,063 | 1 | 1 | 2 | 0 |
| Case 98 | 10 | 129,775,360 | 130,105,852 | 2 | 0 | 2 | 1 |
| Case 98 | 10 | 130,107,905 | 135,477,883 | 1 | 1 | 2 | 0 |
| Case 98 | 11 | 193,146     | 1,015,915   | 1 | 1 | 2 | 0 |
| Case 98 | 11 | 1,016,238   | 1,019,413   | 2 | 1 | 3 | 0 |
| Case 98 | 11 | 1,020,722   | 1,418,450   | 1 | 1 | 2 | 0 |
| Case 98 | 11 | 1,418,877   | 1,672,567   | 2 | 0 | 2 | 1 |
| Case 98 | 11 | 1,673,636   | 2,187,275   | 1 | 1 | 2 | 0 |
| Case 98 | 11 | 2,188,166   | 2,281,501   | 2 | 0 | 2 | 1 |
| Case 98 | 11 | 2,282,360   | 5,758,012   | 1 | 1 | 2 | 0 |
| Case 98 | 11 | 5,758,051   | 5,878,523   | 2 | 0 | 2 | 1 |
| Case 98 | 11 | 5,878,551   | 6,807,041   | 1 | 1 | 2 | 0 |
| Case 98 | 11 | 6,807,052   | 6,913,244   | 2 | 0 | 2 | 1 |
| Case 98 | 11 | 6,913,250   | 7,257,141   | 1 | 1 | 2 | 0 |
| Case 98 | 11 | 7,257,474   | 7,397,799   | 2 | 0 | 2 | 1 |
| Case 98 | 11 | 7,398,961   | 19,451,020  | 1 | 1 | 2 | 0 |
| Case 98 | 11 | 19,452,223  | 19,538,163  | 2 | 0 | 2 | 1 |
| Case 98 | 11 | 19,538,185  | 20,188,883  | 1 | 1 | 2 | 0 |
| Case 98 | 11 | 20,191,933  | 20,337,341  | 2 | 0 | 2 | 1 |
| Case 98 | 11 | 20,339,381  | 20,378,124  | 1 | 1 | 2 | 0 |
| Case 98 | 11 | 20,383,324  | 20,730,761  | 2 | 0 | 2 | 1 |
| Case 98 | 11 | 20,736,800  | 25,835,890  | 1 | 1 | 2 | 0 |
| Case 98 | 11 | 25,837,926  | 26,041,706  | 2 | 0 | 2 | 1 |
| Case 98 | 11 | 26,041,936  | 37,153,829  | 1 | 1 | 2 | 0 |
| Case 98 | 11 | 37,154,319  | 37,573,427  | 2 | 0 | 2 | 1 |
| Case 98 | 11 | 37,577,216  | 39,709,068  | 1 | 1 | 2 | 0 |
| Case 98 | 11 | 39,717,326  | 40,071,723  | 2 | 0 | 2 | 1 |
| Case 98 | 11 | 40,073,820  | 40,989,912  | 1 | 1 | 2 | 0 |
| Case 98 | 11 | 40,993,375  | 41,100,409  | 2 | 0 | 2 | 1 |
| Case 98 | 11 | 41,103,092  | 48,058,313  | 1 | 1 | 2 | 0 |
| Case 98 | 11 | 48,066,048  | 51,591,253  | 2 | 0 | 2 | 1 |
| Case 98 | 11 | 54,794,237  | 55,681,277  | 2 | 0 | 2 | 1 |
| Case 98 | 11 | 55,681,336  | 57,292,916  | 1 | 1 | 2 | 0 |
| Case 98 | 11 | 57,295,864  | 58,377,801  | 2 | 0 | 2 | 1 |
| Case 98 | 11 | 58,378,422  | 60,230,577  | 1 | 1 | 2 | 0 |
| Case 98 | 11 | 60,231,809  | 60,362,261  | 2 | 0 | 2 | 1 |
| Case 98 | 11 | 60,363,961  | 60,557,840  | 1 | 1 | 2 | 0 |
| Case 98 | 11 | 60,558,322  | 60,776,209  | 2 | 0 | 2 | 1 |
| Case 98 | 11 | 60,777,045  | 71,850,152  | 1 | 1 | 2 | 0 |
| Case 98 | 11 | 71,850,194  | 72,196,620  | 2 | 0 | 2 | 1 |

|         |    |             |             |   |   |   |   |
|---------|----|-------------|-------------|---|---|---|---|
| Case 98 | 11 | 72,197,635  | 75,274,687  | 1 | 1 | 2 | 0 |
| Case 98 | 11 | 75,276,178  | 75,833,980  | 2 | 0 | 2 | 1 |
| Case 98 | 11 | 75,837,669  | 75,890,695  | 1 | 1 | 2 | 0 |
| Case 98 | 11 | 75,892,741  | 76,253,389  | 2 | 0 | 2 | 1 |
| Case 98 | 11 | 76,255,312  | 78,164,984  | 1 | 1 | 2 | 0 |
| Case 98 | 11 | 78,170,811  | 78,381,505  | 2 | 0 | 2 | 1 |
| Case 98 | 11 | 78,381,581  | 82,134,233  | 1 | 1 | 2 | 0 |
| Case 98 | 11 | 82,135,969  | 82,879,892  | 2 | 0 | 2 | 1 |
| Case 98 | 11 | 82,879,960  | 85,518,123  | 1 | 1 | 2 | 0 |
| Case 98 | 11 | 85,526,399  | 85,893,436  | 2 | 0 | 2 | 1 |
| Case 98 | 11 | 85,900,117  | 87,939,593  | 1 | 1 | 2 | 0 |
| Case 98 | 11 | 87,940,173  | 88,090,476  | 2 | 0 | 2 | 1 |
| Case 98 | 11 | 88,093,710  | 88,289,360  | 1 | 1 | 2 | 0 |
| Case 98 | 11 | 88,299,284  | 88,669,352  | 2 | 0 | 2 | 1 |
| Case 98 | 11 | 88,676,854  | 102,668,882 | 1 | 1 | 2 | 0 |
| Case 98 | 11 | 102,669,230 | 102,803,476 | 2 | 0 | 2 | 1 |
| Case 98 | 11 | 102,803,586 | 107,049,547 | 1 | 1 | 2 | 0 |
| Case 98 | 11 | 107,053,192 | 107,125,357 | 2 | 0 | 2 | 1 |
| Case 98 | 11 | 107,127,162 | 114,577,518 | 1 | 1 | 2 | 0 |
| Case 98 | 11 | 114,577,539 | 114,914,107 | 2 | 0 | 2 | 1 |
| Case 98 | 11 | 114,915,469 | 116,972,935 | 1 | 1 | 2 | 0 |
| Case 98 | 11 | 116,973,929 | 117,199,870 | 2 | 0 | 2 | 1 |
| Case 98 | 11 | 117,201,682 | 123,926,106 | 1 | 1 | 2 | 0 |
| Case 98 | 11 | 123,938,580 | 124,293,198 | 2 | 0 | 2 | 1 |
| Case 98 | 11 | 124,293,857 | 126,229,456 | 1 | 1 | 2 | 0 |
| Case 98 | 11 | 126,242,697 | 126,283,542 | 2 | 0 | 2 | 1 |
| Case 98 | 11 | 126,283,899 | 130,088,828 | 1 | 1 | 2 | 0 |
| Case 98 | 11 | 130,089,026 | 130,214,257 | 2 | 0 | 2 | 1 |
| Case 98 | 11 | 130,218,499 | 134,934,063 | 1 | 1 | 2 | 0 |
| Case 98 | 12 | 191,619     | 10,089,737  | 1 | 1 | 2 | 0 |
| Case 98 | 12 | 10,091,682  | 10,170,727  | 2 | 0 | 2 | 1 |
| Case 98 | 12 | 10,171,039  | 10,666,025  | 1 | 1 | 2 | 0 |
| Case 98 | 12 | 10,680,216  | 10,834,865  | 2 | 0 | 2 | 1 |
| Case 98 | 12 | 10,837,542  | 10,954,919  | 1 | 1 | 2 | 0 |
| Case 98 | 12 | 10,954,989  | 11,652,829  | 2 | 0 | 2 | 1 |
| Case 98 | 12 | 11,656,621  | 17,889,729  | 1 | 1 | 2 | 0 |
| Case 98 | 12 | 17,903,344  | 18,658,248  | 2 | 0 | 2 | 1 |
| Case 98 | 12 | 18,663,922  | 20,786,685  | 1 | 1 | 2 | 0 |
| Case 98 | 12 | 20,786,703  | 21,353,505  | 2 | 0 | 2 | 1 |
| Case 98 | 12 | 21,353,551  | 27,027,201  | 1 | 1 | 2 | 0 |
| Case 98 | 12 | 27,027,742  | 27,523,403  | 2 | 0 | 2 | 1 |
| Case 98 | 12 | 27,524,824  | 32,713,919  | 1 | 1 | 2 | 0 |
| Case 98 | 12 | 32,719,928  | 33,062,023  | 2 | 0 | 2 | 1 |
| Case 98 | 12 | 33,064,825  | 34,853,011  | 1 | 1 | 2 | 0 |
| Case 98 | 12 | 37,876,400  | 44,298,417  | 1 | 1 | 2 | 0 |
| Case 98 | 12 | 44,317,599  | 45,149,301  | 2 | 0 | 2 | 1 |
| Case 98 | 12 | 45,152,546  | 46,039,883  | 1 | 1 | 2 | 0 |
| Case 98 | 12 | 46,043,181  | 46,591,906  | 2 | 0 | 2 | 1 |
| Case 98 | 12 | 46,600,617  | 49,723,191  | 1 | 1 | 2 | 0 |
| Case 98 | 12 | 49,723,581  | 50,232,608  | 2 | 0 | 2 | 1 |
| Case 98 | 12 | 50,232,719  | 54,176,868  | 1 | 1 | 2 | 0 |
| Case 98 | 12 | 54,185,879  | 54,471,280  | 2 | 0 | 2 | 1 |
| Case 98 | 12 | 54,505,656  | 56,427,034  | 1 | 1 | 2 | 0 |
| Case 98 | 12 | 56,428,356  | 56,876,372  | 2 | 0 | 2 | 1 |
| Case 98 | 12 | 56,879,548  | 63,722,899  | 1 | 1 | 2 | 0 |
| Case 98 | 12 | 63,739,361  | 63,901,150  | 2 | 0 | 2 | 1 |
| Case 98 | 12 | 63,905,515  | 65,348,920  | 1 | 1 | 2 | 0 |
| Case 98 | 12 | 65,352,621  | 65,901,140  | 2 | 0 | 2 | 1 |
| Case 98 | 12 | 65,910,217  | 66,991,477  | 1 | 1 | 2 | 0 |
| Case 98 | 12 | 66,992,513  | 67,165,630  | 2 | 0 | 2 | 1 |
| Case 98 | 12 | 67,169,731  | 70,032,962  | 1 | 1 | 2 | 0 |

|         |    |             |             |   |   |   |   |
|---------|----|-------------|-------------|---|---|---|---|
| Case 98 | 12 | 70,038,508  | 70,421,228  | 2 | 0 | 2 | 1 |
| Case 98 | 12 | 70,422,605  | 71,843,374  | 1 | 1 | 2 | 0 |
| Case 98 | 12 | 71,849,276  | 72,425,040  | 2 | 0 | 2 | 1 |
| Case 98 | 12 | 72,425,419  | 73,629,656  | 1 | 1 | 2 | 0 |
| Case 98 | 12 | 73,636,521  | 74,837,984  | 2 | 0 | 2 | 1 |
| Case 98 | 12 | 74,843,754  | 76,644,132  | 1 | 1 | 2 | 0 |
| Case 98 | 12 | 76,649,903  | 77,116,145  | 2 | 0 | 2 | 1 |
| Case 98 | 12 | 77,136,919  | 78,032,818  | 1 | 1 | 2 | 0 |
| Case 98 | 12 | 78,035,461  | 78,474,971  | 2 | 0 | 2 | 1 |
| Case 98 | 12 | 78,475,583  | 96,168,405  | 1 | 1 | 2 | 0 |
| Case 98 | 12 | 96,175,464  | 96,356,152  | 2 | 0 | 2 | 1 |
| Case 98 | 12 | 96,356,191  | 98,778,436  | 1 | 1 | 2 | 0 |
| Case 98 | 12 | 98,780,167  | 98,982,066  | 2 | 0 | 2 | 1 |
| Case 98 | 12 | 98,983,214  | 114,060,096 | 1 | 1 | 2 | 0 |
| Case 98 | 12 | 114,064,033 | 114,169,592 | 2 | 0 | 2 | 1 |
| Case 98 | 12 | 114,174,076 | 114,860,501 | 1 | 1 | 2 | 0 |
| Case 98 | 12 | 114,860,659 | 115,060,246 | 2 | 0 | 2 | 1 |
| Case 98 | 12 | 115,079,592 | 118,230,821 | 1 | 1 | 2 | 0 |
| Case 98 | 12 | 118,234,080 | 118,464,688 | 2 | 0 | 2 | 1 |
| Case 98 | 12 | 118,465,820 | 123,956,904 | 1 | 1 | 2 | 0 |
| Case 98 | 12 | 123,957,640 | 124,646,406 | 2 | 0 | 2 | 1 |
| Case 98 | 12 | 124,646,827 | 127,210,808 | 1 | 1 | 2 | 0 |
| Case 98 | 12 | 127,211,045 | 127,430,069 | 2 | 0 | 2 | 1 |
| Case 98 | 12 | 127,439,979 | 128,546,979 | 1 | 1 | 2 | 0 |
| Case 98 | 12 | 128,547,161 | 128,571,048 | 2 | 0 | 2 | 1 |
| Case 98 | 12 | 128,571,258 | 129,967,036 | 1 | 1 | 2 | 0 |
| Case 98 | 12 | 129,968,143 | 130,149,266 | 2 | 0 | 2 | 1 |
| Case 98 | 12 | 130,151,190 | 131,466,562 | 1 | 1 | 2 | 0 |
| Case 98 | 12 | 131,467,634 | 131,598,584 | 2 | 0 | 2 | 1 |
| Case 98 | 12 | 131,600,346 | 133,343,554 | 1 | 1 | 2 | 0 |
| Case 98 | 12 | 133,343,594 | 133,810,935 | 2 | 0 | 2 | 1 |
| Case 98 | 13 | 19,058,717  | 19,714,111  | 1 | 1 | 2 | 0 |
| Case 98 | 13 | 19,714,717  | 20,425,911  | 2 | 0 | 2 | 1 |
| Case 98 | 13 | 20,425,948  | 24,432,467  | 1 | 1 | 2 | 0 |
| Case 98 | 13 | 24,433,009  | 24,474,613  | 2 | 0 | 2 | 1 |
| Case 98 | 13 | 24,476,073  | 25,444,744  | 1 | 1 | 2 | 0 |
| Case 98 | 13 | 25,444,818  | 25,571,233  | 2 | 0 | 2 | 1 |
| Case 98 | 13 | 25,573,308  | 32,095,732  | 1 | 1 | 2 | 0 |
| Case 98 | 13 | 32,097,472  | 32,528,958  | 2 | 0 | 2 | 1 |
| Case 98 | 13 | 32,545,856  | 35,430,680  | 1 | 1 | 2 | 0 |
| Case 98 | 13 | 35,431,376  | 36,278,753  | 2 | 0 | 2 | 1 |
| Case 98 | 13 | 36,279,556  | 37,585,665  | 1 | 1 | 2 | 0 |
| Case 98 | 13 | 37,586,427  | 37,954,091  | 2 | 0 | 2 | 1 |
| Case 98 | 13 | 37,957,009  | 38,670,647  | 1 | 1 | 2 | 0 |
| Case 98 | 13 | 38,672,455  | 38,832,645  | 2 | 0 | 2 | 1 |
| Case 98 | 13 | 38,836,680  | 39,032,582  | 1 | 1 | 2 | 0 |
| Case 98 | 13 | 39,032,599  | 39,468,958  | 2 | 0 | 2 | 1 |
| Case 98 | 13 | 39,470,642  | 44,842,503  | 1 | 1 | 2 | 0 |
| Case 98 | 13 | 44,845,243  | 45,148,257  | 2 | 0 | 2 | 1 |
| Case 98 | 13 | 45,148,657  | 53,356,397  | 1 | 1 | 2 | 0 |
| Case 98 | 13 | 53,357,729  | 53,509,424  | 2 | 0 | 2 | 1 |
| Case 98 | 13 | 53,509,457  | 53,602,462  | 1 | 1 | 2 | 0 |
| Case 98 | 13 | 53,602,970  | 55,020,068  | 2 | 0 | 2 | 1 |
| Case 98 | 13 | 55,033,079  | 63,235,364  | 1 | 1 | 2 | 0 |
| Case 98 | 13 | 63,237,821  | 64,613,437  | 2 | 0 | 2 | 1 |
| Case 98 | 13 | 64,617,871  | 65,414,914  | 1 | 1 | 2 | 0 |
| Case 98 | 13 | 65,421,829  | 66,114,004  | 2 | 0 | 2 | 1 |
| Case 98 | 13 | 66,120,566  | 69,383,059  | 1 | 1 | 2 | 0 |
| Case 98 | 13 | 69,384,803  | 70,334,143  | 2 | 0 | 2 | 1 |
| Case 98 | 13 | 70,342,292  | 70,487,282  | 1 | 1 | 2 | 0 |
| Case 98 | 13 | 70,487,437  | 70,724,107  | 2 | 0 | 2 | 1 |

|         |    |             |             |   |   |   |   |
|---------|----|-------------|-------------|---|---|---|---|
| Case 98 | 13 | 70,724,421  | 74,098,915  | 1 | 1 | 2 | 0 |
| Case 98 | 13 | 74,100,036  | 74,308,229  | 2 | 0 | 2 | 1 |
| Case 98 | 13 | 74,311,737  | 74,758,886  | 1 | 1 | 2 | 0 |
| Case 98 | 13 | 74,761,700  | 75,024,156  | 2 | 0 | 2 | 1 |
| Case 98 | 13 | 75,024,613  | 82,254,472  | 1 | 1 | 2 | 0 |
| Case 98 | 13 | 82,257,820  | 82,649,433  | 2 | 0 | 2 | 1 |
| Case 98 | 13 | 82,649,816  | 84,103,707  | 1 | 1 | 2 | 0 |
| Case 98 | 13 | 84,111,773  | 84,312,747  | 2 | 0 | 2 | 1 |
| Case 98 | 13 | 84,318,039  | 85,037,047  | 1 | 1 | 2 | 0 |
| Case 98 | 13 | 85,040,002  | 85,114,311  | 2 | 0 | 2 | 1 |
| Case 98 | 13 | 85,125,778  | 95,689,942  | 1 | 1 | 2 | 0 |
| Case 98 | 13 | 95,690,960  | 95,779,969  | 2 | 0 | 2 | 1 |
| Case 98 | 13 | 95,783,500  | 95,860,574  | 1 | 1 | 2 | 0 |
| Case 98 | 13 | 95,861,242  | 95,894,315  | 2 | 0 | 2 | 1 |
| Case 98 | 13 | 95,894,329  | 99,098,962  | 1 | 1 | 2 | 0 |
| Case 98 | 13 | 99,099,021  | 99,245,866  | 2 | 0 | 2 | 1 |
| Case 98 | 13 | 99,246,215  | 101,401,197 | 1 | 1 | 2 | 0 |
| Case 98 | 13 | 101,401,990 | 101,508,242 | 2 | 0 | 2 | 1 |
| Case 98 | 13 | 101,508,809 | 104,562,936 | 1 | 1 | 2 | 0 |
| Case 98 | 13 | 104,563,022 | 104,728,275 | 2 | 0 | 2 | 1 |
| Case 98 | 13 | 104,735,744 | 105,274,922 | 1 | 1 | 2 | 0 |
| Case 98 | 13 | 105,275,930 | 105,588,931 | 2 | 0 | 2 | 1 |
| Case 98 | 13 | 105,589,982 | 106,909,000 | 1 | 1 | 2 | 0 |
| Case 98 | 13 | 106,913,330 | 107,126,216 | 2 | 0 | 2 | 1 |
| Case 98 | 13 | 107,127,784 | 115,103,529 | 1 | 1 | 2 | 0 |
| Case 98 | 14 | 19,280,733  | 24,533,473  | 1 | 1 | 2 | 0 |
| Case 98 | 14 | 24,533,474  | 24,728,294  | 2 | 0 | 2 | 1 |
| Case 98 | 14 | 24,728,326  | 24,906,515  | 1 | 1 | 2 | 0 |
| Case 98 | 14 | 24,907,288  | 24,976,561  | 2 | 0 | 2 | 1 |
| Case 98 | 14 | 24,976,574  | 26,941,566  | 1 | 1 | 2 | 0 |
| Case 98 | 14 | 26,945,366  | 27,266,981  | 2 | 0 | 2 | 1 |
| Case 98 | 14 | 27,270,848  | 35,371,697  | 1 | 1 | 2 | 0 |
| Case 98 | 14 | 35,376,082  | 35,860,074  | 2 | 0 | 2 | 1 |
| Case 98 | 14 | 35,862,404  | 37,387,006  | 1 | 1 | 2 | 0 |
| Case 98 | 14 | 37,389,296  | 38,061,742  | 2 | 0 | 2 | 1 |
| Case 98 | 14 | 38,061,795  | 39,690,854  | 1 | 1 | 2 | 0 |
| Case 98 | 14 | 39,693,018  | 40,183,285  | 2 | 0 | 2 | 1 |
| Case 98 | 14 | 40,186,667  | 45,035,016  | 1 | 1 | 2 | 0 |
| Case 98 | 14 | 45,043,928  | 45,214,574  | 2 | 0 | 2 | 1 |
| Case 98 | 14 | 45,225,953  | 45,403,459  | 1 | 1 | 2 | 0 |
| Case 98 | 14 | 45,403,679  | 45,932,515  | 2 | 0 | 2 | 1 |
| Case 98 | 14 | 45,962,391  | 52,378,020  | 1 | 1 | 2 | 0 |
| Case 98 | 14 | 52,380,187  | 52,600,254  | 2 | 0 | 2 | 1 |
| Case 98 | 14 | 52,605,144  | 55,188,149  | 1 | 1 | 2 | 0 |
| Case 98 | 14 | 55,190,709  | 57,024,251  | 2 | 0 | 2 | 1 |
| Case 98 | 14 | 57,027,793  | 58,448,681  | 1 | 1 | 2 | 0 |
| Case 98 | 14 | 58,452,416  | 58,552,535  | 2 | 0 | 2 | 1 |
| Case 98 | 14 | 58,560,475  | 59,115,448  | 1 | 1 | 2 | 0 |
| Case 98 | 14 | 59,123,780  | 59,231,914  | 2 | 0 | 2 | 1 |
| Case 98 | 14 | 59,232,691  | 59,862,624  | 1 | 1 | 2 | 0 |
| Case 98 | 14 | 59,862,824  | 60,075,644  | 2 | 0 | 2 | 1 |
| Case 98 | 14 | 60,087,380  | 68,105,557  | 1 | 1 | 2 | 0 |
| Case 98 | 14 | 68,110,737  | 68,808,398  | 2 | 0 | 2 | 1 |
| Case 98 | 14 | 68,817,413  | 74,477,488  | 1 | 1 | 2 | 0 |
| Case 98 | 14 | 74,482,984  | 74,824,348  | 2 | 0 | 2 | 1 |
| Case 98 | 14 | 74,824,411  | 80,161,440  | 1 | 1 | 2 | 0 |
| Case 98 | 14 | 80,162,439  | 80,266,523  | 2 | 0 | 2 | 1 |
| Case 98 | 14 | 80,266,878  | 85,138,430  | 1 | 1 | 2 | 0 |
| Case 98 | 14 | 85,148,641  | 85,271,240  | 2 | 0 | 2 | 1 |
| Case 98 | 14 | 85,275,113  | 103,822,285 | 1 | 1 | 2 | 0 |
| Case 98 | 14 | 103,822,912 | 104,095,320 | 2 | 0 | 2 | 1 |



|         |    |             |             |   |   |   |   |
|---------|----|-------------|-------------|---|---|---|---|
| Case 98 | 14 | 104,096,558 | 104,359,121 | 1 | 1 | 2 | 0 |
| Case 98 | 14 | 104,363,322 | 104,624,155 | 2 | 0 | 2 | 1 |
| Case 98 | 14 | 104,624,228 | 105,178,852 | 1 | 1 | 2 | 0 |
| Case 98 | 14 | 105,179,184 | 105,267,925 | 2 | 0 | 2 | 1 |
| Case 98 | 14 | 105,267,934 | 107,287,663 | 1 | 1 | 2 | 0 |
| Case 98 | 15 | 20,034,919  | 24,106,808  | 1 | 1 | 2 | 0 |
| Case 98 | 15 | 24,112,281  | 24,227,585  | 2 | 0 | 2 | 1 |
| Case 98 | 15 | 24,230,707  | 30,232,984  | 1 | 1 | 2 | 0 |
| Case 98 | 15 | 30,238,158  | 31,449,628  | 2 | 0 | 2 | 1 |
| Case 98 | 15 | 31,451,498  | 40,179,013  | 1 | 1 | 2 | 0 |
| Case 98 | 15 | 40,192,918  | 40,379,260  | 2 | 0 | 2 | 1 |
| Case 98 | 15 | 40,382,441  | 42,967,124  | 1 | 1 | 2 | 0 |
| Case 98 | 15 | 42,967,130  | 43,816,904  | 2 | 0 | 2 | 1 |
| Case 98 | 15 | 43,816,905  | 45,490,974  | 1 | 1 | 2 | 0 |
| Case 98 | 15 | 45,490,988  | 46,337,445  | 2 | 1 | 3 | 0 |
| Case 98 | 15 | 46,345,687  | 63,699,995  | 1 | 1 | 2 | 0 |
| Case 98 | 15 | 63,705,031  | 65,491,339  | 2 | 0 | 2 | 1 |
| Case 98 | 15 | 65,491,389  | 67,414,425  | 1 | 1 | 2 | 0 |
| Case 98 | 15 | 67,418,205  | 68,302,144  | 2 | 0 | 2 | 1 |
| Case 98 | 15 | 68,306,447  | 74,256,407  | 1 | 1 | 2 | 0 |
| Case 98 | 15 | 74,258,449  | 75,424,593  | 2 | 0 | 2 | 1 |
| Case 98 | 15 | 75,435,790  | 79,749,415  | 1 | 1 | 2 | 0 |
| Case 98 | 15 | 79,749,447  | 79,990,774  | 2 | 0 | 2 | 1 |
| Case 98 | 15 | 79,993,661  | 84,611,494  | 1 | 1 | 2 | 0 |
| Case 98 | 15 | 84,611,785  | 85,400,115  | 2 | 0 | 2 | 1 |
| Case 98 | 15 | 85,400,146  | 85,833,638  | 1 | 1 | 2 | 0 |
| Case 98 | 15 | 85,835,658  | 86,343,458  | 2 | 0 | 2 | 1 |
| Case 98 | 15 | 86,344,912  | 87,461,684  | 1 | 1 | 2 | 0 |
| Case 98 | 15 | 87,461,937  | 87,685,685  | 2 | 0 | 2 | 1 |
| Case 98 | 15 | 87,688,475  | 90,069,508  | 1 | 1 | 2 | 0 |
| Case 98 | 15 | 90,071,734  | 90,226,947  | 2 | 0 | 2 | 1 |
| Case 98 | 15 | 90,227,074  | 100,258,980 | 1 | 1 | 2 | 0 |
| Case 98 | 15 | 100,263,499 | 100,453,990 | 2 | 0 | 2 | 1 |
| Case 98 | 15 | 100,456,631 | 102,461,162 | 1 | 1 | 2 | 0 |
| Case 98 | 16 | 88,165      | 215,379     | 1 | 1 | 2 | 0 |
| Case 98 | 16 | 216,075     | 426,768     | 2 | 0 | 2 | 1 |
| Case 98 | 16 | 427,062     | 3,406,516   | 1 | 1 | 2 | 0 |
| Case 98 | 16 | 3,406,643   | 3,542,444   | 2 | 0 | 2 | 1 |
| Case 98 | 16 | 3,543,820   | 4,431,470   | 1 | 1 | 2 | 0 |
| Case 98 | 16 | 4,431,767   | 4,802,420   | 2 | 0 | 2 | 1 |
| Case 98 | 16 | 4,802,423   | 5,003,326   | 1 | 1 | 2 | 0 |
| Case 98 | 16 | 5,007,708   | 5,226,917   | 2 | 0 | 2 | 1 |
| Case 98 | 16 | 5,231,188   | 5,791,541   | 1 | 1 | 2 | 0 |
| Case 98 | 16 | 5,793,163   | 5,874,274   | 2 | 0 | 2 | 1 |
| Case 98 | 16 | 5,874,639   | 31,215,983  | 1 | 1 | 2 | 0 |
| Case 98 | 16 | 31,220,869  | 31,860,399  | 2 | 0 | 2 | 1 |
| Case 98 | 16 | 31,860,760  | 35,285,582  | 1 | 1 | 2 | 0 |
| Case 98 | 16 | 46,450,037  | 52,301,822  | 1 | 1 | 2 | 0 |
| Case 98 | 16 | 52,310,527  | 53,536,345  | 2 | 0 | 2 | 1 |
| Case 98 | 16 | 53,537,423  | 53,850,170  | 1 | 1 | 2 | 0 |
| Case 98 | 16 | 53,850,868  | 53,956,052  | 2 | 0 | 2 | 1 |
| Case 98 | 16 | 53,961,354  | 54,025,172  | 1 | 1 | 2 | 0 |
| Case 98 | 16 | 54,026,739  | 54,206,026  | 2 | 0 | 2 | 1 |
| Case 98 | 16 | 54,208,856  | 60,136,254  | 1 | 1 | 2 | 0 |
| Case 98 | 16 | 60,146,143  | 60,545,731  | 2 | 0 | 2 | 1 |
| Case 98 | 16 | 60,564,088  | 74,366,251  | 1 | 1 | 2 | 0 |
| Case 98 | 16 | 74,394,575  | 74,708,858  | 2 | 0 | 2 | 1 |
| Case 98 | 16 | 74,708,900  | 75,531,769  | 1 | 1 | 2 | 0 |
| Case 98 | 16 | 75,532,044  | 75,922,170  | 2 | 0 | 2 | 1 |
| Case 98 | 16 | 75,924,274  | 80,961,660  | 1 | 1 | 2 | 0 |
| Case 98 | 16 | 80,964,406  | 81,124,216  | 2 | 0 | 2 | 1 |

|         |    |            |            |   |   |   |   |
|---------|----|------------|------------|---|---|---|---|
| Case 98 | 16 | 81,124,275 | 83,983,083 | 1 | 1 | 2 | 0 |
| Case 98 | 16 | 83,983,086 | 84,031,722 | 2 | 0 | 2 | 1 |
| Case 98 | 16 | 84,031,884 | 84,067,023 | 1 | 1 | 2 | 0 |
| Case 98 | 16 | 84,067,054 | 84,230,300 | 2 | 0 | 2 | 1 |
| Case 98 | 16 | 84,230,332 | 90,274,695 | 1 | 1 | 2 | 0 |
| Case 98 | 17 | 11,885     | 1,204,291  | 1 | 1 | 2 | 0 |
| Case 98 | 17 | 1,204,412  | 1,352,701  | 2 | 0 | 2 | 1 |
| Case 98 | 17 | 1,355,551  | 1,383,868  | 1 | 1 | 2 | 0 |
| Case 98 | 17 | 1,383,893  | 1,564,292  | 2 | 0 | 2 | 1 |
| Case 98 | 17 | 1,567,689  | 3,458,072  | 1 | 1 | 2 | 0 |
| Case 98 | 17 | 3,459,132  | 3,689,132  | 2 | 0 | 2 | 1 |
| Case 98 | 17 | 3,689,826  | 7,127,674  | 1 | 1 | 2 | 0 |
| Case 98 | 17 | 7,127,698  | 7,259,169  | 2 | 0 | 2 | 1 |
| Case 98 | 17 | 7,259,183  | 21,415,061 | 1 | 1 | 2 | 0 |
| Case 98 | 17 | 21,420,127 | 22,242,355 | 2 | 0 | 2 | 1 |
| Case 98 | 17 | 25,268,142 | 25,861,528 | 2 | 0 | 2 | 1 |
| Case 98 | 17 | 25,865,588 | 34,436,708 | 1 | 1 | 2 | 0 |
| Case 98 | 17 | 34,443,811 | 34,597,521 | 2 | 1 | 3 | 0 |
| Case 98 | 17 | 34,815,551 | 37,830,900 | 1 | 1 | 2 | 0 |
| Case 98 | 17 | 37,831,035 | 38,182,844 | 2 | 0 | 2 | 1 |
| Case 98 | 17 | 38,183,643 | 39,122,852 | 1 | 1 | 2 | 0 |
| Case 98 | 17 | 39,122,939 | 39,531,402 | 2 | 0 | 2 | 1 |
| Case 98 | 17 | 39,533,097 | 44,952,721 | 1 | 1 | 2 | 0 |
| Case 98 | 17 | 44,953,675 | 45,188,090 | 2 | 0 | 2 | 1 |
| Case 98 | 17 | 45,194,762 | 48,380,383 | 1 | 1 | 2 | 0 |
| Case 98 | 17 | 48,384,501 | 48,678,412 | 2 | 0 | 2 | 1 |
| Case 98 | 17 | 48,683,415 | 57,050,215 | 1 | 1 | 2 | 0 |
| Case 98 | 17 | 57,050,365 | 57,424,645 | 2 | 0 | 2 | 1 |
| Case 98 | 17 | 57,424,912 | 57,638,015 | 1 | 1 | 2 | 0 |
| Case 98 | 17 | 57,641,506 | 58,121,348 | 2 | 0 | 2 | 1 |
| Case 98 | 17 | 58,121,453 | 61,574,215 | 1 | 1 | 2 | 0 |
| Case 98 | 17 | 61,574,662 | 62,045,401 | 2 | 0 | 2 | 1 |
| Case 98 | 17 | 62,045,451 | 67,117,688 | 1 | 1 | 2 | 0 |
| Case 98 | 17 | 67,119,548 | 67,235,705 | 2 | 0 | 2 | 1 |
| Case 98 | 17 | 67,237,750 | 69,063,533 | 1 | 1 | 2 | 0 |
| Case 98 | 17 | 69,064,550 | 69,244,324 | 2 | 0 | 2 | 1 |
| Case 98 | 17 | 69,244,731 | 72,023,478 | 1 | 1 | 2 | 0 |
| Case 98 | 17 | 72,031,082 | 72,047,777 | 2 | 0 | 2 | 1 |
| Case 98 | 17 | 72,050,789 | 73,724,490 | 1 | 1 | 2 | 0 |
| Case 98 | 17 | 73,725,378 | 73,955,257 | 2 | 0 | 2 | 1 |
| Case 98 | 17 | 73,955,565 | 79,914,920 | 1 | 1 | 2 | 0 |
| Case 98 | 17 | 79,915,035 | 80,439,907 | 2 | 0 | 2 | 1 |
| Case 98 | 17 | 80,442,722 | 81,060,040 | 1 | 1 | 2 | 0 |
| Case 98 | 18 | 87,505     | 15,375,878 | 1 | 1 | 2 | 0 |
| Case 98 | 18 | 18,520,354 | 22,135,828 | 1 | 1 | 2 | 0 |
| Case 98 | 18 | 22,136,830 | 22,467,235 | 2 | 0 | 2 | 1 |
| Case 98 | 18 | 22,467,812 | 23,096,345 | 1 | 1 | 2 | 0 |
| Case 98 | 18 | 23,100,817 | 23,305,715 | 2 | 0 | 2 | 1 |
| Case 98 | 18 | 23,307,761 | 26,119,765 | 1 | 1 | 2 | 0 |
| Case 98 | 18 | 26,120,683 | 26,438,855 | 2 | 0 | 2 | 1 |
| Case 98 | 18 | 26,442,506 | 28,935,073 | 1 | 1 | 2 | 0 |
| Case 98 | 18 | 28,935,092 | 29,054,330 | 2 | 0 | 2 | 1 |
| Case 98 | 18 | 29,055,636 | 30,983,915 | 1 | 1 | 2 | 0 |
| Case 98 | 18 | 30,989,904 | 31,424,697 | 2 | 0 | 2 | 1 |
| Case 98 | 18 | 31,426,113 | 32,618,893 | 1 | 1 | 2 | 0 |
| Case 98 | 18 | 32,623,344 | 32,971,035 | 2 | 0 | 2 | 1 |
| Case 98 | 18 | 32,971,211 | 42,612,091 | 1 | 1 | 2 | 0 |
| Case 98 | 18 | 42,614,858 | 42,899,939 | 2 | 0 | 2 | 1 |
| Case 98 | 18 | 42,907,457 | 43,026,446 | 1 | 1 | 2 | 0 |
| Case 98 | 18 | 43,028,119 | 43,234,904 | 2 | 0 | 2 | 1 |
| Case 98 | 18 | 43,235,882 | 47,159,917 | 1 | 1 | 2 | 0 |

|         |    |            |            |   |   |   |   |
|---------|----|------------|------------|---|---|---|---|
| Case 98 | 18 | 47,160,953 | 47,162,207 | 1 | 0 | 1 | 0 |
| Case 98 | 18 | 47,166,098 | 57,131,794 | 1 | 1 | 2 | 0 |
| Case 98 | 18 | 57,131,948 | 57,331,658 | 2 | 0 | 2 | 1 |
| Case 98 | 18 | 57,334,592 | 57,570,333 | 1 | 1 | 2 | 0 |
| Case 98 | 18 | 57,570,528 | 57,974,920 | 2 | 0 | 2 | 1 |
| Case 98 | 18 | 57,984,175 | 59,584,897 | 1 | 1 | 2 | 0 |
| Case 98 | 18 | 59,585,959 | 60,021,504 | 2 | 0 | 2 | 1 |
| Case 98 | 18 | 60,021,723 | 75,326,389 | 1 | 1 | 2 | 0 |
| Case 98 | 18 | 75,331,597 | 75,453,275 | 2 | 0 | 2 | 1 |
| Case 98 | 18 | 75,454,829 | 77,438,688 | 1 | 1 | 2 | 0 |
| Case 98 | 18 | 77,441,442 | 77,526,471 | 2 | 0 | 2 | 1 |
| Case 98 | 18 | 77,533,618 | 78,015,180 | 1 | 1 | 2 | 0 |
| Case 98 | 19 | 260,912    | 2,808,399  | 1 | 1 | 2 | 0 |
| Case 98 | 19 | 2,810,327  | 2,905,913  | 2 | 0 | 2 | 1 |
| Case 98 | 19 | 2,906,475  | 8,156,358  | 1 | 1 | 2 | 0 |
| Case 98 | 19 | 8,156,366  | 8,281,635  | 2 | 0 | 2 | 1 |
| Case 98 | 19 | 8,285,607  | 10,335,053 | 1 | 1 | 2 | 0 |
| Case 98 | 19 | 10,335,403 | 10,472,452 | 2 | 0 | 2 | 1 |
| Case 98 | 19 | 10,472,586 | 15,852,872 | 1 | 1 | 2 | 0 |
| Case 98 | 19 | 15,852,908 | 15,905,016 | 2 | 0 | 2 | 1 |
| Case 98 | 19 | 15,905,357 | 18,507,074 | 1 | 1 | 2 | 0 |
| Case 98 | 19 | 18,507,105 | 18,895,726 | 2 | 0 | 2 | 1 |
| Case 98 | 19 | 18,895,749 | 22,075,704 | 1 | 1 | 2 | 0 |
| Case 98 | 19 | 22,075,780 | 22,729,582 | 2 | 0 | 2 | 1 |
| Case 98 | 19 | 22,729,653 | 24,067,348 | 1 | 1 | 2 | 0 |
| Case 98 | 19 | 24,069,166 | 24,629,285 | 2 | 0 | 2 | 1 |
| Case 98 | 19 | 27,732,159 | 28,258,780 | 2 | 0 | 2 | 1 |
| Case 98 | 19 | 28,269,366 | 29,219,850 | 1 | 1 | 2 | 0 |
| Case 98 | 19 | 29,224,672 | 29,414,631 | 2 | 0 | 2 | 1 |
| Case 98 | 19 | 29,419,850 | 37,326,284 | 1 | 1 | 2 | 0 |
| Case 98 | 19 | 37,327,292 | 37,854,040 | 2 | 0 | 2 | 1 |
| Case 98 | 19 | 37,854,207 | 40,259,342 | 1 | 1 | 2 | 0 |
| Case 98 | 19 | 40,260,350 | 40,419,939 | 2 | 0 | 2 | 1 |
| Case 98 | 19 | 40,419,945 | 42,941,059 | 1 | 1 | 2 | 0 |
| Case 98 | 19 | 42,947,113 | 43,268,493 | 2 | 0 | 2 | 1 |
| Case 98 | 19 | 43,270,565 | 44,590,661 | 1 | 1 | 2 | 0 |
| Case 98 | 19 | 44,590,851 | 44,681,720 | 2 | 0 | 2 | 1 |
| Case 98 | 19 | 44,681,795 | 47,119,910 | 1 | 1 | 2 | 0 |
| Case 98 | 19 | 47,121,867 | 47,287,939 | 2 | 0 | 2 | 1 |
| Case 98 | 19 | 47,288,150 | 52,353,834 | 1 | 1 | 2 | 0 |
| Case 98 | 19 | 52,356,791 | 52,394,334 | 2 | 0 | 2 | 1 |
| Case 98 | 19 | 52,394,439 | 55,005,607 | 1 | 1 | 2 | 0 |
| Case 98 | 19 | 55,010,819 | 55,175,856 | 2 | 0 | 2 | 1 |
| Case 98 | 19 | 55,176,262 | 57,955,719 | 1 | 1 | 2 | 0 |
| Case 98 | 19 | 57,955,729 | 58,048,573 | 2 | 0 | 2 | 1 |
| Case 98 | 19 | 58,048,625 | 59,097,160 | 1 | 1 | 2 | 0 |
| Case 98 | 20 | 63,244     | 382,876    | 1 | 1 | 2 | 0 |
| Case 98 | 20 | 383,720    | 411,773    | 2 | 0 | 2 | 1 |
| Case 98 | 20 | 411,842    | 3,903,634  | 1 | 1 | 2 | 0 |
| Case 98 | 20 | 3,905,730  | 4,038,492  | 2 | 0 | 2 | 1 |
| Case 98 | 20 | 4,039,627  | 10,357,002 | 1 | 1 | 2 | 0 |
| Case 98 | 20 | 10,365,407 | 10,644,614 | 2 | 0 | 2 | 1 |
| Case 98 | 20 | 10,650,354 | 12,024,709 | 1 | 1 | 2 | 0 |
| Case 98 | 20 | 12,038,794 | 12,311,079 | 2 | 0 | 2 | 1 |
| Case 98 | 20 | 12,311,212 | 23,517,691 | 1 | 1 | 2 | 0 |
| Case 98 | 20 | 23,519,418 | 23,749,714 | 2 | 0 | 2 | 1 |
| Case 98 | 20 | 23,750,897 | 24,685,851 | 1 | 1 | 2 | 0 |
| Case 98 | 20 | 24,688,597 | 26,293,985 | 2 | 0 | 2 | 1 |
| Case 98 | 20 | 29,425,357 | 30,421,587 | 2 | 0 | 2 | 1 |
| Case 98 | 20 | 30,422,578 | 32,484,429 | 1 | 1 | 2 | 0 |
| Case 98 | 20 | 32,485,560 | 32,846,036 | 2 | 0 | 2 | 1 |

|         |    |            |            |   |   |   |   |
|---------|----|------------|------------|---|---|---|---|
| Case 98 | 20 | 32,847,608 | 37,263,408 | 1 | 1 | 2 | 0 |
| Case 98 | 20 | 37,266,205 | 37,704,890 | 2 | 0 | 2 | 1 |
| Case 98 | 20 | 37,710,775 | 44,395,664 | 1 | 1 | 2 | 0 |
| Case 98 | 20 | 44,402,115 | 44,523,472 | 2 | 0 | 2 | 1 |
| Case 98 | 20 | 44,523,720 | 60,886,146 | 1 | 1 | 2 | 0 |
| Case 98 | 20 | 60,886,272 | 60,970,036 | 2 | 0 | 2 | 1 |
| Case 98 | 20 | 60,971,397 | 61,048,475 | 1 | 1 | 2 | 0 |
| Case 98 | 20 | 61,048,931 | 61,209,337 | 2 | 0 | 2 | 1 |
| Case 98 | 20 | 61,212,808 | 62,137,355 | 1 | 1 | 2 | 0 |
| Case 98 | 20 | 62,141,509 | 62,178,561 | 2 | 0 | 2 | 1 |
| Case 98 | 20 | 62,178,594 | 62,421,480 | 1 | 1 | 2 | 0 |
| Case 98 | 20 | 62,421,485 | 62,839,620 | 2 | 0 | 2 | 1 |
| Case 98 | 20 | 62,839,672 | 62,948,788 | 1 | 1 | 2 | 0 |
| Case 98 | 21 | 10,827,533 | 10,971,337 | 1 | 1 | 2 | 0 |
| Case 98 | 21 | 14,368,320 | 15,462,504 | 1 | 1 | 2 | 0 |
| Case 98 | 21 | 15,463,956 | 15,558,302 | 2 | 0 | 2 | 1 |
| Case 98 | 21 | 15,558,363 | 23,654,246 | 1 | 1 | 2 | 0 |
| Case 98 | 21 | 23,655,900 | 23,661,835 | 1 | 0 | 1 | 0 |
| Case 98 | 21 | 23,672,710 | 29,833,572 | 1 | 1 | 2 | 0 |
| Case 98 | 21 | 29,844,007 | 30,726,773 | 2 | 0 | 2 | 1 |
| Case 98 | 21 | 30,734,388 | 31,720,884 | 1 | 1 | 2 | 0 |
| Case 98 | 21 | 31,720,887 | 32,215,707 | 2 | 0 | 2 | 1 |
| Case 98 | 21 | 32,216,253 | 35,904,697 | 1 | 1 | 2 | 0 |
| Case 98 | 21 | 35,907,413 | 36,010,660 | 2 | 0 | 2 | 1 |
| Case 98 | 21 | 36,011,213 | 41,534,151 | 1 | 1 | 2 | 0 |
| Case 98 | 21 | 41,534,512 | 41,649,481 | 2 | 0 | 2 | 1 |
| Case 98 | 21 | 41,650,265 | 43,616,325 | 1 | 1 | 2 | 0 |
| Case 98 | 21 | 43,619,415 | 43,679,513 | 2 | 0 | 2 | 1 |
| Case 98 | 21 | 43,679,554 | 45,376,207 | 1 | 1 | 2 | 0 |
| Case 98 | 21 | 45,379,653 | 45,635,616 | 2 | 0 | 2 | 1 |
| Case 98 | 21 | 45,636,387 | 47,608,580 | 1 | 1 | 2 | 0 |
| Case 98 | 21 | 47,609,510 | 47,867,318 | 2 | 0 | 2 | 1 |
| Case 98 | 21 | 47,868,321 | 48,100,155 | 1 | 1 | 2 | 0 |
| Case 98 | 22 | 16,114,244 | 19,961,730 | 1 | 1 | 2 | 0 |
| Case 98 | 22 | 19,961,955 | 20,014,473 | 2 | 0 | 2 | 1 |
| Case 98 | 22 | 20,015,016 | 28,537,115 | 1 | 1 | 2 | 0 |
| Case 98 | 22 | 28,537,992 | 29,087,041 | 2 | 0 | 2 | 1 |
| Case 98 | 22 | 29,091,741 | 30,957,832 | 1 | 1 | 2 | 0 |
| Case 98 | 22 | 30,960,412 | 31,134,390 | 2 | 0 | 2 | 1 |
| Case 98 | 22 | 31,137,288 | 31,639,509 | 1 | 1 | 2 | 0 |
| Case 98 | 22 | 31,643,480 | 32,326,238 | 2 | 0 | 2 | 1 |
| Case 98 | 22 | 32,327,794 | 33,276,907 | 1 | 1 | 2 | 0 |
| Case 98 | 22 | 33,279,237 | 33,469,284 | 2 | 0 | 2 | 1 |
| Case 98 | 22 | 33,471,537 | 36,639,742 | 1 | 1 | 2 | 0 |
| Case 98 | 22 | 36,647,960 | 36,763,483 | 2 | 0 | 2 | 1 |
| Case 98 | 22 | 36,770,038 | 38,121,152 | 1 | 1 | 2 | 0 |
| Case 98 | 22 | 38,121,340 | 38,155,433 | 2 | 0 | 2 | 1 |
| Case 98 | 22 | 38,155,506 | 39,708,017 | 1 | 1 | 2 | 0 |
| Case 98 | 22 | 39,708,357 | 39,908,255 | 2 | 0 | 2 | 1 |
| Case 98 | 22 | 39,908,419 | 48,843,478 | 1 | 1 | 2 | 0 |
| Case 98 | 22 | 48,844,185 | 48,951,913 | 2 | 0 | 2 | 1 |
| Case 98 | 22 | 48,956,316 | 51,195,728 | 1 | 1 | 2 | 0 |
| Case 99 | 1  | 82,154     | 1,221,564  | 2 | 2 | 4 | 0 |
| Case 99 | 1  | 1,221,613  | 1,269,723  | 2 | 1 | 3 | 0 |
| Case 99 | 1  | 1,269,741  | 1,404,809  | 2 | 2 | 4 | 0 |
| Case 99 | 1  | 1,412,659  | 1,664,124  | 2 | 1 | 3 | 0 |
| Case 99 | 1  | 1,680,219  | 18,297,407 | 2 | 2 | 4 | 0 |
| Case 99 | 1  | 18,297,688 | 18,453,918 | 3 | 2 | 5 | 0 |
| Case 99 | 1  | 18,454,964 | 48,622,095 | 2 | 2 | 4 | 0 |
| Case 99 | 1  | 48,627,224 | 51,092,829 | 3 | 2 | 5 | 0 |
| Case 99 | 1  | 51,118,253 | 52,787,309 | 3 | 0 | 3 | 1 |

|         |   |             |             |   |   |   |   |
|---------|---|-------------|-------------|---|---|---|---|
| Case 99 | 1 | 52,793,838  | 56,867,523  | 2 | 2 | 4 | 0 |
| Case 99 | 1 | 56,867,989  | 57,651,809  | 3 | 2 | 5 | 0 |
| Case 99 | 1 | 57,652,069  | 58,692,527  | 2 | 2 | 4 | 0 |
| Case 99 | 1 | 58,700,416  | 62,102,307  | 3 | 1 | 4 | 0 |
| Case 99 | 1 | 62,103,021  | 62,675,892  | 3 | 0 | 3 | 1 |
| Case 99 | 1 | 62,675,894  | 67,208,622  | 3 | 1 | 4 | 0 |
| Case 99 | 1 | 67,209,088  | 67,581,127  | 3 | 0 | 3 | 1 |
| Case 99 | 1 | 67,583,298  | 76,133,823  | 3 | 1 | 4 | 0 |
| Case 99 | 1 | 76,134,765  | 76,432,008  | 3 | 0 | 3 | 1 |
| Case 99 | 1 | 76,438,011  | 77,952,756  | 3 | 1 | 4 | 0 |
| Case 99 | 1 | 77,954,804  | 80,463,537  | 3 | 2 | 5 | 0 |
| Case 99 | 1 | 80,477,880  | 83,701,382  | 2 | 2 | 4 | 0 |
| Case 99 | 1 | 83,701,728  | 84,880,273  | 3 | 1 | 4 | 0 |
| Case 99 | 1 | 84,880,380  | 85,235,399  | 3 | 0 | 3 | 1 |
| Case 99 | 1 | 85,239,564  | 86,106,292  | 3 | 1 | 4 | 0 |
| Case 99 | 1 | 86,117,583  | 86,507,592  | 3 | 0 | 3 | 1 |
| Case 99 | 1 | 86,512,253  | 89,408,756  | 3 | 1 | 4 | 0 |
| Case 99 | 1 | 89,409,105  | 89,522,536  | 3 | 0 | 3 | 1 |
| Case 99 | 1 | 89,522,537  | 92,425,621  | 3 | 1 | 4 | 0 |
| Case 99 | 1 | 92,426,474  | 93,401,837  | 2 | 1 | 3 | 0 |
| Case 99 | 1 | 93,421,930  | 93,666,349  | 3 | 1 | 4 | 0 |
| Case 99 | 1 | 93,667,456  | 94,291,481  | 3 | 0 | 3 | 1 |
| Case 99 | 1 | 94,320,233  | 98,013,638  | 3 | 1 | 4 | 0 |
| Case 99 | 1 | 98,013,892  | 98,529,378  | 3 | 0 | 3 | 1 |
| Case 99 | 1 | 98,530,559  | 100,155,425 | 3 | 1 | 4 | 0 |
| Case 99 | 1 | 100,156,054 | 100,808,363 | 3 | 0 | 3 | 1 |
| Case 99 | 1 | 100,811,859 | 103,305,021 | 3 | 1 | 4 | 0 |
| Case 99 | 1 | 103,322,312 | 104,113,723 | 3 | 0 | 3 | 1 |
| Case 99 | 1 | 104,116,343 | 106,849,846 | 3 | 1 | 4 | 0 |
| Case 99 | 1 | 106,860,057 | 107,230,730 | 3 | 0 | 3 | 1 |
| Case 99 | 1 | 107,232,816 | 109,271,364 | 3 | 1 | 4 | 0 |
| Case 99 | 1 | 109,271,428 | 109,386,174 | 3 | 0 | 3 | 1 |
| Case 99 | 1 | 109,386,466 | 113,098,534 | 3 | 1 | 4 | 0 |
| Case 99 | 1 | 113,098,598 | 113,493,337 | 3 | 0 | 3 | 1 |
| Case 99 | 1 | 113,494,172 | 120,286,863 | 2 | 2 | 4 | 0 |
| Case 99 | 1 | 120,287,490 | 121,346,616 | 3 | 2 | 5 | 0 |
| Case 99 | 1 | 142,649,718 | 145,530,351 | 3 | 2 | 5 | 0 |
| Case 99 | 1 | 145,530,939 | 151,740,666 | 2 | 2 | 4 | 0 |
| Case 99 | 1 | 151,742,726 | 152,129,381 | 3 | 2 | 5 | 0 |
| Case 99 | 1 | 152,129,405 | 158,380,828 | 2 | 2 | 4 | 0 |
| Case 99 | 1 | 158,381,815 | 158,913,731 | 3 | 2 | 5 | 0 |
| Case 99 | 1 | 158,915,141 | 175,387,018 | 2 | 2 | 4 | 0 |
| Case 99 | 1 | 175,387,030 | 175,824,630 | 3 | 2 | 5 | 0 |
| Case 99 | 1 | 175,824,794 | 183,850,901 | 2 | 2 | 4 | 0 |
| Case 99 | 1 | 183,852,914 | 184,801,049 | 3 | 2 | 5 | 0 |
| Case 99 | 1 | 184,801,065 | 208,068,579 | 2 | 2 | 4 | 0 |
| Case 99 | 1 | 208,069,137 | 208,681,819 | 3 | 2 | 5 | 0 |
| Case 99 | 1 | 208,700,733 | 234,315,938 | 2 | 2 | 4 | 0 |
| Case 99 | 1 | 234,320,769 | 234,452,263 | 3 | 1 | 4 | 0 |
| Case 99 | 1 | 234,452,980 | 234,638,534 | 3 | 0 | 3 | 1 |
| Case 99 | 1 | 234,648,819 | 235,611,093 | 3 | 1 | 4 | 0 |
| Case 99 | 1 | 235,611,703 | 235,969,228 | 2 | 1 | 3 | 0 |
| Case 99 | 1 | 235,969,353 | 239,946,076 | 3 | 1 | 4 | 0 |
| Case 99 | 1 | 239,955,676 | 241,659,359 | 3 | 2 | 5 | 0 |
| Case 99 | 1 | 241,665,852 | 249,218,992 | 2 | 2 | 4 | 0 |
| Case 99 | 2 | 18,674      | 32,092,257  | 2 | 2 | 4 | 0 |
| Case 99 | 2 | 32,103,689  | 32,740,353  | 3 | 2 | 5 | 0 |
| Case 99 | 2 | 32,740,520  | 64,176,182  | 2 | 2 | 4 | 0 |
| Case 99 | 2 | 64,176,230  | 65,080,772  | 2 | 1 | 3 | 0 |
| Case 99 | 2 | 65,082,367  | 92,081,640  | 2 | 2 | 4 | 0 |
| Case 99 | 2 | 95,429,424  | 120,374,068 | 2 | 2 | 4 | 0 |

|         |   |             |             |   |   |   |   |
|---------|---|-------------|-------------|---|---|---|---|
| Case 99 | 2 | 120,387,515 | 121,853,648 | 2 | 1 | 3 | 0 |
| Case 99 | 2 | 121,853,817 | 159,667,328 | 2 | 2 | 4 | 0 |
| Case 99 | 2 | 159,667,348 | 159,787,793 | 3 | 0 | 3 | 1 |
| Case 99 | 2 | 159,792,033 | 163,217,812 | 2 | 1 | 3 | 0 |
| Case 99 | 2 | 163,224,521 | 171,818,244 | 2 | 2 | 4 | 0 |
| Case 99 | 2 | 171,822,466 | 175,263,063 | 2 | 1 | 3 | 0 |
| Case 99 | 2 | 175,263,171 | 179,397,127 | 2 | 2 | 4 | 0 |
| Case 99 | 2 | 179,397,432 | 179,438,185 | 3 | 2 | 5 | 0 |
| Case 99 | 2 | 179,438,272 | 233,562,102 | 2 | 2 | 4 | 0 |
| Case 99 | 2 | 233,567,342 | 233,924,009 | 2 | 1 | 3 | 0 |
| Case 99 | 2 | 233,926,201 | 238,999,883 | 2 | 2 | 4 | 0 |
| Case 99 | 2 | 239,002,506 | 239,075,812 | 2 | 1 | 3 | 0 |
| Case 99 | 2 | 239,075,935 | 241,373,780 | 2 | 2 | 4 | 0 |
| Case 99 | 2 | 241,382,083 | 241,404,906 | 2 | 1 | 3 | 0 |
| Case 99 | 2 | 241,405,501 | 242,572,986 | 2 | 2 | 4 | 0 |
| Case 99 | 2 | 242,572,997 | 243,048,760 | 2 | 1 | 3 | 0 |
| Case 99 | 3 | 61,495      | 24,620,808  | 3 | 0 | 3 | 1 |
| Case 99 | 3 | 24,621,433  | 35,167,376  | 3 | 1 | 4 | 0 |
| Case 99 | 3 | 35,170,656  | 35,282,759  | 2 | 1 | 3 | 0 |
| Case 99 | 3 | 35,286,114  | 36,267,529  | 3 | 2 | 5 | 0 |
| Case 99 | 3 | 36,270,289  | 36,409,601  | 2 | 2 | 4 | 0 |
| Case 99 | 3 | 36,420,628  | 36,422,209  | 3 | 2 | 5 | 0 |
| Case 99 | 3 | 36,425,536  | 37,182,198  | 4 | 2 | 6 | 0 |
| Case 99 | 3 | 37,184,473  | 37,639,213  | 3 | 2 | 5 | 0 |
| Case 99 | 3 | 37,641,584  | 37,652,985  | 2 | 2 | 4 | 0 |
| Case 99 | 3 | 37,662,867  | 46,003,832  | 3 | 1 | 4 | 0 |
| Case 99 | 3 | 46,003,868  | 46,010,179  | 3 | 0 | 3 | 1 |
| Case 99 | 3 | 46,010,194  | 50,312,774  | 3 | 1 | 4 | 0 |
| Case 99 | 3 | 50,312,822  | 50,568,412  | 2 | 1 | 3 | 0 |
| Case 99 | 3 | 50,574,213  | 51,754,491  | 3 | 1 | 4 | 0 |
| Case 99 | 3 | 51,755,441  | 60,434,122  | 3 | 0 | 3 | 1 |
| Case 99 | 3 | 60,434,444  | 60,438,026  | 2 | 1 | 3 | 0 |
| Case 99 | 3 | 60,439,043  | 60,518,998  | 0 | 0 | 0 | 0 |
| Case 99 | 3 | 60,519,576  | 60,521,596  | 5 | 1 | 6 | 0 |
| Case 99 | 3 | 60,522,599  | 60,531,242  | 2 | 2 | 4 | 0 |
| Case 99 | 3 | 60,536,420  | 69,350,874  | 3 | 0 | 3 | 1 |
| Case 99 | 3 | 69,351,582  | 90,442,925  | 4 | 0 | 4 | 1 |
| Case 99 | 3 | 93,537,290  | 95,795,276  | 4 | 0 | 4 | 1 |
| Case 99 | 3 | 95,796,421  | 97,728,248  | 4 | 1 | 5 | 0 |
| Case 99 | 3 | 97,729,328  | 97,755,270  | 2 | 2 | 4 | 0 |
| Case 99 | 3 | 97,766,185  | 99,248,498  | 4 | 0 | 4 | 1 |
| Case 99 | 3 | 99,254,429  | 119,350,324 | 4 | 1 | 5 | 0 |
| Case 99 | 3 | 119,353,185 | 121,630,194 | 4 | 0 | 4 | 1 |
| Case 99 | 3 | 121,630,328 | 122,128,638 | 4 | 1 | 5 | 0 |
| Case 99 | 3 | 122,128,658 | 122,130,751 | 2 | 2 | 4 | 0 |
| Case 99 | 3 | 122,133,383 | 122,661,637 | 4 | 0 | 4 | 1 |
| Case 99 | 3 | 122,661,863 | 124,906,162 | 4 | 1 | 5 | 0 |
| Case 99 | 3 | 124,906,167 | 124,906,167 | 2 | 2 | 4 | 0 |
| Case 99 | 3 | 124,906,235 | 126,752,799 | 4 | 0 | 4 | 1 |
| Case 99 | 3 | 126,755,134 | 135,722,103 | 4 | 1 | 5 | 0 |
| Case 99 | 3 | 135,722,241 | 136,612,149 | 4 | 0 | 4 | 1 |
| Case 99 | 3 | 136,618,214 | 137,779,492 | 4 | 1 | 5 | 0 |
| Case 99 | 3 | 137,781,249 | 137,787,282 | 2 | 2 | 4 | 0 |
| Case 99 | 3 | 137,789,903 | 138,843,870 | 4 | 0 | 4 | 1 |
| Case 99 | 3 | 138,847,358 | 141,497,178 | 4 | 1 | 5 | 0 |
| Case 99 | 3 | 141,497,319 | 142,672,769 | 4 | 0 | 4 | 1 |
| Case 99 | 3 | 142,677,280 | 149,329,371 | 4 | 1 | 5 | 0 |
| Case 99 | 3 | 149,329,819 | 149,347,571 | 2 | 2 | 4 | 0 |
| Case 99 | 3 | 149,358,539 | 149,777,272 | 4 | 0 | 4 | 1 |
| Case 99 | 3 | 149,777,669 | 152,831,552 | 4 | 1 | 5 | 0 |
| Case 99 | 3 | 152,833,338 | 153,754,091 | 4 | 0 | 4 | 1 |

|         |   |             |             |   |   |   |   |
|---------|---|-------------|-------------|---|---|---|---|
| Case 99 | 3 | 153,754,124 | 159,611,291 | 4 | 1 | 5 | 0 |
| Case 99 | 3 | 159,613,455 | 167,159,834 | 4 | 0 | 4 | 1 |
| Case 99 | 3 | 167,160,291 | 175,012,620 | 4 | 1 | 5 | 0 |
| Case 99 | 3 | 175,015,466 | 176,925,740 | 4 | 0 | 4 | 1 |
| Case 99 | 3 | 176,929,742 | 178,341,582 | 4 | 1 | 5 | 0 |
| Case 99 | 3 | 178,343,683 | 178,397,892 | 2 | 2 | 4 | 0 |
| Case 99 | 3 | 178,399,551 | 179,306,648 | 4 | 0 | 4 | 1 |
| Case 99 | 3 | 179,306,666 | 183,259,865 | 4 | 1 | 5 | 0 |
| Case 99 | 3 | 183,260,759 | 184,486,297 | 4 | 0 | 4 | 1 |
| Case 99 | 3 | 184,488,916 | 194,117,448 | 4 | 1 | 5 | 0 |
| Case 99 | 3 | 194,117,723 | 194,118,741 | 2 | 2 | 4 | 0 |
| Case 99 | 3 | 194,118,946 | 197,838,262 | 4 | 0 | 4 | 1 |
| Case 99 | 4 | 71,566      | 49,620,898  | 3 | 0 | 3 | 1 |
| Case 99 | 4 | 52,697,856  | 190,963,766 | 3 | 0 | 3 | 1 |
| Case 99 | 5 | 38,139      | 1,242,820   | 3 | 1 | 4 | 0 |
| Case 99 | 5 | 1,243,427   | 13,829,140  | 3 | 2 | 5 | 0 |
| Case 99 | 5 | 13,829,611  | 13,845,080  | 2 | 2 | 4 | 0 |
| Case 99 | 5 | 13,846,802  | 19,450,474  | 4 | 2 | 6 | 0 |
| Case 99 | 5 | 19,451,589  | 19,451,589  | 2 | 2 | 4 | 0 |
| Case 99 | 5 | 19,459,826  | 22,550,328  | 3 | 2 | 5 | 0 |
| Case 99 | 5 | 22,551,757  | 26,125,639  | 4 | 2 | 6 | 0 |
| Case 99 | 5 | 26,125,816  | 26,125,816  | 3 | 2 | 5 | 0 |
| Case 99 | 5 | 26,132,948  | 26,182,839  | 2 | 2 | 4 | 0 |
| Case 99 | 5 | 26,193,999  | 32,037,337  | 3 | 2 | 5 | 0 |
| Case 99 | 5 | 32,042,760  | 32,716,589  | 3 | 1 | 4 | 0 |
| Case 99 | 5 | 32,722,499  | 37,058,116  | 3 | 2 | 5 | 0 |
| Case 99 | 5 | 37,061,067  | 37,556,926  | 2 | 2 | 4 | 0 |
| Case 99 | 5 | 37,567,851  | 38,966,790  | 3 | 2 | 5 | 0 |
| Case 99 | 5 | 38,974,929  | 40,678,049  | 4 | 2 | 6 | 0 |
| Case 99 | 5 | 40,679,789  | 40,755,568  | 2 | 2 | 4 | 0 |
| Case 99 | 5 | 40,758,108  | 45,983,680  | 3 | 2 | 5 | 0 |
| Case 99 | 5 | 45,988,948  | 46,399,093  | 2 | 1 | 3 | 0 |
| Case 99 | 5 | 49,457,282  | 59,143,129  | 2 | 1 | 3 | 0 |
| Case 99 | 5 | 59,152,509  | 59,502,520  | 1 | 1 | 2 | 0 |
| Case 99 | 5 | 59,515,334  | 92,064,034  | 2 | 1 | 3 | 0 |
| Case 99 | 5 | 92,064,532  | 93,257,691  | 2 | 2 | 4 | 0 |
| Case 99 | 5 | 93,260,865  | 113,385,553 | 2 | 1 | 3 | 0 |
| Case 99 | 5 | 113,389,336 | 154,478,636 | 2 | 2 | 4 | 0 |
| Case 99 | 5 | 154,486,109 | 154,529,948 | 4 | 2 | 6 | 0 |
| Case 99 | 5 | 154,530,330 | 162,997,351 | 2 | 2 | 4 | 0 |
| Case 99 | 5 | 162,997,442 | 169,026,043 | 2 | 1 | 3 | 0 |
| Case 99 | 5 | 169,028,316 | 180,693,127 | 2 | 2 | 4 | 0 |
| Case 99 | 6 | 108,666     | 29,616,607  | 3 | 1 | 4 | 0 |
| Case 99 | 6 | 29,617,747  | 29,628,883  | 2 | 2 | 4 | 0 |
| Case 99 | 6 | 29,629,001  | 29,989,695  | 4 | 0 | 4 | 1 |
| Case 99 | 6 | 29,991,538  | 30,004,849  | 3 | 0 | 3 | 1 |
| Case 99 | 6 | 30,005,043  | 30,430,875  | 3 | 1 | 4 | 0 |
| Case 99 | 6 | 30,431,371  | 30,512,603  | 3 | 0 | 3 | 1 |
| Case 99 | 6 | 30,514,073  | 31,734,293  | 3 | 1 | 4 | 0 |
| Case 99 | 6 | 31,734,313  | 31,799,494  | 2 | 1 | 3 | 0 |
| Case 99 | 6 | 31,800,868  | 32,632,820  | 3 | 1 | 4 | 0 |
| Case 99 | 6 | 32,632,832  | 32,672,082  | 2 | 1 | 3 | 0 |
| Case 99 | 6 | 32,673,574  | 33,085,851  | 3 | 1 | 4 | 0 |
| Case 99 | 6 | 33,085,910  | 33,116,222  | 2 | 1 | 3 | 0 |
| Case 99 | 6 | 33,117,258  | 34,118,586  | 3 | 1 | 4 | 0 |
| Case 99 | 6 | 34,125,281  | 34,704,613  | 2 | 1 | 3 | 0 |
| Case 99 | 6 | 34,715,341  | 41,185,474  | 3 | 1 | 4 | 0 |
| Case 99 | 6 | 41,190,791  | 45,295,124  | 2 | 2 | 4 | 0 |
| Case 99 | 6 | 45,296,398  | 47,168,437  | 3 | 2 | 5 | 0 |
| Case 99 | 6 | 47,171,810  | 47,649,356  | 2 | 1 | 3 | 0 |
| Case 99 | 6 | 47,649,573  | 47,711,725  | 3 | 2 | 5 | 0 |

|         |   |             |             |   |   |   |   |
|---------|---|-------------|-------------|---|---|---|---|
| Case 99 | 6 | 47,720,824  | 49,704,546  | 2 | 2 | 4 | 0 |
| Case 99 | 6 | 49,710,970  | 52,405,415  | 3 | 2 | 5 | 0 |
| Case 99 | 6 | 52,411,122  | 53,869,221  | 5 | 2 | 7 | 0 |
| Case 99 | 6 | 53,873,799  | 54,726,327  | 2 | 2 | 4 | 0 |
| Case 99 | 6 | 54,727,075  | 55,113,411  | 3 | 2 | 5 | 0 |
| Case 99 | 6 | 55,119,930  | 55,162,885  | 2 | 1 | 3 | 0 |
| Case 99 | 6 | 55,164,486  | 58,752,089  | 3 | 1 | 4 | 0 |
| Case 99 | 6 | 61,891,118  | 62,012,988  | 3 | 1 | 4 | 0 |
| Case 99 | 6 | 62,018,602  | 63,174,910  | 2 | 2 | 4 | 0 |
| Case 99 | 6 | 63,199,731  | 64,712,869  | 3 | 0 | 3 | 1 |
| Case 99 | 6 | 64,721,056  | 64,769,816  | 4 | 0 | 4 | 1 |
| Case 99 | 6 | 64,771,342  | 67,157,506  | 6 | 0 | 6 | 1 |
| Case 99 | 6 | 67,167,633  | 67,171,877  | 4 | 1 | 5 | 0 |
| Case 99 | 6 | 67,179,287  | 67,231,094  | 2 | 2 | 4 | 0 |
| Case 99 | 6 | 67,238,014  | 69,844,768  | 4 | 0 | 4 | 1 |
| Case 99 | 6 | 69,847,967  | 77,490,717  | 6 | 0 | 6 | 1 |
| Case 99 | 6 | 77,490,961  | 77,524,451  | 5 | 1 | 6 | 0 |
| Case 99 | 6 | 77,525,160  | 82,078,440  | 6 | 1 | 7 | 0 |
| Case 99 | 6 | 82,087,297  | 82,286,331  | 0 | 0 | 0 | 0 |
| Case 99 | 6 | 82,304,235  | 91,352,508  | 5 | 1 | 6 | 0 |
| Case 99 | 6 | 91,356,629  | 104,730,153 | 6 | 1 | 7 | 0 |
| Case 99 | 6 | 104,730,184 | 104,730,184 | 0 | 0 | 0 | 0 |
| Case 99 | 6 | 104,740,041 | 106,292,430 | 5 | 1 | 6 | 0 |
| Case 99 | 6 | 106,296,457 | 110,726,101 | 7 | 0 | 7 | 1 |
| Case 99 | 6 | 110,726,236 | 111,672,903 | 6 | 1 | 7 | 0 |
| Case 99 | 6 | 111,673,714 | 138,902,869 | 3 | 1 | 4 | 0 |
| Case 99 | 6 | 138,905,857 | 139,625,074 | 2 | 1 | 3 | 0 |
| Case 99 | 6 | 139,625,649 | 147,243,419 | 3 | 1 | 4 | 0 |
| Case 99 | 6 | 147,246,494 | 147,992,200 | 2 | 1 | 3 | 0 |
| Case 99 | 6 | 147,993,054 | 150,005,515 | 3 | 1 | 4 | 0 |
| Case 99 | 6 | 150,005,615 | 150,201,720 | 2 | 1 | 3 | 0 |
| Case 99 | 6 | 150,205,095 | 150,477,700 | 2 | 2 | 4 | 0 |
| Case 99 | 6 | 150,477,907 | 150,610,615 | 3 | 2 | 5 | 0 |
| Case 99 | 6 | 150,611,385 | 151,125,896 | 2 | 1 | 3 | 0 |
| Case 99 | 6 | 151,126,585 | 151,315,241 | 2 | 2 | 4 | 0 |
| Case 99 | 6 | 151,317,192 | 153,543,995 | 3 | 1 | 4 | 0 |
| Case 99 | 6 | 153,546,315 | 154,294,803 | 2 | 1 | 3 | 0 |
| Case 99 | 6 | 154,294,917 | 154,958,156 | 3 | 1 | 4 | 0 |
| Case 99 | 6 | 154,961,462 | 154,978,780 | 2 | 1 | 3 | 0 |
| Case 99 | 6 | 154,981,639 | 155,219,158 | 1 | 1 | 2 | 0 |
| Case 99 | 6 | 155,221,600 | 155,935,243 | 2 | 1 | 3 | 0 |
| Case 99 | 6 | 155,938,820 | 156,335,686 | 3 | 0 | 3 | 1 |
| Case 99 | 6 | 156,335,857 | 156,553,950 | 2 | 1 | 3 | 0 |
| Case 99 | 6 | 156,555,020 | 157,418,960 | 2 | 2 | 4 | 0 |
| Case 99 | 6 | 157,419,508 | 160,543,123 | 3 | 1 | 4 | 0 |
| Case 99 | 6 | 160,543,148 | 161,386,772 | 2 | 2 | 4 | 0 |
| Case 99 | 6 | 161,391,546 | 162,671,390 | 3 | 1 | 4 | 0 |
| Case 99 | 6 | 162,674,093 | 162,703,419 | 3 | 0 | 3 | 1 |
| Case 99 | 6 | 162,709,948 | 163,309,796 | 2 | 1 | 3 | 0 |
| Case 99 | 6 | 163,312,690 | 163,782,827 | 2 | 2 | 4 | 0 |
| Case 99 | 6 | 163,783,291 | 164,703,988 | 2 | 1 | 3 | 0 |
| Case 99 | 6 | 164,704,041 | 165,588,018 | 1 | 1 | 2 | 0 |
| Case 99 | 6 | 165,588,626 | 166,008,713 | 2 | 1 | 3 | 0 |
| Case 99 | 6 | 166,011,067 | 166,403,527 | 2 | 2 | 4 | 0 |
| Case 99 | 6 | 166,404,335 | 166,540,384 | 2 | 1 | 3 | 0 |
| Case 99 | 6 | 166,543,262 | 166,579,253 | 3 | 0 | 3 | 1 |
| Case 99 | 6 | 166,579,270 | 166,859,080 | 2 | 1 | 3 | 0 |
| Case 99 | 6 | 166,859,572 | 167,199,572 | 2 | 2 | 4 | 0 |
| Case 99 | 6 | 167,200,813 | 168,443,357 | 2 | 1 | 3 | 0 |
| Case 99 | 6 | 168,445,510 | 168,726,618 | 1 | 1 | 2 | 0 |
| Case 99 | 6 | 168,731,137 | 170,980,171 | 2 | 1 | 3 | 0 |



|         |   |             |             |   |   |   |   |
|---------|---|-------------|-------------|---|---|---|---|
| Case 99 | 7 | 44,935      | 962,371     | 2 | 2 | 4 | 0 |
| Case 99 | 7 | 965,643     | 1,586,866   | 2 | 1 | 3 | 0 |
| Case 99 | 7 | 1,587,440   | 2,472,517   | 2 | 2 | 4 | 0 |
| Case 99 | 7 | 2,472,555   | 2,752,487   | 2 | 1 | 3 | 0 |
| Case 99 | 7 | 2,752,932   | 3,998,566   | 2 | 2 | 4 | 0 |
| Case 99 | 7 | 4,002,369   | 4,272,893   | 3 | 2 | 5 | 0 |
| Case 99 | 7 | 4,272,931   | 7,902,687   | 2 | 2 | 4 | 0 |
| Case 99 | 7 | 7,903,077   | 7,982,218   | 3 | 2 | 5 | 0 |
| Case 99 | 7 | 7,987,137   | 8,154,535   | 2 | 2 | 4 | 0 |
| Case 99 | 7 | 8,156,375   | 8,637,302   | 3 | 2 | 5 | 0 |
| Case 99 | 7 | 8,637,693   | 13,673,727  | 2 | 2 | 4 | 0 |
| Case 99 | 7 | 13,674,145  | 13,836,003  | 2 | 1 | 3 | 0 |
| Case 99 | 7 | 13,841,798  | 15,761,537  | 3 | 1 | 4 | 0 |
| Case 99 | 7 | 15,762,763  | 31,735,236  | 2 | 2 | 4 | 0 |
| Case 99 | 7 | 31,736,599  | 31,943,754  | 3 | 1 | 4 | 0 |
| Case 99 | 7 | 31,949,763  | 46,793,982  | 2 | 2 | 4 | 0 |
| Case 99 | 7 | 46,795,322  | 52,804,569  | 3 | 1 | 4 | 0 |
| Case 99 | 7 | 52,804,915  | 53,381,584  | 2 | 2 | 4 | 0 |
| Case 99 | 7 | 53,385,379  | 55,280,152  | 3 | 2 | 5 | 0 |
| Case 99 | 7 | 55,280,268  | 57,621,951  | 2 | 2 | 4 | 0 |
| Case 99 | 7 | 57,642,390  | 58,019,061  | 4 | 0 | 4 | 1 |
| Case 99 | 7 | 61,056,053  | 63,475,033  | 4 | 0 | 4 | 1 |
| Case 99 | 7 | 63,495,571  | 63,599,625  | 4 | 1 | 5 | 0 |
| Case 99 | 7 | 63,634,439  | 69,783,020  | 2 | 2 | 4 | 0 |
| Case 99 | 7 | 69,783,198  | 73,157,315  | 3 | 2 | 5 | 0 |
| Case 99 | 7 | 73,178,435  | 73,403,193  | 2 | 2 | 4 | 0 |
| Case 99 | 7 | 73,405,560  | 74,564,099  | 3 | 2 | 5 | 0 |
| Case 99 | 7 | 74,776,390  | 81,868,200  | 2 | 2 | 4 | 0 |
| Case 99 | 7 | 81,868,265  | 83,774,499  | 3 | 2 | 5 | 0 |
| Case 99 | 7 | 83,775,796  | 85,215,841  | 3 | 0 | 3 | 1 |
| Case 99 | 7 | 85,216,272  | 85,240,205  | 2 | 1 | 3 | 0 |
| Case 99 | 7 | 85,250,155  | 88,601,192  | 5 | 2 | 7 | 0 |
| Case 99 | 7 | 88,604,651  | 88,607,314  | 2 | 2 | 4 | 0 |
| Case 99 | 7 | 88,613,111  | 94,840,916  | 4 | 2 | 6 | 0 |
| Case 99 | 7 | 94,850,268  | 98,051,932  | 6 | 1 | 7 | 0 |
| Case 99 | 7 | 98,054,504  | 98,092,368  | 3 | 1 | 4 | 0 |
| Case 99 | 7 | 98,092,506  | 149,479,320 | 3 | 0 | 3 | 1 |
| Case 99 | 7 | 149,479,335 | 149,486,256 | 2 | 1 | 3 | 0 |
| Case 99 | 7 | 149,486,333 | 149,529,970 | 1 | 1 | 2 | 0 |
| Case 99 | 7 | 149,530,894 | 149,558,632 | 2 | 1 | 3 | 0 |
| Case 99 | 7 | 149,558,744 | 159,119,486 | 3 | 0 | 3 | 1 |
| Case 99 | 8 | 164,984     | 2,034,776   | 4 | 0 | 4 | 1 |
| Case 99 | 8 | 2,035,025   | 2,813,153   | 5 | 0 | 5 | 1 |
| Case 99 | 8 | 2,813,376   | 3,264,509   | 4 | 0 | 4 | 1 |
| Case 99 | 8 | 3,265,480   | 3,869,134   | 5 | 0 | 5 | 1 |
| Case 99 | 8 | 3,869,858   | 4,061,058   | 4 | 0 | 4 | 1 |
| Case 99 | 8 | 4,061,204   | 6,188,792   | 5 | 0 | 5 | 1 |
| Case 99 | 8 | 6,192,831   | 6,383,599   | 4 | 0 | 4 | 1 |
| Case 99 | 8 | 6,385,181   | 6,774,414   | 5 | 0 | 5 | 1 |
| Case 99 | 8 | 6,777,051   | 8,304,502   | 4 | 0 | 4 | 1 |
| Case 99 | 8 | 8,307,128   | 10,356,449  | 5 | 0 | 5 | 1 |
| Case 99 | 8 | 10,359,394  | 10,622,930  | 4 | 0 | 4 | 1 |
| Case 99 | 8 | 10,622,935  | 11,147,123  | 5 | 0 | 5 | 1 |
| Case 99 | 8 | 11,152,760  | 11,607,396  | 4 | 0 | 4 | 1 |
| Case 99 | 8 | 11,608,905  | 11,787,688  | 5 | 0 | 5 | 1 |
| Case 99 | 8 | 11,793,529  | 13,190,938  | 4 | 0 | 4 | 1 |
| Case 99 | 8 | 13,191,608  | 17,563,896  | 5 | 0 | 5 | 1 |
| Case 99 | 8 | 17,564,973  | 17,999,052  | 4 | 0 | 4 | 1 |
| Case 99 | 8 | 18,004,224  | 20,032,587  | 5 | 0 | 5 | 1 |
| Case 99 | 8 | 20,035,990  | 20,695,239  | 4 | 0 | 4 | 1 |
| Case 99 | 8 | 20,697,695  | 21,728,788  | 5 | 0 | 5 | 1 |

|         |   |             |             |   |   |   |   |
|---------|---|-------------|-------------|---|---|---|---|
| Case 99 | 8 | 21,733,768  | 22,740,325  | 4 | 0 | 4 | 1 |
| Case 99 | 8 | 22,744,108  | 23,185,580  | 3 | 0 | 3 | 1 |
| Case 99 | 8 | 23,185,977  | 25,657,921  | 4 | 0 | 4 | 1 |
| Case 99 | 8 | 25,660,392  | 26,413,989  | 3 | 0 | 3 | 1 |
| Case 99 | 8 | 26,414,551  | 27,595,880  | 4 | 0 | 4 | 1 |
| Case 99 | 8 | 27,596,623  | 28,478,892  | 3 | 0 | 3 | 1 |
| Case 99 | 8 | 28,479,611  | 29,253,809  | 4 | 0 | 4 | 1 |
| Case 99 | 8 | 29,255,584  | 32,991,234  | 5 | 0 | 5 | 1 |
| Case 99 | 8 | 32,998,985  | 35,680,145  | 3 | 0 | 3 | 1 |
| Case 99 | 8 | 35,688,841  | 37,660,948  | 5 | 0 | 5 | 1 |
| Case 99 | 8 | 37,667,018  | 39,468,204  | 4 | 0 | 4 | 1 |
| Case 99 | 8 | 39,480,366  | 40,741,589  | 5 | 0 | 5 | 1 |
| Case 99 | 8 | 40,756,407  | 42,705,702  | 4 | 0 | 4 | 1 |
| Case 99 | 8 | 42,706,014  | 43,791,691  | 3 | 0 | 3 | 1 |
| Case 99 | 8 | 46,886,735  | 47,800,155  | 3 | 0 | 3 | 1 |
| Case 99 | 8 | 47,823,236  | 48,492,845  | 5 | 0 | 5 | 1 |
| Case 99 | 8 | 48,511,602  | 48,964,607  | 4 | 0 | 4 | 1 |
| Case 99 | 8 | 48,974,616  | 59,596,533  | 5 | 0 | 5 | 1 |
| Case 99 | 8 | 59,596,999  | 59,596,999  | 4 | 0 | 4 | 1 |
| Case 99 | 8 | 59,599,500  | 85,686,889  | 6 | 0 | 6 | 1 |
| Case 99 | 8 | 85,694,675  | 86,127,149  | 4 | 1 | 5 | 0 |
| Case 99 | 8 | 86,130,623  | 118,175,771 | 5 | 0 | 5 | 1 |
| Case 99 | 8 | 118,181,090 | 124,137,984 | 6 | 0 | 6 | 1 |
| Case 99 | 8 | 124,138,340 | 124,154,582 | 5 | 0 | 5 | 1 |
| Case 99 | 8 | 124,154,697 | 124,193,523 | 4 | 1 | 5 | 0 |
| Case 99 | 8 | 124,194,968 | 126,484,526 | 5 | 0 | 5 | 1 |
| Case 99 | 8 | 126,485,531 | 130,685,457 | 6 | 0 | 6 | 1 |
| Case 99 | 8 | 130,685,516 | 143,535,189 | 5 | 0 | 5 | 1 |
| Case 99 | 8 | 143,548,500 | 144,733,508 | 4 | 0 | 4 | 1 |
| Case 99 | 8 | 144,733,523 | 146,293,414 | 3 | 0 | 3 | 1 |
| Case 99 | 9 | 46,587      | 16,658,915  | 3 | 1 | 4 | 0 |
| Case 99 | 9 | 16,659,259  | 18,601,460  | 3 | 0 | 3 | 1 |
| Case 99 | 9 | 18,601,564  | 18,818,890  | 3 | 1 | 4 | 0 |
| Case 99 | 9 | 18,818,973  | 19,469,713  | 3 | 0 | 3 | 1 |
| Case 99 | 9 | 19,469,846  | 20,477,061  | 3 | 1 | 4 | 0 |
| Case 99 | 9 | 20,478,188  | 23,285,981  | 3 | 0 | 3 | 1 |
| Case 99 | 9 | 23,288,364  | 23,651,429  | 3 | 1 | 4 | 0 |
| Case 99 | 9 | 23,653,899  | 24,540,910  | 3 | 0 | 3 | 1 |
| Case 99 | 9 | 24,545,513  | 24,687,157  | 3 | 1 | 4 | 0 |
| Case 99 | 9 | 24,689,992  | 26,316,310  | 3 | 0 | 3 | 1 |
| Case 99 | 9 | 26,317,242  | 26,657,127  | 3 | 1 | 4 | 0 |
| Case 99 | 9 | 26,658,407  | 27,325,452  | 3 | 0 | 3 | 1 |
| Case 99 | 9 | 27,326,060  | 27,516,640  | 3 | 1 | 4 | 0 |
| Case 99 | 9 | 27,519,173  | 27,808,448  | 3 | 0 | 3 | 1 |
| Case 99 | 9 | 27,819,540  | 28,188,444  | 3 | 1 | 4 | 0 |
| Case 99 | 9 | 28,194,546  | 32,570,989  | 3 | 0 | 3 | 1 |
| Case 99 | 9 | 32,572,932  | 32,596,952  | 2 | 2 | 4 | 0 |
| Case 99 | 9 | 32,601,501  | 33,245,076  | 3 | 2 | 5 | 0 |
| Case 99 | 9 | 33,246,639  | 46,944,322  | 2 | 2 | 4 | 0 |
| Case 99 | 9 | 65,629,772  | 108,680,292 | 2 | 2 | 4 | 0 |
| Case 99 | 9 | 108,681,246 | 109,787,178 | 3 | 2 | 5 | 0 |
| Case 99 | 9 | 109,793,425 | 116,468,123 | 2 | 2 | 4 | 0 |
| Case 99 | 9 | 116,468,685 | 130,166,017 | 3 | 1 | 4 | 0 |
| Case 99 | 9 | 130,166,024 | 131,073,176 | 2 | 1 | 3 | 0 |
| Case 99 | 9 | 131,073,210 | 131,741,633 | 3 | 1 | 4 | 0 |
| Case 99 | 9 | 131,743,585 | 132,552,206 | 2 | 1 | 3 | 0 |
| Case 99 | 9 | 132,556,974 | 133,488,494 | 3 | 1 | 4 | 0 |
| Case 99 | 9 | 133,490,496 | 137,373,598 | 2 | 2 | 4 | 0 |
| Case 99 | 9 | 137,374,584 | 139,110,556 | 3 | 2 | 5 | 0 |
| Case 99 | 9 | 139,110,652 | 139,278,407 | 2 | 2 | 4 | 0 |
| Case 99 | 9 | 139,279,173 | 139,390,546 | 3 | 2 | 5 | 0 |

|         |    |             |             |   |   |   |   |
|---------|----|-------------|-------------|---|---|---|---|
| Case 99 | 9  | 139,390,585 | 140,498,789 | 2 | 2 | 4 | 0 |
| Case 99 | 9  | 140,507,366 | 141,066,491 | 3 | 2 | 5 | 0 |
| Case 99 | 10 | 98,087      | 126,070     | 4 | 1 | 5 | 0 |
| Case 99 | 10 | 135,656     | 1,436,858   | 5 | 1 | 6 | 0 |
| Case 99 | 10 | 1,443,016   | 1,443,016   | 2 | 2 | 4 | 0 |
| Case 99 | 10 | 1,443,180   | 5,147,909   | 4 | 2 | 6 | 0 |
| Case 99 | 10 | 5,148,387   | 35,870,714  | 2 | 2 | 4 | 0 |
| Case 99 | 10 | 35,874,895  | 37,203,527  | 2 | 1 | 3 | 0 |
| Case 99 | 10 | 37,207,701  | 37,231,470  | 2 | 2 | 4 | 0 |
| Case 99 | 10 | 37,232,329  | 38,110,813  | 4 | 2 | 6 | 0 |
| Case 99 | 10 | 38,116,665  | 39,097,912  | 2 | 2 | 4 | 0 |
| Case 99 | 10 | 42,436,301  | 56,018,508  | 2 | 2 | 4 | 0 |
| Case 99 | 10 | 56,019,051  | 60,271,824  | 2 | 1 | 3 | 0 |
| Case 99 | 10 | 60,273,034  | 68,346,959  | 2 | 2 | 4 | 0 |
| Case 99 | 10 | 68,348,941  | 68,393,666  | 2 | 0 | 2 | 1 |
| Case 99 | 10 | 68,395,924  | 68,396,283  | 4 | 2 | 6 | 0 |
| Case 99 | 10 | 68,397,199  | 68,429,563  | 2 | 2 | 4 | 0 |
| Case 99 | 10 | 68,435,662  | 69,246,472  | 3 | 0 | 3 | 1 |
| Case 99 | 10 | 69,247,842  | 89,820,152  | 2 | 2 | 4 | 0 |
| Case 99 | 10 | 89,821,646  | 90,583,092  | 3 | 2 | 5 | 0 |
| Case 99 | 10 | 90,585,566  | 129,899,523 | 2 | 2 | 4 | 0 |
| Case 99 | 10 | 129,899,578 | 130,152,724 | 3 | 2 | 5 | 0 |
| Case 99 | 10 | 130,153,428 | 135,477,883 | 2 | 2 | 4 | 0 |
| Case 99 | 11 | 193,146     | 532,923     | 2 | 1 | 3 | 0 |
| Case 99 | 11 | 533,357     | 563,598     | 1 | 1 | 2 | 0 |
| Case 99 | 11 | 565,840     | 1,015,786   | 2 | 1 | 3 | 0 |
| Case 99 | 11 | 1,015,828   | 1,019,413   | 3 | 2 | 5 | 0 |
| Case 99 | 11 | 1,020,722   | 1,271,353   | 2 | 1 | 3 | 0 |
| Case 99 | 11 | 1,272,554   | 1,620,784   | 3 | 0 | 3 | 1 |
| Case 99 | 11 | 1,625,363   | 3,856,553   | 2 | 1 | 3 | 0 |
| Case 99 | 11 | 3,856,668   | 6,190,634   | 2 | 2 | 4 | 0 |
| Case 99 | 11 | 6,190,635   | 6,578,792   | 4 | 0 | 4 | 1 |
| Case 99 | 11 | 6,579,106   | 6,647,497   | 3 | 0 | 3 | 1 |
| Case 99 | 11 | 6,647,554   | 7,712,523   | 2 | 2 | 4 | 0 |
| Case 99 | 11 | 7,712,561   | 7,846,767   | 2 | 1 | 3 | 0 |
| Case 99 | 11 | 7,846,941   | 8,414,229   | 2 | 2 | 4 | 0 |
| Case 99 | 11 | 8,416,123   | 10,375,899  | 2 | 1 | 3 | 0 |
| Case 99 | 11 | 10,377,258  | 14,277,230  | 2 | 2 | 4 | 0 |
| Case 99 | 11 | 14,279,404  | 15,274,990  | 2 | 1 | 3 | 0 |
| Case 99 | 11 | 15,275,070  | 17,008,605  | 2 | 2 | 4 | 0 |
| Case 99 | 11 | 17,008,644  | 17,394,597  | 2 | 1 | 3 | 0 |
| Case 99 | 11 | 17,395,760  | 18,344,064  | 2 | 2 | 4 | 0 |
| Case 99 | 11 | 18,347,536  | 18,643,758  | 2 | 1 | 3 | 0 |
| Case 99 | 11 | 18,645,843  | 20,163,318  | 2 | 2 | 4 | 0 |
| Case 99 | 11 | 20,164,332  | 20,574,079  | 2 | 1 | 3 | 0 |
| Case 99 | 11 | 20,579,466  | 23,160,403  | 2 | 2 | 4 | 0 |
| Case 99 | 11 | 23,161,082  | 26,438,486  | 2 | 1 | 3 | 0 |
| Case 99 | 11 | 26,439,871  | 27,221,248  | 2 | 2 | 4 | 0 |
| Case 99 | 11 | 27,225,418  | 35,244,643  | 3 | 2 | 5 | 0 |
| Case 99 | 11 | 35,245,907  | 51,591,253  | 2 | 2 | 4 | 0 |
| Case 99 | 11 | 54,794,237  | 72,327,525  | 2 | 2 | 4 | 0 |
| Case 99 | 11 | 72,330,446  | 77,300,545  | 3 | 2 | 5 | 0 |
| Case 99 | 11 | 77,301,121  | 78,068,039  | 4 | 2 | 6 | 0 |
| Case 99 | 11 | 78,091,150  | 91,988,615  | 2 | 2 | 4 | 0 |
| Case 99 | 11 | 91,988,838  | 92,881,044  | 3 | 1 | 4 | 0 |
| Case 99 | 11 | 92,881,896  | 93,184,074  | 2 | 1 | 3 | 0 |
| Case 99 | 11 | 93,206,181  | 93,331,287  | 3 | 1 | 4 | 0 |
| Case 99 | 11 | 93,332,312  | 93,596,420  | 2 | 1 | 3 | 0 |
| Case 99 | 11 | 93,596,599  | 94,539,045  | 3 | 1 | 4 | 0 |
| Case 99 | 11 | 94,539,347  | 94,759,940  | 2 | 1 | 3 | 0 |
| Case 99 | 11 | 94,760,153  | 105,815,878 | 2 | 2 | 4 | 0 |

|         |    |             |             |   |   |   |   |
|---------|----|-------------|-------------|---|---|---|---|
| Case 99 | 11 | 105,837,044 | 107,170,877 | 3 | 1 | 4 | 0 |
| Case 99 | 11 | 107,177,440 | 109,538,110 | 2 | 1 | 3 | 0 |
| Case 99 | 11 | 109,559,457 | 111,196,858 | 3 | 1 | 4 | 0 |
| Case 99 | 11 | 111,197,776 | 112,093,482 | 3 | 0 | 3 | 1 |
| Case 99 | 11 | 112,095,039 | 112,489,212 | 3 | 1 | 4 | 0 |
| Case 99 | 11 | 112,491,227 | 112,753,107 | 2 | 2 | 4 | 0 |
| Case 99 | 11 | 112,759,458 | 113,235,565 | 3 | 1 | 4 | 0 |
| Case 99 | 11 | 113,235,577 | 113,278,447 | 2 | 1 | 3 | 0 |
| Case 99 | 11 | 113,278,764 | 113,451,765 | 3 | 1 | 4 | 0 |
| Case 99 | 11 | 113,452,593 | 114,139,205 | 3 | 2 | 5 | 0 |
| Case 99 | 11 | 114,151,577 | 115,769,470 | 2 | 2 | 4 | 0 |
| Case 99 | 11 | 115,771,144 | 116,693,871 | 3 | 2 | 5 | 0 |
| Case 99 | 11 | 116,693,892 | 118,569,067 | 4 | 2 | 6 | 0 |
| Case 99 | 11 | 118,572,267 | 119,605,480 | 6 | 1 | 7 | 0 |
| Case 99 | 11 | 119,620,940 | 123,919,128 | 3 | 1 | 4 | 0 |
| Case 99 | 11 | 123,921,479 | 124,016,065 | 3 | 0 | 3 | 1 |
| Case 99 | 11 | 124,016,301 | 124,636,373 | 3 | 1 | 4 | 0 |
| Case 99 | 11 | 124,637,227 | 124,789,755 | 2 | 1 | 3 | 0 |
| Case 99 | 11 | 124,789,756 | 125,812,350 | 3 | 1 | 4 | 0 |
| Case 99 | 11 | 125,814,198 | 126,004,075 | 2 | 2 | 4 | 0 |
| Case 99 | 11 | 126,004,713 | 126,466,129 | 3 | 2 | 5 | 0 |
| Case 99 | 11 | 126,467,667 | 128,844,481 | 4 | 2 | 6 | 0 |
| Case 99 | 11 | 128,844,513 | 130,529,219 | 6 | 1 | 7 | 0 |
| Case 99 | 11 | 130,535,437 | 134,020,848 | 3 | 1 | 4 | 0 |
| Case 99 | 11 | 134,021,859 | 134,208,765 | 3 | 0 | 3 | 1 |
| Case 99 | 11 | 134,208,908 | 134,934,063 | 3 | 1 | 4 | 0 |
| Case 99 | 12 | 191,619     | 1,750,047   | 3 | 1 | 4 | 0 |
| Case 99 | 12 | 1,753,225   | 2,128,982   | 2 | 2 | 4 | 0 |
| Case 99 | 12 | 2,129,773   | 2,685,132   | 3 | 2 | 5 | 0 |
| Case 99 | 12 | 2,687,764   | 3,169,493   | 2 | 2 | 4 | 0 |
| Case 99 | 12 | 3,170,027   | 3,996,234   | 3 | 2 | 5 | 0 |
| Case 99 | 12 | 3,997,731   | 4,791,451   | 2 | 2 | 4 | 0 |
| Case 99 | 12 | 4,791,842   | 5,610,470   | 3 | 2 | 5 | 0 |
| Case 99 | 12 | 5,611,799   | 9,814,256   | 2 | 2 | 4 | 0 |
| Case 99 | 12 | 9,815,305   | 11,783,511  | 3 | 1 | 4 | 0 |
| Case 99 | 12 | 11,784,641  | 12,008,864  | 2 | 2 | 4 | 0 |
| Case 99 | 12 | 12,009,741  | 12,550,539  | 3 | 1 | 4 | 0 |
| Case 99 | 12 | 12,550,610  | 12,655,443  | 2 | 1 | 3 | 0 |
| Case 99 | 12 | 12,659,894  | 13,232,878  | 2 | 2 | 4 | 0 |
| Case 99 | 12 | 13,233,561  | 14,261,873  | 3 | 2 | 5 | 0 |
| Case 99 | 12 | 14,262,889  | 15,089,416  | 2 | 2 | 4 | 0 |
| Case 99 | 12 | 15,090,927  | 15,661,163  | 3 | 2 | 5 | 0 |
| Case 99 | 12 | 15,661,182  | 16,285,538  | 2 | 2 | 4 | 0 |
| Case 99 | 12 | 16,285,718  | 17,530,450  | 3 | 2 | 5 | 0 |
| Case 99 | 12 | 17,533,980  | 17,682,316  | 2 | 1 | 3 | 0 |
| Case 99 | 12 | 17,683,517  | 22,001,088  | 3 | 1 | 4 | 0 |
| Case 99 | 12 | 22,001,093  | 22,174,952  | 3 | 2 | 5 | 0 |
| Case 99 | 12 | 22,187,526  | 22,270,850  | 2 | 1 | 3 | 0 |
| Case 99 | 12 | 22,272,380  | 22,396,257  | 2 | 2 | 4 | 0 |
| Case 99 | 12 | 22,396,413  | 25,777,788  | 3 | 1 | 4 | 0 |
| Case 99 | 12 | 25,778,292  | 26,379,532  | 3 | 2 | 5 | 0 |
| Case 99 | 12 | 26,383,678  | 27,841,354  | 2 | 2 | 4 | 0 |
| Case 99 | 12 | 27,842,063  | 28,039,023  | 2 | 1 | 3 | 0 |
| Case 99 | 12 | 28,045,376  | 29,299,549  | 3 | 2 | 5 | 0 |
| Case 99 | 12 | 29,314,009  | 29,458,556  | 2 | 1 | 3 | 0 |
| Case 99 | 12 | 29,464,822  | 29,772,290  | 3 | 1 | 4 | 0 |
| Case 99 | 12 | 29,776,054  | 31,816,623  | 2 | 2 | 4 | 0 |
| Case 99 | 12 | 31,817,163  | 31,935,769  | 2 | 1 | 3 | 0 |
| Case 99 | 12 | 31,939,113  | 32,156,306  | 2 | 2 | 4 | 0 |
| Case 99 | 12 | 32,156,716  | 32,421,887  | 2 | 1 | 3 | 0 |
| Case 99 | 12 | 32,422,835  | 33,178,969  | 2 | 2 | 4 | 0 |

|         |    |             |             |   |   |   |   |
|---------|----|-------------|-------------|---|---|---|---|
| Case 99 | 12 | 33,181,226  | 34,179,233  | 3 | 1 | 4 | 0 |
| Case 99 | 12 | 34,180,836  | 34,853,011  | 2 | 1 | 3 | 0 |
| Case 99 | 12 | 37,876,400  | 39,302,862  | 2 | 1 | 3 | 0 |
| Case 99 | 12 | 39,309,714  | 40,371,492  | 2 | 2 | 4 | 0 |
| Case 99 | 12 | 40,378,647  | 40,460,938  | 3 | 1 | 4 | 0 |
| Case 99 | 12 | 40,464,509  | 40,893,988  | 2 | 1 | 3 | 0 |
| Case 99 | 12 | 40,894,172  | 42,008,139  | 3 | 1 | 4 | 0 |
| Case 99 | 12 | 42,009,312  | 42,582,875  | 2 | 2 | 4 | 0 |
| Case 99 | 12 | 42,589,621  | 43,000,341  | 3 | 1 | 4 | 0 |
| Case 99 | 12 | 43,001,116  | 43,243,922  | 2 | 2 | 4 | 0 |
| Case 99 | 12 | 43,252,719  | 45,321,380  | 3 | 1 | 4 | 0 |
| Case 99 | 12 | 45,322,922  | 47,607,017  | 2 | 2 | 4 | 0 |
| Case 99 | 12 | 47,607,299  | 47,763,331  | 3 | 1 | 4 | 0 |
| Case 99 | 12 | 47,763,673  | 48,293,037  | 2 | 2 | 4 | 0 |
| Case 99 | 12 | 48,293,716  | 49,888,675  | 3 | 1 | 4 | 0 |
| Case 99 | 12 | 49,888,776  | 52,532,230  | 2 | 2 | 4 | 0 |
| Case 99 | 12 | 52,533,259  | 53,225,280  | 3 | 1 | 4 | 0 |
| Case 99 | 12 | 53,225,282  | 53,242,671  | 2 | 1 | 3 | 0 |
| Case 99 | 12 | 53,242,695  | 53,437,892  | 3 | 2 | 5 | 0 |
| Case 99 | 12 | 53,439,537  | 53,509,933  | 2 | 1 | 3 | 0 |
| Case 99 | 12 | 53,509,948  | 54,067,827  | 2 | 2 | 4 | 0 |
| Case 99 | 12 | 54,069,803  | 54,649,941  | 3 | 2 | 5 | 0 |
| Case 99 | 12 | 54,651,471  | 55,344,024  | 2 | 2 | 4 | 0 |
| Case 99 | 12 | 55,346,235  | 62,994,433  | 3 | 1 | 4 | 0 |
| Case 99 | 12 | 62,995,984  | 63,486,387  | 2 | 2 | 4 | 0 |
| Case 99 | 12 | 63,488,401  | 64,717,148  | 3 | 1 | 4 | 0 |
| Case 99 | 12 | 64,717,817  | 65,664,975  | 2 | 2 | 4 | 0 |
| Case 99 | 12 | 65,670,821  | 66,480,445  | 3 | 2 | 5 | 0 |
| Case 99 | 12 | 66,506,631  | 66,597,646  | 2 | 1 | 3 | 0 |
| Case 99 | 12 | 66,599,144  | 87,922,782  | 3 | 1 | 4 | 0 |
| Case 99 | 12 | 87,931,066  | 89,917,365  | 2 | 2 | 4 | 0 |
| Case 99 | 12 | 89,917,437  | 92,592,701  | 3 | 2 | 5 | 0 |
| Case 99 | 12 | 92,593,517  | 92,991,145  | 2 | 2 | 4 | 0 |
| Case 99 | 12 | 92,995,611  | 93,796,425  | 3 | 1 | 4 | 0 |
| Case 99 | 12 | 93,796,658  | 94,470,337  | 2 | 2 | 4 | 0 |
| Case 99 | 12 | 94,471,246  | 96,842,104  | 3 | 1 | 4 | 0 |
| Case 99 | 12 | 96,856,310  | 98,152,393  | 2 | 2 | 4 | 0 |
| Case 99 | 12 | 98,167,703  | 98,576,565  | 3 | 2 | 5 | 0 |
| Case 99 | 12 | 98,577,304  | 99,060,123  | 2 | 2 | 4 | 0 |
| Case 99 | 12 | 99,060,134  | 99,726,416  | 3 | 1 | 4 | 0 |
| Case 99 | 12 | 99,726,603  | 99,837,070  | 2 | 2 | 4 | 0 |
| Case 99 | 12 | 99,837,570  | 99,991,075  | 2 | 0 | 2 | 1 |
| Case 99 | 12 | 100,002,686 | 100,004,428 | 4 | 2 | 6 | 0 |
| Case 99 | 12 | 100,004,829 | 100,210,357 | 2 | 2 | 4 | 0 |
| Case 99 | 12 | 100,215,417 | 102,064,058 | 3 | 1 | 4 | 0 |
| Case 99 | 12 | 102,064,518 | 102,327,309 | 2 | 2 | 4 | 0 |
| Case 99 | 12 | 102,330,758 | 102,600,232 | 2 | 1 | 3 | 0 |
| Case 99 | 12 | 102,616,650 | 103,237,557 | 3 | 2 | 5 | 0 |
| Case 99 | 12 | 103,238,017 | 103,799,467 | 2 | 2 | 4 | 0 |
| Case 99 | 12 | 103,800,290 | 104,144,426 | 3 | 1 | 4 | 0 |
| Case 99 | 12 | 104,144,835 | 104,480,704 | 3 | 2 | 5 | 0 |
| Case 99 | 12 | 104,485,370 | 104,815,303 | 2 | 1 | 3 | 0 |
| Case 99 | 12 | 104,818,192 | 105,324,910 | 3 | 2 | 5 | 0 |
| Case 99 | 12 | 105,328,199 | 105,567,572 | 2 | 2 | 4 | 0 |
| Case 99 | 12 | 105,567,611 | 106,432,190 | 3 | 2 | 5 | 0 |
| Case 99 | 12 | 106,436,519 | 106,464,310 | 2 | 2 | 4 | 0 |
| Case 99 | 12 | 106,467,656 | 107,391,708 | 3 | 1 | 4 | 0 |
| Case 99 | 12 | 107,394,048 | 107,725,814 | 2 | 1 | 3 | 0 |
| Case 99 | 12 | 107,730,867 | 108,696,850 | 3 | 2 | 5 | 0 |
| Case 99 | 12 | 108,697,894 | 114,349,771 | 2 | 2 | 4 | 0 |
| Case 99 | 12 | 114,351,555 | 115,138,644 | 3 | 1 | 4 | 0 |

|         |    |             |             |   |   |   |   |
|---------|----|-------------|-------------|---|---|---|---|
| Case 99 | 12 | 115,139,777 | 115,229,953 | 2 | 2 | 4 | 0 |
| Case 99 | 12 | 115,231,633 | 116,075,010 | 3 | 2 | 5 | 0 |
| Case 99 | 12 | 116,075,435 | 117,306,205 | 2 | 2 | 4 | 0 |
| Case 99 | 12 | 117,307,117 | 121,175,678 | 3 | 1 | 4 | 0 |
| Case 99 | 12 | 121,175,696 | 122,353,796 | 2 | 1 | 3 | 0 |
| Case 99 | 12 | 122,353,841 | 124,111,999 | 3 | 1 | 4 | 0 |
| Case 99 | 12 | 124,114,943 | 125,396,218 | 2 | 2 | 4 | 0 |
| Case 99 | 12 | 125,398,309 | 132,303,456 | 3 | 1 | 4 | 0 |
| Case 99 | 12 | 132,306,125 | 132,413,719 | 2 | 1 | 3 | 0 |
| Case 99 | 12 | 132,416,781 | 132,621,624 | 2 | 2 | 4 | 0 |
| Case 99 | 12 | 132,623,473 | 132,997,546 | 2 | 1 | 3 | 0 |
| Case 99 | 12 | 133,008,773 | 133,351,746 | 3 | 1 | 4 | 0 |
| Case 99 | 12 | 133,351,809 | 133,810,935 | 2 | 1 | 3 | 0 |
| Case 99 | 13 | 19,058,717  | 20,025,305  | 3 | 1 | 4 | 0 |
| Case 99 | 13 | 20,025,309  | 47,177,703  | 4 | 1 | 5 | 0 |
| Case 99 | 13 | 47,180,671  | 47,180,671  | 2 | 2 | 4 | 0 |
| Case 99 | 13 | 47,186,905  | 47,631,920  | 4 | 2 | 6 | 0 |
| Case 99 | 13 | 47,639,430  | 54,180,316  | 4 | 1 | 5 | 0 |
| Case 99 | 13 | 54,182,173  | 54,218,225  | 5 | 1 | 6 | 0 |
| Case 99 | 13 | 54,228,688  | 54,448,513  | 6 | 1 | 7 | 0 |
| Case 99 | 13 | 54,453,811  | 54,458,271  | 3 | 1 | 4 | 0 |
| Case 99 | 13 | 54,458,331  | 80,411,610  | 4 | 1 | 5 | 0 |
| Case 99 | 13 | 80,421,340  | 101,364,651 | 5 | 1 | 6 | 0 |
| Case 99 | 13 | 101,369,271 | 111,062,680 | 6 | 1 | 7 | 0 |
| Case 99 | 13 | 111,064,159 | 111,064,159 | 0 | 0 | 0 | 0 |
| Case 99 | 13 | 111,067,499 | 115,103,529 | 5 | 1 | 6 | 0 |
| Case 99 | 14 | 19,280,733  | 37,018,307  | 2 | 2 | 4 | 0 |
| Case 99 | 14 | 37,019,703  | 37,241,800  | 3 | 2 | 5 | 0 |
| Case 99 | 14 | 37,247,672  | 50,100,463  | 2 | 2 | 4 | 0 |
| Case 99 | 14 | 50,100,501  | 50,171,626  | 3 | 0 | 3 | 1 |
| Case 99 | 14 | 50,175,886  | 73,664,853  | 2 | 2 | 4 | 0 |
| Case 99 | 14 | 73,672,831  | 73,731,385  | 2 | 1 | 3 | 0 |
| Case 99 | 14 | 73,732,103  | 107,287,663 | 2 | 2 | 4 | 0 |
| Case 99 | 15 | 20,034,919  | 38,228,620  | 2 | 2 | 4 | 0 |
| Case 99 | 15 | 38,228,992  | 39,415,412  | 2 | 1 | 3 | 0 |
| Case 99 | 15 | 39,421,902  | 39,742,366  | 3 | 2 | 5 | 0 |
| Case 99 | 15 | 39,742,977  | 41,148,092  | 2 | 2 | 4 | 0 |
| Case 99 | 15 | 41,148,138  | 42,107,924  | 3 | 2 | 5 | 0 |
| Case 99 | 15 | 42,108,794  | 42,192,040  | 2 | 1 | 3 | 0 |
| Case 99 | 15 | 42,192,923  | 43,798,039  | 2 | 2 | 4 | 0 |
| Case 99 | 15 | 43,804,347  | 48,539,196  | 2 | 1 | 3 | 0 |
| Case 99 | 15 | 48,539,587  | 48,806,539  | 3 | 2 | 5 | 0 |
| Case 99 | 15 | 48,807,637  | 61,011,271  | 2 | 2 | 4 | 0 |
| Case 99 | 15 | 61,012,259  | 64,607,472  | 3 | 2 | 5 | 0 |
| Case 99 | 15 | 64,627,303  | 65,682,635  | 2 | 2 | 4 | 0 |
| Case 99 | 15 | 65,684,513  | 68,847,991  | 3 | 2 | 5 | 0 |
| Case 99 | 15 | 68,850,513  | 73,357,951  | 2 | 2 | 4 | 0 |
| Case 99 | 15 | 73,392,160  | 73,528,769  | 3 | 0 | 3 | 1 |
| Case 99 | 15 | 73,536,691  | 81,080,925  | 2 | 2 | 4 | 0 |
| Case 99 | 15 | 81,081,617  | 81,624,974  | 2 | 1 | 3 | 0 |
| Case 99 | 15 | 81,625,028  | 97,888,848  | 2 | 2 | 4 | 0 |
| Case 99 | 15 | 97,890,571  | 100,237,682 | 2 | 1 | 3 | 0 |
| Case 99 | 15 | 100,244,593 | 100,445,280 | 3 | 0 | 3 | 1 |
| Case 99 | 15 | 100,445,766 | 102,461,162 | 2 | 1 | 3 | 0 |
| Case 99 | 16 | 88,165      | 2,303,496   | 3 | 1 | 4 | 0 |
| Case 99 | 16 | 2,305,539   | 3,526,259   | 4 | 1 | 5 | 0 |
| Case 99 | 16 | 3,526,336   | 3,536,444   | 2 | 2 | 4 | 0 |
| Case 99 | 16 | 3,536,872   | 4,557,846   | 3 | 1 | 4 | 0 |
| Case 99 | 16 | 4,557,949   | 4,745,146   | 3 | 0 | 3 | 1 |
| Case 99 | 16 | 4,746,392   | 4,815,881   | 2 | 1 | 3 | 0 |
| Case 99 | 16 | 4,819,496   | 5,275,559   | 3 | 1 | 4 | 0 |

|         |    |            |            |   |   |   |   |
|---------|----|------------|------------|---|---|---|---|
| Case 99 | 16 | 5,276,231  | 6,455,470  | 2 | 1 | 3 | 0 |
| Case 99 | 16 | 6,456,057  | 6,569,372  | 2 | 2 | 4 | 0 |
| Case 99 | 16 | 6,570,248  | 6,700,500  | 2 | 1 | 3 | 0 |
| Case 99 | 16 | 6,701,566  | 6,780,889  | 2 | 2 | 4 | 0 |
| Case 99 | 16 | 6,781,701  | 7,147,015  | 2 | 1 | 3 | 0 |
| Case 99 | 16 | 7,147,403  | 7,568,296  | 2 | 2 | 4 | 0 |
| Case 99 | 16 | 7,571,292  | 8,019,499  | 2 | 1 | 3 | 0 |
| Case 99 | 16 | 8,020,987  | 8,459,229  | 2 | 2 | 4 | 0 |
| Case 99 | 16 | 8,467,728  | 8,830,826  | 2 | 1 | 3 | 0 |
| Case 99 | 16 | 8,834,816  | 9,738,833  | 3 | 1 | 4 | 0 |
| Case 99 | 16 | 9,738,961  | 10,027,116 | 3 | 2 | 5 | 0 |
| Case 99 | 16 | 10,031,838 | 12,334,807 | 6 | 1 | 7 | 0 |
| Case 99 | 16 | 12,335,651 | 12,394,856 | 3 | 1 | 4 | 0 |
| Case 99 | 16 | 12,399,075 | 13,640,858 | 3 | 2 | 5 | 0 |
| Case 99 | 16 | 13,643,974 | 18,539,704 | 2 | 2 | 4 | 0 |
| Case 99 | 16 | 18,601,266 | 20,970,520 | 3 | 1 | 4 | 0 |
| Case 99 | 16 | 20,970,523 | 22,826,046 | 3 | 2 | 5 | 0 |
| Case 99 | 16 | 22,826,115 | 22,870,708 | 2 | 2 | 4 | 0 |
| Case 99 | 16 | 22,871,312 | 24,427,148 | 4 | 2 | 6 | 0 |
| Case 99 | 16 | 24,429,827 | 25,049,764 | 6 | 1 | 7 | 0 |
| Case 99 | 16 | 25,052,051 | 26,660,430 | 2 | 1 | 3 | 0 |
| Case 99 | 16 | 26,660,902 | 28,601,802 | 2 | 2 | 4 | 0 |
| Case 99 | 16 | 28,602,991 | 28,990,587 | 3 | 1 | 4 | 0 |
| Case 99 | 16 | 28,990,588 | 29,412,503 | 2 | 1 | 3 | 0 |
| Case 99 | 16 | 29,595,483 | 32,941,309 | 3 | 2 | 5 | 0 |
| Case 99 | 16 | 33,460,718 | 35,285,582 | 2 | 1 | 3 | 0 |
| Case 99 | 16 | 46,450,037 | 48,479,935 | 2 | 1 | 3 | 0 |
| Case 99 | 16 | 48,488,527 | 48,846,170 | 1 | 1 | 2 | 0 |
| Case 99 | 16 | 48,851,380 | 53,190,992 | 2 | 1 | 3 | 0 |
| Case 99 | 16 | 53,191,116 | 53,476,600 | 1 | 1 | 2 | 0 |
| Case 99 | 16 | 53,479,531 | 53,967,952 | 2 | 1 | 3 | 0 |
| Case 99 | 16 | 53,973,807 | 54,038,336 | 1 | 1 | 2 | 0 |
| Case 99 | 16 | 54,039,486 | 55,208,351 | 2 | 1 | 3 | 0 |
| Case 99 | 16 | 55,211,634 | 55,455,982 | 2 | 2 | 4 | 0 |
| Case 99 | 16 | 55,460,657 | 56,984,763 | 2 | 1 | 3 | 0 |
| Case 99 | 16 | 56,988,044 | 57,059,999 | 1 | 1 | 2 | 0 |
| Case 99 | 16 | 57,060,009 | 57,171,141 | 2 | 1 | 3 | 0 |
| Case 99 | 16 | 57,171,397 | 57,440,896 | 1 | 1 | 2 | 0 |
| Case 99 | 16 | 57,441,407 | 57,521,274 | 2 | 1 | 3 | 0 |
| Case 99 | 16 | 57,531,633 | 57,702,274 | 1 | 1 | 2 | 0 |
| Case 99 | 16 | 57,702,473 | 57,762,432 | 2 | 1 | 3 | 0 |
| Case 99 | 16 | 57,762,486 | 57,912,304 | 1 | 1 | 2 | 0 |
| Case 99 | 16 | 57,912,679 | 59,020,442 | 2 | 1 | 3 | 0 |
| Case 99 | 16 | 59,022,389 | 61,116,730 | 1 | 1 | 2 | 0 |
| Case 99 | 16 | 61,117,063 | 62,642,333 | 2 | 1 | 3 | 0 |
| Case 99 | 16 | 62,642,846 | 64,025,960 | 1 | 1 | 2 | 0 |
| Case 99 | 16 | 64,027,148 | 67,220,457 | 2 | 1 | 3 | 0 |
| Case 99 | 16 | 67,220,741 | 67,244,036 | 1 | 1 | 2 | 0 |
| Case 99 | 16 | 67,247,444 | 68,024,019 | 2 | 1 | 3 | 0 |
| Case 99 | 16 | 68,024,732 | 68,155,996 | 1 | 1 | 2 | 0 |
| Case 99 | 16 | 68,156,067 | 68,405,061 | 2 | 1 | 3 | 0 |
| Case 99 | 16 | 68,405,079 | 68,839,263 | 1 | 1 | 2 | 0 |
| Case 99 | 16 | 68,839,293 | 69,559,696 | 2 | 1 | 3 | 0 |
| Case 99 | 16 | 69,563,842 | 70,154,486 | 3 | 0 | 3 | 1 |
| Case 99 | 16 | 70,166,140 | 70,284,720 | 3 | 1 | 4 | 0 |
| Case 99 | 16 | 70,284,784 | 70,464,818 | 2 | 1 | 3 | 0 |
| Case 99 | 16 | 70,467,819 | 70,694,076 | 1 | 1 | 2 | 0 |
| Case 99 | 16 | 70,697,927 | 70,841,656 | 2 | 1 | 3 | 0 |
| Case 99 | 16 | 70,841,658 | 71,218,789 | 4 | 1 | 5 | 0 |
| Case 99 | 16 | 71,220,668 | 71,371,993 | 1 | 1 | 2 | 0 |
| Case 99 | 16 | 71,373,048 | 72,822,678 | 2 | 1 | 3 | 0 |

|         |    |            |            |   |   |   |   |
|---------|----|------------|------------|---|---|---|---|
| Case 99 | 16 | 72,827,202 | 73,774,321 | 2 | 2 | 4 | 0 |
| Case 99 | 16 | 73,774,855 | 73,829,111 | 2 | 1 | 3 | 0 |
| Case 99 | 16 | 73,830,476 | 74,186,894 | 1 | 1 | 2 | 0 |
| Case 99 | 16 | 74,189,714 | 75,563,352 | 2 | 1 | 3 | 0 |
| Case 99 | 16 | 75,563,360 | 75,840,629 | 1 | 1 | 2 | 0 |
| Case 99 | 16 | 75,853,626 | 76,326,496 | 2 | 1 | 3 | 0 |
| Case 99 | 16 | 76,329,702 | 76,523,717 | 1 | 1 | 2 | 0 |
| Case 99 | 16 | 76,523,755 | 77,297,193 | 2 | 1 | 3 | 0 |
| Case 99 | 16 | 77,302,778 | 77,310,496 | 1 | 1 | 2 | 0 |
| Case 99 | 16 | 77,310,808 | 77,398,263 | 2 | 1 | 3 | 0 |
| Case 99 | 16 | 77,400,082 | 77,622,536 | 2 | 2 | 4 | 0 |
| Case 99 | 16 | 77,623,684 | 77,912,966 | 2 | 1 | 3 | 0 |
| Case 99 | 16 | 77,914,473 | 78,869,972 | 2 | 2 | 4 | 0 |
| Case 99 | 16 | 78,870,240 | 78,985,040 | 2 | 0 | 2 | 1 |
| Case 99 | 16 | 78,985,073 | 78,985,073 | 4 | 2 | 6 | 0 |
| Case 99 | 16 | 78,986,071 | 79,051,997 | 2 | 2 | 4 | 0 |
| Case 99 | 16 | 79,053,610 | 79,151,251 | 2 | 1 | 3 | 0 |
| Case 99 | 16 | 79,152,089 | 79,238,685 | 1 | 1 | 2 | 0 |
| Case 99 | 16 | 79,238,854 | 81,324,160 | 2 | 1 | 3 | 0 |
| Case 99 | 16 | 81,324,324 | 81,580,088 | 1 | 1 | 2 | 0 |
| Case 99 | 16 | 81,588,142 | 82,306,343 | 2 | 1 | 3 | 0 |
| Case 99 | 16 | 82,306,551 | 82,775,107 | 2 | 2 | 4 | 0 |
| Case 99 | 16 | 82,776,234 | 83,005,708 | 2 | 1 | 3 | 0 |
| Case 99 | 16 | 83,007,449 | 83,226,661 | 1 | 1 | 2 | 0 |
| Case 99 | 16 | 83,227,014 | 83,414,018 | 2 | 1 | 3 | 0 |
| Case 99 | 16 | 83,414,398 | 83,664,301 | 2 | 2 | 4 | 0 |
| Case 99 | 16 | 83,664,581 | 84,213,187 | 2 | 1 | 3 | 0 |
| Case 99 | 16 | 84,213,211 | 84,256,130 | 1 | 1 | 2 | 0 |
| Case 99 | 16 | 84,256,201 | 84,724,256 | 2 | 1 | 3 | 0 |
| Case 99 | 16 | 84,724,295 | 84,832,998 | 1 | 1 | 2 | 0 |
| Case 99 | 16 | 84,839,954 | 86,680,658 | 2 | 1 | 3 | 0 |
| Case 99 | 16 | 86,681,031 | 87,337,543 | 2 | 2 | 4 | 0 |
| Case 99 | 16 | 87,339,390 | 87,437,107 | 2 | 1 | 3 | 0 |
| Case 99 | 16 | 87,439,169 | 87,678,248 | 1 | 1 | 2 | 0 |
| Case 99 | 16 | 87,678,302 | 88,332,479 | 2 | 1 | 3 | 0 |
| Case 99 | 16 | 88,338,467 | 88,637,896 | 1 | 1 | 2 | 0 |
| Case 99 | 16 | 88,637,970 | 88,701,780 | 2 | 1 | 3 | 0 |
| Case 99 | 16 | 88,704,770 | 88,898,407 | 1 | 1 | 2 | 0 |
| Case 99 | 16 | 88,901,632 | 89,371,704 | 2 | 1 | 3 | 0 |
| Case 99 | 16 | 89,371,827 | 89,805,074 | 1 | 1 | 2 | 0 |
| Case 99 | 16 | 89,805,301 | 90,274,695 | 2 | 1 | 3 | 0 |
| Case 99 | 17 | 11,885     | 1,472,562  | 4 | 0 | 4 | 1 |
| Case 99 | 17 | 1,474,982  | 1,564,292  | 3 | 0 | 3 | 1 |
| Case 99 | 17 | 1,567,689  | 22,242,355 | 4 | 0 | 4 | 1 |
| Case 99 | 17 | 25,268,142 | 56,384,290 | 4 | 0 | 4 | 1 |
| Case 99 | 17 | 56,384,991 | 56,405,103 | 3 | 0 | 3 | 1 |
| Case 99 | 17 | 56,405,858 | 73,494,963 | 4 | 0 | 4 | 1 |
| Case 99 | 17 | 73,495,025 | 73,945,529 | 3 | 0 | 3 | 1 |
| Case 99 | 17 | 73,945,640 | 78,156,762 | 4 | 0 | 4 | 1 |
| Case 99 | 17 | 78,157,811 | 78,195,493 | 3 | 0 | 3 | 1 |
| Case 99 | 17 | 78,196,475 | 79,084,715 | 4 | 0 | 4 | 1 |
| Case 99 | 17 | 79,089,590 | 80,401,903 | 3 | 0 | 3 | 1 |
| Case 99 | 17 | 80,401,946 | 81,060,040 | 4 | 0 | 4 | 1 |
| Case 99 | 18 | 87,505     | 2,847,917  | 2 | 1 | 3 | 0 |
| Case 99 | 18 | 2,851,819  | 5,782,507  | 2 | 2 | 4 | 0 |
| Case 99 | 18 | 5,788,294  | 7,382,881  | 2 | 1 | 3 | 0 |
| Case 99 | 18 | 7,383,260  | 9,526,634  | 2 | 2 | 4 | 0 |
| Case 99 | 18 | 9,527,100  | 9,846,033  | 2 | 1 | 3 | 0 |
| Case 99 | 18 | 9,847,545  | 10,564,051 | 2 | 2 | 4 | 0 |
| Case 99 | 18 | 10,564,248 | 15,375,878 | 2 | 1 | 3 | 0 |
| Case 99 | 18 | 18,520,354 | 19,100,854 | 2 | 1 | 3 | 0 |



|         |    |            |            |   |   |   |   |
|---------|----|------------|------------|---|---|---|---|
| Case 99 | 18 | 19,107,091 | 20,904,406 | 3 | 1 | 4 | 0 |
| Case 99 | 18 | 20,915,791 | 21,037,808 | 4 | 1 | 5 | 0 |
| Case 99 | 18 | 21,041,225 | 21,513,768 | 5 | 1 | 6 | 0 |
| Case 99 | 18 | 21,513,810 | 22,588,929 | 4 | 1 | 5 | 0 |
| Case 99 | 18 | 22,595,550 | 23,328,744 | 5 | 1 | 6 | 0 |
| Case 99 | 18 | 23,330,422 | 23,372,314 | 6 | 1 | 7 | 0 |
| Case 99 | 18 | 23,389,136 | 23,504,011 | 3 | 1 | 4 | 0 |
| Case 99 | 18 | 23,504,200 | 23,531,600 | 2 | 1 | 3 | 0 |
| Case 99 | 18 | 23,537,365 | 28,842,738 | 1 | 1 | 2 | 0 |
| Case 99 | 18 | 28,849,215 | 29,283,145 | 2 | 1 | 3 | 0 |
| Case 99 | 18 | 29,286,801 | 29,750,658 | 1 | 1 | 2 | 0 |
| Case 99 | 18 | 29,754,749 | 29,951,538 | 2 | 1 | 3 | 0 |
| Case 99 | 18 | 29,953,667 | 34,917,023 | 1 | 1 | 2 | 0 |
| Case 99 | 18 | 34,917,959 | 36,163,993 | 2 | 1 | 3 | 0 |
| Case 99 | 18 | 36,164,249 | 42,081,925 | 1 | 1 | 2 | 0 |
| Case 99 | 18 | 42,086,902 | 43,329,310 | 2 | 1 | 3 | 0 |
| Case 99 | 18 | 43,329,719 | 43,923,851 | 1 | 1 | 2 | 0 |
| Case 99 | 18 | 43,940,065 | 46,515,916 | 2 | 1 | 3 | 0 |
| Case 99 | 18 | 46,516,210 | 47,010,017 | 1 | 1 | 2 | 0 |
| Case 99 | 18 | 47,010,098 | 48,685,468 | 2 | 1 | 3 | 0 |
| Case 99 | 18 | 48,686,563 | 53,977,917 | 1 | 1 | 2 | 0 |
| Case 99 | 18 | 53,986,552 | 55,149,354 | 2 | 1 | 3 | 0 |
| Case 99 | 18 | 55,150,557 | 55,723,315 | 1 | 1 | 2 | 0 |
| Case 99 | 18 | 55,726,152 | 56,297,110 | 2 | 1 | 3 | 0 |
| Case 99 | 18 | 56,297,220 | 56,852,972 | 1 | 1 | 2 | 0 |
| Case 99 | 18 | 56,855,621 | 57,128,753 | 2 | 1 | 3 | 0 |
| Case 99 | 18 | 57,128,858 | 58,038,332 | 1 | 1 | 2 | 0 |
| Case 99 | 18 | 58,038,777 | 58,051,263 | 2 | 1 | 3 | 0 |
| Case 99 | 18 | 58,051,294 | 61,170,694 | 1 | 1 | 2 | 0 |
| Case 99 | 18 | 61,170,721 | 61,394,140 | 2 | 1 | 3 | 0 |
| Case 99 | 18 | 61,398,078 | 71,480,827 | 1 | 1 | 2 | 0 |
| Case 99 | 18 | 71,482,490 | 73,533,574 | 2 | 1 | 3 | 0 |
| Case 99 | 18 | 73,534,004 | 74,672,735 | 1 | 1 | 2 | 0 |
| Case 99 | 18 | 74,680,224 | 74,884,667 | 2 | 1 | 3 | 0 |
| Case 99 | 18 | 74,885,488 | 75,004,937 | 1 | 1 | 2 | 0 |
| Case 99 | 18 | 75,006,885 | 75,118,412 | 2 | 1 | 3 | 0 |
| Case 99 | 18 | 75,124,722 | 76,260,205 | 1 | 1 | 2 | 0 |
| Case 99 | 18 | 76,267,149 | 76,704,368 | 2 | 1 | 3 | 0 |
| Case 99 | 18 | 76,705,614 | 77,134,275 | 1 | 1 | 2 | 0 |
| Case 99 | 18 | 77,138,035 | 77,661,170 | 2 | 1 | 3 | 0 |
| Case 99 | 18 | 77,664,150 | 78,015,180 | 1 | 1 | 2 | 0 |
| Case 99 | 19 | 260,912    | 418,769    | 3 | 1 | 4 | 0 |
| Case 99 | 19 | 418,948    | 1,271,462  | 2 | 1 | 3 | 0 |
| Case 99 | 19 | 1,272,040  | 2,141,209  | 3 | 0 | 3 | 1 |
| Case 99 | 19 | 2,160,529  | 2,830,344  | 2 | 1 | 3 | 0 |
| Case 99 | 19 | 2,832,338  | 3,035,766  | 3 | 1 | 4 | 0 |
| Case 99 | 19 | 3,037,787  | 3,728,609  | 2 | 1 | 3 | 0 |
| Case 99 | 19 | 3,728,642  | 5,790,284  | 2 | 2 | 4 | 0 |
| Case 99 | 19 | 5,791,071  | 6,734,014  | 3 | 1 | 4 | 0 |
| Case 99 | 19 | 6,734,038  | 6,988,914  | 2 | 2 | 4 | 0 |
| Case 99 | 19 | 6,989,025  | 7,506,936  | 3 | 1 | 4 | 0 |
| Case 99 | 19 | 7,507,444  | 7,735,140  | 2 | 1 | 3 | 0 |
| Case 99 | 19 | 7,741,726  | 7,868,715  | 3 | 1 | 4 | 0 |
| Case 99 | 19 | 7,871,837  | 8,996,460  | 2 | 1 | 3 | 0 |
| Case 99 | 19 | 8,996,695  | 9,297,196  | 3 | 1 | 4 | 0 |
| Case 99 | 19 | 9,297,286  | 10,091,365 | 2 | 1 | 3 | 0 |
| Case 99 | 19 | 10,091,529 | 10,405,284 | 3 | 1 | 4 | 0 |
| Case 99 | 19 | 10,408,318 | 11,358,799 | 2 | 1 | 3 | 0 |
| Case 99 | 19 | 11,359,484 | 11,598,224 | 2 | 2 | 4 | 0 |
| Case 99 | 19 | 11,598,232 | 12,788,452 | 2 | 1 | 3 | 0 |
| Case 99 | 19 | 12,790,506 | 13,008,674 | 2 | 2 | 4 | 0 |

|         |    |            |            |   |   |   |   |
|---------|----|------------|------------|---|---|---|---|
| Case 99 | 19 | 13,010,299 | 14,425,353 | 4 | 2 | 6 | 0 |
| Case 99 | 19 | 14,431,710 | 14,467,313 | 2 | 2 | 4 | 0 |
| Case 99 | 19 | 14,473,036 | 15,205,503 | 3 | 2 | 5 | 0 |
| Case 99 | 19 | 15,206,661 | 15,308,388 | 2 | 1 | 3 | 0 |
| Case 99 | 19 | 15,317,073 | 15,806,828 | 3 | 2 | 5 | 0 |
| Case 99 | 19 | 15,806,834 | 15,852,223 | 2 | 1 | 3 | 0 |
| Case 99 | 19 | 15,852,242 | 16,376,710 | 3 | 1 | 4 | 0 |
| Case 99 | 19 | 16,387,640 | 20,411,543 | 3 | 0 | 3 | 1 |
| Case 99 | 19 | 20,413,862 | 20,890,298 | 2 | 1 | 3 | 0 |
| Case 99 | 19 | 20,890,806 | 21,801,281 | 3 | 0 | 3 | 1 |
| Case 99 | 19 | 21,806,125 | 23,255,507 | 3 | 1 | 4 | 0 |
| Case 99 | 19 | 23,257,207 | 24,240,656 | 2 | 1 | 3 | 0 |
| Case 99 | 19 | 24,255,633 | 24,629,285 | 3 | 0 | 3 | 1 |
| Case 99 | 19 | 27,732,159 | 28,243,881 | 2 | 1 | 3 | 0 |
| Case 99 | 19 | 28,246,742 | 28,565,771 | 2 | 2 | 4 | 0 |
| Case 99 | 19 | 28,569,401 | 28,666,679 | 4 | 2 | 6 | 0 |
| Case 99 | 19 | 28,666,908 | 29,545,678 | 6 | 1 | 7 | 0 |
| Case 99 | 19 | 29,551,533 | 30,197,155 | 2 | 2 | 4 | 0 |
| Case 99 | 19 | 30,198,465 | 31,115,081 | 4 | 2 | 6 | 0 |
| Case 99 | 19 | 31,117,730 | 31,532,897 | 6 | 1 | 7 | 0 |
| Case 99 | 19 | 31,567,544 | 32,845,600 | 3 | 1 | 4 | 0 |
| Case 99 | 19 | 32,845,859 | 35,219,548 | 3 | 0 | 3 | 1 |
| Case 99 | 19 | 35,223,228 | 35,684,944 | 3 | 1 | 4 | 0 |
| Case 99 | 19 | 35,685,115 | 35,939,534 | 2 | 2 | 4 | 0 |
| Case 99 | 19 | 35,939,580 | 36,295,375 | 3 | 1 | 4 | 0 |
| Case 99 | 19 | 36,297,395 | 37,644,173 | 2 | 2 | 4 | 0 |
| Case 99 | 19 | 37,645,458 | 40,354,448 | 3 | 2 | 5 | 0 |
| Case 99 | 19 | 40,357,018 | 46,949,662 | 2 | 2 | 4 | 0 |
| Case 99 | 19 | 46,952,634 | 48,379,105 | 2 | 1 | 3 | 0 |
| Case 99 | 19 | 48,379,662 | 51,200,466 | 3 | 0 | 3 | 1 |
| Case 99 | 19 | 51,205,831 | 51,483,678 | 3 | 1 | 4 | 0 |
| Case 99 | 19 | 51,485,056 | 51,584,598 | 2 | 1 | 3 | 0 |
| Case 99 | 19 | 51,584,858 | 52,496,263 | 3 | 1 | 4 | 0 |
| Case 99 | 19 | 52,496,273 | 53,451,291 | 2 | 1 | 3 | 0 |
| Case 99 | 19 | 53,452,769 | 53,612,055 | 3 | 1 | 4 | 0 |
| Case 99 | 19 | 53,612,426 | 54,570,779 | 2 | 1 | 3 | 0 |
| Case 99 | 19 | 54,573,300 | 56,420,157 | 2 | 2 | 4 | 0 |
| Case 99 | 19 | 56,421,193 | 56,572,844 | 3 | 2 | 5 | 0 |
| Case 99 | 19 | 56,573,254 | 56,691,601 | 2 | 1 | 3 | 0 |
| Case 99 | 19 | 56,693,562 | 57,007,991 | 2 | 2 | 4 | 0 |
| Case 99 | 19 | 57,008,374 | 57,867,958 | 3 | 1 | 4 | 0 |
| Case 99 | 19 | 57,868,180 | 58,048,573 | 2 | 1 | 3 | 0 |
| Case 99 | 19 | 58,048,625 | 58,523,990 | 3 | 1 | 4 | 0 |
| Case 99 | 19 | 58,524,390 | 58,598,784 | 2 | 1 | 3 | 0 |
| Case 99 | 19 | 58,600,048 | 58,973,141 | 3 | 1 | 4 | 0 |
| Case 99 | 19 | 58,978,517 | 59,097,160 | 2 | 1 | 3 | 0 |
| Case 99 | 20 | 63,244     | 7,358,423  | 2 | 2 | 4 | 0 |
| Case 99 | 20 | 7,364,753  | 8,324,256  | 3 | 2 | 5 | 0 |
| Case 99 | 20 | 8,325,488  | 9,127,494  | 2 | 2 | 4 | 0 |
| Case 99 | 20 | 9,137,424  | 10,235,426 | 3 | 2 | 5 | 0 |
| Case 99 | 20 | 10,235,585 | 17,153,321 | 2 | 2 | 4 | 0 |
| Case 99 | 20 | 17,154,782 | 17,520,898 | 3 | 2 | 5 | 0 |
| Case 99 | 20 | 17,524,903 | 21,327,089 | 2 | 2 | 4 | 0 |
| Case 99 | 20 | 21,327,108 | 22,249,187 | 3 | 2 | 5 | 0 |
| Case 99 | 20 | 22,252,275 | 26,072,582 | 2 | 2 | 4 | 0 |
| Case 99 | 20 | 26,078,211 | 26,293,985 | 4 | 0 | 4 | 1 |
| Case 99 | 20 | 29,425,357 | 29,845,559 | 4 | 0 | 4 | 1 |
| Case 99 | 20 | 29,846,378 | 30,065,694 | 4 | 1 | 5 | 0 |
| Case 99 | 20 | 30,066,287 | 40,490,356 | 2 | 2 | 4 | 0 |
| Case 99 | 20 | 40,492,858 | 42,122,452 | 3 | 2 | 5 | 0 |
| Case 99 | 20 | 42,135,767 | 43,816,593 | 2 | 2 | 4 | 0 |

|          |    |            |            |   |   |   |   |
|----------|----|------------|------------|---|---|---|---|
| Case 99  | 20 | 43,829,584 | 43,897,362 | 3 | 2 | 5 | 0 |
| Case 99  | 20 | 43,897,590 | 51,649,730 | 2 | 2 | 4 | 0 |
| Case 99  | 20 | 51,649,948 | 51,879,861 | 3 | 2 | 5 | 0 |
| Case 99  | 20 | 51,881,039 | 52,771,261 | 2 | 2 | 4 | 0 |
| Case 99  | 20 | 52,772,741 | 53,253,686 | 3 | 2 | 5 | 0 |
| Case 99  | 20 | 53,254,815 | 53,532,627 | 2 | 2 | 4 | 0 |
| Case 99  | 20 | 53,541,227 | 54,366,440 | 3 | 2 | 5 | 0 |
| Case 99  | 20 | 54,371,967 | 58,524,529 | 2 | 2 | 4 | 0 |
| Case 99  | 20 | 58,528,449 | 59,122,693 | 3 | 2 | 5 | 0 |
| Case 99  | 20 | 59,125,742 | 61,527,378 | 2 | 2 | 4 | 0 |
| Case 99  | 20 | 61,527,563 | 62,187,126 | 4 | 0 | 4 | 1 |
| Case 99  | 20 | 62,187,204 | 62,187,743 | 3 | 0 | 3 | 1 |
| Case 99  | 20 | 62,187,744 | 62,391,014 | 2 | 2 | 4 | 0 |
| Case 99  | 20 | 62,399,641 | 62,948,788 | 3 | 2 | 5 | 0 |
| Case 99  | 21 | 10,827,533 | 10,971,337 | 3 | 1 | 4 | 0 |
| Case 99  | 21 | 14,368,320 | 18,652,994 | 3 | 1 | 4 | 0 |
| Case 99  | 21 | 18,674,800 | 19,278,614 | 2 | 2 | 4 | 0 |
| Case 99  | 21 | 19,283,870 | 21,324,649 | 3 | 1 | 4 | 0 |
| Case 99  | 21 | 21,336,088 | 21,812,046 | 2 | 1 | 3 | 0 |
| Case 99  | 21 | 21,812,287 | 23,059,127 | 3 | 1 | 4 | 0 |
| Case 99  | 21 | 23,059,409 | 25,209,156 | 2 | 1 | 3 | 0 |
| Case 99  | 21 | 25,211,216 | 25,517,741 | 2 | 2 | 4 | 0 |
| Case 99  | 21 | 25,518,478 | 26,520,594 | 2 | 1 | 3 | 0 |
| Case 99  | 21 | 26,520,748 | 27,163,338 | 3 | 1 | 4 | 0 |
| Case 99  | 21 | 27,168,049 | 27,643,476 | 2 | 1 | 3 | 0 |
| Case 99  | 21 | 27,644,590 | 35,757,915 | 3 | 1 | 4 | 0 |
| Case 99  | 21 | 35,773,931 | 38,000,778 | 2 | 1 | 3 | 0 |
| Case 99  | 21 | 38,002,291 | 38,081,500 | 1 | 1 | 2 | 0 |
| Case 99  | 21 | 38,082,812 | 41,160,099 | 2 | 1 | 3 | 0 |
| Case 99  | 21 | 41,160,938 | 41,431,874 | 2 | 2 | 4 | 0 |
| Case 99  | 21 | 41,434,841 | 43,543,193 | 2 | 1 | 3 | 0 |
| Case 99  | 21 | 43,543,261 | 43,640,169 | 2 | 2 | 4 | 0 |
| Case 99  | 21 | 43,640,183 | 44,324,329 | 2 | 1 | 3 | 0 |
| Case 99  | 21 | 44,324,365 | 44,496,941 | 1 | 1 | 2 | 0 |
| Case 99  | 21 | 44,503,243 | 44,833,854 | 2 | 1 | 3 | 0 |
| Case 99  | 21 | 44,835,301 | 45,108,038 | 1 | 1 | 2 | 0 |
| Case 99  | 21 | 45,108,044 | 45,811,343 | 2 | 1 | 3 | 0 |
| Case 99  | 21 | 45,811,411 | 45,877,078 | 1 | 1 | 2 | 0 |
| Case 99  | 21 | 45,877,121 | 46,876,004 | 2 | 1 | 3 | 0 |
| Case 99  | 21 | 46,876,044 | 47,636,418 | 1 | 1 | 2 | 0 |
| Case 99  | 21 | 47,639,392 | 47,783,504 | 2 | 1 | 3 | 0 |
| Case 99  | 21 | 47,783,806 | 47,891,525 | 1 | 1 | 2 | 0 |
| Case 99  | 21 | 47,892,806 | 48,100,155 | 2 | 1 | 3 | 0 |
| Case 99  | 22 | 16,114,244 | 47,483,147 | 3 | 0 | 3 | 1 |
| Case 99  | 22 | 47,489,470 | 50,684,515 | 4 | 0 | 4 | 1 |
| Case 99  | 22 | 50,684,747 | 50,964,236 | 3 | 0 | 3 | 1 |
| Case 99  | 22 | 50,965,683 | 51,195,728 | 4 | 0 | 4 | 1 |
| Case 100 | 1  | 82,154     | 1,153,858  | 2 | 1 | 3 | 0 |
| Case 100 | 1  | 1,154,157  | 1,196,471  | 3 | 0 | 3 | 1 |
| Case 100 | 1  | 1,197,591  | 1,269,741  | 4 | 0 | 4 | 1 |
| Case 100 | 1  | 1,269,986  | 1,485,984  | 5 | 0 | 5 | 1 |
| Case 100 | 1  | 1,489,670  | 2,379,248  | 4 | 1 | 5 | 0 |
| Case 100 | 1  | 2,381,568  | 3,035,227  | 2 | 1 | 3 | 0 |
| Case 100 | 1  | 3,037,613  | 3,394,533  | 3 | 1 | 4 | 0 |
| Case 100 | 1  | 3,394,541  | 5,951,013  | 2 | 1 | 3 | 0 |
| Case 100 | 1  | 5,951,029  | 6,172,266  | 3 | 1 | 4 | 0 |
| Case 100 | 1  | 6,175,489  | 6,378,607  | 2 | 1 | 3 | 0 |
| Case 100 | 1  | 6,379,607  | 6,534,226  | 3 | 0 | 3 | 1 |
| Case 100 | 1  | 6,534,600  | 11,007,982 | 2 | 1 | 3 | 0 |
| Case 100 | 1  | 11,007,997 | 11,008,695 | 1 | 1 | 2 | 0 |
| Case 100 | 1  | 11,008,700 | 14,099,574 | 2 | 1 | 3 | 0 |

|          |   |             |             |   |   |   |   |
|----------|---|-------------|-------------|---|---|---|---|
| Case 100 | 1 | 14,104,818  | 14,130,628  | 3 | 1 | 4 | 0 |
| Case 100 | 1 | 14,134,154  | 14,649,876  | 3 | 0 | 3 | 1 |
| Case 100 | 1 | 14,652,782  | 16,253,999  | 2 | 1 | 3 | 0 |
| Case 100 | 1 | 16,254,702  | 16,260,606  | 3 | 1 | 4 | 0 |
| Case 100 | 1 | 16,260,692  | 16,760,037  | 2 | 1 | 3 | 0 |
| Case 100 | 1 | 16,767,269  | 17,322,553  | 3 | 0 | 3 | 1 |
| Case 100 | 1 | 17,322,750  | 21,863,691  | 2 | 1 | 3 | 0 |
| Case 100 | 1 | 21,864,206  | 21,953,436  | 3 | 0 | 3 | 1 |
| Case 100 | 1 | 21,954,294  | 34,270,187  | 2 | 1 | 3 | 0 |
| Case 100 | 1 | 34,270,498  | 35,476,384  | 3 | 1 | 4 | 0 |
| Case 100 | 1 | 35,476,544  | 39,258,674  | 2 | 1 | 3 | 0 |
| Case 100 | 1 | 39,266,840  | 41,582,667  | 3 | 1 | 4 | 0 |
| Case 100 | 1 | 41,608,595  | 41,618,297  | 2 | 1 | 3 | 0 |
| Case 100 | 1 | 41,634,956  | 42,253,788  | 4 | 1 | 5 | 0 |
| Case 100 | 1 | 42,254,540  | 45,063,606  | 6 | 1 | 7 | 0 |
| Case 100 | 1 | 45,067,435  | 45,110,400  | 3 | 2 | 5 | 0 |
| Case 100 | 1 | 45,110,683  | 45,766,451  | 4 | 1 | 5 | 0 |
| Case 100 | 1 | 45,788,479  | 46,159,201  | 3 | 1 | 4 | 0 |
| Case 100 | 1 | 46,159,395  | 49,127,186  | 2 | 1 | 3 | 0 |
| Case 100 | 1 | 49,128,902  | 49,189,775  | 3 | 1 | 4 | 0 |
| Case 100 | 1 | 49,193,129  | 49,352,177  | 5 | 1 | 6 | 0 |
| Case 100 | 1 | 49,361,990  | 62,614,453  | 2 | 1 | 3 | 0 |
| Case 100 | 1 | 62,615,684  | 62,739,433  | 3 | 0 | 3 | 1 |
| Case 100 | 1 | 62,739,542  | 66,790,248  | 2 | 1 | 3 | 0 |
| Case 100 | 1 | 66,796,248  | 66,986,653  | 3 | 0 | 3 | 1 |
| Case 100 | 1 | 66,986,715  | 68,634,144  | 2 | 1 | 3 | 0 |
| Case 100 | 1 | 68,634,196  | 69,083,551  | 3 | 0 | 3 | 1 |
| Case 100 | 1 | 69,087,317  | 70,343,674  | 4 | 0 | 4 | 1 |
| Case 100 | 1 | 70,355,981  | 81,897,255  | 3 | 0 | 3 | 1 |
| Case 100 | 1 | 81,897,388  | 82,237,323  | 2 | 1 | 3 | 0 |
| Case 100 | 1 | 82,242,203  | 104,779,012 | 3 | 0 | 3 | 1 |
| Case 100 | 1 | 104,789,235 | 107,232,816 | 2 | 0 | 2 | 1 |
| Case 100 | 1 | 107,235,329 | 107,848,612 | 3 | 0 | 3 | 1 |
| Case 100 | 1 | 107,849,040 | 110,130,405 | 2 | 1 | 3 | 0 |
| Case 100 | 1 | 110,132,098 | 110,863,079 | 3 | 1 | 4 | 0 |
| Case 100 | 1 | 110,871,061 | 111,036,717 | 2 | 1 | 3 | 0 |
| Case 100 | 1 | 111,038,840 | 112,048,264 | 3 | 1 | 4 | 0 |
| Case 100 | 1 | 112,052,105 | 112,433,863 | 2 | 1 | 3 | 0 |
| Case 100 | 1 | 112,434,196 | 112,659,363 | 3 | 1 | 4 | 0 |
| Case 100 | 1 | 112,667,758 | 116,605,423 | 2 | 1 | 3 | 0 |
| Case 100 | 1 | 116,607,788 | 117,025,609 | 3 | 1 | 4 | 0 |
| Case 100 | 1 | 117,026,156 | 117,753,528 | 2 | 1 | 3 | 0 |
| Case 100 | 1 | 117,756,019 | 120,861,593 | 3 | 1 | 4 | 0 |
| Case 100 | 1 | 120,918,861 | 121,346,616 | 3 | 0 | 3 | 1 |
| Case 100 | 1 | 142,649,718 | 143,418,972 | 3 | 0 | 3 | 1 |
| Case 100 | 1 | 143,720,409 | 147,246,793 | 2 | 2 | 4 | 0 |
| Case 100 | 1 | 147,248,817 | 147,726,495 | 3 | 2 | 5 | 0 |
| Case 100 | 1 | 147,729,232 | 152,151,950 | 2 | 2 | 4 | 0 |
| Case 100 | 1 | 152,152,329 | 152,275,740 | 3 | 2 | 5 | 0 |
| Case 100 | 1 | 152,275,790 | 152,286,468 | 2 | 2 | 4 | 0 |
| Case 100 | 1 | 152,286,487 | 153,177,373 | 3 | 2 | 5 | 0 |
| Case 100 | 1 | 153,177,852 | 153,584,242 | 2 | 2 | 4 | 0 |
| Case 100 | 1 | 153,585,974 | 154,295,594 | 4 | 2 | 6 | 0 |
| Case 100 | 1 | 154,296,076 | 154,303,963 | 3 | 0 | 3 | 1 |
| Case 100 | 1 | 154,303,976 | 154,382,049 | 4 | 0 | 4 | 1 |
| Case 100 | 1 | 154,400,015 | 154,430,092 | 5 | 0 | 5 | 1 |
| Case 100 | 1 | 154,432,420 | 155,735,887 | 2 | 2 | 4 | 0 |
| Case 100 | 1 | 155,735,960 | 156,526,444 | 2 | 1 | 3 | 0 |
| Case 100 | 1 | 156,526,467 | 156,810,789 | 3 | 1 | 4 | 0 |
| Case 100 | 1 | 156,811,202 | 156,884,365 | 2 | 1 | 3 | 0 |
| Case 100 | 1 | 156,890,672 | 157,116,035 | 3 | 1 | 4 | 0 |

|          |   |             |             |   |   |   |   |
|----------|---|-------------|-------------|---|---|---|---|
| Case 100 | 1 | 157,118,421 | 157,556,532 | 2 | 1 | 3 | 0 |
| Case 100 | 1 | 157,557,111 | 157,634,415 | 3 | 0 | 3 | 1 |
| Case 100 | 1 | 157,637,964 | 157,670,816 | 3 | 1 | 4 | 0 |
| Case 100 | 1 | 157,672,304 | 158,061,626 | 2 | 1 | 3 | 0 |
| Case 100 | 1 | 158,063,551 | 158,436,280 | 3 | 1 | 4 | 0 |
| Case 100 | 1 | 158,446,532 | 161,161,016 | 3 | 0 | 3 | 1 |
| Case 100 | 1 | 161,161,058 | 161,172,233 | 2 | 0 | 2 | 1 |
| Case 100 | 1 | 161,172,525 | 169,762,613 | 3 | 0 | 3 | 1 |
| Case 100 | 1 | 169,762,661 | 169,816,943 | 2 | 0 | 2 | 1 |
| Case 100 | 1 | 169,818,763 | 171,405,186 | 3 | 0 | 3 | 1 |
| Case 100 | 1 | 171,409,515 | 171,592,553 | 2 | 0 | 2 | 1 |
| Case 100 | 1 | 171,592,869 | 173,678,039 | 3 | 0 | 3 | 1 |
| Case 100 | 1 | 173,680,991 | 174,934,586 | 2 | 0 | 2 | 1 |
| Case 100 | 1 | 174,937,352 | 178,633,373 | 3 | 0 | 3 | 1 |
| Case 100 | 1 | 178,641,945 | 179,437,777 | 2 | 0 | 2 | 1 |
| Case 100 | 1 | 179,452,275 | 180,893,135 | 3 | 0 | 3 | 1 |
| Case 100 | 1 | 180,894,304 | 180,914,534 | 2 | 0 | 2 | 1 |
| Case 100 | 1 | 180,915,596 | 185,013,349 | 3 | 0 | 3 | 1 |
| Case 100 | 1 | 185,014,002 | 185,500,084 | 2 | 0 | 2 | 1 |
| Case 100 | 1 | 185,510,752 | 186,345,497 | 3 | 0 | 3 | 1 |
| Case 100 | 1 | 186,351,104 | 186,685,818 | 2 | 0 | 2 | 1 |
| Case 100 | 1 | 186,687,347 | 187,557,096 | 3 | 0 | 3 | 1 |
| Case 100 | 1 | 187,565,339 | 189,002,771 | 2 | 0 | 2 | 1 |
| Case 100 | 1 | 189,012,899 | 191,109,973 | 3 | 0 | 3 | 1 |
| Case 100 | 1 | 191,145,367 | 192,366,691 | 2 | 0 | 2 | 1 |
| Case 100 | 1 | 192,370,110 | 194,299,382 | 3 | 0 | 3 | 1 |
| Case 100 | 1 | 194,301,026 | 195,350,153 | 2 | 0 | 2 | 1 |
| Case 100 | 1 | 195,363,004 | 201,042,268 | 3 | 0 | 3 | 1 |
| Case 100 | 1 | 201,042,735 | 201,888,672 | 4 | 0 | 4 | 1 |
| Case 100 | 1 | 201,888,969 | 202,398,019 | 3 | 0 | 3 | 1 |
| Case 100 | 1 | 202,402,782 | 203,743,128 | 4 | 0 | 4 | 1 |
| Case 100 | 1 | 203,743,145 | 204,274,256 | 3 | 0 | 3 | 1 |
| Case 100 | 1 | 204,281,004 | 205,055,162 | 4 | 0 | 4 | 1 |
| Case 100 | 1 | 205,063,949 | 205,813,329 | 3 | 0 | 3 | 1 |
| Case 100 | 1 | 205,813,330 | 206,223,319 | 4 | 0 | 4 | 1 |
| Case 100 | 1 | 206,223,556 | 206,772,753 | 3 | 0 | 3 | 1 |
| Case 100 | 1 | 206,773,157 | 209,771,347 | 4 | 0 | 4 | 1 |
| Case 100 | 1 | 209,773,416 | 211,486,997 | 3 | 0 | 3 | 1 |
| Case 100 | 1 | 211,488,538 | 211,570,581 | 2 | 0 | 2 | 1 |
| Case 100 | 1 | 211,588,944 | 213,178,551 | 3 | 0 | 3 | 1 |
| Case 100 | 1 | 213,178,764 | 214,622,818 | 4 | 0 | 4 | 1 |
| Case 100 | 1 | 214,625,224 | 218,492,121 | 3 | 0 | 3 | 1 |
| Case 100 | 1 | 218,500,591 | 219,570,103 | 4 | 0 | 4 | 1 |
| Case 100 | 1 | 219,577,106 | 220,869,999 | 3 | 0 | 3 | 1 |
| Case 100 | 1 | 220,870,033 | 222,553,902 | 4 | 0 | 4 | 1 |
| Case 100 | 1 | 222,560,139 | 228,584,659 | 3 | 0 | 3 | 1 |
| Case 100 | 1 | 228,585,562 | 229,157,752 | 4 | 0 | 4 | 1 |
| Case 100 | 1 | 229,159,643 | 229,772,630 | 3 | 0 | 3 | 1 |
| Case 100 | 1 | 229,772,693 | 230,953,983 | 4 | 0 | 4 | 1 |
| Case 100 | 1 | 230,954,785 | 231,903,010 | 3 | 0 | 3 | 1 |
| Case 100 | 1 | 231,906,589 | 232,896,663 | 4 | 0 | 4 | 1 |
| Case 100 | 1 | 232,901,272 | 249,145,628 | 3 | 0 | 3 | 1 |
| Case 100 | 1 | 249,146,286 | 249,218,992 | 4 | 0 | 4 | 1 |
| Case 100 | 2 | 18,674      | 43,315,848  | 3 | 0 | 3 | 1 |
| Case 100 | 2 | 43,317,253  | 47,238,519  | 3 | 2 | 5 | 0 |
| Case 100 | 2 | 47,238,530  | 49,096,835  | 2 | 2 | 4 | 0 |
| Case 100 | 2 | 49,099,508  | 49,492,187  | 3 | 2 | 5 | 0 |
| Case 100 | 2 | 49,493,299  | 73,869,666  | 3 | 0 | 3 | 1 |
| Case 100 | 2 | 73,878,352  | 73,928,422  | 6 | 0 | 6 | 1 |
| Case 100 | 2 | 73,932,044  | 85,658,232  | 3 | 0 | 3 | 1 |
| Case 100 | 2 | 85,662,244  | 85,673,991  | 2 | 0 | 2 | 1 |

|          |   |             |             |   |   |   |   |
|----------|---|-------------|-------------|---|---|---|---|
| Case 100 | 2 | 85,674,576  | 92,081,640  | 3 | 0 | 3 | 1 |
| Case 100 | 2 | 95,429,424  | 95,954,266  | 3 | 0 | 3 | 1 |
| Case 100 | 2 | 95,954,294  | 98,709,679  | 4 | 0 | 4 | 1 |
| Case 100 | 2 | 98,710,243  | 131,487,112 | 5 | 0 | 5 | 1 |
| Case 100 | 2 | 131,487,166 | 138,509,193 | 4 | 0 | 4 | 1 |
| Case 100 | 2 | 138,522,393 | 138,729,113 | 5 | 0 | 5 | 1 |
| Case 100 | 2 | 138,729,234 | 150,055,735 | 2 | 2 | 4 | 0 |
| Case 100 | 2 | 150,058,128 | 151,677,478 | 3 | 2 | 5 | 0 |
| Case 100 | 2 | 151,681,039 | 154,417,270 | 2 | 2 | 4 | 0 |
| Case 100 | 2 | 154,418,706 | 158,176,774 | 3 | 2 | 5 | 0 |
| Case 100 | 2 | 158,177,489 | 159,536,990 | 2 | 2 | 4 | 0 |
| Case 100 | 2 | 159,537,101 | 170,675,765 | 3 | 2 | 5 | 0 |
| Case 100 | 2 | 170,676,105 | 179,416,834 | 2 | 2 | 4 | 0 |
| Case 100 | 2 | 179,416,879 | 179,642,620 | 3 | 2 | 5 | 0 |
| Case 100 | 2 | 179,642,665 | 181,522,907 | 2 | 2 | 4 | 0 |
| Case 100 | 2 | 181,542,055 | 183,347,174 | 3 | 2 | 5 | 0 |
| Case 100 | 2 | 183,350,379 | 184,786,881 | 2 | 2 | 4 | 0 |
| Case 100 | 2 | 184,797,826 | 187,213,730 | 3 | 2 | 5 | 0 |
| Case 100 | 2 | 187,240,797 | 190,920,386 | 2 | 2 | 4 | 0 |
| Case 100 | 2 | 190,921,491 | 196,277,506 | 3 | 2 | 5 | 0 |
| Case 100 | 2 | 196,288,136 | 198,875,464 | 2 | 2 | 4 | 0 |
| Case 100 | 2 | 198,881,668 | 201,604,436 | 3 | 2 | 5 | 0 |
| Case 100 | 2 | 201,606,722 | 207,705,755 | 2 | 2 | 4 | 0 |
| Case 100 | 2 | 207,707,077 | 208,335,510 | 3 | 2 | 5 | 0 |
| Case 100 | 2 | 208,336,308 | 209,222,578 | 2 | 2 | 4 | 0 |
| Case 100 | 2 | 209,233,517 | 209,572,263 | 3 | 2 | 5 | 0 |
| Case 100 | 2 | 209,574,249 | 211,354,027 | 2 | 2 | 4 | 0 |
| Case 100 | 2 | 211,355,495 | 215,650,580 | 3 | 2 | 5 | 0 |
| Case 100 | 2 | 215,657,032 | 217,885,659 | 2 | 2 | 4 | 0 |
| Case 100 | 2 | 217,894,024 | 219,269,098 | 3 | 2 | 5 | 0 |
| Case 100 | 2 | 219,269,135 | 219,515,109 | 2 | 2 | 4 | 0 |
| Case 100 | 2 | 219,520,895 | 220,360,683 | 3 | 2 | 5 | 0 |
| Case 100 | 2 | 220,363,488 | 220,470,710 | 3 | 1 | 4 | 0 |
| Case 100 | 2 | 220,471,441 | 224,145,451 | 3 | 2 | 5 | 0 |
| Case 100 | 2 | 224,146,067 | 224,836,562 | 2 | 2 | 4 | 0 |
| Case 100 | 2 | 224,837,600 | 225,177,666 | 3 | 2 | 5 | 0 |
| Case 100 | 2 | 225,178,583 | 226,034,642 | 2 | 2 | 4 | 0 |
| Case 100 | 2 | 226,035,360 | 227,205,102 | 3 | 2 | 5 | 0 |
| Case 100 | 2 | 227,207,379 | 232,789,015 | 2 | 2 | 4 | 0 |
| Case 100 | 2 | 232,790,908 | 233,272,091 | 3 | 2 | 5 | 0 |
| Case 100 | 2 | 233,272,305 | 234,189,406 | 2 | 2 | 4 | 0 |
| Case 100 | 2 | 234,190,740 | 235,194,246 | 3 | 2 | 5 | 0 |
| Case 100 | 2 | 235,195,230 | 239,184,581 | 2 | 2 | 4 | 0 |
| Case 100 | 2 | 239,185,804 | 240,732,508 | 3 | 2 | 5 | 0 |
| Case 100 | 2 | 240,732,594 | 242,665,008 | 2 | 2 | 4 | 0 |
| Case 100 | 2 | 242,667,894 | 243,048,760 | 2 | 1 | 3 | 0 |
| Case 100 | 3 | 61,495      | 6,406,809   | 3 | 0 | 3 | 1 |
| Case 100 | 3 | 6,409,144   | 9,969,994   | 2 | 1 | 3 | 0 |
| Case 100 | 3 | 9,970,030   | 10,124,120  | 3 | 0 | 3 | 1 |
| Case 100 | 3 | 10,126,312  | 12,224,151  | 2 | 1 | 3 | 0 |
| Case 100 | 3 | 12,226,031  | 12,470,043  | 3 | 0 | 3 | 1 |
| Case 100 | 3 | 12,470,314  | 22,081,979  | 2 | 1 | 3 | 0 |
| Case 100 | 3 | 22,083,147  | 38,721,160  | 3 | 0 | 3 | 1 |
| Case 100 | 3 | 38,721,308  | 38,893,532  | 4 | 0 | 4 | 1 |
| Case 100 | 3 | 38,895,359  | 46,295,777  | 3 | 0 | 3 | 1 |
| Case 100 | 3 | 46,299,765  | 46,449,864  | 4 | 0 | 4 | 1 |
| Case 100 | 3 | 46,449,890  | 59,905,961  | 3 | 0 | 3 | 1 |
| Case 100 | 3 | 59,906,598  | 59,981,525  | 4 | 0 | 4 | 1 |
| Case 100 | 3 | 59,981,976  | 60,240,638  | 3 | 0 | 3 | 1 |
| Case 100 | 3 | 60,241,445  | 60,254,987  | 2 | 0 | 2 | 1 |
| Case 100 | 3 | 60,256,485  | 60,330,390  | 1 | 0 | 1 | 0 |

|          |   |             |             |   |   |   |   |
|----------|---|-------------|-------------|---|---|---|---|
| Case 100 | 3 | 60,332,301  | 61,081,768  | 3 | 0 | 3 | 1 |
| Case 100 | 3 | 61,082,153  | 67,458,381  | 2 | 1 | 3 | 0 |
| Case 100 | 3 | 67,458,562  | 90,442,925  | 3 | 0 | 3 | 1 |
| Case 100 | 3 | 93,537,290  | 94,840,458  | 3 | 0 | 3 | 1 |
| Case 100 | 3 | 94,840,605  | 97,868,931  | 4 | 0 | 4 | 1 |
| Case 100 | 3 | 97,869,026  | 98,001,874  | 3 | 0 | 3 | 1 |
| Case 100 | 3 | 98,002,188  | 101,231,921 | 3 | 1 | 4 | 0 |
| Case 100 | 3 | 101,232,736 | 101,807,592 | 2 | 1 | 3 | 0 |
| Case 100 | 3 | 101,808,006 | 118,062,786 | 3 | 1 | 4 | 0 |
| Case 100 | 3 | 118,081,025 | 118,095,784 | 3 | 0 | 3 | 1 |
| Case 100 | 3 | 118,098,264 | 134,322,742 | 4 | 0 | 4 | 1 |
| Case 100 | 3 | 134,322,756 | 136,664,745 | 3 | 1 | 4 | 0 |
| Case 100 | 3 | 136,664,749 | 139,489,458 | 2 | 1 | 3 | 0 |
| Case 100 | 3 | 139,496,471 | 139,682,495 | 3 | 0 | 3 | 1 |
| Case 100 | 3 | 139,684,873 | 155,139,253 | 2 | 1 | 3 | 0 |
| Case 100 | 3 | 155,142,297 | 155,355,295 | 3 | 0 | 3 | 1 |
| Case 100 | 3 | 155,357,370 | 161,097,268 | 2 | 1 | 3 | 0 |
| Case 100 | 3 | 161,098,330 | 161,460,016 | 3 | 0 | 3 | 1 |
| Case 100 | 3 | 161,474,909 | 165,311,604 | 2 | 1 | 3 | 0 |
| Case 100 | 3 | 165,314,375 | 165,547,973 | 3 | 0 | 3 | 1 |
| Case 100 | 3 | 165,548,010 | 184,508,101 | 2 | 1 | 3 | 0 |
| Case 100 | 3 | 184,514,613 | 188,476,787 | 3 | 0 | 3 | 1 |
| Case 100 | 3 | 188,477,590 | 191,257,864 | 2 | 1 | 3 | 0 |
| Case 100 | 3 | 191,258,074 | 191,348,064 | 3 | 0 | 3 | 1 |
| Case 100 | 3 | 191,348,677 | 197,838,262 | 2 | 1 | 3 | 0 |
| Case 100 | 4 | 71,566      | 520,973     | 3 | 0 | 3 | 1 |
| Case 100 | 4 | 521,480     | 756,986     | 4 | 0 | 4 | 1 |
| Case 100 | 4 | 759,374     | 949,214     | 3 | 0 | 3 | 1 |
| Case 100 | 4 | 949,223     | 1,017,749   | 2 | 1 | 3 | 0 |
| Case 100 | 4 | 1,017,759   | 1,554,748   | 3 | 1 | 4 | 0 |
| Case 100 | 4 | 1,563,920   | 2,939,018   | 2 | 1 | 3 | 0 |
| Case 100 | 4 | 2,940,916   | 3,344,760   | 3 | 1 | 4 | 0 |
| Case 100 | 4 | 3,346,617   | 3,516,501   | 2 | 1 | 3 | 0 |
| Case 100 | 4 | 3,519,881   | 3,709,475   | 3 | 1 | 4 | 0 |
| Case 100 | 4 | 3,710,982   | 4,990,563   | 2 | 1 | 3 | 0 |
| Case 100 | 4 | 4,991,380   | 5,161,027   | 3 | 1 | 4 | 0 |
| Case 100 | 4 | 5,162,389   | 5,527,185   | 2 | 1 | 3 | 0 |
| Case 100 | 4 | 5,527,214   | 5,664,970   | 3 | 1 | 4 | 0 |
| Case 100 | 4 | 5,665,201   | 5,844,865   | 2 | 1 | 3 | 0 |
| Case 100 | 4 | 5,847,493   | 6,342,213   | 3 | 1 | 4 | 0 |
| Case 100 | 4 | 6,342,359   | 6,857,278   | 2 | 1 | 3 | 0 |
| Case 100 | 4 | 6,862,131   | 7,043,795   | 3 | 1 | 4 | 0 |
| Case 100 | 4 | 7,043,830   | 7,174,993   | 2 | 1 | 3 | 0 |
| Case 100 | 4 | 7,178,278   | 7,984,736   | 3 | 1 | 4 | 0 |
| Case 100 | 4 | 7,985,047   | 8,367,799   | 2 | 1 | 3 | 0 |
| Case 100 | 4 | 8,368,433   | 8,621,123   | 3 | 1 | 4 | 0 |
| Case 100 | 4 | 8,621,172   | 13,302,267  | 2 | 1 | 3 | 0 |
| Case 100 | 4 | 13,303,269  | 15,482,322  | 3 | 1 | 4 | 0 |
| Case 100 | 4 | 15,482,360  | 23,173,926  | 2 | 1 | 3 | 0 |
| Case 100 | 4 | 23,175,107  | 24,134,431  | 3 | 1 | 4 | 0 |
| Case 100 | 4 | 24,134,520  | 24,882,927  | 2 | 1 | 3 | 0 |
| Case 100 | 4 | 24,885,284  | 25,009,491  | 3 | 1 | 4 | 0 |
| Case 100 | 4 | 25,011,001  | 40,447,356  | 2 | 1 | 3 | 0 |
| Case 100 | 4 | 40,451,394  | 40,546,244  | 3 | 0 | 3 | 1 |
| Case 100 | 4 | 40,548,057  | 49,067,067  | 2 | 1 | 3 | 0 |
| Case 100 | 4 | 49,091,782  | 49,620,898  | 1 | 1 | 2 | 0 |
| Case 100 | 4 | 52,697,856  | 55,426,618  | 1 | 1 | 2 | 0 |
| Case 100 | 4 | 55,426,911  | 55,976,857  | 2 | 1 | 3 | 0 |
| Case 100 | 4 | 55,978,210  | 73,149,047  | 1 | 1 | 2 | 0 |
| Case 100 | 4 | 73,149,106  | 79,710,989  | 2 | 1 | 3 | 0 |
| Case 100 | 4 | 79,720,870  | 80,217,741  | 1 | 1 | 2 | 0 |

|          |   |             |             |   |   |   |   |
|----------|---|-------------|-------------|---|---|---|---|
| Case 100 | 4 | 80,226,156  | 80,339,467  | 2 | 1 | 3 | 0 |
| Case 100 | 4 | 80,348,284  | 81,181,388  | 1 | 1 | 2 | 0 |
| Case 100 | 4 | 81,183,900  | 88,411,950  | 2 | 0 | 2 | 1 |
| Case 100 | 4 | 88,412,806  | 88,799,710  | 3 | 0 | 3 | 1 |
| Case 100 | 4 | 88,801,906  | 90,100,155  | 2 | 0 | 2 | 1 |
| Case 100 | 4 | 90,102,682  | 90,374,397  | 3 | 0 | 3 | 1 |
| Case 100 | 4 | 90,375,951  | 96,733,861  | 2 | 0 | 2 | 1 |
| Case 100 | 4 | 96,734,419  | 96,893,798  | 3 | 0 | 3 | 1 |
| Case 100 | 4 | 96,897,523  | 99,337,994  | 2 | 0 | 2 | 1 |
| Case 100 | 4 | 99,338,519  | 99,636,215  | 3 | 0 | 3 | 1 |
| Case 100 | 4 | 99,636,952  | 100,336,769 | 2 | 0 | 2 | 1 |
| Case 100 | 4 | 100,336,773 | 114,267,117 | 1 | 1 | 2 | 0 |
| Case 100 | 4 | 114,267,122 | 114,311,645 | 2 | 1 | 3 | 0 |
| Case 100 | 4 | 114,312,389 | 123,536,862 | 1 | 1 | 2 | 0 |
| Case 100 | 4 | 123,536,963 | 123,799,987 | 2 | 1 | 3 | 0 |
| Case 100 | 4 | 123,800,617 | 126,320,038 | 1 | 1 | 2 | 0 |
| Case 100 | 4 | 126,321,993 | 126,412,558 | 2 | 1 | 3 | 0 |
| Case 100 | 4 | 126,412,575 | 130,161,321 | 1 | 1 | 2 | 0 |
| Case 100 | 4 | 130,161,349 | 130,412,508 | 2 | 1 | 3 | 0 |
| Case 100 | 4 | 130,417,557 | 152,498,875 | 1 | 1 | 2 | 0 |
| Case 100 | 4 | 152,499,143 | 152,945,315 | 2 | 1 | 3 | 0 |
| Case 100 | 4 | 152,947,155 | 155,129,517 | 1 | 1 | 2 | 0 |
| Case 100 | 4 | 155,132,707 | 155,225,826 | 2 | 1 | 3 | 0 |
| Case 100 | 4 | 155,225,839 | 167,907,991 | 1 | 1 | 2 | 0 |
| Case 100 | 4 | 167,908,627 | 168,216,832 | 2 | 0 | 2 | 1 |
| Case 100 | 4 | 168,236,901 | 187,445,552 | 1 | 1 | 2 | 0 |
| Case 100 | 4 | 187,449,434 | 187,527,319 | 2 | 1 | 3 | 0 |
| Case 100 | 4 | 187,527,321 | 187,538,942 | 1 | 1 | 2 | 0 |
| Case 100 | 4 | 187,539,125 | 187,549,905 | 2 | 1 | 3 | 0 |
| Case 100 | 4 | 187,550,697 | 189,672,283 | 1 | 1 | 2 | 0 |
| Case 100 | 4 | 189,673,054 | 189,881,357 | 2 | 0 | 2 | 1 |
| Case 100 | 4 | 189,882,597 | 190,688,592 | 1 | 1 | 2 | 0 |
| Case 100 | 4 | 190,690,358 | 190,742,692 | 2 | 1 | 3 | 0 |
| Case 100 | 4 | 190,745,892 | 190,963,766 | 3 | 0 | 3 | 1 |
| Case 100 | 5 | 38,139      | 3,109,410   | 6 | 0 | 6 | 1 |
| Case 100 | 5 | 3,110,197   | 7,065,257   | 3 | 0 | 3 | 1 |
| Case 100 | 5 | 7,071,229   | 7,178,644   | 2 | 0 | 2 | 1 |
| Case 100 | 5 | 7,179,551   | 11,329,757  | 3 | 0 | 3 | 1 |
| Case 100 | 5 | 11,333,739  | 13,221,613  | 2 | 0 | 2 | 1 |
| Case 100 | 5 | 13,235,570  | 13,809,221  | 3 | 0 | 3 | 1 |
| Case 100 | 5 | 13,811,775  | 13,850,750  | 2 | 0 | 2 | 1 |
| Case 100 | 5 | 13,850,914  | 13,991,502  | 3 | 0 | 3 | 1 |
| Case 100 | 5 | 13,993,530  | 20,358,169  | 2 | 0 | 2 | 1 |
| Case 100 | 5 | 20,364,007  | 46,228,333  | 6 | 0 | 6 | 1 |
| Case 100 | 5 | 46,251,306  | 46,399,093  | 3 | 0 | 3 | 1 |
| Case 100 | 5 | 49,457,282  | 56,742,262  | 3 | 0 | 3 | 1 |
| Case 100 | 5 | 56,749,587  | 58,618,889  | 5 | 0 | 5 | 1 |
| Case 100 | 5 | 58,620,440  | 64,762,465  | 3 | 0 | 3 | 1 |
| Case 100 | 5 | 64,763,225  | 65,121,368  | 2 | 0 | 2 | 1 |
| Case 100 | 5 | 65,122,967  | 139,931,384 | 3 | 0 | 3 | 1 |
| Case 100 | 5 | 139,931,607 | 139,938,303 | 1 | 0 | 1 | 0 |
| Case 100 | 5 | 139,938,337 | 180,693,127 | 3 | 0 | 3 | 1 |
| Case 100 | 6 | 108,666     | 474,252     | 4 | 0 | 4 | 1 |
| Case 100 | 6 | 475,154     | 3,340,717   | 3 | 0 | 3 | 1 |
| Case 100 | 6 | 3,341,675   | 3,527,310   | 4 | 0 | 4 | 1 |
| Case 100 | 6 | 3,531,912   | 6,167,822   | 3 | 0 | 3 | 1 |
| Case 100 | 6 | 6,167,833   | 6,224,961   | 4 | 0 | 4 | 1 |
| Case 100 | 6 | 6,225,027   | 29,356,687  | 3 | 0 | 3 | 1 |
| Case 100 | 6 | 29,356,734  | 29,455,357  | 4 | 0 | 4 | 1 |
| Case 100 | 6 | 29,455,505  | 31,265,146  | 3 | 0 | 3 | 1 |
| Case 100 | 6 | 31,265,262  | 31,390,410  | 4 | 0 | 4 | 1 |



|          |   |             |             |   |   |   |   |
|----------|---|-------------|-------------|---|---|---|---|
| Case 100 | 6 | 31,391,401  | 31,526,856  | 3 | 0 | 3 | 1 |
| Case 100 | 6 | 31,527,266  | 32,282,216  | 2 | 1 | 3 | 0 |
| Case 100 | 6 | 32,282,854  | 32,290,208  | 4 | 1 | 5 | 0 |
| Case 100 | 6 | 32,290,927  | 32,921,774  | 2 | 1 | 3 | 0 |
| Case 100 | 6 | 32,922,459  | 33,113,197  | 3 | 0 | 3 | 1 |
| Case 100 | 6 | 33,114,171  | 37,514,103  | 2 | 1 | 3 | 0 |
| Case 100 | 6 | 37,514,461  | 40,218,128  | 3 | 0 | 3 | 1 |
| Case 100 | 6 | 40,224,268  | 40,999,802  | 4 | 0 | 4 | 1 |
| Case 100 | 6 | 41,000,638  | 41,197,301  | 3 | 0 | 3 | 1 |
| Case 100 | 6 | 41,197,857  | 41,455,297  | 4 | 0 | 4 | 1 |
| Case 100 | 6 | 41,458,286  | 58,752,089  | 3 | 0 | 3 | 1 |
| Case 100 | 6 | 61,891,118  | 78,294,880  | 3 | 0 | 3 | 1 |
| Case 100 | 6 | 78,297,902  | 101,392,348 | 2 | 2 | 4 | 0 |
| Case 100 | 6 | 101,395,407 | 110,239,704 | 2 | 1 | 3 | 0 |
| Case 100 | 6 | 110,241,059 | 151,914,385 | 2 | 2 | 4 | 0 |
| Case 100 | 6 | 151,914,951 | 157,265,752 | 4 | 2 | 6 | 0 |
| Case 100 | 6 | 157,266,505 | 158,504,365 | 3 | 0 | 3 | 1 |
| Case 100 | 6 | 158,504,518 | 159,178,307 | 2 | 0 | 2 | 1 |
| Case 100 | 6 | 159,178,316 | 159,857,915 | 3 | 0 | 3 | 1 |
| Case 100 | 6 | 159,860,514 | 160,102,593 | 2 | 0 | 2 | 1 |
| Case 100 | 6 | 160,102,710 | 160,251,955 | 3 | 0 | 3 | 1 |
| Case 100 | 6 | 160,255,243 | 160,448,324 | 2 | 0 | 2 | 1 |
| Case 100 | 6 | 160,448,336 | 160,526,016 | 3 | 0 | 3 | 1 |
| Case 100 | 6 | 160,527,180 | 160,548,690 | 2 | 0 | 2 | 1 |
| Case 100 | 6 | 160,549,037 | 160,799,606 | 3 | 0 | 3 | 1 |
| Case 100 | 6 | 160,802,239 | 162,068,565 | 2 | 0 | 2 | 1 |
| Case 100 | 6 | 162,069,569 | 162,238,518 | 3 | 0 | 3 | 1 |
| Case 100 | 6 | 162,242,404 | 163,534,740 | 2 | 0 | 2 | 1 |
| Case 100 | 6 | 163,536,607 | 164,721,435 | 3 | 0 | 3 | 1 |
| Case 100 | 6 | 164,721,947 | 165,494,322 | 2 | 0 | 2 | 1 |
| Case 100 | 6 | 165,495,999 | 166,561,712 | 3 | 0 | 3 | 1 |
| Case 100 | 6 | 166,562,346 | 166,836,744 | 2 | 0 | 2 | 1 |
| Case 100 | 6 | 166,838,291 | 168,439,279 | 3 | 0 | 3 | 1 |
| Case 100 | 6 | 168,439,301 | 168,543,303 | 2 | 0 | 2 | 1 |
| Case 100 | 6 | 168,546,852 | 168,708,369 | 3 | 0 | 3 | 1 |
| Case 100 | 6 | 168,708,377 | 168,801,934 | 2 | 0 | 2 | 1 |
| Case 100 | 6 | 168,805,887 | 169,463,997 | 3 | 0 | 3 | 1 |
| Case 100 | 6 | 169,464,306 | 169,756,921 | 2 | 0 | 2 | 1 |
| Case 100 | 6 | 169,763,254 | 170,070,703 | 3 | 0 | 3 | 1 |
| Case 100 | 6 | 170,070,723 | 170,155,444 | 2 | 0 | 2 | 1 |
| Case 100 | 6 | 170,155,460 | 170,980,171 | 3 | 0 | 3 | 1 |
| Case 100 | 7 | 44,935      | 883,107     | 2 | 1 | 3 | 0 |
| Case 100 | 7 | 884,665     | 971,124     | 2 | 2 | 4 | 0 |
| Case 100 | 7 | 975,046     | 4,820,940   | 2 | 1 | 3 | 0 |
| Case 100 | 7 | 4,821,257   | 4,843,307   | 1 | 1 | 2 | 0 |
| Case 100 | 7 | 4,843,335   | 5,521,534   | 2 | 1 | 3 | 0 |
| Case 100 | 7 | 5,524,805   | 5,643,663   | 3 | 0 | 3 | 1 |
| Case 100 | 7 | 5,644,693   | 15,852,195  | 2 | 1 | 3 | 0 |
| Case 100 | 7 | 15,859,501  | 15,884,675  | 3 | 0 | 3 | 1 |
| Case 100 | 7 | 15,889,830  | 23,768,907  | 2 | 1 | 3 | 0 |
| Case 100 | 7 | 23,771,484  | 44,713,264  | 2 | 2 | 4 | 0 |
| Case 100 | 7 | 44,713,691  | 45,148,814  | 2 | 1 | 3 | 0 |
| Case 100 | 7 | 45,150,331  | 55,718,401  | 2 | 2 | 4 | 0 |
| Case 100 | 7 | 55,718,702  | 58,019,061  | 3 | 0 | 3 | 1 |
| Case 100 | 7 | 61,056,053  | 66,453,413  | 3 | 0 | 3 | 1 |
| Case 100 | 7 | 66,453,476  | 68,508,645  | 2 | 2 | 4 | 0 |
| Case 100 | 7 | 68,514,117  | 68,908,066  | 2 | 1 | 3 | 0 |
| Case 100 | 7 | 68,910,326  | 71,152,622  | 2 | 2 | 4 | 0 |
| Case 100 | 7 | 71,154,079  | 75,946,763  | 2 | 1 | 3 | 0 |
| Case 100 | 7 | 75,951,230  | 87,215,114  | 3 | 1 | 4 | 0 |
| Case 100 | 7 | 87,215,304  | 87,225,252  | 3 | 2 | 5 | 0 |

|          |   |             |             |   |   |   |   |
|----------|---|-------------|-------------|---|---|---|---|
| Case 100 | 7 | 87,225,312  | 89,215,545  | 4 | 1 | 5 | 0 |
| Case 100 | 7 | 89,218,446  | 89,218,446  | 2 | 2 | 4 | 0 |
| Case 100 | 7 | 89,254,213  | 89,321,267  | 2 | 1 | 3 | 0 |
| Case 100 | 7 | 89,332,591  | 89,861,890  | 2 | 2 | 4 | 0 |
| Case 100 | 7 | 89,861,957  | 90,630,558  | 2 | 1 | 3 | 0 |
| Case 100 | 7 | 90,630,720  | 90,825,228  | 2 | 2 | 4 | 0 |
| Case 100 | 7 | 90,828,977  | 92,734,065  | 2 | 1 | 3 | 0 |
| Case 100 | 7 | 92,734,285  | 93,108,681  | 2 | 2 | 4 | 0 |
| Case 100 | 7 | 93,116,243  | 94,252,671  | 2 | 1 | 3 | 0 |
| Case 100 | 7 | 94,253,617  | 94,926,585  | 2 | 2 | 4 | 0 |
| Case 100 | 7 | 94,927,242  | 95,301,853  | 2 | 1 | 3 | 0 |
| Case 100 | 7 | 95,315,537  | 95,794,801  | 2 | 2 | 4 | 0 |
| Case 100 | 7 | 95,800,784  | 96,719,140  | 2 | 1 | 3 | 0 |
| Case 100 | 7 | 96,724,452  | 97,193,864  | 1 | 1 | 2 | 0 |
| Case 100 | 7 | 97,195,851  | 97,273,056  | 2 | 1 | 3 | 0 |
| Case 100 | 7 | 97,281,912  | 97,595,215  | 3 | 0 | 3 | 1 |
| Case 100 | 7 | 97,602,656  | 97,647,191  | 2 | 1 | 3 | 0 |
| Case 100 | 7 | 97,653,811  | 97,796,093  | 1 | 1 | 2 | 0 |
| Case 100 | 7 | 97,807,316  | 99,461,219  | 2 | 1 | 3 | 0 |
| Case 100 | 7 | 99,461,225  | 99,696,978  | 2 | 2 | 4 | 0 |
| Case 100 | 7 | 99,696,984  | 100,781,909 | 2 | 1 | 3 | 0 |
| Case 100 | 7 | 100,782,081 | 100,839,253 | 1 | 1 | 2 | 0 |
| Case 100 | 7 | 100,839,291 | 101,647,143 | 2 | 1 | 3 | 0 |
| Case 100 | 7 | 101,649,622 | 101,835,352 | 3 | 0 | 3 | 1 |
| Case 100 | 7 | 101,840,206 | 103,391,409 | 2 | 1 | 3 | 0 |
| Case 100 | 7 | 103,392,761 | 104,303,928 | 2 | 2 | 4 | 0 |
| Case 100 | 7 | 104,304,300 | 105,321,923 | 2 | 1 | 3 | 0 |
| Case 100 | 7 | 105,322,023 | 105,394,489 | 1 | 1 | 2 | 0 |
| Case 100 | 7 | 105,394,542 | 105,603,809 | 2 | 1 | 3 | 0 |
| Case 100 | 7 | 105,604,722 | 106,214,257 | 2 | 2 | 4 | 0 |
| Case 100 | 7 | 106,214,277 | 107,626,770 | 2 | 1 | 3 | 0 |
| Case 100 | 7 | 107,638,236 | 107,678,977 | 2 | 2 | 4 | 0 |
| Case 100 | 7 | 107,683,100 | 109,217,197 | 2 | 1 | 3 | 0 |
| Case 100 | 7 | 109,222,164 | 109,407,682 | 2 | 2 | 4 | 0 |
| Case 100 | 7 | 109,408,487 | 110,172,048 | 2 | 1 | 3 | 0 |
| Case 100 | 7 | 110,172,394 | 111,069,946 | 2 | 2 | 4 | 0 |
| Case 100 | 7 | 111,073,710 | 111,430,652 | 2 | 1 | 3 | 0 |
| Case 100 | 7 | 111,430,661 | 111,820,439 | 2 | 2 | 4 | 0 |
| Case 100 | 7 | 111,820,664 | 112,424,474 | 2 | 1 | 3 | 0 |
| Case 100 | 7 | 112,424,547 | 112,723,093 | 3 | 0 | 3 | 1 |
| Case 100 | 7 | 112,724,417 | 113,327,166 | 2 | 2 | 4 | 0 |
| Case 100 | 7 | 113,333,114 | 114,304,425 | 2 | 1 | 3 | 0 |
| Case 100 | 7 | 114,304,969 | 115,807,797 | 2 | 2 | 4 | 0 |
| Case 100 | 7 | 115,817,269 | 116,182,419 | 2 | 1 | 3 | 0 |
| Case 100 | 7 | 116,186,241 | 116,955,306 | 2 | 2 | 4 | 0 |
| Case 100 | 7 | 116,960,720 | 117,431,755 | 2 | 1 | 3 | 0 |
| Case 100 | 7 | 117,431,971 | 117,576,675 | 2 | 2 | 4 | 0 |
| Case 100 | 7 | 117,577,359 | 117,679,958 | 2 | 1 | 3 | 0 |
| Case 100 | 7 | 117,682,101 | 118,935,374 | 1 | 1 | 2 | 0 |
| Case 100 | 7 | 118,970,521 | 120,017,847 | 2 | 1 | 3 | 0 |
| Case 100 | 7 | 120,035,706 | 120,364,028 | 2 | 2 | 4 | 0 |
| Case 100 | 7 | 120,372,127 | 121,162,276 | 2 | 1 | 3 | 0 |
| Case 100 | 7 | 121,165,809 | 121,653,419 | 2 | 2 | 4 | 0 |
| Case 100 | 7 | 121,653,532 | 121,944,239 | 2 | 1 | 3 | 0 |
| Case 100 | 7 | 121,944,527 | 122,774,729 | 2 | 2 | 4 | 0 |
| Case 100 | 7 | 122,777,190 | 123,855,507 | 2 | 1 | 3 | 0 |
| Case 100 | 7 | 123,858,915 | 125,092,157 | 2 | 2 | 4 | 0 |
| Case 100 | 7 | 125,104,792 | 125,405,105 | 2 | 1 | 3 | 0 |
| Case 100 | 7 | 125,405,273 | 125,961,043 | 1 | 1 | 2 | 0 |
| Case 100 | 7 | 125,972,744 | 126,006,996 | 2 | 1 | 3 | 0 |
| Case 100 | 7 | 126,022,653 | 126,737,888 | 2 | 2 | 4 | 0 |

|          |   |             |             |   |   |   |   |
|----------|---|-------------|-------------|---|---|---|---|
| Case 100 | 7 | 126,739,691 | 127,778,512 | 2 | 1 | 3 | 0 |
| Case 100 | 7 | 127,785,381 | 127,864,005 | 2 | 2 | 4 | 0 |
| Case 100 | 7 | 127,865,816 | 128,587,524 | 2 | 1 | 3 | 0 |
| Case 100 | 7 | 128,588,831 | 128,843,429 | 1 | 1 | 2 | 0 |
| Case 100 | 7 | 128,845,097 | 130,388,801 | 2 | 1 | 3 | 0 |
| Case 100 | 7 | 130,391,504 | 130,641,577 | 2 | 2 | 4 | 0 |
| Case 100 | 7 | 130,651,215 | 130,919,350 | 2 | 1 | 3 | 0 |
| Case 100 | 7 | 130,922,209 | 130,983,641 | 1 | 1 | 2 | 0 |
| Case 100 | 7 | 130,983,818 | 131,010,943 | 2 | 1 | 3 | 0 |
| Case 100 | 7 | 131,021,956 | 131,027,214 | 1 | 1 | 2 | 0 |
| Case 100 | 7 | 131,029,996 | 131,222,808 | 2 | 2 | 4 | 0 |
| Case 100 | 7 | 131,222,935 | 131,222,935 | 2 | 1 | 3 | 0 |
| Case 100 | 7 | 131,223,177 | 131,300,258 | 3 | 0 | 3 | 1 |
| Case 100 | 7 | 131,301,614 | 132,813,492 | 2 | 2 | 4 | 0 |
| Case 100 | 7 | 132,813,934 | 133,103,048 | 2 | 1 | 3 | 0 |
| Case 100 | 7 | 133,105,815 | 133,848,257 | 1 | 1 | 2 | 0 |
| Case 100 | 7 | 133,848,293 | 134,215,396 | 2 | 1 | 3 | 0 |
| Case 100 | 7 | 134,215,403 | 134,627,147 | 2 | 2 | 4 | 0 |
| Case 100 | 7 | 134,628,088 | 134,972,291 | 3 | 0 | 3 | 1 |
| Case 100 | 7 | 134,972,466 | 135,488,621 | 2 | 1 | 3 | 0 |
| Case 100 | 7 | 135,491,262 | 135,901,545 | 1 | 1 | 2 | 0 |
| Case 100 | 7 | 135,904,371 | 136,839,390 | 2 | 1 | 3 | 0 |
| Case 100 | 7 | 136,849,386 | 137,210,715 | 2 | 2 | 4 | 0 |
| Case 100 | 7 | 137,213,552 | 137,801,372 | 2 | 1 | 3 | 0 |
| Case 100 | 7 | 137,801,413 | 138,262,634 | 1 | 1 | 2 | 0 |
| Case 100 | 7 | 138,263,965 | 138,982,565 | 2 | 1 | 3 | 0 |
| Case 100 | 7 | 138,983,384 | 143,875,539 | 4 | 1 | 5 | 0 |
| Case 100 | 7 | 143,951,888 | 144,408,433 | 3 | 1 | 4 | 0 |
| Case 100 | 7 | 144,410,028 | 147,926,795 | 2 | 1 | 3 | 0 |
| Case 100 | 7 | 147,931,329 | 148,394,595 | 3 | 1 | 4 | 0 |
| Case 100 | 7 | 148,400,466 | 148,951,289 | 3 | 0 | 3 | 1 |
| Case 100 | 7 | 148,951,401 | 149,381,716 | 2 | 1 | 3 | 0 |
| Case 100 | 7 | 149,384,913 | 149,529,970 | 1 | 1 | 2 | 0 |
| Case 100 | 7 | 149,530,894 | 149,983,201 | 2 | 1 | 3 | 0 |
| Case 100 | 7 | 149,992,342 | 150,081,485 | 1 | 1 | 2 | 0 |
| Case 100 | 7 | 150,084,460 | 150,762,871 | 2 | 1 | 3 | 0 |
| Case 100 | 7 | 150,763,621 | 150,883,761 | 1 | 1 | 2 | 0 |
| Case 100 | 7 | 150,883,892 | 152,143,483 | 2 | 1 | 3 | 0 |
| Case 100 | 7 | 152,152,777 | 152,420,498 | 1 | 1 | 2 | 0 |
| Case 100 | 7 | 152,430,770 | 153,034,805 | 2 | 1 | 3 | 0 |
| Case 100 | 7 | 153,036,049 | 153,070,287 | 2 | 0 | 2 | 1 |
| Case 100 | 7 | 153,071,114 | 153,071,114 | 3 | 0 | 3 | 1 |
| Case 100 | 7 | 153,078,544 | 159,119,486 | 2 | 1 | 3 | 0 |
| Case 100 | 8 | 164,984     | 5,920,629   | 4 | 0 | 4 | 1 |
| Case 100 | 8 | 5,923,150   | 6,356,645   | 3 | 0 | 3 | 1 |
| Case 100 | 8 | 6,356,937   | 8,173,997   | 4 | 0 | 4 | 1 |
| Case 100 | 8 | 8,175,717   | 8,235,297   | 3 | 0 | 3 | 1 |
| Case 100 | 8 | 8,235,321   | 10,466,621  | 4 | 0 | 4 | 1 |
| Case 100 | 8 | 10,466,702  | 10,470,751  | 3 | 0 | 3 | 1 |
| Case 100 | 8 | 10,470,757  | 11,071,057  | 4 | 0 | 4 | 1 |
| Case 100 | 8 | 11,072,549  | 11,072,549  | 3 | 0 | 3 | 1 |
| Case 100 | 8 | 11,073,578  | 12,545,638  | 6 | 0 | 6 | 1 |
| Case 100 | 8 | 12,551,156  | 12,554,743  | 4 | 0 | 4 | 1 |
| Case 100 | 8 | 12,559,475  | 13,766,875  | 7 | 0 | 7 | 1 |
| Case 100 | 8 | 13,777,214  | 21,965,274  | 4 | 0 | 4 | 1 |
| Case 100 | 8 | 21,965,325  | 22,005,750  | 3 | 0 | 3 | 1 |
| Case 100 | 8 | 22,005,885  | 33,260,047  | 4 | 0 | 4 | 1 |
| Case 100 | 8 | 33,264,711  | 33,466,724  | 3 | 0 | 3 | 1 |
| Case 100 | 8 | 33,467,010  | 37,651,477  | 4 | 0 | 4 | 1 |
| Case 100 | 8 | 37,656,183  | 37,702,012  | 3 | 0 | 3 | 1 |
| Case 100 | 8 | 37,702,138  | 38,257,914  | 4 | 0 | 4 | 1 |

|          |   |             |             |   |   |   |   |
|----------|---|-------------|-------------|---|---|---|---|
| Case 100 | 8 | 38,258,455  | 43,791,691  | 3 | 1 | 4 | 0 |
| Case 100 | 8 | 46,886,735  | 50,815,672  | 3 | 1 | 4 | 0 |
| Case 100 | 8 | 50,824,431  | 54,479,940  | 3 | 2 | 5 | 0 |
| Case 100 | 8 | 54,485,315  | 54,866,148  | 2 | 2 | 4 | 0 |
| Case 100 | 8 | 54,866,491  | 61,057,832  | 2 | 1 | 3 | 0 |
| Case 100 | 8 | 61,064,200  | 61,233,439  | 2 | 2 | 4 | 0 |
| Case 100 | 8 | 61,238,290  | 62,605,852  | 3 | 2 | 5 | 0 |
| Case 100 | 8 | 62,617,027  | 69,552,619  | 2 | 2 | 4 | 0 |
| Case 100 | 8 | 69,552,683  | 76,141,132  | 2 | 1 | 3 | 0 |
| Case 100 | 8 | 76,147,954  | 79,374,229  | 2 | 2 | 4 | 0 |
| Case 100 | 8 | 79,394,667  | 81,113,769  | 5 | 2 | 7 | 0 |
| Case 100 | 8 | 81,120,044  | 81,429,892  | 3 | 2 | 5 | 0 |
| Case 100 | 8 | 81,430,748  | 83,271,395  | 4 | 2 | 6 | 0 |
| Case 100 | 8 | 83,271,680  | 83,271,680  | 3 | 0 | 3 | 1 |
| Case 100 | 8 | 83,273,087  | 83,273,087  | 2 | 2 | 4 | 0 |
| Case 100 | 8 | 83,273,096  | 85,284,531  | 5 | 2 | 7 | 0 |
| Case 100 | 8 | 85,295,976  | 98,600,977  | 3 | 2 | 5 | 0 |
| Case 100 | 8 | 98,615,175  | 99,045,883  | 2 | 2 | 4 | 0 |
| Case 100 | 8 | 99,045,978  | 103,572,247 | 3 | 2 | 5 | 0 |
| Case 100 | 8 | 103,572,822 | 103,845,526 | 2 | 2 | 4 | 0 |
| Case 100 | 8 | 103,846,946 | 108,953,881 | 3 | 2 | 5 | 0 |
| Case 100 | 8 | 108,970,309 | 118,088,055 | 5 | 0 | 5 | 1 |
| Case 100 | 8 | 118,113,304 | 120,850,640 | 4 | 1 | 5 | 0 |
| Case 100 | 8 | 120,854,088 | 124,723,631 | 3 | 1 | 4 | 0 |
| Case 100 | 8 | 124,724,982 | 124,734,801 | 3 | 0 | 3 | 1 |
| Case 100 | 8 | 124,741,583 | 129,534,673 | 4 | 1 | 5 | 0 |
| Case 100 | 8 | 129,541,377 | 129,568,078 | 3 | 2 | 5 | 0 |
| Case 100 | 8 | 129,570,064 | 133,104,433 | 4 | 2 | 6 | 0 |
| Case 100 | 8 | 133,105,833 | 133,105,833 | 3 | 0 | 3 | 1 |
| Case 100 | 8 | 133,106,539 | 140,720,163 | 3 | 2 | 5 | 0 |
| Case 100 | 8 | 140,720,412 | 143,051,673 | 2 | 1 | 3 | 0 |
| Case 100 | 8 | 143,057,986 | 143,384,314 | 3 | 1 | 4 | 0 |
| Case 100 | 8 | 143,388,250 | 143,867,047 | 3 | 0 | 3 | 1 |
| Case 100 | 8 | 143,867,905 | 144,413,499 | 4 | 0 | 4 | 1 |
| Case 100 | 8 | 144,416,928 | 144,689,289 | 3 | 0 | 3 | 1 |
| Case 100 | 8 | 144,689,290 | 144,801,322 | 4 | 0 | 4 | 1 |
| Case 100 | 8 | 144,801,569 | 144,894,496 | 3 | 0 | 3 | 1 |
| Case 100 | 8 | 144,895,495 | 144,942,718 | 4 | 0 | 4 | 1 |
| Case 100 | 8 | 144,942,796 | 146,293,414 | 3 | 0 | 3 | 1 |
| Case 100 | 9 | 46,587      | 19,126,476  | 3 | 0 | 3 | 1 |
| Case 100 | 9 | 19,126,565  | 19,308,145  | 2 | 0 | 2 | 1 |
| Case 100 | 9 | 19,316,625  | 32,630,149  | 3 | 0 | 3 | 1 |
| Case 100 | 9 | 32,630,282  | 32,635,424  | 4 | 0 | 4 | 1 |
| Case 100 | 9 | 32,639,519  | 37,501,807  | 3 | 0 | 3 | 1 |
| Case 100 | 9 | 37,503,087  | 37,512,808  | 6 | 0 | 6 | 1 |
| Case 100 | 9 | 37,518,130  | 39,103,743  | 3 | 0 | 3 | 1 |
| Case 100 | 9 | 39,179,289  | 46,944,322  | 4 | 0 | 4 | 1 |
| Case 100 | 9 | 65,629,772  | 71,098,881  | 4 | 0 | 4 | 1 |
| Case 100 | 9 | 71,098,912  | 83,898,995  | 5 | 0 | 5 | 1 |
| Case 100 | 9 | 83,909,232  | 84,789,243  | 4 | 0 | 4 | 1 |
| Case 100 | 9 | 84,812,176  | 85,964,563  | 5 | 0 | 5 | 1 |
| Case 100 | 9 | 85,964,735  | 87,177,985  | 4 | 0 | 4 | 1 |
| Case 100 | 9 | 87,179,264  | 88,521,040  | 5 | 0 | 5 | 1 |
| Case 100 | 9 | 88,530,616  | 88,859,144  | 4 | 0 | 4 | 1 |
| Case 100 | 9 | 88,860,336  | 90,004,329  | 5 | 0 | 5 | 1 |
| Case 100 | 9 | 90,006,563  | 91,254,321  | 4 | 0 | 4 | 1 |
| Case 100 | 9 | 91,255,143  | 95,378,704  | 5 | 0 | 5 | 1 |
| Case 100 | 9 | 95,381,802  | 96,080,765  | 4 | 0 | 4 | 1 |
| Case 100 | 9 | 96,080,783  | 97,015,630  | 5 | 0 | 5 | 1 |
| Case 100 | 9 | 97,016,558  | 97,700,731  | 4 | 0 | 4 | 1 |
| Case 100 | 9 | 97,702,500  | 97,789,745  | 3 | 0 | 3 | 1 |

|          |    |             |             |   |   |   |   |
|----------|----|-------------|-------------|---|---|---|---|
| Case 100 | 9  | 97,795,004  | 98,970,911  | 5 | 0 | 5 | 1 |
| Case 100 | 9  | 98,972,430  | 100,194,441 | 4 | 0 | 4 | 1 |
| Case 100 | 9  | 100,194,825 | 119,719,068 | 5 | 0 | 5 | 1 |
| Case 100 | 9  | 119,719,162 | 138,440,654 | 4 | 1 | 5 | 0 |
| Case 100 | 9  | 138,445,655 | 138,445,655 | 3 | 2 | 5 | 0 |
| Case 100 | 9  | 138,445,974 | 139,391,101 | 6 | 0 | 6 | 1 |
| Case 100 | 9  | 139,391,200 | 139,391,200 | 3 | 0 | 3 | 1 |
| Case 100 | 9  | 139,391,211 | 141,066,491 | 4 | 1 | 5 | 0 |
| Case 100 | 10 | 98,087      | 3,176,389   | 1 | 1 | 2 | 0 |
| Case 100 | 10 | 3,176,456   | 3,202,059   | 2 | 1 | 3 | 0 |
| Case 100 | 10 | 3,202,065   | 27,132,619  | 2 | 0 | 2 | 1 |
| Case 100 | 10 | 27,150,093  | 28,097,311  | 3 | 0 | 3 | 1 |
| Case 100 | 10 | 28,100,491  | 28,326,775  | 4 | 0 | 4 | 1 |
| Case 100 | 10 | 28,335,730  | 29,548,285  | 3 | 0 | 3 | 1 |
| Case 100 | 10 | 29,549,209  | 39,097,912  | 2 | 0 | 2 | 1 |
| Case 100 | 10 | 42,436,301  | 43,264,591  | 2 | 0 | 2 | 1 |
| Case 100 | 10 | 43,265,422  | 43,467,392  | 3 | 0 | 3 | 1 |
| Case 100 | 10 | 43,471,575  | 44,053,193  | 2 | 0 | 2 | 1 |
| Case 100 | 10 | 44,053,340  | 44,494,546  | 1 | 1 | 2 | 0 |
| Case 100 | 10 | 44,501,460  | 44,830,727  | 2 | 1 | 3 | 0 |
| Case 100 | 10 | 44,833,031  | 46,999,958  | 1 | 1 | 2 | 0 |
| Case 100 | 10 | 47,000,019  | 47,412,588  | 2 | 1 | 3 | 0 |
| Case 100 | 10 | 47,543,322  | 50,108,293  | 1 | 1 | 2 | 0 |
| Case 100 | 10 | 50,109,223  | 50,870,745  | 2 | 1 | 3 | 0 |
| Case 100 | 10 | 50,870,806  | 51,543,344  | 1 | 1 | 2 | 0 |
| Case 100 | 10 | 51,544,143  | 51,592,523  | 2 | 0 | 2 | 1 |
| Case 100 | 10 | 51,592,586  | 60,928,800  | 1 | 1 | 2 | 0 |
| Case 100 | 10 | 60,929,485  | 61,064,655  | 2 | 1 | 3 | 0 |
| Case 100 | 10 | 61,067,088  | 61,287,001  | 4 | 1 | 5 | 0 |
| Case 100 | 10 | 61,294,973  | 62,105,053  | 3 | 1 | 4 | 0 |
| Case 100 | 10 | 62,136,206  | 63,166,773  | 4 | 1 | 5 | 0 |
| Case 100 | 10 | 63,167,132  | 66,483,216  | 3 | 1 | 4 | 0 |
| Case 100 | 10 | 66,484,138  | 68,721,071  | 2 | 1 | 3 | 0 |
| Case 100 | 10 | 68,722,086  | 69,609,540  | 3 | 0 | 3 | 1 |
| Case 100 | 10 | 69,622,535  | 69,727,722  | 2 | 1 | 3 | 0 |
| Case 100 | 10 | 69,729,895  | 71,175,609  | 1 | 1 | 2 | 0 |
| Case 100 | 10 | 71,175,781  | 71,357,954  | 2 | 1 | 3 | 0 |
| Case 100 | 10 | 71,360,884  | 71,547,724  | 1 | 1 | 2 | 0 |
| Case 100 | 10 | 71,549,168  | 71,739,556  | 2 | 1 | 3 | 0 |
| Case 100 | 10 | 71,740,691  | 71,876,382  | 1 | 1 | 2 | 0 |
| Case 100 | 10 | 71,876,390  | 71,921,643  | 2 | 1 | 3 | 0 |
| Case 100 | 10 | 71,922,900  | 71,992,518  | 1 | 1 | 2 | 0 |
| Case 100 | 10 | 72,004,454  | 72,192,832  | 2 | 1 | 3 | 0 |
| Case 100 | 10 | 72,193,854  | 72,537,086  | 1 | 1 | 2 | 0 |
| Case 100 | 10 | 72,537,873  | 72,654,600  | 2 | 1 | 3 | 0 |
| Case 100 | 10 | 72,655,450  | 72,756,178  | 2 | 2 | 4 | 0 |
| Case 100 | 10 | 72,757,521  | 73,129,458  | 2 | 1 | 3 | 0 |
| Case 100 | 10 | 73,135,919  | 73,295,121  | 1 | 1 | 2 | 0 |
| Case 100 | 10 | 73,295,341  | 73,826,785  | 2 | 1 | 3 | 0 |
| Case 100 | 10 | 73,826,849  | 75,135,945  | 1 | 1 | 2 | 0 |
| Case 100 | 10 | 75,135,964  | 75,407,141  | 2 | 1 | 3 | 0 |
| Case 100 | 10 | 75,407,176  | 75,521,251  | 1 | 1 | 2 | 0 |
| Case 100 | 10 | 75,523,634  | 75,708,906  | 2 | 1 | 3 | 0 |
| Case 100 | 10 | 75,727,098  | 77,683,563  | 1 | 1 | 2 | 0 |
| Case 100 | 10 | 77,687,528  | 77,915,310  | 2 | 1 | 3 | 0 |
| Case 100 | 10 | 77,915,582  | 78,644,260  | 1 | 1 | 2 | 0 |
| Case 100 | 10 | 78,645,453  | 79,166,345  | 2 | 1 | 3 | 0 |
| Case 100 | 10 | 79,167,461  | 79,551,640  | 1 | 1 | 2 | 0 |
| Case 100 | 10 | 79,552,206  | 79,937,796  | 2 | 1 | 3 | 0 |
| Case 100 | 10 | 79,937,988  | 80,238,142  | 2 | 2 | 4 | 0 |
| Case 100 | 10 | 80,241,441  | 80,527,255  | 2 | 1 | 3 | 0 |

|          |    |             |             |   |   |   |   |
|----------|----|-------------|-------------|---|---|---|---|
| Case 100 | 10 | 80,529,202  | 80,852,602  | 2 | 2 | 4 | 0 |
| Case 100 | 10 | 80,853,407  | 80,854,255  | 2 | 1 | 3 | 0 |
| Case 100 | 10 | 80,854,413  | 80,955,507  | 1 | 1 | 2 | 0 |
| Case 100 | 10 | 80,957,694  | 81,198,038  | 2 | 1 | 3 | 0 |
| Case 100 | 10 | 81,208,964  | 82,369,219  | 1 | 1 | 2 | 0 |
| Case 100 | 10 | 82,369,226  | 82,405,083  | 2 | 1 | 3 | 0 |
| Case 100 | 10 | 82,405,254  | 87,300,044  | 1 | 1 | 2 | 0 |
| Case 100 | 10 | 87,300,091  | 87,734,387  | 2 | 1 | 3 | 0 |
| Case 100 | 10 | 87,736,238  | 99,150,277  | 1 | 1 | 2 | 0 |
| Case 100 | 10 | 99,150,567  | 99,220,454  | 2 | 1 | 3 | 0 |
| Case 100 | 10 | 99,220,707  | 99,635,324  | 1 | 1 | 2 | 0 |
| Case 100 | 10 | 99,635,777  | 100,003,875 | 2 | 1 | 3 | 0 |
| Case 100 | 10 | 100,008,436 | 100,080,631 | 1 | 1 | 2 | 0 |
| Case 100 | 10 | 100,081,443 | 100,241,204 | 2 | 1 | 3 | 0 |
| Case 100 | 10 | 100,242,039 | 101,578,952 | 1 | 1 | 2 | 0 |
| Case 100 | 10 | 101,587,569 | 101,645,498 | 2 | 1 | 3 | 0 |
| Case 100 | 10 | 101,646,205 | 101,826,686 | 1 | 1 | 2 | 0 |
| Case 100 | 10 | 101,829,514 | 102,013,179 | 2 | 0 | 2 | 1 |
| Case 100 | 10 | 102,016,044 | 102,057,262 | 3 | 0 | 3 | 1 |
| Case 100 | 10 | 102,057,362 | 102,062,074 | 2 | 0 | 2 | 1 |
| Case 100 | 10 | 102,063,560 | 102,364,004 | 1 | 1 | 2 | 0 |
| Case 100 | 10 | 102,368,159 | 102,668,856 | 2 | 1 | 3 | 0 |
| Case 100 | 10 | 102,671,965 | 105,795,288 | 1 | 1 | 2 | 0 |
| Case 100 | 10 | 105,797,378 | 105,815,609 | 2 | 1 | 3 | 0 |
| Case 100 | 10 | 105,815,646 | 105,906,045 | 1 | 1 | 2 | 0 |
| Case 100 | 10 | 105,906,086 | 105,974,122 | 2 | 1 | 3 | 0 |
| Case 100 | 10 | 105,983,609 | 106,377,705 | 1 | 1 | 2 | 0 |
| Case 100 | 10 | 106,384,631 | 106,571,525 | 2 | 1 | 3 | 0 |
| Case 100 | 10 | 106,578,005 | 109,519,015 | 1 | 1 | 2 | 0 |
| Case 100 | 10 | 109,519,074 | 118,401,721 | 2 | 1 | 3 | 0 |
| Case 100 | 10 | 118,402,207 | 118,444,339 | 3 | 0 | 3 | 1 |
| Case 100 | 10 | 118,448,078 | 121,274,163 | 2 | 1 | 3 | 0 |
| Case 100 | 10 | 121,275,903 | 121,394,687 | 1 | 1 | 2 | 0 |
| Case 100 | 10 | 121,397,276 | 122,521,706 | 2 | 1 | 3 | 0 |
| Case 100 | 10 | 122,526,305 | 122,573,258 | 3 | 0 | 3 | 1 |
| Case 100 | 10 | 122,578,338 | 123,845,322 | 2 | 1 | 3 | 0 |
| Case 100 | 10 | 123,845,389 | 123,853,004 | 2 | 0 | 2 | 1 |
| Case 100 | 10 | 123,855,878 | 125,261,923 | 3 | 0 | 3 | 1 |
| Case 100 | 10 | 125,262,764 | 134,979,963 | 2 | 1 | 3 | 0 |
| Case 100 | 10 | 134,980,891 | 135,015,202 | 1 | 1 | 2 | 0 |
| Case 100 | 10 | 135,023,586 | 135,060,864 | 2 | 1 | 3 | 0 |
| Case 100 | 10 | 135,061,804 | 135,099,053 | 1 | 1 | 2 | 0 |
| Case 100 | 10 | 135,102,440 | 135,477,883 | 2 | 1 | 3 | 0 |
| Case 100 | 11 | 193,146     | 1,015,021   | 3 | 0 | 3 | 1 |
| Case 100 | 11 | 1,015,786   | 1,019,413   | 5 | 0 | 5 | 1 |
| Case 100 | 11 | 1,020,722   | 44,993,507  | 3 | 0 | 3 | 1 |
| Case 100 | 11 | 44,994,060  | 45,001,728  | 2 | 2 | 4 | 0 |
| Case 100 | 11 | 45,009,133  | 45,832,716  | 4 | 2 | 6 | 0 |
| Case 100 | 11 | 45,832,845  | 48,747,611  | 3 | 2 | 5 | 0 |
| Case 100 | 11 | 48,754,534  | 50,170,337  | 3 | 1 | 4 | 0 |
| Case 100 | 11 | 50,179,838  | 50,566,719  | 2 | 1 | 3 | 0 |
| Case 100 | 11 | 50,629,850  | 51,479,648  | 3 | 0 | 3 | 1 |
| Case 100 | 11 | 51,481,576  | 51,591,253  | 2 | 1 | 3 | 0 |
| Case 100 | 11 | 54,794,237  | 55,091,574  | 2 | 1 | 3 | 0 |
| Case 100 | 11 | 55,109,244  | 64,557,051  | 3 | 1 | 4 | 0 |
| Case 100 | 11 | 64,557,054  | 64,678,098  | 2 | 1 | 3 | 0 |
| Case 100 | 11 | 64,678,109  | 65,385,138  | 3 | 1 | 4 | 0 |
| Case 100 | 11 | 65,385,456  | 65,420,760  | 2 | 1 | 3 | 0 |
| Case 100 | 11 | 65,421,117  | 66,359,781  | 3 | 1 | 4 | 0 |
| Case 100 | 11 | 66,359,958  | 67,283,275  | 2 | 1 | 3 | 0 |
| Case 100 | 11 | 67,286,075  | 72,946,190  | 3 | 1 | 4 | 0 |

|          |    |             |             |   |   |   |   |
|----------|----|-------------|-------------|---|---|---|---|
| Case 100 | 11 | 72,946,204  | 73,106,283  | 2 | 1 | 3 | 0 |
| Case 100 | 11 | 73,106,294  | 89,405,190  | 3 | 1 | 4 | 0 |
| Case 100 | 11 | 89,413,795  | 95,621,376  | 2 | 1 | 3 | 0 |
| Case 100 | 11 | 95,634,278  | 99,722,295  | 2 | 2 | 4 | 0 |
| Case 100 | 11 | 99,726,369  | 100,793,518 | 2 | 0 | 2 | 1 |
| Case 100 | 11 | 100,793,689 | 104,896,114 | 2 | 2 | 4 | 0 |
| Case 100 | 11 | 104,897,049 | 104,955,489 | 2 | 1 | 3 | 0 |
| Case 100 | 11 | 104,958,571 | 108,106,443 | 2 | 2 | 4 | 0 |
| Case 100 | 11 | 108,114,727 | 108,219,339 | 2 | 1 | 3 | 0 |
| Case 100 | 11 | 108,225,661 | 114,952,843 | 2 | 2 | 4 | 0 |
| Case 100 | 11 | 114,958,994 | 116,707,684 | 2 | 1 | 3 | 0 |
| Case 100 | 11 | 116,707,736 | 117,201,682 | 3 | 0 | 3 | 1 |
| Case 100 | 11 | 117,213,189 | 124,094,783 | 2 | 1 | 3 | 0 |
| Case 100 | 11 | 124,095,414 | 126,837,505 | 2 | 2 | 4 | 0 |
| Case 100 | 11 | 126,841,619 | 127,065,614 | 3 | 0 | 3 | 1 |
| Case 100 | 11 | 127,069,182 | 128,602,827 | 2 | 0 | 2 | 1 |
| Case 100 | 11 | 128,604,010 | 128,727,063 | 3 | 0 | 3 | 1 |
| Case 100 | 11 | 128,729,845 | 129,616,272 | 2 | 2 | 4 | 0 |
| Case 100 | 11 | 129,618,046 | 130,909,809 | 2 | 0 | 2 | 1 |
| Case 100 | 11 | 130,910,718 | 131,291,728 | 3 | 0 | 3 | 1 |
| Case 100 | 11 | 131,294,432 | 131,971,074 | 2 | 0 | 2 | 1 |
| Case 100 | 11 | 131,975,551 | 132,325,814 | 3 | 0 | 3 | 1 |
| Case 100 | 11 | 132,327,660 | 133,320,225 | 2 | 0 | 2 | 1 |
| Case 100 | 11 | 133,320,967 | 133,787,549 | 3 | 0 | 3 | 1 |
| Case 100 | 11 | 133,788,992 | 134,411,809 | 2 | 0 | 2 | 1 |
| Case 100 | 11 | 134,411,914 | 134,934,063 | 3 | 0 | 3 | 1 |
| Case 100 | 12 | 191,619     | 644,337     | 5 | 0 | 5 | 1 |
| Case 100 | 12 | 644,394     | 1,216,632   | 4 | 0 | 4 | 1 |
| Case 100 | 12 | 1,219,440   | 7,735,319   | 5 | 0 | 5 | 1 |
| Case 100 | 12 | 7,756,706   | 9,256,972   | 4 | 0 | 4 | 1 |
| Case 100 | 12 | 9,258,834   | 31,145,726  | 5 | 0 | 5 | 1 |
| Case 100 | 12 | 31,146,534  | 33,085,304  | 4 | 0 | 4 | 1 |
| Case 100 | 12 | 33,089,955  | 34,160,187  | 5 | 0 | 5 | 1 |
| Case 100 | 12 | 34,161,084  | 34,853,011  | 4 | 0 | 4 | 1 |
| Case 100 | 12 | 37,876,400  | 38,801,746  | 4 | 0 | 4 | 1 |
| Case 100 | 12 | 38,802,811  | 42,118,642  | 5 | 0 | 5 | 1 |
| Case 100 | 12 | 42,119,127  | 49,355,036  | 4 | 0 | 4 | 1 |
| Case 100 | 12 | 49,355,292  | 49,434,252  | 3 | 0 | 3 | 1 |
| Case 100 | 12 | 49,434,417  | 53,452,217  | 4 | 0 | 4 | 1 |
| Case 100 | 12 | 53,452,510  | 53,454,938  | 3 | 0 | 3 | 1 |
| Case 100 | 12 | 53,455,228  | 56,029,584  | 4 | 0 | 4 | 1 |
| Case 100 | 12 | 56,030,092  | 56,221,528  | 3 | 0 | 3 | 1 |
| Case 100 | 12 | 56,221,752  | 71,548,890  | 4 | 0 | 4 | 1 |
| Case 100 | 12 | 71,551,461  | 73,669,855  | 3 | 0 | 3 | 1 |
| Case 100 | 12 | 73,670,532  | 76,424,615  | 3 | 1 | 4 | 0 |
| Case 100 | 12 | 76,424,644  | 77,142,817  | 2 | 1 | 3 | 0 |
| Case 100 | 12 | 77,144,338  | 112,130,674 | 3 | 1 | 4 | 0 |
| Case 100 | 12 | 112,131,698 | 112,794,714 | 2 | 1 | 3 | 0 |
| Case 100 | 12 | 112,812,282 | 120,369,049 | 3 | 1 | 4 | 0 |
| Case 100 | 12 | 120,377,392 | 120,608,031 | 3 | 0 | 3 | 1 |
| Case 100 | 12 | 120,609,325 | 121,416,828 | 3 | 1 | 4 | 0 |
| Case 100 | 12 | 121,416,864 | 121,419,056 | 3 | 0 | 3 | 1 |
| Case 100 | 12 | 121,420,260 | 121,471,363 | 2 | 1 | 3 | 0 |
| Case 100 | 12 | 121,476,124 | 122,720,455 | 3 | 1 | 4 | 0 |
| Case 100 | 12 | 122,723,570 | 123,112,806 | 3 | 0 | 3 | 1 |
| Case 100 | 12 | 123,124,702 | 123,339,487 | 3 | 1 | 4 | 0 |
| Case 100 | 12 | 123,339,496 | 123,480,054 | 2 | 1 | 3 | 0 |
| Case 100 | 12 | 123,481,019 | 124,097,824 | 3 | 1 | 4 | 0 |
| Case 100 | 12 | 124,098,780 | 124,228,362 | 3 | 0 | 3 | 1 |
| Case 100 | 12 | 124,228,816 | 128,315,329 | 3 | 1 | 4 | 0 |
| Case 100 | 12 | 128,316,195 | 129,235,566 | 4 | 0 | 4 | 1 |

|          |    |             |             |   |   |   |   |
|----------|----|-------------|-------------|---|---|---|---|
| Case 100 | 12 | 129,237,770 | 129,293,372 | 3 | 0 | 3 | 1 |
| Case 100 | 12 | 129,294,881 | 132,679,063 | 3 | 1 | 4 | 0 |
| Case 100 | 12 | 132,681,748 | 132,685,240 | 3 | 0 | 3 | 1 |
| Case 100 | 12 | 132,685,837 | 133,810,935 | 4 | 0 | 4 | 1 |
| Case 100 | 13 | 19,058,717  | 19,631,157  | 3 | 0 | 3 | 1 |
| Case 100 | 13 | 19,634,794  | 21,728,755  | 2 | 1 | 3 | 0 |
| Case 100 | 13 | 21,728,945  | 21,746,637  | 4 | 1 | 5 | 0 |
| Case 100 | 13 | 21,747,051  | 24,268,533  | 2 | 1 | 3 | 0 |
| Case 100 | 13 | 24,269,820  | 24,476,073  | 3 | 0 | 3 | 1 |
| Case 100 | 13 | 24,480,775  | 25,292,270  | 2 | 1 | 3 | 0 |
| Case 100 | 13 | 25,296,819  | 25,573,308  | 3 | 0 | 3 | 1 |
| Case 100 | 13 | 25,573,633  | 28,691,097  | 2 | 1 | 3 | 0 |
| Case 100 | 13 | 28,704,081  | 28,862,066  | 1 | 1 | 2 | 0 |
| Case 100 | 13 | 28,866,586  | 32,785,818  | 2 | 1 | 3 | 0 |
| Case 100 | 13 | 32,789,242  | 33,479,754  | 3 | 0 | 3 | 1 |
| Case 100 | 13 | 33,479,823  | 43,469,222  | 2 | 1 | 3 | 0 |
| Case 100 | 13 | 43,471,403  | 43,773,176  | 3 | 1 | 4 | 0 |
| Case 100 | 13 | 43,773,499  | 55,958,772  | 2 | 1 | 3 | 0 |
| Case 100 | 13 | 55,968,185  | 57,353,552  | 3 | 0 | 3 | 1 |
| Case 100 | 13 | 57,353,820  | 70,248,289  | 2 | 1 | 3 | 0 |
| Case 100 | 13 | 70,248,590  | 70,397,216  | 3 | 0 | 3 | 1 |
| Case 100 | 13 | 70,399,003  | 79,658,926  | 2 | 1 | 3 | 0 |
| Case 100 | 13 | 79,662,726  | 94,589,117  | 3 | 1 | 4 | 0 |
| Case 100 | 13 | 94,598,974  | 94,598,974  | 2 | 1 | 3 | 0 |
| Case 100 | 13 | 94,612,361  | 94,809,726  | 1 | 1 | 2 | 0 |
| Case 100 | 13 | 94,812,010  | 109,016,132 | 3 | 1 | 4 | 0 |
| Case 100 | 13 | 109,018,983 | 109,051,894 | 3 | 0 | 3 | 1 |
| Case 100 | 13 | 109,057,109 | 115,103,529 | 4 | 0 | 4 | 1 |
| Case 100 | 14 | 19,280,733  | 22,349,233  | 3 | 0 | 3 | 1 |
| Case 100 | 14 | 22,349,495  | 22,978,775  | 4 | 0 | 4 | 1 |
| Case 100 | 14 | 22,979,348  | 24,657,226  | 3 | 0 | 3 | 1 |
| Case 100 | 14 | 24,657,407  | 24,718,357  | 4 | 0 | 4 | 1 |
| Case 100 | 14 | 24,718,515  | 50,100,886  | 3 | 0 | 3 | 1 |
| Case 100 | 14 | 50,101,682  | 50,154,887  | 2 | 0 | 2 | 1 |
| Case 100 | 14 | 50,158,183  | 70,337,050  | 3 | 0 | 3 | 1 |
| Case 100 | 14 | 70,339,755  | 70,756,638  | 4 | 0 | 4 | 1 |
| Case 100 | 14 | 70,757,779  | 88,349,471  | 3 | 0 | 3 | 1 |
| Case 100 | 14 | 88,355,122  | 88,614,541  | 4 | 0 | 4 | 1 |
| Case 100 | 14 | 88,618,902  | 94,623,337  | 3 | 0 | 3 | 1 |
| Case 100 | 14 | 94,623,535  | 95,014,327  | 4 | 0 | 4 | 1 |
| Case 100 | 14 | 95,015,544  | 95,434,430  | 3 | 0 | 3 | 1 |
| Case 100 | 14 | 95,439,228  | 95,847,417  | 4 | 0 | 4 | 1 |
| Case 100 | 14 | 95,847,622  | 99,352,143  | 3 | 0 | 3 | 1 |
| Case 100 | 14 | 99,352,576  | 100,422,683 | 4 | 0 | 4 | 1 |
| Case 100 | 14 | 100,422,842 | 100,820,880 | 3 | 0 | 3 | 1 |
| Case 100 | 14 | 100,820,980 | 101,200,514 | 4 | 0 | 4 | 1 |
| Case 100 | 14 | 101,200,645 | 104,653,844 | 3 | 0 | 3 | 1 |
| Case 100 | 14 | 104,656,659 | 105,052,819 | 4 | 0 | 4 | 1 |
| Case 100 | 14 | 105,052,820 | 105,397,239 | 3 | 0 | 3 | 1 |
| Case 100 | 14 | 105,398,143 | 105,609,043 | 4 | 0 | 4 | 1 |
| Case 100 | 14 | 105,609,046 | 107,287,663 | 3 | 0 | 3 | 1 |
| Case 100 | 15 | 20,034,919  | 26,922,278  | 2 | 1 | 3 | 0 |
| Case 100 | 15 | 26,923,648  | 27,391,724  | 1 | 1 | 2 | 0 |
| Case 100 | 15 | 27,393,731  | 27,532,716  | 2 | 1 | 3 | 0 |
| Case 100 | 15 | 27,539,309  | 27,693,841  | 1 | 1 | 2 | 0 |
| Case 100 | 15 | 27,694,075  | 29,838,096  | 2 | 1 | 3 | 0 |
| Case 100 | 15 | 29,842,521  | 30,304,640  | 1 | 1 | 2 | 0 |
| Case 100 | 15 | 30,307,205  | 31,233,935  | 2 | 0 | 2 | 1 |
| Case 100 | 15 | 31,234,008  | 31,359,348  | 3 | 0 | 3 | 1 |
| Case 100 | 15 | 31,359,377  | 31,369,123  | 2 | 1 | 3 | 0 |
| Case 100 | 15 | 31,369,498  | 31,439,804  | 1 | 1 | 2 | 0 |



|          |    |            |            |   |   |   |   |
|----------|----|------------|------------|---|---|---|---|
| Case 100 | 15 | 31,440,697 | 31,533,464 | 2 | 1 | 3 | 0 |
| Case 100 | 15 | 31,534,087 | 31,791,836 | 1 | 1 | 2 | 0 |
| Case 100 | 15 | 31,793,930 | 33,294,217 | 2 | 1 | 3 | 0 |
| Case 100 | 15 | 33,298,235 | 33,347,933 | 1 | 1 | 2 | 0 |
| Case 100 | 15 | 33,350,534 | 33,391,524 | 2 | 1 | 3 | 0 |
| Case 100 | 15 | 33,391,788 | 33,502,980 | 1 | 1 | 2 | 0 |
| Case 100 | 15 | 33,503,621 | 33,974,031 | 2 | 1 | 3 | 0 |
| Case 100 | 15 | 33,974,316 | 34,356,485 | 3 | 0 | 3 | 1 |
| Case 100 | 15 | 34,358,325 | 34,405,112 | 2 | 0 | 2 | 1 |
| Case 100 | 15 | 34,406,851 | 34,800,595 | 1 | 1 | 2 | 0 |
| Case 100 | 15 | 34,871,296 | 35,006,073 | 2 | 1 | 3 | 0 |
| Case 100 | 15 | 35,006,322 | 35,997,564 | 1 | 1 | 2 | 0 |
| Case 100 | 15 | 36,003,865 | 37,581,276 | 2 | 1 | 3 | 0 |
| Case 100 | 15 | 37,588,952 | 37,898,753 | 1 | 1 | 2 | 0 |
| Case 100 | 15 | 37,899,592 | 37,969,379 | 2 | 1 | 3 | 0 |
| Case 100 | 15 | 37,973,905 | 38,118,653 | 1 | 1 | 2 | 0 |
| Case 100 | 15 | 38,118,873 | 42,144,039 | 2 | 1 | 3 | 0 |
| Case 100 | 15 | 42,144,400 | 42,178,519 | 1 | 1 | 2 | 0 |
| Case 100 | 15 | 42,179,424 | 55,210,705 | 2 | 1 | 3 | 0 |
| Case 100 | 15 | 55,226,219 | 56,207,889 | 1 | 1 | 2 | 0 |
| Case 100 | 15 | 56,207,906 | 56,388,173 | 2 | 1 | 3 | 0 |
| Case 100 | 15 | 56,388,298 | 56,987,023 | 1 | 1 | 2 | 0 |
| Case 100 | 15 | 56,990,983 | 57,391,298 | 2 | 1 | 3 | 0 |
| Case 100 | 15 | 57,391,541 | 57,603,369 | 1 | 1 | 2 | 0 |
| Case 100 | 15 | 57,608,311 | 59,140,329 | 2 | 1 | 3 | 0 |
| Case 100 | 15 | 59,144,018 | 59,458,663 | 1 | 1 | 2 | 0 |
| Case 100 | 15 | 59,464,117 | 59,467,146 | 2 | 1 | 3 | 0 |
| Case 100 | 15 | 59,476,088 | 59,515,767 | 3 | 0 | 3 | 1 |
| Case 100 | 15 | 59,516,391 | 60,220,932 | 2 | 1 | 3 | 0 |
| Case 100 | 15 | 60,221,244 | 60,320,396 | 1 | 1 | 2 | 0 |
| Case 100 | 15 | 60,334,184 | 62,121,608 | 2 | 1 | 3 | 0 |
| Case 100 | 15 | 62,122,798 | 62,359,876 | 1 | 1 | 2 | 0 |
| Case 100 | 15 | 62,360,042 | 63,846,508 | 2 | 1 | 3 | 0 |
| Case 100 | 15 | 63,856,553 | 64,200,682 | 1 | 1 | 2 | 0 |
| Case 100 | 15 | 64,200,766 | 65,226,343 | 2 | 1 | 3 | 0 |
| Case 100 | 15 | 65,226,376 | 65,489,523 | 1 | 1 | 2 | 0 |
| Case 100 | 15 | 65,489,589 | 65,622,077 | 2 | 1 | 3 | 0 |
| Case 100 | 15 | 65,622,889 | 65,682,635 | 1 | 1 | 2 | 0 |
| Case 100 | 15 | 65,684,513 | 66,627,677 | 2 | 1 | 3 | 0 |
| Case 100 | 15 | 66,629,354 | 66,760,342 | 1 | 1 | 2 | 0 |
| Case 100 | 15 | 66,769,184 | 67,078,484 | 2 | 1 | 3 | 0 |
| Case 100 | 15 | 67,081,843 | 67,152,143 | 1 | 1 | 2 | 0 |
| Case 100 | 15 | 67,154,184 | 67,664,707 | 2 | 1 | 3 | 0 |
| Case 100 | 15 | 67,664,900 | 68,245,488 | 1 | 1 | 2 | 0 |
| Case 100 | 15 | 68,247,171 | 72,095,711 | 2 | 1 | 3 | 0 |
| Case 100 | 15 | 72,097,461 | 72,191,104 | 3 | 0 | 3 | 1 |
| Case 100 | 15 | 72,191,110 | 72,459,382 | 2 | 0 | 2 | 1 |
| Case 100 | 15 | 72,459,427 | 72,987,530 | 3 | 0 | 3 | 1 |
| Case 100 | 15 | 72,996,036 | 75,183,935 | 2 | 1 | 3 | 0 |
| Case 100 | 15 | 75,184,084 | 76,304,503 | 1 | 1 | 2 | 0 |
| Case 100 | 15 | 76,313,121 | 76,696,901 | 2 | 1 | 3 | 0 |
| Case 100 | 15 | 76,696,914 | 77,368,682 | 1 | 1 | 2 | 0 |
| Case 100 | 15 | 77,377,654 | 78,981,001 | 2 | 1 | 3 | 0 |
| Case 100 | 15 | 78,985,342 | 79,105,350 | 3 | 0 | 3 | 1 |
| Case 100 | 15 | 79,111,093 | 80,013,532 | 2 | 1 | 3 | 0 |
| Case 100 | 15 | 80,013,872 | 80,164,053 | 1 | 1 | 2 | 0 |
| Case 100 | 15 | 80,165,368 | 89,163,457 | 2 | 1 | 3 | 0 |
| Case 100 | 15 | 89,166,761 | 89,238,255 | 1 | 1 | 2 | 0 |
| Case 100 | 15 | 89,249,139 | 90,126,121 | 2 | 1 | 3 | 0 |
| Case 100 | 15 | 90,126,164 | 90,138,192 | 1 | 1 | 2 | 0 |
| Case 100 | 15 | 90,138,670 | 90,174,824 | 2 | 1 | 3 | 0 |

|          |    |             |             |   |   |   |   |
|----------|----|-------------|-------------|---|---|---|---|
| Case 100 | 15 | 90,174,827  | 90,196,113  | 1 | 1 | 2 | 0 |
| Case 100 | 15 | 90,208,219  | 90,600,049  | 2 | 1 | 3 | 0 |
| Case 100 | 15 | 90,610,517  | 90,784,919  | 1 | 1 | 2 | 0 |
| Case 100 | 15 | 90,784,953  | 91,176,998  | 2 | 1 | 3 | 0 |
| Case 100 | 15 | 91,177,093  | 91,475,018  | 1 | 1 | 2 | 0 |
| Case 100 | 15 | 91,479,553  | 100,383,972 | 2 | 1 | 3 | 0 |
| Case 100 | 15 | 100,385,625 | 100,445,280 | 3 | 0 | 3 | 1 |
| Case 100 | 15 | 100,445,766 | 102,344,571 | 2 | 1 | 3 | 0 |
| Case 100 | 15 | 102,345,993 | 102,461,162 | 3 | 1 | 4 | 0 |
| Case 100 | 16 | 88,165      | 135,460     | 4 | 0 | 4 | 1 |
| Case 100 | 16 | 135,523     | 334,749     | 3 | 0 | 3 | 1 |
| Case 100 | 16 | 334,757     | 1,573,926   | 2 | 1 | 3 | 0 |
| Case 100 | 16 | 1,574,252   | 1,718,068   | 3 | 1 | 4 | 0 |
| Case 100 | 16 | 1,718,110   | 2,766,531   | 2 | 1 | 3 | 0 |
| Case 100 | 16 | 2,768,702   | 2,817,599   | 3 | 1 | 4 | 0 |
| Case 100 | 16 | 2,817,983   | 3,251,522   | 2 | 1 | 3 | 0 |
| Case 100 | 16 | 3,253,133   | 3,294,255   | 3 | 1 | 4 | 0 |
| Case 100 | 16 | 3,296,083   | 14,760,734  | 2 | 1 | 3 | 0 |
| Case 100 | 16 | 14,761,632  | 16,363,239  | 2 | 2 | 4 | 0 |
| Case 100 | 16 | 16,633,361  | 20,430,663  | 2 | 1 | 3 | 0 |
| Case 100 | 16 | 20,432,605  | 20,552,075  | 3 | 1 | 4 | 0 |
| Case 100 | 16 | 20,558,441  | 20,563,528  | 2 | 1 | 3 | 0 |
| Case 100 | 16 | 20,564,300  | 21,031,053  | 3 | 0 | 3 | 1 |
| Case 100 | 16 | 21,033,398  | 31,660,427  | 2 | 1 | 3 | 0 |
| Case 100 | 16 | 31,664,747  | 33,557,021  | 3 | 0 | 3 | 1 |
| Case 100 | 16 | 33,836,510  | 35,285,582  | 2 | 0 | 2 | 1 |
| Case 100 | 16 | 46,450,037  | 47,536,914  | 2 | 0 | 2 | 1 |
| Case 100 | 16 | 47,536,987  | 48,079,134  | 1 | 1 | 2 | 0 |
| Case 100 | 16 | 48,081,896  | 48,231,954  | 2 | 1 | 3 | 0 |
| Case 100 | 16 | 48,232,065  | 49,540,235  | 1 | 1 | 2 | 0 |
| Case 100 | 16 | 49,541,928  | 49,688,918  | 2 | 1 | 3 | 0 |
| Case 100 | 16 | 49,691,925  | 51,128,532  | 1 | 1 | 2 | 0 |
| Case 100 | 16 | 51,130,133  | 51,194,301  | 2 | 1 | 3 | 0 |
| Case 100 | 16 | 51,195,400  | 55,509,900  | 1 | 1 | 2 | 0 |
| Case 100 | 16 | 55,511,537  | 55,533,270  | 2 | 1 | 3 | 0 |
| Case 100 | 16 | 55,536,622  | 57,912,679  | 1 | 1 | 2 | 0 |
| Case 100 | 16 | 57,915,124  | 57,953,314  | 2 | 1 | 3 | 0 |
| Case 100 | 16 | 57,953,715  | 65,647,119  | 1 | 1 | 2 | 0 |
| Case 100 | 16 | 65,652,630  | 65,865,946  | 2 | 1 | 3 | 0 |
| Case 100 | 16 | 65,868,244  | 66,117,549  | 1 | 1 | 2 | 0 |
| Case 100 | 16 | 66,122,316  | 66,295,260  | 2 | 1 | 3 | 0 |
| Case 100 | 16 | 66,296,559  | 67,426,869  | 1 | 1 | 2 | 0 |
| Case 100 | 16 | 67,432,123  | 67,516,288  | 2 | 1 | 3 | 0 |
| Case 100 | 16 | 67,516,562  | 68,248,607  | 1 | 1 | 2 | 0 |
| Case 100 | 16 | 68,255,187  | 68,343,969  | 2 | 1 | 3 | 0 |
| Case 100 | 16 | 68,344,329  | 70,154,486  | 1 | 1 | 2 | 0 |
| Case 100 | 16 | 70,166,140  | 70,309,237  | 2 | 1 | 3 | 0 |
| Case 100 | 16 | 70,310,438  | 70,833,405  | 1 | 1 | 2 | 0 |
| Case 100 | 16 | 70,841,632  | 71,171,147  | 3 | 1 | 4 | 0 |
| Case 100 | 16 | 71,174,886  | 71,220,668  | 2 | 1 | 3 | 0 |
| Case 100 | 16 | 71,220,702  | 72,090,073  | 1 | 1 | 2 | 0 |
| Case 100 | 16 | 72,094,118  | 72,170,628  | 2 | 1 | 3 | 0 |
| Case 100 | 16 | 72,170,699  | 72,822,574  | 1 | 1 | 2 | 0 |
| Case 100 | 16 | 72,822,645  | 72,879,660  | 2 | 1 | 3 | 0 |
| Case 100 | 16 | 72,880,564  | 79,573,751  | 1 | 1 | 2 | 0 |
| Case 100 | 16 | 79,575,023  | 80,013,110  | 2 | 1 | 3 | 0 |
| Case 100 | 16 | 80,013,367  | 81,953,128  | 1 | 1 | 2 | 0 |
| Case 100 | 16 | 81,953,195  | 82,146,629  | 2 | 1 | 3 | 0 |
| Case 100 | 16 | 82,147,609  | 82,306,551  | 1 | 1 | 2 | 0 |
| Case 100 | 16 | 82,312,278  | 82,445,635  | 2 | 1 | 3 | 0 |
| Case 100 | 16 | 82,447,854  | 84,897,733  | 1 | 1 | 2 | 0 |

|          |    |            |            |   |   |   |   |
|----------|----|------------|------------|---|---|---|---|
| Case 100 | 16 | 84,900,577 | 84,953,351 | 2 | 1 | 3 | 0 |
| Case 100 | 16 | 84,955,551 | 85,531,362 | 1 | 1 | 2 | 0 |
| Case 100 | 16 | 85,536,550 | 85,728,813 | 2 | 1 | 3 | 0 |
| Case 100 | 16 | 85,732,708 | 85,827,080 | 1 | 1 | 2 | 0 |
| Case 100 | 16 | 85,827,099 | 86,084,358 | 2 | 1 | 3 | 0 |
| Case 100 | 16 | 86,085,992 | 86,096,843 | 3 | 0 | 3 | 1 |
| Case 100 | 16 | 86,097,959 | 87,678,302 | 1 | 1 | 2 | 0 |
| Case 100 | 16 | 87,678,420 | 87,854,410 | 2 | 1 | 3 | 0 |
| Case 100 | 16 | 87,856,095 | 87,920,275 | 1 | 1 | 2 | 0 |
| Case 100 | 16 | 87,931,281 | 88,498,529 | 2 | 1 | 3 | 0 |
| Case 100 | 16 | 88,498,884 | 88,633,978 | 1 | 1 | 2 | 0 |
| Case 100 | 16 | 88,637,896 | 88,695,972 | 2 | 1 | 3 | 0 |
| Case 100 | 16 | 88,696,309 | 88,898,407 | 1 | 1 | 2 | 0 |
| Case 100 | 16 | 88,901,632 | 89,167,117 | 2 | 1 | 3 | 0 |
| Case 100 | 16 | 89,167,358 | 89,624,093 | 3 | 0 | 3 | 1 |
| Case 100 | 16 | 89,626,894 | 89,712,981 | 2 | 0 | 2 | 1 |
| Case 100 | 16 | 89,712,997 | 89,737,463 | 3 | 0 | 3 | 1 |
| Case 100 | 16 | 89,741,403 | 89,815,152 | 2 | 0 | 2 | 1 |
| Case 100 | 16 | 89,818,491 | 90,072,265 | 3 | 0 | 3 | 1 |
| Case 100 | 16 | 90,074,001 | 90,095,654 | 2 | 0 | 2 | 1 |
| Case 100 | 16 | 90,095,690 | 90,274,695 | 3 | 0 | 3 | 1 |
| Case 100 | 17 | 11,885     | 1,472,562  | 4 | 0 | 4 | 1 |
| Case 100 | 17 | 1,474,982  | 1,657,653  | 3 | 0 | 3 | 1 |
| Case 100 | 17 | 1,657,720  | 12,868,579 | 4 | 0 | 4 | 1 |
| Case 100 | 17 | 12,868,593 | 13,191,247 | 3 | 0 | 3 | 1 |
| Case 100 | 17 | 13,197,586 | 15,551,871 | 4 | 0 | 4 | 1 |
| Case 100 | 17 | 15,554,505 | 16,384,063 | 3 | 0 | 3 | 1 |
| Case 100 | 17 | 16,384,961 | 18,044,893 | 4 | 0 | 4 | 1 |
| Case 100 | 17 | 18,045,068 | 21,087,988 | 3 | 0 | 3 | 1 |
| Case 100 | 17 | 21,092,156 | 21,267,590 | 4 | 0 | 4 | 1 |
| Case 100 | 17 | 21,268,224 | 22,242,355 | 3 | 0 | 3 | 1 |
| Case 100 | 17 | 25,268,142 | 25,545,321 | 3 | 0 | 3 | 1 |
| Case 100 | 17 | 25,551,682 | 27,882,058 | 4 | 0 | 4 | 1 |
| Case 100 | 17 | 27,889,578 | 28,475,379 | 3 | 0 | 3 | 1 |
| Case 100 | 17 | 28,476,458 | 73,510,694 | 4 | 0 | 4 | 1 |
| Case 100 | 17 | 73,511,073 | 73,616,864 | 3 | 0 | 3 | 1 |
| Case 100 | 17 | 73,616,920 | 77,172,574 | 4 | 0 | 4 | 1 |
| Case 100 | 17 | 77,176,351 | 77,674,058 | 5 | 0 | 5 | 1 |
| Case 100 | 17 | 77,686,881 | 81,060,040 | 4 | 0 | 4 | 1 |
| Case 100 | 18 | 87,505     | 658,001    | 3 | 2 | 5 | 0 |
| Case 100 | 18 | 658,024    | 694,268    | 2 | 2 | 4 | 0 |
| Case 100 | 18 | 706,478    | 2,537,589  | 3 | 2 | 5 | 0 |
| Case 100 | 18 | 2,537,639  | 2,890,768  | 2 | 2 | 4 | 0 |
| Case 100 | 18 | 2,890,796  | 6,926,854  | 3 | 2 | 5 | 0 |
| Case 100 | 18 | 6,928,180  | 7,043,335  | 2 | 2 | 4 | 0 |
| Case 100 | 18 | 7,044,753  | 9,532,097  | 3 | 2 | 5 | 0 |
| Case 100 | 18 | 9,533,855  | 9,542,942  | 2 | 2 | 4 | 0 |
| Case 100 | 18 | 9,545,961  | 11,662,151 | 3 | 2 | 5 | 0 |
| Case 100 | 18 | 11,663,772 | 12,267,156 | 2 | 2 | 4 | 0 |
| Case 100 | 18 | 12,267,865 | 15,375,878 | 3 | 2 | 5 | 0 |
| Case 100 | 18 | 18,520,354 | 18,737,664 | 3 | 2 | 5 | 0 |
| Case 100 | 18 | 18,764,639 | 20,953,686 | 5 | 1 | 6 | 0 |
| Case 100 | 18 | 20,953,720 | 21,530,055 | 5 | 0 | 5 | 1 |
| Case 100 | 18 | 21,530,071 | 21,542,927 | 2 | 2 | 4 | 0 |
| Case 100 | 18 | 21,548,258 | 22,805,073 | 4 | 2 | 6 | 0 |
| Case 100 | 18 | 22,805,229 | 22,805,294 | 3 | 0 | 3 | 1 |
| Case 100 | 18 | 22,805,376 | 23,459,792 | 4 | 1 | 5 | 0 |
| Case 100 | 18 | 23,463,097 | 23,494,445 | 2 | 1 | 3 | 0 |
| Case 100 | 18 | 23,498,988 | 28,858,921 | 1 | 1 | 2 | 0 |
| Case 100 | 18 | 28,869,498 | 28,935,694 | 2 | 1 | 3 | 0 |
| Case 100 | 18 | 28,936,574 | 28,992,822 | 1 | 1 | 2 | 0 |

|          |    |            |            |   |   |   |   |
|----------|----|------------|------------|---|---|---|---|
| Case 100 | 18 | 28,993,073 | 29,055,705 | 2 | 1 | 3 | 0 |
| Case 100 | 18 | 29,055,957 | 29,122,267 | 1 | 1 | 2 | 0 |
| Case 100 | 18 | 29,122,565 | 29,161,836 | 2 | 1 | 3 | 0 |
| Case 100 | 18 | 29,167,091 | 29,796,406 | 1 | 1 | 2 | 0 |
| Case 100 | 18 | 29,797,043 | 29,919,836 | 2 | 1 | 3 | 0 |
| Case 100 | 18 | 29,920,430 | 31,316,169 | 1 | 1 | 2 | 0 |
| Case 100 | 18 | 31,316,708 | 31,326,415 | 2 | 1 | 3 | 0 |
| Case 100 | 18 | 31,327,296 | 32,175,025 | 1 | 1 | 2 | 0 |
| Case 100 | 18 | 32,184,676 | 32,518,790 | 2 | 1 | 3 | 0 |
| Case 100 | 18 | 32,519,272 | 34,122,410 | 1 | 1 | 2 | 0 |
| Case 100 | 18 | 34,126,815 | 34,860,858 | 2 | 1 | 3 | 0 |
| Case 100 | 18 | 34,868,736 | 34,909,342 | 1 | 1 | 2 | 0 |
| Case 100 | 18 | 34,914,746 | 35,103,667 | 2 | 1 | 3 | 0 |
| Case 100 | 18 | 35,108,346 | 35,221,630 | 1 | 1 | 2 | 0 |
| Case 100 | 18 | 35,234,040 | 35,578,714 | 2 | 1 | 3 | 0 |
| Case 100 | 18 | 35,584,240 | 35,888,264 | 1 | 1 | 2 | 0 |
| Case 100 | 18 | 35,891,422 | 36,317,382 | 2 | 1 | 3 | 0 |
| Case 100 | 18 | 36,330,396 | 39,039,213 | 1 | 1 | 2 | 0 |
| Case 100 | 18 | 39,041,852 | 39,194,705 | 2 | 1 | 3 | 0 |
| Case 100 | 18 | 39,198,804 | 39,926,578 | 1 | 1 | 2 | 0 |
| Case 100 | 18 | 39,927,367 | 40,326,865 | 2 | 1 | 3 | 0 |
| Case 100 | 18 | 40,330,297 | 42,530,062 | 1 | 1 | 2 | 0 |
| Case 100 | 18 | 42,530,507 | 42,938,454 | 2 | 1 | 3 | 0 |
| Case 100 | 18 | 42,941,250 | 43,223,105 | 1 | 1 | 2 | 0 |
| Case 100 | 18 | 43,224,101 | 43,329,310 | 2 | 1 | 3 | 0 |
| Case 100 | 18 | 43,329,719 | 44,026,234 | 1 | 1 | 2 | 0 |
| Case 100 | 18 | 44,027,628 | 44,275,622 | 2 | 1 | 3 | 0 |
| Case 100 | 18 | 44,278,985 | 44,541,614 | 1 | 1 | 2 | 0 |
| Case 100 | 18 | 44,541,915 | 44,828,605 | 2 | 1 | 3 | 0 |
| Case 100 | 18 | 44,829,782 | 45,074,057 | 1 | 1 | 2 | 0 |
| Case 100 | 18 | 45,078,345 | 45,620,052 | 2 | 1 | 3 | 0 |
| Case 100 | 18 | 45,621,225 | 45,874,561 | 1 | 1 | 2 | 0 |
| Case 100 | 18 | 45,875,660 | 46,146,221 | 2 | 1 | 3 | 0 |
| Case 100 | 18 | 46,150,975 | 46,276,149 | 1 | 1 | 2 | 0 |
| Case 100 | 18 | 46,277,226 | 46,472,676 | 2 | 1 | 3 | 0 |
| Case 100 | 18 | 46,474,746 | 47,270,975 | 1 | 1 | 2 | 0 |
| Case 100 | 18 | 47,271,009 | 47,811,305 | 2 | 1 | 3 | 0 |
| Case 100 | 18 | 47,811,374 | 49,853,145 | 1 | 1 | 2 | 0 |
| Case 100 | 18 | 49,853,285 | 50,038,122 | 2 | 1 | 3 | 0 |
| Case 100 | 18 | 50,039,676 | 51,850,518 | 1 | 1 | 2 | 0 |
| Case 100 | 18 | 51,851,090 | 52,047,714 | 2 | 1 | 3 | 0 |
| Case 100 | 18 | 52,058,435 | 54,248,623 | 1 | 1 | 2 | 0 |
| Case 100 | 18 | 54,264,534 | 54,746,518 | 2 | 1 | 3 | 0 |
| Case 100 | 18 | 54,747,855 | 54,864,346 | 1 | 1 | 2 | 0 |
| Case 100 | 18 | 54,868,656 | 55,116,804 | 2 | 1 | 3 | 0 |
| Case 100 | 18 | 55,118,992 | 55,838,958 | 1 | 1 | 2 | 0 |
| Case 100 | 18 | 55,839,162 | 56,204,294 | 2 | 1 | 3 | 0 |
| Case 100 | 18 | 56,204,489 | 56,240,030 | 1 | 1 | 2 | 0 |
| Case 100 | 18 | 56,246,389 | 56,297,220 | 2 | 1 | 3 | 0 |
| Case 100 | 18 | 56,301,610 | 56,966,182 | 1 | 1 | 2 | 0 |
| Case 100 | 18 | 56,967,239 | 57,061,983 | 2 | 1 | 3 | 0 |
| Case 100 | 18 | 57,062,098 | 58,038,332 | 1 | 1 | 2 | 0 |
| Case 100 | 18 | 58,038,777 | 58,055,105 | 2 | 1 | 3 | 0 |
| Case 100 | 18 | 58,059,544 | 61,176,266 | 1 | 1 | 2 | 0 |
| Case 100 | 18 | 61,177,912 | 61,262,367 | 2 | 1 | 3 | 0 |
| Case 100 | 18 | 61,264,298 | 61,388,143 | 1 | 1 | 2 | 0 |
| Case 100 | 18 | 61,389,943 | 61,418,880 | 2 | 1 | 3 | 0 |
| Case 100 | 18 | 61,425,379 | 72,090,089 | 1 | 1 | 2 | 0 |
| Case 100 | 18 | 72,096,152 | 73,773,096 | 2 | 1 | 3 | 0 |
| Case 100 | 18 | 73,775,477 | 74,028,404 | 1 | 1 | 2 | 0 |
| Case 100 | 18 | 74,029,649 | 74,153,287 | 2 | 1 | 3 | 0 |

|          |    |            |            |   |   |   |   |
|----------|----|------------|------------|---|---|---|---|
| Case 100 | 18 | 74,153,699 | 74,680,369 | 1 | 1 | 2 | 0 |
| Case 100 | 18 | 74,681,192 | 74,755,155 | 2 | 1 | 3 | 0 |
| Case 100 | 18 | 74,757,938 | 75,100,004 | 1 | 1 | 2 | 0 |
| Case 100 | 18 | 75,100,282 | 75,215,111 | 2 | 1 | 3 | 0 |
| Case 100 | 18 | 75,216,579 | 76,066,845 | 1 | 1 | 2 | 0 |
| Case 100 | 18 | 76,077,920 | 76,118,216 | 2 | 0 | 2 | 1 |
| Case 100 | 18 | 76,121,555 | 76,607,535 | 1 | 1 | 2 | 0 |
| Case 100 | 18 | 76,614,804 | 76,637,364 | 2 | 1 | 3 | 0 |
| Case 100 | 18 | 76,642,967 | 77,129,563 | 1 | 1 | 2 | 0 |
| Case 100 | 18 | 77,133,899 | 78,015,180 | 2 | 1 | 3 | 0 |
| Case 100 | 19 | 260,912    | 4,445,156  | 3 | 0 | 3 | 1 |
| Case 100 | 19 | 4,445,541  | 4,511,601  | 2 | 0 | 2 | 1 |
| Case 100 | 19 | 4,511,612  | 15,165,980 | 3 | 0 | 3 | 1 |
| Case 100 | 19 | 15,166,067 | 15,198,804 | 4 | 0 | 4 | 1 |
| Case 100 | 19 | 15,203,866 | 20,925,934 | 3 | 0 | 3 | 1 |
| Case 100 | 19 | 20,942,429 | 21,579,718 | 2 | 0 | 2 | 1 |
| Case 100 | 19 | 21,586,236 | 24,629,285 | 3 | 0 | 3 | 1 |
| Case 100 | 19 | 27,732,159 | 28,028,663 | 3 | 0 | 3 | 1 |
| Case 100 | 19 | 28,036,744 | 37,028,543 | 3 | 1 | 4 | 0 |
| Case 100 | 19 | 37,034,582 | 37,407,214 | 2 | 1 | 3 | 0 |
| Case 100 | 19 | 37,419,442 | 38,004,356 | 3 | 1 | 4 | 0 |
| Case 100 | 19 | 38,022,358 | 38,271,618 | 3 | 0 | 3 | 1 |
| Case 100 | 19 | 38,285,111 | 40,357,393 | 3 | 1 | 4 | 0 |
| Case 100 | 19 | 40,357,398 | 40,541,514 | 3 | 0 | 3 | 1 |
| Case 100 | 19 | 40,541,744 | 40,869,182 | 3 | 1 | 4 | 0 |
| Case 100 | 19 | 40,872,764 | 40,978,643 | 3 | 0 | 3 | 1 |
| Case 100 | 19 | 40,978,869 | 44,556,381 | 3 | 1 | 4 | 0 |
| Case 100 | 19 | 44,562,928 | 44,661,139 | 4 | 0 | 4 | 1 |
| Case 100 | 19 | 44,661,257 | 49,100,152 | 3 | 1 | 4 | 0 |
| Case 100 | 19 | 49,100,153 | 49,188,824 | 3 | 0 | 3 | 1 |
| Case 100 | 19 | 49,189,026 | 53,958,149 | 3 | 1 | 4 | 0 |
| Case 100 | 19 | 53,958,166 | 53,978,691 | 3 | 0 | 3 | 1 |
| Case 100 | 19 | 53,982,712 | 58,378,516 | 3 | 1 | 4 | 0 |
| Case 100 | 19 | 58,379,892 | 58,464,930 | 3 | 0 | 3 | 1 |
| Case 100 | 19 | 58,465,948 | 59,097,160 | 3 | 1 | 4 | 0 |
| Case 100 | 20 | 63,244     | 25,193,986 | 3 | 2 | 5 | 0 |
| Case 100 | 20 | 25,195,018 | 26,293,985 | 2 | 2 | 4 | 0 |
| Case 100 | 20 | 29,425,357 | 29,845,559 | 2 | 2 | 4 | 0 |
| Case 100 | 20 | 29,846,378 | 31,890,201 | 3 | 2 | 5 | 0 |
| Case 100 | 20 | 31,890,752 | 33,589,111 | 2 | 2 | 4 | 0 |
| Case 100 | 20 | 33,589,328 | 34,001,250 | 3 | 2 | 5 | 0 |
| Case 100 | 20 | 34,010,556 | 35,519,475 | 2 | 2 | 4 | 0 |
| Case 100 | 20 | 35,519,946 | 37,499,139 | 3 | 2 | 5 | 0 |
| Case 100 | 20 | 37,508,515 | 37,796,611 | 2 | 2 | 4 | 0 |
| Case 100 | 20 | 37,799,520 | 37,905,431 | 3 | 2 | 5 | 0 |
| Case 100 | 20 | 37,906,360 | 39,128,578 | 3 | 3 | 6 | 0 |
| Case 100 | 20 | 39,131,200 | 39,255,548 | 3 | 2 | 5 | 0 |
| Case 100 | 20 | 39,261,054 | 40,029,749 | 2 | 2 | 4 | 0 |
| Case 100 | 20 | 40,031,293 | 41,025,672 | 3 | 2 | 5 | 0 |
| Case 100 | 20 | 41,025,813 | 41,554,681 | 3 | 3 | 6 | 0 |
| Case 100 | 20 | 41,560,394 | 56,030,664 | 3 | 2 | 5 | 0 |
| Case 100 | 20 | 56,031,962 | 57,023,562 | 3 | 3 | 6 | 0 |
| Case 100 | 20 | 57,024,541 | 58,384,038 | 3 | 2 | 5 | 0 |
| Case 100 | 20 | 58,384,451 | 58,925,972 | 3 | 3 | 6 | 0 |
| Case 100 | 20 | 58,929,927 | 59,952,155 | 3 | 2 | 5 | 0 |
| Case 100 | 20 | 59,954,382 | 60,427,918 | 3 | 3 | 6 | 0 |
| Case 100 | 20 | 60,435,482 | 61,040,502 | 3 | 2 | 5 | 0 |
| Case 100 | 20 | 61,040,951 | 62,168,604 | 6 | 0 | 6 | 1 |
| Case 100 | 20 | 62,168,633 | 62,948,788 | 5 | 0 | 5 | 1 |
| Case 100 | 21 | 10,827,533 | 10,971,337 | 3 | 0 | 3 | 1 |
| Case 100 | 21 | 14,368,320 | 15,181,318 | 3 | 0 | 3 | 1 |

|          |    |             |             |   |   |   |   |
|----------|----|-------------|-------------|---|---|---|---|
| Case 100 | 21 | 15,207,860  | 15,615,220  | 2 | 0 | 2 | 1 |
| Case 100 | 21 | 15,615,500  | 15,746,311  | 3 | 0 | 3 | 1 |
| Case 100 | 21 | 15,746,350  | 27,652,319  | 2 | 0 | 2 | 1 |
| Case 100 | 21 | 27,653,527  | 27,845,313  | 3 | 0 | 3 | 1 |
| Case 100 | 21 | 27,845,535  | 30,613,466  | 2 | 0 | 2 | 1 |
| Case 100 | 21 | 30,613,769  | 31,964,889  | 3 | 0 | 3 | 1 |
| Case 100 | 21 | 31,964,897  | 32,250,952  | 2 | 0 | 2 | 1 |
| Case 100 | 21 | 32,251,674  | 32,701,353  | 3 | 0 | 3 | 1 |
| Case 100 | 21 | 32,703,074  | 33,140,026  | 2 | 0 | 2 | 1 |
| Case 100 | 21 | 33,146,821  | 33,584,340  | 3 | 0 | 3 | 1 |
| Case 100 | 21 | 33,586,111  | 33,949,136  | 2 | 0 | 2 | 1 |
| Case 100 | 21 | 33,949,151  | 34,581,033  | 3 | 0 | 3 | 1 |
| Case 100 | 21 | 34,581,852  | 35,186,357  | 2 | 0 | 2 | 1 |
| Case 100 | 21 | 35,186,743  | 37,408,526  | 3 | 0 | 3 | 1 |
| Case 100 | 21 | 37,408,530  | 37,872,447  | 2 | 0 | 2 | 1 |
| Case 100 | 21 | 37,874,491  | 40,553,845  | 3 | 0 | 3 | 1 |
| Case 100 | 21 | 40,555,274  | 40,909,706  | 2 | 0 | 2 | 1 |
| Case 100 | 21 | 40,913,560  | 41,566,588  | 3 | 0 | 3 | 1 |
| Case 100 | 21 | 41,566,809  | 41,667,233  | 2 | 0 | 2 | 1 |
| Case 100 | 21 | 41,668,074  | 44,198,143  | 3 | 0 | 3 | 1 |
| Case 100 | 21 | 44,200,858  | 44,276,387  | 2 | 0 | 2 | 1 |
| Case 100 | 21 | 44,277,414  | 44,835,508  | 3 | 0 | 3 | 1 |
| Case 100 | 21 | 44,836,747  | 44,840,296  | 2 | 0 | 2 | 1 |
| Case 100 | 21 | 44,845,968  | 45,810,817  | 3 | 0 | 3 | 1 |
| Case 100 | 21 | 45,811,343  | 45,864,012  | 2 | 0 | 2 | 1 |
| Case 100 | 21 | 45,867,411  | 46,876,044  | 3 | 0 | 3 | 1 |
| Case 100 | 21 | 46,876,045  | 46,960,281  | 2 | 0 | 2 | 1 |
| Case 100 | 21 | 46,964,378  | 47,501,261  | 3 | 0 | 3 | 1 |
| Case 100 | 21 | 47,501,726  | 47,642,626  | 2 | 0 | 2 | 1 |
| Case 100 | 21 | 47,648,436  | 47,786,950  | 3 | 0 | 3 | 1 |
| Case 100 | 21 | 47,787,002  | 47,957,332  | 2 | 0 | 2 | 1 |
| Case 100 | 21 | 47,958,399  | 48,100,155  | 3 | 0 | 3 | 1 |
| Case 100 | 22 | 16,114,244  | 27,143,245  | 3 | 0 | 3 | 1 |
| Case 100 | 22 | 27,143,319  | 27,983,422  | 4 | 0 | 4 | 1 |
| Case 100 | 22 | 27,985,660  | 46,616,117  | 3 | 0 | 3 | 1 |
| Case 100 | 22 | 46,620,416  | 46,657,895  | 4 | 0 | 4 | 1 |
| Case 100 | 22 | 46,658,232  | 47,200,891  | 3 | 0 | 3 | 1 |
| Case 100 | 22 | 47,208,945  | 47,790,072  | 4 | 0 | 4 | 1 |
| Case 100 | 22 | 47,797,442  | 48,720,292  | 3 | 0 | 3 | 1 |
| Case 100 | 22 | 48,722,383  | 49,069,015  | 4 | 0 | 4 | 1 |
| Case 100 | 22 | 49,069,693  | 49,750,715  | 3 | 0 | 3 | 1 |
| Case 100 | 22 | 49,751,323  | 50,169,346  | 4 | 0 | 4 | 1 |
| Case 100 | 22 | 50,169,762  | 51,065,593  | 3 | 0 | 3 | 1 |
| Case 100 | 22 | 51,066,194  | 51,195,728  | 4 | 0 | 4 | 1 |
| Case 101 | 1  | 82,154      | 1,005,806   | 1 | 1 | 2 | 0 |
| Case 101 | 1  | 1,017,197   | 1,087,683   | 1 | 0 | 1 | 0 |
| Case 101 | 1  | 1,089,699   | 121,346,616 | 1 | 1 | 2 | 0 |
| Case 101 | 1  | 142,649,718 | 249,218,992 | 1 | 1 | 2 | 0 |
| Case 101 | 2  | 18,674      | 92,081,640  | 1 | 1 | 2 | 0 |
| Case 101 | 2  | 95,429,424  | 234,847,750 | 1 | 1 | 2 | 0 |
| Case 101 | 2  | 234,847,790 | 236,212,448 | 1 | 0 | 1 | 0 |
| Case 101 | 2  | 236,214,007 | 243,048,760 | 1 | 1 | 2 | 0 |
| Case 101 | 3  | 61,495      | 60,008,221  | 1 | 1 | 2 | 0 |
| Case 101 | 3  | 60,009,128  | 60,040,105  | 1 | 0 | 1 | 0 |
| Case 101 | 3  | 60,047,076  | 60,441,079  | 1 | 1 | 2 | 0 |
| Case 101 | 3  | 60,445,253  | 60,735,438  | 1 | 0 | 1 | 0 |
| Case 101 | 3  | 60,737,133  | 90,442,925  | 1 | 1 | 2 | 0 |
| Case 101 | 3  | 93,537,290  | 168,496,750 | 1 | 1 | 2 | 0 |
| Case 101 | 3  | 168,520,843 | 168,889,604 | 7 | 0 | 7 | 1 |
| Case 101 | 3  | 168,903,973 | 169,908,121 | 1 | 1 | 2 | 0 |
| Case 101 | 3  | 169,918,311 | 170,417,673 | 7 | 0 | 7 | 1 |

|          |    |             |             |   |   |   |   |
|----------|----|-------------|-------------|---|---|---|---|
| Case 101 | 3  | 170,438,978 | 197,838,262 | 1 | 1 | 2 | 0 |
| Case 101 | 4  | 71,566      | 49,620,898  | 1 | 1 | 2 | 0 |
| Case 101 | 4  | 52,697,856  | 141,633,234 | 1 | 1 | 2 | 0 |
| Case 101 | 4  | 141,637,275 | 141,652,922 | 1 | 0 | 1 | 0 |
| Case 101 | 4  | 141,656,467 | 142,053,488 | 1 | 1 | 2 | 0 |
| Case 101 | 4  | 142,053,625 | 142,074,259 | 1 | 0 | 1 | 0 |
| Case 101 | 4  | 142,081,109 | 161,856,343 | 1 | 1 | 2 | 0 |
| Case 101 | 4  | 161,861,640 | 161,935,342 | 4 | 0 | 4 | 1 |
| Case 101 | 4  | 161,936,611 | 190,963,766 | 1 | 1 | 2 | 0 |
| Case 101 | 5  | 38,139      | 4,175,312   | 1 | 1 | 2 | 0 |
| Case 101 | 5  | 4,176,833   | 4,734,171   | 1 | 0 | 1 | 0 |
| Case 101 | 5  | 4,738,222   | 46,399,093  | 1 | 1 | 2 | 0 |
| Case 101 | 5  | 49,457,282  | 180,693,127 | 1 | 1 | 2 | 0 |
| Case 101 | 6  | 108,666     | 58,752,089  | 1 | 1 | 2 | 0 |
| Case 101 | 6  | 61,891,118  | 137,101,726 | 1 | 1 | 2 | 0 |
| Case 101 | 6  | 137,108,757 | 151,617,378 | 1 | 0 | 1 | 0 |
| Case 101 | 6  | 151,618,235 | 151,674,270 | 2 | 0 | 2 | 1 |
| Case 101 | 6  | 151,674,326 | 170,980,171 | 1 | 0 | 1 | 0 |
| Case 101 | 7  | 44,935      | 58,019,061  | 2 | 0 | 2 | 1 |
| Case 101 | 7  | 61,056,053  | 149,503,088 | 2 | 0 | 2 | 1 |
| Case 101 | 7  | 149,503,094 | 149,522,165 | 1 | 0 | 1 | 0 |
| Case 101 | 7  | 149,522,366 | 153,992,610 | 2 | 0 | 2 | 1 |
| Case 101 | 7  | 154,001,207 | 154,462,071 | 1 | 0 | 1 | 0 |
| Case 101 | 7  | 154,466,191 | 159,119,486 | 2 | 0 | 2 | 1 |
| Case 101 | 8  | 164,984     | 43,791,691  | 2 | 1 | 3 | 0 |
| Case 101 | 8  | 46,886,735  | 48,697,675  | 2 | 1 | 3 | 0 |
| Case 101 | 8  | 48,697,705  | 59,058,842  | 3 | 1 | 4 | 0 |
| Case 101 | 8  | 59,059,166  | 59,244,395  | 3 | 0 | 3 | 1 |
| Case 101 | 8  | 59,249,026  | 60,600,281  | 4 | 1 | 5 | 0 |
| Case 101 | 8  | 60,604,193  | 60,649,504  | 2 | 1 | 3 | 0 |
| Case 101 | 8  | 60,656,194  | 113,647,451 | 3 | 1 | 4 | 0 |
| Case 101 | 8  | 113,649,078 | 113,662,524 | 3 | 0 | 3 | 1 |
| Case 101 | 8  | 113,662,583 | 114,417,130 | 4 | 1 | 5 | 0 |
| Case 101 | 8  | 114,440,178 | 114,676,890 | 2 | 1 | 3 | 0 |
| Case 101 | 8  | 114,677,121 | 144,801,681 | 3 | 1 | 4 | 0 |
| Case 101 | 8  | 144,802,456 | 145,746,384 | 3 | 0 | 3 | 1 |
| Case 101 | 8  | 145,746,552 | 146,293,414 | 3 | 1 | 4 | 0 |
| Case 101 | 9  | 46,587      | 224,227     | 1 | 0 | 1 | 0 |
| Case 101 | 9  | 227,980     | 9,263,980   | 1 | 1 | 2 | 0 |
| Case 101 | 9  | 9,264,439   | 9,530,755   | 1 | 0 | 1 | 0 |
| Case 101 | 9  | 9,533,062   | 46,944,322  | 1 | 1 | 2 | 0 |
| Case 101 | 9  | 65,629,772  | 140,173,637 | 1 | 1 | 2 | 0 |
| Case 101 | 9  | 140,174,272 | 140,267,982 | 1 | 0 | 1 | 0 |
| Case 101 | 9  | 140,268,976 | 141,066,491 | 1 | 1 | 2 | 0 |
| Case 101 | 10 | 98,087      | 39,097,912  | 1 | 1 | 2 | 0 |
| Case 101 | 10 | 42,436,301  | 135,477,883 | 1 | 1 | 2 | 0 |
| Case 101 | 11 | 193,146     | 50,332,064  | 1 | 1 | 2 | 0 |
| Case 101 | 11 | 50,345,390  | 51,095,992  | 1 | 0 | 1 | 0 |
| Case 101 | 11 | 51,160,828  | 51,591,253  | 3 | 1 | 4 | 0 |
| Case 101 | 11 | 54,794,237  | 55,027,673  | 1 | 0 | 1 | 0 |
| Case 101 | 11 | 55,028,549  | 134,934,063 | 1 | 1 | 2 | 0 |
| Case 101 | 12 | 191,619     | 34,853,011  | 1 | 1 | 2 | 0 |
| Case 101 | 12 | 37,876,400  | 133,810,935 | 1 | 1 | 2 | 0 |
| Case 101 | 13 | 19,058,717  | 115,103,529 | 2 | 1 | 3 | 0 |
| Case 101 | 14 | 19,280,733  | 20,404,614  | 2 | 0 | 2 | 1 |
| Case 101 | 14 | 20,404,671  | 47,169,434  | 1 | 1 | 2 | 0 |
| Case 101 | 14 | 47,173,911  | 75,506,621  | 1 | 0 | 1 | 0 |
| Case 101 | 14 | 75,506,696  | 75,545,685  | 1 | 1 | 2 | 0 |
| Case 101 | 14 | 75,546,230  | 82,489,254  | 1 | 0 | 1 | 0 |
| Case 101 | 14 | 82,505,045  | 107,287,663 | 1 | 1 | 2 | 0 |
| Case 101 | 15 | 20,034,919  | 102,461,162 | 1 | 1 | 2 | 0 |

|          |    |            |            |   |   |   |   |
|----------|----|------------|------------|---|---|---|---|
| Case 101 | 16 | 88,165     | 35,285,582 | 1 | 1 | 2 | 0 |
| Case 101 | 16 | 46,450,037 | 90,274,695 | 1 | 1 | 2 | 0 |
| Case 101 | 17 | 11,885     | 649,232    | 1 | 0 | 1 | 0 |
| Case 101 | 17 | 649,239    | 727,132    | 2 | 0 | 2 | 1 |
| Case 101 | 17 | 728,030    | 7,320,870  | 1 | 0 | 1 | 0 |
| Case 101 | 17 | 7,321,858  | 7,445,372  | 2 | 0 | 2 | 1 |
| Case 101 | 17 | 7,448,198  | 22,242,355 | 1 | 0 | 1 | 0 |
| Case 101 | 17 | 25,268,142 | 25,350,029 | 1 | 0 | 1 | 0 |
| Case 101 | 17 | 25,366,428 | 26,676,183 | 3 | 1 | 4 | 0 |
| Case 101 | 17 | 26,680,014 | 27,308,971 | 2 | 1 | 3 | 0 |
| Case 101 | 17 | 27,309,034 | 27,395,890 | 3 | 1 | 4 | 0 |
| Case 101 | 17 | 27,400,983 | 28,120,918 | 3 | 0 | 3 | 1 |
| Case 101 | 17 | 28,130,784 | 28,296,169 | 4 | 1 | 5 | 0 |
| Case 101 | 17 | 28,296,327 | 29,086,657 | 2 | 1 | 3 | 0 |
| Case 101 | 17 | 29,107,708 | 29,619,880 | 3 | 1 | 4 | 0 |
| Case 101 | 17 | 29,622,128 | 29,685,632 | 1 | 0 | 1 | 0 |
| Case 101 | 17 | 29,697,251 | 29,936,995 | 3 | 1 | 4 | 0 |
| Case 101 | 17 | 29,939,376 | 30,216,366 | 3 | 0 | 3 | 1 |
| Case 101 | 17 | 30,216,384 | 30,331,751 | 3 | 1 | 4 | 0 |
| Case 101 | 17 | 30,343,146 | 30,468,566 | 1 | 0 | 1 | 0 |
| Case 101 | 17 | 30,475,431 | 30,497,949 | 1 | 1 | 2 | 0 |
| Case 101 | 17 | 30,511,274 | 30,752,964 | 7 | 0 | 7 | 1 |
| Case 101 | 17 | 30,782,356 | 30,821,833 | 1 | 1 | 2 | 0 |
| Case 101 | 17 | 30,827,688 | 30,841,962 | 7 | 0 | 7 | 1 |
| Case 101 | 17 | 30,858,969 | 30,861,865 | 1 | 1 | 2 | 0 |
| Case 101 | 17 | 30,863,752 | 31,491,507 | 1 | 0 | 1 | 0 |
| Case 101 | 17 | 31,491,925 | 31,501,913 | 1 | 1 | 2 | 0 |
| Case 101 | 17 | 31,503,995 | 31,539,581 | 7 | 0 | 7 | 1 |
| Case 101 | 17 | 31,552,697 | 31,552,697 | 1 | 1 | 2 | 0 |
| Case 101 | 17 | 31,565,033 | 32,639,361 | 1 | 0 | 1 | 0 |
| Case 101 | 17 | 32,639,369 | 32,641,930 | 2 | 1 | 3 | 0 |
| Case 101 | 17 | 32,643,849 | 32,675,472 | 4 | 1 | 5 | 0 |
| Case 101 | 17 | 32,677,709 | 32,701,463 | 1 | 0 | 1 | 0 |
| Case 101 | 17 | 32,705,679 | 32,714,558 | 3 | 1 | 4 | 0 |
| Case 101 | 17 | 32,717,213 | 35,831,222 | 1 | 0 | 1 | 0 |
| Case 101 | 17 | 35,836,990 | 37,047,658 | 1 | 1 | 2 | 0 |
| Case 101 | 17 | 37,049,116 | 37,049,116 | 1 | 0 | 1 | 0 |
| Case 101 | 17 | 37,052,131 | 37,052,131 | 4 | 1 | 5 | 0 |
| Case 101 | 17 | 37,054,772 | 37,815,305 | 2 | 1 | 3 | 0 |
| Case 101 | 17 | 37,816,461 | 37,892,370 | 6 | 1 | 7 | 0 |
| Case 101 | 17 | 37,894,463 | 37,894,463 | 1 | 0 | 1 | 0 |
| Case 101 | 17 | 37,898,705 | 38,040,763 | 3 | 1 | 4 | 0 |
| Case 101 | 17 | 38,049,233 | 38,173,123 | 3 | 0 | 3 | 1 |
| Case 101 | 17 | 38,173,143 | 38,257,090 | 3 | 1 | 4 | 0 |
| Case 101 | 17 | 38,264,197 | 38,282,536 | 1 | 0 | 1 | 0 |
| Case 101 | 17 | 38,283,199 | 39,296,135 | 1 | 1 | 2 | 0 |
| Case 101 | 17 | 39,304,357 | 43,928,667 | 1 | 0 | 1 | 0 |
| Case 101 | 17 | 43,929,696 | 44,248,903 | 2 | 0 | 2 | 1 |
| Case 101 | 17 | 44,249,033 | 48,208,455 | 1 | 0 | 1 | 0 |
| Case 101 | 17 | 48,214,134 | 48,257,099 | 1 | 1 | 2 | 0 |
| Case 101 | 17 | 48,260,630 | 57,786,853 | 1 | 0 | 1 | 0 |
| Case 101 | 17 | 57,800,358 | 58,523,761 | 3 | 1 | 4 | 0 |
| Case 101 | 17 | 58,525,018 | 59,154,018 | 3 | 0 | 3 | 1 |
| Case 101 | 17 | 59,158,243 | 59,885,856 | 3 | 1 | 4 | 0 |
| Case 101 | 17 | 59,885,956 | 60,225,452 | 1 | 1 | 2 | 0 |
| Case 101 | 17 | 60,227,004 | 61,869,806 | 1 | 0 | 1 | 0 |
| Case 101 | 17 | 61,875,398 | 61,902,667 | 1 | 1 | 2 | 0 |
| Case 101 | 17 | 61,902,772 | 62,476,451 | 1 | 0 | 1 | 0 |
| Case 101 | 17 | 62,479,069 | 62,582,265 | 1 | 1 | 2 | 0 |
| Case 101 | 17 | 62,583,599 | 65,182,445 | 1 | 0 | 1 | 0 |
| Case 101 | 17 | 65,185,800 | 66,678,300 | 3 | 1 | 4 | 0 |



|          |    |             |             |   |   |   |   |
|----------|----|-------------|-------------|---|---|---|---|
| Case 101 | 17 | 66,683,179  | 66,881,456  | 1 | 0 | 1 | 0 |
| Case 101 | 17 | 66,883,204  | 66,891,131  | 3 | 1 | 4 | 0 |
| Case 101 | 17 | 66,898,257  | 70,432,577  | 1 | 0 | 1 | 0 |
| Case 101 | 17 | 70,434,208  | 70,645,012  | 2 | 0 | 2 | 1 |
| Case 101 | 17 | 70,645,032  | 79,450,600  | 1 | 0 | 1 | 0 |
| Case 101 | 17 | 79,459,399  | 81,060,040  | 2 | 0 | 2 | 1 |
| Case 101 | 18 | 87,505      | 15,375,878  | 1 | 1 | 2 | 0 |
| Case 101 | 18 | 18,520,354  | 66,744,308  | 1 | 1 | 2 | 0 |
| Case 101 | 18 | 66,747,568  | 66,758,232  | 1 | 0 | 1 | 0 |
| Case 101 | 18 | 66,758,828  | 78,015,180  | 1 | 1 | 2 | 0 |
| Case 101 | 19 | 260,912     | 24,629,285  | 1 | 1 | 2 | 0 |
| Case 101 | 19 | 27,732,159  | 59,097,160  | 1 | 1 | 2 | 0 |
| Case 101 | 20 | 63,244      | 26,293,985  | 2 | 1 | 3 | 0 |
| Case 101 | 20 | 29,425,357  | 62,948,788  | 2 | 1 | 3 | 0 |
| Case 101 | 21 | 10,827,533  | 10,971,337  | 1 | 1 | 2 | 0 |
| Case 101 | 21 | 14,368,320  | 48,100,155  | 1 | 1 | 2 | 0 |
| Case 101 | 22 | 16,114,244  | 51,195,728  | 1 | 1 | 2 | 0 |
| Case 103 | 1  | 82,154      | 120,381,919 | 3 | 0 | 3 | 1 |
| Case 103 | 1  | 120,384,066 | 121,346,616 | 4 | 0 | 4 | 1 |
| Case 103 | 1  | 142,649,718 | 152,184,950 | 4 | 0 | 4 | 1 |
| Case 103 | 1  | 152,185,628 | 152,329,055 | 3 | 0 | 3 | 1 |
| Case 103 | 1  | 152,329,256 | 227,819,514 | 4 | 0 | 4 | 1 |
| Case 103 | 1  | 227,821,255 | 228,566,387 | 3 | 0 | 3 | 1 |
| Case 103 | 1  | 228,568,159 | 249,218,992 | 4 | 0 | 4 | 1 |
| Case 103 | 2  | 18,674      | 92,081,640  | 2 | 1 | 3 | 0 |
| Case 103 | 2  | 95,429,424  | 205,631,567 | 2 | 1 | 3 | 0 |
| Case 103 | 2  | 205,636,870 | 206,185,567 | 2 | 0 | 2 | 1 |
| Case 103 | 2  | 206,188,122 | 243,048,760 | 2 | 1 | 3 | 0 |
| Case 103 | 3  | 61,495      | 3,960,052   | 2 | 1 | 3 | 0 |
| Case 103 | 3  | 3,965,271   | 4,035,443   | 0 | 0 | 0 | 0 |
| Case 103 | 3  | 4,041,589   | 60,306,891  | 2 | 1 | 3 | 0 |
| Case 103 | 3  | 60,310,376  | 60,445,253  | 1 | 0 | 1 | 0 |
| Case 103 | 3  | 60,447,369  | 90,442,925  | 2 | 1 | 3 | 0 |
| Case 103 | 3  | 93,537,290  | 122,287,808 | 2 | 1 | 3 | 0 |
| Case 103 | 3  | 122,288,145 | 122,640,541 | 3 | 0 | 3 | 1 |
| Case 103 | 3  | 122,640,948 | 197,838,262 | 2 | 1 | 3 | 0 |
| Case 103 | 4  | 71,566      | 49,620,898  | 1 | 1 | 2 | 0 |
| Case 103 | 4  | 52,697,856  | 91,831,513  | 1 | 1 | 2 | 0 |
| Case 103 | 4  | 91,847,796  | 91,957,343  | 1 | 0 | 1 | 0 |
| Case 103 | 4  | 91,959,750  | 92,357,499  | 1 | 1 | 2 | 0 |
| Case 103 | 4  | 92,358,383  | 92,803,775  | 2 | 1 | 3 | 0 |
| Case 103 | 4  | 92,816,815  | 177,974,062 | 1 | 1 | 2 | 0 |
| Case 103 | 4  | 177,974,857 | 178,776,502 | 1 | 0 | 1 | 0 |
| Case 103 | 4  | 178,791,367 | 190,763,591 | 1 | 1 | 2 | 0 |
| Case 103 | 4  | 190,764,527 | 190,963,766 | 3 | 0 | 3 | 1 |
| Case 103 | 5  | 38,139      | 730,271     | 3 | 1 | 4 | 0 |
| Case 103 | 5  | 788,646     | 850,518     | 1 | 1 | 2 | 0 |
| Case 103 | 5  | 850,668     | 46,399,093  | 3 | 1 | 4 | 0 |
| Case 103 | 5  | 49,457,282  | 139,909,036 | 1 | 1 | 2 | 0 |
| Case 103 | 5  | 139,909,066 | 139,931,384 | 2 | 1 | 3 | 0 |
| Case 103 | 5  | 139,931,607 | 139,936,823 | 0 | 0 | 0 | 0 |
| Case 103 | 5  | 139,936,825 | 139,987,897 | 2 | 1 | 3 | 0 |
| Case 103 | 5  | 140,005,110 | 140,563,377 | 1 | 1 | 2 | 0 |
| Case 103 | 5  | 140,566,244 | 140,857,798 | 2 | 1 | 3 | 0 |
| Case 103 | 5  | 140,857,866 | 180,693,127 | 1 | 1 | 2 | 0 |
| Case 103 | 6  | 108,666     | 30,736,151  | 2 | 1 | 3 | 0 |
| Case 103 | 6  | 30,736,541  | 30,900,150  | 3 | 0 | 3 | 1 |
| Case 103 | 6  | 30,900,234  | 30,994,470  | 2 | 1 | 3 | 0 |
| Case 103 | 6  | 30,994,635  | 31,318,144  | 3 | 0 | 3 | 1 |
| Case 103 | 6  | 31,318,177  | 31,337,633  | 2 | 1 | 3 | 0 |
| Case 103 | 6  | 31,338,528  | 31,341,357  | 0 | 0 | 0 | 0 |

|          |   |             |             |   |   |   |   |
|----------|---|-------------|-------------|---|---|---|---|
| Case 103 | 6 | 31,342,484  | 46,786,183  | 2 | 1 | 3 | 0 |
| Case 103 | 6 | 46,787,394  | 47,591,922  | 3 | 0 | 3 | 1 |
| Case 103 | 6 | 47,594,002  | 58,752,089  | 2 | 1 | 3 | 0 |
| Case 103 | 6 | 61,891,118  | 161,111,113 | 2 | 1 | 3 | 0 |
| Case 103 | 6 | 161,115,245 | 161,348,069 | 3 | 0 | 3 | 1 |
| Case 103 | 6 | 161,349,326 | 162,914,986 | 2 | 1 | 3 | 0 |
| Case 103 | 6 | 162,917,942 | 163,007,394 | 1 | 0 | 1 | 0 |
| Case 103 | 6 | 163,023,054 | 170,980,171 | 2 | 1 | 3 | 0 |
| Case 103 | 7 | 44,935      | 6,901,445   | 3 | 1 | 4 | 0 |
| Case 103 | 7 | 6,929,662   | 13,731,213  | 4 | 1 | 5 | 0 |
| Case 103 | 7 | 13,731,897  | 14,504,188  | 3 | 1 | 4 | 0 |
| Case 103 | 7 | 14,505,694  | 26,954,746  | 4 | 1 | 5 | 0 |
| Case 103 | 7 | 27,026,872  | 28,319,962  | 3 | 1 | 4 | 0 |
| Case 103 | 7 | 28,320,034  | 30,691,986  | 4 | 1 | 5 | 0 |
| Case 103 | 7 | 30,693,081  | 31,137,003  | 3 | 1 | 4 | 0 |
| Case 103 | 7 | 31,141,418  | 32,044,612  | 4 | 1 | 5 | 0 |
| Case 103 | 7 | 32,048,171  | 32,496,930  | 3 | 1 | 4 | 0 |
| Case 103 | 7 | 32,497,039  | 34,887,018  | 4 | 1 | 5 | 0 |
| Case 103 | 7 | 34,887,170  | 36,463,470  | 3 | 1 | 4 | 0 |
| Case 103 | 7 | 36,463,504  | 41,042,665  | 4 | 1 | 5 | 0 |
| Case 103 | 7 | 41,046,432  | 45,932,600  | 3 | 1 | 4 | 0 |
| Case 103 | 7 | 45,932,640  | 47,296,495  | 4 | 1 | 5 | 0 |
| Case 103 | 7 | 47,305,969  | 50,664,922  | 3 | 1 | 4 | 0 |
| Case 103 | 7 | 50,666,033  | 53,015,990  | 4 | 1 | 5 | 0 |
| Case 103 | 7 | 53,016,462  | 53,661,764  | 3 | 1 | 4 | 0 |
| Case 103 | 7 | 53,662,131  | 56,067,016  | 4 | 1 | 5 | 0 |
| Case 103 | 7 | 56,068,980  | 58,019,061  | 3 | 1 | 4 | 0 |
| Case 103 | 7 | 61,056,053  | 65,617,971  | 3 | 1 | 4 | 0 |
| Case 103 | 7 | 65,618,674  | 71,021,037  | 4 | 1 | 5 | 0 |
| Case 103 | 7 | 71,021,468  | 76,198,932  | 3 | 1 | 4 | 0 |
| Case 103 | 7 | 76,209,459  | 82,579,610  | 4 | 1 | 5 | 0 |
| Case 103 | 7 | 82,579,933  | 82,939,626  | 3 | 1 | 4 | 0 |
| Case 103 | 7 | 82,941,408  | 93,550,447  | 4 | 1 | 5 | 0 |
| Case 103 | 7 | 93,551,428  | 94,055,095  | 3 | 1 | 4 | 0 |
| Case 103 | 7 | 94,056,006  | 97,691,889  | 4 | 1 | 5 | 0 |
| Case 103 | 7 | 97,699,292  | 102,470,275 | 3 | 1 | 4 | 0 |
| Case 103 | 7 | 102,471,345 | 126,748,248 | 4 | 1 | 5 | 0 |
| Case 103 | 7 | 126,748,966 | 129,598,336 | 3 | 1 | 4 | 0 |
| Case 103 | 7 | 129,603,129 | 131,527,098 | 4 | 1 | 5 | 0 |
| Case 103 | 7 | 131,529,852 | 135,873,681 | 3 | 1 | 4 | 0 |
| Case 103 | 7 | 135,874,514 | 138,382,677 | 4 | 1 | 5 | 0 |
| Case 103 | 7 | 138,383,537 | 144,183,744 | 3 | 1 | 4 | 0 |
| Case 103 | 7 | 144,184,387 | 147,879,557 | 4 | 1 | 5 | 0 |
| Case 103 | 7 | 147,881,158 | 150,103,137 | 3 | 1 | 4 | 0 |
| Case 103 | 7 | 150,115,183 | 150,623,137 | 4 | 1 | 5 | 0 |
| Case 103 | 7 | 150,634,448 | 151,575,404 | 3 | 1 | 4 | 0 |
| Case 103 | 7 | 151,576,111 | 154,959,808 | 4 | 1 | 5 | 0 |
| Case 103 | 7 | 154,964,394 | 159,119,486 | 3 | 1 | 4 | 0 |
| Case 103 | 8 | 164,984     | 21,955,043  | 2 | 2 | 4 | 0 |
| Case 103 | 8 | 21,955,598  | 22,137,071  | 2 | 1 | 3 | 0 |
| Case 103 | 8 | 22,137,086  | 43,791,691  | 2 | 2 | 4 | 0 |
| Case 103 | 8 | 46,886,735  | 47,068,342  | 2 | 2 | 4 | 0 |
| Case 103 | 8 | 47,075,668  | 48,236,907  | 2 | 1 | 3 | 0 |
| Case 103 | 8 | 48,240,805  | 142,200,731 | 2 | 2 | 4 | 0 |
| Case 103 | 8 | 142,201,477 | 142,490,120 | 2 | 1 | 3 | 0 |
| Case 103 | 8 | 142,490,166 | 144,387,485 | 2 | 2 | 4 | 0 |
| Case 103 | 8 | 144,387,833 | 145,758,661 | 2 | 1 | 3 | 0 |
| Case 103 | 8 | 145,761,188 | 146,293,414 | 2 | 2 | 4 | 0 |
| Case 103 | 9 | 46,587      | 8,982,620   | 2 | 1 | 3 | 0 |
| Case 103 | 9 | 8,984,469   | 9,328,048   | 1 | 1 | 2 | 0 |
| Case 103 | 9 | 9,337,454   | 9,417,343   | 1 | 0 | 1 | 0 |

|          |    |             |             |   |   |   |   |
|----------|----|-------------|-------------|---|---|---|---|
| Case 103 | 9  | 9,417,430   | 46,944,322  | 2 | 1 | 3 | 0 |
| Case 103 | 9  | 65,629,772  | 140,000,649 | 2 | 1 | 3 | 0 |
| Case 103 | 9  | 140,000,751 | 140,248,802 | 1 | 1 | 2 | 0 |
| Case 103 | 9  | 140,249,041 | 141,066,491 | 2 | 1 | 3 | 0 |
| Case 103 | 10 | 98,087      | 39,097,912  | 1 | 1 | 2 | 0 |
| Case 103 | 10 | 42,436,301  | 42,509,794  | 1 | 1 | 2 | 0 |
| Case 103 | 10 | 42,682,133  | 43,019,233  | 3 | 1 | 4 | 0 |
| Case 103 | 10 | 43,027,839  | 70,332,862  | 1 | 1 | 2 | 0 |
| Case 103 | 10 | 70,332,865  | 70,741,323  | 2 | 1 | 3 | 0 |
| Case 103 | 10 | 70,742,398  | 129,899,938 | 1 | 1 | 2 | 0 |
| Case 103 | 10 | 129,900,858 | 129,961,901 | 2 | 1 | 3 | 0 |
| Case 103 | 10 | 129,962,286 | 135,252,347 | 1 | 1 | 2 | 0 |
| Case 103 | 10 | 135,256,762 | 135,477,883 | 3 | 1 | 4 | 0 |
| Case 103 | 11 | 193,146     | 892,760     | 2 | 0 | 2 | 1 |
| Case 103 | 11 | 898,155     | 1,025,358   | 2 | 1 | 3 | 0 |
| Case 103 | 11 | 1,025,843   | 51,591,253  | 2 | 0 | 2 | 1 |
| Case 103 | 11 | 54,794,237  | 59,132,598  | 2 | 0 | 2 | 1 |
| Case 103 | 11 | 59,132,671  | 60,215,206  | 3 | 0 | 3 | 1 |
| Case 103 | 11 | 60,220,947  | 62,284,797  | 2 | 0 | 2 | 1 |
| Case 103 | 11 | 62,284,845  | 62,300,502  | 2 | 1 | 3 | 0 |
| Case 103 | 11 | 62,300,591  | 66,359,489  | 2 | 0 | 2 | 1 |
| Case 103 | 11 | 66,359,781  | 69,512,978  | 5 | 1 | 6 | 0 |
| Case 103 | 11 | 69,513,338  | 69,544,508  | 2 | 0 | 2 | 1 |
| Case 103 | 11 | 69,549,801  | 70,253,475  | 5 | 1 | 6 | 0 |
| Case 103 | 11 | 70,257,669  | 134,934,063 | 2 | 0 | 2 | 1 |
| Case 103 | 12 | 191,619     | 33,278,996  | 2 | 1 | 3 | 0 |
| Case 103 | 12 | 33,284,446  | 34,853,011  | 3 | 0 | 3 | 1 |
| Case 103 | 12 | 37,876,400  | 39,529,362  | 3 | 0 | 3 | 1 |
| Case 103 | 12 | 39,531,466  | 133,810,935 | 2 | 1 | 3 | 0 |
| Case 103 | 13 | 19,058,717  | 115,103,529 | 2 | 1 | 3 | 0 |
| Case 103 | 14 | 19,280,733  | 21,337,266  | 2 | 2 | 4 | 0 |
| Case 103 | 14 | 21,338,459  | 21,463,040  | 2 | 1 | 3 | 0 |
| Case 103 | 14 | 21,463,041  | 24,120,270  | 2 | 2 | 4 | 0 |
| Case 103 | 14 | 24,122,667  | 24,940,641  | 3 | 0 | 3 | 1 |
| Case 103 | 14 | 24,941,969  | 25,102,160  | 2 | 1 | 3 | 0 |
| Case 103 | 14 | 25,103,409  | 73,577,801  | 2 | 2 | 4 | 0 |
| Case 103 | 14 | 73,581,011  | 73,733,432  | 2 | 1 | 3 | 0 |
| Case 103 | 14 | 73,734,460  | 103,342,015 | 2 | 2 | 4 | 0 |
| Case 103 | 14 | 103,342,049 | 103,628,384 | 2 | 1 | 3 | 0 |
| Case 103 | 14 | 103,628,738 | 104,516,748 | 2 | 2 | 4 | 0 |
| Case 103 | 14 | 104,518,322 | 104,646,326 | 2 | 1 | 3 | 0 |
| Case 103 | 14 | 104,646,717 | 107,287,663 | 2 | 2 | 4 | 0 |
| Case 103 | 15 | 20,034,919  | 42,143,533  | 2 | 1 | 3 | 0 |
| Case 103 | 15 | 42,144,039  | 42,185,151  | 1 | 1 | 2 | 0 |
| Case 103 | 15 | 42,185,157  | 75,949,333  | 2 | 1 | 3 | 0 |
| Case 103 | 15 | 75,949,339  | 76,366,876  | 3 | 0 | 3 | 1 |
| Case 103 | 15 | 76,373,626  | 102,461,162 | 2 | 1 | 3 | 0 |
| Case 103 | 16 | 88,165      | 538,565     | 2 | 1 | 3 | 0 |
| Case 103 | 16 | 538,888     | 847,743     | 1 | 1 | 2 | 0 |
| Case 103 | 16 | 847,871     | 35,285,582  | 2 | 1 | 3 | 0 |
| Case 103 | 16 | 46,450,037  | 90,274,695  | 2 | 1 | 3 | 0 |
| Case 103 | 17 | 11,885      | 22,242,355  | 3 | 0 | 3 | 1 |
| Case 103 | 17 | 25,268,142  | 25,295,032  | 3 | 0 | 3 | 1 |
| Case 103 | 17 | 25,329,949  | 72,739,283  | 2 | 1 | 3 | 0 |
| Case 103 | 17 | 72,739,304  | 77,711,716  | 2 | 0 | 2 | 1 |
| Case 103 | 17 | 77,711,798  | 79,060,247  | 2 | 1 | 3 | 0 |
| Case 103 | 17 | 79,065,650  | 79,516,266  | 1 | 1 | 2 | 0 |
| Case 103 | 17 | 79,516,352  | 81,060,040  | 2 | 1 | 3 | 0 |
| Case 103 | 18 | 87,505      | 15,375,878  | 2 | 1 | 3 | 0 |
| Case 103 | 18 | 18,520,354  | 78,015,180  | 2 | 1 | 3 | 0 |
| Case 103 | 19 | 260,912     | 1,182,415   | 3 | 1 | 4 | 0 |

|          |    |            |            |   |   |   |   |
|----------|----|------------|------------|---|---|---|---|
| Case 103 | 19 | 1,185,924  | 2,097,056  | 2 | 1 | 3 | 0 |
| Case 103 | 19 | 2,097,832  | 3,511,709  | 2 | 2 | 4 | 0 |
| Case 103 | 19 | 3,523,055  | 4,110,492  | 2 | 1 | 3 | 0 |
| Case 103 | 19 | 4,112,988  | 4,432,123  | 2 | 2 | 4 | 0 |
| Case 103 | 19 | 4,432,973  | 4,839,514  | 2 | 1 | 3 | 0 |
| Case 103 | 19 | 4,841,151  | 7,618,660  | 2 | 2 | 4 | 0 |
| Case 103 | 19 | 7,618,859  | 7,707,002  | 2 | 1 | 3 | 0 |
| Case 103 | 19 | 7,707,702  | 7,964,617  | 2 | 2 | 4 | 0 |
| Case 103 | 19 | 7,964,704  | 8,665,979  | 2 | 1 | 3 | 0 |
| Case 103 | 19 | 8,668,121  | 9,676,521  | 2 | 2 | 4 | 0 |
| Case 103 | 19 | 9,677,428  | 10,172,516 | 2 | 1 | 3 | 0 |
| Case 103 | 19 | 10,176,663 | 10,398,430 | 2 | 2 | 4 | 0 |
| Case 103 | 19 | 10,398,439 | 11,217,334 | 2 | 1 | 3 | 0 |
| Case 103 | 19 | 11,217,344 | 13,868,278 | 2 | 2 | 4 | 0 |
| Case 103 | 19 | 13,869,687 | 14,199,924 | 2 | 1 | 3 | 0 |
| Case 103 | 19 | 14,199,987 | 15,271,630 | 2 | 2 | 4 | 0 |
| Case 103 | 19 | 15,271,771 | 15,572,397 | 2 | 1 | 3 | 0 |
| Case 103 | 19 | 15,572,399 | 17,394,228 | 2 | 2 | 4 | 0 |
| Case 103 | 19 | 17,394,237 | 17,534,540 | 2 | 1 | 3 | 0 |
| Case 103 | 19 | 17,534,560 | 17,836,969 | 2 | 2 | 4 | 0 |
| Case 103 | 19 | 17,837,151 | 18,899,986 | 2 | 1 | 3 | 0 |
| Case 103 | 19 | 18,900,101 | 24,629,285 | 2 | 2 | 4 | 0 |
| Case 103 | 19 | 27,732,159 | 33,005,903 | 2 | 2 | 4 | 0 |
| Case 103 | 19 | 33,006,378 | 33,467,466 | 2 | 1 | 3 | 0 |
| Case 103 | 19 | 33,467,515 | 40,263,966 | 2 | 2 | 4 | 0 |
| Case 103 | 19 | 40,265,568 | 41,086,248 | 2 | 1 | 3 | 0 |
| Case 103 | 19 | 41,086,528 | 42,393,286 | 2 | 2 | 4 | 0 |
| Case 103 | 19 | 42,396,761 | 43,243,403 | 2 | 1 | 3 | 0 |
| Case 103 | 19 | 43,262,353 | 45,916,986 | 2 | 2 | 4 | 0 |
| Case 103 | 19 | 45,922,414 | 46,380,610 | 2 | 1 | 3 | 0 |
| Case 103 | 19 | 46,384,459 | 49,102,399 | 2 | 2 | 4 | 0 |
| Case 103 | 19 | 49,102,469 | 49,249,698 | 2 | 1 | 3 | 0 |
| Case 103 | 19 | 49,249,795 | 58,512,098 | 2 | 2 | 4 | 0 |
| Case 103 | 19 | 58,512,227 | 58,609,457 | 2 | 1 | 3 | 0 |
| Case 103 | 19 | 58,610,254 | 58,815,853 | 2 | 2 | 4 | 0 |
| Case 103 | 19 | 58,819,113 | 59,097,160 | 2 | 1 | 3 | 0 |
| Case 103 | 20 | 63,244     | 139,577    | 3 | 1 | 4 | 0 |
| Case 103 | 20 | 139,745    | 1,272,686  | 3 | 2 | 5 | 0 |
| Case 103 | 20 | 1,277,099  | 2,401,231  | 3 | 1 | 4 | 0 |
| Case 103 | 20 | 2,407,441  | 2,760,705  | 3 | 2 | 5 | 0 |
| Case 103 | 20 | 2,761,098  | 4,285,493  | 3 | 1 | 4 | 0 |
| Case 103 | 20 | 4,287,971  | 4,703,120  | 3 | 2 | 5 | 0 |
| Case 103 | 20 | 4,703,380  | 6,843,033  | 3 | 1 | 4 | 0 |
| Case 103 | 20 | 6,844,846  | 7,687,801  | 3 | 2 | 5 | 0 |
| Case 103 | 20 | 7,689,193  | 8,008,166  | 3 | 1 | 4 | 0 |
| Case 103 | 20 | 8,009,127  | 15,560,116 | 3 | 2 | 5 | 0 |
| Case 103 | 20 | 15,560,791 | 15,644,667 | 3 | 1 | 4 | 0 |
| Case 103 | 20 | 15,645,021 | 20,051,890 | 3 | 2 | 5 | 0 |
| Case 103 | 20 | 20,053,676 | 26,293,985 | 3 | 1 | 4 | 0 |
| Case 103 | 20 | 29,425,357 | 31,622,711 | 3 | 1 | 4 | 0 |
| Case 103 | 20 | 31,622,900 | 32,198,926 | 3 | 2 | 5 | 0 |
| Case 103 | 20 | 32,202,779 | 35,226,873 | 3 | 1 | 4 | 0 |
| Case 103 | 20 | 35,233,315 | 36,640,885 | 3 | 2 | 5 | 0 |
| Case 103 | 20 | 36,640,975 | 36,999,382 | 3 | 1 | 4 | 0 |
| Case 103 | 20 | 37,001,761 | 39,313,690 | 3 | 2 | 5 | 0 |
| Case 103 | 20 | 39,320,751 | 40,080,554 | 3 | 1 | 4 | 0 |
| Case 103 | 20 | 40,081,419 | 40,512,062 | 3 | 2 | 5 | 0 |
| Case 103 | 20 | 40,513,571 | 40,912,801 | 3 | 1 | 4 | 0 |
| Case 103 | 20 | 40,915,410 | 43,309,278 | 3 | 2 | 5 | 0 |
| Case 103 | 20 | 43,310,251 | 44,902,046 | 3 | 1 | 4 | 0 |
| Case 103 | 20 | 44,902,426 | 47,096,920 | 3 | 2 | 5 | 0 |

|          |    |             |             |   |   |   |   |
|----------|----|-------------|-------------|---|---|---|---|
| Case 103 | 20 | 47,097,755  | 47,319,568  | 3 | 1 | 4 | 0 |
| Case 103 | 20 | 47,325,460  | 57,210,254  | 3 | 2 | 5 | 0 |
| Case 103 | 20 | 57,212,541  | 58,384,038  | 3 | 1 | 4 | 0 |
| Case 103 | 20 | 58,384,451  | 59,142,595  | 3 | 2 | 5 | 0 |
| Case 103 | 20 | 59,146,696  | 62,948,788  | 3 | 1 | 4 | 0 |
| Case 103 | 21 | 10,827,533  | 10,971,337  | 2 | 1 | 3 | 0 |
| Case 103 | 21 | 14,368,320  | 46,000,594  | 2 | 1 | 3 | 0 |
| Case 103 | 21 | 46,000,954  | 46,116,223  | 3 | 0 | 3 | 1 |
| Case 103 | 21 | 46,116,432  | 48,100,155  | 2 | 1 | 3 | 0 |
| Case 103 | 22 | 16,114,244  | 51,195,728  | 2 | 1 | 3 | 0 |
| Case 104 | 1  | 82,154      | 30,496,978  | 1 | 1 | 2 | 0 |
| Case 104 | 1  | 30,497,242  | 30,830,505  | 1 | 0 | 1 | 0 |
| Case 104 | 1  | 30,843,915  | 32,677,404  | 1 | 1 | 2 | 0 |
| Case 104 | 1  | 32,677,405  | 32,879,586  | 2 | 0 | 2 | 1 |
| Case 104 | 1  | 32,889,223  | 34,089,394  | 2 | 1 | 3 | 0 |
| Case 104 | 1  | 34,090,145  | 121,346,616 | 1 | 1 | 2 | 0 |
| Case 104 | 1  | 142,649,718 | 144,886,136 | 1 | 1 | 2 | 0 |
| Case 104 | 1  | 144,886,220 | 151,377,648 | 3 | 0 | 3 | 1 |
| Case 104 | 1  | 151,377,952 | 151,407,693 | 7 | 0 | 7 | 1 |
| Case 104 | 1  | 151,413,180 | 199,464,611 | 3 | 0 | 3 | 1 |
| Case 104 | 1  | 199,471,616 | 200,880,817 | 4 | 0 | 4 | 1 |
| Case 104 | 1  | 200,881,595 | 200,967,638 | 2 | 1 | 3 | 0 |
| Case 104 | 1  | 200,971,329 | 208,393,548 | 3 | 0 | 3 | 1 |
| Case 104 | 1  | 208,397,575 | 219,802,508 | 4 | 0 | 4 | 1 |
| Case 104 | 1  | 219,810,518 | 220,601,623 | 2 | 1 | 3 | 0 |
| Case 104 | 1  | 220,604,048 | 220,604,048 | 1 | 1 | 2 | 0 |
| Case 104 | 1  | 220,606,276 | 226,016,575 | 4 | 0 | 4 | 1 |
| Case 104 | 1  | 226,016,593 | 226,032,896 | 2 | 1 | 3 | 0 |
| Case 104 | 1  | 226,032,903 | 226,131,691 | 1 | 1 | 2 | 0 |
| Case 104 | 1  | 226,135,132 | 228,296,745 | 4 | 0 | 4 | 1 |
| Case 104 | 1  | 228,297,613 | 228,879,311 | 3 | 0 | 3 | 1 |
| Case 104 | 1  | 228,880,021 | 232,570,049 | 4 | 0 | 4 | 1 |
| Case 104 | 1  | 232,570,234 | 235,324,276 | 3 | 0 | 3 | 1 |
| Case 104 | 1  | 235,324,298 | 235,325,570 | 1 | 1 | 2 | 0 |
| Case 104 | 1  | 235,327,138 | 235,327,138 | 3 | 0 | 3 | 1 |
| Case 104 | 1  | 235,328,341 | 235,338,597 | 4 | 0 | 4 | 1 |
| Case 104 | 1  | 235,338,600 | 235,338,600 | 1 | 1 | 2 | 0 |
| Case 104 | 1  | 235,338,618 | 236,848,268 | 4 | 0 | 4 | 1 |
| Case 104 | 1  | 236,848,751 | 237,089,463 | 2 | 1 | 3 | 0 |
| Case 104 | 1  | 237,089,660 | 237,110,626 | 1 | 1 | 2 | 0 |
| Case 104 | 1  | 237,110,859 | 249,218,992 | 4 | 0 | 4 | 1 |
| Case 104 | 2  | 18,674      | 1,670,117   | 2 | 0 | 2 | 1 |
| Case 104 | 2  | 1,670,156   | 1,940,723   | 2 | 1 | 3 | 0 |
| Case 104 | 2  | 1,946,914   | 2,522,028   | 2 | 0 | 2 | 1 |
| Case 104 | 2  | 2,526,178   | 3,243,238   | 2 | 1 | 3 | 0 |
| Case 104 | 2  | 3,243,694   | 3,706,055   | 2 | 0 | 2 | 1 |
| Case 104 | 2  | 3,706,812   | 3,838,226   | 2 | 1 | 3 | 0 |
| Case 104 | 2  | 3,839,093   | 5,838,030   | 2 | 0 | 2 | 1 |
| Case 104 | 2  | 5,839,686   | 6,162,581   | 2 | 1 | 3 | 0 |
| Case 104 | 2  | 6,162,992   | 7,252,209   | 2 | 0 | 2 | 1 |
| Case 104 | 2  | 7,256,134   | 8,117,416   | 2 | 1 | 3 | 0 |
| Case 104 | 2  | 8,118,123   | 8,285,108   | 2 | 0 | 2 | 1 |
| Case 104 | 2  | 8,285,148   | 9,235,586   | 2 | 1 | 3 | 0 |
| Case 104 | 2  | 9,237,190   | 10,269,367  | 2 | 0 | 2 | 1 |
| Case 104 | 2  | 10,271,196  | 12,464,136  | 2 | 1 | 3 | 0 |
| Case 104 | 2  | 12,465,306  | 14,309,625  | 2 | 0 | 2 | 1 |
| Case 104 | 2  | 14,312,862  | 14,702,349  | 2 | 1 | 3 | 0 |
| Case 104 | 2  | 14,702,424  | 15,909,600  | 2 | 0 | 2 | 1 |
| Case 104 | 2  | 15,910,111  | 17,009,381  | 2 | 1 | 3 | 0 |
| Case 104 | 2  | 17,011,894  | 21,225,485  | 2 | 0 | 2 | 1 |
| Case 104 | 2  | 21,225,491  | 21,239,404  | 2 | 1 | 3 | 0 |

|          |   |             |             |   |   |   |   |
|----------|---|-------------|-------------|---|---|---|---|
| Case 104 | 2 | 21,239,443  | 23,746,800  | 2 | 0 | 2 | 1 |
| Case 104 | 2 | 23,754,948  | 24,392,618  | 2 | 1 | 3 | 0 |
| Case 104 | 2 | 24,397,572  | 25,194,771  | 2 | 0 | 2 | 1 |
| Case 104 | 2 | 25,230,670  | 25,921,254  | 2 | 1 | 3 | 0 |
| Case 104 | 2 | 25,948,600  | 27,666,834  | 2 | 0 | 2 | 1 |
| Case 104 | 2 | 27,667,108  | 29,195,674  | 2 | 1 | 3 | 0 |
| Case 104 | 2 | 29,196,785  | 29,494,740  | 2 | 0 | 2 | 1 |
| Case 104 | 2 | 29,497,967  | 29,746,757  | 2 | 1 | 3 | 0 |
| Case 104 | 2 | 29,746,841  | 30,029,139  | 2 | 0 | 2 | 1 |
| Case 104 | 2 | 30,029,875  | 32,581,486  | 2 | 1 | 3 | 0 |
| Case 104 | 2 | 32,597,234  | 35,955,381  | 2 | 0 | 2 | 1 |
| Case 104 | 2 | 35,957,851  | 36,737,128  | 2 | 1 | 3 | 0 |
| Case 104 | 2 | 36,737,179  | 38,372,878  | 2 | 0 | 2 | 1 |
| Case 104 | 2 | 38,373,552  | 39,481,660  | 2 | 1 | 3 | 0 |
| Case 104 | 2 | 39,485,516  | 39,683,930  | 2 | 0 | 2 | 1 |
| Case 104 | 2 | 39,689,746  | 40,826,397  | 2 | 1 | 3 | 0 |
| Case 104 | 2 | 40,832,632  | 41,532,103  | 2 | 0 | 2 | 1 |
| Case 104 | 2 | 41,532,477  | 43,102,327  | 2 | 1 | 3 | 0 |
| Case 104 | 2 | 43,103,614  | 43,460,514  | 2 | 0 | 2 | 1 |
| Case 104 | 2 | 43,466,619  | 44,040,347  | 2 | 1 | 3 | 0 |
| Case 104 | 2 | 44,040,401  | 47,368,754  | 2 | 0 | 2 | 1 |
| Case 104 | 2 | 47,372,425  | 48,116,126  | 2 | 1 | 3 | 0 |
| Case 104 | 2 | 48,124,504  | 48,594,355  | 2 | 0 | 2 | 1 |
| Case 104 | 2 | 48,597,559  | 49,825,824  | 2 | 1 | 3 | 0 |
| Case 104 | 2 | 49,827,891  | 50,660,985  | 2 | 0 | 2 | 1 |
| Case 104 | 2 | 50,661,643  | 51,584,418  | 2 | 1 | 3 | 0 |
| Case 104 | 2 | 51,593,059  | 54,101,772  | 2 | 0 | 2 | 1 |
| Case 104 | 2 | 54,109,239  | 54,366,580  | 2 | 1 | 3 | 0 |
| Case 104 | 2 | 54,372,118  | 60,528,759  | 2 | 0 | 2 | 1 |
| Case 104 | 2 | 60,529,026  | 62,673,967  | 2 | 1 | 3 | 0 |
| Case 104 | 2 | 62,676,906  | 64,029,271  | 2 | 0 | 2 | 1 |
| Case 104 | 2 | 64,041,944  | 65,291,546  | 2 | 1 | 3 | 0 |
| Case 104 | 2 | 65,296,657  | 65,586,769  | 2 | 0 | 2 | 1 |
| Case 104 | 2 | 65,592,325  | 65,926,939  | 2 | 1 | 3 | 0 |
| Case 104 | 2 | 65,928,971  | 70,514,023  | 2 | 0 | 2 | 1 |
| Case 104 | 2 | 70,520,498  | 71,145,643  | 2 | 1 | 3 | 0 |
| Case 104 | 2 | 71,148,281  | 71,525,602  | 2 | 0 | 2 | 1 |
| Case 104 | 2 | 71,525,698  | 71,740,851  | 2 | 1 | 3 | 0 |
| Case 104 | 2 | 71,740,884  | 71,929,775  | 2 | 0 | 2 | 1 |
| Case 104 | 2 | 71,932,953  | 72,160,412  | 2 | 1 | 3 | 0 |
| Case 104 | 2 | 72,161,465  | 73,717,851  | 2 | 0 | 2 | 1 |
| Case 104 | 2 | 73,717,857  | 74,466,152  | 2 | 1 | 3 | 0 |
| Case 104 | 2 | 74,466,475  | 74,939,600  | 2 | 0 | 2 | 1 |
| Case 104 | 2 | 74,958,546  | 75,128,656  | 2 | 1 | 3 | 0 |
| Case 104 | 2 | 75,138,842  | 76,236,858  | 2 | 0 | 2 | 1 |
| Case 104 | 2 | 76,240,260  | 76,453,762  | 1 | 0 | 1 | 0 |
| Case 104 | 2 | 76,464,500  | 79,227,053  | 2 | 0 | 2 | 1 |
| Case 104 | 2 | 79,227,099  | 79,518,889  | 2 | 1 | 3 | 0 |
| Case 104 | 2 | 79,520,327  | 85,290,623  | 2 | 0 | 2 | 1 |
| Case 104 | 2 | 85,291,829  | 85,546,615  | 2 | 1 | 3 | 0 |
| Case 104 | 2 | 85,546,932  | 85,731,858  | 2 | 0 | 2 | 1 |
| Case 104 | 2 | 85,738,374  | 85,824,291  | 2 | 1 | 3 | 0 |
| Case 104 | 2 | 85,824,592  | 86,374,842  | 2 | 0 | 2 | 1 |
| Case 104 | 2 | 86,376,089  | 86,857,824  | 2 | 1 | 3 | 0 |
| Case 104 | 2 | 86,872,835  | 88,392,018  | 2 | 0 | 2 | 1 |
| Case 104 | 2 | 88,393,416  | 92,081,640  | 2 | 1 | 3 | 0 |
| Case 104 | 2 | 95,429,424  | 96,385,848  | 2 | 1 | 3 | 0 |
| Case 104 | 2 | 96,391,109  | 99,548,333  | 2 | 0 | 2 | 1 |
| Case 104 | 2 | 99,549,154  | 99,881,228  | 2 | 1 | 3 | 0 |
| Case 104 | 2 | 99,898,998  | 100,678,069 | 2 | 0 | 2 | 1 |
| Case 104 | 2 | 100,678,198 | 101,594,191 | 2 | 1 | 3 | 0 |

|          |   |             |             |   |   |   |   |
|----------|---|-------------|-------------|---|---|---|---|
| Case 104 | 2 | 101,595,475 | 101,706,787 | 2 | 0 | 2 | 1 |
| Case 104 | 2 | 101,710,796 | 103,729,418 | 2 | 1 | 3 | 0 |
| Case 104 | 2 | 103,740,513 | 104,286,032 | 2 | 0 | 2 | 1 |
| Case 104 | 2 | 104,298,541 | 105,341,447 | 2 | 1 | 3 | 0 |
| Case 104 | 2 | 105,342,436 | 106,579,871 | 2 | 0 | 2 | 1 |
| Case 104 | 2 | 106,582,663 | 106,951,208 | 2 | 1 | 3 | 0 |
| Case 104 | 2 | 106,954,287 | 108,711,926 | 2 | 0 | 2 | 1 |
| Case 104 | 2 | 108,717,242 | 113,807,144 | 2 | 1 | 3 | 0 |
| Case 104 | 2 | 113,809,122 | 113,890,443 | 2 | 0 | 2 | 1 |
| Case 104 | 2 | 113,890,586 | 115,380,251 | 2 | 1 | 3 | 0 |
| Case 104 | 2 | 115,380,383 | 115,946,323 | 2 | 0 | 2 | 1 |
| Case 104 | 2 | 115,948,786 | 118,250,637 | 2 | 1 | 3 | 0 |
| Case 104 | 2 | 118,258,797 | 118,809,451 | 2 | 0 | 2 | 1 |
| Case 104 | 2 | 118,814,868 | 119,429,297 | 2 | 1 | 3 | 0 |
| Case 104 | 2 | 119,435,628 | 121,322,038 | 2 | 0 | 2 | 1 |
| Case 104 | 2 | 121,327,514 | 122,492,869 | 2 | 1 | 3 | 0 |
| Case 104 | 2 | 122,492,983 | 123,302,906 | 2 | 0 | 2 | 1 |
| Case 104 | 2 | 123,304,053 | 123,548,703 | 2 | 1 | 3 | 0 |
| Case 104 | 2 | 123,556,119 | 129,163,372 | 2 | 0 | 2 | 1 |
| Case 104 | 2 | 129,171,305 | 129,326,003 | 2 | 1 | 3 | 0 |
| Case 104 | 2 | 129,331,064 | 134,945,535 | 2 | 0 | 2 | 1 |
| Case 104 | 2 | 134,945,868 | 135,711,516 | 2 | 1 | 3 | 0 |
| Case 104 | 2 | 135,711,657 | 136,937,513 | 2 | 0 | 2 | 1 |
| Case 104 | 2 | 136,944,990 | 137,062,927 | 2 | 1 | 3 | 0 |
| Case 104 | 2 | 137,065,275 | 141,739,845 | 2 | 0 | 2 | 1 |
| Case 104 | 2 | 141,742,624 | 142,124,008 | 2 | 1 | 3 | 0 |
| Case 104 | 2 | 142,134,134 | 143,278,394 | 2 | 0 | 2 | 1 |
| Case 104 | 2 | 143,290,897 | 143,799,730 | 2 | 1 | 3 | 0 |
| Case 104 | 2 | 143,816,362 | 149,268,931 | 2 | 0 | 2 | 1 |
| Case 104 | 2 | 149,270,710 | 150,146,800 | 2 | 1 | 3 | 0 |
| Case 104 | 2 | 150,147,278 | 157,566,204 | 2 | 0 | 2 | 1 |
| Case 104 | 2 | 157,583,475 | 159,196,789 | 2 | 1 | 3 | 0 |
| Case 104 | 2 | 159,196,848 | 159,489,481 | 2 | 0 | 2 | 1 |
| Case 104 | 2 | 159,490,618 | 166,941,405 | 2 | 1 | 3 | 0 |
| Case 104 | 2 | 166,943,277 | 168,426,623 | 2 | 0 | 2 | 1 |
| Case 104 | 2 | 168,434,795 | 175,776,383 | 2 | 1 | 3 | 0 |
| Case 104 | 2 | 175,779,805 | 177,615,308 | 2 | 0 | 2 | 1 |
| Case 104 | 2 | 177,615,896 | 181,772,262 | 2 | 1 | 3 | 0 |
| Case 104 | 2 | 181,784,642 | 183,621,072 | 2 | 0 | 2 | 1 |
| Case 104 | 2 | 183,622,547 | 185,861,167 | 2 | 1 | 3 | 0 |
| Case 104 | 2 | 185,865,740 | 187,801,925 | 2 | 0 | 2 | 1 |
| Case 104 | 2 | 187,802,572 | 194,228,442 | 2 | 1 | 3 | 0 |
| Case 104 | 2 | 194,236,059 | 196,698,255 | 2 | 0 | 2 | 1 |
| Case 104 | 2 | 196,699,007 | 198,809,975 | 2 | 1 | 3 | 0 |
| Case 104 | 2 | 198,819,824 | 243,048,760 | 2 | 0 | 2 | 1 |
| Case 104 | 3 | 61,495      | 4,645,916   | 2 | 2 | 4 | 0 |
| Case 104 | 3 | 4,647,026   | 4,842,231   | 2 | 1 | 3 | 0 |
| Case 104 | 3 | 4,842,276   | 8,637,456   | 2 | 2 | 4 | 0 |
| Case 104 | 3 | 8,637,715   | 10,472,916  | 2 | 1 | 3 | 0 |
| Case 104 | 3 | 10,474,137  | 12,472,095  | 2 | 2 | 4 | 0 |
| Case 104 | 3 | 12,475,088  | 13,139,968  | 2 | 1 | 3 | 0 |
| Case 104 | 3 | 13,140,472  | 15,673,269  | 2 | 2 | 4 | 0 |
| Case 104 | 3 | 15,676,984  | 16,376,279  | 2 | 1 | 3 | 0 |
| Case 104 | 3 | 16,377,067  | 20,984,404  | 2 | 2 | 4 | 0 |
| Case 104 | 3 | 20,984,501  | 21,478,645  | 2 | 1 | 3 | 0 |
| Case 104 | 3 | 21,478,694  | 22,833,705  | 2 | 2 | 4 | 0 |
| Case 104 | 3 | 22,840,407  | 23,221,931  | 2 | 1 | 3 | 0 |
| Case 104 | 3 | 23,226,298  | 61,040,860  | 2 | 0 | 2 | 1 |
| Case 104 | 3 | 61,042,317  | 61,189,520  | 1 | 0 | 1 | 0 |
| Case 104 | 3 | 61,190,233  | 90,442,925  | 2 | 0 | 2 | 1 |
| Case 104 | 3 | 93,537,290  | 93,550,578  | 2 | 0 | 2 | 1 |

|          |   |             |             |   |   |   |   |
|----------|---|-------------|-------------|---|---|---|---|
| Case 104 | 3 | 93,589,362  | 94,173,895  | 2 | 1 | 3 | 0 |
| Case 104 | 3 | 94,174,868  | 94,348,328  | 2 | 2 | 4 | 0 |
| Case 104 | 3 | 94,374,731  | 94,506,653  | 2 | 0 | 2 | 1 |
| Case 104 | 3 | 94,523,335  | 95,957,943  | 3 | 0 | 3 | 1 |
| Case 104 | 3 | 95,967,949  | 96,516,039  | 6 | 1 | 7 | 0 |
| Case 104 | 3 | 96,533,846  | 165,210,453 | 3 | 0 | 3 | 1 |
| Case 104 | 3 | 165,211,894 | 169,272,121 | 6 | 1 | 7 | 0 |
| Case 104 | 3 | 169,274,648 | 171,101,556 | 7 | 0 | 7 | 1 |
| Case 104 | 3 | 171,103,807 | 197,838,262 | 3 | 0 | 3 | 1 |
| Case 104 | 4 | 71,566      | 49,620,898  | 1 | 1 | 2 | 0 |
| Case 104 | 4 | 52,697,856  | 91,342,005  | 1 | 1 | 2 | 0 |
| Case 104 | 4 | 91,350,425  | 91,740,550  | 1 | 0 | 1 | 0 |
| Case 104 | 4 | 91,748,644  | 106,137,033 | 1 | 1 | 2 | 0 |
| Case 104 | 4 | 106,141,736 | 106,681,251 | 1 | 0 | 1 | 0 |
| Case 104 | 4 | 106,687,733 | 160,815,681 | 1 | 1 | 2 | 0 |
| Case 104 | 4 | 160,816,351 | 187,388,958 | 1 | 0 | 1 | 0 |
| Case 104 | 4 | 187,390,680 | 187,712,375 | 2 | 0 | 2 | 1 |
| Case 104 | 4 | 187,714,691 | 190,963,766 | 1 | 0 | 1 | 0 |
| Case 104 | 5 | 38,139      | 4,532,227   | 2 | 0 | 2 | 1 |
| Case 104 | 5 | 4,534,191   | 28,183,468  | 1 | 0 | 1 | 0 |
| Case 104 | 5 | 28,184,320  | 46,399,093  | 1 | 1 | 2 | 0 |
| Case 104 | 5 | 49,457,282  | 49,492,838  | 1 | 1 | 2 | 0 |
| Case 104 | 5 | 49,522,346  | 50,313,870  | 2 | 1 | 3 | 0 |
| Case 104 | 5 | 50,318,550  | 51,762,532  | 2 | 0 | 2 | 1 |
| Case 104 | 5 | 51,774,963  | 59,230,407  | 2 | 1 | 3 | 0 |
| Case 104 | 5 | 59,231,307  | 60,936,095  | 1 | 1 | 2 | 0 |
| Case 104 | 5 | 60,936,296  | 62,838,363  | 2 | 1 | 3 | 0 |
| Case 104 | 5 | 62,842,631  | 95,524,899  | 2 | 0 | 2 | 1 |
| Case 104 | 5 | 95,530,758  | 95,705,529  | 2 | 1 | 3 | 0 |
| Case 104 | 5 | 95,709,132  | 128,661,339 | 2 | 0 | 2 | 1 |
| Case 104 | 5 | 128,674,953 | 130,185,380 | 2 | 1 | 3 | 0 |
| Case 104 | 5 | 130,195,731 | 131,721,204 | 1 | 1 | 2 | 0 |
| Case 104 | 5 | 131,722,826 | 137,671,058 | 2 | 1 | 3 | 0 |
| Case 104 | 5 | 137,673,167 | 140,236,627 | 1 | 1 | 2 | 0 |
| Case 104 | 5 | 140,236,703 | 140,803,024 | 2 | 1 | 3 | 0 |
| Case 104 | 5 | 140,803,055 | 141,386,638 | 1 | 1 | 2 | 0 |
| Case 104 | 5 | 141,391,532 | 147,139,449 | 2 | 1 | 3 | 0 |
| Case 104 | 5 | 147,150,001 | 148,054,452 | 1 | 1 | 2 | 0 |
| Case 104 | 5 | 148,056,656 | 149,581,321 | 2 | 1 | 3 | 0 |
| Case 104 | 5 | 149,581,584 | 150,922,589 | 1 | 1 | 2 | 0 |
| Case 104 | 5 | 150,922,715 | 163,530,578 | 2 | 1 | 3 | 0 |
| Case 104 | 5 | 163,533,508 | 164,992,859 | 1 | 1 | 2 | 0 |
| Case 104 | 5 | 164,993,708 | 171,102,163 | 2 | 1 | 3 | 0 |
| Case 104 | 5 | 171,103,318 | 171,593,223 | 1 | 1 | 2 | 0 |
| Case 104 | 5 | 171,593,466 | 172,842,872 | 2 | 1 | 3 | 0 |
| Case 104 | 5 | 172,844,615 | 173,183,624 | 1 | 1 | 2 | 0 |
| Case 104 | 5 | 173,188,163 | 175,164,610 | 2 | 1 | 3 | 0 |
| Case 104 | 5 | 175,174,011 | 176,025,487 | 1 | 1 | 2 | 0 |
| Case 104 | 5 | 176,025,515 | 176,726,337 | 2 | 1 | 3 | 0 |
| Case 104 | 5 | 176,726,635 | 177,041,772 | 2 | 0 | 2 | 1 |
| Case 104 | 5 | 177,041,793 | 179,730,478 | 2 | 1 | 3 | 0 |
| Case 104 | 5 | 179,731,014 | 180,077,487 | 1 | 1 | 2 | 0 |
| Case 104 | 5 | 180,081,766 | 180,693,127 | 2 | 1 | 3 | 0 |
| Case 104 | 6 | 108,666     | 5,938,368   | 1 | 0 | 1 | 0 |
| Case 104 | 6 | 5,945,951   | 6,348,954   | 2 | 0 | 2 | 1 |
| Case 104 | 6 | 6,350,381   | 7,543,783   | 1 | 0 | 1 | 0 |
| Case 104 | 6 | 7,546,404   | 7,706,004   | 2 | 0 | 2 | 1 |
| Case 104 | 6 | 7,718,590   | 10,982,359  | 1 | 0 | 1 | 0 |
| Case 104 | 6 | 10,982,652  | 11,266,942  | 2 | 0 | 2 | 1 |
| Case 104 | 6 | 11,268,188  | 13,048,051  | 1 | 0 | 1 | 0 |
| Case 104 | 6 | 13,055,406  | 13,638,984  | 2 | 0 | 2 | 1 |



|          |   |             |             |   |   |   |   |
|----------|---|-------------|-------------|---|---|---|---|
| Case 104 | 6 | 13,643,291  | 26,390,316  | 1 | 0 | 1 | 0 |
| Case 104 | 6 | 26,390,439  | 26,460,047  | 2 | 0 | 2 | 1 |
| Case 104 | 6 | 26,460,721  | 29,306,350  | 1 | 0 | 1 | 0 |
| Case 104 | 6 | 29,306,656  | 29,342,227  | 2 | 0 | 2 | 1 |
| Case 104 | 6 | 29,342,236  | 30,468,791  | 3 | 1 | 4 | 0 |
| Case 104 | 6 | 30,469,190  | 30,521,187  | 4 | 0 | 4 | 1 |
| Case 104 | 6 | 30,521,435  | 30,932,682  | 4 | 1 | 5 | 0 |
| Case 104 | 6 | 30,933,794  | 30,933,864  | 3 | 1 | 4 | 0 |
| Case 104 | 6 | 30,933,975  | 31,130,865  | 4 | 0 | 4 | 1 |
| Case 104 | 6 | 31,131,707  | 31,729,904  | 4 | 1 | 5 | 0 |
| Case 104 | 6 | 31,729,905  | 31,729,925  | 4 | 0 | 4 | 1 |
| Case 104 | 6 | 31,730,607  | 31,804,610  | 3 | 1 | 4 | 0 |
| Case 104 | 6 | 31,804,729  | 32,212,233  | 4 | 0 | 4 | 1 |
| Case 104 | 6 | 32,212,264  | 32,292,715  | 5 | 1 | 6 | 0 |
| Case 104 | 6 | 32,293,152  | 58,752,089  | 2 | 1 | 3 | 0 |
| Case 104 | 6 | 61,891,118  | 115,058,847 | 2 | 1 | 3 | 0 |
| Case 104 | 6 | 115,063,621 | 127,409,882 | 2 | 2 | 4 | 0 |
| Case 104 | 6 | 127,412,728 | 128,794,068 | 2 | 1 | 3 | 0 |
| Case 104 | 6 | 128,795,887 | 132,892,200 | 2 | 2 | 4 | 0 |
| Case 104 | 6 | 132,892,253 | 133,237,051 | 2 | 1 | 3 | 0 |
| Case 104 | 6 | 133,237,557 | 138,438,723 | 2 | 2 | 4 | 0 |
| Case 104 | 6 | 138,440,838 | 139,919,937 | 2 | 1 | 3 | 0 |
| Case 104 | 6 | 139,927,204 | 144,401,799 | 2 | 2 | 4 | 0 |
| Case 104 | 6 | 144,402,945 | 162,571,263 | 2 | 1 | 3 | 0 |
| Case 104 | 6 | 162,577,258 | 162,820,114 | 2 | 0 | 2 | 1 |
| Case 104 | 6 | 162,828,829 | 169,888,764 | 2 | 1 | 3 | 0 |
| Case 104 | 6 | 169,898,317 | 169,914,218 | 1 | 1 | 2 | 0 |
| Case 104 | 6 | 169,930,402 | 170,102,970 | 2 | 0 | 2 | 1 |
| Case 104 | 6 | 170,102,973 | 170,980,171 | 2 | 1 | 3 | 0 |
| Case 104 | 7 | 44,935      | 4,821,300   | 2 | 1 | 3 | 0 |
| Case 104 | 7 | 4,821,332   | 4,841,614   | 2 | 0 | 2 | 1 |
| Case 104 | 7 | 4,843,307   | 58,019,061  | 2 | 1 | 3 | 0 |
| Case 104 | 7 | 61,056,053  | 64,416,284  | 2 | 1 | 3 | 0 |
| Case 104 | 7 | 64,426,173  | 70,209,816  | 2 | 2 | 4 | 0 |
| Case 104 | 7 | 70,213,618  | 70,449,956  | 2 | 1 | 3 | 0 |
| Case 104 | 7 | 70,453,467  | 159,119,486 | 2 | 0 | 2 | 1 |
| Case 104 | 8 | 164,984     | 3,867,513   | 2 | 2 | 4 | 0 |
| Case 104 | 8 | 3,867,760   | 4,042,746   | 2 | 1 | 3 | 0 |
| Case 104 | 8 | 4,043,515   | 10,464,727  | 2 | 2 | 4 | 0 |
| Case 104 | 8 | 10,464,755  | 10,470,632  | 2 | 1 | 3 | 0 |
| Case 104 | 8 | 10,470,709  | 15,823,912  | 2 | 2 | 4 | 0 |
| Case 104 | 8 | 15,825,165  | 17,417,329  | 3 | 2 | 5 | 0 |
| Case 104 | 8 | 17,417,839  | 17,500,162  | 2 | 2 | 4 | 0 |
| Case 104 | 8 | 17,500,223  | 17,918,527  | 3 | 2 | 5 | 0 |
| Case 104 | 8 | 17,918,934  | 18,134,632  | 2 | 2 | 4 | 0 |
| Case 104 | 8 | 18,139,163  | 18,692,408  | 3 | 2 | 5 | 0 |
| Case 104 | 8 | 18,693,453  | 18,729,577  | 2 | 2 | 4 | 0 |
| Case 104 | 8 | 18,729,593  | 20,491,363  | 3 | 1 | 4 | 0 |
| Case 104 | 8 | 20,492,352  | 20,566,971  | 4 | 0 | 4 | 1 |
| Case 104 | 8 | 20,569,247  | 22,108,611  | 2 | 1 | 3 | 0 |
| Case 104 | 8 | 22,113,430  | 22,412,114  | 2 | 2 | 4 | 0 |
| Case 104 | 8 | 22,412,121  | 23,225,732  | 2 | 1 | 3 | 0 |
| Case 104 | 8 | 23,225,745  | 24,170,983  | 2 | 2 | 4 | 0 |
| Case 104 | 8 | 24,170,994  | 24,649,816  | 2 | 1 | 3 | 0 |
| Case 104 | 8 | 24,649,968  | 25,901,579  | 2 | 2 | 4 | 0 |
| Case 104 | 8 | 25,904,764  | 26,124,195  | 2 | 1 | 3 | 0 |
| Case 104 | 8 | 26,126,137  | 27,151,698  | 2 | 2 | 4 | 0 |
| Case 104 | 8 | 27,151,729  | 33,600,806  | 2 | 1 | 3 | 0 |
| Case 104 | 8 | 33,601,599  | 35,397,152  | 2 | 2 | 4 | 0 |
| Case 104 | 8 | 35,412,398  | 41,302,561  | 2 | 1 | 3 | 0 |
| Case 104 | 8 | 41,303,896  | 41,424,636  | 2 | 0 | 2 | 1 |

|          |    |             |             |   |   |   |   |
|----------|----|-------------|-------------|---|---|---|---|
| Case 104 | 8  | 41,424,806  | 43,414,155  | 3 | 1 | 4 | 0 |
| Case 104 | 8  | 43,447,235  | 43,791,691  | 4 | 0 | 4 | 1 |
| Case 104 | 8  | 46,886,735  | 47,658,248  | 4 | 0 | 4 | 1 |
| Case 104 | 8  | 47,706,157  | 49,780,841  | 2 | 1 | 3 | 0 |
| Case 104 | 8  | 49,784,645  | 55,369,597  | 2 | 2 | 4 | 0 |
| Case 104 | 8  | 55,372,387  | 56,755,804  | 3 | 2 | 5 | 0 |
| Case 104 | 8  | 56,757,808  | 57,479,269  | 2 | 2 | 4 | 0 |
| Case 104 | 8  | 57,480,837  | 58,762,889  | 3 | 2 | 5 | 0 |
| Case 104 | 8  | 58,765,746  | 59,409,825  | 2 | 2 | 4 | 0 |
| Case 104 | 8  | 59,410,439  | 61,164,367  | 3 | 2 | 5 | 0 |
| Case 104 | 8  | 61,178,512  | 62,509,154  | 2 | 2 | 4 | 0 |
| Case 104 | 8  | 62,517,963  | 66,392,336  | 3 | 2 | 5 | 0 |
| Case 104 | 8  | 66,394,344  | 67,380,507  | 2 | 2 | 4 | 0 |
| Case 104 | 8  | 67,380,528  | 70,457,752  | 3 | 2 | 5 | 0 |
| Case 104 | 8  | 70,459,208  | 72,875,874  | 2 | 2 | 4 | 0 |
| Case 104 | 8  | 72,882,582  | 73,819,023  | 3 | 2 | 5 | 0 |
| Case 104 | 8  | 73,821,073  | 75,300,967  | 2 | 2 | 4 | 0 |
| Case 104 | 8  | 75,307,831  | 77,217,405  | 3 | 2 | 5 | 0 |
| Case 104 | 8  | 77,218,065  | 77,819,954  | 2 | 2 | 4 | 0 |
| Case 104 | 8  | 77,824,032  | 80,843,503  | 3 | 2 | 5 | 0 |
| Case 104 | 8  | 80,845,186  | 82,321,682  | 2 | 2 | 4 | 0 |
| Case 104 | 8  | 82,334,430  | 89,334,509  | 3 | 2 | 5 | 0 |
| Case 104 | 8  | 89,338,155  | 91,623,932  | 2 | 2 | 4 | 0 |
| Case 104 | 8  | 91,635,699  | 93,613,214  | 3 | 2 | 5 | 0 |
| Case 104 | 8  | 93,615,407  | 95,628,814  | 2 | 2 | 4 | 0 |
| Case 104 | 8  | 95,629,254  | 97,156,855  | 3 | 2 | 5 | 0 |
| Case 104 | 8  | 97,156,888  | 108,039,422 | 2 | 2 | 4 | 0 |
| Case 104 | 8  | 108,047,032 | 123,649,642 | 3 | 2 | 5 | 0 |
| Case 104 | 8  | 123,651,639 | 123,966,062 | 2 | 2 | 4 | 0 |
| Case 104 | 8  | 123,966,085 | 124,922,448 | 3 | 2 | 5 | 0 |
| Case 104 | 8  | 124,922,736 | 125,691,155 | 2 | 2 | 4 | 0 |
| Case 104 | 8  | 125,697,259 | 125,850,756 | 3 | 2 | 5 | 0 |
| Case 104 | 8  | 125,852,353 | 126,023,815 | 2 | 2 | 4 | 0 |
| Case 104 | 8  | 126,030,441 | 128,578,015 | 3 | 2 | 5 | 0 |
| Case 104 | 8  | 128,583,597 | 129,127,793 | 2 | 2 | 4 | 0 |
| Case 104 | 8  | 129,128,194 | 130,381,984 | 3 | 2 | 5 | 0 |
| Case 104 | 8  | 130,382,552 | 132,174,324 | 2 | 2 | 4 | 0 |
| Case 104 | 8  | 132,184,839 | 133,764,056 | 3 | 2 | 5 | 0 |
| Case 104 | 8  | 133,764,083 | 134,296,524 | 2 | 2 | 4 | 0 |
| Case 104 | 8  | 134,298,492 | 139,380,869 | 3 | 2 | 5 | 0 |
| Case 104 | 8  | 139,381,546 | 139,954,311 | 2 | 2 | 4 | 0 |
| Case 104 | 8  | 139,962,091 | 140,712,201 | 3 | 2 | 5 | 0 |
| Case 104 | 8  | 140,720,163 | 146,293,414 | 2 | 2 | 4 | 0 |
| Case 104 | 9  | 46,587      | 26,181,177  | 2 | 0 | 2 | 1 |
| Case 104 | 9  | 26,184,917  | 26,637,253  | 1 | 0 | 1 | 0 |
| Case 104 | 9  | 26,641,557  | 46,944,322  | 2 | 0 | 2 | 1 |
| Case 104 | 9  | 65,629,772  | 140,166,982 | 2 | 0 | 2 | 1 |
| Case 104 | 9  | 140,167,307 | 140,301,447 | 1 | 0 | 1 | 0 |
| Case 104 | 9  | 140,305,091 | 141,066,491 | 2 | 0 | 2 | 1 |
| Case 104 | 10 | 98,087      | 3,733,386   | 2 | 0 | 2 | 1 |
| Case 104 | 10 | 3,733,731   | 4,748,240   | 3 | 1 | 4 | 0 |
| Case 104 | 10 | 4,748,776   | 4,772,604   | 4 | 0 | 4 | 1 |
| Case 104 | 10 | 4,774,565   | 5,043,821   | 2 | 1 | 3 | 0 |
| Case 104 | 10 | 5,043,846   | 5,886,149   | 2 | 2 | 4 | 0 |
| Case 104 | 10 | 5,886,734   | 6,615,454   | 2 | 1 | 3 | 0 |
| Case 104 | 10 | 6,616,336   | 7,213,000   | 2 | 2 | 4 | 0 |
| Case 104 | 10 | 7,213,014   | 7,642,818   | 2 | 1 | 3 | 0 |
| Case 104 | 10 | 7,644,249   | 22,852,948  | 2 | 2 | 4 | 0 |
| Case 104 | 10 | 22,856,802  | 23,297,257  | 2 | 1 | 3 | 0 |
| Case 104 | 10 | 23,297,301  | 25,717,911  | 2 | 2 | 4 | 0 |
| Case 104 | 10 | 25,725,491  | 25,936,459  | 2 | 1 | 3 | 0 |

|          |    |             |             |   |   |   |   |
|----------|----|-------------|-------------|---|---|---|---|
| Case 104 | 10 | 25,958,020  | 29,003,943  | 2 | 2 | 4 | 0 |
| Case 104 | 10 | 29,005,087  | 29,327,405  | 2 | 1 | 3 | 0 |
| Case 104 | 10 | 29,330,089  | 38,501,841  | 2 | 2 | 4 | 0 |
| Case 104 | 10 | 38,502,333  | 39,058,671  | 2 | 1 | 3 | 0 |
| Case 104 | 10 | 39,070,516  | 39,097,912  | 2 | 0 | 2 | 1 |
| Case 104 | 10 | 42,436,301  | 135,477,883 | 2 | 0 | 2 | 1 |
| Case 104 | 11 | 193,146     | 5,862,566   | 2 | 0 | 2 | 1 |
| Case 104 | 11 | 5,862,607   | 6,007,271   | 3 | 0 | 3 | 1 |
| Case 104 | 11 | 6,007,272   | 36,999,385  | 2 | 0 | 2 | 1 |
| Case 104 | 11 | 37,002,821  | 39,065,712  | 1 | 0 | 1 | 0 |
| Case 104 | 11 | 39,066,761  | 40,524,159  | 1 | 1 | 2 | 0 |
| Case 104 | 11 | 40,527,150  | 45,923,697  | 2 | 1 | 3 | 0 |
| Case 104 | 11 | 45,923,929  | 46,388,375  | 1 | 1 | 2 | 0 |
| Case 104 | 11 | 46,388,881  | 51,591,253  | 2 | 1 | 3 | 0 |
| Case 104 | 11 | 54,794,237  | 55,362,955  | 2 | 1 | 3 | 0 |
| Case 104 | 11 | 55,370,325  | 55,427,700  | 0 | 0 | 0 | 0 |
| Case 104 | 11 | 55,431,897  | 55,437,126  | 1 | 1 | 2 | 0 |
| Case 104 | 11 | 55,445,294  | 65,385,649  | 2 | 1 | 3 | 0 |
| Case 104 | 11 | 65,385,680  | 65,423,327  | 1 | 1 | 2 | 0 |
| Case 104 | 11 | 65,423,347  | 67,161,030  | 2 | 1 | 3 | 0 |
| Case 104 | 11 | 67,161,231  | 67,277,475  | 1 | 1 | 2 | 0 |
| Case 104 | 11 | 67,280,620  | 78,360,321  | 2 | 1 | 3 | 0 |
| Case 104 | 11 | 78,360,830  | 78,704,703  | 2 | 0 | 2 | 1 |
| Case 104 | 11 | 78,706,607  | 87,600,576  | 2 | 1 | 3 | 0 |
| Case 104 | 11 | 87,601,746  | 91,435,248  | 3 | 1 | 4 | 0 |
| Case 104 | 11 | 91,437,329  | 91,443,021  | 4 | 0 | 4 | 1 |
| Case 104 | 11 | 91,443,158  | 98,427,125  | 2 | 1 | 3 | 0 |
| Case 104 | 11 | 98,429,292  | 102,742,592 | 2 | 0 | 2 | 1 |
| Case 104 | 11 | 102,742,653 | 103,406,150 | 2 | 1 | 3 | 0 |
| Case 104 | 11 | 103,408,327 | 104,850,440 | 2 | 0 | 2 | 1 |
| Case 104 | 11 | 104,856,055 | 108,114,727 | 2 | 1 | 3 | 0 |
| Case 104 | 11 | 108,114,749 | 109,929,743 | 2 | 0 | 2 | 1 |
| Case 104 | 11 | 109,934,487 | 111,257,202 | 2 | 1 | 3 | 0 |
| Case 104 | 11 | 111,260,202 | 111,420,440 | 2 | 0 | 2 | 1 |
| Case 104 | 11 | 111,420,936 | 111,724,133 | 2 | 1 | 3 | 0 |
| Case 104 | 11 | 111,724,183 | 113,892,617 | 1 | 1 | 2 | 0 |
| Case 104 | 11 | 113,902,210 | 116,431,521 | 2 | 1 | 3 | 0 |
| Case 104 | 11 | 116,436,362 | 116,707,736 | 2 | 0 | 2 | 1 |
| Case 104 | 11 | 116,707,739 | 118,486,067 | 2 | 1 | 3 | 0 |
| Case 104 | 11 | 118,486,833 | 119,059,239 | 2 | 0 | 2 | 1 |
| Case 104 | 11 | 119,059,247 | 121,335,915 | 2 | 1 | 3 | 0 |
| Case 104 | 11 | 121,337,993 | 122,021,283 | 2 | 0 | 2 | 1 |
| Case 104 | 11 | 122,023,511 | 123,777,302 | 2 | 1 | 3 | 0 |
| Case 104 | 11 | 123,777,307 | 124,016,724 | 2 | 0 | 2 | 1 |
| Case 104 | 11 | 124,016,820 | 124,413,198 | 2 | 1 | 3 | 0 |
| Case 104 | 11 | 124,413,214 | 124,791,314 | 2 | 0 | 2 | 1 |
| Case 104 | 11 | 124,792,627 | 125,060,910 | 2 | 1 | 3 | 0 |
| Case 104 | 11 | 125,061,547 | 125,857,745 | 2 | 0 | 2 | 1 |
| Case 104 | 11 | 125,864,206 | 126,310,156 | 2 | 1 | 3 | 0 |
| Case 104 | 11 | 126,310,299 | 126,601,540 | 2 | 0 | 2 | 1 |
| Case 104 | 11 | 126,601,735 | 127,313,452 | 2 | 1 | 3 | 0 |
| Case 104 | 11 | 127,315,468 | 134,934,063 | 1 | 0 | 1 | 0 |
| Case 104 | 12 | 191,619     | 29,149,089  | 1 | 1 | 2 | 0 |
| Case 104 | 12 | 29,180,359  | 29,333,878  | 4 | 0 | 4 | 1 |
| Case 104 | 12 | 29,338,429  | 32,453,966  | 2 | 1 | 3 | 0 |
| Case 104 | 12 | 32,454,242  | 34,853,011  | 1 | 1 | 2 | 0 |
| Case 104 | 12 | 37,876,400  | 37,942,622  | 1 | 1 | 2 | 0 |
| Case 104 | 12 | 37,961,768  | 56,030,812  | 2 | 1 | 3 | 0 |
| Case 104 | 12 | 56,030,921  | 56,221,528  | 1 | 1 | 2 | 0 |
| Case 104 | 12 | 56,221,752  | 133,810,935 | 2 | 1 | 3 | 0 |
| Case 104 | 13 | 19,058,717  | 115,103,529 | 3 | 0 | 3 | 1 |

|          |    |             |             |   |   |   |   |
|----------|----|-------------|-------------|---|---|---|---|
| Case 104 | 14 | 19,280,733  | 34,354,983  | 2 | 1 | 3 | 0 |
| Case 104 | 14 | 34,367,242  | 34,393,916  | 2 | 0 | 2 | 1 |
| Case 104 | 14 | 34,396,100  | 34,403,241  | 2 | 1 | 3 | 0 |
| Case 104 | 14 | 34,404,727  | 34,410,797  | 2 | 0 | 2 | 1 |
| Case 104 | 14 | 34,413,826  | 35,416,938  | 3 | 1 | 4 | 0 |
| Case 104 | 14 | 35,433,187  | 35,756,776  | 4 | 0 | 4 | 1 |
| Case 104 | 14 | 35,761,084  | 37,145,916  | 2 | 1 | 3 | 0 |
| Case 104 | 14 | 37,146,475  | 37,148,359  | 2 | 0 | 2 | 1 |
| Case 104 | 14 | 37,148,962  | 40,283,003  | 3 | 1 | 4 | 0 |
| Case 104 | 14 | 40,296,775  | 40,364,644  | 0 | 0 | 0 | 0 |
| Case 104 | 14 | 40,388,314  | 75,071,093  | 1 | 1 | 2 | 0 |
| Case 104 | 14 | 75,073,048  | 78,190,396  | 2 | 1 | 3 | 0 |
| Case 104 | 14 | 78,195,733  | 79,074,088  | 1 | 1 | 2 | 0 |
| Case 104 | 14 | 79,074,748  | 104,559,623 | 2 | 1 | 3 | 0 |
| Case 104 | 14 | 104,559,833 | 104,647,606 | 1 | 1 | 2 | 0 |
| Case 104 | 14 | 104,651,397 | 107,287,663 | 2 | 1 | 3 | 0 |
| Case 104 | 15 | 20,034,919  | 102,461,162 | 1 | 1 | 2 | 0 |
| Case 104 | 16 | 88,165      | 2,766,526   | 2 | 0 | 2 | 1 |
| Case 104 | 16 | 2,766,531   | 2,979,945   | 2 | 1 | 3 | 0 |
| Case 104 | 16 | 2,979,984   | 3,191,356   | 2 | 0 | 2 | 1 |
| Case 104 | 16 | 3,194,616   | 3,487,398   | 2 | 1 | 3 | 0 |
| Case 104 | 16 | 3,487,431   | 4,861,709   | 2 | 0 | 2 | 1 |
| Case 104 | 16 | 4,864,538   | 4,933,403   | 2 | 1 | 3 | 0 |
| Case 104 | 16 | 4,933,446   | 5,383,635   | 2 | 0 | 2 | 1 |
| Case 104 | 16 | 5,384,421   | 6,813,912   | 2 | 1 | 3 | 0 |
| Case 104 | 16 | 6,816,052   | 7,099,593   | 2 | 0 | 2 | 1 |
| Case 104 | 16 | 7,102,551   | 7,761,529   | 2 | 1 | 3 | 0 |
| Case 104 | 16 | 7,767,262   | 8,767,878   | 2 | 0 | 2 | 1 |
| Case 104 | 16 | 8,771,186   | 10,991,952  | 2 | 1 | 3 | 0 |
| Case 104 | 16 | 10,992,784  | 11,557,982  | 2 | 0 | 2 | 1 |
| Case 104 | 16 | 11,563,226  | 12,615,802  | 2 | 1 | 3 | 0 |
| Case 104 | 16 | 12,616,169  | 12,769,232  | 2 | 0 | 2 | 1 |
| Case 104 | 16 | 12,769,476  | 13,625,515  | 2 | 1 | 3 | 0 |
| Case 104 | 16 | 13,634,426  | 14,125,513  | 2 | 0 | 2 | 1 |
| Case 104 | 16 | 14,126,330  | 16,230,810  | 2 | 1 | 3 | 0 |
| Case 104 | 16 | 16,232,369  | 16,276,385  | 2 | 0 | 2 | 1 |
| Case 104 | 16 | 16,276,391  | 21,689,861  | 2 | 1 | 3 | 0 |
| Case 104 | 16 | 21,689,879  | 22,732,587  | 2 | 0 | 2 | 1 |
| Case 104 | 16 | 22,732,889  | 24,909,295  | 2 | 1 | 3 | 0 |
| Case 104 | 16 | 24,909,300  | 26,405,671  | 2 | 0 | 2 | 1 |
| Case 104 | 16 | 26,411,343  | 28,322,337  | 2 | 1 | 3 | 0 |
| Case 104 | 16 | 28,323,470  | 35,285,582  | 2 | 0 | 2 | 1 |
| Case 104 | 16 | 46,450,037  | 73,466,538  | 2 | 0 | 2 | 1 |
| Case 104 | 16 | 73,466,745  | 73,782,596  | 3 | 0 | 3 | 1 |
| Case 104 | 16 | 73,783,609  | 74,339,606  | 2 | 0 | 2 | 1 |
| Case 104 | 16 | 74,340,431  | 79,444,281  | 1 | 0 | 1 | 0 |
| Case 104 | 16 | 79,445,141  | 90,274,695  | 2 | 0 | 2 | 1 |
| Case 104 | 17 | 11,885      | 22,242,355  | 2 | 0 | 2 | 1 |
| Case 104 | 17 | 25,268,142  | 38,770,286  | 2 | 1 | 3 | 0 |
| Case 104 | 17 | 38,775,150  | 52,564,962  | 2 | 0 | 2 | 1 |
| Case 104 | 17 | 52,566,274  | 56,350,196  | 3 | 0 | 3 | 1 |
| Case 104 | 17 | 56,350,258  | 56,421,270  | 2 | 0 | 2 | 1 |
| Case 104 | 17 | 56,421,706  | 61,498,295  | 3 | 0 | 3 | 1 |
| Case 104 | 17 | 61,498,345  | 61,675,292  | 1 | 1 | 2 | 0 |
| Case 104 | 17 | 61,676,534  | 61,902,189  | 2 | 1 | 3 | 0 |
| Case 104 | 17 | 61,902,667  | 62,123,321  | 2 | 0 | 2 | 1 |
| Case 104 | 17 | 62,130,937  | 72,832,362  | 3 | 0 | 3 | 1 |
| Case 104 | 17 | 72,832,366  | 74,093,912  | 2 | 0 | 2 | 1 |
| Case 104 | 17 | 74,093,934  | 77,707,387  | 3 | 0 | 3 | 1 |
| Case 104 | 17 | 77,707,406  | 78,399,412  | 2 | 0 | 2 | 1 |
| Case 104 | 17 | 78,402,423  | 78,827,993  | 3 | 0 | 3 | 1 |

|          |    |             |             |   |   |   |   |
|----------|----|-------------|-------------|---|---|---|---|
| Case 104 | 17 | 78,829,069  | 79,615,022  | 2 | 0 | 2 | 1 |
| Case 104 | 17 | 79,615,825  | 79,684,871  | 3 | 0 | 3 | 1 |
| Case 104 | 17 | 79,687,893  | 81,060,040  | 2 | 0 | 2 | 1 |
| Case 104 | 18 | 87,505      | 10,986,676  | 1 | 0 | 1 | 0 |
| Case 104 | 18 | 10,997,117  | 13,157,966  | 2 | 0 | 2 | 1 |
| Case 104 | 18 | 13,163,903  | 14,419,091  | 3 | 0 | 3 | 1 |
| Case 104 | 18 | 14,419,170  | 15,375,878  | 2 | 0 | 2 | 1 |
| Case 104 | 18 | 18,520,354  | 22,033,261  | 2 | 0 | 2 | 1 |
| Case 104 | 18 | 22,039,872  | 43,223,105  | 1 | 0 | 1 | 0 |
| Case 104 | 18 | 43,224,101  | 43,341,772  | 2 | 0 | 2 | 1 |
| Case 104 | 18 | 43,346,349  | 43,860,477  | 1 | 0 | 1 | 0 |
| Case 104 | 18 | 43,864,568  | 45,631,389  | 2 | 0 | 2 | 1 |
| Case 104 | 18 | 45,631,492  | 47,265,074  | 1 | 0 | 1 | 0 |
| Case 104 | 18 | 47,269,486  | 47,640,423  | 2 | 0 | 2 | 1 |
| Case 104 | 18 | 47,641,401  | 54,694,713  | 1 | 0 | 1 | 0 |
| Case 104 | 18 | 54,699,221  | 55,412,068  | 2 | 0 | 2 | 1 |
| Case 104 | 18 | 55,414,309  | 55,990,881  | 1 | 0 | 1 | 0 |
| Case 104 | 18 | 55,991,376  | 56,279,025  | 2 | 0 | 2 | 1 |
| Case 104 | 18 | 56,279,985  | 72,976,342  | 1 | 0 | 1 | 0 |
| Case 104 | 18 | 72,982,257  | 73,290,926  | 2 | 0 | 2 | 1 |
| Case 104 | 18 | 73,293,384  | 78,015,180  | 1 | 0 | 1 | 0 |
| Case 104 | 19 | 260,912     | 2,878,238   | 2 | 0 | 2 | 1 |
| Case 104 | 19 | 2,888,242   | 3,500,714   | 2 | 1 | 3 | 0 |
| Case 104 | 19 | 3,511,709   | 3,769,049   | 1 | 1 | 2 | 0 |
| Case 104 | 19 | 3,771,586   | 10,468,453  | 2 | 0 | 2 | 1 |
| Case 104 | 19 | 10,468,465  | 11,461,601  | 1 | 1 | 2 | 0 |
| Case 104 | 19 | 11,462,808  | 15,141,624  | 2 | 0 | 2 | 1 |
| Case 104 | 19 | 15,143,453  | 15,206,661  | 2 | 1 | 3 | 0 |
| Case 104 | 19 | 15,209,603  | 15,565,474  | 1 | 1 | 2 | 0 |
| Case 104 | 19 | 15,565,646  | 16,606,070  | 2 | 1 | 3 | 0 |
| Case 104 | 19 | 16,606,630  | 16,884,009  | 1 | 1 | 2 | 0 |
| Case 104 | 19 | 16,884,055  | 24,629,285  | 2 | 0 | 2 | 1 |
| Case 104 | 19 | 27,732,159  | 59,097,160  | 2 | 0 | 2 | 1 |
| Case 104 | 20 | 63,244      | 26,293,985  | 2 | 0 | 2 | 1 |
| Case 104 | 20 | 29,425,357  | 62,948,788  | 3 | 1 | 4 | 0 |
| Case 104 | 21 | 10,827,533  | 10,971,337  | 2 | 1 | 3 | 0 |
| Case 104 | 21 | 14,368,320  | 20,986,798  | 2 | 1 | 3 | 0 |
| Case 104 | 21 | 20,988,134  | 48,100,155  | 1 | 1 | 2 | 0 |
| Case 104 | 22 | 16,114,244  | 51,195,728  | 2 | 0 | 2 | 1 |
| Case 105 | 1  | 82,154      | 82,154      | 4 | 1 | 5 | 0 |
| Case 105 | 1  | 752,566     | 1,247,826   | 6 | 0 | 6 | 1 |
| Case 105 | 1  | 1,248,041   | 1,248,329   | 3 | 1 | 4 | 0 |
| Case 105 | 1  | 1,249,187   | 1,563,100   | 4 | 1 | 5 | 0 |
| Case 105 | 1  | 1,563,105   | 3,616,601   | 6 | 0 | 6 | 1 |
| Case 105 | 1  | 3,628,677   | 3,628,677   | 3 | 1 | 4 | 0 |
| Case 105 | 1  | 3,630,476   | 3,630,476   | 2 | 1 | 3 | 0 |
| Case 105 | 1  | 3,632,608   | 5,915,662   | 5 | 0 | 5 | 1 |
| Case 105 | 1  | 5,916,458   | 5,966,661   | 3 | 1 | 4 | 0 |
| Case 105 | 1  | 5,969,237   | 7,405,293   | 4 | 1 | 5 | 0 |
| Case 105 | 1  | 7,406,010   | 7,667,122   | 3 | 1 | 4 | 0 |
| Case 105 | 1  | 7,668,346   | 87,774,994  | 2 | 1 | 3 | 0 |
| Case 105 | 1  | 87,781,157  | 87,826,745  | 4 | 1 | 5 | 0 |
| Case 105 | 1  | 87,826,767  | 91,119,499  | 5 | 1 | 6 | 0 |
| Case 105 | 1  | 91,120,020  | 91,456,926  | 4 | 1 | 5 | 0 |
| Case 105 | 1  | 91,460,362  | 109,804,646 | 3 | 1 | 4 | 0 |
| Case 105 | 1  | 109,804,917 | 110,305,188 | 2 | 1 | 3 | 0 |
| Case 105 | 1  | 110,307,190 | 121,346,616 | 3 | 1 | 4 | 0 |
| Case 105 | 1  | 142,649,718 | 145,416,056 | 3 | 1 | 4 | 0 |
| Case 105 | 1  | 145,416,337 | 147,808,631 | 4 | 1 | 5 | 0 |
| Case 105 | 1  | 147,814,694 | 149,908,108 | 3 | 1 | 4 | 0 |
| Case 105 | 1  | 149,909,495 | 150,443,354 | 4 | 1 | 5 | 0 |

|          |   |             |             |   |   |   |   |
|----------|---|-------------|-------------|---|---|---|---|
| Case 105 | 1 | 150,443,553 | 150,526,146 | 3 | 1 | 4 | 0 |
| Case 105 | 1 | 150,526,216 | 152,275,273 | 4 | 1 | 5 | 0 |
| Case 105 | 1 | 152,275,276 | 152,286,145 | 3 | 1 | 4 | 0 |
| Case 105 | 1 | 152,286,157 | 154,987,947 | 4 | 1 | 5 | 0 |
| Case 105 | 1 | 154,987,980 | 155,264,433 | 3 | 1 | 4 | 0 |
| Case 105 | 1 | 155,265,228 | 184,764,457 | 4 | 1 | 5 | 0 |
| Case 105 | 1 | 184,764,601 | 184,792,315 | 3 | 1 | 4 | 0 |
| Case 105 | 1 | 184,792,432 | 185,891,569 | 4 | 2 | 6 | 0 |
| Case 105 | 1 | 185,891,584 | 186,277,088 | 4 | 1 | 5 | 0 |
| Case 105 | 1 | 186,277,099 | 186,278,240 | 3 | 1 | 4 | 0 |
| Case 105 | 1 | 186,280,235 | 199,263,161 | 4 | 2 | 6 | 0 |
| Case 105 | 1 | 199,265,270 | 205,030,498 | 4 | 1 | 5 | 0 |
| Case 105 | 1 | 205,030,522 | 205,053,097 | 3 | 1 | 4 | 0 |
| Case 105 | 1 | 205,053,130 | 218,858,100 | 4 | 1 | 5 | 0 |
| Case 105 | 1 | 218,860,068 | 218,882,604 | 3 | 1 | 4 | 0 |
| Case 105 | 1 | 218,891,136 | 219,762,581 | 4 | 2 | 6 | 0 |
| Case 105 | 1 | 219,770,722 | 224,905,913 | 4 | 1 | 5 | 0 |
| Case 105 | 1 | 224,906,158 | 224,953,318 | 3 | 1 | 4 | 0 |
| Case 105 | 1 | 224,966,644 | 225,842,940 | 4 | 2 | 6 | 0 |
| Case 105 | 1 | 225,853,826 | 238,048,809 | 4 | 1 | 5 | 0 |
| Case 105 | 1 | 238,049,083 | 238,053,873 | 3 | 1 | 4 | 0 |
| Case 105 | 1 | 238,055,618 | 240,511,965 | 4 | 2 | 6 | 0 |
| Case 105 | 1 | 240,519,677 | 246,242,908 | 4 | 1 | 5 | 0 |
| Case 105 | 1 | 246,243,336 | 247,262,367 | 5 | 1 | 6 | 0 |
| Case 105 | 1 | 247,262,625 | 247,263,818 | 3 | 1 | 4 | 0 |
| Case 105 | 1 | 247,264,263 | 248,688,317 | 4 | 1 | 5 | 0 |
| Case 105 | 1 | 248,756,502 | 248,790,425 | 1 | 1 | 2 | 0 |
| Case 105 | 1 | 248,801,588 | 249,218,992 | 4 | 1 | 5 | 0 |
| Case 105 | 2 | 18,674      | 3,927,175   | 2 | 2 | 4 | 0 |
| Case 105 | 2 | 3,928,737   | 4,264,833   | 3 | 2 | 5 | 0 |
| Case 105 | 2 | 4,267,357   | 5,277,069   | 2 | 2 | 4 | 0 |
| Case 105 | 2 | 5,283,993   | 5,693,857   | 3 | 2 | 5 | 0 |
| Case 105 | 2 | 5,700,470   | 7,997,419   | 2 | 2 | 4 | 0 |
| Case 105 | 2 | 7,998,625   | 8,788,439   | 3 | 2 | 5 | 0 |
| Case 105 | 2 | 8,790,973   | 23,569,402  | 2 | 2 | 4 | 0 |
| Case 105 | 2 | 23,569,877  | 23,970,165  | 2 | 1 | 3 | 0 |
| Case 105 | 2 | 23,972,846  | 26,953,354  | 2 | 2 | 4 | 0 |
| Case 105 | 2 | 26,954,991  | 27,501,149  | 2 | 1 | 3 | 0 |
| Case 105 | 2 | 27,501,909  | 31,562,365  | 2 | 2 | 4 | 0 |
| Case 105 | 2 | 31,562,392  | 31,621,544  | 2 | 1 | 3 | 0 |
| Case 105 | 2 | 31,621,598  | 73,374,096  | 2 | 2 | 4 | 0 |
| Case 105 | 2 | 73,378,241  | 73,928,414  | 2 | 1 | 3 | 0 |
| Case 105 | 2 | 73,928,422  | 74,517,251  | 2 | 2 | 4 | 0 |
| Case 105 | 2 | 74,531,420  | 74,750,039  | 2 | 1 | 3 | 0 |
| Case 105 | 2 | 74,750,341  | 92,081,640  | 2 | 2 | 4 | 0 |
| Case 105 | 2 | 95,429,424  | 102,788,774 | 2 | 2 | 4 | 0 |
| Case 105 | 2 | 102,789,698 | 103,068,837 | 2 | 1 | 3 | 0 |
| Case 105 | 2 | 103,070,568 | 129,153,267 | 2 | 2 | 4 | 0 |
| Case 105 | 2 | 129,153,304 | 129,751,723 | 2 | 1 | 3 | 0 |
| Case 105 | 2 | 129,753,114 | 147,586,507 | 2 | 2 | 4 | 0 |
| Case 105 | 2 | 147,591,374 | 180,324,063 | 2 | 1 | 3 | 0 |
| Case 105 | 2 | 180,329,583 | 180,681,868 | 3 | 1 | 4 | 0 |
| Case 105 | 2 | 180,684,202 | 182,572,502 | 2 | 1 | 3 | 0 |
| Case 105 | 2 | 182,580,567 | 219,409,308 | 3 | 1 | 4 | 0 |
| Case 105 | 2 | 219,411,735 | 219,679,301 | 2 | 1 | 3 | 0 |
| Case 105 | 2 | 219,679,662 | 219,846,749 | 3 | 1 | 4 | 0 |
| Case 105 | 2 | 219,853,159 | 220,577,351 | 2 | 1 | 3 | 0 |
| Case 105 | 2 | 220,580,548 | 224,605,314 | 3 | 1 | 4 | 0 |
| Case 105 | 2 | 224,605,340 | 224,926,358 | 2 | 1 | 3 | 0 |
| Case 105 | 2 | 224,929,412 | 241,385,823 | 3 | 1 | 4 | 0 |
| Case 105 | 2 | 241,390,002 | 241,537,306 | 2 | 1 | 3 | 0 |

|          |   |             |             |   |   |   |   |
|----------|---|-------------|-------------|---|---|---|---|
| Case 105 | 2 | 241,538,074 | 241,808,687 | 3 | 1 | 4 | 0 |
| Case 105 | 2 | 241,810,850 | 241,898,520 | 2 | 1 | 3 | 0 |
| Case 105 | 2 | 241,911,027 | 242,545,879 | 3 | 1 | 4 | 0 |
| Case 105 | 2 | 242,545,886 | 242,710,662 | 3 | 0 | 3 | 1 |
| Case 105 | 2 | 242,710,935 | 243,048,760 | 3 | 1 | 4 | 0 |
| Case 105 | 3 | 61,495      | 77,180,639  | 2 | 1 | 3 | 0 |
| Case 105 | 3 | 77,188,041  | 77,712,583  | 1 | 1 | 2 | 0 |
| Case 105 | 3 | 77,714,832  | 90,442,925  | 2 | 1 | 3 | 0 |
| Case 105 | 3 | 93,537,290  | 130,346,199 | 2 | 1 | 3 | 0 |
| Case 105 | 3 | 130,346,716 | 130,409,469 | 2 | 0 | 2 | 1 |
| Case 105 | 3 | 130,409,494 | 197,838,262 | 2 | 1 | 3 | 0 |
| Case 105 | 4 | 71,566      | 155,675     | 1 | 0 | 1 | 0 |
| Case 105 | 4 | 171,534     | 26,121,018  | 1 | 1 | 2 | 0 |
| Case 105 | 4 | 26,132,361  | 30,726,226  | 4 | 1 | 5 | 0 |
| Case 105 | 4 | 30,727,233  | 31,187,185  | 5 | 1 | 6 | 0 |
| Case 105 | 4 | 31,187,606  | 31,187,606  | 3 | 1 | 4 | 0 |
| Case 105 | 4 | 31,190,168  | 36,915,898  | 7 | 0 | 7 | 1 |
| Case 105 | 4 | 36,916,955  | 39,619,870  | 3 | 1 | 4 | 0 |
| Case 105 | 4 | 39,637,826  | 49,620,898  | 2 | 1 | 3 | 0 |
| Case 105 | 4 | 52,697,856  | 91,900,701  | 2 | 1 | 3 | 0 |
| Case 105 | 4 | 91,902,620  | 92,054,563  | 2 | 0 | 2 | 1 |
| Case 105 | 4 | 92,063,883  | 189,070,726 | 2 | 1 | 3 | 0 |
| Case 105 | 4 | 189,081,654 | 190,963,766 | 2 | 0 | 2 | 1 |
| Case 105 | 5 | 38,139      | 2,571,422   | 2 | 1 | 3 | 0 |
| Case 105 | 5 | 2,572,654   | 2,622,918   | 2 | 0 | 2 | 1 |
| Case 105 | 5 | 2,625,833   | 22,193,967  | 2 | 1 | 3 | 0 |
| Case 105 | 5 | 22,219,503  | 26,299,629  | 3 | 1 | 4 | 0 |
| Case 105 | 5 | 26,322,668  | 29,193,998  | 2 | 1 | 3 | 0 |
| Case 105 | 5 | 29,211,937  | 32,069,412  | 3 | 1 | 4 | 0 |
| Case 105 | 5 | 32,069,709  | 32,321,077  | 2 | 1 | 3 | 0 |
| Case 105 | 5 | 32,326,234  | 37,333,727  | 3 | 1 | 4 | 0 |
| Case 105 | 5 | 37,337,963  | 37,479,198  | 1 | 1 | 2 | 0 |
| Case 105 | 5 | 37,489,442  | 46,252,282  | 3 | 1 | 4 | 0 |
| Case 105 | 5 | 46,332,383  | 46,399,093  | 1 | 1 | 2 | 0 |
| Case 105 | 5 | 49,457,282  | 139,931,613 | 1 | 1 | 2 | 0 |
| Case 105 | 5 | 139,931,617 | 139,931,652 | 1 | 0 | 1 | 0 |
| Case 105 | 5 | 139,931,653 | 180,693,127 | 1 | 1 | 2 | 0 |
| Case 105 | 6 | 108,666     | 802,938     | 3 | 1 | 4 | 0 |
| Case 105 | 6 | 803,882     | 1,139,117   | 2 | 2 | 4 | 0 |
| Case 105 | 6 | 1,144,109   | 1,216,376   | 3 | 1 | 4 | 0 |
| Case 105 | 6 | 1,216,558   | 1,397,839   | 2 | 2 | 4 | 0 |
| Case 105 | 6 | 1,402,537   | 1,404,628   | 3 | 1 | 4 | 0 |
| Case 105 | 6 | 1,405,284   | 2,602,357   | 3 | 2 | 5 | 0 |
| Case 105 | 6 | 2,604,645   | 3,569,421   | 2 | 2 | 4 | 0 |
| Case 105 | 6 | 3,572,371   | 3,745,723   | 3 | 2 | 5 | 0 |
| Case 105 | 6 | 3,749,106   | 3,958,481   | 2 | 2 | 4 | 0 |
| Case 105 | 6 | 3,960,888   | 4,122,279   | 3 | 2 | 5 | 0 |
| Case 105 | 6 | 4,125,474   | 5,106,807   | 2 | 2 | 4 | 0 |
| Case 105 | 6 | 5,107,943   | 5,488,980   | 3 | 2 | 5 | 0 |
| Case 105 | 6 | 5,489,201   | 6,420,874   | 2 | 2 | 4 | 0 |
| Case 105 | 6 | 6,423,728   | 6,621,962   | 3 | 2 | 5 | 0 |
| Case 105 | 6 | 6,623,677   | 8,476,862   | 2 | 2 | 4 | 0 |
| Case 105 | 6 | 8,483,819   | 10,268,828  | 3 | 2 | 5 | 0 |
| Case 105 | 6 | 10,269,064  | 11,774,583  | 2 | 2 | 4 | 0 |
| Case 105 | 6 | 11,774,626  | 11,908,166  | 3 | 2 | 5 | 0 |
| Case 105 | 6 | 11,912,213  | 12,170,927  | 2 | 2 | 4 | 0 |
| Case 105 | 6 | 12,173,757  | 12,540,827  | 3 | 2 | 5 | 0 |
| Case 105 | 6 | 12,544,251  | 12,558,110  | 2 | 2 | 4 | 0 |
| Case 105 | 6 | 12,558,421  | 12,581,864  | 2 | 1 | 3 | 0 |
| Case 105 | 6 | 12,581,921  | 14,131,854  | 3 | 1 | 4 | 0 |
| Case 105 | 6 | 14,131,881  | 14,517,404  | 3 | 2 | 5 | 0 |

|          |   |            |            |   |   |   |   |
|----------|---|------------|------------|---|---|---|---|
| Case 105 | 6 | 14,522,827 | 14,956,881 | 2 | 2 | 4 | 0 |
| Case 105 | 6 | 14,956,927 | 15,408,528 | 3 | 2 | 5 | 0 |
| Case 105 | 6 | 15,410,647 | 15,886,775 | 2 | 2 | 4 | 0 |
| Case 105 | 6 | 15,900,124 | 15,923,323 | 2 | 1 | 3 | 0 |
| Case 105 | 6 | 15,927,034 | 16,552,802 | 3 | 1 | 4 | 0 |
| Case 105 | 6 | 16,553,926 | 16,806,573 | 3 | 2 | 5 | 0 |
| Case 105 | 6 | 16,807,092 | 17,031,611 | 2 | 2 | 4 | 0 |
| Case 105 | 6 | 17,034,315 | 17,048,225 | 2 | 1 | 3 | 0 |
| Case 105 | 6 | 17,054,240 | 19,038,132 | 3 | 1 | 4 | 0 |
| Case 105 | 6 | 19,045,560 | 19,848,673 | 3 | 2 | 5 | 0 |
| Case 105 | 6 | 19,850,707 | 20,740,296 | 2 | 2 | 4 | 0 |
| Case 105 | 6 | 20,743,952 | 21,215,485 | 3 | 2 | 5 | 0 |
| Case 105 | 6 | 21,216,746 | 22,405,396 | 2 | 2 | 4 | 0 |
| Case 105 | 6 | 22,417,829 | 22,748,186 | 3 | 2 | 5 | 0 |
| Case 105 | 6 | 22,749,157 | 23,034,461 | 2 | 2 | 4 | 0 |
| Case 105 | 6 | 23,034,890 | 29,522,152 | 3 | 1 | 4 | 0 |
| Case 105 | 6 | 29,522,588 | 29,645,118 | 2 | 2 | 4 | 0 |
| Case 105 | 6 | 29,645,236 | 29,653,957 | 2 | 1 | 3 | 0 |
| Case 105 | 6 | 29,654,943 | 29,932,380 | 3 | 1 | 4 | 0 |
| Case 105 | 6 | 29,932,666 | 29,942,083 | 2 | 2 | 4 | 0 |
| Case 105 | 6 | 29,942,126 | 30,032,673 | 3 | 2 | 5 | 0 |
| Case 105 | 6 | 30,033,690 | 30,091,311 | 2 | 2 | 4 | 0 |
| Case 105 | 6 | 30,092,308 | 30,119,890 | 3 | 2 | 5 | 0 |
| Case 105 | 6 | 30,120,268 | 30,169,327 | 2 | 2 | 4 | 0 |
| Case 105 | 6 | 30,170,057 | 30,296,071 | 3 | 2 | 5 | 0 |
| Case 105 | 6 | 30,296,253 | 30,335,350 | 2 | 2 | 4 | 0 |
| Case 105 | 6 | 30,335,554 | 30,383,956 | 3 | 2 | 5 | 0 |
| Case 105 | 6 | 30,384,322 | 30,405,956 | 2 | 2 | 4 | 0 |
| Case 105 | 6 | 30,406,608 | 30,408,265 | 2 | 1 | 3 | 0 |
| Case 105 | 6 | 30,408,787 | 30,940,989 | 3 | 1 | 4 | 0 |
| Case 105 | 6 | 30,942,284 | 30,978,196 | 3 | 2 | 5 | 0 |
| Case 105 | 6 | 30,978,717 | 30,992,346 | 2 | 2 | 4 | 0 |
| Case 105 | 6 | 30,993,377 | 31,000,489 | 2 | 1 | 3 | 0 |
| Case 105 | 6 | 31,001,355 | 31,218,984 | 3 | 1 | 4 | 0 |
| Case 105 | 6 | 31,219,869 | 31,221,914 | 1 | 1 | 2 | 0 |
| Case 105 | 6 | 31,230,701 | 31,918,468 | 3 | 1 | 4 | 0 |
| Case 105 | 6 | 31,918,860 | 32,213,052 | 2 | 2 | 4 | 0 |
| Case 105 | 6 | 32,213,210 | 32,357,133 | 3 | 2 | 5 | 0 |
| Case 105 | 6 | 32,357,165 | 32,393,141 | 2 | 2 | 4 | 0 |
| Case 105 | 6 | 32,393,651 | 32,418,031 | 3 | 2 | 5 | 0 |
| Case 105 | 6 | 32,418,848 | 32,421,798 | 2 | 2 | 4 | 0 |
| Case 105 | 6 | 32,423,021 | 32,629,755 | 3 | 1 | 4 | 0 |
| Case 105 | 6 | 32,629,764 | 32,671,521 | 2 | 2 | 4 | 0 |
| Case 105 | 6 | 32,672,082 | 32,776,976 | 3 | 2 | 5 | 0 |
| Case 105 | 6 | 32,777,140 | 32,978,627 | 2 | 2 | 4 | 0 |
| Case 105 | 6 | 32,978,997 | 33,036,446 | 3 | 2 | 5 | 0 |
| Case 105 | 6 | 33,036,505 | 33,037,060 | 2 | 2 | 4 | 0 |
| Case 105 | 6 | 33,037,419 | 33,037,611 | 2 | 1 | 3 | 0 |
| Case 105 | 6 | 33,037,619 | 33,864,237 | 3 | 1 | 4 | 0 |
| Case 105 | 6 | 33,864,354 | 34,886,436 | 2 | 2 | 4 | 0 |
| Case 105 | 6 | 34,898,455 | 35,000,453 | 2 | 1 | 3 | 0 |
| Case 105 | 6 | 35,000,663 | 39,091,869 | 3 | 1 | 4 | 0 |
| Case 105 | 6 | 39,092,967 | 39,512,337 | 2 | 2 | 4 | 0 |
| Case 105 | 6 | 39,513,399 | 39,643,607 | 3 | 2 | 5 | 0 |
| Case 105 | 6 | 39,648,685 | 40,128,253 | 2 | 2 | 4 | 0 |
| Case 105 | 6 | 40,132,914 | 40,168,513 | 2 | 1 | 3 | 0 |
| Case 105 | 6 | 40,172,340 | 40,631,065 | 3 | 1 | 4 | 0 |
| Case 105 | 6 | 40,634,681 | 44,943,982 | 7 | 0 | 7 | 1 |
| Case 105 | 6 | 44,944,642 | 45,468,074 | 4 | 1 | 5 | 0 |
| Case 105 | 6 | 45,480,010 | 45,917,083 | 3 | 1 | 4 | 0 |
| Case 105 | 6 | 45,918,969 | 46,867,766 | 4 | 1 | 5 | 0 |



|          |   |             |             |   |   |   |   |
|----------|---|-------------|-------------|---|---|---|---|
| Case 105 | 6 | 46,867,767  | 47,311,898  | 3 | 1 | 4 | 0 |
| Case 105 | 6 | 47,312,531  | 47,681,981  | 3 | 2 | 5 | 0 |
| Case 105 | 6 | 47,681,990  | 47,682,206  | 2 | 2 | 4 | 0 |
| Case 105 | 6 | 47,682,212  | 47,682,501  | 2 | 1 | 3 | 0 |
| Case 105 | 6 | 47,682,519  | 51,435,724  | 4 | 1 | 5 | 0 |
| Case 105 | 6 | 51,436,530  | 53,663,882  | 3 | 1 | 4 | 0 |
| Case 105 | 6 | 53,664,707  | 56,044,835  | 4 | 1 | 5 | 0 |
| Case 105 | 6 | 56,047,400  | 58,752,089  | 3 | 1 | 4 | 0 |
| Case 105 | 6 | 61,891,118  | 62,786,386  | 3 | 1 | 4 | 0 |
| Case 105 | 6 | 62,792,379  | 62,809,771  | 3 | 2 | 5 | 0 |
| Case 105 | 6 | 62,819,058  | 65,759,576  | 2 | 2 | 4 | 0 |
| Case 105 | 6 | 65,760,202  | 66,005,857  | 2 | 1 | 3 | 0 |
| Case 105 | 6 | 66,005,888  | 67,529,319  | 2 | 2 | 4 | 0 |
| Case 105 | 6 | 67,535,530  | 68,697,160  | 2 | 1 | 3 | 0 |
| Case 105 | 6 | 68,699,843  | 69,818,593  | 2 | 2 | 4 | 0 |
| Case 105 | 6 | 69,826,507  | 70,610,207  | 2 | 1 | 3 | 0 |
| Case 105 | 6 | 70,612,132  | 72,437,006  | 2 | 2 | 4 | 0 |
| Case 105 | 6 | 72,437,128  | 73,234,957  | 2 | 1 | 3 | 0 |
| Case 105 | 6 | 73,237,751  | 76,469,115  | 2 | 2 | 4 | 0 |
| Case 105 | 6 | 76,481,902  | 77,422,929  | 2 | 1 | 3 | 0 |
| Case 105 | 6 | 77,424,462  | 79,483,130  | 2 | 2 | 4 | 0 |
| Case 105 | 6 | 79,483,474  | 80,079,559  | 2 | 1 | 3 | 0 |
| Case 105 | 6 | 80,082,927  | 80,618,523  | 2 | 2 | 4 | 0 |
| Case 105 | 6 | 80,623,610  | 80,750,397  | 2 | 1 | 3 | 0 |
| Case 105 | 6 | 80,751,942  | 82,778,549  | 2 | 2 | 4 | 0 |
| Case 105 | 6 | 82,780,595  | 83,074,954  | 2 | 1 | 3 | 0 |
| Case 105 | 6 | 83,075,231  | 83,582,258  | 2 | 2 | 4 | 0 |
| Case 105 | 6 | 83,584,304  | 84,075,136  | 2 | 1 | 3 | 0 |
| Case 105 | 6 | 84,081,971  | 88,067,157  | 2 | 2 | 4 | 0 |
| Case 105 | 6 | 88,074,792  | 88,453,491  | 2 | 1 | 3 | 0 |
| Case 105 | 6 | 88,455,481  | 90,311,213  | 2 | 2 | 4 | 0 |
| Case 105 | 6 | 90,312,803  | 90,713,018  | 2 | 1 | 3 | 0 |
| Case 105 | 6 | 90,714,054  | 91,841,370  | 2 | 2 | 4 | 0 |
| Case 105 | 6 | 91,841,769  | 92,229,590  | 2 | 1 | 3 | 0 |
| Case 105 | 6 | 92,233,404  | 93,921,556  | 2 | 2 | 4 | 0 |
| Case 105 | 6 | 93,922,926  | 95,951,267  | 2 | 1 | 3 | 0 |
| Case 105 | 6 | 95,952,089  | 96,956,097  | 2 | 2 | 4 | 0 |
| Case 105 | 6 | 96,969,694  | 98,044,632  | 2 | 1 | 3 | 0 |
| Case 105 | 6 | 98,066,596  | 98,798,280  | 2 | 2 | 4 | 0 |
| Case 105 | 6 | 98,819,800  | 99,464,542  | 2 | 1 | 3 | 0 |
| Case 105 | 6 | 99,467,661  | 102,008,823 | 2 | 2 | 4 | 0 |
| Case 105 | 6 | 102,017,666 | 104,817,775 | 2 | 1 | 3 | 0 |
| Case 105 | 6 | 104,820,636 | 109,752,451 | 2 | 2 | 4 | 0 |
| Case 105 | 6 | 109,752,549 | 109,802,929 | 2 | 1 | 3 | 0 |
| Case 105 | 6 | 109,803,216 | 110,690,440 | 2 | 2 | 4 | 0 |
| Case 105 | 6 | 110,692,360 | 110,889,435 | 2 | 1 | 3 | 0 |
| Case 105 | 6 | 110,889,538 | 111,393,061 | 2 | 2 | 4 | 0 |
| Case 105 | 6 | 111,394,421 | 112,479,963 | 2 | 1 | 3 | 0 |
| Case 105 | 6 | 112,480,041 | 113,910,697 | 2 | 2 | 4 | 0 |
| Case 105 | 6 | 113,920,304 | 114,751,611 | 2 | 1 | 3 | 0 |
| Case 105 | 6 | 114,762,507 | 116,546,924 | 2 | 2 | 4 | 0 |
| Case 105 | 6 | 116,559,406 | 117,053,071 | 2 | 1 | 3 | 0 |
| Case 105 | 6 | 117,055,764 | 118,612,943 | 2 | 2 | 4 | 0 |
| Case 105 | 6 | 118,613,435 | 120,148,300 | 2 | 1 | 3 | 0 |
| Case 105 | 6 | 120,154,449 | 121,526,898 | 2 | 2 | 4 | 0 |
| Case 105 | 6 | 121,542,358 | 122,333,898 | 2 | 1 | 3 | 0 |
| Case 105 | 6 | 122,336,960 | 123,059,586 | 2 | 2 | 4 | 0 |
| Case 105 | 6 | 123,071,112 | 123,206,331 | 2 | 1 | 3 | 0 |
| Case 105 | 6 | 123,209,819 | 125,672,037 | 2 | 2 | 4 | 0 |
| Case 105 | 6 | 125,673,963 | 127,768,762 | 2 | 1 | 3 | 0 |
| Case 105 | 6 | 127,770,982 | 131,563,577 | 2 | 2 | 4 | 0 |

|          |   |             |             |   |   |   |   |
|----------|---|-------------|-------------|---|---|---|---|
| Case 105 | 6 | 131,573,433 | 132,051,395 | 2 | 1 | 3 | 0 |
| Case 105 | 6 | 132,053,152 | 135,233,909 | 2 | 2 | 4 | 0 |
| Case 105 | 6 | 135,235,534 | 137,338,225 | 2 | 1 | 3 | 0 |
| Case 105 | 6 | 137,341,012 | 138,634,579 | 2 | 2 | 4 | 0 |
| Case 105 | 6 | 138,638,442 | 138,754,715 | 2 | 1 | 3 | 0 |
| Case 105 | 6 | 138,763,236 | 143,332,882 | 2 | 2 | 4 | 0 |
| Case 105 | 6 | 143,333,317 | 143,654,625 | 2 | 1 | 3 | 0 |
| Case 105 | 6 | 143,657,292 | 144,632,427 | 2 | 2 | 4 | 0 |
| Case 105 | 6 | 144,633,601 | 145,286,368 | 2 | 1 | 3 | 0 |
| Case 105 | 6 | 145,287,366 | 148,103,855 | 2 | 2 | 4 | 0 |
| Case 105 | 6 | 148,105,936 | 149,120,342 | 2 | 1 | 3 | 0 |
| Case 105 | 6 | 149,122,761 | 149,693,784 | 2 | 2 | 4 | 0 |
| Case 105 | 6 | 149,699,523 | 149,918,301 | 2 | 1 | 3 | 0 |
| Case 105 | 6 | 149,918,748 | 150,637,115 | 2 | 2 | 4 | 0 |
| Case 105 | 6 | 150,637,477 | 150,790,679 | 2 | 1 | 3 | 0 |
| Case 105 | 6 | 150,792,757 | 151,151,811 | 2 | 2 | 4 | 0 |
| Case 105 | 6 | 151,151,896 | 151,327,946 | 2 | 1 | 3 | 0 |
| Case 105 | 6 | 151,328,122 | 151,572,523 | 2 | 2 | 4 | 0 |
| Case 105 | 6 | 151,575,250 | 152,276,923 | 2 | 1 | 3 | 0 |
| Case 105 | 6 | 152,279,514 | 152,453,094 | 2 | 2 | 4 | 0 |
| Case 105 | 6 | 152,453,258 | 152,760,812 | 2 | 1 | 3 | 0 |
| Case 105 | 6 | 152,762,098 | 154,323,909 | 2 | 2 | 4 | 0 |
| Case 105 | 6 | 154,326,053 | 154,669,628 | 2 | 1 | 3 | 0 |
| Case 105 | 6 | 154,669,917 | 155,012,313 | 2 | 2 | 4 | 0 |
| Case 105 | 6 | 155,019,223 | 155,329,941 | 2 | 1 | 3 | 0 |
| Case 105 | 6 | 155,330,107 | 155,442,052 | 2 | 2 | 4 | 0 |
| Case 105 | 6 | 155,444,724 | 155,618,218 | 2 | 1 | 3 | 0 |
| Case 105 | 6 | 155,618,223 | 157,466,966 | 2 | 2 | 4 | 0 |
| Case 105 | 6 | 157,488,190 | 157,865,334 | 2 | 1 | 3 | 0 |
| Case 105 | 6 | 157,868,141 | 158,863,830 | 2 | 2 | 4 | 0 |
| Case 105 | 6 | 158,870,081 | 159,735,578 | 2 | 1 | 3 | 0 |
| Case 105 | 6 | 159,737,086 | 159,944,996 | 2 | 2 | 4 | 0 |
| Case 105 | 6 | 159,946,240 | 160,465,291 | 2 | 1 | 3 | 0 |
| Case 105 | 6 | 160,465,753 | 160,583,732 | 2 | 2 | 4 | 0 |
| Case 105 | 6 | 160,583,904 | 160,681,831 | 2 | 1 | 3 | 0 |
| Case 105 | 6 | 160,682,106 | 160,892,241 | 2 | 2 | 4 | 0 |
| Case 105 | 6 | 160,896,431 | 161,909,253 | 2 | 1 | 3 | 0 |
| Case 105 | 6 | 161,909,909 | 162,248,169 | 2 | 2 | 4 | 0 |
| Case 105 | 6 | 162,250,522 | 162,559,158 | 2 | 1 | 3 | 0 |
| Case 105 | 6 | 162,559,180 | 162,912,514 | 2 | 2 | 4 | 0 |
| Case 105 | 6 | 162,914,986 | 163,623,619 | 2 | 1 | 3 | 0 |
| Case 105 | 6 | 163,623,703 | 165,606,180 | 2 | 2 | 4 | 0 |
| Case 105 | 6 | 165,609,467 | 165,849,238 | 2 | 1 | 3 | 0 |
| Case 105 | 6 | 165,850,480 | 166,376,825 | 2 | 2 | 4 | 0 |
| Case 105 | 6 | 166,379,282 | 166,916,557 | 2 | 1 | 3 | 0 |
| Case 105 | 6 | 166,917,844 | 167,549,536 | 2 | 2 | 4 | 0 |
| Case 105 | 6 | 167,549,755 | 168,265,340 | 2 | 1 | 3 | 0 |
| Case 105 | 6 | 168,272,985 | 168,410,722 | 2 | 2 | 4 | 0 |
| Case 105 | 6 | 168,413,195 | 168,550,184 | 2 | 1 | 3 | 0 |
| Case 105 | 6 | 168,552,065 | 169,626,065 | 2 | 2 | 4 | 0 |
| Case 105 | 6 | 169,626,325 | 170,760,613 | 2 | 1 | 3 | 0 |
| Case 105 | 6 | 170,765,619 | 170,980,171 | 2 | 2 | 4 | 0 |
| Case 105 | 7 | 44,935      | 1,614,662   | 3 | 1 | 4 | 0 |
| Case 105 | 7 | 1,620,592   | 1,851,461   | 4 | 1 | 5 | 0 |
| Case 105 | 7 | 1,854,263   | 3,086,236   | 3 | 1 | 4 | 0 |
| Case 105 | 7 | 3,087,086   | 3,284,594   | 4 | 1 | 5 | 0 |
| Case 105 | 7 | 3,285,433   | 4,339,768   | 3 | 1 | 4 | 0 |
| Case 105 | 7 | 4,349,949   | 4,667,201   | 4 | 1 | 5 | 0 |
| Case 105 | 7 | 4,686,519   | 6,744,957   | 3 | 1 | 4 | 0 |
| Case 105 | 7 | 6,746,738   | 11,022,230  | 4 | 1 | 5 | 0 |
| Case 105 | 7 | 11,022,455  | 11,630,258  | 3 | 1 | 4 | 0 |

|          |   |             |             |   |   |   |   |
|----------|---|-------------|-------------|---|---|---|---|
| Case 105 | 7 | 11,630,298  | 20,769,733  | 4 | 1 | 5 | 0 |
| Case 105 | 7 | 20,771,341  | 21,053,970  | 3 | 1 | 4 | 0 |
| Case 105 | 7 | 21,057,266  | 21,775,396  | 4 | 1 | 5 | 0 |
| Case 105 | 7 | 21,775,443  | 21,939,698  | 3 | 1 | 4 | 0 |
| Case 105 | 7 | 21,940,626  | 24,269,523  | 4 | 1 | 5 | 0 |
| Case 105 | 7 | 24,273,131  | 24,893,147  | 3 | 1 | 4 | 0 |
| Case 105 | 7 | 24,894,255  | 25,676,320  | 4 | 1 | 5 | 0 |
| Case 105 | 7 | 25,676,557  | 26,035,630  | 3 | 1 | 4 | 0 |
| Case 105 | 7 | 26,038,458  | 26,447,021  | 4 | 1 | 5 | 0 |
| Case 105 | 7 | 26,450,219  | 27,336,745  | 3 | 1 | 4 | 0 |
| Case 105 | 7 | 27,339,901  | 29,152,371  | 4 | 1 | 5 | 0 |
| Case 105 | 7 | 29,152,397  | 29,244,759  | 3 | 1 | 4 | 0 |
| Case 105 | 7 | 29,247,409  | 29,514,059  | 4 | 1 | 5 | 0 |
| Case 105 | 7 | 29,517,436  | 29,597,799  | 3 | 1 | 4 | 0 |
| Case 105 | 7 | 29,601,142  | 29,966,085  | 4 | 1 | 5 | 0 |
| Case 105 | 7 | 29,966,141  | 30,494,924  | 3 | 1 | 4 | 0 |
| Case 105 | 7 | 30,496,374  | 30,625,161  | 4 | 1 | 5 | 0 |
| Case 105 | 7 | 30,634,548  | 30,881,749  | 3 | 1 | 4 | 0 |
| Case 105 | 7 | 30,884,273  | 31,594,508  | 4 | 1 | 5 | 0 |
| Case 105 | 7 | 31,607,134  | 31,720,475  | 3 | 1 | 4 | 0 |
| Case 105 | 7 | 31,725,977  | 32,399,833  | 4 | 1 | 5 | 0 |
| Case 105 | 7 | 32,401,341  | 33,526,293  | 3 | 1 | 4 | 0 |
| Case 105 | 7 | 33,536,947  | 34,121,829  | 4 | 1 | 5 | 0 |
| Case 105 | 7 | 34,125,410  | 34,174,173  | 3 | 1 | 4 | 0 |
| Case 105 | 7 | 34,178,283  | 34,872,332  | 4 | 1 | 5 | 0 |
| Case 105 | 7 | 34,873,320  | 35,568,863  | 3 | 1 | 4 | 0 |
| Case 105 | 7 | 35,572,626  | 35,928,645  | 4 | 1 | 5 | 0 |
| Case 105 | 7 | 35,949,318  | 36,588,239  | 3 | 1 | 4 | 0 |
| Case 105 | 7 | 36,588,255  | 37,951,097  | 4 | 1 | 5 | 0 |
| Case 105 | 7 | 37,951,231  | 38,157,881  | 3 | 1 | 4 | 0 |
| Case 105 | 7 | 38,159,445  | 38,695,584  | 4 | 1 | 5 | 0 |
| Case 105 | 7 | 38,706,384  | 39,292,111  | 3 | 1 | 4 | 0 |
| Case 105 | 7 | 39,297,668  | 40,039,615  | 4 | 1 | 5 | 0 |
| Case 105 | 7 | 40,054,784  | 41,519,812  | 3 | 1 | 4 | 0 |
| Case 105 | 7 | 41,524,795  | 44,457,299  | 4 | 0 | 4 | 1 |
| Case 105 | 7 | 44,466,729  | 44,784,697  | 3 | 0 | 3 | 1 |
| Case 105 | 7 | 44,790,988  | 56,136,277  | 4 | 0 | 4 | 1 |
| Case 105 | 7 | 56,140,618  | 56,573,333  | 3 | 0 | 3 | 1 |
| Case 105 | 7 | 56,588,724  | 57,488,782  | 4 | 0 | 4 | 1 |
| Case 105 | 7 | 57,491,887  | 58,019,061  | 3 | 0 | 3 | 1 |
| Case 105 | 7 | 61,056,053  | 62,935,337  | 3 | 0 | 3 | 1 |
| Case 105 | 7 | 62,985,573  | 70,183,274  | 2 | 0 | 2 | 1 |
| Case 105 | 7 | 70,184,785  | 70,254,788  | 3 | 0 | 3 | 1 |
| Case 105 | 7 | 70,254,801  | 94,927,242  | 2 | 0 | 2 | 1 |
| Case 105 | 7 | 94,927,495  | 94,948,841  | 3 | 0 | 3 | 1 |
| Case 105 | 7 | 94,949,537  | 95,036,992  | 2 | 0 | 2 | 1 |
| Case 105 | 7 | 95,037,661  | 95,174,427  | 3 | 0 | 3 | 1 |
| Case 105 | 7 | 95,183,373  | 131,195,712 | 2 | 0 | 2 | 1 |
| Case 105 | 7 | 131,195,757 | 131,856,536 | 3 | 0 | 3 | 1 |
| Case 105 | 7 | 131,857,841 | 142,007,325 | 2 | 0 | 2 | 1 |
| Case 105 | 7 | 142,010,982 | 142,493,129 | 3 | 0 | 3 | 1 |
| Case 105 | 7 | 142,496,293 | 159,119,486 | 2 | 0 | 2 | 1 |
| Case 105 | 8 | 164,984     | 6,430,269   | 1 | 0 | 1 | 0 |
| Case 105 | 8 | 6,431,666   | 7,308,659   | 2 | 0 | 2 | 1 |
| Case 105 | 8 | 7,308,674   | 7,308,691   | 4 | 1 | 5 | 0 |
| Case 105 | 8 | 7,308,718   | 7,308,718   | 2 | 1 | 3 | 0 |
| Case 105 | 8 | 7,371,590   | 8,094,406   | 1 | 1 | 2 | 0 |
| Case 105 | 8 | 8,101,641   | 8,994,512   | 1 | 0 | 1 | 0 |
| Case 105 | 8 | 8,995,166   | 15,190,987  | 2 | 0 | 2 | 1 |
| Case 105 | 8 | 15,191,015  | 15,324,559  | 3 | 0 | 3 | 1 |
| Case 105 | 8 | 15,327,144  | 16,632,702  | 2 | 0 | 2 | 1 |

|          |    |             |             |   |   |   |   |
|----------|----|-------------|-------------|---|---|---|---|
| Case 105 | 8  | 16,634,751  | 16,850,601  | 3 | 0 | 3 | 1 |
| Case 105 | 8  | 16,850,694  | 17,405,336  | 2 | 0 | 2 | 1 |
| Case 105 | 8  | 17,406,183  | 17,563,896  | 3 | 0 | 3 | 1 |
| Case 105 | 8  | 17,564,973  | 19,145,032  | 2 | 0 | 2 | 1 |
| Case 105 | 8  | 19,145,800  | 19,419,494  | 3 | 0 | 3 | 1 |
| Case 105 | 8  | 19,429,049  | 23,397,750  | 2 | 0 | 2 | 1 |
| Case 105 | 8  | 23,402,070  | 23,703,716  | 3 | 0 | 3 | 1 |
| Case 105 | 8  | 23,708,887  | 25,748,695  | 2 | 0 | 2 | 1 |
| Case 105 | 8  | 25,752,705  | 26,043,064  | 3 | 0 | 3 | 1 |
| Case 105 | 8  | 26,044,276  | 26,893,734  | 2 | 0 | 2 | 1 |
| Case 105 | 8  | 26,894,544  | 27,625,201  | 3 | 0 | 3 | 1 |
| Case 105 | 8  | 27,628,886  | 29,124,351  | 2 | 0 | 2 | 1 |
| Case 105 | 8  | 29,140,616  | 29,473,431  | 3 | 0 | 3 | 1 |
| Case 105 | 8  | 29,478,948  | 37,098,052  | 2 | 0 | 2 | 1 |
| Case 105 | 8  | 37,100,928  | 37,381,976  | 3 | 0 | 3 | 1 |
| Case 105 | 8  | 37,390,375  | 38,135,412  | 2 | 0 | 2 | 1 |
| Case 105 | 8  | 38,139,034  | 38,966,013  | 4 | 1 | 5 | 0 |
| Case 105 | 8  | 38,968,798  | 38,975,368  | 3 | 1 | 4 | 0 |
| Case 105 | 8  | 38,989,813  | 40,065,457  | 4 | 2 | 6 | 0 |
| Case 105 | 8  | 40,065,987  | 42,413,943  | 2 | 2 | 4 | 0 |
| Case 105 | 8  | 42,414,226  | 43,791,691  | 3 | 2 | 5 | 0 |
| Case 105 | 8  | 46,886,735  | 48,172,962  | 3 | 2 | 5 | 0 |
| Case 105 | 8  | 48,177,501  | 51,543,713  | 2 | 2 | 4 | 0 |
| Case 105 | 8  | 51,546,026  | 51,981,777  | 3 | 2 | 5 | 0 |
| Case 105 | 8  | 51,982,333  | 52,504,488  | 2 | 2 | 4 | 0 |
| Case 105 | 8  | 52,505,214  | 53,001,694  | 3 | 2 | 5 | 0 |
| Case 105 | 8  | 53,006,766  | 54,493,000  | 2 | 2 | 4 | 0 |
| Case 105 | 8  | 54,495,355  | 54,651,177  | 3 | 2 | 5 | 0 |
| Case 105 | 8  | 54,651,305  | 57,839,087  | 2 | 2 | 4 | 0 |
| Case 105 | 8  | 57,841,969  | 58,835,639  | 3 | 2 | 5 | 0 |
| Case 105 | 8  | 58,837,634  | 59,766,131  | 2 | 2 | 4 | 0 |
| Case 105 | 8  | 59,766,309  | 60,022,497  | 3 | 2 | 5 | 0 |
| Case 105 | 8  | 60,024,449  | 60,388,601  | 2 | 2 | 4 | 0 |
| Case 105 | 8  | 60,398,832  | 70,188,775  | 2 | 1 | 3 | 0 |
| Case 105 | 8  | 70,198,662  | 89,536,805  | 3 | 1 | 4 | 0 |
| Case 105 | 8  | 89,554,072  | 93,942,913  | 3 | 2 | 5 | 0 |
| Case 105 | 8  | 93,977,130  | 95,272,620  | 2 | 2 | 4 | 0 |
| Case 105 | 8  | 95,274,016  | 96,139,617  | 3 | 2 | 5 | 0 |
| Case 105 | 8  | 96,139,702  | 96,452,309  | 2 | 2 | 4 | 0 |
| Case 105 | 8  | 96,452,712  | 97,060,715  | 3 | 2 | 5 | 0 |
| Case 105 | 8  | 97,063,942  | 98,582,908  | 2 | 2 | 4 | 0 |
| Case 105 | 8  | 98,583,425  | 98,900,369  | 3 | 2 | 5 | 0 |
| Case 105 | 8  | 98,900,405  | 99,030,718  | 2 | 2 | 4 | 0 |
| Case 105 | 8  | 99,033,441  | 107,355,371 | 3 | 2 | 5 | 0 |
| Case 105 | 8  | 107,372,260 | 115,603,659 | 3 | 3 | 6 | 0 |
| Case 105 | 8  | 115,611,596 | 115,626,102 | 4 | 2 | 6 | 0 |
| Case 105 | 8  | 115,641,238 | 115,641,882 | 2 | 0 | 2 | 1 |
| Case 105 | 8  | 115,642,408 | 115,642,408 | 2 | 2 | 4 | 0 |
| Case 105 | 8  | 115,650,409 | 129,746,895 | 3 | 2 | 5 | 0 |
| Case 105 | 8  | 129,748,718 | 146,293,414 | 3 | 3 | 6 | 0 |
| Case 105 | 9  | 46,587      | 19,942,824  | 1 | 1 | 2 | 0 |
| Case 105 | 9  | 19,946,627  | 30,679,704  | 3 | 1 | 4 | 0 |
| Case 105 | 9  | 30,687,072  | 31,262,671  | 2 | 1 | 3 | 0 |
| Case 105 | 9  | 31,263,902  | 32,381,785  | 3 | 1 | 4 | 0 |
| Case 105 | 9  | 32,381,910  | 46,944,322  | 2 | 1 | 3 | 0 |
| Case 105 | 9  | 65,629,772  | 140,218,212 | 2 | 1 | 3 | 0 |
| Case 105 | 9  | 140,218,283 | 140,268,976 | 1 | 1 | 2 | 0 |
| Case 105 | 9  | 140,271,414 | 141,066,491 | 2 | 1 | 3 | 0 |
| Case 105 | 10 | 98,087      | 11,433,996  | 3 | 0 | 3 | 1 |
| Case 105 | 10 | 11,438,205  | 22,193,508  | 4 | 0 | 4 | 1 |
| Case 105 | 10 | 22,209,221  | 39,097,912  | 3 | 0 | 3 | 1 |

|          |    |             |             |   |   |   |   |
|----------|----|-------------|-------------|---|---|---|---|
| Case 105 | 10 | 42,436,301  | 60,581,614  | 2 | 0 | 2 | 1 |
| Case 105 | 10 | 60,585,616  | 61,022,253  | 3 | 0 | 3 | 1 |
| Case 105 | 10 | 61,022,303  | 71,577,422  | 2 | 0 | 2 | 1 |
| Case 105 | 10 | 71,577,541  | 71,677,052  | 3 | 0 | 3 | 1 |
| Case 105 | 10 | 71,678,045  | 77,073,351  | 2 | 0 | 2 | 1 |
| Case 105 | 10 | 77,081,848  | 77,529,032  | 3 | 0 | 3 | 1 |
| Case 105 | 10 | 77,529,218  | 114,992,431 | 2 | 0 | 2 | 1 |
| Case 105 | 10 | 115,000,814 | 115,471,016 | 3 | 0 | 3 | 1 |
| Case 105 | 10 | 115,478,677 | 117,728,741 | 2 | 0 | 2 | 1 |
| Case 105 | 10 | 117,729,114 | 135,477,883 | 3 | 0 | 3 | 1 |
| Case 105 | 11 | 193,146     | 20,676,316  | 1 | 1 | 2 | 0 |
| Case 105 | 11 | 20,676,319  | 51,391,587  | 2 | 1 | 3 | 0 |
| Case 105 | 11 | 51,392,716  | 51,591,253  | 3 | 1 | 4 | 0 |
| Case 105 | 11 | 54,794,237  | 57,062,509  | 3 | 1 | 4 | 0 |
| Case 105 | 11 | 57,065,220  | 57,488,160  | 2 | 1 | 3 | 0 |
| Case 105 | 11 | 57,496,820  | 60,482,542  | 3 | 1 | 4 | 0 |
| Case 105 | 11 | 60,483,131  | 60,723,898  | 2 | 1 | 3 | 0 |
| Case 105 | 11 | 60,725,609  | 61,018,642  | 3 | 1 | 4 | 0 |
| Case 105 | 11 | 61,023,970  | 61,643,327  | 2 | 1 | 3 | 0 |
| Case 105 | 11 | 61,643,641  | 62,259,222  | 3 | 1 | 4 | 0 |
| Case 105 | 11 | 62,269,774  | 62,766,540  | 2 | 1 | 3 | 0 |
| Case 105 | 11 | 62,766,561  | 63,485,571  | 3 | 1 | 4 | 0 |
| Case 105 | 11 | 63,486,284  | 63,744,152  | 2 | 1 | 3 | 0 |
| Case 105 | 11 | 63,761,169  | 63,883,803  | 3 | 1 | 4 | 0 |
| Case 105 | 11 | 63,883,825  | 64,179,813  | 2 | 1 | 3 | 0 |
| Case 105 | 11 | 64,184,104  | 64,345,448  | 3 | 1 | 4 | 0 |
| Case 105 | 11 | 64,351,721  | 64,813,504  | 3 | 0 | 3 | 1 |
| Case 105 | 11 | 64,813,685  | 65,303,785  | 3 | 1 | 4 | 0 |
| Case 105 | 11 | 65,304,520  | 65,423,327  | 2 | 1 | 3 | 0 |
| Case 105 | 11 | 65,423,347  | 65,617,324  | 3 | 1 | 4 | 0 |
| Case 105 | 11 | 65,617,501  | 65,793,685  | 2 | 1 | 3 | 0 |
| Case 105 | 11 | 65,793,703  | 67,789,327  | 3 | 1 | 4 | 0 |
| Case 105 | 11 | 67,789,553  | 67,918,678  | 4 | 1 | 5 | 0 |
| Case 105 | 11 | 67,925,546  | 68,854,029  | 3 | 1 | 4 | 0 |
| Case 105 | 11 | 68,854,047  | 69,058,291  | 4 | 1 | 5 | 0 |
| Case 105 | 11 | 69,060,814  | 69,592,664  | 3 | 1 | 4 | 0 |
| Case 105 | 11 | 69,592,814  | 69,941,786  | 4 | 1 | 5 | 0 |
| Case 105 | 11 | 69,942,324  | 71,221,574  | 3 | 1 | 4 | 0 |
| Case 105 | 11 | 71,231,233  | 71,707,489  | 4 | 1 | 5 | 0 |
| Case 105 | 11 | 71,709,724  | 73,997,030  | 3 | 1 | 4 | 0 |
| Case 105 | 11 | 73,997,310  | 74,393,938  | 4 | 1 | 5 | 0 |
| Case 105 | 11 | 74,394,015  | 74,746,631  | 3 | 1 | 4 | 0 |
| Case 105 | 11 | 74,757,641  | 74,887,553  | 4 | 1 | 5 | 0 |
| Case 105 | 11 | 74,887,926  | 75,947,617  | 3 | 1 | 4 | 0 |
| Case 105 | 11 | 75,956,348  | 76,322,550  | 4 | 1 | 5 | 0 |
| Case 105 | 11 | 76,324,076  | 76,982,252  | 3 | 1 | 4 | 0 |
| Case 105 | 11 | 76,982,342  | 77,774,599  | 4 | 1 | 5 | 0 |
| Case 105 | 11 | 77,774,929  | 78,568,110  | 3 | 1 | 4 | 0 |
| Case 105 | 11 | 78,573,179  | 78,772,032  | 4 | 1 | 5 | 0 |
| Case 105 | 11 | 78,772,558  | 79,031,671  | 3 | 1 | 4 | 0 |
| Case 105 | 11 | 79,039,284  | 79,158,020  | 4 | 1 | 5 | 0 |
| Case 105 | 11 | 79,165,928  | 79,590,759  | 3 | 1 | 4 | 0 |
| Case 105 | 11 | 79,590,987  | 80,865,791  | 4 | 1 | 5 | 0 |
| Case 105 | 11 | 80,867,185  | 81,010,850  | 3 | 1 | 4 | 0 |
| Case 105 | 11 | 81,011,841  | 81,675,983  | 4 | 1 | 5 | 0 |
| Case 105 | 11 | 81,680,388  | 82,443,955  | 3 | 1 | 4 | 0 |
| Case 105 | 11 | 82,444,021  | 82,532,777  | 4 | 1 | 5 | 0 |
| Case 105 | 11 | 82,535,327  | 84,060,675  | 5 | 1 | 6 | 0 |
| Case 105 | 11 | 84,064,236  | 84,117,907  | 3 | 1 | 4 | 0 |
| Case 105 | 11 | 84,120,020  | 85,968,037  | 4 | 1 | 5 | 0 |
| Case 105 | 11 | 85,968,623  | 87,345,390  | 5 | 1 | 6 | 0 |

|          |    |             |             |   |   |   |   |
|----------|----|-------------|-------------|---|---|---|---|
| Case 105 | 11 | 87,349,407  | 87,439,615  | 3 | 1 | 4 | 0 |
| Case 105 | 11 | 87,440,486  | 87,440,486  | 4 | 1 | 5 | 0 |
| Case 105 | 11 | 87,447,212  | 88,650,737  | 6 | 0 | 6 | 1 |
| Case 105 | 11 | 88,658,385  | 88,658,385  | 3 | 1 | 4 | 0 |
| Case 105 | 11 | 88,661,444  | 89,404,829  | 7 | 0 | 7 | 1 |
| Case 105 | 11 | 89,405,190  | 118,764,419 | 3 | 1 | 4 | 0 |
| Case 105 | 11 | 118,764,497 | 119,460,505 | 2 | 1 | 3 | 0 |
| Case 105 | 11 | 119,465,669 | 123,775,491 | 3 | 1 | 4 | 0 |
| Case 105 | 11 | 123,775,759 | 124,266,877 | 3 | 0 | 3 | 1 |
| Case 105 | 11 | 124,267,132 | 124,481,720 | 3 | 1 | 4 | 0 |
| Case 105 | 11 | 124,482,903 | 124,972,832 | 2 | 1 | 3 | 0 |
| Case 105 | 11 | 124,974,940 | 126,135,224 | 3 | 1 | 4 | 0 |
| Case 105 | 11 | 126,135,259 | 126,208,232 | 2 | 1 | 3 | 0 |
| Case 105 | 11 | 126,208,378 | 134,934,063 | 3 | 1 | 4 | 0 |
| Case 105 | 12 | 191,619     | 34,340,168  | 3 | 0 | 3 | 1 |
| Case 105 | 12 | 34,362,752  | 34,853,011  | 2 | 0 | 2 | 1 |
| Case 105 | 12 | 37,876,400  | 38,528,487  | 2 | 0 | 2 | 1 |
| Case 105 | 12 | 38,529,491  | 55,042,039  | 3 | 0 | 3 | 1 |
| Case 105 | 12 | 55,042,807  | 56,693,981  | 4 | 0 | 4 | 1 |
| Case 105 | 12 | 56,699,623  | 56,995,907  | 3 | 0 | 3 | 1 |
| Case 105 | 12 | 56,996,002  | 57,849,921  | 4 | 0 | 4 | 1 |
| Case 105 | 12 | 57,849,931  | 58,062,667  | 3 | 0 | 3 | 1 |
| Case 105 | 12 | 58,069,107  | 61,034,074  | 2 | 0 | 2 | 1 |
| Case 105 | 12 | 61,049,683  | 133,810,935 | 3 | 0 | 3 | 1 |
| Case 105 | 13 | 19,058,717  | 24,104,388  | 2 | 1 | 3 | 0 |
| Case 105 | 13 | 24,108,468  | 24,108,468  | 4 | 1 | 5 | 0 |
| Case 105 | 13 | 24,115,563  | 24,734,112  | 5 | 1 | 6 | 0 |
| Case 105 | 13 | 24,736,246  | 24,741,868  | 3 | 1 | 4 | 0 |
| Case 105 | 13 | 24,742,169  | 29,979,193  | 5 | 0 | 5 | 1 |
| Case 105 | 13 | 29,984,937  | 30,102,167  | 4 | 1 | 5 | 0 |
| Case 105 | 13 | 30,102,673  | 31,174,248  | 5 | 1 | 6 | 0 |
| Case 105 | 13 | 31,177,774  | 31,484,608  | 4 | 1 | 5 | 0 |
| Case 105 | 13 | 31,485,741  | 32,313,822  | 5 | 1 | 6 | 0 |
| Case 105 | 13 | 32,319,994  | 35,290,618  | 4 | 1 | 5 | 0 |
| Case 105 | 13 | 35,293,236  | 36,006,414  | 5 | 1 | 6 | 0 |
| Case 105 | 13 | 36,006,522  | 36,011,882  | 3 | 1 | 4 | 0 |
| Case 105 | 13 | 36,014,991  | 46,190,337  | 4 | 1 | 5 | 0 |
| Case 105 | 13 | 46,215,347  | 73,290,464  | 1 | 1 | 2 | 0 |
| Case 105 | 13 | 73,292,244  | 80,273,590  | 4 | 1 | 5 | 0 |
| Case 105 | 13 | 80,276,438  | 82,819,766  | 5 | 1 | 6 | 0 |
| Case 105 | 13 | 82,843,205  | 82,869,170  | 3 | 1 | 4 | 0 |
| Case 105 | 13 | 82,869,193  | 84,591,862  | 4 | 1 | 5 | 0 |
| Case 105 | 13 | 84,606,422  | 96,915,624  | 3 | 1 | 4 | 0 |
| Case 105 | 13 | 96,923,659  | 103,862,936 | 1 | 1 | 2 | 0 |
| Case 105 | 13 | 103,865,749 | 105,275,930 | 3 | 1 | 4 | 0 |
| Case 105 | 13 | 105,279,219 | 108,469,995 | 1 | 1 | 2 | 0 |
| Case 105 | 13 | 108,470,487 | 115,103,529 | 2 | 1 | 3 | 0 |
| Case 105 | 14 | 19,280,733  | 20,425,051  | 2 | 1 | 3 | 0 |
| Case 105 | 14 | 20,426,742  | 22,410,026  | 2 | 2 | 4 | 0 |
| Case 105 | 14 | 22,411,348  | 22,953,495  | 3 | 2 | 5 | 0 |
| Case 105 | 14 | 22,953,607  | 84,963,074  | 2 | 2 | 4 | 0 |
| Case 105 | 14 | 84,973,292  | 86,164,512  | 2 | 1 | 3 | 0 |
| Case 105 | 14 | 86,167,611  | 87,029,965  | 2 | 2 | 4 | 0 |
| Case 105 | 14 | 87,031,156  | 95,116,292  | 2 | 1 | 3 | 0 |
| Case 105 | 14 | 95,116,465  | 95,363,904  | 2 | 2 | 4 | 0 |
| Case 105 | 14 | 95,364,090  | 96,016,064  | 2 | 1 | 3 | 0 |
| Case 105 | 14 | 96,016,792  | 96,422,745  | 2 | 2 | 4 | 0 |
| Case 105 | 14 | 96,425,780  | 99,197,274  | 2 | 1 | 3 | 0 |
| Case 105 | 14 | 99,198,268  | 99,474,098  | 2 | 2 | 4 | 0 |
| Case 105 | 14 | 99,474,165  | 107,287,663 | 2 | 1 | 3 | 0 |
| Case 105 | 15 | 20,034,919  | 20,612,840  | 4 | 1 | 5 | 0 |

|          |    |            |            |   |   |   |   |
|----------|----|------------|------------|---|---|---|---|
| Case 105 | 15 | 21,903,815 | 22,410,067 | 3 | 1 | 4 | 0 |
| Case 105 | 15 | 22,427,966 | 22,652,330 | 4 | 1 | 5 | 0 |
| Case 105 | 15 | 22,750,305 | 25,293,761 | 5 | 1 | 6 | 0 |
| Case 105 | 15 | 25,298,774 | 25,330,885 | 3 | 1 | 4 | 0 |
| Case 105 | 15 | 25,332,118 | 25,774,277 | 4 | 2 | 6 | 0 |
| Case 105 | 15 | 25,775,992 | 25,775,992 | 2 | 0 | 2 | 1 |
| Case 105 | 15 | 25,779,613 | 26,076,458 | 2 | 2 | 4 | 0 |
| Case 105 | 15 | 26,080,362 | 26,088,544 | 2 | 1 | 3 | 0 |
| Case 105 | 15 | 26,093,401 | 27,742,401 | 4 | 1 | 5 | 0 |
| Case 105 | 15 | 27,744,850 | 27,892,111 | 3 | 1 | 4 | 0 |
| Case 105 | 15 | 27,892,254 | 29,399,597 | 2 | 2 | 4 | 0 |
| Case 105 | 15 | 29,400,531 | 32,250,155 | 3 | 2 | 5 | 0 |
| Case 105 | 15 | 32,251,479 | 32,251,479 | 2 | 2 | 4 | 0 |
| Case 105 | 15 | 32,257,407 | 32,257,407 | 2 | 1 | 3 | 0 |
| Case 105 | 15 | 32,257,903 | 33,282,673 | 4 | 1 | 5 | 0 |
| Case 105 | 15 | 33,287,881 | 33,661,286 | 5 | 1 | 6 | 0 |
| Case 105 | 15 | 33,665,422 | 33,836,630 | 2 | 0 | 2 | 1 |
| Case 105 | 15 | 33,838,470 | 34,133,047 | 5 | 1 | 6 | 0 |
| Case 105 | 15 | 34,133,130 | 34,136,056 | 3 | 1 | 4 | 0 |
| Case 105 | 15 | 34,139,292 | 34,198,564 | 2 | 1 | 3 | 0 |
| Case 105 | 15 | 34,203,347 | 34,667,075 | 4 | 1 | 5 | 0 |
| Case 105 | 15 | 34,671,124 | 34,671,124 | 5 | 1 | 6 | 0 |
| Case 105 | 15 | 34,718,594 | 34,760,648 | 4 | 1 | 5 | 0 |
| Case 105 | 15 | 34,761,495 | 36,287,828 | 5 | 1 | 6 | 0 |
| Case 105 | 15 | 36,290,481 | 36,336,078 | 3 | 1 | 4 | 0 |
| Case 105 | 15 | 36,342,453 | 36,715,506 | 7 | 0 | 7 | 1 |
| Case 105 | 15 | 36,719,135 | 36,719,135 | 3 | 1 | 4 | 0 |
| Case 105 | 15 | 36,720,037 | 58,440,194 | 2 | 0 | 2 | 1 |
| Case 105 | 15 | 58,442,332 | 58,685,642 | 3 | 0 | 3 | 1 |
| Case 105 | 15 | 58,685,970 | 59,467,146 | 2 | 0 | 2 | 1 |
| Case 105 | 15 | 59,476,088 | 59,771,962 | 3 | 0 | 3 | 1 |
| Case 105 | 15 | 59,773,635 | 61,339,261 | 2 | 0 | 2 | 1 |
| Case 105 | 15 | 61,348,204 | 61,474,991 | 3 | 0 | 3 | 1 |
| Case 105 | 15 | 61,479,586 | 64,844,372 | 2 | 0 | 2 | 1 |
| Case 105 | 15 | 64,895,319 | 65,155,528 | 4 | 1 | 5 | 0 |
| Case 105 | 15 | 65,157,203 | 66,530,480 | 5 | 1 | 6 | 0 |
| Case 105 | 15 | 66,530,732 | 66,537,997 | 3 | 1 | 4 | 0 |
| Case 105 | 15 | 66,547,641 | 68,058,903 | 4 | 1 | 5 | 0 |
| Case 105 | 15 | 68,060,179 | 68,468,845 | 3 | 1 | 4 | 0 |
| Case 105 | 15 | 68,471,891 | 68,643,740 | 2 | 0 | 2 | 1 |
| Case 105 | 15 | 68,649,516 | 68,677,576 | 2 | 2 | 4 | 0 |
| Case 105 | 15 | 68,679,181 | 69,388,926 | 3 | 2 | 5 | 0 |
| Case 105 | 15 | 69,389,283 | 69,399,556 | 2 | 2 | 4 | 0 |
| Case 105 | 15 | 69,407,702 | 69,407,702 | 2 | 1 | 3 | 0 |
| Case 105 | 15 | 69,407,804 | 69,590,143 | 2 | 0 | 2 | 1 |
| Case 105 | 15 | 69,596,069 | 70,181,548 | 4 | 1 | 5 | 0 |
| Case 105 | 15 | 70,183,135 | 70,207,077 | 3 | 1 | 4 | 0 |
| Case 105 | 15 | 70,208,145 | 70,319,066 | 2 | 0 | 2 | 1 |
| Case 105 | 15 | 70,332,807 | 70,818,373 | 4 | 1 | 5 | 0 |
| Case 105 | 15 | 70,819,162 | 70,828,940 | 3 | 1 | 4 | 0 |
| Case 105 | 15 | 70,832,792 | 78,384,669 | 2 | 0 | 2 | 1 |
| Case 105 | 15 | 78,386,540 | 78,697,463 | 5 | 1 | 6 | 0 |
| Case 105 | 15 | 78,698,759 | 78,750,549 | 3 | 1 | 4 | 0 |
| Case 105 | 15 | 78,757,624 | 78,832,792 | 4 | 1 | 5 | 0 |
| Case 105 | 15 | 78,833,223 | 79,058,687 | 5 | 1 | 6 | 0 |
| Case 105 | 15 | 79,059,376 | 79,064,170 | 6 | 1 | 7 | 0 |
| Case 105 | 15 | 79,066,967 | 79,082,364 | 3 | 1 | 4 | 0 |
| Case 105 | 15 | 79,082,431 | 81,592,746 | 6 | 1 | 7 | 0 |
| Case 105 | 15 | 81,592,802 | 81,593,811 | 5 | 1 | 6 | 0 |
| Case 105 | 15 | 81,595,991 | 81,633,832 | 4 | 1 | 5 | 0 |
| Case 105 | 15 | 81,634,574 | 83,588,703 | 5 | 1 | 6 | 0 |

|          |    |             |             |   |   |   |   |
|----------|----|-------------|-------------|---|---|---|---|
| Case 105 | 15 | 83,588,895  | 83,588,895  | 7 | 0 | 7 | 1 |
| Case 105 | 15 | 83,603,563  | 83,611,095  | 3 | 1 | 4 | 0 |
| Case 105 | 15 | 83,615,274  | 84,019,603  | 7 | 0 | 7 | 1 |
| Case 105 | 15 | 84,041,308  | 84,166,601  | 4 | 1 | 5 | 0 |
| Case 105 | 15 | 84,167,184  | 85,142,647  | 5 | 1 | 6 | 0 |
| Case 105 | 15 | 85,143,277  | 85,147,499  | 3 | 1 | 4 | 0 |
| Case 105 | 15 | 85,149,771  | 85,494,062  | 4 | 1 | 5 | 0 |
| Case 105 | 15 | 85,494,147  | 86,273,886  | 5 | 1 | 6 | 0 |
| Case 105 | 15 | 86,278,309  | 86,288,387  | 3 | 1 | 4 | 0 |
| Case 105 | 15 | 86,288,596  | 87,014,969  | 4 | 1 | 5 | 0 |
| Case 105 | 15 | 87,027,314  | 91,395,711  | 5 | 1 | 6 | 0 |
| Case 105 | 15 | 91,404,788  | 91,416,550  | 3 | 1 | 4 | 0 |
| Case 105 | 15 | 91,416,605  | 91,596,901  | 4 | 1 | 5 | 0 |
| Case 105 | 15 | 91,599,600  | 92,517,358  | 5 | 1 | 6 | 0 |
| Case 105 | 15 | 92,518,451  | 92,520,524  | 3 | 1 | 4 | 0 |
| Case 105 | 15 | 92,522,306  | 96,276,516  | 6 | 1 | 7 | 0 |
| Case 105 | 15 | 96,283,395  | 96,307,034  | 4 | 1 | 5 | 0 |
| Case 105 | 15 | 96,307,358  | 98,253,294  | 5 | 1 | 6 | 0 |
| Case 105 | 15 | 98,253,818  | 98,253,818  | 3 | 1 | 4 | 0 |
| Case 105 | 15 | 98,255,991  | 100,512,047 | 6 | 1 | 7 | 0 |
| Case 105 | 15 | 100,513,707 | 100,516,256 | 4 | 1 | 5 | 0 |
| Case 105 | 15 | 100,516,333 | 102,461,162 | 5 | 1 | 6 | 0 |
| Case 105 | 16 | 88,165      | 5,143,537   | 2 | 2 | 4 | 0 |
| Case 105 | 16 | 5,145,230   | 5,632,234   | 3 | 2 | 5 | 0 |
| Case 105 | 16 | 5,632,482   | 6,879,217   | 2 | 2 | 4 | 0 |
| Case 105 | 16 | 6,879,583   | 7,250,270   | 3 | 2 | 5 | 0 |
| Case 105 | 16 | 7,251,931   | 10,059,007  | 2 | 2 | 4 | 0 |
| Case 105 | 16 | 10,059,826  | 10,268,330  | 3 | 2 | 5 | 0 |
| Case 105 | 16 | 10,273,981  | 16,911,160  | 2 | 2 | 4 | 0 |
| Case 105 | 16 | 16,912,004  | 17,127,423  | 3 | 2 | 5 | 0 |
| Case 105 | 16 | 17,132,437  | 19,280,235  | 2 | 2 | 4 | 0 |
| Case 105 | 16 | 19,280,924  | 19,355,577  | 3 | 2 | 5 | 0 |
| Case 105 | 16 | 19,355,747  | 24,288,512  | 2 | 2 | 4 | 0 |
| Case 105 | 16 | 24,288,752  | 24,440,046  | 3 | 2 | 5 | 0 |
| Case 105 | 16 | 24,446,533  | 25,547,673  | 2 | 2 | 4 | 0 |
| Case 105 | 16 | 25,548,877  | 25,667,914  | 3 | 2 | 5 | 0 |
| Case 105 | 16 | 25,669,862  | 33,557,021  | 2 | 2 | 4 | 0 |
| Case 105 | 16 | 33,836,510  | 35,285,582  | 2 | 1 | 3 | 0 |
| Case 105 | 16 | 46,450,037  | 90,274,695  | 2 | 1 | 3 | 0 |
| Case 105 | 17 | 11,885      | 22,242,355  | 3 | 0 | 3 | 1 |
| Case 105 | 17 | 25,268,142  | 25,346,692  | 3 | 0 | 3 | 1 |
| Case 105 | 17 | 25,350,029  | 34,476,396  | 3 | 1 | 4 | 0 |
| Case 105 | 17 | 34,597,521  | 34,994,977  | 2 | 1 | 3 | 0 |
| Case 105 | 17 | 35,002,667  | 36,194,230  | 3 | 1 | 4 | 0 |
| Case 105 | 17 | 36,195,934  | 36,491,033  | 2 | 1 | 3 | 0 |
| Case 105 | 17 | 36,492,448  | 37,777,235  | 3 | 1 | 4 | 0 |
| Case 105 | 17 | 37,781,849  | 37,863,339  | 2 | 1 | 3 | 0 |
| Case 105 | 17 | 37,863,708  | 40,915,557  | 3 | 1 | 4 | 0 |
| Case 105 | 17 | 40,919,959  | 41,167,957  | 2 | 1 | 3 | 0 |
| Case 105 | 17 | 41,168,330  | 41,361,960  | 3 | 1 | 4 | 0 |
| Case 105 | 17 | 41,362,022  | 41,611,269  | 2 | 1 | 3 | 0 |
| Case 105 | 17 | 41,615,830  | 42,361,360  | 3 | 1 | 4 | 0 |
| Case 105 | 17 | 42,364,996  | 43,003,522  | 2 | 1 | 3 | 0 |
| Case 105 | 17 | 43,005,655  | 48,594,690  | 3 | 1 | 4 | 0 |
| Case 105 | 17 | 48,594,691  | 48,765,064  | 2 | 1 | 3 | 0 |
| Case 105 | 17 | 48,768,515  | 57,208,921  | 3 | 1 | 4 | 0 |
| Case 105 | 17 | 57,210,721  | 57,487,538  | 2 | 1 | 3 | 0 |
| Case 105 | 17 | 57,489,366  | 61,959,740  | 3 | 1 | 4 | 0 |
| Case 105 | 17 | 61,963,172  | 62,049,740  | 2 | 1 | 3 | 0 |
| Case 105 | 17 | 62,049,954  | 64,638,001  | 3 | 1 | 4 | 0 |
| Case 105 | 17 | 64,638,134  | 65,052,356  | 2 | 1 | 3 | 0 |



|          |    |            |            |   |   |   |   |
|----------|----|------------|------------|---|---|---|---|
| Case 105 | 17 | 65,052,396 | 71,164,376 | 3 | 1 | 4 | 0 |
| Case 105 | 17 | 71,165,470 | 71,282,050 | 2 | 1 | 3 | 0 |
| Case 105 | 17 | 71,282,243 | 72,227,040 | 3 | 1 | 4 | 0 |
| Case 105 | 17 | 72,227,077 | 72,462,881 | 2 | 1 | 3 | 0 |
| Case 105 | 17 | 72,467,868 | 72,838,813 | 3 | 1 | 4 | 0 |
| Case 105 | 17 | 72,839,647 | 73,000,053 | 2 | 1 | 3 | 0 |
| Case 105 | 17 | 73,000,061 | 73,494,963 | 3 | 1 | 4 | 0 |
| Case 105 | 17 | 73,495,025 | 73,753,305 | 2 | 1 | 3 | 0 |
| Case 105 | 17 | 73,753,310 | 73,888,407 | 3 | 1 | 4 | 0 |
| Case 105 | 17 | 73,888,437 | 74,260,758 | 2 | 1 | 3 | 0 |
| Case 105 | 17 | 74,262,426 | 74,300,497 | 3 | 1 | 4 | 0 |
| Case 105 | 17 | 74,300,534 | 74,622,774 | 2 | 1 | 3 | 0 |
| Case 105 | 17 | 74,623,273 | 76,404,655 | 3 | 1 | 4 | 0 |
| Case 105 | 17 | 76,410,977 | 76,491,127 | 2 | 1 | 3 | 0 |
| Case 105 | 17 | 76,491,194 | 76,528,660 | 3 | 1 | 4 | 0 |
| Case 105 | 17 | 76,528,754 | 76,853,714 | 3 | 0 | 3 | 1 |
| Case 105 | 17 | 76,862,105 | 77,381,431 | 3 | 1 | 4 | 0 |
| Case 105 | 17 | 77,383,561 | 78,444,750 | 2 | 1 | 3 | 0 |
| Case 105 | 17 | 78,444,948 | 79,139,164 | 3 | 1 | 4 | 0 |
| Case 105 | 17 | 79,145,891 | 80,560,494 | 3 | 0 | 3 | 1 |
| Case 105 | 17 | 80,561,324 | 81,060,040 | 3 | 1 | 4 | 0 |
| Case 105 | 18 | 87,505     | 669,087    | 4 | 0 | 4 | 1 |
| Case 105 | 18 | 669,117    | 1,487,818  | 5 | 0 | 5 | 1 |
| Case 105 | 18 | 1,487,972  | 1,815,516  | 3 | 1 | 4 | 0 |
| Case 105 | 18 | 1,817,362  | 1,826,417  | 2 | 1 | 3 | 0 |
| Case 105 | 18 | 1,829,374  | 5,391,181  | 5 | 0 | 5 | 1 |
| Case 105 | 18 | 5,395,098  | 5,398,134  | 3 | 1 | 4 | 0 |
| Case 105 | 18 | 5,405,326  | 9,026,488  | 4 | 0 | 4 | 1 |
| Case 105 | 18 | 9,029,580  | 9,047,864  | 2 | 1 | 3 | 0 |
| Case 105 | 18 | 9,047,881  | 11,687,569 | 5 | 0 | 5 | 1 |
| Case 105 | 18 | 11,688,979 | 11,746,708 | 3 | 1 | 4 | 0 |
| Case 105 | 18 | 11,748,216 | 13,643,392 | 4 | 0 | 4 | 1 |
| Case 105 | 18 | 13,645,156 | 13,649,281 | 2 | 1 | 3 | 0 |
| Case 105 | 18 | 13,655,146 | 15,102,421 | 5 | 0 | 5 | 1 |
| Case 105 | 18 | 15,249,516 | 15,375,878 | 3 | 1 | 4 | 0 |
| Case 105 | 18 | 18,520,354 | 19,578,355 | 3 | 0 | 3 | 1 |
| Case 105 | 18 | 19,585,607 | 21,776,090 | 4 | 0 | 4 | 1 |
| Case 105 | 18 | 21,782,869 | 56,133,165 | 2 | 0 | 2 | 1 |
| Case 105 | 18 | 56,138,943 | 56,204,768 | 3 | 0 | 3 | 1 |
| Case 105 | 18 | 56,204,832 | 56,486,638 | 2 | 0 | 2 | 1 |
| Case 105 | 18 | 56,495,790 | 56,685,232 | 3 | 0 | 3 | 1 |
| Case 105 | 18 | 56,688,070 | 78,015,180 | 2 | 0 | 2 | 1 |
| Case 105 | 19 | 260,912    | 16,001,215 | 2 | 0 | 2 | 1 |
| Case 105 | 19 | 16,001,389 | 16,025,439 | 3 | 0 | 3 | 1 |
| Case 105 | 19 | 16,025,633 | 24,629,285 | 2 | 0 | 2 | 1 |
| Case 105 | 19 | 27,732,159 | 27,862,694 | 2 | 0 | 2 | 1 |
| Case 105 | 19 | 27,919,724 | 28,497,681 | 2 | 1 | 3 | 0 |
| Case 105 | 19 | 28,511,434 | 29,038,401 | 2 | 2 | 4 | 0 |
| Case 105 | 19 | 29,044,209 | 29,336,664 | 2 | 1 | 3 | 0 |
| Case 105 | 19 | 29,340,372 | 31,764,851 | 2 | 2 | 4 | 0 |
| Case 105 | 19 | 31,767,465 | 32,011,548 | 2 | 1 | 3 | 0 |
| Case 105 | 19 | 32,012,510 | 33,013,506 | 2 | 2 | 4 | 0 |
| Case 105 | 19 | 33,014,643 | 33,324,223 | 2 | 1 | 3 | 0 |
| Case 105 | 19 | 33,329,144 | 35,439,590 | 2 | 2 | 4 | 0 |
| Case 105 | 19 | 35,448,803 | 35,633,635 | 2 | 1 | 3 | 0 |
| Case 105 | 19 | 35,635,897 | 36,204,690 | 2 | 2 | 4 | 0 |
| Case 105 | 19 | 36,206,050 | 38,456,823 | 2 | 1 | 3 | 0 |
| Case 105 | 19 | 38,460,797 | 38,851,455 | 2 | 2 | 4 | 0 |
| Case 105 | 19 | 38,852,346 | 39,119,494 | 2 | 1 | 3 | 0 |
| Case 105 | 19 | 39,122,923 | 39,784,072 | 2 | 2 | 4 | 0 |
| Case 105 | 19 | 39,785,877 | 39,915,884 | 2 | 1 | 3 | 0 |

|          |    |            |            |   |   |   |   |
|----------|----|------------|------------|---|---|---|---|
| Case 105 | 19 | 39,915,896 | 40,176,836 | 2 | 2 | 4 | 0 |
| Case 105 | 19 | 40,182,595 | 41,341,589 | 2 | 1 | 3 | 0 |
| Case 105 | 19 | 41,350,895 | 41,379,148 | 2 | 0 | 2 | 1 |
| Case 105 | 19 | 41,382,476 | 41,716,271 | 2 | 2 | 4 | 0 |
| Case 105 | 19 | 41,721,831 | 41,944,313 | 2 | 1 | 3 | 0 |
| Case 105 | 19 | 41,945,795 | 42,383,114 | 2 | 2 | 4 | 0 |
| Case 105 | 19 | 42,383,168 | 43,284,120 | 2 | 1 | 3 | 0 |
| Case 105 | 19 | 43,285,368 | 43,954,915 | 2 | 2 | 4 | 0 |
| Case 105 | 19 | 43,955,114 | 44,636,749 | 2 | 1 | 3 | 0 |
| Case 105 | 19 | 44,636,802 | 45,254,566 | 2 | 2 | 4 | 0 |
| Case 105 | 19 | 45,256,947 | 45,916,985 | 2 | 1 | 3 | 0 |
| Case 105 | 19 | 45,916,986 | 46,221,726 | 2 | 2 | 4 | 0 |
| Case 105 | 19 | 46,233,548 | 46,320,082 | 2 | 1 | 3 | 0 |
| Case 105 | 19 | 46,322,585 | 47,257,481 | 2 | 2 | 4 | 0 |
| Case 105 | 19 | 47,258,942 | 47,920,565 | 2 | 1 | 3 | 0 |
| Case 105 | 19 | 47,920,571 | 48,215,633 | 2 | 2 | 4 | 0 |
| Case 105 | 19 | 48,216,792 | 48,475,932 | 2 | 1 | 3 | 0 |
| Case 105 | 19 | 48,478,110 | 48,789,612 | 2 | 2 | 4 | 0 |
| Case 105 | 19 | 48,789,663 | 49,392,867 | 2 | 1 | 3 | 0 |
| Case 105 | 19 | 49,392,882 | 49,651,989 | 2 | 2 | 4 | 0 |
| Case 105 | 19 | 49,652,888 | 51,254,550 | 2 | 1 | 3 | 0 |
| Case 105 | 19 | 51,259,660 | 51,614,461 | 2 | 2 | 4 | 0 |
| Case 105 | 19 | 51,619,559 | 52,000,151 | 2 | 1 | 3 | 0 |
| Case 105 | 19 | 52,000,181 | 52,353,834 | 2 | 2 | 4 | 0 |
| Case 105 | 19 | 52,356,791 | 52,658,547 | 2 | 1 | 3 | 0 |
| Case 105 | 19 | 52,659,362 | 52,887,390 | 2 | 2 | 4 | 0 |
| Case 105 | 19 | 52,887,427 | 53,116,643 | 2 | 1 | 3 | 0 |
| Case 105 | 19 | 53,116,700 | 53,311,563 | 2 | 2 | 4 | 0 |
| Case 105 | 19 | 53,332,039 | 53,358,889 | 3 | 2 | 5 | 0 |
| Case 105 | 19 | 53,363,030 | 54,551,282 | 2 | 2 | 4 | 0 |
| Case 105 | 19 | 54,553,697 | 54,974,084 | 2 | 1 | 3 | 0 |
| Case 105 | 19 | 54,974,318 | 55,559,715 | 2 | 2 | 4 | 0 |
| Case 105 | 19 | 55,559,740 | 55,903,103 | 2 | 1 | 3 | 0 |
| Case 105 | 19 | 55,904,593 | 56,369,778 | 2 | 2 | 4 | 0 |
| Case 105 | 19 | 56,369,908 | 56,539,199 | 2 | 1 | 3 | 0 |
| Case 105 | 19 | 56,539,224 | 57,279,391 | 2 | 2 | 4 | 0 |
| Case 105 | 19 | 57,281,577 | 57,396,250 | 2 | 1 | 3 | 0 |
| Case 105 | 19 | 57,398,148 | 57,487,497 | 2 | 2 | 4 | 0 |
| Case 105 | 19 | 57,487,513 | 58,601,570 | 2 | 1 | 3 | 0 |
| Case 105 | 19 | 58,601,645 | 58,708,730 | 2 | 2 | 4 | 0 |
| Case 105 | 19 | 58,714,235 | 59,097,160 | 2 | 1 | 3 | 0 |
| Case 105 | 20 | 63,244     | 1,676,943  | 3 | 1 | 4 | 0 |
| Case 105 | 20 | 1,678,188  | 2,015,506  | 4 | 1 | 5 | 0 |
| Case 105 | 20 | 2,017,767  | 3,354,787  | 3 | 1 | 4 | 0 |
| Case 105 | 20 | 3,356,886  | 3,520,496  | 4 | 1 | 5 | 0 |
| Case 105 | 20 | 3,520,704  | 4,091,972  | 3 | 1 | 4 | 0 |
| Case 105 | 20 | 4,093,252  | 4,302,473  | 4 | 1 | 5 | 0 |
| Case 105 | 20 | 4,307,245  | 4,444,161  | 3 | 1 | 4 | 0 |
| Case 105 | 20 | 4,444,527  | 4,593,976  | 4 | 1 | 5 | 0 |
| Case 105 | 20 | 4,594,466  | 5,393,787  | 3 | 1 | 4 | 0 |
| Case 105 | 20 | 5,395,483  | 5,843,479  | 4 | 1 | 5 | 0 |
| Case 105 | 20 | 5,843,672  | 6,033,379  | 3 | 1 | 4 | 0 |
| Case 105 | 20 | 6,034,532  | 7,692,889  | 4 | 1 | 5 | 0 |
| Case 105 | 20 | 7,694,050  | 7,955,347  | 3 | 1 | 4 | 0 |
| Case 105 | 20 | 7,957,766  | 10,393,439 | 4 | 1 | 5 | 0 |
| Case 105 | 20 | 10,393,747 | 10,897,878 | 3 | 1 | 4 | 0 |
| Case 105 | 20 | 10,898,466 | 12,039,845 | 4 | 1 | 5 | 0 |
| Case 105 | 20 | 12,039,984 | 12,642,152 | 3 | 1 | 4 | 0 |
| Case 105 | 20 | 12,643,234 | 13,302,241 | 4 | 1 | 5 | 0 |
| Case 105 | 20 | 13,306,386 | 14,054,163 | 3 | 1 | 4 | 0 |
| Case 105 | 20 | 14,055,947 | 14,550,380 | 4 | 1 | 5 | 0 |

|          |    |            |            |   |   |   |   |
|----------|----|------------|------------|---|---|---|---|
| Case 105 | 20 | 14,553,745 | 15,028,034 | 3 | 1 | 4 | 0 |
| Case 105 | 20 | 15,028,962 | 15,367,873 | 4 | 1 | 5 | 0 |
| Case 105 | 20 | 15,368,919 | 15,655,604 | 3 | 1 | 4 | 0 |
| Case 105 | 20 | 15,657,202 | 15,873,776 | 4 | 1 | 5 | 0 |
| Case 105 | 20 | 15,874,325 | 15,971,797 | 3 | 1 | 4 | 0 |
| Case 105 | 20 | 15,973,949 | 16,170,867 | 4 | 1 | 5 | 0 |
| Case 105 | 20 | 16,172,267 | 16,376,473 | 3 | 1 | 4 | 0 |
| Case 105 | 20 | 16,381,626 | 16,716,075 | 4 | 1 | 5 | 0 |
| Case 105 | 20 | 16,716,344 | 17,693,261 | 3 | 1 | 4 | 0 |
| Case 105 | 20 | 17,695,725 | 17,787,845 | 4 | 1 | 5 | 0 |
| Case 105 | 20 | 17,789,528 | 18,471,623 | 3 | 1 | 4 | 0 |
| Case 105 | 20 | 18,473,796 | 18,899,166 | 4 | 1 | 5 | 0 |
| Case 105 | 20 | 18,902,228 | 19,319,384 | 3 | 1 | 4 | 0 |
| Case 105 | 20 | 19,319,846 | 19,716,093 | 4 | 1 | 5 | 0 |
| Case 105 | 20 | 19,716,602 | 21,223,410 | 3 | 1 | 4 | 0 |
| Case 105 | 20 | 21,223,663 | 21,775,783 | 4 | 1 | 5 | 0 |
| Case 105 | 20 | 21,776,735 | 22,367,048 | 3 | 1 | 4 | 0 |
| Case 105 | 20 | 22,371,671 | 22,880,315 | 4 | 1 | 5 | 0 |
| Case 105 | 20 | 22,887,257 | 23,433,602 | 3 | 1 | 4 | 0 |
| Case 105 | 20 | 23,442,042 | 23,578,674 | 4 | 1 | 5 | 0 |
| Case 105 | 20 | 23,583,023 | 24,524,692 | 3 | 1 | 4 | 0 |
| Case 105 | 20 | 24,526,724 | 24,790,404 | 4 | 1 | 5 | 0 |
| Case 105 | 20 | 24,794,975 | 26,293,985 | 3 | 1 | 4 | 0 |
| Case 105 | 20 | 29,425,357 | 36,221,744 | 3 | 1 | 4 | 0 |
| Case 105 | 20 | 36,222,184 | 36,560,076 | 4 | 1 | 5 | 0 |
| Case 105 | 20 | 36,560,124 | 37,713,976 | 3 | 1 | 4 | 0 |
| Case 105 | 20 | 37,722,023 | 39,617,398 | 4 | 1 | 5 | 0 |
| Case 105 | 20 | 39,623,283 | 40,373,810 | 3 | 1 | 4 | 0 |
| Case 105 | 20 | 40,380,068 | 40,583,920 | 4 | 1 | 5 | 0 |
| Case 105 | 20 | 40,585,492 | 41,718,596 | 3 | 1 | 4 | 0 |
| Case 105 | 20 | 41,721,166 | 41,862,171 | 4 | 1 | 5 | 0 |
| Case 105 | 20 | 41,868,791 | 45,434,399 | 3 | 1 | 4 | 0 |
| Case 105 | 20 | 45,449,779 | 45,769,206 | 4 | 1 | 5 | 0 |
| Case 105 | 20 | 45,770,401 | 46,400,713 | 3 | 1 | 4 | 0 |
| Case 105 | 20 | 46,401,555 | 48,497,473 | 3 | 2 | 5 | 0 |
| Case 105 | 20 | 48,499,609 | 50,131,999 | 3 | 1 | 4 | 0 |
| Case 105 | 20 | 50,133,423 | 51,840,634 | 3 | 2 | 5 | 0 |
| Case 105 | 20 | 51,848,072 | 51,924,075 | 2 | 2 | 4 | 0 |
| Case 105 | 20 | 51,924,497 | 54,611,746 | 3 | 2 | 5 | 0 |
| Case 105 | 20 | 54,616,061 | 54,818,630 | 2 | 2 | 4 | 0 |
| Case 105 | 20 | 54,819,006 | 58,411,580 | 3 | 1 | 4 | 0 |
| Case 105 | 20 | 58,413,101 | 58,456,076 | 4 | 1 | 5 | 0 |
| Case 105 | 20 | 58,457,153 | 58,502,648 | 5 | 1 | 6 | 0 |
| Case 105 | 20 | 58,511,286 | 58,897,358 | 3 | 1 | 4 | 0 |
| Case 105 | 20 | 58,901,694 | 59,777,873 | 3 | 2 | 5 | 0 |
| Case 105 | 20 | 59,778,412 | 59,836,962 | 2 | 2 | 4 | 0 |
| Case 105 | 20 | 59,845,250 | 62,426,393 | 3 | 1 | 4 | 0 |
| Case 105 | 20 | 62,468,726 | 62,948,788 | 2 | 2 | 4 | 0 |
| Case 105 | 21 | 10,827,533 | 10,942,992 | 2 | 1 | 3 | 0 |
| Case 105 | 21 | 10,970,025 | 10,971,337 | 1 | 1 | 2 | 0 |
| Case 105 | 21 | 14,368,320 | 17,452,276 | 1 | 0 | 1 | 0 |
| Case 105 | 21 | 17,459,301 | 24,768,759 | 1 | 1 | 2 | 0 |
| Case 105 | 21 | 24,770,907 | 28,620,731 | 2 | 1 | 3 | 0 |
| Case 105 | 21 | 28,626,945 | 34,907,024 | 1 | 1 | 2 | 0 |
| Case 105 | 21 | 34,911,575 | 34,994,303 | 2 | 1 | 3 | 0 |
| Case 105 | 21 | 34,997,018 | 35,984,463 | 1 | 1 | 2 | 0 |
| Case 105 | 21 | 35,987,882 | 38,056,590 | 1 | 0 | 1 | 0 |
| Case 105 | 21 | 38,061,129 | 39,628,198 | 2 | 0 | 2 | 1 |
| Case 105 | 21 | 39,633,192 | 48,100,155 | 3 | 0 | 3 | 1 |
| Case 105 | 22 | 16,114,244 | 17,443,678 | 4 | 0 | 4 | 1 |
| Case 105 | 22 | 17,444,619 | 17,590,582 | 3 | 0 | 3 | 1 |

|          |    |            |            |   |   |   |   |
|----------|----|------------|------------|---|---|---|---|
| Case 105 | 22 | 17,590,607 | 17,990,852 | 4 | 0 | 4 | 1 |
| Case 105 | 22 | 17,990,861 | 18,031,793 | 3 | 0 | 3 | 1 |
| Case 105 | 22 | 18,031,817 | 18,596,449 | 4 | 0 | 4 | 1 |
| Case 105 | 22 | 18,597,502 | 19,506,456 | 3 | 0 | 3 | 1 |
| Case 105 | 22 | 19,506,717 | 23,262,360 | 4 | 0 | 4 | 1 |
| Case 105 | 22 | 23,263,708 | 23,708,020 | 3 | 0 | 3 | 1 |
| Case 105 | 22 | 23,708,833 | 24,001,094 | 4 | 0 | 4 | 1 |
| Case 105 | 22 | 24,004,787 | 24,129,005 | 3 | 0 | 3 | 1 |
| Case 105 | 22 | 24,133,570 | 24,562,961 | 4 | 0 | 4 | 1 |
| Case 105 | 22 | 24,562,977 | 24,583,953 | 3 | 0 | 3 | 1 |
| Case 105 | 22 | 24,584,027 | 30,639,834 | 4 | 0 | 4 | 1 |
| Case 105 | 22 | 30,639,969 | 30,812,022 | 3 | 0 | 3 | 1 |
| Case 105 | 22 | 30,813,424 | 32,554,985 | 4 | 0 | 4 | 1 |
| Case 105 | 22 | 32,554,994 | 32,722,207 | 3 | 0 | 3 | 1 |
| Case 105 | 22 | 32,722,963 | 32,914,049 | 4 | 0 | 4 | 1 |
| Case 105 | 22 | 32,914,067 | 33,357,831 | 3 | 0 | 3 | 1 |
| Case 105 | 22 | 33,363,420 | 33,748,362 | 4 | 0 | 4 | 1 |
| Case 105 | 22 | 33,758,736 | 33,826,566 | 3 | 0 | 3 | 1 |
| Case 105 | 22 | 33,828,243 | 33,832,148 | 3 | 1 | 4 | 0 |
| Case 105 | 22 | 33,832,735 | 34,642,423 | 5 | 0 | 5 | 1 |
| Case 105 | 22 | 34,645,357 | 34,646,980 | 3 | 1 | 4 | 0 |
| Case 105 | 22 | 34,654,148 | 36,268,597 | 2 | 0 | 2 | 1 |
| Case 105 | 22 | 36,272,637 | 36,447,564 | 3 | 0 | 3 | 1 |
| Case 105 | 22 | 36,448,640 | 36,678,782 | 4 | 0 | 4 | 1 |
| Case 105 | 22 | 36,678,809 | 36,943,544 | 3 | 0 | 3 | 1 |
| Case 105 | 22 | 36,954,628 | 37,530,332 | 4 | 0 | 4 | 1 |
| Case 105 | 22 | 37,531,375 | 37,603,390 | 3 | 0 | 3 | 1 |
| Case 105 | 22 | 37,603,493 | 38,007,812 | 4 | 0 | 4 | 1 |
| Case 105 | 22 | 38,009,241 | 38,481,311 | 3 | 0 | 3 | 1 |
| Case 105 | 22 | 38,481,347 | 39,530,132 | 4 | 0 | 4 | 1 |
| Case 105 | 22 | 39,530,471 | 39,794,434 | 3 | 0 | 3 | 1 |
| Case 105 | 22 | 39,797,779 | 40,959,920 | 4 | 0 | 4 | 1 |
| Case 105 | 22 | 40,971,703 | 42,000,133 | 3 | 0 | 3 | 1 |
| Case 105 | 22 | 42,008,031 | 43,716,324 | 4 | 0 | 4 | 1 |
| Case 105 | 22 | 43,716,971 | 43,936,229 | 3 | 0 | 3 | 1 |
| Case 105 | 22 | 43,941,451 | 44,576,132 | 4 | 0 | 4 | 1 |
| Case 105 | 22 | 44,576,655 | 44,628,068 | 3 | 0 | 3 | 1 |
| Case 105 | 22 | 44,634,211 | 51,195,728 | 2 | 0 | 2 | 1 |
| Case 106 | 1  | 82,154     | 2,473,258  | 1 | 1 | 2 | 0 |
| Case 106 | 1  | 2,480,337  | 2,540,795  | 1 | 0 | 1 | 0 |
| Case 106 | 1  | 2,541,133  | 5,114,102  | 1 | 1 | 2 | 0 |
| Case 106 | 1  | 5,124,859  | 5,193,026  | 1 | 0 | 1 | 0 |
| Case 106 | 1  | 5,195,371  | 5,240,211  | 2 | 0 | 2 | 1 |
| Case 106 | 1  | 5,243,848  | 5,482,386  | 1 | 0 | 1 | 0 |
| Case 106 | 1  | 5,485,177  | 5,558,726  | 2 | 0 | 2 | 1 |
| Case 106 | 1  | 5,559,249  | 5,646,002  | 1 | 0 | 1 | 0 |
| Case 106 | 1  | 5,646,264  | 5,747,184  | 2 | 0 | 2 | 1 |
| Case 106 | 1  | 5,747,488  | 5,777,457  | 1 | 0 | 1 | 0 |
| Case 106 | 1  | 5,777,920  | 8,000,797  | 1 | 1 | 2 | 0 |
| Case 106 | 1  | 8,009,763  | 8,066,914  | 1 | 0 | 1 | 0 |
| Case 106 | 1  | 8,073,398  | 8,074,094  | 2 | 0 | 2 | 1 |
| Case 106 | 1  | 8,074,187  | 9,324,684  | 1 | 0 | 1 | 0 |
| Case 106 | 1  | 9,324,716  | 9,489,972  | 2 | 0 | 2 | 1 |
| Case 106 | 1  | 9,490,339  | 9,741,792  | 1 | 0 | 1 | 0 |
| Case 106 | 1  | 9,746,248  | 11,190,698 | 1 | 1 | 2 | 0 |
| Case 106 | 1  | 11,194,410 | 11,589,911 | 1 | 0 | 1 | 0 |
| Case 106 | 1  | 11,589,972 | 11,718,797 | 2 | 0 | 2 | 1 |
| Case 106 | 1  | 11,718,819 | 11,788,564 | 1 | 0 | 1 | 0 |
| Case 106 | 1  | 11,794,553 | 11,983,517 | 1 | 1 | 2 | 0 |
| Case 106 | 1  | 11,985,288 | 12,025,561 | 1 | 0 | 1 | 0 |
| Case 106 | 1  | 12,025,599 | 12,069,725 | 2 | 0 | 2 | 1 |

|          |   |            |            |   |   |   |   |
|----------|---|------------|------------|---|---|---|---|
| Case 106 | 1 | 12,070,292 | 12,309,363 | 1 | 0 | 1 | 0 |
| Case 106 | 1 | 12,313,827 | 12,337,888 | 2 | 0 | 2 | 1 |
| Case 106 | 1 | 12,338,083 | 12,628,188 | 1 | 0 | 1 | 0 |
| Case 106 | 1 | 12,628,440 | 12,682,855 | 2 | 0 | 2 | 1 |
| Case 106 | 1 | 12,683,190 | 12,774,999 | 1 | 0 | 1 | 0 |
| Case 106 | 1 | 12,775,851 | 12,786,363 | 2 | 0 | 2 | 1 |
| Case 106 | 1 | 12,786,417 | 12,833,428 | 1 | 0 | 1 | 0 |
| Case 106 | 1 | 12,835,144 | 12,921,278 | 2 | 0 | 2 | 1 |
| Case 106 | 1 | 12,961,019 | 14,106,705 | 1 | 0 | 1 | 0 |
| Case 106 | 1 | 14,107,112 | 14,162,023 | 2 | 0 | 2 | 1 |
| Case 106 | 1 | 14,163,485 | 14,425,555 | 1 | 0 | 1 | 0 |
| Case 106 | 1 | 14,426,751 | 14,447,657 | 2 | 0 | 2 | 1 |
| Case 106 | 1 | 14,448,184 | 14,629,281 | 1 | 0 | 1 | 0 |
| Case 106 | 1 | 14,629,413 | 14,677,729 | 2 | 0 | 2 | 1 |
| Case 106 | 1 | 14,678,726 | 14,789,535 | 1 | 0 | 1 | 0 |
| Case 106 | 1 | 14,790,075 | 15,208,212 | 2 | 0 | 2 | 1 |
| Case 106 | 1 | 15,211,824 | 15,281,095 | 1 | 0 | 1 | 0 |
| Case 106 | 1 | 15,283,217 | 15,330,300 | 2 | 0 | 2 | 1 |
| Case 106 | 1 | 15,331,802 | 15,671,649 | 1 | 0 | 1 | 0 |
| Case 106 | 1 | 15,674,269 | 15,752,716 | 2 | 0 | 2 | 1 |
| Case 106 | 1 | 15,753,398 | 16,253,999 | 1 | 0 | 1 | 0 |
| Case 106 | 1 | 16,254,702 | 16,260,692 | 2 | 0 | 2 | 1 |
| Case 106 | 1 | 16,260,803 | 16,342,220 | 1 | 0 | 1 | 0 |
| Case 106 | 1 | 16,343,694 | 16,442,908 | 2 | 0 | 2 | 1 |
| Case 106 | 1 | 16,446,349 | 16,797,756 | 1 | 0 | 1 | 0 |
| Case 106 | 1 | 16,814,994 | 17,249,173 | 2 | 0 | 2 | 1 |
| Case 106 | 1 | 17,249,200 | 17,297,583 | 1 | 0 | 1 | 0 |
| Case 106 | 1 | 17,299,727 | 17,303,652 | 2 | 0 | 2 | 1 |
| Case 106 | 1 | 17,305,903 | 17,394,623 | 1 | 0 | 1 | 0 |
| Case 106 | 1 | 17,394,775 | 17,550,121 | 2 | 0 | 2 | 1 |
| Case 106 | 1 | 17,550,167 | 17,586,179 | 1 | 0 | 1 | 0 |
| Case 106 | 1 | 17,588,162 | 17,601,266 | 2 | 0 | 2 | 1 |
| Case 106 | 1 | 17,601,269 | 18,031,533 | 1 | 0 | 1 | 0 |
| Case 106 | 1 | 18,033,499 | 18,438,930 | 2 | 0 | 2 | 1 |
| Case 106 | 1 | 18,447,551 | 18,461,490 | 1 | 0 | 1 | 0 |
| Case 106 | 1 | 18,467,153 | 18,566,065 | 2 | 0 | 2 | 1 |
| Case 106 | 1 | 18,566,851 | 18,643,577 | 1 | 0 | 1 | 0 |
| Case 106 | 1 | 18,643,632 | 18,807,117 | 2 | 0 | 2 | 1 |
| Case 106 | 1 | 18,807,521 | 18,807,851 | 1 | 0 | 1 | 0 |
| Case 106 | 1 | 18,807,938 | 18,808,292 | 2 | 0 | 2 | 1 |
| Case 106 | 1 | 18,808,526 | 18,836,431 | 1 | 0 | 1 | 0 |
| Case 106 | 1 | 18,839,126 | 19,062,163 | 2 | 0 | 2 | 1 |
| Case 106 | 1 | 19,062,204 | 19,100,436 | 1 | 0 | 1 | 0 |
| Case 106 | 1 | 19,102,509 | 19,175,593 | 2 | 0 | 2 | 1 |
| Case 106 | 1 | 19,175,846 | 19,183,875 | 1 | 0 | 1 | 0 |
| Case 106 | 1 | 19,184,075 | 19,201,071 | 2 | 0 | 2 | 1 |
| Case 106 | 1 | 19,201,919 | 19,211,987 | 1 | 0 | 1 | 0 |
| Case 106 | 1 | 19,212,051 | 19,344,501 | 2 | 0 | 2 | 1 |
| Case 106 | 1 | 19,344,586 | 19,393,033 | 1 | 0 | 1 | 0 |
| Case 106 | 1 | 19,400,626 | 19,415,254 | 2 | 0 | 2 | 1 |
| Case 106 | 1 | 19,415,304 | 19,525,154 | 1 | 0 | 1 | 0 |
| Case 106 | 1 | 19,525,294 | 25,889,633 | 1 | 1 | 2 | 0 |
| Case 106 | 1 | 25,889,672 | 25,977,004 | 1 | 0 | 1 | 0 |
| Case 106 | 1 | 25,981,789 | 26,106,769 | 2 | 0 | 2 | 1 |
| Case 106 | 1 | 26,107,481 | 26,570,657 | 1 | 0 | 1 | 0 |
| Case 106 | 1 | 26,570,744 | 26,582,075 | 2 | 0 | 2 | 1 |
| Case 106 | 1 | 26,582,091 | 28,220,484 | 1 | 0 | 1 | 0 |
| Case 106 | 1 | 28,223,519 | 28,882,973 | 1 | 1 | 2 | 0 |
| Case 106 | 1 | 28,888,101 | 29,616,224 | 1 | 0 | 1 | 0 |
| Case 106 | 1 | 29,616,318 | 41,702,942 | 1 | 1 | 2 | 0 |
| Case 106 | 1 | 41,744,807 | 41,822,753 | 1 | 0 | 1 | 0 |

|          |   |             |             |   |   |   |   |
|----------|---|-------------|-------------|---|---|---|---|
| Case 106 | 1 | 41,830,257  | 41,878,988  | 2 | 0 | 2 | 1 |
| Case 106 | 1 | 41,879,081  | 41,978,849  | 1 | 0 | 1 | 0 |
| Case 106 | 1 | 41,978,890  | 42,408,070  | 2 | 0 | 2 | 1 |
| Case 106 | 1 | 42,417,182  | 43,699,813  | 1 | 1 | 2 | 0 |
| Case 106 | 1 | 43,704,023  | 43,773,117  | 1 | 0 | 1 | 0 |
| Case 106 | 1 | 43,773,143  | 43,803,120  | 2 | 0 | 2 | 1 |
| Case 106 | 1 | 43,803,600  | 43,805,698  | 1 | 0 | 1 | 0 |
| Case 106 | 1 | 43,806,060  | 44,134,887  | 2 | 0 | 2 | 1 |
| Case 106 | 1 | 44,137,257  | 44,319,373  | 1 | 0 | 1 | 0 |
| Case 106 | 1 | 44,345,292  | 49,937,160  | 1 | 1 | 2 | 0 |
| Case 106 | 1 | 49,949,006  | 53,153,432  | 2 | 1 | 3 | 0 |
| Case 106 | 1 | 53,153,451  | 53,996,718  | 1 | 1 | 2 | 0 |
| Case 106 | 1 | 53,999,509  | 54,121,818  | 2 | 1 | 3 | 0 |
| Case 106 | 1 | 54,129,106  | 91,786,579  | 1 | 1 | 2 | 0 |
| Case 106 | 1 | 91,788,735  | 91,850,744  | 2 | 0 | 2 | 1 |
| Case 106 | 1 | 91,851,269  | 121,346,616 | 1 | 1 | 2 | 0 |
| Case 106 | 1 | 142,649,718 | 158,123,284 | 1 | 1 | 2 | 0 |
| Case 106 | 1 | 158,123,721 | 159,696,858 | 2 | 0 | 2 | 1 |
| Case 106 | 1 | 159,696,910 | 166,362,651 | 1 | 1 | 2 | 0 |
| Case 106 | 1 | 166,364,063 | 166,860,471 | 2 | 1 | 3 | 0 |
| Case 106 | 1 | 166,882,737 | 174,552,811 | 1 | 1 | 2 | 0 |
| Case 106 | 1 | 174,592,050 | 175,029,932 | 1 | 0 | 1 | 0 |
| Case 106 | 1 | 175,033,141 | 175,852,209 | 1 | 1 | 2 | 0 |
| Case 106 | 1 | 175,859,765 | 176,261,782 | 1 | 0 | 1 | 0 |
| Case 106 | 1 | 176,271,944 | 177,237,533 | 1 | 1 | 2 | 0 |
| Case 106 | 1 | 177,242,718 | 177,249,738 | 1 | 0 | 1 | 0 |
| Case 106 | 1 | 177,250,197 | 177,745,454 | 2 | 0 | 2 | 1 |
| Case 106 | 1 | 177,748,866 | 177,899,699 | 1 | 1 | 2 | 0 |
| Case 106 | 1 | 177,900,098 | 177,906,507 | 1 | 0 | 1 | 0 |
| Case 106 | 1 | 177,906,621 | 178,491,966 | 2 | 0 | 2 | 1 |
| Case 106 | 1 | 178,492,635 | 178,976,731 | 1 | 0 | 1 | 0 |
| Case 106 | 1 | 178,984,086 | 179,042,227 | 2 | 0 | 2 | 1 |
| Case 106 | 1 | 179,042,270 | 179,317,069 | 1 | 0 | 1 | 0 |
| Case 106 | 1 | 179,319,580 | 179,339,113 | 1 | 1 | 2 | 0 |
| Case 106 | 1 | 179,339,334 | 179,831,248 | 1 | 0 | 1 | 0 |
| Case 106 | 1 | 179,832,643 | 179,989,584 | 1 | 1 | 2 | 0 |
| Case 106 | 1 | 179,990,027 | 180,062,586 | 1 | 0 | 1 | 0 |
| Case 106 | 1 | 180,062,624 | 180,124,872 | 1 | 1 | 2 | 0 |
| Case 106 | 1 | 180,126,141 | 180,138,318 | 1 | 0 | 1 | 0 |
| Case 106 | 1 | 180,138,800 | 180,236,235 | 1 | 1 | 2 | 0 |
| Case 106 | 1 | 180,238,442 | 180,904,714 | 1 | 0 | 1 | 0 |
| Case 106 | 1 | 180,904,951 | 181,299,951 | 2 | 0 | 2 | 1 |
| Case 106 | 1 | 181,300,447 | 181,358,407 | 1 | 0 | 1 | 0 |
| Case 106 | 1 | 181,359,880 | 187,183,135 | 1 | 1 | 2 | 0 |
| Case 106 | 1 | 187,196,272 | 236,189,209 | 2 | 1 | 3 | 0 |
| Case 106 | 1 | 236,189,278 | 236,265,665 | 1 | 1 | 2 | 0 |
| Case 106 | 1 | 236,269,814 | 239,570,932 | 2 | 1 | 3 | 0 |
| Case 106 | 1 | 239,574,661 | 239,962,686 | 1 | 1 | 2 | 0 |
| Case 106 | 1 | 239,970,097 | 247,404,911 | 2 | 1 | 3 | 0 |
| Case 106 | 1 | 247,412,899 | 247,503,507 | 1 | 1 | 2 | 0 |
| Case 106 | 1 | 247,507,887 | 249,218,992 | 2 | 1 | 3 | 0 |
| Case 106 | 2 | 18,674      | 252,197     | 1 | 0 | 1 | 0 |
| Case 106 | 2 | 263,270     | 309,480     | 2 | 0 | 2 | 1 |
| Case 106 | 2 | 312,992     | 371,148     | 1 | 0 | 1 | 0 |
| Case 106 | 2 | 374,086     | 504,767     | 2 | 0 | 2 | 1 |
| Case 106 | 2 | 505,759     | 943,250     | 1 | 0 | 1 | 0 |
| Case 106 | 2 | 949,196     | 973,232     | 2 | 0 | 2 | 1 |
| Case 106 | 2 | 974,720     | 1,244,060   | 1 | 0 | 1 | 0 |
| Case 106 | 2 | 1,251,198   | 45,180,150  | 2 | 0 | 2 | 1 |
| Case 106 | 2 | 45,185,224  | 45,300,029  | 3 | 0 | 3 | 1 |
| Case 106 | 2 | 45,311,319  | 92,081,640  | 2 | 0 | 2 | 1 |

|          |   |             |             |   |   |   |   |
|----------|---|-------------|-------------|---|---|---|---|
| Case 106 | 2 | 95,429,424  | 236,715,883 | 2 | 0 | 2 | 1 |
| Case 106 | 2 | 236,715,907 | 237,100,952 | 1 | 0 | 1 | 0 |
| Case 106 | 2 | 237,102,477 | 237,151,098 | 2 | 0 | 2 | 1 |
| Case 106 | 2 | 237,156,549 | 237,229,834 | 1 | 0 | 1 | 0 |
| Case 106 | 2 | 237,233,178 | 237,314,747 | 2 | 0 | 2 | 1 |
| Case 106 | 2 | 237,327,841 | 237,403,115 | 1 | 0 | 1 | 0 |
| Case 106 | 2 | 237,405,689 | 237,683,005 | 2 | 0 | 2 | 1 |
| Case 106 | 2 | 237,690,418 | 237,720,634 | 1 | 0 | 1 | 0 |
| Case 106 | 2 | 237,723,694 | 237,851,380 | 2 | 0 | 2 | 1 |
| Case 106 | 2 | 237,857,351 | 237,933,966 | 1 | 0 | 1 | 0 |
| Case 106 | 2 | 237,943,585 | 238,296,513 | 2 | 0 | 2 | 1 |
| Case 106 | 2 | 238,296,531 | 238,419,398 | 1 | 0 | 1 | 0 |
| Case 106 | 2 | 238,419,645 | 238,427,266 | 2 | 0 | 2 | 1 |
| Case 106 | 2 | 238,430,224 | 238,664,765 | 1 | 0 | 1 | 0 |
| Case 106 | 2 | 238,668,716 | 238,694,777 | 2 | 0 | 2 | 1 |
| Case 106 | 2 | 238,697,636 | 239,211,380 | 1 | 0 | 1 | 0 |
| Case 106 | 2 | 239,215,687 | 239,237,879 | 2 | 0 | 2 | 1 |
| Case 106 | 2 | 239,237,953 | 239,328,519 | 1 | 0 | 1 | 0 |
| Case 106 | 2 | 239,336,492 | 240,025,761 | 2 | 0 | 2 | 1 |
| Case 106 | 2 | 240,030,484 | 240,260,505 | 1 | 0 | 1 | 0 |
| Case 106 | 2 | 240,262,287 | 240,333,979 | 2 | 0 | 2 | 1 |
| Case 106 | 2 | 240,336,735 | 240,397,644 | 1 | 0 | 1 | 0 |
| Case 106 | 2 | 240,399,614 | 240,443,992 | 2 | 0 | 2 | 1 |
| Case 106 | 2 | 240,445,491 | 240,482,934 | 1 | 0 | 1 | 0 |
| Case 106 | 2 | 240,484,543 | 240,520,878 | 2 | 0 | 2 | 1 |
| Case 106 | 2 | 240,524,052 | 240,632,788 | 1 | 0 | 1 | 0 |
| Case 106 | 2 | 240,634,587 | 240,886,298 | 2 | 0 | 2 | 1 |
| Case 106 | 2 | 240,888,514 | 241,083,287 | 3 | 0 | 3 | 1 |
| Case 106 | 2 | 241,085,044 | 242,322,667 | 2 | 0 | 2 | 1 |
| Case 106 | 2 | 242,344,333 | 243,048,760 | 1 | 0 | 1 | 0 |
| Case 106 | 3 | 61,495      | 30,129,784  | 2 | 0 | 2 | 1 |
| Case 106 | 3 | 30,134,493  | 30,361,276  | 3 | 0 | 3 | 1 |
| Case 106 | 3 | 30,362,472  | 60,310,790  | 2 | 0 | 2 | 1 |
| Case 106 | 3 | 60,315,708  | 60,594,367  | 0 | 0 | 0 | 0 |
| Case 106 | 3 | 60,595,403  | 75,012,674  | 2 | 0 | 2 | 1 |
| Case 106 | 3 | 75,051,562  | 75,785,358  | 0 | 0 | 0 | 0 |
| Case 106 | 3 | 75,786,288  | 75,790,472  | 2 | 0 | 2 | 1 |
| Case 106 | 3 | 75,790,880  | 77,650,799  | 0 | 0 | 0 | 0 |
| Case 106 | 3 | 77,651,417  | 77,651,417  | 2 | 0 | 2 | 1 |
| Case 106 | 3 | 77,651,445  | 77,666,778  | 1 | 0 | 1 | 0 |
| Case 106 | 3 | 77,668,346  | 90,442,925  | 0 | 0 | 0 | 0 |
| Case 106 | 3 | 93,537,290  | 94,766,856  | 2 | 0 | 2 | 1 |
| Case 106 | 3 | 94,772,205  | 95,851,156  | 0 | 0 | 0 | 0 |
| Case 106 | 3 | 95,861,229  | 108,549,720 | 2 | 0 | 2 | 1 |
| Case 106 | 3 | 108,552,960 | 108,570,300 | 1 | 0 | 1 | 0 |
| Case 106 | 3 | 108,570,396 | 110,794,064 | 2 | 0 | 2 | 1 |
| Case 106 | 3 | 110,794,998 | 112,269,287 | 1 | 0 | 1 | 0 |
| Case 106 | 3 | 112,282,323 | 197,838,262 | 2 | 0 | 2 | 1 |
| Case 106 | 4 | 71,566      | 628,493     | 1 | 0 | 1 | 0 |
| Case 106 | 4 | 628,589     | 673,778     | 2 | 0 | 2 | 1 |
| Case 106 | 4 | 673,807     | 1,024,287   | 1 | 0 | 1 | 0 |
| Case 106 | 4 | 1,024,752   | 1,164,318   | 2 | 0 | 2 | 1 |
| Case 106 | 4 | 1,164,864   | 1,210,654   | 1 | 0 | 1 | 0 |
| Case 106 | 4 | 1,224,648   | 1,338,618   | 2 | 0 | 2 | 1 |
| Case 106 | 4 | 1,339,875   | 1,343,556   | 1 | 0 | 1 | 0 |
| Case 106 | 4 | 1,345,557   | 1,379,691   | 2 | 0 | 2 | 1 |
| Case 106 | 4 | 1,380,848   | 3,318,100   | 1 | 0 | 1 | 0 |
| Case 106 | 4 | 3,318,199   | 3,430,406   | 2 | 0 | 2 | 1 |
| Case 106 | 4 | 3,430,862   | 3,491,419   | 1 | 0 | 1 | 0 |
| Case 106 | 4 | 3,491,504   | 3,923,728   | 2 | 0 | 2 | 1 |
| Case 106 | 4 | 3,935,145   | 4,645,158   | 1 | 0 | 1 | 0 |

|          |   |            |            |   |   |   |   |
|----------|---|------------|------------|---|---|---|---|
| Case 106 | 4 | 4,651,063  | 4,852,354  | 2 | 0 | 2 | 1 |
| Case 106 | 4 | 4,852,867  | 4,908,281  | 1 | 0 | 1 | 0 |
| Case 106 | 4 | 4,911,642  | 5,014,223  | 2 | 0 | 2 | 1 |
| Case 106 | 4 | 5,015,167  | 5,426,224  | 1 | 0 | 1 | 0 |
| Case 106 | 4 | 5,427,691  | 5,480,337  | 2 | 0 | 2 | 1 |
| Case 106 | 4 | 5,499,335  | 5,747,072  | 1 | 0 | 1 | 0 |
| Case 106 | 4 | 5,749,784  | 5,785,351  | 2 | 0 | 2 | 1 |
| Case 106 | 4 | 5,785,442  | 5,803,735  | 1 | 0 | 1 | 0 |
| Case 106 | 4 | 5,803,903  | 5,975,174  | 2 | 0 | 2 | 1 |
| Case 106 | 4 | 5,975,538  | 6,000,691  | 1 | 0 | 1 | 0 |
| Case 106 | 4 | 6,002,830  | 6,303,878  | 2 | 0 | 2 | 1 |
| Case 106 | 4 | 6,303,955  | 6,324,246  | 1 | 0 | 1 | 0 |
| Case 106 | 4 | 6,324,647  | 6,575,960  | 2 | 0 | 2 | 1 |
| Case 106 | 4 | 6,577,023  | 6,610,668  | 1 | 0 | 1 | 0 |
| Case 106 | 4 | 6,610,905  | 6,628,640  | 2 | 0 | 2 | 1 |
| Case 106 | 4 | 6,630,195  | 6,663,319  | 1 | 0 | 1 | 0 |
| Case 106 | 4 | 6,670,315  | 6,771,474  | 2 | 0 | 2 | 1 |
| Case 106 | 4 | 6,776,212  | 6,937,984  | 1 | 0 | 1 | 0 |
| Case 106 | 4 | 6,941,375  | 7,084,858  | 2 | 0 | 2 | 1 |
| Case 106 | 4 | 7,084,985  | 7,142,427  | 1 | 0 | 1 | 0 |
| Case 106 | 4 | 7,142,868  | 7,432,402  | 2 | 0 | 2 | 1 |
| Case 106 | 4 | 7,432,577  | 7,441,323  | 1 | 0 | 1 | 0 |
| Case 106 | 4 | 7,442,126  | 8,220,029  | 2 | 0 | 2 | 1 |
| Case 106 | 4 | 8,220,400  | 8,239,242  | 1 | 0 | 1 | 0 |
| Case 106 | 4 | 8,239,318  | 8,292,827  | 2 | 0 | 2 | 1 |
| Case 106 | 4 | 8,293,163  | 8,401,372  | 1 | 0 | 1 | 0 |
| Case 106 | 4 | 8,401,375  | 8,451,460  | 2 | 0 | 2 | 1 |
| Case 106 | 4 | 8,451,559  | 8,498,456  | 1 | 0 | 1 | 0 |
| Case 106 | 4 | 8,503,281  | 8,562,668  | 2 | 0 | 2 | 1 |
| Case 106 | 4 | 8,566,213  | 8,607,587  | 1 | 0 | 1 | 0 |
| Case 106 | 4 | 8,607,757  | 8,621,123  | 2 | 0 | 2 | 1 |
| Case 106 | 4 | 8,621,172  | 8,687,075  | 1 | 0 | 1 | 0 |
| Case 106 | 4 | 8,694,389  | 9,394,090  | 2 | 0 | 2 | 1 |
| Case 106 | 4 | 9,404,812  | 9,765,875  | 1 | 0 | 1 | 0 |
| Case 106 | 4 | 9,766,749  | 9,829,086  | 2 | 0 | 2 | 1 |
| Case 106 | 4 | 9,832,512  | 9,996,661  | 1 | 0 | 1 | 0 |
| Case 106 | 4 | 9,996,890  | 10,344,431 | 2 | 0 | 2 | 1 |
| Case 106 | 4 | 10,350,765 | 10,446,707 | 1 | 0 | 1 | 0 |
| Case 106 | 4 | 10,446,725 | 10,465,712 | 2 | 0 | 2 | 1 |
| Case 106 | 4 | 10,475,280 | 10,551,560 | 1 | 0 | 1 | 0 |
| Case 106 | 4 | 10,554,478 | 10,621,516 | 2 | 0 | 2 | 1 |
| Case 106 | 4 | 10,626,314 | 10,689,292 | 1 | 0 | 1 | 0 |
| Case 106 | 4 | 10,690,043 | 10,740,267 | 2 | 0 | 2 | 1 |
| Case 106 | 4 | 10,744,548 | 11,267,586 | 1 | 0 | 1 | 0 |
| Case 106 | 4 | 11,273,101 | 11,373,795 | 2 | 0 | 2 | 1 |
| Case 106 | 4 | 11,380,054 | 11,625,588 | 1 | 0 | 1 | 0 |
| Case 106 | 4 | 11,628,238 | 11,755,497 | 2 | 0 | 2 | 1 |
| Case 106 | 4 | 11,759,562 | 13,600,910 | 1 | 0 | 1 | 0 |
| Case 106 | 4 | 13,600,953 | 13,605,618 | 2 | 0 | 2 | 1 |
| Case 106 | 4 | 13,605,733 | 15,738,370 | 1 | 0 | 1 | 0 |
| Case 106 | 4 | 15,738,795 | 15,780,233 | 2 | 0 | 2 | 1 |
| Case 106 | 4 | 15,791,464 | 15,895,791 | 1 | 0 | 1 | 0 |
| Case 106 | 4 | 15,896,088 | 15,964,090 | 2 | 0 | 2 | 1 |
| Case 106 | 4 | 15,964,134 | 15,972,905 | 1 | 0 | 1 | 0 |
| Case 106 | 4 | 15,975,839 | 15,992,916 | 2 | 0 | 2 | 1 |
| Case 106 | 4 | 15,994,002 | 16,019,985 | 1 | 0 | 1 | 0 |
| Case 106 | 4 | 16,020,034 | 16,163,486 | 2 | 0 | 2 | 1 |
| Case 106 | 4 | 16,164,230 | 16,677,557 | 1 | 0 | 1 | 0 |
| Case 106 | 4 | 16,680,651 | 16,822,918 | 2 | 0 | 2 | 1 |
| Case 106 | 4 | 16,823,900 | 23,797,000 | 1 | 0 | 1 | 0 |
| Case 106 | 4 | 23,797,521 | 23,815,924 | 2 | 0 | 2 | 1 |



|          |   |             |             |   |   |   |   |
|----------|---|-------------|-------------|---|---|---|---|
| Case 106 | 4 | 23,816,001  | 24,229,043  | 1 | 0 | 1 | 0 |
| Case 106 | 4 | 24,230,323  | 24,255,842  | 2 | 0 | 2 | 1 |
| Case 106 | 4 | 24,256,292  | 24,315,694  | 1 | 0 | 1 | 0 |
| Case 106 | 4 | 24,316,984  | 24,455,932  | 2 | 0 | 2 | 1 |
| Case 106 | 4 | 24,456,779  | 24,991,618  | 1 | 0 | 1 | 0 |
| Case 106 | 4 | 24,992,827  | 25,062,976  | 2 | 0 | 2 | 1 |
| Case 106 | 4 | 25,065,147  | 25,707,422  | 1 | 0 | 1 | 0 |
| Case 106 | 4 | 25,717,754  | 25,734,246  | 0 | 0 | 0 | 0 |
| Case 106 | 4 | 25,740,206  | 25,744,431  | 2 | 0 | 2 | 1 |
| Case 106 | 4 | 25,745,088  | 25,942,460  | 1 | 0 | 1 | 0 |
| Case 106 | 4 | 25,942,592  | 26,028,187  | 2 | 0 | 2 | 1 |
| Case 106 | 4 | 26,028,805  | 38,204,133  | 1 | 0 | 1 | 0 |
| Case 106 | 4 | 38,205,831  | 38,238,718  | 2 | 0 | 2 | 1 |
| Case 106 | 4 | 38,241,220  | 38,513,691  | 1 | 0 | 1 | 0 |
| Case 106 | 4 | 38,514,293  | 38,627,337  | 2 | 0 | 2 | 1 |
| Case 106 | 4 | 38,644,050  | 49,109,992  | 1 | 0 | 1 | 0 |
| Case 106 | 4 | 49,513,783  | 49,620,898  | 2 | 0 | 2 | 1 |
| Case 106 | 4 | 52,697,856  | 141,219,784 | 2 | 0 | 2 | 1 |
| Case 106 | 4 | 141,227,577 | 141,484,281 | 1 | 0 | 1 | 0 |
| Case 106 | 4 | 141,484,496 | 141,499,558 | 2 | 0 | 2 | 1 |
| Case 106 | 4 | 141,500,395 | 142,009,392 | 1 | 0 | 1 | 0 |
| Case 106 | 4 | 142,011,361 | 142,142,729 | 2 | 0 | 2 | 1 |
| Case 106 | 4 | 142,143,607 | 148,277,011 | 1 | 0 | 1 | 0 |
| Case 106 | 4 | 148,280,874 | 151,349,664 | 2 | 0 | 2 | 1 |
| Case 106 | 4 | 151,356,081 | 152,379,820 | 1 | 0 | 1 | 0 |
| Case 106 | 4 | 152,401,909 | 152,682,110 | 2 | 0 | 2 | 1 |
| Case 106 | 4 | 152,682,805 | 153,896,691 | 1 | 0 | 1 | 0 |
| Case 106 | 4 | 153,896,780 | 153,899,573 | 2 | 0 | 2 | 1 |
| Case 106 | 4 | 153,899,658 | 153,936,488 | 1 | 0 | 1 | 0 |
| Case 106 | 4 | 153,938,095 | 153,969,414 | 2 | 0 | 2 | 1 |
| Case 106 | 4 | 153,970,416 | 155,129,517 | 1 | 0 | 1 | 0 |
| Case 106 | 4 | 155,132,707 | 164,230,540 | 2 | 0 | 2 | 1 |
| Case 106 | 4 | 164,242,092 | 164,357,974 | 3 | 0 | 3 | 1 |
| Case 106 | 4 | 164,362,850 | 185,346,090 | 2 | 0 | 2 | 1 |
| Case 106 | 4 | 185,348,916 | 185,363,829 | 1 | 0 | 1 | 0 |
| Case 106 | 4 | 185,369,452 | 185,481,019 | 0 | 0 | 0 | 0 |
| Case 106 | 4 | 185,482,878 | 190,963,766 | 2 | 0 | 2 | 1 |
| Case 106 | 5 | 38,139      | 45,983,680  | 3 | 0 | 3 | 1 |
| Case 106 | 5 | 45,988,948  | 46,399,093  | 2 | 0 | 2 | 1 |
| Case 106 | 5 | 49,457,282  | 54,880,701  | 2 | 0 | 2 | 1 |
| Case 106 | 5 | 54,904,720  | 55,005,408  | 3 | 0 | 3 | 1 |
| Case 106 | 5 | 55,010,963  | 55,593,724  | 2 | 0 | 2 | 1 |
| Case 106 | 5 | 55,593,735  | 55,841,462  | 3 | 0 | 3 | 1 |
| Case 106 | 5 | 55,847,019  | 65,016,573  | 2 | 0 | 2 | 1 |
| Case 106 | 5 | 65,037,451  | 66,492,412  | 1 | 0 | 1 | 0 |
| Case 106 | 5 | 66,492,707  | 66,532,920  | 2 | 0 | 2 | 1 |
| Case 106 | 5 | 66,534,837  | 67,562,930  | 1 | 0 | 1 | 0 |
| Case 106 | 5 | 67,563,348  | 67,586,574  | 2 | 0 | 2 | 1 |
| Case 106 | 5 | 67,587,434  | 67,729,637  | 1 | 0 | 1 | 0 |
| Case 106 | 5 | 67,732,517  | 67,768,380  | 2 | 0 | 2 | 1 |
| Case 106 | 5 | 67,770,083  | 71,230,022  | 1 | 0 | 1 | 0 |
| Case 106 | 5 | 71,230,743  | 71,338,668  | 2 | 0 | 2 | 1 |
| Case 106 | 5 | 71,345,282  | 71,457,028  | 1 | 0 | 1 | 0 |
| Case 106 | 5 | 71,462,632  | 71,496,159  | 2 | 0 | 2 | 1 |
| Case 106 | 5 | 71,496,419  | 71,716,928  | 1 | 0 | 1 | 0 |
| Case 106 | 5 | 71,717,605  | 71,757,248  | 2 | 0 | 2 | 1 |
| Case 106 | 5 | 71,757,266  | 72,419,041  | 1 | 0 | 1 | 0 |
| Case 106 | 5 | 72,419,251  | 72,698,328  | 2 | 0 | 2 | 1 |
| Case 106 | 5 | 72,709,904  | 73,218,861  | 1 | 0 | 1 | 0 |
| Case 106 | 5 | 73,218,954  | 73,802,976  | 2 | 0 | 2 | 1 |
| Case 106 | 5 | 73,805,765  | 75,164,644  | 1 | 0 | 1 | 0 |

|          |   |             |             |   |   |   |   |
|----------|---|-------------|-------------|---|---|---|---|
| Case 106 | 5 | 75,174,598  | 75,304,492  | 2 | 0 | 2 | 1 |
| Case 106 | 5 | 75,305,574  | 76,359,024  | 1 | 0 | 1 | 0 |
| Case 106 | 5 | 76,359,042  | 76,423,967  | 2 | 0 | 2 | 1 |
| Case 106 | 5 | 76,425,867  | 79,024,734  | 1 | 0 | 1 | 0 |
| Case 106 | 5 | 79,024,747  | 79,027,379  | 2 | 0 | 2 | 1 |
| Case 106 | 5 | 79,027,405  | 87,495,504  | 1 | 0 | 1 | 0 |
| Case 106 | 5 | 87,498,849  | 87,516,519  | 2 | 0 | 2 | 1 |
| Case 106 | 5 | 87,530,253  | 89,949,229  | 1 | 0 | 1 | 0 |
| Case 106 | 5 | 89,949,325  | 89,979,750  | 2 | 0 | 2 | 1 |
| Case 106 | 5 | 89,979,824  | 89,988,504  | 1 | 0 | 1 | 0 |
| Case 106 | 5 | 89,988,549  | 89,990,440  | 2 | 0 | 2 | 1 |
| Case 106 | 5 | 89,990,447  | 91,322,648  | 1 | 0 | 1 | 0 |
| Case 106 | 5 | 91,334,299  | 180,693,127 | 2 | 0 | 2 | 1 |
| Case 106 | 6 | 108,666     | 34,613,630  | 2 | 0 | 2 | 1 |
| Case 106 | 6 | 34,617,144  | 35,096,933  | 1 | 0 | 1 | 0 |
| Case 106 | 6 | 35,100,416  | 35,118,236  | 2 | 0 | 2 | 1 |
| Case 106 | 6 | 35,124,480  | 35,289,153  | 3 | 0 | 3 | 1 |
| Case 106 | 6 | 35,289,446  | 43,473,406  | 2 | 0 | 2 | 1 |
| Case 106 | 6 | 43,475,195  | 57,512,510  | 1 | 1 | 2 | 0 |
| Case 106 | 6 | 57,535,593  | 58,055,927  | 2 | 1 | 3 | 0 |
| Case 106 | 6 | 58,150,777  | 58,752,089  | 2 | 0 | 2 | 1 |
| Case 106 | 6 | 61,891,118  | 61,891,118  | 2 | 0 | 2 | 1 |
| Case 106 | 6 | 61,891,638  | 75,238,840  | 2 | 1 | 3 | 0 |
| Case 106 | 6 | 75,264,996  | 83,967,454  | 1 | 1 | 2 | 0 |
| Case 106 | 6 | 83,968,946  | 136,578,286 | 2 | 1 | 3 | 0 |
| Case 106 | 6 | 136,579,839 | 136,599,912 | 1 | 1 | 2 | 0 |
| Case 106 | 6 | 136,612,111 | 148,734,174 | 2 | 1 | 3 | 0 |
| Case 106 | 6 | 148,736,448 | 148,782,865 | 1 | 0 | 1 | 0 |
| Case 106 | 6 | 148,785,054 | 149,919,143 | 2 | 1 | 3 | 0 |
| Case 106 | 6 | 149,919,476 | 150,141,821 | 1 | 1 | 2 | 0 |
| Case 106 | 6 | 150,145,001 | 162,619,277 | 2 | 1 | 3 | 0 |
| Case 106 | 6 | 162,621,262 | 162,828,829 | 2 | 0 | 2 | 1 |
| Case 106 | 6 | 162,831,336 | 162,993,672 | 1 | 0 | 1 | 0 |
| Case 106 | 6 | 162,994,422 | 163,273,193 | 1 | 1 | 2 | 0 |
| Case 106 | 6 | 163,273,326 | 167,277,976 | 2 | 1 | 3 | 0 |
| Case 106 | 6 | 167,279,331 | 167,373,708 | 1 | 1 | 2 | 0 |
| Case 106 | 6 | 167,383,075 | 170,980,171 | 2 | 1 | 3 | 0 |
| Case 106 | 7 | 44,935      | 58,019,061  | 2 | 1 | 3 | 0 |
| Case 106 | 7 | 61,056,053  | 61,852,895  | 2 | 1 | 3 | 0 |
| Case 106 | 7 | 61,994,170  | 62,517,629  | 1 | 1 | 2 | 0 |
| Case 106 | 7 | 62,527,743  | 66,728,987  | 2 | 1 | 3 | 0 |
| Case 106 | 7 | 66,765,880  | 66,901,285  | 1 | 1 | 2 | 0 |
| Case 106 | 7 | 66,901,317  | 74,482,604  | 2 | 1 | 3 | 0 |
| Case 106 | 7 | 74,486,465  | 75,182,802  | 2 | 0 | 2 | 1 |
| Case 106 | 7 | 75,182,887  | 91,029,468  | 2 | 1 | 3 | 0 |
| Case 106 | 7 | 91,033,074  | 91,038,222  | 1 | 0 | 1 | 0 |
| Case 106 | 7 | 91,043,217  | 100,417,409 | 2 | 1 | 3 | 0 |
| Case 106 | 7 | 100,419,998 | 100,473,729 | 1 | 1 | 2 | 0 |
| Case 106 | 7 | 100,474,289 | 100,675,128 | 2 | 1 | 3 | 0 |
| Case 106 | 7 | 100,675,164 | 100,686,491 | 1 | 1 | 2 | 0 |
| Case 106 | 7 | 100,686,498 | 110,511,679 | 2 | 1 | 3 | 0 |
| Case 106 | 7 | 110,514,428 | 111,080,241 | 1 | 0 | 1 | 0 |
| Case 106 | 7 | 111,092,478 | 122,376,318 | 2 | 1 | 3 | 0 |
| Case 106 | 7 | 122,392,897 | 122,520,343 | 1 | 1 | 2 | 0 |
| Case 106 | 7 | 122,522,740 | 140,198,246 | 2 | 1 | 3 | 0 |
| Case 106 | 7 | 140,209,941 | 140,397,792 | 1 | 1 | 2 | 0 |
| Case 106 | 7 | 140,402,382 | 146,639,472 | 2 | 1 | 3 | 0 |
| Case 106 | 7 | 146,642,350 | 147,292,345 | 2 | 0 | 2 | 1 |
| Case 106 | 7 | 147,292,995 | 157,421,108 | 2 | 1 | 3 | 0 |
| Case 106 | 7 | 157,426,990 | 157,714,638 | 2 | 0 | 2 | 1 |
| Case 106 | 7 | 157,718,481 | 159,119,486 | 2 | 1 | 3 | 0 |

|          |    |             |             |   |   |   |   |
|----------|----|-------------|-------------|---|---|---|---|
| Case 106 | 8  | 164,984     | 1,581,839   | 2 | 1 | 3 | 0 |
| Case 106 | 8  | 1,587,877   | 1,603,043   | 1 | 0 | 1 | 0 |
| Case 106 | 8  | 1,613,232   | 3,772,648   | 2 | 1 | 3 | 0 |
| Case 106 | 8  | 3,773,842   | 3,807,528   | 3 | 1 | 4 | 0 |
| Case 106 | 8  | 3,807,747   | 3,831,350   | 2 | 1 | 3 | 0 |
| Case 106 | 8  | 3,832,465   | 4,476,870   | 3 | 1 | 4 | 0 |
| Case 106 | 8  | 4,476,957   | 4,476,957   | 2 | 0 | 2 | 1 |
| Case 106 | 8  | 4,480,667   | 4,809,686   | 2 | 1 | 3 | 0 |
| Case 106 | 8  | 4,809,701   | 5,368,274   | 3 | 1 | 4 | 0 |
| Case 106 | 8  | 5,369,076   | 5,369,603   | 2 | 0 | 2 | 1 |
| Case 106 | 8  | 5,369,835   | 5,593,810   | 2 | 1 | 3 | 0 |
| Case 106 | 8  | 5,599,399   | 5,605,087   | 1 | 0 | 1 | 0 |
| Case 106 | 8  | 5,607,214   | 8,267,096   | 2 | 1 | 3 | 0 |
| Case 106 | 8  | 8,271,383   | 8,596,562   | 3 | 1 | 4 | 0 |
| Case 106 | 8  | 8,600,305   | 8,600,305   | 2 | 0 | 2 | 1 |
| Case 106 | 8  | 8,601,350   | 11,498,190  | 2 | 1 | 3 | 0 |
| Case 106 | 8  | 11,499,277  | 11,611,043  | 2 | 2 | 4 | 0 |
| Case 106 | 8  | 11,611,353  | 11,710,911  | 2 | 1 | 3 | 0 |
| Case 106 | 8  | 11,711,059  | 11,851,156  | 2 | 2 | 4 | 0 |
| Case 106 | 8  | 11,851,521  | 12,589,179  | 2 | 1 | 3 | 0 |
| Case 106 | 8  | 12,592,956  | 43,791,691  | 3 | 0 | 3 | 1 |
| Case 106 | 8  | 46,886,735  | 146,293,414 | 3 | 0 | 3 | 1 |
| Case 106 | 9  | 46,587      | 5,302,095   | 1 | 1 | 2 | 0 |
| Case 106 | 9  | 5,306,824   | 5,335,570   | 1 | 0 | 1 | 0 |
| Case 106 | 9  | 5,339,657   | 10,411,393  | 1 | 1 | 2 | 0 |
| Case 106 | 9  | 10,421,687  | 10,925,989  | 1 | 0 | 1 | 0 |
| Case 106 | 9  | 10,928,314  | 10,936,135  | 2 | 0 | 2 | 1 |
| Case 106 | 9  | 10,936,687  | 33,609,013  | 1 | 1 | 2 | 0 |
| Case 106 | 9  | 33,611,709  | 34,065,659  | 2 | 0 | 2 | 1 |
| Case 106 | 9  | 34,071,541  | 46,944,322  | 1 | 1 | 2 | 0 |
| Case 106 | 9  | 65,629,772  | 112,418,293 | 1 | 1 | 2 | 0 |
| Case 106 | 9  | 112,419,244 | 131,762,062 | 2 | 1 | 3 | 0 |
| Case 106 | 9  | 131,762,080 | 131,768,941 | 1 | 1 | 2 | 0 |
| Case 106 | 9  | 131,769,243 | 138,053,217 | 2 | 1 | 3 | 0 |
| Case 106 | 9  | 138,054,178 | 138,357,705 | 3 | 1 | 4 | 0 |
| Case 106 | 9  | 138,359,002 | 138,359,002 | 2 | 0 | 2 | 1 |
| Case 106 | 9  | 138,361,170 | 139,235,415 | 2 | 1 | 3 | 0 |
| Case 106 | 9  | 139,235,526 | 139,278,407 | 3 | 1 | 4 | 0 |
| Case 106 | 9  | 139,279,173 | 139,279,173 | 2 | 0 | 2 | 1 |
| Case 106 | 9  | 139,279,245 | 141,066,491 | 2 | 1 | 3 | 0 |
| Case 106 | 10 | 98,087      | 7,771,947   | 2 | 1 | 3 | 0 |
| Case 106 | 10 | 7,772,035   | 7,786,236   | 1 | 1 | 2 | 0 |
| Case 106 | 10 | 7,786,772   | 12,154,833  | 2 | 1 | 3 | 0 |
| Case 106 | 10 | 12,154,929  | 12,436,252  | 1 | 1 | 2 | 0 |
| Case 106 | 10 | 12,438,783  | 13,154,486  | 2 | 1 | 3 | 0 |
| Case 106 | 10 | 13,155,726  | 13,279,884  | 1 | 1 | 2 | 0 |
| Case 106 | 10 | 13,280,550  | 34,806,744  | 2 | 1 | 3 | 0 |
| Case 106 | 10 | 34,813,742  | 34,970,073  | 1 | 1 | 2 | 0 |
| Case 106 | 10 | 34,971,389  | 39,097,912  | 2 | 1 | 3 | 0 |
| Case 106 | 10 | 42,436,301  | 46,999,289  | 2 | 1 | 3 | 0 |
| Case 106 | 10 | 46,999,290  | 47,101,942  | 1 | 1 | 2 | 0 |
| Case 106 | 10 | 47,375,657  | 55,560,710  | 2 | 1 | 3 | 0 |
| Case 106 | 10 | 55,562,036  | 55,668,753  | 1 | 1 | 2 | 0 |
| Case 106 | 10 | 55,680,463  | 70,061,336  | 2 | 1 | 3 | 0 |
| Case 106 | 10 | 70,066,553  | 70,276,553  | 1 | 1 | 2 | 0 |
| Case 106 | 10 | 70,319,321  | 70,391,172  | 2 | 1 | 3 | 0 |
| Case 106 | 10 | 70,401,976  | 70,646,373  | 1 | 1 | 2 | 0 |
| Case 106 | 10 | 70,652,345  | 70,989,749  | 2 | 1 | 3 | 0 |
| Case 106 | 10 | 70,992,250  | 71,009,907  | 1 | 1 | 2 | 0 |
| Case 106 | 10 | 71,010,301  | 74,661,041  | 2 | 1 | 3 | 0 |
| Case 106 | 10 | 74,662,104  | 75,277,332  | 1 | 1 | 2 | 0 |

|          |    |             |             |   |   |   |   |
|----------|----|-------------|-------------|---|---|---|---|
| Case 106 | 10 | 75,277,450  | 93,999,956  | 2 | 1 | 3 | 0 |
| Case 106 | 10 | 94,002,116  | 94,523,766  | 1 | 1 | 2 | 0 |
| Case 106 | 10 | 94,525,174  | 104,162,970 | 2 | 1 | 3 | 0 |
| Case 106 | 10 | 104,163,153 | 104,843,148 | 1 | 1 | 2 | 0 |
| Case 106 | 10 | 104,846,178 | 129,900,859 | 2 | 1 | 3 | 0 |
| Case 106 | 10 | 129,901,084 | 129,907,610 | 1 | 1 | 2 | 0 |
| Case 106 | 10 | 129,907,631 | 135,477,883 | 2 | 1 | 3 | 0 |
| Case 106 | 11 | 193,146     | 236,091     | 2 | 1 | 3 | 0 |
| Case 106 | 11 | 236,306     | 292,060     | 2 | 2 | 4 | 0 |
| Case 106 | 11 | 292,667     | 325,800     | 2 | 1 | 3 | 0 |
| Case 106 | 11 | 327,334     | 370,831     | 2 | 2 | 4 | 0 |
| Case 106 | 11 | 371,265     | 1,298,430   | 2 | 1 | 3 | 0 |
| Case 106 | 11 | 1,300,406   | 1,404,838   | 2 | 2 | 4 | 0 |
| Case 106 | 11 | 1,405,829   | 1,507,731   | 2 | 1 | 3 | 0 |
| Case 106 | 11 | 1,515,271   | 1,693,052   | 2 | 2 | 4 | 0 |
| Case 106 | 11 | 1,696,849   | 1,804,417   | 2 | 1 | 3 | 0 |
| Case 106 | 11 | 1,807,114   | 2,306,339   | 2 | 2 | 4 | 0 |
| Case 106 | 11 | 2,308,762   | 2,349,462   | 2 | 1 | 3 | 0 |
| Case 106 | 11 | 2,364,234   | 2,420,500   | 2 | 2 | 4 | 0 |
| Case 106 | 11 | 2,423,820   | 2,444,215   | 2 | 1 | 3 | 0 |
| Case 106 | 11 | 2,444,239   | 2,863,820   | 2 | 2 | 4 | 0 |
| Case 106 | 11 | 2,868,259   | 2,922,493   | 2 | 1 | 3 | 0 |
| Case 106 | 11 | 2,923,091   | 2,943,115   | 2 | 2 | 4 | 0 |
| Case 106 | 11 | 2,943,342   | 3,141,848   | 2 | 1 | 3 | 0 |
| Case 106 | 11 | 3,143,030   | 3,215,318   | 2 | 2 | 4 | 0 |
| Case 106 | 11 | 3,216,129   | 3,249,972   | 2 | 1 | 3 | 0 |
| Case 106 | 11 | 3,249,984   | 3,645,133   | 2 | 2 | 4 | 0 |
| Case 106 | 11 | 3,645,345   | 3,727,756   | 2 | 1 | 3 | 0 |
| Case 106 | 11 | 3,729,676   | 3,993,231   | 2 | 2 | 4 | 0 |
| Case 106 | 11 | 4,011,806   | 4,471,445   | 2 | 1 | 3 | 0 |
| Case 106 | 11 | 4,471,469   | 4,563,233   | 2 | 2 | 4 | 0 |
| Case 106 | 11 | 4,563,728   | 5,088,772   | 2 | 1 | 3 | 0 |
| Case 106 | 11 | 5,089,017   | 5,149,332   | 2 | 2 | 4 | 0 |
| Case 106 | 11 | 5,150,372   | 5,258,162   | 2 | 1 | 3 | 0 |
| Case 106 | 11 | 5,258,592   | 5,275,343   | 2 | 2 | 4 | 0 |
| Case 106 | 11 | 5,279,153   | 5,328,361   | 2 | 1 | 3 | 0 |
| Case 106 | 11 | 5,328,707   | 5,344,561   | 2 | 2 | 4 | 0 |
| Case 106 | 11 | 5,344,592   | 6,191,531   | 2 | 1 | 3 | 0 |
| Case 106 | 11 | 6,192,443   | 6,220,713   | 2 | 2 | 4 | 0 |
| Case 106 | 11 | 6,220,820   | 6,717,557   | 2 | 1 | 3 | 0 |
| Case 106 | 11 | 6,717,608   | 6,789,257   | 2 | 2 | 4 | 0 |
| Case 106 | 11 | 6,789,287   | 6,964,873   | 2 | 1 | 3 | 0 |
| Case 106 | 11 | 6,965,652   | 7,001,786   | 2 | 2 | 4 | 0 |
| Case 106 | 11 | 7,008,962   | 7,187,367   | 2 | 1 | 3 | 0 |
| Case 106 | 11 | 7,188,457   | 7,272,397   | 2 | 2 | 4 | 0 |
| Case 106 | 11 | 7,278,278   | 7,707,101   | 2 | 1 | 3 | 0 |
| Case 106 | 11 | 7,707,958   | 7,716,305   | 2 | 2 | 4 | 0 |
| Case 106 | 11 | 7,716,331   | 7,890,697   | 2 | 1 | 3 | 0 |
| Case 106 | 11 | 7,891,039   | 7,914,606   | 2 | 2 | 4 | 0 |
| Case 106 | 11 | 7,914,932   | 8,390,147   | 2 | 1 | 3 | 0 |
| Case 106 | 11 | 8,391,230   | 8,658,485   | 2 | 2 | 4 | 0 |
| Case 106 | 11 | 8,660,223   | 8,753,729   | 2 | 1 | 3 | 0 |
| Case 106 | 11 | 8,758,114   | 8,933,004   | 2 | 2 | 4 | 0 |
| Case 106 | 11 | 8,933,010   | 12,429,493  | 2 | 1 | 3 | 0 |
| Case 106 | 11 | 12,431,361  | 12,662,120  | 2 | 2 | 4 | 0 |
| Case 106 | 11 | 12,679,245  | 12,935,451  | 2 | 1 | 3 | 0 |
| Case 106 | 11 | 12,940,196  | 13,913,003  | 2 | 2 | 4 | 0 |
| Case 106 | 11 | 13,917,687  | 14,502,339  | 2 | 1 | 3 | 0 |
| Case 106 | 11 | 14,504,463  | 14,975,698  | 2 | 2 | 4 | 0 |
| Case 106 | 11 | 14,988,713  | 15,198,685  | 2 | 1 | 3 | 0 |
| Case 106 | 11 | 15,198,772  | 15,979,045  | 2 | 2 | 4 | 0 |

|          |    |            |            |   |   |   |   |
|----------|----|------------|------------|---|---|---|---|
| Case 106 | 11 | 15,985,282 | 16,200,444 | 2 | 1 | 3 | 0 |
| Case 106 | 11 | 16,211,343 | 16,308,668 | 2 | 2 | 4 | 0 |
| Case 106 | 11 | 16,327,983 | 17,260,116 | 2 | 1 | 3 | 0 |
| Case 106 | 11 | 17,267,029 | 17,415,261 | 2 | 2 | 4 | 0 |
| Case 106 | 11 | 17,415,289 | 17,531,995 | 2 | 1 | 3 | 0 |
| Case 106 | 11 | 17,532,052 | 17,723,296 | 2 | 2 | 4 | 0 |
| Case 106 | 11 | 17,726,305 | 17,847,381 | 2 | 1 | 3 | 0 |
| Case 106 | 11 | 17,851,342 | 17,988,860 | 2 | 2 | 4 | 0 |
| Case 106 | 11 | 18,001,888 | 18,051,096 | 2 | 1 | 3 | 0 |
| Case 106 | 11 | 18,051,104 | 18,108,512 | 2 | 2 | 4 | 0 |
| Case 106 | 11 | 18,108,566 | 18,973,545 | 2 | 1 | 3 | 0 |
| Case 106 | 11 | 18,974,860 | 19,188,122 | 2 | 2 | 4 | 0 |
| Case 106 | 11 | 19,188,485 | 19,711,993 | 2 | 1 | 3 | 0 |
| Case 106 | 11 | 19,712,486 | 19,955,194 | 2 | 2 | 4 | 0 |
| Case 106 | 11 | 19,955,271 | 20,213,955 | 2 | 1 | 3 | 0 |
| Case 106 | 11 | 20,219,834 | 20,292,495 | 2 | 2 | 4 | 0 |
| Case 106 | 11 | 20,296,378 | 20,404,703 | 2 | 1 | 3 | 0 |
| Case 106 | 11 | 20,405,135 | 20,529,886 | 2 | 2 | 4 | 0 |
| Case 106 | 11 | 20,529,892 | 20,676,326 | 2 | 1 | 3 | 0 |
| Case 106 | 11 | 20,678,604 | 21,016,295 | 2 | 2 | 4 | 0 |
| Case 106 | 11 | 21,017,397 | 21,049,960 | 2 | 1 | 3 | 0 |
| Case 106 | 11 | 21,052,712 | 21,520,402 | 2 | 2 | 4 | 0 |
| Case 106 | 11 | 21,522,529 | 21,669,293 | 2 | 1 | 3 | 0 |
| Case 106 | 11 | 21,674,597 | 22,016,670 | 2 | 2 | 4 | 0 |
| Case 106 | 11 | 22,024,184 | 22,387,179 | 2 | 1 | 3 | 0 |
| Case 106 | 11 | 22,387,745 | 22,477,620 | 2 | 2 | 4 | 0 |
| Case 106 | 11 | 22,481,749 | 22,700,825 | 2 | 1 | 3 | 0 |
| Case 106 | 11 | 22,707,296 | 23,099,792 | 2 | 2 | 4 | 0 |
| Case 106 | 11 | 23,102,000 | 23,224,901 | 2 | 1 | 3 | 0 |
| Case 106 | 11 | 23,226,964 | 23,460,111 | 2 | 2 | 4 | 0 |
| Case 106 | 11 | 23,460,491 | 23,718,743 | 2 | 1 | 3 | 0 |
| Case 106 | 11 | 23,723,766 | 25,154,378 | 2 | 2 | 4 | 0 |
| Case 106 | 11 | 25,157,728 | 25,529,663 | 2 | 1 | 3 | 0 |
| Case 106 | 11 | 25,529,987 | 26,035,814 | 2 | 2 | 4 | 0 |
| Case 106 | 11 | 26,038,571 | 26,587,350 | 2 | 1 | 3 | 0 |
| Case 106 | 11 | 26,587,423 | 26,717,345 | 2 | 2 | 4 | 0 |
| Case 106 | 11 | 26,718,732 | 26,770,983 | 2 | 1 | 3 | 0 |
| Case 106 | 11 | 26,771,794 | 27,337,843 | 2 | 2 | 4 | 0 |
| Case 106 | 11 | 27,339,168 | 27,451,759 | 2 | 1 | 3 | 0 |
| Case 106 | 11 | 27,456,059 | 28,697,941 | 2 | 2 | 4 | 0 |
| Case 106 | 11 | 28,697,951 | 29,147,594 | 2 | 1 | 3 | 0 |
| Case 106 | 11 | 29,158,671 | 29,312,842 | 2 | 2 | 4 | 0 |
| Case 106 | 11 | 29,316,153 | 29,675,343 | 2 | 1 | 3 | 0 |
| Case 106 | 11 | 29,680,576 | 30,032,307 | 2 | 2 | 4 | 0 |
| Case 106 | 11 | 30,032,402 | 30,352,557 | 2 | 1 | 3 | 0 |
| Case 106 | 11 | 30,353,725 | 30,640,248 | 2 | 2 | 4 | 0 |
| Case 106 | 11 | 30,647,282 | 30,837,794 | 2 | 1 | 3 | 0 |
| Case 106 | 11 | 30,838,689 | 30,873,739 | 2 | 2 | 4 | 0 |
| Case 106 | 11 | 30,875,674 | 31,229,804 | 2 | 1 | 3 | 0 |
| Case 106 | 11 | 31,230,540 | 31,936,515 | 2 | 2 | 4 | 0 |
| Case 106 | 11 | 31,937,936 | 32,421,273 | 2 | 1 | 3 | 0 |
| Case 106 | 11 | 32,423,752 | 32,603,285 | 2 | 2 | 4 | 0 |
| Case 106 | 11 | 32,604,045 | 33,757,770 | 2 | 1 | 3 | 0 |
| Case 106 | 11 | 33,758,638 | 33,949,342 | 2 | 2 | 4 | 0 |
| Case 106 | 11 | 33,954,193 | 34,680,053 | 2 | 1 | 3 | 0 |
| Case 106 | 11 | 34,680,109 | 35,163,114 | 2 | 2 | 4 | 0 |
| Case 106 | 11 | 35,167,359 | 35,497,059 | 2 | 1 | 3 | 0 |
| Case 106 | 11 | 35,500,592 | 36,025,118 | 2 | 2 | 4 | 0 |
| Case 106 | 11 | 36,028,475 | 36,923,515 | 2 | 1 | 3 | 0 |
| Case 106 | 11 | 36,938,773 | 37,757,910 | 2 | 2 | 4 | 0 |
| Case 106 | 11 | 37,758,393 | 38,271,205 | 2 | 1 | 3 | 0 |

|          |    |            |            |   |   |   |   |
|----------|----|------------|------------|---|---|---|---|
| Case 106 | 11 | 38,285,501 | 39,666,972 | 2 | 2 | 4 | 0 |
| Case 106 | 11 | 39,667,117 | 39,981,948 | 2 | 1 | 3 | 0 |
| Case 106 | 11 | 39,997,451 | 40,105,120 | 2 | 2 | 4 | 0 |
| Case 106 | 11 | 40,105,881 | 40,527,150 | 2 | 1 | 3 | 0 |
| Case 106 | 11 | 40,530,245 | 40,781,345 | 2 | 2 | 4 | 0 |
| Case 106 | 11 | 40,783,291 | 40,980,698 | 2 | 1 | 3 | 0 |
| Case 106 | 11 | 40,981,020 | 41,069,095 | 2 | 2 | 4 | 0 |
| Case 106 | 11 | 41,070,348 | 41,226,338 | 2 | 1 | 3 | 0 |
| Case 106 | 11 | 41,226,389 | 41,411,565 | 2 | 2 | 4 | 0 |
| Case 106 | 11 | 41,413,943 | 41,631,862 | 2 | 1 | 3 | 0 |
| Case 106 | 11 | 41,632,353 | 42,385,511 | 2 | 2 | 4 | 0 |
| Case 106 | 11 | 42,391,385 | 42,523,366 | 2 | 1 | 3 | 0 |
| Case 106 | 11 | 42,543,277 | 43,137,342 | 2 | 2 | 4 | 0 |
| Case 106 | 11 | 43,138,659 | 43,749,199 | 2 | 1 | 3 | 0 |
| Case 106 | 11 | 43,755,780 | 43,864,278 | 2 | 2 | 4 | 0 |
| Case 106 | 11 | 43,873,539 | 44,023,161 | 2 | 1 | 3 | 0 |
| Case 106 | 11 | 44,025,878 | 44,063,841 | 2 | 2 | 4 | 0 |
| Case 106 | 11 | 44,066,354 | 44,289,071 | 2 | 1 | 3 | 0 |
| Case 106 | 11 | 44,290,066 | 44,344,634 | 2 | 2 | 4 | 0 |
| Case 106 | 11 | 44,348,056 | 44,449,800 | 2 | 1 | 3 | 0 |
| Case 106 | 11 | 44,450,995 | 44,542,441 | 2 | 2 | 4 | 0 |
| Case 106 | 11 | 44,547,746 | 44,701,444 | 2 | 1 | 3 | 0 |
| Case 106 | 11 | 44,702,928 | 44,796,843 | 2 | 2 | 4 | 0 |
| Case 106 | 11 | 44,797,486 | 44,982,802 | 2 | 1 | 3 | 0 |
| Case 106 | 11 | 44,985,620 | 45,044,671 | 2 | 2 | 4 | 0 |
| Case 106 | 11 | 45,045,189 | 45,672,230 | 2 | 1 | 3 | 0 |
| Case 106 | 11 | 45,672,261 | 45,827,578 | 2 | 2 | 4 | 0 |
| Case 106 | 11 | 45,827,606 | 48,373,762 | 2 | 1 | 3 | 0 |
| Case 106 | 11 | 48,373,827 | 48,457,439 | 1 | 1 | 2 | 0 |
| Case 106 | 11 | 48,476,690 | 49,214,394 | 2 | 1 | 3 | 0 |
| Case 106 | 11 | 49,221,914 | 49,965,330 | 2 | 2 | 4 | 0 |
| Case 106 | 11 | 49,974,473 | 50,057,854 | 2 | 1 | 3 | 0 |
| Case 106 | 11 | 50,070,332 | 50,345,390 | 2 | 2 | 4 | 0 |
| Case 106 | 11 | 50,345,592 | 51,591,253 | 2 | 1 | 3 | 0 |
| Case 106 | 11 | 54,794,237 | 55,361,808 | 2 | 1 | 3 | 0 |
| Case 106 | 11 | 55,362,955 | 55,432,668 | 1 | 1 | 2 | 0 |
| Case 106 | 11 | 55,432,740 | 55,437,126 | 2 | 1 | 3 | 0 |
| Case 106 | 11 | 55,445,294 | 55,523,833 | 2 | 2 | 4 | 0 |
| Case 106 | 11 | 55,533,365 | 56,468,681 | 2 | 1 | 3 | 0 |
| Case 106 | 11 | 56,468,694 | 56,508,686 | 2 | 2 | 4 | 0 |
| Case 106 | 11 | 56,510,405 | 56,511,104 | 2 | 1 | 3 | 0 |
| Case 106 | 11 | 56,511,160 | 56,905,911 | 2 | 2 | 4 | 0 |
| Case 106 | 11 | 56,905,977 | 57,004,322 | 2 | 1 | 3 | 0 |
| Case 106 | 11 | 57,004,344 | 57,062,509 | 2 | 2 | 4 | 0 |
| Case 106 | 11 | 57,065,220 | 58,055,186 | 2 | 1 | 3 | 0 |
| Case 106 | 11 | 58,057,129 | 58,125,865 | 2 | 2 | 4 | 0 |
| Case 106 | 11 | 58,125,873 | 58,724,149 | 2 | 1 | 3 | 0 |
| Case 106 | 11 | 58,724,381 | 58,883,915 | 2 | 2 | 4 | 0 |
| Case 106 | 11 | 58,888,323 | 58,980,311 | 2 | 1 | 3 | 0 |
| Case 106 | 11 | 58,981,586 | 59,184,192 | 2 | 2 | 4 | 0 |
| Case 106 | 11 | 59,189,405 | 59,801,882 | 2 | 1 | 3 | 0 |
| Case 106 | 11 | 59,807,380 | 59,826,857 | 2 | 2 | 4 | 0 |
| Case 106 | 11 | 59,827,800 | 59,975,400 | 2 | 1 | 3 | 0 |
| Case 106 | 11 | 59,977,646 | 60,107,470 | 2 | 2 | 4 | 0 |
| Case 106 | 11 | 60,107,660 | 60,237,234 | 2 | 1 | 3 | 0 |
| Case 106 | 11 | 60,237,410 | 60,311,123 | 2 | 2 | 4 | 0 |
| Case 106 | 11 | 60,311,515 | 61,809,694 | 2 | 1 | 3 | 0 |
| Case 106 | 11 | 61,815,803 | 61,897,359 | 2 | 2 | 4 | 0 |
| Case 106 | 11 | 61,897,396 | 61,930,617 | 2 | 1 | 3 | 0 |
| Case 106 | 11 | 61,940,106 | 62,064,505 | 2 | 2 | 4 | 0 |
| Case 106 | 11 | 62,064,715 | 62,786,435 | 2 | 1 | 3 | 0 |

|          |    |             |             |   |   |   |   |
|----------|----|-------------|-------------|---|---|---|---|
| Case 106 | 11 | 62,788,269  | 62,913,852  | 2 | 2 | 4 | 0 |
| Case 106 | 11 | 62,914,847  | 63,072,310  | 2 | 1 | 3 | 0 |
| Case 106 | 11 | 63,072,327  | 63,141,254  | 2 | 2 | 4 | 0 |
| Case 106 | 11 | 63,141,435  | 89,017,961  | 2 | 1 | 3 | 0 |
| Case 106 | 11 | 89,020,498  | 89,153,765  | 3 | 0 | 3 | 1 |
| Case 106 | 11 | 89,156,429  | 89,179,077  | 2 | 0 | 2 | 1 |
| Case 106 | 11 | 89,182,275  | 97,297,218  | 2 | 1 | 3 | 0 |
| Case 106 | 11 | 97,299,826  | 97,435,372  | 3 | 1 | 4 | 0 |
| Case 106 | 11 | 97,439,081  | 97,439,081  | 2 | 0 | 2 | 1 |
| Case 106 | 11 | 97,443,131  | 127,087,754 | 2 | 1 | 3 | 0 |
| Case 106 | 11 | 127,091,963 | 128,562,098 | 3 | 1 | 4 | 0 |
| Case 106 | 11 | 128,563,413 | 128,563,413 | 2 | 0 | 2 | 1 |
| Case 106 | 11 | 128,564,794 | 128,846,528 | 2 | 1 | 3 | 0 |
| Case 106 | 11 | 128,850,539 | 129,251,227 | 3 | 1 | 4 | 0 |
| Case 106 | 11 | 129,251,792 | 129,251,792 | 2 | 0 | 2 | 1 |
| Case 106 | 11 | 129,251,976 | 130,699,110 | 2 | 1 | 3 | 0 |
| Case 106 | 11 | 130,699,300 | 130,890,970 | 3 | 1 | 4 | 0 |
| Case 106 | 11 | 130,891,895 | 132,488,048 | 2 | 1 | 3 | 0 |
| Case 106 | 11 | 132,492,326 | 132,574,789 | 3 | 1 | 4 | 0 |
| Case 106 | 11 | 132,576,264 | 132,576,264 | 2 | 0 | 2 | 1 |
| Case 106 | 11 | 132,576,546 | 134,934,063 | 2 | 1 | 3 | 0 |
| Case 106 | 12 | 191,619     | 8,281,876   | 1 | 1 | 2 | 0 |
| Case 106 | 12 | 8,288,179   | 8,374,746   | 1 | 0 | 1 | 0 |
| Case 106 | 12 | 8,376,070   | 33,769,090  | 1 | 1 | 2 | 0 |
| Case 106 | 12 | 33,778,489  | 34,506,968  | 2 | 0 | 2 | 1 |
| Case 106 | 12 | 34,523,378  | 34,853,011  | 1 | 0 | 1 | 0 |
| Case 106 | 12 | 37,876,400  | 38,347,638  | 1 | 0 | 1 | 0 |
| Case 106 | 12 | 38,359,611  | 38,714,185  | 2 | 0 | 2 | 1 |
| Case 106 | 12 | 38,714,351  | 40,182,606  | 1 | 1 | 2 | 0 |
| Case 106 | 12 | 40,192,820  | 40,328,684  | 1 | 0 | 1 | 0 |
| Case 106 | 12 | 40,328,757  | 133,628,903 | 1 | 1 | 2 | 0 |
| Case 106 | 12 | 133,633,536 | 133,810,935 | 2 | 0 | 2 | 1 |
| Case 106 | 13 | 19,058,717  | 33,760,737  | 2 | 0 | 2 | 1 |
| Case 106 | 13 | 33,761,410  | 33,946,244  | 1 | 0 | 1 | 0 |
| Case 106 | 13 | 33,947,222  | 36,975,462  | 2 | 0 | 2 | 1 |
| Case 106 | 13 | 36,984,915  | 37,031,396  | 1 | 0 | 1 | 0 |
| Case 106 | 13 | 37,033,342  | 41,842,546  | 2 | 0 | 2 | 1 |
| Case 106 | 13 | 41,842,561  | 44,482,204  | 1 | 1 | 2 | 0 |
| Case 106 | 13 | 44,493,527  | 44,734,696  | 2 | 0 | 2 | 1 |
| Case 106 | 13 | 44,735,517  | 44,796,982  | 1 | 0 | 1 | 0 |
| Case 106 | 13 | 44,798,197  | 44,981,909  | 2 | 0 | 2 | 1 |
| Case 106 | 13 | 45,000,340  | 45,147,990  | 1 | 0 | 1 | 0 |
| Case 106 | 13 | 45,148,257  | 45,150,135  | 2 | 0 | 2 | 1 |
| Case 106 | 13 | 45,178,744  | 45,429,434  | 1 | 0 | 1 | 0 |
| Case 106 | 13 | 45,433,561  | 45,544,325  | 2 | 0 | 2 | 1 |
| Case 106 | 13 | 45,548,000  | 73,343,046  | 1 | 1 | 2 | 0 |
| Case 106 | 13 | 73,345,274  | 74,283,131  | 1 | 0 | 1 | 0 |
| Case 106 | 13 | 74,288,499  | 86,499,673  | 1 | 1 | 2 | 0 |
| Case 106 | 13 | 86,505,542  | 86,521,995  | 1 | 0 | 1 | 0 |
| Case 106 | 13 | 86,535,664  | 115,103,529 | 1 | 1 | 2 | 0 |
| Case 106 | 14 | 19,280,733  | 20,214,907  | 1 | 0 | 1 | 0 |
| Case 106 | 14 | 20,215,615  | 20,345,087  | 2 | 0 | 2 | 1 |
| Case 106 | 14 | 20,345,088  | 20,345,142  | 1 | 1 | 2 | 0 |
| Case 106 | 14 | 20,345,205  | 20,389,115  | 1 | 0 | 1 | 0 |
| Case 106 | 14 | 20,389,177  | 20,404,614  | 1 | 1 | 2 | 0 |
| Case 106 | 14 | 20,404,671  | 20,844,383  | 1 | 0 | 1 | 0 |
| Case 106 | 14 | 20,845,770  | 20,850,871  | 2 | 0 | 2 | 1 |
| Case 106 | 14 | 20,851,708  | 21,068,103  | 1 | 0 | 1 | 0 |
| Case 106 | 14 | 21,069,321  | 21,128,336  | 2 | 0 | 2 | 1 |
| Case 106 | 14 | 21,130,632  | 21,215,805  | 1 | 0 | 1 | 0 |
| Case 106 | 14 | 21,215,808  | 21,238,862  | 2 | 0 | 2 | 1 |

|          |    |            |             |   |   |   |   |
|----------|----|------------|-------------|---|---|---|---|
| Case 106 | 14 | 21,240,597 | 21,344,168  | 1 | 0 | 1 | 0 |
| Case 106 | 14 | 21,345,707 | 21,426,282  | 2 | 0 | 2 | 1 |
| Case 106 | 14 | 21,430,269 | 21,466,781  | 1 | 0 | 1 | 0 |
| Case 106 | 14 | 21,467,909 | 21,529,064  | 2 | 0 | 2 | 1 |
| Case 106 | 14 | 21,529,197 | 22,094,954  | 1 | 0 | 1 | 0 |
| Case 106 | 14 | 22,098,295 | 22,103,595  | 2 | 0 | 2 | 1 |
| Case 106 | 14 | 22,112,594 | 22,130,428  | 1 | 0 | 1 | 0 |
| Case 106 | 14 | 22,132,807 | 22,133,997  | 2 | 0 | 2 | 1 |
| Case 106 | 14 | 22,134,005 | 22,387,318  | 1 | 0 | 1 | 0 |
| Case 106 | 14 | 22,387,839 | 23,081,528  | 2 | 0 | 2 | 1 |
| Case 106 | 14 | 23,081,926 | 23,233,971  | 1 | 0 | 1 | 0 |
| Case 106 | 14 | 23,235,808 | 23,243,191  | 2 | 0 | 2 | 1 |
| Case 106 | 14 | 23,243,680 | 23,521,721  | 1 | 0 | 1 | 0 |
| Case 106 | 14 | 23,521,802 | 23,549,850  | 2 | 0 | 2 | 1 |
| Case 106 | 14 | 23,549,948 | 23,586,700  | 1 | 0 | 1 | 0 |
| Case 106 | 14 | 23,587,231 | 23,612,489  | 2 | 0 | 2 | 1 |
| Case 106 | 14 | 23,612,586 | 23,737,522  | 1 | 0 | 1 | 0 |
| Case 106 | 14 | 23,740,238 | 23,779,877  | 2 | 0 | 2 | 1 |
| Case 106 | 14 | 23,780,222 | 23,829,080  | 1 | 0 | 1 | 0 |
| Case 106 | 14 | 23,829,164 | 23,986,009  | 2 | 0 | 2 | 1 |
| Case 106 | 14 | 23,987,437 | 24,327,790  | 1 | 0 | 1 | 0 |
| Case 106 | 14 | 24,336,007 | 24,484,060  | 2 | 0 | 2 | 1 |
| Case 106 | 14 | 24,501,100 | 24,568,395  | 1 | 0 | 1 | 0 |
| Case 106 | 14 | 24,568,855 | 24,573,156  | 2 | 0 | 2 | 1 |
| Case 106 | 14 | 24,577,185 | 24,607,454  | 1 | 0 | 1 | 0 |
| Case 106 | 14 | 24,607,804 | 24,647,852  | 2 | 0 | 2 | 1 |
| Case 106 | 14 | 24,649,076 | 24,653,960  | 1 | 0 | 1 | 0 |
| Case 106 | 14 | 24,654,115 | 24,731,278  | 2 | 0 | 2 | 1 |
| Case 106 | 14 | 24,731,314 | 24,732,474  | 1 | 0 | 1 | 0 |
| Case 106 | 14 | 24,734,645 | 24,798,663  | 2 | 0 | 2 | 1 |
| Case 106 | 14 | 24,798,738 | 24,841,801  | 1 | 0 | 1 | 0 |
| Case 106 | 14 | 24,842,498 | 24,872,917  | 2 | 0 | 2 | 1 |
| Case 106 | 14 | 24,873,585 | 24,885,382  | 1 | 0 | 1 | 0 |
| Case 106 | 14 | 24,885,606 | 24,906,515  | 2 | 0 | 2 | 1 |
| Case 106 | 14 | 24,907,288 | 24,967,820  | 1 | 0 | 1 | 0 |
| Case 106 | 14 | 24,974,621 | 25,101,706  | 2 | 0 | 2 | 1 |
| Case 106 | 14 | 25,102,160 | 25,162,082  | 1 | 0 | 1 | 0 |
| Case 106 | 14 | 25,162,662 | 25,295,551  | 2 | 0 | 2 | 1 |
| Case 106 | 14 | 25,300,510 | 33,912,069  | 1 | 0 | 1 | 0 |
| Case 106 | 14 | 33,913,395 | 33,972,853  | 2 | 0 | 2 | 1 |
| Case 106 | 14 | 33,975,893 | 34,068,701  | 1 | 0 | 1 | 0 |
| Case 106 | 14 | 34,070,758 | 34,136,700  | 2 | 0 | 2 | 1 |
| Case 106 | 14 | 34,140,885 | 34,569,187  | 1 | 0 | 1 | 0 |
| Case 106 | 14 | 34,570,026 | 107,287,663 | 2 | 0 | 2 | 1 |
| Case 106 | 15 | 20,034,919 | 24,193,582  | 2 | 1 | 3 | 0 |
| Case 106 | 15 | 24,196,452 | 24,326,784  | 2 | 2 | 4 | 0 |
| Case 106 | 15 | 24,326,977 | 26,182,017  | 2 | 1 | 3 | 0 |
| Case 106 | 15 | 26,185,133 | 26,229,793  | 2 | 2 | 4 | 0 |
| Case 106 | 15 | 26,230,370 | 26,337,076  | 2 | 1 | 3 | 0 |
| Case 106 | 15 | 26,342,740 | 26,549,142  | 2 | 2 | 4 | 0 |
| Case 106 | 15 | 26,559,043 | 26,961,861  | 2 | 1 | 3 | 0 |
| Case 106 | 15 | 26,967,522 | 27,188,459  | 2 | 2 | 4 | 0 |
| Case 106 | 15 | 27,189,655 | 27,222,824  | 2 | 1 | 3 | 0 |
| Case 106 | 15 | 27,228,346 | 27,290,231  | 2 | 2 | 4 | 0 |
| Case 106 | 15 | 27,290,638 | 27,849,304  | 2 | 1 | 3 | 0 |
| Case 106 | 15 | 27,850,666 | 27,883,641  | 2 | 2 | 4 | 0 |
| Case 106 | 15 | 27,887,347 | 29,561,866  | 2 | 1 | 3 | 0 |
| Case 106 | 15 | 29,562,640 | 29,848,687  | 2 | 2 | 4 | 0 |
| Case 106 | 15 | 29,852,637 | 30,203,966  | 2 | 1 | 3 | 0 |
| Case 106 | 15 | 30,205,176 | 30,366,247  | 2 | 2 | 4 | 0 |
| Case 106 | 15 | 30,369,914 | 32,303,657  | 2 | 1 | 3 | 0 |



|          |    |            |            |   |   |   |   |
|----------|----|------------|------------|---|---|---|---|
| Case 106 | 15 | 32,309,184 | 34,671,124 | 2 | 0 | 2 | 1 |
| Case 106 | 15 | 34,718,594 | 34,800,595 | 0 | 0 | 0 | 0 |
| Case 106 | 15 | 34,871,296 | 44,574,649 | 2 | 0 | 2 | 1 |
| Case 106 | 15 | 44,579,854 | 46,273,935 | 2 | 1 | 3 | 0 |
| Case 106 | 15 | 46,274,275 | 47,407,214 | 2 | 2 | 4 | 0 |
| Case 106 | 15 | 47,408,195 | 47,601,553 | 2 | 1 | 3 | 0 |
| Case 106 | 15 | 47,613,403 | 48,013,174 | 2 | 2 | 4 | 0 |
| Case 106 | 15 | 48,015,116 | 48,132,379 | 2 | 1 | 3 | 0 |
| Case 106 | 15 | 48,133,686 | 49,090,175 | 2 | 0 | 2 | 1 |
| Case 106 | 15 | 49,093,824 | 49,912,768 | 2 | 1 | 3 | 0 |
| Case 106 | 15 | 49,912,946 | 50,193,553 | 2 | 2 | 4 | 0 |
| Case 106 | 15 | 50,195,344 | 50,352,945 | 2 | 1 | 3 | 0 |
| Case 106 | 15 | 50,353,277 | 50,469,288 | 2 | 2 | 4 | 0 |
| Case 106 | 15 | 50,471,827 | 51,201,108 | 2 | 1 | 3 | 0 |
| Case 106 | 15 | 51,207,205 | 51,569,410 | 2 | 2 | 4 | 0 |
| Case 106 | 15 | 51,572,037 | 52,835,262 | 2 | 1 | 3 | 0 |
| Case 106 | 15 | 52,842,904 | 53,020,933 | 2 | 2 | 4 | 0 |
| Case 106 | 15 | 53,038,488 | 53,252,041 | 2 | 1 | 3 | 0 |
| Case 106 | 15 | 53,257,894 | 53,828,686 | 2 | 2 | 4 | 0 |
| Case 106 | 15 | 53,839,779 | 53,995,635 | 2 | 1 | 3 | 0 |
| Case 106 | 15 | 53,997,338 | 54,212,245 | 2 | 2 | 4 | 0 |
| Case 106 | 15 | 54,214,720 | 54,226,685 | 2 | 1 | 3 | 0 |
| Case 106 | 15 | 54,236,339 | 87,848,502 | 2 | 0 | 2 | 1 |
| Case 106 | 15 | 87,857,559 | 88,052,767 | 2 | 1 | 3 | 0 |
| Case 106 | 15 | 88,066,218 | 88,359,182 | 2 | 2 | 4 | 0 |
| Case 106 | 15 | 88,361,622 | 88,820,429 | 2 | 1 | 3 | 0 |
| Case 106 | 15 | 88,820,515 | 88,920,678 | 2 | 2 | 4 | 0 |
| Case 106 | 15 | 88,924,722 | 89,021,200 | 2 | 1 | 3 | 0 |
| Case 106 | 15 | 89,033,668 | 89,378,258 | 2 | 2 | 4 | 0 |
| Case 106 | 15 | 89,378,395 | 89,395,209 | 2 | 1 | 3 | 0 |
| Case 106 | 15 | 89,395,259 | 89,408,081 | 2 | 2 | 4 | 0 |
| Case 106 | 15 | 89,412,279 | 89,870,432 | 2 | 1 | 3 | 0 |
| Case 106 | 15 | 89,871,763 | 90,060,811 | 2 | 2 | 4 | 0 |
| Case 106 | 15 | 90,064,593 | 90,225,743 | 2 | 1 | 3 | 0 |
| Case 106 | 15 | 90,226,687 | 90,333,565 | 2 | 2 | 4 | 0 |
| Case 106 | 15 | 90,333,851 | 91,045,408 | 2 | 1 | 3 | 0 |
| Case 106 | 15 | 91,045,419 | 91,143,805 | 2 | 2 | 4 | 0 |
| Case 106 | 15 | 91,144,587 | 91,892,493 | 2 | 1 | 3 | 0 |
| Case 106 | 15 | 91,895,484 | 92,073,658 | 2 | 2 | 4 | 0 |
| Case 106 | 15 | 92,075,814 | 92,215,680 | 2 | 1 | 3 | 0 |
| Case 106 | 15 | 92,217,898 | 92,369,620 | 2 | 2 | 4 | 0 |
| Case 106 | 15 | 92,378,489 | 92,513,406 | 2 | 1 | 3 | 0 |
| Case 106 | 15 | 92,515,062 | 92,623,670 | 2 | 2 | 4 | 0 |
| Case 106 | 15 | 92,623,840 | 92,652,336 | 2 | 1 | 3 | 0 |
| Case 106 | 15 | 92,654,719 | 92,669,785 | 2 | 2 | 4 | 0 |
| Case 106 | 15 | 92,671,919 | 93,050,966 | 2 | 1 | 3 | 0 |
| Case 106 | 15 | 93,051,659 | 93,108,185 | 2 | 2 | 4 | 0 |
| Case 106 | 15 | 93,111,516 | 93,307,668 | 2 | 1 | 3 | 0 |
| Case 106 | 15 | 93,310,575 | 93,467,354 | 2 | 2 | 4 | 0 |
| Case 106 | 15 | 93,472,980 | 93,877,949 | 2 | 1 | 3 | 0 |
| Case 106 | 15 | 93,881,534 | 93,963,897 | 2 | 2 | 4 | 0 |
| Case 106 | 15 | 93,964,877 | 93,988,156 | 2 | 1 | 3 | 0 |
| Case 106 | 15 | 93,989,259 | 94,213,821 | 2 | 2 | 4 | 0 |
| Case 106 | 15 | 94,215,287 | 94,266,567 | 2 | 1 | 3 | 0 |
| Case 106 | 15 | 94,283,318 | 94,748,728 | 2 | 2 | 4 | 0 |
| Case 106 | 15 | 94,755,158 | 94,848,183 | 2 | 1 | 3 | 0 |
| Case 106 | 15 | 94,850,304 | 94,908,904 | 2 | 2 | 4 | 0 |
| Case 106 | 15 | 94,910,368 | 94,959,409 | 2 | 1 | 3 | 0 |
| Case 106 | 15 | 94,960,355 | 95,184,578 | 2 | 2 | 4 | 0 |
| Case 106 | 15 | 95,185,871 | 95,212,426 | 2 | 1 | 3 | 0 |
| Case 106 | 15 | 95,217,028 | 95,244,477 | 2 | 2 | 4 | 0 |

|          |    |             |             |   |   |   |   |
|----------|----|-------------|-------------|---|---|---|---|
| Case 106 | 15 | 95,245,229  | 95,314,018  | 2 | 1 | 3 | 0 |
| Case 106 | 15 | 95,314,455  | 95,511,932  | 2 | 2 | 4 | 0 |
| Case 106 | 15 | 95,513,696  | 95,863,364  | 2 | 1 | 3 | 0 |
| Case 106 | 15 | 95,870,977  | 95,921,191  | 2 | 2 | 4 | 0 |
| Case 106 | 15 | 95,924,835  | 96,038,806  | 2 | 1 | 3 | 0 |
| Case 106 | 15 | 96,039,132  | 96,106,002  | 2 | 2 | 4 | 0 |
| Case 106 | 15 | 96,108,853  | 96,186,627  | 2 | 1 | 3 | 0 |
| Case 106 | 15 | 96,187,805  | 96,335,077  | 2 | 2 | 4 | 0 |
| Case 106 | 15 | 96,341,849  | 96,449,449  | 2 | 1 | 3 | 0 |
| Case 106 | 15 | 96,450,805  | 96,637,443  | 2 | 2 | 4 | 0 |
| Case 106 | 15 | 96,639,263  | 96,729,928  | 2 | 1 | 3 | 0 |
| Case 106 | 15 | 96,731,890  | 97,686,430  | 2 | 2 | 4 | 0 |
| Case 106 | 15 | 97,689,727  | 97,998,761  | 2 | 1 | 3 | 0 |
| Case 106 | 15 | 98,006,502  | 98,161,778  | 2 | 2 | 4 | 0 |
| Case 106 | 15 | 98,162,379  | 98,251,044  | 2 | 1 | 3 | 0 |
| Case 106 | 15 | 98,252,432  | 98,522,038  | 2 | 2 | 4 | 0 |
| Case 106 | 15 | 98,539,489  | 98,680,170  | 2 | 1 | 3 | 0 |
| Case 106 | 15 | 98,681,332  | 98,914,552  | 2 | 2 | 4 | 0 |
| Case 106 | 15 | 98,915,284  | 99,024,173  | 2 | 1 | 3 | 0 |
| Case 106 | 15 | 99,028,246  | 99,082,004  | 2 | 2 | 4 | 0 |
| Case 106 | 15 | 99,084,760  | 99,263,274  | 2 | 1 | 3 | 0 |
| Case 106 | 15 | 99,263,801  | 99,409,548  | 2 | 2 | 4 | 0 |
| Case 106 | 15 | 99,412,562  | 99,577,797  | 2 | 1 | 3 | 0 |
| Case 106 | 15 | 99,579,537  | 99,608,131  | 2 | 2 | 4 | 0 |
| Case 106 | 15 | 99,608,744  | 100,309,611 | 2 | 1 | 3 | 0 |
| Case 106 | 15 | 100,318,844 | 100,514,614 | 2 | 2 | 4 | 0 |
| Case 106 | 15 | 100,514,620 | 100,943,045 | 2 | 1 | 3 | 0 |
| Case 106 | 15 | 100,947,798 | 101,147,726 | 2 | 2 | 4 | 0 |
| Case 106 | 15 | 101,156,623 | 101,251,946 | 2 | 1 | 3 | 0 |
| Case 106 | 15 | 101,253,557 | 101,434,992 | 2 | 2 | 4 | 0 |
| Case 106 | 15 | 101,436,307 | 101,653,897 | 2 | 1 | 3 | 0 |
| Case 106 | 15 | 101,656,088 | 101,706,714 | 2 | 2 | 4 | 0 |
| Case 106 | 15 | 101,708,340 | 101,872,306 | 2 | 1 | 3 | 0 |
| Case 106 | 15 | 101,874,763 | 101,920,286 | 2 | 2 | 4 | 0 |
| Case 106 | 15 | 101,920,498 | 101,972,931 | 2 | 1 | 3 | 0 |
| Case 106 | 15 | 101,973,493 | 102,043,101 | 2 | 2 | 4 | 0 |
| Case 106 | 15 | 102,045,402 | 102,114,106 | 2 | 1 | 3 | 0 |
| Case 106 | 15 | 102,114,414 | 102,160,040 | 2 | 2 | 4 | 0 |
| Case 106 | 15 | 102,165,387 | 102,359,268 | 2 | 1 | 3 | 0 |
| Case 106 | 15 | 102,359,307 | 102,461,162 | 2 | 2 | 4 | 0 |
| Case 106 | 16 | 88,165      | 35,285,582  | 1 | 1 | 2 | 0 |
| Case 106 | 16 | 46,450,037  | 64,366,496  | 1 | 1 | 2 | 0 |
| Case 106 | 16 | 64,380,837  | 64,395,652  | 1 | 0 | 1 | 0 |
| Case 106 | 16 | 64,397,522  | 67,598,274  | 1 | 1 | 2 | 0 |
| Case 106 | 16 | 67,607,987  | 67,685,730  | 1 | 0 | 1 | 0 |
| Case 106 | 16 | 67,685,832  | 67,691,750  | 2 | 0 | 2 | 1 |
| Case 106 | 16 | 67,691,752  | 67,709,582  | 1 | 0 | 1 | 0 |
| Case 106 | 16 | 67,709,821  | 68,566,787  | 1 | 1 | 2 | 0 |
| Case 106 | 16 | 68,573,287  | 70,170,186  | 1 | 0 | 1 | 0 |
| Case 106 | 16 | 70,187,372  | 70,284,990  | 2 | 0 | 2 | 1 |
| Case 106 | 16 | 70,285,799  | 70,841,632  | 1 | 0 | 1 | 0 |
| Case 106 | 16 | 70,841,656  | 71,196,543  | 2 | 0 | 2 | 1 |
| Case 106 | 16 | 71,206,836  | 71,562,894  | 1 | 0 | 1 | 0 |
| Case 106 | 16 | 71,565,292  | 71,571,220  | 2 | 0 | 2 | 1 |
| Case 106 | 16 | 71,571,446  | 72,033,810  | 1 | 0 | 1 | 0 |
| Case 106 | 16 | 72,035,359  | 72,114,002  | 2 | 0 | 2 | 1 |
| Case 106 | 16 | 72,117,751  | 72,822,156  | 1 | 0 | 1 | 0 |
| Case 106 | 16 | 72,822,351  | 72,831,026  | 2 | 0 | 2 | 1 |
| Case 106 | 16 | 72,831,111  | 73,263,508  | 1 | 0 | 1 | 0 |
| Case 106 | 16 | 73,272,944  | 73,393,833  | 2 | 0 | 2 | 1 |
| Case 106 | 16 | 73,394,615  | 73,422,400  | 1 | 0 | 1 | 0 |

|          |    |            |            |   |   |   |   |
|----------|----|------------|------------|---|---|---|---|
| Case 106 | 16 | 73,425,772 | 73,445,035 | 2 | 0 | 2 | 1 |
| Case 106 | 16 | 73,445,209 | 78,455,478 | 1 | 0 | 1 | 0 |
| Case 106 | 16 | 78,458,513 | 78,496,876 | 2 | 0 | 2 | 1 |
| Case 106 | 16 | 78,497,817 | 78,729,624 | 1 | 0 | 1 | 0 |
| Case 106 | 16 | 78,731,449 | 78,867,839 | 0 | 0 | 0 | 0 |
| Case 106 | 16 | 78,869,317 | 78,870,954 | 2 | 0 | 2 | 1 |
| Case 106 | 16 | 78,871,429 | 78,972,995 | 1 | 0 | 1 | 0 |
| Case 106 | 16 | 78,975,007 | 79,053,610 | 2 | 0 | 2 | 1 |
| Case 106 | 16 | 79,053,912 | 79,520,553 | 1 | 0 | 1 | 0 |
| Case 106 | 16 | 79,522,673 | 79,567,790 | 2 | 0 | 2 | 1 |
| Case 106 | 16 | 79,569,810 | 79,605,583 | 1 | 0 | 1 | 0 |
| Case 106 | 16 | 79,606,877 | 79,710,481 | 2 | 0 | 2 | 1 |
| Case 106 | 16 | 79,722,425 | 80,145,980 | 1 | 0 | 1 | 0 |
| Case 106 | 16 | 80,146,783 | 80,163,600 | 2 | 0 | 2 | 1 |
| Case 106 | 16 | 80,163,809 | 80,283,100 | 1 | 0 | 1 | 0 |
| Case 106 | 16 | 80,285,884 | 80,341,115 | 2 | 0 | 2 | 1 |
| Case 106 | 16 | 80,347,251 | 80,716,457 | 1 | 0 | 1 | 0 |
| Case 106 | 16 | 80,718,468 | 80,719,189 | 2 | 0 | 2 | 1 |
| Case 106 | 16 | 80,725,445 | 81,190,601 | 1 | 0 | 1 | 0 |
| Case 106 | 16 | 81,190,613 | 81,194,437 | 2 | 0 | 2 | 1 |
| Case 106 | 16 | 81,194,912 | 81,249,850 | 1 | 0 | 1 | 0 |
| Case 106 | 16 | 81,249,871 | 81,298,282 | 2 | 0 | 2 | 1 |
| Case 106 | 16 | 81,298,301 | 81,413,699 | 1 | 0 | 1 | 0 |
| Case 106 | 16 | 81,421,075 | 81,444,502 | 2 | 0 | 2 | 1 |
| Case 106 | 16 | 81,444,857 | 81,509,279 | 1 | 0 | 1 | 0 |
| Case 106 | 16 | 81,509,722 | 81,549,127 | 2 | 0 | 2 | 1 |
| Case 106 | 16 | 81,549,708 | 81,555,922 | 1 | 0 | 1 | 0 |
| Case 106 | 16 | 81,560,996 | 81,892,913 | 2 | 0 | 2 | 1 |
| Case 106 | 16 | 81,894,745 | 81,937,556 | 1 | 0 | 1 | 0 |
| Case 106 | 16 | 81,937,714 | 81,982,624 | 2 | 0 | 2 | 1 |
| Case 106 | 16 | 81,982,779 | 82,004,832 | 1 | 0 | 1 | 0 |
| Case 106 | 16 | 82,021,546 | 82,138,454 | 2 | 0 | 2 | 1 |
| Case 106 | 16 | 82,140,561 | 82,188,657 | 1 | 0 | 1 | 0 |
| Case 106 | 16 | 82,194,190 | 82,678,897 | 2 | 0 | 2 | 1 |
| Case 106 | 16 | 82,679,478 | 82,994,130 | 1 | 0 | 1 | 0 |
| Case 106 | 16 | 82,995,097 | 83,020,528 | 2 | 0 | 2 | 1 |
| Case 106 | 16 | 83,032,826 | 83,188,272 | 1 | 0 | 1 | 0 |
| Case 106 | 16 | 83,188,957 | 83,226,327 | 2 | 0 | 2 | 1 |
| Case 106 | 16 | 83,226,661 | 83,572,424 | 1 | 0 | 1 | 0 |
| Case 106 | 16 | 83,577,108 | 83,628,580 | 2 | 0 | 2 | 1 |
| Case 106 | 16 | 83,629,403 | 83,687,469 | 1 | 0 | 1 | 0 |
| Case 106 | 16 | 83,687,645 | 83,744,592 | 2 | 0 | 2 | 1 |
| Case 106 | 16 | 83,744,723 | 83,813,806 | 1 | 0 | 1 | 0 |
| Case 106 | 16 | 83,814,858 | 83,926,906 | 2 | 0 | 2 | 1 |
| Case 106 | 16 | 83,927,239 | 84,035,531 | 1 | 0 | 1 | 0 |
| Case 106 | 16 | 84,036,227 | 84,048,540 | 2 | 0 | 2 | 1 |
| Case 106 | 16 | 84,050,247 | 84,117,219 | 1 | 0 | 1 | 0 |
| Case 106 | 16 | 84,118,667 | 84,133,440 | 2 | 0 | 2 | 1 |
| Case 106 | 16 | 84,135,228 | 84,203,939 | 1 | 0 | 1 | 0 |
| Case 106 | 16 | 84,205,904 | 84,211,969 | 2 | 0 | 2 | 1 |
| Case 106 | 16 | 84,212,597 | 84,256,422 | 1 | 0 | 1 | 0 |
| Case 106 | 16 | 84,256,544 | 84,270,381 | 2 | 0 | 2 | 1 |
| Case 106 | 16 | 84,270,386 | 84,308,076 | 1 | 0 | 1 | 0 |
| Case 106 | 16 | 84,311,563 | 90,274,695 | 1 | 1 | 2 | 0 |
| Case 106 | 17 | 11,885     | 109,329    | 1 | 0 | 1 | 0 |
| Case 106 | 17 | 109,700    | 119,382    | 2 | 0 | 2 | 1 |
| Case 106 | 17 | 120,174    | 823,823    | 1 | 0 | 1 | 0 |
| Case 106 | 17 | 827,031    | 904,983    | 2 | 0 | 2 | 1 |
| Case 106 | 17 | 905,695    | 1,393,486  | 1 | 0 | 1 | 0 |
| Case 106 | 17 | 1,397,737  | 1,477,619  | 2 | 0 | 2 | 1 |
| Case 106 | 17 | 1,478,460  | 1,494,634  | 1 | 0 | 1 | 0 |

|          |    |            |            |   |   |   |   |
|----------|----|------------|------------|---|---|---|---|
| Case 106 | 17 | 1,495,834  | 1,748,028  | 2 | 0 | 2 | 1 |
| Case 106 | 17 | 1,756,351  | 3,620,138  | 3 | 0 | 3 | 1 |
| Case 106 | 17 | 3,626,989  | 15,039,528 | 2 | 0 | 2 | 1 |
| Case 106 | 17 | 15,044,804 | 15,058,236 | 0 | 0 | 0 | 0 |
| Case 106 | 17 | 15,058,991 | 21,528,062 | 2 | 0 | 2 | 1 |
| Case 106 | 17 | 21,539,613 | 22,242,355 | 2 | 1 | 3 | 0 |
| Case 106 | 17 | 25,268,142 | 50,274,170 | 2 | 1 | 3 | 0 |
| Case 106 | 17 | 50,289,447 | 78,932,566 | 2 | 0 | 2 | 1 |
| Case 106 | 17 | 78,935,270 | 78,955,974 | 3 | 0 | 3 | 1 |
| Case 106 | 17 | 78,964,503 | 81,060,040 | 2 | 0 | 2 | 1 |
| Case 106 | 18 | 87,505     | 15,375,878 | 2 | 0 | 2 | 1 |
| Case 106 | 18 | 18,520,354 | 46,551,310 | 2 | 0 | 2 | 1 |
| Case 106 | 18 | 46,553,265 | 47,083,106 | 1 | 0 | 1 | 0 |
| Case 106 | 18 | 47,086,932 | 47,095,487 | 2 | 0 | 2 | 1 |
| Case 106 | 18 | 47,095,862 | 47,362,880 | 1 | 0 | 1 | 0 |
| Case 106 | 18 | 47,363,125 | 47,651,537 | 2 | 0 | 2 | 1 |
| Case 106 | 18 | 47,658,365 | 47,795,629 | 1 | 0 | 1 | 0 |
| Case 106 | 18 | 47,796,089 | 47,833,405 | 2 | 0 | 2 | 1 |
| Case 106 | 18 | 47,837,090 | 48,075,258 | 1 | 0 | 1 | 0 |
| Case 106 | 18 | 48,076,214 | 48,201,463 | 2 | 0 | 2 | 1 |
| Case 106 | 18 | 48,203,725 | 54,693,531 | 1 | 0 | 1 | 0 |
| Case 106 | 18 | 54,694,151 | 55,021,725 | 2 | 0 | 2 | 1 |
| Case 106 | 18 | 55,024,321 | 55,838,958 | 1 | 0 | 1 | 0 |
| Case 106 | 18 | 55,839,162 | 55,935,987 | 2 | 0 | 2 | 1 |
| Case 106 | 18 | 55,936,104 | 56,147,042 | 1 | 0 | 1 | 0 |
| Case 106 | 18 | 56,148,796 | 56,297,220 | 2 | 0 | 2 | 1 |
| Case 106 | 18 | 56,301,610 | 60,668,270 | 1 | 0 | 1 | 0 |
| Case 106 | 18 | 60,668,346 | 60,689,573 | 2 | 0 | 2 | 1 |
| Case 106 | 18 | 60,690,246 | 60,794,680 | 1 | 0 | 1 | 0 |
| Case 106 | 18 | 60,795,178 | 60,936,047 | 2 | 0 | 2 | 1 |
| Case 106 | 18 | 60,941,958 | 66,279,829 | 1 | 0 | 1 | 0 |
| Case 106 | 18 | 66,290,703 | 78,015,180 | 2 | 0 | 2 | 1 |
| Case 106 | 19 | 260,912    | 2,888,242  | 2 | 1 | 3 | 0 |
| Case 106 | 19 | 2,892,015  | 2,936,648  | 1 | 1 | 2 | 0 |
| Case 106 | 19 | 2,936,660  | 4,288,333  | 2 | 1 | 3 | 0 |
| Case 106 | 19 | 4,290,591  | 4,325,327  | 1 | 1 | 2 | 0 |
| Case 106 | 19 | 4,325,419  | 6,649,632  | 2 | 1 | 3 | 0 |
| Case 106 | 19 | 6,658,613  | 11,682,495 | 1 | 1 | 2 | 0 |
| Case 106 | 19 | 11,685,943 | 11,917,123 | 2 | 0 | 2 | 1 |
| Case 106 | 19 | 11,917,124 | 11,917,922 | 1 | 0 | 1 | 0 |
| Case 106 | 19 | 11,918,051 | 17,361,203 | 1 | 1 | 2 | 0 |
| Case 106 | 19 | 17,361,222 | 17,369,127 | 1 | 0 | 1 | 0 |
| Case 106 | 19 | 17,370,084 | 20,497,400 | 1 | 1 | 2 | 0 |
| Case 106 | 19 | 20,499,493 | 20,500,515 | 2 | 0 | 2 | 1 |
| Case 106 | 19 | 20,626,179 | 20,727,516 | 0 | 0 | 0 | 0 |
| Case 106 | 19 | 20,728,636 | 20,728,636 | 2 | 0 | 2 | 1 |
| Case 106 | 19 | 20,728,777 | 21,835,313 | 1 | 1 | 2 | 0 |
| Case 106 | 19 | 21,837,430 | 22,102,503 | 2 | 0 | 2 | 1 |
| Case 106 | 19 | 22,106,951 | 22,369,824 | 1 | 1 | 2 | 0 |
| Case 106 | 19 | 22,377,109 | 22,703,220 | 2 | 0 | 2 | 1 |
| Case 106 | 19 | 22,707,258 | 24,490,299 | 1 | 1 | 2 | 0 |
| Case 106 | 19 | 24,518,609 | 24,629,285 | 1 | 0 | 1 | 0 |
| Case 106 | 19 | 27,732,159 | 27,960,006 | 1 | 0 | 1 | 0 |
| Case 106 | 19 | 27,978,445 | 59,097,160 | 1 | 1 | 2 | 0 |
| Case 106 | 20 | 63,244     | 14,732,585 | 2 | 1 | 3 | 0 |
| Case 106 | 20 | 14,739,839 | 14,771,194 | 1 | 0 | 1 | 0 |
| Case 106 | 20 | 14,772,789 | 15,110,701 | 0 | 0 | 0 | 0 |
| Case 106 | 20 | 15,111,138 | 15,122,254 | 2 | 0 | 2 | 1 |
| Case 106 | 20 | 15,127,194 | 26,293,985 | 2 | 1 | 3 | 0 |
| Case 106 | 20 | 29,425,357 | 62,190,345 | 2 | 1 | 3 | 0 |
| Case 106 | 20 | 62,190,628 | 62,191,849 | 1 | 1 | 2 | 0 |

|          |    |            |            |   |   |   |   |
|----------|----|------------|------------|---|---|---|---|
| Case 106 | 20 | 62,191,937 | 62,948,788 | 2 | 1 | 3 | 0 |
| Case 106 | 21 | 10,827,533 | 10,971,337 | 1 | 1 | 2 | 0 |
| Case 106 | 21 | 14,368,320 | 17,768,524 | 1 | 1 | 2 | 0 |
| Case 106 | 21 | 17,772,222 | 17,775,303 | 1 | 0 | 1 | 0 |
| Case 106 | 21 | 17,777,827 | 31,340,248 | 1 | 1 | 2 | 0 |
| Case 106 | 21 | 31,350,669 | 34,486,690 | 1 | 0 | 1 | 0 |
| Case 106 | 21 | 34,493,297 | 36,816,352 | 1 | 1 | 2 | 0 |
| Case 106 | 21 | 36,819,003 | 37,075,862 | 2 | 0 | 2 | 1 |
| Case 106 | 21 | 37,078,017 | 37,940,863 | 1 | 0 | 1 | 0 |
| Case 106 | 21 | 37,941,317 | 38,015,220 | 2 | 0 | 2 | 1 |
| Case 106 | 21 | 38,017,529 | 38,032,496 | 1 | 0 | 1 | 0 |
| Case 106 | 21 | 38,032,750 | 38,202,786 | 2 | 0 | 2 | 1 |
| Case 106 | 21 | 38,209,770 | 39,176,328 | 1 | 1 | 2 | 0 |
| Case 106 | 21 | 39,180,799 | 39,341,560 | 2 | 0 | 2 | 1 |
| Case 106 | 21 | 39,345,240 | 39,345,657 | 0 | 0 | 0 | 0 |
| Case 106 | 21 | 39,346,333 | 39,814,374 | 2 | 0 | 2 | 1 |
| Case 106 | 21 | 39,815,212 | 39,841,399 | 1 | 0 | 1 | 0 |
| Case 106 | 21 | 39,843,392 | 40,194,216 | 2 | 0 | 2 | 1 |
| Case 106 | 21 | 40,194,787 | 40,262,435 | 1 | 0 | 1 | 0 |
| Case 106 | 21 | 40,265,938 | 40,352,461 | 2 | 0 | 2 | 1 |
| Case 106 | 21 | 40,354,444 | 40,380,249 | 1 | 0 | 1 | 0 |
| Case 106 | 21 | 40,380,383 | 40,395,343 | 2 | 0 | 2 | 1 |
| Case 106 | 21 | 40,396,113 | 40,449,658 | 1 | 0 | 1 | 0 |
| Case 106 | 21 | 40,451,794 | 40,492,274 | 2 | 0 | 2 | 1 |
| Case 106 | 21 | 40,492,859 | 40,899,071 | 1 | 0 | 1 | 0 |
| Case 106 | 21 | 40,900,348 | 41,330,402 | 2 | 0 | 2 | 1 |
| Case 106 | 21 | 41,333,747 | 41,360,591 | 1 | 0 | 1 | 0 |
| Case 106 | 21 | 41,361,357 | 41,492,475 | 2 | 0 | 2 | 1 |
| Case 106 | 21 | 41,494,633 | 42,124,011 | 1 | 0 | 1 | 0 |
| Case 106 | 21 | 42,126,689 | 42,224,120 | 2 | 0 | 2 | 1 |
| Case 106 | 21 | 42,230,435 | 42,421,994 | 1 | 0 | 1 | 0 |
| Case 106 | 21 | 42,426,742 | 42,521,711 | 2 | 0 | 2 | 1 |
| Case 106 | 21 | 42,523,852 | 42,558,694 | 1 | 0 | 1 | 0 |
| Case 106 | 21 | 42,561,034 | 42,655,515 | 2 | 0 | 2 | 1 |
| Case 106 | 21 | 42,657,187 | 42,731,511 | 1 | 0 | 1 | 0 |
| Case 106 | 21 | 42,734,987 | 43,356,277 | 2 | 0 | 2 | 1 |
| Case 106 | 21 | 43,358,071 | 43,373,522 | 1 | 0 | 1 | 0 |
| Case 106 | 21 | 43,376,453 | 44,198,143 | 2 | 0 | 2 | 1 |
| Case 106 | 21 | 44,200,858 | 44,275,829 | 1 | 0 | 1 | 0 |
| Case 106 | 21 | 44,275,979 | 44,317,309 | 2 | 0 | 2 | 1 |
| Case 106 | 21 | 44,318,769 | 44,574,196 | 1 | 0 | 1 | 0 |
| Case 106 | 21 | 44,574,541 | 44,833,854 | 2 | 0 | 2 | 1 |
| Case 106 | 21 | 44,835,301 | 44,871,189 | 1 | 0 | 1 | 0 |
| Case 106 | 21 | 44,871,682 | 44,897,977 | 2 | 0 | 2 | 1 |
| Case 106 | 21 | 44,903,553 | 45,110,316 | 1 | 0 | 1 | 0 |
| Case 106 | 21 | 45,110,784 | 45,237,039 | 2 | 0 | 2 | 1 |
| Case 106 | 21 | 45,239,078 | 45,356,073 | 1 | 0 | 1 | 0 |
| Case 106 | 21 | 45,356,487 | 45,502,929 | 2 | 0 | 2 | 1 |
| Case 106 | 21 | 45,503,121 | 45,649,954 | 1 | 0 | 1 | 0 |
| Case 106 | 21 | 45,649,969 | 45,687,581 | 2 | 0 | 2 | 1 |
| Case 106 | 21 | 45,696,025 | 47,717,493 | 1 | 1 | 2 | 0 |
| Case 106 | 21 | 47,717,537 | 48,100,155 | 2 | 1 | 3 | 0 |
| Case 106 | 22 | 16,114,244 | 17,012,935 | 1 | 0 | 1 | 0 |
| Case 106 | 22 | 17,026,095 | 18,650,803 | 1 | 1 | 2 | 0 |
| Case 106 | 22 | 18,807,228 | 21,025,732 | 2 | 1 | 3 | 0 |
| Case 106 | 22 | 21,062,168 | 23,443,909 | 1 | 1 | 2 | 0 |
| Case 106 | 22 | 23,444,796 | 25,658,525 | 2 | 1 | 3 | 0 |
| Case 106 | 22 | 25,661,725 | 32,357,360 | 1 | 1 | 2 | 0 |
| Case 106 | 22 | 32,358,588 | 32,665,789 | 2 | 0 | 2 | 1 |
| Case 106 | 22 | 32,666,087 | 34,186,914 | 1 | 1 | 2 | 0 |
| Case 106 | 22 | 34,194,745 | 34,271,782 | 1 | 0 | 1 | 0 |

|          |    |             |             |   |   |   |   |
|----------|----|-------------|-------------|---|---|---|---|
| Case 106 | 22 | 34,273,307  | 36,966,242  | 1 | 1 | 2 | 0 |
| Case 106 | 22 | 36,969,683  | 41,790,179  | 2 | 1 | 3 | 0 |
| Case 106 | 22 | 41,791,536  | 41,994,455  | 1 | 1 | 2 | 0 |
| Case 106 | 22 | 41,995,335  | 49,304,823  | 2 | 1 | 3 | 0 |
| Case 106 | 22 | 49,305,099  | 50,118,723  | 3 | 1 | 4 | 0 |
| Case 106 | 22 | 50,119,885  | 50,120,350  | 2 | 0 | 2 | 1 |
| Case 106 | 22 | 50,124,094  | 50,436,143  | 2 | 1 | 3 | 0 |
| Case 106 | 22 | 50,436,488  | 50,642,777  | 3 | 1 | 4 | 0 |
| Case 106 | 22 | 50,644,658  | 50,644,658  | 2 | 0 | 2 | 1 |
| Case 106 | 22 | 50,644,783  | 50,728,919  | 2 | 1 | 3 | 0 |
| Case 106 | 22 | 50,747,598  | 50,969,367  | 3 | 1 | 4 | 0 |
| Case 106 | 22 | 50,969,637  | 50,969,637  | 2 | 0 | 2 | 1 |
| Case 106 | 22 | 50,969,647  | 51,123,505  | 2 | 1 | 3 | 0 |
| Case 106 | 22 | 51,133,580  | 51,195,728  | 2 | 0 | 2 | 1 |
| Case 107 | 1  | 82,154      | 1,601,104   | 2 | 1 | 3 | 0 |
| Case 107 | 1  | 1,601,170   | 2,333,031   | 1 | 1 | 2 | 0 |
| Case 107 | 1  | 2,336,210   | 3,680,345   | 2 | 1 | 3 | 0 |
| Case 107 | 1  | 3,680,362   | 5,765,353   | 1 | 1 | 2 | 0 |
| Case 107 | 1  | 5,767,805   | 6,634,973   | 2 | 1 | 3 | 0 |
| Case 107 | 1  | 6,635,231   | 7,412,051   | 1 | 1 | 2 | 0 |
| Case 107 | 1  | 7,412,088   | 7,737,755   | 2 | 1 | 3 | 0 |
| Case 107 | 1  | 7,748,525   | 9,164,133   | 1 | 1 | 2 | 0 |
| Case 107 | 1  | 9,164,366   | 9,790,660   | 2 | 1 | 3 | 0 |
| Case 107 | 1  | 9,790,703   | 10,683,683  | 1 | 1 | 2 | 0 |
| Case 107 | 1  | 10,687,345  | 11,009,844  | 2 | 1 | 3 | 0 |
| Case 107 | 1  | 11,011,002  | 16,044,401  | 1 | 1 | 2 | 0 |
| Case 107 | 1  | 16,053,627  | 16,110,815  | 2 | 1 | 3 | 0 |
| Case 107 | 1  | 16,112,795  | 22,088,379  | 1 | 1 | 2 | 0 |
| Case 107 | 1  | 22,104,971  | 22,688,484  | 2 | 1 | 3 | 0 |
| Case 107 | 1  | 22,690,923  | 32,004,898  | 1 | 1 | 2 | 0 |
| Case 107 | 1  | 32,007,672  | 32,285,400  | 2 | 1 | 3 | 0 |
| Case 107 | 1  | 32,290,078  | 53,532,609  | 1 | 1 | 2 | 0 |
| Case 107 | 1  | 53,534,248  | 53,579,109  | 2 | 1 | 3 | 0 |
| Case 107 | 1  | 53,579,182  | 71,060,083  | 1 | 1 | 2 | 0 |
| Case 107 | 1  | 71,067,296  | 71,245,703  | 2 | 0 | 2 | 1 |
| Case 107 | 1  | 71,250,352  | 115,489,865 | 1 | 1 | 2 | 0 |
| Case 107 | 1  | 115,489,879 | 116,260,604 | 2 | 1 | 3 | 0 |
| Case 107 | 1  | 116,268,699 | 121,346,616 | 1 | 1 | 2 | 0 |
| Case 107 | 1  | 142,649,718 | 152,548,480 | 1 | 1 | 2 | 0 |
| Case 107 | 1  | 152,549,876 | 153,407,572 | 2 | 1 | 3 | 0 |
| Case 107 | 1  | 153,408,831 | 156,761,543 | 1 | 1 | 2 | 0 |
| Case 107 | 1  | 156,765,973 | 157,347,856 | 2 | 1 | 3 | 0 |
| Case 107 | 1  | 157,348,712 | 201,181,070 | 1 | 1 | 2 | 0 |
| Case 107 | 1  | 201,181,217 | 201,732,694 | 2 | 1 | 3 | 0 |
| Case 107 | 1  | 201,733,944 | 226,752,447 | 1 | 1 | 2 | 0 |
| Case 107 | 1  | 226,755,701 | 226,924,982 | 2 | 1 | 3 | 0 |
| Case 107 | 1  | 226,928,864 | 227,880,275 | 1 | 1 | 2 | 0 |
| Case 107 | 1  | 227,885,726 | 228,874,049 | 2 | 1 | 3 | 0 |
| Case 107 | 1  | 228,878,522 | 249,218,992 | 1 | 1 | 2 | 0 |
| Case 107 | 2  | 18,674      | 7,693,796   | 1 | 1 | 2 | 0 |
| Case 107 | 2  | 7,700,390   | 8,423,057   | 2 | 1 | 3 | 0 |
| Case 107 | 2  | 8,424,313   | 15,293,757  | 1 | 1 | 2 | 0 |
| Case 107 | 2  | 15,294,683  | 15,769,725  | 2 | 0 | 2 | 1 |
| Case 107 | 2  | 15,770,913  | 15,999,597  | 2 | 1 | 3 | 0 |
| Case 107 | 2  | 16,004,423  | 20,205,541  | 1 | 1 | 2 | 0 |
| Case 107 | 2  | 20,205,612  | 20,891,799  | 2 | 1 | 3 | 0 |
| Case 107 | 2  | 20,892,006  | 29,196,785  | 1 | 1 | 2 | 0 |
| Case 107 | 2  | 29,202,386  | 29,240,783  | 2 | 1 | 3 | 0 |
| Case 107 | 2  | 29,245,036  | 33,498,802  | 1 | 1 | 2 | 0 |
| Case 107 | 2  | 33,499,107  | 33,836,922  | 2 | 0 | 2 | 1 |
| Case 107 | 2  | 33,845,642  | 35,717,726  | 1 | 1 | 2 | 0 |

|          |   |             |             |   |   |   |   |
|----------|---|-------------|-------------|---|---|---|---|
| Case 107 | 2 | 35,719,814  | 36,401,650  | 2 | 1 | 3 | 0 |
| Case 107 | 2 | 36,408,593  | 41,540,474  | 1 | 1 | 2 | 0 |
| Case 107 | 2 | 41,540,966  | 42,047,856  | 2 | 1 | 3 | 0 |
| Case 107 | 2 | 42,049,084  | 43,991,488  | 1 | 1 | 2 | 0 |
| Case 107 | 2 | 43,995,001  | 44,357,936  | 2 | 0 | 2 | 1 |
| Case 107 | 2 | 44,358,504  | 46,322,951  | 1 | 1 | 2 | 0 |
| Case 107 | 2 | 46,324,866  | 46,558,541  | 2 | 1 | 3 | 0 |
| Case 107 | 2 | 46,565,091  | 47,073,871  | 1 | 1 | 2 | 0 |
| Case 107 | 2 | 47,075,393  | 47,284,168  | 2 | 1 | 3 | 0 |
| Case 107 | 2 | 47,284,506  | 52,126,166  | 1 | 1 | 2 | 0 |
| Case 107 | 2 | 52,128,985  | 53,854,488  | 2 | 1 | 3 | 0 |
| Case 107 | 2 | 53,856,928  | 55,124,412  | 1 | 1 | 2 | 0 |
| Case 107 | 2 | 55,125,123  | 55,900,032  | 1 | 0 | 1 | 0 |
| Case 107 | 2 | 55,901,317  | 61,147,243  | 1 | 1 | 2 | 0 |
| Case 107 | 2 | 61,148,973  | 61,864,069  | 1 | 0 | 1 | 0 |
| Case 107 | 2 | 61,874,015  | 66,021,675  | 1 | 1 | 2 | 0 |
| Case 107 | 2 | 66,024,928  | 67,301,846  | 2 | 1 | 3 | 0 |
| Case 107 | 2 | 67,302,169  | 71,160,261  | 1 | 1 | 2 | 0 |
| Case 107 | 2 | 71,160,305  | 71,655,733  | 2 | 0 | 2 | 1 |
| Case 107 | 2 | 71,658,541  | 72,405,665  | 2 | 1 | 3 | 0 |
| Case 107 | 2 | 72,405,833  | 75,115,133  | 1 | 1 | 2 | 0 |
| Case 107 | 2 | 75,115,687  | 75,630,833  | 2 | 1 | 3 | 0 |
| Case 107 | 2 | 75,630,998  | 75,882,399  | 2 | 0 | 2 | 1 |
| Case 107 | 2 | 75,882,855  | 79,581,175  | 1 | 1 | 2 | 0 |
| Case 107 | 2 | 79,586,600  | 79,934,288  | 2 | 0 | 2 | 1 |
| Case 107 | 2 | 79,934,864  | 80,175,291  | 2 | 1 | 3 | 0 |
| Case 107 | 2 | 80,175,510  | 92,081,640  | 1 | 1 | 2 | 0 |
| Case 107 | 2 | 95,429,424  | 95,868,247  | 1 | 1 | 2 | 0 |
| Case 107 | 2 | 95,897,767  | 96,809,681  | 2 | 1 | 3 | 0 |
| Case 107 | 2 | 96,813,480  | 105,970,650 | 1 | 1 | 2 | 0 |
| Case 107 | 2 | 105,974,978 | 106,606,105 | 2 | 1 | 3 | 0 |
| Case 107 | 2 | 106,610,454 | 113,820,476 | 1 | 1 | 2 | 0 |
| Case 107 | 2 | 113,820,530 | 113,950,696 | 2 | 1 | 3 | 0 |
| Case 107 | 2 | 113,950,887 | 118,989,721 | 1 | 1 | 2 | 0 |
| Case 107 | 2 | 118,995,267 | 120,007,357 | 2 | 1 | 3 | 0 |
| Case 107 | 2 | 120,008,556 | 124,926,513 | 1 | 1 | 2 | 0 |
| Case 107 | 2 | 124,928,508 | 141,274,576 | 2 | 0 | 2 | 1 |
| Case 107 | 2 | 141,279,101 | 142,248,347 | 1 | 1 | 2 | 0 |
| Case 107 | 2 | 142,249,777 | 197,183,897 | 2 | 0 | 2 | 1 |
| Case 107 | 2 | 197,184,026 | 198,436,794 | 1 | 0 | 1 | 0 |
| Case 107 | 2 | 198,436,886 | 201,355,058 | 1 | 1 | 2 | 0 |
| Case 107 | 2 | 201,355,098 | 202,699,201 | 1 | 0 | 1 | 0 |
| Case 107 | 2 | 202,700,365 | 202,969,687 | 1 | 1 | 2 | 0 |
| Case 107 | 2 | 202,974,099 | 204,634,767 | 1 | 0 | 1 | 0 |
| Case 107 | 2 | 204,639,764 | 204,661,197 | 2 | 0 | 2 | 1 |
| Case 107 | 2 | 204,676,173 | 204,694,805 | 1 | 1 | 2 | 0 |
| Case 107 | 2 | 204,711,588 | 209,028,127 | 2 | 0 | 2 | 1 |
| Case 107 | 2 | 209,028,152 | 212,627,259 | 1 | 1 | 2 | 0 |
| Case 107 | 2 | 212,627,805 | 220,166,368 | 2 | 0 | 2 | 1 |
| Case 107 | 2 | 220,166,408 | 220,712,076 | 1 | 1 | 2 | 0 |
| Case 107 | 2 | 220,714,502 | 221,016,706 | 2 | 1 | 3 | 0 |
| Case 107 | 2 | 221,019,458 | 221,063,851 | 2 | 0 | 2 | 1 |
| Case 107 | 2 | 221,067,691 | 222,995,369 | 1 | 1 | 2 | 0 |
| Case 107 | 2 | 222,997,104 | 224,746,756 | 2 | 0 | 2 | 1 |
| Case 107 | 2 | 224,754,537 | 238,999,883 | 1 | 1 | 2 | 0 |
| Case 107 | 2 | 239,002,506 | 239,066,379 | 2 | 1 | 3 | 0 |
| Case 107 | 2 | 239,071,623 | 241,188,859 | 1 | 1 | 2 | 0 |
| Case 107 | 2 | 241,193,279 | 241,876,580 | 2 | 1 | 3 | 0 |
| Case 107 | 2 | 241,879,702 | 242,689,605 | 2 | 0 | 2 | 1 |
| Case 107 | 2 | 242,690,675 | 243,048,760 | 2 | 1 | 3 | 0 |
| Case 107 | 3 | 61,495      | 7,510,891   | 2 | 0 | 2 | 1 |

|          |   |             |             |   |   |   |   |
|----------|---|-------------|-------------|---|---|---|---|
| Case 107 | 3 | 7,511,375   | 8,857,963   | 2 | 1 | 3 | 0 |
| Case 107 | 3 | 8,862,925   | 33,838,124  | 2 | 0 | 2 | 1 |
| Case 107 | 3 | 33,838,866  | 35,015,022  | 1 | 1 | 2 | 0 |
| Case 107 | 3 | 35,038,139  | 36,311,133  | 2 | 0 | 2 | 1 |
| Case 107 | 3 | 36,311,231  | 37,060,459  | 1 | 1 | 2 | 0 |
| Case 107 | 3 | 37,061,893  | 37,396,678  | 1 | 0 | 1 | 0 |
| Case 107 | 3 | 37,403,413  | 41,107,173  | 1 | 1 | 2 | 0 |
| Case 107 | 3 | 41,109,561  | 42,119,479  | 1 | 0 | 1 | 0 |
| Case 107 | 3 | 42,123,753  | 42,251,706  | 1 | 1 | 2 | 0 |
| Case 107 | 3 | 42,252,141  | 42,672,803  | 2 | 0 | 2 | 1 |
| Case 107 | 3 | 42,674,094  | 44,283,844  | 1 | 1 | 2 | 0 |
| Case 107 | 3 | 44,284,584  | 44,929,195  | 1 | 0 | 1 | 0 |
| Case 107 | 3 | 44,929,287  | 47,043,467  | 1 | 1 | 2 | 0 |
| Case 107 | 3 | 47,043,648  | 52,558,490  | 2 | 0 | 2 | 1 |
| Case 107 | 3 | 52,558,884  | 60,310,376  | 1 | 1 | 2 | 0 |
| Case 107 | 3 | 60,310,790  | 60,544,132  | 2 | 0 | 2 | 1 |
| Case 107 | 3 | 60,545,602  | 61,241,178  | 1 | 0 | 1 | 0 |
| Case 107 | 3 | 61,253,045  | 86,556,132  | 1 | 1 | 2 | 0 |
| Case 107 | 3 | 86,557,037  | 86,557,037  | 3 | 0 | 3 | 1 |
| Case 107 | 3 | 86,558,884  | 87,241,497  | 5 | 1 | 6 | 0 |
| Case 107 | 3 | 87,249,364  | 88,273,071  | 3 | 0 | 3 | 1 |
| Case 107 | 3 | 88,277,712  | 89,132,282  | 3 | 1 | 4 | 0 |
| Case 107 | 3 | 89,155,950  | 89,178,317  | 3 | 0 | 3 | 1 |
| Case 107 | 3 | 89,187,123  | 90,442,925  | 2 | 0 | 2 | 1 |
| Case 107 | 3 | 93,537,290  | 94,071,481  | 2 | 0 | 2 | 1 |
| Case 107 | 3 | 94,075,826  | 97,059,115  | 3 | 0 | 3 | 1 |
| Case 107 | 3 | 97,062,536  | 103,601,778 | 2 | 2 | 4 | 0 |
| Case 107 | 3 | 103,614,900 | 107,744,023 | 3 | 0 | 3 | 1 |
| Case 107 | 3 | 107,750,920 | 109,316,638 | 2 | 0 | 2 | 1 |
| Case 107 | 3 | 109,323,640 | 111,048,721 | 3 | 0 | 3 | 1 |
| Case 107 | 3 | 111,050,246 | 112,375,793 | 2 | 0 | 2 | 1 |
| Case 107 | 3 | 112,376,308 | 113,028,334 | 3 | 0 | 3 | 1 |
| Case 107 | 3 | 113,034,316 | 113,586,776 | 2 | 0 | 2 | 1 |
| Case 107 | 3 | 113,588,445 | 119,023,971 | 3 | 0 | 3 | 1 |
| Case 107 | 3 | 119,024,937 | 121,573,850 | 2 | 0 | 2 | 1 |
| Case 107 | 3 | 121,574,215 | 128,446,412 | 3 | 0 | 3 | 1 |
| Case 107 | 3 | 128,455,073 | 129,195,600 | 2 | 0 | 2 | 1 |
| Case 107 | 3 | 129,195,663 | 129,694,826 | 3 | 0 | 3 | 1 |
| Case 107 | 3 | 129,695,373 | 130,504,256 | 2 | 0 | 2 | 1 |
| Case 107 | 3 | 130,511,038 | 135,502,373 | 3 | 0 | 3 | 1 |
| Case 107 | 3 | 135,514,304 | 136,676,525 | 2 | 0 | 2 | 1 |
| Case 107 | 3 | 136,677,339 | 141,881,351 | 3 | 0 | 3 | 1 |
| Case 107 | 3 | 141,882,459 | 142,548,560 | 2 | 0 | 2 | 1 |
| Case 107 | 3 | 142,548,566 | 148,636,416 | 3 | 0 | 3 | 1 |
| Case 107 | 3 | 148,637,771 | 148,930,403 | 2 | 0 | 2 | 1 |
| Case 107 | 3 | 148,930,433 | 160,968,084 | 3 | 0 | 3 | 1 |
| Case 107 | 3 | 160,968,365 | 160,987,158 | 2 | 1 | 3 | 0 |
| Case 107 | 3 | 161,003,124 | 161,003,124 | 3 | 1 | 4 | 0 |
| Case 107 | 3 | 161,008,125 | 161,195,729 | 4 | 3 | 7 | 0 |
| Case 107 | 3 | 161,203,534 | 161,209,750 | 2 | 0 | 2 | 1 |
| Case 107 | 3 | 161,213,636 | 161,771,382 | 3 | 0 | 3 | 1 |
| Case 107 | 3 | 161,778,666 | 161,778,975 | 2 | 1 | 3 | 0 |
| Case 107 | 3 | 161,791,399 | 162,237,495 | 4 | 3 | 7 | 0 |
| Case 107 | 3 | 162,239,385 | 162,261,021 | 2 | 0 | 2 | 1 |
| Case 107 | 3 | 162,262,746 | 166,555,665 | 3 | 0 | 3 | 1 |
| Case 107 | 3 | 166,572,963 | 166,745,838 | 5 | 1 | 6 | 0 |
| Case 107 | 3 | 166,746,608 | 167,102,124 | 3 | 0 | 3 | 1 |
| Case 107 | 3 | 167,105,744 | 173,573,842 | 2 | 2 | 4 | 0 |
| Case 107 | 3 | 173,573,991 | 175,059,171 | 3 | 0 | 3 | 1 |
| Case 107 | 3 | 175,061,871 | 175,861,931 | 2 | 0 | 2 | 1 |
| Case 107 | 3 | 175,862,678 | 178,105,341 | 3 | 0 | 3 | 1 |



|          |   |             |             |   |   |   |   |
|----------|---|-------------|-------------|---|---|---|---|
| Case 107 | 3 | 178,107,949 | 179,579,536 | 2 | 2 | 4 | 0 |
| Case 107 | 3 | 179,592,147 | 180,706,866 | 2 | 0 | 2 | 1 |
| Case 107 | 3 | 180,709,308 | 181,938,870 | 3 | 0 | 3 | 1 |
| Case 107 | 3 | 181,941,060 | 182,390,083 | 2 | 0 | 2 | 1 |
| Case 107 | 3 | 182,392,033 | 183,469,906 | 2 | 1 | 3 | 0 |
| Case 107 | 3 | 183,469,912 | 183,755,887 | 3 | 1 | 4 | 0 |
| Case 107 | 3 | 183,755,948 | 183,755,948 | 5 | 1 | 6 | 0 |
| Case 107 | 3 | 183,756,056 | 183,756,058 | 3 | 0 | 3 | 1 |
| Case 107 | 3 | 183,756,062 | 186,427,340 | 5 | 1 | 6 | 0 |
| Case 107 | 3 | 186,428,061 | 188,976,010 | 6 | 1 | 7 | 0 |
| Case 107 | 3 | 189,000,601 | 189,005,992 | 3 | 0 | 3 | 1 |
| Case 107 | 3 | 189,010,687 | 191,761,351 | 3 | 1 | 4 | 0 |
| Case 107 | 3 | 191,765,223 | 193,557,558 | 2 | 1 | 3 | 0 |
| Case 107 | 3 | 193,561,684 | 193,766,273 | 3 | 1 | 4 | 0 |
| Case 107 | 3 | 193,769,266 | 195,677,895 | 3 | 0 | 3 | 1 |
| Case 107 | 3 | 195,734,915 | 196,668,359 | 2 | 0 | 2 | 1 |
| Case 107 | 3 | 196,669,912 | 197,838,262 | 2 | 1 | 3 | 0 |
| Case 107 | 4 | 71,566      | 493,156     | 1 | 0 | 1 | 0 |
| Case 107 | 4 | 494,188     | 497,138     | 1 | 1 | 2 | 0 |
| Case 107 | 4 | 498,459     | 860,205     | 2 | 0 | 2 | 1 |
| Case 107 | 4 | 860,238     | 985,310     | 2 | 1 | 3 | 0 |
| Case 107 | 4 | 985,418     | 7,084,858   | 2 | 0 | 2 | 1 |
| Case 107 | 4 | 7,084,985   | 8,390,998   | 2 | 1 | 3 | 0 |
| Case 107 | 4 | 8,390,999   | 38,984,852  | 2 | 0 | 2 | 1 |
| Case 107 | 4 | 38,988,587  | 40,196,549  | 1 | 0 | 1 | 0 |
| Case 107 | 4 | 40,198,369  | 40,199,551  | 1 | 1 | 2 | 0 |
| Case 107 | 4 | 40,205,742  | 49,620,898  | 2 | 0 | 2 | 1 |
| Case 107 | 4 | 52,697,856  | 144,945,108 | 2 | 0 | 2 | 1 |
| Case 107 | 4 | 144,949,348 | 144,950,193 | 3 | 0 | 3 | 1 |
| Case 107 | 4 | 144,965,891 | 145,035,868 | 7 | 0 | 7 | 1 |
| Case 107 | 4 | 145,040,841 | 178,146,619 | 2 | 0 | 2 | 1 |
| Case 107 | 4 | 178,151,435 | 180,179,576 | 3 | 0 | 3 | 1 |
| Case 107 | 4 | 180,182,483 | 181,920,483 | 2 | 0 | 2 | 1 |
| Case 107 | 4 | 181,923,958 | 190,963,766 | 1 | 0 | 1 | 0 |
| Case 107 | 5 | 38,139      | 1,686,960   | 3 | 0 | 3 | 1 |
| Case 107 | 5 | 1,687,735   | 15,719,350  | 2 | 0 | 2 | 1 |
| Case 107 | 5 | 15,719,942  | 16,572,152  | 3 | 0 | 3 | 1 |
| Case 107 | 5 | 16,572,153  | 46,399,093  | 2 | 0 | 2 | 1 |
| Case 107 | 5 | 49,457,282  | 50,821,162  | 2 | 0 | 2 | 1 |
| Case 107 | 5 | 50,828,866  | 53,333,477  | 3 | 0 | 3 | 1 |
| Case 107 | 5 | 53,336,820  | 55,528,815  | 2 | 0 | 2 | 1 |
| Case 107 | 5 | 55,548,797  | 55,965,167  | 3 | 0 | 3 | 1 |
| Case 107 | 5 | 55,966,023  | 56,595,262  | 2 | 0 | 2 | 1 |
| Case 107 | 5 | 56,603,577  | 58,049,332  | 3 | 0 | 3 | 1 |
| Case 107 | 5 | 58,049,391  | 78,640,296  | 2 | 0 | 2 | 1 |
| Case 107 | 5 | 78,641,327  | 78,668,550  | 3 | 0 | 3 | 1 |
| Case 107 | 5 | 78,670,802  | 79,215,861  | 0 | 0 | 0 | 0 |
| Case 107 | 5 | 79,216,901  | 79,230,312  | 3 | 0 | 3 | 1 |
| Case 107 | 5 | 79,233,056  | 100,578,856 | 2 | 0 | 2 | 1 |
| Case 107 | 5 | 100,580,114 | 101,117,655 | 3 | 0 | 3 | 1 |
| Case 107 | 5 | 101,118,483 | 113,550,042 | 2 | 0 | 2 | 1 |
| Case 107 | 5 | 113,552,328 | 116,375,473 | 3 | 0 | 3 | 1 |
| Case 107 | 5 | 116,376,690 | 122,402,675 | 2 | 0 | 2 | 1 |
| Case 107 | 5 | 122,405,090 | 125,694,196 | 3 | 0 | 3 | 1 |
| Case 107 | 5 | 125,696,118 | 128,123,652 | 2 | 0 | 2 | 1 |
| Case 107 | 5 | 128,129,794 | 132,180,990 | 3 | 0 | 3 | 1 |
| Case 107 | 5 | 132,181,800 | 167,984,721 | 2 | 0 | 2 | 1 |
| Case 107 | 5 | 167,987,499 | 168,854,538 | 3 | 0 | 3 | 1 |
| Case 107 | 5 | 168,868,506 | 169,358,418 | 2 | 0 | 2 | 1 |
| Case 107 | 5 | 169,359,522 | 172,324,978 | 3 | 0 | 3 | 1 |
| Case 107 | 5 | 172,331,057 | 176,734,647 | 2 | 0 | 2 | 1 |

|          |   |             |             |   |   |   |   |
|----------|---|-------------|-------------|---|---|---|---|
| Case 107 | 5 | 176,734,648 | 177,005,613 | 3 | 0 | 3 | 1 |
| Case 107 | 5 | 177,011,863 | 179,676,979 | 2 | 0 | 2 | 1 |
| Case 107 | 5 | 179,677,517 | 180,693,127 | 3 | 0 | 3 | 1 |
| Case 107 | 6 | 108,666     | 404,632     | 2 | 1 | 3 | 0 |
| Case 107 | 6 | 405,130     | 2,893,647   | 2 | 0 | 2 | 1 |
| Case 107 | 6 | 2,893,754   | 3,594,782   | 1 | 1 | 2 | 0 |
| Case 107 | 6 | 3,603,720   | 3,913,345   | 2 | 1 | 3 | 0 |
| Case 107 | 6 | 3,913,630   | 10,196,666  | 2 | 0 | 2 | 1 |
| Case 107 | 6 | 10,197,494  | 11,814,975  | 1 | 1 | 2 | 0 |
| Case 107 | 6 | 11,818,316  | 13,332,467  | 2 | 0 | 2 | 1 |
| Case 107 | 6 | 13,336,815  | 14,887,071  | 1 | 1 | 2 | 0 |
| Case 107 | 6 | 14,887,524  | 16,096,546  | 2 | 0 | 2 | 1 |
| Case 107 | 6 | 16,098,290  | 20,660,365  | 1 | 1 | 2 | 0 |
| Case 107 | 6 | 20,661,034  | 22,999,042  | 2 | 0 | 2 | 1 |
| Case 107 | 6 | 23,006,527  | 24,564,540  | 1 | 1 | 2 | 0 |
| Case 107 | 6 | 24,564,544  | 28,077,374  | 2 | 0 | 2 | 1 |
| Case 107 | 6 | 28,079,076  | 28,269,511  | 1 | 1 | 2 | 0 |
| Case 107 | 6 | 28,269,663  | 30,165,032  | 2 | 0 | 2 | 1 |
| Case 107 | 6 | 30,165,273  | 30,954,137  | 1 | 1 | 2 | 0 |
| Case 107 | 6 | 30,954,201  | 31,025,265  | 2 | 0 | 2 | 1 |
| Case 107 | 6 | 31,025,848  | 31,080,859  | 1 | 1 | 2 | 0 |
| Case 107 | 6 | 31,080,899  | 31,128,552  | 2 | 1 | 3 | 0 |
| Case 107 | 6 | 31,129,265  | 31,509,284  | 2 | 0 | 2 | 1 |
| Case 107 | 6 | 31,509,967  | 32,432,835  | 1 | 1 | 2 | 0 |
| Case 107 | 6 | 32,433,167  | 32,702,813  | 2 | 0 | 2 | 1 |
| Case 107 | 6 | 32,702,930  | 32,940,694  | 1 | 1 | 2 | 0 |
| Case 107 | 6 | 32,940,815  | 33,159,664  | 2 | 0 | 2 | 1 |
| Case 107 | 6 | 33,160,142  | 33,570,024  | 1 | 1 | 2 | 0 |
| Case 107 | 6 | 33,574,413  | 34,512,195  | 2 | 1 | 3 | 0 |
| Case 107 | 6 | 34,513,266  | 36,666,327  | 2 | 0 | 2 | 1 |
| Case 107 | 6 | 36,667,610  | 36,982,947  | 2 | 1 | 3 | 0 |
| Case 107 | 6 | 36,983,192  | 37,450,914  | 1 | 1 | 2 | 0 |
| Case 107 | 6 | 37,451,032  | 37,483,808  | 2 | 0 | 2 | 1 |
| Case 107 | 6 | 37,485,728  | 37,934,269  | 3 | 0 | 3 | 1 |
| Case 107 | 6 | 37,949,615  | 38,486,637  | 7 | 0 | 7 | 1 |
| Case 107 | 6 | 38,487,026  | 38,994,354  | 1 | 1 | 2 | 0 |
| Case 107 | 6 | 38,994,430  | 40,986,623  | 2 | 1 | 3 | 0 |
| Case 107 | 6 | 40,989,503  | 41,643,386  | 1 | 1 | 2 | 0 |
| Case 107 | 6 | 41,643,608  | 41,652,540  | 3 | 0 | 3 | 1 |
| Case 107 | 6 | 41,652,566  | 43,815,364  | 7 | 0 | 7 | 1 |
| Case 107 | 6 | 43,816,377  | 43,817,837  | 3 | 0 | 3 | 1 |
| Case 107 | 6 | 43,822,780  | 44,297,772  | 4 | 0 | 4 | 1 |
| Case 107 | 6 | 44,297,871  | 44,310,854  | 1 | 1 | 2 | 0 |
| Case 107 | 6 | 44,310,965  | 56,481,397  | 2 | 0 | 2 | 1 |
| Case 107 | 6 | 56,481,864  | 58,752,089  | 1 | 1 | 2 | 0 |
| Case 107 | 6 | 61,891,118  | 63,458,592  | 1 | 1 | 2 | 0 |
| Case 107 | 6 | 63,458,776  | 63,865,624  | 2 | 1 | 3 | 0 |
| Case 107 | 6 | 63,871,745  | 65,376,653  | 2 | 0 | 2 | 1 |
| Case 107 | 6 | 65,391,951  | 67,642,950  | 2 | 1 | 3 | 0 |
| Case 107 | 6 | 67,646,913  | 70,165,296  | 2 | 0 | 2 | 1 |
| Case 107 | 6 | 70,166,530  | 72,662,508  | 2 | 1 | 3 | 0 |
| Case 107 | 6 | 72,663,571  | 75,899,300  | 2 | 0 | 2 | 1 |
| Case 107 | 6 | 75,899,516  | 76,751,738  | 1 | 1 | 2 | 0 |
| Case 107 | 6 | 76,751,781  | 78,175,842  | 2 | 1 | 3 | 0 |
| Case 107 | 6 | 78,176,009  | 79,055,410  | 1 | 1 | 2 | 0 |
| Case 107 | 6 | 79,062,734  | 79,419,430  | 2 | 1 | 3 | 0 |
| Case 107 | 6 | 79,419,656  | 90,677,126  | 2 | 0 | 2 | 1 |
| Case 107 | 6 | 90,677,176  | 93,694,952  | 2 | 1 | 3 | 0 |
| Case 107 | 6 | 93,695,112  | 112,423,810 | 2 | 0 | 2 | 1 |
| Case 107 | 6 | 112,423,944 | 112,961,926 | 2 | 1 | 3 | 0 |
| Case 107 | 6 | 112,962,393 | 114,192,777 | 1 | 1 | 2 | 0 |

|          |   |             |             |   |   |   |   |
|----------|---|-------------|-------------|---|---|---|---|
| Case 107 | 6 | 114,194,523 | 125,027,223 | 2 | 0 | 2 | 1 |
| Case 107 | 6 | 125,035,966 | 126,491,310 | 1 | 1 | 2 | 0 |
| Case 107 | 6 | 126,522,821 | 129,670,548 | 2 | 0 | 2 | 1 |
| Case 107 | 6 | 129,671,311 | 129,993,895 | 2 | 1 | 3 | 0 |
| Case 107 | 6 | 129,996,025 | 132,119,366 | 1 | 1 | 2 | 0 |
| Case 107 | 6 | 132,124,599 | 134,715,654 | 2 | 0 | 2 | 1 |
| Case 107 | 6 | 134,720,067 | 147,704,113 | 3 | 0 | 3 | 1 |
| Case 107 | 6 | 147,706,242 | 148,255,082 | 2 | 0 | 2 | 1 |
| Case 107 | 6 | 148,258,033 | 149,809,094 | 3 | 0 | 3 | 1 |
| Case 107 | 6 | 149,814,762 | 150,538,665 | 2 | 0 | 2 | 1 |
| Case 107 | 6 | 150,547,144 | 164,690,972 | 3 | 0 | 3 | 1 |
| Case 107 | 6 | 164,691,459 | 165,945,970 | 3 | 1 | 4 | 0 |
| Case 107 | 6 | 165,946,772 | 170,980,171 | 3 | 0 | 3 | 1 |
| Case 107 | 7 | 44,935      | 2,789,880   | 2 | 1 | 3 | 0 |
| Case 107 | 7 | 2,792,524   | 4,820,940   | 2 | 0 | 2 | 1 |
| Case 107 | 7 | 4,821,257   | 4,874,735   | 3 | 0 | 3 | 1 |
| Case 107 | 7 | 4,876,055   | 30,486,592  | 2 | 0 | 2 | 1 |
| Case 107 | 7 | 30,487,951  | 31,375,757  | 3 | 0 | 3 | 1 |
| Case 107 | 7 | 31,377,369  | 58,019,061  | 2 | 0 | 2 | 1 |
| Case 107 | 7 | 61,056,053  | 90,629,849  | 2 | 0 | 2 | 1 |
| Case 107 | 7 | 90,630,558  | 92,130,846  | 3 | 0 | 3 | 1 |
| Case 107 | 7 | 92,130,876  | 94,536,510  | 4 | 0 | 4 | 1 |
| Case 107 | 7 | 94,539,536  | 94,540,770  | 1 | 1 | 2 | 0 |
| Case 107 | 7 | 94,540,810  | 99,810,406  | 3 | 0 | 3 | 1 |
| Case 107 | 7 | 99,811,388  | 100,309,544 | 4 | 0 | 4 | 1 |
| Case 107 | 7 | 100,313,768 | 100,385,532 | 1 | 1 | 2 | 0 |
| Case 107 | 7 | 100,386,859 | 100,477,829 | 2 | 1 | 3 | 0 |
| Case 107 | 7 | 100,479,167 | 100,675,761 | 1 | 1 | 2 | 0 |
| Case 107 | 7 | 100,675,817 | 100,685,948 | 1 | 0 | 1 | 0 |
| Case 107 | 7 | 100,685,994 | 100,839,654 | 1 | 1 | 2 | 0 |
| Case 107 | 7 | 100,841,533 | 117,960,973 | 2 | 0 | 2 | 1 |
| Case 107 | 7 | 117,965,390 | 122,139,167 | 2 | 1 | 3 | 0 |
| Case 107 | 7 | 122,143,539 | 128,454,943 | 2 | 0 | 2 | 1 |
| Case 107 | 7 | 128,454,955 | 128,788,002 | 2 | 1 | 3 | 0 |
| Case 107 | 7 | 128,789,884 | 149,379,276 | 2 | 0 | 2 | 1 |
| Case 107 | 7 | 149,381,716 | 150,068,439 | 2 | 1 | 3 | 0 |
| Case 107 | 7 | 150,068,503 | 159,119,486 | 2 | 0 | 2 | 1 |
| Case 107 | 8 | 164,984     | 572,628     | 2 | 1 | 3 | 0 |
| Case 107 | 8 | 573,646     | 1,782,876   | 1 | 1 | 2 | 0 |
| Case 107 | 8 | 1,784,859   | 1,920,461   | 2 | 0 | 2 | 1 |
| Case 107 | 8 | 1,921,160   | 3,167,898   | 1 | 1 | 2 | 0 |
| Case 107 | 8 | 3,168,573   | 3,296,720   | 2 | 0 | 2 | 1 |
| Case 107 | 8 | 3,303,050   | 4,179,086   | 2 | 1 | 3 | 0 |
| Case 107 | 8 | 4,179,859   | 5,250,086   | 1 | 1 | 2 | 0 |
| Case 107 | 8 | 5,252,599   | 5,603,275   | 2 | 1 | 3 | 0 |
| Case 107 | 8 | 5,604,495   | 5,929,378   | 1 | 1 | 2 | 0 |
| Case 107 | 8 | 5,929,952   | 6,817,024   | 2 | 1 | 3 | 0 |
| Case 107 | 8 | 6,820,464   | 8,171,487   | 1 | 1 | 2 | 0 |
| Case 107 | 8 | 8,171,978   | 8,997,614   | 2 | 1 | 3 | 0 |
| Case 107 | 8 | 8,997,623   | 9,831,907   | 1 | 1 | 2 | 0 |
| Case 107 | 8 | 9,834,684   | 11,665,518  | 2 | 1 | 3 | 0 |
| Case 107 | 8 | 11,666,337  | 38,433,937  | 1 | 1 | 2 | 0 |
| Case 107 | 8 | 38,437,040  | 41,716,521  | 2 | 1 | 3 | 0 |
| Case 107 | 8 | 41,727,195  | 43,791,691  | 1 | 1 | 2 | 0 |
| Case 107 | 8 | 46,886,735  | 53,548,616  | 1 | 1 | 2 | 0 |
| Case 107 | 8 | 53,553,177  | 56,550,203  | 2 | 1 | 3 | 0 |
| Case 107 | 8 | 56,567,649  | 58,766,472  | 1 | 1 | 2 | 0 |
| Case 107 | 8 | 58,766,723  | 65,810,061  | 2 | 1 | 3 | 0 |
| Case 107 | 8 | 65,818,520  | 66,285,716  | 3 | 1 | 4 | 0 |
| Case 107 | 8 | 66,287,730  | 68,793,432  | 3 | 0 | 3 | 1 |
| Case 107 | 8 | 68,799,377  | 74,329,796  | 3 | 1 | 4 | 0 |

|          |    |             |             |   |   |   |   |
|----------|----|-------------|-------------|---|---|---|---|
| Case 107 | 8  | 74,330,174  | 75,217,901  | 3 | 0 | 3 | 1 |
| Case 107 | 8  | 75,218,725  | 86,401,833  | 3 | 1 | 4 | 0 |
| Case 107 | 8  | 86,407,520  | 87,241,965  | 3 | 0 | 3 | 1 |
| Case 107 | 8  | 87,241,987  | 94,192,318  | 3 | 1 | 4 | 0 |
| Case 107 | 8  | 94,195,920  | 94,828,642  | 3 | 0 | 3 | 1 |
| Case 107 | 8  | 94,830,459  | 95,274,016  | 3 | 1 | 4 | 0 |
| Case 107 | 8  | 95,274,357  | 96,145,419  | 3 | 0 | 3 | 1 |
| Case 107 | 8  | 96,147,295  | 98,645,779  | 3 | 1 | 4 | 0 |
| Case 107 | 8  | 98,647,447  | 99,168,279  | 3 | 0 | 3 | 1 |
| Case 107 | 8  | 99,168,383  | 101,608,919 | 3 | 1 | 4 | 0 |
| Case 107 | 8  | 101,609,014 | 102,007,701 | 3 | 0 | 3 | 1 |
| Case 107 | 8  | 102,008,828 | 114,965,243 | 3 | 1 | 4 | 0 |
| Case 107 | 8  | 114,966,953 | 115,347,920 | 1 | 1 | 2 | 0 |
| Case 107 | 8  | 115,351,857 | 123,805,336 | 3 | 1 | 4 | 0 |
| Case 107 | 8  | 123,806,196 | 124,822,540 | 3 | 0 | 3 | 1 |
| Case 107 | 8  | 124,824,581 | 133,698,781 | 3 | 1 | 4 | 0 |
| Case 107 | 8  | 133,701,395 | 134,188,778 | 3 | 0 | 3 | 1 |
| Case 107 | 8  | 134,189,138 | 138,585,743 | 3 | 1 | 4 | 0 |
| Case 107 | 8  | 138,588,027 | 139,231,483 | 3 | 0 | 3 | 1 |
| Case 107 | 8  | 139,232,371 | 140,990,501 | 3 | 1 | 4 | 0 |
| Case 107 | 8  | 140,990,677 | 144,411,549 | 2 | 1 | 3 | 0 |
| Case 107 | 8  | 144,411,609 | 145,785,009 | 3 | 1 | 4 | 0 |
| Case 107 | 8  | 145,786,151 | 146,293,414 | 3 | 0 | 3 | 1 |
| Case 107 | 9  | 46,587      | 9,092,671   | 1 | 1 | 2 | 0 |
| Case 107 | 9  | 9,093,111   | 9,553,037   | 1 | 0 | 1 | 0 |
| Case 107 | 9  | 9,556,992   | 10,581,485  | 1 | 1 | 2 | 0 |
| Case 107 | 9  | 10,582,246  | 25,562,784  | 1 | 0 | 1 | 0 |
| Case 107 | 9  | 25,564,648  | 25,594,961  | 1 | 1 | 2 | 0 |
| Case 107 | 9  | 25,598,014  | 25,988,943  | 7 | 0 | 7 | 1 |
| Case 107 | 9  | 26,003,296  | 26,035,315  | 3 | 0 | 3 | 1 |
| Case 107 | 9  | 26,038,217  | 26,210,349  | 0 | 0 | 0 | 0 |
| Case 107 | 9  | 26,210,446  | 26,273,887  | 3 | 0 | 3 | 1 |
| Case 107 | 9  | 26,275,374  | 26,458,557  | 6 | 1 | 7 | 0 |
| Case 107 | 9  | 26,463,378  | 27,309,659  | 4 | 0 | 4 | 1 |
| Case 107 | 9  | 27,313,439  | 27,707,461  | 2 | 1 | 3 | 0 |
| Case 107 | 9  | 27,707,666  | 32,487,627  | 4 | 1 | 5 | 0 |
| Case 107 | 9  | 32,487,912  | 32,539,717  | 7 | 0 | 7 | 1 |
| Case 107 | 9  | 32,541,468  | 32,632,339  | 3 | 0 | 3 | 1 |
| Case 107 | 9  | 32,632,775  | 43,581,253  | 4 | 0 | 4 | 1 |
| Case 107 | 9  | 43,627,237  | 46,944,322  | 1 | 1 | 2 | 0 |
| Case 107 | 9  | 65,629,772  | 95,378,704  | 1 | 1 | 2 | 0 |
| Case 107 | 9  | 95,381,802  | 98,972,430  | 2 | 1 | 3 | 0 |
| Case 107 | 9  | 98,974,141  | 135,934,431 | 1 | 1 | 2 | 0 |
| Case 107 | 9  | 135,940,433 | 135,957,452 | 7 | 0 | 7 | 1 |
| Case 107 | 9  | 135,966,362 | 136,279,935 | 1 | 1 | 2 | 0 |
| Case 107 | 9  | 136,280,025 | 137,520,936 | 2 | 1 | 3 | 0 |
| Case 107 | 9  | 137,530,346 | 139,110,993 | 1 | 1 | 2 | 0 |
| Case 107 | 9  | 139,111,870 | 139,286,458 | 2 | 1 | 3 | 0 |
| Case 107 | 9  | 139,288,732 | 139,374,952 | 1 | 1 | 2 | 0 |
| Case 107 | 9  | 139,375,962 | 140,414,411 | 2 | 1 | 3 | 0 |
| Case 107 | 9  | 140,414,461 | 141,066,491 | 1 | 1 | 2 | 0 |
| Case 107 | 10 | 98,087      | 1,507,960   | 2 | 1 | 3 | 0 |
| Case 107 | 10 | 1,509,658   | 3,627,637   | 1 | 1 | 2 | 0 |
| Case 107 | 10 | 3,628,517   | 7,337,689   | 2 | 1 | 3 | 0 |
| Case 107 | 10 | 7,339,312   | 8,111,409   | 1 | 1 | 2 | 0 |
| Case 107 | 10 | 8,115,362   | 12,435,379  | 2 | 1 | 3 | 0 |
| Case 107 | 10 | 12,436,252  | 12,778,614  | 1 | 1 | 2 | 0 |
| Case 107 | 10 | 12,778,841  | 16,536,461  | 2 | 1 | 3 | 0 |
| Case 107 | 10 | 16,539,483  | 17,147,521  | 1 | 1 | 2 | 0 |
| Case 107 | 10 | 17,151,662  | 21,216,368  | 2 | 1 | 3 | 0 |
| Case 107 | 10 | 21,218,979  | 22,496,104  | 1 | 1 | 2 | 0 |

|          |    |             |             |   |   |   |   |
|----------|----|-------------|-------------|---|---|---|---|
| Case 107 | 10 | 22,496,669  | 28,373,644  | 2 | 1 | 3 | 0 |
| Case 107 | 10 | 28,375,931  | 29,091,723  | 1 | 1 | 2 | 0 |
| Case 107 | 10 | 29,093,379  | 36,929,886  | 2 | 1 | 3 | 0 |
| Case 107 | 10 | 36,949,132  | 38,343,858  | 1 | 1 | 2 | 0 |
| Case 107 | 10 | 38,344,125  | 39,097,912  | 2 | 0 | 2 | 1 |
| Case 107 | 10 | 42,436,301  | 43,128,880  | 2 | 0 | 2 | 1 |
| Case 107 | 10 | 43,142,034  | 69,917,242  | 2 | 1 | 3 | 0 |
| Case 107 | 10 | 69,917,811  | 70,749,869  | 1 | 1 | 2 | 0 |
| Case 107 | 10 | 70,759,289  | 71,307,920  | 2 | 1 | 3 | 0 |
| Case 107 | 10 | 71,310,732  | 72,893,339  | 3 | 1 | 4 | 0 |
| Case 107 | 10 | 72,902,886  | 72,903,531  | 3 | 0 | 3 | 1 |
| Case 107 | 10 | 72,904,464  | 78,589,532  | 5 | 0 | 5 | 1 |
| Case 107 | 10 | 78,593,852  | 81,885,914  | 7 | 0 | 7 | 1 |
| Case 107 | 10 | 81,891,206  | 81,927,219  | 1 | 1 | 2 | 0 |
| Case 107 | 10 | 81,928,765  | 82,385,041  | 7 | 0 | 7 | 1 |
| Case 107 | 10 | 82,390,456  | 82,390,738  | 3 | 0 | 3 | 1 |
| Case 107 | 10 | 82,392,100  | 82,547,720  | 5 | 0 | 5 | 1 |
| Case 107 | 10 | 82,553,046  | 83,060,356  | 3 | 1 | 4 | 0 |
| Case 107 | 10 | 83,070,163  | 134,787,650 | 1 | 1 | 2 | 0 |
| Case 107 | 10 | 134,788,714 | 135,278,193 | 2 | 1 | 3 | 0 |
| Case 107 | 10 | 135,284,115 | 135,477,883 | 1 | 1 | 2 | 0 |
| Case 107 | 11 | 193,146     | 264,391     | 3 | 0 | 3 | 1 |
| Case 107 | 11 | 268,219     | 577,534     | 3 | 1 | 4 | 0 |
| Case 107 | 11 | 587,343     | 2,424,541   | 3 | 0 | 3 | 1 |
| Case 107 | 11 | 2,424,553   | 2,908,965   | 4 | 0 | 4 | 1 |
| Case 107 | 11 | 2,909,513   | 47,907,641  | 3 | 0 | 3 | 1 |
| Case 107 | 11 | 47,922,672  | 48,449,889  | 0 | 0 | 0 | 0 |
| Case 107 | 11 | 48,457,439  | 49,537,617  | 3 | 0 | 3 | 1 |
| Case 107 | 11 | 49,542,457  | 51,591,253  | 2 | 0 | 2 | 1 |
| Case 107 | 11 | 54,794,237  | 55,432,740  | 2 | 0 | 2 | 1 |
| Case 107 | 11 | 55,432,823  | 66,453,406  | 3 | 0 | 3 | 1 |
| Case 107 | 11 | 66,454,564  | 70,002,689  | 4 | 0 | 4 | 1 |
| Case 107 | 11 | 70,002,886  | 104,900,466 | 3 | 0 | 3 | 1 |
| Case 107 | 11 | 104,900,535 | 105,239,441 | 0 | 0 | 0 | 0 |
| Case 107 | 11 | 105,251,489 | 128,649,851 | 3 | 0 | 3 | 1 |
| Case 107 | 11 | 128,651,219 | 131,734,784 | 4 | 0 | 4 | 1 |
| Case 107 | 11 | 131,734,999 | 131,758,498 | 1 | 1 | 2 | 0 |
| Case 107 | 11 | 131,759,684 | 133,789,785 | 3 | 0 | 3 | 1 |
| Case 107 | 11 | 133,789,790 | 134,934,063 | 4 | 0 | 4 | 1 |
| Case 107 | 12 | 191,619     | 319,125     | 3 | 0 | 3 | 1 |
| Case 107 | 12 | 321,353     | 893,967     | 2 | 0 | 2 | 1 |
| Case 107 | 12 | 905,582     | 1,601,024   | 1 | 0 | 1 | 0 |
| Case 107 | 12 | 1,601,561   | 1,611,846   | 1 | 1 | 2 | 0 |
| Case 107 | 12 | 1,618,202   | 4,737,673   | 2 | 0 | 2 | 1 |
| Case 107 | 12 | 4,737,715   | 4,875,615   | 1 | 0 | 1 | 0 |
| Case 107 | 12 | 4,881,610   | 24,488,865  | 2 | 0 | 2 | 1 |
| Case 107 | 12 | 24,496,747  | 25,051,265  | 3 | 0 | 3 | 1 |
| Case 107 | 12 | 25,051,357  | 25,478,225  | 5 | 0 | 5 | 1 |
| Case 107 | 12 | 25,479,948  | 31,095,036  | 3 | 0 | 3 | 1 |
| Case 107 | 12 | 31,098,240  | 31,810,126  | 3 | 1 | 4 | 0 |
| Case 107 | 12 | 31,810,824  | 32,050,598  | 1 | 1 | 2 | 0 |
| Case 107 | 12 | 32,052,422  | 34,853,011  | 2 | 0 | 2 | 1 |
| Case 107 | 12 | 37,876,400  | 42,946,285  | 2 | 0 | 2 | 1 |
| Case 107 | 12 | 42,950,977  | 43,326,899  | 2 | 1 | 3 | 0 |
| Case 107 | 12 | 43,327,892  | 45,960,118  | 2 | 0 | 2 | 1 |
| Case 107 | 12 | 45,961,947  | 47,471,980  | 1 | 1 | 2 | 0 |
| Case 107 | 12 | 47,472,156  | 50,364,707  | 2 | 0 | 2 | 1 |
| Case 107 | 12 | 50,364,898  | 51,203,291  | 1 | 0 | 1 | 0 |
| Case 107 | 12 | 51,203,371  | 56,625,946  | 2 | 0 | 2 | 1 |
| Case 107 | 12 | 56,626,573  | 58,359,547  | 1 | 1 | 2 | 0 |
| Case 107 | 12 | 58,360,970  | 68,510,585  | 2 | 1 | 3 | 0 |

|          |    |             |             |   |   |   |   |
|----------|----|-------------|-------------|---|---|---|---|
| Case 107 | 12 | 68,516,129  | 69,326,547  | 1 | 1 | 2 | 0 |
| Case 107 | 12 | 69,340,369  | 76,547,820  | 2 | 1 | 3 | 0 |
| Case 107 | 12 | 76,548,473  | 78,248,487  | 1 | 1 | 2 | 0 |
| Case 107 | 12 | 78,251,685  | 94,491,385  | 2 | 1 | 3 | 0 |
| Case 107 | 12 | 94,499,677  | 97,433,614  | 1 | 1 | 2 | 0 |
| Case 107 | 12 | 97,434,220  | 104,129,802 | 2 | 1 | 3 | 0 |
| Case 107 | 12 | 104,130,847 | 105,455,217 | 1 | 1 | 2 | 0 |
| Case 107 | 12 | 105,456,710 | 106,739,726 | 2 | 1 | 3 | 0 |
| Case 107 | 12 | 106,740,069 | 108,930,109 | 1 | 1 | 2 | 0 |
| Case 107 | 12 | 108,930,319 | 109,804,222 | 2 | 1 | 3 | 0 |
| Case 107 | 12 | 109,810,116 | 113,280,973 | 1 | 1 | 2 | 0 |
| Case 107 | 12 | 113,281,621 | 114,697,301 | 2 | 1 | 3 | 0 |
| Case 107 | 12 | 114,698,881 | 123,311,981 | 1 | 1 | 2 | 0 |
| Case 107 | 12 | 123,333,065 | 123,494,398 | 2 | 1 | 3 | 0 |
| Case 107 | 12 | 123,494,520 | 124,298,332 | 1 | 1 | 2 | 0 |
| Case 107 | 12 | 124,303,579 | 126,433,433 | 2 | 1 | 3 | 0 |
| Case 107 | 12 | 126,436,539 | 128,537,287 | 1 | 1 | 2 | 0 |
| Case 107 | 12 | 128,538,213 | 129,299,326 | 2 | 1 | 3 | 0 |
| Case 107 | 12 | 129,299,333 | 131,797,608 | 1 | 1 | 2 | 0 |
| Case 107 | 12 | 131,800,059 | 131,971,976 | 2 | 1 | 3 | 0 |
| Case 107 | 12 | 131,972,307 | 132,624,220 | 1 | 1 | 2 | 0 |
| Case 107 | 12 | 132,624,232 | 133,810,935 | 2 | 1 | 3 | 0 |
| Case 107 | 13 | 19,058,717  | 21,715,602  | 3 | 1 | 4 | 0 |
| Case 107 | 13 | 21,722,407  | 21,725,633  | 3 | 0 | 3 | 1 |
| Case 107 | 13 | 21,728,755  | 21,746,637  | 6 | 1 | 7 | 0 |
| Case 107 | 13 | 21,747,051  | 21,923,751  | 3 | 0 | 3 | 1 |
| Case 107 | 13 | 21,923,955  | 32,749,758  | 3 | 1 | 4 | 0 |
| Case 107 | 13 | 32,750,910  | 35,012,553  | 2 | 1 | 3 | 0 |
| Case 107 | 13 | 35,017,286  | 83,448,431  | 3 | 1 | 4 | 0 |
| Case 107 | 13 | 83,458,158  | 84,981,151  | 2 | 1 | 3 | 0 |
| Case 107 | 13 | 84,982,296  | 89,259,929  | 3 | 1 | 4 | 0 |
| Case 107 | 13 | 89,266,458  | 98,729,577  | 3 | 0 | 3 | 1 |
| Case 107 | 13 | 98,730,360  | 101,935,287 | 2 | 1 | 3 | 0 |
| Case 107 | 13 | 101,936,021 | 103,143,157 | 3 | 1 | 4 | 0 |
| Case 107 | 13 | 103,144,280 | 103,577,244 | 2 | 1 | 3 | 0 |
| Case 107 | 13 | 103,581,851 | 108,752,436 | 3 | 1 | 4 | 0 |
| Case 107 | 13 | 108,757,919 | 114,131,954 | 2 | 1 | 3 | 0 |
| Case 107 | 13 | 114,134,903 | 115,103,529 | 3 | 1 | 4 | 0 |
| Case 107 | 14 | 19,280,733  | 20,711,681  | 1 | 0 | 1 | 0 |
| Case 107 | 14 | 20,711,688  | 21,638,324  | 1 | 1 | 2 | 0 |
| Case 107 | 14 | 21,646,370  | 21,977,497  | 1 | 0 | 1 | 0 |
| Case 107 | 14 | 21,977,962  | 30,870,187  | 1 | 1 | 2 | 0 |
| Case 107 | 14 | 30,872,884  | 32,184,250  | 1 | 0 | 1 | 0 |
| Case 107 | 14 | 32,204,263  | 39,413,191  | 1 | 1 | 2 | 0 |
| Case 107 | 14 | 39,413,518  | 40,180,117  | 1 | 0 | 1 | 0 |
| Case 107 | 14 | 40,183,285  | 41,773,825  | 1 | 1 | 2 | 0 |
| Case 107 | 14 | 41,776,000  | 42,249,022  | 1 | 0 | 1 | 0 |
| Case 107 | 14 | 42,251,751  | 45,400,736  | 1 | 1 | 2 | 0 |
| Case 107 | 14 | 45,403,373  | 46,046,391  | 1 | 0 | 1 | 0 |
| Case 107 | 14 | 46,051,450  | 49,696,997  | 1 | 1 | 2 | 0 |
| Case 107 | 14 | 49,699,821  | 50,992,936  | 1 | 0 | 1 | 0 |
| Case 107 | 14 | 51,025,964  | 52,922,071  | 1 | 1 | 2 | 0 |
| Case 107 | 14 | 52,922,151  | 53,283,565  | 1 | 0 | 1 | 0 |
| Case 107 | 14 | 53,289,281  | 58,669,403  | 1 | 1 | 2 | 0 |
| Case 107 | 14 | 58,669,409  | 59,033,475  | 1 | 0 | 1 | 0 |
| Case 107 | 14 | 59,039,168  | 64,061,825  | 1 | 1 | 2 | 0 |
| Case 107 | 14 | 64,065,556  | 64,679,747  | 1 | 0 | 1 | 0 |
| Case 107 | 14 | 64,680,848  | 66,509,798  | 1 | 1 | 2 | 0 |
| Case 107 | 14 | 66,513,063  | 67,854,986  | 1 | 0 | 1 | 0 |
| Case 107 | 14 | 67,857,432  | 73,756,226  | 1 | 1 | 2 | 0 |
| Case 107 | 14 | 73,756,299  | 74,601,396  | 1 | 0 | 1 | 0 |

|          |    |            |             |   |   |   |   |
|----------|----|------------|-------------|---|---|---|---|
| Case 107 | 14 | 74,631,757 | 75,154,099  | 1 | 1 | 2 | 0 |
| Case 107 | 14 | 75,159,007 | 75,678,634  | 1 | 0 | 1 | 0 |
| Case 107 | 14 | 75,682,982 | 78,694,817  | 1 | 1 | 2 | 0 |
| Case 107 | 14 | 78,696,127 | 80,363,738  | 1 | 0 | 1 | 0 |
| Case 107 | 14 | 80,373,231 | 84,463,633  | 1 | 1 | 2 | 0 |
| Case 107 | 14 | 84,470,613 | 85,191,475  | 1 | 0 | 1 | 0 |
| Case 107 | 14 | 85,192,915 | 89,680,597  | 1 | 1 | 2 | 0 |
| Case 107 | 14 | 89,681,020 | 90,864,848  | 1 | 0 | 1 | 0 |
| Case 107 | 14 | 90,866,346 | 92,102,932  | 1 | 1 | 2 | 0 |
| Case 107 | 14 | 92,103,862 | 92,583,867  | 1 | 0 | 1 | 0 |
| Case 107 | 14 | 92,583,881 | 107,287,663 | 1 | 1 | 2 | 0 |
| Case 107 | 15 | 20,034,919 | 20,212,798  | 1 | 0 | 1 | 0 |
| Case 107 | 15 | 20,612,840 | 22,427,966  | 4 | 0 | 4 | 1 |
| Case 107 | 15 | 22,652,330 | 40,866,129  | 1 | 1 | 2 | 0 |
| Case 107 | 15 | 40,866,186 | 40,952,261  | 1 | 0 | 1 | 0 |
| Case 107 | 15 | 40,959,624 | 42,127,202  | 1 | 1 | 2 | 0 |
| Case 107 | 15 | 42,127,221 | 42,178,519  | 2 | 1 | 3 | 0 |
| Case 107 | 15 | 42,179,424 | 42,459,024  | 1 | 1 | 2 | 0 |
| Case 107 | 15 | 42,459,105 | 44,959,132  | 1 | 0 | 1 | 0 |
| Case 107 | 15 | 44,961,197 | 50,519,322  | 1 | 1 | 2 | 0 |
| Case 107 | 15 | 50,521,709 | 51,265,986  | 1 | 0 | 1 | 0 |
| Case 107 | 15 | 51,276,128 | 55,351,881  | 1 | 1 | 2 | 0 |
| Case 107 | 15 | 55,352,945 | 56,321,854  | 1 | 0 | 1 | 0 |
| Case 107 | 15 | 56,324,451 | 63,690,544  | 1 | 1 | 2 | 0 |
| Case 107 | 15 | 63,691,502 | 65,030,792  | 1 | 0 | 1 | 0 |
| Case 107 | 15 | 65,031,441 | 65,714,746  | 1 | 1 | 2 | 0 |
| Case 107 | 15 | 65,718,997 | 66,198,459  | 1 | 0 | 1 | 0 |
| Case 107 | 15 | 66,199,495 | 66,553,759  | 1 | 1 | 2 | 0 |
| Case 107 | 15 | 66,556,154 | 66,850,340  | 1 | 0 | 1 | 0 |
| Case 107 | 15 | 66,850,362 | 70,949,424  | 1 | 1 | 2 | 0 |
| Case 107 | 15 | 70,951,141 | 71,349,045  | 1 | 0 | 1 | 0 |
| Case 107 | 15 | 71,359,335 | 86,420,432  | 1 | 1 | 2 | 0 |
| Case 107 | 15 | 86,427,595 | 86,943,591  | 2 | 0 | 2 | 1 |
| Case 107 | 15 | 86,947,468 | 87,701,586  | 2 | 1 | 3 | 0 |
| Case 107 | 15 | 87,705,427 | 88,414,298  | 1 | 1 | 2 | 0 |
| Case 107 | 15 | 88,419,424 | 88,736,309  | 2 | 1 | 3 | 0 |
| Case 107 | 15 | 88,736,975 | 93,576,982  | 2 | 0 | 2 | 1 |
| Case 107 | 15 | 93,577,383 | 94,878,473  | 2 | 1 | 3 | 0 |
| Case 107 | 15 | 94,880,611 | 97,160,237  | 2 | 0 | 2 | 1 |
| Case 107 | 15 | 97,160,776 | 102,461,162 | 1 | 1 | 2 | 0 |
| Case 107 | 16 | 88,165     | 2,348,517   | 2 | 1 | 3 | 0 |
| Case 107 | 16 | 2,348,518  | 4,033,324   | 1 | 1 | 2 | 0 |
| Case 107 | 16 | 4,033,436  | 5,671,694   | 2 | 1 | 3 | 0 |
| Case 107 | 16 | 5,672,424  | 8,731,353   | 1 | 1 | 2 | 0 |
| Case 107 | 16 | 8,732,950  | 9,034,826   | 2 | 0 | 2 | 1 |
| Case 107 | 16 | 9,035,124  | 9,930,055   | 2 | 1 | 3 | 0 |
| Case 107 | 16 | 9,934,936  | 11,647,492  | 2 | 0 | 2 | 1 |
| Case 107 | 16 | 11,647,497 | 12,510,643  | 1 | 1 | 2 | 0 |
| Case 107 | 16 | 12,511,485 | 12,778,076  | 2 | 1 | 3 | 0 |
| Case 107 | 16 | 12,780,440 | 27,356,203  | 1 | 1 | 2 | 0 |
| Case 107 | 16 | 27,356,224 | 31,090,452  | 2 | 0 | 2 | 1 |
| Case 107 | 16 | 31,090,645 | 31,737,373  | 2 | 1 | 3 | 0 |
| Case 107 | 16 | 31,743,663 | 35,285,582  | 2 | 0 | 2 | 1 |
| Case 107 | 16 | 46,450,037 | 46,652,126  | 2 | 0 | 2 | 1 |
| Case 107 | 16 | 46,652,188 | 49,685,684  | 3 | 0 | 3 | 1 |
| Case 107 | 16 | 49,685,986 | 52,990,046  | 4 | 0 | 4 | 1 |
| Case 107 | 16 | 52,997,498 | 52,997,863  | 1 | 1 | 2 | 0 |
| Case 107 | 16 | 53,010,486 | 55,845,351  | 7 | 0 | 7 | 1 |
| Case 107 | 16 | 55,850,708 | 58,511,896  | 1 | 1 | 2 | 0 |
| Case 107 | 16 | 58,515,425 | 59,078,337  | 1 | 0 | 1 | 0 |
| Case 107 | 16 | 59,080,387 | 61,283,766  | 1 | 1 | 2 | 0 |

|          |    |            |            |   |   |   |   |
|----------|----|------------|------------|---|---|---|---|
| Case 107 | 16 | 61,307,058 | 62,459,308 | 1 | 0 | 1 | 0 |
| Case 107 | 16 | 62,468,804 | 68,083,442 | 1 | 1 | 2 | 0 |
| Case 107 | 16 | 68,099,821 | 69,454,734 | 1 | 0 | 1 | 0 |
| Case 107 | 16 | 69,455,528 | 70,954,915 | 1 | 1 | 2 | 0 |
| Case 107 | 16 | 70,954,956 | 72,992,667 | 1 | 0 | 1 | 0 |
| Case 107 | 16 | 72,992,763 | 73,869,949 | 1 | 1 | 2 | 0 |
| Case 107 | 16 | 73,875,786 | 75,225,548 | 1 | 0 | 1 | 0 |
| Case 107 | 16 | 75,225,948 | 77,323,210 | 1 | 1 | 2 | 0 |
| Case 107 | 16 | 77,323,211 | 77,692,030 | 1 | 0 | 1 | 0 |
| Case 107 | 16 | 77,694,091 | 78,386,295 | 1 | 1 | 2 | 0 |
| Case 107 | 16 | 78,387,304 | 78,837,743 | 1 | 0 | 1 | 0 |
| Case 107 | 16 | 78,837,772 | 81,008,860 | 1 | 1 | 2 | 0 |
| Case 107 | 16 | 81,009,899 | 81,171,635 | 1 | 0 | 1 | 0 |
| Case 107 | 16 | 81,172,338 | 84,093,697 | 1 | 1 | 2 | 0 |
| Case 107 | 16 | 84,094,363 | 84,209,609 | 1 | 0 | 1 | 0 |
| Case 107 | 16 | 84,209,660 | 90,274,695 | 1 | 1 | 2 | 0 |
| Case 107 | 17 | 11,885     | 1,945,995  | 2 | 0 | 2 | 1 |
| Case 107 | 17 | 1,945,998  | 2,453,908  | 1 | 0 | 1 | 0 |
| Case 107 | 17 | 2,455,523  | 3,935,223  | 2 | 0 | 2 | 1 |
| Case 107 | 17 | 3,936,043  | 4,278,835  | 1 | 0 | 1 | 0 |
| Case 107 | 17 | 4,299,256  | 4,315,506  | 1 | 1 | 2 | 0 |
| Case 107 | 17 | 4,319,606  | 4,385,099  | 7 | 0 | 7 | 1 |
| Case 107 | 17 | 4,385,503  | 10,253,908 | 2 | 0 | 2 | 1 |
| Case 107 | 17 | 10,258,433 | 10,534,983 | 1 | 0 | 1 | 0 |
| Case 107 | 17 | 10,535,216 | 10,542,471 | 1 | 1 | 2 | 0 |
| Case 107 | 17 | 10,542,472 | 20,676,134 | 2 | 0 | 2 | 1 |
| Case 107 | 17 | 20,681,137 | 20,816,341 | 2 | 1 | 3 | 0 |
| Case 107 | 17 | 20,819,995 | 21,490,090 | 4 | 1 | 5 | 0 |
| Case 107 | 17 | 21,503,147 | 21,528,062 | 7 | 0 | 7 | 1 |
| Case 107 | 17 | 21,539,613 | 22,242,355 | 1 | 1 | 2 | 0 |
| Case 107 | 17 | 25,268,142 | 25,373,369 | 1 | 1 | 2 | 0 |
| Case 107 | 17 | 25,375,921 | 27,448,045 | 2 | 1 | 3 | 0 |
| Case 107 | 17 | 27,448,121 | 29,663,677 | 1 | 1 | 2 | 0 |
| Case 107 | 17 | 29,663,884 | 36,891,573 | 2 | 1 | 3 | 0 |
| Case 107 | 17 | 36,892,403 | 37,303,198 | 1 | 1 | 2 | 0 |
| Case 107 | 17 | 37,316,988 | 37,343,130 | 7 | 0 | 7 | 1 |
| Case 107 | 17 | 37,347,839 | 37,627,837 | 1 | 1 | 2 | 0 |
| Case 107 | 17 | 37,629,484 | 40,841,001 | 2 | 1 | 3 | 0 |
| Case 107 | 17 | 40,841,014 | 41,776,686 | 1 | 1 | 2 | 0 |
| Case 107 | 17 | 41,780,484 | 43,313,597 | 2 | 1 | 3 | 0 |
| Case 107 | 17 | 43,318,566 | 45,005,095 | 2 | 0 | 2 | 1 |
| Case 107 | 17 | 45,006,896 | 45,772,932 | 1 | 0 | 1 | 0 |
| Case 107 | 17 | 45,773,594 | 45,822,472 | 1 | 1 | 2 | 0 |
| Case 107 | 17 | 45,822,901 | 56,581,490 | 2 | 0 | 2 | 1 |
| Case 107 | 17 | 56,581,506 | 60,664,361 | 1 | 1 | 2 | 0 |
| Case 107 | 17 | 60,669,332 | 61,820,902 | 2 | 1 | 3 | 0 |
| Case 107 | 17 | 61,822,223 | 63,995,268 | 1 | 1 | 2 | 0 |
| Case 107 | 17 | 64,001,862 | 65,630,262 | 2 | 1 | 3 | 0 |
| Case 107 | 17 | 65,631,670 | 66,928,473 | 1 | 1 | 2 | 0 |
| Case 107 | 17 | 66,928,538 | 69,111,098 | 2 | 1 | 3 | 0 |
| Case 107 | 17 | 69,115,146 | 70,004,689 | 2 | 0 | 2 | 1 |
| Case 107 | 17 | 70,015,234 | 70,021,748 | 3 | 0 | 3 | 1 |
| Case 107 | 17 | 70,023,827 | 70,790,286 | 2 | 2 | 4 | 0 |
| Case 107 | 17 | 70,790,777 | 70,870,511 | 3 | 0 | 3 | 1 |
| Case 107 | 17 | 70,877,779 | 76,559,529 | 2 | 1 | 3 | 0 |
| Case 107 | 17 | 76,559,768 | 76,834,760 | 1 | 1 | 2 | 0 |
| Case 107 | 17 | 76,839,135 | 76,909,235 | 2 | 1 | 3 | 0 |
| Case 107 | 17 | 76,913,843 | 77,079,876 | 3 | 0 | 3 | 1 |
| Case 107 | 17 | 77,080,633 | 77,080,700 | 2 | 1 | 3 | 0 |
| Case 107 | 17 | 77,080,751 | 81,060,040 | 2 | 2 | 4 | 0 |
| Case 107 | 18 | 87,505     | 15,375,878 | 1 | 1 | 2 | 0 |



|          |    |            |            |   |   |   |   |
|----------|----|------------|------------|---|---|---|---|
| Case 107 | 18 | 18,520,354 | 72,550,168 | 1 | 1 | 2 | 0 |
| Case 107 | 18 | 72,551,054 | 72,914,075 | 2 | 1 | 3 | 0 |
| Case 107 | 18 | 72,914,108 | 77,288,806 | 1 | 1 | 2 | 0 |
| Case 107 | 18 | 77,290,985 | 78,015,180 | 2 | 1 | 3 | 0 |
| Case 107 | 19 | 260,912    | 9,243,258  | 2 | 0 | 2 | 1 |
| Case 107 | 19 | 9,246,205  | 9,251,220  | 3 | 0 | 3 | 1 |
| Case 107 | 19 | 9,253,139  | 9,921,880  | 0 | 0 | 0 | 0 |
| Case 107 | 19 | 9,921,889  | 11,905,343 | 2 | 0 | 2 | 1 |
| Case 107 | 19 | 11,908,397 | 11,915,185 | 3 | 0 | 3 | 1 |
| Case 107 | 19 | 11,916,890 | 12,188,266 | 0 | 0 | 0 | 0 |
| Case 107 | 19 | 12,196,190 | 12,196,190 | 1 | 0 | 1 | 0 |
| Case 107 | 19 | 12,199,755 | 12,202,441 | 3 | 0 | 3 | 1 |
| Case 107 | 19 | 12,214,585 | 12,214,585 | 1 | 0 | 1 | 0 |
| Case 107 | 19 | 12,221,700 | 19,887,292 | 2 | 0 | 2 | 1 |
| Case 107 | 19 | 19,887,578 | 20,866,028 | 1 | 0 | 1 | 0 |
| Case 107 | 19 | 20,873,090 | 24,629,285 | 2 | 0 | 2 | 1 |
| Case 107 | 19 | 27,732,159 | 36,871,730 | 2 | 0 | 2 | 1 |
| Case 107 | 19 | 36,876,843 | 38,138,716 | 1 | 0 | 1 | 0 |
| Case 107 | 19 | 38,138,887 | 40,363,916 | 2 | 0 | 2 | 1 |
| Case 107 | 19 | 40,363,917 | 40,446,140 | 3 | 0 | 3 | 1 |
| Case 107 | 19 | 40,447,257 | 40,657,509 | 0 | 0 | 0 | 0 |
| Case 107 | 19 | 40,658,577 | 40,875,874 | 3 | 0 | 3 | 1 |
| Case 107 | 19 | 40,876,029 | 44,467,096 | 2 | 0 | 2 | 1 |
| Case 107 | 19 | 44,467,405 | 44,681,875 | 1 | 0 | 1 | 0 |
| Case 107 | 19 | 44,686,807 | 44,696,257 | 1 | 1 | 2 | 0 |
| Case 107 | 19 | 44,702,679 | 52,496,149 | 2 | 0 | 2 | 1 |
| Case 107 | 19 | 52,496,176 | 54,109,471 | 1 | 0 | 1 | 0 |
| Case 107 | 19 | 54,109,807 | 56,816,415 | 2 | 0 | 2 | 1 |
| Case 107 | 19 | 56,821,673 | 57,132,942 | 1 | 0 | 1 | 0 |
| Case 107 | 19 | 57,132,968 | 57,133,017 | 1 | 1 | 2 | 0 |
| Case 107 | 19 | 57,133,077 | 57,608,342 | 2 | 0 | 2 | 1 |
| Case 107 | 19 | 57,608,596 | 58,505,240 | 1 | 0 | 1 | 0 |
| Case 107 | 19 | 58,506,237 | 58,565,052 | 1 | 1 | 2 | 0 |
| Case 107 | 19 | 58,565,178 | 59,097,160 | 2 | 0 | 2 | 1 |
| Case 107 | 20 | 63,244     | 91,707     | 3 | 0 | 3 | 1 |
| Case 107 | 20 | 92,527     | 145,853    | 4 | 0 | 4 | 1 |
| Case 107 | 20 | 153,267    | 3,268,330  | 1 | 1 | 2 | 0 |
| Case 107 | 20 | 3,274,852  | 3,624,704  | 1 | 0 | 1 | 0 |
| Case 107 | 20 | 3,624,844  | 5,833,688  | 1 | 1 | 2 | 0 |
| Case 107 | 20 | 5,834,483  | 6,016,236  | 1 | 0 | 1 | 0 |
| Case 107 | 20 | 6,017,539  | 23,375,624 | 1 | 1 | 2 | 0 |
| Case 107 | 20 | 23,377,717 | 25,305,250 | 7 | 0 | 7 | 1 |
| Case 107 | 20 | 25,319,976 | 26,293,985 | 3 | 0 | 3 | 1 |
| Case 107 | 20 | 29,425,357 | 39,833,324 | 3 | 0 | 3 | 1 |
| Case 107 | 20 | 39,833,403 | 42,885,823 | 5 | 0 | 5 | 1 |
| Case 107 | 20 | 42,885,925 | 42,969,948 | 3 | 0 | 3 | 1 |
| Case 107 | 20 | 42,970,854 | 43,400,262 | 7 | 0 | 7 | 1 |
| Case 107 | 20 | 43,402,696 | 43,430,490 | 3 | 0 | 3 | 1 |
| Case 107 | 20 | 43,436,437 | 43,836,062 | 5 | 0 | 5 | 1 |
| Case 107 | 20 | 43,836,173 | 43,851,523 | 3 | 0 | 3 | 1 |
| Case 107 | 20 | 43,851,696 | 50,220,677 | 5 | 0 | 5 | 1 |
| Case 107 | 20 | 50,221,553 | 50,455,228 | 3 | 0 | 3 | 1 |
| Case 107 | 20 | 50,459,530 | 61,588,822 | 5 | 0 | 5 | 1 |
| Case 107 | 20 | 61,591,049 | 62,226,971 | 6 | 0 | 6 | 1 |
| Case 107 | 20 | 62,227,062 | 62,948,788 | 5 | 0 | 5 | 1 |
| Case 107 | 21 | 10,827,533 | 10,971,337 | 1 | 0 | 1 | 0 |
| Case 107 | 21 | 14,368,320 | 18,166,080 | 1 | 0 | 1 | 0 |
| Case 107 | 21 | 18,171,830 | 19,719,426 | 1 | 1 | 2 | 0 |
| Case 107 | 21 | 19,720,601 | 20,808,841 | 1 | 0 | 1 | 0 |
| Case 107 | 21 | 20,809,053 | 21,637,719 | 1 | 1 | 2 | 0 |
| Case 107 | 21 | 21,639,279 | 23,252,845 | 1 | 0 | 1 | 0 |

|          |    |             |             |   |   |   |   |
|----------|----|-------------|-------------|---|---|---|---|
| Case 107 | 21 | 23,254,055  | 25,022,446  | 1 | 1 | 2 | 0 |
| Case 107 | 21 | 25,025,157  | 28,717,815  | 1 | 0 | 1 | 0 |
| Case 107 | 21 | 28,721,847  | 30,271,099  | 1 | 1 | 2 | 0 |
| Case 107 | 21 | 30,274,205  | 30,927,772  | 1 | 0 | 1 | 0 |
| Case 107 | 21 | 30,931,631  | 33,729,530  | 1 | 1 | 2 | 0 |
| Case 107 | 21 | 33,735,605  | 34,166,479  | 1 | 0 | 1 | 0 |
| Case 107 | 21 | 34,166,480  | 34,516,762  | 1 | 1 | 2 | 0 |
| Case 107 | 21 | 34,518,330  | 35,202,591  | 1 | 0 | 1 | 0 |
| Case 107 | 21 | 35,206,880  | 38,390,130  | 1 | 1 | 2 | 0 |
| Case 107 | 21 | 38,390,173  | 38,905,245  | 1 | 0 | 1 | 0 |
| Case 107 | 21 | 38,906,782  | 40,489,027  | 1 | 1 | 2 | 0 |
| Case 107 | 21 | 40,490,396  | 40,926,633  | 1 | 0 | 1 | 0 |
| Case 107 | 21 | 40,928,536  | 48,100,155  | 1 | 1 | 2 | 0 |
| Case 107 | 22 | 16,114,244  | 41,223,206  | 2 | 0 | 2 | 1 |
| Case 107 | 22 | 41,223,211  | 41,913,844  | 1 | 0 | 1 | 0 |
| Case 107 | 22 | 41,919,330  | 41,924,556  | 1 | 1 | 2 | 0 |
| Case 107 | 22 | 41,924,573  | 46,448,819  | 2 | 0 | 2 | 1 |
| Case 107 | 22 | 46,454,208  | 46,752,829  | 1 | 0 | 1 | 0 |
| Case 107 | 22 | 46,753,179  | 46,795,723  | 1 | 1 | 2 | 0 |
| Case 107 | 22 | 46,795,742  | 51,195,728  | 2 | 0 | 2 | 1 |
| Case 108 | 1  | 82,154      | 17,228,131  | 3 | 0 | 3 | 1 |
| Case 108 | 1  | 17,248,532  | 17,266,464  | 2 | 0 | 2 | 1 |
| Case 108 | 1  | 17,270,614  | 35,454,473  | 3 | 0 | 3 | 1 |
| Case 108 | 1  | 35,454,498  | 35,871,036  | 2 | 0 | 2 | 1 |
| Case 108 | 1  | 35,873,611  | 40,921,238  | 3 | 0 | 3 | 1 |
| Case 108 | 1  | 40,922,062  | 40,961,449  | 2 | 0 | 2 | 1 |
| Case 108 | 1  | 40,961,562  | 51,826,853  | 3 | 0 | 3 | 1 |
| Case 108 | 1  | 51,826,921  | 52,221,995  | 2 | 0 | 2 | 1 |
| Case 108 | 1  | 52,222,016  | 52,631,292  | 3 | 0 | 3 | 1 |
| Case 108 | 1  | 52,636,517  | 52,732,490  | 2 | 0 | 2 | 1 |
| Case 108 | 1  | 52,734,221  | 52,897,395  | 3 | 0 | 3 | 1 |
| Case 108 | 1  | 52,901,119  | 53,045,440  | 2 | 0 | 2 | 1 |
| Case 108 | 1  | 53,050,461  | 62,666,518  | 3 | 0 | 3 | 1 |
| Case 108 | 1  | 62,672,381  | 62,675,539  | 2 | 0 | 2 | 1 |
| Case 108 | 1  | 62,675,667  | 70,671,201  | 3 | 0 | 3 | 1 |
| Case 108 | 1  | 70,675,693  | 70,744,507  | 2 | 0 | 2 | 1 |
| Case 108 | 1  | 70,750,558  | 70,986,547  | 1 | 0 | 1 | 0 |
| Case 108 | 1  | 70,990,002  | 70,993,695  | 2 | 1 | 3 | 0 |
| Case 108 | 1  | 70,995,562  | 92,358,371  | 3 | 0 | 3 | 1 |
| Case 108 | 1  | 92,359,242  | 92,882,554  | 2 | 0 | 2 | 1 |
| Case 108 | 1  | 92,885,523  | 96,566,226  | 3 | 0 | 3 | 1 |
| Case 108 | 1  | 96,578,814  | 98,948,007  | 2 | 2 | 4 | 0 |
| Case 108 | 1  | 98,952,064  | 103,467,615 | 3 | 0 | 3 | 1 |
| Case 108 | 1  | 103,468,332 | 103,548,505 | 2 | 0 | 2 | 1 |
| Case 108 | 1  | 103,551,498 | 111,276,629 | 3 | 0 | 3 | 1 |
| Case 108 | 1  | 111,288,171 | 111,322,647 | 5 | 1 | 6 | 0 |
| Case 108 | 1  | 111,324,727 | 112,019,467 | 6 | 1 | 7 | 0 |
| Case 108 | 1  | 112,020,320 | 112,045,709 | 5 | 1 | 6 | 0 |
| Case 108 | 1  | 112,045,734 | 112,153,539 | 6 | 1 | 7 | 0 |
| Case 108 | 1  | 112,156,965 | 112,156,965 | 2 | 0 | 2 | 1 |
| Case 108 | 1  | 112,161,635 | 113,460,049 | 3 | 0 | 3 | 1 |
| Case 108 | 1  | 113,460,055 | 113,497,629 | 2 | 0 | 2 | 1 |
| Case 108 | 1  | 113,502,552 | 114,539,586 | 3 | 0 | 3 | 1 |
| Case 108 | 1  | 114,541,498 | 119,104,373 | 2 | 2 | 4 | 0 |
| Case 108 | 1  | 119,106,612 | 119,253,426 | 6 | 1 | 7 | 0 |
| Case 108 | 1  | 119,255,045 | 119,555,759 | 5 | 1 | 6 | 0 |
| Case 108 | 1  | 119,562,382 | 120,415,364 | 6 | 1 | 7 | 0 |
| Case 108 | 1  | 120,418,844 | 120,471,739 | 5 | 1 | 6 | 0 |
| Case 108 | 1  | 120,478,125 | 121,346,616 | 2 | 1 | 3 | 0 |
| Case 108 | 1  | 142,649,718 | 145,533,451 | 2 | 1 | 3 | 0 |
| Case 108 | 1  | 145,533,551 | 150,371,394 | 2 | 2 | 4 | 0 |

|          |   |             |             |   |   |   |   |
|----------|---|-------------|-------------|---|---|---|---|
| Case 108 | 1 | 150,388,318 | 150,471,443 | 2 | 1 | 3 | 0 |
| Case 108 | 1 | 150,478,134 | 151,023,674 | 2 | 2 | 4 | 0 |
| Case 108 | 1 | 151,028,154 | 151,173,113 | 2 | 1 | 3 | 0 |
| Case 108 | 1 | 151,174,772 | 196,712,594 | 2 | 2 | 4 | 0 |
| Case 108 | 1 | 196,712,596 | 196,771,125 | 3 | 0 | 3 | 1 |
| Case 108 | 1 | 196,801,025 | 196,892,322 | 2 | 0 | 2 | 1 |
| Case 108 | 1 | 196,901,753 | 196,920,123 | 3 | 0 | 3 | 1 |
| Case 108 | 1 | 196,922,860 | 235,338,600 | 2 | 2 | 4 | 0 |
| Case 108 | 1 | 235,338,618 | 235,756,737 | 2 | 1 | 3 | 0 |
| Case 108 | 1 | 235,756,821 | 246,887,744 | 2 | 2 | 4 | 0 |
| Case 108 | 1 | 246,888,053 | 246,923,861 | 2 | 1 | 3 | 0 |
| Case 108 | 1 | 246,928,540 | 246,988,179 | 2 | 2 | 4 | 0 |
| Case 108 | 1 | 246,992,698 | 247,151,487 | 2 | 1 | 3 | 0 |
| Case 108 | 1 | 247,151,557 | 249,218,992 | 2 | 2 | 4 | 0 |
| Case 108 | 2 | 18,674      | 18,674      | 5 | 1 | 6 | 0 |
| Case 108 | 2 | 18,856      | 224,919     | 6 | 1 | 7 | 0 |
| Case 108 | 2 | 226,933     | 4,173,729   | 5 | 1 | 6 | 0 |
| Case 108 | 2 | 4,176,692   | 4,952,078   | 6 | 1 | 7 | 0 |
| Case 108 | 2 | 4,957,189   | 5,001,482   | 5 | 1 | 6 | 0 |
| Case 108 | 2 | 5,173,840   | 8,048,559   | 2 | 1 | 3 | 0 |
| Case 108 | 2 | 8,050,508   | 8,707,888   | 2 | 2 | 4 | 0 |
| Case 108 | 2 | 8,712,608   | 10,969,328  | 2 | 1 | 3 | 0 |
| Case 108 | 2 | 10,970,124  | 11,273,626  | 2 | 2 | 4 | 0 |
| Case 108 | 2 | 11,273,757  | 13,133,155  | 2 | 1 | 3 | 0 |
| Case 108 | 2 | 13,134,803  | 13,366,874  | 2 | 2 | 4 | 0 |
| Case 108 | 2 | 13,368,225  | 14,361,100  | 2 | 1 | 3 | 0 |
| Case 108 | 2 | 14,361,674  | 14,971,042  | 2 | 2 | 4 | 0 |
| Case 108 | 2 | 14,974,431  | 16,740,728  | 2 | 1 | 3 | 0 |
| Case 108 | 2 | 16,741,442  | 17,453,968  | 2 | 2 | 4 | 0 |
| Case 108 | 2 | 17,463,198  | 19,394,782  | 2 | 1 | 3 | 0 |
| Case 108 | 2 | 19,400,895  | 20,084,133  | 2 | 2 | 4 | 0 |
| Case 108 | 2 | 20,084,387  | 20,253,754  | 2 | 1 | 3 | 0 |
| Case 108 | 2 | 20,256,192  | 20,402,626  | 2 | 2 | 4 | 0 |
| Case 108 | 2 | 20,402,890  | 20,704,614  | 2 | 1 | 3 | 0 |
| Case 108 | 2 | 20,705,910  | 20,897,345  | 2 | 2 | 4 | 0 |
| Case 108 | 2 | 20,897,536  | 23,218,255  | 2 | 1 | 3 | 0 |
| Case 108 | 2 | 23,223,292  | 23,382,331  | 2 | 2 | 4 | 0 |
| Case 108 | 2 | 23,383,825  | 23,546,661  | 2 | 1 | 3 | 0 |
| Case 108 | 2 | 23,548,614  | 23,898,317  | 2 | 2 | 4 | 0 |
| Case 108 | 2 | 23,898,966  | 28,542,345  | 2 | 1 | 3 | 0 |
| Case 108 | 2 | 28,545,109  | 28,587,020  | 2 | 2 | 4 | 0 |
| Case 108 | 2 | 28,587,051  | 41,623,189  | 2 | 1 | 3 | 0 |
| Case 108 | 2 | 41,630,684  | 42,038,874  | 2 | 2 | 4 | 0 |
| Case 108 | 2 | 42,041,338  | 45,343,740  | 2 | 1 | 3 | 0 |
| Case 108 | 2 | 45,346,666  | 45,530,632  | 2 | 2 | 4 | 0 |
| Case 108 | 2 | 45,532,011  | 47,011,834  | 2 | 1 | 3 | 0 |
| Case 108 | 2 | 47,012,594  | 47,278,990  | 2 | 2 | 4 | 0 |
| Case 108 | 2 | 47,279,605  | 52,202,951  | 2 | 1 | 3 | 0 |
| Case 108 | 2 | 52,215,641  | 52,264,332  | 2 | 2 | 4 | 0 |
| Case 108 | 2 | 52,265,663  | 60,064,501  | 2 | 1 | 3 | 0 |
| Case 108 | 2 | 60,068,526  | 60,294,601  | 2 | 2 | 4 | 0 |
| Case 108 | 2 | 60,295,277  | 66,060,863  | 2 | 1 | 3 | 0 |
| Case 108 | 2 | 66,062,059  | 66,149,357  | 2 | 2 | 4 | 0 |
| Case 108 | 2 | 66,149,484  | 71,897,075  | 2 | 1 | 3 | 0 |
| Case 108 | 2 | 71,899,180  | 72,161,465  | 2 | 2 | 4 | 0 |
| Case 108 | 2 | 72,164,293  | 73,868,736  | 2 | 1 | 3 | 0 |
| Case 108 | 2 | 73,869,666  | 73,932,044  | 2 | 2 | 4 | 0 |
| Case 108 | 2 | 73,937,901  | 75,268,803  | 2 | 1 | 3 | 0 |
| Case 108 | 2 | 75,269,064  | 75,541,353  | 2 | 2 | 4 | 0 |
| Case 108 | 2 | 75,546,653  | 92,081,640  | 2 | 1 | 3 | 0 |
| Case 108 | 2 | 95,429,424  | 141,340,626 | 2 | 1 | 3 | 0 |

|          |   |             |             |   |   |   |   |
|----------|---|-------------|-------------|---|---|---|---|
| Case 108 | 2 | 141,343,100 | 141,350,100 | 1 | 0 | 1 | 0 |
| Case 108 | 2 | 141,354,396 | 145,640,663 | 2 | 1 | 3 | 0 |
| Case 108 | 2 | 145,646,072 | 145,684,278 | 1 | 0 | 1 | 0 |
| Case 108 | 2 | 145,702,147 | 154,574,231 | 2 | 1 | 3 | 0 |
| Case 108 | 2 | 154,582,564 | 154,783,869 | 1 | 1 | 2 | 0 |
| Case 108 | 2 | 154,800,999 | 155,038,788 | 2 | 1 | 3 | 0 |
| Case 108 | 2 | 155,053,140 | 155,605,737 | 2 | 0 | 2 | 1 |
| Case 108 | 2 | 155,606,965 | 155,647,666 | 1 | 0 | 1 | 0 |
| Case 108 | 2 | 155,647,819 | 155,647,819 | 2 | 1 | 3 | 0 |
| Case 108 | 2 | 155,648,521 | 155,648,521 | 1 | 0 | 1 | 0 |
| Case 108 | 2 | 155,649,338 | 155,668,615 | 1 | 1 | 2 | 0 |
| Case 108 | 2 | 155,682,556 | 156,003,177 | 1 | 0 | 1 | 0 |
| Case 108 | 2 | 156,011,900 | 183,346,071 | 2 | 1 | 3 | 0 |
| Case 108 | 2 | 183,347,174 | 183,582,868 | 2 | 0 | 2 | 1 |
| Case 108 | 2 | 183,584,755 | 183,666,932 | 3 | 0 | 3 | 1 |
| Case 108 | 2 | 183,667,233 | 184,613,551 | 2 | 1 | 3 | 0 |
| Case 108 | 2 | 184,614,354 | 185,210,610 | 2 | 0 | 2 | 1 |
| Case 108 | 2 | 185,212,246 | 185,212,246 | 1 | 0 | 1 | 0 |
| Case 108 | 2 | 185,217,338 | 203,738,181 | 2 | 1 | 3 | 0 |
| Case 108 | 2 | 203,740,672 | 204,101,328 | 1 | 1 | 2 | 0 |
| Case 108 | 2 | 204,105,996 | 243,048,760 | 2 | 1 | 3 | 0 |
| Case 108 | 3 | 61,495      | 8,323,456   | 3 | 0 | 3 | 1 |
| Case 108 | 3 | 8,323,828   | 8,851,872   | 4 | 0 | 4 | 1 |
| Case 108 | 3 | 8,854,136   | 8,995,186   | 3 | 0 | 3 | 1 |
| Case 108 | 3 | 8,996,747   | 9,266,056   | 4 | 0 | 4 | 1 |
| Case 108 | 3 | 9,271,859   | 10,443,090  | 3 | 0 | 3 | 1 |
| Case 108 | 3 | 10,446,826  | 11,092,264  | 4 | 0 | 4 | 1 |
| Case 108 | 3 | 11,092,828  | 12,803,792  | 3 | 0 | 3 | 1 |
| Case 108 | 3 | 12,805,910  | 13,425,416  | 4 | 0 | 4 | 1 |
| Case 108 | 3 | 13,426,610  | 13,478,434  | 3 | 0 | 3 | 1 |
| Case 108 | 3 | 13,480,595  | 14,519,102  | 4 | 0 | 4 | 1 |
| Case 108 | 3 | 14,520,036  | 16,639,754  | 3 | 0 | 3 | 1 |
| Case 108 | 3 | 16,640,068  | 16,926,699  | 4 | 0 | 4 | 1 |
| Case 108 | 3 | 16,929,088  | 24,197,273  | 3 | 0 | 3 | 1 |
| Case 108 | 3 | 24,198,726  | 24,290,280  | 4 | 0 | 4 | 1 |
| Case 108 | 3 | 24,292,825  | 24,928,351  | 3 | 0 | 3 | 1 |
| Case 108 | 3 | 24,930,256  | 25,275,474  | 4 | 0 | 4 | 1 |
| Case 108 | 3 | 25,290,005  | 26,874,626  | 3 | 0 | 3 | 1 |
| Case 108 | 3 | 26,877,202  | 27,152,266  | 4 | 0 | 4 | 1 |
| Case 108 | 3 | 27,161,663  | 27,937,774  | 3 | 0 | 3 | 1 |
| Case 108 | 3 | 27,938,455  | 28,132,490  | 4 | 0 | 4 | 1 |
| Case 108 | 3 | 28,137,183  | 30,118,503  | 3 | 0 | 3 | 1 |
| Case 108 | 3 | 30,118,718  | 30,594,168  | 4 | 0 | 4 | 1 |
| Case 108 | 3 | 30,594,586  | 30,729,636  | 3 | 0 | 3 | 1 |
| Case 108 | 3 | 30,730,239  | 30,825,421  | 4 | 0 | 4 | 1 |
| Case 108 | 3 | 30,827,898  | 31,106,139  | 3 | 0 | 3 | 1 |
| Case 108 | 3 | 31,110,187  | 31,285,081  | 4 | 0 | 4 | 1 |
| Case 108 | 3 | 31,288,543  | 38,574,968  | 3 | 0 | 3 | 1 |
| Case 108 | 3 | 38,575,751  | 38,730,117  | 4 | 0 | 4 | 1 |
| Case 108 | 3 | 38,736,230  | 40,771,143  | 3 | 0 | 3 | 1 |
| Case 108 | 3 | 40,786,674  | 41,169,335  | 4 | 0 | 4 | 1 |
| Case 108 | 3 | 41,177,604  | 52,522,218  | 3 | 0 | 3 | 1 |
| Case 108 | 3 | 52,522,297  | 52,550,569  | 4 | 0 | 4 | 1 |
| Case 108 | 3 | 52,550,590  | 59,253,941  | 3 | 0 | 3 | 1 |
| Case 108 | 3 | 59,259,043  | 59,631,424  | 4 | 0 | 4 | 1 |
| Case 108 | 3 | 59,635,215  | 60,860,868  | 3 | 0 | 3 | 1 |
| Case 108 | 3 | 60,871,882  | 60,871,882  | 2 | 0 | 2 | 1 |
| Case 108 | 3 | 60,874,077  | 61,239,571  | 0 | 0 | 0 | 0 |
| Case 108 | 3 | 61,241,178  | 61,241,178  | 2 | 0 | 2 | 1 |
| Case 108 | 3 | 61,253,045  | 64,673,815  | 3 | 0 | 3 | 1 |
| Case 108 | 3 | 64,674,346  | 64,792,082  | 4 | 0 | 4 | 1 |

|          |   |             |             |   |   |   |   |
|----------|---|-------------|-------------|---|---|---|---|
| Case 108 | 3 | 64,793,581  | 84,585,678  | 3 | 0 | 3 | 1 |
| Case 108 | 3 | 84,623,711  | 90,442,925  | 3 | 1 | 4 | 0 |
| Case 108 | 3 | 93,537,290  | 99,015,616  | 3 | 0 | 3 | 1 |
| Case 108 | 3 | 99,031,898  | 103,468,070 | 3 | 1 | 4 | 0 |
| Case 108 | 3 | 103,470,236 | 103,487,522 | 2 | 2 | 4 | 0 |
| Case 108 | 3 | 103,492,587 | 104,396,611 | 3 | 2 | 5 | 0 |
| Case 108 | 3 | 104,404,772 | 160,941,318 | 3 | 1 | 4 | 0 |
| Case 108 | 3 | 160,946,769 | 161,102,097 | 2 | 2 | 4 | 0 |
| Case 108 | 3 | 161,102,127 | 162,373,246 | 3 | 2 | 5 | 0 |
| Case 108 | 3 | 162,376,870 | 162,992,009 | 2 | 2 | 4 | 0 |
| Case 108 | 3 | 162,997,262 | 164,807,679 | 3 | 2 | 5 | 0 |
| Case 108 | 3 | 164,854,410 | 164,854,410 | 3 | 0 | 3 | 1 |
| Case 108 | 3 | 164,871,580 | 174,980,714 | 3 | 1 | 4 | 0 |
| Case 108 | 3 | 174,985,106 | 174,996,509 | 2 | 2 | 4 | 0 |
| Case 108 | 3 | 175,001,029 | 175,211,606 | 2 | 1 | 3 | 0 |
| Case 108 | 3 | 175,215,959 | 175,497,466 | 2 | 2 | 4 | 0 |
| Case 108 | 3 | 175,507,453 | 176,691,296 | 3 | 2 | 5 | 0 |
| Case 108 | 3 | 176,695,772 | 176,695,772 | 3 | 0 | 3 | 1 |
| Case 108 | 3 | 176,703,201 | 197,670,651 | 3 | 1 | 4 | 0 |
| Case 108 | 3 | 197,670,652 | 197,766,946 | 2 | 2 | 4 | 0 |
| Case 108 | 3 | 197,775,758 | 197,838,262 | 6 | 1 | 7 | 0 |
| Case 108 | 4 | 71,566      | 333,310     | 3 | 0 | 3 | 1 |
| Case 108 | 4 | 337,587     | 438,080     | 2 | 0 | 2 | 1 |
| Case 108 | 4 | 442,021     | 2,209,899   | 3 | 0 | 3 | 1 |
| Case 108 | 4 | 2,209,922   | 2,240,734   | 2 | 0 | 2 | 1 |
| Case 108 | 4 | 2,242,247   | 40,104,609  | 3 | 0 | 3 | 1 |
| Case 108 | 4 | 40,104,646  | 40,158,464  | 2 | 0 | 2 | 1 |
| Case 108 | 4 | 40,162,971  | 49,620,898  | 3 | 0 | 3 | 1 |
| Case 108 | 4 | 52,697,856  | 58,412,269  | 3 | 0 | 3 | 1 |
| Case 108 | 4 | 58,412,380  | 58,655,901  | 2 | 0 | 2 | 1 |
| Case 108 | 4 | 58,662,041  | 59,304,973  | 3 | 0 | 3 | 1 |
| Case 108 | 4 | 59,319,223  | 60,268,638  | 2 | 0 | 2 | 1 |
| Case 108 | 4 | 60,275,069  | 61,866,264  | 3 | 0 | 3 | 1 |
| Case 108 | 4 | 61,871,415  | 63,084,429  | 2 | 0 | 2 | 1 |
| Case 108 | 4 | 63,096,403  | 64,625,606  | 3 | 0 | 3 | 1 |
| Case 108 | 4 | 64,662,510  | 73,205,243  | 4 | 0 | 4 | 1 |
| Case 108 | 4 | 73,245,191  | 73,854,103  | 5 | 0 | 5 | 1 |
| Case 108 | 4 | 73,854,191  | 73,854,191  | 2 | 0 | 2 | 1 |
| Case 108 | 4 | 73,854,746  | 76,264,496  | 4 | 0 | 4 | 1 |
| Case 108 | 4 | 76,268,697  | 77,102,168  | 3 | 0 | 3 | 1 |
| Case 108 | 4 | 77,102,169  | 83,218,230  | 4 | 0 | 4 | 1 |
| Case 108 | 4 | 83,237,661  | 83,610,429  | 3 | 0 | 3 | 1 |
| Case 108 | 4 | 83,613,357  | 83,659,974  | 4 | 0 | 4 | 1 |
| Case 108 | 4 | 83,660,842  | 84,400,120  | 3 | 0 | 3 | 1 |
| Case 108 | 4 | 84,408,013  | 84,870,572  | 4 | 0 | 4 | 1 |
| Case 108 | 4 | 84,879,860  | 85,654,590  | 5 | 0 | 5 | 1 |
| Case 108 | 4 | 85,661,400  | 90,170,625  | 2 | 0 | 2 | 1 |
| Case 108 | 4 | 90,170,669  | 90,372,566  | 3 | 0 | 3 | 1 |
| Case 108 | 4 | 90,372,847  | 94,725,853  | 2 | 0 | 2 | 1 |
| Case 108 | 4 | 94,727,622  | 94,775,266  | 3 | 0 | 3 | 1 |
| Case 108 | 4 | 94,777,861  | 119,896,186 | 2 | 0 | 2 | 1 |
| Case 108 | 4 | 119,896,331 | 119,956,411 | 3 | 0 | 3 | 1 |
| Case 108 | 4 | 119,962,741 | 152,567,239 | 2 | 0 | 2 | 1 |
| Case 108 | 4 | 152,568,478 | 152,818,704 | 3 | 0 | 3 | 1 |
| Case 108 | 4 | 152,825,600 | 153,895,836 | 2 | 0 | 2 | 1 |
| Case 108 | 4 | 153,895,839 | 154,017,964 | 3 | 0 | 3 | 1 |
| Case 108 | 4 | 154,020,068 | 154,667,382 | 2 | 0 | 2 | 1 |
| Case 108 | 4 | 154,669,846 | 154,864,750 | 3 | 0 | 3 | 1 |
| Case 108 | 4 | 154,867,538 | 155,777,864 | 2 | 0 | 2 | 1 |
| Case 108 | 4 | 155,778,844 | 155,833,011 | 3 | 0 | 3 | 1 |
| Case 108 | 4 | 155,835,510 | 184,902,533 | 2 | 0 | 2 | 1 |

|          |   |             |             |   |   |   |   |
|----------|---|-------------|-------------|---|---|---|---|
| Case 108 | 4 | 184,905,482 | 185,215,134 | 3 | 0 | 3 | 1 |
| Case 108 | 4 | 185,217,303 | 185,323,726 | 2 | 0 | 2 | 1 |
| Case 108 | 4 | 185,324,939 | 185,436,378 | 3 | 0 | 3 | 1 |
| Case 108 | 4 | 185,440,669 | 185,870,383 | 2 | 0 | 2 | 1 |
| Case 108 | 4 | 185,872,178 | 185,940,205 | 3 | 0 | 3 | 1 |
| Case 108 | 4 | 185,940,785 | 187,394,590 | 2 | 0 | 2 | 1 |
| Case 108 | 4 | 187,403,169 | 187,524,714 | 3 | 0 | 3 | 1 |
| Case 108 | 4 | 187,524,923 | 187,614,434 | 2 | 0 | 2 | 1 |
| Case 108 | 4 | 187,621,281 | 187,630,597 | 3 | 0 | 3 | 1 |
| Case 108 | 4 | 187,630,813 | 190,963,766 | 2 | 0 | 2 | 1 |
| Case 108 | 5 | 38,139      | 195,323     | 2 | 2 | 4 | 0 |
| Case 108 | 5 | 200,868     | 964,250     | 2 | 1 | 3 | 0 |
| Case 108 | 5 | 965,618     | 1,212,357   | 2 | 2 | 4 | 0 |
| Case 108 | 5 | 1,212,445   | 1,243,873   | 2 | 1 | 3 | 0 |
| Case 108 | 5 | 1,244,330   | 1,594,995   | 2 | 2 | 4 | 0 |
| Case 108 | 5 | 1,612,612   | 1,850,563   | 2 | 1 | 3 | 0 |
| Case 108 | 5 | 1,852,284   | 2,509,474   | 2 | 2 | 4 | 0 |
| Case 108 | 5 | 2,513,346   | 2,543,192   | 2 | 1 | 3 | 0 |
| Case 108 | 5 | 2,544,880   | 2,970,320   | 2 | 2 | 4 | 0 |
| Case 108 | 5 | 2,972,677   | 3,095,939   | 2 | 1 | 3 | 0 |
| Case 108 | 5 | 3,096,001   | 3,134,879   | 2 | 2 | 4 | 0 |
| Case 108 | 5 | 3,138,553   | 3,579,516   | 2 | 1 | 3 | 0 |
| Case 108 | 5 | 3,580,400   | 4,281,622   | 2 | 2 | 4 | 0 |
| Case 108 | 5 | 4,281,719   | 5,121,337   | 2 | 1 | 3 | 0 |
| Case 108 | 5 | 5,123,214   | 5,202,232   | 2 | 2 | 4 | 0 |
| Case 108 | 5 | 5,202,753   | 5,798,853   | 2 | 1 | 3 | 0 |
| Case 108 | 5 | 5,800,497   | 5,916,224   | 2 | 2 | 4 | 0 |
| Case 108 | 5 | 5,916,337   | 6,547,317   | 2 | 1 | 3 | 0 |
| Case 108 | 5 | 6,548,889   | 6,613,827   | 2 | 2 | 4 | 0 |
| Case 108 | 5 | 6,616,277   | 9,610,282   | 2 | 1 | 3 | 0 |
| Case 108 | 5 | 9,616,496   | 10,152,686  | 2 | 2 | 4 | 0 |
| Case 108 | 5 | 10,158,297  | 27,577,544  | 2 | 1 | 3 | 0 |
| Case 108 | 5 | 27,583,734  | 27,748,053  | 2 | 2 | 4 | 0 |
| Case 108 | 5 | 27,769,954  | 31,075,755  | 2 | 1 | 3 | 0 |
| Case 108 | 5 | 31,076,540  | 31,284,709  | 2 | 2 | 4 | 0 |
| Case 108 | 5 | 31,285,782  | 32,843,434  | 2 | 1 | 3 | 0 |
| Case 108 | 5 | 32,843,583  | 33,011,986  | 2 | 2 | 4 | 0 |
| Case 108 | 5 | 33,017,254  | 38,716,873  | 2 | 1 | 3 | 0 |
| Case 108 | 5 | 38,722,734  | 38,756,294  | 5 | 1 | 6 | 0 |
| Case 108 | 5 | 38,757,335  | 38,917,574  | 6 | 1 | 7 | 0 |
| Case 108 | 5 | 38,917,669  | 38,933,645  | 5 | 1 | 6 | 0 |
| Case 108 | 5 | 38,933,749  | 39,124,016  | 6 | 1 | 7 | 0 |
| Case 108 | 5 | 39,126,145  | 40,096,079  | 5 | 1 | 6 | 0 |
| Case 108 | 5 | 40,096,156  | 40,258,578  | 6 | 1 | 7 | 0 |
| Case 108 | 5 | 40,267,930  | 44,051,305  | 5 | 1 | 6 | 0 |
| Case 108 | 5 | 44,059,937  | 44,800,665  | 6 | 1 | 7 | 0 |
| Case 108 | 5 | 44,809,066  | 44,809,408  | 2 | 2 | 4 | 0 |
| Case 108 | 5 | 44,809,548  | 46,399,093  | 6 | 1 | 7 | 0 |
| Case 108 | 5 | 49,457,282  | 51,070,843  | 2 | 0 | 2 | 1 |
| Case 108 | 5 | 51,092,307  | 53,970,118  | 6 | 1 | 7 | 0 |
| Case 108 | 5 | 53,975,846  | 54,674,296  | 5 | 1 | 6 | 0 |
| Case 108 | 5 | 54,674,967  | 55,738,764  | 2 | 0 | 2 | 1 |
| Case 108 | 5 | 55,740,340  | 55,988,778  | 3 | 0 | 3 | 1 |
| Case 108 | 5 | 55,990,143  | 56,777,481  | 2 | 0 | 2 | 1 |
| Case 108 | 5 | 56,777,508  | 56,785,096  | 3 | 0 | 3 | 1 |
| Case 108 | 5 | 56,789,327  | 60,822,115  | 2 | 0 | 2 | 1 |
| Case 108 | 5 | 60,825,947  | 60,999,768  | 3 | 0 | 3 | 1 |
| Case 108 | 5 | 60,999,831  | 61,071,912  | 2 | 0 | 2 | 1 |
| Case 108 | 5 | 61,080,390  | 61,312,387  | 3 | 0 | 3 | 1 |
| Case 108 | 5 | 61,338,462  | 65,609,661  | 2 | 0 | 2 | 1 |
| Case 108 | 5 | 65,614,238  | 65,662,570  | 3 | 0 | 3 | 1 |

|          |   |             |             |   |   |   |   |
|----------|---|-------------|-------------|---|---|---|---|
| Case 108 | 5 | 65,665,913  | 67,728,508  | 2 | 0 | 2 | 1 |
| Case 108 | 5 | 67,729,637  | 67,776,535  | 3 | 0 | 3 | 1 |
| Case 108 | 5 | 67,777,856  | 71,260,614  | 2 | 0 | 2 | 1 |
| Case 108 | 5 | 71,260,673  | 71,437,262  | 3 | 0 | 3 | 1 |
| Case 108 | 5 | 71,441,589  | 72,408,246  | 2 | 0 | 2 | 1 |
| Case 108 | 5 | 72,408,589  | 72,690,460  | 3 | 0 | 3 | 1 |
| Case 108 | 5 | 72,698,328  | 73,452,467  | 2 | 0 | 2 | 1 |
| Case 108 | 5 | 73,455,955  | 73,569,263  | 3 | 0 | 3 | 1 |
| Case 108 | 5 | 73,575,358  | 95,728,710  | 2 | 0 | 2 | 1 |
| Case 108 | 5 | 95,728,863  | 95,842,987  | 3 | 0 | 3 | 1 |
| Case 108 | 5 | 95,844,921  | 107,877,657 | 2 | 0 | 2 | 1 |
| Case 108 | 5 | 107,881,274 | 111,814,948 | 3 | 0 | 3 | 1 |
| Case 108 | 5 | 111,815,721 | 115,696,118 | 2 | 0 | 2 | 1 |
| Case 108 | 5 | 115,698,959 | 115,795,188 | 3 | 0 | 3 | 1 |
| Case 108 | 5 | 115,796,103 | 121,487,918 | 2 | 0 | 2 | 1 |
| Case 108 | 5 | 121,487,954 | 121,489,122 | 3 | 0 | 3 | 1 |
| Case 108 | 5 | 121,492,603 | 123,587,152 | 2 | 0 | 2 | 1 |
| Case 108 | 5 | 123,587,452 | 123,736,406 | 3 | 0 | 3 | 1 |
| Case 108 | 5 | 123,737,922 | 126,699,347 | 2 | 0 | 2 | 1 |
| Case 108 | 5 | 126,701,190 | 126,798,031 | 3 | 0 | 3 | 1 |
| Case 108 | 5 | 126,805,804 | 127,260,499 | 2 | 0 | 2 | 1 |
| Case 108 | 5 | 127,266,725 | 127,450,346 | 4 | 0 | 4 | 1 |
| Case 108 | 5 | 127,468,177 | 131,312,327 | 2 | 0 | 2 | 1 |
| Case 108 | 5 | 131,312,380 | 131,436,896 | 3 | 0 | 3 | 1 |
| Case 108 | 5 | 131,447,104 | 131,530,411 | 2 | 0 | 2 | 1 |
| Case 108 | 5 | 131,533,444 | 131,653,925 | 3 | 0 | 3 | 1 |
| Case 108 | 5 | 131,656,517 | 131,986,463 | 2 | 0 | 2 | 1 |
| Case 108 | 5 | 131,992,409 | 132,001,386 | 3 | 0 | 3 | 1 |
| Case 108 | 5 | 132,008,016 | 132,535,046 | 2 | 0 | 2 | 1 |
| Case 108 | 5 | 132,535,191 | 132,742,865 | 3 | 0 | 3 | 1 |
| Case 108 | 5 | 132,744,119 | 132,761,691 | 2 | 0 | 2 | 1 |
| Case 108 | 5 | 132,765,214 | 133,224,404 | 3 | 0 | 3 | 1 |
| Case 108 | 5 | 133,226,649 | 133,823,078 | 2 | 0 | 2 | 1 |
| Case 108 | 5 | 133,826,527 | 133,930,528 | 3 | 0 | 3 | 1 |
| Case 108 | 5 | 133,942,478 | 134,305,197 | 2 | 0 | 2 | 1 |
| Case 108 | 5 | 134,305,646 | 134,644,855 | 3 | 0 | 3 | 1 |
| Case 108 | 5 | 134,652,489 | 134,768,821 | 2 | 0 | 2 | 1 |
| Case 108 | 5 | 134,769,827 | 135,259,846 | 3 | 0 | 3 | 1 |
| Case 108 | 5 | 135,261,332 | 135,310,491 | 2 | 0 | 2 | 1 |
| Case 108 | 5 | 135,311,863 | 135,424,352 | 3 | 0 | 3 | 1 |
| Case 108 | 5 | 135,426,282 | 135,587,402 | 2 | 0 | 2 | 1 |
| Case 108 | 5 | 135,589,692 | 135,758,057 | 3 | 0 | 3 | 1 |
| Case 108 | 5 | 135,762,742 | 136,435,483 | 2 | 0 | 2 | 1 |
| Case 108 | 5 | 136,439,139 | 136,613,156 | 3 | 0 | 3 | 1 |
| Case 108 | 5 | 136,614,606 | 136,832,279 | 2 | 0 | 2 | 1 |
| Case 108 | 5 | 136,834,138 | 136,934,484 | 4 | 0 | 4 | 1 |
| Case 108 | 5 | 136,940,216 | 138,992,703 | 3 | 0 | 3 | 1 |
| Case 108 | 5 | 139,026,616 | 139,276,664 | 4 | 0 | 4 | 1 |
| Case 108 | 5 | 139,276,748 | 139,931,620 | 2 | 0 | 2 | 1 |
| Case 108 | 5 | 139,931,629 | 139,931,653 | 0 | 0 | 0 | 0 |
| Case 108 | 5 | 139,931,655 | 140,718,552 | 2 | 0 | 2 | 1 |
| Case 108 | 5 | 140,718,566 | 140,751,698 | 3 | 0 | 3 | 1 |
| Case 108 | 5 | 140,752,104 | 140,797,630 | 2 | 0 | 2 | 1 |
| Case 108 | 5 | 140,797,827 | 140,895,377 | 3 | 0 | 3 | 1 |
| Case 108 | 5 | 140,899,268 | 141,026,812 | 2 | 0 | 2 | 1 |
| Case 108 | 5 | 141,026,884 | 141,337,145 | 3 | 0 | 3 | 1 |
| Case 108 | 5 | 141,337,176 | 142,817,607 | 2 | 0 | 2 | 1 |
| Case 108 | 5 | 142,818,306 | 142,917,007 | 3 | 0 | 3 | 1 |
| Case 108 | 5 | 142,922,087 | 148,178,371 | 2 | 0 | 2 | 1 |
| Case 108 | 5 | 148,179,160 | 148,261,996 | 3 | 0 | 3 | 1 |
| Case 108 | 5 | 148,267,406 | 148,431,804 | 2 | 0 | 2 | 1 |

|          |   |             |             |   |   |   |   |
|----------|---|-------------|-------------|---|---|---|---|
| Case 108 | 5 | 148,431,964 | 148,695,825 | 3 | 0 | 3 | 1 |
| Case 108 | 5 | 148,695,827 | 148,752,968 | 2 | 0 | 2 | 1 |
| Case 108 | 5 | 148,753,999 | 148,846,557 | 3 | 0 | 3 | 1 |
| Case 108 | 5 | 148,851,149 | 149,003,627 | 2 | 0 | 2 | 1 |
| Case 108 | 5 | 149,004,827 | 149,061,981 | 3 | 0 | 3 | 1 |
| Case 108 | 5 | 149,064,858 | 149,119,815 | 2 | 0 | 2 | 1 |
| Case 108 | 5 | 149,124,228 | 149,251,539 | 3 | 0 | 3 | 1 |
| Case 108 | 5 | 149,253,914 | 149,435,759 | 2 | 0 | 2 | 1 |
| Case 108 | 5 | 149,436,930 | 149,596,241 | 3 | 0 | 3 | 1 |
| Case 108 | 5 | 149,596,955 | 150,376,966 | 2 | 0 | 2 | 1 |
| Case 108 | 5 | 150,381,243 | 150,498,929 | 3 | 0 | 3 | 1 |
| Case 108 | 5 | 150,498,939 | 150,518,321 | 2 | 0 | 2 | 1 |
| Case 108 | 5 | 150,518,532 | 150,565,008 | 3 | 0 | 3 | 1 |
| Case 108 | 5 | 150,565,724 | 150,810,733 | 2 | 0 | 2 | 1 |
| Case 108 | 5 | 150,820,233 | 150,901,242 | 3 | 0 | 3 | 1 |
| Case 108 | 5 | 150,901,261 | 150,945,261 | 2 | 0 | 2 | 1 |
| Case 108 | 5 | 150,945,465 | 150,948,290 | 3 | 0 | 3 | 1 |
| Case 108 | 5 | 150,951,581 | 153,674,032 | 2 | 0 | 2 | 1 |
| Case 108 | 5 | 153,674,472 | 153,767,845 | 3 | 0 | 3 | 1 |
| Case 108 | 5 | 153,768,664 | 154,160,742 | 2 | 0 | 2 | 1 |
| Case 108 | 5 | 154,169,933 | 154,203,264 | 3 | 0 | 3 | 1 |
| Case 108 | 5 | 154,205,452 | 154,750,384 | 2 | 0 | 2 | 1 |
| Case 108 | 5 | 154,757,969 | 154,975,163 | 3 | 0 | 3 | 1 |
| Case 108 | 5 | 154,975,827 | 158,743,719 | 2 | 0 | 2 | 1 |
| Case 108 | 5 | 158,743,788 | 158,881,497 | 3 | 0 | 3 | 1 |
| Case 108 | 5 | 158,882,027 | 167,169,471 | 2 | 0 | 2 | 1 |
| Case 108 | 5 | 167,172,505 | 167,675,135 | 3 | 0 | 3 | 1 |
| Case 108 | 5 | 167,675,370 | 168,080,299 | 2 | 0 | 2 | 1 |
| Case 108 | 5 | 168,082,455 | 168,734,887 | 3 | 0 | 3 | 1 |
| Case 108 | 5 | 168,749,737 | 169,347,388 | 2 | 0 | 2 | 1 |
| Case 108 | 5 | 169,348,810 | 169,647,831 | 3 | 0 | 3 | 1 |
| Case 108 | 5 | 169,648,022 | 169,708,691 | 2 | 0 | 2 | 1 |
| Case 108 | 5 | 169,715,038 | 170,197,358 | 3 | 0 | 3 | 1 |
| Case 108 | 5 | 170,197,779 | 170,915,499 | 2 | 0 | 2 | 1 |
| Case 108 | 5 | 170,915,685 | 171,281,875 | 3 | 0 | 3 | 1 |
| Case 108 | 5 | 171,283,469 | 171,865,548 | 2 | 0 | 2 | 1 |
| Case 108 | 5 | 171,866,575 | 172,179,584 | 3 | 0 | 3 | 1 |
| Case 108 | 5 | 172,188,213 | 172,709,271 | 2 | 0 | 2 | 1 |
| Case 108 | 5 | 172,710,744 | 173,349,116 | 3 | 0 | 3 | 1 |
| Case 108 | 5 | 173,352,763 | 173,554,239 | 2 | 0 | 2 | 1 |
| Case 108 | 5 | 173,555,382 | 173,601,819 | 3 | 0 | 3 | 1 |
| Case 108 | 5 | 173,602,922 | 175,022,459 | 2 | 0 | 2 | 1 |
| Case 108 | 5 | 175,023,656 | 175,204,022 | 3 | 0 | 3 | 1 |
| Case 108 | 5 | 175,204,783 | 176,086,083 | 2 | 0 | 2 | 1 |
| Case 108 | 5 | 176,091,411 | 176,311,090 | 3 | 0 | 3 | 1 |
| Case 108 | 5 | 176,314,060 | 176,793,319 | 2 | 0 | 2 | 1 |
| Case 108 | 5 | 176,794,191 | 176,833,218 | 3 | 0 | 3 | 1 |
| Case 108 | 5 | 176,834,345 | 177,638,965 | 2 | 0 | 2 | 1 |
| Case 108 | 5 | 177,640,034 | 177,673,400 | 3 | 0 | 3 | 1 |
| Case 108 | 5 | 177,673,423 | 177,748,169 | 2 | 0 | 2 | 1 |
| Case 108 | 5 | 177,749,643 | 177,942,798 | 3 | 0 | 3 | 1 |
| Case 108 | 5 | 177,948,971 | 178,406,388 | 2 | 0 | 2 | 1 |
| Case 108 | 5 | 178,406,467 | 178,419,000 | 3 | 0 | 3 | 1 |
| Case 108 | 5 | 178,421,770 | 178,513,141 | 2 | 0 | 2 | 1 |
| Case 108 | 5 | 178,516,483 | 178,555,045 | 3 | 0 | 3 | 1 |
| Case 108 | 5 | 178,555,097 | 178,652,282 | 2 | 0 | 2 | 1 |
| Case 108 | 5 | 178,658,161 | 178,712,059 | 3 | 0 | 3 | 1 |
| Case 108 | 5 | 178,713,712 | 179,264,633 | 2 | 0 | 2 | 1 |
| Case 108 | 5 | 179,264,666 | 179,367,026 | 3 | 0 | 3 | 1 |
| Case 108 | 5 | 179,368,372 | 180,457,135 | 2 | 0 | 2 | 1 |
| Case 108 | 5 | 180,458,813 | 180,493,362 | 3 | 0 | 3 | 1 |



|          |   |             |             |   |   |   |   |
|----------|---|-------------|-------------|---|---|---|---|
| Case 108 | 5 | 180,493,946 | 180,693,127 | 2 | 0 | 2 | 1 |
| Case 108 | 6 | 108,666     | 6,819,029   | 2 | 2 | 4 | 0 |
| Case 108 | 6 | 6,823,042   | 7,156,901   | 3 | 0 | 3 | 1 |
| Case 108 | 6 | 7,166,238   | 17,226,021  | 2 | 2 | 4 | 0 |
| Case 108 | 6 | 17,226,085  | 17,871,852  | 2 | 1 | 3 | 0 |
| Case 108 | 6 | 17,873,622  | 26,184,041  | 2 | 2 | 4 | 0 |
| Case 108 | 6 | 26,184,617  | 26,287,256  | 3 | 0 | 3 | 1 |
| Case 108 | 6 | 26,289,435  | 27,376,695  | 3 | 1 | 4 | 0 |
| Case 108 | 6 | 27,376,910  | 27,879,289  | 3 | 0 | 3 | 1 |
| Case 108 | 6 | 27,879,395  | 28,616,327  | 2 | 2 | 4 | 0 |
| Case 108 | 6 | 28,620,197  | 28,784,031  | 2 | 1 | 3 | 0 |
| Case 108 | 6 | 28,784,106  | 30,671,634  | 2 | 2 | 4 | 0 |
| Case 108 | 6 | 30,671,650  | 30,682,856  | 2 | 1 | 3 | 0 |
| Case 108 | 6 | 30,684,471  | 30,874,165  | 2 | 2 | 4 | 0 |
| Case 108 | 6 | 30,874,308  | 30,882,513  | 2 | 1 | 3 | 0 |
| Case 108 | 6 | 30,882,634  | 31,021,860  | 2 | 2 | 4 | 0 |
| Case 108 | 6 | 31,022,113  | 31,033,509  | 2 | 1 | 3 | 0 |
| Case 108 | 6 | 31,034,173  | 31,208,340  | 2 | 2 | 4 | 0 |
| Case 108 | 6 | 31,208,610  | 31,243,884  | 2 | 1 | 3 | 0 |
| Case 108 | 6 | 31,244,021  | 35,715,362  | 2 | 2 | 4 | 0 |
| Case 108 | 6 | 35,715,420  | 36,076,169  | 2 | 1 | 3 | 0 |
| Case 108 | 6 | 36,076,280  | 43,279,721  | 2 | 2 | 4 | 0 |
| Case 108 | 6 | 43,281,767  | 43,365,360  | 2 | 1 | 3 | 0 |
| Case 108 | 6 | 43,388,054  | 57,217,336  | 2 | 2 | 4 | 0 |
| Case 108 | 6 | 57,227,695  | 57,481,309  | 2 | 1 | 3 | 0 |
| Case 108 | 6 | 57,498,965  | 58,752,089  | 2 | 2 | 4 | 0 |
| Case 108 | 6 | 61,891,118  | 63,458,592  | 2 | 2 | 4 | 0 |
| Case 108 | 6 | 63,458,776  | 63,746,291  | 3 | 2 | 5 | 0 |
| Case 108 | 6 | 63,768,896  | 90,408,705  | 2 | 2 | 4 | 0 |
| Case 108 | 6 | 90,408,742  | 90,605,513  | 2 | 1 | 3 | 0 |
| Case 108 | 6 | 90,605,577  | 136,579,839 | 2 | 2 | 4 | 0 |
| Case 108 | 6 | 136,582,458 | 136,599,885 | 2 | 1 | 3 | 0 |
| Case 108 | 6 | 136,599,912 | 147,872,216 | 2 | 2 | 4 | 0 |
| Case 108 | 6 | 147,876,038 | 147,891,505 | 2 | 1 | 3 | 0 |
| Case 108 | 6 | 147,894,916 | 148,608,485 | 2 | 2 | 4 | 0 |
| Case 108 | 6 | 148,609,400 | 148,761,362 | 2 | 1 | 3 | 0 |
| Case 108 | 6 | 148,761,603 | 149,845,117 | 2 | 2 | 4 | 0 |
| Case 108 | 6 | 149,845,650 | 150,061,959 | 3 | 0 | 3 | 1 |
| Case 108 | 6 | 150,067,105 | 150,421,248 | 3 | 1 | 4 | 0 |
| Case 108 | 6 | 150,422,657 | 151,654,269 | 2 | 2 | 4 | 0 |
| Case 108 | 6 | 151,655,001 | 151,674,887 | 2 | 1 | 3 | 0 |
| Case 108 | 6 | 151,677,358 | 153,402,841 | 2 | 2 | 4 | 0 |
| Case 108 | 6 | 153,404,825 | 154,590,432 | 2 | 1 | 3 | 0 |
| Case 108 | 6 | 154,597,660 | 154,627,294 | 1 | 1 | 2 | 0 |
| Case 108 | 6 | 154,629,080 | 162,713,427 | 2 | 1 | 3 | 0 |
| Case 108 | 6 | 162,716,541 | 162,736,476 | 1 | 0 | 1 | 0 |
| Case 108 | 6 | 162,737,217 | 170,980,171 | 2 | 1 | 3 | 0 |
| Case 108 | 7 | 44,935      | 3,288,471   | 3 | 1 | 4 | 0 |
| Case 108 | 7 | 3,295,229   | 3,974,155   | 3 | 0 | 3 | 1 |
| Case 108 | 7 | 3,978,342   | 5,050,816   | 3 | 1 | 4 | 0 |
| Case 108 | 7 | 5,052,357   | 5,269,361   | 3 | 0 | 3 | 1 |
| Case 108 | 7 | 5,269,369   | 5,619,078   | 3 | 1 | 4 | 0 |
| Case 108 | 7 | 5,626,564   | 6,193,698   | 3 | 0 | 3 | 1 |
| Case 108 | 7 | 6,193,722   | 6,334,747   | 3 | 1 | 4 | 0 |
| Case 108 | 7 | 6,339,313   | 6,870,635   | 3 | 0 | 3 | 1 |
| Case 108 | 7 | 6,870,917   | 23,083,353  | 3 | 1 | 4 | 0 |
| Case 108 | 7 | 23,095,077  | 23,920,231  | 3 | 0 | 3 | 1 |
| Case 108 | 7 | 23,920,558  | 26,224,439  | 3 | 1 | 4 | 0 |
| Case 108 | 7 | 26,224,637  | 26,491,234  | 3 | 0 | 3 | 1 |
| Case 108 | 7 | 26,493,624  | 39,942,647  | 3 | 1 | 4 | 0 |
| Case 108 | 7 | 39,962,864  | 40,498,796  | 3 | 0 | 3 | 1 |

|          |   |             |             |   |   |   |   |
|----------|---|-------------|-------------|---|---|---|---|
| Case 108 | 7 | 40,510,686  | 55,736,508  | 3 | 1 | 4 | 0 |
| Case 108 | 7 | 55,762,611  | 56,437,045  | 3 | 0 | 3 | 1 |
| Case 108 | 7 | 56,467,494  | 57,528,311  | 3 | 1 | 4 | 0 |
| Case 108 | 7 | 57,529,604  | 58,019,061  | 3 | 0 | 3 | 1 |
| Case 108 | 7 | 61,056,053  | 61,852,895  | 3 | 0 | 3 | 1 |
| Case 108 | 7 | 61,994,170  | 62,397,642  | 2 | 0 | 2 | 1 |
| Case 108 | 7 | 62,413,547  | 86,944,642  | 3 | 0 | 3 | 1 |
| Case 108 | 7 | 86,951,809  | 86,985,568  | 2 | 0 | 2 | 1 |
| Case 108 | 7 | 86,986,421  | 87,233,989  | 3 | 0 | 3 | 1 |
| Case 108 | 7 | 87,234,049  | 87,536,615  | 2 | 0 | 2 | 1 |
| Case 108 | 7 | 87,536,634  | 100,679,525 | 3 | 0 | 3 | 1 |
| Case 108 | 7 | 100,679,754 | 100,685,067 | 2 | 0 | 2 | 1 |
| Case 108 | 7 | 100,685,103 | 146,292,088 | 3 | 0 | 3 | 1 |
| Case 108 | 7 | 146,297,650 | 146,332,953 | 4 | 0 | 4 | 1 |
| Case 108 | 7 | 146,348,470 | 159,119,486 | 3 | 0 | 3 | 1 |
| Case 108 | 8 | 164,984     | 22,404,840  | 3 | 1 | 4 | 0 |
| Case 108 | 8 | 22,409,882  | 23,708,887  | 3 | 0 | 3 | 1 |
| Case 108 | 8 | 23,714,122  | 43,791,691  | 3 | 1 | 4 | 0 |
| Case 108 | 8 | 46,886,735  | 91,857,581  | 3 | 1 | 4 | 0 |
| Case 108 | 8 | 91,878,882  | 92,114,936  | 2 | 2 | 4 | 0 |
| Case 108 | 8 | 92,128,840  | 92,128,840  | 2 | 1 | 3 | 0 |
| Case 108 | 8 | 92,136,728  | 92,183,658  | 1 | 0 | 1 | 0 |
| Case 108 | 8 | 92,193,710  | 92,193,710  | 2 | 1 | 3 | 0 |
| Case 108 | 8 | 92,198,211  | 92,222,283  | 2 | 2 | 4 | 0 |
| Case 108 | 8 | 92,227,075  | 103,048,115 | 3 | 1 | 4 | 0 |
| Case 108 | 8 | 103,050,664 | 103,050,664 | 3 | 0 | 3 | 1 |
| Case 108 | 8 | 103,054,099 | 103,056,645 | 2 | 0 | 2 | 1 |
| Case 108 | 8 | 103,058,601 | 103,058,601 | 3 | 0 | 3 | 1 |
| Case 108 | 8 | 103,059,848 | 117,819,007 | 3 | 1 | 4 | 0 |
| Case 108 | 8 | 117,823,217 | 117,836,620 | 2 | 2 | 4 | 0 |
| Case 108 | 8 | 117,838,623 | 118,729,267 | 4 | 1 | 5 | 0 |
| Case 108 | 8 | 118,729,295 | 118,738,651 | 2 | 2 | 4 | 0 |
| Case 108 | 8 | 118,751,200 | 146,293,414 | 3 | 1 | 4 | 0 |
| Case 108 | 9 | 46,587      | 9,204,531   | 2 | 0 | 2 | 1 |
| Case 108 | 9 | 9,211,973   | 9,864,454   | 0 | 0 | 0 | 0 |
| Case 108 | 9 | 9,881,511   | 32,784,875  | 2 | 0 | 2 | 1 |
| Case 108 | 9 | 32,785,076  | 32,831,281  | 4 | 0 | 4 | 1 |
| Case 108 | 9 | 32,834,922  | 35,699,047  | 5 | 0 | 5 | 1 |
| Case 108 | 9 | 35,699,403  | 35,699,403  | 2 | 0 | 2 | 1 |
| Case 108 | 9 | 35,700,150  | 36,647,786  | 4 | 0 | 4 | 1 |
| Case 108 | 9 | 36,651,762  | 36,722,854  | 3 | 0 | 3 | 1 |
| Case 108 | 9 | 36,725,914  | 41,451,854  | 4 | 0 | 4 | 1 |
| Case 108 | 9 | 41,981,757  | 44,863,631  | 3 | 0 | 3 | 1 |
| Case 108 | 9 | 44,865,026  | 46,944,322  | 2 | 2 | 4 | 0 |
| Case 108 | 9 | 65,629,772  | 66,288,522  | 2 | 2 | 4 | 0 |
| Case 108 | 9 | 67,066,659  | 69,238,239  | 2 | 1 | 3 | 0 |
| Case 108 | 9 | 69,355,037  | 71,883,224  | 5 | 1 | 6 | 0 |
| Case 108 | 9 | 71,886,979  | 71,985,151  | 6 | 1 | 7 | 0 |
| Case 108 | 9 | 71,986,508  | 72,210,569  | 5 | 1 | 6 | 0 |
| Case 108 | 9 | 72,213,799  | 72,527,688  | 6 | 1 | 7 | 0 |
| Case 108 | 9 | 72,530,831  | 72,783,618  | 5 | 1 | 6 | 0 |
| Case 108 | 9 | 72,785,531  | 73,149,151  | 6 | 1 | 7 | 0 |
| Case 108 | 9 | 73,149,897  | 73,250,037  | 4 | 1 | 5 | 0 |
| Case 108 | 9 | 73,255,554  | 74,299,442  | 5 | 1 | 6 | 0 |
| Case 108 | 9 | 74,300,174  | 75,193,543  | 4 | 1 | 5 | 0 |
| Case 108 | 9 | 75,193,817  | 75,193,817  | 2 | 1 | 3 | 0 |
| Case 108 | 9 | 75,194,978  | 75,721,599  | 5 | 1 | 6 | 0 |
| Case 108 | 9 | 75,729,671  | 75,744,524  | 2 | 2 | 4 | 0 |
| Case 108 | 9 | 75,745,448  | 76,767,313  | 3 | 2 | 5 | 0 |
| Case 108 | 9 | 76,775,785  | 76,786,297  | 2 | 2 | 4 | 0 |
| Case 108 | 9 | 76,787,591  | 77,848,630  | 2 | 1 | 3 | 0 |

|          |   |             |             |   |   |   |   |
|----------|---|-------------|-------------|---|---|---|---|
| Case 108 | 9 | 77,848,711  | 77,881,317  | 2 | 2 | 4 | 0 |
| Case 108 | 9 | 77,895,520  | 80,355,515  | 2 | 1 | 3 | 0 |
| Case 108 | 9 | 80,364,115  | 80,727,620  | 2 | 2 | 4 | 0 |
| Case 108 | 9 | 80,742,806  | 85,434,314  | 2 | 1 | 3 | 0 |
| Case 108 | 9 | 85,436,498  | 85,579,528  | 2 | 2 | 4 | 0 |
| Case 108 | 9 | 85,590,972  | 85,798,771  | 2 | 1 | 3 | 0 |
| Case 108 | 9 | 85,798,903  | 85,835,108  | 2 | 2 | 4 | 0 |
| Case 108 | 9 | 85,835,157  | 89,614,276  | 2 | 1 | 3 | 0 |
| Case 108 | 9 | 89,619,991  | 89,936,504  | 2 | 2 | 4 | 0 |
| Case 108 | 9 | 89,939,154  | 91,995,971  | 2 | 1 | 3 | 0 |
| Case 108 | 9 | 91,996,255  | 92,228,559  | 2 | 2 | 4 | 0 |
| Case 108 | 9 | 92,231,020  | 93,642,897  | 2 | 1 | 3 | 0 |
| Case 108 | 9 | 93,644,948  | 93,714,388  | 2 | 2 | 4 | 0 |
| Case 108 | 9 | 93,716,229  | 94,882,488  | 2 | 1 | 3 | 0 |
| Case 108 | 9 | 94,883,070  | 94,947,595  | 2 | 2 | 4 | 0 |
| Case 108 | 9 | 94,949,715  | 95,887,281  | 2 | 1 | 3 | 0 |
| Case 108 | 9 | 95,887,320  | 96,774,518  | 2 | 2 | 4 | 0 |
| Case 108 | 9 | 96,776,609  | 98,278,972  | 2 | 1 | 3 | 0 |
| Case 108 | 9 | 98,283,093  | 98,550,264  | 2 | 2 | 4 | 0 |
| Case 108 | 9 | 98,550,467  | 98,818,646  | 2 | 1 | 3 | 0 |
| Case 108 | 9 | 98,823,407  | 98,991,303  | 2 | 2 | 4 | 0 |
| Case 108 | 9 | 98,991,519  | 101,125,025 | 2 | 1 | 3 | 0 |
| Case 108 | 9 | 101,125,148 | 101,678,096 | 2 | 2 | 4 | 0 |
| Case 108 | 9 | 101,678,273 | 101,747,885 | 2 | 1 | 3 | 0 |
| Case 108 | 9 | 101,748,054 | 101,784,777 | 2 | 2 | 4 | 0 |
| Case 108 | 9 | 101,785,207 | 103,803,109 | 2 | 1 | 3 | 0 |
| Case 108 | 9 | 103,805,207 | 103,969,852 | 2 | 2 | 4 | 0 |
| Case 108 | 9 | 103,976,442 | 104,474,060 | 2 | 1 | 3 | 0 |
| Case 108 | 9 | 104,475,496 | 104,630,136 | 2 | 2 | 4 | 0 |
| Case 108 | 9 | 104,637,950 | 106,989,653 | 2 | 1 | 3 | 0 |
| Case 108 | 9 | 106,993,898 | 107,360,922 | 2 | 2 | 4 | 0 |
| Case 108 | 9 | 107,361,003 | 107,361,059 | 2 | 1 | 3 | 0 |
| Case 108 | 9 | 107,361,680 | 107,367,368 | 1 | 1 | 2 | 0 |
| Case 108 | 9 | 107,370,498 | 107,370,498 | 2 | 1 | 3 | 0 |
| Case 108 | 9 | 107,373,929 | 109,010,799 | 2 | 2 | 4 | 0 |
| Case 108 | 9 | 109,014,185 | 109,686,435 | 4 | 1 | 5 | 0 |
| Case 108 | 9 | 109,686,588 | 109,692,942 | 2 | 2 | 4 | 0 |
| Case 108 | 9 | 109,697,822 | 110,843,927 | 4 | 1 | 5 | 0 |
| Case 108 | 9 | 110,844,942 | 111,414,999 | 2 | 2 | 4 | 0 |
| Case 108 | 9 | 111,417,991 | 112,074,707 | 2 | 1 | 3 | 0 |
| Case 108 | 9 | 112,078,548 | 112,172,674 | 2 | 2 | 4 | 0 |
| Case 108 | 9 | 112,189,275 | 112,897,866 | 4 | 1 | 5 | 0 |
| Case 108 | 9 | 112,898,528 | 112,900,135 | 2 | 2 | 4 | 0 |
| Case 108 | 9 | 112,900,199 | 115,666,561 | 4 | 1 | 5 | 0 |
| Case 108 | 9 | 115,669,613 | 116,464,160 | 2 | 2 | 4 | 0 |
| Case 108 | 9 | 116,468,123 | 116,837,308 | 2 | 1 | 3 | 0 |
| Case 108 | 9 | 116,837,745 | 117,078,286 | 2 | 2 | 4 | 0 |
| Case 108 | 9 | 117,078,838 | 117,143,588 | 2 | 1 | 3 | 0 |
| Case 108 | 9 | 117,143,589 | 117,183,149 | 2 | 2 | 4 | 0 |
| Case 108 | 9 | 117,185,395 | 117,927,227 | 2 | 1 | 3 | 0 |
| Case 108 | 9 | 117,928,419 | 118,255,516 | 2 | 2 | 4 | 0 |
| Case 108 | 9 | 118,255,620 | 119,913,608 | 2 | 1 | 3 | 0 |
| Case 108 | 9 | 119,913,953 | 120,029,861 | 2 | 2 | 4 | 0 |
| Case 108 | 9 | 120,031,254 | 120,962,282 | 2 | 1 | 3 | 0 |
| Case 108 | 9 | 120,967,585 | 121,312,824 | 2 | 2 | 4 | 0 |
| Case 108 | 9 | 121,314,808 | 122,868,788 | 2 | 1 | 3 | 0 |
| Case 108 | 9 | 122,873,248 | 123,239,643 | 2 | 2 | 4 | 0 |
| Case 108 | 9 | 123,249,648 | 127,054,184 | 2 | 1 | 3 | 0 |
| Case 108 | 9 | 127,060,431 | 127,163,623 | 2 | 2 | 4 | 0 |
| Case 108 | 9 | 127,167,651 | 128,746,044 | 2 | 1 | 3 | 0 |
| Case 108 | 9 | 128,748,401 | 129,458,757 | 2 | 2 | 4 | 0 |

|          |    |             |             |   |   |   |   |
|----------|----|-------------|-------------|---|---|---|---|
| Case 108 | 9  | 129,459,478 | 134,657,367 | 2 | 1 | 3 | 0 |
| Case 108 | 9  | 134,660,273 | 135,132,930 | 2 | 2 | 4 | 0 |
| Case 108 | 9  | 135,133,039 | 135,934,431 | 2 | 1 | 3 | 0 |
| Case 108 | 9  | 135,940,433 | 136,027,763 | 2 | 2 | 4 | 0 |
| Case 108 | 9  | 136,028,453 | 136,359,085 | 2 | 1 | 3 | 0 |
| Case 108 | 9  | 136,362,740 | 136,599,146 | 2 | 2 | 4 | 0 |
| Case 108 | 9  | 136,600,201 | 136,666,560 | 2 | 1 | 3 | 0 |
| Case 108 | 9  | 136,669,004 | 136,928,276 | 2 | 2 | 4 | 0 |
| Case 108 | 9  | 136,928,644 | 137,100,317 | 2 | 1 | 3 | 0 |
| Case 108 | 9  | 137,101,104 | 138,292,054 | 2 | 2 | 4 | 0 |
| Case 108 | 9  | 138,292,538 | 138,540,992 | 2 | 1 | 3 | 0 |
| Case 108 | 9  | 138,544,017 | 138,662,465 | 2 | 2 | 4 | 0 |
| Case 108 | 9  | 138,662,812 | 138,903,733 | 2 | 1 | 3 | 0 |
| Case 108 | 9  | 138,905,136 | 139,272,058 | 2 | 2 | 4 | 0 |
| Case 108 | 9  | 139,272,098 | 139,374,952 | 2 | 1 | 3 | 0 |
| Case 108 | 9  | 139,375,962 | 139,653,133 | 2 | 2 | 4 | 0 |
| Case 108 | 9  | 139,656,670 | 140,000,649 | 2 | 1 | 3 | 0 |
| Case 108 | 9  | 140,000,751 | 140,069,824 | 2 | 2 | 4 | 0 |
| Case 108 | 9  | 140,069,828 | 140,267,490 | 2 | 1 | 3 | 0 |
| Case 108 | 9  | 140,267,503 | 140,329,691 | 2 | 2 | 4 | 0 |
| Case 108 | 9  | 140,329,693 | 141,066,491 | 2 | 1 | 3 | 0 |
| Case 108 | 10 | 98,087      | 39,097,912  | 2 | 2 | 4 | 0 |
| Case 108 | 10 | 42,436,301  | 46,964,021  | 2 | 2 | 4 | 0 |
| Case 108 | 10 | 46,965,017  | 47,555,294  | 2 | 1 | 3 | 0 |
| Case 108 | 10 | 47,568,296  | 58,885,646  | 2 | 2 | 4 | 0 |
| Case 108 | 10 | 58,892,275  | 58,936,939  | 2 | 1 | 3 | 0 |
| Case 108 | 10 | 58,937,708  | 84,655,185  | 2 | 2 | 4 | 0 |
| Case 108 | 10 | 84,656,170  | 84,847,268  | 2 | 1 | 3 | 0 |
| Case 108 | 10 | 84,855,219  | 135,477,883 | 2 | 2 | 4 | 0 |
| Case 108 | 11 | 193,146     | 2,192,950   | 2 | 1 | 3 | 0 |
| Case 108 | 11 | 2,193,001   | 7,217,025   | 3 | 0 | 3 | 1 |
| Case 108 | 11 | 7,232,673   | 18,497,991  | 2 | 1 | 3 | 0 |
| Case 108 | 11 | 18,498,006  | 18,555,936  | 1 | 1 | 2 | 0 |
| Case 108 | 11 | 18,562,982  | 21,582,217  | 2 | 1 | 3 | 0 |
| Case 108 | 11 | 21,586,339  | 21,588,442  | 5 | 1 | 6 | 0 |
| Case 108 | 11 | 21,592,329  | 21,600,567  | 2 | 1 | 3 | 0 |
| Case 108 | 11 | 21,601,797  | 22,178,677  | 5 | 1 | 6 | 0 |
| Case 108 | 11 | 22,183,281  | 22,539,603  | 4 | 1 | 5 | 0 |
| Case 108 | 11 | 22,540,139  | 22,755,093  | 2 | 1 | 3 | 0 |
| Case 108 | 11 | 22,758,660  | 23,224,499  | 5 | 1 | 6 | 0 |
| Case 108 | 11 | 23,224,901  | 23,690,735  | 6 | 1 | 7 | 0 |
| Case 108 | 11 | 23,694,031  | 23,736,582  | 2 | 2 | 4 | 0 |
| Case 108 | 11 | 23,741,440  | 24,210,175  | 6 | 1 | 7 | 0 |
| Case 108 | 11 | 24,211,321  | 24,440,965  | 5 | 1 | 6 | 0 |
| Case 108 | 11 | 24,446,873  | 24,457,755  | 2 | 1 | 3 | 0 |
| Case 108 | 11 | 24,469,451  | 24,759,780  | 4 | 1 | 5 | 0 |
| Case 108 | 11 | 24,770,644  | 24,770,644  | 2 | 1 | 3 | 0 |
| Case 108 | 11 | 24,772,667  | 24,822,669  | 5 | 1 | 6 | 0 |
| Case 108 | 11 | 24,829,963  | 39,700,963  | 2 | 1 | 3 | 0 |
| Case 108 | 11 | 39,709,068  | 40,105,120  | 5 | 1 | 6 | 0 |
| Case 108 | 11 | 40,105,881  | 45,001,728  | 2 | 1 | 3 | 0 |
| Case 108 | 11 | 45,009,133  | 45,959,836  | 5 | 1 | 6 | 0 |
| Case 108 | 11 | 45,970,084  | 46,237,731  | 6 | 1 | 7 | 0 |
| Case 108 | 11 | 46,240,487  | 46,515,749  | 5 | 1 | 6 | 0 |
| Case 108 | 11 | 46,520,302  | 46,575,394  | 4 | 1 | 5 | 0 |
| Case 108 | 11 | 46,596,674  | 46,751,085  | 2 | 1 | 3 | 0 |
| Case 108 | 11 | 46,760,913  | 46,958,381  | 4 | 1 | 5 | 0 |
| Case 108 | 11 | 46,962,474  | 46,962,474  | 2 | 1 | 3 | 0 |
| Case 108 | 11 | 46,963,196  | 47,188,411  | 5 | 1 | 6 | 0 |
| Case 108 | 11 | 47,188,426  | 48,373,827  | 4 | 1 | 5 | 0 |
| Case 108 | 11 | 48,373,849  | 48,373,849  | 2 | 2 | 4 | 0 |

|          |    |             |             |   |   |   |   |
|----------|----|-------------|-------------|---|---|---|---|
| Case 108 | 11 | 48,375,604  | 49,010,832  | 6 | 1 | 7 | 0 |
| Case 108 | 11 | 49,018,666  | 49,965,330  | 4 | 1 | 5 | 0 |
| Case 108 | 11 | 49,974,473  | 50,008,258  | 2 | 2 | 4 | 0 |
| Case 108 | 11 | 50,057,854  | 50,238,588  | 4 | 1 | 5 | 0 |
| Case 108 | 11 | 50,241,556  | 50,325,741  | 2 | 1 | 3 | 0 |
| Case 108 | 11 | 50,332,064  | 50,630,255  | 1 | 1 | 2 | 0 |
| Case 108 | 11 | 50,668,400  | 51,591,253  | 2 | 1 | 3 | 0 |
| Case 108 | 11 | 54,794,237  | 55,362,955  | 2 | 1 | 3 | 0 |
| Case 108 | 11 | 55,370,325  | 55,427,700  | 1 | 0 | 1 | 0 |
| Case 108 | 11 | 55,431,897  | 66,348,648  | 2 | 1 | 3 | 0 |
| Case 108 | 11 | 66,358,126  | 67,190,928  | 5 | 1 | 6 | 0 |
| Case 108 | 11 | 67,191,327  | 69,087,550  | 2 | 1 | 3 | 0 |
| Case 108 | 11 | 69,150,850  | 69,248,131  | 7 | 0 | 7 | 1 |
| Case 108 | 11 | 69,252,000  | 69,351,911  | 2 | 1 | 3 | 0 |
| Case 108 | 11 | 69,364,292  | 69,828,594  | 7 | 0 | 7 | 1 |
| Case 108 | 11 | 69,834,983  | 69,845,815  | 2 | 1 | 3 | 0 |
| Case 108 | 11 | 69,854,906  | 69,877,928  | 7 | 0 | 7 | 1 |
| Case 108 | 11 | 69,880,281  | 134,934,063 | 2 | 1 | 3 | 0 |
| Case 108 | 12 | 191,619     | 3,325,404   | 3 | 0 | 3 | 1 |
| Case 108 | 12 | 3,325,543   | 3,444,974   | 4 | 0 | 4 | 1 |
| Case 108 | 12 | 3,445,441   | 34,853,011  | 3 | 0 | 3 | 1 |
| Case 108 | 12 | 37,876,400  | 89,555,117  | 3 | 0 | 3 | 1 |
| Case 108 | 12 | 89,555,278  | 120,575,778 | 4 | 0 | 4 | 1 |
| Case 108 | 12 | 120,580,323 | 133,810,935 | 3 | 0 | 3 | 1 |
| Case 108 | 13 | 19,058,717  | 23,539,563  | 2 | 1 | 3 | 0 |
| Case 108 | 13 | 23,546,238  | 23,553,518  | 1 | 0 | 1 | 0 |
| Case 108 | 13 | 23,553,786  | 24,578,032  | 2 | 1 | 3 | 0 |
| Case 108 | 13 | 24,578,110  | 24,698,806  | 2 | 2 | 4 | 0 |
| Case 108 | 13 | 24,701,318  | 27,471,242  | 2 | 1 | 3 | 0 |
| Case 108 | 13 | 27,471,874  | 27,492,788  | 2 | 2 | 4 | 0 |
| Case 108 | 13 | 27,495,853  | 27,941,474  | 2 | 1 | 3 | 0 |
| Case 108 | 13 | 27,946,485  | 28,255,807  | 2 | 0 | 2 | 1 |
| Case 108 | 13 | 28,259,991  | 28,271,317  | 1 | 0 | 1 | 0 |
| Case 108 | 13 | 28,282,522  | 29,552,602  | 2 | 1 | 3 | 0 |
| Case 108 | 13 | 29,553,229  | 31,926,477  | 2 | 2 | 4 | 0 |
| Case 108 | 13 | 31,927,523  | 35,434,797  | 3 | 1 | 4 | 0 |
| Case 108 | 13 | 35,435,176  | 35,517,220  | 2 | 2 | 4 | 0 |
| Case 108 | 13 | 35,573,362  | 36,265,658  | 2 | 1 | 3 | 0 |
| Case 108 | 13 | 36,266,322  | 36,313,068  | 2 | 2 | 4 | 0 |
| Case 108 | 13 | 36,318,869  | 40,658,787  | 2 | 1 | 3 | 0 |
| Case 108 | 13 | 40,662,742  | 40,745,272  | 2 | 2 | 4 | 0 |
| Case 108 | 13 | 40,746,499  | 43,696,112  | 2 | 1 | 3 | 0 |
| Case 108 | 13 | 43,696,902  | 43,814,236  | 2 | 2 | 4 | 0 |
| Case 108 | 13 | 43,815,123  | 44,827,881  | 2 | 1 | 3 | 0 |
| Case 108 | 13 | 44,829,300  | 44,920,148  | 2 | 2 | 4 | 0 |
| Case 108 | 13 | 44,921,027  | 47,620,477  | 2 | 1 | 3 | 0 |
| Case 108 | 13 | 47,620,956  | 47,716,018  | 2 | 2 | 4 | 0 |
| Case 108 | 13 | 47,726,258  | 49,173,538  | 2 | 1 | 3 | 0 |
| Case 108 | 13 | 49,174,128  | 49,241,654  | 2 | 2 | 4 | 0 |
| Case 108 | 13 | 49,250,997  | 53,625,910  | 2 | 1 | 3 | 0 |
| Case 108 | 13 | 53,634,089  | 53,903,511  | 2 | 2 | 4 | 0 |
| Case 108 | 13 | 53,907,427  | 72,227,298  | 2 | 1 | 3 | 0 |
| Case 108 | 13 | 72,231,846  | 72,829,633  | 2 | 2 | 4 | 0 |
| Case 108 | 13 | 72,833,522  | 80,298,141  | 2 | 1 | 3 | 0 |
| Case 108 | 13 | 80,299,722  | 80,427,723  | 2 | 2 | 4 | 0 |
| Case 108 | 13 | 80,440,160  | 82,786,608  | 2 | 1 | 3 | 0 |
| Case 108 | 13 | 82,792,586  | 82,796,488  | 1 | 0 | 1 | 0 |
| Case 108 | 13 | 82,819,766  | 105,193,816 | 2 | 1 | 3 | 0 |
| Case 108 | 13 | 105,195,743 | 105,371,668 | 2 | 2 | 4 | 0 |
| Case 108 | 13 | 105,377,463 | 105,477,622 | 2 | 1 | 3 | 0 |
| Case 108 | 13 | 105,477,766 | 105,593,166 | 2 | 2 | 4 | 0 |

|          |    |             |             |   |   |   |   |
|----------|----|-------------|-------------|---|---|---|---|
| Case 108 | 13 | 105,593,424 | 105,784,623 | 2 | 1 | 3 | 0 |
| Case 108 | 13 | 105,791,638 | 106,098,389 | 2 | 2 | 4 | 0 |
| Case 108 | 13 | 106,110,385 | 106,182,717 | 2 | 1 | 3 | 0 |
| Case 108 | 13 | 106,184,880 | 108,711,217 | 2 | 2 | 4 | 0 |
| Case 108 | 13 | 108,713,121 | 108,977,731 | 2 | 1 | 3 | 0 |
| Case 108 | 13 | 108,984,010 | 109,177,502 | 2 | 2 | 4 | 0 |
| Case 108 | 13 | 109,181,183 | 109,500,202 | 2 | 1 | 3 | 0 |
| Case 108 | 13 | 109,500,283 | 109,605,067 | 2 | 2 | 4 | 0 |
| Case 108 | 13 | 109,605,541 | 110,242,391 | 2 | 1 | 3 | 0 |
| Case 108 | 13 | 110,244,322 | 111,722,431 | 2 | 2 | 4 | 0 |
| Case 108 | 13 | 111,722,664 | 111,938,889 | 2 | 1 | 3 | 0 |
| Case 108 | 13 | 111,948,823 | 112,983,664 | 2 | 2 | 4 | 0 |
| Case 108 | 13 | 112,988,594 | 113,223,467 | 2 | 1 | 3 | 0 |
| Case 108 | 13 | 113,223,897 | 113,784,998 | 2 | 2 | 4 | 0 |
| Case 108 | 13 | 113,786,125 | 114,212,852 | 2 | 1 | 3 | 0 |
| Case 108 | 13 | 114,217,470 | 115,103,529 | 2 | 2 | 4 | 0 |
| Case 108 | 14 | 19,280,733  | 22,187,832  | 2 | 1 | 3 | 0 |
| Case 108 | 14 | 22,189,306  | 23,027,352  | 2 | 2 | 4 | 0 |
| Case 108 | 14 | 23,027,378  | 25,428,420  | 2 | 1 | 3 | 0 |
| Case 108 | 14 | 25,429,027  | 25,566,203  | 2 | 2 | 4 | 0 |
| Case 108 | 14 | 25,570,197  | 25,969,220  | 2 | 1 | 3 | 0 |
| Case 108 | 14 | 25,972,098  | 26,040,088  | 2 | 2 | 4 | 0 |
| Case 108 | 14 | 26,045,320  | 26,390,960  | 2 | 1 | 3 | 0 |
| Case 108 | 14 | 26,391,207  | 26,571,897  | 2 | 2 | 4 | 0 |
| Case 108 | 14 | 26,575,000  | 27,932,831  | 2 | 1 | 3 | 0 |
| Case 108 | 14 | 27,935,430  | 28,095,823  | 2 | 2 | 4 | 0 |
| Case 108 | 14 | 28,106,048  | 30,645,664  | 2 | 1 | 3 | 0 |
| Case 108 | 14 | 30,649,776  | 30,839,557  | 2 | 2 | 4 | 0 |
| Case 108 | 14 | 30,845,210  | 32,385,574  | 2 | 1 | 3 | 0 |
| Case 108 | 14 | 32,388,467  | 32,501,255  | 2 | 2 | 4 | 0 |
| Case 108 | 14 | 32,509,543  | 32,589,339  | 2 | 1 | 3 | 0 |
| Case 108 | 14 | 32,592,200  | 34,895,977  | 2 | 2 | 4 | 0 |
| Case 108 | 14 | 34,899,300  | 35,237,677  | 2 | 1 | 3 | 0 |
| Case 108 | 14 | 35,239,965  | 38,299,266  | 2 | 2 | 4 | 0 |
| Case 108 | 14 | 38,307,511  | 39,709,768  | 2 | 1 | 3 | 0 |
| Case 108 | 14 | 39,709,769  | 39,819,314  | 1 | 1 | 2 | 0 |
| Case 108 | 14 | 39,821,153  | 45,606,290  | 2 | 1 | 3 | 0 |
| Case 108 | 14 | 45,606,301  | 45,785,039  | 1 | 1 | 2 | 0 |
| Case 108 | 14 | 45,786,839  | 53,027,908  | 2 | 1 | 3 | 0 |
| Case 108 | 14 | 53,033,148  | 53,249,368  | 1 | 1 | 2 | 0 |
| Case 108 | 14 | 53,254,224  | 58,669,409  | 2 | 1 | 3 | 0 |
| Case 108 | 14 | 58,669,637  | 58,937,419  | 1 | 1 | 2 | 0 |
| Case 108 | 14 | 58,941,425  | 64,464,101  | 2 | 1 | 3 | 0 |
| Case 108 | 14 | 64,465,019  | 64,529,597  | 1 | 1 | 2 | 0 |
| Case 108 | 14 | 64,530,337  | 85,351,754  | 2 | 1 | 3 | 0 |
| Case 108 | 14 | 85,355,544  | 106,047,905 | 2 | 2 | 4 | 0 |
| Case 108 | 14 | 106,067,618 | 106,175,202 | 6 | 1 | 7 | 0 |
| Case 108 | 14 | 106,197,115 | 107,287,663 | 2 | 2 | 4 | 0 |
| Case 108 | 15 | 20,034,919  | 102,461,162 | 3 | 0 | 3 | 1 |
| Case 108 | 16 | 88,165      | 6,732,433   | 3 | 1 | 4 | 0 |
| Case 108 | 16 | 6,733,771   | 6,735,137   | 3 | 0 | 3 | 1 |
| Case 108 | 16 | 6,736,475   | 12,704,511  | 3 | 1 | 4 | 0 |
| Case 108 | 16 | 12,704,565  | 12,717,611  | 3 | 0 | 3 | 1 |
| Case 108 | 16 | 12,717,835  | 30,681,156  | 3 | 1 | 4 | 0 |
| Case 108 | 16 | 30,700,858  | 30,771,021  | 3 | 0 | 3 | 1 |
| Case 108 | 16 | 30,771,757  | 35,285,582  | 3 | 1 | 4 | 0 |
| Case 108 | 16 | 46,450,037  | 78,258,810  | 3 | 1 | 4 | 0 |
| Case 108 | 16 | 78,260,521  | 78,816,792  | 2 | 2 | 4 | 0 |
| Case 108 | 16 | 78,817,229  | 78,901,140  | 3 | 2 | 5 | 0 |
| Case 108 | 16 | 78,901,657  | 79,363,814  | 2 | 2 | 4 | 0 |
| Case 108 | 16 | 79,364,679  | 81,075,056  | 3 | 2 | 5 | 0 |

|          |    |            |            |   |   |   |   |
|----------|----|------------|------------|---|---|---|---|
| Case 108 | 16 | 81,076,066 | 81,171,635 | 2 | 2 | 4 | 0 |
| Case 108 | 16 | 81,172,338 | 81,219,257 | 3 | 2 | 5 | 0 |
| Case 108 | 16 | 81,222,526 | 81,962,190 | 2 | 2 | 4 | 0 |
| Case 108 | 16 | 81,963,618 | 84,117,219 | 3 | 2 | 5 | 0 |
| Case 108 | 16 | 84,118,667 | 84,209,738 | 2 | 2 | 4 | 0 |
| Case 108 | 16 | 84,209,816 | 84,381,553 | 3 | 2 | 5 | 0 |
| Case 108 | 16 | 84,382,543 | 84,495,648 | 2 | 2 | 4 | 0 |
| Case 108 | 16 | 84,495,694 | 84,786,347 | 3 | 2 | 5 | 0 |
| Case 108 | 16 | 84,793,348 | 84,914,850 | 2 | 2 | 4 | 0 |
| Case 108 | 16 | 84,916,775 | 87,739,087 | 3 | 2 | 5 | 0 |
| Case 108 | 16 | 87,739,489 | 87,799,414 | 2 | 2 | 4 | 0 |
| Case 108 | 16 | 87,800,470 | 89,347,372 | 3 | 2 | 5 | 0 |
| Case 108 | 16 | 89,347,431 | 89,613,145 | 2 | 2 | 4 | 0 |
| Case 108 | 16 | 89,613,169 | 89,712,997 | 3 | 2 | 5 | 0 |
| Case 108 | 16 | 89,713,096 | 89,762,090 | 2 | 2 | 4 | 0 |
| Case 108 | 16 | 89,762,136 | 89,811,469 | 3 | 2 | 5 | 0 |
| Case 108 | 16 | 89,812,283 | 89,972,691 | 2 | 2 | 4 | 0 |
| Case 108 | 16 | 89,977,051 | 90,274,695 | 3 | 2 | 5 | 0 |
| Case 108 | 17 | 11,885     | 1,204,864  | 3 | 0 | 3 | 1 |
| Case 108 | 17 | 1,206,042  | 2,553,152  | 3 | 1 | 4 | 0 |
| Case 108 | 17 | 2,553,836  | 22,242,355 | 3 | 0 | 3 | 1 |
| Case 108 | 17 | 25,268,142 | 28,383,709 | 3 | 0 | 3 | 1 |
| Case 108 | 17 | 28,384,861 | 29,325,782 | 3 | 1 | 4 | 0 |
| Case 108 | 17 | 29,326,155 | 31,350,878 | 3 | 0 | 3 | 1 |
| Case 108 | 17 | 31,351,014 | 31,488,753 | 4 | 0 | 4 | 1 |
| Case 108 | 17 | 31,490,349 | 32,022,320 | 3 | 0 | 3 | 1 |
| Case 108 | 17 | 32,025,626 | 32,354,753 | 4 | 0 | 4 | 1 |
| Case 108 | 17 | 32,356,013 | 32,730,550 | 3 | 0 | 3 | 1 |
| Case 108 | 17 | 32,731,049 | 33,214,359 | 3 | 1 | 4 | 0 |
| Case 108 | 17 | 33,214,714 | 33,872,797 | 3 | 0 | 3 | 1 |
| Case 108 | 17 | 33,874,678 | 34,461,489 | 3 | 1 | 4 | 0 |
| Case 108 | 17 | 34,461,869 | 35,537,269 | 3 | 0 | 3 | 1 |
| Case 108 | 17 | 35,543,678 | 36,307,189 | 3 | 1 | 4 | 0 |
| Case 108 | 17 | 36,450,598 | 36,991,482 | 3 | 0 | 3 | 1 |
| Case 108 | 17 | 36,991,576 | 37,387,413 | 3 | 1 | 4 | 0 |
| Case 108 | 17 | 37,389,409 | 37,687,522 | 3 | 0 | 3 | 1 |
| Case 108 | 17 | 37,696,852 | 38,264,197 | 3 | 1 | 4 | 0 |
| Case 108 | 17 | 38,277,468 | 38,447,569 | 3 | 0 | 3 | 1 |
| Case 108 | 17 | 38,447,570 | 40,542,210 | 3 | 1 | 4 | 0 |
| Case 108 | 17 | 40,542,501 | 41,433,660 | 3 | 0 | 3 | 1 |
| Case 108 | 17 | 41,445,145 | 43,493,101 | 3 | 1 | 4 | 0 |
| Case 108 | 17 | 43,504,831 | 46,780,497 | 3 | 0 | 3 | 1 |
| Case 108 | 17 | 46,780,761 | 47,114,033 | 3 | 1 | 4 | 0 |
| Case 108 | 17 | 47,115,038 | 47,246,247 | 3 | 0 | 3 | 1 |
| Case 108 | 17 | 47,246,894 | 47,691,812 | 3 | 1 | 4 | 0 |
| Case 108 | 17 | 47,693,686 | 47,903,851 | 3 | 0 | 3 | 1 |
| Case 108 | 17 | 47,904,783 | 53,158,524 | 3 | 1 | 4 | 0 |
| Case 108 | 17 | 53,166,323 | 63,761,473 | 3 | 0 | 3 | 1 |
| Case 108 | 17 | 63,771,970 | 64,001,862 | 4 | 0 | 4 | 1 |
| Case 108 | 17 | 64,010,003 | 66,119,884 | 3 | 0 | 3 | 1 |
| Case 108 | 17 | 66,127,358 | 69,677,537 | 3 | 1 | 4 | 0 |
| Case 108 | 17 | 69,686,684 | 71,231,792 | 4 | 0 | 4 | 1 |
| Case 108 | 17 | 71,231,868 | 71,239,136 | 3 | 0 | 3 | 1 |
| Case 108 | 17 | 71,239,137 | 71,809,337 | 3 | 1 | 4 | 0 |
| Case 108 | 17 | 71,811,006 | 71,916,715 | 3 | 0 | 3 | 1 |
| Case 108 | 17 | 71,928,292 | 72,173,910 | 3 | 1 | 4 | 0 |
| Case 108 | 17 | 72,174,922 | 74,515,405 | 3 | 0 | 3 | 1 |
| Case 108 | 17 | 74,527,606 | 81,060,040 | 3 | 1 | 4 | 0 |
| Case 108 | 18 | 87,505     | 15,375,878 | 2 | 0 | 2 | 1 |
| Case 108 | 18 | 18,520,354 | 20,128,882 | 5 | 1 | 6 | 0 |
| Case 108 | 18 | 20,132,564 | 26,490,208 | 2 | 0 | 2 | 1 |

|          |    |            |            |   |   |   |   |
|----------|----|------------|------------|---|---|---|---|
| Case 108 | 18 | 26,492,729 | 26,730,357 | 6 | 1 | 7 | 0 |
| Case 108 | 18 | 26,735,235 | 26,953,823 | 5 | 1 | 6 | 0 |
| Case 108 | 18 | 26,958,653 | 27,907,683 | 6 | 1 | 7 | 0 |
| Case 108 | 18 | 27,907,956 | 28,202,872 | 5 | 1 | 6 | 0 |
| Case 108 | 18 | 28,209,686 | 28,574,307 | 6 | 1 | 7 | 0 |
| Case 108 | 18 | 28,574,450 | 28,712,639 | 5 | 1 | 6 | 0 |
| Case 108 | 18 | 28,712,654 | 28,741,907 | 6 | 1 | 7 | 0 |
| Case 108 | 18 | 28,742,512 | 28,992,822 | 5 | 1 | 6 | 0 |
| Case 108 | 18 | 28,993,073 | 28,995,493 | 2 | 2 | 4 | 0 |
| Case 108 | 18 | 29,009,409 | 29,054,229 | 5 | 1 | 6 | 0 |
| Case 108 | 18 | 29,054,285 | 29,056,170 | 2 | 2 | 4 | 0 |
| Case 108 | 18 | 29,056,465 | 29,101,120 | 6 | 1 | 7 | 0 |
| Case 108 | 18 | 29,101,196 | 30,481,131 | 5 | 1 | 6 | 0 |
| Case 108 | 18 | 30,488,989 | 31,319,905 | 6 | 1 | 7 | 0 |
| Case 108 | 18 | 31,319,947 | 31,326,415 | 2 | 2 | 4 | 0 |
| Case 108 | 18 | 31,327,296 | 31,788,458 | 6 | 1 | 7 | 0 |
| Case 108 | 18 | 31,813,635 | 32,364,435 | 2 | 0 | 2 | 1 |
| Case 108 | 18 | 32,373,736 | 33,324,054 | 5 | 1 | 6 | 0 |
| Case 108 | 18 | 33,326,544 | 33,536,145 | 6 | 1 | 7 | 0 |
| Case 108 | 18 | 33,541,089 | 33,707,164 | 5 | 1 | 6 | 0 |
| Case 108 | 18 | 33,709,217 | 33,747,114 | 6 | 1 | 7 | 0 |
| Case 108 | 18 | 33,749,871 | 34,183,939 | 5 | 1 | 6 | 0 |
| Case 108 | 18 | 34,184,093 | 34,256,593 | 6 | 1 | 7 | 0 |
| Case 108 | 18 | 34,258,129 | 36,068,971 | 5 | 1 | 6 | 0 |
| Case 108 | 18 | 36,083,127 | 49,566,783 | 2 | 0 | 2 | 1 |
| Case 108 | 18 | 49,570,773 | 49,595,009 | 0 | 0 | 0 | 0 |
| Case 108 | 18 | 49,619,861 | 66,744,308 | 2 | 0 | 2 | 1 |
| Case 108 | 18 | 66,747,568 | 66,755,508 | 0 | 0 | 0 | 0 |
| Case 108 | 18 | 66,758,232 | 78,015,180 | 2 | 0 | 2 | 1 |
| Case 108 | 19 | 260,912    | 24,629,285 | 3 | 0 | 3 | 1 |
| Case 108 | 19 | 27,732,159 | 40,519,935 | 3 | 0 | 3 | 1 |
| Case 108 | 19 | 40,520,457 | 40,521,143 | 2 | 0 | 2 | 1 |
| Case 108 | 19 | 40,521,168 | 58,989,192 | 3 | 0 | 3 | 1 |
| Case 108 | 19 | 58,989,495 | 59,097,160 | 4 | 0 | 4 | 1 |
| Case 108 | 20 | 63,244     | 7,121,672  | 2 | 2 | 4 | 0 |
| Case 108 | 20 | 7,123,361  | 7,326,701  | 3 | 2 | 5 | 0 |
| Case 108 | 20 | 7,353,781  | 14,563,919 | 2 | 2 | 4 | 0 |
| Case 108 | 20 | 14,568,758 | 14,693,089 | 3 | 2 | 5 | 0 |
| Case 108 | 20 | 14,697,386 | 14,890,211 | 2 | 2 | 4 | 0 |
| Case 108 | 20 | 14,899,804 | 14,902,522 | 3 | 0 | 3 | 1 |
| Case 108 | 20 | 14,908,741 | 15,161,670 | 3 | 1 | 4 | 0 |
| Case 108 | 20 | 15,163,265 | 26,293,985 | 2 | 2 | 4 | 0 |
| Case 108 | 20 | 29,425,357 | 43,739,119 | 2 | 2 | 4 | 0 |
| Case 108 | 20 | 43,740,693 | 50,408,481 | 4 | 0 | 4 | 1 |
| Case 108 | 20 | 50,408,486 | 60,890,564 | 2 | 2 | 4 | 0 |
| Case 108 | 20 | 60,890,808 | 60,990,900 | 3 | 2 | 5 | 0 |
| Case 108 | 20 | 60,991,235 | 61,850,563 | 2 | 2 | 4 | 0 |
| Case 108 | 20 | 61,852,629 | 61,879,009 | 3 | 2 | 5 | 0 |
| Case 108 | 20 | 61,879,091 | 62,163,983 | 2 | 2 | 4 | 0 |
| Case 108 | 20 | 62,163,984 | 62,219,740 | 3 | 2 | 5 | 0 |
| Case 108 | 20 | 62,219,837 | 62,948,788 | 2 | 2 | 4 | 0 |
| Case 108 | 21 | 10,827,533 | 10,971,337 | 2 | 0 | 2 | 1 |
| Case 108 | 21 | 14,368,320 | 15,328,333 | 2 | 0 | 2 | 1 |
| Case 108 | 21 | 15,332,033 | 15,515,843 | 3 | 0 | 3 | 1 |
| Case 108 | 21 | 15,516,948 | 15,666,737 | 2 | 0 | 2 | 1 |
| Case 108 | 21 | 15,667,176 | 15,936,503 | 3 | 0 | 3 | 1 |
| Case 108 | 21 | 15,938,358 | 16,010,681 | 2 | 0 | 2 | 1 |
| Case 108 | 21 | 16,012,102 | 17,210,838 | 3 | 0 | 3 | 1 |
| Case 108 | 21 | 17,214,734 | 17,654,621 | 2 | 0 | 2 | 1 |
| Case 108 | 21 | 17,657,785 | 17,693,767 | 3 | 0 | 3 | 1 |
| Case 108 | 21 | 17,693,951 | 18,124,648 | 2 | 0 | 2 | 1 |



|          |    |            |            |   |   |   |   |
|----------|----|------------|------------|---|---|---|---|
| Case 108 | 21 | 18,138,050 | 19,686,578 | 3 | 0 | 3 | 1 |
| Case 108 | 21 | 19,687,498 | 19,783,744 | 2 | 0 | 2 | 1 |
| Case 108 | 21 | 19,784,135 | 19,983,850 | 3 | 0 | 3 | 1 |
| Case 108 | 21 | 19,987,915 | 20,655,418 | 2 | 0 | 2 | 1 |
| Case 108 | 21 | 20,662,610 | 20,725,800 | 3 | 0 | 3 | 1 |
| Case 108 | 21 | 20,733,268 | 20,773,681 | 2 | 0 | 2 | 1 |
| Case 108 | 21 | 20,779,299 | 20,980,675 | 3 | 0 | 3 | 1 |
| Case 108 | 21 | 20,984,026 | 21,302,359 | 2 | 0 | 2 | 1 |
| Case 108 | 21 | 21,304,740 | 21,352,994 | 3 | 0 | 3 | 1 |
| Case 108 | 21 | 21,357,808 | 21,983,931 | 2 | 0 | 2 | 1 |
| Case 108 | 21 | 21,984,599 | 22,090,256 | 3 | 0 | 3 | 1 |
| Case 108 | 21 | 22,094,839 | 22,660,796 | 2 | 0 | 2 | 1 |
| Case 108 | 21 | 22,661,749 | 22,705,794 | 3 | 0 | 3 | 1 |
| Case 108 | 21 | 22,707,887 | 25,914,897 | 2 | 0 | 2 | 1 |
| Case 108 | 21 | 25,918,197 | 26,031,868 | 3 | 0 | 3 | 1 |
| Case 108 | 21 | 26,032,368 | 26,385,726 | 2 | 0 | 2 | 1 |
| Case 108 | 21 | 26,386,200 | 26,940,815 | 3 | 0 | 3 | 1 |
| Case 108 | 21 | 26,950,454 | 26,977,006 | 2 | 0 | 2 | 1 |
| Case 108 | 21 | 26,978,790 | 27,443,650 | 3 | 0 | 3 | 1 |
| Case 108 | 21 | 27,444,110 | 27,643,476 | 2 | 0 | 2 | 1 |
| Case 108 | 21 | 27,644,590 | 28,643,868 | 3 | 0 | 3 | 1 |
| Case 108 | 21 | 28,647,859 | 29,313,666 | 2 | 0 | 2 | 1 |
| Case 108 | 21 | 29,324,934 | 29,871,279 | 3 | 0 | 3 | 1 |
| Case 108 | 21 | 29,873,487 | 30,441,775 | 2 | 0 | 2 | 1 |
| Case 108 | 21 | 30,445,291 | 31,965,059 | 3 | 0 | 3 | 1 |
| Case 108 | 21 | 31,973,405 | 32,250,952 | 2 | 0 | 2 | 1 |
| Case 108 | 21 | 32,251,674 | 32,810,899 | 3 | 0 | 3 | 1 |
| Case 108 | 21 | 32,811,608 | 33,136,524 | 2 | 0 | 2 | 1 |
| Case 108 | 21 | 33,140,026 | 34,003,504 | 3 | 0 | 3 | 1 |
| Case 108 | 21 | 34,003,786 | 34,156,633 | 2 | 0 | 2 | 1 |
| Case 108 | 21 | 34,161,495 | 34,588,494 | 3 | 0 | 3 | 1 |
| Case 108 | 21 | 34,590,090 | 34,726,019 | 2 | 0 | 2 | 1 |
| Case 108 | 21 | 34,727,330 | 34,805,197 | 3 | 0 | 3 | 1 |
| Case 108 | 21 | 34,806,288 | 35,186,357 | 2 | 0 | 2 | 1 |
| Case 108 | 21 | 35,186,743 | 35,260,481 | 3 | 0 | 3 | 1 |
| Case 108 | 21 | 35,265,524 | 35,354,247 | 2 | 0 | 2 | 1 |
| Case 108 | 21 | 35,354,523 | 37,510,224 | 3 | 0 | 3 | 1 |
| Case 108 | 21 | 37,510,738 | 37,554,637 | 2 | 0 | 2 | 1 |
| Case 108 | 21 | 37,557,008 | 37,618,896 | 3 | 0 | 3 | 1 |
| Case 108 | 21 | 37,619,820 | 37,763,352 | 2 | 0 | 2 | 1 |
| Case 108 | 21 | 37,768,962 | 38,390,425 | 3 | 0 | 3 | 1 |
| Case 108 | 21 | 38,390,444 | 38,574,213 | 2 | 0 | 2 | 1 |
| Case 108 | 21 | 38,579,914 | 40,236,810 | 3 | 0 | 3 | 1 |
| Case 108 | 21 | 40,237,762 | 40,271,392 | 2 | 0 | 2 | 1 |
| Case 108 | 21 | 40,275,033 | 40,527,311 | 3 | 0 | 3 | 1 |
| Case 108 | 21 | 40,547,310 | 40,719,027 | 2 | 0 | 2 | 1 |
| Case 108 | 21 | 40,720,261 | 40,780,560 | 3 | 0 | 3 | 1 |
| Case 108 | 21 | 40,781,985 | 40,823,981 | 2 | 0 | 2 | 1 |
| Case 108 | 21 | 40,825,546 | 43,809,044 | 3 | 0 | 3 | 1 |
| Case 108 | 21 | 43,809,080 | 43,824,136 | 2 | 0 | 2 | 1 |
| Case 108 | 21 | 43,825,475 | 47,706,997 | 3 | 0 | 3 | 1 |
| Case 108 | 21 | 47,708,037 | 47,731,391 | 2 | 0 | 2 | 1 |
| Case 108 | 21 | 47,734,659 | 48,100,155 | 3 | 0 | 3 | 1 |
| Case 108 | 22 | 16,114,244 | 51,195,728 | 3 | 0 | 3 | 1 |
| Case 109 | 1  | 82,154     | 9,890,158  | 1 | 1 | 2 | 0 |
| Case 109 | 1  | 9,897,001  | 11,772,411 | 2 | 1 | 3 | 0 |
| Case 109 | 1  | 11,774,956 | 11,846,252 | 3 | 1 | 4 | 0 |
| Case 109 | 1  | 11,847,436 | 14,620,369 | 2 | 1 | 3 | 0 |
| Case 109 | 1  | 14,621,842 | 15,144,305 | 3 | 1 | 4 | 0 |
| Case 109 | 1  | 15,150,914 | 15,405,489 | 2 | 1 | 3 | 0 |
| Case 109 | 1  | 15,406,696 | 15,466,832 | 3 | 1 | 4 | 0 |

|          |   |             |             |   |   |   |   |
|----------|---|-------------|-------------|---|---|---|---|
| Case 109 | 1 | 15,467,263  | 16,069,612  | 2 | 1 | 3 | 0 |
| Case 109 | 1 | 16,069,644  | 16,122,018  | 3 | 1 | 4 | 0 |
| Case 109 | 1 | 16,123,199  | 16,475,419  | 2 | 1 | 3 | 0 |
| Case 109 | 1 | 16,477,423  | 27,272,844  | 1 | 1 | 2 | 0 |
| Case 109 | 1 | 27,272,864  | 27,877,845  | 1 | 0 | 1 | 0 |
| Case 109 | 1 | 27,878,157  | 43,353,134  | 1 | 1 | 2 | 0 |
| Case 109 | 1 | 43,356,211  | 43,557,168  | 2 | 1 | 3 | 0 |
| Case 109 | 1 | 43,565,492  | 47,098,108  | 1 | 1 | 2 | 0 |
| Case 109 | 1 | 47,099,346  | 47,121,502  | 1 | 0 | 1 | 0 |
| Case 109 | 1 | 47,138,637  | 121,251,086 | 1 | 1 | 2 | 0 |
| Case 109 | 1 | 121,280,613 | 121,346,616 | 2 | 1 | 3 | 0 |
| Case 109 | 1 | 142,649,718 | 146,686,372 | 2 | 1 | 3 | 0 |
| Case 109 | 1 | 146,686,649 | 147,365,037 | 3 | 1 | 4 | 0 |
| Case 109 | 1 | 147,367,541 | 152,329,952 | 2 | 1 | 3 | 0 |
| Case 109 | 1 | 152,331,240 | 152,732,174 | 3 | 1 | 4 | 0 |
| Case 109 | 1 | 152,732,299 | 152,773,905 | 2 | 1 | 3 | 0 |
| Case 109 | 1 | 152,777,465 | 153,303,326 | 3 | 1 | 4 | 0 |
| Case 109 | 1 | 153,303,392 | 154,325,302 | 2 | 1 | 3 | 0 |
| Case 109 | 1 | 154,326,279 | 154,400,015 | 3 | 1 | 4 | 0 |
| Case 109 | 1 | 154,401,679 | 154,437,801 | 2 | 1 | 3 | 0 |
| Case 109 | 1 | 154,437,896 | 154,480,318 | 3 | 1 | 4 | 0 |
| Case 109 | 1 | 154,480,485 | 154,626,705 | 2 | 1 | 3 | 0 |
| Case 109 | 1 | 154,630,498 | 154,810,030 | 3 | 1 | 4 | 0 |
| Case 109 | 1 | 154,811,127 | 155,114,683 | 2 | 1 | 3 | 0 |
| Case 109 | 1 | 155,122,783 | 155,140,648 | 3 | 1 | 4 | 0 |
| Case 109 | 1 | 155,143,946 | 156,351,895 | 2 | 1 | 3 | 0 |
| Case 109 | 1 | 156,352,396 | 156,374,256 | 3 | 1 | 4 | 0 |
| Case 109 | 1 | 156,377,693 | 156,972,485 | 2 | 1 | 3 | 0 |
| Case 109 | 1 | 156,992,753 | 157,508,906 | 3 | 1 | 4 | 0 |
| Case 109 | 1 | 157,508,908 | 157,830,947 | 2 | 1 | 3 | 0 |
| Case 109 | 1 | 157,832,074 | 158,057,691 | 3 | 1 | 4 | 0 |
| Case 109 | 1 | 158,058,109 | 158,725,387 | 2 | 1 | 3 | 0 |
| Case 109 | 1 | 158,725,419 | 159,749,188 | 3 | 1 | 4 | 0 |
| Case 109 | 1 | 159,750,629 | 160,806,025 | 2 | 1 | 3 | 0 |
| Case 109 | 1 | 160,807,409 | 161,011,931 | 3 | 1 | 4 | 0 |
| Case 109 | 1 | 161,012,448 | 161,647,270 | 2 | 1 | 3 | 0 |
| Case 109 | 1 | 161,653,708 | 162,456,008 | 3 | 1 | 4 | 0 |
| Case 109 | 1 | 162,458,412 | 162,776,137 | 2 | 1 | 3 | 0 |
| Case 109 | 1 | 162,781,787 | 165,497,692 | 3 | 1 | 4 | 0 |
| Case 109 | 1 | 165,502,862 | 165,811,729 | 2 | 1 | 3 | 0 |
| Case 109 | 1 | 165,812,120 | 167,016,853 | 3 | 1 | 4 | 0 |
| Case 109 | 1 | 167,016,898 | 167,102,492 | 2 | 1 | 3 | 0 |
| Case 109 | 1 | 167,103,023 | 167,777,989 | 3 | 1 | 4 | 0 |
| Case 109 | 1 | 167,778,843 | 167,946,764 | 2 | 1 | 3 | 0 |
| Case 109 | 1 | 167,961,235 | 169,068,156 | 3 | 1 | 4 | 0 |
| Case 109 | 1 | 169,070,332 | 169,586,946 | 2 | 1 | 3 | 0 |
| Case 109 | 1 | 169,587,032 | 169,773,317 | 3 | 1 | 4 | 0 |
| Case 109 | 1 | 169,773,337 | 170,171,083 | 2 | 1 | 3 | 0 |
| Case 109 | 1 | 170,171,258 | 170,901,445 | 3 | 1 | 4 | 0 |
| Case 109 | 1 | 170,903,771 | 171,086,513 | 2 | 1 | 3 | 0 |
| Case 109 | 1 | 171,087,660 | 171,164,565 | 3 | 1 | 4 | 0 |
| Case 109 | 1 | 171,166,532 | 171,231,635 | 2 | 1 | 3 | 0 |
| Case 109 | 1 | 171,232,213 | 171,499,108 | 3 | 1 | 4 | 0 |
| Case 109 | 1 | 171,500,154 | 171,537,387 | 2 | 1 | 3 | 0 |
| Case 109 | 1 | 171,543,476 | 171,743,575 | 3 | 1 | 4 | 0 |
| Case 109 | 1 | 171,743,865 | 172,101,666 | 2 | 1 | 3 | 0 |
| Case 109 | 1 | 172,106,806 | 173,494,019 | 3 | 1 | 4 | 0 |
| Case 109 | 1 | 173,494,045 | 175,097,769 | 2 | 1 | 3 | 0 |
| Case 109 | 1 | 175,097,863 | 175,324,651 | 3 | 1 | 4 | 0 |
| Case 109 | 1 | 175,325,205 | 176,863,867 | 2 | 1 | 3 | 0 |
| Case 109 | 1 | 176,867,860 | 179,075,755 | 3 | 1 | 4 | 0 |

|          |   |             |             |   |   |   |   |
|----------|---|-------------|-------------|---|---|---|---|
| Case 109 | 1 | 179,077,109 | 179,100,545 | 2 | 1 | 3 | 0 |
| Case 109 | 1 | 179,100,604 | 179,787,027 | 3 | 1 | 4 | 0 |
| Case 109 | 1 | 179,788,333 | 180,567,428 | 2 | 1 | 3 | 0 |
| Case 109 | 1 | 180,567,596 | 181,002,768 | 3 | 1 | 4 | 0 |
| Case 109 | 1 | 181,003,160 | 181,296,112 | 2 | 1 | 3 | 0 |
| Case 109 | 1 | 181,296,409 | 181,513,867 | 3 | 1 | 4 | 0 |
| Case 109 | 1 | 181,516,101 | 181,594,465 | 2 | 1 | 3 | 0 |
| Case 109 | 1 | 181,595,979 | 181,741,301 | 3 | 1 | 4 | 0 |
| Case 109 | 1 | 181,753,030 | 182,252,309 | 2 | 1 | 3 | 0 |
| Case 109 | 1 | 182,256,110 | 182,499,457 | 3 | 1 | 4 | 0 |
| Case 109 | 1 | 182,499,943 | 183,687,038 | 2 | 1 | 3 | 0 |
| Case 109 | 1 | 183,696,656 | 185,119,609 | 3 | 1 | 4 | 0 |
| Case 109 | 1 | 185,121,752 | 186,344,126 | 2 | 1 | 3 | 0 |
| Case 109 | 1 | 186,345,281 | 197,063,292 | 3 | 1 | 4 | 0 |
| Case 109 | 1 | 197,065,186 | 197,123,043 | 2 | 1 | 3 | 0 |
| Case 109 | 1 | 197,124,680 | 200,080,463 | 3 | 1 | 4 | 0 |
| Case 109 | 1 | 200,083,654 | 201,075,245 | 2 | 1 | 3 | 0 |
| Case 109 | 1 | 201,075,796 | 201,108,096 | 3 | 1 | 4 | 0 |
| Case 109 | 1 | 201,108,503 | 201,182,386 | 2 | 1 | 3 | 0 |
| Case 109 | 1 | 201,182,440 | 201,185,842 | 3 | 1 | 4 | 0 |
| Case 109 | 1 | 201,185,862 | 201,354,891 | 2 | 1 | 3 | 0 |
| Case 109 | 1 | 201,355,522 | 201,419,375 | 3 | 1 | 4 | 0 |
| Case 109 | 1 | 201,420,589 | 201,504,189 | 2 | 1 | 3 | 0 |
| Case 109 | 1 | 201,517,349 | 201,742,519 | 3 | 1 | 4 | 0 |
| Case 109 | 1 | 201,746,239 | 201,884,668 | 2 | 1 | 3 | 0 |
| Case 109 | 1 | 201,886,402 | 202,193,981 | 3 | 1 | 4 | 0 |
| Case 109 | 1 | 202,197,082 | 202,547,101 | 2 | 1 | 3 | 0 |
| Case 109 | 1 | 202,550,272 | 202,923,178 | 3 | 1 | 4 | 0 |
| Case 109 | 1 | 202,925,256 | 203,186,963 | 2 | 1 | 3 | 0 |
| Case 109 | 1 | 203,186,964 | 203,443,466 | 3 | 1 | 4 | 0 |
| Case 109 | 1 | 203,444,384 | 203,964,132 | 2 | 1 | 3 | 0 |
| Case 109 | 1 | 203,967,091 | 204,282,936 | 3 | 1 | 4 | 0 |
| Case 109 | 1 | 204,283,820 | 204,589,150 | 2 | 1 | 3 | 0 |
| Case 109 | 1 | 204,595,203 | 204,905,920 | 3 | 1 | 4 | 0 |
| Case 109 | 1 | 204,906,922 | 205,318,321 | 2 | 1 | 3 | 0 |
| Case 109 | 1 | 205,318,452 | 205,459,889 | 3 | 1 | 4 | 0 |
| Case 109 | 1 | 205,461,250 | 206,681,383 | 2 | 1 | 3 | 0 |
| Case 109 | 1 | 206,684,977 | 206,784,809 | 3 | 1 | 4 | 0 |
| Case 109 | 1 | 206,788,458 | 208,569,243 | 2 | 1 | 3 | 0 |
| Case 109 | 1 | 208,578,200 | 209,336,246 | 3 | 1 | 4 | 0 |
| Case 109 | 1 | 209,337,763 | 209,605,611 | 2 | 1 | 3 | 0 |
| Case 109 | 1 | 209,608,020 | 209,723,420 | 3 | 1 | 4 | 0 |
| Case 109 | 1 | 209,728,590 | 209,807,952 | 2 | 1 | 3 | 0 |
| Case 109 | 1 | 209,811,293 | 209,955,848 | 3 | 1 | 4 | 0 |
| Case 109 | 1 | 209,956,402 | 210,019,824 | 2 | 1 | 3 | 0 |
| Case 109 | 1 | 210,020,971 | 210,389,417 | 3 | 1 | 4 | 0 |
| Case 109 | 1 | 210,394,270 | 210,459,159 | 2 | 1 | 3 | 0 |
| Case 109 | 1 | 210,460,602 | 211,203,217 | 3 | 1 | 4 | 0 |
| Case 109 | 1 | 211,208,401 | 212,639,003 | 2 | 1 | 3 | 0 |
| Case 109 | 1 | 212,640,367 | 212,780,471 | 3 | 1 | 4 | 0 |
| Case 109 | 1 | 212,782,500 | 212,799,684 | 2 | 1 | 3 | 0 |
| Case 109 | 1 | 212,799,870 | 212,885,805 | 3 | 1 | 4 | 0 |
| Case 109 | 1 | 212,887,790 | 214,242,637 | 2 | 1 | 3 | 0 |
| Case 109 | 1 | 214,268,998 | 214,763,986 | 3 | 1 | 4 | 0 |
| Case 109 | 1 | 214,770,895 | 214,820,494 | 2 | 1 | 3 | 0 |
| Case 109 | 1 | 214,820,524 | 215,799,170 | 3 | 1 | 4 | 0 |
| Case 109 | 1 | 215,802,169 | 215,848,910 | 2 | 1 | 3 | 0 |
| Case 109 | 1 | 215,848,921 | 216,172,258 | 3 | 1 | 4 | 0 |
| Case 109 | 1 | 216,172,296 | 216,517,635 | 2 | 1 | 3 | 0 |
| Case 109 | 1 | 216,521,091 | 219,968,010 | 3 | 1 | 4 | 0 |
| Case 109 | 1 | 219,968,306 | 220,495,396 | 2 | 1 | 3 | 0 |

|          |   |             |             |   |   |   |   |
|----------|---|-------------|-------------|---|---|---|---|
| Case 109 | 1 | 220,496,232 | 220,970,031 | 3 | 1 | 4 | 0 |
| Case 109 | 1 | 220,970,070 | 221,082,107 | 2 | 1 | 3 | 0 |
| Case 109 | 1 | 221,084,222 | 221,396,325 | 3 | 1 | 4 | 0 |
| Case 109 | 1 | 221,397,750 | 221,958,998 | 4 | 1 | 5 | 0 |
| Case 109 | 1 | 221,966,781 | 222,562,019 | 3 | 1 | 4 | 0 |
| Case 109 | 1 | 222,574,834 | 222,920,393 | 2 | 1 | 3 | 0 |
| Case 109 | 1 | 222,920,400 | 223,177,522 | 3 | 1 | 4 | 0 |
| Case 109 | 1 | 223,177,948 | 223,310,048 | 2 | 1 | 3 | 0 |
| Case 109 | 1 | 223,311,607 | 223,917,907 | 3 | 1 | 4 | 0 |
| Case 109 | 1 | 223,924,236 | 224,009,058 | 2 | 1 | 3 | 0 |
| Case 109 | 1 | 224,021,459 | 224,494,670 | 3 | 1 | 4 | 0 |
| Case 109 | 1 | 224,495,698 | 224,720,286 | 2 | 1 | 3 | 0 |
| Case 109 | 1 | 224,726,060 | 225,540,100 | 3 | 1 | 4 | 0 |
| Case 109 | 1 | 225,548,126 | 226,752,447 | 2 | 1 | 3 | 0 |
| Case 109 | 1 | 226,755,701 | 227,069,693 | 3 | 1 | 4 | 0 |
| Case 109 | 1 | 227,069,708 | 227,174,370 | 2 | 1 | 3 | 0 |
| Case 109 | 1 | 227,174,902 | 227,677,506 | 3 | 1 | 4 | 0 |
| Case 109 | 1 | 227,696,594 | 227,954,701 | 2 | 1 | 3 | 0 |
| Case 109 | 1 | 227,954,716 | 228,227,477 | 3 | 1 | 4 | 0 |
| Case 109 | 1 | 228,229,067 | 228,503,592 | 2 | 1 | 3 | 0 |
| Case 109 | 1 | 228,503,679 | 228,593,222 | 3 | 1 | 4 | 0 |
| Case 109 | 1 | 228,596,036 | 229,004,119 | 2 | 1 | 3 | 0 |
| Case 109 | 1 | 229,004,264 | 229,566,362 | 3 | 1 | 4 | 0 |
| Case 109 | 1 | 229,571,061 | 230,122,064 | 2 | 1 | 3 | 0 |
| Case 109 | 1 | 230,130,480 | 230,445,193 | 3 | 1 | 4 | 0 |
| Case 109 | 1 | 230,445,698 | 230,535,966 | 2 | 1 | 3 | 0 |
| Case 109 | 1 | 230,551,909 | 230,704,291 | 3 | 1 | 4 | 0 |
| Case 109 | 1 | 230,706,868 | 230,840,016 | 2 | 1 | 3 | 0 |
| Case 109 | 1 | 230,840,034 | 230,849,872 | 3 | 1 | 4 | 0 |
| Case 109 | 1 | 230,850,018 | 230,984,594 | 2 | 1 | 3 | 0 |
| Case 109 | 1 | 230,988,920 | 232,090,493 | 3 | 1 | 4 | 0 |
| Case 109 | 1 | 232,090,932 | 232,312,643 | 2 | 1 | 3 | 0 |
| Case 109 | 1 | 232,314,505 | 232,576,594 | 3 | 1 | 4 | 0 |
| Case 109 | 1 | 232,577,098 | 233,398,867 | 2 | 1 | 3 | 0 |
| Case 109 | 1 | 233,398,893 | 234,883,182 | 3 | 1 | 4 | 0 |
| Case 109 | 1 | 234,886,224 | 236,066,991 | 2 | 1 | 3 | 0 |
| Case 109 | 1 | 236,070,001 | 236,105,308 | 3 | 1 | 4 | 0 |
| Case 109 | 1 | 236,109,373 | 236,228,164 | 2 | 1 | 3 | 0 |
| Case 109 | 1 | 236,228,234 | 236,898,035 | 3 | 1 | 4 | 0 |
| Case 109 | 1 | 236,898,163 | 237,107,519 | 2 | 1 | 3 | 0 |
| Case 109 | 1 | 237,110,626 | 237,815,546 | 3 | 1 | 4 | 0 |
| Case 109 | 1 | 237,819,215 | 238,053,787 | 2 | 1 | 3 | 0 |
| Case 109 | 1 | 238,053,817 | 240,303,322 | 3 | 1 | 4 | 0 |
| Case 109 | 1 | 240,305,244 | 240,505,407 | 2 | 1 | 3 | 0 |
| Case 109 | 1 | 240,507,412 | 241,168,080 | 3 | 1 | 4 | 0 |
| Case 109 | 1 | 241,168,535 | 242,094,314 | 2 | 1 | 3 | 0 |
| Case 109 | 1 | 242,096,551 | 243,617,188 | 3 | 1 | 4 | 0 |
| Case 109 | 1 | 243,620,120 | 244,015,993 | 2 | 1 | 3 | 0 |
| Case 109 | 1 | 244,023,667 | 244,316,996 | 3 | 1 | 4 | 0 |
| Case 109 | 1 | 244,319,340 | 244,778,230 | 2 | 1 | 3 | 0 |
| Case 109 | 1 | 244,782,870 | 244,980,554 | 3 | 1 | 4 | 0 |
| Case 109 | 1 | 244,981,463 | 245,636,915 | 2 | 1 | 3 | 0 |
| Case 109 | 1 | 245,637,039 | 245,773,041 | 3 | 1 | 4 | 0 |
| Case 109 | 1 | 245,773,223 | 246,116,352 | 2 | 1 | 3 | 0 |
| Case 109 | 1 | 246,117,191 | 246,457,214 | 3 | 1 | 4 | 0 |
| Case 109 | 1 | 246,465,955 | 247,371,918 | 2 | 1 | 3 | 0 |
| Case 109 | 1 | 247,372,163 | 247,578,441 | 3 | 1 | 4 | 0 |
| Case 109 | 1 | 247,579,435 | 247,653,624 | 2 | 1 | 3 | 0 |
| Case 109 | 1 | 247,654,439 | 247,655,102 | 1 | 0 | 1 | 0 |
| Case 109 | 1 | 247,655,270 | 247,703,769 | 2 | 1 | 3 | 0 |
| Case 109 | 1 | 247,710,624 | 247,751,731 | 3 | 1 | 4 | 0 |

|          |   |             |             |   |   |   |   |
|----------|---|-------------|-------------|---|---|---|---|
| Case 109 | 1 | 247,751,897 | 249,218,992 | 2 | 1 | 3 | 0 |
| Case 109 | 2 | 18,674      | 38,703,619  | 1 | 1 | 2 | 0 |
| Case 109 | 2 | 38,704,658  | 38,845,701  | 2 | 1 | 3 | 0 |
| Case 109 | 2 | 38,847,132  | 38,932,777  | 1 | 1 | 2 | 0 |
| Case 109 | 2 | 38,936,539  | 39,103,991  | 2 | 1 | 3 | 0 |
| Case 109 | 2 | 39,105,781  | 51,675,468  | 3 | 1 | 4 | 0 |
| Case 109 | 2 | 51,676,835  | 51,736,994  | 2 | 2 | 4 | 0 |
| Case 109 | 2 | 51,738,393  | 52,458,725  | 4 | 1 | 5 | 0 |
| Case 109 | 2 | 52,461,739  | 52,461,739  | 2 | 2 | 4 | 0 |
| Case 109 | 2 | 52,461,984  | 52,659,874  | 2 | 1 | 3 | 0 |
| Case 109 | 2 | 52,668,651  | 53,099,305  | 3 | 1 | 4 | 0 |
| Case 109 | 2 | 53,101,066  | 64,928,603  | 2 | 1 | 3 | 0 |
| Case 109 | 2 | 64,936,472  | 65,215,030  | 3 | 1 | 4 | 0 |
| Case 109 | 2 | 65,216,817  | 92,081,640  | 2 | 1 | 3 | 0 |
| Case 109 | 2 | 95,429,424  | 243,048,760 | 2 | 1 | 3 | 0 |
| Case 109 | 3 | 61,495      | 21,278,077  | 2 | 1 | 3 | 0 |
| Case 109 | 3 | 21,280,306  | 30,211,349  | 1 | 1 | 2 | 0 |
| Case 109 | 3 | 30,225,323  | 30,547,439  | 2 | 1 | 3 | 0 |
| Case 109 | 3 | 30,549,626  | 45,153,422  | 1 | 1 | 2 | 0 |
| Case 109 | 3 | 45,153,626  | 45,429,891  | 2 | 1 | 3 | 0 |
| Case 109 | 3 | 45,436,093  | 59,898,057  | 1 | 1 | 2 | 0 |
| Case 109 | 3 | 59,898,962  | 59,938,447  | 1 | 0 | 1 | 0 |
| Case 109 | 3 | 59,939,093  | 60,059,041  | 2 | 0 | 2 | 1 |
| Case 109 | 3 | 60,062,400  | 60,248,418  | 1 | 0 | 1 | 0 |
| Case 109 | 3 | 60,252,827  | 60,439,043  | 1 | 1 | 2 | 0 |
| Case 109 | 3 | 60,441,079  | 60,461,994  | 1 | 0 | 1 | 0 |
| Case 109 | 3 | 60,464,275  | 60,484,433  | 0 | 0 | 0 | 0 |
| Case 109 | 3 | 60,487,074  | 60,554,521  | 1 | 0 | 1 | 0 |
| Case 109 | 3 | 60,557,685  | 60,589,410  | 0 | 0 | 0 | 0 |
| Case 109 | 3 | 60,591,506  | 60,626,006  | 1 | 0 | 1 | 0 |
| Case 109 | 3 | 60,630,360  | 61,577,341  | 1 | 1 | 2 | 0 |
| Case 109 | 3 | 61,584,646  | 61,628,388  | 2 | 1 | 3 | 0 |
| Case 109 | 3 | 61,632,170  | 90,442,925  | 1 | 1 | 2 | 0 |
| Case 109 | 3 | 93,537,290  | 148,962,041 | 1 | 1 | 2 | 0 |
| Case 109 | 3 | 148,964,692 | 148,967,335 | 0 | 0 | 0 | 0 |
| Case 109 | 3 | 148,973,465 | 197,838,262 | 1 | 1 | 2 | 0 |
| Case 109 | 4 | 71,566      | 2,990,375   | 2 | 0 | 2 | 1 |
| Case 109 | 4 | 2,990,487   | 25,707,422  | 2 | 1 | 3 | 0 |
| Case 109 | 4 | 25,717,754  | 25,734,246  | 1 | 0 | 1 | 0 |
| Case 109 | 4 | 25,740,206  | 49,620,898  | 2 | 1 | 3 | 0 |
| Case 109 | 4 | 52,697,856  | 75,309,469  | 2 | 1 | 3 | 0 |
| Case 109 | 4 | 75,324,290  | 75,738,792  | 3 | 1 | 4 | 0 |
| Case 109 | 4 | 75,745,515  | 95,514,609  | 2 | 1 | 3 | 0 |
| Case 109 | 4 | 95,525,186  | 99,027,159  | 1 | 1 | 2 | 0 |
| Case 109 | 4 | 99,027,184  | 101,250,176 | 2 | 1 | 3 | 0 |
| Case 109 | 4 | 101,251,778 | 122,933,691 | 1 | 1 | 2 | 0 |
| Case 109 | 4 | 122,947,939 | 152,114,234 | 2 | 1 | 3 | 0 |
| Case 109 | 4 | 152,144,869 | 152,557,786 | 1 | 0 | 1 | 0 |
| Case 109 | 4 | 152,567,239 | 152,701,085 | 2 | 0 | 2 | 1 |
| Case 109 | 4 | 152,701,656 | 161,856,343 | 1 | 0 | 1 | 0 |
| Case 109 | 4 | 161,861,640 | 161,924,832 | 3 | 0 | 3 | 1 |
| Case 109 | 4 | 161,935,342 | 164,387,952 | 1 | 0 | 1 | 0 |
| Case 109 | 4 | 164,389,550 | 164,394,765 | 2 | 0 | 2 | 1 |
| Case 109 | 4 | 164,396,241 | 169,425,339 | 1 | 0 | 1 | 0 |
| Case 109 | 4 | 169,425,778 | 169,459,736 | 2 | 0 | 2 | 1 |
| Case 109 | 4 | 169,474,972 | 169,592,669 | 1 | 0 | 1 | 0 |
| Case 109 | 4 | 169,595,421 | 169,618,568 | 2 | 0 | 2 | 1 |
| Case 109 | 4 | 169,622,650 | 172,699,232 | 1 | 0 | 1 | 0 |
| Case 109 | 4 | 172,705,236 | 183,124,933 | 2 | 0 | 2 | 1 |
| Case 109 | 4 | 183,125,630 | 184,928,980 | 1 | 0 | 1 | 0 |
| Case 109 | 4 | 184,930,646 | 184,938,306 | 2 | 0 | 2 | 1 |

|          |   |             |             |   |   |   |   |
|----------|---|-------------|-------------|---|---|---|---|
| Case 109 | 4 | 184,938,360 | 185,116,224 | 1 | 0 | 1 | 0 |
| Case 109 | 4 | 185,117,077 | 185,160,596 | 2 | 0 | 2 | 1 |
| Case 109 | 4 | 185,162,040 | 185,310,015 | 1 | 0 | 1 | 0 |
| Case 109 | 4 | 185,310,218 | 185,436,378 | 2 | 0 | 2 | 1 |
| Case 109 | 4 | 185,440,669 | 185,698,094 | 1 | 0 | 1 | 0 |
| Case 109 | 4 | 185,700,776 | 185,940,205 | 2 | 0 | 2 | 1 |
| Case 109 | 4 | 185,940,785 | 187,509,492 | 1 | 0 | 1 | 0 |
| Case 109 | 4 | 187,509,760 | 187,525,020 | 2 | 0 | 2 | 1 |
| Case 109 | 4 | 187,525,083 | 187,539,125 | 1 | 0 | 1 | 0 |
| Case 109 | 4 | 187,539,205 | 187,542,201 | 2 | 0 | 2 | 1 |
| Case 109 | 4 | 187,542,316 | 187,586,210 | 1 | 0 | 1 | 0 |
| Case 109 | 4 | 187,587,980 | 187,630,905 | 2 | 0 | 2 | 1 |
| Case 109 | 4 | 187,630,998 | 189,007,284 | 1 | 0 | 1 | 0 |
| Case 109 | 4 | 189,010,521 | 189,013,081 | 2 | 0 | 2 | 1 |
| Case 109 | 4 | 189,018,613 | 190,876,192 | 1 | 0 | 1 | 0 |
| Case 109 | 4 | 190,876,268 | 190,963,766 | 2 | 0 | 2 | 1 |
| Case 109 | 5 | 38,139      | 497,277     | 2 | 1 | 3 | 0 |
| Case 109 | 5 | 499,071     | 595,870     | 3 | 1 | 4 | 0 |
| Case 109 | 5 | 598,237     | 1,027,182   | 2 | 1 | 3 | 0 |
| Case 109 | 5 | 1,032,032   | 1,065,399   | 1 | 1 | 2 | 0 |
| Case 109 | 5 | 1,065,424   | 6,604,787   | 2 | 1 | 3 | 0 |
| Case 109 | 5 | 6,607,370   | 6,785,435   | 1 | 1 | 2 | 0 |
| Case 109 | 5 | 6,786,308   | 9,078,628   | 2 | 1 | 3 | 0 |
| Case 109 | 5 | 9,087,921   | 9,985,893   | 1 | 1 | 2 | 0 |
| Case 109 | 5 | 9,987,380   | 10,264,788  | 2 | 1 | 3 | 0 |
| Case 109 | 5 | 10,265,277  | 10,492,322  | 1 | 1 | 2 | 0 |
| Case 109 | 5 | 10,496,509  | 12,995,938  | 2 | 1 | 3 | 0 |
| Case 109 | 5 | 13,013,974  | 15,904,024  | 1 | 1 | 2 | 0 |
| Case 109 | 5 | 15,913,112  | 19,393,347  | 2 | 1 | 3 | 0 |
| Case 109 | 5 | 19,393,903  | 20,779,048  | 1 | 1 | 2 | 0 |
| Case 109 | 5 | 20,786,582  | 25,700,070  | 2 | 1 | 3 | 0 |
| Case 109 | 5 | 25,700,355  | 28,549,181  | 1 | 1 | 2 | 0 |
| Case 109 | 5 | 28,560,977  | 36,781,359  | 2 | 1 | 3 | 0 |
| Case 109 | 5 | 36,786,516  | 37,193,343  | 3 | 1 | 4 | 0 |
| Case 109 | 5 | 37,196,028  | 37,294,496  | 2 | 1 | 3 | 0 |
| Case 109 | 5 | 37,303,392  | 38,261,117  | 1 | 1 | 2 | 0 |
| Case 109 | 5 | 38,261,833  | 39,770,956  | 2 | 1 | 3 | 0 |
| Case 109 | 5 | 39,780,202  | 40,098,605  | 1 | 1 | 2 | 0 |
| Case 109 | 5 | 40,121,487  | 40,195,443  | 2 | 1 | 3 | 0 |
| Case 109 | 5 | 40,203,232  | 40,649,263  | 1 | 1 | 2 | 0 |
| Case 109 | 5 | 40,662,257  | 41,564,562  | 2 | 1 | 3 | 0 |
| Case 109 | 5 | 41,572,722  | 42,610,409  | 3 | 1 | 4 | 0 |
| Case 109 | 5 | 42,617,492  | 42,801,268  | 2 | 1 | 3 | 0 |
| Case 109 | 5 | 42,801,363  | 46,399,093  | 3 | 1 | 4 | 0 |
| Case 109 | 5 | 49,457,282  | 50,635,643  | 1 | 0 | 1 | 0 |
| Case 109 | 5 | 50,636,521  | 50,704,234  | 2 | 0 | 2 | 1 |
| Case 109 | 5 | 50,710,018  | 51,956,733  | 1 | 0 | 1 | 0 |
| Case 109 | 5 | 51,956,999  | 52,051,514  | 2 | 0 | 2 | 1 |
| Case 109 | 5 | 52,064,075  | 52,249,476  | 1 | 0 | 1 | 0 |
| Case 109 | 5 | 52,252,191  | 52,319,076  | 2 | 0 | 2 | 1 |
| Case 109 | 5 | 52,321,039  | 54,516,531  | 1 | 0 | 1 | 0 |
| Case 109 | 5 | 54,518,687  | 54,527,316  | 2 | 0 | 2 | 1 |
| Case 109 | 5 | 54,527,466  | 55,178,747  | 1 | 0 | 1 | 0 |
| Case 109 | 5 | 55,178,963  | 55,236,367  | 2 | 0 | 2 | 1 |
| Case 109 | 5 | 55,236,374  | 55,738,764  | 1 | 0 | 1 | 0 |
| Case 109 | 5 | 55,740,340  | 55,782,130  | 2 | 0 | 2 | 1 |
| Case 109 | 5 | 55,786,198  | 56,721,619  | 1 | 0 | 1 | 0 |
| Case 109 | 5 | 56,727,379  | 56,951,744  | 2 | 0 | 2 | 1 |
| Case 109 | 5 | 56,952,654  | 57,133,250  | 1 | 0 | 1 | 0 |
| Case 109 | 5 | 57,136,991  | 57,235,886  | 2 | 0 | 2 | 1 |
| Case 109 | 5 | 57,244,070  | 60,857,714  | 1 | 0 | 1 | 0 |

|          |   |             |             |   |   |   |   |
|----------|---|-------------|-------------|---|---|---|---|
| Case 109 | 5 | 60,858,429  | 60,928,771  | 2 | 0 | 2 | 1 |
| Case 109 | 5 | 60,933,255  | 61,750,357  | 1 | 0 | 1 | 0 |
| Case 109 | 5 | 61,769,985  | 61,832,574  | 0 | 0 | 0 | 0 |
| Case 109 | 5 | 61,854,650  | 72,466,319  | 1 | 0 | 1 | 0 |
| Case 109 | 5 | 72,467,952  | 72,496,179  | 2 | 0 | 2 | 1 |
| Case 109 | 5 | 72,501,096  | 73,098,324  | 1 | 0 | 1 | 0 |
| Case 109 | 5 | 73,099,158  | 73,121,096  | 2 | 0 | 2 | 1 |
| Case 109 | 5 | 73,125,146  | 73,539,736  | 1 | 0 | 1 | 0 |
| Case 109 | 5 | 73,542,940  | 73,548,364  | 3 | 0 | 3 | 1 |
| Case 109 | 5 | 73,554,344  | 79,354,560  | 1 | 0 | 1 | 0 |
| Case 109 | 5 | 79,355,559  | 79,372,721  | 2 | 0 | 2 | 1 |
| Case 109 | 5 | 79,373,803  | 121,487,789 | 1 | 0 | 1 | 0 |
| Case 109 | 5 | 121,487,823 | 121,488,667 | 2 | 0 | 2 | 1 |
| Case 109 | 5 | 121,489,122 | 122,418,806 | 1 | 0 | 1 | 0 |
| Case 109 | 5 | 122,420,169 | 122,454,305 | 2 | 0 | 2 | 1 |
| Case 109 | 5 | 122,454,550 | 131,312,380 | 1 | 0 | 1 | 0 |
| Case 109 | 5 | 131,316,164 | 131,398,717 | 2 | 0 | 2 | 1 |
| Case 109 | 5 | 131,405,027 | 132,579,659 | 1 | 0 | 1 | 0 |
| Case 109 | 5 | 132,580,990 | 132,742,865 | 2 | 0 | 2 | 1 |
| Case 109 | 5 | 132,744,119 | 133,089,667 | 1 | 0 | 1 | 0 |
| Case 109 | 5 | 133,089,768 | 133,164,490 | 2 | 0 | 2 | 1 |
| Case 109 | 5 | 133,164,640 | 133,201,441 | 1 | 0 | 1 | 0 |
| Case 109 | 5 | 133,202,612 | 133,481,435 | 2 | 0 | 2 | 1 |
| Case 109 | 5 | 133,481,467 | 133,903,814 | 1 | 0 | 1 | 0 |
| Case 109 | 5 | 133,906,527 | 133,930,528 | 2 | 0 | 2 | 1 |
| Case 109 | 5 | 133,942,478 | 134,305,197 | 1 | 0 | 1 | 0 |
| Case 109 | 5 | 134,305,646 | 134,608,010 | 2 | 0 | 2 | 1 |
| Case 109 | 5 | 134,609,822 | 134,871,301 | 1 | 0 | 1 | 0 |
| Case 109 | 5 | 134,871,338 | 134,939,990 | 2 | 0 | 2 | 1 |
| Case 109 | 5 | 134,942,818 | 136,443,115 | 1 | 0 | 1 | 0 |
| Case 109 | 5 | 136,444,759 | 136,772,683 | 2 | 0 | 2 | 1 |
| Case 109 | 5 | 136,774,006 | 139,060,631 | 1 | 0 | 1 | 0 |
| Case 109 | 5 | 139,063,728 | 139,295,821 | 2 | 0 | 2 | 1 |
| Case 109 | 5 | 139,303,341 | 139,920,965 | 1 | 0 | 1 | 0 |
| Case 109 | 5 | 139,921,770 | 139,930,736 | 1 | 1 | 2 | 0 |
| Case 109 | 5 | 139,931,384 | 139,931,740 | 0 | 0 | 0 | 0 |
| Case 109 | 5 | 139,936,760 | 140,214,045 | 1 | 0 | 1 | 0 |
| Case 109 | 5 | 140,214,107 | 140,230,533 | 2 | 0 | 2 | 1 |
| Case 109 | 5 | 140,230,548 | 140,304,934 | 1 | 0 | 1 | 0 |
| Case 109 | 5 | 140,306,489 | 140,308,333 | 2 | 0 | 2 | 1 |
| Case 109 | 5 | 140,308,591 | 140,528,906 | 1 | 0 | 1 | 0 |
| Case 109 | 5 | 140,529,711 | 140,553,663 | 2 | 0 | 2 | 1 |
| Case 109 | 5 | 140,553,664 | 140,589,416 | 1 | 0 | 1 | 0 |
| Case 109 | 5 | 140,589,449 | 140,595,905 | 2 | 0 | 2 | 1 |
| Case 109 | 5 | 140,596,018 | 140,711,120 | 1 | 0 | 1 | 0 |
| Case 109 | 5 | 140,711,595 | 140,751,698 | 2 | 0 | 2 | 1 |
| Case 109 | 5 | 140,752,104 | 140,763,515 | 1 | 0 | 1 | 0 |
| Case 109 | 5 | 140,763,615 | 140,780,036 | 2 | 0 | 2 | 1 |
| Case 109 | 5 | 140,782,160 | 140,797,827 | 1 | 0 | 1 | 0 |
| Case 109 | 5 | 140,798,156 | 140,892,643 | 2 | 0 | 2 | 1 |
| Case 109 | 5 | 140,895,377 | 141,023,997 | 1 | 0 | 1 | 0 |
| Case 109 | 5 | 141,024,136 | 141,101,086 | 2 | 0 | 2 | 1 |
| Case 109 | 5 | 141,103,117 | 141,205,861 | 1 | 0 | 1 | 0 |
| Case 109 | 5 | 141,206,585 | 141,246,646 | 2 | 0 | 2 | 1 |
| Case 109 | 5 | 141,248,208 | 141,334,782 | 1 | 0 | 1 | 0 |
| Case 109 | 5 | 141,334,838 | 141,337,176 | 2 | 0 | 2 | 1 |
| Case 109 | 5 | 141,337,177 | 141,974,070 | 1 | 0 | 1 | 0 |
| Case 109 | 5 | 141,974,533 | 142,020,818 | 2 | 0 | 2 | 1 |
| Case 109 | 5 | 142,021,377 | 142,507,651 | 1 | 0 | 1 | 0 |
| Case 109 | 5 | 142,508,981 | 142,562,196 | 2 | 0 | 2 | 1 |
| Case 109 | 5 | 142,564,672 | 142,866,564 | 1 | 0 | 1 | 0 |

|          |   |             |             |   |   |   |   |
|----------|---|-------------|-------------|---|---|---|---|
| Case 109 | 5 | 142,867,085 | 172,995,160 | 2 | 0 | 2 | 1 |
| Case 109 | 5 | 172,997,978 | 173,422,382 | 3 | 0 | 3 | 1 |
| Case 109 | 5 | 173,424,464 | 175,874,713 | 2 | 0 | 2 | 1 |
| Case 109 | 5 | 175,878,007 | 176,165,086 | 3 | 0 | 3 | 1 |
| Case 109 | 5 | 176,168,507 | 180,693,127 | 2 | 0 | 2 | 1 |
| Case 109 | 6 | 108,666     | 3,605,434   | 4 | 0 | 4 | 1 |
| Case 109 | 6 | 3,607,159   | 3,619,044   | 4 | 1 | 5 | 0 |
| Case 109 | 6 | 3,626,372   | 3,653,224   | 3 | 1 | 4 | 0 |
| Case 109 | 6 | 3,655,479   | 4,069,048   | 4 | 1 | 5 | 0 |
| Case 109 | 6 | 4,069,133   | 4,380,902   | 3 | 1 | 4 | 0 |
| Case 109 | 6 | 4,382,113   | 4,395,451   | 2 | 2 | 4 | 0 |
| Case 109 | 6 | 4,395,504   | 5,320,622   | 4 | 1 | 5 | 0 |
| Case 109 | 6 | 5,343,889   | 5,656,275   | 3 | 1 | 4 | 0 |
| Case 109 | 6 | 5,659,478   | 5,663,598   | 2 | 1 | 3 | 0 |
| Case 109 | 6 | 5,664,388   | 7,417,576   | 4 | 0 | 4 | 1 |
| Case 109 | 6 | 7,417,658   | 7,579,412   | 3 | 1 | 4 | 0 |
| Case 109 | 6 | 7,580,039   | 7,585,962   | 2 | 1 | 3 | 0 |
| Case 109 | 6 | 7,586,308   | 7,729,614   | 3 | 1 | 4 | 0 |
| Case 109 | 6 | 7,730,944   | 8,062,532   | 2 | 1 | 3 | 0 |
| Case 109 | 6 | 8,065,230   | 8,417,198   | 3 | 1 | 4 | 0 |
| Case 109 | 6 | 8,417,687   | 8,534,460   | 2 | 1 | 3 | 0 |
| Case 109 | 6 | 8,542,393   | 9,030,336   | 3 | 1 | 4 | 0 |
| Case 109 | 6 | 9,031,654   | 9,031,961   | 2 | 2 | 4 | 0 |
| Case 109 | 6 | 9,042,512   | 10,395,206  | 4 | 1 | 5 | 0 |
| Case 109 | 6 | 10,395,572  | 10,990,751  | 3 | 1 | 4 | 0 |
| Case 109 | 6 | 10,995,180  | 11,135,805  | 2 | 1 | 3 | 0 |
| Case 109 | 6 | 11,138,038  | 12,120,445  | 3 | 1 | 4 | 0 |
| Case 109 | 6 | 12,120,536  | 12,164,467  | 2 | 1 | 3 | 0 |
| Case 109 | 6 | 12,165,363  | 12,263,693  | 3 | 1 | 4 | 0 |
| Case 109 | 6 | 12,273,540  | 12,298,333  | 2 | 1 | 3 | 0 |
| Case 109 | 6 | 12,298,984  | 13,307,904  | 3 | 1 | 4 | 0 |
| Case 109 | 6 | 13,316,249  | 13,340,288  | 2 | 1 | 3 | 0 |
| Case 109 | 6 | 13,340,967  | 13,490,904  | 3 | 1 | 4 | 0 |
| Case 109 | 6 | 13,506,872  | 15,916,856  | 2 | 1 | 3 | 0 |
| Case 109 | 6 | 15,923,183  | 16,343,056  | 3 | 1 | 4 | 0 |
| Case 109 | 6 | 16,362,246  | 16,522,826  | 1 | 0 | 1 | 0 |
| Case 109 | 6 | 16,528,671  | 17,706,404  | 3 | 1 | 4 | 0 |
| Case 109 | 6 | 17,706,524  | 17,890,002  | 2 | 1 | 3 | 0 |
| Case 109 | 6 | 17,896,035  | 20,107,427  | 3 | 1 | 4 | 0 |
| Case 109 | 6 | 20,109,696  | 20,213,334  | 2 | 1 | 3 | 0 |
| Case 109 | 6 | 20,226,668  | 20,417,976  | 3 | 1 | 4 | 0 |
| Case 109 | 6 | 20,418,329  | 20,556,905  | 2 | 1 | 3 | 0 |
| Case 109 | 6 | 20,562,618  | 21,277,763  | 3 | 1 | 4 | 0 |
| Case 109 | 6 | 21,279,870  | 21,402,434  | 2 | 1 | 3 | 0 |
| Case 109 | 6 | 21,420,553  | 21,972,800  | 3 | 1 | 4 | 0 |
| Case 109 | 6 | 21,982,253  | 22,038,380  | 2 | 2 | 4 | 0 |
| Case 109 | 6 | 22,038,526  | 22,282,731  | 4 | 1 | 5 | 0 |
| Case 109 | 6 | 22,282,905  | 22,403,467  | 2 | 2 | 4 | 0 |
| Case 109 | 6 | 22,403,592  | 22,687,498  | 4 | 1 | 5 | 0 |
| Case 109 | 6 | 22,693,005  | 24,403,455  | 3 | 1 | 4 | 0 |
| Case 109 | 6 | 24,404,405  | 24,698,214  | 2 | 1 | 3 | 0 |
| Case 109 | 6 | 24,698,215  | 25,653,628  | 3 | 1 | 4 | 0 |
| Case 109 | 6 | 25,653,678  | 25,813,150  | 2 | 1 | 3 | 0 |
| Case 109 | 6 | 25,819,762  | 25,957,773  | 3 | 1 | 4 | 0 |
| Case 109 | 6 | 25,959,355  | 26,110,314  | 2 | 1 | 3 | 0 |
| Case 109 | 6 | 26,110,961  | 26,129,392  | 3 | 1 | 4 | 0 |
| Case 109 | 6 | 26,132,664  | 26,833,759  | 2 | 1 | 3 | 0 |
| Case 109 | 6 | 26,915,342  | 27,178,028  | 3 | 1 | 4 | 0 |
| Case 109 | 6 | 27,179,829  | 28,982,287  | 2 | 1 | 3 | 0 |
| Case 109 | 6 | 28,984,163  | 29,272,012  | 4 | 0 | 4 | 1 |
| Case 109 | 6 | 29,272,301  | 30,072,511  | 3 | 0 | 3 | 1 |



|          |   |            |            |   |   |   |   |
|----------|---|------------|------------|---|---|---|---|
| Case 109 | 6 | 30,072,721 | 30,092,935 | 3 | 1 | 4 | 0 |
| Case 109 | 6 | 30,093,364 | 30,190,484 | 2 | 1 | 3 | 0 |
| Case 109 | 6 | 30,190,640 | 30,333,505 | 4 | 0 | 4 | 1 |
| Case 109 | 6 | 30,334,339 | 30,387,890 | 4 | 1 | 5 | 0 |
| Case 109 | 6 | 30,388,010 | 30,388,010 | 2 | 0 | 2 | 1 |
| Case 109 | 6 | 30,388,701 | 30,434,566 | 4 | 0 | 4 | 1 |
| Case 109 | 6 | 30,434,900 | 30,623,069 | 3 | 1 | 4 | 0 |
| Case 109 | 6 | 30,623,339 | 30,626,614 | 2 | 1 | 3 | 0 |
| Case 109 | 6 | 30,627,138 | 30,709,830 | 4 | 0 | 4 | 1 |
| Case 109 | 6 | 30,710,135 | 31,082,535 | 3 | 1 | 4 | 0 |
| Case 109 | 6 | 31,082,960 | 31,106,643 | 2 | 1 | 3 | 0 |
| Case 109 | 6 | 31,106,793 | 31,236,410 | 3 | 1 | 4 | 0 |
| Case 109 | 6 | 31,236,567 | 31,269,553 | 2 | 1 | 3 | 0 |
| Case 109 | 6 | 31,271,008 | 31,406,932 | 4 | 0 | 4 | 1 |
| Case 109 | 6 | 31,407,579 | 31,453,640 | 3 | 1 | 4 | 0 |
| Case 109 | 6 | 31,456,567 | 31,748,678 | 2 | 1 | 3 | 0 |
| Case 109 | 6 | 31,748,820 | 31,764,899 | 3 | 1 | 4 | 0 |
| Case 109 | 6 | 31,765,056 | 32,188,317 | 2 | 1 | 3 | 0 |
| Case 109 | 6 | 32,188,383 | 32,365,580 | 3 | 1 | 4 | 0 |
| Case 109 | 6 | 32,365,840 | 32,410,576 | 2 | 1 | 3 | 0 |
| Case 109 | 6 | 32,410,716 | 32,450,089 | 3 | 1 | 4 | 0 |
| Case 109 | 6 | 32,453,191 | 32,634,341 | 2 | 1 | 3 | 0 |
| Case 109 | 6 | 32,634,369 | 32,811,383 | 3 | 1 | 4 | 0 |
| Case 109 | 6 | 32,811,629 | 32,821,022 | 2 | 1 | 3 | 0 |
| Case 109 | 6 | 32,821,086 | 33,145,710 | 3 | 1 | 4 | 0 |
| Case 109 | 6 | 33,146,725 | 33,297,586 | 2 | 1 | 3 | 0 |
| Case 109 | 6 | 33,300,271 | 33,365,640 | 3 | 1 | 4 | 0 |
| Case 109 | 6 | 33,365,808 | 33,398,620 | 2 | 1 | 3 | 0 |
| Case 109 | 6 | 33,399,778 | 33,648,097 | 3 | 1 | 4 | 0 |
| Case 109 | 6 | 33,648,115 | 33,867,440 | 2 | 1 | 3 | 0 |
| Case 109 | 6 | 33,868,647 | 34,804,000 | 3 | 1 | 4 | 0 |
| Case 109 | 6 | 34,804,204 | 35,471,362 | 2 | 1 | 3 | 0 |
| Case 109 | 6 | 35,471,605 | 35,705,606 | 3 | 1 | 4 | 0 |
| Case 109 | 6 | 35,705,818 | 36,307,044 | 2 | 1 | 3 | 0 |
| Case 109 | 6 | 36,307,170 | 36,798,081 | 3 | 1 | 4 | 0 |
| Case 109 | 6 | 36,798,150 | 36,892,221 | 2 | 1 | 3 | 0 |
| Case 109 | 6 | 36,893,083 | 37,038,432 | 3 | 1 | 4 | 0 |
| Case 109 | 6 | 37,050,771 | 37,254,990 | 2 | 1 | 3 | 0 |
| Case 109 | 6 | 37,257,787 | 37,508,106 | 3 | 1 | 4 | 0 |
| Case 109 | 6 | 37,509,545 | 37,630,020 | 2 | 1 | 3 | 0 |
| Case 109 | 6 | 37,631,031 | 38,747,581 | 3 | 1 | 4 | 0 |
| Case 109 | 6 | 38,747,770 | 39,095,146 | 2 | 1 | 3 | 0 |
| Case 109 | 6 | 39,098,344 | 39,815,595 | 3 | 1 | 4 | 0 |
| Case 109 | 6 | 39,824,130 | 39,911,241 | 2 | 1 | 3 | 0 |
| Case 109 | 6 | 39,915,349 | 41,645,564 | 3 | 1 | 4 | 0 |
| Case 109 | 6 | 41,648,147 | 41,650,736 | 2 | 1 | 3 | 0 |
| Case 109 | 6 | 41,652,493 | 42,609,352 | 4 | 0 | 4 | 1 |
| Case 109 | 6 | 42,611,872 | 43,114,702 | 3 | 1 | 4 | 0 |
| Case 109 | 6 | 43,115,670 | 43,172,498 | 2 | 1 | 3 | 0 |
| Case 109 | 6 | 43,172,528 | 43,469,298 | 3 | 1 | 4 | 0 |
| Case 109 | 6 | 43,469,299 | 43,572,467 | 2 | 1 | 3 | 0 |
| Case 109 | 6 | 43,578,397 | 44,551,487 | 4 | 0 | 4 | 1 |
| Case 109 | 6 | 44,558,552 | 44,609,610 | 3 | 1 | 4 | 0 |
| Case 109 | 6 | 44,612,363 | 44,681,257 | 2 | 2 | 4 | 0 |
| Case 109 | 6 | 44,681,721 | 46,717,454 | 4 | 1 | 5 | 0 |
| Case 109 | 6 | 46,717,652 | 46,979,756 | 2 | 2 | 4 | 0 |
| Case 109 | 6 | 46,980,115 | 47,649,356 | 4 | 1 | 5 | 0 |
| Case 109 | 6 | 47,649,573 | 47,669,444 | 2 | 2 | 4 | 0 |
| Case 109 | 6 | 47,675,014 | 47,682,519 | 2 | 1 | 3 | 0 |
| Case 109 | 6 | 47,682,604 | 50,029,391 | 3 | 1 | 4 | 0 |
| Case 109 | 6 | 50,041,852 | 57,246,925 | 1 | 1 | 2 | 0 |

|          |   |             |             |   |   |   |   |
|----------|---|-------------|-------------|---|---|---|---|
| Case 109 | 6 | 57,255,152  | 58,150,777  | 2 | 1 | 3 | 0 |
| Case 109 | 6 | 58,168,152  | 58,752,089  | 1 | 1 | 2 | 0 |
| Case 109 | 6 | 61,891,118  | 63,199,731  | 3 | 1 | 4 | 0 |
| Case 109 | 6 | 63,209,941  | 63,733,495  | 2 | 0 | 2 | 1 |
| Case 109 | 6 | 63,746,291  | 68,503,143  | 2 | 1 | 3 | 0 |
| Case 109 | 6 | 68,526,511  | 72,590,002  | 2 | 0 | 2 | 1 |
| Case 109 | 6 | 72,595,779  | 76,096,230  | 2 | 1 | 3 | 0 |
| Case 109 | 6 | 76,119,602  | 124,698,568 | 2 | 0 | 2 | 1 |
| Case 109 | 6 | 124,699,827 | 128,915,599 | 2 | 1 | 3 | 0 |
| Case 109 | 6 | 128,922,744 | 128,994,545 | 2 | 2 | 4 | 0 |
| Case 109 | 6 | 128,998,864 | 130,049,171 | 2 | 1 | 3 | 0 |
| Case 109 | 6 | 130,050,610 | 130,082,258 | 2 | 2 | 4 | 0 |
| Case 109 | 6 | 130,084,368 | 133,119,564 | 2 | 1 | 3 | 0 |
| Case 109 | 6 | 133,122,831 | 133,447,476 | 2 | 2 | 4 | 0 |
| Case 109 | 6 | 133,447,768 | 135,536,496 | 2 | 1 | 3 | 0 |
| Case 109 | 6 | 135,539,080 | 136,492,417 | 2 | 2 | 4 | 0 |
| Case 109 | 6 | 136,495,009 | 167,830,592 | 2 | 1 | 3 | 0 |
| Case 109 | 6 | 167,830,685 | 169,672,120 | 2 | 0 | 2 | 1 |
| Case 109 | 6 | 169,678,116 | 170,980,171 | 2 | 1 | 3 | 0 |
| Case 109 | 7 | 44,935      | 1,005,950   | 2 | 1 | 3 | 0 |
| Case 109 | 7 | 1,009,337   | 1,040,173   | 3 | 1 | 4 | 0 |
| Case 109 | 7 | 1,044,938   | 1,287,913   | 2 | 1 | 3 | 0 |
| Case 109 | 7 | 1,288,639   | 1,523,698   | 2 | 2 | 4 | 0 |
| Case 109 | 7 | 1,523,742   | 2,472,939   | 2 | 1 | 3 | 0 |
| Case 109 | 7 | 2,473,059   | 2,752,932   | 3 | 1 | 4 | 0 |
| Case 109 | 7 | 2,753,667   | 3,090,282   | 2 | 1 | 3 | 0 |
| Case 109 | 7 | 3,093,297   | 3,488,521   | 2 | 2 | 4 | 0 |
| Case 109 | 7 | 3,490,865   | 4,136,969   | 2 | 1 | 3 | 0 |
| Case 109 | 7 | 4,139,470   | 4,644,965   | 2 | 2 | 4 | 0 |
| Case 109 | 7 | 4,647,262   | 4,820,940   | 2 | 1 | 3 | 0 |
| Case 109 | 7 | 4,821,257   | 4,855,862   | 3 | 1 | 4 | 0 |
| Case 109 | 7 | 4,855,934   | 5,401,346   | 2 | 1 | 3 | 0 |
| Case 109 | 7 | 5,402,453   | 5,891,221   | 2 | 2 | 4 | 0 |
| Case 109 | 7 | 5,908,742   | 6,191,895   | 2 | 1 | 3 | 0 |
| Case 109 | 7 | 6,193,628   | 6,362,809   | 3 | 1 | 4 | 0 |
| Case 109 | 7 | 6,362,978   | 6,780,231   | 2 | 1 | 3 | 0 |
| Case 109 | 7 | 6,859,544   | 8,796,967   | 2 | 2 | 4 | 0 |
| Case 109 | 7 | 8,797,321   | 8,995,047   | 3 | 2 | 5 | 0 |
| Case 109 | 7 | 8,995,694   | 11,975,557  | 3 | 1 | 4 | 0 |
| Case 109 | 7 | 11,982,513  | 12,484,649  | 2 | 2 | 4 | 0 |
| Case 109 | 7 | 12,485,026  | 12,596,535  | 3 | 2 | 5 | 0 |
| Case 109 | 7 | 12,596,616  | 13,103,636  | 3 | 1 | 4 | 0 |
| Case 109 | 7 | 13,104,434  | 13,263,062  | 3 | 2 | 5 | 0 |
| Case 109 | 7 | 13,263,382  | 14,288,622  | 3 | 1 | 4 | 0 |
| Case 109 | 7 | 14,292,511  | 18,712,720  | 2 | 2 | 4 | 0 |
| Case 109 | 7 | 18,713,515  | 18,794,541  | 3 | 2 | 5 | 0 |
| Case 109 | 7 | 18,794,581  | 19,848,148  | 2 | 2 | 4 | 0 |
| Case 109 | 7 | 19,849,629  | 20,185,196  | 3 | 2 | 5 | 0 |
| Case 109 | 7 | 20,193,851  | 22,412,741  | 2 | 2 | 4 | 0 |
| Case 109 | 7 | 22,414,646  | 22,422,608  | 2 | 1 | 3 | 0 |
| Case 109 | 7 | 22,422,917  | 22,766,834  | 3 | 1 | 4 | 0 |
| Case 109 | 7 | 22,767,134  | 30,810,264  | 2 | 2 | 4 | 0 |
| Case 109 | 7 | 30,811,746  | 31,044,646  | 2 | 1 | 3 | 0 |
| Case 109 | 7 | 31,048,898  | 38,297,145  | 2 | 2 | 4 | 0 |
| Case 109 | 7 | 38,298,285  | 38,417,556  | 3 | 2 | 5 | 0 |
| Case 109 | 7 | 38,420,184  | 38,545,499  | 2 | 2 | 4 | 0 |
| Case 109 | 7 | 38,546,848  | 38,640,752  | 3 | 2 | 5 | 0 |
| Case 109 | 7 | 38,641,095  | 38,933,942  | 3 | 1 | 4 | 0 |
| Case 109 | 7 | 38,946,736  | 39,030,401  | 3 | 2 | 5 | 0 |
| Case 109 | 7 | 39,036,411  | 39,515,179  | 2 | 2 | 4 | 0 |
| Case 109 | 7 | 39,516,722  | 40,197,168  | 3 | 2 | 5 | 0 |

|          |   |             |             |   |   |   |   |
|----------|---|-------------|-------------|---|---|---|---|
| Case 109 | 7 | 40,203,356  | 41,659,417  | 2 | 2 | 4 | 0 |
| Case 109 | 7 | 41,662,627  | 41,971,266  | 3 | 2 | 5 | 0 |
| Case 109 | 7 | 41,973,509  | 44,555,699  | 2 | 2 | 4 | 0 |
| Case 109 | 7 | 44,556,373  | 44,747,578  | 2 | 1 | 3 | 0 |
| Case 109 | 7 | 44,750,079  | 53,009,493  | 2 | 2 | 4 | 0 |
| Case 109 | 7 | 53,011,628  | 53,103,834  | 3 | 2 | 5 | 0 |
| Case 109 | 7 | 53,103,945  | 53,652,608  | 2 | 2 | 4 | 0 |
| Case 109 | 7 | 53,654,002  | 54,610,293  | 3 | 2 | 5 | 0 |
| Case 109 | 7 | 54,610,426  | 58,019,061  | 2 | 2 | 4 | 0 |
| Case 109 | 7 | 61,056,053  | 72,903,700  | 2 | 2 | 4 | 0 |
| Case 109 | 7 | 72,904,810  | 72,982,874  | 3 | 2 | 5 | 0 |
| Case 109 | 7 | 72,984,087  | 73,604,927  | 3 | 1 | 4 | 0 |
| Case 109 | 7 | 73,624,615  | 73,985,812  | 2 | 2 | 4 | 0 |
| Case 109 | 7 | 73,990,231  | 75,221,832  | 2 | 1 | 3 | 0 |
| Case 109 | 7 | 75,222,070  | 93,142,429  | 2 | 2 | 4 | 0 |
| Case 109 | 7 | 93,143,761  | 93,404,220  | 3 | 2 | 5 | 0 |
| Case 109 | 7 | 93,404,574  | 97,816,327  | 2 | 2 | 4 | 0 |
| Case 109 | 7 | 97,817,321  | 97,834,386  | 2 | 1 | 3 | 0 |
| Case 109 | 7 | 97,835,640  | 99,474,016  | 2 | 2 | 4 | 0 |
| Case 109 | 7 | 99,474,143  | 99,773,962  | 2 | 1 | 3 | 0 |
| Case 109 | 7 | 99,773,974  | 100,179,435 | 2 | 2 | 4 | 0 |
| Case 109 | 7 | 100,179,857 | 100,211,255 | 2 | 1 | 3 | 0 |
| Case 109 | 7 | 100,211,329 | 100,451,907 | 2 | 2 | 4 | 0 |
| Case 109 | 7 | 100,453,208 | 103,237,018 | 2 | 1 | 3 | 0 |
| Case 109 | 7 | 103,241,465 | 103,659,343 | 3 | 1 | 4 | 0 |
| Case 109 | 7 | 103,666,719 | 103,893,163 | 2 | 1 | 3 | 0 |
| Case 109 | 7 | 103,895,925 | 104,106,026 | 3 | 1 | 4 | 0 |
| Case 109 | 7 | 104,107,166 | 141,759,994 | 2 | 1 | 3 | 0 |
| Case 109 | 7 | 141,761,438 | 141,777,292 | 1 | 0 | 1 | 0 |
| Case 109 | 7 | 141,782,731 | 141,898,023 | 3 | 0 | 3 | 1 |
| Case 109 | 7 | 141,898,680 | 141,938,235 | 2 | 0 | 2 | 1 |
| Case 109 | 7 | 141,941,327 | 145,129,737 | 2 | 1 | 3 | 0 |
| Case 109 | 7 | 145,130,880 | 146,590,038 | 3 | 1 | 4 | 0 |
| Case 109 | 7 | 146,591,888 | 146,901,009 | 2 | 1 | 3 | 0 |
| Case 109 | 7 | 146,910,565 | 147,505,863 | 3 | 1 | 4 | 0 |
| Case 109 | 7 | 147,505,893 | 147,933,618 | 2 | 1 | 3 | 0 |
| Case 109 | 7 | 147,936,803 | 147,958,844 | 3 | 1 | 4 | 0 |
| Case 109 | 7 | 147,958,867 | 149,394,446 | 2 | 1 | 3 | 0 |
| Case 109 | 7 | 149,398,065 | 149,437,827 | 3 | 1 | 4 | 0 |
| Case 109 | 7 | 149,438,267 | 149,498,893 | 2 | 1 | 3 | 0 |
| Case 109 | 7 | 149,499,027 | 149,529,955 | 3 | 1 | 4 | 0 |
| Case 109 | 7 | 149,529,962 | 151,945,503 | 2 | 1 | 3 | 0 |
| Case 109 | 7 | 151,945,656 | 152,152,777 | 2 | 0 | 2 | 1 |
| Case 109 | 7 | 152,162,209 | 152,277,531 | 3 | 0 | 3 | 1 |
| Case 109 | 7 | 152,285,741 | 152,343,955 | 3 | 1 | 4 | 0 |
| Case 109 | 7 | 152,345,204 | 152,457,803 | 2 | 1 | 3 | 0 |
| Case 109 | 7 | 152,496,656 | 159,119,486 | 2 | 2 | 4 | 0 |
| Case 109 | 8 | 164,984     | 3,336,289   | 2 | 1 | 3 | 0 |
| Case 109 | 8 | 3,339,898   | 36,939,955  | 1 | 1 | 2 | 0 |
| Case 109 | 8 | 36,953,646  | 37,469,049  | 3 | 1 | 4 | 0 |
| Case 109 | 8 | 37,469,921  | 43,791,691  | 2 | 1 | 3 | 0 |
| Case 109 | 8 | 46,886,735  | 48,909,724  | 2 | 1 | 3 | 0 |
| Case 109 | 8 | 48,924,667  | 50,734,527  | 2 | 2 | 4 | 0 |
| Case 109 | 8 | 50,752,038  | 65,254,172  | 2 | 1 | 3 | 0 |
| Case 109 | 8 | 65,272,478  | 69,693,543  | 2 | 2 | 4 | 0 |
| Case 109 | 8 | 69,699,676  | 70,457,752  | 3 | 2 | 5 | 0 |
| Case 109 | 8 | 70,459,208  | 71,834,440  | 2 | 2 | 4 | 0 |
| Case 109 | 8 | 71,837,936  | 72,180,481  | 3 | 2 | 5 | 0 |
| Case 109 | 8 | 72,180,634  | 72,246,370  | 2 | 2 | 4 | 0 |
| Case 109 | 8 | 72,248,174  | 73,487,114  | 4 | 1 | 5 | 0 |
| Case 109 | 8 | 73,488,971  | 73,587,489  | 5 | 2 | 7 | 0 |

|          |   |             |             |   |   |   |   |
|----------|---|-------------|-------------|---|---|---|---|
| Case 109 | 8 | 73,587,678  | 73,821,073  | 4 | 1 | 5 | 0 |
| Case 109 | 8 | 73,821,809  | 73,850,203  | 2 | 2 | 4 | 0 |
| Case 109 | 8 | 73,850,812  | 76,022,121  | 4 | 1 | 5 | 0 |
| Case 109 | 8 | 76,023,383  | 77,006,395  | 4 | 2 | 6 | 0 |
| Case 109 | 8 | 77,032,017  | 77,761,824  | 4 | 1 | 5 | 0 |
| Case 109 | 8 | 77,761,919  | 77,768,512  | 2 | 2 | 4 | 0 |
| Case 109 | 8 | 77,769,819  | 77,998,659  | 4 | 1 | 5 | 0 |
| Case 109 | 8 | 78,012,371  | 79,417,222  | 4 | 2 | 6 | 0 |
| Case 109 | 8 | 79,420,199  | 80,882,568  | 4 | 1 | 5 | 0 |
| Case 109 | 8 | 80,901,524  | 80,915,400  | 2 | 0 | 2 | 1 |
| Case 109 | 8 | 80,924,116  | 80,937,871  | 6 | 1 | 7 | 0 |
| Case 109 | 8 | 80,939,650  | 81,751,247  | 4 | 1 | 5 | 0 |
| Case 109 | 8 | 81,753,399  | 81,886,515  | 5 | 1 | 6 | 0 |
| Case 109 | 8 | 81,886,686  | 82,266,889  | 4 | 1 | 5 | 0 |
| Case 109 | 8 | 82,267,924  | 82,598,908  | 5 | 1 | 6 | 0 |
| Case 109 | 8 | 82,601,846  | 82,918,392  | 4 | 1 | 5 | 0 |
| Case 109 | 8 | 82,921,787  | 84,113,893  | 5 | 1 | 6 | 0 |
| Case 109 | 8 | 84,114,931  | 84,222,110  | 4 | 1 | 5 | 0 |
| Case 109 | 8 | 84,249,739  | 84,941,509  | 5 | 2 | 7 | 0 |
| Case 109 | 8 | 84,948,131  | 87,925,926  | 4 | 1 | 5 | 0 |
| Case 109 | 8 | 87,935,589  | 88,868,340  | 4 | 2 | 6 | 0 |
| Case 109 | 8 | 88,881,431  | 89,426,999  | 4 | 1 | 5 | 0 |
| Case 109 | 8 | 89,434,405  | 90,965,828  | 5 | 1 | 6 | 0 |
| Case 109 | 8 | 90,965,863  | 91,064,118  | 4 | 1 | 5 | 0 |
| Case 109 | 8 | 91,064,635  | 91,283,363  | 5 | 1 | 6 | 0 |
| Case 109 | 8 | 91,284,182  | 92,365,184  | 4 | 1 | 5 | 0 |
| Case 109 | 8 | 92,374,629  | 94,081,629  | 5 | 1 | 6 | 0 |
| Case 109 | 8 | 94,086,267  | 95,383,875  | 4 | 1 | 5 | 0 |
| Case 109 | 8 | 95,384,436  | 95,392,437  | 5 | 2 | 7 | 0 |
| Case 109 | 8 | 95,392,557  | 95,774,806  | 4 | 1 | 5 | 0 |
| Case 109 | 8 | 95,777,424  | 95,942,244  | 5 | 1 | 6 | 0 |
| Case 109 | 8 | 95,942,806  | 96,470,675  | 4 | 1 | 5 | 0 |
| Case 109 | 8 | 96,472,090  | 96,731,898  | 5 | 1 | 6 | 0 |
| Case 109 | 8 | 96,732,452  | 98,485,861  | 4 | 1 | 5 | 0 |
| Case 109 | 8 | 98,519,919  | 98,933,711  | 5 | 1 | 6 | 0 |
| Case 109 | 8 | 98,934,748  | 99,192,115  | 4 | 1 | 5 | 0 |
| Case 109 | 8 | 99,195,204  | 101,611,200 | 5 | 1 | 6 | 0 |
| Case 109 | 8 | 101,612,659 | 102,180,058 | 4 | 1 | 5 | 0 |
| Case 109 | 8 | 102,181,249 | 102,554,217 | 5 | 1 | 6 | 0 |
| Case 109 | 8 | 102,555,060 | 102,756,851 | 4 | 1 | 5 | 0 |
| Case 109 | 8 | 102,761,332 | 103,073,460 | 5 | 1 | 6 | 0 |
| Case 109 | 8 | 103,076,379 | 103,213,460 | 4 | 1 | 5 | 0 |
| Case 109 | 8 | 103,216,646 | 103,524,176 | 5 | 1 | 6 | 0 |
| Case 109 | 8 | 103,524,461 | 103,576,066 | 4 | 1 | 5 | 0 |
| Case 109 | 8 | 103,576,658 | 103,591,184 | 6 | 1 | 7 | 0 |
| Case 109 | 8 | 103,591,237 | 104,432,617 | 4 | 1 | 5 | 0 |
| Case 109 | 8 | 104,432,659 | 104,882,403 | 5 | 1 | 6 | 0 |
| Case 109 | 8 | 104,897,539 | 104,924,389 | 4 | 1 | 5 | 0 |
| Case 109 | 8 | 104,925,755 | 105,348,809 | 6 | 1 | 7 | 0 |
| Case 109 | 8 | 105,351,943 | 105,884,605 | 4 | 1 | 5 | 0 |
| Case 109 | 8 | 105,887,854 | 106,725,186 | 5 | 1 | 6 | 0 |
| Case 109 | 8 | 106,729,039 | 106,815,578 | 4 | 1 | 5 | 0 |
| Case 109 | 8 | 106,816,281 | 106,916,390 | 5 | 2 | 7 | 0 |
| Case 109 | 8 | 106,916,907 | 107,312,556 | 4 | 1 | 5 | 0 |
| Case 109 | 8 | 107,323,253 | 107,515,351 | 5 | 1 | 6 | 0 |
| Case 109 | 8 | 107,519,504 | 108,158,383 | 4 | 1 | 5 | 0 |
| Case 109 | 8 | 108,158,452 | 108,158,452 | 2 | 2 | 4 | 0 |
| Case 109 | 8 | 108,175,323 | 108,974,658 | 3 | 2 | 5 | 0 |
| Case 109 | 8 | 108,989,834 | 109,012,769 | 3 | 1 | 4 | 0 |
| Case 109 | 8 | 109,015,020 | 109,096,029 | 2 | 2 | 4 | 0 |
| Case 109 | 8 | 109,114,261 | 110,660,908 | 4 | 1 | 5 | 0 |

|          |    |             |             |   |   |   |   |
|----------|----|-------------|-------------|---|---|---|---|
| Case 109 | 8  | 110,666,155 | 111,427,941 | 4 | 2 | 6 | 0 |
| Case 109 | 8  | 111,432,405 | 111,626,655 | 4 | 1 | 5 | 0 |
| Case 109 | 8  | 111,628,625 | 117,087,613 | 5 | 1 | 6 | 0 |
| Case 109 | 8  | 117,099,512 | 119,936,669 | 4 | 1 | 5 | 0 |
| Case 109 | 8  | 119,936,717 | 123,961,799 | 2 | 2 | 4 | 0 |
| Case 109 | 8  | 123,963,776 | 123,966,118 | 2 | 1 | 3 | 0 |
| Case 109 | 8  | 123,967,175 | 124,717,641 | 2 | 2 | 4 | 0 |
| Case 109 | 8  | 124,718,333 | 125,132,012 | 2 | 1 | 3 | 0 |
| Case 109 | 8  | 125,132,234 | 133,877,427 | 2 | 2 | 4 | 0 |
| Case 109 | 8  | 133,880,375 | 134,152,994 | 2 | 1 | 3 | 0 |
| Case 109 | 8  | 134,153,463 | 136,623,771 | 2 | 2 | 4 | 0 |
| Case 109 | 8  | 136,624,184 | 136,829,636 | 2 | 1 | 3 | 0 |
| Case 109 | 8  | 136,832,856 | 137,218,971 | 2 | 2 | 4 | 0 |
| Case 109 | 8  | 137,240,873 | 144,822,037 | 2 | 1 | 3 | 0 |
| Case 109 | 8  | 144,870,701 | 144,894,496 | 3 | 1 | 4 | 0 |
| Case 109 | 8  | 144,895,495 | 144,942,718 | 2 | 1 | 3 | 0 |
| Case 109 | 8  | 144,942,796 | 144,948,861 | 2 | 2 | 4 | 0 |
| Case 109 | 8  | 144,950,720 | 145,634,413 | 2 | 1 | 3 | 0 |
| Case 109 | 8  | 145,634,556 | 146,293,414 | 2 | 2 | 4 | 0 |
| Case 109 | 9  | 46,587      | 710,966     | 1 | 0 | 1 | 0 |
| Case 109 | 9  | 710,972     | 712,856     | 2 | 0 | 2 | 1 |
| Case 109 | 9  | 713,108     | 988,376     | 1 | 0 | 1 | 0 |
| Case 109 | 9  | 990,076     | 1,000,520   | 2 | 0 | 2 | 1 |
| Case 109 | 9  | 1,001,309   | 1,032,153   | 1 | 0 | 1 | 0 |
| Case 109 | 9  | 1,032,567   | 1,056,887   | 2 | 0 | 2 | 1 |
| Case 109 | 9  | 1,056,959   | 2,684,117   | 1 | 0 | 1 | 0 |
| Case 109 | 9  | 2,691,186   | 2,718,180   | 2 | 0 | 2 | 1 |
| Case 109 | 9  | 2,718,349   | 4,110,947   | 1 | 0 | 1 | 0 |
| Case 109 | 9  | 4,117,602   | 4,125,858   | 2 | 0 | 2 | 1 |
| Case 109 | 9  | 4,125,908   | 5,466,785   | 1 | 0 | 1 | 0 |
| Case 109 | 9  | 5,467,955   | 5,526,124   | 2 | 0 | 2 | 1 |
| Case 109 | 9  | 5,532,871   | 5,919,754   | 1 | 0 | 1 | 0 |
| Case 109 | 9  | 5,919,923   | 5,920,702   | 2 | 0 | 2 | 1 |
| Case 109 | 9  | 5,920,886   | 7,170,742   | 1 | 0 | 1 | 0 |
| Case 109 | 9  | 7,173,500   | 7,214,782   | 2 | 0 | 2 | 1 |
| Case 109 | 9  | 7,216,180   | 16,318,314  | 1 | 0 | 1 | 0 |
| Case 109 | 9  | 16,318,869  | 16,348,639  | 2 | 0 | 2 | 1 |
| Case 109 | 9  | 16,349,135  | 18,928,456  | 1 | 0 | 1 | 0 |
| Case 109 | 9  | 18,928,487  | 18,928,963  | 2 | 0 | 2 | 1 |
| Case 109 | 9  | 18,929,692  | 19,057,965  | 1 | 0 | 1 | 0 |
| Case 109 | 9  | 19,058,204  | 19,063,081  | 2 | 0 | 2 | 1 |
| Case 109 | 9  | 19,065,295  | 19,465,900  | 1 | 0 | 1 | 0 |
| Case 109 | 9  | 19,468,530  | 19,516,177  | 2 | 0 | 2 | 1 |
| Case 109 | 9  | 19,516,335  | 26,078,764  | 1 | 0 | 1 | 0 |
| Case 109 | 9  | 26,083,996  | 46,944,322  | 2 | 0 | 2 | 1 |
| Case 109 | 9  | 65,629,772  | 109,931,412 | 2 | 0 | 2 | 1 |
| Case 109 | 9  | 109,940,271 | 110,940,013 | 7 | 0 | 7 | 1 |
| Case 109 | 9  | 110,941,390 | 111,123,697 | 5 | 0 | 5 | 1 |
| Case 109 | 9  | 111,128,013 | 111,761,469 | 3 | 0 | 3 | 1 |
| Case 109 | 9  | 111,765,737 | 120,416,248 | 2 | 0 | 2 | 1 |
| Case 109 | 9  | 120,416,402 | 129,139,361 | 3 | 0 | 3 | 1 |
| Case 109 | 9  | 129,141,450 | 129,408,513 | 4 | 0 | 4 | 1 |
| Case 109 | 9  | 129,409,198 | 141,066,491 | 3 | 0 | 3 | 1 |
| Case 109 | 10 | 98,087      | 1,070,621   | 2 | 1 | 3 | 0 |
| Case 109 | 10 | 1,073,684   | 1,223,742   | 3 | 1 | 4 | 0 |
| Case 109 | 10 | 1,224,336   | 1,352,152   | 2 | 1 | 3 | 0 |
| Case 109 | 10 | 1,359,774   | 1,980,822   | 3 | 1 | 4 | 0 |
| Case 109 | 10 | 1,981,965   | 2,360,003   | 2 | 1 | 3 | 0 |
| Case 109 | 10 | 2,363,832   | 3,134,083   | 3 | 1 | 4 | 0 |
| Case 109 | 10 | 3,134,681   | 3,316,388   | 2 | 1 | 3 | 0 |
| Case 109 | 10 | 3,319,474   | 3,536,296   | 3 | 1 | 4 | 0 |

|          |    |            |            |   |   |   |   |
|----------|----|------------|------------|---|---|---|---|
| Case 109 | 10 | 3,542,761  | 3,708,015  | 2 | 1 | 3 | 0 |
| Case 109 | 10 | 3,711,122  | 3,949,166  | 3 | 1 | 4 | 0 |
| Case 109 | 10 | 3,950,093  | 4,184,635  | 2 | 1 | 3 | 0 |
| Case 109 | 10 | 4,186,228  | 5,115,907  | 3 | 1 | 4 | 0 |
| Case 109 | 10 | 5,117,424  | 5,317,870  | 2 | 1 | 3 | 0 |
| Case 109 | 10 | 5,319,195  | 5,759,801  | 3 | 1 | 4 | 0 |
| Case 109 | 10 | 5,762,725  | 5,804,531  | 2 | 1 | 3 | 0 |
| Case 109 | 10 | 5,805,844  | 5,881,740  | 3 | 1 | 4 | 0 |
| Case 109 | 10 | 5,883,308  | 5,988,908  | 2 | 1 | 3 | 0 |
| Case 109 | 10 | 5,992,119  | 6,036,144  | 3 | 1 | 4 | 0 |
| Case 109 | 10 | 6,037,553  | 6,220,725  | 2 | 1 | 3 | 0 |
| Case 109 | 10 | 6,221,318  | 6,353,355  | 3 | 1 | 4 | 0 |
| Case 109 | 10 | 6,356,210  | 6,553,071  | 2 | 1 | 3 | 0 |
| Case 109 | 10 | 6,556,492  | 6,774,351  | 3 | 1 | 4 | 0 |
| Case 109 | 10 | 6,776,447  | 6,856,536  | 2 | 1 | 3 | 0 |
| Case 109 | 10 | 6,857,219  | 7,206,424  | 3 | 1 | 4 | 0 |
| Case 109 | 10 | 7,213,000  | 7,475,561  | 2 | 1 | 3 | 0 |
| Case 109 | 10 | 7,480,692  | 7,679,232  | 3 | 1 | 4 | 0 |
| Case 109 | 10 | 7,679,428  | 7,876,830  | 2 | 1 | 3 | 0 |
| Case 109 | 10 | 7,878,585  | 11,723,616 | 3 | 1 | 4 | 0 |
| Case 109 | 10 | 11,727,785 | 11,803,185 | 2 | 1 | 3 | 0 |
| Case 109 | 10 | 11,805,412 | 12,123,525 | 3 | 1 | 4 | 0 |
| Case 109 | 10 | 12,126,671 | 12,165,247 | 2 | 1 | 3 | 0 |
| Case 109 | 10 | 12,170,174 | 13,212,884 | 3 | 1 | 4 | 0 |
| Case 109 | 10 | 13,213,015 | 13,382,406 | 2 | 1 | 3 | 0 |
| Case 109 | 10 | 13,387,295 | 15,125,971 | 3 | 1 | 4 | 0 |
| Case 109 | 10 | 15,126,323 | 15,177,357 | 2 | 1 | 3 | 0 |
| Case 109 | 10 | 15,185,503 | 15,311,580 | 3 | 1 | 4 | 0 |
| Case 109 | 10 | 15,317,899 | 15,396,751 | 2 | 1 | 3 | 0 |
| Case 109 | 10 | 15,399,458 | 16,763,204 | 3 | 1 | 4 | 0 |
| Case 109 | 10 | 16,763,882 | 16,996,446 | 2 | 1 | 3 | 0 |
| Case 109 | 10 | 16,996,516 | 17,071,966 | 3 | 1 | 4 | 0 |
| Case 109 | 10 | 17,073,135 | 17,161,749 | 2 | 1 | 3 | 0 |
| Case 109 | 10 | 17,162,503 | 18,110,019 | 3 | 1 | 4 | 0 |
| Case 109 | 10 | 18,125,244 | 18,334,521 | 2 | 1 | 3 | 0 |
| Case 109 | 10 | 18,336,330 | 19,809,674 | 3 | 1 | 4 | 0 |
| Case 109 | 10 | 19,811,046 | 20,123,335 | 2 | 1 | 3 | 0 |
| Case 109 | 10 | 20,128,601 | 21,319,705 | 3 | 1 | 4 | 0 |
| Case 109 | 10 | 21,332,250 | 22,362,410 | 2 | 1 | 3 | 0 |
| Case 109 | 10 | 22,362,612 | 24,810,663 | 3 | 1 | 4 | 0 |
| Case 109 | 10 | 24,810,825 | 24,847,361 | 2 | 1 | 3 | 0 |
| Case 109 | 10 | 24,848,149 | 26,432,389 | 3 | 1 | 4 | 0 |
| Case 109 | 10 | 26,432,467 | 26,580,926 | 2 | 1 | 3 | 0 |
| Case 109 | 10 | 26,581,855 | 26,950,217 | 3 | 1 | 4 | 0 |
| Case 109 | 10 | 26,956,056 | 27,132,619 | 2 | 1 | 3 | 0 |
| Case 109 | 10 | 27,150,093 | 27,687,225 | 3 | 1 | 4 | 0 |
| Case 109 | 10 | 27,687,284 | 28,025,771 | 2 | 1 | 3 | 0 |
| Case 109 | 10 | 28,027,163 | 29,820,937 | 3 | 1 | 4 | 0 |
| Case 109 | 10 | 29,821,019 | 29,839,787 | 2 | 1 | 3 | 0 |
| Case 109 | 10 | 29,839,864 | 30,270,596 | 3 | 1 | 4 | 0 |
| Case 109 | 10 | 30,273,031 | 30,349,328 | 2 | 1 | 3 | 0 |
| Case 109 | 10 | 30,355,052 | 34,525,999 | 3 | 1 | 4 | 0 |
| Case 109 | 10 | 34,527,387 | 34,692,235 | 2 | 1 | 3 | 0 |
| Case 109 | 10 | 34,693,172 | 35,251,225 | 3 | 1 | 4 | 0 |
| Case 109 | 10 | 35,256,179 | 35,870,714 | 2 | 1 | 3 | 0 |
| Case 109 | 10 | 35,874,895 | 36,951,018 | 3 | 1 | 4 | 0 |
| Case 109 | 10 | 36,951,512 | 37,083,125 | 2 | 1 | 3 | 0 |
| Case 109 | 10 | 37,083,715 | 37,283,349 | 3 | 1 | 4 | 0 |
| Case 109 | 10 | 37,286,763 | 37,508,038 | 2 | 1 | 3 | 0 |
| Case 109 | 10 | 37,508,256 | 37,946,651 | 3 | 1 | 4 | 0 |
| Case 109 | 10 | 37,958,940 | 38,408,566 | 2 | 1 | 3 | 0 |

|          |    |             |             |   |   |   |   |
|----------|----|-------------|-------------|---|---|---|---|
| Case 109 | 10 | 38,415,965  | 39,097,912  | 3 | 1 | 4 | 0 |
| Case 109 | 10 | 42,436,301  | 94,336,963  | 1 | 1 | 2 | 0 |
| Case 109 | 10 | 94,347,830  | 94,792,142  | 2 | 1 | 3 | 0 |
| Case 109 | 10 | 94,793,453  | 132,225,095 | 1 | 1 | 2 | 0 |
| Case 109 | 10 | 132,231,596 | 132,254,561 | 2 | 1 | 3 | 0 |
| Case 109 | 10 | 132,262,631 | 135,371,416 | 1 | 1 | 2 | 0 |
| Case 109 | 10 | 135,372,380 | 135,373,648 | 1 | 0 | 1 | 0 |
| Case 109 | 10 | 135,377,448 | 135,477,883 | 1 | 1 | 2 | 0 |
| Case 109 | 11 | 193,146     | 5,536,764   | 2 | 0 | 2 | 1 |
| Case 109 | 11 | 5,536,773   | 5,566,489   | 3 | 0 | 3 | 1 |
| Case 109 | 11 | 5,566,507   | 5,878,551   | 2 | 0 | 2 | 1 |
| Case 109 | 11 | 5,878,617   | 5,966,415   | 3 | 0 | 3 | 1 |
| Case 109 | 11 | 5,967,747   | 6,646,499   | 2 | 0 | 2 | 1 |
| Case 109 | 11 | 6,646,500   | 6,689,064   | 3 | 0 | 3 | 1 |
| Case 109 | 11 | 6,695,844   | 12,274,865  | 2 | 0 | 2 | 1 |
| Case 109 | 11 | 12,277,191  | 12,308,500  | 3 | 0 | 3 | 1 |
| Case 109 | 11 | 12,309,002  | 19,401,373  | 2 | 0 | 2 | 1 |
| Case 109 | 11 | 19,405,356  | 19,566,243  | 3 | 0 | 3 | 1 |
| Case 109 | 11 | 19,569,563  | 20,101,744  | 2 | 0 | 2 | 1 |
| Case 109 | 11 | 20,102,251  | 20,163,318  | 3 | 0 | 3 | 1 |
| Case 109 | 11 | 20,164,332  | 34,420,930  | 2 | 0 | 2 | 1 |
| Case 109 | 11 | 34,423,616  | 51,591,253  | 2 | 1 | 3 | 0 |
| Case 109 | 11 | 54,794,237  | 55,360,213  | 2 | 1 | 3 | 0 |
| Case 109 | 11 | 55,361,808  | 55,431,897  | 1 | 1 | 2 | 0 |
| Case 109 | 11 | 55,432,646  | 86,304,054  | 2 | 1 | 3 | 0 |
| Case 109 | 11 | 86,304,402  | 86,305,758  | 1 | 0 | 1 | 0 |
| Case 109 | 11 | 86,308,532  | 104,789,971 | 2 | 1 | 3 | 0 |
| Case 109 | 11 | 104,809,654 | 121,128,969 | 1 | 1 | 2 | 0 |
| Case 109 | 11 | 121,129,528 | 121,416,187 | 2 | 1 | 3 | 0 |
| Case 109 | 11 | 121,420,669 | 134,934,063 | 1 | 1 | 2 | 0 |
| Case 109 | 12 | 191,619     | 24,792,818  | 2 | 0 | 2 | 1 |
| Case 109 | 12 | 24,798,175  | 25,024,151  | 6 | 1 | 7 | 0 |
| Case 109 | 12 | 25,024,510  | 25,056,665  | 4 | 1 | 5 | 0 |
| Case 109 | 12 | 25,061,338  | 25,132,771  | 6 | 1 | 7 | 0 |
| Case 109 | 12 | 25,138,016  | 25,149,269  | 4 | 1 | 5 | 0 |
| Case 109 | 12 | 25,150,466  | 25,663,977  | 6 | 1 | 7 | 0 |
| Case 109 | 12 | 25,664,853  | 25,832,829  | 4 | 1 | 5 | 0 |
| Case 109 | 12 | 25,834,871  | 26,213,222  | 2 | 2 | 4 | 0 |
| Case 109 | 12 | 26,213,720  | 26,287,230  | 2 | 1 | 3 | 0 |
| Case 109 | 12 | 26,297,309  | 26,607,753  | 2 | 2 | 4 | 0 |
| Case 109 | 12 | 26,611,381  | 26,784,910  | 2 | 1 | 3 | 0 |
| Case 109 | 12 | 26,785,881  | 27,016,527  | 2 | 2 | 4 | 0 |
| Case 109 | 12 | 27,020,533  | 27,508,240  | 2 | 1 | 3 | 0 |
| Case 109 | 12 | 27,509,371  | 27,832,498  | 2 | 2 | 4 | 0 |
| Case 109 | 12 | 27,834,595  | 28,129,378  | 2 | 1 | 3 | 0 |
| Case 109 | 12 | 28,132,512  | 28,515,383  | 2 | 2 | 4 | 0 |
| Case 109 | 12 | 28,534,415  | 31,881,141  | 2 | 1 | 3 | 0 |
| Case 109 | 12 | 31,886,971  | 33,146,869  | 2 | 0 | 2 | 1 |
| Case 109 | 12 | 33,148,078  | 34,853,011  | 2 | 1 | 3 | 0 |
| Case 109 | 12 | 37,876,400  | 37,876,400  | 2 | 1 | 3 | 0 |
| Case 109 | 12 | 37,927,114  | 53,242,671  | 2 | 0 | 2 | 1 |
| Case 109 | 12 | 53,242,695  | 53,416,119  | 3 | 0 | 3 | 1 |
| Case 109 | 12 | 53,421,807  | 54,139,932  | 2 | 0 | 2 | 1 |
| Case 109 | 12 | 54,146,451  | 54,634,666  | 3 | 0 | 3 | 1 |
| Case 109 | 12 | 54,649,941  | 56,755,952  | 2 | 0 | 2 | 1 |
| Case 109 | 12 | 56,776,586  | 56,825,355  | 2 | 1 | 3 | 0 |
| Case 109 | 12 | 56,825,379  | 57,058,609  | 2 | 2 | 4 | 0 |
| Case 109 | 12 | 57,064,063  | 57,116,661  | 2 | 1 | 3 | 0 |
| Case 109 | 12 | 57,116,834  | 57,308,975  | 2 | 2 | 4 | 0 |
| Case 109 | 12 | 57,310,085  | 57,441,501  | 2 | 1 | 3 | 0 |
| Case 109 | 12 | 57,442,037  | 57,590,052  | 3 | 1 | 4 | 0 |

|          |    |             |             |   |   |   |   |
|----------|----|-------------|-------------|---|---|---|---|
| Case 109 | 12 | 57,590,856  | 57,656,705  | 2 | 1 | 3 | 0 |
| Case 109 | 12 | 57,662,563  | 57,866,317  | 2 | 2 | 4 | 0 |
| Case 109 | 12 | 57,867,726  | 58,190,185  | 2 | 1 | 3 | 0 |
| Case 109 | 12 | 58,190,202  | 61,613,734  | 2 | 2 | 4 | 0 |
| Case 109 | 12 | 61,622,793  | 61,802,168  | 3 | 2 | 5 | 0 |
| Case 109 | 12 | 61,802,226  | 65,508,788  | 2 | 2 | 4 | 0 |
| Case 109 | 12 | 65,514,266  | 96,513,957  | 2 | 0 | 2 | 1 |
| Case 109 | 12 | 96,521,506  | 96,641,300  | 3 | 0 | 3 | 1 |
| Case 109 | 12 | 96,641,454  | 103,959,184 | 2 | 0 | 2 | 1 |
| Case 109 | 12 | 103,965,032 | 104,074,151 | 3 | 0 | 3 | 1 |
| Case 109 | 12 | 104,076,999 | 106,366,983 | 2 | 0 | 2 | 1 |
| Case 109 | 12 | 106,367,904 | 106,596,176 | 3 | 0 | 3 | 1 |
| Case 109 | 12 | 106,600,420 | 114,188,042 | 2 | 0 | 2 | 1 |
| Case 109 | 12 | 114,190,919 | 114,383,651 | 3 | 0 | 3 | 1 |
| Case 109 | 12 | 114,383,659 | 115,987,793 | 2 | 0 | 2 | 1 |
| Case 109 | 12 | 115,989,581 | 116,278,388 | 3 | 0 | 3 | 1 |
| Case 109 | 12 | 116,279,070 | 122,159,037 | 2 | 0 | 2 | 1 |
| Case 109 | 12 | 122,167,693 | 122,590,228 | 3 | 0 | 3 | 1 |
| Case 109 | 12 | 122,590,465 | 129,530,367 | 2 | 0 | 2 | 1 |
| Case 109 | 12 | 129,530,629 | 129,760,066 | 3 | 0 | 3 | 1 |
| Case 109 | 12 | 129,761,834 | 133,810,935 | 2 | 0 | 2 | 1 |
| Case 109 | 13 | 19,058,717  | 30,564,382  | 3 | 0 | 3 | 1 |
| Case 109 | 13 | 30,570,103  | 30,829,622  | 4 | 0 | 4 | 1 |
| Case 109 | 13 | 30,829,650  | 82,700,330  | 3 | 0 | 3 | 1 |
| Case 109 | 13 | 82,716,886  | 85,017,085  | 1 | 0 | 1 | 0 |
| Case 109 | 13 | 85,021,473  | 115,103,529 | 3 | 0 | 3 | 1 |
| Case 109 | 14 | 19,280,733  | 23,120,536  | 2 | 1 | 3 | 0 |
| Case 109 | 14 | 23,123,431  | 23,235,839  | 1 | 1 | 2 | 0 |
| Case 109 | 14 | 23,235,897  | 23,375,564  | 2 | 1 | 3 | 0 |
| Case 109 | 14 | 23,375,578  | 23,467,755  | 1 | 1 | 2 | 0 |
| Case 109 | 14 | 23,467,839  | 29,410,825  | 2 | 1 | 3 | 0 |
| Case 109 | 14 | 29,444,668  | 29,722,492  | 1 | 1 | 2 | 0 |
| Case 109 | 14 | 29,723,382  | 30,466,162  | 2 | 1 | 3 | 0 |
| Case 109 | 14 | 30,467,236  | 30,649,776  | 1 | 1 | 2 | 0 |
| Case 109 | 14 | 30,651,785  | 31,359,024  | 2 | 1 | 3 | 0 |
| Case 109 | 14 | 31,359,404  | 32,332,071  | 1 | 1 | 2 | 0 |
| Case 109 | 14 | 32,332,377  | 34,879,025  | 2 | 1 | 3 | 0 |
| Case 109 | 14 | 34,886,469  | 35,735,945  | 1 | 1 | 2 | 0 |
| Case 109 | 14 | 35,735,958  | 36,094,588  | 2 | 1 | 3 | 0 |
| Case 109 | 14 | 36,095,947  | 36,190,917  | 1 | 1 | 2 | 0 |
| Case 109 | 14 | 36,191,031  | 37,327,512  | 2 | 1 | 3 | 0 |
| Case 109 | 14 | 37,327,783  | 37,500,250  | 1 | 1 | 2 | 0 |
| Case 109 | 14 | 37,503,880  | 39,577,348  | 2 | 1 | 3 | 0 |
| Case 109 | 14 | 39,580,958  | 39,818,076  | 1 | 1 | 2 | 0 |
| Case 109 | 14 | 39,818,145  | 41,670,102  | 2 | 1 | 3 | 0 |
| Case 109 | 14 | 41,673,195  | 41,776,000  | 1 | 1 | 2 | 0 |
| Case 109 | 14 | 41,782,701  | 45,431,637  | 2 | 1 | 3 | 0 |
| Case 109 | 14 | 45,431,698  | 46,028,940  | 1 | 1 | 2 | 0 |
| Case 109 | 14 | 46,029,290  | 46,893,576  | 2 | 1 | 3 | 0 |
| Case 109 | 14 | 46,894,155  | 47,459,909  | 1 | 1 | 2 | 0 |
| Case 109 | 14 | 47,461,203  | 50,009,048  | 2 | 1 | 3 | 0 |
| Case 109 | 14 | 50,009,589  | 50,392,720  | 1 | 1 | 2 | 0 |
| Case 109 | 14 | 50,404,182  | 50,567,667  | 2 | 1 | 3 | 0 |
| Case 109 | 14 | 50,571,472  | 51,224,294  | 1 | 1 | 2 | 0 |
| Case 109 | 14 | 51,224,356  | 52,910,938  | 2 | 1 | 3 | 0 |
| Case 109 | 14 | 52,921,896  | 53,289,281  | 1 | 1 | 2 | 0 |
| Case 109 | 14 | 53,295,706  | 55,343,879  | 2 | 1 | 3 | 0 |
| Case 109 | 14 | 55,348,118  | 55,705,904  | 1 | 1 | 2 | 0 |
| Case 109 | 14 | 55,710,186  | 56,045,411  | 2 | 1 | 3 | 0 |
| Case 109 | 14 | 56,046,561  | 56,173,687  | 1 | 1 | 2 | 0 |
| Case 109 | 14 | 56,177,363  | 57,040,343  | 2 | 1 | 3 | 0 |



|          |    |            |            |   |   |   |   |
|----------|----|------------|------------|---|---|---|---|
| Case 109 | 14 | 57,040,997 | 57,114,085 | 1 | 1 | 2 | 0 |
| Case 109 | 14 | 57,114,385 | 57,672,715 | 2 | 1 | 3 | 0 |
| Case 109 | 14 | 57,672,871 | 58,012,299 | 1 | 1 | 2 | 0 |
| Case 109 | 14 | 58,012,553 | 58,661,423 | 2 | 1 | 3 | 0 |
| Case 109 | 14 | 58,666,970 | 59,014,522 | 1 | 1 | 2 | 0 |
| Case 109 | 14 | 59,020,666 | 59,813,931 | 2 | 1 | 3 | 0 |
| Case 109 | 14 | 59,815,040 | 60,043,017 | 1 | 1 | 2 | 0 |
| Case 109 | 14 | 60,043,053 | 60,403,314 | 2 | 1 | 3 | 0 |
| Case 109 | 14 | 60,426,228 | 60,938,407 | 1 | 1 | 2 | 0 |
| Case 109 | 14 | 60,945,298 | 61,960,492 | 2 | 1 | 3 | 0 |
| Case 109 | 14 | 61,960,906 | 61,990,061 | 1 | 1 | 2 | 0 |
| Case 109 | 14 | 61,990,861 | 62,803,949 | 2 | 1 | 3 | 0 |
| Case 109 | 14 | 62,806,160 | 63,447,796 | 1 | 1 | 2 | 0 |
| Case 109 | 14 | 63,451,572 | 64,065,726 | 2 | 1 | 3 | 0 |
| Case 109 | 14 | 64,066,015 | 64,653,869 | 1 | 1 | 2 | 0 |
| Case 109 | 14 | 64,654,431 | 64,884,106 | 2 | 1 | 3 | 0 |
| Case 109 | 14 | 64,884,612 | 65,055,953 | 1 | 1 | 2 | 0 |
| Case 109 | 14 | 65,056,007 | 65,698,121 | 2 | 1 | 3 | 0 |
| Case 109 | 14 | 65,701,285 | 66,082,979 | 1 | 1 | 2 | 0 |
| Case 109 | 14 | 66,083,214 | 68,236,320 | 2 | 1 | 3 | 0 |
| Case 109 | 14 | 68,241,793 | 68,510,317 | 1 | 1 | 2 | 0 |
| Case 109 | 14 | 68,551,273 | 68,749,927 | 2 | 1 | 3 | 0 |
| Case 109 | 14 | 68,753,593 | 69,027,866 | 1 | 1 | 2 | 0 |
| Case 109 | 14 | 69,028,603 | 71,444,592 | 2 | 1 | 3 | 0 |
| Case 109 | 14 | 71,444,788 | 71,616,038 | 1 | 1 | 2 | 0 |
| Case 109 | 14 | 71,619,939 | 73,756,226 | 2 | 1 | 3 | 0 |
| Case 109 | 14 | 73,756,299 | 74,167,101 | 1 | 1 | 2 | 0 |
| Case 109 | 14 | 74,178,729 | 74,263,752 | 2 | 1 | 3 | 0 |
| Case 109 | 14 | 74,264,624 | 74,527,349 | 1 | 1 | 2 | 0 |
| Case 109 | 14 | 74,531,485 | 74,884,825 | 2 | 1 | 3 | 0 |
| Case 109 | 14 | 74,888,554 | 74,973,740 | 1 | 1 | 2 | 0 |
| Case 109 | 14 | 74,973,926 | 75,022,277 | 2 | 1 | 3 | 0 |
| Case 109 | 14 | 75,022,332 | 75,568,393 | 1 | 1 | 2 | 0 |
| Case 109 | 14 | 75,572,265 | 75,959,341 | 2 | 1 | 3 | 0 |
| Case 109 | 14 | 75,960,536 | 76,368,504 | 1 | 1 | 2 | 0 |
| Case 109 | 14 | 76,368,544 | 77,628,472 | 2 | 1 | 3 | 0 |
| Case 109 | 14 | 77,629,681 | 77,718,621 | 1 | 1 | 2 | 0 |
| Case 109 | 14 | 77,719,346 | 77,795,668 | 2 | 1 | 3 | 0 |
| Case 109 | 14 | 77,796,641 | 78,241,374 | 1 | 1 | 2 | 0 |
| Case 109 | 14 | 78,247,282 | 79,367,396 | 2 | 1 | 3 | 0 |
| Case 109 | 14 | 79,375,346 | 79,682,114 | 1 | 1 | 2 | 0 |
| Case 109 | 14 | 79,690,398 | 80,551,109 | 2 | 1 | 3 | 0 |
| Case 109 | 14 | 80,554,281 | 81,405,846 | 1 | 1 | 2 | 0 |
| Case 109 | 14 | 81,406,683 | 81,631,721 | 2 | 1 | 3 | 0 |
| Case 109 | 14 | 81,637,074 | 81,743,712 | 1 | 1 | 2 | 0 |
| Case 109 | 14 | 81,743,718 | 81,964,410 | 2 | 1 | 3 | 0 |
| Case 109 | 14 | 81,964,814 | 82,314,484 | 1 | 1 | 2 | 0 |
| Case 109 | 14 | 82,337,322 | 82,573,285 | 2 | 1 | 3 | 0 |
| Case 109 | 14 | 82,580,335 | 83,033,885 | 1 | 1 | 2 | 0 |
| Case 109 | 14 | 83,034,512 | 83,903,366 | 2 | 1 | 3 | 0 |
| Case 109 | 14 | 83,905,804 | 84,174,088 | 1 | 1 | 2 | 0 |
| Case 109 | 14 | 84,175,805 | 87,913,934 | 2 | 1 | 3 | 0 |
| Case 109 | 14 | 87,924,278 | 88,273,845 | 1 | 1 | 2 | 0 |
| Case 109 | 14 | 88,275,924 | 88,794,114 | 2 | 1 | 3 | 0 |
| Case 109 | 14 | 88,798,048 | 89,410,553 | 1 | 1 | 2 | 0 |
| Case 109 | 14 | 89,412,182 | 90,031,107 | 2 | 1 | 3 | 0 |
| Case 109 | 14 | 90,031,144 | 90,547,714 | 1 | 1 | 2 | 0 |
| Case 109 | 14 | 90,550,344 | 91,324,459 | 2 | 1 | 3 | 0 |
| Case 109 | 14 | 91,332,366 | 91,690,316 | 1 | 1 | 2 | 0 |
| Case 109 | 14 | 91,691,074 | 91,914,979 | 2 | 1 | 3 | 0 |
| Case 109 | 14 | 91,923,002 | 92,278,829 | 1 | 1 | 2 | 0 |

|          |    |             |             |   |   |   |   |
|----------|----|-------------|-------------|---|---|---|---|
| Case 109 | 14 | 92,279,983  | 92,403,294  | 2 | 1 | 3 | 0 |
| Case 109 | 14 | 92,403,660  | 92,668,898  | 1 | 1 | 2 | 0 |
| Case 109 | 14 | 92,671,063  | 93,170,993  | 2 | 1 | 3 | 0 |
| Case 109 | 14 | 93,170,994  | 93,329,692  | 1 | 1 | 2 | 0 |
| Case 109 | 14 | 93,331,734  | 93,418,952  | 2 | 1 | 3 | 0 |
| Case 109 | 14 | 93,419,535  | 94,053,005  | 1 | 1 | 2 | 0 |
| Case 109 | 14 | 94,058,279  | 94,585,852  | 2 | 1 | 3 | 0 |
| Case 109 | 14 | 94,586,005  | 94,762,879  | 1 | 1 | 2 | 0 |
| Case 109 | 14 | 94,763,493  | 95,518,143  | 2 | 1 | 3 | 0 |
| Case 109 | 14 | 95,518,762  | 95,688,092  | 1 | 1 | 2 | 0 |
| Case 109 | 14 | 95,688,105  | 96,739,847  | 2 | 1 | 3 | 0 |
| Case 109 | 14 | 96,739,874  | 97,048,612  | 1 | 1 | 2 | 0 |
| Case 109 | 14 | 97,053,924  | 97,257,326  | 2 | 1 | 3 | 0 |
| Case 109 | 14 | 97,258,240  | 97,380,598  | 1 | 1 | 2 | 0 |
| Case 109 | 14 | 97,388,444  | 98,157,982  | 2 | 1 | 3 | 0 |
| Case 109 | 14 | 98,158,504  | 98,225,377  | 1 | 1 | 2 | 0 |
| Case 109 | 14 | 98,229,487  | 100,792,507 | 2 | 1 | 3 | 0 |
| Case 109 | 14 | 100,792,537 | 100,994,045 | 1 | 1 | 2 | 0 |
| Case 109 | 14 | 100,996,293 | 107,287,663 | 2 | 1 | 3 | 0 |
| Case 109 | 15 | 20,034,919  | 20,212,798  | 2 | 0 | 2 | 1 |
| Case 109 | 15 | 20,612,840  | 22,750,305  | 3 | 0 | 3 | 1 |
| Case 109 | 15 | 22,753,733  | 102,461,162 | 2 | 0 | 2 | 1 |
| Case 109 | 16 | 88,165      | 10,868,904  | 3 | 0 | 3 | 1 |
| Case 109 | 16 | 10,871,313  | 11,337,805  | 4 | 0 | 4 | 1 |
| Case 109 | 16 | 11,340,579  | 35,285,582  | 3 | 0 | 3 | 1 |
| Case 109 | 16 | 46,450,037  | 55,845,351  | 3 | 0 | 3 | 1 |
| Case 109 | 16 | 55,850,708  | 55,866,937  | 2 | 0 | 2 | 1 |
| Case 109 | 16 | 55,867,581  | 71,478,888  | 3 | 0 | 3 | 1 |
| Case 109 | 16 | 71,480,239  | 71,791,798  | 4 | 0 | 4 | 1 |
| Case 109 | 16 | 71,800,045  | 78,784,233  | 3 | 0 | 3 | 1 |
| Case 109 | 16 | 78,787,891  | 78,839,835  | 1 | 0 | 1 | 0 |
| Case 109 | 16 | 78,840,745  | 78,870,954  | 2 | 0 | 2 | 1 |
| Case 109 | 16 | 78,871,429  | 78,960,323  | 1 | 0 | 1 | 0 |
| Case 109 | 16 | 78,961,207  | 79,053,610  | 2 | 0 | 2 | 1 |
| Case 109 | 16 | 79,053,912  | 79,076,706  | 1 | 0 | 1 | 0 |
| Case 109 | 16 | 79,076,810  | 79,173,748  | 2 | 0 | 2 | 1 |
| Case 109 | 16 | 79,175,411  | 79,229,465  | 1 | 0 | 1 | 0 |
| Case 109 | 16 | 79,232,446  | 79,287,548  | 2 | 0 | 2 | 1 |
| Case 109 | 16 | 79,288,234  | 79,311,132  | 1 | 0 | 1 | 0 |
| Case 109 | 16 | 79,315,897  | 79,362,824  | 2 | 0 | 2 | 1 |
| Case 109 | 16 | 79,363,079  | 79,494,293  | 1 | 0 | 1 | 0 |
| Case 109 | 16 | 79,495,758  | 79,592,020  | 2 | 0 | 2 | 1 |
| Case 109 | 16 | 79,594,409  | 79,621,818  | 1 | 0 | 1 | 0 |
| Case 109 | 16 | 79,627,282  | 79,706,540  | 2 | 0 | 2 | 1 |
| Case 109 | 16 | 79,708,901  | 79,941,572  | 1 | 0 | 1 | 0 |
| Case 109 | 16 | 79,942,562  | 80,188,337  | 2 | 0 | 2 | 1 |
| Case 109 | 16 | 80,189,487  | 80,362,213  | 1 | 0 | 1 | 0 |
| Case 109 | 16 | 80,364,475  | 80,415,330  | 2 | 0 | 2 | 1 |
| Case 109 | 16 | 80,415,890  | 80,471,213  | 1 | 0 | 1 | 0 |
| Case 109 | 16 | 80,474,617  | 80,546,183  | 2 | 0 | 2 | 1 |
| Case 109 | 16 | 80,546,497  | 80,584,435  | 1 | 0 | 1 | 0 |
| Case 109 | 16 | 80,586,213  | 80,773,425  | 2 | 0 | 2 | 1 |
| Case 109 | 16 | 80,779,076  | 81,079,641  | 1 | 0 | 1 | 0 |
| Case 109 | 16 | 81,079,681  | 81,095,716  | 2 | 0 | 2 | 1 |
| Case 109 | 16 | 81,097,356  | 81,148,438  | 1 | 0 | 1 | 0 |
| Case 109 | 16 | 81,149,302  | 81,171,635  | 2 | 0 | 2 | 1 |
| Case 109 | 16 | 81,172,338  | 81,183,468  | 1 | 0 | 1 | 0 |
| Case 109 | 16 | 81,183,492  | 81,369,598  | 2 | 0 | 2 | 1 |
| Case 109 | 16 | 81,369,811  | 81,426,426  | 1 | 0 | 1 | 0 |
| Case 109 | 16 | 81,427,104  | 82,033,708  | 2 | 0 | 2 | 1 |
| Case 109 | 16 | 82,033,810  | 82,273,372  | 1 | 0 | 1 | 0 |

|          |    |            |            |   |   |   |   |
|----------|----|------------|------------|---|---|---|---|
| Case 109 | 16 | 82,274,265 | 82,447,854 | 2 | 0 | 2 | 1 |
| Case 109 | 16 | 82,451,159 | 82,489,125 | 1 | 0 | 1 | 0 |
| Case 109 | 16 | 82,489,484 | 82,826,944 | 2 | 0 | 2 | 1 |
| Case 109 | 16 | 82,827,663 | 82,965,065 | 1 | 0 | 1 | 0 |
| Case 109 | 16 | 82,965,354 | 83,076,634 | 2 | 0 | 2 | 1 |
| Case 109 | 16 | 83,076,742 | 83,192,172 | 1 | 0 | 1 | 0 |
| Case 109 | 16 | 83,193,262 | 83,289,317 | 2 | 0 | 2 | 1 |
| Case 109 | 16 | 83,289,483 | 83,417,673 | 1 | 0 | 1 | 0 |
| Case 109 | 16 | 83,419,552 | 83,549,820 | 2 | 0 | 2 | 1 |
| Case 109 | 16 | 83,552,798 | 83,656,037 | 1 | 0 | 1 | 0 |
| Case 109 | 16 | 83,656,056 | 83,756,017 | 2 | 0 | 2 | 1 |
| Case 109 | 16 | 83,756,215 | 83,817,069 | 1 | 0 | 1 | 0 |
| Case 109 | 16 | 83,817,519 | 83,981,250 | 2 | 0 | 2 | 1 |
| Case 109 | 16 | 83,983,071 | 84,029,556 | 1 | 0 | 1 | 0 |
| Case 109 | 16 | 84,030,289 | 84,094,363 | 2 | 0 | 2 | 1 |
| Case 109 | 16 | 84,094,417 | 84,198,906 | 1 | 0 | 1 | 0 |
| Case 109 | 16 | 84,199,444 | 84,211,969 | 2 | 0 | 2 | 1 |
| Case 109 | 16 | 84,212,597 | 84,230,339 | 1 | 0 | 1 | 0 |
| Case 109 | 16 | 84,230,500 | 84,495,715 | 2 | 0 | 2 | 1 |
| Case 109 | 16 | 84,495,733 | 84,514,341 | 1 | 0 | 1 | 0 |
| Case 109 | 16 | 84,515,852 | 84,520,571 | 2 | 0 | 2 | 1 |
| Case 109 | 16 | 84,522,890 | 84,575,432 | 1 | 0 | 1 | 0 |
| Case 109 | 16 | 84,575,602 | 84,721,401 | 2 | 0 | 2 | 1 |
| Case 109 | 16 | 84,724,256 | 84,832,998 | 1 | 0 | 1 | 0 |
| Case 109 | 16 | 84,839,954 | 85,082,786 | 2 | 0 | 2 | 1 |
| Case 109 | 16 | 85,092,575 | 85,175,235 | 1 | 0 | 1 | 0 |
| Case 109 | 16 | 85,175,309 | 85,711,880 | 2 | 0 | 2 | 1 |
| Case 109 | 16 | 85,711,915 | 85,931,504 | 1 | 0 | 1 | 0 |
| Case 109 | 16 | 85,932,988 | 85,979,346 | 2 | 0 | 2 | 1 |
| Case 109 | 16 | 85,980,968 | 86,095,113 | 1 | 0 | 1 | 0 |
| Case 109 | 16 | 86,096,394 | 86,127,682 | 2 | 0 | 2 | 1 |
| Case 109 | 16 | 86,129,507 | 86,168,801 | 1 | 0 | 1 | 0 |
| Case 109 | 16 | 86,169,068 | 86,445,085 | 2 | 0 | 2 | 1 |
| Case 109 | 16 | 86,445,827 | 86,509,307 | 1 | 0 | 1 | 0 |
| Case 109 | 16 | 86,511,149 | 86,558,534 | 2 | 0 | 2 | 1 |
| Case 109 | 16 | 86,561,602 | 86,690,125 | 1 | 0 | 1 | 0 |
| Case 109 | 16 | 86,692,288 | 87,430,239 | 2 | 0 | 2 | 1 |
| Case 109 | 16 | 87,432,453 | 87,672,493 | 1 | 0 | 1 | 0 |
| Case 109 | 16 | 87,675,119 | 87,792,392 | 2 | 0 | 2 | 1 |
| Case 109 | 16 | 87,795,580 | 87,874,140 | 1 | 0 | 1 | 0 |
| Case 109 | 16 | 87,874,265 | 88,462,550 | 2 | 0 | 2 | 1 |
| Case 109 | 16 | 88,464,220 | 88,719,770 | 1 | 0 | 1 | 0 |
| Case 109 | 16 | 88,721,128 | 88,741,504 | 2 | 0 | 2 | 1 |
| Case 109 | 16 | 88,743,485 | 89,057,561 | 1 | 0 | 1 | 0 |
| Case 109 | 16 | 89,066,527 | 89,220,846 | 2 | 0 | 2 | 1 |
| Case 109 | 16 | 89,221,795 | 89,287,559 | 1 | 0 | 1 | 0 |
| Case 109 | 16 | 89,287,857 | 89,294,008 | 2 | 0 | 2 | 1 |
| Case 109 | 16 | 89,294,027 | 89,347,372 | 1 | 0 | 1 | 0 |
| Case 109 | 16 | 89,347,431 | 89,350,431 | 2 | 0 | 2 | 1 |
| Case 109 | 16 | 89,350,710 | 89,712,440 | 1 | 0 | 1 | 0 |
| Case 109 | 16 | 89,712,889 | 89,737,329 | 2 | 0 | 2 | 1 |
| Case 109 | 16 | 89,737,463 | 89,814,807 | 1 | 0 | 1 | 0 |
| Case 109 | 16 | 89,815,152 | 89,858,417 | 2 | 0 | 2 | 1 |
| Case 109 | 16 | 89,862,202 | 89,985,778 | 1 | 0 | 1 | 0 |
| Case 109 | 16 | 89,985,799 | 90,034,458 | 2 | 0 | 2 | 1 |
| Case 109 | 16 | 90,035,141 | 90,095,620 | 1 | 0 | 1 | 0 |
| Case 109 | 16 | 90,095,654 | 90,274,695 | 2 | 0 | 2 | 1 |
| Case 109 | 17 | 11,885     | 4,120,933  | 2 | 0 | 2 | 1 |
| Case 109 | 17 | 4,138,937  | 5,713,820  | 3 | 0 | 3 | 1 |
| Case 109 | 17 | 5,717,679  | 5,982,293  | 4 | 0 | 4 | 1 |
| Case 109 | 17 | 5,983,993  | 7,681,492  | 3 | 0 | 3 | 1 |

|          |    |            |            |   |   |   |   |
|----------|----|------------|------------|---|---|---|---|
| Case 109 | 17 | 7,681,731  | 22,242,355 | 2 | 0 | 2 | 1 |
| Case 109 | 17 | 25,268,142 | 25,268,142 | 2 | 0 | 2 | 1 |
| Case 109 | 17 | 25,295,032 | 26,116,637 | 2 | 1 | 3 | 0 |
| Case 109 | 17 | 26,116,848 | 26,327,892 | 2 | 2 | 4 | 0 |
| Case 109 | 17 | 26,329,191 | 28,419,090 | 2 | 1 | 3 | 0 |
| Case 109 | 17 | 28,430,303 | 28,506,112 | 2 | 2 | 4 | 0 |
| Case 109 | 17 | 28,506,253 | 29,114,229 | 2 | 1 | 3 | 0 |
| Case 109 | 17 | 29,114,463 | 29,734,707 | 2 | 2 | 4 | 0 |
| Case 109 | 17 | 29,738,601 | 31,298,706 | 2 | 1 | 3 | 0 |
| Case 109 | 17 | 31,306,153 | 31,705,985 | 2 | 2 | 4 | 0 |
| Case 109 | 17 | 31,706,265 | 31,746,526 | 2 | 1 | 3 | 0 |
| Case 109 | 17 | 31,751,013 | 31,817,842 | 2 | 2 | 4 | 0 |
| Case 109 | 17 | 31,819,214 | 32,099,219 | 2 | 1 | 3 | 0 |
| Case 109 | 17 | 32,099,745 | 32,845,126 | 2 | 2 | 4 | 0 |
| Case 109 | 17 | 32,847,040 | 34,959,298 | 2 | 1 | 3 | 0 |
| Case 109 | 17 | 34,959,346 | 35,113,905 | 2 | 2 | 4 | 0 |
| Case 109 | 17 | 35,116,542 | 35,454,892 | 2 | 1 | 3 | 0 |
| Case 109 | 17 | 35,454,919 | 36,776,836 | 2 | 2 | 4 | 0 |
| Case 109 | 17 | 36,776,981 | 37,687,522 | 2 | 1 | 3 | 0 |
| Case 109 | 17 | 37,696,852 | 37,840,860 | 2 | 2 | 4 | 0 |
| Case 109 | 17 | 37,840,912 | 37,985,732 | 2 | 1 | 3 | 0 |
| Case 109 | 17 | 38,010,815 | 38,131,187 | 2 | 2 | 4 | 0 |
| Case 109 | 17 | 38,139,024 | 38,716,360 | 2 | 1 | 3 | 0 |
| Case 109 | 17 | 38,717,896 | 38,951,494 | 2 | 2 | 4 | 0 |
| Case 109 | 17 | 38,953,242 | 41,134,412 | 2 | 1 | 3 | 0 |
| Case 109 | 17 | 41,137,501 | 43,030,679 | 2 | 2 | 4 | 0 |
| Case 109 | 17 | 43,031,392 | 43,191,656 | 4 | 1 | 5 | 0 |
| Case 109 | 17 | 43,192,529 | 43,570,226 | 3 | 1 | 4 | 0 |
| Case 109 | 17 | 43,685,925 | 57,941,166 | 2 | 0 | 2 | 1 |
| Case 109 | 17 | 57,944,072 | 63,226,943 | 2 | 1 | 3 | 0 |
| Case 109 | 17 | 63,227,804 | 63,527,220 | 2 | 2 | 4 | 0 |
| Case 109 | 17 | 63,528,950 | 74,383,648 | 2 | 1 | 3 | 0 |
| Case 109 | 17 | 74,383,678 | 79,093,324 | 3 | 1 | 4 | 0 |
| Case 109 | 17 | 79,094,122 | 79,098,176 | 3 | 2 | 5 | 0 |
| Case 109 | 17 | 79,098,773 | 80,048,811 | 3 | 1 | 4 | 0 |
| Case 109 | 17 | 80,048,859 | 81,060,040 | 2 | 2 | 4 | 0 |
| Case 109 | 18 | 87,505     | 3,370,474  | 2 | 0 | 2 | 1 |
| Case 109 | 18 | 3,371,212  | 3,445,826  | 1 | 0 | 1 | 0 |
| Case 109 | 18 | 3,448,762  | 3,604,788  | 2 | 0 | 2 | 1 |
| Case 109 | 18 | 3,606,272  | 3,770,469  | 1 | 0 | 1 | 0 |
| Case 109 | 18 | 3,776,564  | 3,848,826  | 2 | 0 | 2 | 1 |
| Case 109 | 18 | 3,860,475  | 4,003,975  | 1 | 0 | 1 | 0 |
| Case 109 | 18 | 4,004,514  | 15,375,878 | 2 | 0 | 2 | 1 |
| Case 109 | 18 | 18,520,354 | 22,239,376 | 2 | 0 | 2 | 1 |
| Case 109 | 18 | 22,239,440 | 22,430,986 | 3 | 0 | 3 | 1 |
| Case 109 | 18 | 22,433,552 | 34,877,961 | 2 | 0 | 2 | 1 |
| Case 109 | 18 | 34,878,226 | 35,077,028 | 3 | 0 | 3 | 1 |
| Case 109 | 18 | 35,078,723 | 37,981,499 | 2 | 0 | 2 | 1 |
| Case 109 | 18 | 37,984,800 | 78,015,180 | 2 | 1 | 3 | 0 |
| Case 109 | 19 | 260,912    | 20,036,176 | 2 | 0 | 2 | 1 |
| Case 109 | 19 | 20,044,186 | 20,046,102 | 1 | 0 | 1 | 0 |
| Case 109 | 19 | 20,054,823 | 23,829,737 | 2 | 0 | 2 | 1 |
| Case 109 | 19 | 23,837,145 | 23,937,693 | 1 | 0 | 1 | 0 |
| Case 109 | 19 | 23,938,402 | 24,629,285 | 2 | 0 | 2 | 1 |
| Case 109 | 19 | 27,732,159 | 27,919,724 | 2 | 0 | 2 | 1 |
| Case 109 | 19 | 27,928,613 | 47,428,968 | 3 | 0 | 3 | 1 |
| Case 109 | 19 | 47,447,158 | 54,891,185 | 2 | 0 | 2 | 1 |
| Case 109 | 19 | 54,896,877 | 54,921,227 | 1 | 0 | 1 | 0 |
| Case 109 | 19 | 54,930,361 | 59,097,160 | 2 | 0 | 2 | 1 |
| Case 109 | 20 | 63,244     | 5,903,166  | 3 | 1 | 4 | 0 |
| Case 109 | 20 | 5,903,223  | 5,904,558  | 2 | 1 | 3 | 0 |

|          |    |            |            |   |   |   |   |
|----------|----|------------|------------|---|---|---|---|
| Case 109 | 20 | 5,905,779  | 6,091,054  | 3 | 1 | 4 | 0 |
| Case 109 | 20 | 6,091,175  | 6,217,600  | 3 | 2 | 5 | 0 |
| Case 109 | 20 | 6,224,405  | 6,822,165  | 3 | 1 | 4 | 0 |
| Case 109 | 20 | 6,826,062  | 9,487,033  | 3 | 2 | 5 | 0 |
| Case 109 | 20 | 9,489,944  | 10,282,027 | 3 | 1 | 4 | 0 |
| Case 109 | 20 | 10,283,950 | 10,392,595 | 3 | 2 | 5 | 0 |
| Case 109 | 20 | 10,393,237 | 10,863,502 | 3 | 1 | 4 | 0 |
| Case 109 | 20 | 10,864,326 | 13,225,350 | 3 | 2 | 5 | 0 |
| Case 109 | 20 | 13,229,326 | 13,782,229 | 3 | 1 | 4 | 0 |
| Case 109 | 20 | 13,782,279 | 15,434,198 | 3 | 2 | 5 | 0 |
| Case 109 | 20 | 15,434,757 | 15,548,813 | 3 | 1 | 4 | 0 |
| Case 109 | 20 | 15,549,323 | 16,146,742 | 3 | 2 | 5 | 0 |
| Case 109 | 20 | 16,148,469 | 16,787,818 | 3 | 1 | 4 | 0 |
| Case 109 | 20 | 16,788,003 | 17,110,620 | 3 | 2 | 5 | 0 |
| Case 109 | 20 | 17,114,299 | 26,293,985 | 3 | 1 | 4 | 0 |
| Case 109 | 20 | 29,425,357 | 36,788,191 | 3 | 1 | 4 | 0 |
| Case 109 | 20 | 36,796,159 | 38,773,308 | 2 | 2 | 4 | 0 |
| Case 109 | 20 | 38,774,289 | 38,872,419 | 3 | 2 | 5 | 0 |
| Case 109 | 20 | 38,873,093 | 51,870,244 | 2 | 2 | 4 | 0 |
| Case 109 | 20 | 51,870,325 | 51,881,039 | 2 | 1 | 3 | 0 |
| Case 109 | 20 | 51,884,213 | 52,192,308 | 2 | 2 | 4 | 0 |
| Case 109 | 20 | 52,192,415 | 52,213,053 | 2 | 1 | 3 | 0 |
| Case 109 | 20 | 52,220,643 | 54,183,661 | 2 | 2 | 4 | 0 |
| Case 109 | 20 | 54,184,214 | 54,289,508 | 3 | 2 | 5 | 0 |
| Case 109 | 20 | 54,297,446 | 62,729,943 | 2 | 2 | 4 | 0 |
| Case 109 | 20 | 62,729,967 | 62,948,788 | 2 | 1 | 3 | 0 |
| Case 109 | 21 | 10,827,533 | 10,971,337 | 1 | 1 | 2 | 0 |
| Case 109 | 21 | 14,368,320 | 25,146,499 | 1 | 1 | 2 | 0 |
| Case 109 | 21 | 25,148,429 | 25,170,883 | 1 | 0 | 1 | 0 |
| Case 109 | 21 | 25,174,651 | 45,877,291 | 1 | 1 | 2 | 0 |
| Case 109 | 21 | 45,878,384 | 45,953,755 | 2 | 1 | 3 | 0 |
| Case 109 | 21 | 45,953,773 | 48,100,155 | 1 | 1 | 2 | 0 |
| Case 109 | 22 | 16,114,244 | 44,646,663 | 2 | 1 | 3 | 0 |
| Case 109 | 22 | 44,652,157 | 45,309,808 | 1 | 0 | 1 | 0 |
| Case 109 | 22 | 45,309,820 | 45,312,474 | 2 | 0 | 2 | 1 |
| Case 109 | 22 | 45,312,801 | 45,795,041 | 1 | 0 | 1 | 0 |
| Case 109 | 22 | 45,802,354 | 46,652,516 | 2 | 1 | 3 | 0 |
| Case 109 | 22 | 46,652,612 | 46,657,713 | 1 | 1 | 2 | 0 |
| Case 109 | 22 | 46,657,881 | 51,195,728 | 2 | 1 | 3 | 0 |

<sup>1</sup>Based on the reference human genome from UCSC human genome 19 (hg19). <sup>2</sup>Copy numbers of "A allele" and "B allele" were predicted by GPHMM (<http://bioinformatics.ustc.edu.cn/gphmm/> [Ref. 29]) . <sup>3</sup>1, positive; 0, negative.

**Supplementary Table 9.** Genes located on the aberrated chromosomal segments showing gains or losses in more than 15% of cancers belonging to Cluster A, B1 and B2

(A) Genes located on the aberrated chromosomal segments in more than 15% of (2 or more) cancers belonging to Cluster A (n=12)

| Gene symbol <sup>1</sup> | Chromosome | National Center for<br>Biotechnology Information<br>(NCBI) Gene ID | Number of patients showing copy number alterations |                    |                    |                    |
|--------------------------|------------|--------------------------------------------------------------------|----------------------------------------------------|--------------------|--------------------|--------------------|
|                          |            |                                                                    | Gain                                               |                    | Loss               |                    |
|                          |            |                                                                    | ASCAT <sup>2</sup>                                 | GPHMM <sup>3</sup> | ASCAT <sup>2</sup> | GPHMM <sup>3</sup> |
| <i>ABRA</i>              | 8          | 137735                                                             | 3                                                  | 2                  | 0                  | 0                  |
| <i>ADCY8</i>             | 8          | 114                                                                | 2                                                  | 2                  | 0                  | 0                  |
| <i>ANGPT1</i>            | 8          | 284                                                                | 3                                                  | 2                  | 0                  | 0                  |
| <i>ANKRD46</i>           | 8          | 157567                                                             | 3                                                  | 2                  | 0                  | 0                  |
| <i>ASPH</i>              | 8          | 444                                                                | 3                                                  | 2                  | 0                  | 0                  |
| <i>ATAD2</i>             | 8          | 29028                                                              | 3                                                  | 2                  | 0                  | 0                  |
| <i>ATP6V0CP3</i>         | 6          | 442211                                                             | 2                                                  | 2                  | 0                  | 0                  |
| <i>ATP6V1C1</i>          | 8          | 528                                                                | 3                                                  | 2                  | 0                  | 0                  |
| <i>AZIN1-AS1</i>         | 8          | 100506753                                                          | 3                                                  | 2                  | 0                  | 0                  |
| <i>BAALC</i>             | 8          | 79870                                                              | 3                                                  | 2                  | 0                  | 0                  |
| <i>BAALC-AS1</i>         | 8          | 100499183                                                          | 3                                                  | 2                  | 0                  | 0                  |
| <i>BAALC-AS2</i>         | 8          | 157556                                                             | 3                                                  | 2                  | 0                  | 0                  |
| <i>BICRAL</i>            | 6          | 23506                                                              | 2                                                  | 2                  | 0                  | 0                  |
| <i>C19orf12</i>          | 19         | 83636                                                              | 2                                                  | 2                  | 0                  | 0                  |
| <i>C6orf226</i>          | 6          | 441150                                                             | 2                                                  | 2                  | 0                  | 0                  |
| <i>C8orf76</i>           | 8          | 84933                                                              | 3                                                  | 2                  | 0                  | 0                  |
| <i>CALB1</i>             | 8          | 793                                                                | 3                                                  | 2                  | 0                  | 0                  |
| <i>CASC11</i>            | 8          | 100270680                                                          | 3                                                  | 2                  | 0                  | 0                  |
| <i>CASC19</i>            | 8          | 103021165                                                          | 3                                                  | 2                  | 0                  | 0                  |
| <i>CASC21</i>            | 8          | 103021164                                                          | 3                                                  | 2                  | 0                  | 0                  |
| <i>CASC8</i>             | 8          | 727677                                                             | 3                                                  | 2                  | 0                  | 0                  |
| <i>CCAT1</i>             | 8          | 100507056                                                          | 3                                                  | 2                  | 0                  | 0                  |
| <i>CCAT2</i>             | 8          | 101805488                                                          | 3                                                  | 2                  | 0                  | 0                  |
| <i>CCDC26</i>            | 8          | 137196                                                             | 2                                                  | 2                  | 0                  | 0                  |
| <i>CCN3</i>              | 8          | 4856                                                               | 3                                                  | 2                  | 0                  | 0                  |
| <i>CCNE1</i>             | 19         | 898                                                                | 2                                                  | 2                  | 0                  | 0                  |
| <i>CDC5L</i>             | 6          | 988                                                                | 2                                                  | 2                  | 0                  | 0                  |
| <i>CLVS1</i>             | 8          | 157807                                                             | 3                                                  | 2                  | 0                  | 0                  |
| <i>CNPY3</i>             | 6          | 10695                                                              | 2                                                  | 2                  | 0                  | 0                  |
| <i>CNPY3-GNMT</i>        | 6          | 107080644                                                          | 2                                                  | 2                  | 0                  | 0                  |
| <i>COL14A1</i>           | 8          | 7373                                                               | 3                                                  | 2                  | 0                  | 0                  |
| <i>COLEC10</i>           | 8          | 10584                                                              | 3                                                  | 3                  | 0                  | 0                  |
| <i>COX6C</i>             | 8          | 1345                                                               | 3                                                  | 3                  | 0                  | 0                  |
| <i>CPLANE1</i>           | 5          | 65250                                                              | 2                                                  | 3                  | 0                  | 0                  |
| <i>CSMD3</i>             | 8          | 114788                                                             | 3                                                  | 2                  | 0                  | 0                  |
| <i>CTHRC1</i>            | 8          | 115908                                                             | 3                                                  | 2                  | 0                  | 0                  |
| <i>DCAF13</i>            | 8          | 25879                                                              | 3                                                  | 2                  | 0                  | 0                  |
| <i>DECR1</i>             | 8          | 1666                                                               | 3                                                  | 2                  | 0                  | 0                  |
| <i>DEPTOR</i>            | 8          | 64798                                                              | 3                                                  | 2                  | 0                  | 0                  |
| <i>DSCC1</i>             | 8          | 79075                                                              | 3                                                  | 2                  | 0                  | 0                  |
| <i>E2F5</i>              | 8          | 1875                                                               | 3                                                  | 2                  | 0                  | 0                  |
| <i>EFR3A</i>             | 8          | 23167                                                              | 2                                                  | 2                  | 0                  | 0                  |
| <i>EIF3E</i>             | 8          | 3646                                                               | 3                                                  | 2                  | 0                  | 0                  |

|                     |    |           |   |   |   |   |
|---------------------|----|-----------|---|---|---|---|
| <i>ELOC</i>         | 8  | 6921      | 3 | 2 | 0 | 0 |
| <i>EMC2</i>         | 8  | 9694      | 3 | 2 | 0 | 0 |
| <i>ENPP2</i>        | 8  | 5168      | 3 | 2 | 0 | 0 |
| <i>EPPK1</i>        | 8  | 83481     | 2 | 2 | 0 | 0 |
| <i>ERBB2</i>        | 17 | 2064      | 2 | 2 | 0 | 0 |
| <i>EXT1</i>         | 8  | 2131      | 3 | 3 | 0 | 0 |
| <i>FBXO43</i>       | 8  | 286151    | 3 | 3 | 0 | 0 |
| <i>FHIT</i>         | 3  | 2272      | 0 | 0 | 4 | 5 |
| <i>FLJ42969</i>     | 8  | 441374    | 3 | 2 | 0 | 0 |
| <i>FZD6</i>         | 8  | 8323      | 3 | 2 | 0 | 0 |
| <i>GGH</i>          | 8  | 8836      | 3 | 2 | 0 | 0 |
| <i>GNMT</i>         | 6  | 27232     | 2 | 2 | 0 | 0 |
| <i>GRB7</i>         | 17 | 2886      | 2 | 2 | 0 | 0 |
| <i>GRHL2</i>        | 8  | 79977     | 3 | 2 | 0 | 0 |
| <i>HAS2</i>         | 8  | 3037      | 3 | 2 | 0 | 0 |
| <i>HAS2-AS1</i>     | 8  | 594842    | 3 | 2 | 0 | 0 |
| <i>IKZF3</i>        | 17 | 22806     | 2 | 2 | 0 | 0 |
| <i>KCNB2</i>        | 8  | 9312      | 3 | 2 | 0 | 0 |
| <i>KCNV1</i>        | 8  | 27012     | 3 | 3 | 0 | 0 |
| <i>KRT14</i>        | 17 | 3861      | 2 | 2 | 0 | 0 |
| <i>KRT16</i>        | 17 | 3868      | 2 | 2 | 0 | 0 |
| <i>KRT23</i>        | 17 | 25984     | 2 | 2 | 0 | 0 |
| <i>KRT33A</i>       | 17 | 3883      | 2 | 2 | 0 | 0 |
| <i>KRT33B</i>       | 17 | 3884      | 2 | 2 | 0 | 0 |
| <i>KRT39</i>        | 17 | 390792    | 2 | 2 | 0 | 0 |
| <i>KRT40</i>        | 17 | 125115    | 2 | 2 | 0 | 0 |
| <i>KRTAP1-5</i>     | 17 | 83895     | 2 | 2 | 0 | 0 |
| <i>KRTAP16-1</i>    | 17 | 100505753 | 2 | 2 | 0 | 0 |
| <i>KRTAP17-1</i>    | 17 | 83902     | 2 | 2 | 0 | 0 |
| <i>KRTAP29-1</i>    | 17 | 100533177 | 2 | 2 | 0 | 0 |
| <i>KRTAP3-1</i>     | 17 | 83896     | 2 | 2 | 0 | 0 |
| <i>KRTAP3-2</i>     | 17 | 83897     | 2 | 2 | 0 | 0 |
| <i>KRTAP3-3</i>     | 17 | 85293     | 2 | 2 | 0 | 0 |
| <i>LINC00534</i>    | 8  | 100874052 | 3 | 2 | 0 | 0 |
| <i>LINC00824</i>    | 8  | 101927774 | 3 | 2 | 0 | 0 |
| <i>LINC00861</i>    | 8  | 100130231 | 3 | 2 | 0 | 0 |
| <i>LINC00976</i>    | 8  | 106144608 | 3 | 2 | 0 | 0 |
| <i>LINC00977</i>    | 8  | 728724    | 3 | 2 | 0 | 0 |
| <i>LINC01181</i>    | 8  | 379034    | 3 | 2 | 0 | 0 |
| <i>LINC01419</i>    | 8  | 103352670 | 3 | 2 | 0 | 0 |
| <i>LINC01608</i>    | 8  | 101927459 | 3 | 2 | 0 | 0 |
| <i>LINC01609</i>    | 8  | 101927487 | 3 | 2 | 0 | 0 |
| <i>LINC01617</i>    | 8  | 101926947 | 3 | 2 | 0 | 0 |
| <i>LINC02055</i>    | 8  | 107986980 | 2 | 2 | 0 | 0 |
| <i>LINC02155</i>    | 8  | 111082988 | 3 | 2 | 0 | 0 |
| <i>LINC02237</i>    | 8  | 105375706 | 3 | 2 | 0 | 0 |
| <i>LMBRD2</i>       | 5  | 92255     | 2 | 2 | 0 | 0 |
| <i>LOC100132813</i> | 8  | 100132813 | 3 | 2 | 0 | 0 |

|              |    |           |   |   |   |   |
|--------------|----|-----------|---|---|---|---|
| LOC100500773 | 8  | 100500773 | 3 | 2 | 0 | 0 |
| LOC101927141 | 8  | 101927141 | 3 | 2 | 0 | 0 |
| LOC101927513 | 8  | 101927513 | 3 | 2 | 0 | 0 |
| LOC101927543 | 8  | 101927543 | 3 | 2 | 0 | 0 |
| LOC101927657 | 8  | 101927657 | 3 | 2 | 0 | 0 |
| LOC101927798 | 8  | 101927798 | 2 | 2 | 0 | 0 |
| LOC101927822 | 8  | 101927822 | 2 | 2 | 0 | 0 |
| LOC101927915 | 8  | 101927915 | 2 | 2 | 0 | 0 |
| LOC101929709 | 8  | 101929709 | 3 | 2 | 0 | 0 |
| LOC102723322 | 8  | 102723322 | 3 | 2 | 0 | 0 |
| LOC104054148 | 8  | 104054148 | 3 | 2 | 0 | 0 |
| LOC105369147 | 8  | 105369147 | 3 | 2 | 0 | 0 |
| LOC105374727 | 5  | 105374727 | 2 | 3 | 0 | 0 |
| LOC105375075 | 6  | 105375075 | 2 | 2 | 0 | 0 |
| LOC105375690 | 8  | 105375690 | 3 | 2 | 0 | 0 |
| LOC401261    | 6  | 401261    | 2 | 2 | 0 | 0 |
| LOC401478    | 8  | 401478    | 2 | 2 | 0 | 0 |
| LRATD2       | 8  | 157638    | 3 | 2 | 0 | 0 |
| LRRCC1       | 8  | 85444     | 3 | 2 | 0 | 0 |
| LY96         | 8  | 23643     | 3 | 2 | 0 | 0 |
| MAL2         | 8  | 114569    | 3 | 2 | 0 | 0 |
| MAL2-AS1     | 8  | 105375726 | 3 | 2 | 0 | 0 |
| MED30        | 8  | 90390     | 3 | 2 | 0 | 0 |
| MIEN1        | 17 | 84299     | 2 | 2 | 0 | 0 |
| MIR1204      | 8  | 100302185 | 3 | 2 | 0 | 0 |
| MIR1205      | 8  | 100302161 | 2 | 2 | 0 | 0 |
| MIR1206      | 8  | 100302170 | 3 | 2 | 0 | 0 |
| MIR2053      | 8  | 100302225 | 3 | 2 | 0 | 0 |
| MIR3151      | 8  | 100422992 | 3 | 2 | 0 | 0 |
| MIR3686      | 8  | 100500839 | 2 | 2 | 0 | 0 |
| MIR4470      | 8  | 100616484 | 3 | 2 | 0 | 0 |
| MIR4471      | 8  | 100616451 | 3 | 2 | 0 | 0 |
| MIR4642      | 6  | 100616352 | 2 | 2 | 0 | 0 |
| MIR4728      | 17 | 100616132 | 2 | 2 | 0 | 0 |
| MIR548AA1    | 8  | 100500863 | 3 | 2 | 0 | 0 |
| MIR548AZ     | 8  | 102466162 | 3 | 2 | 0 | 0 |
| MIR548D1     | 8  | 693130    | 3 | 2 | 0 | 0 |
| MIR5680      | 8  | 100847001 | 3 | 2 | 0 | 0 |
| MIR580       | 5  | 693165    | 2 | 2 | 0 | 0 |
| MIR586       | 6  | 693171    | 2 | 2 | 0 | 0 |
| MIR599       | 8  | 693184    | 3 | 3 | 0 | 0 |
| MIR875       | 8  | 100126309 | 3 | 3 | 0 | 0 |
| MRPL13       | 8  | 28998     | 3 | 2 | 0 | 0 |
| MTBP         | 8  | 27085     | 3 | 2 | 0 | 0 |
| MYC          | 8  | 4609      | 3 | 2 | 0 | 0 |
| NACA4P       | 8  | 83955     | 3 | 2 | 0 | 0 |
| NADK2        | 5  | 133686    | 2 | 3 | 0 | 0 |
| NBN          | 8  | 4683      | 3 | 2 | 0 | 0 |



|                   |    |           |   |   |   |   |
|-------------------|----|-----------|---|---|---|---|
| <i>NCALD</i>      | 8  | 83988     | 3 | 2 | 0 | 0 |
| <i>NIPBL</i>      | 5  | 25836     | 2 | 3 | 0 | 0 |
| <i>NIPBL-DT</i>   | 5  | 646719    | 2 | 3 | 0 | 0 |
| <i>NKAIN3</i>     | 8  | 286183    | 3 | 2 | 0 | 0 |
| <i>NKAIN3-IT1</i> | 8  | 643763    | 3 | 2 | 0 | 0 |
| <i>NUDCD1</i>     | 8  | 84955     | 3 | 2 | 0 | 0 |
| <i>NUP155</i>     | 5  | 9631      | 2 | 3 | 0 | 0 |
| <i>OSGIN2</i>     | 8  | 734       | 3 | 2 | 0 | 0 |
| <i>OSR2</i>       | 8  | 116039    | 3 | 2 | 0 | 0 |
| <i>OXR1</i>       | 8  | 55074     | 3 | 2 | 0 | 0 |
| <i>PABPC1</i>     | 8  | 26986     | 3 | 2 | 0 | 0 |
| <i>PCAT1</i>      | 8  | 100750225 | 3 | 4 | 0 | 0 |
| <i>PCAT2</i>      | 8  | 103164619 | 3 | 4 | 0 | 0 |
| <i>PEX6</i>       | 6  | 5190      | 2 | 2 | 0 | 0 |
| <i>PGAP3</i>      | 17 | 93210     | 2 | 2 | 0 | 0 |
| <i>PLEKHF1</i>    | 19 | 79156     | 2 | 2 | 0 | 0 |
| <i>PNMT</i>       | 17 | 5409      | 2 | 2 | 0 | 0 |
| <i>POLR2K</i>     | 8  | 5440      | 3 | 3 | 0 | 0 |
| <i>POP4</i>       | 19 | 10775     | 2 | 2 | 0 | 0 |
| <i>POU5F1B</i>    | 8  | 5462      | 3 | 2 | 0 | 0 |
| <i>PPP2R5D</i>    | 6  | 5528      | 2 | 2 | 0 | 0 |
| <i>PRNCR1</i>     | 8  | 101867536 | 3 | 4 | 0 | 0 |
| <i>PRPH2</i>      | 6  | 5961      | 2 | 2 | 0 | 0 |
| <i>PTCRA</i>      | 6  | 171558    | 2 | 2 | 0 | 0 |
| <i>PVT1</i>       | 8  | 5820      | 3 | 2 | 0 | 0 |
| <i>RALYL</i>      | 8  | 138046    | 3 | 2 | 0 | 0 |
| <i>RANBP3L</i>    | 5  | 202151    | 2 | 3 | 0 | 0 |
| <i>RGS22</i>      | 8  | 26166     | 3 | 3 | 0 | 0 |
| <i>RIMS2</i>      | 8  | 9699      | 3 | 2 | 0 | 0 |
| <i>RIPK2</i>      | 8  | 8767      | 3 | 2 | 0 | 0 |
| <i>RNF19A</i>     | 8  | 25897     | 3 | 2 | 0 | 0 |
| <i>RPL7L1</i>     | 6  | 285855    | 2 | 2 | 0 | 0 |
| <i>RRM2B</i>      | 8  | 50484     | 3 | 2 | 0 | 0 |
| <i>RSPO2</i>      | 8  | 340419    | 3 | 2 | 0 | 0 |
| <i>RUNX2</i>      | 6  | 860       | 2 | 2 | 0 | 0 |
| <i>SAMD12</i>     | 8  | 401474    | 3 | 3 | 0 | 0 |
| <i>SAMD12-AS1</i> | 8  | 552860    | 3 | 3 | 0 | 0 |
| <i>SKP2</i>       | 5  | 6502      | 2 | 2 | 0 | 0 |
| <i>SLC1A3</i>     | 5  | 6507      | 2 | 3 | 0 | 0 |
| <i>SLC25A32</i>   | 8  | 81034     | 3 | 2 | 0 | 0 |
| <i>SMILR</i>      | 8  | 105375734 | 3 | 2 | 0 | 0 |
| <i>SNORD168</i>   | 8  | 109623457 | 3 | 3 | 0 | 0 |
| <i>SNORD173</i>   | 8  | 109623480 | 3 | 2 | 0 | 0 |
| <i>SNORD77B</i>   | 8  | 109616982 | 3 | 3 | 0 | 0 |
| <i>SNTB1</i>      | 8  | 6641      | 3 | 2 | 0 | 0 |
| <i>SNX31</i>      | 8  | 169166    | 3 | 2 | 0 | 0 |
| <i>SPAG1</i>      | 8  | 6674      | 3 | 3 | 0 | 0 |
| <i>SPATS1</i>     | 6  | 221409    | 2 | 2 | 0 | 0 |

|                     |    |           |   |   |   |   |
|---------------------|----|-----------|---|---|---|---|
| <i>STAU2</i>        | 8  | 27067     | 3 | 2 | 0 | 0 |
| <i>STK3</i>         | 8  | 6788      | 3 | 2 | 0 | 0 |
| <i>SUPT3H</i>       | 6  | 8464      | 2 | 2 | 0 | 0 |
| <i>SYBU</i>         | 8  | 55638     | 3 | 3 | 0 | 0 |
| <i>TAF2</i>         | 8  | 6873      | 3 | 2 | 0 | 0 |
| <i>TBCC</i>         | 6  | 6903      | 2 | 2 | 0 | 0 |
| <i>TMEM70</i>       | 8  | 54968     | 3 | 2 | 0 | 0 |
| <i>TMEM74</i>       | 8  | 157753    | 3 | 2 | 0 | 0 |
| <i>TMEM75</i>       | 8  | 641384    | 3 | 2 | 0 | 0 |
| <i>TNFRSF11B</i>    | 8  | 4982      | 3 | 3 | 0 | 0 |
| <i>TRERF1</i>       | 6  | 55809     | 2 | 2 | 0 | 0 |
| <i>TRHR</i>         | 8  | 7201      | 3 | 2 | 0 | 0 |
| <i>UBE2W</i>        | 8  | 55284     | 3 | 2 | 0 | 0 |
| <i>UBR2</i>         | 6  | 23304     | 2 | 2 | 0 | 0 |
| <i>UBR5</i>         | 8  | 51366     | 3 | 2 | 0 | 0 |
| <i>UBR5-AS1</i>     | 8  | 101927221 | 3 | 2 | 0 | 0 |
| <i>URI1</i>         | 19 | 8725      | 2 | 2 | 0 | 0 |
| <i>VPS13B</i>       | 8  | 157680    | 3 | 3 | 0 | 0 |
| <i>VSTM2B</i>       | 19 | 342865    | 2 | 2 | 0 | 0 |
| <i>WDYHV1</i>       | 8  | 55093     | 3 | 2 | 0 | 0 |
| <i>YWHAZ</i>        | 8  | 7534      | 3 | 2 | 0 | 0 |
| <i>ZFPM2</i>        | 8  | 23414     | 3 | 2 | 0 | 0 |
| <i>ZFPM2-AS1</i>    | 8  | 102723356 | 3 | 2 | 0 | 0 |
| <i>ZHX1</i>         | 8  | 11244     | 3 | 2 | 0 | 0 |
| <i>ZHX1-C8orf76</i> | 8  | 100533106 | 3 | 2 | 0 | 0 |
| <i>ZNF706</i>       | 8  | 51123     | 3 | 2 | 0 | 0 |
| <i>ZBP2</i>         | 17 | 124626    | 2 | 2 | 0 | 0 |

(B) Genes located on the aberrated chromosomal segments in more than 15% of (2 or more) cancers belonging to Cluster B1 (n=12)

| Gene symbol <sup>1</sup> | Chromosome | National Center for<br>Biotechnology Information<br>(NCBI) Gene ID | Number of patients showing copy number alterations |                    |                    |                    |
|--------------------------|------------|--------------------------------------------------------------------|----------------------------------------------------|--------------------|--------------------|--------------------|
|                          |            |                                                                    | Gain                                               |                    | Loss               |                    |
|                          |            |                                                                    | ASCAT <sup>2</sup>                                 | GPHMM <sup>3</sup> | ASCAT <sup>2</sup> | GPHMM <sup>3</sup> |
| <i>ABRA</i>              | 8          | 137735                                                             | 2                                                  | 2                  | 0                  | 0                  |
| <i>ACTR3BP5</i>          | 10         | 399746                                                             | 2                                                  | 2                  | 0                  | 0                  |
| <i>ADCY8</i>             | 8          | 114                                                                | 3                                                  | 3                  | 0                  | 0                  |
| <i>ANGPT1</i>            | 8          | 284                                                                | 2                                                  | 2                  | 0                  | 0                  |
| <i>ANKH</i>              | 5          | 56172                                                              | 2                                                  | 2                  | 0                  | 0                  |
| <i>ANKRD30A</i>          | 10         | 91074                                                              | 2                                                  | 3                  | 0                  | 0                  |
| <i>ASAP1</i>             | 8          | 50807                                                              | 3                                                  | 3                  | 0                  | 0                  |
| <i>ASAP1-IT1</i>         | 8          | 29065                                                              | 3                                                  | 3                  | 0                  | 0                  |
| <i>ASAP1-IT2</i>         | 8          | 100507117                                                          | 3                                                  | 3                  | 0                  | 0                  |
| <i>B3GALT2</i>           | 1          | 8707                                                               | 2                                                  | 2                  | 0                  | 0                  |
| <i>BASP1</i>             | 5          | 10409                                                              | 2                                                  | 2                  | 0                  | 0                  |
| <i>BASP1-AS1</i>         | 5          | 285696                                                             | 2                                                  | 2                  | 0                  | 0                  |
| <i>BRINP3</i>            | 1          | 339479                                                             | 2                                                  | 2                  | 0                  | 0                  |
| <i>C5orf17</i>           | 5          | 439936                                                             | 2                                                  | 2                  | 0                  | 0                  |
| <i>C9</i>                | 5          | 735                                                                | 2                                                  | 2                  | 0                  | 0                  |
| <i>CASC11</i>            | 8          | 100270680                                                          | 3                                                  | 3                  | 0                  | 0                  |

|               |    |           |   |   |   |   |
|---------------|----|-----------|---|---|---|---|
| CASC19        | 8  | 103021165 | 3 | 3 | 0 | 0 |
| CASC21        | 8  | 103021164 | 3 | 3 | 0 | 0 |
| CASC8         | 8  | 727677    | 3 | 3 | 0 | 0 |
| CCAT1         | 8  | 100507056 | 3 | 3 | 0 | 0 |
| CCAT2         | 8  | 101805488 | 3 | 3 | 0 | 0 |
| CCDC26        | 8  | 137196    | 3 | 4 | 0 | 0 |
| CCN3          | 8  | 4856      | 2 | 2 | 0 | 0 |
| CDC73         | 1  | 79577     | 2 | 2 | 0 | 0 |
| CDH10         | 5  | 1008      | 2 | 2 | 0 | 0 |
| CDH12         | 5  | 1010      | 2 | 2 | 0 | 0 |
| CFH           | 1  | 3075      | 2 | 2 | 0 | 0 |
| CLDN11        | 3  | 5010      | 2 | 2 | 0 | 0 |
| COL14A1       | 8  | 7373      | 2 | 2 | 0 | 0 |
| COLEC10       | 8  | 10584     | 2 | 2 | 0 | 0 |
| CSMD3         | 8  | 114788    | 2 | 2 | 0 | 0 |
| CTD-2350J17.1 | 5  | 101929472 | 2 | 2 | 0 | 0 |
| DAB2          | 5  | 1601      | 2 | 2 | 0 | 0 |
| DEPTOR        | 8  | 64798     | 2 | 2 | 0 | 0 |
| DERL1         | 8  | 79139     | 2 | 2 | 0 | 0 |
| DSCC1         | 8  | 79075     | 2 | 2 | 0 | 0 |
| EBAG9         | 8  | 9166      | 2 | 2 | 0 | 0 |
| EFR3A         | 8  | 23167     | 2 | 2 | 0 | 0 |
| EGFEM1P       | 3  | 93556     | 2 | 2 | 0 | 0 |
| EIF3E         | 8  | 3646      | 2 | 2 | 0 | 0 |
| EMC2          | 8  | 9694      | 2 | 2 | 0 | 0 |
| ENPP2         | 8  | 5168      | 2 | 2 | 0 | 0 |
| ENY2          | 8  | 56943     | 2 | 2 | 0 | 0 |
| ERBB2         | 17 | 2064      | 2 | 3 | 0 | 0 |
| EXT1          | 8  | 2131      | 2 | 2 | 0 | 0 |
| FAM49B        | 8  | 51571     | 3 | 3 | 0 | 0 |
| FBXL7         | 5  | 23194     | 2 | 2 | 0 | 0 |
| FHIT          | 3  | 2272      | 0 | 1 | 3 | 4 |
| FYB1          | 5  | 2533      | 2 | 2 | 0 | 0 |
| GLRX2         | 1  | 51022     | 2 | 2 | 0 | 0 |
| GRB7          | 17 | 2886      | 2 | 2 | 0 | 0 |
| GSDMC         | 8  | 56169     | 3 | 3 | 0 | 0 |
| H3.Y          | 5  | 391769    | 2 | 2 | 0 | 0 |
| HAS2          | 8  | 3037      | 2 | 2 | 0 | 0 |
| HAS2-AS1      | 8  | 594842    | 2 | 2 | 0 | 0 |
| HHLA1         | 8  | 10086     | 2 | 2 | 0 | 0 |
| HPYR1         | 8  | 93668     | 2 | 2 | 0 | 0 |
| HSD17B7P2     | 10 | 158160    | 2 | 2 | 0 | 0 |
| KCNQ3         | 8  | 3786      | 2 | 2 | 0 | 0 |
| KCNT2         | 1  | 343450    | 2 | 2 | 0 | 0 |
| KCNV1         | 8  | 27012     | 2 | 2 | 0 | 0 |
| LINC00603     | 5  | 102467077 | 2 | 2 | 0 | 0 |
| LINC00824     | 8  | 101927774 | 3 | 3 | 0 | 0 |
| LINC00861     | 8  | 100130231 | 3 | 3 | 0 | 0 |

|              |    |           |   |   |   |   |
|--------------|----|-----------|---|---|---|---|
| LINC00976    | 8  | 106144608 | 3 | 4 | 0 | 0 |
| LINC00977    | 8  | 728724    | 3 | 4 | 0 | 0 |
| LINC00993    | 10 | 101929520 | 2 | 3 | 0 | 0 |
| LINC00999    | 10 | 399744    | 2 | 2 | 0 | 0 |
| LINC01031    | 1  | 101929184 | 2 | 2 | 0 | 0 |
| LINC01036    | 1  | 104169671 | 2 | 2 | 0 | 0 |
| LINC01037    | 1  | 106144535 | 2 | 2 | 0 | 0 |
| LINC01151    | 8  | 104266958 | 2 | 2 | 0 | 0 |
| LINC01608    | 8  | 101927459 | 2 | 2 | 0 | 0 |
| LINC01609    | 8  | 101927487 | 2 | 2 | 0 | 0 |
| LINC01680    | 1  | 105371660 | 2 | 2 | 0 | 0 |
| LINC01720    | 1  | 440704    | 2 | 2 | 0 | 0 |
| LINC01724    | 1  | 105371673 | 2 | 2 | 0 | 0 |
| LINC02055    | 8  | 107986980 | 2 | 2 | 0 | 0 |
| LINC02082    | 3  | 100507661 | 2 | 2 | 0 | 0 |
| LINC02104    | 5  | 101926940 | 2 | 2 | 0 | 0 |
| LINC02111    | 5  | 401177    | 2 | 2 | 0 | 0 |
| LINC02150    | 5  | 101929505 | 2 | 2 | 0 | 0 |
| LINC02211    | 5  | 105374693 | 2 | 2 | 0 | 0 |
| LINC02217    | 5  | 101929544 | 2 | 2 | 0 | 0 |
| LINC02218    | 5  | 102723526 | 2 | 2 | 0 | 0 |
| LINC02223    | 5  | 646241    | 2 | 2 | 0 | 0 |
| LINC02228    | 5  | 105374694 | 2 | 2 | 0 | 0 |
| LINC02237    | 8  | 105375706 | 2 | 2 | 0 | 0 |
| LINC02239    | 5  | 340107    | 2 | 2 | 0 | 0 |
| LOC100129055 | 10 | 100129055 | 2 | 2 | 0 | 0 |
| LOC100132813 | 8  | 100132813 | 2 | 2 | 0 | 0 |
| LOC101927513 | 8  | 101927513 | 2 | 2 | 0 | 0 |
| LOC101927543 | 8  | 101927543 | 2 | 2 | 0 | 0 |
| LOC101927657 | 8  | 101927657 | 3 | 3 | 0 | 0 |
| LOC101927915 | 8  | 101927915 | 2 | 2 | 0 | 0 |
| LOC401176    | 5  | 401176    | 2 | 2 | 0 | 0 |
| LOC401478    | 8  | 401478    | 2 | 2 | 0 | 0 |
| LRATD2       | 8  | 157638    | 3 | 3 | 0 | 0 |
| LRR6         | 8  | 23639     | 2 | 2 | 0 | 0 |
| MACROD2      | 20 | 140733    | 0 | 0 | 2 | 2 |
| MAL2         | 8  | 114569    | 2 | 2 | 0 | 0 |
| MAL2-AS1     | 8  | 105375726 | 2 | 2 | 0 | 0 |
| MARCH11      | 5  | 441061    | 2 | 2 | 0 | 0 |
| MECOM        | 3  | 2122      | 2 | 2 | 0 | 0 |
| MED30        | 8  | 90390     | 2 | 2 | 0 | 0 |
| MIEN1        | 17 | 84299     | 2 | 3 | 0 | 0 |
| MIR10522     | 5  | 113218490 | 2 | 2 | 0 | 0 |
| MIR1204      | 8  | 100302185 | 3 | 3 | 0 | 0 |
| MIR1205      | 8  | 100302161 | 3 | 3 | 0 | 0 |
| MIR1206      | 8  | 100302170 | 3 | 3 | 0 | 0 |
| MIR1207      | 8  | 100302175 | 3 | 3 | 0 | 0 |
| MIR1208      | 8  | 100302281 | 3 | 3 | 0 | 0 |

|                    |    |           |   |   |   |   |
|--------------------|----|-----------|---|---|---|---|
| <i>MIR1278</i>     | 1  | 100302163 | 2 | 2 | 0 | 0 |
| <i>MIR2053</i>     | 8  | 100302225 | 2 | 2 | 0 | 0 |
| <i>MIR3686</i>     | 8  | 100500839 | 3 | 4 | 0 | 0 |
| <i>MIR4728</i>     | 17 | 100616132 | 2 | 3 | 0 | 0 |
| <i>MIR4735</i>     | 1  | 100616363 | 2 | 2 | 0 | 0 |
| <i>MIR5194</i>     | 8  | 100847051 | 3 | 3 | 0 | 0 |
| <i>MIR548AZ</i>    | 8  | 102466162 | 2 | 2 | 0 | 0 |
| <i>MIR6828</i>     | 3  | 102465497 | 2 | 2 | 0 | 0 |
| <i>MIR887</i>      | 5  | 100126347 | 2 | 2 | 0 | 0 |
| <i>MRPL13</i>      | 8  | 28998     | 2 | 2 | 0 | 0 |
| <i>MTBP</i>        | 8  | 27085     | 2 | 2 | 0 | 0 |
| <i>MTRNR2L7</i>    | 10 | 100288485 | 2 | 3 | 0 | 0 |
| <i>MYC</i>         | 8  | 4609      | 3 | 3 | 0 | 0 |
| <i>MYO10</i>       | 5  | 4651      | 2 | 2 | 0 | 0 |
| <i>NDRG1</i>       | 8  | 10397     | 2 | 2 | 0 | 0 |
| <i>NEK7</i>        | 1  | 140609    | 2 | 2 | 0 | 0 |
| <i>NSMCE2</i>      | 8  | 286053    | 2 | 2 | 0 | 0 |
| <i>NUDCD1</i>      | 8  | 84955     | 2 | 2 | 0 | 0 |
| <i>OC90</i>        | 8  | 729330    | 2 | 2 | 0 | 0 |
| <i>OTULIN</i>      | 5  | 90268     | 2 | 2 | 0 | 0 |
| <i>OTULINL</i>     | 5  | 54491     | 2 | 2 | 0 | 0 |
| <i>OXR1</i>        | 8  | 55074     | 2 | 2 | 0 | 0 |
| <i>PCAT1</i>       | 8  | 100750225 | 3 | 3 | 0 | 0 |
| <i>PCAT2</i>       | 8  | 103164619 | 3 | 3 | 0 | 0 |
| <i>PGAP3</i>       | 17 | 93210     | 2 | 3 | 0 | 0 |
| <i>PHF20L1</i>     | 8  | 51105     | 2 | 2 | 0 | 0 |
| <i>PKHD1L1</i>     | 8  | 93035     | 2 | 2 | 0 | 0 |
| <i>PNMT</i>        | 17 | 5409      | 2 | 3 | 0 | 0 |
| <i>POU5F1B</i>     | 8  | 5462      | 3 | 3 | 0 | 0 |
| <i>PRDM9</i>       | 5  | 56979     | 2 | 2 | 0 | 0 |
| <i>PRKCI</i>       | 3  | 5584      | 2 | 2 | 0 | 0 |
| <i>PRNCR1</i>      | 8  | 101867536 | 3 | 3 | 0 | 0 |
| <i>PVT1</i>        | 8  | 5820      | 3 | 3 | 0 | 0 |
| <i>RETREG1</i>     | 5  | 54463     | 2 | 2 | 0 | 0 |
| <i>RICTOR</i>      | 5  | 253260    | 2 | 2 | 0 | 0 |
| <i>RO60</i>        | 1  | 6738      | 2 | 2 | 0 | 0 |
| <i>RSPO2</i>       | 8  | 340419    | 2 | 2 | 0 | 0 |
| <i>SAMD12</i>      | 8  | 401474    | 2 | 2 | 0 | 0 |
| <i>SAMD12-AS1</i>  | 8  | 552860    | 2 | 2 | 0 | 0 |
| <i>SEPTIN7P9</i>   | 10 | 285961    | 2 | 2 | 0 | 0 |
| <i>SKIL</i>        | 3  | 6498      | 2 | 2 | 0 | 0 |
| <i>SLC30A8</i>     | 8  | 169026    | 2 | 2 | 0 | 0 |
| <i>SLC7A14</i>     | 3  | 57709     | 2 | 2 | 0 | 0 |
| <i>SLC7A14-AS1</i> | 3  | 101928583 | 2 | 2 | 0 | 0 |
| <i>SMILR</i>       | 8  | 105375734 | 2 | 2 | 0 | 0 |
| <i>SNORD141A</i>   | 5  | 106635683 | 2 | 2 | 0 | 0 |
| <i>SNORD141B</i>   | 5  | 106635684 | 2 | 2 | 0 | 0 |
| <i>SNORD168</i>    | 8  | 109623457 | 2 | 2 | 0 | 0 |

|                  |    |        |   |   |   |   |
|------------------|----|--------|---|---|---|---|
| <i>SNTB1</i>     | 8  | 6641   | 2 | 2 | 0 | 0 |
| <i>ST3GAL1</i>   | 8  | 6482   | 2 | 2 | 0 | 0 |
| <i>STARD3</i>    | 17 | 10948  | 2 | 3 | 0 | 0 |
| <i>SYBU</i>      | 8  | 55638  | 2 | 2 | 0 | 0 |
| <i>SYCP2</i>     | 20 | 10388  | 2 | 2 | 0 | 0 |
| <i>TAF2</i>      | 8  | 6873   | 2 | 2 | 0 | 0 |
| <i>TBC1D31</i>   | 8  | 93594  | 2 | 2 | 0 | 0 |
| <i>TCAP</i>      | 17 | 8557   | 2 | 3 | 0 | 0 |
| <i>TG</i>        | 8  | 7038   | 2 | 2 | 0 | 0 |
| <i>TMEM71</i>    | 8  | 137835 | 2 | 2 | 0 | 0 |
| <i>TMEM74</i>    | 8  | 157753 | 2 | 2 | 0 | 0 |
| <i>TMEM75</i>    | 8  | 641384 | 3 | 3 | 0 | 0 |
| <i>TNFRSF11B</i> | 8  | 4982   | 2 | 2 | 0 | 0 |
| <i>TRHR</i>      | 8  | 7201   | 2 | 2 | 0 | 0 |
| <i>TRIB1</i>     | 8  | 10221  | 2 | 2 | 0 | 0 |
| <i>TSHZ2</i>     | 20 | 128553 | 2 | 2 | 0 | 0 |
| <i>ZHX2</i>      | 8  | 22882  | 2 | 2 | 0 | 0 |
| <i>ZNF33A</i>    | 10 | 7581   | 2 | 2 | 0 | 0 |
| <i>ZNF37A</i>    | 10 | 7587   | 2 | 2 | 0 | 0 |
| <i>ZNF622</i>    | 5  | 90441  | 2 | 2 | 0 | 0 |

(C) Genes located on the aberrated chromosomal segments in more than 15% of (7 or more) cancers belonging to Cluster B2 (n=42)

| Gene symbol <sup>1</sup> | Chromosome | National Center for<br>Biotechnology Information<br>(NCBI) Gene ID | Number of patients showing copy number alterations |                    |                    |                    |
|--------------------------|------------|--------------------------------------------------------------------|----------------------------------------------------|--------------------|--------------------|--------------------|
|                          |            |                                                                    | Gain                                               |                    | Loss               |                    |
|                          |            |                                                                    | ASCAT <sup>2</sup>                                 | GPHMM <sup>3</sup> | ASCAT <sup>2</sup> | GPHMM <sup>3</sup> |
| <i>BCAS1</i>             | 20         | 8537                                                               | 7                                                  | 8                  | 0                  | 0                  |
| <i>CYP24A1</i>           | 20         | 1591                                                               | 7                                                  | 8                  | 0                  | 0                  |
| <i>DOK5</i>              | 20         | 55816                                                              | 8                                                  | 9                  | 0                  | 0                  |
| <i>FHIT</i>              | 3          | 2272                                                               | 1                                                  | 0                  | 10                 | 15                 |
| <i>LINC01429</i>         | 20         | 101927678                                                          | 7                                                  | 7                  | 0                  | 0                  |
| <i>LINC01440</i>         | 20         | 102723578                                                          | 7                                                  | 8                  | 0                  | 0                  |
| <i>LINC01441</i>         | 20         | 101927796                                                          | 7                                                  | 8                  | 0                  | 0                  |
| <i>LINC01524</i>         | 20         | 101927700                                                          | 9                                                  | 9                  | 0                  | 0                  |
| <i>LOC105372672</i>      | 20         | 105372672                                                          | 7                                                  | 7                  | 0                  | 0                  |
| <i>MIR4756</i>           | 20         | 100616225                                                          | 7                                                  | 8                  | 0                  | 0                  |
| <i>PFDN4</i>             | 20         | 5203                                                               | 8                                                  | 8                  | 0                  | 0                  |
| <i>PLCB1</i>             | 20         | 23236                                                              | 8                                                  | 7                  | 0                  | 0                  |
| <i>PLCB4</i>             | 20         | 5332                                                               | 7                                                  | 7                  | 0                  | 0                  |
| <i>SUMO1P1</i>           | 20         | 391257                                                             | 7                                                  | 8                  | 0                  | 0                  |
| <i>TMX4</i>              | 20         | 56255                                                              | 8                                                  | 7                  | 0                  | 0                  |
| <i>TSHZ2</i>             | 20         | 128553                                                             | 7                                                  | 8                  | 0                  | 0                  |
| <i>ZFP64</i>             | 20         | 55734                                                              | 8                                                  | 9                  | 0                  | 0                  |
| <i>ZNF217</i>            | 20         | 7764                                                               | 7                                                  | 7                  | 0                  | 0                  |

---

<sup>1</sup>Genes located on the chromosomal segments showing gain (copy number of 6 or more) and loss (copy number of 0) across 22 autosomes were identified by BEDTools (version 2.29.0) (<https://bedtools.readthedocs.io/en/latest/#>) (Ref. 30). <sup>2</sup>Copy number alterations based on Allele-Specific Copy Number Analysis of Tumors software (ASCAT, version 2.5.2) (<https://www.crick.ac.uk/research/labs/peter-van-loo/software>) (Ref. 28). <sup>3</sup>Copy number alterations based on Global Parameter Hidden Markov Model software (GPHMM, version 1.3) (<http://bioinformatics.ustc.edu.cn/gphmm/>) (Ref. 29).

**Supplementary Table 10.** Number of epigenetically and genetically aberrated genes in Clusters A, B1 and B2

| Cluster | Number of aberrated genes                                                                  |                                                                                                                                       |                                                                                           |      |                         |
|---------|--------------------------------------------------------------------------------------------|---------------------------------------------------------------------------------------------------------------------------------------|-------------------------------------------------------------------------------------------|------|-------------------------|
|         | Genes showing DNA methylation alterations between C and T samples (Supplementary Table S4) | Genes showing SNVs and/or indels that were detected in more than 15% of cases, and affected protein function (Supplementary Table S7) | Genes showing CNAs which were detected in more than 15% of cases (Supplementary Table S9) |      | Total excluding overlap |
|         |                                                                                            |                                                                                                                                       | Gain                                                                                      | Loss |                         |
| A       | 783                                                                                        | 515                                                                                                                                   | 213                                                                                       | 1    | 1453                    |
| B1      | 367                                                                                        | 345                                                                                                                                   | 178                                                                                       | 2    | 865                     |
| B2      | 550                                                                                        | 112                                                                                                                                   | 17                                                                                        | 1    | 663                     |

SNVs, single-nucleotide variants; indels, insertions/deletions; CNAs, copy number aberrations.



**Supplementary Table 11.** Statistically significant GeneGo pathway maps (False discovery rate [FDR]<0.05) revealed by MetaCore software (Thomson Reuters, NY) using epigenetically and genetically affected genes in gastric carcinomas belonging to Clusters A, B1 and B2

**(A) Statistically significant GeneGo pathway maps in Cluster A**

| Enriched pathways                                                                                | FDR   | P       | Genes showing DNA methylation alterations, single nucleotide variants (SNVs), insertion/deletions (indels) and/or copy number aberrations (CNAs) |
|--------------------------------------------------------------------------------------------------|-------|---------|--------------------------------------------------------------------------------------------------------------------------------------------------|
| WNT signaling in gastric cancer                                                                  | 0.010 | < 0.001 | SKP2, SFRP1, SFRP2, APC, WNT8A, FZD2, WNT2, TNF                                                                                                  |
| Immune response_IL-4-induced regulators of cell growth, survival, differentiation and metabolism | 0.010 | < 0.001 | FABP4, FLG, CCNA1, MMP13, ALDH1A2, TNFRSF11B, PLEKHF1, FOXO1, KCNN4, MYC, CCNE1, LPL                                                             |
| Gamma-secretase proteolytic targets                                                              | 0.013 | < 0.001 | BACE2, CDH2, FLT1, LRP1B, ERBB4, NOTCH3                                                                                                          |
| Development_Negative regulation of WNT/Beta-catenin signaling in the nucleus                     | 0.016 | < 0.001 | FHIT, KDM2B, RNF43, PAX7, TLE4, RUNX3, VHL, WNT2, APC, SOX17, CTNNA1, FZD2, NOS3, YWHAZ                                                          |
| Cytoskeleton remodeling_Keratin filaments                                                        | 0.026 | 0.001   | PLEC, TUBB8, KRT16, EPPK1, KRT1, KRT14, PKP2, VIM                                                                                                |
| E-cadherin signaling and its regulation in gastric cancer                                        | 0.026 | 0.001   | ACTN2, TWIST1, WNT2, ACTA1, EGFR, CTNNA1, FZD2, ZEB2                                                                                             |
| Stem cells_Schema: FGF signaling in embryonic stem cell self-renewal and differentiation         | 0.034 | 0.001   | TBXT, PTF1A, SOX1, KDR, PTCH1, NEFM, PDX1, IGF2, SOX17                                                                                           |
| DNA damage_ATM/ATR regulation of G1/S checkpoint                                                 | 0.047 | 0.001   | CCNA1, BRCA1, TP53, MYC, CCNE1, NBN, ATM                                                                                                         |
| Proteolysis_Role of Parkin in the Ubiquitin-Proteasomal Pathway                                  | 0.048 | 0.001   | TUBB8, RNF19A, HSPA2, CASP8, CCNE1, SNCAIP                                                                                                       |

**(B) Statistically significant GeneGo pathway maps in Cluster B1**

| Enriched pathways                                                                                      | FDR   | P       | Genes showing DNA methylation alterations, SNVs, indels, and/or CNAs             |
|--------------------------------------------------------------------------------------------------------|-------|---------|----------------------------------------------------------------------------------|
| Cell adhesion_Histamine H1 receptor signaling in the interruption of cell barrier integrity            | 0.000 | < 0.001 | TLN2, CDH1, CTNNB1, PRKCD, ROCK1, ACTB, CTNNA3, MYLK, ITPR3, GNA15               |
| Gamma-secretase proteolytic targets                                                                    | 0.001 | < 0.001 | CDH2, LRP1B, ERBB4, CDH1                                                         |
| Cell adhesion_Role of CDK5 in cell adhesion                                                            | 0.001 | < 0.001 | TLN2, CDH1, CTNNB1, CTNNA3, ERBB2                                                |
| Cytoskeleton remodeling_Keratin filaments                                                              | 0.001 | < 0.001 | PLEC, TUBB8, PKP2, EPPK1, VIM, ACTB, KRT1, KRT13                                 |
| Development_Regulation of epithelial-to-mesenchymal transition (EMT)                                   | 0.002 | < 0.001 | IL1B, CDH2, CDH1, VIM, WNT16, MMP9, FZD10, ACTB, SKIL, TWIST1                    |
| Cytoskeleton remodeling_Role of PKA in cytoskeleton reorganisation                                     | 0.002 | < 0.001 | ROCK1, PRKAR1B, ADCY4, ACTB, MYLK, ITPR3, ADD2                                   |
| Signal transduction_mTORC2 downstream signaling                                                        | 0.003 | < 0.001 | RICTOR, TP53, CTNNB1, PRKCD, MYC, PRKAR1B, IGF2, ACTB, FLNA, PRKCI               |
| Development_Negative feedback regulation of WNT/Beta-catenin signaling                                 | 0.003 | < 0.001 | CTNNB1, PRKCD, RNF43, WNT16, HUWE1, TRRAP, FZD10                                 |
| Chemotaxis_Lysophosphatidic acid signaling via GPCRs                                                   | 0.003 | < 0.001 | CDH1, TP53, CTNNB1, PRKCD, HAS2, ACTB, PLCH1, ROCK1, ITPR3, PRKCI, MAP2K4, GNA15 |
| Development_Negative regulation of WNT/Beta-catenin signaling in the nucleus                           | 0.004 | < 0.001 | RUNX3, FHIT, VHL, CTNNB1, PRKCD, RNF43, PAX7, WNT16, GLI3, TRRAP, FZD10          |
| E-cadherin signaling and its regulation in gastric cancer                                              | 0.004 | < 0.001 | CDH1, CTNNB1, WNT16, ACTA1, CTNNA3, FZD10, TWIST1                                |
| Cell adhesion_Cadherin-mediated cell adhesion                                                          | 0.005 | < 0.001 | CDH2, CDH1, CTNNB1, ACTB, ACTA1, CTNNA3                                          |
| Cell adhesion_ECM remodeling                                                                           | 0.010 | < 0.001 | CXCR1, NID1, ACTB, FLOT2, MMP9, IGF2, ERBB4, COL4A1                              |
| Signal transduction_Modulation of calcium and potassium channels by Adenosine A1 receptor              | 0.011 | < 0.001 | CACNA1C, CACNA1E, PRKAR1B, CACNG3, ADCY4, ITPR3                                  |
| Hyaluronic acid/CD44 signaling in cancer                                                               | 0.012 | < 0.001 | ESR1, ROCK1, ACTB, MMP9, FLNA, VAV2, TWIST1, ROCK1                               |
| Cytoskeleton remodeling_Regulation of actin cytoskeleton organization by the kinase effectors of Rho G | 0.012 | < 0.001 | TLN2, PIP5K1A, ROCK1, ACTB, FLNA, SPTBN5, MYLK                                   |
| Cytoskeleton remodeling_Thyroliberin in cytoskeleton remodeling                                        | 0.013 | < 0.001 | TRHR, CACNA1C, PRKAR1B, ADCY4, TRH, ITPR3                                        |
| Development_Thyroliberin signaling                                                                     | 0.013 | < 0.001 | TRHR, CACNA1C, PRKCD, PRKAR1B, ADCY4, TRH, ITPR3, GNA15                          |
| Cell adhesion_Endothelial cell contacts by non-junctional mechanisms                                   | 0.018 | 0.001   | CDH2, CTNNB1, ACTB, CTNNA3, COL4A1                                               |
| Cell adhesion_Role of tetraspanins in the integrin-mediated cell adhesion                              | 0.020 | 0.001   | TLN2, CD53, ROCK1, ACTB, ACTA1, FLNA                                             |
| Signal transduction_Cyclic AMP signaling                                                               | 0.022 | 0.001   | PRKCD, PRKAR1B, ADCY4, ADCY8, PRKCI, RYR1                                        |
| Cell adhesion_Endothelial cell contacts by junctional mechanisms                                       | 0.023 | 0.001   | CDH2, CTNNB1, VIM, ACTB, CTNNA3                                                  |
| Chemotaxis_Inhibitory action of lipoxins on IL-8- and Leukotriene B4-induced neutrophil migration      | 0.024 | 0.001   | TLN2, CXCR1, PIP5K1A, ACTB, ACTA1, MYLK                                          |
| Chemotaxis_CCR1 signaling                                                                              | 0.024 | 0.001   | PRKCD, GNA15, MMP9, ADCY4, ITPR3, CCL15, CCL7                                    |
| Immune response_Platelet activating factor/PTAFR pathway signaling                                     | 0.027 | 0.001   | IL1B, STAT2, PRKAR1B, MMP9, ADCY4, ACTB, ITPR3                                   |
| Transcription_HIF-1 targets                                                                            | 0.042 | 0.003   | TP53, LEP, MYC, EPO, WT1, MMP9, CX3CR1, PFKFB3, GPI                              |
| Development_TGF-beta-dependent induction of EMT via RhoA, PI3K and ILK                                 | 0.042 | 0.003   | CDH1, CTNNB1, VIM, ACTA1, ROCK1, ACTB                                            |
| Development_Gastrin in cell growth and proliferation                                                   | 0.043 | 0.003   | CDH1, CTNNB1, PRKCD, MYC, ITPR3, MAP2K4, GNA15                                   |
| Development_Hedgehog signaling                                                                         | 0.044 | 0.003   | KIF27, CTNNB1, CSNK1A1L, GLI3, SMO                                               |
| Chemotaxis_CCL19- and CCL21-mediated chemotaxis                                                        | 0.044 | 0.003   | ROCK1, PRKAR1B, MMP9, ADCY4, ITPR3                                               |
| Signal transduction_Activin A signaling regulation                                                     | 0.044 | 0.003   | FOXG1, MECOM, H2BC17, SMAD4, H3C12                                               |
| Development_Negative regulation of WNT/Beta-catenin signaling in the cytoplasm                         | 0.044 | 0.003   | DAB2, CDH1, TP53, VHL, CTNNB1, WNT16, HUWE1, FZD10                               |
| Signal transduction_Adenosine A3 receptor signaling pathway                                            | 0.044 | 0.003   | IL1B, PRKCD, ADCY4, ITPR3, PRKCI, GNA15                                          |
| Cell adhesion_Integrin-mediated cell adhesion and migration                                            | 0.044 | 0.003   | TLN2, MYLK, ROCK1, ACTB, COL4A1                                                  |
| Cell cycle_Chromosome condensation in prometaphase                                                     | 0.045 | 0.004   | NCAPH, SMC4, H3C12                                                               |
| Role of Tissue factor-induced Thrombin signaling in cancerogenesis                                     | 0.046 | 0.004   | ANGPT1, ROCK1, ACTB, MYLK, ERBB2, ITPR3, GNA15                                   |
| Development_TGF-beta-dependent induction of EMT via SMADs                                              | 0.047 | 0.004   | CDH2, CDH1, VIM, SMAD4, TWIST1                                                   |
| Stem cells_Extraembryonic differentiation of embryonic stem cells                                      | 0.047 | 0.004   | ID4, SOX1, MAP2, SMAD4, GCM1                                                     |
| Inhibition of RUNX3 signaling in gastric cancer                                                        | 0.047 | 0.004   | RUNX3, CASP8, MMP9, H3C12                                                        |

**(C) Statistically significant GeneGo pathway maps in Cluster B2**

| Enriched pathways                                                                         | FDR   | P       | Genes showing DNA methylation alterations, SNVs, indels, and/or CNAs |
|-------------------------------------------------------------------------------------------|-------|---------|----------------------------------------------------------------------|
| Development_Thyroliberin signaling                                                        | 0.018 | < 0.001 | TRHR, PRKCB, NOS1, PRKAR1B, ADCY4, PLCB1, TRH, GNA15                 |
| Gamma-secretase proteolytic targets                                                       | 0.018 | < 0.001 | LRP1B, CDH2, ERBB4                                                   |
| Cytoskeleton remodeling_Thyroliberin in cytoskeleton remodeling                           | 0.018 | < 0.001 | TRHR, PRKCB, PRKAR1B, ADCY4, PLCB1, TRH                              |
| Development_Regulation of epithelial-to-mesenchymal transition (EMT)                      | 0.020 | < 0.001 | IL1B, CDH2, VIM, WNT2, FGF2, FZD10, TWIST1, TNF                      |
| Signal transduction_mTORC2 downstream signaling                                           | 0.023 | 0.001   | TP53, PRKCB, PRKAR1B, IGF2, TLR4, PREX1                              |
| Signal transduction_Modulation of calcium and potassium channels by Adenosine A1 receptor | 0.034 | 0.001   | CACNA1B, CACNA1E, PRKCB, PRKAR1B, ADCY4, ABCC9                       |
| Stem cells_Schema: FGF signaling in embryonic stem cell self-renewal and differentiation  | 0.046 | 0.002   | TBXT, NEFM, PTF1A, FGF2, SOX1, IGF2                                  |
| Signal transduction_Adenosine A3 receptor signaling pathway                               | 0.046 | 0.002   | IL1B, ADCY4, PRKCB, GNA15, TNF, PLCB4                                |

Genes included in Supplementary Tables S4, S8 and S10 and summarized in Supplementary Tables S11 were subjected to Metacore pathway analysis. For Clusters A, B1 and B2, such genes were significantly accumulated in 40, 116 and 55 pathways (FDR<0.05), respectively. After elimination of pathways which solely participate in organs or tissue other than the stomach or diseases other than cancer, 9, 43 and 9 pathways in Clusters A, B1 and B2 are listed above.

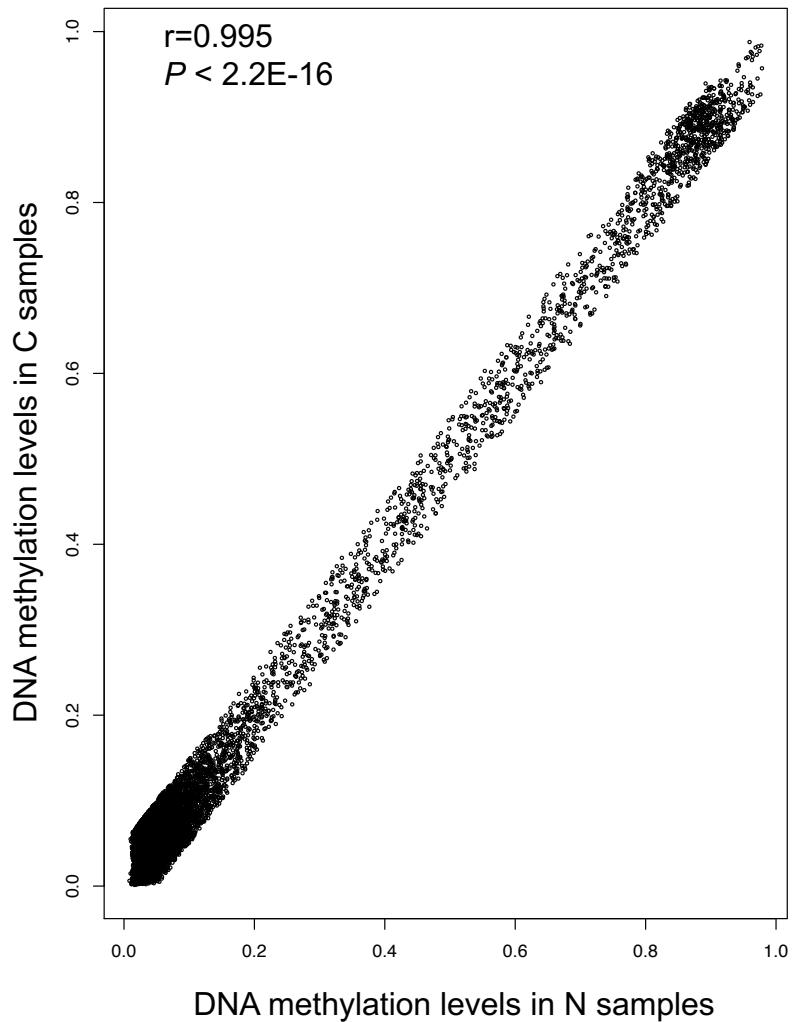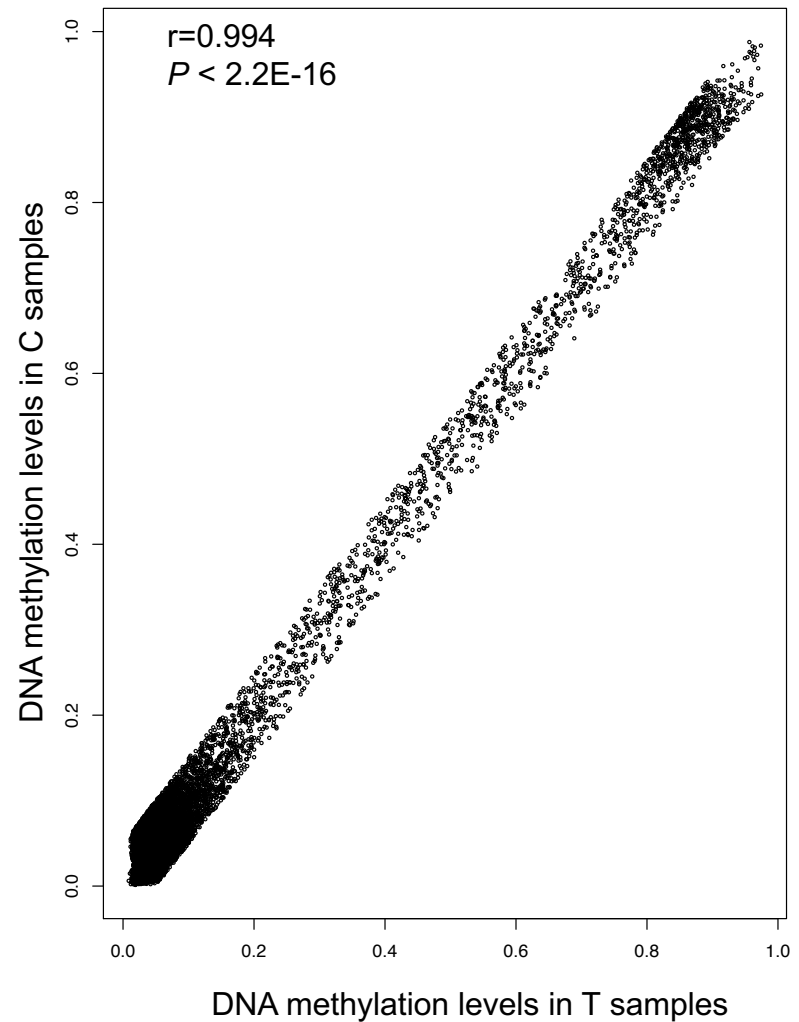

**Supplementary Figure 1** Scattergrams of DNA methylation levels of 12,556 probes not showing any correlation with carcinogenetic steps nor aging in all C (n=21), N (n=109) and T (n=105) samples. DNA methylation levels on such probes of C samples showed the excellent accordance with those of both N and T samples, indicating that differences of processing procedures of C samples did not affect the DNA methylation profiles.

(A)

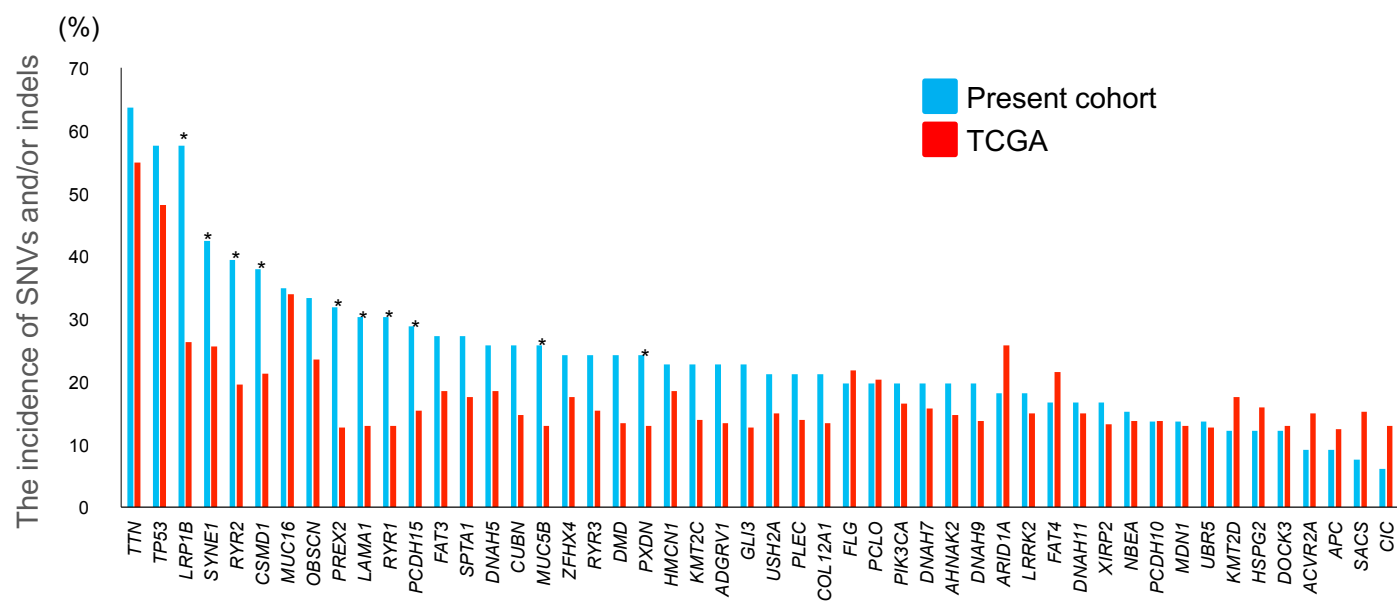

(B)

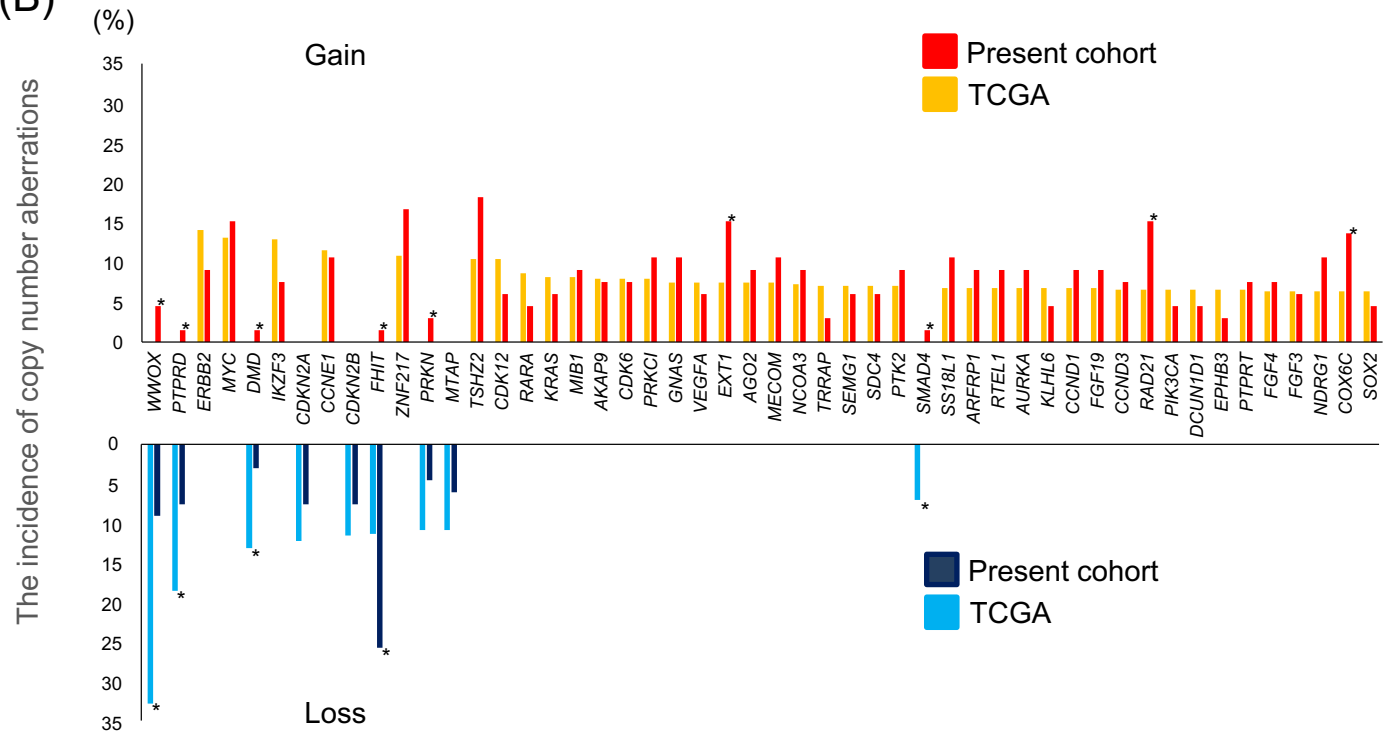

**Supplementary Figure 2** The incidences of single-nucleotide variants (SNVs) and/or insertions/deletions (indels) **(A)** and copy number alterations (gains and/or losses) **(B)** of the top 50 genes most frequently showing such genetic aberrations in gastric carcinomas deposited in the Cancer Genome Atlas (TCGA) database (<http://cancergenome.nih.gov>). Such incidences in our cohort (n=66) were compared to those in the TCGA database. **(A)** Although the incidence of SNVs and/or indels of the *LRP1B*, *SYNE1*, *RYR2*, *CSMD1*, *PREX2*, *LAMA1*, *RYR1*, *PCDH15*, *MUC5B*, and *PXDN* genes (asterisks) differed significantly between our cohort and the TCGA database, significant differences were not observed for the remaining 40 genes, indicating the reliability of our exome analysis (Fisher exact test,  $P < 0.01$ ). **(B)** Although the incidence of copy number alterations (gains and/or losses) of the *WWOX*, *PTRRD*, *DMD*, *FHIT*, *PRKN*, *EXT1*, *SMAD4*, *RAD21* and *COX6C* genes (asterisks) differed between our cohort and the TCGA database, significant differences were not observed for the remaining 41 genes (Fisher exact test,  $P < 0.01$ ). These consistencies indicated the reliability of our exome analysis.
